# Supplementary material
Source: PubMed Central journal article supplement (PMC3384008)
Supplement: NIHMS384780-supplement-1_si_001.pdf [file NIHMS384780-supplement-1_si_001.pdf]

# Wide-Open Flaps are Key to Urease Activity

---

## Supporting Information

Benjamin P. Roberts, Bill R. Miller III, Adrian E. Roitberg and Kenneth M. Merz Jr.  
Quantum Theory Project, University of Florida, PO Box 118435, Gainesville, Florida 32611-8435,  
United States  
E-mail: merz@qtp.ufl.edu

## Computational Methods

For starting structures, we used the PDB entries 1FWJ (closed flap) and 1EJX (open flap), both crystal structures of *Klebsiella aerogenes* urease. Because 1EJX misses residues 1001 and 1320 – 1329 (original PDB numbering), where 1320 – 1329 are part of the flap, we filled in its missing sections by means of homology modelling based on the urease from *Bacillus pasteurii* (PDB ID 2UBP), using Prime version 2.2,<sup>1-3</sup> part of the Schrödinger 2010 suite. PDB text of *K. aerogenes* urease with a flap in the wide-open conformation can be found at the end of this document.

For the protein, the FF99SB force field<sup>4</sup> was used, except for the supplementary parameters needed to model the dinickel cluster. These parameters were prepared using MCPB<sup>5</sup> and the MTK++ libraries.<sup>5</sup> The required DFT calculations were performed with Gaussian 03.<sup>6</sup> We used the B3LYP functional.<sup>7-10</sup> For the optimisation and frequency calculations to determine bond and angle force constants, we used a mixed basis set, with LANL2DZ<sup>11-14</sup> being used for the nickel ions and 6-31G\*<sup>15-24</sup> for all other atoms in the defined small cluster. On the nickel ions, LANL2DZ pseudopotentials were also used. For the calculation on the defined large cluster, which was used to compute charges according to the RESP method, the 6-31G\* basis set was used on all atoms. The parameters obtained from this procedure are shown in Table 1 (atom types and Lennard-Jones parameters), Table 2 (bond parameters), Table 3 (angle parameters), Table 4 (proper dihedral parameters), Table 5 (improper dihedral parameters) and Table 6 (atomic partial charges). We gave the residues in the dinickel cluster unique residue names to avoid accidentally overriding other parameters. For the same reason, we gave some atoms in these residues new atom types. Residue names are shown in Figure 1, atom names in Figure 2, and atom types in Figure 3. For solvent water molecules (but not those bound to the nickel ions), we used the TIP3P water model.<sup>25</sup>

Molecular dynamics simulations were run using Amber 11.<sup>26</sup> Preliminary calculations, namely steps 1 to 6 of the closed-flap simulation and steps 1 to 3 of the open-flap simulation (see below), were run on a dual quad-core Mac Pro. The production molecular dynamics calculations were run on the Cray supercomputers Kraken and Athena. Kraken is a Cray XT5

system in which each node has two 2.6 GHz six-core AMD Opteron processors, while Athena is a Cray XT4 system in which each node has one 2.6 GHz four-core AMD Opteron processor.

In all simulations, we used truncated octahedral periodic cells, with a short-range non-bonding interaction cutoff distance of 10 Å. For long-range electrostatics, we used the Particle Mesh Ewald (PME) treatment of Darden *et al.*,<sup>27-29</sup> with a cubic spline switching function for the transition from direct sums to PME and an interpolation order of 4.

Our simulation of the closed-flap structure consisted of the following procedure:

1. We began by running 5,000 steps of energy minimisation, the first 500 of which used steepest descents, and the remaining 4,500 conjugate gradients. During this minimisation, we restrained all protein atoms, including hydrogen atoms, to their original positions with a 100 kcal mol<sup>-1</sup> Å<sup>-2</sup> harmonic restraint while leaving solvent and counter-ions free to move.
2. We followed this minimisation with a 1 ns molecular dynamics simulation with a time step of 1 fs and a constant pressure of 1 bar, and with all protein atoms restrained to their original positions as described in step 1 above. During this simulation, the system was heated from 0 K to 500 K during the first 200 ps, kept at 500 K for the next 400 ps, cooled to 300 K during the next 200 ps, and kept at 300 K for the final 200 ps.
3. We then ran a 10 ps molecular dynamics simulation with a time step of 0.5 fs and with all protein atoms restrained to their original positions as described in step 1 above, a total of 20,000 steps. During this simulation, we kept the volume constant while cooling the temperature down from 300 K, so that after 40,000 steps (if the simulation had run that long) the temperature would have reached 0 K. In the event, the temperature cooled down to approximately 170 K.
4. We then ran another 10 ps molecular dynamics simulation with a time step of 0.5 fs and with all protein atoms restrained to their original positions as described in step 1 above, another 20,000 steps. We cooled the temperature down from 170 K to 0 K over the course of this simulation, while keeping the volume constant.
5. We again minimised the energy of the structure for up to 10,000 steps, with the first 100 steps being steepest descents and the remainder conjugate gradients. During this minimisation, unlike in the initial minimisation (see step 1 above), all atoms were free to move.
6. We then ran 100 ps of molecular dynamics with a time step of 1 fs, heating the system gradually over the course of this simulation from 0 K to 310 K, while keeping the pressure constant at 1 bar.
7. The final stage was the main molecular dynamics itself. We ran a total of 183.442 ns of MD on the closed-flap structure, the first 10.0 ns of which used a time step of 1 fs and flexible hydrogens. For the remaining 173.442 ns, we used the SHAKE algorithm to fix hydrogens relative to their bonding partners and increased the time step to 2 fs. The temperature was set to 310 K using Langevin dynamics with a collision frequency of 5.0 preventing synchronization,<sup>30</sup> and the pressure was kept constant at 1 bar.

For the open-flap structure, we used a different simulation procedure:

1. We initially ran energy minimisation with all atoms free to move, for a maximum of 10,000 steps, of which the first 500 used the steepest-descents algorithm and the remainder used conjugate gradients. The simulation reached the 10,000<sup>th</sup> step without converging.
2. We then ran molecular dynamics starting from the minimised structure from step 1, for a total of 200 ps (100,000 steps with a time step of 2.0 fs). During the first 50,000 steps, we gradually increased the temperature from 0 K to 310 K, while during the last 50,000 steps the temperature was held constant at 310 K. Throughout the simulation, pressure was held constant at 1.0 bar. All protein atoms were restrained to their starting positions with a harmonic restraint of 10 kcal mol<sup>-1</sup> Å<sup>-2</sup>, and SHAKE was used on all hydrogen atoms.
3. We then ran molecular dynamics starting from the final structure of step 2, for a total of 1.0 ns (500,000 steps with a time step of 2.0 fs). The pressure was held constant at 1.0 bar, and the temperature at 310 K using Langevin dynamics with a collision frequency of 5.0. SHAKE was used on all hydrogen atoms.
4. We ran molecular dynamics starting from the final structure of step 3, for a total of 100.0 ns. The simulation setup was the same as in step 3, but with different random seeds where needed.

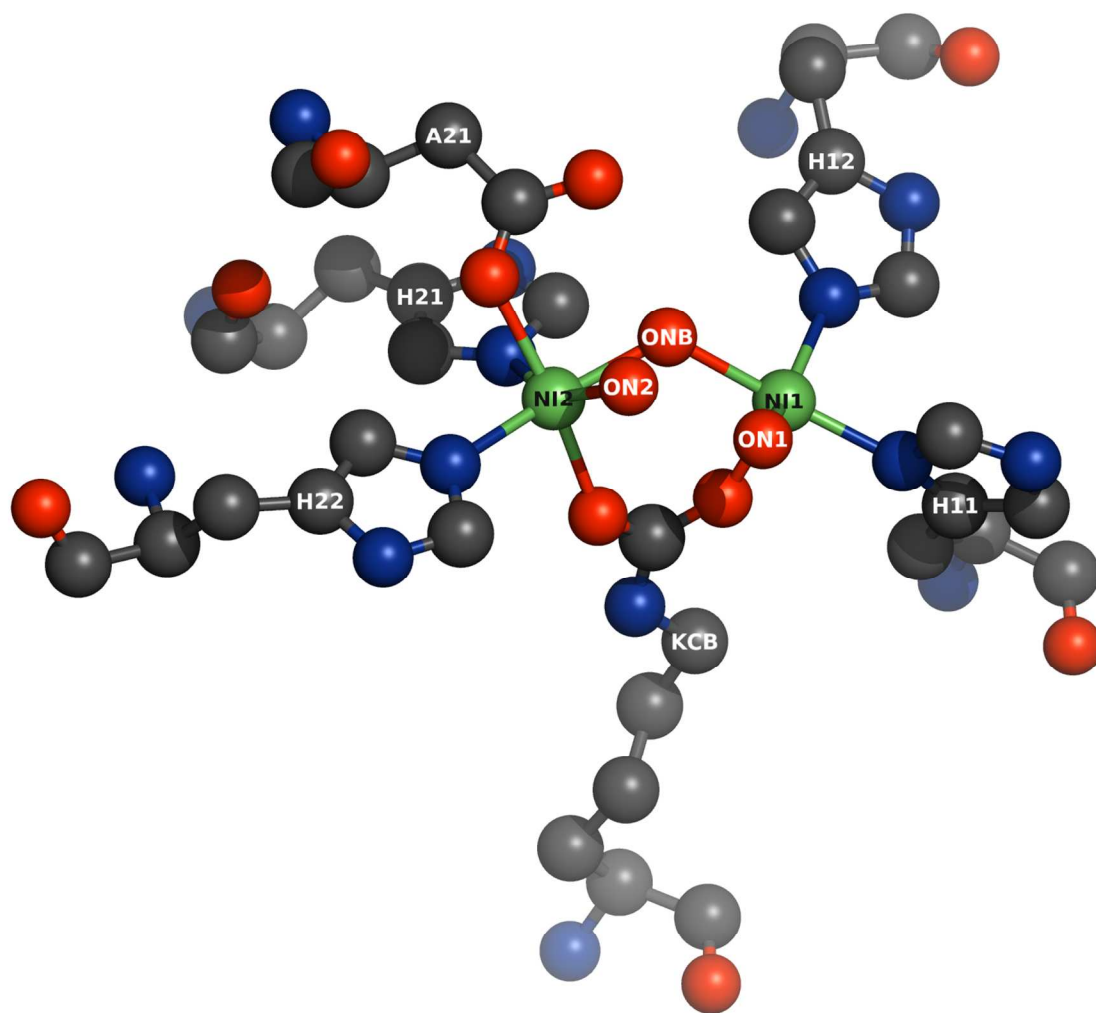

Figure 1. Our names for the residues forming part of the dinickel cluster in the urease active site.

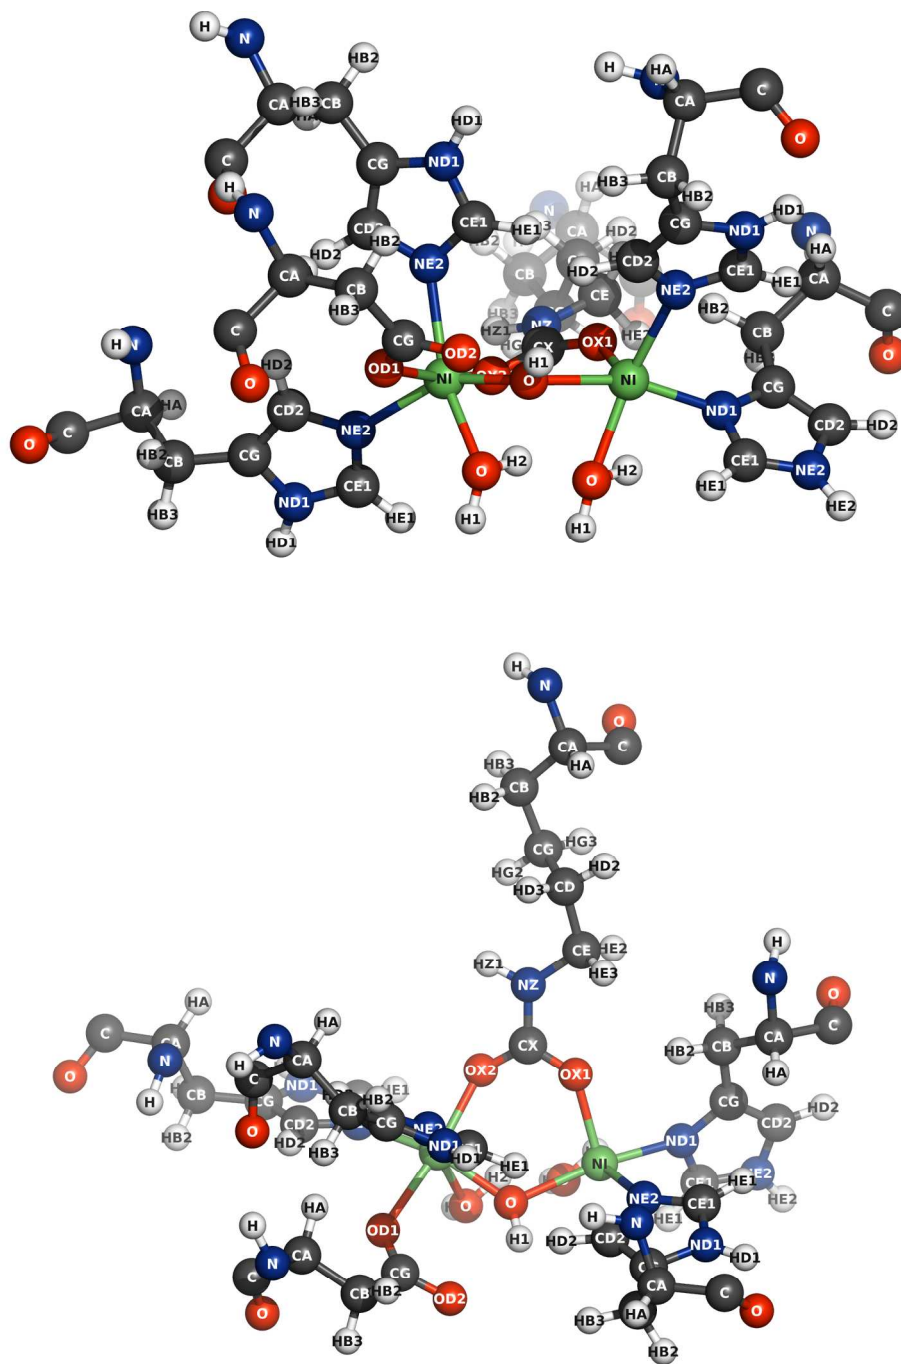

Figure 2. Atom names in the dinickel cluster. The cluster is shown from two different vantage points so that every atom may be seen clearly.

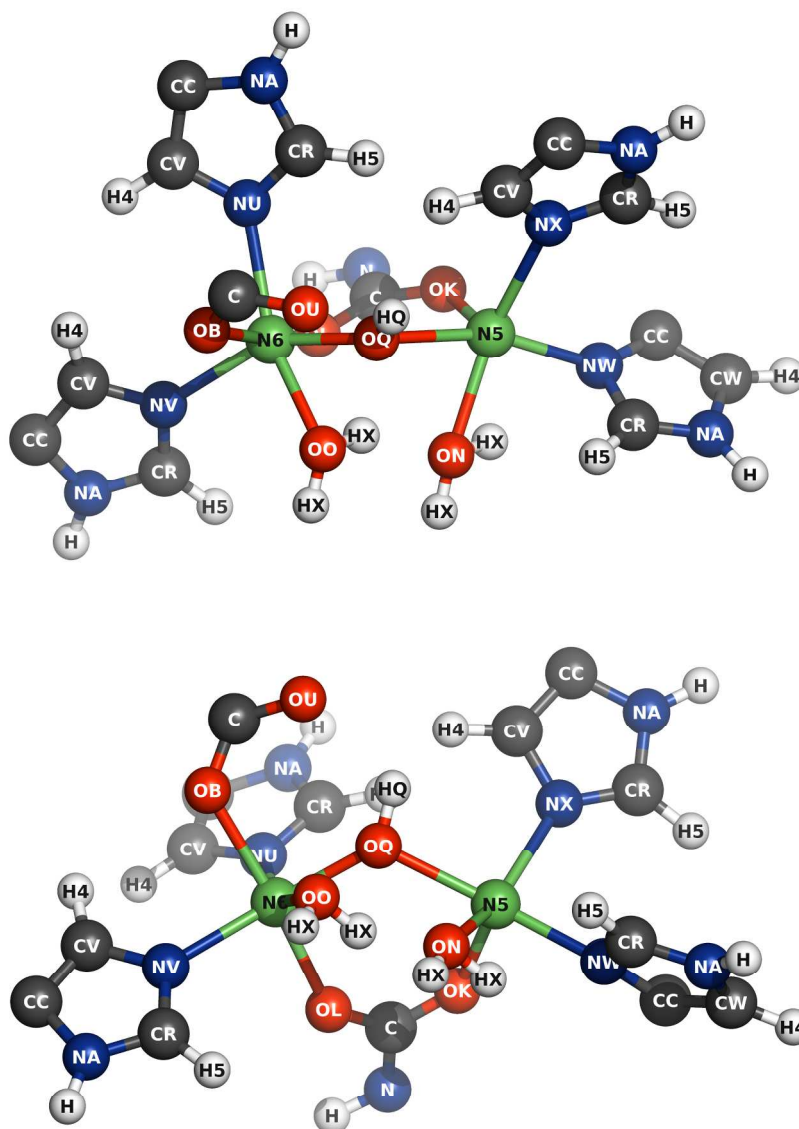

Figure 3. Atom types in the dinickel cluster. The cluster is shown from two different vantage points so that every atom may be seen clearly. Only the atoms with custom types and their immediate neighbours are shown. For other atoms, the conventional Amber types for the corresponding standard amino acid residues were used.

Table 1. Additional atom types, masses, and Lennard-Jones parameters.

| Atom type | Element | Mass (u) | $\sigma$ (Å) | $\epsilon$ (kcal mol <sup>-1</sup> ) |
|-----------|---------|----------|--------------|--------------------------------------|
| HQ        | H       | 1.008    | 0.60         | 0.0157                               |
| HX        | H       | 1.008    | 0.60         | 0.0157                               |
| N5        | Ni      | 58.693   | 0.00         | 0.0000                               |
| N6        | Ni      | 58.693   | 0.00         | 0.0000                               |
| NU        | N       | 14.010   | 1.82         | 0.1700                               |
| NV        | N       | 14.010   | 1.82         | 0.1700                               |
| NW        | N       | 14.010   | 1.82         | 0.1700                               |
| NX        | N       | 14.010   | 1.82         | 0.1700                               |
| OB        | O       | 16.000   | 1.66         | 0.2100                               |
| OK        | O       | 16.000   | 1.66         | 0.2100                               |
| OL        | O       | 16.000   | 1.66         | 0.2100                               |
| ON        | O       | 16.000   | 1.78         | 0.1550                               |
| OO        | O       | 16.000   | 1.78         | 0.1550                               |
| OQ        | O       | 16.000   | 1.72         | 0.2100                               |
| OU        | O       | 16.000   | 1.66         | 0.2100                               |

Table 2. Bond parameters.

| Bond type | $k$ (kcal mol <sup>-1</sup> Å <sup>-2</sup> ) | $r_0$ (Å) |
|-----------|-----------------------------------------------|-----------|
| C—OB      | 656.00                                        | 1.250     |
| C—OK      | 656.00                                        | 1.250     |
| C—OL      | 656.00                                        | 1.250     |
| C—OQ      | 450.00                                        | 1.364     |
| C—OU      | 656.00                                        | 1.250     |
| CA—OQ     | 450.00                                        | 1.364     |
| CB—NU     | 414.00                                        | 1.391     |
| CB—NV     | 414.00                                        | 1.391     |
| CB—NW     | 414.00                                        | 1.391     |
| CB—NX     | 414.00                                        | 1.391     |
| CC—NU     | 410.00                                        | 1.394     |
| CC—NV     | 410.00                                        | 1.394     |
| CC—NW     | 410.00                                        | 1.394     |
| CC—NX     | 410.00                                        | 1.394     |
| CK—NU     | 529.00                                        | 1.304     |
| CK—NV     | 529.00                                        | 1.304     |
| CK—NW     | 529.00                                        | 1.304     |
| CK—NX     | 529.00                                        | 1.304     |
| CR—NU     | 488.00                                        | 1.335     |
| CR—NV     | 488.00                                        | 1.335     |
| CR—NW     | 488.00                                        | 1.335     |
| CR—NX     | 488.00                                        | 1.335     |
| CT—OQ     | 320.00                                        | 1.410     |



| Bond type | $k$ (kcal mol <sup>-1</sup> Å <sup>-2</sup> ) | $r_0$ (Å) |
|-----------|-----------------------------------------------|-----------|
| CV—NU     | 410.00                                        | 1.394     |
| CV—NV     | 410.00                                        | 1.394     |
| CV—NW     | 410.00                                        | 1.394     |
| CV—NX     | 410.00                                        | 1.394     |
| HQ—OQ     | 553.00                                        | 0.960     |
| HX—ON     | 529.58                                        | 1.012     |
| HX—OO     | 529.58                                        | 1.012     |
| LP—NU     | 600.00                                        | 0.200     |
| LP—NV     | 600.00                                        | 0.200     |
| LP—NW     | 600.00                                        | 0.200     |
| LP—NX     | 600.00                                        | 0.200     |
| LP—OQ     | 600.00                                        | 0.200     |
| N5—NW     | 60.63                                         | 2.149     |
| N5—NX     | 70.80                                         | 2.113     |
| N5—OK     | 83.45                                         | 2.022     |
| N5—ON     | 59.88                                         | 2.141     |
| N5—OQ     | 136.15                                        | 1.928     |
| N6—NU     | 67.53                                         | 2.127     |
| N6—NV     | 74.66                                         | 2.099     |
| N6—OB     | 107.84                                        | 2.087     |
| N6—OL     | 40.79                                         | 2.194     |
| N6—OO     | 52.57                                         | 2.203     |
| N6—OQ     | 107.56                                        | 2.042     |
| OB—P      | 525.00                                        | 1.480     |

| <b>Bond type</b> | <b><math>k</math> (kcal mol<sup>-1</sup> Å<sup>-2</sup>)</b> | <b><math>r_0</math> (Å)</b> |
|------------------|--------------------------------------------------------------|-----------------------------|
| OK—P             | 525.00                                                       | 1.480                       |
| OL—P             | 525.00                                                       | 1.480                       |
| OQ—P             | 230.00                                                       | 1.610                       |
| OU—P             | 525.00                                                       | 1.480                       |

Table 3. Angle parameters.

| Angle type | $k_{\theta}$ (kcal mol <sup>-1</sup> rad <sup>-2</sup> ) | $\theta_0$ (°) |
|------------|----------------------------------------------------------|----------------|
| C—C—OQ     | 80.00                                                    | 120.00         |
| CA—C—OQ    | 70.00                                                    | 120.00         |
| CT—C—OQ    | 80.00                                                    | 110.00         |
| CT—C—OB    | 70.00                                                    | 117.00         |
| CT—C—OK    | 70.00                                                    | 117.00         |
| CT—C—OL    | 70.00                                                    | 117.00         |
| CT—C—OU    | 70.00                                                    | 117.00         |
| H4—C—OQ    | 50.00                                                    | 120.00         |
| H5—C—OQ    | 50.00                                                    | 107.00         |
| N—C—OK     | 126.78                                                   | 117.86         |
| N—C—OL     | 130.62                                                   | 116.74         |
| O—C—OQ     | 80.00                                                    | 120.00         |
| OB—C—OB    | 80.00                                                    | 126.00         |
| OB—C—OU    | 140.26                                                   | 125.55         |
| OK—C—OK    | 80.00                                                    | 126.00         |
| OK—C—OL    | 121.98                                                   | 125.34         |
| OL—C—OL    | 80.00                                                    | 126.00         |
| OU—C—OU    | 80.00                                                    | 126.00         |
| CA—CA—OQ   | 70.00                                                    | 120.00         |
| C—CB—NW    | 70.00                                                    | 130.00         |
| C—CB—NV    | 70.00                                                    | 130.00         |
| C—CB—NU    | 70.00                                                    | 130.00         |
| C—CB—NX    | 70.00                                                    | 130.00         |

| Angle type | $k_{\theta}$ (kcal mol <sup>-1</sup> rad <sup>-2</sup> ) | $\theta_0$ (°) |
|------------|----------------------------------------------------------|----------------|
| CA—CB—NW   | 70.00                                                    | 132.40         |
| CA—CB—NV   | 70.00                                                    | 132.40         |
| CA—CB—NU   | 70.00                                                    | 132.40         |
| CA—CB—NX   | 70.00                                                    | 132.40         |
| CB—CB—NW   | 70.00                                                    | 110.40         |
| CB—CB—NV   | 70.00                                                    | 110.40         |
| CB—CB—NU   | 70.00                                                    | 110.40         |
| CB—CB—NX   | 70.00                                                    | 110.40         |
| CT—CC—NX   | 70.00                                                    | 120.00         |
| CT—CC—NU   | 70.00                                                    | 120.00         |
| CT—CC—NV   | 70.00                                                    | 120.00         |
| CT—CC—NW   | 70.00                                                    | 120.00         |
| CW—CC—NX   | 70.00                                                    | 120.00         |
| CW—CC—NU   | 70.00                                                    | 120.00         |
| CW—CC—NV   | 70.00                                                    | 120.00         |
| CW—CC—NW   | 70.00                                                    | 120.00         |
| H5—CK—NV   | 50.00                                                    | 123.05         |
| H5—CK—NU   | 50.00                                                    | 123.05         |
| H5—CK—NW   | 50.00                                                    | 123.05         |
| H5—CK—NX   | 50.00                                                    | 123.05         |
| N*—CK—NV   | 70.00                                                    | 113.90         |
| N*—CK—NU   | 70.00                                                    | 113.90         |
| N*—CK—NX   | 70.00                                                    | 113.90         |
| N*—CK—NW   | 70.00                                                    | 113.90         |

| Angle type | $k_{\theta}$ (kcal mol <sup>-1</sup> rad <sup>-2</sup> ) | $\theta_0$ (°) |
|------------|----------------------------------------------------------|----------------|
| H5—CR—NX   | 50.00                                                    | 120.00         |
| H5—CR—NU   | 50.00                                                    | 120.00         |
| H5—CR—NV   | 50.00                                                    | 120.00         |
| H5—CR—NW   | 50.00                                                    | 120.00         |
| NA—CR—NX   | 70.00                                                    | 120.00         |
| NA—CR—NU   | 70.00                                                    | 120.00         |
| NA—CR—NV   | 70.00                                                    | 120.00         |
| NA—CR—NW   | 70.00                                                    | 120.00         |
| H1—CT—OQ   | 50.00                                                    | 109.50         |
| HC—CT—N    | 50.00                                                    | 109.50         |
| CT—CT—OQ   | 50.00                                                    | 109.50         |
| CC—CV—NW   | 70.00                                                    | 120.00         |
| CC—CV—NU   | 70.00                                                    | 120.00         |
| CC—CV—NV   | 70.00                                                    | 120.00         |
| CC—CV—NX   | 70.00                                                    | 120.00         |
| H4—CV—NW   | 50.00                                                    | 120.00         |
| H4—CV—NU   | 50.00                                                    | 120.00         |
| H4—CV—NX   | 50.00                                                    | 120.00         |
| H4—CV—NV   | 50.00                                                    | 120.00         |
| HX—HX—ON   | 0.00                                                     | 33.38          |
| HX—HX—OO   | 0.00                                                     | 33.38          |
| NW—N5—NX   | 61.42                                                    | 90.10          |
| NW—N5—OQ   | 41.30                                                    | 153.90         |
| NW—N5—ON   | 60.35                                                    | 87.55          |

| Angle type | $k_{\theta}$ (kcal mol <sup>-1</sup> rad <sup>-2</sup> ) | $\theta_0$ (°) |
|------------|----------------------------------------------------------|----------------|
| NW—N5—OK   | 57.25                                                    | 100.82         |
| NX—N5—OK   | 56.14                                                    | 98.61          |
| NX—N5—OQ   | 51.72                                                    | 95.16          |
| NX—N5—ON   | 55.10                                                    | 170.30         |
| OK—N5—ON   | 53.15                                                    | 91.08          |
| OK—N5—OQ   | 31.31                                                    | 103.61         |
| ON—N5—OQ   | 55.74                                                    | 82.99          |
| NU—N6—OL   | 53.17                                                    | 92.42          |
| NU—N6—OB   | 54.52                                                    | 93.41          |
| NU—N6—OQ   | 62.91                                                    | 101.42         |
| NU—N6—OO   | 50.67                                                    | 173.86         |
| NU—N6—NV   | 51.57                                                    | 93.09          |
| NV—N6—OL   | 43.60                                                    | 89.63          |
| NV—N6—OB   | 69.52                                                    | 90.41          |
| NV—N6—OQ   | 53.79                                                    | 165.37         |
| NV—N6—OO   | 48.89                                                    | 89.03          |
| OB—N6—OL   | 50.49                                                    | 174.16         |
| OB—N6—OO   | 49.98                                                    | 80.80          |
| OB—N6—OQ   | 67.00                                                    | 90.54          |
| OL—N6—OO   | 50.11                                                    | 93.36          |
| OL—N6—OQ   | 34.52                                                    | 87.95          |
| OO—N6—OQ   | 62.89                                                    | 76.71          |
| CB—NU—CK   | 70.00                                                    | 103.80         |
| CB—NU—LP   | 50.00                                                    | 126.00         |

| Angle type | $k_{\theta}$ (kcal mol <sup>-1</sup> rad <sup>-2</sup> ) | $\theta_0$ (°) |
|------------|----------------------------------------------------------|----------------|
| CC—NU—LP   | 50.00                                                    | 126.00         |
| CC—NU—CR   | 70.00                                                    | 117.00         |
| CK—NU—LP   | 50.00                                                    | 126.00         |
| CR—NU—CV   | 70.00                                                    | 117.00         |
| CR—NU—N6   | 71.60                                                    | 124.90         |
| CR—NU—LP   | 50.00                                                    | 126.00         |
| CV—NU—LP   | 50.00                                                    | 126.00         |
| CV—NU—N6   | 71.79                                                    | 128.37         |
| CB—NV—CK   | 70.00                                                    | 103.80         |
| CB—NV—LP   | 50.00                                                    | 126.00         |
| CC—NV—LP   | 50.00                                                    | 126.00         |
| CC—NV—CR   | 70.00                                                    | 117.00         |
| CK—NV—LP   | 50.00                                                    | 126.00         |
| CR—NV—CV   | 70.00                                                    | 117.00         |
| CR—NV—LP   | 50.00                                                    | 126.00         |
| CR—NV—N6   | 75.38                                                    | 125.86         |
| CV—NV—LP   | 50.00                                                    | 126.00         |
| CV—NV—N6   | 76.59                                                    | 126.76         |
| CB—NW—CK   | 70.00                                                    | 103.80         |
| CB—NW—LP   | 50.00                                                    | 126.00         |
| CC—NW—CR   | 70.00                                                    | 117.00         |
| CC—NW—LP   | 50.00                                                    | 126.00         |
| CC—NW—N5   | 98.53                                                    | 132.82         |
| CK—NW—LP   | 50.00                                                    | 126.00         |

| Angle type | $k_{\theta}$ (kcal mol <sup>-1</sup> rad <sup>-2</sup> ) | $\theta_0$ (°) |
|------------|----------------------------------------------------------|----------------|
| CR—NW—CV   | 70.00                                                    | 117.00         |
| CR—NW—LP   | 50.00                                                    | 126.00         |
| CR—NW—N5   | 93.90                                                    | 120.06         |
| CV—NW—LP   | 50.00                                                    | 126.00         |
| CB—NX—CK   | 70.00                                                    | 103.80         |
| CB—NX—LP   | 50.00                                                    | 126.00         |
| CC—NX—CR   | 70.00                                                    | 117.00         |
| CC—NX—LP   | 50.00                                                    | 126.00         |
| CK—NX—LP   | 50.00                                                    | 126.00         |
| CR—NX—CV   | 70.00                                                    | 117.00         |
| CR—NX—LP   | 50.00                                                    | 126.00         |
| CR—NX—N5   | 75.95                                                    | 124.52         |
| CV—NX—LP   | 50.00                                                    | 126.00         |
| CV—NX—N5   | 75.69                                                    | 128.87         |
| C—OB—N6    | 99.84                                                    | 124.88         |
| C—OK—N5    | 85.19                                                    | 119.16         |
| C—OL—N6    | 68.61                                                    | 118.74         |
| HX—ON—HX   | 37.95                                                    | 113.24         |
| HX—ON—N5   | 35.32                                                    | 104.60         |
| HX—OO—HX   | 37.95                                                    | 113.24         |
| HX—OO—N6   | 22.15                                                    | 87.20          |
| C—OQ—HQ    | 50.00                                                    | 113.00         |
| C—OQ—LP    | 50.00                                                    | 120.00         |
| CA—OQ—HQ   | 50.00                                                    | 113.00         |



| Angle type | $k_{\theta}$ (kcal mol <sup>-1</sup> rad <sup>-2</sup> ) | $\theta_0$ (°) |
|------------|----------------------------------------------------------|----------------|
| CT—OQ—HQ   | 55.00                                                    | 108.50         |
| CT—OQ—LP   | 50.00                                                    | 109.50         |
| HQ—OQ—LP   | 50.00                                                    | 109.50         |
| HQ—OQ—N5   | 34.81                                                    | 122.26         |
| HQ—OQ—N6   | 36.01                                                    | 99.45          |
| HQ—OQ—P    | 45.00                                                    | 108.50         |
| LP—OQ—LP   | 50.00                                                    | 109.50         |
| N5—OQ—N6   | 77.28                                                    | 122.68         |
| O2—P—OQ    | 45.00                                                    | 108.23         |
| OB—P—OB    | 40.00                                                    | 119.90         |
| OB—P—OH    | 45.00                                                    | 108.23         |
| OB—P—OQ    | 45.00                                                    | 108.23         |
| OB—P—OS    | 0.00                                                     | 108.23         |
| OH—P—OK    | 45.00                                                    | 108.23         |
| OH—P—OL    | 45.00                                                    | 108.23         |
| OH—P—OU    | 45.00                                                    | 108.23         |
| OK—P—OK    | 40.00                                                    | 119.90         |
| OK—P—OQ    | 45.00                                                    | 108.23         |
| OK—P—OS    | 0.00                                                     | 108.23         |
| OL—P—OL    | 40.00                                                    | 119.90         |
| OL—P—OQ    | 45.00                                                    | 108.23         |
| OL—P—OS    | 0.00                                                     | 108.23         |
| OQ—P—OS    | 45.00                                                    | 102.60         |
| OQ—P—OU    | 45.00                                                    | 108.23         |

| <b>Angle type</b> | <b><math>k_{\theta}</math> (kcal mol<sup>-1</sup> rad<sup>-2</sup>)</b> | <b><math>\theta_0</math> (°)</b> |
|-------------------|-------------------------------------------------------------------------|----------------------------------|
| OS—P—OU           | 0.00                                                                    | 108.23                           |
| OU—P—OU           | 40.00                                                                   | 119.90                           |

Table 4. Proper dihedral parameters. Torsions whose parameters are neither given in this table nor specified in the default FF99SB force field, principally those involving one of the nickel ions, had no barrier associated with them.

| Dihedral type | Scaling | $V$ (kcal mol <sup>-1</sup> ) | Phase (°) | Periodicity |
|---------------|---------|-------------------------------|-----------|-------------|
| O—C—OQ—HQ     | 1       | 1.900                         | 0.0       | 1           |
| O—C—OQ—HQ     | 1       | 2.300                         | 180.0     | 2           |
| X—C—OQ—X      | 2       | 4.600                         | 180.0     | 2           |
| X—CA—OQ—X     | 2       | 1.800                         | 180.0     | 2           |
| X—CB—NU—X     | 2       | 5.100                         | 180.0     | 2           |
| X—CB—NV—X     | 2       | 5.100                         | 180.0     | 2           |
| X—CB—NW—X     | 2       | 5.100                         | 180.0     | 2           |
| X—CB—NX—X     | 2       | 5.100                         | 180.0     | 2           |
| X—CC—NU—X     | 2       | 4.800                         | 180.0     | 2           |
| X—CC—NV—X     | 2       | 4.800                         | 180.0     | 2           |
| X—CC—NW—X     | 2       | 4.800                         | 180.0     | 2           |
| X—CC—NX—X     | 2       | 4.800                         | 180.0     | 2           |
| X—CK—NU—X     | 2       | 20.000                        | 180.0     | 2           |
| X—CK—NV—X     | 2       | 20.000                        | 180.0     | 2           |
| X—CK—NW—X     | 2       | 20.000                        | 180.0     | 2           |
| X—CK—NX—X     | 2       | 20.000                        | 180.0     | 2           |
| X—CR—NU—X     | 2       | 10.000                        | 180.0     | 2           |
| X—CR—NV—X     | 2       | 10.000                        | 180.0     | 2           |
| X—CR—NW—X     | 2       | 10.000                        | 180.0     | 2           |
| X—CR—NX—X     | 2       | 10.000                        | 180.0     | 2           |
| H1—CT—CT—OQ   | 1       | 0.250                         | 0.0       | 1           |
| HC—CT—CT—OQ   | 1       | 0.250                         | 0.0       | 1           |

| Dihedral type | Scaling | $V$ (kcal mol <sup>-1</sup> ) | Phase (°) | Periodicity |
|---------------|---------|-------------------------------|-----------|-------------|
| OQ—CT—CT—OQ   | 1       | 1.175                         | 0.0       | 2           |
| OQ—CT—CT—OQ   | 1       | 0.144                         | 0.0       | 3           |
| OQ—CT—CT—OS   | 1       | 1.175                         | 0.0       | 2           |
| OQ—CT—CT—OS   | 1       | 0.144                         | 0.0       | 3           |
| CT—CT—OQ—HQ   | 1       | 0.250                         | 0.0       | 1           |
| CT—CT—OQ—HQ   | 1       | 0.160                         | 0.0       | 3           |
| X—CT—OQ—X     | 3       | 0.500                         | 0.0       | 3           |
| X—CV—NU—X     | 2       | 4.800                         | 180.0     | 2           |
| X—CV—NV—X     | 2       | 4.800                         | 180.0     | 2           |
| X—CV—NW—X     | 2       | 4.800                         | 180.0     | 2           |
| X—CV—NX—X     | 2       | 4.800                         | 180.0     | 2           |
| X—OQ—P—X      | 3       | 0.750                         | 0.0       | 3           |
| CT—OS—P—OQ    | 1       | 1.200                         | 0.0       | 2           |
| CT—OS—P—OQ    | 1       | 0.250                         | 0.0       | 3           |

Table 5. Improper dihedral parameters.

| <b>Improper dihedral type</b> | <b>V (kcal mol<sup>-1</sup>)</b> | <b>Phase (°)</b> | <b>Periodicity</b> |
|-------------------------------|----------------------------------|------------------|--------------------|
| CA—CA—C—OQ                    | 1.100                            | 180.0            | 2                  |
| CT—O—C—OQ                     | 10.500                           | 180.0            | 2                  |
| H5—O—C—OQ                     | 1.100                            | 180.0            | 2                  |
| X—OB—C—OB                     | 10.500                           | 180.0            | 2                  |
| X—OK—C—OK                     | 10.500                           | 180.0            | 2                  |
| X—OL—C—OL                     | 10.500                           | 180.0            | 2                  |
| X—OU—C—OU                     | 10.500                           | 180.0            | 2                  |
| CA—CA—CA—OQ                   | 1.100                            | 180.0            | 2                  |
| CT—CW—CC—NU                   | 1.100                            | 180.0            | 2                  |
| CT—CW—CC—NV                   | 1.100                            | 180.0            | 2                  |
| CT—CW—CC—NW                   | 1.100                            | 180.0            | 2                  |
| CT—CW—CC—NX                   | 1.100                            | 180.0            | 2                  |

Table 6. Atomic partial charges.

| <b>Residue</b> | <b>Element</b> | <b>Atom name</b> | <b>Partial charge (e)</b> |
|----------------|----------------|------------------|---------------------------|
| NI1            | Ni             | NI               | 1.27465                   |
| NI2            | Ni             | NI               | 0.27155                   |
| A21            | N              | N                | -0.51630                  |
| A21            | H              | H                | 0.29360                   |
| A21            | C              | CA               | 0.03810                   |
| A21            | H              | HA               | 0.08800                   |
| A21            | C              | CB               | 0.13092                   |
| A21            | H              | HB2              | -0.00456                  |
| A21            | H              | HB3              | -0.00456                  |
| A21            | C              | CG               | 0.60604                   |
| A21            | O              | OD1              | -0.45860                  |
| A21            | O              | OD2              | -0.65369                  |
| A21            | C              | C                | 0.53660                   |
| A21            | O              | O                | -0.58190                  |
| H11            | N              | N                | -0.41570                  |
| H11            | H              | H                | 0.27190                   |
| H11            | C              | CA               | -0.05810                  |
| H11            | H              | HA               | 0.13600                   |
| H11            | C              | CB               | 0.14676                   |
| H11            | H              | HB2              | 0.02306                   |
| H11            | H              | HB3              | 0.02306                   |
| H11            | C              | CG               | 0.13059                   |
| H11            | N              | ND1              | -0.49302                  |

| <b>Residue</b> | <b>Element</b> | <b>Atom name</b> | <b>Partial charge (e)</b> |
|----------------|----------------|------------------|---------------------------|
| H11            | C              | CE1              | 0.00072                   |
| H11            | H              | HE1              | 0.11114                   |
| H11            | N              | NE2              | -0.06355                  |
| H11            | H              | HE2              | 0.30639                   |
| H11            | C              | CD2              | -0.25264                  |
| H11            | H              | HD2              | 0.22361                   |
| H11            | C              | C                | 0.59730                   |
| H11            | O              | O                | -0.56790                  |
| H12            | N              | N                | -0.41570                  |
| H12            | H              | H                | 0.27190                   |
| H12            | C              | CA               | 0.01880                   |
| H12            | H              | HA               | 0.08810                   |
| H12            | C              | CB               | 0.08143                   |
| H12            | H              | HB2              | 0.00676                   |
| H12            | H              | HB3              | 0.00676                   |
| H12            | C              | CG               | 0.06831                   |
| H12            | N              | ND1              | -0.20358                  |
| H12            | H              | HD1              | 0.38070                   |
| H12            | C              | CE1              | 0.14467                   |
| H12            | H              | HE1              | 0.06255                   |
| H12            | N              | NE2              | -0.50629                  |
| H12            | C              | CD2              | -0.05762                  |
| H12            | H              | HD2              | 0.10469                   |
| H12            | C              | C                | 0.59730                   |

| <b>Residue</b> | <b>Element</b> | <b>Atom name</b> | <b>Partial charge (e)</b> |
|----------------|----------------|------------------|---------------------------|
| H12            | O              | O                | -0.56790                  |
| H21            | N              | N                | -0.41570                  |
| H21            | H              | H                | 0.27190                   |
| H21            | C              | CA               | 0.01880                   |
| H21            | H              | HA               | 0.08810                   |
| H21            | C              | CB               | 0.03928                   |
| H21            | H              | HB2              | 0.01718                   |
| H21            | H              | HB3              | 0.01718                   |
| H21            | C              | CG               | -0.00577                  |
| H21            | N              | ND1              | -0.18614                  |
| H21            | H              | HD1              | 0.29486                   |
| H21            | C              | CE1              | 0.02593                   |
| H21            | H              | HE1              | 0.17862                   |
| H21            | N              | NE2              | 0.00636                   |
| H21            | C              | CD2              | -0.29529                  |
| H21            | H              | HD2              | 0.24205                   |
| H21            | C              | C                | 0.59730                   |
| H21            | O              | O                | -0.56790                  |
| H22            | N              | N                | -0.41570                  |
| H22            | H              | H                | 0.27190                   |
| H22            | C              | CA               | 0.01880                   |
| H22            | H              | HA               | 0.08810                   |
| H22            | C              | CB               | 0.01769                   |
| H22            | H              | HB2              | 0.06181                   |



| <b>Residue</b> | <b>Element</b> | <b>Atom name</b> | <b>Partial charge (e)</b> |
|----------------|----------------|------------------|---------------------------|
| H22            | H              | HB3              | 0.06181                   |
| H22            | C              | CG               | -0.02373                  |
| H22            | N              | ND1              | -0.22596                  |
| H22            | H              | HD1              | 0.32242                   |
| H22            | C              | CE1              | -0.07437                  |
| H22            | H              | HE1              | 0.17627                   |
| H22            | N              | NE2              | -0.09067                  |
| H22            | C              | CD2              | 0.02037                   |
| H22            | H              | HD2              | 0.03997                   |
| H22            | C              | C                | 0.59730                   |
| H22            | O              | O                | -0.56790                  |
| KCB            | N              | N                | -0.34790                  |
| KCB            | H              | H                | 0.27470                   |
| KCB            | C              | CA               | -0.24000                  |
| KCB            | H              | HA               | 0.14260                   |
| KCB            | C              | CB               | -0.10064                  |
| KCB            | H              | HB2              | 0.07462                   |
| KCB            | H              | HB3              | 0.07462                   |
| KCB            | C              | CG               | -0.03603                  |
| KCB            | H              | HG2              | 0.03394                   |
| KCB            | H              | HG3              | 0.03394                   |
| KCB            | C              | CD               | -0.11262                  |
| KCB            | H              | HD2              | 0.06026                   |
| KCB            | H              | HD3              | 0.06026                   |

| <b>Residue</b> | <b>Element</b> | <b>Atom name</b>       | <b>Partial charge (e)</b> |
|----------------|----------------|------------------------|---------------------------|
| KCB            | C              | CE                     | -0.07196                  |
| KCB            | H              | HE2                    | 0.07319                   |
| KCB            | H              | HE3                    | 0.07319                   |
| KCB            | N              | NZ                     | -0.23030                  |
| KCB            | H              | HZ1 (HZ in open flap)  | 0.24495                   |
| KCB            | C              | CX                     | 0.43426                   |
| KCB            | O              | OX1 (OQ1 in open flap) | -0.64076                  |
| KCB            | O              | OX2 (OQ2 in open flap) | -0.48356                  |
| KCB            | C              | C                      | 0.73410                   |
| KCB            | O              | O                      | -0.58940                  |
| ON1            | H              | H1                     | 0.38462                   |
| ON1            | O              | O                      | -0.67193                  |
| ON1            | H              | H2                     | 0.38462                   |
| ON2            | H              | H1                     | 0.28631                   |
| ON2            | O              | O                      | -0.34191                  |
| ON2            | H              | H2                     | 0.28631                   |
| ONB            | O              | O                      | -1.09258                  |
| ONB            | H              | H1                     | 0.47786                   |

Table 7. Composition of the closed-flap simulation.

| <i>Molecule or assembly</i> | <i>Number of instances</i> | <i>Number of atoms per instance</i> | <i>Total number of atoms</i> |
|-----------------------------|----------------------------|-------------------------------------|------------------------------|
| Protein                     | 1                          | 34,686                              | 34,686                       |
| Na <sup>+</sup>             | 318                        | 1                                   | 318                          |
| Cl <sup>-</sup>             | 246                        | 1                                   | 246                          |
| Water                       | 69,361                     | 3                                   | 208,083                      |
| <b>Total</b>                |                            |                                     | <b>243,333</b>               |

Table 8. Composition of the open-flap simulation.

| <i>Molecule or assembly</i> | <i>Number of instances</i> | <i>Number of atoms per instance</i> | <i>Total number of atoms</i> |
|-----------------------------|----------------------------|-------------------------------------|------------------------------|
| Protein                     | 1                          | 34,734                              | 34,734                       |
| Na <sup>+</sup>             | 318                        | 1                                   | 318                          |
| Cl <sup>-</sup>             | 243                        | 1                                   | 243                          |
| Water                       | 69,971                     | 3                                   | 209,913                      |
| <b>Total</b>                |                            |                                     | <b>245,208</b>               |

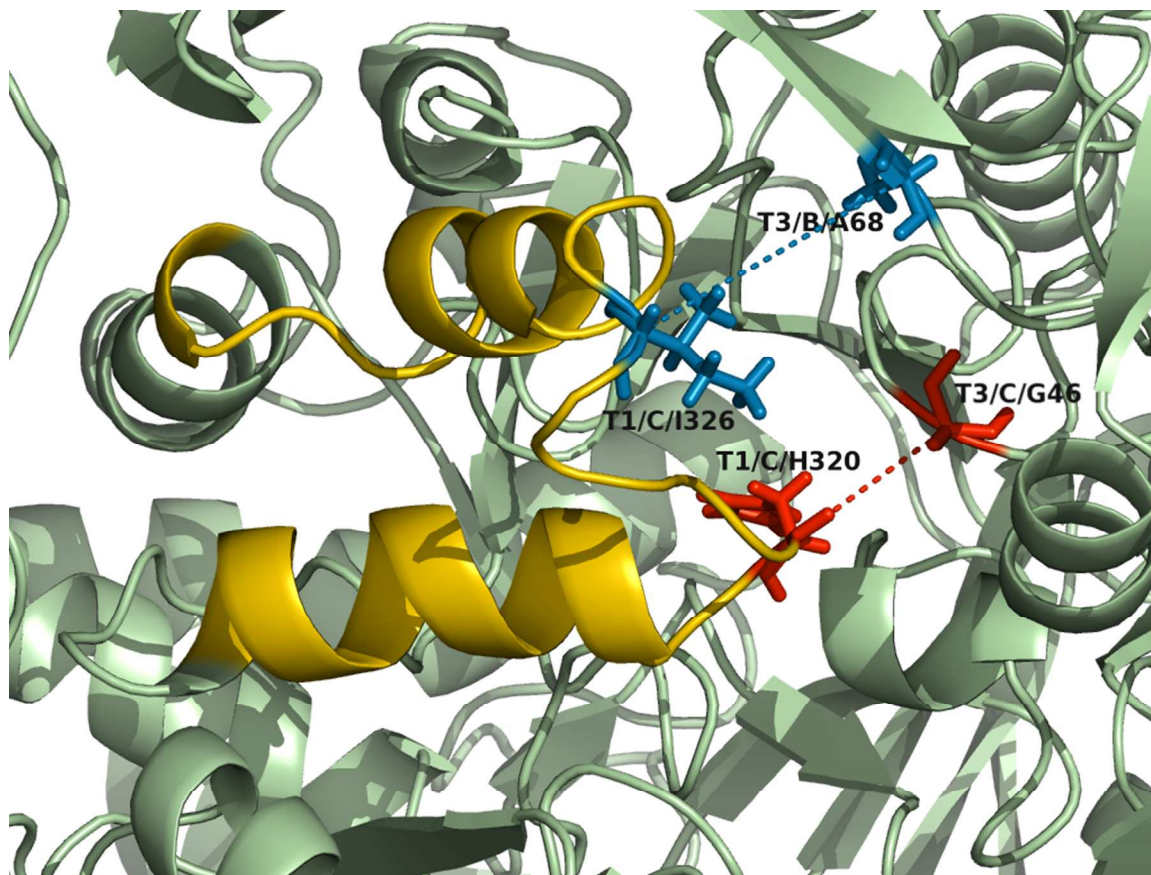

Figure 4. The two distances used to prepare the relative free energy map. Distances are measured between the carbon atoms of the indicated residues. The distance from H320 to G46 is  $r_{HG}$ , and that from I326 to A68 is  $r_{IA}$ .

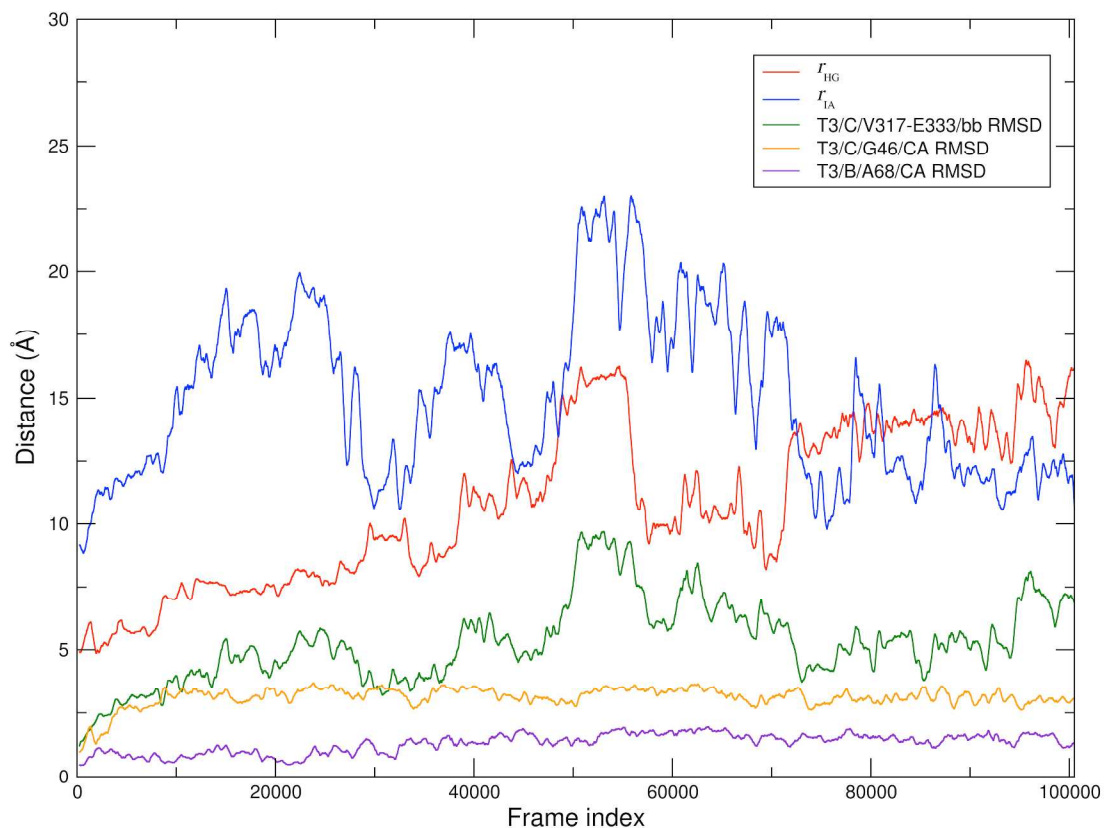

Figure 5. Comparison of the distances used to construct the relative free energy map with selected RMS deviations. The distances shown in this graph are (a)  $r_{HG}$ , (b)  $r_{IA}$  (see Figure 4), (c) the RMSD of the backbone atoms (carbonyl carbon,  $\alpha$  carbon, amide nitrogen) in residues V317 to E333 of chain C in trimer 3, comprising the flap that opens up into the wide-open conformation, and the RMSDs of the  $\alpha$  carbon atoms in (d) G46 of chain C in trimer 2 and (e) A68 of chain B in trimer 2. To reduce noise, the distances shown here are centered moving averages over 500 points.

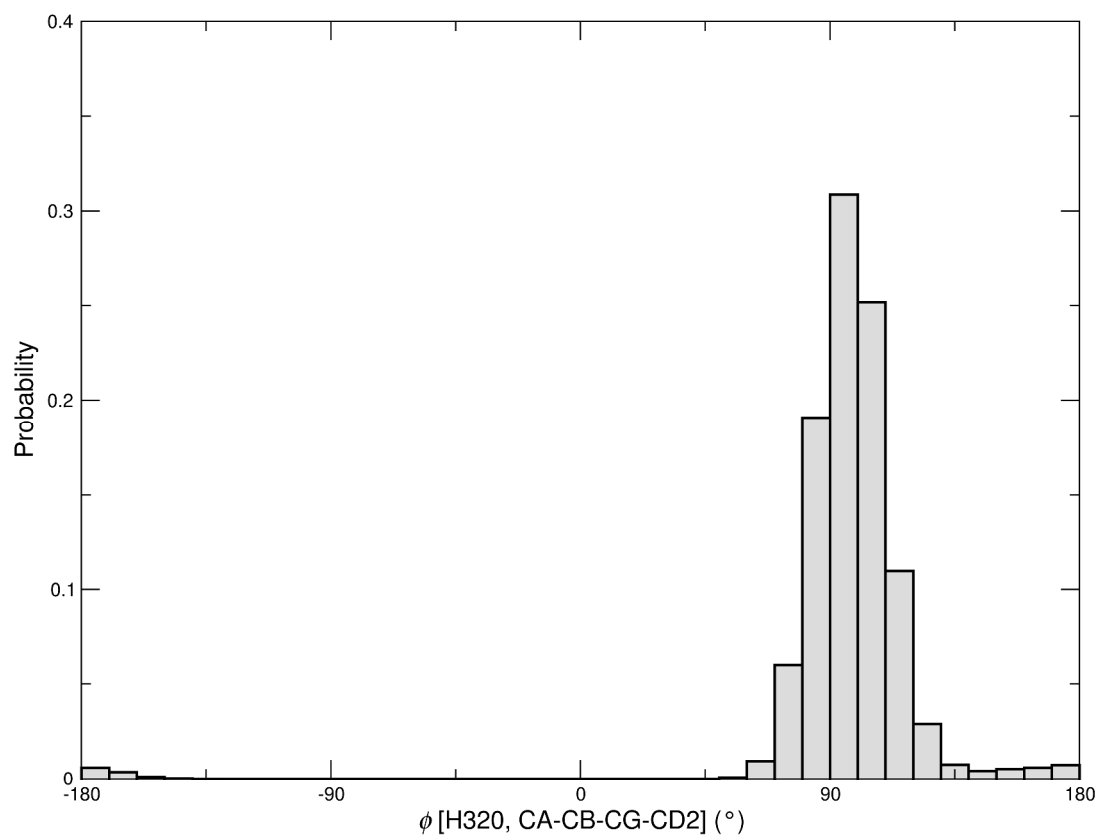

Figure 6. Distribution of the  $C_{\alpha}-C_{\beta}-C_{\gamma}-C_{\delta 2}$  dihedral angle of His 320 in a closed-flap situation. Snapshots were taken from the closed-flap simulation.

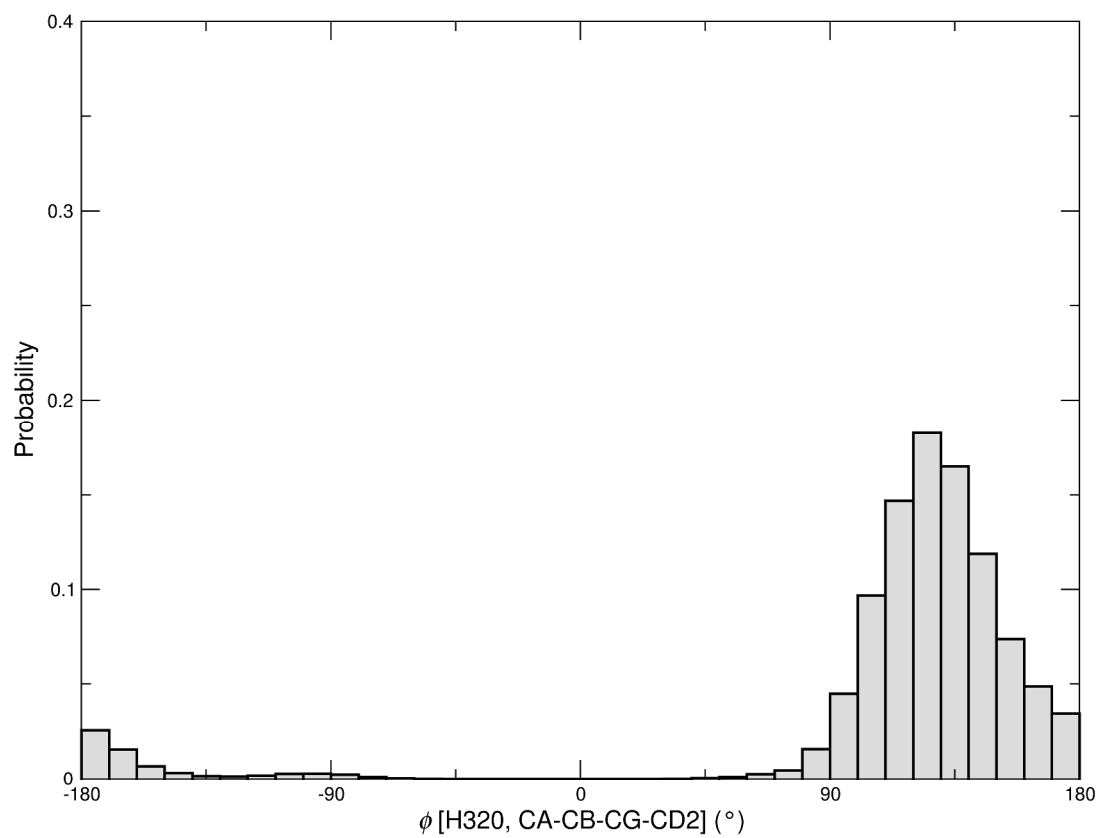

Figure 7. Distribution of the  $C_{\alpha}$ — $C_{\beta}$ — $C_{\gamma}$ — $C_{\delta 2}$  dihedral angle of His 320 in an open-flap situation. Snapshots were taken from the closed-flap simulation.

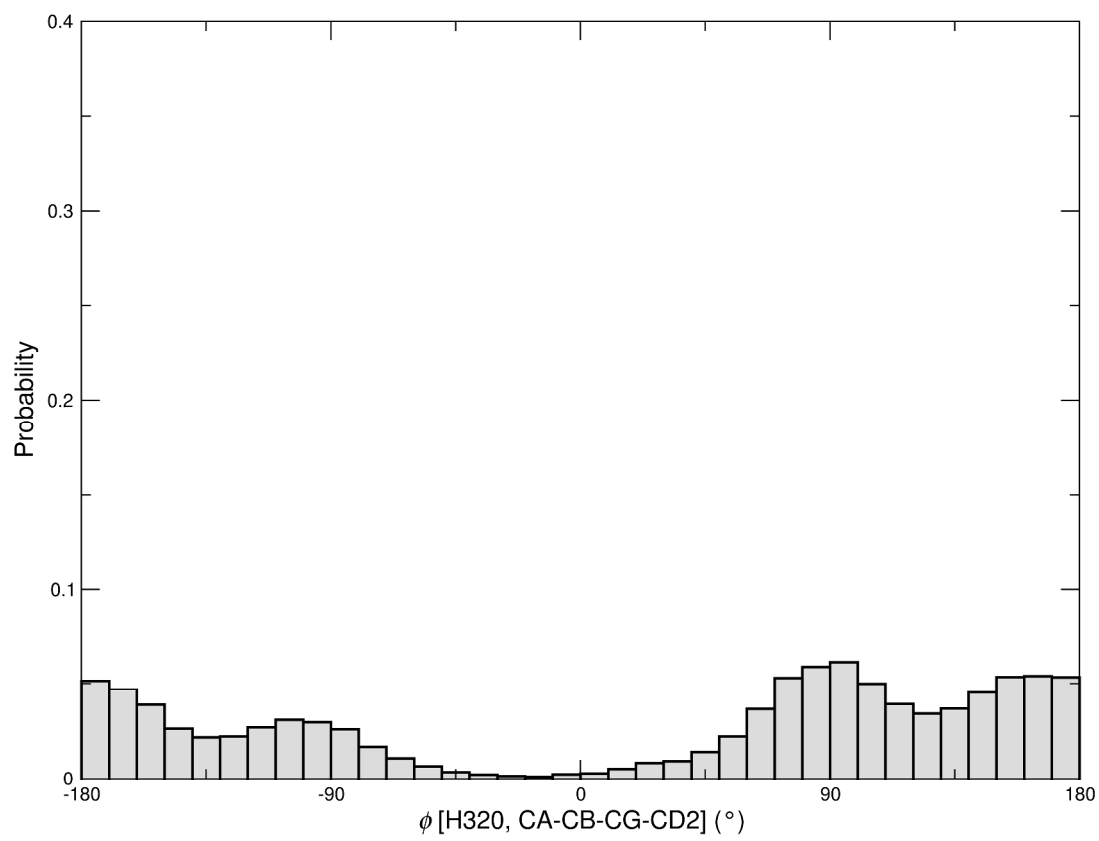

Figure 8. Distribution of the  $C_{\alpha}-C_{\beta}-C_{\gamma}-C_{\delta 2}$  dihedral angle of His 320 in a wide-open-flap situation. Snapshots were taken from the closed-flap simulation.



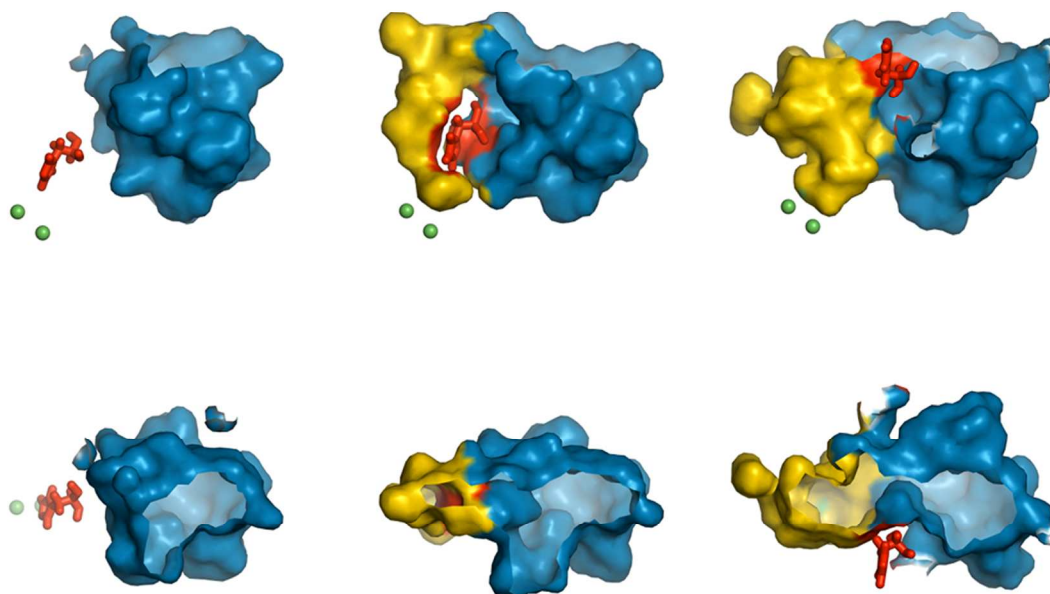

Figure 9. The position of the His 320 residue in the closed (left), open (centre) and wide-open (right) conformations of urease. His 320 is shown in red, and the remainder of the active site and ancillary pocket are coloured yellow and blue respectively. Nickel ions, where visible, are shown as green spheres. The first row shows a view from the top, looking down in the binding site, and the second row shows the pockets from the side.



Table 9. Degrees of sequence identity between HP, KA, BP and JB ureases. The identity of the entire protein sequence is shown in this table, as a reference for calculating conservation.

|    | HP     | KA     | BP     | JB |
|----|--------|--------|--------|----|
| KA | 60.23% |        |        |    |
| BP | 59.14% | 64.49% |        |    |
| JB | 56.45% | 59.19% | 55.95% |    |

Table 10. Degree of sequence identity between flap regions (bold residues in Figure 10) in the selected ureases.

|    | HP     | KA     | BP     | JB |
|----|--------|--------|--------|----|
| KA | 69.70% |        |        |    |
| BP | 72.73% | 81.82% |        |    |
| JB | 66.67% | 78.79% | 78.79% |    |

Table 11. Degree of sequence identity between significant residues in ancillary pockets (coloured residues in Figure 10) in the selected ureases. Residues are only included if in at least three of the four ureases the residue at the corresponding position is also making a significant contribution. (For sequence-identity purposes, if the residue in the remaining protein does not make a significant contribution to the ancillary pocket, it is treated as a gap.)

|    | HP     | KA     | BP     | JB |
|----|--------|--------|--------|----|
| KA | 61.29% |        |        |    |
| BP | 46.67% | 56.67% |        |    |
| JB | 50.00% | 46.67% | 44.83% |    |

REMARK 1 PDB of *K. aerogenes* urease with wide-open flap

|      |    |     |     |   |        |        |        |      |      |
|------|----|-----|-----|---|--------|--------|--------|------|------|
| ATOM | 1  | NI  | NI1 | 1 | 51.287 | 82.183 | 93.525 | 0.00 | 0.00 |
| ATOM | 2  | NI  | NI2 | 2 | 53.370 | 81.199 | 91.023 | 0.00 | 0.00 |
| ATOM | 3  | N   | MEN | 3 | 95.982 | 66.424 | 69.584 | 0.00 | 0.00 |
| ATOM | 4  | H1  | MEN | 3 | 96.885 | 66.524 | 70.025 | 0.00 | 0.00 |
| ATOM | 5  | H2  | MEN | 3 | 95.814 | 67.319 | 69.149 | 0.00 | 0.00 |
| ATOM | 6  | H3  | MEN | 3 | 95.984 | 65.730 | 68.850 | 0.00 | 0.00 |
| ATOM | 7  | CA  | MEN | 3 | 94.862 | 66.064 | 70.433 | 0.00 | 0.00 |
| ATOM | 8  | HA  | MEN | 3 | 95.162 | 65.171 | 70.981 | 0.00 | 0.00 |
| ATOM | 9  | CB  | MEN | 3 | 94.747 | 67.089 | 71.594 | 0.00 | 0.00 |
| ATOM | 10 | HB2 | MEN | 3 | 95.601 | 67.746 | 71.762 | 0.00 | 0.00 |
| ATOM | 11 | HB3 | MEN | 3 | 93.967 | 67.821 | 71.388 | 0.00 | 0.00 |
| ATOM | 12 | CG  | MEN | 3 | 94.458 | 66.323 | 72.869 | 0.00 | 0.00 |
| ATOM | 13 | HG2 | MEN | 3 | 95.191 | 65.551 | 73.101 | 0.00 | 0.00 |
| ATOM | 14 | HG3 | MEN | 3 | 94.515 | 67.056 | 73.674 | 0.00 | 0.00 |
| ATOM | 15 | SD  | MEN | 3 | 92.957 | 65.432 | 72.935 | 0.00 | 0.00 |
| ATOM | 16 | CE  | MEN | 3 | 92.873 | 65.115 | 74.780 | 0.00 | 0.00 |
| ATOM | 17 | HE1 | MEN | 3 | 91.910 | 64.657 | 75.006 | 0.00 | 0.00 |
| ATOM | 18 | HE2 | MEN | 3 | 93.600 | 64.342 | 75.031 | 0.00 | 0.00 |
| ATOM | 19 | HE3 | MEN | 3 | 93.065 | 66.009 | 75.374 | 0.00 | 0.00 |
| ATOM | 20 | C   | MEN | 3 | 93.472 | 65.811 | 69.761 | 0.00 | 0.00 |
| ATOM | 21 | O   | MEN | 3 | 93.175 | 64.658 | 69.499 | 0.00 | 0.00 |
| ATOM | 22 | N   | GLU | 4 | 92.831 | 66.891 | 69.333 | 0.00 | 0.00 |
| ATOM | 23 | H   | GLU | 4 | 93.398 | 67.723 | 69.422 | 0.00 | 0.00 |
| ATOM | 24 | CA  | GLU | 4 | 91.673 | 66.754 | 68.464 | 0.00 | 0.00 |
| ATOM | 25 | HA  | GLU | 4 | 91.164 | 67.717 | 68.487 | 0.00 | 0.00 |

|      |    |      |     |   |        |        |        |      |      |
|------|----|------|-----|---|--------|--------|--------|------|------|
| ATOM | 26 | CB   | GLU | 4 | 92.050 | 66.568 | 66.930 | 0.00 | 0.00 |
| ATOM | 27 | HB2  | GLU | 4 | 92.630 | 65.690 | 66.647 | 0.00 | 0.00 |
| ATOM | 28 | HB3  | GLU | 4 | 91.167 | 66.443 | 66.305 | 0.00 | 0.00 |
| ATOM | 29 | CG   | GLU | 4 | 92.715 | 67.832 | 66.415 | 0.00 | 0.00 |
| ATOM | 30 | HG2  | GLU | 4 | 92.680 | 67.906 | 65.328 | 0.00 | 0.00 |
| ATOM | 31 | HG3  | GLU | 4 | 92.333 | 68.750 | 66.860 | 0.00 | 0.00 |
| ATOM | 32 | CD   | GLU | 4 | 94.225 | 67.873 | 66.710 | 0.00 | 0.00 |
| ATOM | 33 | OE1  | GLU | 4 | 95.079 | 67.429 | 65.899 | 0.00 | 0.00 |
| ATOM | 34 | OE2  | GLU | 4 | 94.648 | 68.405 | 67.769 | 0.00 | 0.00 |
| ATOM | 35 | C    | GLU | 4 | 90.562 | 65.821 | 69.001 | 0.00 | 0.00 |
| ATOM | 36 | O    | GLU | 4 | 90.156 | 64.742 | 68.544 | 0.00 | 0.00 |
| ATOM | 37 | N    | LEU | 5 | 90.123 | 66.195 | 70.303 | 0.00 | 0.00 |
| ATOM | 38 | H    | LEU | 5 | 90.537 | 67.017 | 70.719 | 0.00 | 0.00 |
| ATOM | 39 | CA   | LEU | 5 | 89.083 | 65.332 | 70.980 | 0.00 | 0.00 |
| ATOM | 40 | HA   | LEU | 5 | 89.475 | 64.318 | 70.900 | 0.00 | 0.00 |
| ATOM | 41 | CB   | LEU | 5 | 88.973 | 65.754 | 72.484 | 0.00 | 0.00 |
| ATOM | 42 | HB2  | LEU | 5 | 89.948 | 65.942 | 72.933 | 0.00 | 0.00 |
| ATOM | 43 | HB3  | LEU | 5 | 88.442 | 66.702 | 72.572 | 0.00 | 0.00 |
| ATOM | 44 | CG   | LEU | 5 | 88.232 | 64.653 | 73.266 | 0.00 | 0.00 |
| ATOM | 45 | HG   | LEU | 5 | 87.388 | 64.214 | 72.736 | 0.00 | 0.00 |
| ATOM | 46 | CD1  | LEU | 5 | 89.147 | 63.472 | 73.593 | 0.00 | 0.00 |
| ATOM | 47 | 1HD1 | LEU | 5 | 89.317 | 62.941 | 72.656 | 0.00 | 0.00 |
| ATOM | 48 | 2HD1 | LEU | 5 | 90.090 | 63.917 | 73.909 | 0.00 | 0.00 |
| ATOM | 49 | 3HD1 | LEU | 5 | 88.751 | 62.839 | 74.388 | 0.00 | 0.00 |
| ATOM | 50 | CD2  | LEU | 5 | 87.815 | 65.231 | 74.577 | 0.00 | 0.00 |
| ATOM | 51 | 1HD2 | LEU | 5 | 88.702 | 65.443 | 75.174 | 0.00 | 0.00 |

|      |    |      |     |   |        |        |        |      |      |
|------|----|------|-----|---|--------|--------|--------|------|------|
| ATOM | 52 | 2HD2 | LEU | 5 | 87.380 | 66.230 | 74.620 | 0.00 | 0.00 |
| ATOM | 53 | 3HD2 | LEU | 5 | 87.191 | 64.462 | 75.033 | 0.00 | 0.00 |
| ATOM | 54 | C    | LEU | 5 | 87.654 | 65.338 | 70.266 | 0.00 | 0.00 |
| ATOM | 55 | O    | LEU | 5 | 87.031 | 66.379 | 69.912 | 0.00 | 0.00 |
| ATOM | 56 | N    | THR | 6 | 87.059 | 64.109 | 70.133 | 0.00 | 0.00 |
| ATOM | 57 | H    | THR | 6 | 87.545 | 63.339 | 70.570 | 0.00 | 0.00 |
| ATOM | 58 | CA   | THR | 6 | 85.748 | 63.906 | 69.478 | 0.00 | 0.00 |
| ATOM | 59 | HA   | THR | 6 | 85.561 | 64.809 | 68.897 | 0.00 | 0.00 |
| ATOM | 60 | CB   | THR | 6 | 85.795 | 62.751 | 68.488 | 0.00 | 0.00 |
| ATOM | 61 | HB   | THR | 6 | 84.769 | 62.670 | 68.129 | 0.00 | 0.00 |
| ATOM | 62 | CG2  | THR | 6 | 86.782 | 63.002 | 67.367 | 0.00 | 0.00 |
| ATOM | 63 | 1HG2 | THR | 6 | 86.860 | 62.093 | 66.771 | 0.00 | 0.00 |
| ATOM | 64 | 2HG2 | THR | 6 | 86.452 | 63.811 | 66.715 | 0.00 | 0.00 |
| ATOM | 65 | 3HG2 | THR | 6 | 87.789 | 63.267 | 67.692 | 0.00 | 0.00 |
| ATOM | 66 | OG1  | THR | 6 | 86.057 | 61.534 | 69.112 | 0.00 | 0.00 |
| ATOM | 67 | HG1  | THR | 6 | 86.943 | 61.720 | 69.430 | 0.00 | 0.00 |
| ATOM | 68 | C    | THR | 6 | 84.481 | 63.759 | 70.361 | 0.00 | 0.00 |
| ATOM | 69 | O    | THR | 6 | 84.450 | 63.304 | 71.445 | 0.00 | 0.00 |
| ATOM | 70 | N    | PRO | 7 | 83.266 | 63.784 | 69.694 | 0.00 | 0.00 |
| ATOM | 71 | CD   | PRO | 7 | 83.019 | 64.497 | 68.512 | 0.00 | 0.00 |
| ATOM | 72 | HD2  | PRO | 7 | 83.760 | 64.296 | 67.739 | 0.00 | 0.00 |
| ATOM | 73 | HD3  | PRO | 7 | 83.032 | 65.538 | 68.832 | 0.00 | 0.00 |
| ATOM | 74 | CG   | PRO | 7 | 81.647 | 64.060 | 68.053 | 0.00 | 0.00 |
| ATOM | 75 | HG2  | PRO | 7 | 81.176 | 64.765 | 67.368 | 0.00 | 0.00 |
| ATOM | 76 | HG3  | PRO | 7 | 81.727 | 63.077 | 67.590 | 0.00 | 0.00 |
| ATOM | 77 | CB   | PRO | 7 | 80.833 | 63.906 | 69.350 | 0.00 | 0.00 |

|      |     |          |   |        |        |        |      |      |
|------|-----|----------|---|--------|--------|--------|------|------|
| ATOM | 78  | HB2 PRO  | 7 | 80.129 | 64.708 | 69.573 | 0.00 | 0.00 |
| ATOM | 79  | HB3 PRO  | 7 | 80.245 | 62.996 | 69.223 | 0.00 | 0.00 |
| ATOM | 80  | CA PRO   | 7 | 81.966 | 63.644 | 70.380 | 0.00 | 0.00 |
| ATOM | 81  | HA PRO   | 7 | 81.873 | 64.435 | 71.125 | 0.00 | 0.00 |
| ATOM | 82  | C PRO    | 7 | 81.763 | 62.318 | 71.071 | 0.00 | 0.00 |
| ATOM | 83  | O PRO    | 7 | 81.316 | 62.328 | 72.216 | 0.00 | 0.00 |
| ATOM | 84  | N ARG    | 8 | 82.063 | 61.148 | 70.451 | 0.00 | 0.00 |
| ATOM | 85  | H ARG    | 8 | 82.393 | 61.256 | 69.503 | 0.00 | 0.00 |
| ATOM | 86  | CA ARG   | 8 | 81.978 | 59.838 | 71.072 | 0.00 | 0.00 |
| ATOM | 87  | HA ARG   | 8 | 80.939 | 59.742 | 71.387 | 0.00 | 0.00 |
| ATOM | 88  | CB ARG   | 8 | 82.334 | 58.632 | 70.156 | 0.00 | 0.00 |
| ATOM | 89  | HB2 ARG  | 8 | 82.036 | 57.748 | 70.720 | 0.00 | 0.00 |
| ATOM | 90  | HB3 ARG  | 8 | 81.764 | 58.747 | 69.234 | 0.00 | 0.00 |
| ATOM | 91  | CG ARG   | 8 | 83.767 | 58.503 | 69.747 | 0.00 | 0.00 |
| ATOM | 92  | HG2 ARG  | 8 | 84.216 | 57.834 | 70.481 | 0.00 | 0.00 |
| ATOM | 93  | HG3 ARG  | 8 | 84.236 | 59.487 | 69.736 | 0.00 | 0.00 |
| ATOM | 94  | CD ARG   | 8 | 84.058 | 57.870 | 68.383 | 0.00 | 0.00 |
| ATOM | 95  | HD2 ARG  | 8 | 85.132 | 57.796 | 68.214 | 0.00 | 0.00 |
| ATOM | 96  | HD3 ARG  | 8 | 83.589 | 56.887 | 68.340 | 0.00 | 0.00 |
| ATOM | 97  | NE ARG   | 8 | 83.642 | 58.798 | 67.344 | 0.00 | 0.00 |
| ATOM | 98  | HE ARG   | 8 | 82.861 | 59.381 | 67.610 | 0.00 | 0.00 |
| ATOM | 99  | CZ ARG   | 8 | 84.030 | 58.884 | 66.075 | 0.00 | 0.00 |
| ATOM | 100 | NH1 ARG  | 8 | 83.656 | 60.036 | 65.525 | 0.00 | 0.00 |
| ATOM | 101 | 1HH1 ARG | 8 | 84.124 | 60.422 | 64.717 | 0.00 | 0.00 |
| ATOM | 102 | 2HH1 ARG | 8 | 82.842 | 60.399 | 66.001 | 0.00 | 0.00 |
| ATOM | 103 | NH2 ARG  | 8 | 84.885 | 58.173 | 65.456 | 0.00 | 0.00 |

|      |     |      |     |    |        |        |        |      |      |
|------|-----|------|-----|----|--------|--------|--------|------|------|
| ATOM | 104 | 1HH2 | ARG | 8  | 84.794 | 58.195 | 64.450 | 0.00 | 0.00 |
| ATOM | 105 | 2HH2 | ARG | 8  | 85.192 | 57.332 | 65.923 | 0.00 | 0.00 |
| ATOM | 106 | C    | ARG | 8  | 82.823 | 59.731 | 72.350 | 0.00 | 0.00 |
| ATOM | 107 | O    | ARG | 8  | 82.423 | 59.114 | 73.309 | 0.00 | 0.00 |
| ATOM | 108 | N    | GLU | 9  | 84.012 | 60.327 | 72.252 | 0.00 | 0.00 |
| ATOM | 109 | H    | GLU | 9  | 84.086 | 60.820 | 71.374 | 0.00 | 0.00 |
| ATOM | 110 | CA   | GLU | 9  | 85.051 | 60.463 | 73.320 | 0.00 | 0.00 |
| ATOM | 111 | HA   | GLU | 9  | 85.269 | 59.487 | 73.754 | 0.00 | 0.00 |
| ATOM | 112 | CB   | GLU | 9  | 86.408 | 61.128 | 72.896 | 0.00 | 0.00 |
| ATOM | 113 | HB2  | GLU | 9  | 86.138 | 62.080 | 72.439 | 0.00 | 0.00 |
| ATOM | 114 | HB3  | GLU | 9  | 87.103 | 61.307 | 73.717 | 0.00 | 0.00 |
| ATOM | 115 | CG   | GLU | 9  | 87.156 | 60.224 | 71.871 | 0.00 | 0.00 |
| ATOM | 116 | HG2  | GLU | 9  | 87.446 | 59.326 | 72.417 | 0.00 | 0.00 |
| ATOM | 117 | HG3  | GLU | 9  | 86.523 | 60.025 | 71.006 | 0.00 | 0.00 |
| ATOM | 118 | CD   | GLU | 9  | 88.427 | 60.872 | 71.313 | 0.00 | 0.00 |
| ATOM | 119 | OE1  | GLU | 9  | 89.490 | 60.616 | 71.880 | 0.00 | 0.00 |
| ATOM | 120 | OE2  | GLU | 9  | 88.351 | 61.704 | 70.321 | 0.00 | 0.00 |
| ATOM | 121 | C    | GLU | 9  | 84.395 | 61.254 | 74.485 | 0.00 | 0.00 |
| ATOM | 122 | O    | GLU | 9  | 84.236 | 60.651 | 75.553 | 0.00 | 0.00 |
| ATOM | 123 | N    | LYS | 10 | 83.882 | 62.481 | 74.273 | 0.00 | 0.00 |
| ATOM | 124 | H    | LYS | 10 | 84.035 | 62.896 | 73.365 | 0.00 | 0.00 |
| ATOM | 125 | CA   | LYS | 10 | 83.207 | 63.289 | 75.354 | 0.00 | 0.00 |
| ATOM | 126 | HA   | LYS | 10 | 83.886 | 63.478 | 76.185 | 0.00 | 0.00 |
| ATOM | 127 | CB   | LYS | 10 | 82.751 | 64.665 | 74.886 | 0.00 | 0.00 |
| ATOM | 128 | HB2  | LYS | 10 | 81.890 | 64.605 | 74.220 | 0.00 | 0.00 |
| ATOM | 129 | HB3  | LYS | 10 | 82.288 | 65.171 | 75.733 | 0.00 | 0.00 |



|      |     |     |     |    |        |        |        |      |      |
|------|-----|-----|-----|----|--------|--------|--------|------|------|
| ATOM | 130 | CG  | LYS | 10 | 83.865 | 65.597 | 74.371 | 0.00 | 0.00 |
| ATOM | 131 | HG2 | LYS | 10 | 84.567 | 65.765 | 75.188 | 0.00 | 0.00 |
| ATOM | 132 | HG3 | LYS | 10 | 84.375 | 65.170 | 73.508 | 0.00 | 0.00 |
| ATOM | 133 | CD  | LYS | 10 | 83.187 | 66.922 | 74.085 | 0.00 | 0.00 |
| ATOM | 134 | HD2 | LYS | 10 | 82.477 | 66.620 | 73.315 | 0.00 | 0.00 |
| ATOM | 135 | HD3 | LYS | 10 | 82.724 | 67.355 | 74.972 | 0.00 | 0.00 |
| ATOM | 136 | CE  | LYS | 10 | 84.160 | 67.868 | 73.351 | 0.00 | 0.00 |
| ATOM | 137 | HE2 | LYS | 10 | 84.915 | 68.214 | 74.057 | 0.00 | 0.00 |
| ATOM | 138 | HE3 | LYS | 10 | 84.559 | 67.381 | 72.461 | 0.00 | 0.00 |
| ATOM | 139 | NZ  | LYS | 10 | 83.330 | 68.972 | 72.803 | 0.00 | 0.00 |
| ATOM | 140 | HZ1 | LYS | 10 | 82.805 | 68.550 | 72.051 | 0.00 | 0.00 |
| ATOM | 141 | HZ2 | LYS | 10 | 82.713 | 69.362 | 73.502 | 0.00 | 0.00 |
| ATOM | 142 | HZ3 | LYS | 10 | 83.845 | 69.716 | 72.355 | 0.00 | 0.00 |
| ATOM | 143 | C   | LYS | 10 | 82.054 | 62.567 | 75.992 | 0.00 | 0.00 |
| ATOM | 144 | O   | LYS | 10 | 81.857 | 62.646 | 77.170 | 0.00 | 0.00 |
| ATOM | 145 | N   | ASP | 11 | 81.326 | 61.723 | 75.324 | 0.00 | 0.00 |
| ATOM | 146 | H   | ASP | 11 | 81.682 | 61.471 | 74.414 | 0.00 | 0.00 |
| ATOM | 147 | CA  | ASP | 11 | 80.225 | 60.922 | 75.932 | 0.00 | 0.00 |
| ATOM | 148 | HA  | ASP | 11 | 79.418 | 61.522 | 76.352 | 0.00 | 0.00 |
| ATOM | 149 | CB  | ASP | 11 | 79.466 | 60.303 | 74.729 | 0.00 | 0.00 |
| ATOM | 150 | HB2 | ASP | 11 | 80.076 | 59.517 | 74.284 | 0.00 | 0.00 |
| ATOM | 151 | HB3 | ASP | 11 | 79.408 | 61.050 | 73.938 | 0.00 | 0.00 |
| ATOM | 152 | CG  | ASP | 11 | 78.008 | 59.894 | 74.992 | 0.00 | 0.00 |
| ATOM | 153 | OD1 | ASP | 11 | 77.576 | 58.801 | 74.547 | 0.00 | 0.00 |
| ATOM | 154 | OD2 | ASP | 11 | 77.275 | 60.824 | 75.437 | 0.00 | 0.00 |
| ATOM | 155 | C   | ASP | 11 | 80.695 | 59.850 | 76.898 | 0.00 | 0.00 |

|      |     |     |     |    |        |        |        |      |      |
|------|-----|-----|-----|----|--------|--------|--------|------|------|
| ATOM | 156 | O   | ASP | 11 | 80.153 | 59.594 | 77.998 | 0.00 | 0.00 |
| ATOM | 157 | N   | LYS | 12 | 81.713 | 59.101 | 76.473 | 0.00 | 0.00 |
| ATOM | 158 | H   | LYS | 12 | 82.000 | 59.159 | 75.506 | 0.00 | 0.00 |
| ATOM | 159 | CA  | LYS | 12 | 82.293 | 58.071 | 77.339 | 0.00 | 0.00 |
| ATOM | 160 | HA  | LYS | 12 | 81.536 | 57.390 | 77.727 | 0.00 | 0.00 |
| ATOM | 161 | CB  | LYS | 12 | 83.158 | 57.162 | 76.483 | 0.00 | 0.00 |
| ATOM | 162 | HB2 | LYS | 12 | 83.825 | 57.816 | 75.923 | 0.00 | 0.00 |
| ATOM | 163 | HB3 | LYS | 12 | 83.549 | 56.337 | 77.079 | 0.00 | 0.00 |
| ATOM | 164 | CG  | LYS | 12 | 82.340 | 56.534 | 75.309 | 0.00 | 0.00 |
| ATOM | 165 | HG2 | LYS | 12 | 81.564 | 55.955 | 75.811 | 0.00 | 0.00 |
| ATOM | 166 | HG3 | LYS | 12 | 81.872 | 57.297 | 74.687 | 0.00 | 0.00 |
| ATOM | 167 | CD  | LYS | 12 | 83.148 | 55.669 | 74.351 | 0.00 | 0.00 |
| ATOM | 168 | HD2 | LYS | 12 | 83.925 | 56.340 | 73.985 | 0.00 | 0.00 |
| ATOM | 169 | HD3 | LYS | 12 | 83.452 | 54.751 | 74.854 | 0.00 | 0.00 |
| ATOM | 170 | CE  | LYS | 12 | 82.509 | 55.404 | 73.056 | 0.00 | 0.00 |
| ATOM | 171 | HE2 | LYS | 12 | 81.914 | 56.288 | 72.827 | 0.00 | 0.00 |
| ATOM | 172 | HE3 | LYS | 12 | 83.226 | 55.199 | 72.261 | 0.00 | 0.00 |
| ATOM | 173 | NZ  | LYS | 12 | 81.676 | 54.192 | 73.164 | 0.00 | 0.00 |
| ATOM | 174 | HZ1 | LYS | 12 | 81.165 | 54.286 | 74.031 | 0.00 | 0.00 |
| ATOM | 175 | HZ2 | LYS | 12 | 80.916 | 54.200 | 72.499 | 0.00 | 0.00 |
| ATOM | 176 | HZ3 | LYS | 12 | 82.159 | 53.305 | 73.177 | 0.00 | 0.00 |
| ATOM | 177 | C   | LYS | 12 | 83.019 | 58.576 | 78.532 | 0.00 | 0.00 |
| ATOM | 178 | O   | LYS | 12 | 83.200 | 57.879 | 79.536 | 0.00 | 0.00 |
| ATOM | 179 | N   | LEU | 13 | 83.356 | 59.866 | 78.515 | 0.00 | 0.00 |
| ATOM | 180 | H   | LEU | 13 | 83.237 | 60.323 | 77.622 | 0.00 | 0.00 |
| ATOM | 181 | CA  | LEU | 13 | 83.884 | 60.720 | 79.554 | 0.00 | 0.00 |

|      |     |      |     |    |        |        |        |      |      |
|------|-----|------|-----|----|--------|--------|--------|------|------|
| ATOM | 182 | HA   | LEU | 13 | 84.517 | 60.103 | 80.192 | 0.00 | 0.00 |
| ATOM | 183 | CB   | LEU | 13 | 84.768 | 61.788 | 78.964 | 0.00 | 0.00 |
| ATOM | 184 | HB2  | LEU | 13 | 85.300 | 61.303 | 78.146 | 0.00 | 0.00 |
| ATOM | 185 | HB3  | LEU | 13 | 84.167 | 62.534 | 78.442 | 0.00 | 0.00 |
| ATOM | 186 | CG   | LEU | 13 | 85.679 | 62.719 | 79.751 | 0.00 | 0.00 |
| ATOM | 187 | HG   | LEU | 13 | 85.056 | 63.323 | 80.410 | 0.00 | 0.00 |
| ATOM | 188 | CD1  | LEU | 13 | 86.564 | 61.882 | 80.577 | 0.00 | 0.00 |
| ATOM | 189 | 1HD1 | LEU | 13 | 85.939 | 61.432 | 81.349 | 0.00 | 0.00 |
| ATOM | 190 | 2HD1 | LEU | 13 | 87.078 | 61.163 | 79.938 | 0.00 | 0.00 |
| ATOM | 191 | 3HD1 | LEU | 13 | 87.421 | 62.412 | 80.992 | 0.00 | 0.00 |
| ATOM | 192 | CD2  | LEU | 13 | 86.515 | 63.748 | 78.985 | 0.00 | 0.00 |
| ATOM | 193 | 1HD2 | LEU | 13 | 87.163 | 64.297 | 79.669 | 0.00 | 0.00 |
| ATOM | 194 | 2HD2 | LEU | 13 | 87.115 | 63.158 | 78.292 | 0.00 | 0.00 |
| ATOM | 195 | 3HD2 | LEU | 13 | 85.832 | 64.376 | 78.413 | 0.00 | 0.00 |
| ATOM | 196 | C    | LEU | 13 | 82.830 | 61.333 | 80.513 | 0.00 | 0.00 |
| ATOM | 197 | O    | LEU | 13 | 83.158 | 61.629 | 81.661 | 0.00 | 0.00 |
| ATOM | 198 | N    | LEU | 14 | 81.531 | 61.273 | 80.196 | 0.00 | 0.00 |
| ATOM | 199 | H    | LEU | 14 | 81.271 | 60.868 | 79.308 | 0.00 | 0.00 |
| ATOM | 200 | CA   | LEU | 14 | 80.405 | 61.404 | 81.120 | 0.00 | 0.00 |
| ATOM | 201 | HA   | LEU | 14 | 80.665 | 62.190 | 81.829 | 0.00 | 0.00 |
| ATOM | 202 | CB   | LEU | 14 | 79.113 | 61.680 | 80.386 | 0.00 | 0.00 |
| ATOM | 203 | HB2  | LEU | 14 | 79.351 | 62.439 | 79.641 | 0.00 | 0.00 |
| ATOM | 204 | HB3  | LEU | 14 | 78.994 | 60.747 | 79.834 | 0.00 | 0.00 |
| ATOM | 205 | CG   | LEU | 14 | 77.835 | 61.995 | 81.141 | 0.00 | 0.00 |
| ATOM | 206 | HG   | LEU | 14 | 77.553 | 61.308 | 81.939 | 0.00 | 0.00 |
| ATOM | 207 | CD1  | LEU | 14 | 77.715 | 63.467 | 81.447 | 0.00 | 0.00 |

|      |     |      |     |    |        |        |        |      |      |
|------|-----|------|-----|----|--------|--------|--------|------|------|
| ATOM | 208 | 1HD1 | LEU | 14 | 78.111 | 63.762 | 82.419 | 0.00 | 0.00 |
| ATOM | 209 | 2HD1 | LEU | 14 | 78.065 | 64.066 | 80.606 | 0.00 | 0.00 |
| ATOM | 210 | 3HD1 | LEU | 14 | 76.659 | 63.729 | 81.515 | 0.00 | 0.00 |
| ATOM | 211 | CD2  | LEU | 14 | 76.761 | 61.743 | 80.051 | 0.00 | 0.00 |
| ATOM | 212 | 1HD2 | LEU | 14 | 76.701 | 62.613 | 79.398 | 0.00 | 0.00 |
| ATOM | 213 | 2HD2 | LEU | 14 | 76.908 | 60.905 | 79.370 | 0.00 | 0.00 |
| ATOM | 214 | 3HD2 | LEU | 14 | 75.786 | 61.561 | 80.502 | 0.00 | 0.00 |
| ATOM | 215 | C    | LEU | 14 | 80.196 | 60.069 | 81.920 | 0.00 | 0.00 |
| ATOM | 216 | O    | LEU | 14 | 79.948 | 60.129 | 83.144 | 0.00 | 0.00 |
| ATOM | 217 | N    | LEU | 15 | 80.294 | 58.927 | 81.255 | 0.00 | 0.00 |
| ATOM | 218 | H    | LEU | 15 | 80.612 | 59.012 | 80.300 | 0.00 | 0.00 |
| ATOM | 219 | CA   | LEU | 15 | 80.257 | 57.669 | 81.979 | 0.00 | 0.00 |
| ATOM | 220 | HA   | LEU | 15 | 79.280 | 57.740 | 82.458 | 0.00 | 0.00 |
| ATOM | 221 | CB   | LEU | 15 | 80.225 | 56.421 | 81.018 | 0.00 | 0.00 |
| ATOM | 222 | HB2  | LEU | 15 | 79.452 | 56.496 | 80.253 | 0.00 | 0.00 |
| ATOM | 223 | HB3  | LEU | 15 | 81.189 | 56.473 | 80.513 | 0.00 | 0.00 |
| ATOM | 224 | CG   | LEU | 15 | 80.087 | 54.994 | 81.624 | 0.00 | 0.00 |
| ATOM | 225 | HG   | LEU | 15 | 80.873 | 54.813 | 82.357 | 0.00 | 0.00 |
| ATOM | 226 | CD1  | LEU | 15 | 78.746 | 54.945 | 82.337 | 0.00 | 0.00 |
| ATOM | 227 | 1HD1 | LEU | 15 | 78.852 | 54.024 | 82.911 | 0.00 | 0.00 |
| ATOM | 228 | 2HD1 | LEU | 15 | 78.601 | 55.833 | 82.953 | 0.00 | 0.00 |
| ATOM | 229 | 3HD1 | LEU | 15 | 77.924 | 54.911 | 81.622 | 0.00 | 0.00 |
| ATOM | 230 | CD2  | LEU | 15 | 80.089 | 53.948 | 80.503 | 0.00 | 0.00 |
| ATOM | 231 | 1HD2 | LEU | 15 | 80.376 | 52.939 | 80.798 | 0.00 | 0.00 |
| ATOM | 232 | 2HD2 | LEU | 15 | 79.079 | 53.972 | 80.095 | 0.00 | 0.00 |
| ATOM | 233 | 3HD2 | LEU | 15 | 80.847 | 54.203 | 79.762 | 0.00 | 0.00 |

|      |     |     |     |    |        |        |        |      |      |
|------|-----|-----|-----|----|--------|--------|--------|------|------|
| ATOM | 234 | C   | LEU | 15 | 81.324 | 57.457 | 83.025 | 0.00 | 0.00 |
| ATOM | 235 | O   | LEU | 15 | 81.059 | 56.911 | 84.108 | 0.00 | 0.00 |
| ATOM | 236 | N   | PHE | 16 | 82.531 | 57.959 | 82.792 | 0.00 | 0.00 |
| ATOM | 237 | H   | PHE | 16 | 82.730 | 58.253 | 81.847 | 0.00 | 0.00 |
| ATOM | 238 | CA  | PHE | 16 | 83.599 | 57.976 | 83.831 | 0.00 | 0.00 |
| ATOM | 239 | HA  | PHE | 16 | 83.798 | 57.003 | 84.280 | 0.00 | 0.00 |
| ATOM | 240 | CB  | PHE | 16 | 84.857 | 58.519 | 83.196 | 0.00 | 0.00 |
| ATOM | 241 | HB2 | PHE | 16 | 85.241 | 57.794 | 82.479 | 0.00 | 0.00 |
| ATOM | 242 | HB3 | PHE | 16 | 84.650 | 59.395 | 82.581 | 0.00 | 0.00 |
| ATOM | 243 | CG  | PHE | 16 | 85.941 | 58.955 | 84.211 | 0.00 | 0.00 |
| ATOM | 244 | CD1 | PHE | 16 | 86.363 | 58.050 | 85.185 | 0.00 | 0.00 |
| ATOM | 245 | HD1 | PHE | 16 | 85.886 | 57.082 | 85.133 | 0.00 | 0.00 |
| ATOM | 246 | CE1 | PHE | 16 | 87.232 | 58.438 | 86.152 | 0.00 | 0.00 |
| ATOM | 247 | HE1 | PHE | 16 | 87.579 | 57.696 | 86.855 | 0.00 | 0.00 |
| ATOM | 248 | CZ  | PHE | 16 | 87.748 | 59.719 | 86.309 | 0.00 | 0.00 |
| ATOM | 249 | HZ  | PHE | 16 | 88.613 | 60.020 | 86.882 | 0.00 | 0.00 |
| ATOM | 250 | CE2 | PHE | 16 | 87.377 | 60.597 | 85.286 | 0.00 | 0.00 |
| ATOM | 251 | HE2 | PHE | 16 | 87.798 | 61.591 | 85.331 | 0.00 | 0.00 |
| ATOM | 252 | CD2 | PHE | 16 | 86.487 | 60.265 | 84.259 | 0.00 | 0.00 |
| ATOM | 253 | HD2 | PHE | 16 | 86.254 | 61.062 | 83.567 | 0.00 | 0.00 |
| ATOM | 254 | C   | PHE | 16 | 83.143 | 58.858 | 85.016 | 0.00 | 0.00 |
| ATOM | 255 | O   | PHE | 16 | 83.266 | 58.423 | 86.175 | 0.00 | 0.00 |
| ATOM | 256 | N   | THR | 17 | 82.579 | 60.102 | 84.795 | 0.00 | 0.00 |
| ATOM | 257 | H   | THR | 17 | 82.357 | 60.532 | 83.909 | 0.00 | 0.00 |
| ATOM | 258 | CA  | THR | 17 | 82.347 | 60.956 | 85.910 | 0.00 | 0.00 |
| ATOM | 259 | HA  | THR | 17 | 83.283 | 60.870 | 86.462 | 0.00 | 0.00 |

|      |     |      |     |    |        |        |        |      |      |
|------|-----|------|-----|----|--------|--------|--------|------|------|
| ATOM | 260 | CB   | THR | 17 | 82.335 | 62.488 | 85.545 | 0.00 | 0.00 |
| ATOM | 261 | HB   | THR | 17 | 82.001 | 63.071 | 86.403 | 0.00 | 0.00 |
| ATOM | 262 | CG2  | THR | 17 | 83.689 | 62.972 | 85.098 | 0.00 | 0.00 |
| ATOM | 263 | 1HG2 | THR | 17 | 83.882 | 62.254 | 84.301 | 0.00 | 0.00 |
| ATOM | 264 | 2HG2 | THR | 17 | 83.697 | 64.017 | 84.791 | 0.00 | 0.00 |
| ATOM | 265 | 3HG2 | THR | 17 | 84.544 | 62.875 | 85.768 | 0.00 | 0.00 |
| ATOM | 266 | OG1  | THR | 17 | 81.581 | 62.872 | 84.356 | 0.00 | 0.00 |
| ATOM | 267 | HG1  | THR | 17 | 81.578 | 63.830 | 84.287 | 0.00 | 0.00 |
| ATOM | 268 | C    | THR | 17 | 81.323 | 60.456 | 86.871 | 0.00 | 0.00 |
| ATOM | 269 | O    | THR | 17 | 81.576 | 60.458 | 88.078 | 0.00 | 0.00 |
| ATOM | 270 | N    | ALA | 18 | 80.252 | 59.855 | 86.348 | 0.00 | 0.00 |
| ATOM | 271 | H    | ALA | 18 | 80.166 | 59.942 | 85.345 | 0.00 | 0.00 |
| ATOM | 272 | CA   | ALA | 18 | 79.185 | 59.162 | 87.072 | 0.00 | 0.00 |
| ATOM | 273 | HA   | ALA | 18 | 78.823 | 59.857 | 87.830 | 0.00 | 0.00 |
| ATOM | 274 | CB   | ALA | 18 | 78.090 | 58.893 | 86.038 | 0.00 | 0.00 |
| ATOM | 275 | HB1  | ALA | 18 | 77.760 | 59.707 | 85.393 | 0.00 | 0.00 |
| ATOM | 276 | HB2  | ALA | 18 | 78.378 | 58.101 | 85.346 | 0.00 | 0.00 |
| ATOM | 277 | HB3  | ALA | 18 | 77.216 | 58.514 | 86.568 | 0.00 | 0.00 |
| ATOM | 278 | C    | ALA | 18 | 79.667 | 57.873 | 87.809 | 0.00 | 0.00 |
| ATOM | 279 | O    | ALA | 18 | 79.326 | 57.484 | 88.937 | 0.00 | 0.00 |
| ATOM | 280 | N    | ALA | 19 | 80.611 | 57.121 | 87.227 | 0.00 | 0.00 |
| ATOM | 281 | H    | ALA | 19 | 80.963 | 57.438 | 86.335 | 0.00 | 0.00 |
| ATOM | 282 | CA   | ALA | 19 | 81.391 | 55.967 | 87.828 | 0.00 | 0.00 |
| ATOM | 283 | HA   | ALA | 19 | 80.667 | 55.248 | 88.210 | 0.00 | 0.00 |
| ATOM | 284 | CB   | ALA | 19 | 82.081 | 55.267 | 86.756 | 0.00 | 0.00 |
| ATOM | 285 | HB1  | ALA | 19 | 82.596 | 54.359 | 87.069 | 0.00 | 0.00 |

|      |     |          |    |        |        |        |      |      |
|------|-----|----------|----|--------|--------|--------|------|------|
| ATOM | 286 | HB2 ALA  | 19 | 81.303 | 55.003 | 86.040 | 0.00 | 0.00 |
| ATOM | 287 | HB3 ALA  | 19 | 82.818 | 55.878 | 86.236 | 0.00 | 0.00 |
| ATOM | 288 | C ALA    | 19 | 82.281 | 56.406 | 89.031 | 0.00 | 0.00 |
| ATOM | 289 | O ALA    | 19 | 82.205 | 55.737 | 90.063 | 0.00 | 0.00 |
| ATOM | 290 | N LEU    | 20 | 82.974 | 57.563 | 88.946 | 0.00 | 0.00 |
| ATOM | 291 | H LEU    | 20 | 83.082 | 57.980 | 88.033 | 0.00 | 0.00 |
| ATOM | 292 | CA LEU   | 20 | 83.671 | 58.208 | 90.077 | 0.00 | 0.00 |
| ATOM | 293 | HA LEU   | 20 | 84.354 | 57.458 | 90.474 | 0.00 | 0.00 |
| ATOM | 294 | CB LEU   | 20 | 84.582 | 59.295 | 89.440 | 0.00 | 0.00 |
| ATOM | 295 | HB2 LEU  | 20 | 85.046 | 58.776 | 88.602 | 0.00 | 0.00 |
| ATOM | 296 | HB3 LEU  | 20 | 83.933 | 60.111 | 89.123 | 0.00 | 0.00 |
| ATOM | 297 | CG LEU   | 20 | 85.641 | 59.810 | 90.370 | 0.00 | 0.00 |
| ATOM | 298 | HG LEU   | 20 | 85.212 | 60.040 | 91.345 | 0.00 | 0.00 |
| ATOM | 299 | CD1 LEU  | 20 | 86.588 | 58.647 | 90.773 | 0.00 | 0.00 |
| ATOM | 300 | 1HD1 LEU | 20 | 87.568 | 58.982 | 91.114 | 0.00 | 0.00 |
| ATOM | 301 | 2HD1 LEU | 20 | 86.217 | 58.088 | 91.632 | 0.00 | 0.00 |
| ATOM | 302 | 3HD1 LEU | 20 | 86.900 | 58.060 | 89.909 | 0.00 | 0.00 |
| ATOM | 303 | CD2 LEU  | 20 | 86.431 | 60.970 | 89.704 | 0.00 | 0.00 |
| ATOM | 304 | 1HD2 LEU | 20 | 86.545 | 60.664 | 88.664 | 0.00 | 0.00 |
| ATOM | 305 | 2HD2 LEU | 20 | 85.952 | 61.943 | 89.808 | 0.00 | 0.00 |
| ATOM | 306 | 3HD2 LEU | 20 | 87.386 | 61.129 | 90.205 | 0.00 | 0.00 |
| ATOM | 307 | C LEU    | 20 | 82.767 | 58.663 | 91.242 | 0.00 | 0.00 |
| ATOM | 308 | O LEU    | 20 | 83.123 | 58.500 | 92.366 | 0.00 | 0.00 |
| ATOM | 309 | N VAL    | 21 | 81.598 | 59.234 | 90.886 | 0.00 | 0.00 |
| ATOM | 310 | H VAL    | 21 | 81.491 | 59.261 | 89.882 | 0.00 | 0.00 |
| ATOM | 311 | CA VAL   | 21 | 80.484 | 59.549 | 91.832 | 0.00 | 0.00 |

|      |     |      |     |    |        |        |        |      |      |
|------|-----|------|-----|----|--------|--------|--------|------|------|
| ATOM | 312 | HA   | VAL | 21 | 80.877 | 60.246 | 92.572 | 0.00 | 0.00 |
| ATOM | 313 | CB   | VAL | 21 | 79.325 | 60.328 | 91.155 | 0.00 | 0.00 |
| ATOM | 314 | HB   | VAL | 21 | 79.114 | 59.794 | 90.229 | 0.00 | 0.00 |
| ATOM | 315 | CG1  | VAL | 21 | 78.031 | 60.329 | 91.965 | 0.00 | 0.00 |
| ATOM | 316 | 1HG1 | VAL | 21 | 77.424 | 61.105 | 91.499 | 0.00 | 0.00 |
| ATOM | 317 | 2HG1 | VAL | 21 | 77.582 | 59.336 | 91.946 | 0.00 | 0.00 |
| ATOM | 318 | 3HG1 | VAL | 21 | 78.317 | 60.548 | 92.993 | 0.00 | 0.00 |
| ATOM | 319 | CG2  | VAL | 21 | 79.767 | 61.766 | 90.864 | 0.00 | 0.00 |
| ATOM | 320 | 1HG2 | VAL | 21 | 80.106 | 62.217 | 91.796 | 0.00 | 0.00 |
| ATOM | 321 | 2HG2 | VAL | 21 | 80.572 | 61.699 | 90.132 | 0.00 | 0.00 |
| ATOM | 322 | 3HG2 | VAL | 21 | 78.890 | 62.266 | 90.454 | 0.00 | 0.00 |
| ATOM | 323 | C    | VAL | 21 | 79.994 | 58.286 | 92.644 | 0.00 | 0.00 |
| ATOM | 324 | O    | VAL | 21 | 79.971 | 58.292 | 93.864 | 0.00 | 0.00 |
| ATOM | 325 | N    | ALA | 22 | 79.784 | 57.194 | 91.915 | 0.00 | 0.00 |
| ATOM | 326 | H    | ALA | 22 | 79.735 | 57.280 | 90.910 | 0.00 | 0.00 |
| ATOM | 327 | CA   | ALA | 22 | 79.330 | 55.900 | 92.456 | 0.00 | 0.00 |
| ATOM | 328 | HA   | ALA | 22 | 78.464 | 56.060 | 93.098 | 0.00 | 0.00 |
| ATOM | 329 | CB   | ALA | 22 | 78.992 | 54.996 | 91.263 | 0.00 | 0.00 |
| ATOM | 330 | HB1  | ALA | 22 | 79.843 | 54.856 | 90.598 | 0.00 | 0.00 |
| ATOM | 331 | HB2  | ALA | 22 | 78.606 | 54.083 | 91.716 | 0.00 | 0.00 |
| ATOM | 332 | HB3  | ALA | 22 | 78.194 | 55.465 | 90.688 | 0.00 | 0.00 |
| ATOM | 333 | C    | ALA | 22 | 80.344 | 55.206 | 93.348 | 0.00 | 0.00 |
| ATOM | 334 | O    | ALA | 22 | 79.989 | 54.817 | 94.448 | 0.00 | 0.00 |
| ATOM | 335 | N    | GLU | 23 | 81.626 | 55.126 | 92.937 | 0.00 | 0.00 |
| ATOM | 336 | H    | GLU | 23 | 81.851 | 55.448 | 92.006 | 0.00 | 0.00 |
| ATOM | 337 | CA   | GLU | 23 | 82.775 | 54.560 | 93.674 | 0.00 | 0.00 |



|      |     |     |     |    |        |        |        |      |      |
|------|-----|-----|-----|----|--------|--------|--------|------|------|
| ATOM | 338 | HA  | GLU | 23 | 82.628 | 53.512 | 93.932 | 0.00 | 0.00 |
| ATOM | 339 | CB  | GLU | 23 | 84.115 | 54.703 | 92.916 | 0.00 | 0.00 |
| ATOM | 340 | HB2 | GLU | 23 | 84.024 | 54.182 | 91.963 | 0.00 | 0.00 |
| ATOM | 341 | HB3 | GLU | 23 | 84.485 | 55.723 | 92.811 | 0.00 | 0.00 |
| ATOM | 342 | CG  | GLU | 23 | 85.277 | 53.976 | 93.685 | 0.00 | 0.00 |
| ATOM | 343 | HG2 | GLU | 23 | 85.473 | 54.476 | 94.633 | 0.00 | 0.00 |
| ATOM | 344 | HG3 | GLU | 23 | 84.932 | 53.004 | 94.037 | 0.00 | 0.00 |
| ATOM | 345 | CD  | GLU | 23 | 86.532 | 53.917 | 92.817 | 0.00 | 0.00 |
| ATOM | 346 | OE1 | GLU | 23 | 86.569 | 53.067 | 91.908 | 0.00 | 0.00 |
| ATOM | 347 | OE2 | GLU | 23 | 87.484 | 54.680 | 92.956 | 0.00 | 0.00 |
| ATOM | 348 | C   | GLU | 23 | 82.900 | 55.302 | 94.978 | 0.00 | 0.00 |
| ATOM | 349 | O   | GLU | 23 | 82.927 | 54.628 | 96.035 | 0.00 | 0.00 |
| ATOM | 350 | N   | ARG | 24 | 82.756 | 56.667 | 94.966 | 0.00 | 0.00 |
| ATOM | 351 | H   | ARG | 24 | 82.644 | 57.107 | 94.063 | 0.00 | 0.00 |
| ATOM | 352 | CA  | ARG | 24 | 82.873 | 57.420 | 96.251 | 0.00 | 0.00 |
| ATOM | 353 | HA  | ARG | 24 | 83.809 | 57.100 | 96.709 | 0.00 | 0.00 |
| ATOM | 354 | CB  | ARG | 24 | 83.023 | 58.922 | 95.930 | 0.00 | 0.00 |
| ATOM | 355 | HB2 | ARG | 24 | 82.217 | 59.354 | 95.338 | 0.00 | 0.00 |
| ATOM | 356 | HB3 | ARG | 24 | 82.905 | 59.361 | 96.921 | 0.00 | 0.00 |
| ATOM | 357 | CG  | ARG | 24 | 84.421 | 59.305 | 95.353 | 0.00 | 0.00 |
| ATOM | 358 | HG2 | ARG | 24 | 85.249 | 59.245 | 96.060 | 0.00 | 0.00 |
| ATOM | 359 | HG3 | ARG | 24 | 84.679 | 58.571 | 94.591 | 0.00 | 0.00 |
| ATOM | 360 | CD  | ARG | 24 | 84.476 | 60.762 | 94.794 | 0.00 | 0.00 |
| ATOM | 361 | HD2 | ARG | 24 | 85.386 | 60.824 | 94.197 | 0.00 | 0.00 |
| ATOM | 362 | HD3 | ARG | 24 | 83.638 | 60.832 | 94.100 | 0.00 | 0.00 |
| ATOM | 363 | NE  | ARG | 24 | 84.507 | 61.764 | 95.804 | 0.00 | 0.00 |

|      |     |      |     |    |        |        |        |      |      |
|------|-----|------|-----|----|--------|--------|--------|------|------|
| ATOM | 364 | HE   | ARG | 24 | 83.641 | 62.045 | 96.243 | 0.00 | 0.00 |
| ATOM | 365 | CZ   | ARG | 24 | 85.552 | 62.470 | 96.239 | 0.00 | 0.00 |
| ATOM | 366 | NH1  | ARG | 24 | 86.729 | 62.364 | 95.722 | 0.00 | 0.00 |
| ATOM | 367 | 1HH1 | ARG | 24 | 87.412 | 62.987 | 96.129 | 0.00 | 0.00 |
| ATOM | 368 | 2HH1 | ARG | 24 | 86.992 | 61.718 | 94.991 | 0.00 | 0.00 |
| ATOM | 369 | NH2  | ARG | 24 | 85.445 | 63.396 | 97.206 | 0.00 | 0.00 |
| ATOM | 370 | 1HH2 | ARG | 24 | 86.171 | 64.089 | 97.321 | 0.00 | 0.00 |
| ATOM | 371 | 2HH2 | ARG | 24 | 84.596 | 63.507 | 97.741 | 0.00 | 0.00 |
| ATOM | 372 | C    | ARG | 24 | 81.726 | 57.179 | 97.214 | 0.00 | 0.00 |
| ATOM | 373 | O    | ARG | 24 | 81.940 | 57.244 | 98.397 | 0.00 | 0.00 |
| ATOM | 374 | N    | ARG | 25 | 80.552 | 56.831 | 96.706 | 0.00 | 0.00 |
| ATOM | 375 | H    | ARG | 25 | 80.703 | 56.540 | 95.750 | 0.00 | 0.00 |
| ATOM | 376 | CA   | ARG | 25 | 79.353 | 56.448 | 97.534 | 0.00 | 0.00 |
| ATOM | 377 | HA   | ARG | 25 | 79.196 | 57.033 | 98.440 | 0.00 | 0.00 |
| ATOM | 378 | CB   | ARG | 25 | 78.093 | 56.842 | 96.746 | 0.00 | 0.00 |
| ATOM | 379 | HB2  | ARG | 25 | 78.101 | 56.387 | 95.755 | 0.00 | 0.00 |
| ATOM | 380 | HB3  | ARG | 25 | 77.251 | 56.372 | 97.254 | 0.00 | 0.00 |
| ATOM | 381 | CG   | ARG | 25 | 77.818 | 58.357 | 96.792 | 0.00 | 0.00 |
| ATOM | 382 | HG2  | ARG | 25 | 77.787 | 58.706 | 97.824 | 0.00 | 0.00 |
| ATOM | 383 | HG3  | ARG | 25 | 78.651 | 58.905 | 96.350 | 0.00 | 0.00 |
| ATOM | 384 | CD   | ARG | 25 | 76.522 | 58.769 | 96.084 | 0.00 | 0.00 |
| ATOM | 385 | HD2  | ARG | 25 | 76.529 | 58.347 | 95.079 | 0.00 | 0.00 |
| ATOM | 386 | HD3  | ARG | 25 | 75.640 | 58.378 | 96.592 | 0.00 | 0.00 |
| ATOM | 387 | NE   | ARG | 25 | 76.438 | 60.223 | 95.911 | 0.00 | 0.00 |
| ATOM | 388 | HE   | ARG | 25 | 76.938 | 60.765 | 96.601 | 0.00 | 0.00 |
| ATOM | 389 | CZ   | ARG | 25 | 75.675 | 60.968 | 95.094 | 0.00 | 0.00 |

|      |     |      |     |    |        |        |        |      |      |
|------|-----|------|-----|----|--------|--------|--------|------|------|
| ATOM | 390 | NH1  | ARG | 25 | 75.823 | 62.226 | 95.125 | 0.00 | 0.00 |
| ATOM | 391 | 1HH1 | ARG | 25 | 75.030 | 62.827 | 94.947 | 0.00 | 0.00 |
| ATOM | 392 | 2HH1 | ARG | 25 | 76.560 | 62.526 | 95.747 | 0.00 | 0.00 |
| ATOM | 393 | NH2  | ARG | 25 | 74.824 | 60.463 | 94.280 | 0.00 | 0.00 |
| ATOM | 394 | 1HH2 | ARG | 25 | 74.503 | 60.977 | 93.473 | 0.00 | 0.00 |
| ATOM | 395 | 2HH2 | ARG | 25 | 74.760 | 59.456 | 94.340 | 0.00 | 0.00 |
| ATOM | 396 | C    | ARG | 25 | 79.561 | 54.984 | 98.080 | 0.00 | 0.00 |
| ATOM | 397 | O    | ARG | 25 | 79.447 | 54.800 | 99.245 | 0.00 | 0.00 |
| ATOM | 398 | N    | LEU | 26 | 79.853 | 54.038 | 97.237 | 0.00 | 0.00 |
| ATOM | 399 | H    | LEU | 26 | 79.827 | 54.271 | 96.254 | 0.00 | 0.00 |
| ATOM | 400 | CA   | LEU | 26 | 80.314 | 52.706 | 97.748 | 0.00 | 0.00 |
| ATOM | 401 | HA   | LEU | 26 | 79.482 | 52.090 | 98.090 | 0.00 | 0.00 |
| ATOM | 402 | CB   | LEU | 26 | 80.934 | 52.018 | 96.509 | 0.00 | 0.00 |
| ATOM | 403 | HB2  | LEU | 26 | 80.121 | 51.898 | 95.793 | 0.00 | 0.00 |
| ATOM | 404 | HB3  | LEU | 26 | 81.612 | 52.719 | 96.022 | 0.00 | 0.00 |
| ATOM | 405 | CG   | LEU | 26 | 81.614 | 50.609 | 96.732 | 0.00 | 0.00 |
| ATOM | 406 | HG   | LEU | 26 | 82.402 | 50.807 | 97.458 | 0.00 | 0.00 |
| ATOM | 407 | CD1  | LEU | 26 | 80.688 | 49.515 | 97.256 | 0.00 | 0.00 |
| ATOM | 408 | 1HD1 | LEU | 26 | 80.298 | 49.805 | 98.232 | 0.00 | 0.00 |
| ATOM | 409 | 2HD1 | LEU | 26 | 79.895 | 49.369 | 96.522 | 0.00 | 0.00 |
| ATOM | 410 | 3HD1 | LEU | 26 | 81.349 | 48.665 | 97.420 | 0.00 | 0.00 |
| ATOM | 411 | CD2  | LEU | 26 | 82.298 | 50.143 | 95.445 | 0.00 | 0.00 |
| ATOM | 412 | 1HD2 | LEU | 26 | 83.023 | 50.874 | 95.087 | 0.00 | 0.00 |
| ATOM | 413 | 2HD2 | LEU | 26 | 82.915 | 49.272 | 95.669 | 0.00 | 0.00 |
| ATOM | 414 | 3HD2 | LEU | 26 | 81.483 | 50.017 | 94.734 | 0.00 | 0.00 |
| ATOM | 415 | C    | LEU | 26 | 81.414 | 52.700 | 98.843 | 0.00 | 0.00 |

|      |     |     |     |    |        |        |         |      |      |
|------|-----|-----|-----|----|--------|--------|---------|------|------|
| ATOM | 416 | O   | LEU | 26 | 81.240 | 52.006 | 99.869  | 0.00 | 0.00 |
| ATOM | 417 | N   | ALA | 27 | 82.470 | 53.490 | 98.726  | 0.00 | 0.00 |
| ATOM | 418 | H   | ALA | 27 | 82.598 | 53.952 | 97.838  | 0.00 | 0.00 |
| ATOM | 419 | CA  | ALA | 27 | 83.656 | 53.496 | 99.656  | 0.00 | 0.00 |
| ATOM | 420 | HA  | ALA | 27 | 83.853 | 52.522 | 100.103 | 0.00 | 0.00 |
| ATOM | 421 | CB  | ALA | 27 | 84.842 | 53.929 | 98.845  | 0.00 | 0.00 |
| ATOM | 422 | HB1 | ALA | 27 | 85.738 | 53.557 | 99.341  | 0.00 | 0.00 |
| ATOM | 423 | HB2 | ALA | 27 | 84.882 | 53.436 | 97.874  | 0.00 | 0.00 |
| ATOM | 424 | HB3 | ALA | 27 | 84.799 | 54.974 | 98.538  | 0.00 | 0.00 |
| ATOM | 425 | C   | ALA | 27 | 83.365 | 54.357 | 100.968 | 0.00 | 0.00 |
| ATOM | 426 | O   | ALA | 27 | 84.166 | 54.477 | 101.886 | 0.00 | 0.00 |
| ATOM | 427 | N   | ARG | 28 | 82.130 | 54.915 | 101.043 | 0.00 | 0.00 |
| ATOM | 428 | H   | ARG | 28 | 81.575 | 54.813 | 100.205 | 0.00 | 0.00 |
| ATOM | 429 | CA  | ARG | 28 | 81.531 | 55.499 | 102.214 | 0.00 | 0.00 |
| ATOM | 430 | HA  | ARG | 28 | 82.225 | 55.433 | 103.053 | 0.00 | 0.00 |
| ATOM | 431 | CB  | ARG | 28 | 81.247 | 56.931 | 101.870 | 0.00 | 0.00 |
| ATOM | 432 | HB2 | ARG | 28 | 81.861 | 57.338 | 101.067 | 0.00 | 0.00 |
| ATOM | 433 | HB3 | ARG | 28 | 80.270 | 56.933 | 101.387 | 0.00 | 0.00 |
| ATOM | 434 | CG  | ARG | 28 | 81.255 | 57.915 | 103.086 | 0.00 | 0.00 |
| ATOM | 435 | HG2 | ARG | 28 | 82.285 | 58.271 | 103.086 | 0.00 | 0.00 |
| ATOM | 436 | HG3 | ARG | 28 | 80.899 | 57.558 | 104.052 | 0.00 | 0.00 |
| ATOM | 437 | CD  | ARG | 28 | 80.468 | 59.234 | 102.849 | 0.00 | 0.00 |
| ATOM | 438 | HD2 | ARG | 28 | 79.398 | 59.036 | 102.902 | 0.00 | 0.00 |
| ATOM | 439 | HD3 | ARG | 28 | 80.803 | 59.870 | 103.669 | 0.00 | 0.00 |
| ATOM | 440 | NE  | ARG | 28 | 80.876 | 59.849 | 101.600 | 0.00 | 0.00 |
| ATOM | 441 | HE  | ARG | 28 | 81.842 | 60.116 | 101.475 | 0.00 | 0.00 |

ATOM 442 CZ ARG 28 80.008 60.021 100.588 0.00 0.00  
ATOM 443 NH1 ARG 28 78.723 60.011 100.648 0.00 0.00  
ATOM 444 1HH1 ARG 28 78.260 60.264 99.787 0.00 0.00  
ATOM 445 2HH1 ARG 28 78.332 60.188 101.563 0.00 0.00  
ATOM 446 NH2 ARG 28 80.526 60.289 99.391 0.00 0.00  
ATOM 447 1HH2 ARG 28 79.920 60.569 98.633 0.00 0.00  
ATOM 448 2HH2 ARG 28 81.528 60.339 99.278 0.00 0.00  
ATOM 449 C ARG 28 80.259 54.765 102.620 0.00 0.00  
ATOM 450 O ARG 28 79.458 55.281 103.390 0.00 0.00  
ATOM 451 N GLY 29 80.066 53.515 102.180 0.00 0.00  
ATOM 452 H GLY 29 80.703 53.171 101.476 0.00 0.00  
ATOM 453 CA GLY 29 79.011 52.646 102.612 0.00 0.00  
ATOM 454 HA2 GLY 29 79.159 51.673 102.143 0.00 0.00  
ATOM 455 HA3 GLY 29 79.065 52.583 103.699 0.00 0.00  
ATOM 456 C GLY 29 77.626 53.177 102.366 0.00 0.00  
ATOM 457 O GLY 29 76.712 52.878 103.128 0.00 0.00  
ATOM 458 N LEU 30 77.355 53.829 101.229 0.00 0.00  
ATOM 459 H LEU 30 78.116 54.263 100.726 0.00 0.00  
ATOM 460 CA LEU 30 76.040 53.878 100.639 0.00 0.00  
ATOM 461 HA LEU 30 75.300 54.020 101.426 0.00 0.00  
ATOM 462 CB LEU 30 75.901 55.106 99.750 0.00 0.00  
ATOM 463 HB2 LEU 30 76.628 55.071 98.939 0.00 0.00  
ATOM 464 HB3 LEU 30 75.026 55.021 99.106 0.00 0.00  
ATOM 465 CG LEU 30 75.892 56.412 100.507 0.00 0.00  
ATOM 466 HG LEU 30 75.768 57.209 99.773 0.00 0.00  
ATOM 467 CD1 LEU 30 74.731 56.557 101.514 0.00 0.00

|      |     |      |     |    |        |        |         |      |      |
|------|-----|------|-----|----|--------|--------|---------|------|------|
| ATOM | 468 | 1HD1 | LEU | 30 | 74.707 | 55.749 | 102.245 | 0.00 | 0.00 |
| ATOM | 469 | 2HD1 | LEU | 30 | 74.823 | 57.470 | 102.103 | 0.00 | 0.00 |
| ATOM | 470 | 3HD1 | LEU | 30 | 73.791 | 56.566 | 100.961 | 0.00 | 0.00 |
| ATOM | 471 | CD2  | LEU | 30 | 77.202 | 56.768 | 101.289 | 0.00 | 0.00 |
| ATOM | 472 | 1HD2 | LEU | 30 | 78.104 | 56.461 | 100.760 | 0.00 | 0.00 |
| ATOM | 473 | 2HD2 | LEU | 30 | 77.326 | 57.849 | 101.366 | 0.00 | 0.00 |
| ATOM | 474 | 3HD2 | LEU | 30 | 77.273 | 56.257 | 102.250 | 0.00 | 0.00 |
| ATOM | 475 | C    | LEU | 30 | 75.848 | 52.562 | 99.898  | 0.00 | 0.00 |
| ATOM | 476 | O    | LEU | 30 | 76.719 | 52.051 | 99.152  | 0.00 | 0.00 |
| ATOM | 477 | N    | LYS | 31 | 74.587 | 52.078 | 99.941  | 0.00 | 0.00 |
| ATOM | 478 | H    | LYS | 31 | 74.084 | 52.383 | 100.762 | 0.00 | 0.00 |
| ATOM | 479 | CA   | LYS | 31 | 74.043 | 51.090 | 98.975  | 0.00 | 0.00 |
| ATOM | 480 | HA   | LYS | 31 | 74.806 | 50.327 | 98.822  | 0.00 | 0.00 |
| ATOM | 481 | CB   | LYS | 31 | 72.807 | 50.412 | 99.661  | 0.00 | 0.00 |
| ATOM | 482 | HB2  | LYS | 31 | 72.045 | 51.162 | 99.872  | 0.00 | 0.00 |
| ATOM | 483 | HB3  | LYS | 31 | 72.384 | 49.672 | 98.981  | 0.00 | 0.00 |
| ATOM | 484 | CG   | LYS | 31 | 73.118 | 49.712 | 100.971 | 0.00 | 0.00 |
| ATOM | 485 | HG2  | LYS | 31 | 73.579 | 50.347 | 101.728 | 0.00 | 0.00 |
| ATOM | 486 | HG3  | LYS | 31 | 72.149 | 49.432 | 101.382 | 0.00 | 0.00 |
| ATOM | 487 | CD   | LYS | 31 | 73.948 | 48.438 | 100.885 | 0.00 | 0.00 |
| ATOM | 488 | HD2  | LYS | 31 | 73.398 | 47.791 | 100.202 | 0.00 | 0.00 |
| ATOM | 489 | HD3  | LYS | 31 | 74.880 | 48.710 | 100.388 | 0.00 | 0.00 |
| ATOM | 490 | CE   | LYS | 31 | 74.118 | 47.950 | 102.291 | 0.00 | 0.00 |
| ATOM | 491 | HE2  | LYS | 31 | 74.782 | 47.086 | 102.291 | 0.00 | 0.00 |
| ATOM | 492 | HE3  | LYS | 31 | 74.418 | 48.790 | 102.916 | 0.00 | 0.00 |
| ATOM | 493 | NZ   | LYS | 31 | 72.857 | 47.343 | 102.716 | 0.00 | 0.00 |

|      |     |      |     |    |        |        |         |      |      |
|------|-----|------|-----|----|--------|--------|---------|------|------|
| ATOM | 494 | HZ1  | LYS | 31 | 72.916 | 46.957 | 103.648 | 0.00 | 0.00 |
| ATOM | 495 | HZ2  | LYS | 31 | 72.174 | 48.087 | 102.687 | 0.00 | 0.00 |
| ATOM | 496 | HZ3  | LYS | 31 | 72.612 | 46.616 | 102.059 | 0.00 | 0.00 |
| ATOM | 497 | C    | LYS | 31 | 73.719 | 51.868 | 97.622  | 0.00 | 0.00 |
| ATOM | 498 | O    | LYS | 31 | 73.141 | 52.943 | 97.719  | 0.00 | 0.00 |
| ATOM | 499 | N    | LEU | 32 | 74.197 | 51.418 | 96.455  | 0.00 | 0.00 |
| ATOM | 500 | H    | LEU | 32 | 74.592 | 50.489 | 96.449  | 0.00 | 0.00 |
| ATOM | 501 | CA   | LEU | 32 | 74.169 | 52.153 | 95.276  | 0.00 | 0.00 |
| ATOM | 502 | HA   | LEU | 32 | 74.496 | 53.178 | 95.451  | 0.00 | 0.00 |
| ATOM | 503 | CB   | LEU | 32 | 75.179 | 51.614 | 94.314  | 0.00 | 0.00 |
| ATOM | 504 | HB2  | LEU | 32 | 74.873 | 50.569 | 94.364  | 0.00 | 0.00 |
| ATOM | 505 | HB3  | LEU | 32 | 75.047 | 52.092 | 93.343  | 0.00 | 0.00 |
| ATOM | 506 | CG   | LEU | 32 | 76.643 | 51.722 | 94.647  | 0.00 | 0.00 |
| ATOM | 507 | HG   | LEU | 32 | 76.986 | 50.899 | 95.273  | 0.00 | 0.00 |
| ATOM | 508 | CD1  | LEU | 32 | 77.512 | 51.566 | 93.370  | 0.00 | 0.00 |
| ATOM | 509 | 1HD1 | LEU | 32 | 77.032 | 52.045 | 92.517  | 0.00 | 0.00 |
| ATOM | 510 | 2HD1 | LEU | 32 | 78.546 | 51.799 | 93.626  | 0.00 | 0.00 |
| ATOM | 511 | 3HD1 | LEU | 32 | 77.461 | 50.503 | 93.134  | 0.00 | 0.00 |
| ATOM | 512 | CD2  | LEU | 32 | 77.015 | 53.037 | 95.358  | 0.00 | 0.00 |
| ATOM | 513 | 1HD2 | LEU | 32 | 76.819 | 53.903 | 94.725  | 0.00 | 0.00 |
| ATOM | 514 | 2HD2 | LEU | 32 | 76.497 | 52.955 | 96.313  | 0.00 | 0.00 |
| ATOM | 515 | 3HD2 | LEU | 32 | 78.090 | 53.000 | 95.536  | 0.00 | 0.00 |
| ATOM | 516 | C    | LEU | 32 | 72.761 | 52.213 | 94.699  | 0.00 | 0.00 |
| ATOM | 517 | O    | LEU | 32 | 72.052 | 51.169 | 94.833  | 0.00 | 0.00 |
| ATOM | 518 | N    | ASN | 33 | 72.198 | 53.302 | 94.140  | 0.00 | 0.00 |
| ATOM | 519 | H    | ASN | 33 | 72.915 | 54.007 | 94.044  | 0.00 | 0.00 |

|      |     |      |     |    |        |        |        |      |      |
|------|-----|------|-----|----|--------|--------|--------|------|------|
| ATOM | 520 | CA   | ASN | 33 | 70.923 | 53.461 | 93.434 | 0.00 | 0.00 |
| ATOM | 521 | HA   | ASN | 33 | 70.110 | 52.895 | 93.889 | 0.00 | 0.00 |
| ATOM | 522 | CB   | ASN | 33 | 70.550 | 55.015 | 93.622 | 0.00 | 0.00 |
| ATOM | 523 | HB2  | ASN | 33 | 69.470 | 55.158 | 93.659 | 0.00 | 0.00 |
| ATOM | 524 | HB3  | ASN | 33 | 71.018 | 55.370 | 94.540 | 0.00 | 0.00 |
| ATOM | 525 | CG   | ASN | 33 | 70.993 | 55.991 | 92.571 | 0.00 | 0.00 |
| ATOM | 526 | OD1  | ASN | 33 | 71.802 | 55.741 | 91.671 | 0.00 | 0.00 |
| ATOM | 527 | ND2  | ASN | 33 | 70.418 | 57.178 | 92.574 | 0.00 | 0.00 |
| ATOM | 528 | 1HD2 | ASN | 33 | 70.695 | 57.917 | 91.943 | 0.00 | 0.00 |
| ATOM | 529 | 2HD2 | ASN | 33 | 69.604 | 57.442 | 93.110 | 0.00 | 0.00 |
| ATOM | 530 | C    | ASN | 33 | 71.052 | 52.995 | 92.021 | 0.00 | 0.00 |
| ATOM | 531 | O    | ASN | 33 | 72.198 | 52.657 | 91.590 | 0.00 | 0.00 |
| ATOM | 532 | N    | TYR | 34 | 69.949 | 52.960 | 91.281 | 0.00 | 0.00 |
| ATOM | 533 | H    | TYR | 34 | 69.065 | 53.064 | 91.760 | 0.00 | 0.00 |
| ATOM | 534 | CA   | TYR | 34 | 69.909 | 52.483 | 89.918 | 0.00 | 0.00 |
| ATOM | 535 | HA   | TYR | 34 | 70.185 | 51.429 | 89.910 | 0.00 | 0.00 |
| ATOM | 536 | CB   | TYR | 34 | 68.465 | 52.435 | 89.442 | 0.00 | 0.00 |
| ATOM | 537 | HB2  | TYR | 34 | 67.887 | 51.729 | 90.038 | 0.00 | 0.00 |
| ATOM | 538 | HB3  | TYR | 34 | 67.982 | 53.383 | 89.682 | 0.00 | 0.00 |
| ATOM | 539 | CG   | TYR | 34 | 68.276 | 52.029 | 87.981 | 0.00 | 0.00 |
| ATOM | 540 | CD1  | TYR | 34 | 68.748 | 50.753 | 87.591 | 0.00 | 0.00 |
| ATOM | 541 | HD1  | TYR | 34 | 69.412 | 50.237 | 88.268 | 0.00 | 0.00 |
| ATOM | 542 | CE1  | TYR | 34 | 68.548 | 50.383 | 86.208 | 0.00 | 0.00 |
| ATOM | 543 | HE1  | TYR | 34 | 69.011 | 49.501 | 85.791 | 0.00 | 0.00 |
| ATOM | 544 | CZ   | TYR | 34 | 67.740 | 51.156 | 85.391 | 0.00 | 0.00 |
| ATOM | 545 | OH   | TYR | 34 | 67.479 | 50.745 | 84.101 | 0.00 | 0.00 |



|      |     |     |     |    |        |        |        |      |      |
|------|-----|-----|-----|----|--------|--------|--------|------|------|
| ATOM | 546 | HH  | TYR | 34 | 67.878 | 49.900 | 83.884 | 0.00 | 0.00 |
| ATOM | 547 | CE2 | TYR | 34 | 67.206 | 52.409 | 85.836 | 0.00 | 0.00 |
| ATOM | 548 | HE2 | TYR | 34 | 66.648 | 53.043 | 85.163 | 0.00 | 0.00 |
| ATOM | 549 | CD2 | TYR | 34 | 67.513 | 52.820 | 87.154 | 0.00 | 0.00 |
| ATOM | 550 | HD2 | TYR | 34 | 67.084 | 53.752 | 87.491 | 0.00 | 0.00 |
| ATOM | 551 | C   | TYR | 34 | 70.967 | 52.941 | 88.919 | 0.00 | 0.00 |
| ATOM | 552 | O   | TYR | 34 | 71.698 | 52.111 | 88.387 | 0.00 | 0.00 |
| ATOM | 553 | N   | PRO | 35 | 71.001 | 54.259 | 88.716 | 0.00 | 0.00 |
| ATOM | 554 | CD  | PRO | 35 | 70.057 | 55.250 | 89.207 | 0.00 | 0.00 |
| ATOM | 555 | HD2 | PRO | 35 | 69.071 | 55.206 | 88.744 | 0.00 | 0.00 |
| ATOM | 556 | HD3 | PRO | 35 | 69.908 | 55.144 | 90.281 | 0.00 | 0.00 |
| ATOM | 557 | CG  | PRO | 35 | 70.794 | 56.579 | 88.857 | 0.00 | 0.00 |
| ATOM | 558 | HG2 | PRO | 35 | 70.036 | 57.349 | 88.708 | 0.00 | 0.00 |
| ATOM | 559 | HG3 | PRO | 35 | 71.553 | 56.934 | 89.554 | 0.00 | 0.00 |
| ATOM | 560 | CB  | PRO | 35 | 71.528 | 56.347 | 87.573 | 0.00 | 0.00 |
| ATOM | 561 | HB2 | PRO | 35 | 70.868 | 56.308 | 86.707 | 0.00 | 0.00 |
| ATOM | 562 | HB3 | PRO | 35 | 72.323 | 57.081 | 87.436 | 0.00 | 0.00 |
| ATOM | 563 | CA  | PRO | 35 | 71.990 | 54.857 | 87.790 | 0.00 | 0.00 |
| ATOM | 564 | HA  | PRO | 35 | 71.794 | 54.345 | 86.848 | 0.00 | 0.00 |
| ATOM | 565 | C   | PRO | 35 | 73.459 | 54.729 | 88.227 | 0.00 | 0.00 |
| ATOM | 566 | O   | PRO | 35 | 74.325 | 54.372 | 87.411 | 0.00 | 0.00 |
| ATOM | 567 | N   | GLU | 36 | 73.828 | 55.064 | 89.472 | 0.00 | 0.00 |
| ATOM | 568 | H   | GLU | 36 | 73.110 | 55.456 | 90.065 | 0.00 | 0.00 |
| ATOM | 569 | CA  | GLU | 36 | 75.114 | 54.800 | 90.107 | 0.00 | 0.00 |
| ATOM | 570 | HA  | GLU | 36 | 75.866 | 55.499 | 89.740 | 0.00 | 0.00 |
| ATOM | 571 | CB  | GLU | 36 | 75.023 | 55.024 | 91.692 | 0.00 | 0.00 |

|      |     |     |     |    |        |        |        |      |      |
|------|-----|-----|-----|----|--------|--------|--------|------|------|
| ATOM | 572 | HB2 | GLU | 36 | 74.194 | 54.427 | 92.073 | 0.00 | 0.00 |
| ATOM | 573 | HB3 | GLU | 36 | 75.890 | 54.619 | 92.214 | 0.00 | 0.00 |
| ATOM | 574 | CG  | GLU | 36 | 74.915 | 56.458 | 92.214 | 0.00 | 0.00 |
| ATOM | 575 | HG2 | GLU | 36 | 75.864 | 56.951 | 92.005 | 0.00 | 0.00 |
| ATOM | 576 | HG3 | GLU | 36 | 74.247 | 57.011 | 91.553 | 0.00 | 0.00 |
| ATOM | 577 | CD  | GLU | 36 | 74.403 | 56.511 | 93.759 | 0.00 | 0.00 |
| ATOM | 578 | OE1 | GLU | 36 | 73.981 | 55.531 | 94.411 | 0.00 | 0.00 |
| ATOM | 579 | OE2 | GLU | 36 | 74.290 | 57.669 | 94.161 | 0.00 | 0.00 |
| ATOM | 580 | C   | GLU | 36 | 75.636 | 53.417 | 89.941 | 0.00 | 0.00 |
| ATOM | 581 | O   | GLU | 36 | 76.751 | 53.140 | 89.531 | 0.00 | 0.00 |
| ATOM | 582 | N   | SER | 37 | 74.826 | 52.345 | 90.225 | 0.00 | 0.00 |
| ATOM | 583 | H   | SER | 37 | 73.929 | 52.665 | 90.560 | 0.00 | 0.00 |
| ATOM | 584 | CA  | SER | 37 | 75.121 | 50.890 | 90.156 | 0.00 | 0.00 |
| ATOM | 585 | HA  | SER | 37 | 76.000 | 50.642 | 90.751 | 0.00 | 0.00 |
| ATOM | 586 | CB  | SER | 37 | 73.856 | 50.046 | 90.583 | 0.00 | 0.00 |
| ATOM | 587 | HB2 | SER | 37 | 73.026 | 50.218 | 89.898 | 0.00 | 0.00 |
| ATOM | 588 | HB3 | SER | 37 | 74.050 | 48.975 | 90.520 | 0.00 | 0.00 |
| ATOM | 589 | OG  | SER | 37 | 73.477 | 50.357 | 91.932 | 0.00 | 0.00 |
| ATOM | 590 | HG  | SER | 37 | 73.095 | 51.237 | 91.968 | 0.00 | 0.00 |
| ATOM | 591 | C   | SER | 37 | 75.524 | 50.414 | 88.744 | 0.00 | 0.00 |
| ATOM | 592 | O   | SER | 37 | 76.516 | 49.653 | 88.594 | 0.00 | 0.00 |
| ATOM | 593 | N   | VAL | 38 | 74.838 | 50.874 | 87.680 | 0.00 | 0.00 |
| ATOM | 594 | H   | VAL | 38 | 74.017 | 51.402 | 87.940 | 0.00 | 0.00 |
| ATOM | 595 | CA  | VAL | 38 | 75.125 | 50.477 | 86.319 | 0.00 | 0.00 |
| ATOM | 596 | HA  | VAL | 38 | 75.514 | 49.459 | 86.284 | 0.00 | 0.00 |
| ATOM | 597 | CB  | VAL | 38 | 73.914 | 50.535 | 85.420 | 0.00 | 0.00 |

|      |     |          |    |        |        |        |      |      |
|------|-----|----------|----|--------|--------|--------|------|------|
| ATOM | 598 | HB VAL   | 38 | 74.350 | 50.307 | 84.447 | 0.00 | 0.00 |
| ATOM | 599 | CG1 VAL  | 38 | 72.869 | 49.529 | 85.871 | 0.00 | 0.00 |
| ATOM | 600 | 1HG1 VAL | 38 | 73.252 | 48.552 | 86.167 | 0.00 | 0.00 |
| ATOM | 601 | 2HG1 VAL | 38 | 72.504 | 49.943 | 86.811 | 0.00 | 0.00 |
| ATOM | 602 | 3HG1 VAL | 38 | 72.055 | 49.465 | 85.149 | 0.00 | 0.00 |
| ATOM | 603 | CG2 VAL  | 38 | 73.231 | 51.910 | 85.274 | 0.00 | 0.00 |
| ATOM | 604 | 1HG2 VAL | 38 | 73.996 | 52.526 | 84.801 | 0.00 | 0.00 |
| ATOM | 605 | 2HG2 VAL | 38 | 72.429 | 51.848 | 84.539 | 0.00 | 0.00 |
| ATOM | 606 | 3HG2 VAL | 38 | 72.957 | 52.397 | 86.209 | 0.00 | 0.00 |
| ATOM | 607 | C VAL    | 38 | 76.261 | 51.294 | 85.736 | 0.00 | 0.00 |
| ATOM | 608 | O VAL    | 38 | 77.032 | 50.811 | 84.893 | 0.00 | 0.00 |
| ATOM | 609 | N ALA    | 39 | 76.344 | 52.540 | 86.205 | 0.00 | 0.00 |
| ATOM | 610 | H ALA    | 39 | 75.612 | 52.918 | 86.790 | 0.00 | 0.00 |
| ATOM | 611 | CA ALA   | 39 | 77.486 | 53.429 | 85.844 | 0.00 | 0.00 |
| ATOM | 612 | HA ALA   | 39 | 77.451 | 53.640 | 84.775 | 0.00 | 0.00 |
| ATOM | 613 | CB ALA   | 39 | 77.142 | 54.807 | 86.443 | 0.00 | 0.00 |
| ATOM | 614 | HB1 ALA  | 39 | 76.273 | 55.121 | 85.865 | 0.00 | 0.00 |
| ATOM | 615 | HB2 ALA  | 39 | 77.008 | 54.645 | 87.512 | 0.00 | 0.00 |
| ATOM | 616 | HB3 ALA  | 39 | 77.969 | 55.475 | 86.199 | 0.00 | 0.00 |
| ATOM | 617 | C ALA    | 39 | 78.825 | 52.779 | 86.263 | 0.00 | 0.00 |
| ATOM | 618 | O ALA    | 39 | 79.802 | 52.773 | 85.436 | 0.00 | 0.00 |
| ATOM | 619 | N LEU    | 40 | 78.897 | 52.169 | 87.475 | 0.00 | 0.00 |
| ATOM | 620 | H LEU    | 40 | 78.166 | 52.375 | 88.142 | 0.00 | 0.00 |
| ATOM | 621 | CA LEU   | 40 | 80.127 | 51.609 | 87.959 | 0.00 | 0.00 |
| ATOM | 622 | HA LEU   | 40 | 80.918 | 52.298 | 87.663 | 0.00 | 0.00 |
| ATOM | 623 | CB LEU   | 40 | 80.041 | 51.543 | 89.487 | 0.00 | 0.00 |

|      |     |      |     |    |        |        |        |      |      |
|------|-----|------|-----|----|--------|--------|--------|------|------|
| ATOM | 624 | HB2  | LEU | 40 | 79.765 | 52.557 | 89.777 | 0.00 | 0.00 |
| ATOM | 625 | HB3  | LEU | 40 | 79.253 | 50.866 | 89.814 | 0.00 | 0.00 |
| ATOM | 626 | CG   | LEU | 40 | 81.264 | 51.176 | 90.205 | 0.00 | 0.00 |
| ATOM | 627 | HG   | LEU | 40 | 81.551 | 50.155 | 89.954 | 0.00 | 0.00 |
| ATOM | 628 | CD1  | LEU | 40 | 82.508 | 52.094 | 89.882 | 0.00 | 0.00 |
| ATOM | 629 | 1HD1 | LEU | 40 | 83.282 | 51.932 | 90.633 | 0.00 | 0.00 |
| ATOM | 630 | 2HD1 | LEU | 40 | 82.741 | 51.905 | 88.834 | 0.00 | 0.00 |
| ATOM | 631 | 3HD1 | LEU | 40 | 82.278 | 53.156 | 89.794 | 0.00 | 0.00 |
| ATOM | 632 | CD2  | LEU | 40 | 80.960 | 51.297 | 91.757 | 0.00 | 0.00 |
| ATOM | 633 | 1HD2 | LEU | 40 | 81.875 | 51.093 | 92.314 | 0.00 | 0.00 |
| ATOM | 634 | 2HD2 | LEU | 40 | 80.736 | 52.343 | 91.967 | 0.00 | 0.00 |
| ATOM | 635 | 3HD2 | LEU | 40 | 80.139 | 50.652 | 92.069 | 0.00 | 0.00 |
| ATOM | 636 | C    | LEU | 40 | 80.536 | 50.221 | 87.308 | 0.00 | 0.00 |
| ATOM | 637 | O    | LEU | 40 | 81.743 | 50.005 | 87.137 | 0.00 | 0.00 |
| ATOM | 638 | N    | ILE | 41 | 79.558 | 49.344 | 87.032 | 0.00 | 0.00 |
| ATOM | 639 | H    | ILE | 41 | 78.598 | 49.524 | 87.287 | 0.00 | 0.00 |
| ATOM | 640 | CA   | ILE | 41 | 79.970 | 48.147 | 86.278 | 0.00 | 0.00 |
| ATOM | 641 | HA   | ILE | 41 | 80.940 | 47.746 | 86.574 | 0.00 | 0.00 |
| ATOM | 642 | CB   | ILE | 41 | 78.916 | 47.032 | 86.496 | 0.00 | 0.00 |
| ATOM | 643 | HB   | ILE | 41 | 79.120 | 46.155 | 85.883 | 0.00 | 0.00 |
| ATOM | 644 | CG2  | ILE | 41 | 78.970 | 46.596 | 87.972 | 0.00 | 0.00 |
| ATOM | 645 | 1HG2 | ILE | 41 | 78.542 | 45.594 | 87.973 | 0.00 | 0.00 |
| ATOM | 646 | 2HG2 | ILE | 41 | 79.998 | 46.521 | 88.325 | 0.00 | 0.00 |
| ATOM | 647 | 3HG2 | ILE | 41 | 78.375 | 47.231 | 88.629 | 0.00 | 0.00 |
| ATOM | 648 | CG1  | ILE | 41 | 77.458 | 47.369 | 86.132 | 0.00 | 0.00 |
| ATOM | 649 | 2HG1 | ILE | 41 | 77.117 | 48.159 | 86.800 | 0.00 | 0.00 |

|      |     |      |     |    |        |        |        |      |      |
|------|-----|------|-----|----|--------|--------|--------|------|------|
| ATOM | 650 | 3HG1 | ILE | 41 | 77.380 | 47.853 | 85.158 | 0.00 | 0.00 |
| ATOM | 651 | CD1  | ILE | 41 | 76.310 | 46.399 | 86.256 | 0.00 | 0.00 |
| ATOM | 652 | 1HD1 | ILE | 41 | 76.285 | 46.136 | 87.313 | 0.00 | 0.00 |
| ATOM | 653 | 2HD1 | ILE | 41 | 75.357 | 46.877 | 86.029 | 0.00 | 0.00 |
| ATOM | 654 | 3HD1 | ILE | 41 | 76.422 | 45.583 | 85.542 | 0.00 | 0.00 |
| ATOM | 655 | C    | ILE | 41 | 80.157 | 48.335 | 84.758 | 0.00 | 0.00 |
| ATOM | 656 | O    | ILE | 41 | 81.024 | 47.706 | 84.106 | 0.00 | 0.00 |
| ATOM | 657 | N    | SER | 42 | 79.517 | 49.334 | 84.123 | 0.00 | 0.00 |
| ATOM | 658 | H    | SER | 42 | 78.770 | 49.839 | 84.578 | 0.00 | 0.00 |
| ATOM | 659 | CA   | SER | 42 | 79.649 | 49.648 | 82.699 | 0.00 | 0.00 |
| ATOM | 660 | HA   | SER | 42 | 79.604 | 48.749 | 82.084 | 0.00 | 0.00 |
| ATOM | 661 | CB   | SER | 42 | 78.624 | 50.588 | 82.190 | 0.00 | 0.00 |
| ATOM | 662 | HB2  | SER | 42 | 78.658 | 51.550 | 82.701 | 0.00 | 0.00 |
| ATOM | 663 | HB3  | SER | 42 | 78.853 | 50.690 | 81.129 | 0.00 | 0.00 |
| ATOM | 664 | OG   | SER | 42 | 77.324 | 50.030 | 82.374 | 0.00 | 0.00 |
| ATOM | 665 | HG   | SER | 42 | 76.874 | 50.499 | 83.079 | 0.00 | 0.00 |
| ATOM | 666 | C    | SER | 42 | 80.983 | 50.352 | 82.413 | 0.00 | 0.00 |
| ATOM | 667 | O    | SER | 42 | 81.479 | 50.097 | 81.316 | 0.00 | 0.00 |
| ATOM | 668 | N    | ALA | 43 | 81.533 | 51.155 | 83.348 | 0.00 | 0.00 |
| ATOM | 669 | H    | ALA | 43 | 81.023 | 51.458 | 84.166 | 0.00 | 0.00 |
| ATOM | 670 | CA   | ALA | 43 | 82.928 | 51.558 | 83.326 | 0.00 | 0.00 |
| ATOM | 671 | HA   | ALA | 43 | 83.058 | 51.999 | 82.338 | 0.00 | 0.00 |
| ATOM | 672 | CB   | ALA | 43 | 83.155 | 52.656 | 84.425 | 0.00 | 0.00 |
| ATOM | 673 | HB1  | ALA | 43 | 82.683 | 53.571 | 84.068 | 0.00 | 0.00 |
| ATOM | 674 | HB2  | ALA | 43 | 82.755 | 52.292 | 85.371 | 0.00 | 0.00 |
| ATOM | 675 | HB3  | ALA | 43 | 84.211 | 52.925 | 84.465 | 0.00 | 0.00 |

|      |     |     |     |    |        |        |        |      |      |
|------|-----|-----|-----|----|--------|--------|--------|------|------|
| ATOM | 676 | C   | ALA | 43 | 83.964 | 50.401 | 83.476 | 0.00 | 0.00 |
| ATOM | 677 | O   | ALA | 43 | 84.862 | 50.306 | 82.727 | 0.00 | 0.00 |
| ATOM | 678 | N   | PHE | 44 | 83.773 | 49.506 | 84.460 | 0.00 | 0.00 |
| ATOM | 679 | H   | PHE | 44 | 82.960 | 49.635 | 85.046 | 0.00 | 0.00 |
| ATOM | 680 | CA  | PHE | 44 | 84.572 | 48.338 | 84.702 | 0.00 | 0.00 |
| ATOM | 681 | HA  | PHE | 44 | 85.535 | 48.635 | 85.117 | 0.00 | 0.00 |
| ATOM | 682 | CB  | PHE | 44 | 83.919 | 47.619 | 85.940 | 0.00 | 0.00 |
| ATOM | 683 | HB2 | PHE | 44 | 83.618 | 48.289 | 86.745 | 0.00 | 0.00 |
| ATOM | 684 | HB3 | PHE | 44 | 82.968 | 47.202 | 85.607 | 0.00 | 0.00 |
| ATOM | 685 | CG  | PHE | 44 | 84.918 | 46.564 | 86.458 | 0.00 | 0.00 |
| ATOM | 686 | CD1 | PHE | 44 | 85.773 | 46.945 | 87.520 | 0.00 | 0.00 |
| ATOM | 687 | HD1 | PHE | 44 | 85.677 | 47.859 | 88.088 | 0.00 | 0.00 |
| ATOM | 688 | CE1 | PHE | 44 | 86.625 | 46.012 | 88.095 | 0.00 | 0.00 |
| ATOM | 689 | HE1 | PHE | 44 | 87.271 | 46.225 | 88.934 | 0.00 | 0.00 |
| ATOM | 690 | CZ  | PHE | 44 | 86.850 | 44.786 | 87.422 | 0.00 | 0.00 |
| ATOM | 691 | HZ  | PHE | 44 | 87.521 | 44.005 | 87.748 | 0.00 | 0.00 |
| ATOM | 692 | CE2 | PHE | 44 | 85.997 | 44.388 | 86.418 | 0.00 | 0.00 |
| ATOM | 693 | HE2 | PHE | 44 | 86.145 | 43.426 | 85.950 | 0.00 | 0.00 |
| ATOM | 694 | CD2 | PHE | 44 | 85.042 | 45.278 | 85.843 | 0.00 | 0.00 |
| ATOM | 695 | HD2 | PHE | 44 | 84.432 | 44.930 | 85.023 | 0.00 | 0.00 |
| ATOM | 696 | C   | PHE | 44 | 84.904 | 47.411 | 83.492 | 0.00 | 0.00 |
| ATOM | 697 | O   | PHE | 44 | 86.067 | 47.097 | 83.337 | 0.00 | 0.00 |
| ATOM | 698 | N   | ILE | 45 | 83.898 | 47.301 | 82.636 | 0.00 | 0.00 |
| ATOM | 699 | H   | ILE | 45 | 83.074 | 47.812 | 82.917 | 0.00 | 0.00 |
| ATOM | 700 | CA  | ILE | 45 | 84.091 | 46.445 | 81.443 | 0.00 | 0.00 |
| ATOM | 701 | HA  | ILE | 45 | 84.733 | 45.586 | 81.641 | 0.00 | 0.00 |

|      |     |      |     |    |        |        |        |      |      |
|------|-----|------|-----|----|--------|--------|--------|------|------|
| ATOM | 702 | CB   | ILE | 45 | 82.810 | 45.754 | 80.989 | 0.00 | 0.00 |
| ATOM | 703 | HB   | ILE | 45 | 83.027 | 45.307 | 80.019 | 0.00 | 0.00 |
| ATOM | 704 | CG2  | ILE | 45 | 82.335 | 44.791 | 82.094 | 0.00 | 0.00 |
| ATOM | 705 | 1HG2 | ILE | 45 | 83.069 | 44.105 | 82.518 | 0.00 | 0.00 |
| ATOM | 706 | 2HG2 | ILE | 45 | 81.891 | 45.206 | 82.999 | 0.00 | 0.00 |
| ATOM | 707 | 3HG2 | ILE | 45 | 81.674 | 44.048 | 81.650 | 0.00 | 0.00 |
| ATOM | 708 | CG1  | ILE | 45 | 81.666 | 46.773 | 80.702 | 0.00 | 0.00 |
| ATOM | 709 | 2HG1 | ILE | 45 | 81.432 | 47.417 | 81.550 | 0.00 | 0.00 |
| ATOM | 710 | 3HG1 | ILE | 45 | 82.103 | 47.401 | 79.926 | 0.00 | 0.00 |
| ATOM | 711 | CD1  | ILE | 45 | 80.348 | 46.118 | 80.307 | 0.00 | 0.00 |
| ATOM | 712 | 1HD1 | ILE | 45 | 79.588 | 46.829 | 79.985 | 0.00 | 0.00 |
| ATOM | 713 | 2HD1 | ILE | 45 | 80.523 | 45.396 | 79.509 | 0.00 | 0.00 |
| ATOM | 714 | 3HD1 | ILE | 45 | 79.919 | 45.643 | 81.189 | 0.00 | 0.00 |
| ATOM | 715 | C    | ILE | 45 | 84.701 | 47.323 | 80.269 | 0.00 | 0.00 |
| ATOM | 716 | O    | ILE | 45 | 85.386 | 46.749 | 79.387 | 0.00 | 0.00 |
| ATOM | 717 | N    | MET | 46 | 84.476 | 48.669 | 80.196 | 0.00 | 0.00 |
| ATOM | 718 | H    | MET | 46 | 83.931 | 49.060 | 80.951 | 0.00 | 0.00 |
| ATOM | 719 | CA   | MET | 46 | 85.129 | 49.565 | 79.235 | 0.00 | 0.00 |
| ATOM | 720 | HA   | MET | 46 | 85.045 | 49.098 | 78.253 | 0.00 | 0.00 |
| ATOM | 721 | CB   | MET | 46 | 84.317 | 50.911 | 79.377 | 0.00 | 0.00 |
| ATOM | 722 | HB2  | MET | 46 | 83.252 | 50.702 | 79.281 | 0.00 | 0.00 |
| ATOM | 723 | HB3  | MET | 46 | 84.418 | 51.355 | 80.368 | 0.00 | 0.00 |
| ATOM | 724 | CG   | MET | 46 | 84.626 | 51.991 | 78.354 | 0.00 | 0.00 |
| ATOM | 725 | HG2  | MET | 46 | 85.667 | 52.313 | 78.375 | 0.00 | 0.00 |
| ATOM | 726 | HG3  | MET | 46 | 84.499 | 51.486 | 77.396 | 0.00 | 0.00 |
| ATOM | 727 | SD   | MET | 46 | 83.768 | 53.593 | 78.358 | 0.00 | 0.00 |

|      |     |     |     |    |        |        |        |      |      |
|------|-----|-----|-----|----|--------|--------|--------|------|------|
| ATOM | 728 | CE  | MET | 46 | 82.266 | 53.410 | 77.382 | 0.00 | 0.00 |
| ATOM | 729 | HE1 | MET | 46 | 81.670 | 54.297 | 77.598 | 0.00 | 0.00 |
| ATOM | 730 | HE2 | MET | 46 | 82.382 | 53.412 | 76.298 | 0.00 | 0.00 |
| ATOM | 731 | HE3 | MET | 46 | 81.729 | 52.539 | 77.756 | 0.00 | 0.00 |
| ATOM | 732 | C   | MET | 46 | 86.660 | 49.719 | 79.653 | 0.00 | 0.00 |
| ATOM | 733 | O   | MET | 46 | 87.501 | 49.791 | 78.761 | 0.00 | 0.00 |
| ATOM | 734 | N   | GLU | 47 | 86.962 | 49.826 | 80.954 | 0.00 | 0.00 |
| ATOM | 735 | H   | GLU | 47 | 86.210 | 49.962 | 81.615 | 0.00 | 0.00 |
| ATOM | 736 | CA  | GLU | 47 | 88.372 | 49.885 | 81.484 | 0.00 | 0.00 |
| ATOM | 737 | HA  | GLU | 47 | 88.881 | 50.669 | 80.924 | 0.00 | 0.00 |
| ATOM | 738 | CB  | GLU | 47 | 88.493 | 50.293 | 82.929 | 0.00 | 0.00 |
| ATOM | 739 | HB2 | GLU | 47 | 88.048 | 49.552 | 83.593 | 0.00 | 0.00 |
| ATOM | 740 | HB3 | GLU | 47 | 89.526 | 50.377 | 83.267 | 0.00 | 0.00 |
| ATOM | 741 | CG  | GLU | 47 | 87.893 | 51.633 | 83.369 | 0.00 | 0.00 |
| ATOM | 742 | HG2 | GLU | 47 | 86.822 | 51.671 | 83.173 | 0.00 | 0.00 |
| ATOM | 743 | HG3 | GLU | 47 | 87.975 | 51.700 | 84.453 | 0.00 | 0.00 |
| ATOM | 744 | CD  | GLU | 47 | 88.562 | 52.894 | 82.714 | 0.00 | 0.00 |
| ATOM | 745 | OE1 | GLU | 47 | 89.778 | 53.138 | 83.026 | 0.00 | 0.00 |
| ATOM | 746 | OE2 | GLU | 47 | 87.974 | 53.715 | 82.009 | 0.00 | 0.00 |
| ATOM | 747 | C   | GLU | 47 | 89.219 | 48.711 | 81.079 | 0.00 | 0.00 |
| ATOM | 748 | O   | GLU | 47 | 90.416 | 48.854 | 81.011 | 0.00 | 0.00 |
| ATOM | 749 | N   | GLY | 48 | 88.625 | 47.536 | 80.853 | 0.00 | 0.00 |
| ATOM | 750 | H   | GLY | 48 | 87.705 | 47.467 | 81.263 | 0.00 | 0.00 |
| ATOM | 751 | CA  | GLY | 48 | 89.360 | 46.406 | 80.333 | 0.00 | 0.00 |
| ATOM | 752 | HA2 | GLY | 48 | 90.362 | 46.290 | 80.746 | 0.00 | 0.00 |
| ATOM | 753 | HA3 | GLY | 48 | 88.764 | 45.523 | 80.568 | 0.00 | 0.00 |



|      |     |     |     |    |        |        |        |      |      |
|------|-----|-----|-----|----|--------|--------|--------|------|------|
| ATOM | 754 | C   | GLY | 48 | 89.528 | 46.393 | 78.747 | 0.00 | 0.00 |
| ATOM | 755 | O   | GLY | 48 | 90.448 | 45.697 | 78.297 | 0.00 | 0.00 |
| ATOM | 756 | N   | ALA | 49 | 88.762 | 47.156 | 77.968 | 0.00 | 0.00 |
| ATOM | 757 | H   | ALA | 49 | 88.080 | 47.730 | 78.443 | 0.00 | 0.00 |
| ATOM | 758 | CA  | ALA | 49 | 89.004 | 47.339 | 76.579 | 0.00 | 0.00 |
| ATOM | 759 | HA  | ALA | 49 | 89.358 | 46.391 | 76.174 | 0.00 | 0.00 |
| ATOM | 760 | CB  | ALA | 49 | 87.756 | 47.856 | 75.837 | 0.00 | 0.00 |
| ATOM | 761 | HB1 | ALA | 49 | 87.346 | 48.739 | 76.328 | 0.00 | 0.00 |
| ATOM | 762 | HB2 | ALA | 49 | 87.973 | 47.835 | 74.770 | 0.00 | 0.00 |
| ATOM | 763 | HB3 | ALA | 49 | 86.897 | 47.200 | 75.977 | 0.00 | 0.00 |
| ATOM | 764 | C   | ALA | 49 | 90.085 | 48.327 | 76.327 | 0.00 | 0.00 |
| ATOM | 765 | O   | ALA | 49 | 90.887 | 48.117 | 75.444 | 0.00 | 0.00 |
| ATOM | 766 | N   | ARG | 50 | 90.273 | 49.333 | 77.174 | 0.00 | 0.00 |
| ATOM | 767 | H   | ARG | 50 | 89.511 | 49.522 | 77.809 | 0.00 | 0.00 |
| ATOM | 768 | CA  | ARG | 50 | 91.537 | 50.199 | 77.226 | 0.00 | 0.00 |
| ATOM | 769 | HA  | ARG | 50 | 91.748 | 50.418 | 76.179 | 0.00 | 0.00 |
| ATOM | 770 | CB  | ARG | 50 | 91.195 | 51.373 | 78.143 | 0.00 | 0.00 |
| ATOM | 771 | HB2 | ARG | 50 | 90.468 | 52.099 | 77.778 | 0.00 | 0.00 |
| ATOM | 772 | HB3 | ARG | 50 | 90.692 | 51.026 | 79.045 | 0.00 | 0.00 |
| ATOM | 773 | CG  | ARG | 50 | 92.314 | 52.270 | 78.540 | 0.00 | 0.00 |
| ATOM | 774 | HG2 | ARG | 50 | 91.977 | 53.093 | 79.169 | 0.00 | 0.00 |
| ATOM | 775 | HG3 | ARG | 50 | 93.119 | 51.743 | 79.054 | 0.00 | 0.00 |
| ATOM | 776 | CD  | ARG | 50 | 92.904 | 52.975 | 77.326 | 0.00 | 0.00 |
| ATOM | 777 | HD2 | ARG | 50 | 93.096 | 52.364 | 76.443 | 0.00 | 0.00 |
| ATOM | 778 | HD3 | ARG | 50 | 92.229 | 53.758 | 76.979 | 0.00 | 0.00 |
| ATOM | 779 | NE  | ARG | 50 | 94.229 | 53.539 | 77.714 | 0.00 | 0.00 |

|      |     |      |     |    |        |        |        |      |      |
|------|-----|------|-----|----|--------|--------|--------|------|------|
| ATOM | 780 | HE   | ARG | 50 | 94.259 | 54.511 | 77.986 | 0.00 | 0.00 |
| ATOM | 781 | CZ   | ARG | 50 | 95.331 | 52.925 | 77.870 | 0.00 | 0.00 |
| ATOM | 782 | NH1  | ARG | 50 | 95.651 | 51.727 | 77.576 | 0.00 | 0.00 |
| ATOM | 783 | 1HH1 | ARG | 50 | 96.487 | 51.207 | 77.803 | 0.00 | 0.00 |
| ATOM | 784 | 2HH1 | ARG | 50 | 94.908 | 51.141 | 77.224 | 0.00 | 0.00 |
| ATOM | 785 | NH2  | ARG | 50 | 96.214 | 53.640 | 78.444 | 0.00 | 0.00 |
| ATOM | 786 | 1HH2 | ARG | 50 | 97.164 | 53.306 | 78.520 | 0.00 | 0.00 |
| ATOM | 787 | 2HH2 | ARG | 50 | 95.966 | 54.618 | 78.471 | 0.00 | 0.00 |
| ATOM | 788 | C    | ARG | 50 | 92.762 | 49.340 | 77.729 | 0.00 | 0.00 |
| ATOM | 789 | O    | ARG | 50 | 93.892 | 49.632 | 77.311 | 0.00 | 0.00 |
| ATOM | 790 | N    | ASP | 51 | 92.563 | 48.370 | 78.598 | 0.00 | 0.00 |
| ATOM | 791 | H    | ASP | 51 | 91.635 | 48.362 | 78.995 | 0.00 | 0.00 |
| ATOM | 792 | CA   | ASP | 51 | 93.586 | 47.348 | 79.074 | 0.00 | 0.00 |
| ATOM | 793 | HA   | ASP | 51 | 94.511 | 47.921 | 79.124 | 0.00 | 0.00 |
| ATOM | 794 | CB   | ASP | 51 | 93.337 | 46.951 | 80.552 | 0.00 | 0.00 |
| ATOM | 795 | HB2  | ASP | 51 | 93.145 | 47.918 | 81.019 | 0.00 | 0.00 |
| ATOM | 796 | HB3  | ASP | 51 | 92.450 | 46.318 | 80.557 | 0.00 | 0.00 |
| ATOM | 797 | CG   | ASP | 51 | 94.508 | 46.248 | 81.218 | 0.00 | 0.00 |
| ATOM | 798 | OD1  | ASP | 51 | 94.263 | 45.385 | 82.140 | 0.00 | 0.00 |
| ATOM | 799 | OD2  | ASP | 51 | 95.697 | 46.639 | 80.983 | 0.00 | 0.00 |
| ATOM | 800 | C    | ASP | 51 | 93.822 | 46.168 | 78.164 | 0.00 | 0.00 |
| ATOM | 801 | O    | ASP | 51 | 94.381 | 45.154 | 78.484 | 0.00 | 0.00 |
| ATOM | 802 | N    | GLY | 52 | 93.359 | 46.255 | 76.912 | 0.00 | 0.00 |
| ATOM | 803 | H    | GLY | 52 | 92.773 | 47.029 | 76.630 | 0.00 | 0.00 |
| ATOM | 804 | CA   | GLY | 52 | 93.657 | 45.201 | 75.923 | 0.00 | 0.00 |
| ATOM | 805 | HA2  | GLY | 52 | 93.467 | 45.592 | 74.924 | 0.00 | 0.00 |

|      |     |     |     |    |        |        |        |      |      |
|------|-----|-----|-----|----|--------|--------|--------|------|------|
| ATOM | 806 | HA3 | GLY | 52 | 94.709 | 44.916 | 75.915 | 0.00 | 0.00 |
| ATOM | 807 | C   | GLY | 52 | 92.960 | 43.863 | 75.990 | 0.00 | 0.00 |
| ATOM | 808 | O   | GLY | 52 | 93.486 | 42.895 | 75.401 | 0.00 | 0.00 |
| ATOM | 809 | N   | LYS | 53 | 91.780 | 43.728 | 76.645 | 0.00 | 0.00 |
| ATOM | 810 | H   | LYS | 53 | 91.415 | 44.573 | 77.061 | 0.00 | 0.00 |
| ATOM | 811 | CA  | LYS | 53 | 91.169 | 42.448 | 76.814 | 0.00 | 0.00 |
| ATOM | 812 | HA  | LYS | 53 | 91.858 | 41.605 | 76.763 | 0.00 | 0.00 |
| ATOM | 813 | CB  | LYS | 53 | 90.365 | 42.330 | 78.111 | 0.00 | 0.00 |
| ATOM | 814 | HB2 | LYS | 53 | 89.797 | 43.230 | 78.350 | 0.00 | 0.00 |
| ATOM | 815 | HB3 | LYS | 53 | 89.706 | 41.483 | 77.921 | 0.00 | 0.00 |
| ATOM | 816 | CG  | LYS | 53 | 91.208 | 41.957 | 79.372 | 0.00 | 0.00 |
| ATOM | 817 | HG2 | LYS | 53 | 91.926 | 41.197 | 79.061 | 0.00 | 0.00 |
| ATOM | 818 | HG3 | LYS | 53 | 90.519 | 41.512 | 80.090 | 0.00 | 0.00 |
| ATOM | 819 | CD  | LYS | 53 | 92.095 | 43.066 | 79.896 | 0.00 | 0.00 |
| ATOM | 820 | HD2 | LYS | 53 | 92.838 | 43.419 | 79.181 | 0.00 | 0.00 |
| ATOM | 821 | HD3 | LYS | 53 | 91.506 | 43.948 | 80.146 | 0.00 | 0.00 |
| ATOM | 822 | CE  | LYS | 53 | 92.995 | 42.674 | 81.122 | 0.00 | 0.00 |
| ATOM | 823 | HE2 | LYS | 53 | 93.393 | 43.444 | 81.783 | 0.00 | 0.00 |
| ATOM | 824 | HE3 | LYS | 53 | 92.369 | 42.105 | 81.809 | 0.00 | 0.00 |
| ATOM | 825 | NZ  | LYS | 53 | 94.119 | 41.803 | 80.722 | 0.00 | 0.00 |
| ATOM | 826 | HZ1 | LYS | 53 | 93.744 | 40.964 | 80.304 | 0.00 | 0.00 |
| ATOM | 827 | HZ2 | LYS | 53 | 94.755 | 42.121 | 80.004 | 0.00 | 0.00 |
| ATOM | 828 | HZ3 | LYS | 53 | 94.639 | 41.484 | 81.527 | 0.00 | 0.00 |
| ATOM | 829 | C   | LYS | 53 | 90.190 | 42.307 | 75.658 | 0.00 | 0.00 |
| ATOM | 830 | O   | LYS | 53 | 89.823 | 43.272 | 75.013 | 0.00 | 0.00 |
| ATOM | 831 | N   | SER | 54 | 89.897 | 41.067 | 75.305 | 0.00 | 0.00 |

|      |     |      |     |    |        |        |        |      |      |
|------|-----|------|-----|----|--------|--------|--------|------|------|
| ATOM | 832 | H    | SER | 54 | 90.206 | 40.317 | 75.907 | 0.00 | 0.00 |
| ATOM | 833 | CA   | SER | 54 | 89.047 | 40.786 | 74.140 | 0.00 | 0.00 |
| ATOM | 834 | HA   | SER | 54 | 88.985 | 41.635 | 73.460 | 0.00 | 0.00 |
| ATOM | 835 | CB   | SER | 54 | 89.431 | 39.586 | 73.315 | 0.00 | 0.00 |
| ATOM | 836 | HB2  | SER | 54 | 89.542 | 38.739 | 73.991 | 0.00 | 0.00 |
| ATOM | 837 | HB3  | SER | 54 | 88.653 | 39.339 | 72.593 | 0.00 | 0.00 |
| ATOM | 838 | OG   | SER | 54 | 90.660 | 39.779 | 72.674 | 0.00 | 0.00 |
| ATOM | 839 | HG   | SER | 54 | 91.372 | 39.218 | 72.988 | 0.00 | 0.00 |
| ATOM | 840 | C    | SER | 54 | 87.638 | 40.631 | 74.593 | 0.00 | 0.00 |
| ATOM | 841 | O    | SER | 54 | 87.345 | 40.327 | 75.743 | 0.00 | 0.00 |
| ATOM | 842 | N    | VAL | 55 | 86.639 | 40.791 | 73.703 | 0.00 | 0.00 |
| ATOM | 843 | H    | VAL | 55 | 86.836 | 41.117 | 72.768 | 0.00 | 0.00 |
| ATOM | 844 | CA   | VAL | 55 | 85.230 | 41.072 | 74.033 | 0.00 | 0.00 |
| ATOM | 845 | HA   | VAL | 55 | 85.241 | 41.841 | 74.806 | 0.00 | 0.00 |
| ATOM | 846 | CB   | VAL | 55 | 84.339 | 41.581 | 72.870 | 0.00 | 0.00 |
| ATOM | 847 | HB   | VAL | 55 | 83.356 | 41.841 | 73.262 | 0.00 | 0.00 |
| ATOM | 848 | CG1  | VAL | 55 | 84.824 | 42.921 | 72.288 | 0.00 | 0.00 |
| ATOM | 849 | 1HG1 | VAL | 55 | 84.902 | 43.685 | 73.061 | 0.00 | 0.00 |
| ATOM | 850 | 2HG1 | VAL | 55 | 85.760 | 42.873 | 71.732 | 0.00 | 0.00 |
| ATOM | 851 | 3HG1 | VAL | 55 | 84.196 | 43.212 | 71.445 | 0.00 | 0.00 |
| ATOM | 852 | CG2  | VAL | 55 | 84.066 | 40.538 | 71.786 | 0.00 | 0.00 |
| ATOM | 853 | 1HG2 | VAL | 55 | 85.016 | 40.197 | 71.373 | 0.00 | 0.00 |
| ATOM | 854 | 2HG2 | VAL | 55 | 83.461 | 39.756 | 72.245 | 0.00 | 0.00 |
| ATOM | 855 | 3HG2 | VAL | 55 | 83.479 | 41.007 | 70.997 | 0.00 | 0.00 |
| ATOM | 856 | C    | VAL | 55 | 84.645 | 39.884 | 74.789 | 0.00 | 0.00 |
| ATOM | 857 | O    | VAL | 55 | 83.992 | 40.025 | 75.805 | 0.00 | 0.00 |

|      |     |     |     |    |        |        |        |      |      |
|------|-----|-----|-----|----|--------|--------|--------|------|------|
| ATOM | 858 | N   | ALA | 56 | 85.040 | 38.645 | 74.341 | 0.00 | 0.00 |
| ATOM | 859 | H   | ALA | 56 | 85.609 | 38.562 | 73.511 | 0.00 | 0.00 |
| ATOM | 860 | CA  | ALA | 56 | 84.625 | 37.415 | 75.007 | 0.00 | 0.00 |
| ATOM | 861 | HA  | ALA | 56 | 83.542 | 37.357 | 74.902 | 0.00 | 0.00 |
| ATOM | 862 | CB  | ALA | 56 | 85.247 | 36.192 | 74.292 | 0.00 | 0.00 |
| ATOM | 863 | HB1 | ALA | 56 | 86.336 | 36.194 | 74.341 | 0.00 | 0.00 |
| ATOM | 864 | HB2 | ALA | 56 | 85.021 | 35.227 | 74.746 | 0.00 | 0.00 |
| ATOM | 865 | HB3 | ALA | 56 | 84.919 | 36.316 | 73.260 | 0.00 | 0.00 |
| ATOM | 866 | C   | ALA | 56 | 84.949 | 37.356 | 76.452 | 0.00 | 0.00 |
| ATOM | 867 | O   | ALA | 56 | 84.026 | 37.046 | 77.231 | 0.00 | 0.00 |
| ATOM | 868 | N   | SER | 57 | 86.212 | 37.671 | 76.867 | 0.00 | 0.00 |
| ATOM | 869 | H   | SER | 57 | 86.977 | 37.687 | 76.209 | 0.00 | 0.00 |
| ATOM | 870 | CA  | SER | 57 | 86.562 | 37.797 | 78.288 | 0.00 | 0.00 |
| ATOM | 871 | HA  | SER | 57 | 86.447 | 36.805 | 78.724 | 0.00 | 0.00 |
| ATOM | 872 | CB  | SER | 57 | 88.062 | 38.227 | 78.433 | 0.00 | 0.00 |
| ATOM | 873 | HB2 | SER | 57 | 88.598 | 37.434 | 77.911 | 0.00 | 0.00 |
| ATOM | 874 | HB3 | SER | 57 | 88.228 | 39.280 | 78.207 | 0.00 | 0.00 |
| ATOM | 875 | OG  | SER | 57 | 88.479 | 38.107 | 79.748 | 0.00 | 0.00 |
| ATOM | 876 | HG  | SER | 57 | 88.151 | 37.268 | 80.080 | 0.00 | 0.00 |
| ATOM | 877 | C   | SER | 57 | 85.639 | 38.757 | 79.128 | 0.00 | 0.00 |
| ATOM | 878 | O   | SER | 57 | 85.128 | 38.525 | 80.219 | 0.00 | 0.00 |
| ATOM | 879 | N   | LEU | 58 | 85.537 | 40.022 | 78.650 | 0.00 | 0.00 |
| ATOM | 880 | H   | LEU | 58 | 85.975 | 40.201 | 77.758 | 0.00 | 0.00 |
| ATOM | 881 | CA  | LEU | 58 | 84.799 | 41.043 | 79.334 | 0.00 | 0.00 |
| ATOM | 882 | HA  | LEU | 58 | 85.222 | 41.147 | 80.334 | 0.00 | 0.00 |
| ATOM | 883 | CB  | LEU | 58 | 84.929 | 42.387 | 78.626 | 0.00 | 0.00 |

|      |     |      |     |    |        |        |        |      |      |
|------|-----|------|-----|----|--------|--------|--------|------|------|
| ATOM | 884 | HB2  | LEU | 58 | 84.453 | 42.430 | 77.646 | 0.00 | 0.00 |
| ATOM | 885 | HB3  | LEU | 58 | 84.211 | 43.029 | 79.136 | 0.00 | 0.00 |
| ATOM | 886 | CG   | LEU | 58 | 86.376 | 42.925 | 78.632 | 0.00 | 0.00 |
| ATOM | 887 | HG   | LEU | 58 | 87.114 | 42.141 | 78.459 | 0.00 | 0.00 |
| ATOM | 888 | CD1  | LEU | 58 | 86.531 | 43.913 | 77.494 | 0.00 | 0.00 |
| ATOM | 889 | 1HD1 | LEU | 58 | 87.567 | 44.251 | 77.485 | 0.00 | 0.00 |
| ATOM | 890 | 2HD1 | LEU | 58 | 86.162 | 43.581 | 76.524 | 0.00 | 0.00 |
| ATOM | 891 | 3HD1 | LEU | 58 | 85.912 | 44.759 | 77.790 | 0.00 | 0.00 |
| ATOM | 892 | CD2  | LEU | 58 | 86.695 | 43.389 | 80.101 | 0.00 | 0.00 |
| ATOM | 893 | 1HD2 | LEU | 58 | 86.758 | 42.548 | 80.791 | 0.00 | 0.00 |
| ATOM | 894 | 2HD2 | LEU | 58 | 87.690 | 43.827 | 80.029 | 0.00 | 0.00 |
| ATOM | 895 | 3HD2 | LEU | 58 | 85.876 | 44.039 | 80.410 | 0.00 | 0.00 |
| ATOM | 896 | C    | LEU | 58 | 83.225 | 40.793 | 79.324 | 0.00 | 0.00 |
| ATOM | 897 | O    | LEU | 58 | 82.626 | 41.280 | 80.227 | 0.00 | 0.00 |
| ATOM | 898 | N    | MET | 59 | 82.717 | 40.032 | 78.438 | 0.00 | 0.00 |
| ATOM | 899 | H    | MET | 59 | 83.301 | 39.667 | 77.699 | 0.00 | 0.00 |
| ATOM | 900 | CA   | MET | 59 | 81.311 | 39.551 | 78.498 | 0.00 | 0.00 |
| ATOM | 901 | HA   | MET | 59 | 80.708 | 40.459 | 78.497 | 0.00 | 0.00 |
| ATOM | 902 | CB   | MET | 59 | 81.053 | 38.761 | 77.164 | 0.00 | 0.00 |
| ATOM | 903 | HB2  | MET | 59 | 81.994 | 38.220 | 77.066 | 0.00 | 0.00 |
| ATOM | 904 | HB3  | MET | 59 | 80.191 | 38.098 | 77.240 | 0.00 | 0.00 |
| ATOM | 905 | CG   | MET | 59 | 80.864 | 39.727 | 75.944 | 0.00 | 0.00 |
| ATOM | 906 | HG2  | MET | 59 | 79.814 | 40.019 | 75.956 | 0.00 | 0.00 |
| ATOM | 907 | HG3  | MET | 59 | 81.524 | 40.594 | 75.965 | 0.00 | 0.00 |
| ATOM | 908 | SD   | MET | 59 | 81.178 | 38.894 | 74.360 | 0.00 | 0.00 |
| ATOM | 909 | CE   | MET | 59 | 80.575 | 40.385 | 73.413 | 0.00 | 0.00 |

|      |     |     |     |    |        |        |        |      |      |
|------|-----|-----|-----|----|--------|--------|--------|------|------|
| ATOM | 910 | HE1 | MET | 59 | 79.494 | 40.302 | 73.299 | 0.00 | 0.00 |
| ATOM | 911 | HE2 | MET | 59 | 80.940 | 41.343 | 73.783 | 0.00 | 0.00 |
| ATOM | 912 | HE3 | MET | 59 | 81.091 | 40.480 | 72.458 | 0.00 | 0.00 |
| ATOM | 913 | C   | MET | 59 | 81.117 | 38.737 | 79.785 | 0.00 | 0.00 |
| ATOM | 914 | O   | MET | 59 | 80.045 | 38.688 | 80.348 | 0.00 | 0.00 |
| ATOM | 915 | N   | GLU | 60 | 82.141 | 38.066 | 80.358 | 0.00 | 0.00 |
| ATOM | 916 | H   | GLU | 60 | 83.058 | 38.064 | 79.933 | 0.00 | 0.00 |
| ATOM | 917 | CA  | GLU | 60 | 82.175 | 37.543 | 81.655 | 0.00 | 0.00 |
| ATOM | 918 | HA  | GLU | 60 | 81.173 | 37.231 | 81.947 | 0.00 | 0.00 |
| ATOM | 919 | CB  | GLU | 60 | 83.019 | 36.332 | 81.869 | 0.00 | 0.00 |
| ATOM | 920 | HB2 | GLU | 60 | 84.085 | 36.507 | 81.721 | 0.00 | 0.00 |
| ATOM | 921 | HB3 | GLU | 60 | 82.837 | 36.060 | 82.909 | 0.00 | 0.00 |
| ATOM | 922 | CG  | GLU | 60 | 82.612 | 35.113 | 80.944 | 0.00 | 0.00 |
| ATOM | 923 | HG2 | GLU | 60 | 81.537 | 34.946 | 81.023 | 0.00 | 0.00 |
| ATOM | 924 | HG3 | GLU | 60 | 82.797 | 35.243 | 79.877 | 0.00 | 0.00 |
| ATOM | 925 | CD  | GLU | 60 | 83.389 | 33.829 | 81.340 | 0.00 | 0.00 |
| ATOM | 926 | OE1 | GLU | 60 | 83.432 | 33.427 | 82.529 | 0.00 | 0.00 |
| ATOM | 927 | OE2 | GLU | 60 | 84.051 | 33.130 | 80.501 | 0.00 | 0.00 |
| ATOM | 928 | C   | GLU | 60 | 82.450 | 38.532 | 82.809 | 0.00 | 0.00 |
| ATOM | 929 | O   | GLU | 60 | 81.632 | 38.762 | 83.708 | 0.00 | 0.00 |
| ATOM | 930 | N   | GLU | 61 | 83.576 | 39.203 | 82.794 | 0.00 | 0.00 |
| ATOM | 931 | H   | GLU | 61 | 84.139 | 39.104 | 81.962 | 0.00 | 0.00 |
| ATOM | 932 | CA  | GLU | 61 | 84.230 | 39.860 | 83.865 | 0.00 | 0.00 |
| ATOM | 933 | HA  | GLU | 61 | 84.381 | 39.063 | 84.593 | 0.00 | 0.00 |
| ATOM | 934 | CB  | GLU | 61 | 85.554 | 40.361 | 83.470 | 0.00 | 0.00 |
| ATOM | 935 | HB2 | GLU | 61 | 85.412 | 41.024 | 82.617 | 0.00 | 0.00 |

|      |     |     |     |    |        |        |        |      |      |
|------|-----|-----|-----|----|--------|--------|--------|------|------|
| ATOM | 936 | HB3 | GLU | 61 | 85.965 | 41.165 | 84.080 | 0.00 | 0.00 |
| ATOM | 937 | CG  | GLU | 61 | 86.627 | 39.326 | 83.070 | 0.00 | 0.00 |
| ATOM | 938 | HG2 | GLU | 61 | 86.256 | 38.711 | 82.250 | 0.00 | 0.00 |
| ATOM | 939 | HG3 | GLU | 61 | 87.494 | 39.930 | 82.802 | 0.00 | 0.00 |
| ATOM | 940 | CD  | GLU | 61 | 87.141 | 38.530 | 84.240 | 0.00 | 0.00 |
| ATOM | 941 | OE1 | GLU | 61 | 87.490 | 37.310 | 84.134 | 0.00 | 0.00 |
| ATOM | 942 | OE2 | GLU | 61 | 87.372 | 39.083 | 85.324 | 0.00 | 0.00 |
| ATOM | 943 | C   | GLU | 61 | 83.463 | 41.013 | 84.477 | 0.00 | 0.00 |
| ATOM | 944 | O   | GLU | 61 | 83.767 | 41.381 | 85.600 | 0.00 | 0.00 |
| ATOM | 945 | N   | GLY | 62 | 82.396 | 41.526 | 83.792 | 0.00 | 0.00 |
| ATOM | 946 | H   | GLY | 62 | 82.289 | 41.174 | 82.851 | 0.00 | 0.00 |
| ATOM | 947 | CA  | GLY | 62 | 81.548 | 42.495 | 84.414 | 0.00 | 0.00 |
| ATOM | 948 | HA2 | GLY | 62 | 82.128 | 43.266 | 84.922 | 0.00 | 0.00 |
| ATOM | 949 | HA3 | GLY | 62 | 80.990 | 43.079 | 83.682 | 0.00 | 0.00 |
| ATOM | 950 | C   | GLY | 62 | 80.629 | 41.989 | 85.478 | 0.00 | 0.00 |
| ATOM | 951 | O   | GLY | 62 | 79.902 | 42.859 | 86.003 | 0.00 | 0.00 |
| ATOM | 952 | N   | ARG | 63 | 80.533 | 40.704 | 85.680 | 0.00 | 0.00 |
| ATOM | 953 | H   | ARG | 63 | 80.938 | 40.082 | 84.994 | 0.00 | 0.00 |
| ATOM | 954 | CA  | ARG | 63 | 79.780 | 39.980 | 86.707 | 0.00 | 0.00 |
| ATOM | 955 | HA  | ARG | 63 | 78.867 | 40.534 | 86.922 | 0.00 | 0.00 |
| ATOM | 956 | CB  | ARG | 63 | 79.299 | 38.628 | 86.075 | 0.00 | 0.00 |
| ATOM | 957 | HB2 | ARG | 63 | 78.928 | 38.798 | 85.065 | 0.00 | 0.00 |
| ATOM | 958 | HB3 | ARG | 63 | 80.195 | 38.009 | 86.033 | 0.00 | 0.00 |
| ATOM | 959 | CG  | ARG | 63 | 78.199 | 37.926 | 86.849 | 0.00 | 0.00 |
| ATOM | 960 | HG2 | ARG | 63 | 78.684 | 37.335 | 87.626 | 0.00 | 0.00 |
| ATOM | 961 | HG3 | ARG | 63 | 77.589 | 38.648 | 87.391 | 0.00 | 0.00 |



|      |     |      |     |    |        |        |        |      |      |
|------|-----|------|-----|----|--------|--------|--------|------|------|
| ATOM | 962 | CD   | ARG | 63 | 77.300 | 37.052 | 86.049 | 0.00 | 0.00 |
| ATOM | 963 | HD2  | ARG | 63 | 76.633 | 36.508 | 86.718 | 0.00 | 0.00 |
| ATOM | 964 | HD3  | ARG | 63 | 76.708 | 37.622 | 85.334 | 0.00 | 0.00 |
| ATOM | 965 | NE   | ARG | 63 | 77.993 | 35.992 | 85.270 | 0.00 | 0.00 |
| ATOM | 966 | HE   | ARG | 63 | 78.624 | 35.419 | 85.813 | 0.00 | 0.00 |
| ATOM | 967 | CZ   | ARG | 63 | 78.100 | 35.877 | 83.933 | 0.00 | 0.00 |
| ATOM | 968 | NH1  | ARG | 63 | 77.408 | 36.578 | 83.046 | 0.00 | 0.00 |
| ATOM | 969 | 1HH1 | ARG | 63 | 77.395 | 36.529 | 82.037 | 0.00 | 0.00 |
| ATOM | 970 | 2HH1 | ARG | 63 | 76.734 | 37.252 | 83.381 | 0.00 | 0.00 |
| ATOM | 971 | NH2  | ARG | 63 | 78.966 | 35.051 | 83.440 | 0.00 | 0.00 |
| ATOM | 972 | 1HH2 | ARG | 63 | 79.026 | 34.894 | 82.444 | 0.00 | 0.00 |
| ATOM | 973 | 2HH2 | ARG | 63 | 79.642 | 34.661 | 84.080 | 0.00 | 0.00 |
| ATOM | 974 | C    | ARG | 63 | 80.525 | 39.745 | 88.051 | 0.00 | 0.00 |
| ATOM | 975 | O    | ARG | 63 | 79.918 | 39.321 | 89.055 | 0.00 | 0.00 |
| ATOM | 976 | N    | HIE | 64 | 81.834 | 40.136 | 88.197 | 0.00 | 0.00 |
| ATOM | 977 | H    | HIE | 64 | 82.263 | 40.437 | 87.334 | 0.00 | 0.00 |
| ATOM | 978 | CA   | HIE | 64 | 82.667 | 39.881 | 89.370 | 0.00 | 0.00 |
| ATOM | 979 | HA   | HIE | 64 | 82.162 | 39.246 | 90.098 | 0.00 | 0.00 |
| ATOM | 980 | CB   | HIE | 64 | 83.990 | 39.205 | 88.904 | 0.00 | 0.00 |
| ATOM | 981 | HB2  | HIE | 64 | 84.602 | 39.978 | 88.440 | 0.00 | 0.00 |
| ATOM | 982 | HB3  | HIE | 64 | 84.517 | 38.947 | 89.823 | 0.00 | 0.00 |
| ATOM | 983 | CG   | HIE | 64 | 83.845 | 38.055 | 87.904 | 0.00 | 0.00 |
| ATOM | 984 | ND1  | HIE | 64 | 82.731 | 37.187 | 87.826 | 0.00 | 0.00 |
| ATOM | 985 | CE1  | HIE | 64 | 82.999 | 36.403 | 86.797 | 0.00 | 0.00 |
| ATOM | 986 | HE1  | HIE | 64 | 82.276 | 35.696 | 86.417 | 0.00 | 0.00 |
| ATOM | 987 | NE2  | HIE | 64 | 84.258 | 36.489 | 86.367 | 0.00 | 0.00 |

|      |      |      |     |    |        |        |        |      |      |
|------|------|------|-----|----|--------|--------|--------|------|------|
| ATOM | 988  | HE2  | HIE | 64 | 84.685 | 35.835 | 85.727 | 0.00 | 0.00 |
| ATOM | 989  | CD2  | HIE | 64 | 84.761 | 37.621 | 86.982 | 0.00 | 0.00 |
| ATOM | 990  | HD2  | HIE | 64 | 85.606 | 38.276 | 86.827 | 0.00 | 0.00 |
| ATOM | 991  | C    | HIE | 64 | 82.998 | 41.191 | 90.150 | 0.00 | 0.00 |
| ATOM | 992  | O    | HIE | 64 | 84.018 | 41.219 | 90.860 | 0.00 | 0.00 |
| ATOM | 993  | N    | VAL | 65 | 82.131 | 42.199 | 90.058 | 0.00 | 0.00 |
| ATOM | 994  | H    | VAL | 65 | 81.426 | 42.123 | 89.339 | 0.00 | 0.00 |
| ATOM | 995  | CA   | VAL | 65 | 82.472 | 43.592 | 90.499 | 0.00 | 0.00 |
| ATOM | 996  | HA   | VAL | 65 | 83.480 | 43.557 | 90.913 | 0.00 | 0.00 |
| ATOM | 997  | CB   | VAL | 65 | 82.442 | 44.616 | 89.348 | 0.00 | 0.00 |
| ATOM | 998  | HB   | VAL | 65 | 81.388 | 44.677 | 89.076 | 0.00 | 0.00 |
| ATOM | 999  | CG1  | VAL | 65 | 82.830 | 46.022 | 89.775 | 0.00 | 0.00 |
| ATOM | 1000 | 1HG1 | VAL | 65 | 83.885 | 45.928 | 90.034 | 0.00 | 0.00 |
| ATOM | 1001 | 2HG1 | VAL | 65 | 82.792 | 46.656 | 88.890 | 0.00 | 0.00 |
| ATOM | 1002 | 3HG1 | VAL | 65 | 82.137 | 46.374 | 90.539 | 0.00 | 0.00 |
| ATOM | 1003 | CG2  | VAL | 65 | 83.420 | 44.062 | 88.303 | 0.00 | 0.00 |
| ATOM | 1004 | 1HG2 | VAL | 65 | 84.426 | 44.065 | 88.722 | 0.00 | 0.00 |
| ATOM | 1005 | 2HG2 | VAL | 65 | 83.082 | 43.094 | 87.933 | 0.00 | 0.00 |
| ATOM | 1006 | 3HG2 | VAL | 65 | 83.342 | 44.698 | 87.421 | 0.00 | 0.00 |
| ATOM | 1007 | C    | VAL | 65 | 81.513 | 44.135 | 91.607 | 0.00 | 0.00 |
| ATOM | 1008 | O    | VAL | 65 | 81.946 | 44.516 | 92.749 | 0.00 | 0.00 |
| ATOM | 1009 | N    | LEU | 66 | 80.196 | 43.837 | 91.536 | 0.00 | 0.00 |
| ATOM | 1010 | H    | LEU | 66 | 79.901 | 43.209 | 90.801 | 0.00 | 0.00 |
| ATOM | 1011 | CA   | LEU | 66 | 79.181 | 44.264 | 92.558 | 0.00 | 0.00 |
| ATOM | 1012 | HA   | LEU | 66 | 79.689 | 44.740 | 93.397 | 0.00 | 0.00 |
| ATOM | 1013 | CB   | LEU | 66 | 78.281 | 45.369 | 91.967 | 0.00 | 0.00 |

|      |      |      |     |    |        |        |        |      |      |
|------|------|------|-----|----|--------|--------|--------|------|------|
| ATOM | 1014 | HB2  | LEU | 66 | 77.977 | 45.037 | 90.974 | 0.00 | 0.00 |
| ATOM | 1015 | HB3  | LEU | 66 | 77.386 | 45.487 | 92.577 | 0.00 | 0.00 |
| ATOM | 1016 | CG   | LEU | 66 | 79.015 | 46.658 | 91.867 | 0.00 | 0.00 |
| ATOM | 1017 | HG   | LEU | 66 | 79.730 | 46.685 | 91.044 | 0.00 | 0.00 |
| ATOM | 1018 | CD1  | LEU | 66 | 78.133 | 47.829 | 91.584 | 0.00 | 0.00 |
| ATOM | 1019 | 1HD1 | LEU | 66 | 77.344 | 47.632 | 90.857 | 0.00 | 0.00 |
| ATOM | 1020 | 2HD1 | LEU | 66 | 77.445 | 48.070 | 92.394 | 0.00 | 0.00 |
| ATOM | 1021 | 3HD1 | LEU | 66 | 78.722 | 48.642 | 91.160 | 0.00 | 0.00 |
| ATOM | 1022 | CD2  | LEU | 66 | 79.776 | 47.161 | 93.131 | 0.00 | 0.00 |
| ATOM | 1023 | 1HD2 | LEU | 66 | 80.627 | 46.515 | 93.346 | 0.00 | 0.00 |
| ATOM | 1024 | 2HD2 | LEU | 66 | 80.066 | 48.210 | 93.076 | 0.00 | 0.00 |
| ATOM | 1025 | 3HD2 | LEU | 66 | 79.149 | 47.132 | 94.022 | 0.00 | 0.00 |
| ATOM | 1026 | C    | LEU | 66 | 78.306 | 43.083 | 93.080 | 0.00 | 0.00 |
| ATOM | 1027 | O    | LEU | 66 | 78.044 | 42.123 | 92.322 | 0.00 | 0.00 |
| ATOM | 1028 | N    | THR | 67 | 77.706 | 43.262 | 94.231 | 0.00 | 0.00 |
| ATOM | 1029 | H    | THR | 67 | 77.809 | 44.148 | 94.705 | 0.00 | 0.00 |
| ATOM | 1030 | CA   | THR | 67 | 76.702 | 42.302 | 94.820 | 0.00 | 0.00 |
| ATOM | 1031 | HA   | THR | 67 | 76.343 | 41.657 | 94.018 | 0.00 | 0.00 |
| ATOM | 1032 | CB   | THR | 67 | 77.299 | 41.408 | 95.871 | 0.00 | 0.00 |
| ATOM | 1033 | HB   | THR | 67 | 76.656 | 40.711 | 96.407 | 0.00 | 0.00 |
| ATOM | 1034 | CG2  | THR | 67 | 78.554 | 40.654 | 95.330 | 0.00 | 0.00 |
| ATOM | 1035 | 1HG2 | THR | 67 | 78.344 | 40.134 | 94.395 | 0.00 | 0.00 |
| ATOM | 1036 | 2HG2 | THR | 67 | 79.400 | 41.328 | 95.192 | 0.00 | 0.00 |
| ATOM | 1037 | 3HG2 | THR | 67 | 78.941 | 40.012 | 96.121 | 0.00 | 0.00 |
| ATOM | 1038 | OG1  | THR | 67 | 77.853 | 42.180 | 96.934 | 0.00 | 0.00 |
| ATOM | 1039 | HG1  | THR | 67 | 78.377 | 41.632 | 97.523 | 0.00 | 0.00 |

|      |      |      |     |    |        |        |        |      |      |
|------|------|------|-----|----|--------|--------|--------|------|------|
| ATOM | 1040 | C    | THR | 67 | 75.493 | 43.038 | 95.432 | 0.00 | 0.00 |
| ATOM | 1041 | O    | THR | 67 | 75.464 | 44.213 | 95.781 | 0.00 | 0.00 |
| ATOM | 1042 | N    | ARG | 68 | 74.354 | 42.279 | 95.516 | 0.00 | 0.00 |
| ATOM | 1043 | H    | ARG | 68 | 74.323 | 41.351 | 95.117 | 0.00 | 0.00 |
| ATOM | 1044 | CA   | ARG | 68 | 73.111 | 42.678 | 96.180 | 0.00 | 0.00 |
| ATOM | 1045 | HA   | ARG | 68 | 72.655 | 43.417 | 95.521 | 0.00 | 0.00 |
| ATOM | 1046 | CB   | ARG | 68 | 72.134 | 41.469 | 96.405 | 0.00 | 0.00 |
| ATOM | 1047 | HB2  | ARG | 68 | 72.638 | 40.552 | 96.712 | 0.00 | 0.00 |
| ATOM | 1048 | HB3  | ARG | 68 | 71.470 | 41.805 | 97.201 | 0.00 | 0.00 |
| ATOM | 1049 | CG   | ARG | 68 | 71.296 | 41.230 | 95.154 | 0.00 | 0.00 |
| ATOM | 1050 | HG2  | ARG | 68 | 70.551 | 42.023 | 95.221 | 0.00 | 0.00 |
| ATOM | 1051 | HG3  | ARG | 68 | 71.771 | 41.433 | 94.194 | 0.00 | 0.00 |
| ATOM | 1052 | CD   | ARG | 68 | 70.565 | 39.844 | 94.919 | 0.00 | 0.00 |
| ATOM | 1053 | HD2  | ARG | 68 | 71.293 | 39.033 | 94.948 | 0.00 | 0.00 |
| ATOM | 1054 | HD3  | ARG | 68 | 69.933 | 39.681 | 95.792 | 0.00 | 0.00 |
| ATOM | 1055 | NE   | ARG | 68 | 69.740 | 39.895 | 93.750 | 0.00 | 0.00 |
| ATOM | 1056 | HE   | ARG | 68 | 68.797 | 40.223 | 93.899 | 0.00 | 0.00 |
| ATOM | 1057 | CZ   | ARG | 68 | 70.021 | 39.279 | 92.511 | 0.00 | 0.00 |
| ATOM | 1058 | NH1  | ARG | 68 | 71.241 | 38.861 | 92.199 | 0.00 | 0.00 |
| ATOM | 1059 | 1HH1 | ARG | 68 | 71.501 | 38.483 | 91.299 | 0.00 | 0.00 |
| ATOM | 1060 | 2HH1 | ARG | 68 | 71.973 | 38.849 | 92.896 | 0.00 | 0.00 |
| ATOM | 1061 | NH2  | ARG | 68 | 69.133 | 39.220 | 91.559 | 0.00 | 0.00 |
| ATOM | 1062 | 1HH2 | ARG | 68 | 69.245 | 38.762 | 90.666 | 0.00 | 0.00 |
| ATOM | 1063 | 2HH2 | ARG | 68 | 68.154 | 39.312 | 91.787 | 0.00 | 0.00 |
| ATOM | 1064 | C    | ARG | 68 | 73.226 | 43.491 | 97.497 | 0.00 | 0.00 |
| ATOM | 1065 | O    | ARG | 68 | 72.269 | 44.217 | 97.853 | 0.00 | 0.00 |

|      |      |     |     |    |        |        |         |      |      |
|------|------|-----|-----|----|--------|--------|---------|------|------|
| ATOM | 1066 | N   | GLU | 69 | 74.204 | 43.138 | 98.311  | 0.00 | 0.00 |
| ATOM | 1067 | H   | GLU | 69 | 74.764 | 42.338 | 98.051  | 0.00 | 0.00 |
| ATOM | 1068 | CA  | GLU | 69 | 74.469 | 43.773 | 99.630  | 0.00 | 0.00 |
| ATOM | 1069 | HA  | GLU | 69 | 73.528 | 43.968 | 100.146 | 0.00 | 0.00 |
| ATOM | 1070 | CB  | GLU | 69 | 75.348 | 42.871 | 100.459 | 0.00 | 0.00 |
| ATOM | 1071 | HB2 | GLU | 69 | 76.113 | 42.616 | 99.726  | 0.00 | 0.00 |
| ATOM | 1072 | HB3 | GLU | 69 | 75.779 | 43.437 | 101.285 | 0.00 | 0.00 |
| ATOM | 1073 | CG  | GLU | 69 | 74.598 | 41.709 | 101.106 | 0.00 | 0.00 |
| ATOM | 1074 | HG2 | GLU | 69 | 73.779 | 41.455 | 100.433 | 0.00 | 0.00 |
| ATOM | 1075 | HG3 | GLU | 69 | 75.199 | 40.801 | 101.137 | 0.00 | 0.00 |
| ATOM | 1076 | CD  | GLU | 69 | 74.064 | 41.959 | 102.514 | 0.00 | 0.00 |
| ATOM | 1077 | OE1 | GLU | 69 | 73.062 | 42.734 | 102.638 | 0.00 | 0.00 |
| ATOM | 1078 | OE2 | GLU | 69 | 74.651 | 41.330 | 103.427 | 0.00 | 0.00 |
| ATOM | 1079 | C   | GLU | 69 | 75.199 | 45.134 | 99.495  | 0.00 | 0.00 |
| ATOM | 1080 | O   | GLU | 69 | 75.393 | 45.843 | 100.471 | 0.00 | 0.00 |
| ATOM | 1081 | N   | GLN | 70 | 75.539 | 45.524 | 98.239  | 0.00 | 0.00 |
| ATOM | 1082 | H   | GLN | 70 | 75.501 | 44.784 | 97.553  | 0.00 | 0.00 |
| ATOM | 1083 | CA  | GLN | 70 | 76.165 | 46.773 | 97.835  | 0.00 | 0.00 |
| ATOM | 1084 | HA  | GLN | 70 | 76.441 | 47.308 | 98.743  | 0.00 | 0.00 |
| ATOM | 1085 | CB  | GLN | 70 | 77.456 | 46.543 | 97.022  | 0.00 | 0.00 |
| ATOM | 1086 | HB2 | GLN | 70 | 77.218 | 46.022 | 96.095  | 0.00 | 0.00 |
| ATOM | 1087 | HB3 | GLN | 70 | 78.050 | 47.445 | 96.877  | 0.00 | 0.00 |
| ATOM | 1088 | CG  | GLN | 70 | 78.507 | 45.612 | 97.753  | 0.00 | 0.00 |
| ATOM | 1089 | HG2 | GLN | 70 | 78.730 | 46.100 | 98.702  | 0.00 | 0.00 |
| ATOM | 1090 | HG3 | GLN | 70 | 77.998 | 44.667 | 97.942  | 0.00 | 0.00 |
| ATOM | 1091 | CD  | GLN | 70 | 79.798 | 45.320 | 96.987  | 0.00 | 0.00 |

|      |      |      |     |    |        |        |        |      |      |
|------|------|------|-----|----|--------|--------|--------|------|------|
| ATOM | 1092 | OE1  | GLN | 70 | 80.709 | 46.113 | 96.932 | 0.00 | 0.00 |
| ATOM | 1093 | NE2  | GLN | 70 | 79.860 | 44.210 | 96.269 | 0.00 | 0.00 |
| ATOM | 1094 | 1HE2 | GLN | 70 | 80.756 | 43.907 | 95.917 | 0.00 | 0.00 |
| ATOM | 1095 | 2HE2 | GLN | 70 | 79.118 | 43.535 | 96.153 | 0.00 | 0.00 |
| ATOM | 1096 | C    | GLN | 70 | 75.256 | 47.726 | 97.056 | 0.00 | 0.00 |
| ATOM | 1097 | O    | GLN | 70 | 75.624 | 48.911 | 96.843 | 0.00 | 0.00 |
| ATOM | 1098 | N    | VAL | 71 | 74.048 | 47.322 | 96.587 | 0.00 | 0.00 |
| ATOM | 1099 | H    | VAL | 71 | 73.696 | 46.394 | 96.772 | 0.00 | 0.00 |
| ATOM | 1100 | CA   | VAL | 71 | 73.048 | 48.059 | 95.809 | 0.00 | 0.00 |
| ATOM | 1101 | HA   | VAL | 71 | 73.282 | 49.116 | 95.685 | 0.00 | 0.00 |
| ATOM | 1102 | CB   | VAL | 71 | 72.897 | 47.404 | 94.367 | 0.00 | 0.00 |
| ATOM | 1103 | HB   | VAL | 71 | 72.141 | 47.892 | 93.752 | 0.00 | 0.00 |
| ATOM | 1104 | CG1  | VAL | 71 | 74.186 | 47.406 | 93.525 | 0.00 | 0.00 |
| ATOM | 1105 | 1HG1 | VAL | 71 | 74.855 | 46.600 | 93.827 | 0.00 | 0.00 |
| ATOM | 1106 | 2HG1 | VAL | 71 | 73.912 | 47.370 | 92.471 | 0.00 | 0.00 |
| ATOM | 1107 | 3HG1 | VAL | 71 | 74.738 | 48.320 | 93.743 | 0.00 | 0.00 |
| ATOM | 1108 | CG2  | VAL | 71 | 72.385 | 45.988 | 94.426 | 0.00 | 0.00 |
| ATOM | 1109 | 1HG2 | VAL | 71 | 71.531 | 45.838 | 95.087 | 0.00 | 0.00 |
| ATOM | 1110 | 2HG2 | VAL | 71 | 72.086 | 45.595 | 93.454 | 0.00 | 0.00 |
| ATOM | 1111 | 3HG2 | VAL | 71 | 73.183 | 45.423 | 94.908 | 0.00 | 0.00 |
| ATOM | 1112 | C    | VAL | 71 | 71.699 | 48.163 | 96.557 | 0.00 | 0.00 |
| ATOM | 1113 | O    | VAL | 71 | 71.390 | 47.289 | 97.339 | 0.00 | 0.00 |
| ATOM | 1114 | N    | MET | 72 | 70.899 | 49.239 | 96.359 | 0.00 | 0.00 |
| ATOM | 1115 | H    | MET | 72 | 71.260 | 49.996 | 95.795 | 0.00 | 0.00 |
| ATOM | 1116 | CA   | MET | 72 | 69.593 | 49.503 | 96.968 | 0.00 | 0.00 |
| ATOM | 1117 | HA   | MET | 72 | 69.673 | 49.689 | 98.039 | 0.00 | 0.00 |

|      |      |     |     |    |        |        |        |      |      |
|------|------|-----|-----|----|--------|--------|--------|------|------|
| ATOM | 1118 | CB  | MET | 72 | 69.141 | 50.889 | 96.449 | 0.00 | 0.00 |
| ATOM | 1119 | HB2 | MET | 72 | 69.449 | 51.046 | 95.415 | 0.00 | 0.00 |
| ATOM | 1120 | HB3 | MET | 72 | 68.068 | 50.932 | 96.636 | 0.00 | 0.00 |
| ATOM | 1121 | CG  | MET | 72 | 69.610 | 52.083 | 97.260 | 0.00 | 0.00 |
| ATOM | 1122 | HG2 | MET | 72 | 69.287 | 51.888 | 98.282 | 0.00 | 0.00 |
| ATOM | 1123 | HG3 | MET | 72 | 70.689 | 51.942 | 97.205 | 0.00 | 0.00 |
| ATOM | 1124 | SD  | MET | 72 | 69.017 | 53.645 | 96.550 | 0.00 | 0.00 |
| ATOM | 1125 | CE  | MET | 72 | 67.359 | 53.572 | 97.208 | 0.00 | 0.00 |
| ATOM | 1126 | HE1 | MET | 72 | 67.469 | 53.676 | 98.288 | 0.00 | 0.00 |
| ATOM | 1127 | HE2 | MET | 72 | 66.803 | 54.413 | 96.795 | 0.00 | 0.00 |
| ATOM | 1128 | HE3 | MET | 72 | 66.770 | 52.674 | 97.023 | 0.00 | 0.00 |
| ATOM | 1129 | C   | MET | 72 | 68.512 | 48.496 | 96.601 | 0.00 | 0.00 |
| ATOM | 1130 | O   | MET | 72 | 68.615 | 47.690 | 95.677 | 0.00 | 0.00 |
| ATOM | 1131 | N   | GLU | 73 | 67.297 | 48.561 | 97.193 | 0.00 | 0.00 |
| ATOM | 1132 | H   | GLU | 73 | 67.189 | 49.318 | 97.854 | 0.00 | 0.00 |
| ATOM | 1133 | CA  | GLU | 73 | 66.259 | 47.535 | 96.936 | 0.00 | 0.00 |
| ATOM | 1134 | HA  | GLU | 73 | 66.576 | 46.494 | 96.994 | 0.00 | 0.00 |
| ATOM | 1135 | CB  | GLU | 73 | 65.235 | 47.647 | 98.059 | 0.00 | 0.00 |
| ATOM | 1136 | HB2 | GLU | 73 | 65.785 | 47.461 | 98.982 | 0.00 | 0.00 |
| ATOM | 1137 | HB3 | GLU | 73 | 64.969 | 48.698 | 98.174 | 0.00 | 0.00 |
| ATOM | 1138 | CG  | GLU | 73 | 63.927 | 46.779 | 98.051 | 0.00 | 0.00 |
| ATOM | 1139 | HG2 | GLU | 73 | 63.282 | 47.010 | 98.899 | 0.00 | 0.00 |
| ATOM | 1140 | HG3 | GLU | 73 | 63.377 | 46.930 | 97.122 | 0.00 | 0.00 |
| ATOM | 1141 | CD  | GLU | 73 | 64.339 | 45.347 | 98.062 | 0.00 | 0.00 |
| ATOM | 1142 | OE1 | GLU | 73 | 64.794 | 44.859 | 96.995 | 0.00 | 0.00 |
| ATOM | 1143 | OE2 | GLU | 73 | 64.115 | 44.612 | 99.100 | 0.00 | 0.00 |

|      |      |      |     |    |        |        |        |      |      |
|------|------|------|-----|----|--------|--------|--------|------|------|
| ATOM | 1144 | C    | GLU | 73 | 65.700 | 47.696 | 95.469 | 0.00 | 0.00 |
| ATOM | 1145 | O    | GLU | 73 | 65.638 | 48.867 | 95.018 | 0.00 | 0.00 |
| ATOM | 1146 | N    | GLY | 74 | 65.269 | 46.660 | 94.770 | 0.00 | 0.00 |
| ATOM | 1147 | H    | GLY | 74 | 65.127 | 45.758 | 95.200 | 0.00 | 0.00 |
| ATOM | 1148 | CA   | GLY | 74 | 64.755 | 46.729 | 93.313 | 0.00 | 0.00 |
| ATOM | 1149 | HA2  | GLY | 74 | 64.091 | 45.903 | 93.059 | 0.00 | 0.00 |
| ATOM | 1150 | HA3  | GLY | 74 | 64.183 | 47.654 | 93.234 | 0.00 | 0.00 |
| ATOM | 1151 | C    | GLY | 74 | 65.843 | 46.698 | 92.314 | 0.00 | 0.00 |
| ATOM | 1152 | O    | GLY | 74 | 65.718 | 46.075 | 91.271 | 0.00 | 0.00 |
| ATOM | 1153 | N    | VAL | 75 | 67.077 | 47.321 | 92.598 | 0.00 | 0.00 |
| ATOM | 1154 | H    | VAL | 75 | 67.095 | 47.765 | 93.505 | 0.00 | 0.00 |
| ATOM | 1155 | CA   | VAL | 75 | 68.061 | 47.554 | 91.597 | 0.00 | 0.00 |
| ATOM | 1156 | HA   | VAL | 75 | 67.653 | 48.244 | 90.859 | 0.00 | 0.00 |
| ATOM | 1157 | CB   | VAL | 75 | 69.246 | 48.360 | 92.221 | 0.00 | 0.00 |
| ATOM | 1158 | HB   | VAL | 75 | 69.628 | 47.907 | 93.136 | 0.00 | 0.00 |
| ATOM | 1159 | CG1  | VAL | 75 | 70.266 | 48.770 | 91.262 | 0.00 | 0.00 |
| ATOM | 1160 | 1HG1 | VAL | 75 | 71.067 | 49.307 | 91.769 | 0.00 | 0.00 |
| ATOM | 1161 | 2HG1 | VAL | 75 | 70.714 | 47.871 | 90.839 | 0.00 | 0.00 |
| ATOM | 1162 | 3HG1 | VAL | 75 | 69.780 | 49.252 | 90.414 | 0.00 | 0.00 |
| ATOM | 1163 | CG2  | VAL | 75 | 68.817 | 49.677 | 92.857 | 0.00 | 0.00 |
| ATOM | 1164 | 1HG2 | VAL | 75 | 68.492 | 50.376 | 92.086 | 0.00 | 0.00 |
| ATOM | 1165 | 2HG2 | VAL | 75 | 67.969 | 49.453 | 93.504 | 0.00 | 0.00 |
| ATOM | 1166 | 3HG2 | VAL | 75 | 69.569 | 50.125 | 93.506 | 0.00 | 0.00 |
| ATOM | 1167 | C    | VAL | 75 | 68.552 | 46.333 | 90.840 | 0.00 | 0.00 |
| ATOM | 1168 | O    | VAL | 75 | 68.385 | 46.326 | 89.632 | 0.00 | 0.00 |
| ATOM | 1169 | N    | PRO | 76 | 69.066 | 45.236 | 91.369 | 0.00 | 0.00 |



|      |      |     |     |    |        |        |        |      |      |
|------|------|-----|-----|----|--------|--------|--------|------|------|
| ATOM | 1170 | CD  | PRO | 76 | 69.118 | 44.907 | 92.779 | 0.00 | 0.00 |
| ATOM | 1171 | HD2 | PRO | 76 | 69.818 | 45.650 | 93.161 | 0.00 | 0.00 |
| ATOM | 1172 | HD3 | PRO | 76 | 68.139 | 45.007 | 93.249 | 0.00 | 0.00 |
| ATOM | 1173 | CG  | PRO | 76 | 69.555 | 43.515 | 92.791 | 0.00 | 0.00 |
| ATOM | 1174 | HG2 | PRO | 76 | 70.182 | 43.315 | 93.660 | 0.00 | 0.00 |
| ATOM | 1175 | HG3 | PRO | 76 | 68.619 | 42.974 | 92.932 | 0.00 | 0.00 |
| ATOM | 1176 | CB  | PRO | 76 | 70.267 | 43.197 | 91.493 | 0.00 | 0.00 |
| ATOM | 1177 | HB2 | PRO | 76 | 71.283 | 43.510 | 91.735 | 0.00 | 0.00 |
| ATOM | 1178 | HB3 | PRO | 76 | 70.186 | 42.125 | 91.317 | 0.00 | 0.00 |
| ATOM | 1179 | CA  | PRO | 76 | 69.532 | 44.164 | 90.528 | 0.00 | 0.00 |
| ATOM | 1180 | HA  | PRO | 76 | 70.310 | 44.535 | 89.861 | 0.00 | 0.00 |
| ATOM | 1181 | C   | PRO | 76 | 68.390 | 43.359 | 89.821 | 0.00 | 0.00 |
| ATOM | 1182 | O   | PRO | 76 | 68.606 | 42.642 | 88.876 | 0.00 | 0.00 |
| ATOM | 1183 | N   | GLU | 77 | 67.139 | 43.491 | 90.305 | 0.00 | 0.00 |
| ATOM | 1184 | H   | GLU | 77 | 66.927 | 44.062 | 91.111 | 0.00 | 0.00 |
| ATOM | 1185 | CA  | GLU | 77 | 65.998 | 42.939 | 89.642 | 0.00 | 0.00 |
| ATOM | 1186 | HA  | GLU | 77 | 66.417 | 41.979 | 89.339 | 0.00 | 0.00 |
| ATOM | 1187 | CB  | GLU | 77 | 64.764 | 42.790 | 90.548 | 0.00 | 0.00 |
| ATOM | 1188 | HB2 | GLU | 77 | 64.389 | 43.778 | 90.815 | 0.00 | 0.00 |
| ATOM | 1189 | HB3 | GLU | 77 | 63.985 | 42.199 | 90.067 | 0.00 | 0.00 |
| ATOM | 1190 | CG  | GLU | 77 | 65.131 | 41.971 | 91.811 | 0.00 | 0.00 |
| ATOM | 1191 | HG2 | GLU | 77 | 65.762 | 42.574 | 92.463 | 0.00 | 0.00 |
| ATOM | 1192 | HG3 | GLU | 77 | 64.188 | 41.852 | 92.345 | 0.00 | 0.00 |
| ATOM | 1193 | CD  | GLU | 77 | 65.543 | 40.556 | 91.580 | 0.00 | 0.00 |
| ATOM | 1194 | OE1 | GLU | 77 | 65.000 | 39.851 | 90.703 | 0.00 | 0.00 |
| ATOM | 1195 | OE2 | GLU | 77 | 66.518 | 40.176 | 92.230 | 0.00 | 0.00 |

ATOM 1196 C GLU 77 65.754 43.743 88.391 0.00 0.00  
ATOM 1197 O GLU 77 65.604 43.175 87.287 0.00 0.00  
ATOM 1198 N MET 78 65.950 45.081 88.398 0.00 0.00  
ATOM 1199 H MET 78 66.073 45.462 89.326 0.00 0.00  
ATOM 1200 CA MET 78 66.048 45.934 87.170 0.00 0.00  
ATOM 1201 HA MET 78 65.245 45.575 86.527 0.00 0.00  
ATOM 1202 CB MET 78 65.868 47.383 87.509 0.00 0.00  
ATOM 1203 HB2 MET 78 66.713 47.637 88.150 0.00 0.00  
ATOM 1204 HB3 MET 78 65.869 47.967 86.589 0.00 0.00  
ATOM 1205 CG MET 78 64.629 47.687 88.291 0.00 0.00  
ATOM 1206 HG2 MET 78 63.823 47.229 87.717 0.00 0.00  
ATOM 1207 HG3 MET 78 64.738 47.137 89.225 0.00 0.00  
ATOM 1208 SD MET 78 64.128 49.392 88.691 0.00 0.00  
ATOM 1209 CE MET 78 65.641 49.949 89.511 0.00 0.00  
ATOM 1210 HE1 MET 78 65.584 51.034 89.606 0.00 0.00  
ATOM 1211 HE2 MET 78 65.717 49.396 90.448 0.00 0.00  
ATOM 1212 HE3 MET 78 66.517 49.715 88.906 0.00 0.00  
ATOM 1213 C MET 78 67.286 45.803 86.320 0.00 0.00  
ATOM 1214 O MET 78 67.393 46.577 85.299 0.00 0.00  
ATOM 1215 N ILE 79 68.240 44.898 86.585 0.00 0.00  
ATOM 1216 H ILE 79 68.035 44.290 87.365 0.00 0.00  
ATOM 1217 CA ILE 79 69.511 44.792 85.848 0.00 0.00  
ATOM 1218 HA ILE 79 69.496 45.489 85.010 0.00 0.00  
ATOM 1219 CB ILE 79 70.774 45.296 86.614 0.00 0.00  
ATOM 1220 HB ILE 79 70.904 44.680 87.503 0.00 0.00  
ATOM 1221 CG2 ILE 79 72.140 45.268 85.863 0.00 0.00

|      |      |      |     |    |        |        |        |      |      |
|------|------|------|-----|----|--------|--------|--------|------|------|
| ATOM | 1222 | 1HG2 | ILE | 79 | 72.084 | 44.483 | 85.110 | 0.00 | 0.00 |
| ATOM | 1223 | 2HG2 | ILE | 79 | 72.314 | 46.176 | 85.285 | 0.00 | 0.00 |
| ATOM | 1224 | 3HG2 | ILE | 79 | 72.893 | 45.016 | 86.609 | 0.00 | 0.00 |
| ATOM | 1225 | CG1  | ILE | 79 | 70.578 | 46.787 | 87.089 | 0.00 | 0.00 |
| ATOM | 1226 | 2HG1 | ILE | 79 | 70.766 | 47.405 | 86.211 | 0.00 | 0.00 |
| ATOM | 1227 | 3HG1 | ILE | 79 | 69.530 | 47.034 | 87.260 | 0.00 | 0.00 |
| ATOM | 1228 | CD1  | ILE | 79 | 71.533 | 47.037 | 88.278 | 0.00 | 0.00 |
| ATOM | 1229 | 1HD1 | ILE | 79 | 71.680 | 48.086 | 88.532 | 0.00 | 0.00 |
| ATOM | 1230 | 2HD1 | ILE | 79 | 71.196 | 46.419 | 89.110 | 0.00 | 0.00 |
| ATOM | 1231 | 3HD1 | ILE | 79 | 72.540 | 46.688 | 88.050 | 0.00 | 0.00 |
| ATOM | 1232 | C    | ILE | 79 | 69.632 | 43.438 | 85.123 | 0.00 | 0.00 |
| ATOM | 1233 | O    | ILE | 79 | 70.483 | 42.641 | 85.566 | 0.00 | 0.00 |
| ATOM | 1234 | N    | PRO | 80 | 68.813 | 43.014 | 84.081 | 0.00 | 0.00 |
| ATOM | 1235 | CD   | PRO | 80 | 67.683 | 43.764 | 83.489 | 0.00 | 0.00 |
| ATOM | 1236 | HD2  | PRO | 80 | 66.850 | 43.955 | 84.166 | 0.00 | 0.00 |
| ATOM | 1237 | HD3  | PRO | 80 | 68.049 | 44.741 | 83.176 | 0.00 | 0.00 |
| ATOM | 1238 | CG   | PRO | 80 | 67.217 | 42.944 | 82.287 | 0.00 | 0.00 |
| ATOM | 1239 | HG2  | PRO | 80 | 66.143 | 43.097 | 82.177 | 0.00 | 0.00 |
| ATOM | 1240 | HG3  | PRO | 80 | 67.773 | 43.246 | 81.400 | 0.00 | 0.00 |
| ATOM | 1241 | CB   | PRO | 80 | 67.684 | 41.521 | 82.579 | 0.00 | 0.00 |
| ATOM | 1242 | HB2  | PRO | 80 | 67.014 | 41.002 | 83.264 | 0.00 | 0.00 |
| ATOM | 1243 | HB3  | PRO | 80 | 67.856 | 40.954 | 81.664 | 0.00 | 0.00 |
| ATOM | 1244 | CA   | PRO | 80 | 69.025 | 41.727 | 83.306 | 0.00 | 0.00 |
| ATOM | 1245 | HA   | PRO | 80 | 69.323 | 40.972 | 84.034 | 0.00 | 0.00 |
| ATOM | 1246 | C    | PRO | 80 | 70.282 | 41.887 | 82.402 | 0.00 | 0.00 |
| ATOM | 1247 | O    | PRO | 80 | 71.017 | 40.941 | 82.276 | 0.00 | 0.00 |

|      |      |      |     |    |        |        |        |      |      |
|------|------|------|-----|----|--------|--------|--------|------|------|
| ATOM | 1248 | N    | ASP | 81 | 70.597 | 43.011 | 81.717 | 0.00 | 0.00 |
| ATOM | 1249 | H    | ASP | 81 | 69.986 | 43.814 | 81.672 | 0.00 | 0.00 |
| ATOM | 1250 | CA   | ASP | 81 | 71.833 | 43.142 | 80.843 | 0.00 | 0.00 |
| ATOM | 1251 | HA   | ASP | 81 | 72.498 | 42.324 | 81.122 | 0.00 | 0.00 |
| ATOM | 1252 | CB   | ASP | 81 | 71.448 | 42.912 | 79.371 | 0.00 | 0.00 |
| ATOM | 1253 | HB2  | ASP | 81 | 72.412 | 42.944 | 78.865 | 0.00 | 0.00 |
| ATOM | 1254 | HB3  | ASP | 81 | 71.040 | 41.937 | 79.104 | 0.00 | 0.00 |
| ATOM | 1255 | CG   | ASP | 81 | 70.515 | 43.938 | 78.655 | 0.00 | 0.00 |
| ATOM | 1256 | OD1  | ASP | 81 | 69.536 | 44.464 | 79.264 | 0.00 | 0.00 |
| ATOM | 1257 | OD2  | ASP | 81 | 70.814 | 44.280 | 77.520 | 0.00 | 0.00 |
| ATOM | 1258 | C    | ASP | 81 | 72.506 | 44.585 | 80.979 | 0.00 | 0.00 |
| ATOM | 1259 | O    | ASP | 81 | 71.830 | 45.536 | 81.335 | 0.00 | 0.00 |
| ATOM | 1260 | N    | ILE | 82 | 73.800 | 44.694 | 80.606 | 0.00 | 0.00 |
| ATOM | 1261 | H    | ILE | 82 | 74.235 | 43.838 | 80.291 | 0.00 | 0.00 |
| ATOM | 1262 | CA   | ILE | 82 | 74.550 | 45.953 | 80.387 | 0.00 | 0.00 |
| ATOM | 1263 | HA   | ILE | 82 | 73.822 | 46.721 | 80.127 | 0.00 | 0.00 |
| ATOM | 1264 | CB   | ILE | 82 | 75.465 | 46.383 | 81.669 | 0.00 | 0.00 |
| ATOM | 1265 | HB   | ILE | 82 | 75.953 | 47.332 | 81.446 | 0.00 | 0.00 |
| ATOM | 1266 | CG2  | ILE | 82 | 74.479 | 46.619 | 82.886 | 0.00 | 0.00 |
| ATOM | 1267 | 1HG2 | ILE | 82 | 75.063 | 46.924 | 83.754 | 0.00 | 0.00 |
| ATOM | 1268 | 2HG2 | ILE | 82 | 73.748 | 47.377 | 82.604 | 0.00 | 0.00 |
| ATOM | 1269 | 3HG2 | ILE | 82 | 73.847 | 45.766 | 83.134 | 0.00 | 0.00 |
| ATOM | 1270 | CG1  | ILE | 82 | 76.661 | 45.384 | 81.822 | 0.00 | 0.00 |
| ATOM | 1271 | 2HG1 | ILE | 82 | 76.196 | 44.408 | 81.961 | 0.00 | 0.00 |
| ATOM | 1272 | 3HG1 | ILE | 82 | 77.276 | 45.358 | 80.923 | 0.00 | 0.00 |
| ATOM | 1273 | CD1  | ILE | 82 | 77.682 | 45.682 | 82.927 | 0.00 | 0.00 |

|      |      |      |     |    |        |        |        |      |      |
|------|------|------|-----|----|--------|--------|--------|------|------|
| ATOM | 1274 | 1HD1 | ILE | 82 | 78.294 | 44.810 | 83.155 | 0.00 | 0.00 |
| ATOM | 1275 | 2HD1 | ILE | 82 | 78.287 | 46.566 | 82.726 | 0.00 | 0.00 |
| ATOM | 1276 | 3HD1 | ILE | 82 | 77.168 | 45.913 | 83.860 | 0.00 | 0.00 |
| ATOM | 1277 | C    | ILE | 82 | 75.438 | 45.870 | 79.158 | 0.00 | 0.00 |
| ATOM | 1278 | O    | ILE | 82 | 75.930 | 44.863 | 78.762 | 0.00 | 0.00 |
| ATOM | 1279 | N    | GLN | 83 | 75.591 | 46.955 | 78.454 | 0.00 | 0.00 |
| ATOM | 1280 | H    | GLN | 83 | 75.239 | 47.811 | 78.859 | 0.00 | 0.00 |
| ATOM | 1281 | CA   | GLN | 83 | 76.294 | 46.996 | 77.170 | 0.00 | 0.00 |
| ATOM | 1282 | HA   | GLN | 83 | 76.900 | 46.095 | 77.075 | 0.00 | 0.00 |
| ATOM | 1283 | CB   | GLN | 83 | 75.221 | 46.963 | 76.064 | 0.00 | 0.00 |
| ATOM | 1284 | HB2  | GLN | 83 | 74.560 | 47.830 | 76.056 | 0.00 | 0.00 |
| ATOM | 1285 | HB3  | GLN | 83 | 75.831 | 46.942 | 75.162 | 0.00 | 0.00 |
| ATOM | 1286 | CG   | GLN | 83 | 74.362 | 45.721 | 76.027 | 0.00 | 0.00 |
| ATOM | 1287 | HG2  | GLN | 83 | 75.065 | 44.910 | 76.215 | 0.00 | 0.00 |
| ATOM | 1288 | HG3  | GLN | 83 | 73.610 | 45.709 | 76.816 | 0.00 | 0.00 |
| ATOM | 1289 | CD   | GLN | 83 | 73.608 | 45.408 | 74.732 | 0.00 | 0.00 |
| ATOM | 1290 | OE1  | GLN | 83 | 72.490 | 45.888 | 74.448 | 0.00 | 0.00 |
| ATOM | 1291 | NE2  | GLN | 83 | 74.095 | 44.580 | 73.829 | 0.00 | 0.00 |
| ATOM | 1292 | 1HE2 | GLN | 83 | 73.472 | 44.328 | 73.074 | 0.00 | 0.00 |
| ATOM | 1293 | 2HE2 | GLN | 83 | 74.970 | 44.086 | 73.929 | 0.00 | 0.00 |
| ATOM | 1294 | C    | GLN | 83 | 77.148 | 48.236 | 77.046 | 0.00 | 0.00 |
| ATOM | 1295 | O    | GLN | 83 | 76.815 | 49.344 | 77.459 | 0.00 | 0.00 |
| ATOM | 1296 | N    | VAL | 84 | 78.344 | 48.136 | 76.505 | 0.00 | 0.00 |
| ATOM | 1297 | H    | VAL | 84 | 78.503 | 47.295 | 75.969 | 0.00 | 0.00 |
| ATOM | 1298 | CA   | VAL | 84 | 79.239 | 49.253 | 76.100 | 0.00 | 0.00 |
| ATOM | 1299 | HA   | VAL | 84 | 78.566 | 50.109 | 76.057 | 0.00 | 0.00 |

|      |      |      |     |    |        |        |        |      |      |
|------|------|------|-----|----|--------|--------|--------|------|------|
| ATOM | 1300 | CB   | VAL | 84 | 80.282 | 49.747 | 77.038 | 0.00 | 0.00 |
| ATOM | 1301 | HB   | VAL | 84 | 80.829 | 50.583 | 76.602 | 0.00 | 0.00 |
| ATOM | 1302 | CG1  | VAL | 84 | 79.860 | 50.209 | 78.484 | 0.00 | 0.00 |
| ATOM | 1303 | 1HG1 | VAL | 84 | 80.740 | 50.514 | 79.051 | 0.00 | 0.00 |
| ATOM | 1304 | 2HG1 | VAL | 84 | 79.083 | 50.973 | 78.503 | 0.00 | 0.00 |
| ATOM | 1305 | 3HG1 | VAL | 84 | 79.577 | 49.282 | 78.982 | 0.00 | 0.00 |
| ATOM | 1306 | CG2  | VAL | 84 | 81.366 | 48.698 | 77.180 | 0.00 | 0.00 |
| ATOM | 1307 | 1HG2 | VAL | 84 | 82.341 | 49.146 | 77.372 | 0.00 | 0.00 |
| ATOM | 1308 | 2HG2 | VAL | 84 | 81.142 | 47.965 | 77.954 | 0.00 | 0.00 |
| ATOM | 1309 | 3HG2 | VAL | 84 | 81.389 | 48.117 | 76.258 | 0.00 | 0.00 |
| ATOM | 1310 | C    | VAL | 84 | 79.822 | 49.066 | 74.659 | 0.00 | 0.00 |
| ATOM | 1311 | O    | VAL | 84 | 79.935 | 47.971 | 74.253 | 0.00 | 0.00 |
| ATOM | 1312 | N    | GLU | 85 | 80.214 | 50.123 | 73.971 | 0.00 | 0.00 |
| ATOM | 1313 | H    | GLU | 85 | 80.083 | 51.053 | 74.344 | 0.00 | 0.00 |
| ATOM | 1314 | CA   | GLU | 85 | 81.308 | 50.053 | 72.961 | 0.00 | 0.00 |
| ATOM | 1315 | HA   | GLU | 85 | 81.741 | 49.058 | 72.858 | 0.00 | 0.00 |
| ATOM | 1316 | CB   | GLU | 85 | 80.830 | 50.605 | 71.574 | 0.00 | 0.00 |
| ATOM | 1317 | HB2  | GLU | 85 | 80.690 | 51.679 | 71.697 | 0.00 | 0.00 |
| ATOM | 1318 | HB3  | GLU | 85 | 81.642 | 50.492 | 70.855 | 0.00 | 0.00 |
| ATOM | 1319 | CG   | GLU | 85 | 79.589 | 49.914 | 70.972 | 0.00 | 0.00 |
| ATOM | 1320 | HG2  | GLU | 85 | 78.637 | 50.433 | 71.086 | 0.00 | 0.00 |
| ATOM | 1321 | HG3  | GLU | 85 | 79.486 | 48.955 | 71.480 | 0.00 | 0.00 |
| ATOM | 1322 | CD   | GLU | 85 | 79.731 | 49.626 | 69.484 | 0.00 | 0.00 |
| ATOM | 1323 | OE1  | GLU | 85 | 80.582 | 50.161 | 68.792 | 0.00 | 0.00 |
| ATOM | 1324 | OE2  | GLU | 85 | 78.878 | 48.914 | 68.901 | 0.00 | 0.00 |
| ATOM | 1325 | C    | GLU | 85 | 82.546 | 50.811 | 73.379 | 0.00 | 0.00 |

|      |      |      |     |    |        |        |        |      |      |
|------|------|------|-----|----|--------|--------|--------|------|------|
| ATOM | 1326 | O    | GLU | 85 | 82.511 | 51.777 | 74.119 | 0.00 | 0.00 |
| ATOM | 1327 | N    | ALA | 86 | 83.772 | 50.349 | 73.093 | 0.00 | 0.00 |
| ATOM | 1328 | H    | ALA | 86 | 83.757 | 49.459 | 72.615 | 0.00 | 0.00 |
| ATOM | 1329 | CA   | ALA | 86 | 85.109 | 50.911 | 73.438 | 0.00 | 0.00 |
| ATOM | 1330 | HA   | ALA | 86 | 85.004 | 51.986 | 73.584 | 0.00 | 0.00 |
| ATOM | 1331 | CB   | ALA | 86 | 85.543 | 50.204 | 74.687 | 0.00 | 0.00 |
| ATOM | 1332 | HB1  | ALA | 86 | 85.674 | 49.131 | 74.550 | 0.00 | 0.00 |
| ATOM | 1333 | HB2  | ALA | 86 | 86.493 | 50.666 | 74.955 | 0.00 | 0.00 |
| ATOM | 1334 | HB3  | ALA | 86 | 84.721 | 50.324 | 75.393 | 0.00 | 0.00 |
| ATOM | 1335 | C    | ALA | 86 | 86.035 | 50.758 | 72.240 | 0.00 | 0.00 |
| ATOM | 1336 | O    | ALA | 86 | 85.870 | 49.787 | 71.509 | 0.00 | 0.00 |
| ATOM | 1337 | N    | THR | 87 | 87.111 | 51.574 | 72.108 | 0.00 | 0.00 |
| ATOM | 1338 | H    | THR | 87 | 87.244 | 52.286 | 72.811 | 0.00 | 0.00 |
| ATOM | 1339 | CA   | THR | 87 | 87.920 | 51.624 | 70.929 | 0.00 | 0.00 |
| ATOM | 1340 | HA   | THR | 87 | 87.225 | 51.403 | 70.119 | 0.00 | 0.00 |
| ATOM | 1341 | CB   | THR | 87 | 88.594 | 52.952 | 70.526 | 0.00 | 0.00 |
| ATOM | 1342 | HB   | THR | 87 | 89.490 | 53.110 | 71.126 | 0.00 | 0.00 |
| ATOM | 1343 | CG2  | THR | 87 | 88.957 | 52.845 | 69.010 | 0.00 | 0.00 |
| ATOM | 1344 | 1HG2 | THR | 87 | 89.376 | 53.834 | 68.822 | 0.00 | 0.00 |
| ATOM | 1345 | 2HG2 | THR | 87 | 89.788 | 52.225 | 68.672 | 0.00 | 0.00 |
| ATOM | 1346 | 3HG2 | THR | 87 | 88.082 | 52.590 | 68.412 | 0.00 | 0.00 |
| ATOM | 1347 | OG1  | THR | 87 | 87.628 | 53.980 | 70.511 | 0.00 | 0.00 |
| ATOM | 1348 | HG1  | THR | 87 | 87.540 | 54.212 | 71.439 | 0.00 | 0.00 |
| ATOM | 1349 | C    | THR | 87 | 88.979 | 50.452 | 70.880 | 0.00 | 0.00 |
| ATOM | 1350 | O    | THR | 87 | 89.438 | 50.084 | 71.980 | 0.00 | 0.00 |
| ATOM | 1351 | N    | PHE | 88 | 89.339 | 50.000 | 69.698 | 0.00 | 0.00 |

|      |      |     |     |    |        |        |        |      |      |
|------|------|-----|-----|----|--------|--------|--------|------|------|
| ATOM | 1352 | H   | PHE | 88 | 88.761 | 50.341 | 68.943 | 0.00 | 0.00 |
| ATOM | 1353 | CA  | PHE | 88 | 90.074 | 48.775 | 69.359 | 0.00 | 0.00 |
| ATOM | 1354 | HA  | PHE | 88 | 90.614 | 48.441 | 70.245 | 0.00 | 0.00 |
| ATOM | 1355 | CB  | PHE | 88 | 88.976 | 47.762 | 69.128 | 0.00 | 0.00 |
| ATOM | 1356 | HB2 | PHE | 88 | 87.983 | 48.197 | 69.016 | 0.00 | 0.00 |
| ATOM | 1357 | HB3 | PHE | 88 | 88.985 | 47.242 | 68.171 | 0.00 | 0.00 |
| ATOM | 1358 | CG  | PHE | 88 | 88.782 | 46.637 | 70.077 | 0.00 | 0.00 |
| ATOM | 1359 | CD1 | PHE | 88 | 89.196 | 45.288 | 69.811 | 0.00 | 0.00 |
| ATOM | 1360 | HD1 | PHE | 88 | 89.623 | 45.068 | 68.843 | 0.00 | 0.00 |
| ATOM | 1361 | CE1 | PHE | 88 | 88.995 | 44.211 | 70.714 | 0.00 | 0.00 |
| ATOM | 1362 | HE1 | PHE | 88 | 89.359 | 43.203 | 70.583 | 0.00 | 0.00 |
| ATOM | 1363 | CZ  | PHE | 88 | 88.400 | 44.538 | 71.960 | 0.00 | 0.00 |
| ATOM | 1364 | HZ  | PHE | 88 | 88.285 | 43.822 | 72.761 | 0.00 | 0.00 |
| ATOM | 1365 | CE2 | PHE | 88 | 87.924 | 45.857 | 72.188 | 0.00 | 0.00 |
| ATOM | 1366 | HE2 | PHE | 88 | 87.316 | 45.938 | 73.076 | 0.00 | 0.00 |
| ATOM | 1367 | CD2 | PHE | 88 | 88.124 | 46.904 | 71.283 | 0.00 | 0.00 |
| ATOM | 1368 | HD2 | PHE | 88 | 87.692 | 47.880 | 71.444 | 0.00 | 0.00 |
| ATOM | 1369 | C   | PHE | 88 | 90.916 | 48.966 | 68.158 | 0.00 | 0.00 |
| ATOM | 1370 | O   | PHE | 88 | 90.820 | 50.018 | 67.488 | 0.00 | 0.00 |
| ATOM | 1371 | N   | PRO | 89 | 91.677 | 47.964 | 67.733 | 0.00 | 0.00 |
| ATOM | 1372 | CD  | PRO | 89 | 91.897 | 46.653 | 68.316 | 0.00 | 0.00 |
| ATOM | 1373 | HD2 | PRO | 89 | 91.180 | 45.902 | 67.986 | 0.00 | 0.00 |
| ATOM | 1374 | HD3 | PRO | 89 | 91.864 | 46.696 | 69.405 | 0.00 | 0.00 |
| ATOM | 1375 | CG  | PRO | 89 | 93.348 | 46.217 | 67.889 | 0.00 | 0.00 |
| ATOM | 1376 | HG2 | PRO | 89 | 94.064 | 46.654 | 68.585 | 0.00 | 0.00 |
| ATOM | 1377 | HG3 | PRO | 89 | 93.403 | 45.130 | 67.834 | 0.00 | 0.00 |



|      |      |     |     |    |        |        |        |      |      |
|------|------|-----|-----|----|--------|--------|--------|------|------|
| ATOM | 1378 | CB  | PRO | 89 | 93.444 | 46.813 | 66.508 | 0.00 | 0.00 |
| ATOM | 1379 | HB2 | PRO | 89 | 94.466 | 47.035 | 66.200 | 0.00 | 0.00 |
| ATOM | 1380 | HB3 | PRO | 89 | 92.949 | 46.130 | 65.817 | 0.00 | 0.00 |
| ATOM | 1381 | CA  | PRO | 89 | 92.665 | 48.150 | 66.625 | 0.00 | 0.00 |
| ATOM | 1382 | HA  | PRO | 89 | 93.368 | 48.969 | 66.776 | 0.00 | 0.00 |
| ATOM | 1383 | C   | PRO | 89 | 91.964 | 48.405 | 65.260 | 0.00 | 0.00 |
| ATOM | 1384 | O   | PRO | 89 | 92.627 | 49.008 | 64.434 | 0.00 | 0.00 |
| ATOM | 1385 | N   | ASP | 90 | 90.667 | 48.040 | 65.059 | 0.00 | 0.00 |
| ATOM | 1386 | H   | ASP | 90 | 90.223 | 47.570 | 65.835 | 0.00 | 0.00 |
| ATOM | 1387 | CA  | ASP | 90 | 89.870 | 48.184 | 63.837 | 0.00 | 0.00 |
| ATOM | 1388 | HA  | ASP | 90 | 90.558 | 48.366 | 63.011 | 0.00 | 0.00 |
| ATOM | 1389 | CB  | ASP | 90 | 89.237 | 46.836 | 63.546 | 0.00 | 0.00 |
| ATOM | 1390 | HB2 | ASP | 90 | 88.829 | 46.728 | 62.541 | 0.00 | 0.00 |
| ATOM | 1391 | HB3 | ASP | 90 | 90.046 | 46.112 | 63.637 | 0.00 | 0.00 |
| ATOM | 1392 | CG  | ASP | 90 | 88.182 | 46.388 | 64.579 | 0.00 | 0.00 |
| ATOM | 1393 | OD1 | ASP | 90 | 86.972 | 46.255 | 64.282 | 0.00 | 0.00 |
| ATOM | 1394 | OD2 | ASP | 90 | 88.660 | 46.066 | 65.712 | 0.00 | 0.00 |
| ATOM | 1395 | C   | ASP | 90 | 88.834 | 49.351 | 63.891 | 0.00 | 0.00 |
| ATOM | 1396 | O   | ASP | 90 | 88.406 | 49.718 | 62.817 | 0.00 | 0.00 |
| ATOM | 1397 | N   | GLY | 91 | 88.404 | 49.850 | 65.027 | 0.00 | 0.00 |
| ATOM | 1398 | H   | GLY | 91 | 88.765 | 49.413 | 65.864 | 0.00 | 0.00 |
| ATOM | 1399 | CA  | GLY | 91 | 87.322 | 50.812 | 65.257 | 0.00 | 0.00 |
| ATOM | 1400 | HA2 | GLY | 91 | 87.688 | 51.832 | 65.138 | 0.00 | 0.00 |
| ATOM | 1401 | HA3 | GLY | 91 | 86.544 | 50.632 | 64.515 | 0.00 | 0.00 |
| ATOM | 1402 | C   | GLY | 91 | 86.843 | 50.616 | 66.686 | 0.00 | 0.00 |
| ATOM | 1403 | O   | GLY | 91 | 87.693 | 50.423 | 67.560 | 0.00 | 0.00 |

|      |      |     |     |    |        |        |        |      |      |
|------|------|-----|-----|----|--------|--------|--------|------|------|
| ATOM | 1404 | N   | SER | 92 | 85.589 | 50.783 | 66.908 | 0.00 | 0.00 |
| ATOM | 1405 | H   | SER | 92 | 84.968 | 50.992 | 66.139 | 0.00 | 0.00 |
| ATOM | 1406 | CA  | SER | 92 | 84.874 | 50.345 | 68.095 | 0.00 | 0.00 |
| ATOM | 1407 | HA  | SER | 92 | 85.595 | 50.358 | 68.912 | 0.00 | 0.00 |
| ATOM | 1408 | CB  | SER | 92 | 83.755 | 51.242 | 68.269 | 0.00 | 0.00 |
| ATOM | 1409 | HB2 | SER | 92 | 82.974 | 51.090 | 67.524 | 0.00 | 0.00 |
| ATOM | 1410 | HB3 | SER | 92 | 83.196 | 51.132 | 69.198 | 0.00 | 0.00 |
| ATOM | 1411 | OG  | SER | 92 | 84.231 | 52.607 | 68.282 | 0.00 | 0.00 |
| ATOM | 1412 | HG  | SER | 92 | 84.349 | 52.828 | 67.355 | 0.00 | 0.00 |
| ATOM | 1413 | C   | SER | 92 | 84.354 | 48.912 | 67.972 | 0.00 | 0.00 |
| ATOM | 1414 | O   | SER | 92 | 84.020 | 48.322 | 66.878 | 0.00 | 0.00 |
| ATOM | 1415 | N   | LYS | 93 | 84.171 | 48.272 | 69.119 | 0.00 | 0.00 |
| ATOM | 1416 | H   | LYS | 93 | 84.553 | 48.825 | 69.873 | 0.00 | 0.00 |
| ATOM | 1417 | CA  | LYS | 93 | 83.573 | 46.873 | 69.370 | 0.00 | 0.00 |
| ATOM | 1418 | HA  | LYS | 93 | 83.076 | 46.527 | 68.463 | 0.00 | 0.00 |
| ATOM | 1419 | CB  | LYS | 93 | 84.686 | 45.873 | 69.656 | 0.00 | 0.00 |
| ATOM | 1420 | HB2 | LYS | 93 | 85.093 | 46.128 | 70.634 | 0.00 | 0.00 |
| ATOM | 1421 | HB3 | LYS | 93 | 84.284 | 44.861 | 69.712 | 0.00 | 0.00 |
| ATOM | 1422 | CG  | LYS | 93 | 85.856 | 45.699 | 68.731 | 0.00 | 0.00 |
| ATOM | 1423 | HG2 | LYS | 93 | 86.465 | 46.603 | 68.706 | 0.00 | 0.00 |
| ATOM | 1424 | HG3 | LYS | 93 | 86.585 | 45.061 | 69.231 | 0.00 | 0.00 |
| ATOM | 1425 | CD  | LYS | 93 | 85.587 | 45.430 | 67.308 | 0.00 | 0.00 |
| ATOM | 1426 | HD2 | LYS | 93 | 84.567 | 45.751 | 67.099 | 0.00 | 0.00 |
| ATOM | 1427 | HD3 | LYS | 93 | 86.361 | 46.042 | 66.845 | 0.00 | 0.00 |
| ATOM | 1428 | CE  | LYS | 93 | 85.816 | 43.925 | 66.971 | 0.00 | 0.00 |
| ATOM | 1429 | HE2 | LYS | 93 | 86.781 | 43.587 | 67.351 | 0.00 | 0.00 |

|      |      |      |     |    |        |        |        |      |      |
|------|------|------|-----|----|--------|--------|--------|------|------|
| ATOM | 1430 | HE3  | LYS | 93 | 84.970 | 43.338 | 67.328 | 0.00 | 0.00 |
| ATOM | 1431 | NZ   | LYS | 93 | 85.825 | 43.733 | 65.539 | 0.00 | 0.00 |
| ATOM | 1432 | HZ1  | LYS | 93 | 84.818 | 43.658 | 65.496 | 0.00 | 0.00 |
| ATOM | 1433 | HZ2  | LYS | 93 | 86.154 | 44.529 | 65.012 | 0.00 | 0.00 |
| ATOM | 1434 | HZ3  | LYS | 93 | 86.298 | 42.887 | 65.255 | 0.00 | 0.00 |
| ATOM | 1435 | C    | LYS | 93 | 82.517 | 46.690 | 70.498 | 0.00 | 0.00 |
| ATOM | 1436 | O    | LYS | 93 | 82.592 | 47.388 | 71.504 | 0.00 | 0.00 |
| ATOM | 1437 | N    | LEU | 94 | 81.527 | 45.850 | 70.270 | 0.00 | 0.00 |
| ATOM | 1438 | H    | LEU | 94 | 81.510 | 45.513 | 69.318 | 0.00 | 0.00 |
| ATOM | 1439 | CA   | LEU | 94 | 80.504 | 45.624 | 71.212 | 0.00 | 0.00 |
| ATOM | 1440 | HA   | LEU | 94 | 80.309 | 46.641 | 71.552 | 0.00 | 0.00 |
| ATOM | 1441 | CB   | LEU | 94 | 79.285 | 45.205 | 70.412 | 0.00 | 0.00 |
| ATOM | 1442 | HB2  | LEU | 94 | 79.083 | 45.777 | 69.507 | 0.00 | 0.00 |
| ATOM | 1443 | HB3  | LEU | 94 | 79.551 | 44.198 | 70.091 | 0.00 | 0.00 |
| ATOM | 1444 | CG   | LEU | 94 | 78.035 | 45.234 | 71.274 | 0.00 | 0.00 |
| ATOM | 1445 | HG   | LEU | 94 | 78.231 | 44.547 | 72.098 | 0.00 | 0.00 |
| ATOM | 1446 | CD1  | LEU | 94 | 77.538 | 46.513 | 71.830 | 0.00 | 0.00 |
| ATOM | 1447 | 1HD1 | LEU | 94 | 77.109 | 47.160 | 71.065 | 0.00 | 0.00 |
| ATOM | 1448 | 2HD1 | LEU | 94 | 76.841 | 46.261 | 72.629 | 0.00 | 0.00 |
| ATOM | 1449 | 3HD1 | LEU | 94 | 78.284 | 47.119 | 72.344 | 0.00 | 0.00 |
| ATOM | 1450 | CD2  | LEU | 94 | 76.879 | 44.527 | 70.525 | 0.00 | 0.00 |
| ATOM | 1451 | 1HD2 | LEU | 94 | 77.125 | 43.468 | 70.437 | 0.00 | 0.00 |
| ATOM | 1452 | 2HD2 | LEU | 94 | 76.011 | 44.386 | 71.169 | 0.00 | 0.00 |
| ATOM | 1453 | 3HD2 | LEU | 94 | 76.654 | 44.945 | 69.544 | 0.00 | 0.00 |
| ATOM | 1454 | C    | LEU | 94 | 80.933 | 44.719 | 72.373 | 0.00 | 0.00 |
| ATOM | 1455 | O    | LEU | 94 | 81.351 | 43.585 | 72.196 | 0.00 | 0.00 |

ATOM 1456 N VAL 95 80.594 45.124 73.592 0.00 0.00  
ATOM 1457 H VAL 95 80.087 45.996 73.635 0.00 0.00  
ATOM 1458 CA VAL 95 80.682 44.322 74.824 0.00 0.00  
ATOM 1459 HA VAL 95 80.870 43.283 74.554 0.00 0.00  
ATOM 1460 CB VAL 95 81.785 44.797 75.771 0.00 0.00  
ATOM 1461 HB VAL 95 81.564 45.808 76.111 0.00 0.00  
ATOM 1462 CG1 VAL 95 81.970 43.848 76.957 0.00 0.00  
ATOM 1463 1HG1 VAL 95 82.187 42.834 76.622 0.00 0.00  
ATOM 1464 2HG1 VAL 95 82.846 44.269 77.452 0.00 0.00  
ATOM 1465 3HG1 VAL 95 81.134 44.030 77.633 0.00 0.00  
ATOM 1466 CG2 VAL 95 83.259 44.808 75.240 0.00 0.00  
ATOM 1467 1HG2 VAL 95 83.854 45.499 75.837 0.00 0.00  
ATOM 1468 2HG2 VAL 95 83.674 43.803 75.320 0.00 0.00  
ATOM 1469 3HG2 VAL 95 83.269 45.018 74.171 0.00 0.00  
ATOM 1470 C VAL 95 79.334 44.394 75.522 0.00 0.00  
ATOM 1471 O VAL 95 78.656 45.425 75.596 0.00 0.00  
ATOM 1472 N THR 96 78.918 43.275 76.069 0.00 0.00  
ATOM 1473 H THR 96 79.572 42.511 76.161 0.00 0.00  
ATOM 1474 CA THR 96 77.626 42.959 76.604 0.00 0.00  
ATOM 1475 HA THR 96 77.200 43.884 76.993 0.00 0.00  
ATOM 1476 CB THR 96 76.838 42.267 75.543 0.00 0.00  
ATOM 1477 HB THR 96 77.383 41.421 75.123 0.00 0.00  
ATOM 1478 CG2 THR 96 75.425 41.749 75.790 0.00 0.00  
ATOM 1479 1HG2 THR 96 75.357 40.900 76.471 0.00 0.00  
ATOM 1480 2HG2 THR 96 74.790 42.422 76.366 0.00 0.00  
ATOM 1481 3HG2 THR 96 75.012 41.489 74.815 0.00 0.00

|      |      |      |     |    |        |        |        |      |      |
|------|------|------|-----|----|--------|--------|--------|------|------|
| ATOM | 1482 | OG1  | THR | 96 | 76.658 | 43.106 | 74.390 | 0.00 | 0.00 |
| ATOM | 1483 | HG1  | THR | 96 | 76.659 | 42.536 | 73.617 | 0.00 | 0.00 |
| ATOM | 1484 | C    | THR | 96 | 77.769 | 41.973 | 77.808 | 0.00 | 0.00 |
| ATOM | 1485 | O    | THR | 96 | 78.484 | 41.022 | 77.683 | 0.00 | 0.00 |
| ATOM | 1486 | N    | VAL | 97 | 77.095 | 42.092 | 78.963 | 0.00 | 0.00 |
| ATOM | 1487 | H    | VAL | 97 | 76.770 | 43.043 | 79.065 | 0.00 | 0.00 |
| ATOM | 1488 | CA   | VAL | 97 | 77.114 | 41.241 | 80.173 | 0.00 | 0.00 |
| ATOM | 1489 | HA   | VAL | 97 | 77.572 | 40.285 | 79.919 | 0.00 | 0.00 |
| ATOM | 1490 | CB   | VAL | 97 | 77.966 | 41.840 | 81.331 | 0.00 | 0.00 |
| ATOM | 1491 | HB   | VAL | 97 | 77.323 | 42.505 | 81.908 | 0.00 | 0.00 |
| ATOM | 1492 | CG1  | VAL | 97 | 78.181 | 40.738 | 82.405 | 0.00 | 0.00 |
| ATOM | 1493 | 1HG1 | VAL | 97 | 78.651 | 39.827 | 82.036 | 0.00 | 0.00 |
| ATOM | 1494 | 2HG1 | VAL | 97 | 78.790 | 41.147 | 83.211 | 0.00 | 0.00 |
| ATOM | 1495 | 3HG1 | VAL | 97 | 77.269 | 40.355 | 82.865 | 0.00 | 0.00 |
| ATOM | 1496 | CG2  | VAL | 97 | 79.336 | 42.426 | 81.039 | 0.00 | 0.00 |
| ATOM | 1497 | 1HG2 | VAL | 97 | 79.835 | 42.869 | 81.901 | 0.00 | 0.00 |
| ATOM | 1498 | 2HG2 | VAL | 97 | 79.879 | 41.544 | 80.697 | 0.00 | 0.00 |
| ATOM | 1499 | 3HG2 | VAL | 97 | 79.165 | 43.139 | 80.233 | 0.00 | 0.00 |
| ATOM | 1500 | C    | VAL | 97 | 75.669 | 40.918 | 80.761 | 0.00 | 0.00 |
| ATOM | 1501 | O    | VAL | 97 | 74.860 | 41.914 | 80.936 | 0.00 | 0.00 |
| ATOM | 1502 | N    | HIE | 98 | 75.432 | 39.675 | 81.166 | 0.00 | 0.00 |
| ATOM | 1503 | H    | HIE | 98 | 76.195 | 39.016 | 81.092 | 0.00 | 0.00 |
| ATOM | 1504 | CA   | HIE | 98 | 74.101 | 39.227 | 81.660 | 0.00 | 0.00 |
| ATOM | 1505 | HA   | HIE | 98 | 73.296 | 39.934 | 81.459 | 0.00 | 0.00 |
| ATOM | 1506 | CB   | HIE | 98 | 73.697 | 37.968 | 80.992 | 0.00 | 0.00 |
| ATOM | 1507 | HB2  | HIE | 98 | 73.595 | 38.219 | 79.936 | 0.00 | 0.00 |

|      |      |      |     |     |        |        |        |      |      |
|------|------|------|-----|-----|--------|--------|--------|------|------|
| ATOM | 1508 | HB3  | HIE | 98  | 74.489 | 37.237 | 81.158 | 0.00 | 0.00 |
| ATOM | 1509 | CG   | HIE | 98  | 72.329 | 37.329 | 81.387 | 0.00 | 0.00 |
| ATOM | 1510 | ND1  | HIE | 98  | 72.132 | 36.479 | 82.501 | 0.00 | 0.00 |
| ATOM | 1511 | CE1  | HIE | 98  | 70.817 | 36.370 | 82.695 | 0.00 | 0.00 |
| ATOM | 1512 | HE1  | HIE | 98  | 70.349 | 35.923 | 83.560 | 0.00 | 0.00 |
| ATOM | 1513 | NE2  | HIE | 98  | 70.200 | 37.043 | 81.705 | 0.00 | 0.00 |
| ATOM | 1514 | HE2  | HIE | 98  | 69.205 | 37.203 | 81.636 | 0.00 | 0.00 |
| ATOM | 1515 | CD2  | HIE | 98  | 71.128 | 37.699 | 80.966 | 0.00 | 0.00 |
| ATOM | 1516 | HD2  | HIE | 98  | 71.019 | 38.419 | 80.169 | 0.00 | 0.00 |
| ATOM | 1517 | C    | HIE | 98  | 74.042 | 39.002 | 83.131 | 0.00 | 0.00 |
| ATOM | 1518 | O    | HIE | 98  | 74.979 | 38.304 | 83.646 | 0.00 | 0.00 |
| ATOM | 1519 | N    | ASN | 99  | 72.985 | 39.500 | 83.820 | 0.00 | 0.00 |
| ATOM | 1520 | H    | ASN | 99  | 72.236 | 39.910 | 83.281 | 0.00 | 0.00 |
| ATOM | 1521 | CA   | ASN | 99  | 72.757 | 39.505 | 85.263 | 0.00 | 0.00 |
| ATOM | 1522 | HA   | ASN | 99  | 72.163 | 40.388 | 85.503 | 0.00 | 0.00 |
| ATOM | 1523 | CB   | ASN | 99  | 71.865 | 38.305 | 85.588 | 0.00 | 0.00 |
| ATOM | 1524 | HB2  | ASN | 99  | 70.954 | 38.403 | 84.998 | 0.00 | 0.00 |
| ATOM | 1525 | HB3  | ASN | 99  | 72.451 | 37.439 | 85.279 | 0.00 | 0.00 |
| ATOM | 1526 | CG   | ASN | 99  | 71.524 | 38.225 | 86.993 | 0.00 | 0.00 |
| ATOM | 1527 | OD1  | ASN | 99  | 71.519 | 39.212 | 87.686 | 0.00 | 0.00 |
| ATOM | 1528 | ND2  | ASN | 99  | 71.297 | 37.048 | 87.501 | 0.00 | 0.00 |
| ATOM | 1529 | 1HD2 | ASN | 99  | 71.309 | 36.898 | 88.500 | 0.00 | 0.00 |
| ATOM | 1530 | 2HD2 | ASN | 99  | 71.071 | 36.233 | 86.950 | 0.00 | 0.00 |
| ATOM | 1531 | C    | ASN | 99  | 74.012 | 39.751 | 86.122 | 0.00 | 0.00 |
| ATOM | 1532 | O    | ASN | 99  | 74.454 | 38.749 | 86.779 | 0.00 | 0.00 |
| ATOM | 1533 | N    | PRO | 100 | 74.662 | 41.012 | 86.062 | 0.00 | 0.00 |

|      |      |      |     |     |        |        |        |      |      |
|------|------|------|-----|-----|--------|--------|--------|------|------|
| ATOM | 1534 | CD   | PRO | 100 | 74.291 | 42.054 | 85.062 | 0.00 | 0.00 |
| ATOM | 1535 | HD2  | PRO | 100 | 73.573 | 41.778 | 84.290 | 0.00 | 0.00 |
| ATOM | 1536 | HD3  | PRO | 100 | 73.920 | 42.909 | 85.628 | 0.00 | 0.00 |
| ATOM | 1537 | CG   | PRO | 100 | 75.617 | 42.410 | 84.470 | 0.00 | 0.00 |
| ATOM | 1538 | HG2  | PRO | 100 | 75.983 | 41.614 | 83.822 | 0.00 | 0.00 |
| ATOM | 1539 | HG3  | PRO | 100 | 75.670 | 43.393 | 84.001 | 0.00 | 0.00 |
| ATOM | 1540 | CB   | PRO | 100 | 76.467 | 42.572 | 85.713 | 0.00 | 0.00 |
| ATOM | 1541 | HB2  | PRO | 100 | 77.534 | 42.594 | 85.492 | 0.00 | 0.00 |
| ATOM | 1542 | HB3  | PRO | 100 | 76.318 | 43.411 | 86.392 | 0.00 | 0.00 |
| ATOM | 1543 | CA   | PRO | 100 | 76.008 | 41.336 | 86.503 | 0.00 | 0.00 |
| ATOM | 1544 | HA   | PRO | 100 | 76.627 | 40.498 | 86.183 | 0.00 | 0.00 |
| ATOM | 1545 | C    | PRO | 100 | 76.081 | 41.601 | 88.007 | 0.00 | 0.00 |
| ATOM | 1546 | O    | PRO | 100 | 77.193 | 41.845 | 88.474 | 0.00 | 0.00 |
| ATOM | 1547 | N    | ILE | 101 | 74.994 | 41.356 | 88.721 | 0.00 | 0.00 |
| ATOM | 1548 | H    | ILE | 101 | 74.139 | 41.537 | 88.214 | 0.00 | 0.00 |
| ATOM | 1549 | CA   | ILE | 101 | 74.944 | 41.455 | 90.175 | 0.00 | 0.00 |
| ATOM | 1550 | HA   | ILE | 101 | 75.960 | 41.717 | 90.470 | 0.00 | 0.00 |
| ATOM | 1551 | CB   | ILE | 101 | 74.006 | 42.514 | 90.711 | 0.00 | 0.00 |
| ATOM | 1552 | HB   | ILE | 101 | 73.012 | 42.171 | 90.423 | 0.00 | 0.00 |
| ATOM | 1553 | CG2  | ILE | 101 | 74.086 | 42.596 | 92.262 | 0.00 | 0.00 |
| ATOM | 1554 | 1HG2 | ILE | 101 | 73.274 | 43.227 | 92.624 | 0.00 | 0.00 |
| ATOM | 1555 | 2HG2 | ILE | 101 | 73.758 | 41.658 | 92.710 | 0.00 | 0.00 |
| ATOM | 1556 | 3HG2 | ILE | 101 | 75.100 | 42.768 | 92.624 | 0.00 | 0.00 |
| ATOM | 1557 | CG1  | ILE | 101 | 74.408 | 43.904 | 90.060 | 0.00 | 0.00 |
| ATOM | 1558 | 2HG1 | ILE | 101 | 75.443 | 44.130 | 90.319 | 0.00 | 0.00 |
| ATOM | 1559 | 3HG1 | ILE | 101 | 74.479 | 43.859 | 88.973 | 0.00 | 0.00 |

|      |      |      |     |     |        |        |        |      |      |
|------|------|------|-----|-----|--------|--------|--------|------|------|
| ATOM | 1560 | CD1  | ILE | 101 | 73.501 | 45.005 | 90.488 | 0.00 | 0.00 |
| ATOM | 1561 | 1HD1 | ILE | 101 | 73.714 | 45.150 | 91.547 | 0.00 | 0.00 |
| ATOM | 1562 | 2HD1 | ILE | 101 | 73.691 | 45.931 | 89.945 | 0.00 | 0.00 |
| ATOM | 1563 | 3HD1 | ILE | 101 | 72.465 | 44.769 | 90.246 | 0.00 | 0.00 |
| ATOM | 1564 | C    | ILE | 101 | 74.611 | 40.139 | 90.811 | 0.00 | 0.00 |
| ATOM | 1565 | O    | ILE | 101 | 73.588 | 39.494 | 90.448 | 0.00 | 0.00 |
| ATOM | 1566 | N    | ILC | 102 | 75.373 | 39.694 | 91.846 | 0.00 | 0.00 |
| ATOM | 1567 | H    | ILC | 102 | 76.087 | 40.343 | 92.144 | 0.00 | 0.00 |
| ATOM | 1568 | CA   | ILC | 102 | 75.120 | 38.416 | 92.625 | 0.00 | 0.00 |
| ATOM | 1569 | HA   | ILC | 102 | 74.552 | 37.727 | 91.999 | 0.00 | 0.00 |
| ATOM | 1570 | CB   | ILC | 102 | 76.492 | 37.740 | 92.946 | 0.00 | 0.00 |
| ATOM | 1571 | HB   | ILC | 102 | 76.907 | 38.220 | 93.832 | 0.00 | 0.00 |
| ATOM | 1572 | CG2  | ILC | 102 | 76.134 | 36.355 | 93.309 | 0.00 | 0.00 |
| ATOM | 1573 | 1HG2 | ILC | 102 | 75.305 | 36.303 | 94.014 | 0.00 | 0.00 |
| ATOM | 1574 | 2HG2 | ILC | 102 | 75.768 | 35.814 | 92.436 | 0.00 | 0.00 |
| ATOM | 1575 | 3HG2 | ILC | 102 | 77.047 | 35.888 | 93.679 | 0.00 | 0.00 |
| ATOM | 1576 | CG1  | ILC | 102 | 77.527 | 37.697 | 91.758 | 0.00 | 0.00 |
| ATOM | 1577 | 2HG1 | ILC | 102 | 77.148 | 37.134 | 90.905 | 0.00 | 0.00 |
| ATOM | 1578 | 3HG1 | ILC | 102 | 77.761 | 38.696 | 91.390 | 0.00 | 0.00 |
| ATOM | 1579 | CD1  | ILC | 102 | 78.843 | 37.137 | 92.325 | 0.00 | 0.00 |
| ATOM | 1580 | 1HD1 | ILC | 102 | 79.132 | 37.567 | 93.284 | 0.00 | 0.00 |
| ATOM | 1581 | 2HD1 | ILC | 102 | 78.730 | 36.069 | 92.514 | 0.00 | 0.00 |
| ATOM | 1582 | 3HD1 | ILC | 102 | 79.634 | 37.280 | 91.589 | 0.00 | 0.00 |
| ATOM | 1583 | C    | ILC | 102 | 74.326 | 38.819 | 93.824 | 0.00 | 0.00 |
| ATOM | 1584 | O    | ILC | 102 | 74.814 | 39.695 | 94.542 | 0.00 | 0.00 |
| ATOM | 1585 | OXT  | ILC | 102 | 73.241 | 38.271 | 93.967 | 0.00 | 0.00 |



|      |      |     |     |     |        |        |        |      |      |
|------|------|-----|-----|-----|--------|--------|--------|------|------|
| ATOM | 1586 | N   | MEN | 103 | 62.510 | 41.730 | 94.995 | 0.00 | 0.00 |
| ATOM | 1587 | H1  | MEN | 103 | 62.340 | 41.223 | 95.852 | 0.00 | 0.00 |
| ATOM | 1588 | H2  | MEN | 103 | 63.406 | 42.196 | 94.972 | 0.00 | 0.00 |
| ATOM | 1589 | H3  | MEN | 103 | 62.446 | 40.964 | 94.341 | 0.00 | 0.00 |
| ATOM | 1590 | CA  | MEN | 103 | 61.451 | 42.736 | 94.704 | 0.00 | 0.00 |
| ATOM | 1591 | HA  | MEN | 103 | 60.543 | 42.134 | 94.678 | 0.00 | 0.00 |
| ATOM | 1592 | CB  | MEN | 103 | 61.358 | 43.810 | 95.844 | 0.00 | 0.00 |
| ATOM | 1593 | HB2 | MEN | 103 | 61.185 | 43.242 | 96.759 | 0.00 | 0.00 |
| ATOM | 1594 | HB3 | MEN | 103 | 62.270 | 44.405 | 95.883 | 0.00 | 0.00 |
| ATOM | 1595 | CG  | MEN | 103 | 60.012 | 44.594 | 95.767 | 0.00 | 0.00 |
| ATOM | 1596 | HG2 | MEN | 103 | 59.280 | 43.856 | 95.440 | 0.00 | 0.00 |
| ATOM | 1597 | HG3 | MEN | 103 | 59.714 | 44.848 | 96.785 | 0.00 | 0.00 |
| ATOM | 1598 | SD  | MEN | 103 | 59.853 | 45.990 | 94.591 | 0.00 | 0.00 |
| ATOM | 1599 | CE  | MEN | 103 | 60.999 | 47.283 | 95.142 | 0.00 | 0.00 |
| ATOM | 1600 | HE1 | MEN | 103 | 60.556 | 48.275 | 95.048 | 0.00 | 0.00 |
| ATOM | 1601 | HE2 | MEN | 103 | 61.137 | 47.123 | 96.212 | 0.00 | 0.00 |
| ATOM | 1602 | HE3 | MEN | 103 | 61.955 | 47.151 | 94.636 | 0.00 | 0.00 |
| ATOM | 1603 | C   | MEN | 103 | 61.729 | 43.386 | 93.343 | 0.00 | 0.00 |
| ATOM | 1604 | O   | MEN | 103 | 62.604 | 44.260 | 93.236 | 0.00 | 0.00 |
| ATOM | 1605 | N   | ILE | 104 | 60.915 | 43.019 | 92.311 | 0.00 | 0.00 |
| ATOM | 1606 | H   | ILE | 104 | 60.203 | 42.308 | 92.399 | 0.00 | 0.00 |
| ATOM | 1607 | CA  | ILE | 104 | 60.925 | 43.739 | 91.026 | 0.00 | 0.00 |
| ATOM | 1608 | HA  | ILE | 104 | 61.882 | 44.262 | 91.028 | 0.00 | 0.00 |
| ATOM | 1609 | CB  | ILE | 104 | 60.920 | 42.906 | 89.727 | 0.00 | 0.00 |
| ATOM | 1610 | HB  | ILE | 104 | 61.410 | 41.955 | 89.935 | 0.00 | 0.00 |
| ATOM | 1611 | CG2 | ILE | 104 | 59.398 | 42.615 | 89.414 | 0.00 | 0.00 |

|      |      |      |     |     |        |        |        |      |      |
|------|------|------|-----|-----|--------|--------|--------|------|------|
| ATOM | 1612 | 1HG2 | ILE | 104 | 58.890 | 43.509 | 89.051 | 0.00 | 0.00 |
| ATOM | 1613 | 2HG2 | ILE | 104 | 59.255 | 41.927 | 88.581 | 0.00 | 0.00 |
| ATOM | 1614 | 3HG2 | ILE | 104 | 58.990 | 42.070 | 90.265 | 0.00 | 0.00 |
| ATOM | 1615 | CG1  | ILE | 104 | 61.619 | 43.594 | 88.526 | 0.00 | 0.00 |
| ATOM | 1616 | 2HG1 | ILE | 104 | 60.950 | 44.355 | 88.124 | 0.00 | 0.00 |
| ATOM | 1617 | 3HG1 | ILE | 104 | 62.599 | 43.941 | 88.855 | 0.00 | 0.00 |
| ATOM | 1618 | CD1  | ILE | 104 | 61.903 | 42.610 | 87.378 | 0.00 | 0.00 |
| ATOM | 1619 | 1HD1 | ILE | 104 | 62.324 | 43.183 | 86.552 | 0.00 | 0.00 |
| ATOM | 1620 | 2HD1 | ILE | 104 | 62.511 | 41.817 | 87.813 | 0.00 | 0.00 |
| ATOM | 1621 | 3HD1 | ILE | 104 | 60.908 | 42.252 | 87.115 | 0.00 | 0.00 |
| ATOM | 1622 | C    | ILE | 104 | 59.800 | 44.918 | 91.125 | 0.00 | 0.00 |
| ATOM | 1623 | O    | ILE | 104 | 58.640 | 44.742 | 91.500 | 0.00 | 0.00 |
| ATOM | 1624 | N    | PRO | 105 | 60.166 | 46.173 | 90.861 | 0.00 | 0.00 |
| ATOM | 1625 | CD   | PRO | 105 | 61.468 | 46.778 | 91.050 | 0.00 | 0.00 |
| ATOM | 1626 | HD2  | PRO | 105 | 62.026 | 46.348 | 91.881 | 0.00 | 0.00 |
| ATOM | 1627 | HD3  | PRO | 105 | 62.006 | 46.688 | 90.106 | 0.00 | 0.00 |
| ATOM | 1628 | CG   | PRO | 105 | 61.202 | 48.279 | 91.102 | 0.00 | 0.00 |
| ATOM | 1629 | HG2  | PRO | 105 | 61.078 | 48.701 | 92.099 | 0.00 | 0.00 |
| ATOM | 1630 | HG3  | PRO | 105 | 62.110 | 48.767 | 90.748 | 0.00 | 0.00 |
| ATOM | 1631 | CB   | PRO | 105 | 60.037 | 48.449 | 90.153 | 0.00 | 0.00 |
| ATOM | 1632 | HB2  | PRO | 105 | 59.576 | 49.409 | 90.387 | 0.00 | 0.00 |
| ATOM | 1633 | HB3  | PRO | 105 | 60.391 | 48.604 | 89.133 | 0.00 | 0.00 |
| ATOM | 1634 | CA   | PRO | 105 | 59.190 | 47.156 | 90.352 | 0.00 | 0.00 |
| ATOM | 1635 | HA   | PRO | 105 | 58.508 | 47.372 | 91.175 | 0.00 | 0.00 |
| ATOM | 1636 | C    | PRO | 105 | 58.530 | 46.663 | 89.138 | 0.00 | 0.00 |
| ATOM | 1637 | O    | PRO | 105 | 59.174 | 45.896 | 88.448 | 0.00 | 0.00 |

|      |      |     |     |     |        |        |        |      |      |
|------|------|-----|-----|-----|--------|--------|--------|------|------|
| ATOM | 1638 | N   | GLY | 106 | 57.378 | 47.217 | 88.648 | 0.00 | 0.00 |
| ATOM | 1639 | H   | GLY | 106 | 56.969 | 48.002 | 89.133 | 0.00 | 0.00 |
| ATOM | 1640 | CA  | GLY | 106 | 56.719 | 46.750 | 87.416 | 0.00 | 0.00 |
| ATOM | 1641 | HA2 | GLY | 106 | 55.858 | 47.361 | 87.144 | 0.00 | 0.00 |
| ATOM | 1642 | HA3 | GLY | 106 | 57.440 | 46.757 | 86.599 | 0.00 | 0.00 |
| ATOM | 1643 | C   | GLY | 106 | 56.301 | 45.302 | 87.408 | 0.00 | 0.00 |
| ATOM | 1644 | O   | GLY | 106 | 56.412 | 44.702 | 86.359 | 0.00 | 0.00 |
| ATOM | 1645 | N   | GLU | 107 | 55.701 | 44.770 | 88.452 | 0.00 | 0.00 |
| ATOM | 1646 | H   | GLU | 107 | 55.462 | 45.335 | 89.254 | 0.00 | 0.00 |
| ATOM | 1647 | CA  | GLU | 107 | 55.304 | 43.335 | 88.511 | 0.00 | 0.00 |
| ATOM | 1648 | HA  | GLU | 107 | 56.058 | 42.774 | 87.958 | 0.00 | 0.00 |
| ATOM | 1649 | CB  | GLU | 107 | 55.345 | 42.850 | 90.014 | 0.00 | 0.00 |
| ATOM | 1650 | HB2 | GLU | 107 | 56.277 | 43.262 | 90.402 | 0.00 | 0.00 |
| ATOM | 1651 | HB3 | GLU | 107 | 54.473 | 43.287 | 90.500 | 0.00 | 0.00 |
| ATOM | 1652 | CG  | GLU | 107 | 55.390 | 41.341 | 90.094 | 0.00 | 0.00 |
| ATOM | 1653 | HG2 | GLU | 107 | 54.492 | 40.913 | 89.649 | 0.00 | 0.00 |
| ATOM | 1654 | HG3 | GLU | 107 | 56.151 | 40.879 | 89.466 | 0.00 | 0.00 |
| ATOM | 1655 | CD  | GLU | 107 | 55.553 | 40.724 | 91.492 | 0.00 | 0.00 |
| ATOM | 1656 | OE1 | GLU | 107 | 55.508 | 39.468 | 91.636 | 0.00 | 0.00 |
| ATOM | 1657 | OE2 | GLU | 107 | 55.937 | 41.400 | 92.491 | 0.00 | 0.00 |
| ATOM | 1658 | C   | GLU | 107 | 53.975 | 43.039 | 87.882 | 0.00 | 0.00 |
| ATOM | 1659 | O   | GLU | 107 | 53.053 | 43.902 | 87.901 | 0.00 | 0.00 |
| ATOM | 1660 | N   | TYR | 108 | 53.772 | 41.909 | 87.276 | 0.00 | 0.00 |
| ATOM | 1661 | H   | TYR | 108 | 54.515 | 41.225 | 87.268 | 0.00 | 0.00 |
| ATOM | 1662 | CA  | TYR | 108 | 52.501 | 41.442 | 86.739 | 0.00 | 0.00 |
| ATOM | 1663 | HA  | TYR | 108 | 51.789 | 42.250 | 86.574 | 0.00 | 0.00 |

|      |      |     |     |     |        |        |        |      |      |
|------|------|-----|-----|-----|--------|--------|--------|------|------|
| ATOM | 1664 | CB  | TYR | 108 | 52.706 | 40.806 | 85.303 | 0.00 | 0.00 |
| ATOM | 1665 | HB2 | TYR | 108 | 53.542 | 40.111 | 85.388 | 0.00 | 0.00 |
| ATOM | 1666 | HB3 | TYR | 108 | 51.820 | 40.236 | 85.022 | 0.00 | 0.00 |
| ATOM | 1667 | CG  | TYR | 108 | 53.083 | 41.611 | 84.045 | 0.00 | 0.00 |
| ATOM | 1668 | CD1 | TYR | 108 | 53.106 | 40.849 | 82.839 | 0.00 | 0.00 |
| ATOM | 1669 | HD1 | TYR | 108 | 52.898 | 39.796 | 82.719 | 0.00 | 0.00 |
| ATOM | 1670 | CE1 | TYR | 108 | 53.578 | 41.470 | 81.645 | 0.00 | 0.00 |
| ATOM | 1671 | HE1 | TYR | 108 | 53.634 | 40.847 | 80.764 | 0.00 | 0.00 |
| ATOM | 1672 | CZ  | TYR | 108 | 53.866 | 42.879 | 81.642 | 0.00 | 0.00 |
| ATOM | 1673 | OH  | TYR | 108 | 54.382 | 43.384 | 80.495 | 0.00 | 0.00 |
| ATOM | 1674 | HH  | TYR | 108 | 54.541 | 42.686 | 79.855 | 0.00 | 0.00 |
| ATOM | 1675 | CE2 | TYR | 108 | 53.649 | 43.568 | 82.848 | 0.00 | 0.00 |
| ATOM | 1676 | HE2 | TYR | 108 | 53.674 | 44.646 | 82.779 | 0.00 | 0.00 |
| ATOM | 1677 | CD2 | TYR | 108 | 53.276 | 43.008 | 84.076 | 0.00 | 0.00 |
| ATOM | 1678 | HD2 | TYR | 108 | 53.343 | 43.625 | 84.960 | 0.00 | 0.00 |
| ATOM | 1679 | C   | TYR | 108 | 51.984 | 40.397 | 87.690 | 0.00 | 0.00 |
| ATOM | 1680 | O   | TYR | 108 | 52.745 | 39.612 | 88.226 | 0.00 | 0.00 |
| ATOM | 1681 | N   | HIE | 109 | 50.668 | 40.178 | 87.724 | 0.00 | 0.00 |
| ATOM | 1682 | H   | HIE | 109 | 50.057 | 40.829 | 87.252 | 0.00 | 0.00 |
| ATOM | 1683 | CA  | HIE | 109 | 49.961 | 39.039 | 88.287 | 0.00 | 0.00 |
| ATOM | 1684 | HA  | HIE | 109 | 50.721 | 38.278 | 88.462 | 0.00 | 0.00 |
| ATOM | 1685 | CB  | HIE | 109 | 49.095 | 39.559 | 89.464 | 0.00 | 0.00 |
| ATOM | 1686 | HB2 | HIE | 109 | 49.645 | 40.170 | 90.180 | 0.00 | 0.00 |
| ATOM | 1687 | HB3 | HIE | 109 | 48.419 | 40.316 | 89.066 | 0.00 | 0.00 |
| ATOM | 1688 | CG  | HIE | 109 | 48.404 | 38.432 | 90.247 | 0.00 | 0.00 |
| ATOM | 1689 | ND1 | HIE | 109 | 47.339 | 38.669 | 91.123 | 0.00 | 0.00 |

|      |      |      |     |     |        |        |        |      |      |
|------|------|------|-----|-----|--------|--------|--------|------|------|
| ATOM | 1690 | CE1  | HIE | 109 | 47.182 | 37.535 | 91.873 | 0.00 | 0.00 |
| ATOM | 1691 | HE1  | HIE | 109 | 46.480 | 37.377 | 92.679 | 0.00 | 0.00 |
| ATOM | 1692 | NE2  | HIE | 109 | 48.123 | 36.617 | 91.561 | 0.00 | 0.00 |
| ATOM | 1693 | HE2  | HIE | 109 | 48.488 | 35.872 | 92.138 | 0.00 | 0.00 |
| ATOM | 1694 | CD2  | HIE | 109 | 48.882 | 37.153 | 90.543 | 0.00 | 0.00 |
| ATOM | 1695 | HD2  | HIE | 109 | 49.848 | 36.761 | 90.261 | 0.00 | 0.00 |
| ATOM | 1696 | C    | HIE | 109 | 49.112 | 38.515 | 87.127 | 0.00 | 0.00 |
| ATOM | 1697 | O    | HIE | 109 | 48.122 | 39.032 | 86.713 | 0.00 | 0.00 |
| ATOM | 1698 | N    | VAL | 110 | 49.501 | 37.334 | 86.648 | 0.00 | 0.00 |
| ATOM | 1699 | H    | VAL | 110 | 50.307 | 36.866 | 87.035 | 0.00 | 0.00 |
| ATOM | 1700 | CA   | VAL | 110 | 48.844 | 36.626 | 85.578 | 0.00 | 0.00 |
| ATOM | 1701 | HA   | VAL | 110 | 48.027 | 37.204 | 85.146 | 0.00 | 0.00 |
| ATOM | 1702 | CB   | VAL | 110 | 49.879 | 36.484 | 84.428 | 0.00 | 0.00 |
| ATOM | 1703 | HB   | VAL | 110 | 50.587 | 35.684 | 84.646 | 0.00 | 0.00 |
| ATOM | 1704 | CG1  | VAL | 110 | 49.081 | 36.121 | 83.183 | 0.00 | 0.00 |
| ATOM | 1705 | 1HG1 | VAL | 110 | 48.849 | 35.057 | 83.243 | 0.00 | 0.00 |
| ATOM | 1706 | 2HG1 | VAL | 110 | 48.116 | 36.620 | 83.092 | 0.00 | 0.00 |
| ATOM | 1707 | 3HG1 | VAL | 110 | 49.662 | 36.182 | 82.263 | 0.00 | 0.00 |
| ATOM | 1708 | CG2  | VAL | 110 | 50.706 | 37.724 | 84.121 | 0.00 | 0.00 |
| ATOM | 1709 | 1HG2 | VAL | 110 | 51.203 | 37.507 | 83.176 | 0.00 | 0.00 |
| ATOM | 1710 | 2HG2 | VAL | 110 | 50.062 | 38.594 | 83.999 | 0.00 | 0.00 |
| ATOM | 1711 | 3HG2 | VAL | 110 | 51.409 | 37.849 | 84.945 | 0.00 | 0.00 |
| ATOM | 1712 | C    | VAL | 110 | 48.369 | 35.252 | 86.075 | 0.00 | 0.00 |
| ATOM | 1713 | O    | VAL | 110 | 49.248 | 34.432 | 86.443 | 0.00 | 0.00 |
| ATOM | 1714 | N    | LYS | 111 | 47.094 | 34.978 | 86.162 | 0.00 | 0.00 |
| ATOM | 1715 | H    | LYS | 111 | 46.464 | 35.634 | 85.722 | 0.00 | 0.00 |

|      |      |     |     |     |        |        |        |      |      |
|------|------|-----|-----|-----|--------|--------|--------|------|------|
| ATOM | 1716 | CA  | LYS | 111 | 46.521 | 33.741 | 86.572 | 0.00 | 0.00 |
| ATOM | 1717 | HA  | LYS | 111 | 46.898 | 33.382 | 87.529 | 0.00 | 0.00 |
| ATOM | 1718 | CB  | LYS | 111 | 44.998 | 33.908 | 86.776 | 0.00 | 0.00 |
| ATOM | 1719 | HB2 | LYS | 111 | 44.625 | 34.439 | 85.900 | 0.00 | 0.00 |
| ATOM | 1720 | HB3 | LYS | 111 | 44.546 | 32.936 | 86.976 | 0.00 | 0.00 |
| ATOM | 1721 | CG  | LYS | 111 | 44.732 | 34.761 | 88.014 | 0.00 | 0.00 |
| ATOM | 1722 | HG2 | LYS | 111 | 45.374 | 35.631 | 88.155 | 0.00 | 0.00 |
| ATOM | 1723 | HG3 | LYS | 111 | 43.724 | 35.175 | 88.005 | 0.00 | 0.00 |
| ATOM | 1724 | CD  | LYS | 111 | 44.701 | 34.021 | 89.347 | 0.00 | 0.00 |
| ATOM | 1725 | HD2 | LYS | 111 | 43.780 | 33.465 | 89.522 | 0.00 | 0.00 |
| ATOM | 1726 | HD3 | LYS | 111 | 45.619 | 33.446 | 89.465 | 0.00 | 0.00 |
| ATOM | 1727 | CE  | LYS | 111 | 44.880 | 35.037 | 90.470 | 0.00 | 0.00 |
| ATOM | 1728 | HE2 | LYS | 111 | 45.188 | 34.406 | 91.303 | 0.00 | 0.00 |
| ATOM | 1729 | HE3 | LYS | 111 | 45.638 | 35.780 | 90.223 | 0.00 | 0.00 |
| ATOM | 1730 | NZ  | LYS | 111 | 43.677 | 35.860 | 90.627 | 0.00 | 0.00 |
| ATOM | 1731 | HZ1 | LYS | 111 | 43.682 | 36.307 | 91.533 | 0.00 | 0.00 |
| ATOM | 1732 | HZ2 | LYS | 111 | 43.647 | 36.709 | 90.080 | 0.00 | 0.00 |
| ATOM | 1733 | HZ3 | LYS | 111 | 42.766 | 35.496 | 90.388 | 0.00 | 0.00 |
| ATOM | 1734 | C   | LYS | 111 | 46.810 | 32.612 | 85.555 | 0.00 | 0.00 |
| ATOM | 1735 | O   | LYS | 111 | 47.081 | 32.770 | 84.348 | 0.00 | 0.00 |
| ATOM | 1736 | N   | PRO | 112 | 46.590 | 31.337 | 85.973 | 0.00 | 0.00 |
| ATOM | 1737 | CD  | PRO | 112 | 46.577 | 30.933 | 87.360 | 0.00 | 0.00 |
| ATOM | 1738 | HD2 | PRO | 112 | 47.371 | 31.292 | 88.015 | 0.00 | 0.00 |
| ATOM | 1739 | HD3 | PRO | 112 | 45.522 | 30.994 | 87.629 | 0.00 | 0.00 |
| ATOM | 1740 | CG  | PRO | 112 | 46.743 | 29.421 | 87.346 | 0.00 | 0.00 |
| ATOM | 1741 | HG2 | PRO | 112 | 47.791 | 29.124 | 87.351 | 0.00 | 0.00 |

|      |      |     |     |     |        |        |        |      |      |
|------|------|-----|-----|-----|--------|--------|--------|------|------|
| ATOM | 1742 | HG3 | PRO | 112 | 46.272 | 28.962 | 88.215 | 0.00 | 0.00 |
| ATOM | 1743 | CB  | PRO | 112 | 46.017 | 28.993 | 86.059 | 0.00 | 0.00 |
| ATOM | 1744 | HB2 | PRO | 112 | 46.453 | 28.084 | 85.646 | 0.00 | 0.00 |
| ATOM | 1745 | HB3 | PRO | 112 | 44.972 | 28.687 | 86.109 | 0.00 | 0.00 |
| ATOM | 1746 | CA  | PRO | 112 | 46.264 | 30.165 | 85.121 | 0.00 | 0.00 |
| ATOM | 1747 | HA  | PRO | 112 | 47.089 | 29.955 | 84.441 | 0.00 | 0.00 |
| ATOM | 1748 | C   | PRO | 112 | 45.096 | 30.431 | 84.212 | 0.00 | 0.00 |
| ATOM | 1749 | O   | PRO | 112 | 44.112 | 31.088 | 84.579 | 0.00 | 0.00 |
| ATOM | 1750 | N   | GLY | 113 | 45.154 | 29.809 | 83.065 | 0.00 | 0.00 |
| ATOM | 1751 | H   | GLY | 113 | 45.920 | 29.164 | 82.934 | 0.00 | 0.00 |
| ATOM | 1752 | CA  | GLY | 113 | 44.100 | 29.770 | 82.082 | 0.00 | 0.00 |
| ATOM | 1753 | HA2 | GLY | 113 | 43.531 | 28.860 | 82.272 | 0.00 | 0.00 |
| ATOM | 1754 | HA3 | GLY | 113 | 43.609 | 30.740 | 82.166 | 0.00 | 0.00 |
| ATOM | 1755 | C   | GLY | 113 | 44.470 | 29.669 | 80.627 | 0.00 | 0.00 |
| ATOM | 1756 | O   | GLY | 113 | 45.671 | 29.792 | 80.267 | 0.00 | 0.00 |
| ATOM | 1757 | N   | GLN | 114 | 43.468 | 29.465 | 79.694 | 0.00 | 0.00 |
| ATOM | 1758 | H   | GLN | 114 | 42.567 | 29.684 | 80.095 | 0.00 | 0.00 |
| ATOM | 1759 | CA  | GLN | 114 | 43.659 | 29.130 | 78.321 | 0.00 | 0.00 |
| ATOM | 1760 | HA  | GLN | 114 | 44.715 | 29.322 | 78.134 | 0.00 | 0.00 |
| ATOM | 1761 | CB  | GLN | 114 | 43.459 | 27.605 | 77.900 | 0.00 | 0.00 |
| ATOM | 1762 | HB2 | GLN | 114 | 42.400 | 27.352 | 77.964 | 0.00 | 0.00 |
| ATOM | 1763 | HB3 | GLN | 114 | 43.880 | 27.495 | 76.900 | 0.00 | 0.00 |
| ATOM | 1764 | CG  | GLN | 114 | 44.142 | 26.486 | 78.791 | 0.00 | 0.00 |
| ATOM | 1765 | HG2 | GLN | 114 | 43.696 | 26.528 | 79.785 | 0.00 | 0.00 |
| ATOM | 1766 | HG3 | GLN | 114 | 44.123 | 25.475 | 78.384 | 0.00 | 0.00 |
| ATOM | 1767 | CD  | GLN | 114 | 45.633 | 26.710 | 79.030 | 0.00 | 0.00 |

|      |      |      |     |     |        |        |        |      |      |
|------|------|------|-----|-----|--------|--------|--------|------|------|
| ATOM | 1768 | OE1  | GLN | 114 | 46.183 | 26.668 | 80.169 | 0.00 | 0.00 |
| ATOM | 1769 | NE2  | GLN | 114 | 46.284 | 26.957 | 77.939 | 0.00 | 0.00 |
| ATOM | 1770 | 1HE2 | GLN | 114 | 47.285 | 26.980 | 78.075 | 0.00 | 0.00 |
| ATOM | 1771 | 2HE2 | GLN | 114 | 45.866 | 27.030 | 77.023 | 0.00 | 0.00 |
| ATOM | 1772 | C    | GLN | 114 | 42.844 | 29.996 | 77.386 | 0.00 | 0.00 |
| ATOM | 1773 | O    | GLN | 114 | 41.698 | 30.255 | 77.607 | 0.00 | 0.00 |
| ATOM | 1774 | N    | ILE | 115 | 43.504 | 30.443 | 76.371 | 0.00 | 0.00 |
| ATOM | 1775 | H    | ILE | 115 | 44.452 | 30.100 | 76.311 | 0.00 | 0.00 |
| ATOM | 1776 | CA   | ILE | 115 | 43.004 | 31.323 | 75.328 | 0.00 | 0.00 |
| ATOM | 1777 | HA   | ILE | 115 | 41.964 | 31.493 | 75.606 | 0.00 | 0.00 |
| ATOM | 1778 | CB   | ILE | 115 | 43.962 | 32.607 | 75.365 | 0.00 | 0.00 |
| ATOM | 1779 | HB   | ILE | 115 | 44.985 | 32.245 | 75.261 | 0.00 | 0.00 |
| ATOM | 1780 | CG2  | ILE | 115 | 43.775 | 33.571 | 74.137 | 0.00 | 0.00 |
| ATOM | 1781 | 1HG2 | ILE | 115 | 42.697 | 33.730 | 74.116 | 0.00 | 0.00 |
| ATOM | 1782 | 2HG2 | ILE | 115 | 44.347 | 34.481 | 74.321 | 0.00 | 0.00 |
| ATOM | 1783 | 3HG2 | ILE | 115 | 44.057 | 33.110 | 73.191 | 0.00 | 0.00 |
| ATOM | 1784 | CG1  | ILE | 115 | 43.965 | 33.352 | 76.717 | 0.00 | 0.00 |
| ATOM | 1785 | 2HG1 | ILE | 115 | 42.955 | 33.724 | 76.892 | 0.00 | 0.00 |
| ATOM | 1786 | 3HG1 | ILE | 115 | 44.165 | 32.555 | 77.434 | 0.00 | 0.00 |
| ATOM | 1787 | CD1  | ILE | 115 | 44.783 | 34.625 | 76.937 | 0.00 | 0.00 |
| ATOM | 1788 | 1HD1 | ILE | 115 | 45.847 | 34.467 | 76.757 | 0.00 | 0.00 |
| ATOM | 1789 | 2HD1 | ILE | 115 | 44.431 | 35.392 | 76.248 | 0.00 | 0.00 |
| ATOM | 1790 | 3HD1 | ILE | 115 | 44.595 | 34.993 | 77.946 | 0.00 | 0.00 |
| ATOM | 1791 | C    | ILE | 115 | 43.069 | 30.666 | 73.913 | 0.00 | 0.00 |
| ATOM | 1792 | O    | ILE | 115 | 44.155 | 30.488 | 73.366 | 0.00 | 0.00 |
| ATOM | 1793 | N    | ALA | 116 | 41.907 | 30.175 | 73.394 | 0.00 | 0.00 |



|      |      |      |     |     |        |        |        |      |      |
|------|------|------|-----|-----|--------|--------|--------|------|------|
| ATOM | 1794 | H    | ALA | 116 | 41.103 | 30.418 | 73.955 | 0.00 | 0.00 |
| ATOM | 1795 | CA   | ALA | 116 | 41.837 | 29.515 | 72.116 | 0.00 | 0.00 |
| ATOM | 1796 | HA   | ALA | 116 | 42.777 | 28.982 | 71.977 | 0.00 | 0.00 |
| ATOM | 1797 | CB   | ALA | 116 | 40.739 | 28.432 | 72.048 | 0.00 | 0.00 |
| ATOM | 1798 | HB1  | ALA | 116 | 40.869 | 27.674 | 71.275 | 0.00 | 0.00 |
| ATOM | 1799 | HB2  | ALA | 116 | 40.756 | 27.870 | 72.982 | 0.00 | 0.00 |
| ATOM | 1800 | HB3  | ALA | 116 | 39.748 | 28.848 | 71.868 | 0.00 | 0.00 |
| ATOM | 1801 | C    | ALA | 116 | 41.731 | 30.565 | 71.020 | 0.00 | 0.00 |
| ATOM | 1802 | O    | ALA | 116 | 40.994 | 31.594 | 71.080 | 0.00 | 0.00 |
| ATOM | 1803 | N    | LEU | 117 | 42.543 | 30.346 | 69.950 | 0.00 | 0.00 |
| ATOM | 1804 | H    | LEU | 117 | 43.167 | 29.552 | 69.974 | 0.00 | 0.00 |
| ATOM | 1805 | CA   | LEU | 117 | 42.815 | 31.422 | 69.012 | 0.00 | 0.00 |
| ATOM | 1806 | HA   | LEU | 117 | 42.521 | 32.411 | 69.362 | 0.00 | 0.00 |
| ATOM | 1807 | CB   | LEU | 117 | 44.293 | 31.605 | 68.619 | 0.00 | 0.00 |
| ATOM | 1808 | HB2  | LEU | 117 | 44.542 | 30.660 | 68.136 | 0.00 | 0.00 |
| ATOM | 1809 | HB3  | LEU | 117 | 44.473 | 32.384 | 67.878 | 0.00 | 0.00 |
| ATOM | 1810 | CG   | LEU | 117 | 45.229 | 31.910 | 69.824 | 0.00 | 0.00 |
| ATOM | 1811 | HG   | LEU | 117 | 45.084 | 31.121 | 70.562 | 0.00 | 0.00 |
| ATOM | 1812 | CD1  | LEU | 117 | 46.600 | 32.054 | 69.161 | 0.00 | 0.00 |
| ATOM | 1813 | 1HD1 | LEU | 117 | 47.387 | 32.114 | 69.913 | 0.00 | 0.00 |
| ATOM | 1814 | 2HD1 | LEU | 117 | 46.821 | 31.291 | 68.415 | 0.00 | 0.00 |
| ATOM | 1815 | 3HD1 | LEU | 117 | 46.588 | 33.041 | 68.697 | 0.00 | 0.00 |
| ATOM | 1816 | CD2  | LEU | 117 | 44.874 | 33.081 | 70.660 | 0.00 | 0.00 |
| ATOM | 1817 | 1HD2 | LEU | 117 | 43.835 | 32.940 | 70.959 | 0.00 | 0.00 |
| ATOM | 1818 | 2HD2 | LEU | 117 | 45.546 | 33.214 | 71.508 | 0.00 | 0.00 |
| ATOM | 1819 | 3HD2 | LEU | 117 | 44.948 | 34.027 | 70.126 | 0.00 | 0.00 |

|      |      |      |     |     |        |        |        |      |      |
|------|------|------|-----|-----|--------|--------|--------|------|------|
| ATOM | 1820 | C    | LEU | 117 | 42.050 | 31.189 | 67.702 | 0.00 | 0.00 |
| ATOM | 1821 | O    | LEU | 117 | 41.812 | 30.080 | 67.218 | 0.00 | 0.00 |
| ATOM | 1822 | N    | ASN | 118 | 41.648 | 32.337 | 67.097 | 0.00 | 0.00 |
| ATOM | 1823 | H    | ASN | 118 | 41.785 | 33.237 | 67.535 | 0.00 | 0.00 |
| ATOM | 1824 | CA   | ASN | 118 | 40.944 | 32.440 | 65.854 | 0.00 | 0.00 |
| ATOM | 1825 | HA   | ASN | 118 | 40.295 | 33.275 | 66.118 | 0.00 | 0.00 |
| ATOM | 1826 | CB   | ASN | 118 | 41.876 | 32.787 | 64.631 | 0.00 | 0.00 |
| ATOM | 1827 | HB2  | ASN | 118 | 41.346 | 32.900 | 63.686 | 0.00 | 0.00 |
| ATOM | 1828 | HB3  | ASN | 118 | 42.280 | 33.776 | 64.848 | 0.00 | 0.00 |
| ATOM | 1829 | CG   | ASN | 118 | 43.006 | 31.803 | 64.427 | 0.00 | 0.00 |
| ATOM | 1830 | OD1  | ASN | 118 | 44.184 | 32.140 | 64.513 | 0.00 | 0.00 |
| ATOM | 1831 | ND2  | ASN | 118 | 42.727 | 30.550 | 64.289 | 0.00 | 0.00 |
| ATOM | 1832 | 1HD2 | ASN | 118 | 43.413 | 29.840 | 64.501 | 0.00 | 0.00 |
| ATOM | 1833 | 2HD2 | ASN | 118 | 41.737 | 30.349 | 64.313 | 0.00 | 0.00 |
| ATOM | 1834 | C    | ASN | 118 | 39.931 | 31.319 | 65.567 | 0.00 | 0.00 |
| ATOM | 1835 | O    | ASN | 118 | 40.024 | 30.551 | 64.586 | 0.00 | 0.00 |
| ATOM | 1836 | N    | THR | 119 | 39.037 | 31.093 | 66.520 | 0.00 | 0.00 |
| ATOM | 1837 | H    | THR | 119 | 38.937 | 31.833 | 67.201 | 0.00 | 0.00 |
| ATOM | 1838 | CA   | THR | 119 | 38.136 | 29.934 | 66.578 | 0.00 | 0.00 |
| ATOM | 1839 | HA   | THR | 119 | 38.650 | 29.006 | 66.323 | 0.00 | 0.00 |
| ATOM | 1840 | CB   | THR | 119 | 37.638 | 29.594 | 68.016 | 0.00 | 0.00 |
| ATOM | 1841 | HB   | THR | 119 | 36.825 | 28.876 | 67.912 | 0.00 | 0.00 |
| ATOM | 1842 | CG2  | THR | 119 | 38.791 | 28.851 | 68.742 | 0.00 | 0.00 |
| ATOM | 1843 | 1HG2 | THR | 119 | 38.772 | 27.798 | 68.461 | 0.00 | 0.00 |
| ATOM | 1844 | 2HG2 | THR | 119 | 39.785 | 29.229 | 68.505 | 0.00 | 0.00 |
| ATOM | 1845 | 3HG2 | THR | 119 | 38.594 | 28.911 | 69.812 | 0.00 | 0.00 |

|      |      |     |     |     |        |        |        |      |      |
|------|------|-----|-----|-----|--------|--------|--------|------|------|
| ATOM | 1846 | OG1 | THR | 119 | 37.155 | 30.743 | 68.574 | 0.00 | 0.00 |
| ATOM | 1847 | HG1 | THR | 119 | 37.956 | 31.187 | 68.862 | 0.00 | 0.00 |
| ATOM | 1848 | C   | THR | 119 | 36.906 | 30.008 | 65.713 | 0.00 | 0.00 |
| ATOM | 1849 | O   | THR | 119 | 36.366 | 31.078 | 65.438 | 0.00 | 0.00 |
| ATOM | 1850 | N   | GLY | 120 | 36.220 | 28.906 | 65.345 | 0.00 | 0.00 |
| ATOM | 1851 | H   | GLY | 120 | 36.644 | 28.003 | 65.507 | 0.00 | 0.00 |
| ATOM | 1852 | CA  | GLY | 120 | 34.984 | 28.806 | 64.610 | 0.00 | 0.00 |
| ATOM | 1853 | HA2 | GLY | 120 | 34.623 | 27.780 | 64.672 | 0.00 | 0.00 |
| ATOM | 1854 | HA3 | GLY | 120 | 34.226 | 29.413 | 65.106 | 0.00 | 0.00 |
| ATOM | 1855 | C   | GLY | 120 | 35.147 | 29.171 | 63.131 | 0.00 | 0.00 |
| ATOM | 1856 | O   | GLY | 120 | 34.236 | 28.866 | 62.297 | 0.00 | 0.00 |
| ATOM | 1857 | N   | ARG | 121 | 36.338 | 29.674 | 62.731 | 0.00 | 0.00 |
| ATOM | 1858 | H   | ARG | 121 | 37.041 | 29.840 | 63.437 | 0.00 | 0.00 |
| ATOM | 1859 | CA  | ARG | 121 | 36.712 | 30.085 | 61.346 | 0.00 | 0.00 |
| ATOM | 1860 | HA  | ARG | 121 | 35.813 | 30.418 | 60.827 | 0.00 | 0.00 |
| ATOM | 1861 | CB  | ARG | 121 | 37.719 | 31.229 | 61.368 | 0.00 | 0.00 |
| ATOM | 1862 | HB2 | ARG | 121 | 38.542 | 30.860 | 61.981 | 0.00 | 0.00 |
| ATOM | 1863 | HB3 | ARG | 121 | 38.122 | 31.373 | 60.365 | 0.00 | 0.00 |
| ATOM | 1864 | CG  | ARG | 121 | 37.201 | 32.574 | 61.931 | 0.00 | 0.00 |
| ATOM | 1865 | HG2 | ARG | 121 | 36.719 | 33.202 | 61.181 | 0.00 | 0.00 |
| ATOM | 1866 | HG3 | ARG | 121 | 36.474 | 32.338 | 62.708 | 0.00 | 0.00 |
| ATOM | 1867 | CD  | ARG | 121 | 38.372 | 33.443 | 62.404 | 0.00 | 0.00 |
| ATOM | 1868 | HD2 | ARG | 121 | 37.929 | 34.307 | 62.898 | 0.00 | 0.00 |
| ATOM | 1869 | HD3 | ARG | 121 | 39.042 | 32.910 | 63.078 | 0.00 | 0.00 |
| ATOM | 1870 | NE  | ARG | 121 | 39.176 | 33.695 | 61.186 | 0.00 | 0.00 |
| ATOM | 1871 | HE  | ARG | 121 | 39.147 | 33.107 | 60.366 | 0.00 | 0.00 |

|      |      |      |     |     |        |        |        |      |      |
|------|------|------|-----|-----|--------|--------|--------|------|------|
| ATOM | 1872 | CZ   | ARG | 121 | 40.171 | 34.598 | 61.135 | 0.00 | 0.00 |
| ATOM | 1873 | NH1  | ARG | 121 | 40.472 | 35.387 | 62.156 | 0.00 | 0.00 |
| ATOM | 1874 | 1HH1 | ARG | 121 | 41.339 | 35.904 | 62.128 | 0.00 | 0.00 |
| ATOM | 1875 | 2HH1 | ARG | 121 | 39.876 | 35.582 | 62.948 | 0.00 | 0.00 |
| ATOM | 1876 | NH2  | ARG | 121 | 40.977 | 34.739 | 60.146 | 0.00 | 0.00 |
| ATOM | 1877 | 1HH2 | ARG | 121 | 41.730 | 35.410 | 60.198 | 0.00 | 0.00 |
| ATOM | 1878 | 2HH2 | ARG | 121 | 40.937 | 34.062 | 59.398 | 0.00 | 0.00 |
| ATOM | 1879 | C    | ARG | 121 | 37.351 | 28.864 | 60.669 | 0.00 | 0.00 |
| ATOM | 1880 | O    | ARG | 121 | 38.018 | 28.044 | 61.281 | 0.00 | 0.00 |
| ATOM | 1881 | N    | ALA | 122 | 37.118 | 28.771 | 59.393 | 0.00 | 0.00 |
| ATOM | 1882 | H    | ALA | 122 | 36.597 | 29.440 | 58.844 | 0.00 | 0.00 |
| ATOM | 1883 | CA   | ALA | 122 | 37.430 | 27.625 | 58.622 | 0.00 | 0.00 |
| ATOM | 1884 | HA   | ALA | 122 | 36.945 | 26.750 | 59.055 | 0.00 | 0.00 |
| ATOM | 1885 | CB   | ALA | 122 | 36.946 | 27.872 | 57.173 | 0.00 | 0.00 |
| ATOM | 1886 | HB1  | ALA | 122 | 35.869 | 27.711 | 57.133 | 0.00 | 0.00 |
| ATOM | 1887 | HB2  | ALA | 122 | 37.303 | 28.818 | 56.764 | 0.00 | 0.00 |
| ATOM | 1888 | HB3  | ALA | 122 | 37.266 | 27.046 | 56.538 | 0.00 | 0.00 |
| ATOM | 1889 | C    | ALA | 122 | 38.906 | 27.299 | 58.682 | 0.00 | 0.00 |
| ATOM | 1890 | O    | ALA | 122 | 39.795 | 28.166 | 58.547 | 0.00 | 0.00 |
| ATOM | 1891 | N    | THR | 123 | 39.199 | 26.002 | 58.810 | 0.00 | 0.00 |
| ATOM | 1892 | H    | THR | 123 | 38.460 | 25.314 | 58.770 | 0.00 | 0.00 |
| ATOM | 1893 | CA   | THR | 123 | 40.586 | 25.480 | 58.916 | 0.00 | 0.00 |
| ATOM | 1894 | HA   | THR | 123 | 41.256 | 26.281 | 58.606 | 0.00 | 0.00 |
| ATOM | 1895 | CB   | THR | 123 | 40.914 | 24.995 | 60.347 | 0.00 | 0.00 |
| ATOM | 1896 | HB   | THR | 123 | 41.902 | 24.536 | 60.310 | 0.00 | 0.00 |
| ATOM | 1897 | CG2  | THR | 123 | 40.932 | 26.205 | 61.273 | 0.00 | 0.00 |

|      |      |      |     |     |        |        |        |      |      |
|------|------|------|-----|-----|--------|--------|--------|------|------|
| ATOM | 1898 | 1HG2 | THR | 123 | 40.984 | 25.910 | 62.321 | 0.00 | 0.00 |
| ATOM | 1899 | 2HG2 | THR | 123 | 41.765 | 26.812 | 60.919 | 0.00 | 0.00 |
| ATOM | 1900 | 3HG2 | THR | 123 | 40.105 | 26.887 | 61.075 | 0.00 | 0.00 |
| ATOM | 1901 | OG1  | THR | 123 | 40.071 | 24.030 | 60.884 | 0.00 | 0.00 |
| ATOM | 1902 | HG1  | THR | 123 | 39.170 | 24.247 | 60.633 | 0.00 | 0.00 |
| ATOM | 1903 | C    | THR | 123 | 40.849 | 24.379 | 57.890 | 0.00 | 0.00 |
| ATOM | 1904 | O    | THR | 123 | 39.923 | 23.867 | 57.283 | 0.00 | 0.00 |
| ATOM | 1905 | N    | CYS | 124 | 42.152 | 24.057 | 57.683 | 0.00 | 0.00 |
| ATOM | 1906 | H    | CYS | 124 | 42.877 | 24.539 | 58.196 | 0.00 | 0.00 |
| ATOM | 1907 | CA   | CYS | 124 | 42.625 | 22.860 | 56.934 | 0.00 | 0.00 |
| ATOM | 1908 | HA   | CYS | 124 | 41.958 | 22.031 | 57.174 | 0.00 | 0.00 |
| ATOM | 1909 | CB   | CYS | 124 | 42.630 | 23.111 | 55.438 | 0.00 | 0.00 |
| ATOM | 1910 | HB2  | CYS | 124 | 42.946 | 22.253 | 54.845 | 0.00 | 0.00 |
| ATOM | 1911 | HB3  | CYS | 124 | 41.566 | 23.129 | 55.205 | 0.00 | 0.00 |
| ATOM | 1912 | SG   | CYS | 124 | 43.694 | 24.382 | 54.779 | 0.00 | 0.00 |
| ATOM | 1913 | HG   | CYS | 124 | 43.275 | 24.322 | 53.512 | 0.00 | 0.00 |
| ATOM | 1914 | C    | CYS | 124 | 43.974 | 22.336 | 57.429 | 0.00 | 0.00 |
| ATOM | 1915 | O    | CYS | 124 | 44.655 | 22.979 | 58.227 | 0.00 | 0.00 |
| ATOM | 1916 | N    | ARG | 125 | 44.361 | 21.099 | 57.062 | 0.00 | 0.00 |
| ATOM | 1917 | H    | ARG | 125 | 43.780 | 20.602 | 56.403 | 0.00 | 0.00 |
| ATOM | 1918 | CA   | ARG | 125 | 45.603 | 20.495 | 57.593 | 0.00 | 0.00 |
| ATOM | 1919 | HA   | ARG | 125 | 46.329 | 21.195 | 58.006 | 0.00 | 0.00 |
| ATOM | 1920 | CB   | ARG | 125 | 45.116 | 19.416 | 58.658 | 0.00 | 0.00 |
| ATOM | 1921 | HB2  | ARG | 125 | 44.509 | 19.876 | 59.438 | 0.00 | 0.00 |
| ATOM | 1922 | HB3  | ARG | 125 | 44.400 | 18.799 | 58.116 | 0.00 | 0.00 |
| ATOM | 1923 | CG   | ARG | 125 | 46.171 | 18.538 | 59.322 | 0.00 | 0.00 |

|      |      |      |     |     |        |        |        |      |      |
|------|------|------|-----|-----|--------|--------|--------|------|------|
| ATOM | 1924 | HG2  | ARG | 125 | 46.925 | 19.222 | 59.709 | 0.00 | 0.00 |
| ATOM | 1925 | HG3  | ARG | 125 | 46.625 | 17.819 | 58.640 | 0.00 | 0.00 |
| ATOM | 1926 | CD   | ARG | 125 | 45.558 | 17.937 | 60.649 | 0.00 | 0.00 |
| ATOM | 1927 | HD2  | ARG | 125 | 44.637 | 17.510 | 60.253 | 0.00 | 0.00 |
| ATOM | 1928 | HD3  | ARG | 125 | 46.038 | 17.038 | 61.036 | 0.00 | 0.00 |
| ATOM | 1929 | NE   | ARG | 125 | 45.341 | 18.932 | 61.720 | 0.00 | 0.00 |
| ATOM | 1930 | HE   | ARG | 125 | 44.433 | 19.374 | 61.729 | 0.00 | 0.00 |
| ATOM | 1931 | CZ   | ARG | 125 | 46.088 | 19.167 | 62.800 | 0.00 | 0.00 |
| ATOM | 1932 | NH1  | ARG | 125 | 47.295 | 18.696 | 63.055 | 0.00 | 0.00 |
| ATOM | 1933 | 1HH1 | ARG | 125 | 47.872 | 19.112 | 63.772 | 0.00 | 0.00 |
| ATOM | 1934 | 2HH1 | ARG | 125 | 47.666 | 17.930 | 62.511 | 0.00 | 0.00 |
| ATOM | 1935 | NH2  | ARG | 125 | 45.729 | 19.987 | 63.658 | 0.00 | 0.00 |
| ATOM | 1936 | 1HH2 | ARG | 125 | 46.379 | 20.242 | 64.388 | 0.00 | 0.00 |
| ATOM | 1937 | 2HH2 | ARG | 125 | 44.787 | 20.346 | 63.713 | 0.00 | 0.00 |
| ATOM | 1938 | C    | ARG | 125 | 46.353 | 19.768 | 56.403 | 0.00 | 0.00 |
| ATOM | 1939 | O    | ARG | 125 | 45.661 | 19.081 | 55.612 | 0.00 | 0.00 |
| ATOM | 1940 | N    | VAL | 126 | 47.677 | 19.945 | 56.282 | 0.00 | 0.00 |
| ATOM | 1941 | H    | VAL | 126 | 48.124 | 20.433 | 57.045 | 0.00 | 0.00 |
| ATOM | 1942 | CA   | VAL | 126 | 48.472 | 19.371 | 55.212 | 0.00 | 0.00 |
| ATOM | 1943 | HA   | VAL | 126 | 47.986 | 18.461 | 54.859 | 0.00 | 0.00 |
| ATOM | 1944 | CB   | VAL | 126 | 48.596 | 20.345 | 54.038 | 0.00 | 0.00 |
| ATOM | 1945 | HB   | VAL | 126 | 49.261 | 19.753 | 53.410 | 0.00 | 0.00 |
| ATOM | 1946 | CG1  | VAL | 126 | 47.308 | 20.477 | 53.248 | 0.00 | 0.00 |
| ATOM | 1947 | 1HG1 | VAL | 126 | 47.382 | 21.158 | 52.400 | 0.00 | 0.00 |
| ATOM | 1948 | 2HG1 | VAL | 126 | 47.017 | 19.550 | 52.754 | 0.00 | 0.00 |
| ATOM | 1949 | 3HG1 | VAL | 126 | 46.449 | 20.845 | 53.809 | 0.00 | 0.00 |

|      |      |      |     |     |        |        |        |      |      |
|------|------|------|-----|-----|--------|--------|--------|------|------|
| ATOM | 1950 | CG2  | VAL | 126 | 49.159 | 21.724 | 54.356 | 0.00 | 0.00 |
| ATOM | 1951 | 1HG2 | VAL | 126 | 48.548 | 22.326 | 55.030 | 0.00 | 0.00 |
| ATOM | 1952 | 2HG2 | VAL | 126 | 50.054 | 21.527 | 54.947 | 0.00 | 0.00 |
| ATOM | 1953 | 3HG2 | VAL | 126 | 49.264 | 22.304 | 53.439 | 0.00 | 0.00 |
| ATOM | 1954 | C    | VAL | 126 | 49.841 | 18.932 | 55.773 | 0.00 | 0.00 |
| ATOM | 1955 | O    | VAL | 126 | 50.307 | 19.565 | 56.729 | 0.00 | 0.00 |
| ATOM | 1956 | N    | VAL | 127 | 50.378 | 17.906 | 55.118 | 0.00 | 0.00 |
| ATOM | 1957 | H    | VAL | 127 | 50.037 | 17.635 | 54.207 | 0.00 | 0.00 |
| ATOM | 1958 | CA   | VAL | 127 | 51.686 | 17.297 | 55.473 | 0.00 | 0.00 |
| ATOM | 1959 | HA   | VAL | 127 | 51.883 | 17.585 | 56.506 | 0.00 | 0.00 |
| ATOM | 1960 | CB   | VAL | 127 | 51.663 | 15.706 | 55.247 | 0.00 | 0.00 |
| ATOM | 1961 | HB   | VAL | 127 | 51.265 | 15.390 | 54.282 | 0.00 | 0.00 |
| ATOM | 1962 | CG1  | VAL | 127 | 53.054 | 14.944 | 55.391 | 0.00 | 0.00 |
| ATOM | 1963 | 1HG1 | VAL | 127 | 53.751 | 15.106 | 54.569 | 0.00 | 0.00 |
| ATOM | 1964 | 2HG1 | VAL | 127 | 53.454 | 15.276 | 56.350 | 0.00 | 0.00 |
| ATOM | 1965 | 3HG1 | VAL | 127 | 52.715 | 13.910 | 55.452 | 0.00 | 0.00 |
| ATOM | 1966 | CG2  | VAL | 127 | 50.701 | 15.148 | 56.273 | 0.00 | 0.00 |
| ATOM | 1967 | 1HG2 | VAL | 127 | 49.687 | 15.516 | 56.121 | 0.00 | 0.00 |
| ATOM | 1968 | 2HG2 | VAL | 127 | 50.722 | 14.058 | 56.256 | 0.00 | 0.00 |
| ATOM | 1969 | 3HG2 | VAL | 127 | 51.002 | 15.591 | 57.222 | 0.00 | 0.00 |
| ATOM | 1970 | C    | VAL | 127 | 52.710 | 17.992 | 54.491 | 0.00 | 0.00 |
| ATOM | 1971 | O    | VAL | 127 | 52.739 | 17.808 | 53.286 | 0.00 | 0.00 |
| ATOM | 1972 | N    | VAL | 128 | 53.716 | 18.681 | 55.091 | 0.00 | 0.00 |
| ATOM | 1973 | H    | VAL | 128 | 53.812 | 18.666 | 56.096 | 0.00 | 0.00 |
| ATOM | 1974 | CA   | VAL | 128 | 54.783 | 19.304 | 54.379 | 0.00 | 0.00 |
| ATOM | 1975 | HA   | VAL | 128 | 54.558 | 19.553 | 53.342 | 0.00 | 0.00 |

|      |      |      |     |     |        |        |        |      |      |
|------|------|------|-----|-----|--------|--------|--------|------|------|
| ATOM | 1976 | CB   | VAL | 128 | 55.158 | 20.568 | 55.094 | 0.00 | 0.00 |
| ATOM | 1977 | HB   | VAL | 128 | 55.397 | 20.336 | 56.132 | 0.00 | 0.00 |
| ATOM | 1978 | CG1  | VAL | 128 | 56.417 | 21.088 | 54.405 | 0.00 | 0.00 |
| ATOM | 1979 | 1HG1 | VAL | 128 | 56.379 | 22.155 | 54.624 | 0.00 | 0.00 |
| ATOM | 1980 | 2HG1 | VAL | 128 | 57.286 | 20.701 | 54.938 | 0.00 | 0.00 |
| ATOM | 1981 | 3HG1 | VAL | 128 | 56.357 | 20.857 | 53.341 | 0.00 | 0.00 |
| ATOM | 1982 | CG2  | VAL | 128 | 53.938 | 21.568 | 54.835 | 0.00 | 0.00 |
| ATOM | 1983 | 1HG2 | VAL | 128 | 53.106 | 21.135 | 55.391 | 0.00 | 0.00 |
| ATOM | 1984 | 2HG2 | VAL | 128 | 54.242 | 22.513 | 55.285 | 0.00 | 0.00 |
| ATOM | 1985 | 3HG2 | VAL | 128 | 53.666 | 21.598 | 53.780 | 0.00 | 0.00 |
| ATOM | 1986 | C    | VAL | 128 | 56.004 | 18.395 | 54.363 | 0.00 | 0.00 |
| ATOM | 1987 | O    | VAL | 128 | 56.565 | 18.130 | 55.364 | 0.00 | 0.00 |
| ATOM | 1988 | N    | GLU | 129 | 56.597 | 18.088 | 53.260 | 0.00 | 0.00 |
| ATOM | 1989 | H    | GLU | 129 | 56.014 | 18.207 | 52.444 | 0.00 | 0.00 |
| ATOM | 1990 | CA   | GLU | 129 | 57.939 | 17.474 | 53.079 | 0.00 | 0.00 |
| ATOM | 1991 | HA   | GLU | 129 | 58.251 | 17.150 | 54.072 | 0.00 | 0.00 |
| ATOM | 1992 | CB   | GLU | 129 | 57.949 | 16.196 | 52.253 | 0.00 | 0.00 |
| ATOM | 1993 | HB2  | GLU | 129 | 57.073 | 15.588 | 52.478 | 0.00 | 0.00 |
| ATOM | 1994 | HB3  | GLU | 129 | 57.816 | 16.482 | 51.209 | 0.00 | 0.00 |
| ATOM | 1995 | CG   | GLU | 129 | 59.116 | 15.266 | 52.488 | 0.00 | 0.00 |
| ATOM | 1996 | HG2  | GLU | 129 | 60.054 | 15.807 | 52.614 | 0.00 | 0.00 |
| ATOM | 1997 | HG3  | GLU | 129 | 58.952 | 14.619 | 53.350 | 0.00 | 0.00 |
| ATOM | 1998 | CD   | GLU | 129 | 59.266 | 14.299 | 51.355 | 0.00 | 0.00 |
| ATOM | 1999 | OE1  | GLU | 129 | 58.271 | 13.721 | 50.912 | 0.00 | 0.00 |
| ATOM | 2000 | OE2  | GLU | 129 | 60.431 | 13.981 | 51.072 | 0.00 | 0.00 |
| ATOM | 2001 | C    | GLU | 129 | 58.894 | 18.481 | 52.472 | 0.00 | 0.00 |



|      |      |      |     |     |        |        |        |      |      |
|------|------|------|-----|-----|--------|--------|--------|------|------|
| ATOM | 2002 | O    | GLU | 129 | 58.510 | 18.905 | 51.398 | 0.00 | 0.00 |
| ATOM | 2003 | N    | ASN | 130 | 60.110 | 18.825 | 52.964 | 0.00 | 0.00 |
| ATOM | 2004 | H    | ASN | 130 | 60.480 | 18.332 | 53.763 | 0.00 | 0.00 |
| ATOM | 2005 | CA   | ASN | 130 | 61.044 | 19.777 | 52.389 | 0.00 | 0.00 |
| ATOM | 2006 | HA   | ASN | 130 | 60.435 | 20.422 | 51.756 | 0.00 | 0.00 |
| ATOM | 2007 | CB   | ASN | 130 | 61.648 | 20.639 | 53.582 | 0.00 | 0.00 |
| ATOM | 2008 | HB2  | ASN | 130 | 60.817 | 20.915 | 54.232 | 0.00 | 0.00 |
| ATOM | 2009 | HB3  | ASN | 130 | 62.411 | 20.031 | 54.067 | 0.00 | 0.00 |
| ATOM | 2010 | CG   | ASN | 130 | 62.403 | 21.944 | 53.132 | 0.00 | 0.00 |
| ATOM | 2011 | OD1  | ASN | 130 | 62.462 | 22.196 | 51.969 | 0.00 | 0.00 |
| ATOM | 2012 | ND2  | ASN | 130 | 63.058 | 22.710 | 53.992 | 0.00 | 0.00 |
| ATOM | 2013 | 1HD2 | ASN | 130 | 63.632 | 23.465 | 53.646 | 0.00 | 0.00 |
| ATOM | 2014 | 2HD2 | ASN | 130 | 63.024 | 22.544 | 54.988 | 0.00 | 0.00 |
| ATOM | 2015 | C    | ASN | 130 | 62.033 | 19.034 | 51.530 | 0.00 | 0.00 |
| ATOM | 2016 | O    | ASN | 130 | 62.801 | 18.124 | 52.029 | 0.00 | 0.00 |
| ATOM | 2017 | N    | HID | 131 | 62.073 | 19.458 | 50.239 | 0.00 | 0.00 |
| ATOM | 2018 | H    | HID | 131 | 61.454 | 20.217 | 49.991 | 0.00 | 0.00 |
| ATOM | 2019 | CA   | HID | 131 | 62.762 | 18.837 | 49.101 | 0.00 | 0.00 |
| ATOM | 2020 | HA   | HID | 131 | 62.823 | 17.756 | 49.230 | 0.00 | 0.00 |
| ATOM | 2021 | CB   | HID | 131 | 61.998 | 19.294 | 47.829 | 0.00 | 0.00 |
| ATOM | 2022 | HB2  | HID | 131 | 60.946 | 19.020 | 47.905 | 0.00 | 0.00 |
| ATOM | 2023 | HB3  | HID | 131 | 62.191 | 20.366 | 47.787 | 0.00 | 0.00 |
| ATOM | 2024 | CG   | HID | 131 | 62.447 | 18.660 | 46.505 | 0.00 | 0.00 |
| ATOM | 2025 | ND1  | HID | 131 | 63.016 | 19.263 | 45.371 | 0.00 | 0.00 |
| ATOM | 2026 | HD1  | HID | 131 | 63.208 | 20.227 | 45.140 | 0.00 | 0.00 |
| ATOM | 2027 | CE1  | HID | 131 | 63.281 | 18.330 | 44.453 | 0.00 | 0.00 |

|      |      |     |     |     |        |        |        |      |      |
|------|------|-----|-----|-----|--------|--------|--------|------|------|
| ATOM | 2028 | HE1 | HID | 131 | 63.791 | 18.589 | 43.537 | 0.00 | 0.00 |
| ATOM | 2029 | NE2 | HID | 131 | 63.037 | 17.113 | 44.984 | 0.00 | 0.00 |
| ATOM | 2030 | CD2 | HID | 131 | 62.429 | 17.314 | 46.258 | 0.00 | 0.00 |
| ATOM | 2031 | HD2 | HID | 131 | 62.095 | 16.556 | 46.951 | 0.00 | 0.00 |
| ATOM | 2032 | C   | HID | 131 | 64.224 | 19.193 | 49.051 | 0.00 | 0.00 |
| ATOM | 2033 | O   | HID | 131 | 64.963 | 18.409 | 48.617 | 0.00 | 0.00 |
| ATOM | 2034 | N   | GLY | 132 | 64.630 | 20.376 | 49.434 | 0.00 | 0.00 |
| ATOM | 2035 | H   | GLY | 132 | 63.874 | 21.018 | 49.622 | 0.00 | 0.00 |
| ATOM | 2036 | CA  | GLY | 132 | 65.901 | 21.058 | 49.465 | 0.00 | 0.00 |
| ATOM | 2037 | HA2 | GLY | 132 | 66.325 | 20.895 | 48.474 | 0.00 | 0.00 |
| ATOM | 2038 | HA3 | GLY | 132 | 65.699 | 22.125 | 49.566 | 0.00 | 0.00 |
| ATOM | 2039 | C   | GLY | 132 | 66.911 | 20.775 | 50.592 | 0.00 | 0.00 |
| ATOM | 2040 | O   | GLY | 132 | 66.689 | 19.872 | 51.404 | 0.00 | 0.00 |
| ATOM | 2041 | N   | ASP | 133 | 67.920 | 21.616 | 50.665 | 0.00 | 0.00 |
| ATOM | 2042 | H   | ASP | 133 | 68.082 | 22.300 | 49.940 | 0.00 | 0.00 |
| ATOM | 2043 | CA  | ASP | 133 | 69.198 | 21.278 | 51.387 | 0.00 | 0.00 |
| ATOM | 2044 | HA  | ASP | 133 | 69.045 | 20.288 | 51.817 | 0.00 | 0.00 |
| ATOM | 2045 | CB  | ASP | 133 | 70.406 | 21.241 | 50.476 | 0.00 | 0.00 |
| ATOM | 2046 | HB2 | ASP | 133 | 71.296 | 20.854 | 50.973 | 0.00 | 0.00 |
| ATOM | 2047 | HB3 | ASP | 133 | 70.095 | 20.499 | 49.740 | 0.00 | 0.00 |
| ATOM | 2048 | CG  | ASP | 133 | 70.780 | 22.619 | 49.951 | 0.00 | 0.00 |
| ATOM | 2049 | OD1 | ASP | 133 | 69.880 | 23.462 | 49.758 | 0.00 | 0.00 |
| ATOM | 2050 | OD2 | ASP | 133 | 71.959 | 22.938 | 49.700 | 0.00 | 0.00 |
| ATOM | 2051 | C   | ASP | 133 | 69.513 | 22.194 | 52.601 | 0.00 | 0.00 |
| ATOM | 2052 | O   | ASP | 133 | 70.487 | 22.085 | 53.352 | 0.00 | 0.00 |
| ATOM | 2053 | N   | ARG | 134 | 68.658 | 23.189 | 52.830 | 0.00 | 0.00 |

|      |      |      |     |     |        |        |        |      |      |
|------|------|------|-----|-----|--------|--------|--------|------|------|
| ATOM | 2054 | H    | ARG | 134 | 67.889 | 23.118 | 52.178 | 0.00 | 0.00 |
| ATOM | 2055 | CA   | ARG | 134 | 68.775 | 24.305 | 53.779 | 0.00 | 0.00 |
| ATOM | 2056 | HA   | ARG | 134 | 69.445 | 23.970 | 54.571 | 0.00 | 0.00 |
| ATOM | 2057 | CB   | ARG | 134 | 69.391 | 25.495 | 53.040 | 0.00 | 0.00 |
| ATOM | 2058 | HB2  | ARG | 134 | 69.710 | 26.213 | 53.796 | 0.00 | 0.00 |
| ATOM | 2059 | HB3  | ARG | 134 | 70.357 | 25.185 | 52.642 | 0.00 | 0.00 |
| ATOM | 2060 | CG   | ARG | 134 | 68.536 | 26.234 | 51.970 | 0.00 | 0.00 |
| ATOM | 2061 | HG2  | ARG | 134 | 68.073 | 25.464 | 51.352 | 0.00 | 0.00 |
| ATOM | 2062 | HG3  | ARG | 134 | 67.726 | 26.811 | 52.415 | 0.00 | 0.00 |
| ATOM | 2063 | CD   | ARG | 134 | 69.501 | 27.105 | 51.093 | 0.00 | 0.00 |
| ATOM | 2064 | HD2  | ARG | 134 | 68.836 | 27.770 | 50.541 | 0.00 | 0.00 |
| ATOM | 2065 | HD3  | ARG | 134 | 70.048 | 27.707 | 51.818 | 0.00 | 0.00 |
| ATOM | 2066 | NE   | ARG | 134 | 70.263 | 26.225 | 50.161 | 0.00 | 0.00 |
| ATOM | 2067 | HE   | ARG | 134 | 70.143 | 25.229 | 50.276 | 0.00 | 0.00 |
| ATOM | 2068 | CZ   | ARG | 134 | 71.040 | 26.573 | 49.221 | 0.00 | 0.00 |
| ATOM | 2069 | NH1  | ARG | 134 | 71.190 | 27.820 | 48.928 | 0.00 | 0.00 |
| ATOM | 2070 | 1HH1 | ARG | 134 | 71.756 | 28.163 | 48.165 | 0.00 | 0.00 |
| ATOM | 2071 | 2HH1 | ARG | 134 | 70.813 | 28.525 | 49.545 | 0.00 | 0.00 |
| ATOM | 2072 | NH2  | ARG | 134 | 71.653 | 25.722 | 48.441 | 0.00 | 0.00 |
| ATOM | 2073 | 1HH2 | ARG | 134 | 72.183 | 26.053 | 47.648 | 0.00 | 0.00 |
| ATOM | 2074 | 2HH2 | ARG | 134 | 71.546 | 24.721 | 48.513 | 0.00 | 0.00 |
| ATOM | 2075 | C    | ARG | 134 | 67.415 | 24.715 | 54.409 | 0.00 | 0.00 |
| ATOM | 2076 | O    | ARG | 134 | 66.351 | 24.308 | 53.917 | 0.00 | 0.00 |
| ATOM | 2077 | N    | PRO | 135 | 67.362 | 25.401 | 55.547 | 0.00 | 0.00 |
| ATOM | 2078 | CD   | PRO | 135 | 68.484 | 25.894 | 56.334 | 0.00 | 0.00 |
| ATOM | 2079 | HD2  | PRO | 135 | 69.075 | 25.070 | 56.732 | 0.00 | 0.00 |

|      |      |          |     |        |        |        |      |      |
|------|------|----------|-----|--------|--------|--------|------|------|
| ATOM | 2080 | HD3 PRO  | 135 | 69.169 | 26.494 | 55.735 | 0.00 | 0.00 |
| ATOM | 2081 | CG PRO   | 135 | 67.842 | 26.751 | 57.407 | 0.00 | 0.00 |
| ATOM | 2082 | HG2 PRO  | 135 | 68.490 | 26.801 | 58.282 | 0.00 | 0.00 |
| ATOM | 2083 | HG3 PRO  | 135 | 67.666 | 27.743 | 56.991 | 0.00 | 0.00 |
| ATOM | 2084 | CB PRO   | 135 | 66.538 | 26.046 | 57.615 | 0.00 | 0.00 |
| ATOM | 2085 | HB2 PRO  | 135 | 66.622 | 25.213 | 58.313 | 0.00 | 0.00 |
| ATOM | 2086 | HB3 PRO  | 135 | 65.779 | 26.620 | 58.146 | 0.00 | 0.00 |
| ATOM | 2087 | CA PRO   | 135 | 66.129 | 25.651 | 56.244 | 0.00 | 0.00 |
| ATOM | 2088 | HA PRO   | 135 | 65.568 | 24.721 | 56.341 | 0.00 | 0.00 |
| ATOM | 2089 | C PRO    | 135 | 65.236 | 26.732 | 55.695 | 0.00 | 0.00 |
| ATOM | 2090 | O PRO    | 135 | 65.669 | 27.746 | 55.106 | 0.00 | 0.00 |
| ATOM | 2091 | N ILE    | 136 | 63.923 | 26.465 | 55.781 | 0.00 | 0.00 |
| ATOM | 2092 | H ILE    | 136 | 63.663 | 25.628 | 56.283 | 0.00 | 0.00 |
| ATOM | 2093 | CA ILE   | 136 | 62.858 | 27.418 | 55.396 | 0.00 | 0.00 |
| ATOM | 2094 | HA ILE   | 136 | 63.259 | 28.386 | 55.092 | 0.00 | 0.00 |
| ATOM | 2095 | CB ILE   | 136 | 62.050 | 26.844 | 54.252 | 0.00 | 0.00 |
| ATOM | 2096 | HB ILE   | 136 | 61.436 | 25.982 | 54.512 | 0.00 | 0.00 |
| ATOM | 2097 | CG2 ILE  | 136 | 61.005 | 27.903 | 53.924 | 0.00 | 0.00 |
| ATOM | 2098 | 1HG2 ILE | 136 | 60.475 | 27.796 | 52.978 | 0.00 | 0.00 |
| ATOM | 2099 | 2HG2 ILE | 136 | 60.307 | 28.090 | 54.741 | 0.00 | 0.00 |
| ATOM | 2100 | 3HG2 ILE | 136 | 61.500 | 28.854 | 53.730 | 0.00 | 0.00 |
| ATOM | 2101 | CG1 ILE  | 136 | 62.943 | 26.495 | 53.032 | 0.00 | 0.00 |
| ATOM | 2102 | 2HG1 ILE | 136 | 63.227 | 27.379 | 52.460 | 0.00 | 0.00 |
| ATOM | 2103 | 3HG1 ILE | 136 | 63.826 | 25.967 | 53.389 | 0.00 | 0.00 |
| ATOM | 2104 | CD1 ILE  | 136 | 62.110 | 25.567 | 52.135 | 0.00 | 0.00 |
| ATOM | 2105 | 1HD1 ILE | 136 | 61.755 | 24.643 | 52.592 | 0.00 | 0.00 |

|      |      |      |     |     |        |        |        |      |      |
|------|------|------|-----|-----|--------|--------|--------|------|------|
| ATOM | 2106 | 2HD1 | ILE | 136 | 61.257 | 26.090 | 51.702 | 0.00 | 0.00 |
| ATOM | 2107 | 3HD1 | ILE | 136 | 62.594 | 25.243 | 51.213 | 0.00 | 0.00 |
| ATOM | 2108 | C    | ILE | 136 | 62.038 | 27.686 | 56.647 | 0.00 | 0.00 |
| ATOM | 2109 | O    | ILE | 136 | 61.817 | 26.712 | 57.389 | 0.00 | 0.00 |
| ATOM | 2110 | N    | GLN | 137 | 61.618 | 28.981 | 56.778 | 0.00 | 0.00 |
| ATOM | 2111 | H    | GLN | 137 | 61.853 | 29.610 | 56.024 | 0.00 | 0.00 |
| ATOM | 2112 | CA   | GLN | 137 | 60.657 | 29.622 | 57.711 | 0.00 | 0.00 |
| ATOM | 2113 | HA   | GLN | 137 | 60.280 | 28.876 | 58.410 | 0.00 | 0.00 |
| ATOM | 2114 | CB   | GLN | 137 | 61.310 | 30.745 | 58.586 | 0.00 | 0.00 |
| ATOM | 2115 | HB2  | GLN | 137 | 62.326 | 30.505 | 58.900 | 0.00 | 0.00 |
| ATOM | 2116 | HB3  | GLN | 137 | 61.444 | 31.694 | 58.068 | 0.00 | 0.00 |
| ATOM | 2117 | CG   | GLN | 137 | 60.472 | 31.177 | 59.823 | 0.00 | 0.00 |
| ATOM | 2118 | HG2  | GLN | 137 | 59.581 | 31.709 | 59.490 | 0.00 | 0.00 |
| ATOM | 2119 | HG3  | GLN | 137 | 60.207 | 30.276 | 60.377 | 0.00 | 0.00 |
| ATOM | 2120 | CD   | GLN | 137 | 61.246 | 32.037 | 60.812 | 0.00 | 0.00 |
| ATOM | 2121 | OE1  | GLN | 137 | 62.068 | 31.562 | 61.551 | 0.00 | 0.00 |
| ATOM | 2122 | NE2  | GLN | 137 | 61.182 | 33.338 | 60.728 | 0.00 | 0.00 |
| ATOM | 2123 | 1HE2 | GLN | 137 | 61.852 | 33.949 | 61.172 | 0.00 | 0.00 |
| ATOM | 2124 | 2HE2 | GLN | 137 | 60.548 | 33.825 | 60.111 | 0.00 | 0.00 |
| ATOM | 2125 | C    | GLN | 137 | 59.453 | 30.192 | 57.024 | 0.00 | 0.00 |
| ATOM | 2126 | O    | GLN | 137 | 59.631 | 30.787 | 55.974 | 0.00 | 0.00 |
| ATOM | 2127 | N    | VAL | 138 | 58.249 | 30.098 | 57.605 | 0.00 | 0.00 |
| ATOM | 2128 | H    | VAL | 138 | 58.152 | 29.513 | 58.423 | 0.00 | 0.00 |
| ATOM | 2129 | CA   | VAL | 138 | 56.985 | 30.738 | 57.081 | 0.00 | 0.00 |
| ATOM | 2130 | HA   | VAL | 138 | 57.405 | 31.477 | 56.399 | 0.00 | 0.00 |
| ATOM | 2131 | CB   | VAL | 138 | 56.065 | 29.742 | 56.460 | 0.00 | 0.00 |

|      |      |      |     |     |        |        |        |      |      |
|------|------|------|-----|-----|--------|--------|--------|------|------|
| ATOM | 2132 | HB   | VAL | 138 | 55.730 | 29.067 | 57.248 | 0.00 | 0.00 |
| ATOM | 2133 | CG1  | VAL | 138 | 54.777 | 30.398 | 55.925 | 0.00 | 0.00 |
| ATOM | 2134 | 1HG1 | VAL | 138 | 55.051 | 31.147 | 55.182 | 0.00 | 0.00 |
| ATOM | 2135 | 2HG1 | VAL | 138 | 53.984 | 29.788 | 55.491 | 0.00 | 0.00 |
| ATOM | 2136 | 3HG1 | VAL | 138 | 54.261 | 30.975 | 56.692 | 0.00 | 0.00 |
| ATOM | 2137 | CG2  | VAL | 138 | 56.744 | 29.022 | 55.238 | 0.00 | 0.00 |
| ATOM | 2138 | 1HG2 | VAL | 138 | 57.568 | 28.398 | 55.584 | 0.00 | 0.00 |
| ATOM | 2139 | 2HG2 | VAL | 138 | 55.971 | 28.389 | 54.802 | 0.00 | 0.00 |
| ATOM | 2140 | 3HG2 | VAL | 138 | 57.045 | 29.739 | 54.475 | 0.00 | 0.00 |
| ATOM | 2141 | C    | VAL | 138 | 56.223 | 31.372 | 58.256 | 0.00 | 0.00 |
| ATOM | 2142 | O    | VAL | 138 | 55.942 | 30.730 | 59.318 | 0.00 | 0.00 |
| ATOM | 2143 | N    | GLY | 139 | 55.750 | 32.588 | 58.092 | 0.00 | 0.00 |
| ATOM | 2144 | H    | GLY | 139 | 55.758 | 33.002 | 57.171 | 0.00 | 0.00 |
| ATOM | 2145 | CA   | GLY | 139 | 55.102 | 33.326 | 59.148 | 0.00 | 0.00 |
| ATOM | 2146 | HA2  | GLY | 139 | 55.549 | 32.974 | 60.078 | 0.00 | 0.00 |
| ATOM | 2147 | HA3  | GLY | 139 | 55.276 | 34.392 | 59.000 | 0.00 | 0.00 |
| ATOM | 2148 | C    | GLY | 139 | 53.611 | 33.002 | 59.242 | 0.00 | 0.00 |
| ATOM | 2149 | O    | GLY | 139 | 53.017 | 32.394 | 58.380 | 0.00 | 0.00 |
| ATOM | 2150 | N    | SER | 140 | 52.882 | 33.430 | 60.298 | 0.00 | 0.00 |
| ATOM | 2151 | H    | SER | 140 | 53.399 | 33.919 | 61.015 | 0.00 | 0.00 |
| ATOM | 2152 | CA   | SER | 140 | 51.419 | 33.186 | 60.519 | 0.00 | 0.00 |
| ATOM | 2153 | HA   | SER | 140 | 51.209 | 32.134 | 60.324 | 0.00 | 0.00 |
| ATOM | 2154 | CB   | SER | 140 | 51.144 | 33.421 | 62.035 | 0.00 | 0.00 |
| ATOM | 2155 | HB2  | SER | 140 | 50.239 | 32.838 | 62.208 | 0.00 | 0.00 |
| ATOM | 2156 | HB3  | SER | 140 | 51.966 | 33.039 | 62.640 | 0.00 | 0.00 |
| ATOM | 2157 | OG   | SER | 140 | 50.966 | 34.822 | 62.405 | 0.00 | 0.00 |

|      |      |     |     |     |        |        |        |      |      |
|------|------|-----|-----|-----|--------|--------|--------|------|------|
| ATOM | 2158 | HG  | SER | 140 | 50.285 | 35.254 | 61.884 | 0.00 | 0.00 |
| ATOM | 2159 | C   | SER | 140 | 50.442 | 33.853 | 59.587 | 0.00 | 0.00 |
| ATOM | 2160 | O   | SER | 140 | 49.282 | 33.404 | 59.592 | 0.00 | 0.00 |
| ATOM | 2161 | N   | HIE | 141 | 50.833 | 34.906 | 58.855 | 0.00 | 0.00 |
| ATOM | 2162 | H   | HIE | 141 | 51.648 | 35.390 | 59.204 | 0.00 | 0.00 |
| ATOM | 2163 | CA  | HIE | 141 | 49.896 | 35.620 | 58.046 | 0.00 | 0.00 |
| ATOM | 2164 | HA  | HIE | 141 | 48.897 | 35.184 | 58.038 | 0.00 | 0.00 |
| ATOM | 2165 | CB  | HIE | 141 | 49.809 | 37.022 | 58.611 | 0.00 | 0.00 |
| ATOM | 2166 | HB2 | HIE | 141 | 50.802 | 37.410 | 58.839 | 0.00 | 0.00 |
| ATOM | 2167 | HB3 | HIE | 141 | 49.351 | 37.605 | 57.812 | 0.00 | 0.00 |
| ATOM | 2168 | CG  | HIE | 141 | 48.912 | 37.066 | 59.799 | 0.00 | 0.00 |
| ATOM | 2169 | ND1 | HIE | 141 | 49.084 | 36.544 | 61.061 | 0.00 | 0.00 |
| ATOM | 2170 | CE1 | HIE | 141 | 47.869 | 36.624 | 61.698 | 0.00 | 0.00 |
| ATOM | 2171 | HE1 | HIE | 141 | 47.591 | 36.292 | 62.687 | 0.00 | 0.00 |
| ATOM | 2172 | NE2 | HIE | 141 | 46.968 | 37.185 | 60.884 | 0.00 | 0.00 |
| ATOM | 2173 | HE2 | HIE | 141 | 45.970 | 37.269 | 61.016 | 0.00 | 0.00 |
| ATOM | 2174 | CD2 | HIE | 141 | 47.554 | 37.459 | 59.637 | 0.00 | 0.00 |
| ATOM | 2175 | HD2 | HIE | 141 | 47.079 | 37.778 | 58.721 | 0.00 | 0.00 |
| ATOM | 2176 | C   | HIE | 141 | 50.208 | 35.561 | 56.534 | 0.00 | 0.00 |
| ATOM | 2177 | O   | HIE | 141 | 49.446 | 36.176 | 55.778 | 0.00 | 0.00 |
| ATOM | 2178 | N   | TYR | 142 | 51.269 | 34.952 | 56.040 | 0.00 | 0.00 |
| ATOM | 2179 | H   | TYR | 142 | 51.870 | 34.476 | 56.697 | 0.00 | 0.00 |
| ATOM | 2180 | CA  | TYR | 142 | 51.507 | 34.707 | 54.625 | 0.00 | 0.00 |
| ATOM | 2181 | HA  | TYR | 142 | 51.296 | 35.631 | 54.087 | 0.00 | 0.00 |
| ATOM | 2182 | CB  | TYR | 142 | 53.025 | 34.557 | 54.402 | 0.00 | 0.00 |
| ATOM | 2183 | HB2 | TYR | 142 | 53.402 | 35.487 | 54.828 | 0.00 | 0.00 |

|      |      |     |     |     |        |        |        |      |      |
|------|------|-----|-----|-----|--------|--------|--------|------|------|
| ATOM | 2184 | HB3 | TYR | 142 | 53.367 | 33.675 | 54.943 | 0.00 | 0.00 |
| ATOM | 2185 | CG  | TYR | 142 | 53.376 | 34.484 | 52.957 | 0.00 | 0.00 |
| ATOM | 2186 | CD1 | TYR | 142 | 53.709 | 35.631 | 52.287 | 0.00 | 0.00 |
| ATOM | 2187 | HD1 | TYR | 142 | 53.616 | 36.540 | 52.864 | 0.00 | 0.00 |
| ATOM | 2188 | CE1 | TYR | 142 | 54.151 | 35.640 | 50.922 | 0.00 | 0.00 |
| ATOM | 2189 | HE1 | TYR | 142 | 54.418 | 36.570 | 50.443 | 0.00 | 0.00 |
| ATOM | 2190 | CZ  | TYR | 142 | 54.152 | 34.401 | 50.251 | 0.00 | 0.00 |
| ATOM | 2191 | OH  | TYR | 142 | 54.276 | 34.494 | 48.857 | 0.00 | 0.00 |
| ATOM | 2192 | HH  | TYR | 142 | 54.095 | 35.428 | 48.729 | 0.00 | 0.00 |
| ATOM | 2193 | CE2 | TYR | 142 | 53.863 | 33.222 | 50.899 | 0.00 | 0.00 |
| ATOM | 2194 | HE2 | TYR | 142 | 53.664 | 32.360 | 50.278 | 0.00 | 0.00 |
| ATOM | 2195 | CD2 | TYR | 142 | 53.366 | 33.239 | 52.210 | 0.00 | 0.00 |
| ATOM | 2196 | HD2 | TYR | 142 | 52.950 | 32.289 | 52.514 | 0.00 | 0.00 |
| ATOM | 2197 | C   | TYR | 142 | 50.535 | 33.622 | 54.101 | 0.00 | 0.00 |
| ATOM | 2198 | O   | TYR | 142 | 50.140 | 32.702 | 54.802 | 0.00 | 0.00 |
| ATOM | 2199 | N   | HID | 143 | 50.129 | 33.796 | 52.862 | 0.00 | 0.00 |
| ATOM | 2200 | H   | HID | 143 | 50.486 | 34.615 | 52.390 | 0.00 | 0.00 |
| ATOM | 2201 | CA  | HID | 143 | 49.325 | 32.821 | 52.147 | 0.00 | 0.00 |
| ATOM | 2202 | HA  | HID | 143 | 48.485 | 32.631 | 52.816 | 0.00 | 0.00 |
| ATOM | 2203 | CB  | HID | 143 | 48.729 | 33.454 | 50.875 | 0.00 | 0.00 |
| ATOM | 2204 | HB2 | HID | 143 | 48.380 | 34.398 | 51.293 | 0.00 | 0.00 |
| ATOM | 2205 | HB3 | HID | 143 | 49.546 | 33.612 | 50.171 | 0.00 | 0.00 |
| ATOM | 2206 | CG  | HID | 143 | 47.587 | 32.781 | 50.109 | 0.00 | 0.00 |
| ATOM | 2207 | ND1 | HID | 143 | 46.963 | 33.377 | 49.001 | 0.00 | 0.00 |
| ATOM | 2208 | HD1 | HID | 143 | 47.112 | 34.316 | 48.660 | 0.00 | 0.00 |
| ATOM | 2209 | CE1 | HID | 143 | 46.102 | 32.482 | 48.564 | 0.00 | 0.00 |



|      |      |     |     |     |        |        |        |      |      |
|------|------|-----|-----|-----|--------|--------|--------|------|------|
| ATOM | 2210 | HE1 | HID | 143 | 45.538 | 32.678 | 47.664 | 0.00 | 0.00 |
| ATOM | 2211 | NE2 | HID | 143 | 45.980 | 31.399 | 49.329 | 0.00 | 0.00 |
| ATOM | 2212 | CD2 | HID | 143 | 46.983 | 31.571 | 50.267 | 0.00 | 0.00 |
| ATOM | 2213 | HD2 | HID | 143 | 47.172 | 30.890 | 51.084 | 0.00 | 0.00 |
| ATOM | 2214 | C   | HID | 143 | 50.063 | 31.506 | 51.944 | 0.00 | 0.00 |
| ATOM | 2215 | O   | HID | 143 | 51.070 | 31.494 | 51.236 | 0.00 | 0.00 |
| ATOM | 2216 | N   | PHE | 144 | 49.624 | 30.414 | 52.618 | 0.00 | 0.00 |
| ATOM | 2217 | H   | PHE | 144 | 48.806 | 30.436 | 53.210 | 0.00 | 0.00 |
| ATOM | 2218 | CA  | PHE | 144 | 50.402 | 29.213 | 52.624 | 0.00 | 0.00 |
| ATOM | 2219 | HA  | PHE | 144 | 51.321 | 29.579 | 53.081 | 0.00 | 0.00 |
| ATOM | 2220 | CB  | PHE | 144 | 49.796 | 28.247 | 53.565 | 0.00 | 0.00 |
| ATOM | 2221 | HB2 | PHE | 144 | 48.978 | 27.757 | 53.037 | 0.00 | 0.00 |
| ATOM | 2222 | HB3 | PHE | 144 | 49.359 | 28.807 | 54.392 | 0.00 | 0.00 |
| ATOM | 2223 | CG  | PHE | 144 | 50.861 | 27.368 | 54.194 | 0.00 | 0.00 |
| ATOM | 2224 | CD1 | PHE | 144 | 51.883 | 27.848 | 54.976 | 0.00 | 0.00 |
| ATOM | 2225 | HD1 | PHE | 144 | 51.803 | 28.854 | 55.359 | 0.00 | 0.00 |
| ATOM | 2226 | CE1 | PHE | 144 | 52.995 | 27.079 | 55.363 | 0.00 | 0.00 |
| ATOM | 2227 | HE1 | PHE | 144 | 53.762 | 27.537 | 55.970 | 0.00 | 0.00 |
| ATOM | 2228 | CZ  | PHE | 144 | 53.027 | 25.731 | 55.009 | 0.00 | 0.00 |
| ATOM | 2229 | HZ  | PHE | 144 | 53.801 | 25.105 | 55.427 | 0.00 | 0.00 |
| ATOM | 2230 | CE2 | PHE | 144 | 52.005 | 25.206 | 54.291 | 0.00 | 0.00 |
| ATOM | 2231 | HE2 | PHE | 144 | 52.104 | 24.218 | 53.868 | 0.00 | 0.00 |
| ATOM | 2232 | CD2 | PHE | 144 | 50.986 | 26.005 | 53.701 | 0.00 | 0.00 |
| ATOM | 2233 | HD2 | PHE | 144 | 50.405 | 25.680 | 52.850 | 0.00 | 0.00 |
| ATOM | 2234 | C   | PHE | 144 | 50.587 | 28.492 | 51.290 | 0.00 | 0.00 |
| ATOM | 2235 | O   | PHE | 144 | 51.584 | 27.882 | 50.986 | 0.00 | 0.00 |

|      |      |     |     |     |        |        |        |      |      |
|------|------|-----|-----|-----|--------|--------|--------|------|------|
| ATOM | 2236 | N   | ALA | 145 | 49.572 | 28.494 | 50.405 | 0.00 | 0.00 |
| ATOM | 2237 | H   | ALA | 145 | 48.725 | 28.985 | 50.656 | 0.00 | 0.00 |
| ATOM | 2238 | CA  | ALA | 145 | 49.779 | 27.962 | 49.050 | 0.00 | 0.00 |
| ATOM | 2239 | HA  | ALA | 145 | 50.103 | 26.925 | 49.141 | 0.00 | 0.00 |
| ATOM | 2240 | CB  | ALA | 145 | 48.433 | 27.815 | 48.227 | 0.00 | 0.00 |
| ATOM | 2241 | HB1 | ALA | 145 | 47.945 | 28.781 | 48.094 | 0.00 | 0.00 |
| ATOM | 2242 | HB2 | ALA | 145 | 48.804 | 27.417 | 47.283 | 0.00 | 0.00 |
| ATOM | 2243 | HB3 | ALA | 145 | 47.828 | 27.097 | 48.781 | 0.00 | 0.00 |
| ATOM | 2244 | C   | ALA | 145 | 50.803 | 28.685 | 48.143 | 0.00 | 0.00 |
| ATOM | 2245 | O   | ALA | 145 | 51.166 | 28.192 | 47.106 | 0.00 | 0.00 |
| ATOM | 2246 | N   | GLU | 146 | 51.345 | 29.761 | 48.662 | 0.00 | 0.00 |
| ATOM | 2247 | H   | GLU | 146 | 50.971 | 30.022 | 49.563 | 0.00 | 0.00 |
| ATOM | 2248 | CA  | GLU | 146 | 52.133 | 30.710 | 47.917 | 0.00 | 0.00 |
| ATOM | 2249 | HA  | GLU | 146 | 52.055 | 30.526 | 46.845 | 0.00 | 0.00 |
| ATOM | 2250 | CB  | GLU | 146 | 51.663 | 32.148 | 48.155 | 0.00 | 0.00 |
| ATOM | 2251 | HB2 | GLU | 146 | 50.585 | 32.119 | 48.314 | 0.00 | 0.00 |
| ATOM | 2252 | HB3 | GLU | 146 | 52.031 | 32.462 | 49.132 | 0.00 | 0.00 |
| ATOM | 2253 | CG  | GLU | 146 | 51.990 | 33.154 | 47.070 | 0.00 | 0.00 |
| ATOM | 2254 | HG2 | GLU | 146 | 51.981 | 34.147 | 47.519 | 0.00 | 0.00 |
| ATOM | 2255 | HG3 | GLU | 146 | 52.961 | 32.899 | 46.645 | 0.00 | 0.00 |
| ATOM | 2256 | CD  | GLU | 146 | 51.014 | 33.236 | 45.791 | 0.00 | 0.00 |
| ATOM | 2257 | OE1 | GLU | 146 | 50.316 | 34.286 | 45.631 | 0.00 | 0.00 |
| ATOM | 2258 | OE2 | GLU | 146 | 50.716 | 32.176 | 45.175 | 0.00 | 0.00 |
| ATOM | 2259 | C   | GLU | 146 | 53.666 | 30.657 | 48.280 | 0.00 | 0.00 |
| ATOM | 2260 | O   | GLU | 146 | 54.477 | 31.148 | 47.564 | 0.00 | 0.00 |
| ATOM | 2261 | N   | VAL | 147 | 54.040 | 29.904 | 49.332 | 0.00 | 0.00 |

|      |      |      |     |     |        |        |        |      |      |
|------|------|------|-----|-----|--------|--------|--------|------|------|
| ATOM | 2262 | H    | VAL | 147 | 53.264 | 29.427 | 49.769 | 0.00 | 0.00 |
| ATOM | 2263 | CA   | VAL | 147 | 55.446 | 29.783 | 49.859 | 0.00 | 0.00 |
| ATOM | 2264 | HA   | VAL | 147 | 55.823 | 30.805 | 49.831 | 0.00 | 0.00 |
| ATOM | 2265 | CB   | VAL | 147 | 55.386 | 29.225 | 51.259 | 0.00 | 0.00 |
| ATOM | 2266 | HB   | VAL | 147 | 56.382 | 29.261 | 51.699 | 0.00 | 0.00 |
| ATOM | 2267 | CG1  | VAL | 147 | 54.533 | 29.940 | 52.272 | 0.00 | 0.00 |
| ATOM | 2268 | 1HG1 | VAL | 147 | 54.298 | 29.248 | 53.081 | 0.00 | 0.00 |
| ATOM | 2269 | 2HG1 | VAL | 147 | 55.164 | 30.689 | 52.750 | 0.00 | 0.00 |
| ATOM | 2270 | 3HG1 | VAL | 147 | 53.561 | 30.238 | 51.880 | 0.00 | 0.00 |
| ATOM | 2271 | CG2  | VAL | 147 | 55.028 | 27.724 | 51.315 | 0.00 | 0.00 |
| ATOM | 2272 | 1HG2 | VAL | 147 | 55.043 | 27.398 | 52.355 | 0.00 | 0.00 |
| ATOM | 2273 | 2HG2 | VAL | 147 | 53.996 | 27.514 | 51.035 | 0.00 | 0.00 |
| ATOM | 2274 | 3HG2 | VAL | 147 | 55.614 | 27.124 | 50.619 | 0.00 | 0.00 |
| ATOM | 2275 | C    | VAL | 147 | 56.383 | 29.000 | 48.900 | 0.00 | 0.00 |
| ATOM | 2276 | O    | VAL | 147 | 56.001 | 28.267 | 47.988 | 0.00 | 0.00 |
| ATOM | 2277 | N    | ASN | 148 | 57.684 | 29.175 | 49.082 | 0.00 | 0.00 |
| ATOM | 2278 | H    | ASN | 148 | 57.970 | 29.825 | 49.801 | 0.00 | 0.00 |
| ATOM | 2279 | CA   | ASN | 148 | 58.760 | 28.416 | 48.411 | 0.00 | 0.00 |
| ATOM | 2280 | HA   | ASN | 148 | 59.083 | 29.066 | 47.598 | 0.00 | 0.00 |
| ATOM | 2281 | CB   | ASN | 148 | 59.889 | 28.401 | 49.418 | 0.00 | 0.00 |
| ATOM | 2282 | HB2  | ASN | 148 | 60.122 | 29.382 | 49.833 | 0.00 | 0.00 |
| ATOM | 2283 | HB3  | ASN | 148 | 59.718 | 27.724 | 50.255 | 0.00 | 0.00 |
| ATOM | 2284 | CG   | ASN | 148 | 61.150 | 27.997 | 48.693 | 0.00 | 0.00 |
| ATOM | 2285 | OD1  | ASN | 148 | 61.215 | 27.275 | 47.734 | 0.00 | 0.00 |
| ATOM | 2286 | ND2  | ASN | 148 | 62.234 | 28.479 | 49.197 | 0.00 | 0.00 |
| ATOM | 2287 | 1HD2 | ASN | 148 | 63.069 | 28.373 | 48.638 | 0.00 | 0.00 |

|      |      |      |     |     |        |        |        |      |      |
|------|------|------|-----|-----|--------|--------|--------|------|------|
| ATOM | 2288 | 2HD2 | ASN | 148 | 62.101 | 28.876 | 50.116 | 0.00 | 0.00 |
| ATOM | 2289 | C    | ASN | 148 | 58.423 | 26.959 | 47.863 | 0.00 | 0.00 |
| ATOM | 2290 | O    | ASN | 148 | 58.019 | 26.042 | 48.583 | 0.00 | 0.00 |
| ATOM | 2291 | N    | PRO | 149 | 58.597 | 26.750 | 46.480 | 0.00 | 0.00 |
| ATOM | 2292 | CD   | PRO | 149 | 58.873 | 27.720 | 45.507 | 0.00 | 0.00 |
| ATOM | 2293 | HD2  | PRO | 149 | 58.253 | 28.592 | 45.712 | 0.00 | 0.00 |
| ATOM | 2294 | HD3  | PRO | 149 | 59.941 | 27.938 | 45.518 | 0.00 | 0.00 |
| ATOM | 2295 | CG   | PRO | 149 | 58.316 | 27.099 | 44.269 | 0.00 | 0.00 |
| ATOM | 2296 | HG2  | PRO | 149 | 57.245 | 27.272 | 44.158 | 0.00 | 0.00 |
| ATOM | 2297 | HG3  | PRO | 149 | 58.828 | 27.647 | 43.478 | 0.00 | 0.00 |
| ATOM | 2298 | CB   | PRO | 149 | 58.712 | 25.630 | 44.409 | 0.00 | 0.00 |
| ATOM | 2299 | HB2  | PRO | 149 | 58.174 | 25.020 | 43.683 | 0.00 | 0.00 |
| ATOM | 2300 | HB3  | PRO | 149 | 59.774 | 25.425 | 44.273 | 0.00 | 0.00 |
| ATOM | 2301 | CA   | PRO | 149 | 58.225 | 25.480 | 45.849 | 0.00 | 0.00 |
| ATOM | 2302 | HA   | PRO | 149 | 57.135 | 25.446 | 45.846 | 0.00 | 0.00 |
| ATOM | 2303 | C    | PRO | 149 | 58.996 | 24.262 | 46.452 | 0.00 | 0.00 |
| ATOM | 2304 | O    | PRO | 149 | 58.579 | 23.146 | 46.133 | 0.00 | 0.00 |
| ATOM | 2305 | N    | ALA | 150 | 60.131 | 24.452 | 47.151 | 0.00 | 0.00 |
| ATOM | 2306 | H    | ALA | 150 | 60.549 | 25.364 | 47.037 | 0.00 | 0.00 |
| ATOM | 2307 | CA   | ALA | 150 | 60.916 | 23.425 | 47.832 | 0.00 | 0.00 |
| ATOM | 2308 | HA   | ALA | 150 | 61.151 | 22.612 | 47.145 | 0.00 | 0.00 |
| ATOM | 2309 | CB   | ALA | 150 | 62.320 | 23.935 | 48.255 | 0.00 | 0.00 |
| ATOM | 2310 | HB1  | ALA | 150 | 62.908 | 24.285 | 47.407 | 0.00 | 0.00 |
| ATOM | 2311 | HB2  | ALA | 150 | 62.173 | 24.746 | 48.969 | 0.00 | 0.00 |
| ATOM | 2312 | HB3  | ALA | 150 | 62.825 | 23.138 | 48.799 | 0.00 | 0.00 |
| ATOM | 2313 | C    | ALA | 150 | 60.181 | 22.766 | 49.067 | 0.00 | 0.00 |

|      |      |      |     |     |        |        |        |      |      |
|------|------|------|-----|-----|--------|--------|--------|------|------|
| ATOM | 2314 | O    | ALA | 150 | 60.547 | 21.622 | 49.334 | 0.00 | 0.00 |
| ATOM | 2315 | N    | LEU | 151 | 59.202 | 23.420 | 49.699 | 0.00 | 0.00 |
| ATOM | 2316 | H    | LEU | 151 | 58.980 | 24.320 | 49.297 | 0.00 | 0.00 |
| ATOM | 2317 | CA   | LEU | 151 | 58.176 | 22.787 | 50.493 | 0.00 | 0.00 |
| ATOM | 2318 | HA   | LEU | 151 | 58.690 | 22.063 | 51.125 | 0.00 | 0.00 |
| ATOM | 2319 | CB   | LEU | 151 | 57.522 | 23.791 | 51.465 | 0.00 | 0.00 |
| ATOM | 2320 | HB2  | LEU | 151 | 57.055 | 24.607 | 50.914 | 0.00 | 0.00 |
| ATOM | 2321 | HB3  | LEU | 151 | 56.775 | 23.274 | 52.068 | 0.00 | 0.00 |
| ATOM | 2322 | CG   | LEU | 151 | 58.440 | 24.444 | 52.460 | 0.00 | 0.00 |
| ATOM | 2323 | HG   | LEU | 151 | 59.087 | 25.120 | 51.901 | 0.00 | 0.00 |
| ATOM | 2324 | CD1  | LEU | 151 | 57.582 | 25.232 | 53.425 | 0.00 | 0.00 |
| ATOM | 2325 | 1HD1 | LEU | 151 | 56.892 | 25.879 | 52.884 | 0.00 | 0.00 |
| ATOM | 2326 | 2HD1 | LEU | 151 | 57.008 | 24.669 | 54.160 | 0.00 | 0.00 |
| ATOM | 2327 | 3HD1 | LEU | 151 | 58.219 | 25.784 | 54.116 | 0.00 | 0.00 |
| ATOM | 2328 | CD2  | LEU | 151 | 59.361 | 23.469 | 53.195 | 0.00 | 0.00 |
| ATOM | 2329 | 1HD2 | LEU | 151 | 58.711 | 22.861 | 53.823 | 0.00 | 0.00 |
| ATOM | 2330 | 2HD2 | LEU | 151 | 59.926 | 22.838 | 52.509 | 0.00 | 0.00 |
| ATOM | 2331 | 3HD2 | LEU | 151 | 60.051 | 24.054 | 53.804 | 0.00 | 0.00 |
| ATOM | 2332 | C    | LEU | 151 | 57.171 | 22.133 | 49.511 | 0.00 | 0.00 |
| ATOM | 2333 | O    | LEU | 151 | 56.554 | 22.719 | 48.629 | 0.00 | 0.00 |
| ATOM | 2334 | N    | LYS | 152 | 57.031 | 20.840 | 49.752 | 0.00 | 0.00 |
| ATOM | 2335 | H    | LYS | 152 | 57.607 | 20.289 | 50.371 | 0.00 | 0.00 |
| ATOM | 2336 | CA   | LYS | 152 | 56.069 | 19.974 | 49.071 | 0.00 | 0.00 |
| ATOM | 2337 | HA   | LYS | 152 | 55.583 | 20.509 | 48.255 | 0.00 | 0.00 |
| ATOM | 2338 | CB   | LYS | 152 | 56.764 | 18.839 | 48.311 | 0.00 | 0.00 |
| ATOM | 2339 | HB2  | LYS | 152 | 57.329 | 18.297 | 49.069 | 0.00 | 0.00 |

|      |      |     |     |     |        |        |        |      |      |
|------|------|-----|-----|-----|--------|--------|--------|------|------|
| ATOM | 2340 | HB3 | LYS | 152 | 55.927 | 18.271 | 47.904 | 0.00 | 0.00 |
| ATOM | 2341 | CG  | LYS | 152 | 57.707 | 19.340 | 47.213 | 0.00 | 0.00 |
| ATOM | 2342 | HG2 | LYS | 152 | 57.147 | 20.040 | 46.593 | 0.00 | 0.00 |
| ATOM | 2343 | HG3 | LYS | 152 | 58.453 | 19.908 | 47.770 | 0.00 | 0.00 |
| ATOM | 2344 | CD  | LYS | 152 | 58.262 | 18.117 | 46.477 | 0.00 | 0.00 |
| ATOM | 2345 | HD2 | LYS | 152 | 58.876 | 17.431 | 47.061 | 0.00 | 0.00 |
| ATOM | 2346 | HD3 | LYS | 152 | 57.447 | 17.506 | 46.086 | 0.00 | 0.00 |
| ATOM | 2347 | CE  | LYS | 152 | 59.094 | 18.613 | 45.222 | 0.00 | 0.00 |
| ATOM | 2348 | HE2 | LYS | 152 | 59.661 | 19.473 | 45.577 | 0.00 | 0.00 |
| ATOM | 2349 | HE3 | LYS | 152 | 59.750 | 17.789 | 44.942 | 0.00 | 0.00 |
| ATOM | 2350 | NZ  | LYS | 152 | 58.317 | 18.975 | 44.022 | 0.00 | 0.00 |
| ATOM | 2351 | HZ1 | LYS | 152 | 58.203 | 19.978 | 44.015 | 0.00 | 0.00 |
| ATOM | 2352 | HZ2 | LYS | 152 | 58.865 | 18.770 | 43.198 | 0.00 | 0.00 |
| ATOM | 2353 | HZ3 | LYS | 152 | 57.481 | 18.408 | 44.004 | 0.00 | 0.00 |
| ATOM | 2354 | C   | LYS | 152 | 54.931 | 19.546 | 49.939 | 0.00 | 0.00 |
| ATOM | 2355 | O   | LYS | 152 | 55.084 | 18.741 | 50.911 | 0.00 | 0.00 |
| ATOM | 2356 | N   | PHE | 153 | 53.674 | 19.894 | 49.551 | 0.00 | 0.00 |
| ATOM | 2357 | H   | PHE | 153 | 53.664 | 20.524 | 48.762 | 0.00 | 0.00 |
| ATOM | 2358 | CA  | PHE | 153 | 52.436 | 19.683 | 50.245 | 0.00 | 0.00 |
| ATOM | 2359 | HA  | PHE | 153 | 52.475 | 18.613 | 50.448 | 0.00 | 0.00 |
| ATOM | 2360 | CB  | PHE | 153 | 52.359 | 20.552 | 51.555 | 0.00 | 0.00 |
| ATOM | 2361 | HB2 | PHE | 153 | 51.373 | 20.387 | 51.989 | 0.00 | 0.00 |
| ATOM | 2362 | HB3 | PHE | 153 | 53.118 | 20.184 | 52.244 | 0.00 | 0.00 |
| ATOM | 2363 | CG  | PHE | 153 | 52.387 | 22.044 | 51.312 | 0.00 | 0.00 |
| ATOM | 2364 | CD1 | PHE | 153 | 51.171 | 22.763 | 51.037 | 0.00 | 0.00 |
| ATOM | 2365 | HD1 | PHE | 153 | 50.238 | 22.271 | 51.269 | 0.00 | 0.00 |

|      |      |     |     |     |        |        |        |      |      |
|------|------|-----|-----|-----|--------|--------|--------|------|------|
| ATOM | 2366 | CE1 | PHE | 153 | 51.184 | 24.140 | 50.712 | 0.00 | 0.00 |
| ATOM | 2367 | HE1 | PHE | 153 | 50.264 | 24.704 | 50.662 | 0.00 | 0.00 |
| ATOM | 2368 | CZ  | PHE | 153 | 52.454 | 24.749 | 50.642 | 0.00 | 0.00 |
| ATOM | 2369 | HZ  | PHE | 153 | 52.591 | 25.815 | 50.532 | 0.00 | 0.00 |
| ATOM | 2370 | CE2 | PHE | 153 | 53.688 | 24.049 | 50.895 | 0.00 | 0.00 |
| ATOM | 2371 | HE2 | PHE | 153 | 54.640 | 24.556 | 50.834 | 0.00 | 0.00 |
| ATOM | 2372 | CD2 | PHE | 153 | 53.603 | 22.715 | 51.211 | 0.00 | 0.00 |
| ATOM | 2373 | HD2 | PHE | 153 | 54.483 | 22.176 | 51.533 | 0.00 | 0.00 |
| ATOM | 2374 | C   | PHE | 153 | 51.247 | 19.921 | 49.386 | 0.00 | 0.00 |
| ATOM | 2375 | O   | PHE | 153 | 51.375 | 20.379 | 48.276 | 0.00 | 0.00 |
| ATOM | 2376 | N   | ASP | 154 | 50.024 | 19.729 | 49.863 | 0.00 | 0.00 |
| ATOM | 2377 | H   | ASP | 154 | 49.926 | 19.466 | 50.833 | 0.00 | 0.00 |
| ATOM | 2378 | CA  | ASP | 154 | 48.832 | 19.904 | 49.002 | 0.00 | 0.00 |
| ATOM | 2379 | HA  | ASP | 154 | 49.020 | 19.642 | 47.961 | 0.00 | 0.00 |
| ATOM | 2380 | CB  | ASP | 154 | 47.683 | 18.931 | 49.379 | 0.00 | 0.00 |
| ATOM | 2381 | HB2 | ASP | 154 | 48.119 | 17.932 | 49.392 | 0.00 | 0.00 |
| ATOM | 2382 | HB3 | ASP | 154 | 47.364 | 19.114 | 50.406 | 0.00 | 0.00 |
| ATOM | 2383 | CG  | ASP | 154 | 46.415 | 19.019 | 48.500 | 0.00 | 0.00 |
| ATOM | 2384 | OD1 | ASP | 154 | 46.325 | 19.999 | 47.689 | 0.00 | 0.00 |
| ATOM | 2385 | OD2 | ASP | 154 | 45.621 | 18.102 | 48.431 | 0.00 | 0.00 |
| ATOM | 2386 | C   | ASP | 154 | 48.408 | 21.389 | 48.972 | 0.00 | 0.00 |
| ATOM | 2387 | O   | ASP | 154 | 47.634 | 21.871 | 49.799 | 0.00 | 0.00 |
| ATOM | 2388 | N   | ARG | 155 | 48.890 | 22.128 | 47.943 | 0.00 | 0.00 |
| ATOM | 2389 | H   | ARG | 155 | 49.472 | 21.658 | 47.264 | 0.00 | 0.00 |
| ATOM | 2390 | CA  | ARG | 155 | 48.662 | 23.550 | 47.730 | 0.00 | 0.00 |
| ATOM | 2391 | HA  | ARG | 155 | 48.800 | 24.045 | 48.691 | 0.00 | 0.00 |

|      |      |      |     |     |        |        |        |      |      |
|------|------|------|-----|-----|--------|--------|--------|------|------|
| ATOM | 2392 | CB   | ARG | 155 | 49.680 | 24.104 | 46.790 | 0.00 | 0.00 |
| ATOM | 2393 | HB2  | ARG | 155 | 49.560 | 23.629 | 45.817 | 0.00 | 0.00 |
| ATOM | 2394 | HB3  | ARG | 155 | 49.304 | 25.123 | 46.698 | 0.00 | 0.00 |
| ATOM | 2395 | CG   | ARG | 155 | 51.125 | 24.070 | 47.303 | 0.00 | 0.00 |
| ATOM | 2396 | HG2  | ARG | 155 | 51.295 | 24.749 | 48.139 | 0.00 | 0.00 |
| ATOM | 2397 | HG3  | ARG | 155 | 51.380 | 23.070 | 47.653 | 0.00 | 0.00 |
| ATOM | 2398 | CD   | ARG | 155 | 52.057 | 24.525 | 46.241 | 0.00 | 0.00 |
| ATOM | 2399 | HD2  | ARG | 155 | 52.017 | 23.815 | 45.415 | 0.00 | 0.00 |
| ATOM | 2400 | HD3  | ARG | 155 | 51.771 | 25.523 | 45.912 | 0.00 | 0.00 |
| ATOM | 2401 | NE   | ARG | 155 | 53.434 | 24.598 | 46.756 | 0.00 | 0.00 |
| ATOM | 2402 | HE   | ARG | 155 | 54.179 | 23.933 | 46.603 | 0.00 | 0.00 |
| ATOM | 2403 | CZ   | ARG | 155 | 54.080 | 25.589 | 47.436 | 0.00 | 0.00 |
| ATOM | 2404 | NH1  | ARG | 155 | 53.620 | 26.778 | 47.631 | 0.00 | 0.00 |
| ATOM | 2405 | 1HH1 | ARG | 155 | 54.307 | 27.509 | 47.745 | 0.00 | 0.00 |
| ATOM | 2406 | 2HH1 | ARG | 155 | 52.770 | 27.119 | 47.205 | 0.00 | 0.00 |
| ATOM | 2407 | NH2  | ARG | 155 | 55.219 | 25.339 | 47.905 | 0.00 | 0.00 |
| ATOM | 2408 | 1HH2 | ARG | 155 | 55.851 | 25.980 | 48.362 | 0.00 | 0.00 |
| ATOM | 2409 | 2HH2 | ARG | 155 | 55.617 | 24.413 | 47.962 | 0.00 | 0.00 |
| ATOM | 2410 | C    | ARG | 155 | 47.236 | 23.879 | 47.226 | 0.00 | 0.00 |
| ATOM | 2411 | O    | ARG | 155 | 46.840 | 25.001 | 47.196 | 0.00 | 0.00 |
| ATOM | 2412 | N    | GLN | 156 | 46.469 | 22.901 | 46.811 | 0.00 | 0.00 |
| ATOM | 2413 | H    | GLN | 156 | 46.843 | 21.983 | 47.008 | 0.00 | 0.00 |
| ATOM | 2414 | CA   | GLN | 156 | 45.082 | 23.118 | 46.471 | 0.00 | 0.00 |
| ATOM | 2415 | HA   | GLN | 156 | 44.917 | 24.127 | 46.093 | 0.00 | 0.00 |
| ATOM | 2416 | CB   | GLN | 156 | 44.625 | 22.244 | 45.261 | 0.00 | 0.00 |
| ATOM | 2417 | HB2  | GLN | 156 | 45.106 | 21.294 | 45.491 | 0.00 | 0.00 |



|      |      |      |     |     |        |        |        |      |      |
|------|------|------|-----|-----|--------|--------|--------|------|------|
| ATOM | 2418 | HB3  | GLN | 156 | 43.571 | 21.992 | 45.382 | 0.00 | 0.00 |
| ATOM | 2419 | CG   | GLN | 156 | 45.072 | 22.758 | 43.842 | 0.00 | 0.00 |
| ATOM | 2420 | HG2  | GLN | 156 | 44.320 | 23.335 | 43.304 | 0.00 | 0.00 |
| ATOM | 2421 | HG3  | GLN | 156 | 45.968 | 23.350 | 44.030 | 0.00 | 0.00 |
| ATOM | 2422 | CD   | GLN | 156 | 45.386 | 21.593 | 42.854 | 0.00 | 0.00 |
| ATOM | 2423 | OE1  | GLN | 156 | 46.463 | 21.016 | 42.727 | 0.00 | 0.00 |
| ATOM | 2424 | NE2  | GLN | 156 | 44.355 | 21.029 | 42.277 | 0.00 | 0.00 |
| ATOM | 2425 | 1HE2 | GLN | 156 | 44.528 | 20.387 | 41.517 | 0.00 | 0.00 |
| ATOM | 2426 | 2HE2 | GLN | 156 | 43.388 | 21.287 | 42.414 | 0.00 | 0.00 |
| ATOM | 2427 | C    | GLN | 156 | 44.159 | 22.970 | 47.721 | 0.00 | 0.00 |
| ATOM | 2428 | O    | GLN | 156 | 43.140 | 23.643 | 47.812 | 0.00 | 0.00 |
| ATOM | 2429 | N    | GLN | 157 | 44.517 | 22.147 | 48.719 | 0.00 | 0.00 |
| ATOM | 2430 | H    | GLN | 157 | 45.321 | 21.554 | 48.569 | 0.00 | 0.00 |
| ATOM | 2431 | CA   | GLN | 157 | 43.808 | 22.321 | 50.034 | 0.00 | 0.00 |
| ATOM | 2432 | HA   | GLN | 157 | 42.733 | 22.263 | 49.866 | 0.00 | 0.00 |
| ATOM | 2433 | CB   | GLN | 157 | 44.098 | 21.061 | 50.843 | 0.00 | 0.00 |
| ATOM | 2434 | HB2  | GLN | 157 | 45.146 | 20.762 | 50.824 | 0.00 | 0.00 |
| ATOM | 2435 | HB3  | GLN | 157 | 43.850 | 21.163 | 51.900 | 0.00 | 0.00 |
| ATOM | 2436 | CG   | GLN | 157 | 43.338 | 19.784 | 50.342 | 0.00 | 0.00 |
| ATOM | 2437 | HG2  | GLN | 157 | 42.272 | 19.990 | 50.433 | 0.00 | 0.00 |
| ATOM | 2438 | HG3  | GLN | 157 | 43.604 | 19.636 | 49.295 | 0.00 | 0.00 |
| ATOM | 2439 | CD   | GLN | 157 | 43.693 | 18.643 | 51.309 | 0.00 | 0.00 |
| ATOM | 2440 | OE1  | GLN | 157 | 43.262 | 18.654 | 52.465 | 0.00 | 0.00 |
| ATOM | 2441 | NE2  | GLN | 157 | 44.482 | 17.706 | 51.006 | 0.00 | 0.00 |
| ATOM | 2442 | 1HE2 | GLN | 157 | 44.632 | 16.899 | 51.594 | 0.00 | 0.00 |
| ATOM | 2443 | 2HE2 | GLN | 157 | 44.731 | 17.754 | 50.028 | 0.00 | 0.00 |

|      |      |     |     |     |        |        |        |      |      |
|------|------|-----|-----|-----|--------|--------|--------|------|------|
| ATOM | 2444 | C   | GLN | 157 | 44.086 | 23.613 | 50.820 | 0.00 | 0.00 |
| ATOM | 2445 | O   | GLN | 157 | 43.282 | 24.187 | 51.494 | 0.00 | 0.00 |
| ATOM | 2446 | N   | ALA | 158 | 45.330 | 24.090 | 50.662 | 0.00 | 0.00 |
| ATOM | 2447 | H   | ALA | 158 | 45.881 | 23.573 | 49.992 | 0.00 | 0.00 |
| ATOM | 2448 | CA  | ALA | 158 | 45.844 | 25.319 | 51.251 | 0.00 | 0.00 |
| ATOM | 2449 | HA  | ALA | 158 | 45.379 | 25.473 | 52.225 | 0.00 | 0.00 |
| ATOM | 2450 | CB  | ALA | 158 | 47.332 | 25.166 | 51.481 | 0.00 | 0.00 |
| ATOM | 2451 | HB1 | ALA | 158 | 47.672 | 26.057 | 52.008 | 0.00 | 0.00 |
| ATOM | 2452 | HB2 | ALA | 158 | 47.614 | 24.255 | 52.009 | 0.00 | 0.00 |
| ATOM | 2453 | HB3 | ALA | 158 | 47.798 | 25.259 | 50.500 | 0.00 | 0.00 |
| ATOM | 2454 | C   | ALA | 158 | 45.462 | 26.582 | 50.440 | 0.00 | 0.00 |
| ATOM | 2455 | O   | ALA | 158 | 45.859 | 27.591 | 50.895 | 0.00 | 0.00 |
| ATOM | 2456 | N   | ALA | 159 | 44.614 | 26.498 | 49.421 | 0.00 | 0.00 |
| ATOM | 2457 | H   | ALA | 159 | 44.267 | 25.564 | 49.259 | 0.00 | 0.00 |
| ATOM | 2458 | CA  | ALA | 159 | 44.158 | 27.658 | 48.605 | 0.00 | 0.00 |
| ATOM | 2459 | HA  | ALA | 159 | 45.058 | 28.260 | 48.486 | 0.00 | 0.00 |
| ATOM | 2460 | CB  | ALA | 159 | 43.642 | 27.102 | 47.298 | 0.00 | 0.00 |
| ATOM | 2461 | HB1 | ALA | 159 | 42.912 | 26.300 | 47.408 | 0.00 | 0.00 |
| ATOM | 2462 | HB2 | ALA | 159 | 43.276 | 27.946 | 46.714 | 0.00 | 0.00 |
| ATOM | 2463 | HB3 | ALA | 159 | 44.562 | 26.655 | 46.922 | 0.00 | 0.00 |
| ATOM | 2464 | C   | ALA | 159 | 43.138 | 28.558 | 49.307 | 0.00 | 0.00 |
| ATOM | 2465 | O   | ALA | 159 | 42.002 | 28.210 | 49.584 | 0.00 | 0.00 |
| ATOM | 2466 | N   | GLY | 160 | 43.632 | 29.690 | 49.729 | 0.00 | 0.00 |
| ATOM | 2467 | H   | GLY | 160 | 44.588 | 29.915 | 49.493 | 0.00 | 0.00 |
| ATOM | 2468 | CA  | GLY | 160 | 42.904 | 30.682 | 50.545 | 0.00 | 0.00 |
| ATOM | 2469 | HA2 | GLY | 160 | 43.202 | 31.655 | 50.155 | 0.00 | 0.00 |

|      |      |     |     |     |        |        |        |      |      |
|------|------|-----|-----|-----|--------|--------|--------|------|------|
| ATOM | 2470 | HA3 | GLY | 160 | 41.831 | 30.570 | 50.389 | 0.00 | 0.00 |
| ATOM | 2471 | C   | GLY | 160 | 43.197 | 30.614 | 52.058 | 0.00 | 0.00 |
| ATOM | 2472 | O   | GLY | 160 | 42.381 | 31.139 | 52.822 | 0.00 | 0.00 |
| ATOM | 2473 | N   | TYR | 161 | 44.301 | 29.973 | 52.499 | 0.00 | 0.00 |
| ATOM | 2474 | H   | TYR | 161 | 44.734 | 29.431 | 51.765 | 0.00 | 0.00 |
| ATOM | 2475 | CA  | TYR | 161 | 44.657 | 29.731 | 53.864 | 0.00 | 0.00 |
| ATOM | 2476 | HA  | TYR | 161 | 43.999 | 30.200 | 54.595 | 0.00 | 0.00 |
| ATOM | 2477 | CB  | TYR | 161 | 44.615 | 28.270 | 54.086 | 0.00 | 0.00 |
| ATOM | 2478 | HB2 | TYR | 161 | 45.229 | 27.697 | 53.390 | 0.00 | 0.00 |
| ATOM | 2479 | HB3 | TYR | 161 | 45.008 | 28.036 | 55.076 | 0.00 | 0.00 |
| ATOM | 2480 | CG  | TYR | 161 | 43.235 | 27.695 | 54.086 | 0.00 | 0.00 |
| ATOM | 2481 | CD1 | TYR | 161 | 42.588 | 27.580 | 55.345 | 0.00 | 0.00 |
| ATOM | 2482 | HD1 | TYR | 161 | 43.060 | 27.923 | 56.254 | 0.00 | 0.00 |
| ATOM | 2483 | CE1 | TYR | 161 | 41.225 | 27.213 | 55.425 | 0.00 | 0.00 |
| ATOM | 2484 | HE1 | TYR | 161 | 40.626 | 27.219 | 56.324 | 0.00 | 0.00 |
| ATOM | 2485 | CZ  | TYR | 161 | 40.545 | 26.950 | 54.235 | 0.00 | 0.00 |
| ATOM | 2486 | OH  | TYR | 161 | 39.247 | 26.645 | 54.430 | 0.00 | 0.00 |
| ATOM | 2487 | HH  | TYR | 161 | 38.772 | 26.310 | 53.666 | 0.00 | 0.00 |
| ATOM | 2488 | CE2 | TYR | 161 | 41.217 | 26.996 | 52.987 | 0.00 | 0.00 |
| ATOM | 2489 | HE2 | TYR | 161 | 40.725 | 26.670 | 52.083 | 0.00 | 0.00 |
| ATOM | 2490 | CD2 | TYR | 161 | 42.571 | 27.312 | 52.919 | 0.00 | 0.00 |
| ATOM | 2491 | HD2 | TYR | 161 | 43.117 | 27.236 | 51.991 | 0.00 | 0.00 |
| ATOM | 2492 | C   | TYR | 161 | 46.079 | 30.262 | 54.313 | 0.00 | 0.00 |
| ATOM | 2493 | O   | TYR | 161 | 47.003 | 30.452 | 53.509 | 0.00 | 0.00 |
| ATOM | 2494 | N   | ARG | 162 | 46.284 | 30.418 | 55.651 | 0.00 | 0.00 |
| ATOM | 2495 | H   | ARG | 162 | 45.402 | 30.253 | 56.114 | 0.00 | 0.00 |

|      |      |      |     |     |        |        |        |      |      |
|------|------|------|-----|-----|--------|--------|--------|------|------|
| ATOM | 2496 | CA   | ARG | 162 | 47.509 | 30.790 | 56.356 | 0.00 | 0.00 |
| ATOM | 2497 | HA   | ARG | 162 | 48.371 | 30.635 | 55.706 | 0.00 | 0.00 |
| ATOM | 2498 | CB   | ARG | 162 | 47.355 | 32.208 | 56.739 | 0.00 | 0.00 |
| ATOM | 2499 | HB2  | ARG | 162 | 48.304 | 32.699 | 56.954 | 0.00 | 0.00 |
| ATOM | 2500 | HB3  | ARG | 162 | 47.011 | 32.714 | 55.837 | 0.00 | 0.00 |
| ATOM | 2501 | CG   | ARG | 162 | 46.344 | 32.409 | 57.910 | 0.00 | 0.00 |
| ATOM | 2502 | HG2  | ARG | 162 | 45.387 | 32.134 | 57.466 | 0.00 | 0.00 |
| ATOM | 2503 | HG3  | ARG | 162 | 46.542 | 31.885 | 58.845 | 0.00 | 0.00 |
| ATOM | 2504 | CD   | ARG | 162 | 46.118 | 33.859 | 58.338 | 0.00 | 0.00 |
| ATOM | 2505 | HD2  | ARG | 162 | 47.078 | 34.358 | 58.469 | 0.00 | 0.00 |
| ATOM | 2506 | HD3  | ARG | 162 | 45.662 | 34.406 | 57.512 | 0.00 | 0.00 |
| ATOM | 2507 | NE   | ARG | 162 | 45.271 | 34.068 | 59.517 | 0.00 | 0.00 |
| ATOM | 2508 | HE   | ARG | 162 | 44.394 | 34.544 | 59.360 | 0.00 | 0.00 |
| ATOM | 2509 | CZ   | ARG | 162 | 45.737 | 33.955 | 60.728 | 0.00 | 0.00 |
| ATOM | 2510 | NH1  | ARG | 162 | 46.904 | 33.451 | 61.075 | 0.00 | 0.00 |
| ATOM | 2511 | 1HH1 | ARG | 162 | 47.018 | 33.549 | 62.074 | 0.00 | 0.00 |
| ATOM | 2512 | 2HH1 | ARG | 162 | 47.639 | 33.164 | 60.445 | 0.00 | 0.00 |
| ATOM | 2513 | NH2  | ARG | 162 | 45.025 | 34.401 | 61.680 | 0.00 | 0.00 |
| ATOM | 2514 | 1HH2 | ARG | 162 | 45.302 | 34.474 | 62.648 | 0.00 | 0.00 |
| ATOM | 2515 | 2HH2 | ARG | 162 | 44.198 | 34.939 | 61.461 | 0.00 | 0.00 |
| ATOM | 2516 | C    | ARG | 162 | 47.765 | 29.897 | 57.585 | 0.00 | 0.00 |
| ATOM | 2517 | O    | ARG | 162 | 46.849 | 29.174 | 57.932 | 0.00 | 0.00 |
| ATOM | 2518 | N    | LEU | 163 | 48.816 | 29.927 | 58.376 | 0.00 | 0.00 |
| ATOM | 2519 | H    | LEU | 163 | 49.545 | 30.559 | 58.078 | 0.00 | 0.00 |
| ATOM | 2520 | CA   | LEU | 163 | 49.093 | 28.968 | 59.506 | 0.00 | 0.00 |
| ATOM | 2521 | HA   | LEU | 163 | 48.838 | 27.940 | 59.247 | 0.00 | 0.00 |

|      |      |      |     |     |        |        |        |      |      |
|------|------|------|-----|-----|--------|--------|--------|------|------|
| ATOM | 2522 | CB   | LEU | 163 | 50.579 | 29.106 | 59.822 | 0.00 | 0.00 |
| ATOM | 2523 | HB2  | LEU | 163 | 50.912 | 30.135 | 59.959 | 0.00 | 0.00 |
| ATOM | 2524 | HB3  | LEU | 163 | 50.860 | 28.718 | 60.802 | 0.00 | 0.00 |
| ATOM | 2525 | CG   | LEU | 163 | 51.570 | 28.530 | 58.758 | 0.00 | 0.00 |
| ATOM | 2526 | HG   | LEU | 163 | 51.296 | 28.940 | 57.786 | 0.00 | 0.00 |
| ATOM | 2527 | CD1  | LEU | 163 | 52.987 | 28.958 | 58.953 | 0.00 | 0.00 |
| ATOM | 2528 | 1HD1 | LEU | 163 | 52.948 | 30.034 | 58.787 | 0.00 | 0.00 |
| ATOM | 2529 | 2HD1 | LEU | 163 | 53.241 | 28.720 | 59.986 | 0.00 | 0.00 |
| ATOM | 2530 | 3HD1 | LEU | 163 | 53.666 | 28.342 | 58.364 | 0.00 | 0.00 |
| ATOM | 2531 | CD2  | LEU | 163 | 51.577 | 26.933 | 58.748 | 0.00 | 0.00 |
| ATOM | 2532 | 1HD2 | LEU | 163 | 50.539 | 26.601 | 58.764 | 0.00 | 0.00 |
| ATOM | 2533 | 2HD2 | LEU | 163 | 51.917 | 26.582 | 57.773 | 0.00 | 0.00 |
| ATOM | 2534 | 3HD2 | LEU | 163 | 52.181 | 26.586 | 59.586 | 0.00 | 0.00 |
| ATOM | 2535 | C    | LEU | 163 | 48.359 | 29.294 | 60.837 | 0.00 | 0.00 |
| ATOM | 2536 | O    | LEU | 163 | 48.392 | 30.411 | 61.290 | 0.00 | 0.00 |
| ATOM | 2537 | N    | ASN | 164 | 47.693 | 28.322 | 61.484 | 0.00 | 0.00 |
| ATOM | 2538 | H    | ASN | 164 | 47.584 | 27.379 | 61.140 | 0.00 | 0.00 |
| ATOM | 2539 | CA   | ASN | 164 | 46.878 | 28.427 | 62.650 | 0.00 | 0.00 |
| ATOM | 2540 | HA   | ASN | 164 | 46.430 | 29.420 | 62.670 | 0.00 | 0.00 |
| ATOM | 2541 | CB   | ASN | 164 | 45.830 | 27.223 | 62.647 | 0.00 | 0.00 |
| ATOM | 2542 | HB2  | ASN | 164 | 45.364 | 27.271 | 61.662 | 0.00 | 0.00 |
| ATOM | 2543 | HB3  | ASN | 164 | 46.451 | 26.330 | 62.705 | 0.00 | 0.00 |
| ATOM | 2544 | CG   | ASN | 164 | 44.652 | 27.314 | 63.638 | 0.00 | 0.00 |
| ATOM | 2545 | OD1  | ASN | 164 | 44.463 | 28.234 | 64.392 | 0.00 | 0.00 |
| ATOM | 2546 | ND2  | ASN | 164 | 43.830 | 26.301 | 63.643 | 0.00 | 0.00 |
| ATOM | 2547 | 1HD2 | ASN | 164 | 43.024 | 26.443 | 64.235 | 0.00 | 0.00 |

|      |      |      |     |     |        |        |        |      |      |
|------|------|------|-----|-----|--------|--------|--------|------|------|
| ATOM | 2548 | 2HD2 | ASN | 164 | 43.906 | 25.522 | 63.005 | 0.00 | 0.00 |
| ATOM | 2549 | C    | ASN | 164 | 47.713 | 28.401 | 64.042 | 0.00 | 0.00 |
| ATOM | 2550 | O    | ASN | 164 | 47.799 | 27.324 | 64.673 | 0.00 | 0.00 |
| ATOM | 2551 | N    | ILE | 165 | 48.212 | 29.592 | 64.437 | 0.00 | 0.00 |
| ATOM | 2552 | H    | ILE | 165 | 48.069 | 30.434 | 63.897 | 0.00 | 0.00 |
| ATOM | 2553 | CA   | ILE | 165 | 49.205 | 29.675 | 65.554 | 0.00 | 0.00 |
| ATOM | 2554 | HA   | ILE | 165 | 49.005 | 28.855 | 66.245 | 0.00 | 0.00 |
| ATOM | 2555 | CB   | ILE | 165 | 50.651 | 29.429 | 65.032 | 0.00 | 0.00 |
| ATOM | 2556 | HB   | ILE | 165 | 51.357 | 29.650 | 65.832 | 0.00 | 0.00 |
| ATOM | 2557 | CG2  | ILE | 165 | 50.828 | 27.855 | 64.904 | 0.00 | 0.00 |
| ATOM | 2558 | 1HG2 | ILE | 165 | 50.260 | 27.309 | 65.657 | 0.00 | 0.00 |
| ATOM | 2559 | 2HG2 | ILE | 165 | 50.340 | 27.503 | 63.995 | 0.00 | 0.00 |
| ATOM | 2560 | 3HG2 | ILE | 165 | 51.845 | 27.464 | 64.921 | 0.00 | 0.00 |
| ATOM | 2561 | CG1  | ILE | 165 | 50.892 | 30.315 | 63.827 | 0.00 | 0.00 |
| ATOM | 2562 | 2HG1 | ILE | 165 | 50.286 | 29.969 | 62.990 | 0.00 | 0.00 |
| ATOM | 2563 | 3HG1 | ILE | 165 | 50.495 | 31.307 | 64.043 | 0.00 | 0.00 |
| ATOM | 2564 | CD1  | ILE | 165 | 52.326 | 30.347 | 63.320 | 0.00 | 0.00 |
| ATOM | 2565 | 1HD1 | ILE | 165 | 52.743 | 29.386 | 63.022 | 0.00 | 0.00 |
| ATOM | 2566 | 2HD1 | ILE | 165 | 52.438 | 31.079 | 62.520 | 0.00 | 0.00 |
| ATOM | 2567 | 3HD1 | ILE | 165 | 53.092 | 30.756 | 63.979 | 0.00 | 0.00 |
| ATOM | 2568 | C    | ILE | 165 | 49.116 | 31.027 | 66.313 | 0.00 | 0.00 |
| ATOM | 2569 | O    | ILE | 165 | 48.423 | 31.900 | 65.800 | 0.00 | 0.00 |
| ATOM | 2570 | N    | PRO | 166 | 49.788 | 31.267 | 67.484 | 0.00 | 0.00 |
| ATOM | 2571 | CD   | PRO | 166 | 50.582 | 30.412 | 68.247 | 0.00 | 0.00 |
| ATOM | 2572 | HD2  | PRO | 166 | 50.158 | 29.415 | 68.371 | 0.00 | 0.00 |
| ATOM | 2573 | HD3  | PRO | 166 | 51.559 | 30.326 | 67.772 | 0.00 | 0.00 |

|      |      |     |     |     |        |        |        |      |      |
|------|------|-----|-----|-----|--------|--------|--------|------|------|
| ATOM | 2574 | CG  | PRO | 166 | 50.605 | 31.143 | 69.612 | 0.00 | 0.00 |
| ATOM | 2575 | HG2 | PRO | 166 | 49.734 | 30.948 | 70.238 | 0.00 | 0.00 |
| ATOM | 2576 | HG3 | PRO | 166 | 51.502 | 30.824 | 70.142 | 0.00 | 0.00 |
| ATOM | 2577 | CB  | PRO | 166 | 50.683 | 32.632 | 69.309 | 0.00 | 0.00 |
| ATOM | 2578 | HB2 | PRO | 166 | 50.248 | 33.291 | 70.061 | 0.00 | 0.00 |
| ATOM | 2579 | HB3 | PRO | 166 | 51.702 | 32.923 | 69.055 | 0.00 | 0.00 |
| ATOM | 2580 | CA  | PRO | 166 | 49.813 | 32.651 | 68.057 | 0.00 | 0.00 |
| ATOM | 2581 | HA  | PRO | 166 | 48.806 | 32.991 | 68.298 | 0.00 | 0.00 |
| ATOM | 2582 | C   | PRO | 166 | 50.389 | 33.626 | 66.999 | 0.00 | 0.00 |
| ATOM | 2583 | O   | PRO | 166 | 51.518 | 33.420 | 66.539 | 0.00 | 0.00 |
| ATOM | 2584 | N   | ALA | 167 | 49.742 | 34.743 | 66.776 | 0.00 | 0.00 |
| ATOM | 2585 | H   | ALA | 167 | 48.920 | 34.987 | 67.309 | 0.00 | 0.00 |
| ATOM | 2586 | CA  | ALA | 167 | 50.106 | 35.651 | 65.754 | 0.00 | 0.00 |
| ATOM | 2587 | HA  | ALA | 167 | 50.071 | 35.024 | 64.864 | 0.00 | 0.00 |
| ATOM | 2588 | CB  | ALA | 167 | 48.881 | 36.651 | 65.564 | 0.00 | 0.00 |
| ATOM | 2589 | HB1 | ALA | 167 | 48.051 | 36.016 | 65.254 | 0.00 | 0.00 |
| ATOM | 2590 | HB2 | ALA | 167 | 48.644 | 37.168 | 66.494 | 0.00 | 0.00 |
| ATOM | 2591 | HB3 | ALA | 167 | 49.049 | 37.369 | 64.761 | 0.00 | 0.00 |
| ATOM | 2592 | C   | ALA | 167 | 51.499 | 36.251 | 65.841 | 0.00 | 0.00 |
| ATOM | 2593 | O   | ALA | 167 | 51.952 | 36.704 | 66.949 | 0.00 | 0.00 |
| ATOM | 2594 | N   | GLY | 168 | 52.278 | 36.233 | 64.754 | 0.00 | 0.00 |
| ATOM | 2595 | H   | GLY | 168 | 51.859 | 35.859 | 63.914 | 0.00 | 0.00 |
| ATOM | 2596 | CA  | GLY | 168 | 53.729 | 36.612 | 64.828 | 0.00 | 0.00 |
| ATOM | 2597 | HA2 | GLY | 168 | 54.013 | 36.831 | 63.798 | 0.00 | 0.00 |
| ATOM | 2598 | HA3 | GLY | 168 | 53.795 | 37.507 | 65.447 | 0.00 | 0.00 |
| ATOM | 2599 | C   | GLY | 168 | 54.682 | 35.536 | 65.212 | 0.00 | 0.00 |

|      |      |      |     |     |        |        |        |      |      |
|------|------|------|-----|-----|--------|--------|--------|------|------|
| ATOM | 2600 | O    | GLY | 168 | 55.858 | 35.798 | 65.342 | 0.00 | 0.00 |
| ATOM | 2601 | N    | THR | 169 | 54.242 | 34.313 | 65.555 | 0.00 | 0.00 |
| ATOM | 2602 | H    | THR | 169 | 53.245 | 34.158 | 65.606 | 0.00 | 0.00 |
| ATOM | 2603 | CA   | THR | 169 | 55.152 | 33.168 | 65.617 | 0.00 | 0.00 |
| ATOM | 2604 | HA   | THR | 169 | 56.175 | 33.481 | 65.827 | 0.00 | 0.00 |
| ATOM | 2605 | CB   | THR | 169 | 54.737 | 32.129 | 66.714 | 0.00 | 0.00 |
| ATOM | 2606 | HB   | THR | 169 | 55.389 | 31.256 | 66.684 | 0.00 | 0.00 |
| ATOM | 2607 | CG2  | THR | 169 | 54.719 | 32.700 | 68.164 | 0.00 | 0.00 |
| ATOM | 2608 | 1HG2 | THR | 169 | 54.376 | 32.046 | 68.966 | 0.00 | 0.00 |
| ATOM | 2609 | 2HG2 | THR | 169 | 55.751 | 32.944 | 68.416 | 0.00 | 0.00 |
| ATOM | 2610 | 3HG2 | THR | 169 | 54.045 | 33.557 | 68.166 | 0.00 | 0.00 |
| ATOM | 2611 | OG1  | THR | 169 | 53.516 | 31.527 | 66.605 | 0.00 | 0.00 |
| ATOM | 2612 | HG1  | THR | 169 | 52.841 | 32.206 | 66.548 | 0.00 | 0.00 |
| ATOM | 2613 | C    | THR | 169 | 55.207 | 32.498 | 64.265 | 0.00 | 0.00 |
| ATOM | 2614 | O    | THR | 169 | 54.384 | 32.698 | 63.372 | 0.00 | 0.00 |
| ATOM | 2615 | N    | ALA | 170 | 56.217 | 31.718 | 63.952 | 0.00 | 0.00 |
| ATOM | 2616 | H    | ALA | 170 | 56.907 | 31.537 | 64.666 | 0.00 | 0.00 |
| ATOM | 2617 | CA   | ALA | 170 | 56.517 | 31.083 | 62.624 | 0.00 | 0.00 |
| ATOM | 2618 | HA   | ALA | 170 | 55.753 | 31.412 | 61.921 | 0.00 | 0.00 |
| ATOM | 2619 | CB   | ALA | 170 | 57.931 | 31.470 | 62.176 | 0.00 | 0.00 |
| ATOM | 2620 | HB1  | ALA | 170 | 58.169 | 31.004 | 61.219 | 0.00 | 0.00 |
| ATOM | 2621 | HB2  | ALA | 170 | 58.043 | 32.553 | 62.117 | 0.00 | 0.00 |
| ATOM | 2622 | HB3  | ALA | 170 | 58.628 | 31.067 | 62.910 | 0.00 | 0.00 |
| ATOM | 2623 | C    | ALA | 170 | 56.369 | 29.573 | 62.733 | 0.00 | 0.00 |
| ATOM | 2624 | O    | ALA | 170 | 56.235 | 28.952 | 63.808 | 0.00 | 0.00 |
| ATOM | 2625 | N    | VAL | 171 | 56.421 | 28.906 | 61.600 | 0.00 | 0.00 |



|      |      |      |     |     |        |        |        |      |      |
|------|------|------|-----|-----|--------|--------|--------|------|------|
| ATOM | 2626 | H    | VAL | 171 | 56.410 | 29.519 | 60.797 | 0.00 | 0.00 |
| ATOM | 2627 | CA   | VAL | 171 | 56.777 | 27.508 | 61.427 | 0.00 | 0.00 |
| ATOM | 2628 | HA   | VAL | 171 | 57.005 | 27.174 | 62.439 | 0.00 | 0.00 |
| ATOM | 2629 | CB   | VAL | 171 | 55.688 | 26.528 | 60.922 | 0.00 | 0.00 |
| ATOM | 2630 | HB   | VAL | 171 | 55.255 | 26.967 | 60.023 | 0.00 | 0.00 |
| ATOM | 2631 | CG1  | VAL | 171 | 56.346 | 25.144 | 60.705 | 0.00 | 0.00 |
| ATOM | 2632 | 1HG1 | VAL | 171 | 55.592 | 24.367 | 60.582 | 0.00 | 0.00 |
| ATOM | 2633 | 2HG1 | VAL | 171 | 57.041 | 25.253 | 59.872 | 0.00 | 0.00 |
| ATOM | 2634 | 3HG1 | VAL | 171 | 56.997 | 24.916 | 61.549 | 0.00 | 0.00 |
| ATOM | 2635 | CG2  | VAL | 171 | 54.586 | 26.301 | 62.021 | 0.00 | 0.00 |
| ATOM | 2636 | 1HG2 | VAL | 171 | 54.186 | 27.193 | 62.504 | 0.00 | 0.00 |
| ATOM | 2637 | 2HG2 | VAL | 171 | 53.744 | 25.704 | 61.671 | 0.00 | 0.00 |
| ATOM | 2638 | 3HG2 | VAL | 171 | 55.045 | 25.811 | 62.879 | 0.00 | 0.00 |
| ATOM | 2639 | C    | VAL | 171 | 58.088 | 27.407 | 60.651 | 0.00 | 0.00 |
| ATOM | 2640 | O    | VAL | 171 | 58.243 | 27.996 | 59.606 | 0.00 | 0.00 |
| ATOM | 2641 | N    | ARG | 172 | 59.023 | 26.696 | 61.188 | 0.00 | 0.00 |
| ATOM | 2642 | H    | ARG | 172 | 58.760 | 26.131 | 61.983 | 0.00 | 0.00 |
| ATOM | 2643 | CA   | ARG | 172 | 60.235 | 26.296 | 60.500 | 0.00 | 0.00 |
| ATOM | 2644 | HA   | ARG | 172 | 60.340 | 26.866 | 59.577 | 0.00 | 0.00 |
| ATOM | 2645 | CB   | ARG | 172 | 61.434 | 26.578 | 61.380 | 0.00 | 0.00 |
| ATOM | 2646 | HB2  | ARG | 172 | 61.294 | 26.126 | 62.361 | 0.00 | 0.00 |
| ATOM | 2647 | HB3  | ARG | 172 | 62.311 | 26.059 | 60.993 | 0.00 | 0.00 |
| ATOM | 2648 | CG   | ARG | 172 | 61.906 | 28.052 | 61.374 | 0.00 | 0.00 |
| ATOM | 2649 | HG2  | ARG | 172 | 62.003 | 28.448 | 60.363 | 0.00 | 0.00 |
| ATOM | 2650 | HG3  | ARG | 172 | 61.080 | 28.708 | 61.647 | 0.00 | 0.00 |
| ATOM | 2651 | CD   | ARG | 172 | 63.049 | 28.354 | 62.287 | 0.00 | 0.00 |

|      |      |      |     |     |        |        |        |      |      |
|------|------|------|-----|-----|--------|--------|--------|------|------|
| ATOM | 2652 | HD2  | ARG | 172 | 63.847 | 27.654 | 62.038 | 0.00 | 0.00 |
| ATOM | 2653 | HD3  | ARG | 172 | 63.478 | 29.345 | 62.140 | 0.00 | 0.00 |
| ATOM | 2654 | NE   | ARG | 172 | 62.743 | 28.153 | 63.700 | 0.00 | 0.00 |
| ATOM | 2655 | HE   | ARG | 172 | 62.627 | 27.216 | 64.059 | 0.00 | 0.00 |
| ATOM | 2656 | CZ   | ARG | 172 | 62.256 | 29.053 | 64.550 | 0.00 | 0.00 |
| ATOM | 2657 | NH1  | ARG | 172 | 62.074 | 30.268 | 64.300 | 0.00 | 0.00 |
| ATOM | 2658 | 1HH1 | ARG | 172 | 61.573 | 30.769 | 65.019 | 0.00 | 0.00 |
| ATOM | 2659 | 2HH1 | ARG | 172 | 62.264 | 30.540 | 63.346 | 0.00 | 0.00 |
| ATOM | 2660 | NH2  | ARG | 172 | 62.134 | 28.739 | 65.823 | 0.00 | 0.00 |
| ATOM | 2661 | 1HH2 | ARG | 172 | 61.681 | 29.291 | 66.537 | 0.00 | 0.00 |
| ATOM | 2662 | 2HH2 | ARG | 172 | 62.345 | 27.779 | 66.057 | 0.00 | 0.00 |
| ATOM | 2663 | C    | ARG | 172 | 60.226 | 24.858 | 60.085 | 0.00 | 0.00 |
| ATOM | 2664 | O    | ARG | 172 | 59.727 | 23.995 | 60.791 | 0.00 | 0.00 |
| ATOM | 2665 | N    | PHE | 173 | 60.774 | 24.601 | 58.928 | 0.00 | 0.00 |
| ATOM | 2666 | H    | PHE | 173 | 61.165 | 25.328 | 58.346 | 0.00 | 0.00 |
| ATOM | 2667 | CA   | PHE | 173 | 60.822 | 23.357 | 58.224 | 0.00 | 0.00 |
| ATOM | 2668 | HA   | PHE | 173 | 60.158 | 22.655 | 58.729 | 0.00 | 0.00 |
| ATOM | 2669 | CB   | PHE | 173 | 60.000 | 23.441 | 56.893 | 0.00 | 0.00 |
| ATOM | 2670 | HB2  | PHE | 173 | 60.542 | 23.923 | 56.079 | 0.00 | 0.00 |
| ATOM | 2671 | HB3  | PHE | 173 | 59.880 | 22.408 | 56.568 | 0.00 | 0.00 |
| ATOM | 2672 | CG   | PHE | 173 | 58.547 | 23.956 | 57.120 | 0.00 | 0.00 |
| ATOM | 2673 | CD1  | PHE | 173 | 57.536 | 23.049 | 57.269 | 0.00 | 0.00 |
| ATOM | 2674 | HD1  | PHE | 173 | 57.732 | 21.990 | 57.337 | 0.00 | 0.00 |
| ATOM | 2675 | CE1  | PHE | 173 | 56.191 | 23.452 | 57.432 | 0.00 | 0.00 |
| ATOM | 2676 | HE1  | PHE | 173 | 55.447 | 22.693 | 57.620 | 0.00 | 0.00 |
| ATOM | 2677 | CZ   | PHE | 173 | 55.859 | 24.798 | 57.262 | 0.00 | 0.00 |

|      |      |     |     |     |        |        |        |      |      |
|------|------|-----|-----|-----|--------|--------|--------|------|------|
| ATOM | 2678 | HZ  | PHE | 173 | 54.833 | 25.131 | 57.322 | 0.00 | 0.00 |
| ATOM | 2679 | CE2 | PHE | 173 | 56.891 | 25.785 | 57.086 | 0.00 | 0.00 |
| ATOM | 2680 | HE2 | PHE | 173 | 56.596 | 26.819 | 56.984 | 0.00 | 0.00 |
| ATOM | 2681 | CD2 | PHE | 173 | 58.220 | 25.321 | 56.934 | 0.00 | 0.00 |
| ATOM | 2682 | HD2 | PHE | 173 | 59.008 | 26.041 | 56.769 | 0.00 | 0.00 |
| ATOM | 2683 | C   | PHE | 173 | 62.231 | 22.770 | 57.904 | 0.00 | 0.00 |
| ATOM | 2684 | O   | PHE | 173 | 62.853 | 23.330 | 57.018 | 0.00 | 0.00 |
| ATOM | 2685 | N   | GLU | 174 | 62.684 | 21.739 | 58.645 | 0.00 | 0.00 |
| ATOM | 2686 | H   | GLU | 174 | 62.027 | 21.349 | 59.306 | 0.00 | 0.00 |
| ATOM | 2687 | CA  | GLU | 174 | 64.033 | 21.176 | 58.438 | 0.00 | 0.00 |
| ATOM | 2688 | HA  | GLU | 174 | 64.625 | 22.092 | 58.447 | 0.00 | 0.00 |
| ATOM | 2689 | CB  | GLU | 174 | 64.525 | 20.276 | 59.599 | 0.00 | 0.00 |
| ATOM | 2690 | HB2 | GLU | 174 | 63.996 | 19.325 | 59.547 | 0.00 | 0.00 |
| ATOM | 2691 | HB3 | GLU | 174 | 65.577 | 20.044 | 59.432 | 0.00 | 0.00 |
| ATOM | 2692 | CG  | GLU | 174 | 64.421 | 20.987 | 61.004 | 0.00 | 0.00 |
| ATOM | 2693 | HG2 | GLU | 174 | 63.606 | 21.708 | 61.058 | 0.00 | 0.00 |
| ATOM | 2694 | HG3 | GLU | 174 | 64.214 | 20.230 | 61.761 | 0.00 | 0.00 |
| ATOM | 2695 | CD  | GLU | 174 | 65.778 | 21.609 | 61.487 | 0.00 | 0.00 |
| ATOM | 2696 | OE1 | GLU | 174 | 66.270 | 22.535 | 60.758 | 0.00 | 0.00 |
| ATOM | 2697 | OE2 | GLU | 174 | 66.211 | 21.302 | 62.621 | 0.00 | 0.00 |
| ATOM | 2698 | C   | GLU | 174 | 64.168 | 20.498 | 57.056 | 0.00 | 0.00 |
| ATOM | 2699 | O   | GLU | 174 | 63.192 | 19.855 | 56.654 | 0.00 | 0.00 |
| ATOM | 2700 | N   | PRO | 175 | 65.339 | 20.614 | 56.430 | 0.00 | 0.00 |
| ATOM | 2701 | CD  | PRO | 175 | 66.414 | 21.498 | 56.836 | 0.00 | 0.00 |
| ATOM | 2702 | HD2 | PRO | 175 | 66.144 | 22.538 | 56.655 | 0.00 | 0.00 |
| ATOM | 2703 | HD3 | PRO | 175 | 66.645 | 21.379 | 57.895 | 0.00 | 0.00 |

|      |      |     |     |     |        |        |        |      |      |
|------|------|-----|-----|-----|--------|--------|--------|------|------|
| ATOM | 2704 | CG  | PRO | 175 | 67.529 | 21.099 | 55.865 | 0.00 | 0.00 |
| ATOM | 2705 | HG2 | PRO | 175 | 68.368 | 21.787 | 55.758 | 0.00 | 0.00 |
| ATOM | 2706 | HG3 | PRO | 175 | 68.130 | 20.259 | 56.214 | 0.00 | 0.00 |
| ATOM | 2707 | CB  | PRO | 175 | 66.744 | 20.743 | 54.599 | 0.00 | 0.00 |
| ATOM | 2708 | HB2 | PRO | 175 | 66.410 | 21.664 | 54.121 | 0.00 | 0.00 |
| ATOM | 2709 | HB3 | PRO | 175 | 67.343 | 20.148 | 53.910 | 0.00 | 0.00 |
| ATOM | 2710 | CA  | PRO | 175 | 65.481 | 20.038 | 55.076 | 0.00 | 0.00 |
| ATOM | 2711 | HA  | PRO | 175 | 64.644 | 20.308 | 54.432 | 0.00 | 0.00 |
| ATOM | 2712 | C   | PRO | 175 | 65.536 | 18.566 | 55.041 | 0.00 | 0.00 |
| ATOM | 2713 | O   | PRO | 175 | 66.168 | 17.920 | 55.873 | 0.00 | 0.00 |
| ATOM | 2714 | N   | GLY | 176 | 64.805 | 17.970 | 54.088 | 0.00 | 0.00 |
| ATOM | 2715 | H   | GLY | 176 | 64.332 | 18.544 | 53.405 | 0.00 | 0.00 |
| ATOM | 2716 | CA  | GLY | 176 | 64.668 | 16.500 | 53.903 | 0.00 | 0.00 |
| ATOM | 2717 | HA2 | GLY | 176 | 64.271 | 16.257 | 52.917 | 0.00 | 0.00 |
| ATOM | 2718 | HA3 | GLY | 176 | 65.617 | 15.965 | 53.889 | 0.00 | 0.00 |
| ATOM | 2719 | C   | GLY | 176 | 63.701 | 15.902 | 54.940 | 0.00 | 0.00 |
| ATOM | 2720 | O   | GLY | 176 | 63.220 | 14.776 | 54.775 | 0.00 | 0.00 |
| ATOM | 2721 | N   | GLN | 177 | 63.324 | 16.651 | 55.912 | 0.00 | 0.00 |
| ATOM | 2722 | H   | GLN | 177 | 63.859 | 17.497 | 56.047 | 0.00 | 0.00 |
| ATOM | 2723 | CA  | GLN | 177 | 62.384 | 16.361 | 56.918 | 0.00 | 0.00 |
| ATOM | 2724 | HA  | GLN | 177 | 62.500 | 15.314 | 57.200 | 0.00 | 0.00 |
| ATOM | 2725 | CB  | GLN | 177 | 62.730 | 17.027 | 58.289 | 0.00 | 0.00 |
| ATOM | 2726 | HB2 | GLN | 177 | 62.492 | 18.091 | 58.282 | 0.00 | 0.00 |
| ATOM | 2727 | HB3 | GLN | 177 | 62.069 | 16.617 | 59.052 | 0.00 | 0.00 |
| ATOM | 2728 | CG  | GLN | 177 | 64.144 | 16.761 | 58.844 | 0.00 | 0.00 |
| ATOM | 2729 | HG2 | GLN | 177 | 64.820 | 17.434 | 58.317 | 0.00 | 0.00 |

|      |      |      |     |     |        |        |        |      |      |
|------|------|------|-----|-----|--------|--------|--------|------|------|
| ATOM | 2730 | HG3  | GLN | 177 | 64.238 | 17.067 | 59.886 | 0.00 | 0.00 |
| ATOM | 2731 | CD   | GLN | 177 | 64.616 | 15.308 | 58.779 | 0.00 | 0.00 |
| ATOM | 2732 | OE1  | GLN | 177 | 64.863 | 14.688 | 57.739 | 0.00 | 0.00 |
| ATOM | 2733 | NE2  | GLN | 177 | 64.586 | 14.560 | 59.846 | 0.00 | 0.00 |
| ATOM | 2734 | 1HE2 | GLN | 177 | 64.818 | 13.581 | 59.761 | 0.00 | 0.00 |
| ATOM | 2735 | 2HE2 | GLN | 177 | 64.674 | 15.044 | 60.728 | 0.00 | 0.00 |
| ATOM | 2736 | C    | GLN | 177 | 60.939 | 16.545 | 56.535 | 0.00 | 0.00 |
| ATOM | 2737 | O    | GLN | 177 | 60.659 | 17.322 | 55.564 | 0.00 | 0.00 |
| ATOM | 2738 | N    | LYS | 178 | 60.008 | 16.074 | 57.385 | 0.00 | 0.00 |
| ATOM | 2739 | H    | LYS | 178 | 60.428 | 15.681 | 58.215 | 0.00 | 0.00 |
| ATOM | 2740 | CA   | LYS | 178 | 58.524 | 16.084 | 57.255 | 0.00 | 0.00 |
| ATOM | 2741 | HA   | LYS | 178 | 58.201 | 16.702 | 56.417 | 0.00 | 0.00 |
| ATOM | 2742 | CB   | LYS | 178 | 58.153 | 14.644 | 56.902 | 0.00 | 0.00 |
| ATOM | 2743 | HB2  | LYS | 178 | 58.802 | 14.190 | 56.153 | 0.00 | 0.00 |
| ATOM | 2744 | HB3  | LYS | 178 | 58.189 | 13.981 | 57.766 | 0.00 | 0.00 |
| ATOM | 2745 | CG   | LYS | 178 | 56.699 | 14.629 | 56.301 | 0.00 | 0.00 |
| ATOM | 2746 | HG2  | LYS | 178 | 55.886 | 15.129 | 56.827 | 0.00 | 0.00 |
| ATOM | 2747 | HG3  | LYS | 178 | 56.781 | 15.176 | 55.362 | 0.00 | 0.00 |
| ATOM | 2748 | CD   | LYS | 178 | 56.272 | 13.175 | 56.033 | 0.00 | 0.00 |
| ATOM | 2749 | HD2  | LYS | 178 | 56.070 | 12.687 | 56.987 | 0.00 | 0.00 |
| ATOM | 2750 | HD3  | LYS | 178 | 55.352 | 13.281 | 55.459 | 0.00 | 0.00 |
| ATOM | 2751 | CE   | LYS | 178 | 57.099 | 12.185 | 55.180 | 0.00 | 0.00 |
| ATOM | 2752 | HE2  | LYS | 178 | 57.329 | 12.649 | 54.220 | 0.00 | 0.00 |
| ATOM | 2753 | HE3  | LYS | 178 | 58.068 | 12.017 | 55.648 | 0.00 | 0.00 |
| ATOM | 2754 | NZ   | LYS | 178 | 56.534 | 10.813 | 54.960 | 0.00 | 0.00 |
| ATOM | 2755 | HZ1  | LYS | 178 | 55.564 | 10.836 | 54.679 | 0.00 | 0.00 |

ATOM 2756 HZ2 LYS 178 57.014 10.288 54.243 0.00 0.00  
ATOM 2757 HZ3 LYS 178 56.646 10.327 55.838 0.00 0.00  
ATOM 2758 C LYS 178 57.735 16.641 58.442 0.00 0.00  
ATOM 2759 O LYS 178 57.888 16.080 59.570 0.00 0.00  
ATOM 2760 N ARG 179 56.816 17.582 58.314 0.00 0.00  
ATOM 2761 H ARG 179 56.736 18.074 57.435 0.00 0.00  
ATOM 2762 CA ARG 179 55.906 18.057 59.449 0.00 0.00  
ATOM 2763 HA ARG 179 55.652 17.091 59.886 0.00 0.00  
ATOM 2764 CB ARG 179 56.484 19.020 60.451 0.00 0.00  
ATOM 2765 HB2 ARG 179 55.695 19.049 61.203 0.00 0.00  
ATOM 2766 HB3 ARG 179 57.335 18.565 60.958 0.00 0.00  
ATOM 2767 CG ARG 179 56.836 20.436 59.892 0.00 0.00  
ATOM 2768 HG2 ARG 179 57.368 20.379 58.942 0.00 0.00  
ATOM 2769 HG3 ARG 179 55.912 20.993 59.740 0.00 0.00  
ATOM 2770 CD ARG 179 57.572 21.320 60.855 0.00 0.00  
ATOM 2771 HD2 ARG 179 58.537 20.880 61.106 0.00 0.00  
ATOM 2772 HD3 ARG 179 57.755 22.275 60.361 0.00 0.00  
ATOM 2773 NE ARG 179 56.774 21.595 62.070 0.00 0.00  
ATOM 2774 HE ARG 179 55.899 21.098 62.151 0.00 0.00  
ATOM 2775 CZ ARG 179 57.214 22.346 63.080 0.00 0.00  
ATOM 2776 NH1 ARG 179 56.534 22.387 64.206 0.00 0.00  
ATOM 2777 1HH1 ARG 179 56.666 23.207 64.781 0.00 0.00  
ATOM 2778 2HH1 ARG 179 55.687 21.851 64.334 0.00 0.00  
ATOM 2779 NH2 ARG 179 58.297 23.092 62.955 0.00 0.00  
ATOM 2780 1HH2 ARG 179 58.724 23.661 63.671 0.00 0.00  
ATOM 2781 2HH2 ARG 179 58.905 23.052 62.150 0.00 0.00

|      |      |      |     |     |        |        |        |      |      |
|------|------|------|-----|-----|--------|--------|--------|------|------|
| ATOM | 2782 | C    | ARG | 179 | 54.518 | 18.486 | 58.977 | 0.00 | 0.00 |
| ATOM | 2783 | O    | ARG | 179 | 54.455 | 19.206 | 58.023 | 0.00 | 0.00 |
| ATOM | 2784 | N    | GLU | 180 | 53.498 | 18.156 | 59.723 | 0.00 | 0.00 |
| ATOM | 2785 | H    | GLU | 180 | 53.611 | 17.501 | 60.484 | 0.00 | 0.00 |
| ATOM | 2786 | CA   | GLU | 180 | 52.094 | 18.487 | 59.459 | 0.00 | 0.00 |
| ATOM | 2787 | HA   | GLU | 180 | 52.064 | 18.676 | 58.386 | 0.00 | 0.00 |
| ATOM | 2788 | CB   | GLU | 180 | 51.251 | 17.366 | 59.925 | 0.00 | 0.00 |
| ATOM | 2789 | HB2  | GLU | 180 | 51.423 | 16.464 | 59.337 | 0.00 | 0.00 |
| ATOM | 2790 | HB3  | GLU | 180 | 51.455 | 16.969 | 60.920 | 0.00 | 0.00 |
| ATOM | 2791 | CG   | GLU | 180 | 49.742 | 17.554 | 59.771 | 0.00 | 0.00 |
| ATOM | 2792 | HG2  | GLU | 180 | 49.459 | 18.450 | 60.323 | 0.00 | 0.00 |
| ATOM | 2793 | HG3  | GLU | 180 | 49.568 | 17.682 | 58.703 | 0.00 | 0.00 |
| ATOM | 2794 | CD   | GLU | 180 | 49.026 | 16.449 | 60.510 | 0.00 | 0.00 |
| ATOM | 2795 | OE1  | GLU | 180 | 48.616 | 15.460 | 59.900 | 0.00 | 0.00 |
| ATOM | 2796 | OE2  | GLU | 180 | 48.801 | 16.612 | 61.722 | 0.00 | 0.00 |
| ATOM | 2797 | C    | GLU | 180 | 51.863 | 19.733 | 60.260 | 0.00 | 0.00 |
| ATOM | 2798 | O    | GLU | 180 | 52.279 | 19.865 | 61.402 | 0.00 | 0.00 |
| ATOM | 2799 | N    | VAL | 181 | 51.064 | 20.572 | 59.636 | 0.00 | 0.00 |
| ATOM | 2800 | H    | VAL | 181 | 50.679 | 20.447 | 58.711 | 0.00 | 0.00 |
| ATOM | 2801 | CA   | VAL | 181 | 50.618 | 21.883 | 60.123 | 0.00 | 0.00 |
| ATOM | 2802 | HA   | VAL | 181 | 50.831 | 21.932 | 61.191 | 0.00 | 0.00 |
| ATOM | 2803 | CB   | VAL | 181 | 51.358 | 23.106 | 59.548 | 0.00 | 0.00 |
| ATOM | 2804 | HB   | VAL | 181 | 50.837 | 23.983 | 59.931 | 0.00 | 0.00 |
| ATOM | 2805 | CG1  | VAL | 181 | 52.878 | 23.074 | 59.892 | 0.00 | 0.00 |
| ATOM | 2806 | 1HG1 | VAL | 181 | 53.393 | 23.931 | 59.459 | 0.00 | 0.00 |
| ATOM | 2807 | 2HG1 | VAL | 181 | 52.818 | 23.173 | 60.976 | 0.00 | 0.00 |

|      |      |      |     |     |        |        |        |      |      |
|------|------|------|-----|-----|--------|--------|--------|------|------|
| ATOM | 2808 | 3HG1 | VAL | 181 | 53.369 | 22.159 | 59.560 | 0.00 | 0.00 |
| ATOM | 2809 | CG2  | VAL | 181 | 51.364 | 23.200 | 58.069 | 0.00 | 0.00 |
| ATOM | 2810 | 1HG2 | VAL | 181 | 51.705 | 24.210 | 57.840 | 0.00 | 0.00 |
| ATOM | 2811 | 2HG2 | VAL | 181 | 52.033 | 22.392 | 57.773 | 0.00 | 0.00 |
| ATOM | 2812 | 3HG2 | VAL | 181 | 50.338 | 23.185 | 57.701 | 0.00 | 0.00 |
| ATOM | 2813 | C    | VAL | 181 | 49.091 | 22.018 | 59.883 | 0.00 | 0.00 |
| ATOM | 2814 | O    | VAL | 181 | 48.534 | 21.504 | 58.927 | 0.00 | 0.00 |
| ATOM | 2815 | N    | GLU | 182 | 48.465 | 22.659 | 60.885 | 0.00 | 0.00 |
| ATOM | 2816 | H    | GLU | 182 | 48.968 | 22.964 | 61.706 | 0.00 | 0.00 |
| ATOM | 2817 | CA   | GLU | 182 | 47.101 | 23.216 | 60.793 | 0.00 | 0.00 |
| ATOM | 2818 | HA   | GLU | 182 | 46.554 | 22.590 | 60.088 | 0.00 | 0.00 |
| ATOM | 2819 | CB   | GLU | 182 | 46.461 | 22.979 | 62.164 | 0.00 | 0.00 |
| ATOM | 2820 | HB2  | GLU | 182 | 46.843 | 22.048 | 62.584 | 0.00 | 0.00 |
| ATOM | 2821 | HB3  | GLU | 182 | 46.673 | 23.877 | 62.744 | 0.00 | 0.00 |
| ATOM | 2822 | CG   | GLU | 182 | 44.974 | 22.780 | 61.883 | 0.00 | 0.00 |
| ATOM | 2823 | HG2  | GLU | 182 | 44.576 | 23.671 | 61.398 | 0.00 | 0.00 |
| ATOM | 2824 | HG3  | GLU | 182 | 44.787 | 21.911 | 61.252 | 0.00 | 0.00 |
| ATOM | 2825 | CD   | GLU | 182 | 44.184 | 22.600 | 63.242 | 0.00 | 0.00 |
| ATOM | 2826 | OE1  | GLU | 182 | 44.245 | 23.514 | 64.166 | 0.00 | 0.00 |
| ATOM | 2827 | OE2  | GLU | 182 | 43.389 | 21.654 | 63.376 | 0.00 | 0.00 |
| ATOM | 2828 | C    | GLU | 182 | 47.107 | 24.656 | 60.233 | 0.00 | 0.00 |
| ATOM | 2829 | O    | GLU | 182 | 47.957 | 25.491 | 60.616 | 0.00 | 0.00 |
| ATOM | 2830 | N    | LEU | 183 | 46.185 | 24.951 | 59.333 | 0.00 | 0.00 |
| ATOM | 2831 | H    | LEU | 183 | 45.493 | 24.229 | 59.191 | 0.00 | 0.00 |
| ATOM | 2832 | CA   | LEU | 183 | 45.948 | 26.171 | 58.622 | 0.00 | 0.00 |
| ATOM | 2833 | HA   | LEU | 183 | 46.792 | 26.796 | 58.911 | 0.00 | 0.00 |



|      |      |      |     |     |        |        |        |      |      |
|------|------|------|-----|-----|--------|--------|--------|------|------|
| ATOM | 2834 | CB   | LEU | 183 | 46.094 | 25.971 | 57.077 | 0.00 | 0.00 |
| ATOM | 2835 | HB2  | LEU | 183 | 45.286 | 25.305 | 56.774 | 0.00 | 0.00 |
| ATOM | 2836 | HB3  | LEU | 183 | 45.908 | 26.936 | 56.605 | 0.00 | 0.00 |
| ATOM | 2837 | CG   | LEU | 183 | 47.406 | 25.368 | 56.504 | 0.00 | 0.00 |
| ATOM | 2838 | HG   | LEU | 183 | 47.523 | 24.364 | 56.913 | 0.00 | 0.00 |
| ATOM | 2839 | CD1  | LEU | 183 | 47.388 | 25.466 | 54.978 | 0.00 | 0.00 |
| ATOM | 2840 | 1HD1 | LEU | 183 | 48.352 | 25.193 | 54.551 | 0.00 | 0.00 |
| ATOM | 2841 | 2HD1 | LEU | 183 | 46.650 | 24.777 | 54.567 | 0.00 | 0.00 |
| ATOM | 2842 | 3HD1 | LEU | 183 | 47.219 | 26.508 | 54.705 | 0.00 | 0.00 |
| ATOM | 2843 | CD2  | LEU | 183 | 48.656 | 26.136 | 56.932 | 0.00 | 0.00 |
| ATOM | 2844 | 1HD2 | LEU | 183 | 49.546 | 26.048 | 56.310 | 0.00 | 0.00 |
| ATOM | 2845 | 2HD2 | LEU | 183 | 48.375 | 27.178 | 57.090 | 0.00 | 0.00 |
| ATOM | 2846 | 3HD2 | LEU | 183 | 48.887 | 25.822 | 57.950 | 0.00 | 0.00 |
| ATOM | 2847 | C    | LEU | 183 | 44.686 | 26.759 | 59.025 | 0.00 | 0.00 |
| ATOM | 2848 | O    | LEU | 183 | 43.830 | 26.130 | 59.628 | 0.00 | 0.00 |
| ATOM | 2849 | N    | VAL | 184 | 44.439 | 28.052 | 58.678 | 0.00 | 0.00 |
| ATOM | 2850 | H    | VAL | 184 | 45.139 | 28.395 | 58.037 | 0.00 | 0.00 |
| ATOM | 2851 | CA   | VAL | 184 | 43.230 | 28.841 | 59.036 | 0.00 | 0.00 |
| ATOM | 2852 | HA   | VAL | 184 | 42.434 | 28.097 | 59.069 | 0.00 | 0.00 |
| ATOM | 2853 | CB   | VAL | 184 | 43.306 | 29.557 | 60.408 | 0.00 | 0.00 |
| ATOM | 2854 | HB   | VAL | 184 | 43.354 | 28.868 | 61.252 | 0.00 | 0.00 |
| ATOM | 2855 | CG1  | VAL | 184 | 44.333 | 30.723 | 60.592 | 0.00 | 0.00 |
| ATOM | 2856 | 1HG1 | VAL | 184 | 44.064 | 31.399 | 59.780 | 0.00 | 0.00 |
| ATOM | 2857 | 2HG1 | VAL | 184 | 44.220 | 31.167 | 61.581 | 0.00 | 0.00 |
| ATOM | 2858 | 3HG1 | VAL | 184 | 45.308 | 30.251 | 60.472 | 0.00 | 0.00 |
| ATOM | 2859 | CG2  | VAL | 184 | 41.887 | 30.144 | 60.638 | 0.00 | 0.00 |

|      |      |      |     |     |        |        |        |      |      |
|------|------|------|-----|-----|--------|--------|--------|------|------|
| ATOM | 2860 | 1HG2 | VAL | 184 | 41.098 | 29.406 | 60.496 | 0.00 | 0.00 |
| ATOM | 2861 | 2HG2 | VAL | 184 | 42.038 | 30.519 | 61.650 | 0.00 | 0.00 |
| ATOM | 2862 | 3HG2 | VAL | 184 | 41.637 | 31.023 | 60.043 | 0.00 | 0.00 |
| ATOM | 2863 | C    | VAL | 184 | 42.823 | 29.789 | 57.839 | 0.00 | 0.00 |
| ATOM | 2864 | O    | VAL | 184 | 43.683 | 30.400 | 57.147 | 0.00 | 0.00 |
| ATOM | 2865 | N    | ALA | 185 | 41.537 | 30.020 | 57.535 | 0.00 | 0.00 |
| ATOM | 2866 | H    | ALA | 185 | 40.793 | 29.505 | 57.983 | 0.00 | 0.00 |
| ATOM | 2867 | CA   | ALA | 185 | 41.114 | 30.746 | 56.415 | 0.00 | 0.00 |
| ATOM | 2868 | HA   | ALA | 185 | 41.628 | 30.430 | 55.507 | 0.00 | 0.00 |
| ATOM | 2869 | CB   | ALA | 185 | 39.587 | 30.465 | 56.207 | 0.00 | 0.00 |
| ATOM | 2870 | HB1  | ALA | 185 | 39.060 | 30.800 | 57.100 | 0.00 | 0.00 |
| ATOM | 2871 | HB2  | ALA | 185 | 39.173 | 30.988 | 55.345 | 0.00 | 0.00 |
| ATOM | 2872 | HB3  | ALA | 185 | 39.439 | 29.388 | 56.139 | 0.00 | 0.00 |
| ATOM | 2873 | C    | ALA | 185 | 41.446 | 32.245 | 56.618 | 0.00 | 0.00 |
| ATOM | 2874 | O    | ALA | 185 | 41.571 | 32.849 | 57.702 | 0.00 | 0.00 |
| ATOM | 2875 | N    | PHE | 186 | 41.304 | 32.959 | 55.538 | 0.00 | 0.00 |
| ATOM | 2876 | H    | PHE | 186 | 41.128 | 32.549 | 54.632 | 0.00 | 0.00 |
| ATOM | 2877 | CA   | PHE | 186 | 41.109 | 34.424 | 55.645 | 0.00 | 0.00 |
| ATOM | 2878 | HA   | PHE | 186 | 41.704 | 34.791 | 56.481 | 0.00 | 0.00 |
| ATOM | 2879 | CB   | PHE | 186 | 41.506 | 35.211 | 54.332 | 0.00 | 0.00 |
| ATOM | 2880 | HB2  | PHE | 186 | 40.821 | 34.985 | 53.515 | 0.00 | 0.00 |
| ATOM | 2881 | HB3  | PHE | 186 | 41.594 | 36.276 | 54.550 | 0.00 | 0.00 |
| ATOM | 2882 | CG   | PHE | 186 | 42.924 | 34.905 | 53.944 | 0.00 | 0.00 |
| ATOM | 2883 | CD1  | PHE | 186 | 43.238 | 34.287 | 52.659 | 0.00 | 0.00 |
| ATOM | 2884 | HD1  | PHE | 186 | 42.451 | 34.212 | 51.923 | 0.00 | 0.00 |
| ATOM | 2885 | CE1  | PHE | 186 | 44.601 | 33.909 | 52.349 | 0.00 | 0.00 |

|      |      |     |     |     |        |        |        |      |      |
|------|------|-----|-----|-----|--------|--------|--------|------|------|
| ATOM | 2886 | HE1 | PHE | 186 | 44.856 | 33.469 | 51.396 | 0.00 | 0.00 |
| ATOM | 2887 | CZ  | PHE | 186 | 45.622 | 34.052 | 53.305 | 0.00 | 0.00 |
| ATOM | 2888 | HZ  | PHE | 186 | 46.679 | 33.887 | 53.156 | 0.00 | 0.00 |
| ATOM | 2889 | CE2 | PHE | 186 | 45.273 | 34.553 | 54.630 | 0.00 | 0.00 |
| ATOM | 2890 | HE2 | PHE | 186 | 46.068 | 34.768 | 55.329 | 0.00 | 0.00 |
| ATOM | 2891 | CD2 | PHE | 186 | 43.952 | 34.929 | 54.912 | 0.00 | 0.00 |
| ATOM | 2892 | HD2 | PHE | 186 | 43.735 | 35.388 | 55.866 | 0.00 | 0.00 |
| ATOM | 2893 | C   | PHE | 186 | 39.603 | 34.997 | 56.032 | 0.00 | 0.00 |
| ATOM | 2894 | O   | PHE | 186 | 38.543 | 34.392 | 55.773 | 0.00 | 0.00 |
| ATOM | 2895 | N   | ALA | 187 | 39.701 | 36.210 | 56.644 | 0.00 | 0.00 |
| ATOM | 2896 | H   | ALA | 187 | 40.559 | 36.718 | 56.803 | 0.00 | 0.00 |
| ATOM | 2897 | CA  | ALA | 187 | 38.535 | 37.085 | 56.925 | 0.00 | 0.00 |
| ATOM | 2898 | HA  | ALA | 187 | 37.721 | 36.594 | 56.392 | 0.00 | 0.00 |
| ATOM | 2899 | CB  | ALA | 187 | 38.244 | 37.136 | 58.452 | 0.00 | 0.00 |
| ATOM | 2900 | HB1 | ALA | 187 | 37.445 | 37.835 | 58.702 | 0.00 | 0.00 |
| ATOM | 2901 | HB2 | ALA | 187 | 38.008 | 36.134 | 58.810 | 0.00 | 0.00 |
| ATOM | 2902 | HB3 | ALA | 187 | 39.187 | 37.426 | 58.916 | 0.00 | 0.00 |
| ATOM | 2903 | C   | ALA | 187 | 38.806 | 38.539 | 56.372 | 0.00 | 0.00 |
| ATOM | 2904 | O   | ALA | 187 | 39.642 | 38.677 | 55.450 | 0.00 | 0.00 |
| ATOM | 2905 | N   | GLY | 188 | 38.095 | 39.529 | 56.845 | 0.00 | 0.00 |
| ATOM | 2906 | H   | GLY | 188 | 37.300 | 39.295 | 57.423 | 0.00 | 0.00 |
| ATOM | 2907 | CA  | GLY | 188 | 38.009 | 40.874 | 56.231 | 0.00 | 0.00 |
| ATOM | 2908 | HA2 | GLY | 188 | 37.381 | 41.474 | 56.889 | 0.00 | 0.00 |
| ATOM | 2909 | HA3 | GLY | 188 | 39.018 | 41.281 | 56.164 | 0.00 | 0.00 |
| ATOM | 2910 | C   | GLY | 188 | 37.377 | 40.896 | 54.826 | 0.00 | 0.00 |
| ATOM | 2911 | O   | GLY | 188 | 36.398 | 40.166 | 54.636 | 0.00 | 0.00 |

|      |      |     |     |     |        |        |        |      |      |
|------|------|-----|-----|-----|--------|--------|--------|------|------|
| ATOM | 2912 | N   | HIE | 189 | 37.994 | 41.636 | 53.871 | 0.00 | 0.00 |
| ATOM | 2913 | H   | HIE | 189 | 38.876 | 42.057 | 54.126 | 0.00 | 0.00 |
| ATOM | 2914 | CA  | HIE | 189 | 37.526 | 41.544 | 52.466 | 0.00 | 0.00 |
| ATOM | 2915 | HA  | HIE | 189 | 36.448 | 41.383 | 52.454 | 0.00 | 0.00 |
| ATOM | 2916 | CB  | HIE | 189 | 37.561 | 42.899 | 51.859 | 0.00 | 0.00 |
| ATOM | 2917 | HB2 | HIE | 189 | 37.145 | 43.640 | 52.542 | 0.00 | 0.00 |
| ATOM | 2918 | HB3 | HIE | 189 | 38.634 | 43.057 | 51.749 | 0.00 | 0.00 |
| ATOM | 2919 | CG  | HIE | 189 | 36.917 | 43.058 | 50.460 | 0.00 | 0.00 |
| ATOM | 2920 | ND1 | HIE | 189 | 35.587 | 43.143 | 50.201 | 0.00 | 0.00 |
| ATOM | 2921 | CE1 | HIE | 189 | 35.423 | 43.270 | 48.830 | 0.00 | 0.00 |
| ATOM | 2922 | HE1 | HIE | 189 | 34.464 | 43.314 | 48.335 | 0.00 | 0.00 |
| ATOM | 2923 | NE2 | HIE | 189 | 36.679 | 43.424 | 48.323 | 0.00 | 0.00 |
| ATOM | 2924 | HE2 | HIE | 189 | 36.937 | 43.723 | 47.393 | 0.00 | 0.00 |
| ATOM | 2925 | CD2 | HIE | 189 | 37.581 | 43.357 | 49.298 | 0.00 | 0.00 |
| ATOM | 2926 | HD2 | HIE | 189 | 38.649 | 43.504 | 49.231 | 0.00 | 0.00 |
| ATOM | 2927 | C   | HIE | 189 | 37.953 | 40.373 | 51.604 | 0.00 | 0.00 |
| ATOM | 2928 | O   | HIE | 189 | 37.575 | 40.226 | 50.469 | 0.00 | 0.00 |
| ATOM | 2929 | N   | ARG | 190 | 38.499 | 39.431 | 52.263 | 0.00 | 0.00 |
| ATOM | 2930 | H   | ARG | 190 | 38.737 | 39.634 | 53.223 | 0.00 | 0.00 |
| ATOM | 2931 | CA  | ARG | 190 | 39.050 | 38.084 | 51.919 | 0.00 | 0.00 |
| ATOM | 2932 | HA  | ARG | 190 | 39.812 | 37.782 | 52.637 | 0.00 | 0.00 |
| ATOM | 2933 | CB  | ARG | 190 | 37.837 | 37.111 | 51.874 | 0.00 | 0.00 |
| ATOM | 2934 | HB2 | ARG | 190 | 37.123 | 37.570 | 51.190 | 0.00 | 0.00 |
| ATOM | 2935 | HB3 | ARG | 190 | 38.135 | 36.120 | 51.532 | 0.00 | 0.00 |
| ATOM | 2936 | CG  | ARG | 190 | 37.194 | 36.808 | 53.295 | 0.00 | 0.00 |
| ATOM | 2937 | HG2 | ARG | 190 | 37.900 | 36.269 | 53.927 | 0.00 | 0.00 |

|      |      |      |     |     |        |        |        |      |      |
|------|------|------|-----|-----|--------|--------|--------|------|------|
| ATOM | 2938 | HG3  | ARG | 190 | 37.069 | 37.713 | 53.889 | 0.00 | 0.00 |
| ATOM | 2939 | CD   | ARG | 190 | 35.922 | 35.913 | 53.157 | 0.00 | 0.00 |
| ATOM | 2940 | HD2  | ARG | 190 | 35.255 | 36.342 | 52.409 | 0.00 | 0.00 |
| ATOM | 2941 | HD3  | ARG | 190 | 36.243 | 34.949 | 52.762 | 0.00 | 0.00 |
| ATOM | 2942 | NE   | ARG | 190 | 35.202 | 35.613 | 54.414 | 0.00 | 0.00 |
| ATOM | 2943 | HE   | ARG | 190 | 34.896 | 36.429 | 54.924 | 0.00 | 0.00 |
| ATOM | 2944 | CZ   | ARG | 190 | 34.969 | 34.462 | 55.022 | 0.00 | 0.00 |
| ATOM | 2945 | NH1  | ARG | 190 | 35.327 | 33.389 | 54.450 | 0.00 | 0.00 |
| ATOM | 2946 | 1HH1 | ARG | 190 | 35.205 | 32.558 | 55.010 | 0.00 | 0.00 |
| ATOM | 2947 | 2HH1 | ARG | 190 | 35.474 | 33.312 | 53.454 | 0.00 | 0.00 |
| ATOM | 2948 | NH2  | ARG | 190 | 34.310 | 34.419 | 56.162 | 0.00 | 0.00 |
| ATOM | 2949 | 1HH2 | ARG | 190 | 33.933 | 33.561 | 56.541 | 0.00 | 0.00 |
| ATOM | 2950 | 2HH2 | ARG | 190 | 34.264 | 35.253 | 56.730 | 0.00 | 0.00 |
| ATOM | 2951 | C    | ARG | 190 | 39.756 | 37.994 | 50.551 | 0.00 | 0.00 |
| ATOM | 2952 | O    | ARG | 190 | 39.576 | 37.028 | 49.786 | 0.00 | 0.00 |
| ATOM | 2953 | N    | ALA | 191 | 40.528 | 38.964 | 50.185 | 0.00 | 0.00 |
| ATOM | 2954 | H    | ALA | 191 | 40.803 | 39.709 | 50.809 | 0.00 | 0.00 |
| ATOM | 2955 | CA   | ALA | 191 | 41.047 | 38.907 | 48.820 | 0.00 | 0.00 |
| ATOM | 2956 | HA   | ALA | 191 | 40.343 | 38.682 | 48.019 | 0.00 | 0.00 |
| ATOM | 2957 | CB   | ALA | 191 | 41.568 | 40.293 | 48.499 | 0.00 | 0.00 |
| ATOM | 2958 | HB1  | ALA | 191 | 42.133 | 40.279 | 47.567 | 0.00 | 0.00 |
| ATOM | 2959 | HB2  | ALA | 191 | 40.800 | 41.060 | 48.395 | 0.00 | 0.00 |
| ATOM | 2960 | HB3  | ALA | 191 | 42.217 | 40.583 | 49.326 | 0.00 | 0.00 |
| ATOM | 2961 | C    | ALA | 191 | 42.163 | 37.884 | 48.732 | 0.00 | 0.00 |
| ATOM | 2962 | O    | ALA | 191 | 43.211 | 37.971 | 49.440 | 0.00 | 0.00 |
| ATOM | 2963 | N    | VAL | 192 | 42.004 | 36.837 | 47.932 | 0.00 | 0.00 |

|      |      |      |     |     |        |        |        |      |      |
|------|------|------|-----|-----|--------|--------|--------|------|------|
| ATOM | 2964 | H    | VAL | 192 | 41.064 | 36.802 | 47.564 | 0.00 | 0.00 |
| ATOM | 2965 | CA   | VAL | 192 | 43.026 | 35.790 | 47.793 | 0.00 | 0.00 |
| ATOM | 2966 | HA   | VAL | 192 | 43.297 | 35.397 | 48.773 | 0.00 | 0.00 |
| ATOM | 2967 | CB   | VAL | 192 | 42.440 | 34.550 | 47.072 | 0.00 | 0.00 |
| ATOM | 2968 | HB   | VAL | 192 | 43.162 | 33.740 | 46.969 | 0.00 | 0.00 |
| ATOM | 2969 | CG1  | VAL | 192 | 41.351 | 33.961 | 47.961 | 0.00 | 0.00 |
| ATOM | 2970 | 1HG1 | VAL | 192 | 41.028 | 33.024 | 47.506 | 0.00 | 0.00 |
| ATOM | 2971 | 2HG1 | VAL | 192 | 41.784 | 33.773 | 48.944 | 0.00 | 0.00 |
| ATOM | 2972 | 3HG1 | VAL | 192 | 40.407 | 34.503 | 48.023 | 0.00 | 0.00 |
| ATOM | 2973 | CG2  | VAL | 192 | 41.810 | 34.727 | 45.652 | 0.00 | 0.00 |
| ATOM | 2974 | 1HG2 | VAL | 192 | 42.639 | 35.065 | 45.031 | 0.00 | 0.00 |
| ATOM | 2975 | 2HG2 | VAL | 192 | 41.397 | 33.799 | 45.257 | 0.00 | 0.00 |
| ATOM | 2976 | 3HG2 | VAL | 192 | 40.934 | 35.369 | 45.750 | 0.00 | 0.00 |
| ATOM | 2977 | C    | VAL | 192 | 44.309 | 36.299 | 47.047 | 0.00 | 0.00 |
| ATOM | 2978 | O    | VAL | 192 | 45.328 | 35.693 | 47.266 | 0.00 | 0.00 |
| ATOM | 2979 | N    | PHE | 193 | 44.310 | 37.307 | 46.171 | 0.00 | 0.00 |
| ATOM | 2980 | H    | PHE | 193 | 43.441 | 37.815 | 46.088 | 0.00 | 0.00 |
| ATOM | 2981 | CA   | PHE | 193 | 45.469 | 37.881 | 45.502 | 0.00 | 0.00 |
| ATOM | 2982 | HA   | PHE | 193 | 46.254 | 37.126 | 45.469 | 0.00 | 0.00 |
| ATOM | 2983 | CB   | PHE | 193 | 45.035 | 38.254 | 44.101 | 0.00 | 0.00 |
| ATOM | 2984 | HB2  | PHE | 193 | 44.784 | 39.312 | 44.172 | 0.00 | 0.00 |
| ATOM | 2985 | HB3  | PHE | 193 | 45.921 | 38.216 | 43.468 | 0.00 | 0.00 |
| ATOM | 2986 | CG   | PHE | 193 | 43.839 | 37.530 | 43.511 | 0.00 | 0.00 |
| ATOM | 2987 | CD1  | PHE | 193 | 42.636 | 38.282 | 43.230 | 0.00 | 0.00 |
| ATOM | 2988 | HD1  | PHE | 193 | 42.584 | 39.348 | 43.394 | 0.00 | 0.00 |
| ATOM | 2989 | CE1  | PHE | 193 | 41.587 | 37.665 | 42.658 | 0.00 | 0.00 |

|      |      |     |     |     |        |        |        |      |      |
|------|------|-----|-----|-----|--------|--------|--------|------|------|
| ATOM | 2990 | HE1 | PHE | 193 | 40.658 | 38.190 | 42.491 | 0.00 | 0.00 |
| ATOM | 2991 | CZ  | PHE | 193 | 41.666 | 36.297 | 42.407 | 0.00 | 0.00 |
| ATOM | 2992 | HZ  | PHE | 193 | 40.854 | 35.750 | 41.952 | 0.00 | 0.00 |
| ATOM | 2993 | CE2 | PHE | 193 | 42.857 | 35.545 | 42.495 | 0.00 | 0.00 |
| ATOM | 2994 | HE2 | PHE | 193 | 42.926 | 34.561 | 42.054 | 0.00 | 0.00 |
| ATOM | 2995 | CD2 | PHE | 193 | 43.889 | 36.144 | 43.206 | 0.00 | 0.00 |
| ATOM | 2996 | HD2 | PHE | 193 | 44.774 | 35.608 | 43.515 | 0.00 | 0.00 |
| ATOM | 2997 | C   | PHE | 193 | 45.969 | 39.121 | 46.307 | 0.00 | 0.00 |
| ATOM | 2998 | O   | PHE | 193 | 45.107 | 39.783 | 46.767 | 0.00 | 0.00 |
| ATOM | 2999 | N   | GLY | 194 | 47.288 | 39.414 | 46.421 | 0.00 | 0.00 |
| ATOM | 3000 | H   | GLY | 194 | 47.875 | 38.760 | 45.923 | 0.00 | 0.00 |
| ATOM | 3001 | CA  | GLY | 194 | 48.021 | 40.297 | 47.351 | 0.00 | 0.00 |
| ATOM | 3002 | HA2 | GLY | 194 | 48.229 | 41.298 | 46.973 | 0.00 | 0.00 |
| ATOM | 3003 | HA3 | GLY | 194 | 47.342 | 40.522 | 48.174 | 0.00 | 0.00 |
| ATOM | 3004 | C   | GLY | 194 | 49.392 | 39.754 | 47.832 | 0.00 | 0.00 |
| ATOM | 3005 | O   | GLY | 194 | 50.226 | 40.589 | 48.166 | 0.00 | 0.00 |
| ATOM | 3006 | N   | PHE | 195 | 49.635 | 38.442 | 47.791 | 0.00 | 0.00 |
| ATOM | 3007 | H   | PHE | 195 | 48.829 | 37.861 | 47.608 | 0.00 | 0.00 |
| ATOM | 3008 | CA  | PHE | 195 | 50.766 | 37.714 | 48.391 | 0.00 | 0.00 |
| ATOM | 3009 | HA  | PHE | 195 | 51.174 | 38.312 | 49.206 | 0.00 | 0.00 |
| ATOM | 3010 | CB  | PHE | 195 | 50.200 | 36.520 | 48.981 | 0.00 | 0.00 |
| ATOM | 3011 | HB2 | PHE | 195 | 49.925 | 35.755 | 48.256 | 0.00 | 0.00 |
| ATOM | 3012 | HB3 | PHE | 195 | 51.010 | 35.983 | 49.475 | 0.00 | 0.00 |
| ATOM | 3013 | CG  | PHE | 195 | 49.063 | 36.729 | 50.014 | 0.00 | 0.00 |
| ATOM | 3014 | CD1 | PHE | 195 | 47.694 | 36.594 | 49.756 | 0.00 | 0.00 |
| ATOM | 3015 | HD1 | PHE | 195 | 47.259 | 36.446 | 48.778 | 0.00 | 0.00 |

|      |      |     |     |     |        |        |        |      |      |
|------|------|-----|-----|-----|--------|--------|--------|------|------|
| ATOM | 3016 | CE1 | PHE | 195 | 46.799 | 36.819 | 50.764 | 0.00 | 0.00 |
| ATOM | 3017 | HE1 | PHE | 195 | 45.772 | 36.643 | 50.482 | 0.00 | 0.00 |
| ATOM | 3018 | CZ  | PHE | 195 | 47.220 | 37.204 | 52.096 | 0.00 | 0.00 |
| ATOM | 3019 | HZ  | PHE | 195 | 46.559 | 37.267 | 52.948 | 0.00 | 0.00 |
| ATOM | 3020 | CE2 | PHE | 195 | 48.588 | 37.335 | 52.330 | 0.00 | 0.00 |
| ATOM | 3021 | HE2 | PHE | 195 | 48.876 | 37.433 | 53.366 | 0.00 | 0.00 |
| ATOM | 3022 | CD2 | PHE | 195 | 49.514 | 36.988 | 51.342 | 0.00 | 0.00 |
| ATOM | 3023 | HD2 | PHE | 195 | 50.555 | 36.867 | 51.605 | 0.00 | 0.00 |
| ATOM | 3024 | C   | PHE | 195 | 51.991 | 37.421 | 47.512 | 0.00 | 0.00 |
| ATOM | 3025 | O   | PHE | 195 | 53.178 | 37.379 | 47.981 | 0.00 | 0.00 |
| ATOM | 3026 | N   | ARG | 196 | 51.766 | 37.331 | 46.196 | 0.00 | 0.00 |
| ATOM | 3027 | H   | ARG | 196 | 50.811 | 37.463 | 45.893 | 0.00 | 0.00 |
| ATOM | 3028 | CA  | ARG | 196 | 52.812 | 37.157 | 45.193 | 0.00 | 0.00 |
| ATOM | 3029 | HA  | ARG | 196 | 53.688 | 37.744 | 45.469 | 0.00 | 0.00 |
| ATOM | 3030 | CB  | ARG | 196 | 53.217 | 35.642 | 45.093 | 0.00 | 0.00 |
| ATOM | 3031 | HB2 | ARG | 196 | 53.437 | 35.144 | 46.038 | 0.00 | 0.00 |
| ATOM | 3032 | HB3 | ARG | 196 | 52.514 | 35.136 | 44.431 | 0.00 | 0.00 |
| ATOM | 3033 | CG  | ARG | 196 | 54.586 | 35.543 | 44.385 | 0.00 | 0.00 |
| ATOM | 3034 | HG2 | ARG | 196 | 54.573 | 36.108 | 43.453 | 0.00 | 0.00 |
| ATOM | 3035 | HG3 | ARG | 196 | 55.416 | 35.869 | 45.012 | 0.00 | 0.00 |
| ATOM | 3036 | CD  | ARG | 196 | 54.948 | 34.039 | 44.130 | 0.00 | 0.00 |
| ATOM | 3037 | HD2 | ARG | 196 | 55.073 | 33.564 | 45.103 | 0.00 | 0.00 |
| ATOM | 3038 | HD3 | ARG | 196 | 54.073 | 33.553 | 43.698 | 0.00 | 0.00 |
| ATOM | 3039 | NE  | ARG | 196 | 56.129 | 33.969 | 43.204 | 0.00 | 0.00 |
| ATOM | 3040 | HE  | ARG | 196 | 56.050 | 34.053 | 42.201 | 0.00 | 0.00 |
| ATOM | 3041 | CZ  | ARG | 196 | 57.386 | 33.657 | 43.635 | 0.00 | 0.00 |



|      |      |      |     |     |        |        |        |      |      |
|------|------|------|-----|-----|--------|--------|--------|------|------|
| ATOM | 3042 | NH1  | ARG | 196 | 58.257 | 33.502 | 42.674 | 0.00 | 0.00 |
| ATOM | 3043 | 1HH1 | ARG | 196 | 59.242 | 33.457 | 42.892 | 0.00 | 0.00 |
| ATOM | 3044 | 2HH1 | ARG | 196 | 57.915 | 33.698 | 41.744 | 0.00 | 0.00 |
| ATOM | 3045 | NH2  | ARG | 196 | 57.861 | 33.616 | 44.831 | 0.00 | 0.00 |
| ATOM | 3046 | 1HH2 | ARG | 196 | 58.808 | 33.294 | 44.971 | 0.00 | 0.00 |
| ATOM | 3047 | 2HH2 | ARG | 196 | 57.233 | 33.563 | 45.620 | 0.00 | 0.00 |
| ATOM | 3048 | C    | ARG | 196 | 52.350 | 37.567 | 43.817 | 0.00 | 0.00 |
| ATOM | 3049 | O    | ARG | 196 | 53.168 | 38.027 | 43.080 | 0.00 | 0.00 |
| ATOM | 3050 | N    | GLY | 197 | 51.032 | 37.411 | 43.429 | 0.00 | 0.00 |
| ATOM | 3051 | H    | GLY | 197 | 50.406 | 36.928 | 44.058 | 0.00 | 0.00 |
| ATOM | 3052 | CA   | GLY | 197 | 50.417 | 37.998 | 42.232 | 0.00 | 0.00 |
| ATOM | 3053 | HA2  | GLY | 197 | 49.339 | 37.841 | 42.288 | 0.00 | 0.00 |
| ATOM | 3054 | HA3  | GLY | 197 | 50.410 | 39.086 | 42.311 | 0.00 | 0.00 |
| ATOM | 3055 | C    | GLY | 197 | 50.967 | 37.481 | 40.854 | 0.00 | 0.00 |
| ATOM | 3056 | O    | GLY | 197 | 50.624 | 38.043 | 39.776 | 0.00 | 0.00 |
| ATOM | 3057 | N    | GLU | 198 | 51.635 | 36.342 | 40.886 | 0.00 | 0.00 |
| ATOM | 3058 | H    | GLU | 198 | 51.869 | 35.947 | 41.785 | 0.00 | 0.00 |
| ATOM | 3059 | CA   | GLU | 198 | 52.317 | 35.879 | 39.717 | 0.00 | 0.00 |
| ATOM | 3060 | HA   | GLU | 198 | 52.934 | 36.668 | 39.286 | 0.00 | 0.00 |
| ATOM | 3061 | CB   | GLU | 198 | 53.255 | 34.719 | 40.255 | 0.00 | 0.00 |
| ATOM | 3062 | HB2  | GLU | 198 | 53.471 | 34.866 | 41.313 | 0.00 | 0.00 |
| ATOM | 3063 | HB3  | GLU | 198 | 52.578 | 33.871 | 40.354 | 0.00 | 0.00 |
| ATOM | 3064 | CG   | GLU | 198 | 54.412 | 34.379 | 39.337 | 0.00 | 0.00 |
| ATOM | 3065 | HG2  | GLU | 198 | 54.133 | 33.761 | 38.483 | 0.00 | 0.00 |
| ATOM | 3066 | HG3  | GLU | 198 | 54.960 | 35.247 | 38.971 | 0.00 | 0.00 |
| ATOM | 3067 | CD   | GLU | 198 | 55.328 | 33.490 | 40.071 | 0.00 | 0.00 |

|      |      |      |     |     |        |        |        |      |      |
|------|------|------|-----|-----|--------|--------|--------|------|------|
| ATOM | 3068 | OE1  | GLU | 198 | 54.869 | 32.348 | 40.394 | 0.00 | 0.00 |
| ATOM | 3069 | OE2  | GLU | 198 | 56.414 | 33.888 | 40.578 | 0.00 | 0.00 |
| ATOM | 3070 | C    | GLU | 198 | 51.308 | 35.332 | 38.742 | 0.00 | 0.00 |
| ATOM | 3071 | O    | GLU | 198 | 51.528 | 35.374 | 37.523 | 0.00 | 0.00 |
| ATOM | 3072 | N    | VAL | 199 | 50.141 | 34.826 | 39.187 | 0.00 | 0.00 |
| ATOM | 3073 | H    | VAL | 199 | 50.060 | 34.863 | 40.193 | 0.00 | 0.00 |
| ATOM | 3074 | CA   | VAL | 199 | 48.895 | 34.578 | 38.479 | 0.00 | 0.00 |
| ATOM | 3075 | HA   | VAL | 199 | 48.891 | 35.177 | 37.569 | 0.00 | 0.00 |
| ATOM | 3076 | CB   | VAL | 199 | 48.753 | 33.046 | 38.098 | 0.00 | 0.00 |
| ATOM | 3077 | HB   | VAL | 199 | 47.702 | 32.968 | 37.817 | 0.00 | 0.00 |
| ATOM | 3078 | CG1  | VAL | 199 | 49.599 | 32.708 | 36.850 | 0.00 | 0.00 |
| ATOM | 3079 | 1HG1 | VAL | 199 | 50.622 | 32.569 | 37.198 | 0.00 | 0.00 |
| ATOM | 3080 | 2HG1 | VAL | 199 | 49.204 | 31.823 | 36.349 | 0.00 | 0.00 |
| ATOM | 3081 | 3HG1 | VAL | 199 | 49.543 | 33.448 | 36.052 | 0.00 | 0.00 |
| ATOM | 3082 | CG2  | VAL | 199 | 49.104 | 32.122 | 39.271 | 0.00 | 0.00 |
| ATOM | 3083 | 1HG2 | VAL | 199 | 48.423 | 32.319 | 40.099 | 0.00 | 0.00 |
| ATOM | 3084 | 2HG2 | VAL | 199 | 48.988 | 31.119 | 38.862 | 0.00 | 0.00 |
| ATOM | 3085 | 3HG2 | VAL | 199 | 50.160 | 32.170 | 39.535 | 0.00 | 0.00 |
| ATOM | 3086 | C    | VAL | 199 | 47.687 | 35.193 | 39.197 | 0.00 | 0.00 |
| ATOM | 3087 | O    | VAL | 199 | 47.649 | 35.234 | 40.469 | 0.00 | 0.00 |
| ATOM | 3088 | N    | MET | 200 | 46.699 | 35.590 | 38.399 | 0.00 | 0.00 |
| ATOM | 3089 | H    | MET | 200 | 46.848 | 35.589 | 37.400 | 0.00 | 0.00 |
| ATOM | 3090 | CA   | MET | 200 | 45.396 | 36.028 | 39.011 | 0.00 | 0.00 |
| ATOM | 3091 | HA   | MET | 200 | 45.389 | 35.538 | 39.985 | 0.00 | 0.00 |
| ATOM | 3092 | CB   | MET | 200 | 45.383 | 37.579 | 39.202 | 0.00 | 0.00 |
| ATOM | 3093 | HB2  | MET | 200 | 45.352 | 38.091 | 38.240 | 0.00 | 0.00 |

|      |      |     |     |     |        |        |        |      |      |
|------|------|-----|-----|-----|--------|--------|--------|------|------|
| ATOM | 3094 | HB3 | MET | 200 | 44.432 | 37.872 | 39.646 | 0.00 | 0.00 |
| ATOM | 3095 | CG  | MET | 200 | 46.455 | 38.111 | 40.173 | 0.00 | 0.00 |
| ATOM | 3096 | HG2 | MET | 200 | 46.512 | 37.649 | 41.159 | 0.00 | 0.00 |
| ATOM | 3097 | HG3 | MET | 200 | 47.432 | 38.070 | 39.691 | 0.00 | 0.00 |
| ATOM | 3098 | SD  | MET | 200 | 46.204 | 39.833 | 40.603 | 0.00 | 0.00 |
| ATOM | 3099 | CE  | MET | 200 | 47.693 | 40.366 | 41.451 | 0.00 | 0.00 |
| ATOM | 3100 | HE1 | MET | 200 | 47.636 | 41.419 | 41.723 | 0.00 | 0.00 |
| ATOM | 3101 | HE2 | MET | 200 | 47.819 | 39.767 | 42.353 | 0.00 | 0.00 |
| ATOM | 3102 | HE3 | MET | 200 | 48.468 | 40.288 | 40.689 | 0.00 | 0.00 |
| ATOM | 3103 | C   | MET | 200 | 44.147 | 35.664 | 38.185 | 0.00 | 0.00 |
| ATOM | 3104 | O   | MET | 200 | 44.202 | 35.770 | 36.974 | 0.00 | 0.00 |
| ATOM | 3105 | N   | GLY | 201 | 43.110 | 35.302 | 38.874 | 0.00 | 0.00 |
| ATOM | 3106 | H   | GLY | 201 | 43.138 | 35.271 | 39.883 | 0.00 | 0.00 |
| ATOM | 3107 | CA  | GLY | 201 | 41.940 | 34.661 | 38.320 | 0.00 | 0.00 |
| ATOM | 3108 | HA2 | GLY | 201 | 41.841 | 34.920 | 37.266 | 0.00 | 0.00 |
| ATOM | 3109 | HA3 | GLY | 201 | 41.987 | 33.576 | 38.416 | 0.00 | 0.00 |
| ATOM | 3110 | C   | GLY | 201 | 40.719 | 35.000 | 39.104 | 0.00 | 0.00 |
| ATOM | 3111 | O   | GLY | 201 | 40.313 | 34.266 | 39.993 | 0.00 | 0.00 |
| ATOM | 3112 | N   | PRO | 202 | 39.985 | 36.063 | 38.704 | 0.00 | 0.00 |
| ATOM | 3113 | CD  | PRO | 202 | 40.318 | 37.296 | 37.962 | 0.00 | 0.00 |
| ATOM | 3114 | HD2 | PRO | 202 | 41.236 | 37.751 | 38.333 | 0.00 | 0.00 |
| ATOM | 3115 | HD3 | PRO | 202 | 40.377 | 37.049 | 36.902 | 0.00 | 0.00 |
| ATOM | 3116 | CG  | PRO | 202 | 39.343 | 38.365 | 38.275 | 0.00 | 0.00 |
| ATOM | 3117 | HG2 | PRO | 202 | 39.783 | 39.351 | 38.423 | 0.00 | 0.00 |
| ATOM | 3118 | HG3 | PRO | 202 | 38.581 | 38.436 | 37.499 | 0.00 | 0.00 |
| ATOM | 3119 | CB  | PRO | 202 | 38.647 | 37.860 | 39.503 | 0.00 | 0.00 |

|      |      |          |     |        |        |        |      |      |
|------|------|----------|-----|--------|--------|--------|------|------|
| ATOM | 3120 | HB2 PRO  | 202 | 39.133 | 38.292 | 40.378 | 0.00 | 0.00 |
| ATOM | 3121 | HB3 PRO  | 202 | 37.626 | 38.240 | 39.471 | 0.00 | 0.00 |
| ATOM | 3122 | CA PRO   | 202 | 38.739 | 36.346 | 39.459 | 0.00 | 0.00 |
| ATOM | 3123 | HA PRO   | 202 | 38.816 | 36.094 | 40.517 | 0.00 | 0.00 |
| ATOM | 3124 | C PRO    | 202 | 37.487 | 35.616 | 38.888 | 0.00 | 0.00 |
| ATOM | 3125 | O PRO    | 202 | 37.466 | 35.271 | 37.701 | 0.00 | 0.00 |
| ATOM | 3126 | N LEC    | 203 | 36.356 | 35.442 | 39.702 | 0.00 | 0.00 |
| ATOM | 3127 | H LEC    | 203 | 36.368 | 35.958 | 40.571 | 0.00 | 0.00 |
| ATOM | 3128 | CA LEC   | 203 | 35.094 | 34.658 | 39.436 | 0.00 | 0.00 |
| ATOM | 3129 | HA LEC   | 203 | 35.323 | 33.741 | 38.893 | 0.00 | 0.00 |
| ATOM | 3130 | CB LEC   | 203 | 34.559 | 34.339 | 40.849 | 0.00 | 0.00 |
| ATOM | 3131 | HB2 LEC  | 203 | 34.190 | 35.235 | 41.348 | 0.00 | 0.00 |
| ATOM | 3132 | HB3 LEC  | 203 | 33.710 | 33.681 | 40.661 | 0.00 | 0.00 |
| ATOM | 3133 | CG LEC   | 203 | 35.493 | 33.592 | 41.888 | 0.00 | 0.00 |
| ATOM | 3134 | HG LEC   | 203 | 36.309 | 34.221 | 42.243 | 0.00 | 0.00 |
| ATOM | 3135 | CD1 LEC  | 203 | 34.752 | 33.086 | 43.137 | 0.00 | 0.00 |
| ATOM | 3136 | 1HD1 LEC | 203 | 35.418 | 32.777 | 43.942 | 0.00 | 0.00 |
| ATOM | 3137 | 2HD1 LEC | 203 | 34.239 | 33.958 | 43.542 | 0.00 | 0.00 |
| ATOM | 3138 | 3HD1 LEC | 203 | 34.062 | 32.262 | 42.957 | 0.00 | 0.00 |
| ATOM | 3139 | CD2 LEC  | 203 | 36.210 | 32.300 | 41.414 | 0.00 | 0.00 |
| ATOM | 3140 | 1HD2 LEC | 203 | 36.771 | 31.707 | 42.136 | 0.00 | 0.00 |
| ATOM | 3141 | 2HD2 LEC | 203 | 35.466 | 31.634 | 40.978 | 0.00 | 0.00 |
| ATOM | 3142 | 3HD2 LEC | 203 | 36.804 | 32.484 | 40.519 | 0.00 | 0.00 |
| ATOM | 3143 | C LEC    | 203 | 34.105 | 35.544 | 38.549 | 0.00 | 0.00 |
| ATOM | 3144 | O LEC    | 203 | 33.303 | 35.072 | 37.725 | 0.00 | 0.00 |
| ATOM | 3145 | OXT LEC  | 203 | 34.107 | 36.824 | 38.741 | 0.00 | 0.00 |

|      |      |      |     |     |        |        |        |      |      |
|------|------|------|-----|-----|--------|--------|--------|------|------|
| ATOM | 3146 | N    | SEN | 204 | 45.110 | 27.730 | 67.293 | 0.00 | 0.00 |
| ATOM | 3147 | H1   | SEN | 204 | 45.365 | 28.700 | 67.412 | 0.00 | 0.00 |
| ATOM | 3148 | H2   | SEN | 204 | 44.109 | 27.676 | 67.421 | 0.00 | 0.00 |
| ATOM | 3149 | H3   | SEN | 204 | 45.320 | 27.456 | 66.344 | 0.00 | 0.00 |
| ATOM | 3150 | CA   | SEN | 204 | 45.753 | 26.952 | 68.402 | 0.00 | 0.00 |
| ATOM | 3151 | HA   | SEN | 204 | 45.574 | 25.879 | 68.325 | 0.00 | 0.00 |
| ATOM | 3152 | CB   | SEN | 204 | 47.264 | 27.152 | 68.341 | 0.00 | 0.00 |
| ATOM | 3153 | HB2  | SEN | 204 | 47.682 | 26.644 | 69.211 | 0.00 | 0.00 |
| ATOM | 3154 | HB3  | SEN | 204 | 47.663 | 26.600 | 67.490 | 0.00 | 0.00 |
| ATOM | 3155 | OG   | SEN | 204 | 47.651 | 28.527 | 68.400 | 0.00 | 0.00 |
| ATOM | 3156 | HG   | SEN | 204 | 48.334 | 28.597 | 69.072 | 0.00 | 0.00 |
| ATOM | 3157 | C    | SEN | 204 | 45.319 | 27.536 | 69.706 | 0.00 | 0.00 |
| ATOM | 3158 | O    | SEN | 204 | 44.630 | 28.501 | 69.641 | 0.00 | 0.00 |
| ATOM | 3159 | N    | ASN | 205 | 45.629 | 26.965 | 70.884 | 0.00 | 0.00 |
| ATOM | 3160 | H    | ASN | 205 | 46.165 | 26.109 | 70.899 | 0.00 | 0.00 |
| ATOM | 3161 | CA   | ASN | 205 | 45.488 | 27.623 | 72.201 | 0.00 | 0.00 |
| ATOM | 3162 | HA   | ASN | 205 | 45.038 | 28.594 | 71.994 | 0.00 | 0.00 |
| ATOM | 3163 | CB   | ASN | 205 | 44.444 | 26.873 | 73.127 | 0.00 | 0.00 |
| ATOM | 3164 | HB2  | ASN | 205 | 44.152 | 27.665 | 73.816 | 0.00 | 0.00 |
| ATOM | 3165 | HB3  | ASN | 205 | 43.637 | 26.498 | 72.498 | 0.00 | 0.00 |
| ATOM | 3166 | CG   | ASN | 205 | 44.947 | 25.740 | 73.979 | 0.00 | 0.00 |
| ATOM | 3167 | OD1  | ASN | 205 | 45.172 | 25.880 | 75.169 | 0.00 | 0.00 |
| ATOM | 3168 | ND2  | ASN | 205 | 45.209 | 24.575 | 73.491 | 0.00 | 0.00 |
| ATOM | 3169 | 1HD2 | ASN | 205 | 45.551 | 23.808 | 74.052 | 0.00 | 0.00 |
| ATOM | 3170 | 2HD2 | ASN | 205 | 45.229 | 24.451 | 72.489 | 0.00 | 0.00 |
| ATOM | 3171 | C    | ASN | 205 | 46.849 | 27.851 | 72.864 | 0.00 | 0.00 |

|      |      |      |     |     |        |        |        |      |      |
|------|------|------|-----|-----|--------|--------|--------|------|------|
| ATOM | 3172 | O    | ASN | 205 | 47.813 | 27.072 | 72.584 | 0.00 | 0.00 |
| ATOM | 3173 | N    | ILE | 206 | 46.880 | 28.913 | 73.648 | 0.00 | 0.00 |
| ATOM | 3174 | H    | ILE | 206 | 46.044 | 29.469 | 73.532 | 0.00 | 0.00 |
| ATOM | 3175 | CA   | ILE | 206 | 47.988 | 29.345 | 74.533 | 0.00 | 0.00 |
| ATOM | 3176 | HA   | ILE | 206 | 48.671 | 28.497 | 74.492 | 0.00 | 0.00 |
| ATOM | 3177 | CB   | ILE | 206 | 48.657 | 30.588 | 73.902 | 0.00 | 0.00 |
| ATOM | 3178 | HB   | ILE | 206 | 48.628 | 30.349 | 72.839 | 0.00 | 0.00 |
| ATOM | 3179 | CG2  | ILE | 206 | 47.985 | 31.973 | 74.137 | 0.00 | 0.00 |
| ATOM | 3180 | 1HG2 | ILE | 206 | 46.996 | 31.829 | 73.702 | 0.00 | 0.00 |
| ATOM | 3181 | 2HG2 | ILE | 206 | 47.921 | 32.038 | 75.223 | 0.00 | 0.00 |
| ATOM | 3182 | 3HG2 | ILE | 206 | 48.517 | 32.771 | 73.620 | 0.00 | 0.00 |
| ATOM | 3183 | CG1  | ILE | 206 | 50.119 | 30.711 | 74.387 | 0.00 | 0.00 |
| ATOM | 3184 | 2HG1 | ILE | 206 | 50.103 | 31.102 | 75.405 | 0.00 | 0.00 |
| ATOM | 3185 | 3HG1 | ILE | 206 | 50.570 | 29.720 | 74.445 | 0.00 | 0.00 |
| ATOM | 3186 | CD1  | ILE | 206 | 51.237 | 31.524 | 73.532 | 0.00 | 0.00 |
| ATOM | 3187 | 1HD1 | ILE | 206 | 51.267 | 31.083 | 72.536 | 0.00 | 0.00 |
| ATOM | 3188 | 2HD1 | ILE | 206 | 50.913 | 32.564 | 73.487 | 0.00 | 0.00 |
| ATOM | 3189 | 3HD1 | ILE | 206 | 52.206 | 31.488 | 74.029 | 0.00 | 0.00 |
| ATOM | 3190 | C    | ILE | 206 | 47.624 | 29.601 | 76.066 | 0.00 | 0.00 |
| ATOM | 3191 | O    | ILE | 206 | 46.458 | 29.808 | 76.321 | 0.00 | 0.00 |
| ATOM | 3192 | N    | SER | 207 | 48.624 | 29.623 | 76.979 | 0.00 | 0.00 |
| ATOM | 3193 | H    | SER | 207 | 49.522 | 29.356 | 76.601 | 0.00 | 0.00 |
| ATOM | 3194 | CA   | SER | 207 | 48.354 | 30.027 | 78.328 | 0.00 | 0.00 |
| ATOM | 3195 | HA   | SER | 207 | 47.378 | 29.581 | 78.519 | 0.00 | 0.00 |
| ATOM | 3196 | CB   | SER | 207 | 49.350 | 29.365 | 79.256 | 0.00 | 0.00 |
| ATOM | 3197 | HB2  | SER | 207 | 49.125 | 29.457 | 80.319 | 0.00 | 0.00 |

|      |      |      |     |     |        |        |        |      |      |
|------|------|------|-----|-----|--------|--------|--------|------|------|
| ATOM | 3198 | HB3  | SER | 207 | 49.382 | 28.309 | 78.986 | 0.00 | 0.00 |
| ATOM | 3199 | OG   | SER | 207 | 50.614 | 29.966 | 79.027 | 0.00 | 0.00 |
| ATOM | 3200 | HG   | SER | 207 | 50.975 | 29.388 | 78.351 | 0.00 | 0.00 |
| ATOM | 3201 | C    | SER | 207 | 48.306 | 31.502 | 78.568 | 0.00 | 0.00 |
| ATOM | 3202 | O    | SER | 207 | 48.953 | 32.267 | 77.809 | 0.00 | 0.00 |
| ATOM | 3203 | N    | ARG | 208 | 47.604 | 31.896 | 79.671 | 0.00 | 0.00 |
| ATOM | 3204 | H    | ARG | 208 | 47.316 | 31.163 | 80.303 | 0.00 | 0.00 |
| ATOM | 3205 | CA   | ARG | 208 | 47.436 | 33.262 | 80.016 | 0.00 | 0.00 |
| ATOM | 3206 | HA   | ARG | 208 | 47.126 | 33.779 | 79.108 | 0.00 | 0.00 |
| ATOM | 3207 | CB   | ARG | 208 | 46.438 | 33.448 | 81.219 | 0.00 | 0.00 |
| ATOM | 3208 | HB2  | ARG | 208 | 46.126 | 32.484 | 81.619 | 0.00 | 0.00 |
| ATOM | 3209 | HB3  | ARG | 208 | 47.013 | 33.969 | 81.984 | 0.00 | 0.00 |
| ATOM | 3210 | CG   | ARG | 208 | 45.173 | 34.099 | 80.752 | 0.00 | 0.00 |
| ATOM | 3211 | HG2  | ARG | 208 | 44.654 | 33.412 | 80.084 | 0.00 | 0.00 |
| ATOM | 3212 | HG3  | ARG | 208 | 45.366 | 35.012 | 80.188 | 0.00 | 0.00 |
| ATOM | 3213 | CD   | ARG | 208 | 44.255 | 34.475 | 81.980 | 0.00 | 0.00 |
| ATOM | 3214 | HD2  | ARG | 208 | 44.153 | 33.524 | 82.502 | 0.00 | 0.00 |
| ATOM | 3215 | HD3  | ARG | 208 | 44.698 | 35.215 | 82.647 | 0.00 | 0.00 |
| ATOM | 3216 | NE   | ARG | 208 | 42.943 | 34.959 | 81.465 | 0.00 | 0.00 |
| ATOM | 3217 | HE   | ARG | 208 | 42.270 | 34.273 | 81.155 | 0.00 | 0.00 |
| ATOM | 3218 | CZ   | ARG | 208 | 42.458 | 36.198 | 81.455 | 0.00 | 0.00 |
| ATOM | 3219 | NH1  | ARG | 208 | 43.082 | 37.190 | 82.101 | 0.00 | 0.00 |
| ATOM | 3220 | 1HH1 | ARG | 208 | 42.704 | 38.114 | 82.250 | 0.00 | 0.00 |
| ATOM | 3221 | 2HH1 | ARG | 208 | 44.074 | 37.070 | 82.248 | 0.00 | 0.00 |
| ATOM | 3222 | NH2  | ARG | 208 | 41.395 | 36.556 | 80.845 | 0.00 | 0.00 |
| ATOM | 3223 | 1HH2 | ARG | 208 | 41.133 | 37.531 | 80.879 | 0.00 | 0.00 |

|      |      |      |     |     |        |        |        |      |      |
|------|------|------|-----|-----|--------|--------|--------|------|------|
| ATOM | 3224 | 2HH2 | ARG | 208 | 40.708 | 36.037 | 80.317 | 0.00 | 0.00 |
| ATOM | 3225 | C    | ARG | 208 | 48.799 | 33.955 | 80.340 | 0.00 | 0.00 |
| ATOM | 3226 | O    | ARG | 208 | 48.925 | 35.145 | 80.108 | 0.00 | 0.00 |
| ATOM | 3227 | N    | GLN | 209 | 49.859 | 33.171 | 80.704 | 0.00 | 0.00 |
| ATOM | 3228 | H    | GLN | 209 | 49.621 | 32.209 | 80.898 | 0.00 | 0.00 |
| ATOM | 3229 | CA   | GLN | 209 | 51.192 | 33.664 | 81.119 | 0.00 | 0.00 |
| ATOM | 3230 | HA   | GLN | 209 | 51.060 | 34.636 | 81.596 | 0.00 | 0.00 |
| ATOM | 3231 | CB   | GLN | 209 | 51.909 | 32.732 | 82.177 | 0.00 | 0.00 |
| ATOM | 3232 | HB2  | GLN | 209 | 51.870 | 31.663 | 81.971 | 0.00 | 0.00 |
| ATOM | 3233 | HB3  | GLN | 209 | 52.966 | 32.988 | 82.247 | 0.00 | 0.00 |
| ATOM | 3234 | CG   | GLN | 209 | 51.347 | 33.020 | 83.562 | 0.00 | 0.00 |
| ATOM | 3235 | HG2  | GLN | 209 | 51.321 | 34.106 | 83.643 | 0.00 | 0.00 |
| ATOM | 3236 | HG3  | GLN | 209 | 50.301 | 32.713 | 83.556 | 0.00 | 0.00 |
| ATOM | 3237 | CD   | GLN | 209 | 52.062 | 32.416 | 84.714 | 0.00 | 0.00 |
| ATOM | 3238 | OE1  | GLN | 209 | 53.114 | 31.848 | 84.666 | 0.00 | 0.00 |
| ATOM | 3239 | NE2  | GLN | 209 | 51.522 | 32.722 | 85.882 | 0.00 | 0.00 |
| ATOM | 3240 | 1HE2 | GLN | 209 | 51.982 | 32.506 | 86.755 | 0.00 | 0.00 |
| ATOM | 3241 | 2HE2 | GLN | 209 | 50.787 | 33.414 | 85.846 | 0.00 | 0.00 |
| ATOM | 3242 | C    | GLN | 209 | 52.141 | 33.878 | 79.938 | 0.00 | 0.00 |
| ATOM | 3243 | O    | GLN | 209 | 52.867 | 34.886 | 79.702 | 0.00 | 0.00 |
| ATOM | 3244 | N    | ALA | 210 | 52.007 | 32.952 | 79.008 | 0.00 | 0.00 |
| ATOM | 3245 | H    | ALA | 210 | 51.451 | 32.127 | 79.186 | 0.00 | 0.00 |
| ATOM | 3246 | CA   | ALA | 210 | 52.643 | 33.063 | 77.695 | 0.00 | 0.00 |
| ATOM | 3247 | HA   | ALA | 210 | 53.602 | 33.525 | 77.931 | 0.00 | 0.00 |
| ATOM | 3248 | CB   | ALA | 210 | 52.796 | 31.737 | 76.977 | 0.00 | 0.00 |
| ATOM | 3249 | HB1  | ALA | 210 | 53.257 | 31.841 | 75.994 | 0.00 | 0.00 |



|      |      |     |     |     |        |        |        |      |      |
|------|------|-----|-----|-----|--------|--------|--------|------|------|
| ATOM | 3250 | HB2 | ALA | 210 | 53.325 | 30.974 | 77.547 | 0.00 | 0.00 |
| ATOM | 3251 | HB3 | ALA | 210 | 51.849 | 31.220 | 76.823 | 0.00 | 0.00 |
| ATOM | 3252 | C   | ALA | 210 | 51.995 | 34.089 | 76.813 | 0.00 | 0.00 |
| ATOM | 3253 | O   | ALA | 210 | 52.802 | 34.814 | 76.160 | 0.00 | 0.00 |
| ATOM | 3254 | N   | TYR | 211 | 50.665 | 34.328 | 76.879 | 0.00 | 0.00 |
| ATOM | 3255 | H   | TYR | 211 | 50.088 | 33.666 | 77.378 | 0.00 | 0.00 |
| ATOM | 3256 | CA  | TYR | 211 | 50.055 | 35.481 | 76.245 | 0.00 | 0.00 |
| ATOM | 3257 | HA  | TYR | 211 | 50.234 | 35.413 | 75.172 | 0.00 | 0.00 |
| ATOM | 3258 | CB  | TYR | 211 | 48.531 | 35.382 | 76.475 | 0.00 | 0.00 |
| ATOM | 3259 | HB2 | TYR | 211 | 48.125 | 34.391 | 76.270 | 0.00 | 0.00 |
| ATOM | 3260 | HB3 | TYR | 211 | 48.310 | 35.711 | 77.490 | 0.00 | 0.00 |
| ATOM | 3261 | CG  | TYR | 211 | 47.707 | 36.223 | 75.513 | 0.00 | 0.00 |
| ATOM | 3262 | CD1 | TYR | 211 | 47.308 | 35.798 | 74.310 | 0.00 | 0.00 |
| ATOM | 3263 | HD1 | TYR | 211 | 47.222 | 34.752 | 74.054 | 0.00 | 0.00 |
| ATOM | 3264 | CE1 | TYR | 211 | 46.667 | 36.703 | 73.383 | 0.00 | 0.00 |
| ATOM | 3265 | HE1 | TYR | 211 | 46.222 | 36.332 | 72.472 | 0.00 | 0.00 |
| ATOM | 3266 | CZ  | TYR | 211 | 46.563 | 38.053 | 73.735 | 0.00 | 0.00 |
| ATOM | 3267 | OH  | TYR | 211 | 45.948 | 38.932 | 72.951 | 0.00 | 0.00 |
| ATOM | 3268 | HH  | TYR | 211 | 45.837 | 38.577 | 72.066 | 0.00 | 0.00 |
| ATOM | 3269 | CE2 | TYR | 211 | 47.076 | 38.520 | 74.961 | 0.00 | 0.00 |
| ATOM | 3270 | HE2 | TYR | 211 | 47.024 | 39.574 | 75.192 | 0.00 | 0.00 |
| ATOM | 3271 | CD2 | TYR | 211 | 47.699 | 37.616 | 75.817 | 0.00 | 0.00 |
| ATOM | 3272 | HD2 | TYR | 211 | 47.980 | 37.915 | 76.816 | 0.00 | 0.00 |
| ATOM | 3273 | C   | TYR | 211 | 50.744 | 36.743 | 76.785 | 0.00 | 0.00 |
| ATOM | 3274 | O   | TYR | 211 | 51.024 | 37.621 | 75.982 | 0.00 | 0.00 |
| ATOM | 3275 | N   | ALA | 212 | 51.026 | 36.866 | 78.077 | 0.00 | 0.00 |

|      |      |     |     |     |        |        |        |      |      |
|------|------|-----|-----|-----|--------|--------|--------|------|------|
| ATOM | 3276 | H   | ALA | 212 | 50.848 | 36.094 | 78.704 | 0.00 | 0.00 |
| ATOM | 3277 | CA  | ALA | 212 | 51.363 | 38.204 | 78.643 | 0.00 | 0.00 |
| ATOM | 3278 | HA  | ALA | 212 | 50.607 | 38.904 | 78.288 | 0.00 | 0.00 |
| ATOM | 3279 | CB  | ALA | 212 | 51.232 | 38.183 | 80.166 | 0.00 | 0.00 |
| ATOM | 3280 | HB1 | ALA | 212 | 52.046 | 37.530 | 80.478 | 0.00 | 0.00 |
| ATOM | 3281 | HB2 | ALA | 212 | 51.392 | 39.181 | 80.574 | 0.00 | 0.00 |
| ATOM | 3282 | HB3 | ALA | 212 | 50.245 | 37.860 | 80.499 | 0.00 | 0.00 |
| ATOM | 3283 | C   | ALA | 212 | 52.767 | 38.687 | 78.139 | 0.00 | 0.00 |
| ATOM | 3284 | O   | ALA | 212 | 52.882 | 39.845 | 77.818 | 0.00 | 0.00 |
| ATOM | 3285 | N   | ASP | 213 | 53.727 | 37.757 | 77.861 | 0.00 | 0.00 |
| ATOM | 3286 | H   | ASP | 213 | 53.586 | 36.787 | 78.106 | 0.00 | 0.00 |
| ATOM | 3287 | CA  | ASP | 213 | 55.093 | 38.092 | 77.311 | 0.00 | 0.00 |
| ATOM | 3288 | HA  | ASP | 213 | 55.541 | 38.958 | 77.799 | 0.00 | 0.00 |
| ATOM | 3289 | CB  | ASP | 213 | 56.052 | 36.840 | 77.659 | 0.00 | 0.00 |
| ATOM | 3290 | HB2 | ASP | 213 | 55.895 | 36.557 | 78.700 | 0.00 | 0.00 |
| ATOM | 3291 | HB3 | ASP | 213 | 55.691 | 36.034 | 77.020 | 0.00 | 0.00 |
| ATOM | 3292 | CG  | ASP | 213 | 57.490 | 37.087 | 77.265 | 0.00 | 0.00 |
| ATOM | 3293 | OD1 | ASP | 213 | 58.175 | 36.178 | 76.726 | 0.00 | 0.00 |
| ATOM | 3294 | OD2 | ASP | 213 | 58.070 | 38.021 | 77.818 | 0.00 | 0.00 |
| ATOM | 3295 | C   | ASP | 213 | 55.091 | 38.192 | 75.687 | 0.00 | 0.00 |
| ATOM | 3296 | O   | ASP | 213 | 56.098 | 38.628 | 75.123 | 0.00 | 0.00 |
| ATOM | 3297 | N   | MET | 214 | 54.008 | 37.782 | 75.065 | 0.00 | 0.00 |
| ATOM | 3298 | H   | MET | 214 | 53.177 | 37.640 | 75.622 | 0.00 | 0.00 |
| ATOM | 3299 | CA  | MET | 214 | 53.758 | 37.976 | 73.710 | 0.00 | 0.00 |
| ATOM | 3300 | HA  | MET | 214 | 54.735 | 38.180 | 73.274 | 0.00 | 0.00 |
| ATOM | 3301 | CB  | MET | 214 | 53.283 | 36.672 | 73.034 | 0.00 | 0.00 |

|      |      |     |     |     |        |        |        |      |      |
|------|------|-----|-----|-----|--------|--------|--------|------|------|
| ATOM | 3302 | HB2 | MET | 214 | 52.200 | 36.548 | 73.031 | 0.00 | 0.00 |
| ATOM | 3303 | HB3 | MET | 214 | 53.554 | 35.808 | 73.640 | 0.00 | 0.00 |
| ATOM | 3304 | CG  | MET | 214 | 53.730 | 36.528 | 71.588 | 0.00 | 0.00 |
| ATOM | 3305 | HG2 | MET | 214 | 53.169 | 37.301 | 71.064 | 0.00 | 0.00 |
| ATOM | 3306 | HG3 | MET | 214 | 54.812 | 36.648 | 71.549 | 0.00 | 0.00 |
| ATOM | 3307 | SD  | MET | 214 | 53.295 | 34.938 | 70.887 | 0.00 | 0.00 |
| ATOM | 3308 | CE  | MET | 214 | 53.816 | 33.705 | 72.112 | 0.00 | 0.00 |
| ATOM | 3309 | HE1 | MET | 214 | 53.115 | 33.539 | 72.930 | 0.00 | 0.00 |
| ATOM | 3310 | HE2 | MET | 214 | 54.000 | 32.761 | 71.599 | 0.00 | 0.00 |
| ATOM | 3311 | HE3 | MET | 214 | 54.744 | 34.078 | 72.545 | 0.00 | 0.00 |
| ATOM | 3312 | C   | MET | 214 | 52.999 | 39.261 | 73.233 | 0.00 | 0.00 |
| ATOM | 3313 | O   | MET | 214 | 53.389 | 39.839 | 72.225 | 0.00 | 0.00 |
| ATOM | 3314 | N   | PHE | 215 | 51.922 | 39.572 | 73.933 | 0.00 | 0.00 |
| ATOM | 3315 | H   | PHE | 215 | 51.848 | 39.053 | 74.796 | 0.00 | 0.00 |
| ATOM | 3316 | CA  | PHE | 215 | 50.883 | 40.621 | 73.587 | 0.00 | 0.00 |
| ATOM | 3317 | HA  | PHE | 215 | 51.257 | 41.211 | 72.750 | 0.00 | 0.00 |
| ATOM | 3318 | CB  | PHE | 215 | 49.612 | 39.871 | 73.056 | 0.00 | 0.00 |
| ATOM | 3319 | HB2 | PHE | 215 | 49.196 | 39.265 | 73.860 | 0.00 | 0.00 |
| ATOM | 3320 | HB3 | PHE | 215 | 48.861 | 40.557 | 72.664 | 0.00 | 0.00 |
| ATOM | 3321 | CG  | PHE | 215 | 49.926 | 38.883 | 71.893 | 0.00 | 0.00 |
| ATOM | 3322 | CD1 | PHE | 215 | 49.722 | 37.510 | 72.046 | 0.00 | 0.00 |
| ATOM | 3323 | HD1 | PHE | 215 | 49.256 | 37.193 | 72.967 | 0.00 | 0.00 |
| ATOM | 3324 | CE1 | PHE | 215 | 50.109 | 36.551 | 71.051 | 0.00 | 0.00 |
| ATOM | 3325 | HE1 | PHE | 215 | 49.924 | 35.516 | 71.300 | 0.00 | 0.00 |
| ATOM | 3326 | CZ  | PHE | 215 | 50.641 | 37.013 | 69.831 | 0.00 | 0.00 |
| ATOM | 3327 | HZ  | PHE | 215 | 50.945 | 36.298 | 69.081 | 0.00 | 0.00 |

|      |      |     |     |     |        |        |        |      |      |
|------|------|-----|-----|-----|--------|--------|--------|------|------|
| ATOM | 3328 | CE2 | PHE | 215 | 50.820 | 38.412 | 69.657 | 0.00 | 0.00 |
| ATOM | 3329 | HE2 | PHE | 215 | 51.090 | 38.972 | 68.774 | 0.00 | 0.00 |
| ATOM | 3330 | CD2 | PHE | 215 | 50.439 | 39.335 | 70.641 | 0.00 | 0.00 |
| ATOM | 3331 | HD2 | PHE | 215 | 50.420 | 40.392 | 70.418 | 0.00 | 0.00 |
| ATOM | 3332 | C   | PHE | 215 | 50.560 | 41.585 | 74.731 | 0.00 | 0.00 |
| ATOM | 3333 | O   | PHE | 215 | 49.554 | 42.324 | 74.657 | 0.00 | 0.00 |
| ATOM | 3334 | N   | GLY | 216 | 51.265 | 41.548 | 75.883 | 0.00 | 0.00 |
| ATOM | 3335 | H   | GLY | 216 | 52.171 | 41.106 | 75.951 | 0.00 | 0.00 |
| ATOM | 3336 | CA  | GLY | 216 | 50.932 | 42.118 | 77.190 | 0.00 | 0.00 |
| ATOM | 3337 | HA2 | GLY | 216 | 51.802 | 42.159 | 77.845 | 0.00 | 0.00 |
| ATOM | 3338 | HA3 | GLY | 216 | 50.656 | 43.143 | 76.941 | 0.00 | 0.00 |
| ATOM | 3339 | C   | GLY | 216 | 49.657 | 41.464 | 77.757 | 0.00 | 0.00 |
| ATOM | 3340 | O   | GLY | 216 | 48.938 | 40.839 | 77.057 | 0.00 | 0.00 |
| ATOM | 3341 | N   | PRO | 217 | 49.408 | 41.570 | 79.077 | 0.00 | 0.00 |
| ATOM | 3342 | CD  | PRO | 217 | 50.228 | 42.167 | 80.101 | 0.00 | 0.00 |
| ATOM | 3343 | HD2 | PRO | 217 | 51.152 | 41.588 | 80.078 | 0.00 | 0.00 |
| ATOM | 3344 | HD3 | PRO | 217 | 50.459 | 43.227 | 80.000 | 0.00 | 0.00 |
| ATOM | 3345 | CG  | PRO | 217 | 49.542 | 41.897 | 81.448 | 0.00 | 0.00 |
| ATOM | 3346 | HG2 | PRO | 217 | 50.187 | 41.521 | 82.241 | 0.00 | 0.00 |
| ATOM | 3347 | HG3 | PRO | 217 | 49.193 | 42.881 | 81.762 | 0.00 | 0.00 |
| ATOM | 3348 | CB  | PRO | 217 | 48.349 | 40.998 | 81.284 | 0.00 | 0.00 |
| ATOM | 3349 | HB2 | PRO | 217 | 48.644 | 40.016 | 81.652 | 0.00 | 0.00 |
| ATOM | 3350 | HB3 | PRO | 217 | 47.453 | 41.354 | 81.793 | 0.00 | 0.00 |
| ATOM | 3351 | CA  | PRO | 217 | 48.274 | 40.883 | 79.740 | 0.00 | 0.00 |
| ATOM | 3352 | HA  | PRO | 217 | 48.376 | 39.814 | 79.550 | 0.00 | 0.00 |
| ATOM | 3353 | C   | PRO | 217 | 46.969 | 41.249 | 79.107 | 0.00 | 0.00 |

|      |      |      |     |     |        |        |        |      |      |
|------|------|------|-----|-----|--------|--------|--------|------|------|
| ATOM | 3354 | O    | PRO | 217 | 46.716 | 42.301 | 78.531 | 0.00 | 0.00 |
| ATOM | 3355 | N    | THR | 218 | 46.032 | 40.342 | 79.214 | 0.00 | 0.00 |
| ATOM | 3356 | H    | THR | 218 | 46.314 | 39.538 | 79.757 | 0.00 | 0.00 |
| ATOM | 3357 | CA   | THR | 218 | 44.687 | 40.567 | 78.632 | 0.00 | 0.00 |
| ATOM | 3358 | HA   | THR | 218 | 44.720 | 41.364 | 77.890 | 0.00 | 0.00 |
| ATOM | 3359 | CB   | THR | 218 | 44.243 | 39.249 | 77.898 | 0.00 | 0.00 |
| ATOM | 3360 | HB   | THR | 218 | 45.149 | 38.929 | 77.383 | 0.00 | 0.00 |
| ATOM | 3361 | CG2  | THR | 218 | 43.687 | 38.204 | 78.824 | 0.00 | 0.00 |
| ATOM | 3362 | 1HG2 | THR | 218 | 43.625 | 37.245 | 78.309 | 0.00 | 0.00 |
| ATOM | 3363 | 2HG2 | THR | 218 | 44.269 | 38.086 | 79.738 | 0.00 | 0.00 |
| ATOM | 3364 | 3HG2 | THR | 218 | 42.669 | 38.470 | 79.109 | 0.00 | 0.00 |
| ATOM | 3365 | OG1  | THR | 218 | 43.272 | 39.520 | 76.914 | 0.00 | 0.00 |
| ATOM | 3366 | HG1  | THR | 218 | 43.535 | 40.262 | 76.365 | 0.00 | 0.00 |
| ATOM | 3367 | C    | THR | 218 | 43.666 | 41.082 | 79.701 | 0.00 | 0.00 |
| ATOM | 3368 | O    | THR | 218 | 44.047 | 41.314 | 80.850 | 0.00 | 0.00 |
| ATOM | 3369 | N    | VAL | 219 | 42.308 | 41.189 | 79.410 | 0.00 | 0.00 |
| ATOM | 3370 | H    | VAL | 219 | 41.966 | 40.834 | 78.528 | 0.00 | 0.00 |
| ATOM | 3371 | CA   | VAL | 219 | 41.291 | 41.532 | 80.348 | 0.00 | 0.00 |
| ATOM | 3372 | HA   | VAL | 219 | 41.521 | 42.576 | 80.559 | 0.00 | 0.00 |
| ATOM | 3373 | CB   | VAL | 219 | 39.940 | 41.498 | 79.557 | 0.00 | 0.00 |
| ATOM | 3374 | HB   | VAL | 219 | 40.213 | 42.246 | 78.813 | 0.00 | 0.00 |
| ATOM | 3375 | CG1  | VAL | 219 | 39.543 | 40.195 | 78.920 | 0.00 | 0.00 |
| ATOM | 3376 | 1HG1 | VAL | 219 | 38.821 | 40.406 | 78.131 | 0.00 | 0.00 |
| ATOM | 3377 | 2HG1 | VAL | 219 | 40.321 | 39.690 | 78.348 | 0.00 | 0.00 |
| ATOM | 3378 | 3HG1 | VAL | 219 | 39.152 | 39.539 | 79.697 | 0.00 | 0.00 |
| ATOM | 3379 | CG2  | VAL | 219 | 38.945 | 42.082 | 80.521 | 0.00 | 0.00 |

|      |      |      |     |     |        |        |        |      |      |
|------|------|------|-----|-----|--------|--------|--------|------|------|
| ATOM | 3380 | 1HG2 | VAL | 219 | 38.864 | 41.290 | 81.265 | 0.00 | 0.00 |
| ATOM | 3381 | 2HG2 | VAL | 219 | 39.181 | 43.031 | 81.002 | 0.00 | 0.00 |
| ATOM | 3382 | 3HG2 | VAL | 219 | 38.063 | 42.250 | 79.903 | 0.00 | 0.00 |
| ATOM | 3383 | C    | VAL | 219 | 41.286 | 40.582 | 81.606 | 0.00 | 0.00 |
| ATOM | 3384 | O    | VAL | 219 | 41.298 | 39.352 | 81.439 | 0.00 | 0.00 |
| ATOM | 3385 | N    | GLY | 220 | 41.357 | 41.307 | 82.762 | 0.00 | 0.00 |
| ATOM | 3386 | H    | GLY | 220 | 41.387 | 42.316 | 82.785 | 0.00 | 0.00 |
| ATOM | 3387 | CA   | GLY | 220 | 41.236 | 40.614 | 84.054 | 0.00 | 0.00 |
| ATOM | 3388 | HA2  | GLY | 220 | 40.720 | 41.358 | 84.662 | 0.00 | 0.00 |
| ATOM | 3389 | HA3  | GLY | 220 | 40.728 | 39.651 | 84.011 | 0.00 | 0.00 |
| ATOM | 3390 | C    | GLY | 220 | 42.562 | 40.351 | 84.818 | 0.00 | 0.00 |
| ATOM | 3391 | O    | GLY | 220 | 42.445 | 40.036 | 85.976 | 0.00 | 0.00 |
| ATOM | 3392 | N    | ASP | 221 | 43.741 | 40.444 | 84.182 | 0.00 | 0.00 |
| ATOM | 3393 | H    | ASP | 221 | 43.761 | 40.796 | 83.236 | 0.00 | 0.00 |
| ATOM | 3394 | CA   | ASP | 221 | 45.044 | 40.371 | 84.903 | 0.00 | 0.00 |
| ATOM | 3395 | HA   | ASP | 221 | 44.995 | 39.784 | 85.820 | 0.00 | 0.00 |
| ATOM | 3396 | CB   | ASP | 221 | 46.053 | 39.520 | 84.098 | 0.00 | 0.00 |
| ATOM | 3397 | HB2  | ASP | 221 | 46.227 | 39.879 | 83.084 | 0.00 | 0.00 |
| ATOM | 3398 | HB3  | ASP | 221 | 47.074 | 39.613 | 84.467 | 0.00 | 0.00 |
| ATOM | 3399 | CG   | ASP | 221 | 45.698 | 38.079 | 84.068 | 0.00 | 0.00 |
| ATOM | 3400 | OD1  | ASP | 221 | 45.504 | 37.503 | 85.188 | 0.00 | 0.00 |
| ATOM | 3401 | OD2  | ASP | 221 | 45.577 | 37.479 | 82.998 | 0.00 | 0.00 |
| ATOM | 3402 | C    | ASP | 221 | 45.387 | 41.808 | 85.345 | 0.00 | 0.00 |
| ATOM | 3403 | O    | ASP | 221 | 44.830 | 42.802 | 84.885 | 0.00 | 0.00 |
| ATOM | 3404 | N    | LYS | 222 | 46.325 | 41.992 | 86.286 | 0.00 | 0.00 |
| ATOM | 3405 | H    | LYS | 222 | 46.787 | 41.141 | 86.574 | 0.00 | 0.00 |

|      |      |     |     |     |        |        |        |      |      |
|------|------|-----|-----|-----|--------|--------|--------|------|------|
| ATOM | 3406 | CA  | LYS | 222 | 46.698 | 43.230 | 86.962 | 0.00 | 0.00 |
| ATOM | 3407 | HA  | LYS | 222 | 46.380 | 44.090 | 86.371 | 0.00 | 0.00 |
| ATOM | 3408 | CB  | LYS | 222 | 45.907 | 43.428 | 88.261 | 0.00 | 0.00 |
| ATOM | 3409 | HB2 | LYS | 222 | 46.037 | 44.411 | 88.713 | 0.00 | 0.00 |
| ATOM | 3410 | HB3 | LYS | 222 | 44.837 | 43.476 | 88.057 | 0.00 | 0.00 |
| ATOM | 3411 | CG  | LYS | 222 | 46.109 | 42.283 | 89.315 | 0.00 | 0.00 |
| ATOM | 3412 | HG2 | LYS | 222 | 45.756 | 41.331 | 88.918 | 0.00 | 0.00 |
| ATOM | 3413 | HG3 | LYS | 222 | 47.124 | 42.132 | 89.682 | 0.00 | 0.00 |
| ATOM | 3414 | CD  | LYS | 222 | 45.264 | 42.702 | 90.530 | 0.00 | 0.00 |
| ATOM | 3415 | HD2 | LYS | 222 | 45.834 | 43.466 | 91.059 | 0.00 | 0.00 |
| ATOM | 3416 | HD3 | LYS | 222 | 44.303 | 43.151 | 90.281 | 0.00 | 0.00 |
| ATOM | 3417 | CE  | LYS | 222 | 44.955 | 41.563 | 91.534 | 0.00 | 0.00 |
| ATOM | 3418 | HE2 | LYS | 222 | 44.002 | 41.744 | 92.030 | 0.00 | 0.00 |
| ATOM | 3419 | HE3 | LYS | 222 | 44.902 | 40.650 | 90.941 | 0.00 | 0.00 |
| ATOM | 3420 | NZ  | LYS | 222 | 45.986 | 41.344 | 92.603 | 0.00 | 0.00 |
| ATOM | 3421 | HZ1 | LYS | 222 | 45.683 | 40.632 | 93.252 | 0.00 | 0.00 |
| ATOM | 3422 | HZ2 | LYS | 222 | 46.892 | 41.118 | 92.219 | 0.00 | 0.00 |
| ATOM | 3423 | HZ3 | LYS | 222 | 46.130 | 42.170 | 93.167 | 0.00 | 0.00 |
| ATOM | 3424 | C   | LYS | 222 | 48.206 | 43.395 | 87.159 | 0.00 | 0.00 |
| ATOM | 3425 | O   | LYS | 222 | 48.984 | 42.428 | 87.077 | 0.00 | 0.00 |
| ATOM | 3426 | N   | VAL | 223 | 48.607 | 44.655 | 87.315 | 0.00 | 0.00 |
| ATOM | 3427 | H   | VAL | 223 | 47.874 | 45.324 | 87.508 | 0.00 | 0.00 |
| ATOM | 3428 | CA  | VAL | 223 | 50.021 | 45.221 | 87.209 | 0.00 | 0.00 |
| ATOM | 3429 | HA  | VAL | 223 | 50.727 | 44.419 | 87.427 | 0.00 | 0.00 |
| ATOM | 3430 | CB  | VAL | 223 | 50.369 | 45.624 | 85.726 | 0.00 | 0.00 |
| ATOM | 3431 | HB  | VAL | 223 | 51.456 | 45.699 | 85.713 | 0.00 | 0.00 |

|      |      |      |     |     |        |        |        |      |      |
|------|------|------|-----|-----|--------|--------|--------|------|------|
| ATOM | 3432 | CG1  | VAL | 223 | 50.128 | 44.452 | 84.757 | 0.00 | 0.00 |
| ATOM | 3433 | 1HG1 | VAL | 223 | 49.071 | 44.190 | 84.704 | 0.00 | 0.00 |
| ATOM | 3434 | 2HG1 | VAL | 223 | 50.441 | 44.734 | 83.752 | 0.00 | 0.00 |
| ATOM | 3435 | 3HG1 | VAL | 223 | 50.591 | 43.604 | 85.261 | 0.00 | 0.00 |
| ATOM | 3436 | CG2  | VAL | 223 | 49.785 | 46.907 | 85.173 | 0.00 | 0.00 |
| ATOM | 3437 | 1HG2 | VAL | 223 | 49.614 | 47.652 | 85.950 | 0.00 | 0.00 |
| ATOM | 3438 | 2HG2 | VAL | 223 | 50.444 | 47.363 | 84.434 | 0.00 | 0.00 |
| ATOM | 3439 | 3HG2 | VAL | 223 | 48.879 | 46.557 | 84.678 | 0.00 | 0.00 |
| ATOM | 3440 | C    | VAL | 223 | 50.307 | 46.405 | 88.151 | 0.00 | 0.00 |
| ATOM | 3441 | O    | VAL | 223 | 49.393 | 47.168 | 88.439 | 0.00 | 0.00 |
| ATOM | 3442 | N    | ARG | 224 | 51.602 | 46.434 | 88.622 | 0.00 | 0.00 |
| ATOM | 3443 | H    | ARG | 224 | 52.213 | 45.694 | 88.306 | 0.00 | 0.00 |
| ATOM | 3444 | CA   | ARG | 224 | 52.063 | 47.362 | 89.605 | 0.00 | 0.00 |
| ATOM | 3445 | HA   | ARG | 224 | 51.250 | 47.769 | 90.206 | 0.00 | 0.00 |
| ATOM | 3446 | CB   | ARG | 224 | 53.002 | 46.690 | 90.647 | 0.00 | 0.00 |
| ATOM | 3447 | HB2  | ARG | 224 | 52.421 | 45.858 | 91.044 | 0.00 | 0.00 |
| ATOM | 3448 | HB3  | ARG | 224 | 53.789 | 46.310 | 89.995 | 0.00 | 0.00 |
| ATOM | 3449 | CG   | ARG | 224 | 53.426 | 47.662 | 91.745 | 0.00 | 0.00 |
| ATOM | 3450 | HG2  | ARG | 224 | 54.029 | 48.475 | 91.341 | 0.00 | 0.00 |
| ATOM | 3451 | HG3  | ARG | 224 | 52.485 | 48.086 | 92.096 | 0.00 | 0.00 |
| ATOM | 3452 | CD   | ARG | 224 | 54.127 | 46.869 | 92.807 | 0.00 | 0.00 |
| ATOM | 3453 | HD2  | ARG | 224 | 55.054 | 46.435 | 92.433 | 0.00 | 0.00 |
| ATOM | 3454 | HD3  | ARG | 224 | 53.487 | 46.018 | 93.039 | 0.00 | 0.00 |
| ATOM | 3455 | NE   | ARG | 224 | 54.572 | 47.613 | 93.936 | 0.00 | 0.00 |
| ATOM | 3456 | HE   | ARG | 224 | 54.067 | 48.475 | 94.083 | 0.00 | 0.00 |
| ATOM | 3457 | CZ   | ARG | 224 | 55.365 | 47.280 | 94.940 | 0.00 | 0.00 |



|      |      |      |     |     |        |        |        |      |      |
|------|------|------|-----|-----|--------|--------|--------|------|------|
| ATOM | 3458 | NH1  | ARG | 224 | 56.043 | 46.140 | 95.046 | 0.00 | 0.00 |
| ATOM | 3459 | 1HH1 | ARG | 224 | 56.593 | 45.829 | 95.833 | 0.00 | 0.00 |
| ATOM | 3460 | 2HH1 | ARG | 224 | 55.828 | 45.448 | 94.342 | 0.00 | 0.00 |
| ATOM | 3461 | NH2  | ARG | 224 | 55.637 | 48.147 | 95.874 | 0.00 | 0.00 |
| ATOM | 3462 | 1HH2 | ARG | 224 | 56.212 | 47.948 | 96.680 | 0.00 | 0.00 |
| ATOM | 3463 | 2HH2 | ARG | 224 | 55.171 | 49.040 | 95.813 | 0.00 | 0.00 |
| ATOM | 3464 | C    | ARG | 224 | 52.803 | 48.580 | 88.908 | 0.00 | 0.00 |
| ATOM | 3465 | O    | ARG | 224 | 53.611 | 48.443 | 87.998 | 0.00 | 0.00 |
| ATOM | 3466 | N    | LEU | 225 | 52.509 | 49.783 | 89.411 | 0.00 | 0.00 |
| ATOM | 3467 | H    | LEU | 225 | 52.043 | 49.811 | 90.307 | 0.00 | 0.00 |
| ATOM | 3468 | CA   | LEU | 225 | 53.021 | 51.024 | 88.898 | 0.00 | 0.00 |
| ATOM | 3469 | HA   | LEU | 225 | 53.294 | 51.004 | 87.843 | 0.00 | 0.00 |
| ATOM | 3470 | CB   | LEU | 225 | 52.056 | 52.278 | 88.994 | 0.00 | 0.00 |
| ATOM | 3471 | HB2  | LEU | 225 | 51.838 | 52.523 | 90.034 | 0.00 | 0.00 |
| ATOM | 3472 | HB3  | LEU | 225 | 52.519 | 53.145 | 88.523 | 0.00 | 0.00 |
| ATOM | 3473 | CG   | LEU | 225 | 50.740 | 51.828 | 88.392 | 0.00 | 0.00 |
| ATOM | 3474 | HG   | LEU | 225 | 50.463 | 50.876 | 88.846 | 0.00 | 0.00 |
| ATOM | 3475 | CD1  | LEU | 225 | 49.588 | 52.862 | 88.591 | 0.00 | 0.00 |
| ATOM | 3476 | 1HD1 | LEU | 225 | 49.213 | 52.784 | 89.612 | 0.00 | 0.00 |
| ATOM | 3477 | 2HD1 | LEU | 225 | 49.933 | 53.872 | 88.372 | 0.00 | 0.00 |
| ATOM | 3478 | 3HD1 | LEU | 225 | 48.745 | 52.687 | 87.922 | 0.00 | 0.00 |
| ATOM | 3479 | CD2  | LEU | 225 | 50.853 | 51.763 | 86.903 | 0.00 | 0.00 |
| ATOM | 3480 | 1HD2 | LEU | 225 | 51.552 | 50.966 | 86.650 | 0.00 | 0.00 |
| ATOM | 3481 | 2HD2 | LEU | 225 | 49.905 | 51.486 | 86.442 | 0.00 | 0.00 |
| ATOM | 3482 | 3HD2 | LEU | 225 | 51.258 | 52.665 | 86.444 | 0.00 | 0.00 |
| ATOM | 3483 | C    | LEU | 225 | 54.321 | 51.425 | 89.628 | 0.00 | 0.00 |

|      |      |     |     |     |        |        |        |      |      |
|------|------|-----|-----|-----|--------|--------|--------|------|------|
| ATOM | 3484 | O   | LEU | 225 | 54.224 | 51.916 | 90.752 | 0.00 | 0.00 |
| ATOM | 3485 | N   | ALA | 226 | 55.455 | 51.398 | 88.948 | 0.00 | 0.00 |
| ATOM | 3486 | H   | ALA | 226 | 55.361 | 50.992 | 88.029 | 0.00 | 0.00 |
| ATOM | 3487 | CA  | ALA | 226 | 56.731 | 51.524 | 89.658 | 0.00 | 0.00 |
| ATOM | 3488 | HA  | ALA | 226 | 57.550 | 51.208 | 89.012 | 0.00 | 0.00 |
| ATOM | 3489 | CB  | ALA | 226 | 56.994 | 53.047 | 89.882 | 0.00 | 0.00 |
| ATOM | 3490 | HB1 | ALA | 226 | 57.195 | 53.598 | 88.963 | 0.00 | 0.00 |
| ATOM | 3491 | HB2 | ALA | 226 | 56.103 | 53.497 | 90.319 | 0.00 | 0.00 |
| ATOM | 3492 | HB3 | ALA | 226 | 57.856 | 53.219 | 90.526 | 0.00 | 0.00 |
| ATOM | 3493 | C   | ALA | 226 | 56.965 | 50.675 | 90.895 | 0.00 | 0.00 |
| ATOM | 3494 | O   | ALA | 226 | 56.570 | 49.495 | 90.892 | 0.00 | 0.00 |
| ATOM | 3495 | N   | ASP | 227 | 57.635 | 51.170 | 91.970 | 0.00 | 0.00 |
| ATOM | 3496 | H   | ASP | 227 | 57.695 | 52.176 | 91.920 | 0.00 | 0.00 |
| ATOM | 3497 | CA  | ASP | 227 | 57.742 | 50.557 | 93.311 | 0.00 | 0.00 |
| ATOM | 3498 | HA  | ASP | 227 | 57.497 | 49.496 | 93.334 | 0.00 | 0.00 |
| ATOM | 3499 | CB  | ASP | 227 | 59.213 | 50.800 | 93.739 | 0.00 | 0.00 |
| ATOM | 3500 | HB2 | ASP | 227 | 59.401 | 50.127 | 94.575 | 0.00 | 0.00 |
| ATOM | 3501 | HB3 | ASP | 227 | 59.809 | 50.364 | 92.937 | 0.00 | 0.00 |
| ATOM | 3502 | CG  | ASP | 227 | 59.589 | 52.263 | 94.041 | 0.00 | 0.00 |
| ATOM | 3503 | OD1 | ASP | 227 | 59.109 | 53.207 | 93.380 | 0.00 | 0.00 |
| ATOM | 3504 | OD2 | ASP | 227 | 60.450 | 52.510 | 94.894 | 0.00 | 0.00 |
| ATOM | 3505 | C   | ASP | 227 | 56.679 | 51.149 | 94.285 | 0.00 | 0.00 |
| ATOM | 3506 | O   | ASP | 227 | 56.874 | 51.150 | 95.501 | 0.00 | 0.00 |
| ATOM | 3507 | N   | THR | 228 | 55.712 | 51.881 | 93.714 | 0.00 | 0.00 |
| ATOM | 3508 | H   | THR | 228 | 55.706 | 51.930 | 92.705 | 0.00 | 0.00 |
| ATOM | 3509 | CA  | THR | 228 | 54.584 | 52.376 | 94.618 | 0.00 | 0.00 |

|      |      |      |     |     |        |        |        |      |      |
|------|------|------|-----|-----|--------|--------|--------|------|------|
| ATOM | 3510 | HA   | THR | 228 | 54.960 | 52.811 | 95.544 | 0.00 | 0.00 |
| ATOM | 3511 | CB   | THR | 228 | 53.659 | 53.417 | 93.900 | 0.00 | 0.00 |
| ATOM | 3512 | HB   | THR | 228 | 53.018 | 53.740 | 94.721 | 0.00 | 0.00 |
| ATOM | 3513 | CG2  | THR | 228 | 54.443 | 54.470 | 93.271 | 0.00 | 0.00 |
| ATOM | 3514 | 1HG2 | THR | 228 | 55.067 | 54.991 | 93.997 | 0.00 | 0.00 |
| ATOM | 3515 | 2HG2 | THR | 228 | 55.044 | 54.161 | 92.416 | 0.00 | 0.00 |
| ATOM | 3516 | 3HG2 | THR | 228 | 53.775 | 55.226 | 92.859 | 0.00 | 0.00 |
| ATOM | 3517 | OG1  | THR | 228 | 52.866 | 52.867 | 92.945 | 0.00 | 0.00 |
| ATOM | 3518 | HG1  | THR | 228 | 53.304 | 52.671 | 92.114 | 0.00 | 0.00 |
| ATOM | 3519 | C    | THR | 228 | 53.692 | 51.249 | 95.068 | 0.00 | 0.00 |
| ATOM | 3520 | O    | THR | 228 | 53.844 | 50.155 | 94.646 | 0.00 | 0.00 |
| ATOM | 3521 | N    | GLU | 229 | 52.642 | 51.527 | 95.819 | 0.00 | 0.00 |
| ATOM | 3522 | H    | GLU | 229 | 52.582 | 52.461 | 96.200 | 0.00 | 0.00 |
| ATOM | 3523 | CA   | GLU | 229 | 51.720 | 50.515 | 96.313 | 0.00 | 0.00 |
| ATOM | 3524 | HA   | GLU | 229 | 52.185 | 49.536 | 96.205 | 0.00 | 0.00 |
| ATOM | 3525 | CB   | GLU | 229 | 51.251 | 50.819 | 97.770 | 0.00 | 0.00 |
| ATOM | 3526 | HB2  | GLU | 229 | 51.126 | 51.901 | 97.819 | 0.00 | 0.00 |
| ATOM | 3527 | HB3  | GLU | 229 | 50.257 | 50.404 | 97.934 | 0.00 | 0.00 |
| ATOM | 3528 | CG   | GLU | 229 | 52.298 | 50.294 | 98.792 | 0.00 | 0.00 |
| ATOM | 3529 | HG2  | GLU | 229 | 53.212 | 50.887 | 98.803 | 0.00 | 0.00 |
| ATOM | 3530 | HG3  | GLU | 229 | 51.927 | 50.563 | 99.781 | 0.00 | 0.00 |
| ATOM | 3531 | CD   | GLU | 229 | 52.440 | 48.746 | 98.800 | 0.00 | 0.00 |
| ATOM | 3532 | OE1  | GLU | 229 | 53.517 | 48.271 | 98.473 | 0.00 | 0.00 |
| ATOM | 3533 | OE2  | GLU | 229 | 51.393 | 48.032 | 99.082 | 0.00 | 0.00 |
| ATOM | 3534 | C    | GLU | 229 | 50.528 | 50.315 | 95.368 | 0.00 | 0.00 |
| ATOM | 3535 | O    | GLU | 229 | 49.637 | 49.523 | 95.676 | 0.00 | 0.00 |

|      |      |      |     |     |        |        |        |      |      |
|------|------|------|-----|-----|--------|--------|--------|------|------|
| ATOM | 3536 | N    | LEU | 230 | 50.484 | 51.017 | 94.220 | 0.00 | 0.00 |
| ATOM | 3537 | H    | LEU | 230 | 51.304 | 51.606 | 94.182 | 0.00 | 0.00 |
| ATOM | 3538 | CA   | LEU | 230 | 49.433 | 50.944 | 93.217 | 0.00 | 0.00 |
| ATOM | 3539 | HA   | LEU | 230 | 48.483 | 50.856 | 93.744 | 0.00 | 0.00 |
| ATOM | 3540 | CB   | LEU | 230 | 49.314 | 52.239 | 92.357 | 0.00 | 0.00 |
| ATOM | 3541 | HB2  | LEU | 230 | 50.160 | 52.315 | 91.675 | 0.00 | 0.00 |
| ATOM | 3542 | HB3  | LEU | 230 | 48.415 | 52.120 | 91.752 | 0.00 | 0.00 |
| ATOM | 3543 | CG   | LEU | 230 | 49.316 | 53.565 | 93.119 | 0.00 | 0.00 |
| ATOM | 3544 | HG   | LEU | 230 | 50.295 | 53.646 | 93.591 | 0.00 | 0.00 |
| ATOM | 3545 | CD1  | LEU | 230 | 49.171 | 54.687 | 92.117 | 0.00 | 0.00 |
| ATOM | 3546 | 1HD1 | LEU | 230 | 49.349 | 55.700 | 92.478 | 0.00 | 0.00 |
| ATOM | 3547 | 2HD1 | LEU | 230 | 49.819 | 54.433 | 91.278 | 0.00 | 0.00 |
| ATOM | 3548 | 3HD1 | LEU | 230 | 48.143 | 54.636 | 91.759 | 0.00 | 0.00 |
| ATOM | 3549 | CD2  | LEU | 230 | 48.251 | 53.696 | 94.256 | 0.00 | 0.00 |
| ATOM | 3550 | 1HD2 | LEU | 230 | 47.265 | 53.522 | 93.826 | 0.00 | 0.00 |
| ATOM | 3551 | 2HD2 | LEU | 230 | 48.396 | 52.891 | 94.977 | 0.00 | 0.00 |
| ATOM | 3552 | 3HD2 | LEU | 230 | 48.348 | 54.695 | 94.681 | 0.00 | 0.00 |
| ATOM | 3553 | C    | LEU | 230 | 49.512 | 49.724 | 92.326 | 0.00 | 0.00 |
| ATOM | 3554 | O    | LEU | 230 | 50.506 | 49.447 | 91.590 | 0.00 | 0.00 |
| ATOM | 3555 | N    | TRP | 231 | 48.381 | 48.948 | 92.324 | 0.00 | 0.00 |
| ATOM | 3556 | H    | TRP | 231 | 47.566 | 49.277 | 92.823 | 0.00 | 0.00 |
| ATOM | 3557 | CA   | TRP | 231 | 48.148 | 47.884 | 91.347 | 0.00 | 0.00 |
| ATOM | 3558 | HA   | TRP | 231 | 48.901 | 47.794 | 90.564 | 0.00 | 0.00 |
| ATOM | 3559 | CB   | TRP | 231 | 48.066 | 46.571 | 92.096 | 0.00 | 0.00 |
| ATOM | 3560 | HB2  | TRP | 231 | 47.351 | 46.693 | 92.910 | 0.00 | 0.00 |
| ATOM | 3561 | HB3  | TRP | 231 | 47.660 | 45.866 | 91.371 | 0.00 | 0.00 |

|      |      |      |     |     |        |        |        |      |      |
|------|------|------|-----|-----|--------|--------|--------|------|------|
| ATOM | 3562 | CG   | TRP | 231 | 49.355 | 45.940 | 92.577 | 0.00 | 0.00 |
| ATOM | 3563 | CD1  | TRP | 231 | 49.959 | 46.040 | 93.798 | 0.00 | 0.00 |
| ATOM | 3564 | HD1  | TRP | 231 | 49.520 | 46.677 | 94.551 | 0.00 | 0.00 |
| ATOM | 3565 | NE1  | TRP | 231 | 51.057 | 45.229 | 93.855 | 0.00 | 0.00 |
| ATOM | 3566 | HE1  | TRP | 231 | 51.521 | 45.112 | 94.744 | 0.00 | 0.00 |
| ATOM | 3567 | CE2  | TRP | 231 | 51.252 | 44.478 | 92.689 | 0.00 | 0.00 |
| ATOM | 3568 | CZ2  | TRP | 231 | 52.105 | 43.404 | 92.335 | 0.00 | 0.00 |
| ATOM | 3569 | HZ2  | TRP | 231 | 52.879 | 43.126 | 93.035 | 0.00 | 0.00 |
| ATOM | 3570 | CH2  | TRP | 231 | 51.885 | 42.874 | 91.042 | 0.00 | 0.00 |
| ATOM | 3571 | HH2  | TRP | 231 | 52.559 | 42.076 | 90.768 | 0.00 | 0.00 |
| ATOM | 3572 | CZ3  | TRP | 231 | 50.903 | 43.416 | 90.187 | 0.00 | 0.00 |
| ATOM | 3573 | HZ3  | TRP | 231 | 50.735 | 42.952 | 89.226 | 0.00 | 0.00 |
| ATOM | 3574 | CE3  | TRP | 231 | 50.023 | 44.328 | 90.638 | 0.00 | 0.00 |
| ATOM | 3575 | HE3  | TRP | 231 | 49.283 | 44.661 | 89.926 | 0.00 | 0.00 |
| ATOM | 3576 | CD2  | TRP | 231 | 50.140 | 44.954 | 91.911 | 0.00 | 0.00 |
| ATOM | 3577 | C    | TRP | 231 | 46.812 | 48.036 | 90.599 | 0.00 | 0.00 |
| ATOM | 3578 | O    | TRP | 231 | 45.708 | 47.986 | 91.142 | 0.00 | 0.00 |
| ATOM | 3579 | N    | ILE | 232 | 46.886 | 48.238 | 89.291 | 0.00 | 0.00 |
| ATOM | 3580 | H    | ILE | 232 | 47.750 | 47.958 | 88.850 | 0.00 | 0.00 |
| ATOM | 3581 | CA   | ILE | 232 | 45.705 | 48.440 | 88.372 | 0.00 | 0.00 |
| ATOM | 3582 | HA   | ILE | 232 | 44.843 | 48.716 | 88.978 | 0.00 | 0.00 |
| ATOM | 3583 | CB   | ILE | 232 | 46.075 | 49.623 | 87.489 | 0.00 | 0.00 |
| ATOM | 3584 | HB   | ILE | 232 | 45.185 | 49.659 | 86.861 | 0.00 | 0.00 |
| ATOM | 3585 | CG2  | ILE | 232 | 46.313 | 50.871 | 88.323 | 0.00 | 0.00 |
| ATOM | 3586 | 1HG2 | ILE | 232 | 47.109 | 50.751 | 89.058 | 0.00 | 0.00 |
| ATOM | 3587 | 2HG2 | ILE | 232 | 46.396 | 51.748 | 87.681 | 0.00 | 0.00 |

|      |      |      |     |     |        |        |        |      |      |
|------|------|------|-----|-----|--------|--------|--------|------|------|
| ATOM | 3588 | 3HG2 | ILE | 232 | 45.404 | 51.140 | 88.861 | 0.00 | 0.00 |
| ATOM | 3589 | CG1  | ILE | 232 | 47.303 | 49.443 | 86.616 | 0.00 | 0.00 |
| ATOM | 3590 | 2HG1 | ILE | 232 | 48.234 | 49.444 | 87.183 | 0.00 | 0.00 |
| ATOM | 3591 | 3HG1 | ILE | 232 | 47.282 | 48.485 | 86.096 | 0.00 | 0.00 |
| ATOM | 3592 | CD1  | ILE | 232 | 47.478 | 50.440 | 85.450 | 0.00 | 0.00 |
| ATOM | 3593 | 1HD1 | ILE | 232 | 48.258 | 50.032 | 84.807 | 0.00 | 0.00 |
| ATOM | 3594 | 2HD1 | ILE | 232 | 46.547 | 50.324 | 84.895 | 0.00 | 0.00 |
| ATOM | 3595 | 3HD1 | ILE | 232 | 47.605 | 51.468 | 85.790 | 0.00 | 0.00 |
| ATOM | 3596 | C    | ILE | 232 | 45.391 | 47.184 | 87.661 | 0.00 | 0.00 |
| ATOM | 3597 | O    | ILE | 232 | 46.278 | 46.307 | 87.458 | 0.00 | 0.00 |
| ATOM | 3598 | N    | GLU | 233 | 44.113 | 46.999 | 87.290 | 0.00 | 0.00 |
| ATOM | 3599 | H    | GLU | 233 | 43.523 | 47.758 | 87.601 | 0.00 | 0.00 |
| ATOM | 3600 | CA   | GLU | 233 | 43.593 | 45.821 | 86.606 | 0.00 | 0.00 |
| ATOM | 3601 | HA   | GLU | 233 | 44.359 | 45.046 | 86.574 | 0.00 | 0.00 |
| ATOM | 3602 | CB   | GLU | 233 | 42.425 | 45.174 | 87.418 | 0.00 | 0.00 |
| ATOM | 3603 | HB2  | GLU | 233 | 42.835 | 44.975 | 88.408 | 0.00 | 0.00 |
| ATOM | 3604 | HB3  | GLU | 233 | 41.577 | 45.858 | 87.468 | 0.00 | 0.00 |
| ATOM | 3605 | CG   | GLU | 233 | 41.894 | 43.871 | 86.795 | 0.00 | 0.00 |
| ATOM | 3606 | HG2  | GLU | 233 | 41.447 | 44.217 | 85.862 | 0.00 | 0.00 |
| ATOM | 3607 | HG3  | GLU | 233 | 42.647 | 43.130 | 86.527 | 0.00 | 0.00 |
| ATOM | 3608 | CD   | GLU | 233 | 40.700 | 43.312 | 87.533 | 0.00 | 0.00 |
| ATOM | 3609 | OE1  | GLU | 233 | 40.600 | 43.260 | 88.813 | 0.00 | 0.00 |
| ATOM | 3610 | OE2  | GLU | 233 | 39.760 | 43.053 | 86.766 | 0.00 | 0.00 |
| ATOM | 3611 | C    | GLU | 233 | 43.242 | 46.111 | 85.098 | 0.00 | 0.00 |
| ATOM | 3612 | O    | GLU | 233 | 42.879 | 47.285 | 84.760 | 0.00 | 0.00 |
| ATOM | 3613 | N    | VAL | 234 | 43.440 | 45.150 | 84.184 | 0.00 | 0.00 |

|      |      |      |     |     |        |        |        |      |      |
|------|------|------|-----|-----|--------|--------|--------|------|------|
| ATOM | 3614 | H    | VAL | 234 | 43.920 | 44.300 | 84.442 | 0.00 | 0.00 |
| ATOM | 3615 | CA   | VAL | 234 | 43.031 | 45.365 | 82.797 | 0.00 | 0.00 |
| ATOM | 3616 | HA   | VAL | 234 | 43.253 | 46.392 | 82.504 | 0.00 | 0.00 |
| ATOM | 3617 | CB   | VAL | 234 | 43.847 | 44.490 | 81.791 | 0.00 | 0.00 |
| ATOM | 3618 | HB   | VAL | 234 | 43.684 | 43.474 | 82.149 | 0.00 | 0.00 |
| ATOM | 3619 | CG1  | VAL | 234 | 43.371 | 44.801 | 80.402 | 0.00 | 0.00 |
| ATOM | 3620 | 1HG1 | VAL | 234 | 44.006 | 44.234 | 79.721 | 0.00 | 0.00 |
| ATOM | 3621 | 2HG1 | VAL | 234 | 42.340 | 44.523 | 80.183 | 0.00 | 0.00 |
| ATOM | 3622 | 3HG1 | VAL | 234 | 43.369 | 45.860 | 80.145 | 0.00 | 0.00 |
| ATOM | 3623 | CG2  | VAL | 234 | 45.271 | 44.957 | 81.872 | 0.00 | 0.00 |
| ATOM | 3624 | 1HG2 | VAL | 234 | 45.558 | 45.021 | 82.921 | 0.00 | 0.00 |
| ATOM | 3625 | 2HG2 | VAL | 234 | 45.920 | 44.187 | 81.456 | 0.00 | 0.00 |
| ATOM | 3626 | 3HG2 | VAL | 234 | 45.354 | 45.896 | 81.324 | 0.00 | 0.00 |
| ATOM | 3627 | C    | VAL | 234 | 41.483 | 45.279 | 82.701 | 0.00 | 0.00 |
| ATOM | 3628 | O    | VAL | 234 | 40.868 | 44.180 | 82.932 | 0.00 | 0.00 |
| ATOM | 3629 | N    | GLU | 235 | 40.879 | 46.408 | 82.275 | 0.00 | 0.00 |
| ATOM | 3630 | H    | GLU | 235 | 41.488 | 47.213 | 82.313 | 0.00 | 0.00 |
| ATOM | 3631 | CA   | GLU | 235 | 39.442 | 46.623 | 82.153 | 0.00 | 0.00 |
| ATOM | 3632 | HA   | GLU | 235 | 38.905 | 46.133 | 82.966 | 0.00 | 0.00 |
| ATOM | 3633 | CB   | GLU | 235 | 39.109 | 48.170 | 82.249 | 0.00 | 0.00 |
| ATOM | 3634 | HB2  | GLU | 235 | 39.630 | 48.700 | 81.452 | 0.00 | 0.00 |
| ATOM | 3635 | HB3  | GLU | 235 | 38.064 | 48.414 | 82.054 | 0.00 | 0.00 |
| ATOM | 3636 | CG   | GLU | 235 | 39.404 | 48.632 | 83.662 | 0.00 | 0.00 |
| ATOM | 3637 | HG2  | GLU | 235 | 38.667 | 48.200 | 84.339 | 0.00 | 0.00 |
| ATOM | 3638 | HG3  | GLU | 235 | 40.400 | 48.291 | 83.943 | 0.00 | 0.00 |
| ATOM | 3639 | CD   | GLU | 235 | 39.258 | 50.131 | 83.774 | 0.00 | 0.00 |

|      |      |     |     |     |        |        |        |      |      |
|------|------|-----|-----|-----|--------|--------|--------|------|------|
| ATOM | 3640 | OE1 | GLU | 235 | 39.064 | 50.832 | 82.788 | 0.00 | 0.00 |
| ATOM | 3641 | OE2 | GLU | 235 | 39.342 | 50.579 | 84.881 | 0.00 | 0.00 |
| ATOM | 3642 | C   | GLU | 235 | 38.859 | 46.069 | 80.870 | 0.00 | 0.00 |
| ATOM | 3643 | O   | GLU | 235 | 37.732 | 45.552 | 80.943 | 0.00 | 0.00 |
| ATOM | 3644 | N   | ASP | 236 | 39.649 | 46.065 | 79.759 | 0.00 | 0.00 |
| ATOM | 3645 | H   | ASP | 236 | 40.585 | 46.444 | 79.732 | 0.00 | 0.00 |
| ATOM | 3646 | CA  | ASP | 236 | 39.268 | 45.368 | 78.562 | 0.00 | 0.00 |
| ATOM | 3647 | HA  | ASP | 236 | 39.042 | 44.311 | 78.699 | 0.00 | 0.00 |
| ATOM | 3648 | CB  | ASP | 236 | 38.134 | 46.138 | 77.828 | 0.00 | 0.00 |
| ATOM | 3649 | HB2 | ASP | 236 | 38.393 | 46.361 | 76.793 | 0.00 | 0.00 |
| ATOM | 3650 | HB3 | ASP | 236 | 37.935 | 47.124 | 78.248 | 0.00 | 0.00 |
| ATOM | 3651 | CG  | ASP | 236 | 36.854 | 45.424 | 77.803 | 0.00 | 0.00 |
| ATOM | 3652 | OD1 | ASP | 236 | 35.821 | 46.065 | 77.559 | 0.00 | 0.00 |
| ATOM | 3653 | OD2 | ASP | 236 | 36.831 | 44.176 | 77.930 | 0.00 | 0.00 |
| ATOM | 3654 | C   | ASP | 236 | 40.521 | 45.317 | 77.658 | 0.00 | 0.00 |
| ATOM | 3655 | O   | ASP | 236 | 41.416 | 46.111 | 77.761 | 0.00 | 0.00 |
| ATOM | 3656 | N   | ASP | 237 | 40.499 | 44.407 | 76.657 | 0.00 | 0.00 |
| ATOM | 3657 | H   | ASP | 237 | 39.671 | 43.828 | 76.664 | 0.00 | 0.00 |
| ATOM | 3658 | CA  | ASP | 237 | 41.502 | 44.150 | 75.614 | 0.00 | 0.00 |
| ATOM | 3659 | HA  | ASP | 237 | 42.308 | 44.858 | 75.808 | 0.00 | 0.00 |
| ATOM | 3660 | CB  | ASP | 237 | 42.033 | 42.710 | 75.903 | 0.00 | 0.00 |
| ATOM | 3661 | HB2 | ASP | 237 | 42.327 | 42.727 | 76.952 | 0.00 | 0.00 |
| ATOM | 3662 | HB3 | ASP | 237 | 41.223 | 41.984 | 75.837 | 0.00 | 0.00 |
| ATOM | 3663 | CG  | ASP | 237 | 43.306 | 42.434 | 75.142 | 0.00 | 0.00 |
| ATOM | 3664 | OD1 | ASP | 237 | 43.548 | 43.145 | 74.107 | 0.00 | 0.00 |
| ATOM | 3665 | OD2 | ASP | 237 | 43.976 | 41.466 | 75.454 | 0.00 | 0.00 |



|      |      |      |     |     |        |        |        |      |      |
|------|------|------|-----|-----|--------|--------|--------|------|------|
| ATOM | 3666 | C    | ASP | 237 | 40.959 | 44.229 | 74.212 | 0.00 | 0.00 |
| ATOM | 3667 | O    | ASP | 237 | 40.175 | 43.418 | 73.788 | 0.00 | 0.00 |
| ATOM | 3668 | N    | LEU | 238 | 41.105 | 45.293 | 73.511 | 0.00 | 0.00 |
| ATOM | 3669 | H    | LEU | 238 | 41.805 | 45.958 | 73.807 | 0.00 | 0.00 |
| ATOM | 3670 | CA   | LEU | 238 | 40.330 | 45.637 | 72.285 | 0.00 | 0.00 |
| ATOM | 3671 | HA   | LEU | 238 | 39.335 | 45.292 | 72.566 | 0.00 | 0.00 |
| ATOM | 3672 | CB   | LEU | 238 | 40.242 | 47.166 | 72.167 | 0.00 | 0.00 |
| ATOM | 3673 | HB2  | LEU | 238 | 41.213 | 47.567 | 72.456 | 0.00 | 0.00 |
| ATOM | 3674 | HB3  | LEU | 238 | 40.175 | 47.356 | 71.096 | 0.00 | 0.00 |
| ATOM | 3675 | CG   | LEU | 238 | 39.202 | 47.853 | 72.950 | 0.00 | 0.00 |
| ATOM | 3676 | HG   | LEU | 238 | 38.240 | 47.438 | 72.652 | 0.00 | 0.00 |
| ATOM | 3677 | CD1  | LEU | 238 | 39.243 | 47.665 | 74.513 | 0.00 | 0.00 |
| ATOM | 3678 | 1HD1 | LEU | 238 | 40.304 | 47.786 | 74.729 | 0.00 | 0.00 |
| ATOM | 3679 | 2HD1 | LEU | 238 | 38.622 | 48.420 | 74.995 | 0.00 | 0.00 |
| ATOM | 3680 | 3HD1 | LEU | 238 | 38.892 | 46.640 | 74.634 | 0.00 | 0.00 |
| ATOM | 3681 | CD2  | LEU | 238 | 39.222 | 49.368 | 72.710 | 0.00 | 0.00 |
| ATOM | 3682 | 1HD2 | LEU | 238 | 38.491 | 49.890 | 73.327 | 0.00 | 0.00 |
| ATOM | 3683 | 2HD2 | LEU | 238 | 40.164 | 49.836 | 72.995 | 0.00 | 0.00 |
| ATOM | 3684 | 3HD2 | LEU | 238 | 38.955 | 49.547 | 71.668 | 0.00 | 0.00 |
| ATOM | 3685 | C    | LEU | 238 | 40.690 | 44.852 | 70.990 | 0.00 | 0.00 |
| ATOM | 3686 | O    | LEU | 238 | 40.100 | 45.107 | 69.954 | 0.00 | 0.00 |
| ATOM | 3687 | N    | THR | 239 | 41.531 | 43.854 | 71.100 | 0.00 | 0.00 |
| ATOM | 3688 | H    | THR | 239 | 41.599 | 43.562 | 72.065 | 0.00 | 0.00 |
| ATOM | 3689 | CA   | THR | 239 | 41.975 | 42.929 | 70.083 | 0.00 | 0.00 |
| ATOM | 3690 | HA   | THR | 239 | 42.092 | 43.464 | 69.141 | 0.00 | 0.00 |
| ATOM | 3691 | CB   | THR | 239 | 43.353 | 42.428 | 70.423 | 0.00 | 0.00 |

|      |      |      |     |     |        |        |        |      |      |
|------|------|------|-----|-----|--------|--------|--------|------|------|
| ATOM | 3692 | HB   | THR | 239 | 43.835 | 43.199 | 71.024 | 0.00 | 0.00 |
| ATOM | 3693 | CG2  | THR | 239 | 43.318 | 41.095 | 71.245 | 0.00 | 0.00 |
| ATOM | 3694 | 1HG2 | THR | 239 | 42.871 | 41.262 | 72.225 | 0.00 | 0.00 |
| ATOM | 3695 | 2HG2 | THR | 239 | 42.854 | 40.333 | 70.618 | 0.00 | 0.00 |
| ATOM | 3696 | 3HG2 | THR | 239 | 44.336 | 40.714 | 71.330 | 0.00 | 0.00 |
| ATOM | 3697 | OG1  | THR | 239 | 44.083 | 42.242 | 69.249 | 0.00 | 0.00 |
| ATOM | 3698 | HG1  | THR | 239 | 44.965 | 42.565 | 69.447 | 0.00 | 0.00 |
| ATOM | 3699 | C    | THR | 239 | 41.021 | 41.786 | 69.693 | 0.00 | 0.00 |
| ATOM | 3700 | O    | THR | 239 | 40.030 | 41.543 | 70.332 | 0.00 | 0.00 |
| ATOM | 3701 | N    | THR | 240 | 41.429 | 41.015 | 68.650 | 0.00 | 0.00 |
| ATOM | 3702 | H    | THR | 240 | 42.229 | 41.392 | 68.162 | 0.00 | 0.00 |
| ATOM | 3703 | CA   | THR | 240 | 40.780 | 39.812 | 68.183 | 0.00 | 0.00 |
| ATOM | 3704 | HA   | THR | 240 | 39.921 | 39.512 | 68.783 | 0.00 | 0.00 |
| ATOM | 3705 | CB   | THR | 240 | 40.329 | 39.977 | 66.711 | 0.00 | 0.00 |
| ATOM | 3706 | HB   | THR | 240 | 41.195 | 40.349 | 66.164 | 0.00 | 0.00 |
| ATOM | 3707 | CG2  | THR | 240 | 39.841 | 38.789 | 66.043 | 0.00 | 0.00 |
| ATOM | 3708 | 1HG2 | THR | 240 | 39.023 | 38.232 | 66.501 | 0.00 | 0.00 |
| ATOM | 3709 | 2HG2 | THR | 240 | 39.565 | 39.077 | 65.029 | 0.00 | 0.00 |
| ATOM | 3710 | 3HG2 | THR | 240 | 40.704 | 38.123 | 66.078 | 0.00 | 0.00 |
| ATOM | 3711 | OG1  | THR | 240 | 39.332 | 41.004 | 66.717 | 0.00 | 0.00 |
| ATOM | 3712 | HG1  | THR | 240 | 38.505 | 40.572 | 66.941 | 0.00 | 0.00 |
| ATOM | 3713 | C    | THR | 240 | 41.859 | 38.709 | 68.201 | 0.00 | 0.00 |
| ATOM | 3714 | O    | THR | 240 | 42.912 | 38.759 | 67.557 | 0.00 | 0.00 |
| ATOM | 3715 | N    | TYR | 241 | 41.689 | 37.684 | 69.018 | 0.00 | 0.00 |
| ATOM | 3716 | H    | TYR | 241 | 40.759 | 37.464 | 69.346 | 0.00 | 0.00 |
| ATOM | 3717 | CA   | TYR | 241 | 42.786 | 36.741 | 69.376 | 0.00 | 0.00 |

|      |      |     |     |     |        |        |        |      |      |
|------|------|-----|-----|-----|--------|--------|--------|------|------|
| ATOM | 3718 | HA  | TYR | 241 | 43.652 | 37.306 | 69.721 | 0.00 | 0.00 |
| ATOM | 3719 | CB  | TYR | 241 | 42.426 | 35.845 | 70.600 | 0.00 | 0.00 |
| ATOM | 3720 | HB2 | TYR | 241 | 41.507 | 35.321 | 70.341 | 0.00 | 0.00 |
| ATOM | 3721 | HB3 | TYR | 241 | 43.160 | 35.050 | 70.733 | 0.00 | 0.00 |
| ATOM | 3722 | CG  | TYR | 241 | 42.106 | 36.648 | 71.836 | 0.00 | 0.00 |
| ATOM | 3723 | CD1 | TYR | 241 | 43.047 | 37.277 | 72.650 | 0.00 | 0.00 |
| ATOM | 3724 | HD1 | TYR | 241 | 44.103 | 37.231 | 72.425 | 0.00 | 0.00 |
| ATOM | 3725 | CE1 | TYR | 241 | 42.695 | 37.801 | 73.912 | 0.00 | 0.00 |
| ATOM | 3726 | HE1 | TYR | 241 | 43.433 | 38.227 | 74.576 | 0.00 | 0.00 |
| ATOM | 3727 | CZ  | TYR | 241 | 41.332 | 37.880 | 74.327 | 0.00 | 0.00 |
| ATOM | 3728 | OH  | TYR | 241 | 40.914 | 38.583 | 75.403 | 0.00 | 0.00 |
| ATOM | 3729 | HH  | TYR | 241 | 41.616 | 38.927 | 75.961 | 0.00 | 0.00 |
| ATOM | 3730 | CE2 | TYR | 241 | 40.329 | 37.339 | 73.415 | 0.00 | 0.00 |
| ATOM | 3731 | HE2 | TYR | 241 | 39.270 | 37.521 | 73.526 | 0.00 | 0.00 |
| ATOM | 3732 | CD2 | TYR | 241 | 40.763 | 36.606 | 72.246 | 0.00 | 0.00 |
| ATOM | 3733 | HD2 | TYR | 241 | 40.025 | 36.262 | 71.536 | 0.00 | 0.00 |
| ATOM | 3734 | C   | TYR | 241 | 43.277 | 35.855 | 68.191 | 0.00 | 0.00 |
| ATOM | 3735 | O   | TYR | 241 | 42.398 | 35.251 | 67.535 | 0.00 | 0.00 |
| ATOM | 3736 | N   | GLY | 242 | 44.560 | 35.788 | 67.883 | 0.00 | 0.00 |
| ATOM | 3737 | H   | GLY | 242 | 45.256 | 36.195 | 68.491 | 0.00 | 0.00 |
| ATOM | 3738 | CA  | GLY | 242 | 45.013 | 35.091 | 66.674 | 0.00 | 0.00 |
| ATOM | 3739 | HA2 | GLY | 242 | 45.903 | 34.503 | 66.899 | 0.00 | 0.00 |
| ATOM | 3740 | HA3 | GLY | 242 | 44.305 | 34.345 | 66.313 | 0.00 | 0.00 |
| ATOM | 3741 | C   | GLY | 242 | 45.170 | 36.005 | 65.483 | 0.00 | 0.00 |
| ATOM | 3742 | O   | GLY | 242 | 45.419 | 35.419 | 64.397 | 0.00 | 0.00 |
| ATOM | 3743 | N   | GLU | 243 | 45.176 | 37.334 | 65.606 | 0.00 | 0.00 |

|      |      |     |     |     |        |        |        |      |      |
|------|------|-----|-----|-----|--------|--------|--------|------|------|
| ATOM | 3744 | H   | GLU | 243 | 44.998 | 37.804 | 66.483 | 0.00 | 0.00 |
| ATOM | 3745 | CA  | GLU | 243 | 45.362 | 38.281 | 64.505 | 0.00 | 0.00 |
| ATOM | 3746 | HA  | GLU | 243 | 46.057 | 37.915 | 63.750 | 0.00 | 0.00 |
| ATOM | 3747 | CB  | GLU | 243 | 44.020 | 38.737 | 64.014 | 0.00 | 0.00 |
| ATOM | 3748 | HB2 | GLU | 243 | 43.470 | 39.095 | 64.885 | 0.00 | 0.00 |
| ATOM | 3749 | HB3 | GLU | 243 | 44.039 | 39.682 | 63.472 | 0.00 | 0.00 |
| ATOM | 3750 | CG  | GLU | 243 | 43.050 | 37.784 | 63.296 | 0.00 | 0.00 |
| ATOM | 3751 | HG2 | GLU | 243 | 42.926 | 36.902 | 63.925 | 0.00 | 0.00 |
| ATOM | 3752 | HG3 | GLU | 243 | 42.087 | 38.284 | 63.198 | 0.00 | 0.00 |
| ATOM | 3753 | CD  | GLU | 243 | 43.450 | 37.458 | 61.886 | 0.00 | 0.00 |
| ATOM | 3754 | OE1 | GLU | 243 | 44.413 | 37.947 | 61.336 | 0.00 | 0.00 |
| ATOM | 3755 | OE2 | GLU | 243 | 42.729 | 36.606 | 61.249 | 0.00 | 0.00 |
| ATOM | 3756 | C   | GLU | 243 | 46.174 | 39.530 | 64.918 | 0.00 | 0.00 |
| ATOM | 3757 | O   | GLU | 243 | 46.289 | 40.511 | 64.222 | 0.00 | 0.00 |
| ATOM | 3758 | N   | GLU | 244 | 46.847 | 39.467 | 66.075 | 0.00 | 0.00 |
| ATOM | 3759 | H   | GLU | 244 | 46.803 | 38.587 | 66.569 | 0.00 | 0.00 |
| ATOM | 3760 | CA  | GLU | 244 | 47.610 | 40.533 | 66.720 | 0.00 | 0.00 |
| ATOM | 3761 | HA  | GLU | 244 | 47.059 | 41.472 | 66.663 | 0.00 | 0.00 |
| ATOM | 3762 | CB  | GLU | 244 | 47.990 | 40.123 | 68.158 | 0.00 | 0.00 |
| ATOM | 3763 | HB2 | GLU | 244 | 48.567 | 39.198 | 68.148 | 0.00 | 0.00 |
| ATOM | 3764 | HB3 | GLU | 244 | 48.674 | 40.932 | 68.413 | 0.00 | 0.00 |
| ATOM | 3765 | CG  | GLU | 244 | 46.891 | 39.821 | 69.177 | 0.00 | 0.00 |
| ATOM | 3766 | HG2 | GLU | 244 | 47.342 | 40.047 | 70.143 | 0.00 | 0.00 |
| ATOM | 3767 | HG3 | GLU | 244 | 46.037 | 40.497 | 69.131 | 0.00 | 0.00 |
| ATOM | 3768 | CD  | GLU | 244 | 46.470 | 38.371 | 69.233 | 0.00 | 0.00 |
| ATOM | 3769 | OE1 | GLU | 244 | 46.094 | 37.948 | 70.357 | 0.00 | 0.00 |

|      |      |      |     |     |        |        |        |      |      |
|------|------|------|-----|-----|--------|--------|--------|------|------|
| ATOM | 3770 | OE2  | GLU | 244 | 46.530 | 37.636 | 68.226 | 0.00 | 0.00 |
| ATOM | 3771 | C    | GLU | 244 | 48.842 | 40.792 | 65.938 | 0.00 | 0.00 |
| ATOM | 3772 | O    | GLU | 244 | 49.718 | 39.998 | 65.834 | 0.00 | 0.00 |
| ATOM | 3773 | N    | VAL | 245 | 49.004 | 42.020 | 65.424 | 0.00 | 0.00 |
| ATOM | 3774 | H    | VAL | 245 | 48.493 | 42.779 | 65.851 | 0.00 | 0.00 |
| ATOM | 3775 | CA   | VAL | 245 | 50.029 | 42.397 | 64.441 | 0.00 | 0.00 |
| ATOM | 3776 | HA   | VAL | 245 | 50.398 | 41.444 | 64.059 | 0.00 | 0.00 |
| ATOM | 3777 | CB   | VAL | 245 | 49.341 | 43.185 | 63.281 | 0.00 | 0.00 |
| ATOM | 3778 | HB   | VAL | 245 | 50.157 | 43.349 | 62.577 | 0.00 | 0.00 |
| ATOM | 3779 | CG1  | VAL | 245 | 48.264 | 42.394 | 62.486 | 0.00 | 0.00 |
| ATOM | 3780 | 1HG1 | VAL | 245 | 48.269 | 42.723 | 61.447 | 0.00 | 0.00 |
| ATOM | 3781 | 2HG1 | VAL | 245 | 48.407 | 41.314 | 62.441 | 0.00 | 0.00 |
| ATOM | 3782 | 3HG1 | VAL | 245 | 47.241 | 42.668 | 62.744 | 0.00 | 0.00 |
| ATOM | 3783 | CG2  | VAL | 245 | 48.668 | 44.455 | 63.728 | 0.00 | 0.00 |
| ATOM | 3784 | 1HG2 | VAL | 245 | 48.038 | 44.883 | 62.948 | 0.00 | 0.00 |
| ATOM | 3785 | 2HG2 | VAL | 245 | 48.072 | 44.298 | 64.627 | 0.00 | 0.00 |
| ATOM | 3786 | 3HG2 | VAL | 245 | 49.425 | 45.172 | 64.044 | 0.00 | 0.00 |
| ATOM | 3787 | C    | VAL | 245 | 51.223 | 43.124 | 65.138 | 0.00 | 0.00 |
| ATOM | 3788 | O    | VAL | 245 | 50.962 | 44.058 | 65.904 | 0.00 | 0.00 |
| ATOM | 3789 | N    | LYS | 246 | 52.483 | 42.668 | 64.875 | 0.00 | 0.00 |
| ATOM | 3790 | H    | LYS | 246 | 52.675 | 41.978 | 64.163 | 0.00 | 0.00 |
| ATOM | 3791 | CA   | LYS | 246 | 53.717 | 43.278 | 65.348 | 0.00 | 0.00 |
| ATOM | 3792 | HA   | LYS | 246 | 53.394 | 44.271 | 65.659 | 0.00 | 0.00 |
| ATOM | 3793 | CB   | LYS | 246 | 54.124 | 42.639 | 66.612 | 0.00 | 0.00 |
| ATOM | 3794 | HB2  | LYS | 246 | 54.973 | 43.149 | 67.067 | 0.00 | 0.00 |
| ATOM | 3795 | HB3  | LYS | 246 | 54.604 | 41.696 | 66.353 | 0.00 | 0.00 |

|      |      |     |     |     |        |        |        |      |      |
|------|------|-----|-----|-----|--------|--------|--------|------|------|
| ATOM | 3796 | CG  | LYS | 246 | 53.013 | 42.444 | 67.742 | 0.00 | 0.00 |
| ATOM | 3797 | HG2 | LYS | 246 | 52.698 | 43.407 | 68.142 | 0.00 | 0.00 |
| ATOM | 3798 | HG3 | LYS | 246 | 52.100 | 41.961 | 67.394 | 0.00 | 0.00 |
| ATOM | 3799 | CD  | LYS | 246 | 53.434 | 41.541 | 68.823 | 0.00 | 0.00 |
| ATOM | 3800 | HD2 | LYS | 246 | 52.614 | 41.386 | 69.525 | 0.00 | 0.00 |
| ATOM | 3801 | HD3 | LYS | 246 | 53.644 | 40.533 | 68.464 | 0.00 | 0.00 |
| ATOM | 3802 | CE  | LYS | 246 | 54.671 | 42.052 | 69.594 | 0.00 | 0.00 |
| ATOM | 3803 | HE2 | LYS | 246 | 55.379 | 42.304 | 68.804 | 0.00 | 0.00 |
| ATOM | 3804 | HE3 | LYS | 246 | 54.407 | 42.912 | 70.209 | 0.00 | 0.00 |
| ATOM | 3805 | NZ  | LYS | 246 | 55.235 | 41.030 | 70.514 | 0.00 | 0.00 |
| ATOM | 3806 | HZ1 | LYS | 246 | 55.695 | 40.282 | 70.015 | 0.00 | 0.00 |
| ATOM | 3807 | HZ2 | LYS | 246 | 55.895 | 41.337 | 71.214 | 0.00 | 0.00 |
| ATOM | 3808 | HZ3 | LYS | 246 | 54.413 | 40.652 | 70.963 | 0.00 | 0.00 |
| ATOM | 3809 | C   | LYS | 246 | 54.803 | 43.243 | 64.247 | 0.00 | 0.00 |
| ATOM | 3810 | O   | LYS | 246 | 54.723 | 42.362 | 63.383 | 0.00 | 0.00 |
| ATOM | 3811 | N   | PHE | 247 | 55.781 | 44.252 | 64.287 | 0.00 | 0.00 |
| ATOM | 3812 | H   | PHE | 247 | 55.855 | 44.748 | 65.164 | 0.00 | 0.00 |
| ATOM | 3813 | CA  | PHE | 247 | 56.831 | 44.342 | 63.251 | 0.00 | 0.00 |
| ATOM | 3814 | HA  | PHE | 247 | 56.232 | 44.192 | 62.353 | 0.00 | 0.00 |
| ATOM | 3815 | CB  | PHE | 247 | 57.246 | 45.825 | 63.439 | 0.00 | 0.00 |
| ATOM | 3816 | HB2 | PHE | 247 | 56.400 | 46.507 | 63.362 | 0.00 | 0.00 |
| ATOM | 3817 | HB3 | PHE | 247 | 57.611 | 46.001 | 64.451 | 0.00 | 0.00 |
| ATOM | 3818 | CG  | PHE | 247 | 58.402 | 46.150 | 62.493 | 0.00 | 0.00 |
| ATOM | 3819 | CD1 | PHE | 247 | 58.136 | 46.187 | 61.145 | 0.00 | 0.00 |
| ATOM | 3820 | HD1 | PHE | 247 | 57.116 | 46.214 | 60.791 | 0.00 | 0.00 |
| ATOM | 3821 | CE1 | PHE | 247 | 59.162 | 46.197 | 60.234 | 0.00 | 0.00 |

|      |      |     |     |     |        |        |        |      |      |
|------|------|-----|-----|-----|--------|--------|--------|------|------|
| ATOM | 3822 | HE1 | PHE | 247 | 58.894 | 46.183 | 59.188 | 0.00 | 0.00 |
| ATOM | 3823 | CZ  | PHE | 247 | 60.514 | 46.170 | 60.681 | 0.00 | 0.00 |
| ATOM | 3824 | HZ  | PHE | 247 | 61.242 | 46.238 | 59.886 | 0.00 | 0.00 |
| ATOM | 3825 | CE2 | PHE | 247 | 60.786 | 46.177 | 62.046 | 0.00 | 0.00 |
| ATOM | 3826 | HE2 | PHE | 247 | 61.796 | 46.277 | 62.418 | 0.00 | 0.00 |
| ATOM | 3827 | CD2 | PHE | 247 | 59.730 | 46.165 | 63.017 | 0.00 | 0.00 |
| ATOM | 3828 | HD2 | PHE | 247 | 59.944 | 46.247 | 64.073 | 0.00 | 0.00 |
| ATOM | 3829 | C   | PHE | 247 | 57.916 | 43.289 | 63.246 | 0.00 | 0.00 |
| ATOM | 3830 | O   | PHE | 247 | 58.005 | 42.575 | 64.250 | 0.00 | 0.00 |
| ATOM | 3831 | N   | GLY | 248 | 58.764 | 43.237 | 62.224 | 0.00 | 0.00 |
| ATOM | 3832 | H   | GLY | 248 | 58.551 | 43.721 | 61.364 | 0.00 | 0.00 |
| ATOM | 3833 | CA  | GLY | 248 | 59.984 | 42.364 | 62.157 | 0.00 | 0.00 |
| ATOM | 3834 | HA2 | GLY | 248 | 60.805 | 42.976 | 61.783 | 0.00 | 0.00 |
| ATOM | 3835 | HA3 | GLY | 248 | 60.197 | 42.210 | 63.215 | 0.00 | 0.00 |
| ATOM | 3836 | C   | GLY | 248 | 59.769 | 41.065 | 61.394 | 0.00 | 0.00 |
| ATOM | 3837 | O   | GLY | 248 | 58.671 | 40.492 | 61.407 | 0.00 | 0.00 |
| ATOM | 3838 | N   | GLY | 249 | 60.846 | 40.526 | 60.783 | 0.00 | 0.00 |
| ATOM | 3839 | H   | GLY | 249 | 61.708 | 40.984 | 61.047 | 0.00 | 0.00 |
| ATOM | 3840 | CA  | GLY | 249 | 60.902 | 39.452 | 59.775 | 0.00 | 0.00 |
| ATOM | 3841 | HA2 | GLY | 249 | 60.493 | 39.883 | 58.861 | 0.00 | 0.00 |
| ATOM | 3842 | HA3 | GLY | 249 | 61.900 | 39.123 | 59.489 | 0.00 | 0.00 |
| ATOM | 3843 | C   | GLY | 249 | 60.168 | 38.184 | 60.157 | 0.00 | 0.00 |
| ATOM | 3844 | O   | GLY | 249 | 59.563 | 37.488 | 59.278 | 0.00 | 0.00 |
| ATOM | 3845 | N   | GLY | 250 | 60.189 | 37.915 | 61.468 | 0.00 | 0.00 |
| ATOM | 3846 | H   | GLY | 250 | 60.721 | 38.551 | 62.044 | 0.00 | 0.00 |
| ATOM | 3847 | CA  | GLY | 250 | 59.653 | 36.697 | 62.067 | 0.00 | 0.00 |

|      |      |     |     |     |        |        |        |      |      |
|------|------|-----|-----|-----|--------|--------|--------|------|------|
| ATOM | 3848 | HA2 | GLY | 250 | 59.725 | 35.833 | 61.406 | 0.00 | 0.00 |
| ATOM | 3849 | HA3 | GLY | 250 | 60.107 | 36.403 | 63.014 | 0.00 | 0.00 |
| ATOM | 3850 | C   | GLY | 250 | 58.107 | 36.833 | 62.303 | 0.00 | 0.00 |
| ATOM | 3851 | O   | GLY | 250 | 57.512 | 35.801 | 62.556 | 0.00 | 0.00 |
| ATOM | 3852 | N   | LYS | 251 | 57.589 | 38.121 | 62.343 | 0.00 | 0.00 |
| ATOM | 3853 | H   | LYS | 251 | 58.191 | 38.895 | 62.104 | 0.00 | 0.00 |
| ATOM | 3854 | CA  | LYS | 251 | 56.240 | 38.424 | 62.654 | 0.00 | 0.00 |
| ATOM | 3855 | HA  | LYS | 251 | 55.845 | 37.526 | 63.130 | 0.00 | 0.00 |
| ATOM | 3856 | CB  | LYS | 251 | 56.173 | 39.553 | 63.822 | 0.00 | 0.00 |
| ATOM | 3857 | HB2 | LYS | 251 | 56.693 | 40.383 | 63.343 | 0.00 | 0.00 |
| ATOM | 3858 | HB3 | LYS | 251 | 55.124 | 39.715 | 64.072 | 0.00 | 0.00 |
| ATOM | 3859 | CG  | LYS | 251 | 56.974 | 39.237 | 65.116 | 0.00 | 0.00 |
| ATOM | 3860 | HG2 | LYS | 251 | 56.500 | 39.818 | 65.907 | 0.00 | 0.00 |
| ATOM | 3861 | HG3 | LYS | 251 | 56.722 | 38.244 | 65.487 | 0.00 | 0.00 |
| ATOM | 3862 | CD  | LYS | 251 | 58.525 | 39.461 | 64.983 | 0.00 | 0.00 |
| ATOM | 3863 | HD2 | LYS | 251 | 58.912 | 38.726 | 64.277 | 0.00 | 0.00 |
| ATOM | 3864 | HD3 | LYS | 251 | 58.772 | 40.457 | 64.616 | 0.00 | 0.00 |
| ATOM | 3865 | CE  | LYS | 251 | 59.075 | 39.165 | 66.328 | 0.00 | 0.00 |
| ATOM | 3866 | HE2 | LYS | 251 | 58.894 | 39.992 | 67.014 | 0.00 | 0.00 |
| ATOM | 3867 | HE3 | LYS | 251 | 58.532 | 38.291 | 66.688 | 0.00 | 0.00 |
| ATOM | 3868 | NZ  | LYS | 251 | 60.593 | 39.018 | 66.427 | 0.00 | 0.00 |
| ATOM | 3869 | HZ1 | LYS | 251 | 60.985 | 39.899 | 66.126 | 0.00 | 0.00 |
| ATOM | 3870 | HZ2 | LYS | 251 | 60.909 | 38.811 | 67.363 | 0.00 | 0.00 |
| ATOM | 3871 | HZ3 | LYS | 251 | 60.781 | 38.291 | 65.751 | 0.00 | 0.00 |
| ATOM | 3872 | C   | LYS | 251 | 55.367 | 38.848 | 61.424 | 0.00 | 0.00 |
| ATOM | 3873 | O   | LYS | 251 | 55.613 | 38.349 | 60.335 | 0.00 | 0.00 |



|      |      |      |     |     |        |        |        |      |      |
|------|------|------|-----|-----|--------|--------|--------|------|------|
| ATOM | 3874 | N    | VAL | 252 | 54.547 | 39.839 | 61.544 | 0.00 | 0.00 |
| ATOM | 3875 | H    | VAL | 252 | 54.566 | 40.313 | 62.436 | 0.00 | 0.00 |
| ATOM | 3876 | CA   | VAL | 252 | 53.228 | 39.985 | 60.875 | 0.00 | 0.00 |
| ATOM | 3877 | HA   | VAL | 252 | 52.957 | 39.113 | 60.280 | 0.00 | 0.00 |
| ATOM | 3878 | CB   | VAL | 252 | 52.059 | 40.212 | 61.882 | 0.00 | 0.00 |
| ATOM | 3879 | HB   | VAL | 252 | 52.362 | 41.087 | 62.457 | 0.00 | 0.00 |
| ATOM | 3880 | CG1  | VAL | 252 | 50.726 | 40.510 | 61.062 | 0.00 | 0.00 |
| ATOM | 3881 | 1HG1 | VAL | 252 | 50.581 | 41.562 | 60.817 | 0.00 | 0.00 |
| ATOM | 3882 | 2HG1 | VAL | 252 | 50.678 | 39.967 | 60.118 | 0.00 | 0.00 |
| ATOM | 3883 | 3HG1 | VAL | 252 | 49.849 | 40.227 | 61.645 | 0.00 | 0.00 |
| ATOM | 3884 | CG2  | VAL | 252 | 51.787 | 39.003 | 62.828 | 0.00 | 0.00 |
| ATOM | 3885 | 1HG2 | VAL | 252 | 50.839 | 39.193 | 63.330 | 0.00 | 0.00 |
| ATOM | 3886 | 2HG2 | VAL | 252 | 51.598 | 38.156 | 62.168 | 0.00 | 0.00 |
| ATOM | 3887 | 3HG2 | VAL | 252 | 52.698 | 38.937 | 63.422 | 0.00 | 0.00 |
| ATOM | 3888 | C    | VAL | 252 | 53.181 | 41.257 | 60.033 | 0.00 | 0.00 |
| ATOM | 3889 | O    | VAL | 252 | 52.612 | 41.246 | 58.962 | 0.00 | 0.00 |
| ATOM | 3890 | N    | ILE | 253 | 53.608 | 42.433 | 60.553 | 0.00 | 0.00 |
| ATOM | 3891 | H    | ILE | 253 | 54.158 | 42.369 | 61.398 | 0.00 | 0.00 |
| ATOM | 3892 | CA   | ILE | 253 | 53.537 | 43.733 | 59.859 | 0.00 | 0.00 |
| ATOM | 3893 | HA   | ILE | 253 | 52.588 | 43.781 | 59.326 | 0.00 | 0.00 |
| ATOM | 3894 | CB   | ILE | 253 | 53.478 | 44.966 | 60.795 | 0.00 | 0.00 |
| ATOM | 3895 | HB   | ILE | 253 | 54.397 | 44.939 | 61.381 | 0.00 | 0.00 |
| ATOM | 3896 | CG2  | ILE | 253 | 53.503 | 46.306 | 60.022 | 0.00 | 0.00 |
| ATOM | 3897 | 1HG2 | ILE | 253 | 53.176 | 47.214 | 60.529 | 0.00 | 0.00 |
| ATOM | 3898 | 2HG2 | ILE | 253 | 54.545 | 46.552 | 59.815 | 0.00 | 0.00 |
| ATOM | 3899 | 3HG2 | ILE | 253 | 52.823 | 46.280 | 59.171 | 0.00 | 0.00 |

|      |      |      |     |     |        |        |        |      |      |
|------|------|------|-----|-----|--------|--------|--------|------|------|
| ATOM | 3900 | CG1  | ILE | 253 | 52.221 | 44.924 | 61.669 | 0.00 | 0.00 |
| ATOM | 3901 | 2HG1 | ILE | 253 | 51.308 | 45.082 | 61.095 | 0.00 | 0.00 |
| ATOM | 3902 | 3HG1 | ILE | 253 | 52.128 | 43.939 | 62.128 | 0.00 | 0.00 |
| ATOM | 3903 | CD1  | ILE | 253 | 52.369 | 45.820 | 62.923 | 0.00 | 0.00 |
| ATOM | 3904 | 1HD1 | ILE | 253 | 51.627 | 45.636 | 63.700 | 0.00 | 0.00 |
| ATOM | 3905 | 2HD1 | ILE | 253 | 53.267 | 45.508 | 63.458 | 0.00 | 0.00 |
| ATOM | 3906 | 3HD1 | ILE | 253 | 52.466 | 46.885 | 62.711 | 0.00 | 0.00 |
| ATOM | 3907 | C    | ILE | 253 | 54.638 | 43.759 | 58.853 | 0.00 | 0.00 |
| ATOM | 3908 | O    | ILE | 253 | 55.732 | 44.321 | 59.029 | 0.00 | 0.00 |
| ATOM | 3909 | N    | ARG | 254 | 54.307 | 43.121 | 57.710 | 0.00 | 0.00 |
| ATOM | 3910 | H    | ARG | 254 | 53.469 | 42.558 | 57.724 | 0.00 | 0.00 |
| ATOM | 3911 | CA   | ARG | 254 | 55.107 | 43.095 | 56.412 | 0.00 | 0.00 |
| ATOM | 3912 | HA   | ARG | 254 | 55.825 | 43.901 | 56.264 | 0.00 | 0.00 |
| ATOM | 3913 | CB   | ARG | 254 | 56.087 | 41.838 | 56.397 | 0.00 | 0.00 |
| ATOM | 3914 | HB2  | ARG | 254 | 55.576 | 40.915 | 56.672 | 0.00 | 0.00 |
| ATOM | 3915 | HB3  | ARG | 254 | 56.511 | 41.700 | 55.402 | 0.00 | 0.00 |
| ATOM | 3916 | CG   | ARG | 254 | 57.241 | 41.855 | 57.366 | 0.00 | 0.00 |
| ATOM | 3917 | HG2  | ARG | 254 | 57.784 | 42.777 | 57.157 | 0.00 | 0.00 |
| ATOM | 3918 | HG3  | ARG | 254 | 56.854 | 41.814 | 58.385 | 0.00 | 0.00 |
| ATOM | 3919 | CD   | ARG | 254 | 58.338 | 40.828 | 57.127 | 0.00 | 0.00 |
| ATOM | 3920 | HD2  | ARG | 254 | 58.764 | 40.976 | 56.135 | 0.00 | 0.00 |
| ATOM | 3921 | HD3  | ARG | 254 | 59.133 | 41.159 | 57.795 | 0.00 | 0.00 |
| ATOM | 3922 | NE   | ARG | 254 | 57.945 | 39.392 | 57.166 | 0.00 | 0.00 |
| ATOM | 3923 | HE   | ARG | 254 | 57.154 | 39.213 | 57.768 | 0.00 | 0.00 |
| ATOM | 3924 | CZ   | ARG | 254 | 58.482 | 38.455 | 56.453 | 0.00 | 0.00 |
| ATOM | 3925 | NH1  | ARG | 254 | 59.376 | 38.772 | 55.522 | 0.00 | 0.00 |

|      |      |      |     |     |        |        |        |      |      |
|------|------|------|-----|-----|--------|--------|--------|------|------|
| ATOM | 3926 | 1HH1 | ARG | 254 | 59.712 | 38.048 | 54.903 | 0.00 | 0.00 |
| ATOM | 3927 | 2HH1 | ARG | 254 | 59.979 | 39.569 | 55.674 | 0.00 | 0.00 |
| ATOM | 3928 | NH2  | ARG | 254 | 58.213 | 37.238 | 56.534 | 0.00 | 0.00 |
| ATOM | 3929 | 1HH2 | ARG | 254 | 58.424 | 36.587 | 55.792 | 0.00 | 0.00 |
| ATOM | 3930 | 2HH2 | ARG | 254 | 57.512 | 36.907 | 57.182 | 0.00 | 0.00 |
| ATOM | 3931 | C    | ARG | 254 | 54.238 | 43.038 | 55.130 | 0.00 | 0.00 |
| ATOM | 3932 | O    | ARG | 254 | 52.996 | 42.728 | 55.260 | 0.00 | 0.00 |
| ATOM | 3933 | N    | ASP | 255 | 54.858 | 43.392 | 54.024 | 0.00 | 0.00 |
| ATOM | 3934 | H    | ASP | 255 | 55.813 | 43.716 | 54.069 | 0.00 | 0.00 |
| ATOM | 3935 | CA   | ASP | 255 | 54.355 | 43.201 | 52.645 | 0.00 | 0.00 |
| ATOM | 3936 | HA   | ASP | 255 | 53.443 | 43.788 | 52.541 | 0.00 | 0.00 |
| ATOM | 3937 | CB   | ASP | 255 | 55.329 | 43.767 | 51.571 | 0.00 | 0.00 |
| ATOM | 3938 | HB2  | ASP | 255 | 55.555 | 44.820 | 51.737 | 0.00 | 0.00 |
| ATOM | 3939 | HB3  | ASP | 255 | 56.255 | 43.192 | 51.580 | 0.00 | 0.00 |
| ATOM | 3940 | CG   | ASP | 255 | 54.823 | 43.549 | 50.168 | 0.00 | 0.00 |
| ATOM | 3941 | OD1  | ASP | 255 | 53.651 | 43.807 | 49.885 | 0.00 | 0.00 |
| ATOM | 3942 | OD2  | ASP | 255 | 55.621 | 43.237 | 49.324 | 0.00 | 0.00 |
| ATOM | 3943 | C    | ASP | 255 | 53.975 | 41.743 | 52.431 | 0.00 | 0.00 |
| ATOM | 3944 | O    | ASP | 255 | 54.693 | 40.791 | 52.617 | 0.00 | 0.00 |
| ATOM | 3945 | N    | GLY | 256 | 52.720 | 41.550 | 51.976 | 0.00 | 0.00 |
| ATOM | 3946 | H    | GLY | 256 | 52.053 | 42.307 | 51.936 | 0.00 | 0.00 |
| ATOM | 3947 | CA   | GLY | 256 | 52.214 | 40.138 | 51.803 | 0.00 | 0.00 |
| ATOM | 3948 | HA2  | GLY | 256 | 51.320 | 40.227 | 51.186 | 0.00 | 0.00 |
| ATOM | 3949 | HA3  | GLY | 256 | 52.915 | 39.505 | 51.259 | 0.00 | 0.00 |
| ATOM | 3950 | C    | GLY | 256 | 51.772 | 39.444 | 53.129 | 0.00 | 0.00 |
| ATOM | 3951 | O    | GLY | 256 | 51.732 | 38.215 | 53.188 | 0.00 | 0.00 |

|      |      |     |     |     |        |        |        |      |      |
|------|------|-----|-----|-----|--------|--------|--------|------|------|
| ATOM | 3952 | N   | MET | 257 | 51.513 | 40.253 | 54.194 | 0.00 | 0.00 |
| ATOM | 3953 | H   | MET | 257 | 51.537 | 41.244 | 53.999 | 0.00 | 0.00 |
| ATOM | 3954 | CA  | MET | 257 | 50.959 | 39.800 | 55.485 | 0.00 | 0.00 |
| ATOM | 3955 | HA  | MET | 257 | 50.459 | 38.832 | 55.439 | 0.00 | 0.00 |
| ATOM | 3956 | CB  | MET | 257 | 52.225 | 39.590 | 56.406 | 0.00 | 0.00 |
| ATOM | 3957 | HB2 | MET | 257 | 52.761 | 40.540 | 56.405 | 0.00 | 0.00 |
| ATOM | 3958 | HB3 | MET | 257 | 51.878 | 39.342 | 57.409 | 0.00 | 0.00 |
| ATOM | 3959 | CG  | MET | 257 | 53.340 | 38.580 | 56.048 | 0.00 | 0.00 |
| ATOM | 3960 | HG2 | MET | 257 | 52.873 | 37.677 | 55.656 | 0.00 | 0.00 |
| ATOM | 3961 | HG3 | MET | 257 | 53.777 | 38.944 | 55.118 | 0.00 | 0.00 |
| ATOM | 3962 | SD  | MET | 257 | 54.746 | 38.239 | 57.144 | 0.00 | 0.00 |
| ATOM | 3963 | CE  | MET | 257 | 55.105 | 36.490 | 56.706 | 0.00 | 0.00 |
| ATOM | 3964 | HE1 | MET | 257 | 55.495 | 36.470 | 55.688 | 0.00 | 0.00 |
| ATOM | 3965 | HE2 | MET | 257 | 55.767 | 36.121 | 57.489 | 0.00 | 0.00 |
| ATOM | 3966 | HE3 | MET | 257 | 54.185 | 35.907 | 56.745 | 0.00 | 0.00 |
| ATOM | 3967 | C   | MET | 257 | 49.914 | 40.702 | 56.064 | 0.00 | 0.00 |
| ATOM | 3968 | O   | MET | 257 | 48.894 | 41.070 | 55.500 | 0.00 | 0.00 |
| ATOM | 3969 | N   | GLY | 258 | 50.227 | 41.205 | 57.250 | 0.00 | 0.00 |
| ATOM | 3970 | H   | GLY | 258 | 51.136 | 40.983 | 57.631 | 0.00 | 0.00 |
| ATOM | 3971 | CA  | GLY | 258 | 49.510 | 42.331 | 57.953 | 0.00 | 0.00 |
| ATOM | 3972 | HA2 | GLY | 258 | 48.430 | 42.226 | 58.061 | 0.00 | 0.00 |
| ATOM | 3973 | HA3 | GLY | 258 | 49.786 | 42.243 | 59.003 | 0.00 | 0.00 |
| ATOM | 3974 | C   | GLY | 258 | 49.845 | 43.685 | 57.459 | 0.00 | 0.00 |
| ATOM | 3975 | O   | GLY | 258 | 49.382 | 44.620 | 58.144 | 0.00 | 0.00 |
| ATOM | 3976 | N   | GLN | 259 | 50.564 | 43.849 | 56.300 | 0.00 | 0.00 |
| ATOM | 3977 | H   | GLN | 259 | 51.250 | 43.132 | 56.115 | 0.00 | 0.00 |

|      |      |      |     |     |        |        |        |      |      |
|------|------|------|-----|-----|--------|--------|--------|------|------|
| ATOM | 3978 | CA   | GLN | 259 | 50.435 | 45.087 | 55.596 | 0.00 | 0.00 |
| ATOM | 3979 | HA   | GLN | 259 | 49.998 | 45.882 | 56.200 | 0.00 | 0.00 |
| ATOM | 3980 | CB   | GLN | 259 | 51.818 | 45.614 | 55.146 | 0.00 | 0.00 |
| ATOM | 3981 | HB2  | GLN | 259 | 52.528 | 45.446 | 55.956 | 0.00 | 0.00 |
| ATOM | 3982 | HB3  | GLN | 259 | 52.092 | 44.989 | 54.296 | 0.00 | 0.00 |
| ATOM | 3983 | CG   | GLN | 259 | 51.999 | 47.037 | 54.729 | 0.00 | 0.00 |
| ATOM | 3984 | HG2  | GLN | 259 | 51.305 | 47.226 | 53.911 | 0.00 | 0.00 |
| ATOM | 3985 | HG3  | GLN | 259 | 51.862 | 47.741 | 55.550 | 0.00 | 0.00 |
| ATOM | 3986 | CD   | GLN | 259 | 53.380 | 47.310 | 54.328 | 0.00 | 0.00 |
| ATOM | 3987 | OE1  | GLN | 259 | 54.208 | 47.963 | 54.979 | 0.00 | 0.00 |
| ATOM | 3988 | NE2  | GLN | 259 | 53.749 | 46.817 | 53.169 | 0.00 | 0.00 |
| ATOM | 3989 | 1HE2 | GLN | 259 | 54.694 | 46.862 | 52.816 | 0.00 | 0.00 |
| ATOM | 3990 | 2HE2 | GLN | 259 | 53.043 | 46.543 | 52.501 | 0.00 | 0.00 |
| ATOM | 3991 | C    | GLN | 259 | 49.445 | 44.964 | 54.364 | 0.00 | 0.00 |
| ATOM | 3992 | O    | GLN | 259 | 49.523 | 43.922 | 53.710 | 0.00 | 0.00 |
| ATOM | 3993 | N    | GLY | 260 | 48.639 | 46.021 | 54.183 | 0.00 | 0.00 |
| ATOM | 3994 | H    | GLY | 260 | 48.657 | 46.805 | 54.819 | 0.00 | 0.00 |
| ATOM | 3995 | CA   | GLY | 260 | 47.606 | 46.189 | 53.119 | 0.00 | 0.00 |
| ATOM | 3996 | HA2  | GLY | 260 | 47.312 | 45.201 | 52.765 | 0.00 | 0.00 |
| ATOM | 3997 | HA3  | GLY | 260 | 46.781 | 46.821 | 53.446 | 0.00 | 0.00 |
| ATOM | 3998 | C    | GLY | 260 | 48.169 | 46.810 | 51.877 | 0.00 | 0.00 |
| ATOM | 3999 | O    | GLY | 260 | 49.011 | 47.659 | 51.993 | 0.00 | 0.00 |
| ATOM | 4000 | N    | GLN | 261 | 47.568 | 46.498 | 50.778 | 0.00 | 0.00 |
| ATOM | 4001 | H    | GLN | 261 | 46.737 | 45.941 | 50.919 | 0.00 | 0.00 |
| ATOM | 4002 | CA   | GLN | 261 | 47.999 | 46.679 | 49.387 | 0.00 | 0.00 |
| ATOM | 4003 | HA   | GLN | 261 | 49.076 | 46.841 | 49.337 | 0.00 | 0.00 |

|      |      |      |     |     |        |        |        |      |      |
|------|------|------|-----|-----|--------|--------|--------|------|------|
| ATOM | 4004 | CB   | GLN | 261 | 47.840 | 45.323 | 48.644 | 0.00 | 0.00 |
| ATOM | 4005 | HB2  | GLN | 261 | 46.794 | 45.030 | 48.735 | 0.00 | 0.00 |
| ATOM | 4006 | HB3  | GLN | 261 | 48.087 | 45.422 | 47.587 | 0.00 | 0.00 |
| ATOM | 4007 | CG   | GLN | 261 | 48.722 | 44.257 | 49.229 | 0.00 | 0.00 |
| ATOM | 4008 | HG2  | GLN | 261 | 48.576 | 44.132 | 50.302 | 0.00 | 0.00 |
| ATOM | 4009 | HG3  | GLN | 261 | 48.429 | 43.300 | 48.798 | 0.00 | 0.00 |
| ATOM | 4010 | CD   | GLN | 261 | 50.237 | 44.355 | 48.988 | 0.00 | 0.00 |
| ATOM | 4011 | OE1  | GLN | 261 | 50.809 | 45.281 | 48.508 | 0.00 | 0.00 |
| ATOM | 4012 | NE2  | GLN | 261 | 50.915 | 43.330 | 49.415 | 0.00 | 0.00 |
| ATOM | 4013 | 1HE2 | GLN | 261 | 51.923 | 43.384 | 49.444 | 0.00 | 0.00 |
| ATOM | 4014 | 2HE2 | GLN | 261 | 50.496 | 42.556 | 49.911 | 0.00 | 0.00 |
| ATOM | 4015 | C    | GLN | 261 | 47.380 | 47.900 | 48.663 | 0.00 | 0.00 |
| ATOM | 4016 | O    | GLN | 261 | 47.417 | 48.080 | 47.460 | 0.00 | 0.00 |
| ATOM | 4017 | N    | MET | 262 | 46.776 | 48.763 | 49.509 | 0.00 | 0.00 |
| ATOM | 4018 | H    | MET | 262 | 46.626 | 48.343 | 50.416 | 0.00 | 0.00 |
| ATOM | 4019 | CA   | MET | 262 | 46.119 | 49.964 | 49.114 | 0.00 | 0.00 |
| ATOM | 4020 | HA   | MET | 262 | 45.360 | 49.725 | 48.369 | 0.00 | 0.00 |
| ATOM | 4021 | CB   | MET | 262 | 45.353 | 50.522 | 50.349 | 0.00 | 0.00 |
| ATOM | 4022 | HB2  | MET | 262 | 44.883 | 51.453 | 50.031 | 0.00 | 0.00 |
| ATOM | 4023 | HB3  | MET | 262 | 44.509 | 49.895 | 50.636 | 0.00 | 0.00 |
| ATOM | 4024 | CG   | MET | 262 | 46.084 | 50.783 | 51.603 | 0.00 | 0.00 |
| ATOM | 4025 | HG2  | MET | 262 | 47.105 | 51.073 | 51.354 | 0.00 | 0.00 |
| ATOM | 4026 | HG3  | MET | 262 | 45.664 | 51.632 | 52.141 | 0.00 | 0.00 |
| ATOM | 4027 | SD   | MET | 262 | 46.297 | 49.304 | 52.673 | 0.00 | 0.00 |
| ATOM | 4028 | CE   | MET | 262 | 44.720 | 49.457 | 53.564 | 0.00 | 0.00 |
| ATOM | 4029 | HE1  | MET | 262 | 44.866 | 48.880 | 54.477 | 0.00 | 0.00 |

|      |      |      |     |     |        |        |        |      |      |
|------|------|------|-----|-----|--------|--------|--------|------|------|
| ATOM | 4030 | HE2  | MET | 262 | 44.561 | 50.438 | 54.010 | 0.00 | 0.00 |
| ATOM | 4031 | HE3  | MET | 262 | 43.817 | 49.230 | 52.996 | 0.00 | 0.00 |
| ATOM | 4032 | C    | MET | 262 | 47.128 | 51.113 | 48.660 | 0.00 | 0.00 |
| ATOM | 4033 | O    | MET | 262 | 48.326 | 51.079 | 49.035 | 0.00 | 0.00 |
| ATOM | 4034 | N    | LEU | 263 | 46.609 | 52.102 | 47.897 | 0.00 | 0.00 |
| ATOM | 4035 | H    | LEU | 263 | 45.618 | 52.090 | 47.700 | 0.00 | 0.00 |
| ATOM | 4036 | CA   | LEU | 263 | 47.271 | 53.374 | 47.506 | 0.00 | 0.00 |
| ATOM | 4037 | HA   | LEU | 263 | 48.111 | 53.131 | 46.855 | 0.00 | 0.00 |
| ATOM | 4038 | CB   | LEU | 263 | 46.279 | 54.334 | 46.762 | 0.00 | 0.00 |
| ATOM | 4039 | HB2  | LEU | 263 | 45.447 | 54.472 | 47.452 | 0.00 | 0.00 |
| ATOM | 4040 | HB3  | LEU | 263 | 46.788 | 55.293 | 46.660 | 0.00 | 0.00 |
| ATOM | 4041 | CG   | LEU | 263 | 45.869 | 53.744 | 45.436 | 0.00 | 0.00 |
| ATOM | 4042 | HG   | LEU | 263 | 45.574 | 52.703 | 45.570 | 0.00 | 0.00 |
| ATOM | 4043 | CD1  | LEU | 263 | 44.671 | 54.404 | 44.811 | 0.00 | 0.00 |
| ATOM | 4044 | 1HD1 | LEU | 263 | 43.876 | 54.450 | 45.555 | 0.00 | 0.00 |
| ATOM | 4045 | 2HD1 | LEU | 263 | 44.869 | 55.452 | 44.588 | 0.00 | 0.00 |
| ATOM | 4046 | 3HD1 | LEU | 263 | 44.280 | 53.807 | 43.987 | 0.00 | 0.00 |
| ATOM | 4047 | CD2  | LEU | 263 | 46.997 | 53.757 | 44.417 | 0.00 | 0.00 |
| ATOM | 4048 | 1HD2 | LEU | 263 | 47.243 | 54.817 | 44.345 | 0.00 | 0.00 |
| ATOM | 4049 | 2HD2 | LEU | 263 | 47.939 | 53.286 | 44.698 | 0.00 | 0.00 |
| ATOM | 4050 | 3HD2 | LEU | 263 | 46.569 | 53.367 | 43.494 | 0.00 | 0.00 |
| ATOM | 4051 | C    | LEU | 263 | 47.796 | 54.137 | 48.816 | 0.00 | 0.00 |
| ATOM | 4052 | O    | LEU | 263 | 47.104 | 54.012 | 49.839 | 0.00 | 0.00 |
| ATOM | 4053 | N    | ALA | 264 | 49.053 | 54.599 | 48.857 | 0.00 | 0.00 |
| ATOM | 4054 | H    | ALA | 264 | 49.658 | 54.606 | 48.048 | 0.00 | 0.00 |
| ATOM | 4055 | CA   | ALA | 264 | 49.690 | 54.859 | 50.143 | 0.00 | 0.00 |

|      |      |     |     |     |        |        |        |      |      |
|------|------|-----|-----|-----|--------|--------|--------|------|------|
| ATOM | 4056 | HA  | ALA | 264 | 49.765 | 53.944 | 50.730 | 0.00 | 0.00 |
| ATOM | 4057 | CB  | ALA | 264 | 51.116 | 55.355 | 49.899 | 0.00 | 0.00 |
| ATOM | 4058 | HB1 | ALA | 264 | 51.256 | 56.140 | 49.157 | 0.00 | 0.00 |
| ATOM | 4059 | HB2 | ALA | 264 | 51.576 | 55.719 | 50.818 | 0.00 | 0.00 |
| ATOM | 4060 | HB3 | ALA | 264 | 51.713 | 54.485 | 49.625 | 0.00 | 0.00 |
| ATOM | 4061 | C   | ALA | 264 | 48.923 | 55.860 | 51.092 | 0.00 | 0.00 |
| ATOM | 4062 | O   | ALA | 264 | 48.926 | 55.603 | 52.308 | 0.00 | 0.00 |
| ATOM | 4063 | N   | ALA | 265 | 48.226 | 56.890 | 50.566 | 0.00 | 0.00 |
| ATOM | 4064 | H   | ALA | 265 | 48.257 | 57.060 | 49.571 | 0.00 | 0.00 |
| ATOM | 4065 | CA  | ALA | 265 | 47.454 | 57.865 | 51.316 | 0.00 | 0.00 |
| ATOM | 4066 | HA  | ALA | 265 | 48.023 | 58.323 | 52.125 | 0.00 | 0.00 |
| ATOM | 4067 | CB  | ALA | 265 | 47.025 | 59.046 | 50.439 | 0.00 | 0.00 |
| ATOM | 4068 | HB1 | ALA | 265 | 47.873 | 59.552 | 49.978 | 0.00 | 0.00 |
| ATOM | 4069 | HB2 | ALA | 265 | 46.252 | 58.805 | 49.710 | 0.00 | 0.00 |
| ATOM | 4070 | HB3 | ALA | 265 | 46.577 | 59.868 | 50.997 | 0.00 | 0.00 |
| ATOM | 4071 | C   | ALA | 265 | 46.248 | 57.290 | 51.974 | 0.00 | 0.00 |
| ATOM | 4072 | O   | ALA | 265 | 45.569 | 57.860 | 52.790 | 0.00 | 0.00 |
| ATOM | 4073 | N   | ASP | 266 | 45.968 | 55.996 | 51.762 | 0.00 | 0.00 |
| ATOM | 4074 | H   | ASP | 266 | 46.488 | 55.580 | 51.003 | 0.00 | 0.00 |
| ATOM | 4075 | CA  | ASP | 266 | 44.679 | 55.351 | 52.238 | 0.00 | 0.00 |
| ATOM | 4076 | HA  | ASP | 266 | 43.957 | 56.103 | 52.558 | 0.00 | 0.00 |
| ATOM | 4077 | CB  | ASP | 266 | 44.070 | 54.460 | 51.154 | 0.00 | 0.00 |
| ATOM | 4078 | HB2 | ASP | 266 | 44.853 | 53.976 | 50.570 | 0.00 | 0.00 |
| ATOM | 4079 | HB3 | ASP | 266 | 43.472 | 53.674 | 51.616 | 0.00 | 0.00 |
| ATOM | 4080 | CG  | ASP | 266 | 43.069 | 55.266 | 50.298 | 0.00 | 0.00 |
| ATOM | 4081 | OD1 | ASP | 266 | 41.860 | 54.967 | 50.391 | 0.00 | 0.00 |



|      |      |      |     |     |        |        |        |      |      |
|------|------|------|-----|-----|--------|--------|--------|------|------|
| ATOM | 4082 | OD2  | ASP | 266 | 43.505 | 56.126 | 49.509 | 0.00 | 0.00 |
| ATOM | 4083 | C    | ASP | 266 | 44.956 | 54.455 | 53.466 | 0.00 | 0.00 |
| ATOM | 4084 | O    | ASP | 266 | 44.017 | 53.812 | 53.963 | 0.00 | 0.00 |
| ATOM | 4085 | N    | CYS | 267 | 46.193 | 54.448 | 54.040 | 0.00 | 0.00 |
| ATOM | 4086 | H    | CYS | 267 | 46.890 | 55.076 | 53.667 | 0.00 | 0.00 |
| ATOM | 4087 | CA   | CYS | 267 | 46.517 | 53.821 | 55.360 | 0.00 | 0.00 |
| ATOM | 4088 | HA   | CYS | 267 | 45.595 | 53.494 | 55.840 | 0.00 | 0.00 |
| ATOM | 4089 | CB   | CYS | 267 | 47.231 | 52.533 | 55.057 | 0.00 | 0.00 |
| ATOM | 4090 | HB2  | CYS | 267 | 47.792 | 52.060 | 55.864 | 0.00 | 0.00 |
| ATOM | 4091 | HB3  | CYS | 267 | 46.520 | 51.766 | 54.748 | 0.00 | 0.00 |
| ATOM | 4092 | SG   | CYS | 267 | 48.400 | 52.861 | 53.666 | 0.00 | 0.00 |
| ATOM | 4093 | HG   | CYS | 267 | 47.480 | 53.416 | 52.872 | 0.00 | 0.00 |
| ATOM | 4094 | C    | CYS | 267 | 47.263 | 54.785 | 56.343 | 0.00 | 0.00 |
| ATOM | 4095 | O    | CYS | 267 | 47.636 | 55.897 | 55.955 | 0.00 | 0.00 |
| ATOM | 4096 | N    | VAL | 268 | 47.328 | 54.464 | 57.639 | 0.00 | 0.00 |
| ATOM | 4097 | H    | VAL | 268 | 46.941 | 53.575 | 57.921 | 0.00 | 0.00 |
| ATOM | 4098 | CA   | VAL | 268 | 47.850 | 55.408 | 58.699 | 0.00 | 0.00 |
| ATOM | 4099 | HA   | VAL | 268 | 47.371 | 56.346 | 58.418 | 0.00 | 0.00 |
| ATOM | 4100 | CB   | VAL | 268 | 47.343 | 54.855 | 60.111 | 0.00 | 0.00 |
| ATOM | 4101 | HB   | VAL | 268 | 47.542 | 55.539 | 60.936 | 0.00 | 0.00 |
| ATOM | 4102 | CG1  | VAL | 268 | 45.803 | 54.528 | 60.188 | 0.00 | 0.00 |
| ATOM | 4103 | 1HG1 | VAL | 268 | 45.540 | 54.444 | 61.242 | 0.00 | 0.00 |
| ATOM | 4104 | 2HG1 | VAL | 268 | 45.153 | 55.298 | 59.773 | 0.00 | 0.00 |
| ATOM | 4105 | 3HG1 | VAL | 268 | 45.671 | 53.564 | 59.695 | 0.00 | 0.00 |
| ATOM | 4106 | CG2  | VAL | 268 | 48.142 | 53.619 | 60.565 | 0.00 | 0.00 |
| ATOM | 4107 | 1HG2 | VAL | 268 | 47.951 | 52.715 | 59.986 | 0.00 | 0.00 |

|      |      |      |     |     |        |        |        |      |      |
|------|------|------|-----|-----|--------|--------|--------|------|------|
| ATOM | 4108 | 2HG2 | VAL | 268 | 49.214 | 53.814 | 60.611 | 0.00 | 0.00 |
| ATOM | 4109 | 3HG2 | VAL | 268 | 47.840 | 53.251 | 61.546 | 0.00 | 0.00 |
| ATOM | 4110 | C    | VAL | 268 | 49.347 | 55.608 | 58.670 | 0.00 | 0.00 |
| ATOM | 4111 | O    | VAL | 268 | 50.136 | 54.803 | 58.133 | 0.00 | 0.00 |
| ATOM | 4112 | N    | ASP | 269 | 49.845 | 56.638 | 59.349 | 0.00 | 0.00 |
| ATOM | 4113 | H    | ASP | 269 | 49.163 | 57.191 | 59.848 | 0.00 | 0.00 |
| ATOM | 4114 | CA   | ASP | 269 | 51.228 | 57.141 | 59.211 | 0.00 | 0.00 |
| ATOM | 4115 | HA   | ASP | 269 | 51.576 | 56.835 | 58.225 | 0.00 | 0.00 |
| ATOM | 4116 | CB   | ASP | 269 | 51.342 | 58.620 | 59.227 | 0.00 | 0.00 |
| ATOM | 4117 | HB2  | ASP | 269 | 51.161 | 59.081 | 60.198 | 0.00 | 0.00 |
| ATOM | 4118 | HB3  | ASP | 269 | 52.407 | 58.786 | 59.060 | 0.00 | 0.00 |
| ATOM | 4119 | CG   | ASP | 269 | 50.466 | 59.316 | 58.170 | 0.00 | 0.00 |
| ATOM | 4120 | OD1  | ASP | 269 | 50.391 | 58.839 | 57.018 | 0.00 | 0.00 |
| ATOM | 4121 | OD2  | ASP | 269 | 49.766 | 60.326 | 58.487 | 0.00 | 0.00 |
| ATOM | 4122 | C    | ASP | 269 | 52.090 | 56.484 | 60.337 | 0.00 | 0.00 |
| ATOM | 4123 | O    | ASP | 269 | 53.320 | 56.308 | 60.064 | 0.00 | 0.00 |
| ATOM | 4124 | N    | LEU | 270 | 51.470 | 56.084 | 61.435 | 0.00 | 0.00 |
| ATOM | 4125 | H    | LEU | 270 | 50.579 | 56.513 | 61.642 | 0.00 | 0.00 |
| ATOM | 4126 | CA   | LEU | 270 | 52.091 | 55.469 | 62.545 | 0.00 | 0.00 |
| ATOM | 4127 | HA   | LEU | 270 | 52.828 | 54.708 | 62.286 | 0.00 | 0.00 |
| ATOM | 4128 | CB   | LEU | 270 | 52.808 | 56.515 | 63.344 | 0.00 | 0.00 |
| ATOM | 4129 | HB2  | LEU | 270 | 53.704 | 56.799 | 62.791 | 0.00 | 0.00 |
| ATOM | 4130 | HB3  | LEU | 270 | 52.303 | 57.480 | 63.373 | 0.00 | 0.00 |
| ATOM | 4131 | CG   | LEU | 270 | 53.318 | 56.144 | 64.744 | 0.00 | 0.00 |
| ATOM | 4132 | HG   | LEU | 270 | 52.516 | 55.710 | 65.340 | 0.00 | 0.00 |
| ATOM | 4133 | CD1  | LEU | 270 | 54.525 | 55.180 | 64.675 | 0.00 | 0.00 |

|      |      |      |     |     |        |        |        |      |      |
|------|------|------|-----|-----|--------|--------|--------|------|------|
| ATOM | 4134 | 1HD1 | LEU | 270 | 54.988 | 55.075 | 65.656 | 0.00 | 0.00 |
| ATOM | 4135 | 2HD1 | LEU | 270 | 54.228 | 54.217 | 64.260 | 0.00 | 0.00 |
| ATOM | 4136 | 3HD1 | LEU | 270 | 55.288 | 55.709 | 64.104 | 0.00 | 0.00 |
| ATOM | 4137 | CD2  | LEU | 270 | 53.855 | 57.338 | 65.484 | 0.00 | 0.00 |
| ATOM | 4138 | 1HD2 | LEU | 270 | 52.993 | 58.000 | 65.566 | 0.00 | 0.00 |
| ATOM | 4139 | 2HD2 | LEU | 270 | 54.111 | 56.937 | 66.465 | 0.00 | 0.00 |
| ATOM | 4140 | 3HD2 | LEU | 270 | 54.746 | 57.871 | 65.153 | 0.00 | 0.00 |
| ATOM | 4141 | C    | LEU | 270 | 51.130 | 54.641 | 63.355 | 0.00 | 0.00 |
| ATOM | 4142 | O    | LEU | 270 | 49.957 | 55.043 | 63.509 | 0.00 | 0.00 |
| ATOM | 4143 | N    | VAL | 271 | 51.519 | 53.483 | 63.911 | 0.00 | 0.00 |
| ATOM | 4144 | H    | VAL | 271 | 52.512 | 53.310 | 63.842 | 0.00 | 0.00 |
| ATOM | 4145 | CA   | VAL | 271 | 50.692 | 52.733 | 64.801 | 0.00 | 0.00 |
| ATOM | 4146 | HA   | VAL | 271 | 49.822 | 53.355 | 65.011 | 0.00 | 0.00 |
| ATOM | 4147 | CB   | VAL | 271 | 50.212 | 51.507 | 64.140 | 0.00 | 0.00 |
| ATOM | 4148 | HB   | VAL | 271 | 49.822 | 51.828 | 63.173 | 0.00 | 0.00 |
| ATOM | 4149 | CG1  | VAL | 271 | 51.306 | 50.460 | 63.791 | 0.00 | 0.00 |
| ATOM | 4150 | 1HG1 | VAL | 271 | 51.718 | 50.026 | 64.702 | 0.00 | 0.00 |
| ATOM | 4151 | 2HG1 | VAL | 271 | 50.781 | 49.626 | 63.325 | 0.00 | 0.00 |
| ATOM | 4152 | 3HG1 | VAL | 271 | 52.050 | 50.797 | 63.069 | 0.00 | 0.00 |
| ATOM | 4153 | CG2  | VAL | 271 | 49.132 | 50.828 | 64.879 | 0.00 | 0.00 |
| ATOM | 4154 | 1HG2 | VAL | 271 | 49.434 | 50.426 | 65.846 | 0.00 | 0.00 |
| ATOM | 4155 | 2HG2 | VAL | 271 | 48.384 | 51.577 | 65.140 | 0.00 | 0.00 |
| ATOM | 4156 | 3HG2 | VAL | 271 | 48.638 | 50.035 | 64.318 | 0.00 | 0.00 |
| ATOM | 4157 | C    | VAL | 271 | 51.473 | 52.476 | 66.022 | 0.00 | 0.00 |
| ATOM | 4158 | O    | VAL | 271 | 52.681 | 52.209 | 65.961 | 0.00 | 0.00 |
| ATOM | 4159 | N    | LEU | 272 | 50.833 | 52.525 | 67.222 | 0.00 | 0.00 |

|      |      |      |     |     |        |        |        |      |      |
|------|------|------|-----|-----|--------|--------|--------|------|------|
| ATOM | 4160 | H    | LEU | 272 | 49.880 | 52.858 | 67.245 | 0.00 | 0.00 |
| ATOM | 4161 | CA   | LEU | 272 | 51.453 | 51.884 | 68.425 | 0.00 | 0.00 |
| ATOM | 4162 | HA   | LEU | 272 | 52.509 | 51.664 | 68.264 | 0.00 | 0.00 |
| ATOM | 4163 | CB   | LEU | 272 | 51.464 | 52.965 | 69.589 | 0.00 | 0.00 |
| ATOM | 4164 | HB2  | LEU | 272 | 50.492 | 52.985 | 70.083 | 0.00 | 0.00 |
| ATOM | 4165 | HB3  | LEU | 272 | 52.048 | 52.546 | 70.409 | 0.00 | 0.00 |
| ATOM | 4166 | CG   | LEU | 272 | 51.836 | 54.394 | 69.202 | 0.00 | 0.00 |
| ATOM | 4167 | HG   | LEU | 272 | 52.464 | 54.406 | 68.310 | 0.00 | 0.00 |
| ATOM | 4168 | CD1  | LEU | 272 | 50.569 | 55.179 | 69.046 | 0.00 | 0.00 |
| ATOM | 4169 | 1HD1 | LEU | 272 | 49.848 | 54.674 | 68.403 | 0.00 | 0.00 |
| ATOM | 4170 | 2HD1 | LEU | 272 | 50.145 | 55.212 | 70.049 | 0.00 | 0.00 |
| ATOM | 4171 | 3HD1 | LEU | 272 | 50.780 | 56.192 | 68.702 | 0.00 | 0.00 |
| ATOM | 4172 | CD2  | LEU | 272 | 52.564 | 55.197 | 70.282 | 0.00 | 0.00 |
| ATOM | 4173 | 1HD2 | LEU | 272 | 52.662 | 56.242 | 69.989 | 0.00 | 0.00 |
| ATOM | 4174 | 2HD2 | LEU | 272 | 52.198 | 55.136 | 71.307 | 0.00 | 0.00 |
| ATOM | 4175 | 3HD2 | LEU | 272 | 53.604 | 54.875 | 70.343 | 0.00 | 0.00 |
| ATOM | 4176 | C    | LEU | 272 | 50.683 | 50.545 | 68.734 | 0.00 | 0.00 |
| ATOM | 4177 | O    | LEU | 272 | 49.510 | 50.476 | 69.150 | 0.00 | 0.00 |
| ATOM | 4178 | N    | THR | 273 | 51.336 | 49.372 | 68.610 | 0.00 | 0.00 |
| ATOM | 4179 | H    | THR | 273 | 52.286 | 49.356 | 68.269 | 0.00 | 0.00 |
| ATOM | 4180 | CA   | THR | 273 | 50.791 | 48.050 | 68.723 | 0.00 | 0.00 |
| ATOM | 4181 | HA   | THR | 273 | 49.712 | 48.166 | 68.624 | 0.00 | 0.00 |
| ATOM | 4182 | CB   | THR | 273 | 51.320 | 46.944 | 67.871 | 0.00 | 0.00 |
| ATOM | 4183 | HB   | THR | 273 | 50.995 | 45.960 | 68.208 | 0.00 | 0.00 |
| ATOM | 4184 | CG2  | THR | 273 | 50.921 | 47.094 | 66.422 | 0.00 | 0.00 |
| ATOM | 4185 | 1HG2 | THR | 273 | 50.745 | 48.148 | 66.206 | 0.00 | 0.00 |

|      |      |      |     |     |        |        |        |      |      |
|------|------|------|-----|-----|--------|--------|--------|------|------|
| ATOM | 4186 | 2HG2 | THR | 273 | 51.637 | 46.710 | 65.696 | 0.00 | 0.00 |
| ATOM | 4187 | 3HG2 | THR | 273 | 49.895 | 46.742 | 66.318 | 0.00 | 0.00 |
| ATOM | 4188 | OG1  | THR | 273 | 52.735 | 47.079 | 67.877 | 0.00 | 0.00 |
| ATOM | 4189 | HG1  | THR | 273 | 53.091 | 47.011 | 68.766 | 0.00 | 0.00 |
| ATOM | 4190 | C    | THR | 273 | 50.928 | 47.587 | 70.115 | 0.00 | 0.00 |
| ATOM | 4191 | O    | THR | 273 | 52.015 | 47.581 | 70.691 | 0.00 | 0.00 |
| ATOM | 4192 | N    | ASN | 274 | 49.874 | 46.899 | 70.639 | 0.00 | 0.00 |
| ATOM | 4193 | H    | ASN | 274 | 49.158 | 46.683 | 69.961 | 0.00 | 0.00 |
| ATOM | 4194 | CA   | ASN | 274 | 49.844 | 46.376 | 72.034 | 0.00 | 0.00 |
| ATOM | 4195 | HA   | ASN | 274 | 48.901 | 45.874 | 72.250 | 0.00 | 0.00 |
| ATOM | 4196 | CB   | ASN | 274 | 50.739 | 45.149 | 72.291 | 0.00 | 0.00 |
| ATOM | 4197 | HB2  | ASN | 274 | 51.748 | 45.371 | 72.638 | 0.00 | 0.00 |
| ATOM | 4198 | HB3  | ASN | 274 | 50.320 | 44.586 | 73.125 | 0.00 | 0.00 |
| ATOM | 4199 | CG   | ASN | 274 | 50.935 | 44.227 | 71.114 | 0.00 | 0.00 |
| ATOM | 4200 | OD1  | ASN | 274 | 52.041 | 44.084 | 70.524 | 0.00 | 0.00 |
| ATOM | 4201 | ND2  | ASN | 274 | 49.920 | 43.440 | 70.748 | 0.00 | 0.00 |
| ATOM | 4202 | 1HD2 | ASN | 274 | 49.856 | 43.055 | 69.817 | 0.00 | 0.00 |
| ATOM | 4203 | 2HD2 | ASN | 274 | 49.037 | 43.565 | 71.222 | 0.00 | 0.00 |
| ATOM | 4204 | C    | ASN | 274 | 49.943 | 47.464 | 73.209 | 0.00 | 0.00 |
| ATOM | 4205 | O    | ASN | 274 | 50.175 | 47.060 | 74.392 | 0.00 | 0.00 |
| ATOM | 4206 | N    | ALA | 275 | 49.539 | 48.750 | 73.031 | 0.00 | 0.00 |
| ATOM | 4207 | H    | ALA | 275 | 49.202 | 49.053 | 72.129 | 0.00 | 0.00 |
| ATOM | 4208 | CA   | ALA | 275 | 49.713 | 49.804 | 74.034 | 0.00 | 0.00 |
| ATOM | 4209 | HA   | ALA | 275 | 50.737 | 49.766 | 74.407 | 0.00 | 0.00 |
| ATOM | 4210 | CB   | ALA | 275 | 49.534 | 51.213 | 73.356 | 0.00 | 0.00 |
| ATOM | 4211 | HB1  | ALA | 275 | 50.157 | 51.428 | 72.488 | 0.00 | 0.00 |

|      |      |      |     |     |        |        |        |      |      |
|------|------|------|-----|-----|--------|--------|--------|------|------|
| ATOM | 4212 | HB2  | ALA | 275 | 48.532 | 51.230 | 72.927 | 0.00 | 0.00 |
| ATOM | 4213 | HB3  | ALA | 275 | 49.711 | 52.034 | 74.050 | 0.00 | 0.00 |
| ATOM | 4214 | C    | ALA | 275 | 48.742 | 49.769 | 75.227 | 0.00 | 0.00 |
| ATOM | 4215 | O    | ALA | 275 | 47.560 | 49.677 | 75.010 | 0.00 | 0.00 |
| ATOM | 4216 | N    | LEU | 276 | 49.152 | 49.854 | 76.441 | 0.00 | 0.00 |
| ATOM | 4217 | H    | LEU | 276 | 50.149 | 49.883 | 76.601 | 0.00 | 0.00 |
| ATOM | 4218 | CA   | LEU | 276 | 48.302 | 50.019 | 77.647 | 0.00 | 0.00 |
| ATOM | 4219 | HA   | LEU | 276 | 47.384 | 49.470 | 77.435 | 0.00 | 0.00 |
| ATOM | 4220 | CB   | LEU | 276 | 48.856 | 49.199 | 78.771 | 0.00 | 0.00 |
| ATOM | 4221 | HB2  | LEU | 276 | 49.020 | 48.145 | 78.545 | 0.00 | 0.00 |
| ATOM | 4222 | HB3  | LEU | 276 | 49.814 | 49.674 | 78.985 | 0.00 | 0.00 |
| ATOM | 4223 | CG   | LEU | 276 | 47.994 | 49.124 | 80.134 | 0.00 | 0.00 |
| ATOM | 4224 | HG   | LEU | 276 | 48.237 | 50.023 | 80.701 | 0.00 | 0.00 |
| ATOM | 4225 | CD1  | LEU | 276 | 46.453 | 48.966 | 79.819 | 0.00 | 0.00 |
| ATOM | 4226 | 1HD1 | LEU | 276 | 46.131 | 49.927 | 79.419 | 0.00 | 0.00 |
| ATOM | 4227 | 2HD1 | LEU | 276 | 46.306 | 48.168 | 79.092 | 0.00 | 0.00 |
| ATOM | 4228 | 3HD1 | LEU | 276 | 45.989 | 48.693 | 80.767 | 0.00 | 0.00 |
| ATOM | 4229 | CD2  | LEU | 276 | 48.428 | 47.832 | 80.899 | 0.00 | 0.00 |
| ATOM | 4230 | 1HD2 | LEU | 276 | 48.465 | 47.011 | 80.184 | 0.00 | 0.00 |
| ATOM | 4231 | 2HD2 | LEU | 276 | 49.424 | 48.061 | 81.277 | 0.00 | 0.00 |
| ATOM | 4232 | 3HD2 | LEU | 276 | 47.781 | 47.585 | 81.741 | 0.00 | 0.00 |
| ATOM | 4233 | C    | LEU | 276 | 47.907 | 51.467 | 77.878 | 0.00 | 0.00 |
| ATOM | 4234 | O    | LEU | 276 | 48.682 | 52.265 | 78.327 | 0.00 | 0.00 |
| ATOM | 4235 | N    | ILE | 277 | 46.615 | 51.739 | 77.764 | 0.00 | 0.00 |
| ATOM | 4236 | H    | ILE | 277 | 45.985 | 50.987 | 77.525 | 0.00 | 0.00 |
| ATOM | 4237 | CA   | ILE | 277 | 46.045 | 53.049 | 78.117 | 0.00 | 0.00 |

|      |      |      |     |     |        |        |        |      |      |
|------|------|------|-----|-----|--------|--------|--------|------|------|
| ATOM | 4238 | HA   | ILE | 277 | 46.651 | 53.836 | 77.666 | 0.00 | 0.00 |
| ATOM | 4239 | CB   | ILE | 277 | 44.593 | 53.311 | 77.554 | 0.00 | 0.00 |
| ATOM | 4240 | HB   | ILE | 277 | 43.981 | 52.463 | 77.861 | 0.00 | 0.00 |
| ATOM | 4241 | CG2  | ILE | 277 | 44.003 | 54.647 | 78.003 | 0.00 | 0.00 |
| ATOM | 4242 | 1HG2 | ILE | 277 | 42.955 | 54.667 | 77.704 | 0.00 | 0.00 |
| ATOM | 4243 | 2HG2 | ILE | 277 | 44.051 | 54.705 | 79.090 | 0.00 | 0.00 |
| ATOM | 4244 | 3HG2 | ILE | 277 | 44.522 | 55.489 | 77.545 | 0.00 | 0.00 |
| ATOM | 4245 | CG1  | ILE | 277 | 44.600 | 53.275 | 75.999 | 0.00 | 0.00 |
| ATOM | 4246 | 2HG1 | ILE | 277 | 43.717 | 53.824 | 75.670 | 0.00 | 0.00 |
| ATOM | 4247 | 3HG1 | ILE | 277 | 45.530 | 53.747 | 75.682 | 0.00 | 0.00 |
| ATOM | 4248 | CD1  | ILE | 277 | 44.504 | 51.977 | 75.215 | 0.00 | 0.00 |
| ATOM | 4249 | 1HD1 | ILE | 277 | 44.996 | 51.176 | 75.767 | 0.00 | 0.00 |
| ATOM | 4250 | 2HD1 | ILE | 277 | 43.471 | 51.687 | 75.026 | 0.00 | 0.00 |
| ATOM | 4251 | 3HD1 | ILE | 277 | 45.081 | 52.112 | 74.300 | 0.00 | 0.00 |
| ATOM | 4252 | C    | ILE | 277 | 46.060 | 53.263 | 79.638 | 0.00 | 0.00 |
| ATOM | 4253 | O    | ILE | 277 | 45.416 | 52.449 | 80.316 | 0.00 | 0.00 |
| ATOM | 4254 | N    | VAL | 278 | 46.751 | 54.265 | 80.148 | 0.00 | 0.00 |
| ATOM | 4255 | H    | VAL | 278 | 47.413 | 54.770 | 79.576 | 0.00 | 0.00 |
| ATOM | 4256 | CA   | VAL | 278 | 46.343 | 54.889 | 81.462 | 0.00 | 0.00 |
| ATOM | 4257 | HA   | VAL | 278 | 45.412 | 54.411 | 81.767 | 0.00 | 0.00 |
| ATOM | 4258 | CB   | VAL | 278 | 47.365 | 54.521 | 82.611 | 0.00 | 0.00 |
| ATOM | 4259 | HB   | VAL | 278 | 48.360 | 54.944 | 82.474 | 0.00 | 0.00 |
| ATOM | 4260 | CG1  | VAL | 278 | 46.762 | 54.986 | 83.894 | 0.00 | 0.00 |
| ATOM | 4261 | 1HG1 | VAL | 278 | 46.292 | 55.960 | 83.755 | 0.00 | 0.00 |
| ATOM | 4262 | 2HG1 | VAL | 278 | 45.950 | 54.288 | 84.097 | 0.00 | 0.00 |
| ATOM | 4263 | 3HG1 | VAL | 278 | 47.468 | 55.006 | 84.725 | 0.00 | 0.00 |

|      |      |      |     |     |        |        |        |      |      |
|------|------|------|-----|-----|--------|--------|--------|------|------|
| ATOM | 4264 | CG2  | VAL | 278 | 47.648 | 53.044 | 82.834 | 0.00 | 0.00 |
| ATOM | 4265 | 1HG2 | VAL | 278 | 46.785 | 52.468 | 83.168 | 0.00 | 0.00 |
| ATOM | 4266 | 2HG2 | VAL | 278 | 48.085 | 52.585 | 81.947 | 0.00 | 0.00 |
| ATOM | 4267 | 3HG2 | VAL | 278 | 48.378 | 53.000 | 83.642 | 0.00 | 0.00 |
| ATOM | 4268 | C    | VAL | 278 | 46.169 | 56.370 | 81.225 | 0.00 | 0.00 |
| ATOM | 4269 | O    | VAL | 278 | 47.081 | 57.163 | 81.051 | 0.00 | 0.00 |
| ATOM | 4270 | N    | ASP | 279 | 44.912 | 56.762 | 80.968 | 0.00 | 0.00 |
| ATOM | 4271 | H    | ASP | 279 | 44.228 | 56.020 | 81.007 | 0.00 | 0.00 |
| ATOM | 4272 | CA   | ASP | 279 | 44.431 | 58.112 | 80.780 | 0.00 | 0.00 |
| ATOM | 4273 | HA   | ASP | 279 | 44.935 | 58.871 | 81.379 | 0.00 | 0.00 |
| ATOM | 4274 | CB   | ASP | 279 | 44.568 | 58.492 | 79.264 | 0.00 | 0.00 |
| ATOM | 4275 | HB2  | ASP | 279 | 44.002 | 57.736 | 78.719 | 0.00 | 0.00 |
| ATOM | 4276 | HB3  | ASP | 279 | 45.608 | 58.538 | 78.942 | 0.00 | 0.00 |
| ATOM | 4277 | CG   | ASP | 279 | 44.004 | 59.868 | 79.092 | 0.00 | 0.00 |
| ATOM | 4278 | OD1  | ASP | 279 | 44.295 | 60.841 | 79.835 | 0.00 | 0.00 |
| ATOM | 4279 | OD2  | ASP | 279 | 43.313 | 59.981 | 78.057 | 0.00 | 0.00 |
| ATOM | 4280 | C    | ASP | 279 | 42.942 | 58.097 | 81.199 | 0.00 | 0.00 |
| ATOM | 4281 | O    | ASP | 279 | 42.393 | 57.076 | 81.572 | 0.00 | 0.00 |
| ATOM | 4282 | N    | HIE | 280 | 42.200 | 59.219 | 81.387 | 0.00 | 0.00 |
| ATOM | 4283 | H    | HIE | 280 | 42.539 | 60.086 | 80.996 | 0.00 | 0.00 |
| ATOM | 4284 | CA   | HIE | 280 | 41.061 | 59.396 | 82.358 | 0.00 | 0.00 |
| ATOM | 4285 | HA   | HIE | 280 | 41.432 | 59.321 | 83.380 | 0.00 | 0.00 |
| ATOM | 4286 | CB   | HIE | 280 | 40.578 | 60.828 | 82.228 | 0.00 | 0.00 |
| ATOM | 4287 | HB2  | HIE | 280 | 39.932 | 61.038 | 83.081 | 0.00 | 0.00 |
| ATOM | 4288 | HB3  | HIE | 280 | 41.400 | 61.518 | 82.419 | 0.00 | 0.00 |
| ATOM | 4289 | CG   | HIE | 280 | 39.879 | 61.240 | 81.012 | 0.00 | 0.00 |



|      |      |     |     |     |        |        |        |      |      |
|------|------|-----|-----|-----|--------|--------|--------|------|------|
| ATOM | 4290 | ND1 | HIE | 280 | 38.525 | 61.136 | 80.742 | 0.00 | 0.00 |
| ATOM | 4291 | CE1 | HIE | 280 | 38.406 | 61.627 | 79.495 | 0.00 | 0.00 |
| ATOM | 4292 | HE1 | HIE | 280 | 37.463 | 61.818 | 79.003 | 0.00 | 0.00 |
| ATOM | 4293 | NE2 | HIE | 280 | 39.603 | 61.979 | 78.993 | 0.00 | 0.00 |
| ATOM | 4294 | HE2 | HIE | 280 | 39.750 | 62.340 | 78.062 | 0.00 | 0.00 |
| ATOM | 4295 | CD2 | HIE | 280 | 40.532 | 61.832 | 80.009 | 0.00 | 0.00 |
| ATOM | 4296 | HD2 | HIE | 280 | 41.584 | 62.039 | 79.885 | 0.00 | 0.00 |
| ATOM | 4297 | C   | HIE | 280 | 39.872 | 58.468 | 82.114 | 0.00 | 0.00 |
| ATOM | 4298 | O   | HIE | 280 | 39.060 | 58.194 | 82.996 | 0.00 | 0.00 |
| ATOM | 4299 | N   | TRP | 281 | 39.707 | 57.983 | 80.911 | 0.00 | 0.00 |
| ATOM | 4300 | H   | TRP | 281 | 40.479 | 58.106 | 80.271 | 0.00 | 0.00 |
| ATOM | 4301 | CA  | TRP | 281 | 38.600 | 57.161 | 80.424 | 0.00 | 0.00 |
| ATOM | 4302 | HA  | TRP | 281 | 37.667 | 57.324 | 80.962 | 0.00 | 0.00 |
| ATOM | 4303 | CB  | TRP | 281 | 38.308 | 57.644 | 79.017 | 0.00 | 0.00 |
| ATOM | 4304 | HB2 | TRP | 281 | 37.491 | 57.056 | 78.599 | 0.00 | 0.00 |
| ATOM | 4305 | HB3 | TRP | 281 | 37.984 | 58.684 | 79.061 | 0.00 | 0.00 |
| ATOM | 4306 | CG  | TRP | 281 | 39.440 | 57.534 | 78.152 | 0.00 | 0.00 |
| ATOM | 4307 | CD1 | TRP | 281 | 40.245 | 58.582 | 77.917 | 0.00 | 0.00 |
| ATOM | 4308 | HD1 | TRP | 281 | 39.972 | 59.576 | 78.240 | 0.00 | 0.00 |
| ATOM | 4309 | NE1 | TRP | 281 | 41.236 | 58.289 | 76.992 | 0.00 | 0.00 |
| ATOM | 4310 | HE1 | TRP | 281 | 42.054 | 58.851 | 76.801 | 0.00 | 0.00 |
| ATOM | 4311 | CE2 | TRP | 281 | 41.023 | 56.907 | 76.609 | 0.00 | 0.00 |
| ATOM | 4312 | CZ2 | TRP | 281 | 41.715 | 56.130 | 75.696 | 0.00 | 0.00 |
| ATOM | 4313 | HZ2 | TRP | 281 | 42.539 | 56.585 | 75.166 | 0.00 | 0.00 |
| ATOM | 4314 | CH2 | TRP | 281 | 41.155 | 54.903 | 75.366 | 0.00 | 0.00 |
| ATOM | 4315 | HH2 | TRP | 281 | 41.601 | 54.309 | 74.582 | 0.00 | 0.00 |

|      |      |      |     |     |        |        |        |      |      |
|------|------|------|-----|-----|--------|--------|--------|------|------|
| ATOM | 4316 | CZ3  | TRP | 281 | 40.178 | 54.301 | 76.163 | 0.00 | 0.00 |
| ATOM | 4317 | HZ3  | TRP | 281 | 39.785 | 53.353 | 75.826 | 0.00 | 0.00 |
| ATOM | 4318 | CE3  | TRP | 281 | 39.486 | 55.106 | 77.084 | 0.00 | 0.00 |
| ATOM | 4319 | HE3  | TRP | 281 | 38.597 | 54.785 | 77.607 | 0.00 | 0.00 |
| ATOM | 4320 | CD2  | TRP | 281 | 39.891 | 56.421 | 77.301 | 0.00 | 0.00 |
| ATOM | 4321 | C    | TRP | 281 | 38.818 | 55.655 | 80.529 | 0.00 | 0.00 |
| ATOM | 4322 | O    | TRP | 281 | 37.817 | 54.934 | 80.410 | 0.00 | 0.00 |
| ATOM | 4323 | N    | GLY | 282 | 40.076 | 55.201 | 80.794 | 0.00 | 0.00 |
| ATOM | 4324 | H    | GLY | 282 | 40.887 | 55.798 | 80.875 | 0.00 | 0.00 |
| ATOM | 4325 | CA   | GLY | 282 | 40.190 | 53.793 | 81.034 | 0.00 | 0.00 |
| ATOM | 4326 | HA2  | GLY | 282 | 39.611 | 53.521 | 81.917 | 0.00 | 0.00 |
| ATOM | 4327 | HA3  | GLY | 282 | 39.704 | 53.200 | 80.259 | 0.00 | 0.00 |
| ATOM | 4328 | C    | GLY | 282 | 41.577 | 53.241 | 81.228 | 0.00 | 0.00 |
| ATOM | 4329 | O    | GLY | 282 | 42.567 | 54.008 | 81.190 | 0.00 | 0.00 |
| ATOM | 4330 | N    | ILE | 283 | 41.560 | 51.971 | 81.569 | 0.00 | 0.00 |
| ATOM | 4331 | H    | ILE | 283 | 40.672 | 51.495 | 81.489 | 0.00 | 0.00 |
| ATOM | 4332 | CA   | ILE | 283 | 42.721 | 51.139 | 81.799 | 0.00 | 0.00 |
| ATOM | 4333 | HA   | ILE | 283 | 43.669 | 51.605 | 81.530 | 0.00 | 0.00 |
| ATOM | 4334 | CB   | ILE | 283 | 42.919 | 50.791 | 83.309 | 0.00 | 0.00 |
| ATOM | 4335 | HB   | ILE | 283 | 42.017 | 50.339 | 83.721 | 0.00 | 0.00 |
| ATOM | 4336 | CG2  | ILE | 283 | 44.192 | 49.942 | 83.380 | 0.00 | 0.00 |
| ATOM | 4337 | 1HG2 | ILE | 283 | 44.122 | 48.964 | 82.905 | 0.00 | 0.00 |
| ATOM | 4338 | 2HG2 | ILE | 283 | 45.074 | 50.457 | 83.001 | 0.00 | 0.00 |
| ATOM | 4339 | 3HG2 | ILE | 283 | 44.355 | 49.797 | 84.448 | 0.00 | 0.00 |
| ATOM | 4340 | CG1  | ILE | 283 | 43.080 | 52.183 | 84.015 | 0.00 | 0.00 |
| ATOM | 4341 | 2HG1 | ILE | 283 | 43.570 | 52.890 | 83.345 | 0.00 | 0.00 |

|      |      |      |     |     |        |        |        |      |      |
|------|------|------|-----|-----|--------|--------|--------|------|------|
| ATOM | 4342 | 3HG1 | ILE | 283 | 42.077 | 52.610 | 84.013 | 0.00 | 0.00 |
| ATOM | 4343 | CD1  | ILE | 283 | 43.880 | 52.327 | 85.427 | 0.00 | 0.00 |
| ATOM | 4344 | 1HD1 | ILE | 283 | 43.566 | 51.610 | 86.185 | 0.00 | 0.00 |
| ATOM | 4345 | 2HD1 | ILE | 283 | 44.953 | 52.217 | 85.265 | 0.00 | 0.00 |
| ATOM | 4346 | 3HD1 | ILE | 283 | 43.691 | 53.338 | 85.790 | 0.00 | 0.00 |
| ATOM | 4347 | C    | ILE | 283 | 42.435 | 49.938 | 80.914 | 0.00 | 0.00 |
| ATOM | 4348 | O    | ILE | 283 | 42.170 | 48.809 | 81.440 | 0.00 | 0.00 |
| ATOM | 4349 | N    | VAL | 284 | 42.422 | 50.167 | 79.606 | 0.00 | 0.00 |
| ATOM | 4350 | H    | VAL | 284 | 42.880 | 51.029 | 79.347 | 0.00 | 0.00 |
| ATOM | 4351 | CA   | VAL | 284 | 42.203 | 49.221 | 78.504 | 0.00 | 0.00 |
| ATOM | 4352 | HA   | VAL | 284 | 42.048 | 48.217 | 78.898 | 0.00 | 0.00 |
| ATOM | 4353 | CB   | VAL | 284 | 41.030 | 49.581 | 77.639 | 0.00 | 0.00 |
| ATOM | 4354 | HB   | VAL | 284 | 40.926 | 48.828 | 76.858 | 0.00 | 0.00 |
| ATOM | 4355 | CG1  | VAL | 284 | 39.694 | 49.714 | 78.431 | 0.00 | 0.00 |
| ATOM | 4356 | 1HG1 | VAL | 284 | 39.594 | 48.771 | 78.969 | 0.00 | 0.00 |
| ATOM | 4357 | 2HG1 | VAL | 284 | 39.708 | 50.408 | 79.271 | 0.00 | 0.00 |
| ATOM | 4358 | 3HG1 | VAL | 284 | 38.838 | 49.869 | 77.775 | 0.00 | 0.00 |
| ATOM | 4359 | CG2  | VAL | 284 | 41.244 | 50.937 | 76.853 | 0.00 | 0.00 |
| ATOM | 4360 | 1HG2 | VAL | 284 | 40.404 | 51.175 | 76.202 | 0.00 | 0.00 |
| ATOM | 4361 | 2HG2 | VAL | 284 | 41.368 | 51.743 | 77.576 | 0.00 | 0.00 |
| ATOM | 4362 | 3HG2 | VAL | 284 | 42.081 | 50.739 | 76.183 | 0.00 | 0.00 |
| ATOM | 4363 | C    | VAL | 284 | 43.461 | 49.062 | 77.643 | 0.00 | 0.00 |
| ATOM | 4364 | O    | VAL | 284 | 44.231 | 49.990 | 77.463 | 0.00 | 0.00 |
| ATOM | 4365 | N    | LYS | 285 | 43.455 | 47.917 | 76.932 | 0.00 | 0.00 |
| ATOM | 4366 | H    | LYS | 285 | 42.798 | 47.160 | 77.057 | 0.00 | 0.00 |
| ATOM | 4367 | CA   | LYS | 285 | 44.603 | 47.633 | 76.022 | 0.00 | 0.00 |

|      |      |     |     |     |        |        |        |      |      |
|------|------|-----|-----|-----|--------|--------|--------|------|------|
| ATOM | 4368 | HA  | LYS | 285 | 45.369 | 48.402 | 75.921 | 0.00 | 0.00 |
| ATOM | 4369 | CB  | LYS | 285 | 45.404 | 46.344 | 76.440 | 0.00 | 0.00 |
| ATOM | 4370 | HB2 | LYS | 285 | 45.392 | 46.337 | 77.530 | 0.00 | 0.00 |
| ATOM | 4371 | HB3 | LYS | 285 | 44.830 | 45.461 | 76.160 | 0.00 | 0.00 |
| ATOM | 4372 | CG  | LYS | 285 | 46.846 | 46.316 | 75.986 | 0.00 | 0.00 |
| ATOM | 4373 | HG2 | LYS | 285 | 46.940 | 46.355 | 74.901 | 0.00 | 0.00 |
| ATOM | 4374 | HG3 | LYS | 285 | 47.524 | 47.064 | 76.398 | 0.00 | 0.00 |
| ATOM | 4375 | CD  | LYS | 285 | 47.388 | 44.907 | 76.282 | 0.00 | 0.00 |
| ATOM | 4376 | HD2 | LYS | 285 | 48.340 | 44.854 | 75.755 | 0.00 | 0.00 |
| ATOM | 4377 | HD3 | LYS | 285 | 47.480 | 44.680 | 77.344 | 0.00 | 0.00 |
| ATOM | 4378 | CE  | LYS | 285 | 46.564 | 43.790 | 75.644 | 0.00 | 0.00 |
| ATOM | 4379 | HE2 | LYS | 285 | 45.577 | 43.693 | 76.097 | 0.00 | 0.00 |
| ATOM | 4380 | HE3 | LYS | 285 | 46.329 | 44.084 | 74.621 | 0.00 | 0.00 |
| ATOM | 4381 | NZ  | LYS | 285 | 47.035 | 42.394 | 75.769 | 0.00 | 0.00 |
| ATOM | 4382 | HZ1 | LYS | 285 | 47.124 | 42.164 | 76.748 | 0.00 | 0.00 |
| ATOM | 4383 | HZ2 | LYS | 285 | 46.311 | 41.868 | 75.301 | 0.00 | 0.00 |
| ATOM | 4384 | HZ3 | LYS | 285 | 47.952 | 42.303 | 75.357 | 0.00 | 0.00 |
| ATOM | 4385 | C   | LYS | 285 | 44.119 | 47.519 | 74.588 | 0.00 | 0.00 |
| ATOM | 4386 | O   | LYS | 285 | 42.986 | 47.211 | 74.313 | 0.00 | 0.00 |
| ATOM | 4387 | N   | ALA | 286 | 44.922 | 47.931 | 73.633 | 0.00 | 0.00 |
| ATOM | 4388 | H   | ALA | 286 | 45.831 | 48.301 | 73.871 | 0.00 | 0.00 |
| ATOM | 4389 | CA  | ALA | 286 | 44.494 | 48.170 | 72.257 | 0.00 | 0.00 |
| ATOM | 4390 | HA  | ALA | 286 | 44.065 | 47.281 | 71.793 | 0.00 | 0.00 |
| ATOM | 4391 | CB  | ALA | 286 | 43.515 | 49.450 | 72.219 | 0.00 | 0.00 |
| ATOM | 4392 | HB1 | ALA | 286 | 42.677 | 49.327 | 72.906 | 0.00 | 0.00 |
| ATOM | 4393 | HB2 | ALA | 286 | 44.037 | 50.337 | 72.577 | 0.00 | 0.00 |

|      |      |      |     |     |        |        |        |      |      |
|------|------|------|-----|-----|--------|--------|--------|------|------|
| ATOM | 4394 | HB3  | ALA | 286 | 43.113 | 49.522 | 71.208 | 0.00 | 0.00 |
| ATOM | 4395 | C    | ALA | 286 | 45.668 | 48.435 | 71.327 | 0.00 | 0.00 |
| ATOM | 4396 | O    | ALA | 286 | 46.805 | 48.670 | 71.779 | 0.00 | 0.00 |
| ATOM | 4397 | N    | ASP | 287 | 45.419 | 48.484 | 70.062 | 0.00 | 0.00 |
| ATOM | 4398 | H    | ASP | 287 | 44.579 | 48.101 | 69.653 | 0.00 | 0.00 |
| ATOM | 4399 | CA   | ASP | 287 | 46.244 | 49.145 | 69.016 | 0.00 | 0.00 |
| ATOM | 4400 | HA   | ASP | 287 | 47.266 | 49.107 | 69.390 | 0.00 | 0.00 |
| ATOM | 4401 | CB   | ASP | 287 | 46.361 | 48.349 | 67.690 | 0.00 | 0.00 |
| ATOM | 4402 | HB2  | ASP | 287 | 45.453 | 48.378 | 67.088 | 0.00 | 0.00 |
| ATOM | 4403 | HB3  | ASP | 287 | 47.159 | 48.819 | 67.115 | 0.00 | 0.00 |
| ATOM | 4404 | CG   | ASP | 287 | 46.768 | 46.890 | 67.921 | 0.00 | 0.00 |
| ATOM | 4405 | OD1  | ASP | 287 | 47.940 | 46.555 | 68.183 | 0.00 | 0.00 |
| ATOM | 4406 | OD2  | ASP | 287 | 45.819 | 46.093 | 67.752 | 0.00 | 0.00 |
| ATOM | 4407 | C    | ASP | 287 | 45.817 | 50.586 | 68.874 | 0.00 | 0.00 |
| ATOM | 4408 | O    | ASP | 287 | 44.587 | 50.820 | 69.025 | 0.00 | 0.00 |
| ATOM | 4409 | N    | ILE | 288 | 46.645 | 51.574 | 68.811 | 0.00 | 0.00 |
| ATOM | 4410 | H    | ILE | 288 | 47.609 | 51.311 | 68.660 | 0.00 | 0.00 |
| ATOM | 4411 | CA   | ILE | 288 | 46.319 | 52.988 | 68.685 | 0.00 | 0.00 |
| ATOM | 4412 | HA   | ILE | 288 | 45.231 | 53.054 | 68.670 | 0.00 | 0.00 |
| ATOM | 4413 | CB   | ILE | 288 | 46.821 | 53.842 | 69.794 | 0.00 | 0.00 |
| ATOM | 4414 | HB   | ILE | 288 | 47.900 | 53.829 | 69.642 | 0.00 | 0.00 |
| ATOM | 4415 | CG2  | ILE | 288 | 46.472 | 55.343 | 69.602 | 0.00 | 0.00 |
| ATOM | 4416 | 1HG2 | ILE | 288 | 45.392 | 55.481 | 69.649 | 0.00 | 0.00 |
| ATOM | 4417 | 2HG2 | ILE | 288 | 47.016 | 55.945 | 70.329 | 0.00 | 0.00 |
| ATOM | 4418 | 3HG2 | ILE | 288 | 46.783 | 55.757 | 68.642 | 0.00 | 0.00 |
| ATOM | 4419 | CG1  | ILE | 288 | 46.449 | 53.335 | 71.238 | 0.00 | 0.00 |

|      |      |      |     |     |        |        |        |      |      |
|------|------|------|-----|-----|--------|--------|--------|------|------|
| ATOM | 4420 | 2HG1 | ILE | 288 | 45.406 | 53.558 | 71.464 | 0.00 | 0.00 |
| ATOM | 4421 | 3HG1 | ILE | 288 | 46.535 | 52.260 | 71.393 | 0.00 | 0.00 |
| ATOM | 4422 | CD1  | ILE | 288 | 47.425 | 53.982 | 72.226 | 0.00 | 0.00 |
| ATOM | 4423 | 1HD1 | ILE | 288 | 48.438 | 53.726 | 71.918 | 0.00 | 0.00 |
| ATOM | 4424 | 2HD1 | ILE | 288 | 47.191 | 55.046 | 72.225 | 0.00 | 0.00 |
| ATOM | 4425 | 3HD1 | ILE | 288 | 47.249 | 53.592 | 73.229 | 0.00 | 0.00 |
| ATOM | 4426 | C    | ILE | 288 | 46.869 | 53.419 | 67.258 | 0.00 | 0.00 |
| ATOM | 4427 | O    | ILE | 288 | 48.039 | 53.298 | 66.991 | 0.00 | 0.00 |
| ATOM | 4428 | N    | GLY | 289 | 45.964 | 53.856 | 66.349 | 0.00 | 0.00 |
| ATOM | 4429 | H    | GLY | 289 | 45.009 | 53.974 | 66.657 | 0.00 | 0.00 |
| ATOM | 4430 | CA   | GLY | 289 | 46.377 | 54.469 | 65.025 | 0.00 | 0.00 |
| ATOM | 4431 | HA2  | GLY | 289 | 47.362 | 54.115 | 64.722 | 0.00 | 0.00 |
| ATOM | 4432 | HA3  | GLY | 289 | 45.553 | 54.291 | 64.333 | 0.00 | 0.00 |
| ATOM | 4433 | C    | GLY | 289 | 46.522 | 56.009 | 65.157 | 0.00 | 0.00 |
| ATOM | 4434 | O    | GLY | 289 | 45.860 | 56.675 | 65.962 | 0.00 | 0.00 |
| ATOM | 4435 | N    | VAL | 290 | 47.452 | 56.534 | 64.277 | 0.00 | 0.00 |
| ATOM | 4436 | H    | VAL | 290 | 47.904 | 55.911 | 63.623 | 0.00 | 0.00 |
| ATOM | 4437 | CA   | VAL | 290 | 47.916 | 57.939 | 64.204 | 0.00 | 0.00 |
| ATOM | 4438 | HA   | VAL | 290 | 47.234 | 58.702 | 64.580 | 0.00 | 0.00 |
| ATOM | 4439 | CB   | VAL | 290 | 49.276 | 58.265 | 64.854 | 0.00 | 0.00 |
| ATOM | 4440 | HB   | VAL | 290 | 50.049 | 57.659 | 64.381 | 0.00 | 0.00 |
| ATOM | 4441 | CG1  | VAL | 290 | 49.832 | 59.674 | 64.493 | 0.00 | 0.00 |
| ATOM | 4442 | 1HG1 | VAL | 290 | 49.051 | 60.416 | 64.660 | 0.00 | 0.00 |
| ATOM | 4443 | 2HG1 | VAL | 290 | 50.687 | 59.898 | 65.129 | 0.00 | 0.00 |
| ATOM | 4444 | 3HG1 | VAL | 290 | 50.302 | 59.623 | 63.510 | 0.00 | 0.00 |
| ATOM | 4445 | CG2  | VAL | 290 | 49.138 | 58.054 | 66.378 | 0.00 | 0.00 |

ATOM 4446 1HG2 VAL 290 49.033 56.991 66.594 0.00 0.00  
ATOM 4447 2HG2 VAL 290 49.981 58.461 66.936 0.00 0.00  
ATOM 4448 3HG2 VAL 290 48.290 58.626 66.755 0.00 0.00  
ATOM 4449 C VAL 290 48.085 58.324 62.771 0.00 0.00  
ATOM 4450 O VAL 290 48.865 57.684 62.070 0.00 0.00  
ATOM 4451 N LYS 291 47.309 59.303 62.300 0.00 0.00  
ATOM 4452 H LYS 291 46.870 59.904 62.983 0.00 0.00  
ATOM 4453 CA LYS 291 47.349 59.782 60.883 0.00 0.00  
ATOM 4454 HA LYS 291 48.353 59.617 60.493 0.00 0.00  
ATOM 4455 CB LYS 291 46.257 59.070 60.024 0.00 0.00  
ATOM 4456 HB2 LYS 291 46.233 58.014 60.289 0.00 0.00  
ATOM 4457 HB3 LYS 291 45.255 59.353 60.346 0.00 0.00  
ATOM 4458 CG LYS 291 46.324 59.355 58.523 0.00 0.00  
ATOM 4459 HG2 LYS 291 46.098 60.409 58.366 0.00 0.00  
ATOM 4460 HG3 LYS 291 47.277 58.993 58.135 0.00 0.00  
ATOM 4461 CD LYS 291 45.283 58.512 57.788 0.00 0.00  
ATOM 4462 HD2 LYS 291 45.339 57.474 58.116 0.00 0.00  
ATOM 4463 HD3 LYS 291 44.303 58.909 58.053 0.00 0.00  
ATOM 4464 CE LYS 291 45.505 58.687 56.292 0.00 0.00  
ATOM 4465 HE2 LYS 291 45.711 59.707 55.967 0.00 0.00  
ATOM 4466 HE3 LYS 291 46.342 58.028 56.058 0.00 0.00  
ATOM 4467 NZ LYS 291 44.386 58.165 55.515 0.00 0.00  
ATOM 4468 HZ1 LYS 291 43.516 58.678 55.542 0.00 0.00  
ATOM 4469 HZ2 LYS 291 44.714 58.134 54.561 0.00 0.00  
ATOM 4470 HZ3 LYS 291 44.174 57.221 55.805 0.00 0.00  
ATOM 4471 C LYS 291 47.235 61.290 60.779 0.00 0.00

|      |      |     |     |     |        |        |        |      |      |
|------|------|-----|-----|-----|--------|--------|--------|------|------|
| ATOM | 4472 | O   | LYS | 291 | 46.524 | 61.847 | 61.612 | 0.00 | 0.00 |
| ATOM | 4473 | N   | ASP | 292 | 47.887 | 61.879 | 59.758 | 0.00 | 0.00 |
| ATOM | 4474 | H   | ASP | 292 | 48.259 | 61.314 | 59.008 | 0.00 | 0.00 |
| ATOM | 4475 | CA  | ASP | 292 | 47.873 | 63.316 | 59.588 | 0.00 | 0.00 |
| ATOM | 4476 | HA  | ASP | 292 | 48.608 | 63.620 | 58.843 | 0.00 | 0.00 |
| ATOM | 4477 | CB  | ASP | 292 | 46.523 | 63.775 | 58.998 | 0.00 | 0.00 |
| ATOM | 4478 | HB2 | ASP | 292 | 46.250 | 63.229 | 58.095 | 0.00 | 0.00 |
| ATOM | 4479 | HB3 | ASP | 292 | 45.738 | 63.600 | 59.733 | 0.00 | 0.00 |
| ATOM | 4480 | CG  | ASP | 292 | 46.323 | 65.293 | 58.741 | 0.00 | 0.00 |
| ATOM | 4481 | OD1 | ASP | 292 | 47.176 | 65.853 | 58.037 | 0.00 | 0.00 |
| ATOM | 4482 | OD2 | ASP | 292 | 45.183 | 65.835 | 59.023 | 0.00 | 0.00 |
| ATOM | 4483 | C   | ASP | 292 | 48.402 | 63.943 | 60.880 | 0.00 | 0.00 |
| ATOM | 4484 | O   | ASP | 292 | 47.954 | 64.986 | 61.317 | 0.00 | 0.00 |
| ATOM | 4485 | N   | GLY | 293 | 49.339 | 63.315 | 61.587 | 0.00 | 0.00 |
| ATOM | 4486 | H   | GLY | 293 | 49.713 | 62.469 | 61.179 | 0.00 | 0.00 |
| ATOM | 4487 | CA  | GLY | 293 | 49.822 | 63.792 | 62.940 | 0.00 | 0.00 |
| ATOM | 4488 | HA2 | GLY | 293 | 50.734 | 63.279 | 63.245 | 0.00 | 0.00 |
| ATOM | 4489 | HA3 | GLY | 293 | 50.138 | 64.831 | 62.841 | 0.00 | 0.00 |
| ATOM | 4490 | C   | GLY | 293 | 48.886 | 63.730 | 64.193 | 0.00 | 0.00 |
| ATOM | 4491 | O   | GLY | 293 | 49.145 | 64.262 | 65.294 | 0.00 | 0.00 |
| ATOM | 4492 | N   | ARG | 294 | 47.694 | 63.116 | 63.918 | 0.00 | 0.00 |
| ATOM | 4493 | H   | ARG | 294 | 47.649 | 62.768 | 62.971 | 0.00 | 0.00 |
| ATOM | 4494 | CA  | ARG | 294 | 46.502 | 63.030 | 64.876 | 0.00 | 0.00 |
| ATOM | 4495 | HA  | ARG | 294 | 46.876 | 63.389 | 65.835 | 0.00 | 0.00 |
| ATOM | 4496 | CB  | ARG | 294 | 45.372 | 63.908 | 64.403 | 0.00 | 0.00 |
| ATOM | 4497 | HB2 | ARG | 294 | 45.073 | 63.601 | 63.401 | 0.00 | 0.00 |



|      |      |      |     |     |        |        |        |      |      |
|------|------|------|-----|-----|--------|--------|--------|------|------|
| ATOM | 4498 | HB3  | ARG | 294 | 44.502 | 63.676 | 65.019 | 0.00 | 0.00 |
| ATOM | 4499 | CG   | ARG | 294 | 45.812 | 65.359 | 64.446 | 0.00 | 0.00 |
| ATOM | 4500 | HG2  | ARG | 294 | 45.649 | 65.701 | 65.468 | 0.00 | 0.00 |
| ATOM | 4501 | HG3  | ARG | 294 | 46.839 | 65.555 | 64.138 | 0.00 | 0.00 |
| ATOM | 4502 | CD   | ARG | 294 | 44.917 | 66.324 | 63.603 | 0.00 | 0.00 |
| ATOM | 4503 | HD2  | ARG | 294 | 44.896 | 65.990 | 62.565 | 0.00 | 0.00 |
| ATOM | 4504 | HD3  | ARG | 294 | 43.925 | 66.231 | 64.044 | 0.00 | 0.00 |
| ATOM | 4505 | NE   | ARG | 294 | 45.432 | 67.679 | 63.668 | 0.00 | 0.00 |
| ATOM | 4506 | HE   | ARG | 294 | 46.240 | 67.897 | 63.102 | 0.00 | 0.00 |
| ATOM | 4507 | CZ   | ARG | 294 | 45.066 | 68.544 | 64.591 | 0.00 | 0.00 |
| ATOM | 4508 | NH1  | ARG | 294 | 45.598 | 69.716 | 64.713 | 0.00 | 0.00 |
| ATOM | 4509 | 1HH1 | ARG | 294 | 45.347 | 70.401 | 65.412 | 0.00 | 0.00 |
| ATOM | 4510 | 2HH1 | ARG | 294 | 46.442 | 69.926 | 64.200 | 0.00 | 0.00 |
| ATOM | 4511 | NH2  | ARG | 294 | 44.217 | 68.257 | 65.495 | 0.00 | 0.00 |
| ATOM | 4512 | 1HH2 | ARG | 294 | 43.910 | 69.032 | 66.065 | 0.00 | 0.00 |
| ATOM | 4513 | 2HH2 | ARG | 294 | 43.724 | 67.378 | 65.567 | 0.00 | 0.00 |
| ATOM | 4514 | C    | ARG | 294 | 46.073 | 61.616 | 65.347 | 0.00 | 0.00 |
| ATOM | 4515 | O    | ARG | 294 | 46.452 | 60.756 | 64.635 | 0.00 | 0.00 |
| ATOM | 4516 | N    | ILE | 295 | 45.384 | 61.407 | 66.413 | 0.00 | 0.00 |
| ATOM | 4517 | H    | ILE | 295 | 44.833 | 62.204 | 66.697 | 0.00 | 0.00 |
| ATOM | 4518 | CA   | ILE | 295 | 44.916 | 60.079 | 66.802 | 0.00 | 0.00 |
| ATOM | 4519 | HA   | ILE | 295 | 45.679 | 59.306 | 66.713 | 0.00 | 0.00 |
| ATOM | 4520 | CB   | ILE | 295 | 44.617 | 60.107 | 68.315 | 0.00 | 0.00 |
| ATOM | 4521 | HB   | ILE | 295 | 43.984 | 60.954 | 68.580 | 0.00 | 0.00 |
| ATOM | 4522 | CG2  | ILE | 295 | 43.939 | 58.769 | 68.774 | 0.00 | 0.00 |
| ATOM | 4523 | 1HG2 | ILE | 295 | 43.933 | 58.577 | 69.847 | 0.00 | 0.00 |

|      |      |      |     |     |        |        |        |      |      |
|------|------|------|-----|-----|--------|--------|--------|------|------|
| ATOM | 4524 | 2HG2 | ILE | 295 | 42.921 | 58.752 | 68.384 | 0.00 | 0.00 |
| ATOM | 4525 | 3HG2 | ILE | 295 | 44.453 | 57.871 | 68.430 | 0.00 | 0.00 |
| ATOM | 4526 | CG1  | ILE | 295 | 45.934 | 60.424 | 69.183 | 0.00 | 0.00 |
| ATOM | 4527 | 2HG1 | ILE | 295 | 46.493 | 61.191 | 68.648 | 0.00 | 0.00 |
| ATOM | 4528 | 3HG1 | ILE | 295 | 45.734 | 60.866 | 70.159 | 0.00 | 0.00 |
| ATOM | 4529 | CD1  | ILE | 295 | 46.968 | 59.226 | 69.474 | 0.00 | 0.00 |
| ATOM | 4530 | 1HD1 | ILE | 295 | 46.635 | 58.687 | 70.361 | 0.00 | 0.00 |
| ATOM | 4531 | 2HD1 | ILE | 295 | 46.999 | 58.631 | 68.561 | 0.00 | 0.00 |
| ATOM | 4532 | 3HD1 | ILE | 295 | 47.949 | 59.652 | 69.684 | 0.00 | 0.00 |
| ATOM | 4533 | C    | ILE | 295 | 43.767 | 59.548 | 65.974 | 0.00 | 0.00 |
| ATOM | 4534 | O    | ILE | 295 | 42.792 | 60.275 | 65.837 | 0.00 | 0.00 |
| ATOM | 4535 | N    | PHE | 296 | 43.870 | 58.386 | 65.377 | 0.00 | 0.00 |
| ATOM | 4536 | H    | PHE | 296 | 44.698 | 57.840 | 65.570 | 0.00 | 0.00 |
| ATOM | 4537 | CA   | PHE | 296 | 43.045 | 57.982 | 64.291 | 0.00 | 0.00 |
| ATOM | 4538 | HA   | PHE | 296 | 42.574 | 58.818 | 63.773 | 0.00 | 0.00 |
| ATOM | 4539 | CB   | PHE | 296 | 43.952 | 57.271 | 63.273 | 0.00 | 0.00 |
| ATOM | 4540 | HB2  | PHE | 296 | 44.682 | 58.073 | 63.164 | 0.00 | 0.00 |
| ATOM | 4541 | HB3  | PHE | 296 | 44.418 | 56.395 | 63.724 | 0.00 | 0.00 |
| ATOM | 4542 | CG   | PHE | 296 | 43.231 | 56.911 | 61.977 | 0.00 | 0.00 |
| ATOM | 4543 | CD1  | PHE | 296 | 43.017 | 57.840 | 60.900 | 0.00 | 0.00 |
| ATOM | 4544 | HD1  | PHE | 296 | 43.359 | 58.859 | 61.001 | 0.00 | 0.00 |
| ATOM | 4545 | CE1  | PHE | 296 | 42.453 | 57.302 | 59.727 | 0.00 | 0.00 |
| ATOM | 4546 | HE1  | PHE | 296 | 42.371 | 57.987 | 58.897 | 0.00 | 0.00 |
| ATOM | 4547 | CZ   | PHE | 296 | 41.971 | 55.974 | 59.652 | 0.00 | 0.00 |
| ATOM | 4548 | HZ   | PHE | 296 | 41.418 | 55.617 | 58.795 | 0.00 | 0.00 |
| ATOM | 4549 | CE2  | PHE | 296 | 42.042 | 55.082 | 60.752 | 0.00 | 0.00 |

|      |      |      |     |     |        |        |        |      |      |
|------|------|------|-----|-----|--------|--------|--------|------|------|
| ATOM | 4550 | HE2  | PHE | 296 | 41.594 | 54.100 | 60.805 | 0.00 | 0.00 |
| ATOM | 4551 | CD2  | PHE | 296 | 42.759 | 55.573 | 61.887 | 0.00 | 0.00 |
| ATOM | 4552 | HD2  | PHE | 296 | 42.929 | 54.959 | 62.759 | 0.00 | 0.00 |
| ATOM | 4553 | C    | PHE | 296 | 41.912 | 57.041 | 64.751 | 0.00 | 0.00 |
| ATOM | 4554 | O    | PHE | 296 | 40.756 | 57.030 | 64.256 | 0.00 | 0.00 |
| ATOM | 4555 | N    | ALA | 297 | 42.266 | 56.104 | 65.644 | 0.00 | 0.00 |
| ATOM | 4556 | H    | ALA | 297 | 43.199 | 56.071 | 66.028 | 0.00 | 0.00 |
| ATOM | 4557 | CA   | ALA | 297 | 41.265 | 55.128 | 66.259 | 0.00 | 0.00 |
| ATOM | 4558 | HA   | ALA | 297 | 40.524 | 55.729 | 66.785 | 0.00 | 0.00 |
| ATOM | 4559 | CB   | ALA | 297 | 40.661 | 54.115 | 65.265 | 0.00 | 0.00 |
| ATOM | 4560 | HB1  | ALA | 297 | 41.464 | 53.621 | 64.718 | 0.00 | 0.00 |
| ATOM | 4561 | HB2  | ALA | 297 | 40.089 | 53.306 | 65.718 | 0.00 | 0.00 |
| ATOM | 4562 | HB3  | ALA | 297 | 39.981 | 54.645 | 64.597 | 0.00 | 0.00 |
| ATOM | 4563 | C    | ALA | 297 | 41.882 | 54.279 | 67.447 | 0.00 | 0.00 |
| ATOM | 4564 | O    | ALA | 297 | 43.092 | 54.022 | 67.404 | 0.00 | 0.00 |
| ATOM | 4565 | N    | ILE | 298 | 41.052 | 53.815 | 68.414 | 0.00 | 0.00 |
| ATOM | 4566 | H    | ILE | 298 | 40.058 | 53.982 | 68.361 | 0.00 | 0.00 |
| ATOM | 4567 | CA   | ILE | 298 | 41.358 | 52.799 | 69.418 | 0.00 | 0.00 |
| ATOM | 4568 | HA   | ILE | 298 | 42.383 | 52.439 | 69.330 | 0.00 | 0.00 |
| ATOM | 4569 | CB   | ILE | 298 | 41.016 | 53.319 | 70.818 | 0.00 | 0.00 |
| ATOM | 4570 | HB   | ILE | 298 | 39.932 | 53.258 | 70.911 | 0.00 | 0.00 |
| ATOM | 4571 | CG2  | ILE | 298 | 41.747 | 52.420 | 71.913 | 0.00 | 0.00 |
| ATOM | 4572 | 1HG2 | ILE | 298 | 41.423 | 51.381 | 71.844 | 0.00 | 0.00 |
| ATOM | 4573 | 2HG2 | ILE | 298 | 42.831 | 52.369 | 71.815 | 0.00 | 0.00 |
| ATOM | 4574 | 3HG2 | ILE | 298 | 41.489 | 52.783 | 72.907 | 0.00 | 0.00 |
| ATOM | 4575 | CG1  | ILE | 298 | 41.460 | 54.815 | 71.042 | 0.00 | 0.00 |

|      |      |      |     |     |        |        |        |      |      |
|------|------|------|-----|-----|--------|--------|--------|------|------|
| ATOM | 4576 | 2HG1 | ILE | 298 | 41.010 | 55.427 | 70.260 | 0.00 | 0.00 |
| ATOM | 4577 | 3HG1 | ILE | 298 | 41.080 | 55.205 | 71.986 | 0.00 | 0.00 |
| ATOM | 4578 | CD1  | ILE | 298 | 42.990 | 54.946 | 71.061 | 0.00 | 0.00 |
| ATOM | 4579 | 1HD1 | ILE | 298 | 43.382 | 54.408 | 70.198 | 0.00 | 0.00 |
| ATOM | 4580 | 2HD1 | ILE | 298 | 43.277 | 55.965 | 70.805 | 0.00 | 0.00 |
| ATOM | 4581 | 3HD1 | ILE | 298 | 43.394 | 54.546 | 71.991 | 0.00 | 0.00 |
| ATOM | 4582 | C    | ILE | 298 | 40.591 | 51.501 | 69.181 | 0.00 | 0.00 |
| ATOM | 4583 | O    | ILE | 298 | 39.380 | 51.459 | 69.228 | 0.00 | 0.00 |
| ATOM | 4584 | N    | GLY | 299 | 41.387 | 50.462 | 68.737 | 0.00 | 0.00 |
| ATOM | 4585 | H    | GLY | 299 | 42.384 | 50.519 | 68.893 | 0.00 | 0.00 |
| ATOM | 4586 | CA   | GLY | 299 | 40.752 | 49.248 | 68.351 | 0.00 | 0.00 |
| ATOM | 4587 | HA2  | GLY | 299 | 40.129 | 48.900 | 69.174 | 0.00 | 0.00 |
| ATOM | 4588 | HA3  | GLY | 299 | 40.099 | 49.304 | 67.481 | 0.00 | 0.00 |
| ATOM | 4589 | C    | GLY | 299 | 41.655 | 48.088 | 68.031 | 0.00 | 0.00 |
| ATOM | 4590 | O    | GLY | 299 | 42.516 | 47.722 | 68.873 | 0.00 | 0.00 |
| ATOM | 4591 | N    | LYS | 300 | 41.493 | 47.571 | 66.797 | 0.00 | 0.00 |
| ATOM | 4592 | H    | LYS | 300 | 40.785 | 47.994 | 66.213 | 0.00 | 0.00 |
| ATOM | 4593 | CA   | LYS | 300 | 42.239 | 46.474 | 66.199 | 0.00 | 0.00 |
| ATOM | 4594 | HA   | LYS | 300 | 43.121 | 46.188 | 66.773 | 0.00 | 0.00 |
| ATOM | 4595 | CB   | LYS | 300 | 41.382 | 45.169 | 66.215 | 0.00 | 0.00 |
| ATOM | 4596 | HB2  | LYS | 300 | 41.040 | 44.943 | 67.225 | 0.00 | 0.00 |
| ATOM | 4597 | HB3  | LYS | 300 | 40.474 | 45.213 | 65.613 | 0.00 | 0.00 |
| ATOM | 4598 | CG   | LYS | 300 | 42.195 | 43.893 | 65.808 | 0.00 | 0.00 |
| ATOM | 4599 | HG2  | LYS | 300 | 43.202 | 44.056 | 66.194 | 0.00 | 0.00 |
| ATOM | 4600 | HG3  | LYS | 300 | 41.716 | 42.999 | 66.207 | 0.00 | 0.00 |
| ATOM | 4601 | CD   | LYS | 300 | 42.192 | 43.686 | 64.335 | 0.00 | 0.00 |

|      |      |     |     |     |        |        |        |      |      |
|------|------|-----|-----|-----|--------|--------|--------|------|------|
| ATOM | 4602 | HD2 | LYS | 300 | 41.197 | 43.463 | 63.951 | 0.00 | 0.00 |
| ATOM | 4603 | HD3 | LYS | 300 | 42.689 | 44.523 | 63.844 | 0.00 | 0.00 |
| ATOM | 4604 | CE  | LYS | 300 | 43.020 | 42.425 | 64.062 | 0.00 | 0.00 |
| ATOM | 4605 | HE2 | LYS | 300 | 42.444 | 41.569 | 64.411 | 0.00 | 0.00 |
| ATOM | 4606 | HE3 | LYS | 300 | 42.975 | 42.200 | 62.997 | 0.00 | 0.00 |
| ATOM | 4607 | NZ  | LYS | 300 | 44.526 | 42.491 | 64.393 | 0.00 | 0.00 |
| ATOM | 4608 | HZ1 | LYS | 300 | 45.058 | 41.703 | 64.049 | 0.00 | 0.00 |
| ATOM | 4609 | HZ2 | LYS | 300 | 44.884 | 43.321 | 63.943 | 0.00 | 0.00 |
| ATOM | 4610 | HZ3 | LYS | 300 | 44.661 | 42.598 | 65.388 | 0.00 | 0.00 |
| ATOM | 4611 | C   | LYS | 300 | 42.832 | 46.912 | 64.829 | 0.00 | 0.00 |
| ATOM | 4612 | O   | LYS | 300 | 42.159 | 47.621 | 64.151 | 0.00 | 0.00 |
| ATOM | 4613 | N   | ALA | 301 | 44.101 | 46.878 | 64.689 | 0.00 | 0.00 |
| ATOM | 4614 | H   | ALA | 301 | 44.574 | 46.383 | 65.432 | 0.00 | 0.00 |
| ATOM | 4615 | CA  | ALA | 301 | 44.870 | 47.209 | 63.468 | 0.00 | 0.00 |
| ATOM | 4616 | HA  | ALA | 301 | 44.323 | 47.949 | 62.883 | 0.00 | 0.00 |
| ATOM | 4617 | CB  | ALA | 301 | 46.257 | 47.686 | 63.850 | 0.00 | 0.00 |
| ATOM | 4618 | HB1 | ALA | 301 | 46.189 | 48.488 | 64.585 | 0.00 | 0.00 |
| ATOM | 4619 | HB2 | ALA | 301 | 46.842 | 46.843 | 64.217 | 0.00 | 0.00 |
| ATOM | 4620 | HB3 | ALA | 301 | 46.759 | 48.081 | 62.965 | 0.00 | 0.00 |
| ATOM | 4621 | C   | ALA | 301 | 45.135 | 45.985 | 62.533 | 0.00 | 0.00 |
| ATOM | 4622 | O   | ALA | 301 | 45.145 | 44.817 | 62.961 | 0.00 | 0.00 |
| ATOM | 4623 | N   | GLY | 302 | 45.463 | 46.281 | 61.245 | 0.00 | 0.00 |
| ATOM | 4624 | H   | GLY | 302 | 45.391 | 47.261 | 61.010 | 0.00 | 0.00 |
| ATOM | 4625 | CA  | GLY | 302 | 45.900 | 45.268 | 60.272 | 0.00 | 0.00 |
| ATOM | 4626 | HA2 | GLY | 302 | 46.978 | 45.186 | 60.411 | 0.00 | 0.00 |
| ATOM | 4627 | HA3 | GLY | 302 | 45.611 | 44.264 | 60.584 | 0.00 | 0.00 |

|      |      |      |     |     |        |        |        |      |      |
|------|------|------|-----|-----|--------|--------|--------|------|------|
| ATOM | 4628 | C    | GLY | 302 | 45.537 | 45.497 | 58.813 | 0.00 | 0.00 |
| ATOM | 4629 | O    | GLY | 302 | 45.040 | 46.591 | 58.391 | 0.00 | 0.00 |
| ATOM | 4630 | N    | ASN | 303 | 45.879 | 44.523 | 58.008 | 0.00 | 0.00 |
| ATOM | 4631 | H    | ASN | 303 | 46.066 | 43.687 | 58.543 | 0.00 | 0.00 |
| ATOM | 4632 | CA   | ASN | 303 | 45.768 | 44.420 | 56.541 | 0.00 | 0.00 |
| ATOM | 4633 | HA   | ASN | 303 | 46.190 | 45.290 | 56.037 | 0.00 | 0.00 |
| ATOM | 4634 | CB   | ASN | 303 | 46.545 | 43.314 | 55.877 | 0.00 | 0.00 |
| ATOM | 4635 | HB2  | ASN | 303 | 47.593 | 43.581 | 56.014 | 0.00 | 0.00 |
| ATOM | 4636 | HB3  | ASN | 303 | 46.335 | 42.371 | 56.381 | 0.00 | 0.00 |
| ATOM | 4637 | CG   | ASN | 303 | 46.375 | 43.170 | 54.389 | 0.00 | 0.00 |
| ATOM | 4638 | OD1  | ASN | 303 | 45.669 | 43.975 | 53.794 | 0.00 | 0.00 |
| ATOM | 4639 | ND2  | ASN | 303 | 46.612 | 41.947 | 53.917 | 0.00 | 0.00 |
| ATOM | 4640 | 1HD2 | ASN | 303 | 46.605 | 41.701 | 52.937 | 0.00 | 0.00 |
| ATOM | 4641 | 2HD2 | ASN | 303 | 47.272 | 41.475 | 54.518 | 0.00 | 0.00 |
| ATOM | 4642 | C    | ASN | 303 | 44.248 | 44.095 | 56.251 | 0.00 | 0.00 |
| ATOM | 4643 | O    | ASN | 303 | 43.777 | 42.997 | 56.526 | 0.00 | 0.00 |
| ATOM | 4644 | N    | PRO | 304 | 43.372 | 45.060 | 55.758 | 0.00 | 0.00 |
| ATOM | 4645 | CD   | PRO | 304 | 43.835 | 46.364 | 55.197 | 0.00 | 0.00 |
| ATOM | 4646 | HD2  | PRO | 304 | 44.359 | 46.199 | 54.256 | 0.00 | 0.00 |
| ATOM | 4647 | HD3  | PRO | 304 | 44.437 | 46.852 | 55.964 | 0.00 | 0.00 |
| ATOM | 4648 | CG   | PRO | 304 | 42.563 | 47.162 | 54.924 | 0.00 | 0.00 |
| ATOM | 4649 | HG2  | PRO | 304 | 42.747 | 48.117 | 55.417 | 0.00 | 0.00 |
| ATOM | 4650 | HG3  | PRO | 304 | 42.382 | 47.027 | 53.858 | 0.00 | 0.00 |
| ATOM | 4651 | CB   | PRO | 304 | 41.544 | 46.456 | 55.865 | 0.00 | 0.00 |
| ATOM | 4652 | HB2  | PRO | 304 | 41.578 | 46.928 | 56.847 | 0.00 | 0.00 |
| ATOM | 4653 | HB3  | PRO | 304 | 40.509 | 46.625 | 55.570 | 0.00 | 0.00 |

|      |      |      |     |     |        |        |        |      |      |
|------|------|------|-----|-----|--------|--------|--------|------|------|
| ATOM | 4654 | CA   | PRO | 304 | 41.993 | 45.011 | 55.898 | 0.00 | 0.00 |
| ATOM | 4655 | HA   | PRO | 304 | 41.724 | 44.492 | 56.818 | 0.00 | 0.00 |
| ATOM | 4656 | C    | PRO | 304 | 41.265 | 44.149 | 54.729 | 0.00 | 0.00 |
| ATOM | 4657 | O    | PRO | 304 | 40.054 | 43.953 | 54.642 | 0.00 | 0.00 |
| ATOM | 4658 | N    | ASP | 305 | 42.115 | 43.538 | 53.826 | 0.00 | 0.00 |
| ATOM | 4659 | H    | ASP | 305 | 43.038 | 43.937 | 53.725 | 0.00 | 0.00 |
| ATOM | 4660 | CA   | ASP | 305 | 41.664 | 42.646 | 52.751 | 0.00 | 0.00 |
| ATOM | 4661 | HA   | ASP | 305 | 40.584 | 42.756 | 52.662 | 0.00 | 0.00 |
| ATOM | 4662 | CB   | ASP | 305 | 42.357 | 42.926 | 51.413 | 0.00 | 0.00 |
| ATOM | 4663 | HB2  | ASP | 305 | 43.394 | 42.661 | 51.621 | 0.00 | 0.00 |
| ATOM | 4664 | HB3  | ASP | 305 | 41.942 | 42.262 | 50.654 | 0.00 | 0.00 |
| ATOM | 4665 | CG   | ASP | 305 | 42.136 | 44.416 | 51.095 | 0.00 | 0.00 |
| ATOM | 4666 | OD1  | ASP | 305 | 42.882 | 45.323 | 51.523 | 0.00 | 0.00 |
| ATOM | 4667 | OD2  | ASP | 305 | 41.184 | 44.699 | 50.355 | 0.00 | 0.00 |
| ATOM | 4668 | C    | ASP | 305 | 41.885 | 41.182 | 53.069 | 0.00 | 0.00 |
| ATOM | 4669 | O    | ASP | 305 | 41.293 | 40.378 | 52.428 | 0.00 | 0.00 |
| ATOM | 4670 | N    | ILE | 306 | 42.601 | 40.844 | 54.158 | 0.00 | 0.00 |
| ATOM | 4671 | H    | ILE | 306 | 43.226 | 41.519 | 54.575 | 0.00 | 0.00 |
| ATOM | 4672 | CA   | ILE | 306 | 42.646 | 39.504 | 54.721 | 0.00 | 0.00 |
| ATOM | 4673 | HA   | ILE | 306 | 41.794 | 38.981 | 54.285 | 0.00 | 0.00 |
| ATOM | 4674 | CB   | ILE | 306 | 43.908 | 38.686 | 54.321 | 0.00 | 0.00 |
| ATOM | 4675 | HB   | ILE | 306 | 43.789 | 37.669 | 54.696 | 0.00 | 0.00 |
| ATOM | 4676 | CG2  | ILE | 306 | 44.020 | 38.519 | 52.772 | 0.00 | 0.00 |
| ATOM | 4677 | 1HG2 | ILE | 306 | 44.413 | 39.399 | 52.262 | 0.00 | 0.00 |
| ATOM | 4678 | 2HG2 | ILE | 306 | 44.631 | 37.653 | 52.519 | 0.00 | 0.00 |
| ATOM | 4679 | 3HG2 | ILE | 306 | 43.047 | 38.397 | 52.297 | 0.00 | 0.00 |

|      |      |      |     |     |        |        |        |      |      |
|------|------|------|-----|-----|--------|--------|--------|------|------|
| ATOM | 4680 | CG1  | ILE | 306 | 45.322 | 39.163 | 54.874 | 0.00 | 0.00 |
| ATOM | 4681 | 2HG1 | ILE | 306 | 46.057 | 39.247 | 54.073 | 0.00 | 0.00 |
| ATOM | 4682 | 3HG1 | ILE | 306 | 45.215 | 40.209 | 55.164 | 0.00 | 0.00 |
| ATOM | 4683 | CD1  | ILE | 306 | 45.901 | 38.348 | 55.968 | 0.00 | 0.00 |
| ATOM | 4684 | 1HD1 | ILE | 306 | 46.120 | 37.345 | 55.601 | 0.00 | 0.00 |
| ATOM | 4685 | 2HD1 | ILE | 306 | 46.819 | 38.823 | 56.314 | 0.00 | 0.00 |
| ATOM | 4686 | 3HD1 | ILE | 306 | 45.175 | 38.340 | 56.781 | 0.00 | 0.00 |
| ATOM | 4687 | C    | ILE | 306 | 42.425 | 39.349 | 56.202 | 0.00 | 0.00 |
| ATOM | 4688 | O    | ILE | 306 | 42.480 | 38.228 | 56.729 | 0.00 | 0.00 |
| ATOM | 4689 | N    | GLN | 307 | 42.291 | 40.450 | 56.973 | 0.00 | 0.00 |
| ATOM | 4690 | H    | GLN | 307 | 42.307 | 41.368 | 56.551 | 0.00 | 0.00 |
| ATOM | 4691 | CA   | GLN | 307 | 41.988 | 40.348 | 58.455 | 0.00 | 0.00 |
| ATOM | 4692 | HA   | GLN | 307 | 41.918 | 39.326 | 58.825 | 0.00 | 0.00 |
| ATOM | 4693 | CB   | GLN | 307 | 43.080 | 41.084 | 59.242 | 0.00 | 0.00 |
| ATOM | 4694 | HB2  | GLN | 307 | 43.092 | 42.129 | 58.931 | 0.00 | 0.00 |
| ATOM | 4695 | HB3  | GLN | 307 | 42.884 | 41.065 | 60.314 | 0.00 | 0.00 |
| ATOM | 4696 | CG   | GLN | 307 | 44.438 | 40.416 | 58.915 | 0.00 | 0.00 |
| ATOM | 4697 | HG2  | GLN | 307 | 44.350 | 39.343 | 59.083 | 0.00 | 0.00 |
| ATOM | 4698 | HG3  | GLN | 307 | 44.698 | 40.564 | 57.867 | 0.00 | 0.00 |
| ATOM | 4699 | CD   | GLN | 307 | 45.642 | 41.022 | 59.653 | 0.00 | 0.00 |
| ATOM | 4700 | OE1  | GLN | 307 | 46.172 | 42.083 | 59.392 | 0.00 | 0.00 |
| ATOM | 4701 | NE2  | GLN | 307 | 46.091 | 40.382 | 60.676 | 0.00 | 0.00 |
| ATOM | 4702 | 1HE2 | GLN | 307 | 46.870 | 40.802 | 61.162 | 0.00 | 0.00 |
| ATOM | 4703 | 2HE2 | GLN | 307 | 45.634 | 39.525 | 60.952 | 0.00 | 0.00 |
| ATOM | 4704 | C    | GLN | 307 | 40.534 | 40.846 | 58.848 | 0.00 | 0.00 |
| ATOM | 4705 | O    | GLN | 307 | 39.995 | 41.788 | 58.209 | 0.00 | 0.00 |



|      |      |      |     |     |        |        |        |      |      |
|------|------|------|-----|-----|--------|--------|--------|------|------|
| ATOM | 4706 | N    | PRO | 308 | 39.941 | 40.292 | 59.941 | 0.00 | 0.00 |
| ATOM | 4707 | CD   | PRO | 308 | 40.567 | 39.279 | 60.826 | 0.00 | 0.00 |
| ATOM | 4708 | HD2  | PRO | 308 | 40.652 | 38.347 | 60.266 | 0.00 | 0.00 |
| ATOM | 4709 | HD3  | PRO | 308 | 41.483 | 39.562 | 61.346 | 0.00 | 0.00 |
| ATOM | 4710 | CG   | PRO | 308 | 39.522 | 38.998 | 61.918 | 0.00 | 0.00 |
| ATOM | 4711 | HG2  | PRO | 308 | 39.358 | 37.929 | 62.055 | 0.00 | 0.00 |
| ATOM | 4712 | HG3  | PRO | 308 | 39.919 | 39.367 | 62.863 | 0.00 | 0.00 |
| ATOM | 4713 | CB   | PRO | 308 | 38.216 | 39.640 | 61.441 | 0.00 | 0.00 |
| ATOM | 4714 | HB2  | PRO | 308 | 37.527 | 38.941 | 60.968 | 0.00 | 0.00 |
| ATOM | 4715 | HB3  | PRO | 308 | 37.648 | 40.095 | 62.253 | 0.00 | 0.00 |
| ATOM | 4716 | CA   | PRO | 308 | 38.655 | 40.778 | 60.464 | 0.00 | 0.00 |
| ATOM | 4717 | HA   | PRO | 308 | 37.872 | 40.684 | 59.712 | 0.00 | 0.00 |
| ATOM | 4718 | C    | PRO | 308 | 38.743 | 42.046 | 61.372 | 0.00 | 0.00 |
| ATOM | 4719 | O    | PRO | 308 | 39.789 | 42.290 | 61.965 | 0.00 | 0.00 |
| ATOM | 4720 | N    | ASN | 309 | 37.589 | 42.745 | 61.507 | 0.00 | 0.00 |
| ATOM | 4721 | H    | ASN | 309 | 36.885 | 42.447 | 60.848 | 0.00 | 0.00 |
| ATOM | 4722 | CA   | ASN | 309 | 37.372 | 43.736 | 62.560 | 0.00 | 0.00 |
| ATOM | 4723 | HA   | ASN | 309 | 36.425 | 44.240 | 62.365 | 0.00 | 0.00 |
| ATOM | 4724 | CB   | ASN | 309 | 37.241 | 43.001 | 63.916 | 0.00 | 0.00 |
| ATOM | 4725 | HB2  | ASN | 309 | 36.474 | 42.230 | 63.845 | 0.00 | 0.00 |
| ATOM | 4726 | HB3  | ASN | 309 | 38.223 | 42.557 | 64.081 | 0.00 | 0.00 |
| ATOM | 4727 | CG   | ASN | 309 | 37.009 | 43.828 | 65.124 | 0.00 | 0.00 |
| ATOM | 4728 | OD1  | ASN | 309 | 36.255 | 44.792 | 65.207 | 0.00 | 0.00 |
| ATOM | 4729 | ND2  | ASN | 309 | 37.552 | 43.501 | 66.202 | 0.00 | 0.00 |
| ATOM | 4730 | 1HD2 | ASN | 309 | 37.656 | 44.208 | 66.916 | 0.00 | 0.00 |
| ATOM | 4731 | 2HD2 | ASN | 309 | 37.993 | 42.614 | 66.399 | 0.00 | 0.00 |

|      |      |      |     |     |        |        |        |      |      |
|------|------|------|-----|-----|--------|--------|--------|------|------|
| ATOM | 4732 | C    | ASN | 309 | 38.432 | 44.926 | 62.537 | 0.00 | 0.00 |
| ATOM | 4733 | O    | ASN | 309 | 38.682 | 45.519 | 63.629 | 0.00 | 0.00 |
| ATOM | 4734 | N    | VAL | 310 | 39.020 | 45.296 | 61.372 | 0.00 | 0.00 |
| ATOM | 4735 | H    | VAL | 310 | 38.692 | 44.821 | 60.543 | 0.00 | 0.00 |
| ATOM | 4736 | CA   | VAL | 310 | 40.064 | 46.307 | 61.420 | 0.00 | 0.00 |
| ATOM | 4737 | HA   | VAL | 310 | 40.608 | 46.151 | 62.351 | 0.00 | 0.00 |
| ATOM | 4738 | CB   | VAL | 310 | 41.124 | 46.113 | 60.342 | 0.00 | 0.00 |
| ATOM | 4739 | HB   | VAL | 310 | 40.608 | 46.104 | 59.382 | 0.00 | 0.00 |
| ATOM | 4740 | CG1  | VAL | 310 | 42.129 | 47.249 | 60.367 | 0.00 | 0.00 |
| ATOM | 4741 | 1HG1 | VAL | 310 | 42.962 | 46.941 | 59.735 | 0.00 | 0.00 |
| ATOM | 4742 | 2HG1 | VAL | 310 | 41.641 | 48.086 | 59.869 | 0.00 | 0.00 |
| ATOM | 4743 | 3HG1 | VAL | 310 | 42.457 | 47.406 | 61.395 | 0.00 | 0.00 |
| ATOM | 4744 | CG2  | VAL | 310 | 41.807 | 44.749 | 60.561 | 0.00 | 0.00 |
| ATOM | 4745 | 1HG2 | VAL | 310 | 41.117 | 43.905 | 60.521 | 0.00 | 0.00 |
| ATOM | 4746 | 2HG2 | VAL | 310 | 42.630 | 44.554 | 59.873 | 0.00 | 0.00 |
| ATOM | 4747 | 3HG2 | VAL | 310 | 42.295 | 44.741 | 61.535 | 0.00 | 0.00 |
| ATOM | 4748 | C    | VAL | 310 | 39.435 | 47.722 | 61.467 | 0.00 | 0.00 |
| ATOM | 4749 | O    | VAL | 310 | 38.789 | 48.158 | 60.570 | 0.00 | 0.00 |
| ATOM | 4750 | N    | THR | 311 | 39.826 | 48.472 | 62.497 | 0.00 | 0.00 |
| ATOM | 4751 | H    | THR | 311 | 40.377 | 48.054 | 63.234 | 0.00 | 0.00 |
| ATOM | 4752 | CA   | THR | 311 | 39.669 | 49.929 | 62.539 | 0.00 | 0.00 |
| ATOM | 4753 | HA   | THR | 311 | 38.940 | 50.125 | 61.753 | 0.00 | 0.00 |
| ATOM | 4754 | CB   | THR | 311 | 39.091 | 50.373 | 63.872 | 0.00 | 0.00 |
| ATOM | 4755 | HB   | THR | 311 | 39.210 | 51.455 | 63.929 | 0.00 | 0.00 |
| ATOM | 4756 | CG2  | THR | 311 | 37.655 | 50.003 | 64.027 | 0.00 | 0.00 |
| ATOM | 4757 | 1HG2 | THR | 311 | 37.255 | 50.204 | 63.033 | 0.00 | 0.00 |

|      |      |      |     |     |        |        |        |      |      |
|------|------|------|-----|-----|--------|--------|--------|------|------|
| ATOM | 4758 | 2HG2 | THR | 311 | 37.450 | 48.935 | 64.095 | 0.00 | 0.00 |
| ATOM | 4759 | 3HG2 | THR | 311 | 37.122 | 50.510 | 64.831 | 0.00 | 0.00 |
| ATOM | 4760 | OG1  | THR | 311 | 39.753 | 49.780 | 64.949 | 0.00 | 0.00 |
| ATOM | 4761 | HG1  | THR | 311 | 39.222 | 49.055 | 65.286 | 0.00 | 0.00 |
| ATOM | 4762 | C    | THR | 311 | 40.916 | 50.731 | 62.277 | 0.00 | 0.00 |
| ATOM | 4763 | O    | THR | 311 | 40.843 | 51.893 | 61.928 | 0.00 | 0.00 |
| ATOM | 4764 | N    | ILE | 312 | 42.137 | 50.176 | 62.411 | 0.00 | 0.00 |
| ATOM | 4765 | H    | ILE | 312 | 42.180 | 49.242 | 62.793 | 0.00 | 0.00 |
| ATOM | 4766 | CA   | ILE | 312 | 43.388 | 50.830 | 62.053 | 0.00 | 0.00 |
| ATOM | 4767 | HA   | ILE | 312 | 43.141 | 51.873 | 61.852 | 0.00 | 0.00 |
| ATOM | 4768 | CB   | ILE | 312 | 44.393 | 50.832 | 63.254 | 0.00 | 0.00 |
| ATOM | 4769 | HB   | ILE | 312 | 44.690 | 49.818 | 63.523 | 0.00 | 0.00 |
| ATOM | 4770 | CG2  | ILE | 312 | 45.588 | 51.647 | 62.816 | 0.00 | 0.00 |
| ATOM | 4771 | 1HG2 | ILE | 312 | 45.351 | 52.674 | 62.538 | 0.00 | 0.00 |
| ATOM | 4772 | 2HG2 | ILE | 312 | 46.234 | 51.686 | 63.693 | 0.00 | 0.00 |
| ATOM | 4773 | 3HG2 | ILE | 312 | 46.191 | 51.207 | 62.022 | 0.00 | 0.00 |
| ATOM | 4774 | CG1  | ILE | 312 | 43.829 | 51.453 | 64.482 | 0.00 | 0.00 |
| ATOM | 4775 | 2HG1 | ILE | 312 | 44.443 | 52.232 | 64.933 | 0.00 | 0.00 |
| ATOM | 4776 | 3HG1 | ILE | 312 | 43.006 | 52.066 | 64.114 | 0.00 | 0.00 |
| ATOM | 4777 | CD1  | ILE | 312 | 43.411 | 50.453 | 65.552 | 0.00 | 0.00 |
| ATOM | 4778 | 1HD1 | ILE | 312 | 42.583 | 49.826 | 65.221 | 0.00 | 0.00 |
| ATOM | 4779 | 2HD1 | ILE | 312 | 44.286 | 49.805 | 65.603 | 0.00 | 0.00 |
| ATOM | 4780 | 3HD1 | ILE | 312 | 43.183 | 50.932 | 66.504 | 0.00 | 0.00 |
| ATOM | 4781 | C    | ILE | 312 | 44.063 | 50.214 | 60.782 | 0.00 | 0.00 |
| ATOM | 4782 | O    | ILE | 312 | 44.698 | 49.183 | 60.891 | 0.00 | 0.00 |
| ATOM | 4783 | N    | PRO | 313 | 43.970 | 50.830 | 59.598 | 0.00 | 0.00 |

|      |      |      |     |     |        |        |        |      |      |
|------|------|------|-----|-----|--------|--------|--------|------|------|
| ATOM | 4784 | CD   | PRO | 313 | 42.959 | 51.879 | 59.322 | 0.00 | 0.00 |
| ATOM | 4785 | HD2  | PRO | 313 | 42.031 | 51.340 | 59.516 | 0.00 | 0.00 |
| ATOM | 4786 | HD3  | PRO | 313 | 43.083 | 52.739 | 59.980 | 0.00 | 0.00 |
| ATOM | 4787 | CG   | PRO | 313 | 43.028 | 52.229 | 57.820 | 0.00 | 0.00 |
| ATOM | 4788 | HG2  | PRO | 313 | 42.043 | 52.468 | 57.419 | 0.00 | 0.00 |
| ATOM | 4789 | HG3  | PRO | 313 | 43.725 | 53.065 | 57.770 | 0.00 | 0.00 |
| ATOM | 4790 | CB   | PRO | 313 | 43.588 | 50.987 | 57.159 | 0.00 | 0.00 |
| ATOM | 4791 | HB2  | PRO | 313 | 42.753 | 50.350 | 56.870 | 0.00 | 0.00 |
| ATOM | 4792 | HB3  | PRO | 313 | 44.189 | 51.294 | 56.302 | 0.00 | 0.00 |
| ATOM | 4793 | CA   | PRO | 313 | 44.396 | 50.292 | 58.256 | 0.00 | 0.00 |
| ATOM | 4794 | HA   | PRO | 313 | 44.173 | 49.231 | 58.138 | 0.00 | 0.00 |
| ATOM | 4795 | C    | PRO | 313 | 45.884 | 50.506 | 58.092 | 0.00 | 0.00 |
| ATOM | 4796 | O    | PRO | 313 | 46.330 | 51.632 | 57.932 | 0.00 | 0.00 |
| ATOM | 4797 | N    | ILE | 314 | 46.626 | 49.397 | 58.150 | 0.00 | 0.00 |
| ATOM | 4798 | H    | ILE | 314 | 46.173 | 48.516 | 58.347 | 0.00 | 0.00 |
| ATOM | 4799 | CA   | ILE | 314 | 48.108 | 49.440 | 58.099 | 0.00 | 0.00 |
| ATOM | 4800 | HA   | ILE | 314 | 48.662 | 50.308 | 58.456 | 0.00 | 0.00 |
| ATOM | 4801 | CB   | ILE | 314 | 48.591 | 48.266 | 59.025 | 0.00 | 0.00 |
| ATOM | 4802 | HB   | ILE | 314 | 48.224 | 47.342 | 58.579 | 0.00 | 0.00 |
| ATOM | 4803 | CG2  | ILE | 314 | 50.147 | 48.186 | 58.950 | 0.00 | 0.00 |
| ATOM | 4804 | 1HG2 | ILE | 314 | 50.549 | 47.441 | 59.636 | 0.00 | 0.00 |
| ATOM | 4805 | 2HG2 | ILE | 314 | 50.536 | 47.920 | 57.966 | 0.00 | 0.00 |
| ATOM | 4806 | 3HG2 | ILE | 314 | 50.637 | 49.113 | 59.244 | 0.00 | 0.00 |
| ATOM | 4807 | CG1  | ILE | 314 | 48.063 | 48.276 | 60.464 | 0.00 | 0.00 |
| ATOM | 4808 | 2HG1 | ILE | 314 | 46.979 | 48.277 | 60.579 | 0.00 | 0.00 |
| ATOM | 4809 | 3HG1 | ILE | 314 | 48.512 | 47.389 | 60.910 | 0.00 | 0.00 |

|      |      |      |     |     |        |        |        |      |      |
|------|------|------|-----|-----|--------|--------|--------|------|------|
| ATOM | 4810 | CD1  | ILE | 314 | 48.524 | 49.584 | 61.216 | 0.00 | 0.00 |
| ATOM | 4811 | 1HD1 | ILE | 314 | 48.150 | 50.508 | 60.775 | 0.00 | 0.00 |
| ATOM | 4812 | 2HD1 | ILE | 314 | 48.165 | 49.435 | 62.234 | 0.00 | 0.00 |
| ATOM | 4813 | 3HD1 | ILE | 314 | 49.599 | 49.697 | 61.359 | 0.00 | 0.00 |
| ATOM | 4814 | C    | ILE | 314 | 48.533 | 49.159 | 56.706 | 0.00 | 0.00 |
| ATOM | 4815 | O    | ILE | 314 | 48.051 | 48.184 | 56.201 | 0.00 | 0.00 |
| ATOM | 4816 | N    | GLY | 315 | 49.392 | 49.979 | 56.043 | 0.00 | 0.00 |
| ATOM | 4817 | H    | GLY | 315 | 49.924 | 50.523 | 56.706 | 0.00 | 0.00 |
| ATOM | 4818 | CA   | GLY | 315 | 49.824 | 49.927 | 54.626 | 0.00 | 0.00 |
| ATOM | 4819 | HA2  | GLY | 315 | 49.030 | 50.352 | 54.012 | 0.00 | 0.00 |
| ATOM | 4820 | HA3  | GLY | 315 | 49.944 | 48.876 | 54.366 | 0.00 | 0.00 |
| ATOM | 4821 | C    | GLY | 315 | 51.194 | 50.514 | 54.460 | 0.00 | 0.00 |
| ATOM | 4822 | O    | GLY | 315 | 52.010 | 50.483 | 55.360 | 0.00 | 0.00 |
| ATOM | 4823 | N    | ALA | 316 | 51.416 | 50.993 | 53.239 | 0.00 | 0.00 |
| ATOM | 4824 | H    | ALA | 316 | 50.735 | 51.052 | 52.496 | 0.00 | 0.00 |
| ATOM | 4825 | CA   | ALA | 316 | 52.714 | 51.563 | 52.810 | 0.00 | 0.00 |
| ATOM | 4826 | HA   | ALA | 316 | 53.451 | 50.792 | 53.034 | 0.00 | 0.00 |
| ATOM | 4827 | CB   | ALA | 316 | 52.549 | 51.983 | 51.358 | 0.00 | 0.00 |
| ATOM | 4828 | HB1  | ALA | 316 | 53.499 | 52.177 | 50.860 | 0.00 | 0.00 |
| ATOM | 4829 | HB2  | ALA | 316 | 52.015 | 51.188 | 50.839 | 0.00 | 0.00 |
| ATOM | 4830 | HB3  | ALA | 316 | 51.880 | 52.843 | 51.393 | 0.00 | 0.00 |
| ATOM | 4831 | C    | ALA | 316 | 53.128 | 52.793 | 53.644 | 0.00 | 0.00 |
| ATOM | 4832 | O    | ALA | 316 | 54.338 | 52.991 | 53.856 | 0.00 | 0.00 |
| ATOM | 4833 | N    | ALA | 317 | 52.159 | 53.514 | 54.200 | 0.00 | 0.00 |
| ATOM | 4834 | H    | ALA | 317 | 51.206 | 53.266 | 53.977 | 0.00 | 0.00 |
| ATOM | 4835 | CA   | ALA | 317 | 52.406 | 54.794 | 55.030 | 0.00 | 0.00 |

|      |      |      |     |     |        |        |        |      |      |
|------|------|------|-----|-----|--------|--------|--------|------|------|
| ATOM | 4836 | HA   | ALA | 317 | 53.070 | 55.450 | 54.467 | 0.00 | 0.00 |
| ATOM | 4837 | CB   | ALA | 317 | 50.974 | 55.387 | 55.094 | 0.00 | 0.00 |
| ATOM | 4838 | HB1  | ALA | 317 | 51.060 | 56.420 | 55.432 | 0.00 | 0.00 |
| ATOM | 4839 | HB2  | ALA | 317 | 50.386 | 55.407 | 54.177 | 0.00 | 0.00 |
| ATOM | 4840 | HB3  | ALA | 317 | 50.417 | 54.744 | 55.775 | 0.00 | 0.00 |
| ATOM | 4841 | C    | ALA | 317 | 53.017 | 54.482 | 56.399 | 0.00 | 0.00 |
| ATOM | 4842 | O    | ALA | 317 | 53.614 | 55.423 | 56.989 | 0.00 | 0.00 |
| ATOM | 4843 | N    | THR | 318 | 52.962 | 53.255 | 56.898 | 0.00 | 0.00 |
| ATOM | 4844 | H    | THR | 318 | 52.620 | 52.491 | 56.334 | 0.00 | 0.00 |
| ATOM | 4845 | CA   | THR | 318 | 53.052 | 52.997 | 58.341 | 0.00 | 0.00 |
| ATOM | 4846 | HA   | THR | 318 | 52.751 | 53.915 | 58.847 | 0.00 | 0.00 |
| ATOM | 4847 | CB   | THR | 318 | 52.010 | 51.945 | 58.876 | 0.00 | 0.00 |
| ATOM | 4848 | HB   | THR | 318 | 52.422 | 50.966 | 58.630 | 0.00 | 0.00 |
| ATOM | 4849 | CG2  | THR | 318 | 51.840 | 51.946 | 60.369 | 0.00 | 0.00 |
| ATOM | 4850 | 1HG2 | THR | 318 | 52.564 | 51.211 | 60.721 | 0.00 | 0.00 |
| ATOM | 4851 | 2HG2 | THR | 318 | 51.959 | 52.930 | 60.822 | 0.00 | 0.00 |
| ATOM | 4852 | 3HG2 | THR | 318 | 50.856 | 51.588 | 60.675 | 0.00 | 0.00 |
| ATOM | 4853 | OG1  | THR | 318 | 50.732 | 52.233 | 58.272 | 0.00 | 0.00 |
| ATOM | 4854 | HG1  | THR | 318 | 50.429 | 53.144 | 58.288 | 0.00 | 0.00 |
| ATOM | 4855 | C    | THR | 318 | 54.427 | 52.811 | 58.864 | 0.00 | 0.00 |
| ATOM | 4856 | O    | THR | 318 | 55.148 | 51.930 | 58.383 | 0.00 | 0.00 |
| ATOM | 4857 | N    | GLU | 319 | 54.755 | 53.552 | 59.930 | 0.00 | 0.00 |
| ATOM | 4858 | H    | GLU | 319 | 54.082 | 54.281 | 60.119 | 0.00 | 0.00 |
| ATOM | 4859 | CA   | GLU | 319 | 55.779 | 53.310 | 60.928 | 0.00 | 0.00 |
| ATOM | 4860 | HA   | GLU | 319 | 56.540 | 52.686 | 60.460 | 0.00 | 0.00 |
| ATOM | 4861 | CB   | GLU | 319 | 56.415 | 54.642 | 61.178 | 0.00 | 0.00 |

|      |      |      |     |     |        |        |        |      |      |
|------|------|------|-----|-----|--------|--------|--------|------|------|
| ATOM | 4862 | HB2  | GLU | 319 | 56.853 | 55.130 | 60.307 | 0.00 | 0.00 |
| ATOM | 4863 | HB3  | GLU | 319 | 55.617 | 55.296 | 61.528 | 0.00 | 0.00 |
| ATOM | 4864 | CG   | GLU | 319 | 57.527 | 54.536 | 62.291 | 0.00 | 0.00 |
| ATOM | 4865 | HG2  | GLU | 319 | 57.996 | 55.516 | 62.384 | 0.00 | 0.00 |
| ATOM | 4866 | HG3  | GLU | 319 | 57.185 | 54.202 | 63.270 | 0.00 | 0.00 |
| ATOM | 4867 | CD   | GLU | 319 | 58.730 | 53.518 | 61.933 | 0.00 | 0.00 |
| ATOM | 4868 | OE1  | GLU | 319 | 59.796 | 54.012 | 61.564 | 0.00 | 0.00 |
| ATOM | 4869 | OE2  | GLU | 319 | 58.572 | 52.316 | 62.107 | 0.00 | 0.00 |
| ATOM | 4870 | C    | GLU | 319 | 55.220 | 52.477 | 62.052 | 0.00 | 0.00 |
| ATOM | 4871 | O    | GLU | 319 | 54.102 | 52.683 | 62.442 | 0.00 | 0.00 |
| ATOM | 4872 | N    | VAL | 320 | 55.979 | 51.584 | 62.709 | 0.00 | 0.00 |
| ATOM | 4873 | H    | VAL | 320 | 56.970 | 51.506 | 62.533 | 0.00 | 0.00 |
| ATOM | 4874 | CA   | VAL | 320 | 55.517 | 50.873 | 63.901 | 0.00 | 0.00 |
| ATOM | 4875 | HA   | VAL | 320 | 54.470 | 51.100 | 64.101 | 0.00 | 0.00 |
| ATOM | 4876 | CB   | VAL | 320 | 55.591 | 49.351 | 63.687 | 0.00 | 0.00 |
| ATOM | 4877 | HB   | VAL | 320 | 56.661 | 49.149 | 63.641 | 0.00 | 0.00 |
| ATOM | 4878 | CG1  | VAL | 320 | 55.058 | 48.600 | 64.919 | 0.00 | 0.00 |
| ATOM | 4879 | 1HG1 | VAL | 320 | 55.710 | 48.782 | 65.774 | 0.00 | 0.00 |
| ATOM | 4880 | 2HG1 | VAL | 320 | 54.045 | 48.956 | 65.104 | 0.00 | 0.00 |
| ATOM | 4881 | 3HG1 | VAL | 320 | 55.131 | 47.521 | 64.777 | 0.00 | 0.00 |
| ATOM | 4882 | CG2  | VAL | 320 | 54.807 | 48.822 | 62.433 | 0.00 | 0.00 |
| ATOM | 4883 | 1HG2 | VAL | 320 | 54.764 | 47.734 | 62.484 | 0.00 | 0.00 |
| ATOM | 4884 | 2HG2 | VAL | 320 | 53.831 | 49.302 | 62.360 | 0.00 | 0.00 |
| ATOM | 4885 | 3HG2 | VAL | 320 | 55.321 | 49.126 | 61.521 | 0.00 | 0.00 |
| ATOM | 4886 | C    | VAL | 320 | 56.255 | 51.344 | 65.180 | 0.00 | 0.00 |
| ATOM | 4887 | O    | VAL | 320 | 57.500 | 51.417 | 65.243 | 0.00 | 0.00 |

|      |      |      |     |     |        |        |        |      |      |
|------|------|------|-----|-----|--------|--------|--------|------|------|
| ATOM | 4888 | N    | ILE | 321 | 55.479 | 51.585 | 66.266 | 0.00 | 0.00 |
| ATOM | 4889 | H    | ILE | 321 | 54.480 | 51.533 | 66.121 | 0.00 | 0.00 |
| ATOM | 4890 | CA   | ILE | 321 | 56.066 | 51.516 | 67.632 | 0.00 | 0.00 |
| ATOM | 4891 | HA   | ILE | 321 | 57.150 | 51.453 | 67.545 | 0.00 | 0.00 |
| ATOM | 4892 | CB   | ILE | 321 | 55.736 | 52.837 | 68.390 | 0.00 | 0.00 |
| ATOM | 4893 | HB   | ILE | 321 | 54.765 | 53.189 | 68.041 | 0.00 | 0.00 |
| ATOM | 4894 | CG2  | ILE | 321 | 55.680 | 52.661 | 69.930 | 0.00 | 0.00 |
| ATOM | 4895 | 1HG2 | ILE | 321 | 56.598 | 52.353 | 70.430 | 0.00 | 0.00 |
| ATOM | 4896 | 2HG2 | ILE | 321 | 55.486 | 53.602 | 70.445 | 0.00 | 0.00 |
| ATOM | 4897 | 3HG2 | ILE | 321 | 54.823 | 52.007 | 70.091 | 0.00 | 0.00 |
| ATOM | 4898 | CG1  | ILE | 321 | 56.737 | 53.890 | 67.918 | 0.00 | 0.00 |
| ATOM | 4899 | 2HG1 | ILE | 321 | 57.633 | 53.536 | 68.427 | 0.00 | 0.00 |
| ATOM | 4900 | 3HG1 | ILE | 321 | 56.789 | 53.801 | 66.833 | 0.00 | 0.00 |
| ATOM | 4901 | CD1  | ILE | 321 | 56.366 | 55.293 | 68.445 | 0.00 | 0.00 |
| ATOM | 4902 | 1HD1 | ILE | 321 | 55.318 | 55.471 | 68.204 | 0.00 | 0.00 |
| ATOM | 4903 | 2HD1 | ILE | 321 | 56.546 | 55.308 | 69.520 | 0.00 | 0.00 |
| ATOM | 4904 | 3HD1 | ILE | 321 | 56.960 | 56.016 | 67.886 | 0.00 | 0.00 |
| ATOM | 4905 | C    | ILE | 321 | 55.670 | 50.232 | 68.372 | 0.00 | 0.00 |
| ATOM | 4906 | O    | ILE | 321 | 54.541 | 49.812 | 68.465 | 0.00 | 0.00 |
| ATOM | 4907 | N    | ALA | 322 | 56.731 | 49.645 | 68.818 | 0.00 | 0.00 |
| ATOM | 4908 | H    | ALA | 322 | 57.622 | 50.119 | 68.764 | 0.00 | 0.00 |
| ATOM | 4909 | CA   | ALA | 322 | 56.622 | 48.390 | 69.614 | 0.00 | 0.00 |
| ATOM | 4910 | HA   | ALA | 322 | 55.950 | 47.709 | 69.092 | 0.00 | 0.00 |
| ATOM | 4911 | CB   | ALA | 322 | 58.005 | 47.779 | 69.581 | 0.00 | 0.00 |
| ATOM | 4912 | HB1  | ALA | 322 | 58.750 | 48.444 | 70.018 | 0.00 | 0.00 |
| ATOM | 4913 | HB2  | ALA | 322 | 58.072 | 46.847 | 70.143 | 0.00 | 0.00 |



|      |      |     |     |     |        |        |        |      |      |
|------|------|-----|-----|-----|--------|--------|--------|------|------|
| ATOM | 4914 | HB3 | ALA | 322 | 58.208 | 47.422 | 68.572 | 0.00 | 0.00 |
| ATOM | 4915 | C   | ALA | 322 | 56.153 | 48.677 | 71.019 | 0.00 | 0.00 |
| ATOM | 4916 | O   | ALA | 322 | 57.034 | 49.093 | 71.791 | 0.00 | 0.00 |
| ATOM | 4917 | N   | ALA | 323 | 54.881 | 48.644 | 71.301 | 0.00 | 0.00 |
| ATOM | 4918 | H   | ALA | 323 | 54.328 | 48.257 | 70.549 | 0.00 | 0.00 |
| ATOM | 4919 | CA  | ALA | 323 | 54.218 | 49.042 | 72.580 | 0.00 | 0.00 |
| ATOM | 4920 | HA  | ALA | 323 | 54.908 | 49.678 | 73.135 | 0.00 | 0.00 |
| ATOM | 4921 | CB  | ALA | 323 | 52.965 | 49.983 | 72.394 | 0.00 | 0.00 |
| ATOM | 4922 | HB1 | ALA | 323 | 52.086 | 49.477 | 71.996 | 0.00 | 0.00 |
| ATOM | 4923 | HB2 | ALA | 323 | 52.802 | 50.673 | 73.223 | 0.00 | 0.00 |
| ATOM | 4924 | HB3 | ALA | 323 | 53.189 | 50.655 | 71.565 | 0.00 | 0.00 |
| ATOM | 4925 | C   | ALA | 323 | 53.866 | 47.836 | 73.522 | 0.00 | 0.00 |
| ATOM | 4926 | O   | ALA | 323 | 53.270 | 48.005 | 74.574 | 0.00 | 0.00 |
| ATOM | 4927 | N   | GLU | 324 | 54.302 | 46.582 | 73.178 | 0.00 | 0.00 |
| ATOM | 4928 | H   | GLU | 324 | 54.754 | 46.508 | 72.278 | 0.00 | 0.00 |
| ATOM | 4929 | CA  | GLU | 324 | 54.114 | 45.316 | 73.956 | 0.00 | 0.00 |
| ATOM | 4930 | HA  | GLU | 324 | 53.037 | 45.176 | 74.053 | 0.00 | 0.00 |
| ATOM | 4931 | CB  | GLU | 324 | 54.772 | 44.219 | 73.008 | 0.00 | 0.00 |
| ATOM | 4932 | HB2 | GLU | 324 | 54.363 | 44.271 | 71.999 | 0.00 | 0.00 |
| ATOM | 4933 | HB3 | GLU | 324 | 55.832 | 44.418 | 72.849 | 0.00 | 0.00 |
| ATOM | 4934 | CG  | GLU | 324 | 54.528 | 42.809 | 73.544 | 0.00 | 0.00 |
| ATOM | 4935 | HG2 | GLU | 324 | 53.802 | 42.883 | 74.355 | 0.00 | 0.00 |
| ATOM | 4936 | HG3 | GLU | 324 | 54.010 | 42.292 | 72.737 | 0.00 | 0.00 |
| ATOM | 4937 | CD  | GLU | 324 | 55.753 | 42.101 | 74.002 | 0.00 | 0.00 |
| ATOM | 4938 | OE1 | GLU | 324 | 55.908 | 41.829 | 75.228 | 0.00 | 0.00 |
| ATOM | 4939 | OE2 | GLU | 324 | 56.420 | 41.708 | 73.100 | 0.00 | 0.00 |

|      |      |     |     |     |        |        |        |      |      |
|------|------|-----|-----|-----|--------|--------|--------|------|------|
| ATOM | 4940 | C   | GLU | 324 | 54.811 | 45.379 | 75.295 | 0.00 | 0.00 |
| ATOM | 4941 | O   | GLU | 324 | 55.993 | 45.201 | 75.380 | 0.00 | 0.00 |
| ATOM | 4942 | N   | GLY | 325 | 54.025 | 45.482 | 76.326 | 0.00 | 0.00 |
| ATOM | 4943 | H   | GLY | 325 | 53.065 | 45.627 | 76.049 | 0.00 | 0.00 |
| ATOM | 4944 | CA  | GLY | 325 | 54.401 | 45.542 | 77.699 | 0.00 | 0.00 |
| ATOM | 4945 | HA2 | GLY | 325 | 53.801 | 44.841 | 78.279 | 0.00 | 0.00 |
| ATOM | 4946 | HA3 | GLY | 325 | 55.394 | 45.110 | 77.829 | 0.00 | 0.00 |
| ATOM | 4947 | C   | GLY | 325 | 54.413 | 47.035 | 78.234 | 0.00 | 0.00 |
| ATOM | 4948 | O   | GLY | 325 | 54.395 | 47.254 | 79.451 | 0.00 | 0.00 |
| ATOM | 4949 | N   | LYS | 326 | 54.354 | 48.013 | 77.337 | 0.00 | 0.00 |
| ATOM | 4950 | H   | LYS | 326 | 54.180 | 47.770 | 76.373 | 0.00 | 0.00 |
| ATOM | 4951 | CA  | LYS | 326 | 54.406 | 49.445 | 77.640 | 0.00 | 0.00 |
| ATOM | 4952 | HA  | LYS | 326 | 55.139 | 49.561 | 78.438 | 0.00 | 0.00 |
| ATOM | 4953 | CB  | LYS | 326 | 54.821 | 50.299 | 76.421 | 0.00 | 0.00 |
| ATOM | 4954 | HB2 | LYS | 326 | 54.098 | 50.071 | 75.638 | 0.00 | 0.00 |
| ATOM | 4955 | HB3 | LYS | 326 | 54.767 | 51.357 | 76.680 | 0.00 | 0.00 |
| ATOM | 4956 | CG  | LYS | 326 | 56.238 | 50.146 | 75.865 | 0.00 | 0.00 |
| ATOM | 4957 | HG2 | LYS | 326 | 56.395 | 49.114 | 75.553 | 0.00 | 0.00 |
| ATOM | 4958 | HG3 | LYS | 326 | 56.420 | 50.751 | 74.977 | 0.00 | 0.00 |
| ATOM | 4959 | CD  | LYS | 326 | 57.341 | 50.452 | 76.936 | 0.00 | 0.00 |
| ATOM | 4960 | HD2 | LYS | 326 | 57.316 | 51.459 | 77.353 | 0.00 | 0.00 |
| ATOM | 4961 | HD3 | LYS | 326 | 57.096 | 49.771 | 77.750 | 0.00 | 0.00 |
| ATOM | 4962 | CE  | LYS | 326 | 58.798 | 50.111 | 76.581 | 0.00 | 0.00 |
| ATOM | 4963 | HE2 | LYS | 326 | 59.258 | 50.792 | 75.865 | 0.00 | 0.00 |
| ATOM | 4964 | HE3 | LYS | 326 | 59.422 | 50.190 | 77.471 | 0.00 | 0.00 |
| ATOM | 4965 | NZ  | LYS | 326 | 58.981 | 48.758 | 76.136 | 0.00 | 0.00 |

|      |      |      |     |     |        |        |        |      |      |
|------|------|------|-----|-----|--------|--------|--------|------|------|
| ATOM | 4966 | HZ1  | LYS | 326 | 58.461 | 48.579 | 75.288 | 0.00 | 0.00 |
| ATOM | 4967 | HZ2  | LYS | 326 | 59.967 | 48.691 | 75.928 | 0.00 | 0.00 |
| ATOM | 4968 | HZ3  | LYS | 326 | 58.643 | 48.031 | 76.750 | 0.00 | 0.00 |
| ATOM | 4969 | C    | LYS | 326 | 53.095 | 49.989 | 78.220 | 0.00 | 0.00 |
| ATOM | 4970 | O    | LYS | 326 | 52.120 | 49.268 | 78.067 | 0.00 | 0.00 |
| ATOM | 4971 | N    | ILE | 327 | 53.086 | 51.183 | 78.791 | 0.00 | 0.00 |
| ATOM | 4972 | H    | ILE | 327 | 53.968 | 51.667 | 78.881 | 0.00 | 0.00 |
| ATOM | 4973 | CA   | ILE | 327 | 51.987 | 51.965 | 79.352 | 0.00 | 0.00 |
| ATOM | 4974 | HA   | ILE | 327 | 51.087 | 51.538 | 78.910 | 0.00 | 0.00 |
| ATOM | 4975 | CB   | ILE | 327 | 51.986 | 51.980 | 80.886 | 0.00 | 0.00 |
| ATOM | 4976 | HB   | ILE | 327 | 53.054 | 52.021 | 81.100 | 0.00 | 0.00 |
| ATOM | 4977 | CG2  | ILE | 327 | 51.346 | 53.135 | 81.668 | 0.00 | 0.00 |
| ATOM | 4978 | 1HG2 | ILE | 327 | 50.296 | 53.053 | 81.389 | 0.00 | 0.00 |
| ATOM | 4979 | 2HG2 | ILE | 327 | 51.486 | 53.015 | 82.742 | 0.00 | 0.00 |
| ATOM | 4980 | 3HG2 | ILE | 327 | 51.708 | 54.096 | 81.304 | 0.00 | 0.00 |
| ATOM | 4981 | CG1  | ILE | 327 | 51.394 | 50.622 | 81.371 | 0.00 | 0.00 |
| ATOM | 4982 | 2HG1 | ILE | 327 | 50.338 | 50.766 | 81.146 | 0.00 | 0.00 |
| ATOM | 4983 | 3HG1 | ILE | 327 | 51.931 | 49.814 | 80.873 | 0.00 | 0.00 |
| ATOM | 4984 | CD1  | ILE | 327 | 51.315 | 50.345 | 82.834 | 0.00 | 0.00 |
| ATOM | 4985 | 1HD1 | ILE | 327 | 50.533 | 50.802 | 83.440 | 0.00 | 0.00 |
| ATOM | 4986 | 2HD1 | ILE | 327 | 51.202 | 49.265 | 82.924 | 0.00 | 0.00 |
| ATOM | 4987 | 3HD1 | ILE | 327 | 52.269 | 50.590 | 83.301 | 0.00 | 0.00 |
| ATOM | 4988 | C    | ILE | 327 | 52.064 | 53.343 | 78.843 | 0.00 | 0.00 |
| ATOM | 4989 | O    | ILE | 327 | 53.034 | 54.092 | 78.958 | 0.00 | 0.00 |
| ATOM | 4990 | N    | VAL | 328 | 50.994 | 53.815 | 78.155 | 0.00 | 0.00 |
| ATOM | 4991 | H    | VAL | 328 | 50.233 | 53.166 | 78.015 | 0.00 | 0.00 |

|      |      |      |     |     |        |        |        |      |      |
|------|------|------|-----|-----|--------|--------|--------|------|------|
| ATOM | 4992 | CA   | VAL | 328 | 50.922 | 55.048 | 77.454 | 0.00 | 0.00 |
| ATOM | 4993 | HA   | VAL | 328 | 51.879 | 55.542 | 77.619 | 0.00 | 0.00 |
| ATOM | 4994 | CB   | VAL | 328 | 50.687 | 54.981 | 75.973 | 0.00 | 0.00 |
| ATOM | 4995 | HB   | VAL | 328 | 49.682 | 54.596 | 75.800 | 0.00 | 0.00 |
| ATOM | 4996 | CG1  | VAL | 328 | 50.710 | 56.273 | 75.148 | 0.00 | 0.00 |
| ATOM | 4997 | 1HG1 | VAL | 328 | 49.921 | 56.978 | 75.410 | 0.00 | 0.00 |
| ATOM | 4998 | 2HG1 | VAL | 328 | 51.722 | 56.678 | 75.138 | 0.00 | 0.00 |
| ATOM | 4999 | 3HG1 | VAL | 328 | 50.391 | 56.076 | 74.125 | 0.00 | 0.00 |
| ATOM | 5000 | CG2  | VAL | 328 | 51.626 | 53.913 | 75.437 | 0.00 | 0.00 |
| ATOM | 5001 | 1HG2 | VAL | 328 | 51.490 | 52.870 | 75.726 | 0.00 | 0.00 |
| ATOM | 5002 | 2HG2 | VAL | 328 | 51.563 | 53.805 | 74.354 | 0.00 | 0.00 |
| ATOM | 5003 | 3HG2 | VAL | 328 | 52.670 | 54.214 | 75.518 | 0.00 | 0.00 |
| ATOM | 5004 | C    | VAL | 328 | 49.835 | 55.974 | 78.097 | 0.00 | 0.00 |
| ATOM | 5005 | O    | VAL | 328 | 48.678 | 55.577 | 78.268 | 0.00 | 0.00 |
| ATOM | 5006 | N    | THR | 329 | 50.278 | 57.139 | 78.377 | 0.00 | 0.00 |
| ATOM | 5007 | H    | THR | 329 | 51.268 | 57.267 | 78.223 | 0.00 | 0.00 |
| ATOM | 5008 | CA   | THR | 329 | 49.549 | 58.305 | 78.920 | 0.00 | 0.00 |
| ATOM | 5009 | HA   | THR | 329 | 48.548 | 57.917 | 79.110 | 0.00 | 0.00 |
| ATOM | 5010 | CB   | THR | 329 | 50.130 | 58.875 | 80.207 | 0.00 | 0.00 |
| ATOM | 5011 | HB   | THR | 329 | 49.509 | 59.675 | 80.612 | 0.00 | 0.00 |
| ATOM | 5012 | CG2  | THR | 329 | 50.417 | 57.896 | 81.317 | 0.00 | 0.00 |
| ATOM | 5013 | 1HG2 | THR | 329 | 49.525 | 57.306 | 81.524 | 0.00 | 0.00 |
| ATOM | 5014 | 2HG2 | THR | 329 | 51.215 | 57.224 | 81.000 | 0.00 | 0.00 |
| ATOM | 5015 | 3HG2 | THR | 329 | 50.870 | 58.475 | 82.122 | 0.00 | 0.00 |
| ATOM | 5016 | OG1  | THR | 329 | 51.435 | 59.371 | 79.859 | 0.00 | 0.00 |
| ATOM | 5017 | HG1  | THR | 329 | 51.582 | 59.562 | 78.930 | 0.00 | 0.00 |

|      |      |     |     |     |        |        |        |      |      |
|------|------|-----|-----|-----|--------|--------|--------|------|------|
| ATOM | 5018 | C   | THR | 329 | 49.500 | 59.391 | 77.810 | 0.00 | 0.00 |
| ATOM | 5019 | O   | THR | 329 | 50.421 | 59.424 | 76.951 | 0.00 | 0.00 |
| ATOM | 5020 | N   | ALA | 330 | 48.544 | 60.347 | 77.895 | 0.00 | 0.00 |
| ATOM | 5021 | H   | ALA | 330 | 47.874 | 60.256 | 78.645 | 0.00 | 0.00 |
| ATOM | 5022 | CA  | ALA | 330 | 48.531 | 61.497 | 77.031 | 0.00 | 0.00 |
| ATOM | 5023 | HA  | ALA | 330 | 48.543 | 61.134 | 76.003 | 0.00 | 0.00 |
| ATOM | 5024 | CB  | ALA | 330 | 47.177 | 62.223 | 77.166 | 0.00 | 0.00 |
| ATOM | 5025 | HB1 | ALA | 330 | 46.322 | 61.550 | 77.232 | 0.00 | 0.00 |
| ATOM | 5026 | HB2 | ALA | 330 | 47.208 | 62.852 | 78.055 | 0.00 | 0.00 |
| ATOM | 5027 | HB3 | ALA | 330 | 47.122 | 62.951 | 76.357 | 0.00 | 0.00 |
| ATOM | 5028 | C   | ALA | 330 | 49.728 | 62.459 | 77.309 | 0.00 | 0.00 |
| ATOM | 5029 | O   | ALA | 330 | 50.394 | 62.424 | 78.365 | 0.00 | 0.00 |
| ATOM | 5030 | N   | GLY | 331 | 50.143 | 63.278 | 76.321 | 0.00 | 0.00 |
| ATOM | 5031 | H   | GLY | 331 | 49.626 | 63.412 | 75.463 | 0.00 | 0.00 |
| ATOM | 5032 | CA  | GLY | 331 | 51.072 | 64.370 | 76.550 | 0.00 | 0.00 |
| ATOM | 5033 | HA2 | GLY | 331 | 52.104 | 64.187 | 76.850 | 0.00 | 0.00 |
| ATOM | 5034 | HA3 | GLY | 331 | 51.223 | 64.944 | 75.636 | 0.00 | 0.00 |
| ATOM | 5035 | C   | GLY | 331 | 50.506 | 65.395 | 77.558 | 0.00 | 0.00 |
| ATOM | 5036 | O   | GLY | 331 | 49.348 | 65.776 | 77.328 | 0.00 | 0.00 |
| ATOM | 5037 | N   | GLY | 332 | 51.226 | 65.816 | 78.624 | 0.00 | 0.00 |
| ATOM | 5038 | H   | GLY | 332 | 52.156 | 65.476 | 78.820 | 0.00 | 0.00 |
| ATOM | 5039 | CA  | GLY | 332 | 50.500 | 66.384 | 79.781 | 0.00 | 0.00 |
| ATOM | 5040 | HA2 | GLY | 332 | 49.531 | 65.934 | 79.995 | 0.00 | 0.00 |
| ATOM | 5041 | HA3 | GLY | 332 | 51.079 | 66.422 | 80.703 | 0.00 | 0.00 |
| ATOM | 5042 | C   | GLY | 332 | 50.165 | 67.866 | 79.662 | 0.00 | 0.00 |
| ATOM | 5043 | O   | GLY | 332 | 50.884 | 68.555 | 78.929 | 0.00 | 0.00 |

|      |      |      |     |     |        |        |        |      |      |
|------|------|------|-----|-----|--------|--------|--------|------|------|
| ATOM | 5044 | N    | ILE | 333 | 49.247 | 68.460 | 80.446 | 0.00 | 0.00 |
| ATOM | 5045 | H    | ILE | 333 | 48.701 | 67.891 | 81.077 | 0.00 | 0.00 |
| ATOM | 5046 | CA   | ILE | 333 | 48.980 | 69.893 | 80.510 | 0.00 | 0.00 |
| ATOM | 5047 | HA   | ILE | 333 | 49.627 | 70.469 | 79.848 | 0.00 | 0.00 |
| ATOM | 5048 | CB   | ILE | 333 | 47.557 | 70.218 | 80.038 | 0.00 | 0.00 |
| ATOM | 5049 | HB   | ILE | 333 | 46.786 | 69.737 | 80.640 | 0.00 | 0.00 |
| ATOM | 5050 | CG2  | ILE | 333 | 47.248 | 71.776 | 80.047 | 0.00 | 0.00 |
| ATOM | 5051 | 1HG2 | ILE | 333 | 47.982 | 72.222 | 79.374 | 0.00 | 0.00 |
| ATOM | 5052 | 2HG2 | ILE | 333 | 46.213 | 72.062 | 79.863 | 0.00 | 0.00 |
| ATOM | 5053 | 3HG2 | ILE | 333 | 47.621 | 72.102 | 81.017 | 0.00 | 0.00 |
| ATOM | 5054 | CG1  | ILE | 333 | 47.289 | 69.653 | 78.622 | 0.00 | 0.00 |
| ATOM | 5055 | 2HG1 | ILE | 333 | 46.715 | 70.372 | 78.038 | 0.00 | 0.00 |
| ATOM | 5056 | 3HG1 | ILE | 333 | 48.261 | 69.529 | 78.145 | 0.00 | 0.00 |
| ATOM | 5057 | CD1  | ILE | 333 | 46.692 | 68.296 | 78.678 | 0.00 | 0.00 |
| ATOM | 5058 | 1HD1 | ILE | 333 | 47.163 | 67.630 | 79.400 | 0.00 | 0.00 |
| ATOM | 5059 | 2HD1 | ILE | 333 | 45.644 | 68.400 | 78.961 | 0.00 | 0.00 |
| ATOM | 5060 | 3HD1 | ILE | 333 | 46.697 | 67.939 | 77.649 | 0.00 | 0.00 |
| ATOM | 5061 | C    | ILE | 333 | 49.326 | 70.441 | 81.799 | 0.00 | 0.00 |
| ATOM | 5062 | O    | ILE | 333 | 48.949 | 70.010 | 82.850 | 0.00 | 0.00 |
| ATOM | 5063 | N    | ASP | 334 | 50.074 | 71.634 | 81.728 | 0.00 | 0.00 |
| ATOM | 5064 | H    | ASP | 334 | 50.135 | 72.037 | 80.804 | 0.00 | 0.00 |
| ATOM | 5065 | CA   | ASP | 334 | 50.035 | 72.508 | 82.843 | 0.00 | 0.00 |
| ATOM | 5066 | HA   | ASP | 334 | 49.217 | 72.118 | 83.449 | 0.00 | 0.00 |
| ATOM | 5067 | CB   | ASP | 334 | 51.353 | 72.506 | 83.621 | 0.00 | 0.00 |
| ATOM | 5068 | HB2  | ASP | 334 | 51.872 | 71.548 | 83.628 | 0.00 | 0.00 |
| ATOM | 5069 | HB3  | ASP | 334 | 52.027 | 73.150 | 83.056 | 0.00 | 0.00 |

|      |      |      |     |     |        |        |        |      |      |
|------|------|------|-----|-----|--------|--------|--------|------|------|
| ATOM | 5070 | CG   | ASP | 334 | 51.151 | 73.058 | 85.081 | 0.00 | 0.00 |
| ATOM | 5071 | OD1  | ASP | 334 | 51.541 | 74.208 | 85.355 | 0.00 | 0.00 |
| ATOM | 5072 | OD2  | ASP | 334 | 50.552 | 72.325 | 85.906 | 0.00 | 0.00 |
| ATOM | 5073 | C    | ASP | 334 | 49.574 | 73.872 | 82.467 | 0.00 | 0.00 |
| ATOM | 5074 | O    | ASP | 334 | 49.518 | 74.196 | 81.291 | 0.00 | 0.00 |
| ATOM | 5075 | N    | THR | 335 | 49.205 | 74.645 | 83.484 | 0.00 | 0.00 |
| ATOM | 5076 | H    | THR | 335 | 49.256 | 74.237 | 84.407 | 0.00 | 0.00 |
| ATOM | 5077 | CA   | THR | 335 | 48.612 | 76.010 | 83.500 | 0.00 | 0.00 |
| ATOM | 5078 | HA   | THR | 335 | 48.721 | 76.492 | 82.528 | 0.00 | 0.00 |
| ATOM | 5079 | CB   | THR | 335 | 47.161 | 75.902 | 83.817 | 0.00 | 0.00 |
| ATOM | 5080 | HB   | THR | 335 | 46.725 | 76.898 | 83.732 | 0.00 | 0.00 |
| ATOM | 5081 | CG2  | THR | 335 | 46.286 | 75.277 | 82.746 | 0.00 | 0.00 |
| ATOM | 5082 | 1HG2 | THR | 335 | 46.203 | 75.855 | 81.825 | 0.00 | 0.00 |
| ATOM | 5083 | 2HG2 | THR | 335 | 46.662 | 74.326 | 82.370 | 0.00 | 0.00 |
| ATOM | 5084 | 3HG2 | THR | 335 | 45.290 | 75.089 | 83.148 | 0.00 | 0.00 |
| ATOM | 5085 | OG1  | THR | 335 | 46.869 | 75.278 | 85.021 | 0.00 | 0.00 |
| ATOM | 5086 | HG1  | THR | 335 | 47.185 | 74.372 | 85.020 | 0.00 | 0.00 |
| ATOM | 5087 | C    | THR | 335 | 49.256 | 77.100 | 84.357 | 0.00 | 0.00 |
| ATOM | 5088 | O    | THR | 335 | 48.865 | 78.263 | 84.349 | 0.00 | 0.00 |
| ATOM | 5089 | N    | H21 | 336 | 50.258 | 76.773 | 85.156 | 0.00 | 0.00 |
| ATOM | 5090 | H    | H21 | 336 | 50.565 | 75.811 | 85.183 | 0.00 | 0.00 |
| ATOM | 5091 | CA   | H21 | 336 | 50.901 | 77.699 | 86.162 | 0.00 | 0.00 |
| ATOM | 5092 | HA   | H21 | 336 | 50.622 | 78.722 | 85.912 | 0.00 | 0.00 |
| ATOM | 5093 | CB   | H21 | 336 | 50.466 | 77.447 | 87.618 | 0.00 | 0.00 |
| ATOM | 5094 | HB2  | H21 | 336 | 49.402 | 77.221 | 87.680 | 0.00 | 0.00 |
| ATOM | 5095 | HB3  | H21 | 336 | 50.885 | 76.475 | 87.880 | 0.00 | 0.00 |

|      |      |      |     |     |        |        |        |      |      |
|------|------|------|-----|-----|--------|--------|--------|------|------|
| ATOM | 5096 | CG   | H21 | 336 | 50.690 | 78.529 | 88.662 | 0.00 | 0.00 |
| ATOM | 5097 | ND1  | H21 | 336 | 50.122 | 78.585 | 89.936 | 0.00 | 0.00 |
| ATOM | 5098 | HD1  | H21 | 336 | 49.517 | 77.835 | 90.239 | 0.00 | 0.00 |
| ATOM | 5099 | CE1  | H21 | 336 | 50.820 | 79.443 | 90.695 | 0.00 | 0.00 |
| ATOM | 5100 | HE1  | H21 | 336 | 50.664 | 79.607 | 91.751 | 0.00 | 0.00 |
| ATOM | 5101 | NE2  | H21 | 336 | 51.780 | 80.026 | 89.980 | 0.00 | 0.00 |
| ATOM | 5102 | CD2  | H21 | 336 | 51.693 | 79.467 | 88.693 | 0.00 | 0.00 |
| ATOM | 5103 | HD2  | H21 | 336 | 52.343 | 79.672 | 87.855 | 0.00 | 0.00 |
| ATOM | 5104 | C    | H21 | 336 | 52.387 | 77.561 | 85.851 | 0.00 | 0.00 |
| ATOM | 5105 | O    | H21 | 336 | 53.278 | 77.569 | 86.721 | 0.00 | 0.00 |
| ATOM | 5106 | N    | ILE | 337 | 52.745 | 77.452 | 84.570 | 0.00 | 0.00 |
| ATOM | 5107 | H    | ILE | 337 | 52.069 | 77.399 | 83.821 | 0.00 | 0.00 |
| ATOM | 5108 | CA   | ILE | 337 | 54.185 | 77.509 | 84.106 | 0.00 | 0.00 |
| ATOM | 5109 | HA   | ILE | 337 | 54.825 | 76.881 | 84.726 | 0.00 | 0.00 |
| ATOM | 5110 | CB   | ILE | 337 | 54.332 | 76.965 | 82.612 | 0.00 | 0.00 |
| ATOM | 5111 | HB   | ILE | 337 | 53.666 | 77.579 | 82.006 | 0.00 | 0.00 |
| ATOM | 5112 | CG2  | ILE | 337 | 55.697 | 77.130 | 82.012 | 0.00 | 0.00 |
| ATOM | 5113 | 1HG2 | ILE | 337 | 56.458 | 76.755 | 82.697 | 0.00 | 0.00 |
| ATOM | 5114 | 2HG2 | ILE | 337 | 55.722 | 76.782 | 80.979 | 0.00 | 0.00 |
| ATOM | 5115 | 3HG2 | ILE | 337 | 55.868 | 78.203 | 81.921 | 0.00 | 0.00 |
| ATOM | 5116 | CG1  | ILE | 337 | 53.821 | 75.572 | 82.477 | 0.00 | 0.00 |
| ATOM | 5117 | 2HG1 | ILE | 337 | 52.868 | 75.507 | 83.002 | 0.00 | 0.00 |
| ATOM | 5118 | 3HG1 | ILE | 337 | 53.826 | 75.281 | 81.427 | 0.00 | 0.00 |
| ATOM | 5119 | CD1  | ILE | 337 | 54.662 | 74.454 | 83.092 | 0.00 | 0.00 |
| ATOM | 5120 | 1HD1 | ILE | 337 | 54.156 | 73.490 | 83.038 | 0.00 | 0.00 |
| ATOM | 5121 | 2HD1 | ILE | 337 | 55.669 | 74.498 | 82.678 | 0.00 | 0.00 |



ATOM 5122 3HD1 ILE 337 54.846 74.662 84.146 0.00 0.00  
ATOM 5123 C ILE 337 54.556 78.969 84.152 0.00 0.00  
ATOM 5124 O ILE 337 53.913 79.807 83.583 0.00 0.00  
ATOM 5125 N H22 338 55.490 79.368 84.999 0.00 0.00  
ATOM 5126 H H22 338 55.962 78.786 85.676 0.00 0.00  
ATOM 5127 CA H22 338 56.200 80.580 84.908 0.00 0.00  
ATOM 5128 HA H22 338 55.646 81.440 84.532 0.00 0.00  
ATOM 5129 CB H22 338 56.671 81.080 86.291 0.00 0.00  
ATOM 5130 HB2 H22 338 57.235 80.319 86.831 0.00 0.00  
ATOM 5131 HB3 H22 338 57.421 81.868 86.211 0.00 0.00  
ATOM 5132 CG H22 338 55.735 81.687 87.324 0.00 0.00  
ATOM 5133 ND1 H22 338 55.931 82.854 87.995 0.00 0.00  
ATOM 5134 HD1 H22 338 56.381 83.705 87.690 0.00 0.00  
ATOM 5135 CE1 H22 338 55.274 82.784 89.122 0.00 0.00  
ATOM 5136 HE1 H22 338 55.211 83.621 89.802 0.00 0.00  
ATOM 5137 NE2 H22 338 54.617 81.600 89.306 0.00 0.00  
ATOM 5138 CD2 H22 338 54.964 80.859 88.175 0.00 0.00  
ATOM 5139 HD2 H22 338 54.756 79.823 87.952 0.00 0.00  
ATOM 5140 C H22 338 57.459 80.467 84.028 0.00 0.00  
ATOM 5141 O H22 338 58.172 79.494 84.224 0.00 0.00  
ATOM 5142 N TRP 339 57.691 81.388 83.142 0.00 0.00  
ATOM 5143 H TRP 339 57.037 82.158 83.140 0.00 0.00  
ATOM 5144 CA TRP 339 58.752 81.339 82.145 0.00 0.00  
ATOM 5145 HA TRP 339 59.104 80.311 82.060 0.00 0.00  
ATOM 5146 CB TRP 339 58.229 81.764 80.808 0.00 0.00  
ATOM 5147 HB2 TRP 339 57.850 82.783 80.873 0.00 0.00

|      |      |      |     |     |        |        |        |      |      |
|------|------|------|-----|-----|--------|--------|--------|------|------|
| ATOM | 5148 | HB3  | TRP | 339 | 59.082 | 81.910 | 80.145 | 0.00 | 0.00 |
| ATOM | 5149 | CG   | TRP | 339 | 57.224 | 80.966 | 80.164 | 0.00 | 0.00 |
| ATOM | 5150 | CD1  | TRP | 339 | 55.992 | 81.380 | 79.719 | 0.00 | 0.00 |
| ATOM | 5151 | HD1  | TRP | 339 | 55.547 | 82.364 | 79.716 | 0.00 | 0.00 |
| ATOM | 5152 | NE1  | TRP | 339 | 55.414 | 80.395 | 79.008 | 0.00 | 0.00 |
| ATOM | 5153 | HE1  | TRP | 339 | 54.513 | 80.542 | 78.576 | 0.00 | 0.00 |
| ATOM | 5154 | CE2  | TRP | 339 | 56.204 | 79.292 | 78.913 | 0.00 | 0.00 |
| ATOM | 5155 | CZ2  | TRP | 339 | 56.110 | 78.132 | 78.115 | 0.00 | 0.00 |
| ATOM | 5156 | HZ2  | TRP | 339 | 55.283 | 77.852 | 77.478 | 0.00 | 0.00 |
| ATOM | 5157 | CH2  | TRP | 339 | 57.178 | 77.250 | 78.123 | 0.00 | 0.00 |
| ATOM | 5158 | HH2  | TRP | 339 | 56.983 | 76.291 | 77.668 | 0.00 | 0.00 |
| ATOM | 5159 | CZ3  | TRP | 339 | 58.313 | 77.440 | 78.927 | 0.00 | 0.00 |
| ATOM | 5160 | HZ3  | TRP | 339 | 59.019 | 76.626 | 79.007 | 0.00 | 0.00 |
| ATOM | 5161 | CE3  | TRP | 339 | 58.432 | 78.644 | 79.671 | 0.00 | 0.00 |
| ATOM | 5162 | HE3  | TRP | 339 | 59.325 | 78.768 | 80.265 | 0.00 | 0.00 |
| ATOM | 5163 | CD2  | TRP | 339 | 57.383 | 79.612 | 79.622 | 0.00 | 0.00 |
| ATOM | 5164 | C    | TRP | 339 | 59.984 | 82.150 | 82.683 | 0.00 | 0.00 |
| ATOM | 5165 | O    | TRP | 339 | 60.309 | 83.249 | 82.265 | 0.00 | 0.00 |
| ATOM | 5166 | N    | ILE | 340 | 60.644 | 81.516 | 83.650 | 0.00 | 0.00 |
| ATOM | 5167 | H    | ILE | 340 | 60.430 | 80.530 | 83.618 | 0.00 | 0.00 |
| ATOM | 5168 | CA   | ILE | 340 | 61.956 | 81.991 | 84.274 | 0.00 | 0.00 |
| ATOM | 5169 | HA   | ILE | 340 | 61.916 | 83.078 | 84.345 | 0.00 | 0.00 |
| ATOM | 5170 | CB   | ILE | 340 | 62.345 | 81.397 | 85.650 | 0.00 | 0.00 |
| ATOM | 5171 | HB   | ILE | 340 | 62.872 | 80.444 | 85.608 | 0.00 | 0.00 |
| ATOM | 5172 | CG2  | ILE | 340 | 63.388 | 82.321 | 86.280 | 0.00 | 0.00 |
| ATOM | 5173 | 1HG2 | ILE | 340 | 64.360 | 82.291 | 85.787 | 0.00 | 0.00 |

|      |      |      |     |     |        |        |        |      |      |
|------|------|------|-----|-----|--------|--------|--------|------|------|
| ATOM | 5174 | 2HG2 | ILE | 340 | 63.017 | 83.345 | 86.224 | 0.00 | 0.00 |
| ATOM | 5175 | 3HG2 | ILE | 340 | 63.479 | 81.976 | 87.310 | 0.00 | 0.00 |
| ATOM | 5176 | CG1  | ILE | 340 | 61.162 | 81.133 | 86.622 | 0.00 | 0.00 |
| ATOM | 5177 | 2HG1 | ILE | 340 | 60.434 | 80.425 | 86.225 | 0.00 | 0.00 |
| ATOM | 5178 | 3HG1 | ILE | 340 | 61.495 | 80.581 | 87.501 | 0.00 | 0.00 |
| ATOM | 5179 | CD1  | ILE | 340 | 60.326 | 82.435 | 86.909 | 0.00 | 0.00 |
| ATOM | 5180 | 1HD1 | ILE | 340 | 59.872 | 82.856 | 86.012 | 0.00 | 0.00 |
| ATOM | 5181 | 2HD1 | ILE | 340 | 59.534 | 82.331 | 87.650 | 0.00 | 0.00 |
| ATOM | 5182 | 3HD1 | ILE | 340 | 60.946 | 83.210 | 87.358 | 0.00 | 0.00 |
| ATOM | 5183 | C    | ILE | 340 | 63.152 | 81.902 | 83.272 | 0.00 | 0.00 |
| ATOM | 5184 | O    | ILE | 340 | 64.007 | 82.735 | 83.146 | 0.00 | 0.00 |
| ATOM | 5185 | N    | CYS | 341 | 63.245 | 80.820 | 82.521 | 0.00 | 0.00 |
| ATOM | 5186 | H    | CYS | 341 | 62.404 | 80.262 | 82.565 | 0.00 | 0.00 |
| ATOM | 5187 | CA   | CYS | 341 | 64.346 | 80.265 | 81.714 | 0.00 | 0.00 |
| ATOM | 5188 | HA   | CYS | 341 | 64.977 | 81.081 | 81.359 | 0.00 | 0.00 |
| ATOM | 5189 | CB   | CYS | 341 | 65.108 | 79.388 | 82.664 | 0.00 | 0.00 |
| ATOM | 5190 | HB2  | CYS | 341 | 65.199 | 79.986 | 83.570 | 0.00 | 0.00 |
| ATOM | 5191 | HB3  | CYS | 341 | 64.424 | 78.594 | 82.961 | 0.00 | 0.00 |
| ATOM | 5192 | SG   | CYS | 341 | 66.619 | 78.735 | 82.018 | 0.00 | 0.00 |
| ATOM | 5193 | HG   | CYS | 341 | 67.143 | 78.314 | 83.173 | 0.00 | 0.00 |
| ATOM | 5194 | C    | CYS | 341 | 63.759 | 79.443 | 80.557 | 0.00 | 0.00 |
| ATOM | 5195 | O    | CYS | 341 | 62.885 | 78.592 | 80.713 | 0.00 | 0.00 |
| ATOM | 5196 | N    | PRO | 342 | 64.253 | 79.662 | 79.383 | 0.00 | 0.00 |
| ATOM | 5197 | CD   | PRO | 342 | 65.288 | 80.601 | 78.992 | 0.00 | 0.00 |
| ATOM | 5198 | HD2  | PRO | 342 | 65.136 | 81.586 | 79.433 | 0.00 | 0.00 |
| ATOM | 5199 | HD3  | PRO | 342 | 66.283 | 80.198 | 79.183 | 0.00 | 0.00 |

|      |      |      |     |     |        |        |        |      |      |
|------|------|------|-----|-----|--------|--------|--------|------|------|
| ATOM | 5200 | CG   | PRO | 342 | 65.239 | 80.636 | 77.458 | 0.00 | 0.00 |
| ATOM | 5201 | HG2  | PRO | 342 | 64.514 | 81.362 | 77.089 | 0.00 | 0.00 |
| ATOM | 5202 | HG3  | PRO | 342 | 66.249 | 80.923 | 77.165 | 0.00 | 0.00 |
| ATOM | 5203 | CB   | PRO | 342 | 64.823 | 79.216 | 77.035 | 0.00 | 0.00 |
| ATOM | 5204 | HB2  | PRO | 342 | 64.267 | 79.157 | 76.099 | 0.00 | 0.00 |
| ATOM | 5205 | HB3  | PRO | 342 | 65.756 | 78.658 | 76.952 | 0.00 | 0.00 |
| ATOM | 5206 | CA   | PRO | 342 | 63.932 | 78.799 | 78.176 | 0.00 | 0.00 |
| ATOM | 5207 | HA   | PRO | 342 | 62.882 | 78.997 | 77.962 | 0.00 | 0.00 |
| ATOM | 5208 | C    | PRO | 342 | 64.061 | 77.318 | 78.474 | 0.00 | 0.00 |
| ATOM | 5209 | O    | PRO | 342 | 63.267 | 76.503 | 78.016 | 0.00 | 0.00 |
| ATOM | 5210 | N    | GLN | 343 | 65.087 | 76.896 | 79.177 | 0.00 | 0.00 |
| ATOM | 5211 | H    | GLN | 343 | 65.671 | 77.625 | 79.561 | 0.00 | 0.00 |
| ATOM | 5212 | CA   | GLN | 343 | 65.491 | 75.491 | 79.536 | 0.00 | 0.00 |
| ATOM | 5213 | HA   | GLN | 343 | 65.550 | 74.910 | 78.616 | 0.00 | 0.00 |
| ATOM | 5214 | CB   | GLN | 343 | 66.845 | 75.453 | 80.239 | 0.00 | 0.00 |
| ATOM | 5215 | HB2  | GLN | 343 | 66.762 | 75.960 | 81.200 | 0.00 | 0.00 |
| ATOM | 5216 | HB3  | GLN | 343 | 67.024 | 74.417 | 80.524 | 0.00 | 0.00 |
| ATOM | 5217 | CG   | GLN | 343 | 68.094 | 76.021 | 79.512 | 0.00 | 0.00 |
| ATOM | 5218 | HG2  | GLN | 343 | 68.117 | 77.102 | 79.647 | 0.00 | 0.00 |
| ATOM | 5219 | HG3  | GLN | 343 | 68.884 | 75.720 | 80.199 | 0.00 | 0.00 |
| ATOM | 5220 | CD   | GLN | 343 | 68.274 | 75.651 | 78.053 | 0.00 | 0.00 |
| ATOM | 5221 | OE1  | GLN | 343 | 67.641 | 76.282 | 77.151 | 0.00 | 0.00 |
| ATOM | 5222 | NE2  | GLN | 343 | 69.151 | 74.692 | 77.799 | 0.00 | 0.00 |
| ATOM | 5223 | 1HE2 | GLN | 343 | 69.078 | 74.275 | 76.882 | 0.00 | 0.00 |
| ATOM | 5224 | 2HE2 | GLN | 343 | 69.501 | 74.097 | 78.537 | 0.00 | 0.00 |
| ATOM | 5225 | C    | GLN | 343 | 64.414 | 74.720 | 80.337 | 0.00 | 0.00 |

|      |      |      |     |     |        |        |        |      |      |
|------|------|------|-----|-----|--------|--------|--------|------|------|
| ATOM | 5226 | O    | GLN | 343 | 64.451 | 73.496 | 80.404 | 0.00 | 0.00 |
| ATOM | 5227 | N    | GLN | 344 | 63.370 | 75.433 | 80.881 | 0.00 | 0.00 |
| ATOM | 5228 | H    | GLN | 344 | 63.275 | 76.435 | 80.800 | 0.00 | 0.00 |
| ATOM | 5229 | CA   | GLN | 344 | 62.259 | 74.767 | 81.603 | 0.00 | 0.00 |
| ATOM | 5230 | HA   | GLN | 344 | 62.692 | 74.124 | 82.369 | 0.00 | 0.00 |
| ATOM | 5231 | CB   | GLN | 344 | 61.320 | 75.819 | 82.195 | 0.00 | 0.00 |
| ATOM | 5232 | HB2  | GLN | 344 | 61.254 | 76.573 | 81.411 | 0.00 | 0.00 |
| ATOM | 5233 | HB3  | GLN | 344 | 60.335 | 75.386 | 82.372 | 0.00 | 0.00 |
| ATOM | 5234 | CG   | GLN | 344 | 61.911 | 76.441 | 83.445 | 0.00 | 0.00 |
| ATOM | 5235 | HG2  | GLN | 344 | 61.882 | 75.660 | 84.205 | 0.00 | 0.00 |
| ATOM | 5236 | HG3  | GLN | 344 | 62.962 | 76.718 | 83.354 | 0.00 | 0.00 |
| ATOM | 5237 | CD   | GLN | 344 | 61.049 | 77.556 | 84.073 | 0.00 | 0.00 |
| ATOM | 5238 | OE1  | GLN | 344 | 61.315 | 78.716 | 83.793 | 0.00 | 0.00 |
| ATOM | 5239 | NE2  | GLN | 344 | 59.990 | 77.298 | 84.769 | 0.00 | 0.00 |
| ATOM | 5240 | 1HE2 | GLN | 344 | 59.478 | 78.101 | 85.106 | 0.00 | 0.00 |
| ATOM | 5241 | 2HE2 | GLN | 344 | 59.495 | 76.418 | 84.749 | 0.00 | 0.00 |
| ATOM | 5242 | C    | GLN | 344 | 61.424 | 73.836 | 80.652 | 0.00 | 0.00 |
| ATOM | 5243 | O    | GLN | 344 | 60.729 | 73.006 | 81.143 | 0.00 | 0.00 |
| ATOM | 5244 | N    | ALA | 345 | 61.691 | 73.896 | 79.373 | 0.00 | 0.00 |
| ATOM | 5245 | H    | ALA | 345 | 62.357 | 74.576 | 79.036 | 0.00 | 0.00 |
| ATOM | 5246 | CA   | ALA | 345 | 61.147 | 73.027 | 78.361 | 0.00 | 0.00 |
| ATOM | 5247 | HA   | ALA | 345 | 60.650 | 72.146 | 78.766 | 0.00 | 0.00 |
| ATOM | 5248 | CB   | ALA | 345 | 60.049 | 73.843 | 77.704 | 0.00 | 0.00 |
| ATOM | 5249 | HB1  | ALA | 345 | 59.279 | 74.086 | 78.437 | 0.00 | 0.00 |
| ATOM | 5250 | HB2  | ALA | 345 | 60.444 | 74.709 | 77.174 | 0.00 | 0.00 |
| ATOM | 5251 | HB3  | ALA | 345 | 59.567 | 73.236 | 76.938 | 0.00 | 0.00 |

|      |      |     |     |     |        |        |        |      |      |
|------|------|-----|-----|-----|--------|--------|--------|------|------|
| ATOM | 5252 | C   | ALA | 345 | 62.235 | 72.476 | 77.356 | 0.00 | 0.00 |
| ATOM | 5253 | O   | ALA | 345 | 62.103 | 71.359 | 76.885 | 0.00 | 0.00 |
| ATOM | 5254 | N   | GLU | 346 | 63.352 | 73.217 | 77.107 | 0.00 | 0.00 |
| ATOM | 5255 | H   | GLU | 346 | 63.339 | 74.187 | 77.388 | 0.00 | 0.00 |
| ATOM | 5256 | CA  | GLU | 346 | 64.417 | 72.865 | 76.124 | 0.00 | 0.00 |
| ATOM | 5257 | HA  | GLU | 346 | 63.965 | 72.344 | 75.280 | 0.00 | 0.00 |
| ATOM | 5258 | CB  | GLU | 346 | 65.271 | 74.093 | 75.711 | 0.00 | 0.00 |
| ATOM | 5259 | HB2 | GLU | 346 | 65.540 | 74.640 | 76.614 | 0.00 | 0.00 |
| ATOM | 5260 | HB3 | GLU | 346 | 66.188 | 73.715 | 75.260 | 0.00 | 0.00 |
| ATOM | 5261 | CG  | GLU | 346 | 64.637 | 75.087 | 74.818 | 0.00 | 0.00 |
| ATOM | 5262 | HG2 | GLU | 346 | 63.590 | 75.116 | 75.117 | 0.00 | 0.00 |
| ATOM | 5263 | HG3 | GLU | 346 | 64.954 | 76.121 | 74.958 | 0.00 | 0.00 |
| ATOM | 5264 | CD  | GLU | 346 | 64.701 | 74.617 | 73.364 | 0.00 | 0.00 |
| ATOM | 5265 | OE1 | GLU | 346 | 64.658 | 75.519 | 72.480 | 0.00 | 0.00 |
| ATOM | 5266 | OE2 | GLU | 346 | 64.805 | 73.463 | 73.056 | 0.00 | 0.00 |
| ATOM | 5267 | C   | GLU | 346 | 65.377 | 71.766 | 76.674 | 0.00 | 0.00 |
| ATOM | 5268 | O   | GLU | 346 | 66.167 | 71.150 | 75.951 | 0.00 | 0.00 |
| ATOM | 5269 | N   | GLU | 347 | 65.295 | 71.582 | 77.976 | 0.00 | 0.00 |
| ATOM | 5270 | H   | GLU | 347 | 64.653 | 72.156 | 78.503 | 0.00 | 0.00 |
| ATOM | 5271 | CA  | GLU | 347 | 65.939 | 70.393 | 78.558 | 0.00 | 0.00 |
| ATOM | 5272 | HA  | GLU | 347 | 66.264 | 69.674 | 77.806 | 0.00 | 0.00 |
| ATOM | 5273 | CB  | GLU | 347 | 67.116 | 70.867 | 79.409 | 0.00 | 0.00 |
| ATOM | 5274 | HB2 | GLU | 347 | 67.440 | 69.973 | 79.943 | 0.00 | 0.00 |
| ATOM | 5275 | HB3 | GLU | 347 | 66.788 | 71.461 | 80.261 | 0.00 | 0.00 |
| ATOM | 5276 | CG  | GLU | 347 | 68.301 | 71.483 | 78.770 | 0.00 | 0.00 |
| ATOM | 5277 | HG2 | GLU | 347 | 68.739 | 70.789 | 78.052 | 0.00 | 0.00 |

|      |      |     |     |     |        |        |        |      |      |
|------|------|-----|-----|-----|--------|--------|--------|------|------|
| ATOM | 5278 | HG3 | GLU | 347 | 68.064 | 72.475 | 78.384 | 0.00 | 0.00 |
| ATOM | 5279 | CD  | GLU | 347 | 69.401 | 71.898 | 79.797 | 0.00 | 0.00 |
| ATOM | 5280 | OE1 | GLU | 347 | 70.280 | 70.994 | 80.110 | 0.00 | 0.00 |
| ATOM | 5281 | OE2 | GLU | 347 | 69.555 | 73.062 | 80.165 | 0.00 | 0.00 |
| ATOM | 5282 | C   | GLU | 347 | 64.871 | 69.538 | 79.362 | 0.00 | 0.00 |
| ATOM | 5283 | O   | GLU | 347 | 64.744 | 68.339 | 79.181 | 0.00 | 0.00 |
| ATOM | 5284 | N   | ALA | 348 | 64.070 | 70.292 | 80.130 | 0.00 | 0.00 |
| ATOM | 5285 | H   | ALA | 348 | 64.368 | 71.239 | 80.314 | 0.00 | 0.00 |
| ATOM | 5286 | CA  | ALA | 348 | 63.226 | 69.661 | 81.119 | 0.00 | 0.00 |
| ATOM | 5287 | HA  | ALA | 348 | 63.705 | 68.804 | 81.593 | 0.00 | 0.00 |
| ATOM | 5288 | CB  | ALA | 348 | 62.925 | 70.668 | 82.228 | 0.00 | 0.00 |
| ATOM | 5289 | HB1 | ALA | 348 | 62.360 | 70.229 | 83.050 | 0.00 | 0.00 |
| ATOM | 5290 | HB2 | ALA | 348 | 63.867 | 70.961 | 82.691 | 0.00 | 0.00 |
| ATOM | 5291 | HB3 | ALA | 348 | 62.339 | 71.434 | 81.719 | 0.00 | 0.00 |
| ATOM | 5292 | C   | ALA | 348 | 61.933 | 69.095 | 80.589 | 0.00 | 0.00 |
| ATOM | 5293 | O   | ALA | 348 | 61.116 | 68.732 | 81.412 | 0.00 | 0.00 |
| ATOM | 5294 | N   | LEU | 349 | 61.673 | 68.880 | 79.310 | 0.00 | 0.00 |
| ATOM | 5295 | H   | LEU | 349 | 62.227 | 69.390 | 78.637 | 0.00 | 0.00 |
| ATOM | 5296 | CA  | LEU | 349 | 60.482 | 68.258 | 78.727 | 0.00 | 0.00 |
| ATOM | 5297 | HA  | LEU | 349 | 59.581 | 68.752 | 79.091 | 0.00 | 0.00 |
| ATOM | 5298 | CB  | LEU | 349 | 60.491 | 68.509 | 77.150 | 0.00 | 0.00 |
| ATOM | 5299 | HB2 | LEU | 349 | 60.422 | 69.591 | 77.043 | 0.00 | 0.00 |
| ATOM | 5300 | HB3 | LEU | 349 | 61.464 | 68.425 | 76.667 | 0.00 | 0.00 |
| ATOM | 5301 | CG  | LEU | 349 | 59.411 | 67.930 | 76.174 | 0.00 | 0.00 |
| ATOM | 5302 | HG  | LEU | 349 | 59.537 | 66.853 | 76.064 | 0.00 | 0.00 |
| ATOM | 5303 | CD1 | LEU | 349 | 58.089 | 68.173 | 76.772 | 0.00 | 0.00 |

|      |      |      |     |     |        |        |        |      |      |
|------|------|------|-----|-----|--------|--------|--------|------|------|
| ATOM | 5304 | 1HD1 | LEU | 349 | 57.251 | 68.062 | 76.084 | 0.00 | 0.00 |
| ATOM | 5305 | 2HD1 | LEU | 349 | 57.906 | 67.624 | 77.696 | 0.00 | 0.00 |
| ATOM | 5306 | 3HD1 | LEU | 349 | 58.043 | 69.195 | 77.148 | 0.00 | 0.00 |
| ATOM | 5307 | CD2  | LEU | 349 | 59.439 | 68.561 | 74.784 | 0.00 | 0.00 |
| ATOM | 5308 | 1HD2 | LEU | 349 | 60.405 | 68.400 | 74.306 | 0.00 | 0.00 |
| ATOM | 5309 | 2HD2 | LEU | 349 | 58.720 | 68.122 | 74.093 | 0.00 | 0.00 |
| ATOM | 5310 | 3HD2 | LEU | 349 | 59.257 | 69.632 | 74.870 | 0.00 | 0.00 |
| ATOM | 5311 | C    | LEU | 349 | 60.381 | 66.810 | 79.121 | 0.00 | 0.00 |
| ATOM | 5312 | O    | LEU | 349 | 59.475 | 66.071 | 78.840 | 0.00 | 0.00 |
| ATOM | 5313 | N    | VAL | 350 | 61.396 | 66.295 | 79.843 | 0.00 | 0.00 |
| ATOM | 5314 | H    | VAL | 350 | 62.221 | 66.832 | 80.069 | 0.00 | 0.00 |
| ATOM | 5315 | CA   | VAL | 350 | 61.378 | 64.968 | 80.468 | 0.00 | 0.00 |
| ATOM | 5316 | HA   | VAL | 350 | 61.158 | 64.269 | 79.660 | 0.00 | 0.00 |
| ATOM | 5317 | CB   | VAL | 350 | 62.715 | 64.595 | 81.272 | 0.00 | 0.00 |
| ATOM | 5318 | HB   | VAL | 350 | 62.433 | 63.787 | 81.948 | 0.00 | 0.00 |
| ATOM | 5319 | CG1  | VAL | 350 | 63.745 | 64.156 | 80.245 | 0.00 | 0.00 |
| ATOM | 5320 | 1HG1 | VAL | 350 | 63.272 | 63.371 | 79.653 | 0.00 | 0.00 |
| ATOM | 5321 | 2HG1 | VAL | 350 | 64.010 | 65.011 | 79.623 | 0.00 | 0.00 |
| ATOM | 5322 | 3HG1 | VAL | 350 | 64.629 | 63.758 | 80.742 | 0.00 | 0.00 |
| ATOM | 5323 | CG2  | VAL | 350 | 63.369 | 65.777 | 82.062 | 0.00 | 0.00 |
| ATOM | 5324 | 1HG2 | VAL | 350 | 63.867 | 66.468 | 81.382 | 0.00 | 0.00 |
| ATOM | 5325 | 2HG2 | VAL | 350 | 62.476 | 66.276 | 82.438 | 0.00 | 0.00 |
| ATOM | 5326 | 3HG2 | VAL | 350 | 63.972 | 65.393 | 82.885 | 0.00 | 0.00 |
| ATOM | 5327 | C    | VAL | 350 | 60.298 | 64.795 | 81.444 | 0.00 | 0.00 |
| ATOM | 5328 | O    | VAL | 350 | 59.888 | 63.672 | 81.720 | 0.00 | 0.00 |
| ATOM | 5329 | N    | SER | 351 | 59.723 | 65.903 | 81.990 | 0.00 | 0.00 |



|      |      |      |     |     |        |        |        |      |      |
|------|------|------|-----|-----|--------|--------|--------|------|------|
| ATOM | 5330 | H    | SER | 351 | 60.001 | 66.810 | 81.642 | 0.00 | 0.00 |
| ATOM | 5331 | CA   | SER | 351 | 58.675 | 65.842 | 82.918 | 0.00 | 0.00 |
| ATOM | 5332 | HA   | SER | 351 | 58.821 | 65.064 | 83.667 | 0.00 | 0.00 |
| ATOM | 5333 | CB   | SER | 351 | 58.495 | 67.115 | 83.849 | 0.00 | 0.00 |
| ATOM | 5334 | HB2  | SER | 351 | 58.516 | 67.930 | 83.126 | 0.00 | 0.00 |
| ATOM | 5335 | HB3  | SER | 351 | 57.580 | 67.033 | 84.436 | 0.00 | 0.00 |
| ATOM | 5336 | OG   | SER | 351 | 59.596 | 67.164 | 84.784 | 0.00 | 0.00 |
| ATOM | 5337 | HG   | SER | 351 | 59.404 | 67.823 | 85.455 | 0.00 | 0.00 |
| ATOM | 5338 | C    | SER | 351 | 57.338 | 65.512 | 82.255 | 0.00 | 0.00 |
| ATOM | 5339 | O    | SER | 351 | 56.319 | 65.323 | 82.920 | 0.00 | 0.00 |
| ATOM | 5340 | N    | GLY | 352 | 57.197 | 65.314 | 80.917 | 0.00 | 0.00 |
| ATOM | 5341 | H    | GLY | 352 | 57.920 | 65.597 | 80.271 | 0.00 | 0.00 |
| ATOM | 5342 | CA   | GLY | 352 | 56.100 | 64.728 | 80.252 | 0.00 | 0.00 |
| ATOM | 5343 | HA2  | GLY | 352 | 56.500 | 64.494 | 79.266 | 0.00 | 0.00 |
| ATOM | 5344 | HA3  | GLY | 352 | 55.852 | 63.770 | 80.710 | 0.00 | 0.00 |
| ATOM | 5345 | C    | GLY | 352 | 54.832 | 65.610 | 80.206 | 0.00 | 0.00 |
| ATOM | 5346 | O    | GLY | 352 | 53.773 | 65.133 | 79.741 | 0.00 | 0.00 |
| ATOM | 5347 | N    | VAL | 353 | 54.950 | 66.942 | 80.446 | 0.00 | 0.00 |
| ATOM | 5348 | H    | VAL | 353 | 55.899 | 67.264 | 80.571 | 0.00 | 0.00 |
| ATOM | 5349 | CA   | VAL | 353 | 53.957 | 67.948 | 80.026 | 0.00 | 0.00 |
| ATOM | 5350 | HA   | VAL | 353 | 52.963 | 67.513 | 79.921 | 0.00 | 0.00 |
| ATOM | 5351 | CB   | VAL | 353 | 53.951 | 69.102 | 81.074 | 0.00 | 0.00 |
| ATOM | 5352 | HB   | VAL | 353 | 54.966 | 69.402 | 81.336 | 0.00 | 0.00 |
| ATOM | 5353 | CG1  | VAL | 353 | 53.336 | 70.361 | 80.519 | 0.00 | 0.00 |
| ATOM | 5354 | 1HG1 | VAL | 353 | 52.377 | 70.270 | 80.009 | 0.00 | 0.00 |
| ATOM | 5355 | 2HG1 | VAL | 353 | 53.103 | 71.005 | 81.367 | 0.00 | 0.00 |

|      |      |      |     |     |        |        |        |      |      |
|------|------|------|-----|-----|--------|--------|--------|------|------|
| ATOM | 5356 | 3HG1 | VAL | 353 | 54.059 | 70.892 | 79.901 | 0.00 | 0.00 |
| ATOM | 5357 | CG2  | VAL | 353 | 53.191 | 68.719 | 82.371 | 0.00 | 0.00 |
| ATOM | 5358 | 1HG2 | VAL | 353 | 53.750 | 67.855 | 82.731 | 0.00 | 0.00 |
| ATOM | 5359 | 2HG2 | VAL | 353 | 53.243 | 69.509 | 83.119 | 0.00 | 0.00 |
| ATOM | 5360 | 3HG2 | VAL | 353 | 52.155 | 68.520 | 82.093 | 0.00 | 0.00 |
| ATOM | 5361 | C    | VAL | 353 | 54.368 | 68.397 | 78.640 | 0.00 | 0.00 |
| ATOM | 5362 | O    | VAL | 353 | 55.421 | 69.008 | 78.437 | 0.00 | 0.00 |
| ATOM | 5363 | N    | THR | 354 | 53.694 | 67.962 | 77.529 | 0.00 | 0.00 |
| ATOM | 5364 | H    | THR | 354 | 52.791 | 67.527 | 77.656 | 0.00 | 0.00 |
| ATOM | 5365 | CA   | THR | 354 | 53.878 | 68.521 | 76.224 | 0.00 | 0.00 |
| ATOM | 5366 | HA   | THR | 354 | 54.923 | 68.779 | 76.057 | 0.00 | 0.00 |
| ATOM | 5367 | CB   | THR | 354 | 53.334 | 67.602 | 75.195 | 0.00 | 0.00 |
| ATOM | 5368 | HB   | THR | 354 | 53.497 | 68.022 | 74.203 | 0.00 | 0.00 |
| ATOM | 5369 | CG2  | THR | 354 | 54.050 | 66.244 | 75.159 | 0.00 | 0.00 |
| ATOM | 5370 | 1HG2 | THR | 354 | 53.519 | 65.793 | 74.321 | 0.00 | 0.00 |
| ATOM | 5371 | 2HG2 | THR | 354 | 55.101 | 66.262 | 74.871 | 0.00 | 0.00 |
| ATOM | 5372 | 3HG2 | THR | 354 | 53.828 | 65.683 | 76.066 | 0.00 | 0.00 |
| ATOM | 5373 | OG1  | THR | 354 | 51.972 | 67.377 | 75.511 | 0.00 | 0.00 |
| ATOM | 5374 | HG1  | THR | 354 | 51.525 | 66.987 | 74.756 | 0.00 | 0.00 |
| ATOM | 5375 | C    | THR | 354 | 53.212 | 69.921 | 75.890 | 0.00 | 0.00 |
| ATOM | 5376 | O    | THR | 354 | 53.644 | 70.471 | 74.899 | 0.00 | 0.00 |
| ATOM | 5377 | N    | THR | 355 | 52.416 | 70.485 | 76.788 | 0.00 | 0.00 |
| ATOM | 5378 | H    | THR | 355 | 52.184 | 70.003 | 77.645 | 0.00 | 0.00 |
| ATOM | 5379 | CA   | THR | 355 | 51.502 | 71.562 | 76.473 | 0.00 | 0.00 |
| ATOM | 5380 | HA   | THR | 355 | 51.795 | 72.058 | 75.548 | 0.00 | 0.00 |
| ATOM | 5381 | CB   | THR | 355 | 50.123 | 70.943 | 76.393 | 0.00 | 0.00 |

|      |      |      |     |     |        |        |        |      |      |
|------|------|------|-----|-----|--------|--------|--------|------|------|
| ATOM | 5382 | HB   | THR | 355 | 50.027 | 70.473 | 77.372 | 0.00 | 0.00 |
| ATOM | 5383 | CG2  | THR | 355 | 48.986 | 71.872 | 76.210 | 0.00 | 0.00 |
| ATOM | 5384 | 1HG2 | THR | 355 | 49.080 | 72.802 | 76.772 | 0.00 | 0.00 |
| ATOM | 5385 | 2HG2 | THR | 355 | 49.037 | 72.131 | 75.153 | 0.00 | 0.00 |
| ATOM | 5386 | 3HG2 | THR | 355 | 48.060 | 71.404 | 76.544 | 0.00 | 0.00 |
| ATOM | 5387 | OG1  | THR | 355 | 50.036 | 69.970 | 75.351 | 0.00 | 0.00 |
| ATOM | 5388 | HG1  | THR | 355 | 50.388 | 69.143 | 75.690 | 0.00 | 0.00 |
| ATOM | 5389 | C    | THR | 355 | 51.591 | 72.536 | 77.650 | 0.00 | 0.00 |
| ATOM | 5390 | O    | THR | 355 | 51.390 | 72.193 | 78.808 | 0.00 | 0.00 |
| ATOM | 5391 | N    | MET | 356 | 51.978 | 73.768 | 77.424 | 0.00 | 0.00 |
| ATOM | 5392 | H    | MET | 356 | 52.254 | 73.992 | 76.479 | 0.00 | 0.00 |
| ATOM | 5393 | CA   | MET | 356 | 52.335 | 74.706 | 78.486 | 0.00 | 0.00 |
| ATOM | 5394 | HA   | MET | 356 | 52.062 | 74.298 | 79.459 | 0.00 | 0.00 |
| ATOM | 5395 | CB   | MET | 356 | 53.833 | 75.062 | 78.419 | 0.00 | 0.00 |
| ATOM | 5396 | HB2  | MET | 356 | 54.176 | 75.369 | 77.431 | 0.00 | 0.00 |
| ATOM | 5397 | HB3  | MET | 356 | 53.957 | 75.939 | 79.053 | 0.00 | 0.00 |
| ATOM | 5398 | CG   | MET | 356 | 54.757 | 73.909 | 78.907 | 0.00 | 0.00 |
| ATOM | 5399 | HG2  | MET | 356 | 54.241 | 73.346 | 79.684 | 0.00 | 0.00 |
| ATOM | 5400 | HG3  | MET | 356 | 54.939 | 73.251 | 78.057 | 0.00 | 0.00 |
| ATOM | 5401 | SD   | MET | 356 | 56.332 | 74.274 | 79.614 | 0.00 | 0.00 |
| ATOM | 5402 | CE   | MET | 356 | 56.841 | 72.682 | 80.211 | 0.00 | 0.00 |
| ATOM | 5403 | HE1  | MET | 356 | 56.131 | 72.270 | 80.928 | 0.00 | 0.00 |
| ATOM | 5404 | HE2  | MET | 356 | 57.225 | 72.001 | 79.451 | 0.00 | 0.00 |
| ATOM | 5405 | HE3  | MET | 356 | 57.739 | 72.749 | 80.824 | 0.00 | 0.00 |
| ATOM | 5406 | C    | MET | 356 | 51.441 | 75.991 | 78.358 | 0.00 | 0.00 |
| ATOM | 5407 | O    | MET | 356 | 51.532 | 76.716 | 77.385 | 0.00 | 0.00 |

|      |      |      |     |     |        |        |        |      |      |
|------|------|------|-----|-----|--------|--------|--------|------|------|
| ATOM | 5408 | N    | VAL | 357 | 50.568 | 76.217 | 79.323 | 0.00 | 0.00 |
| ATOM | 5409 | H    | VAL | 357 | 50.541 | 75.583 | 80.109 | 0.00 | 0.00 |
| ATOM | 5410 | CA   | VAL | 357 | 49.785 | 77.406 | 79.580 | 0.00 | 0.00 |
| ATOM | 5411 | HA   | VAL | 357 | 49.818 | 78.024 | 78.682 | 0.00 | 0.00 |
| ATOM | 5412 | CB   | VAL | 357 | 48.295 | 77.135 | 79.839 | 0.00 | 0.00 |
| ATOM | 5413 | HB   | VAL | 357 | 48.107 | 76.432 | 80.651 | 0.00 | 0.00 |
| ATOM | 5414 | CG1  | VAL | 357 | 47.570 | 78.462 | 80.264 | 0.00 | 0.00 |
| ATOM | 5415 | 1HG1 | VAL | 357 | 47.824 | 78.853 | 81.249 | 0.00 | 0.00 |
| ATOM | 5416 | 2HG1 | VAL | 357 | 47.673 | 79.215 | 79.483 | 0.00 | 0.00 |
| ATOM | 5417 | 3HG1 | VAL | 357 | 46.515 | 78.214 | 80.383 | 0.00 | 0.00 |
| ATOM | 5418 | CG2  | VAL | 357 | 47.560 | 76.649 | 78.620 | 0.00 | 0.00 |
| ATOM | 5419 | 1HG2 | VAL | 357 | 48.051 | 75.750 | 78.247 | 0.00 | 0.00 |
| ATOM | 5420 | 2HG2 | VAL | 357 | 46.535 | 76.308 | 78.773 | 0.00 | 0.00 |
| ATOM | 5421 | 3HG2 | VAL | 357 | 47.506 | 77.378 | 77.811 | 0.00 | 0.00 |
| ATOM | 5422 | C    | VAL | 357 | 50.490 | 78.164 | 80.724 | 0.00 | 0.00 |
| ATOM | 5423 | O    | VAL | 357 | 50.821 | 77.523 | 81.758 | 0.00 | 0.00 |
| ATOM | 5424 | N    | GLY | 358 | 50.883 | 79.471 | 80.459 | 0.00 | 0.00 |
| ATOM | 5425 | H    | GLY | 358 | 50.598 | 80.002 | 79.649 | 0.00 | 0.00 |
| ATOM | 5426 | CA   | GLY | 358 | 51.973 | 80.052 | 81.221 | 0.00 | 0.00 |
| ATOM | 5427 | HA2  | GLY | 358 | 51.939 | 79.746 | 82.266 | 0.00 | 0.00 |
| ATOM | 5428 | HA3  | GLY | 358 | 52.915 | 79.565 | 80.971 | 0.00 | 0.00 |
| ATOM | 5429 | C    | GLY | 358 | 52.153 | 81.554 | 81.015 | 0.00 | 0.00 |
| ATOM | 5430 | O    | GLY | 358 | 51.360 | 82.127 | 80.306 | 0.00 | 0.00 |
| ATOM | 5431 | N    | GLY | 359 | 53.093 | 82.218 | 81.685 | 0.00 | 0.00 |
| ATOM | 5432 | H    | GLY | 359 | 53.733 | 81.691 | 82.262 | 0.00 | 0.00 |
| ATOM | 5433 | CA   | GLY | 359 | 53.432 | 83.605 | 81.536 | 0.00 | 0.00 |

|      |      |      |     |     |        |        |        |      |      |
|------|------|------|-----|-----|--------|--------|--------|------|------|
| ATOM | 5434 | HA2  | GLY | 359 | 52.574 | 84.088 | 82.003 | 0.00 | 0.00 |
| ATOM | 5435 | HA3  | GLY | 359 | 53.522 | 83.941 | 80.503 | 0.00 | 0.00 |
| ATOM | 5436 | C    | GLY | 359 | 54.662 | 83.970 | 82.268 | 0.00 | 0.00 |
| ATOM | 5437 | O    | GLY | 359 | 55.313 | 83.179 | 82.998 | 0.00 | 0.00 |
| ATOM | 5438 | N    | GLY | 360 | 55.144 | 85.176 | 81.837 | 0.00 | 0.00 |
| ATOM | 5439 | H    | GLY | 360 | 54.579 | 85.633 | 81.135 | 0.00 | 0.00 |
| ATOM | 5440 | CA   | GLY | 360 | 56.396 | 85.755 | 82.140 | 0.00 | 0.00 |
| ATOM | 5441 | HA2  | GLY | 360 | 56.221 | 86.600 | 82.807 | 0.00 | 0.00 |
| ATOM | 5442 | HA3  | GLY | 360 | 56.991 | 85.086 | 82.762 | 0.00 | 0.00 |
| ATOM | 5443 | C    | GLY | 360 | 57.266 | 86.213 | 81.006 | 0.00 | 0.00 |
| ATOM | 5444 | O    | GLY | 360 | 56.991 | 86.022 | 79.811 | 0.00 | 0.00 |
| ATOM | 5445 | N    | THR | 361 | 58.341 | 86.836 | 81.435 | 0.00 | 0.00 |
| ATOM | 5446 | H    | THR | 361 | 58.356 | 86.909 | 82.442 | 0.00 | 0.00 |
| ATOM | 5447 | CA   | THR | 361 | 59.380 | 87.539 | 80.598 | 0.00 | 0.00 |
| ATOM | 5448 | HA   | THR | 361 | 58.973 | 87.542 | 79.587 | 0.00 | 0.00 |
| ATOM | 5449 | CB   | THR | 361 | 59.534 | 89.060 | 81.058 | 0.00 | 0.00 |
| ATOM | 5450 | HB   | THR | 361 | 60.218 | 89.471 | 80.315 | 0.00 | 0.00 |
| ATOM | 5451 | CG2  | THR | 361 | 58.202 | 89.858 | 80.996 | 0.00 | 0.00 |
| ATOM | 5452 | 1HG2 | THR | 361 | 57.543 | 89.776 | 81.860 | 0.00 | 0.00 |
| ATOM | 5453 | 2HG2 | THR | 361 | 58.355 | 90.924 | 80.827 | 0.00 | 0.00 |
| ATOM | 5454 | 3HG2 | THR | 361 | 57.655 | 89.491 | 80.127 | 0.00 | 0.00 |
| ATOM | 5455 | OG1  | THR | 361 | 60.117 | 89.229 | 82.316 | 0.00 | 0.00 |
| ATOM | 5456 | HG1  | THR | 361 | 59.485 | 89.493 | 82.988 | 0.00 | 0.00 |
| ATOM | 5457 | C    | THR | 361 | 60.861 | 86.959 | 80.583 | 0.00 | 0.00 |
| ATOM | 5458 | O    | THR | 361 | 61.675 | 87.204 | 79.665 | 0.00 | 0.00 |
| ATOM | 5459 | N    | GLY | 362 | 61.232 | 86.283 | 81.648 | 0.00 | 0.00 |

|      |      |     |     |     |        |        |        |      |      |
|------|------|-----|-----|-----|--------|--------|--------|------|------|
| ATOM | 5460 | H   | GLY | 362 | 60.499 | 86.004 | 82.285 | 0.00 | 0.00 |
| ATOM | 5461 | CA  | GLY | 362 | 62.594 | 85.799 | 81.874 | 0.00 | 0.00 |
| ATOM | 5462 | HA2 | GLY | 362 | 62.497 | 84.716 | 81.812 | 0.00 | 0.00 |
| ATOM | 5463 | HA3 | GLY | 362 | 63.276 | 86.241 | 81.147 | 0.00 | 0.00 |
| ATOM | 5464 | C   | GLY | 362 | 62.982 | 86.081 | 83.361 | 0.00 | 0.00 |
| ATOM | 5465 | O   | GLY | 362 | 62.094 | 86.297 | 84.236 | 0.00 | 0.00 |
| ATOM | 5466 | N   | PRO | 363 | 64.282 | 86.237 | 83.637 | 0.00 | 0.00 |
| ATOM | 5467 | CD  | PRO | 363 | 65.350 | 85.793 | 82.815 | 0.00 | 0.00 |
| ATOM | 5468 | HD2 | PRO | 363 | 65.087 | 84.972 | 82.148 | 0.00 | 0.00 |
| ATOM | 5469 | HD3 | PRO | 363 | 65.754 | 86.681 | 82.330 | 0.00 | 0.00 |
| ATOM | 5470 | CG  | PRO | 363 | 66.352 | 85.384 | 83.781 | 0.00 | 0.00 |
| ATOM | 5471 | HG2 | PRO | 363 | 66.155 | 84.366 | 84.118 | 0.00 | 0.00 |
| ATOM | 5472 | HG3 | PRO | 363 | 67.258 | 85.455 | 83.179 | 0.00 | 0.00 |
| ATOM | 5473 | CB  | PRO | 363 | 66.270 | 86.534 | 84.798 | 0.00 | 0.00 |
| ATOM | 5474 | HB2 | PRO | 363 | 66.752 | 86.225 | 85.726 | 0.00 | 0.00 |
| ATOM | 5475 | HB3 | PRO | 363 | 66.636 | 87.432 | 84.301 | 0.00 | 0.00 |
| ATOM | 5476 | CA  | PRO | 363 | 64.797 | 86.690 | 84.933 | 0.00 | 0.00 |
| ATOM | 5477 | HA  | PRO | 363 | 64.314 | 86.007 | 85.633 | 0.00 | 0.00 |
| ATOM | 5478 | C   | PRO | 363 | 64.438 | 88.124 | 85.432 | 0.00 | 0.00 |
| ATOM | 5479 | O   | PRO | 363 | 65.313 | 88.935 | 85.529 | 0.00 | 0.00 |
| ATOM | 5480 | N   | ALA | 364 | 63.191 | 88.451 | 85.810 | 0.00 | 0.00 |
| ATOM | 5481 | H   | ALA | 364 | 62.475 | 87.789 | 85.546 | 0.00 | 0.00 |
| ATOM | 5482 | CA  | ALA | 364 | 62.818 | 89.762 | 86.277 | 0.00 | 0.00 |
| ATOM | 5483 | HA  | ALA | 364 | 63.654 | 90.433 | 86.473 | 0.00 | 0.00 |
| ATOM | 5484 | CB  | ALA | 364 | 61.998 | 90.398 | 85.210 | 0.00 | 0.00 |
| ATOM | 5485 | HB1 | ALA | 364 | 62.527 | 90.331 | 84.260 | 0.00 | 0.00 |

|      |      |     |     |     |        |        |        |      |      |
|------|------|-----|-----|-----|--------|--------|--------|------|------|
| ATOM | 5486 | HB2 | ALA | 364 | 61.155 | 89.729 | 85.041 | 0.00 | 0.00 |
| ATOM | 5487 | HB3 | ALA | 364 | 61.833 | 91.461 | 85.391 | 0.00 | 0.00 |
| ATOM | 5488 | C   | ALA | 364 | 62.040 | 89.519 | 87.570 | 0.00 | 0.00 |
| ATOM | 5489 | O   | ALA | 364 | 61.396 | 88.551 | 87.735 | 0.00 | 0.00 |
| ATOM | 5490 | N   | ALA | 365 | 62.131 | 90.540 | 88.423 | 0.00 | 0.00 |
| ATOM | 5491 | H   | ALA | 365 | 62.476 | 91.463 | 88.202 | 0.00 | 0.00 |
| ATOM | 5492 | CA  | ALA | 365 | 61.473 | 90.515 | 89.704 | 0.00 | 0.00 |
| ATOM | 5493 | HA  | ALA | 365 | 62.037 | 89.843 | 90.351 | 0.00 | 0.00 |
| ATOM | 5494 | CB  | ALA | 365 | 61.700 | 91.831 | 90.404 | 0.00 | 0.00 |
| ATOM | 5495 | HB1 | ALA | 365 | 61.208 | 92.683 | 89.936 | 0.00 | 0.00 |
| ATOM | 5496 | HB2 | ALA | 365 | 61.437 | 91.709 | 91.454 | 0.00 | 0.00 |
| ATOM | 5497 | HB3 | ALA | 365 | 62.762 | 92.075 | 90.399 | 0.00 | 0.00 |
| ATOM | 5498 | C   | ALA | 365 | 59.997 | 90.108 | 89.593 | 0.00 | 0.00 |
| ATOM | 5499 | O   | ALA | 365 | 59.559 | 89.295 | 90.382 | 0.00 | 0.00 |
| ATOM | 5500 | N   | GLY | 366 | 59.298 | 90.640 | 88.584 | 0.00 | 0.00 |
| ATOM | 5501 | H   | GLY | 366 | 59.823 | 91.314 | 88.045 | 0.00 | 0.00 |
| ATOM | 5502 | CA  | GLY | 366 | 57.842 | 90.316 | 88.334 | 0.00 | 0.00 |
| ATOM | 5503 | HA2 | GLY | 366 | 57.246 | 90.268 | 89.246 | 0.00 | 0.00 |
| ATOM | 5504 | HA3 | GLY | 366 | 57.364 | 91.025 | 87.657 | 0.00 | 0.00 |
| ATOM | 5505 | C   | GLY | 366 | 57.602 | 88.901 | 87.813 | 0.00 | 0.00 |
| ATOM | 5506 | O   | GLY | 366 | 56.834 | 88.186 | 88.426 | 0.00 | 0.00 |
| ATOM | 5507 | N   | THR | 367 | 58.432 | 88.313 | 86.952 | 0.00 | 0.00 |
| ATOM | 5508 | H   | THR | 367 | 59.094 | 88.895 | 86.458 | 0.00 | 0.00 |
| ATOM | 5509 | CA  | THR | 367 | 58.383 | 86.876 | 86.577 | 0.00 | 0.00 |
| ATOM | 5510 | HA  | THR | 367 | 57.348 | 86.577 | 86.411 | 0.00 | 0.00 |
| ATOM | 5511 | CB  | THR | 367 | 59.146 | 86.750 | 85.196 | 0.00 | 0.00 |

|      |      |      |     |     |        |        |        |      |      |
|------|------|------|-----|-----|--------|--------|--------|------|------|
| ATOM | 5512 | HB   | THR | 367 | 60.148 | 87.167 | 85.285 | 0.00 | 0.00 |
| ATOM | 5513 | CG2  | THR | 367 | 59.185 | 85.352 | 84.548 | 0.00 | 0.00 |
| ATOM | 5514 | 1HG2 | THR | 367 | 58.223 | 84.844 | 84.623 | 0.00 | 0.00 |
| ATOM | 5515 | 2HG2 | THR | 367 | 59.590 | 85.492 | 83.546 | 0.00 | 0.00 |
| ATOM | 5516 | 3HG2 | THR | 367 | 59.864 | 84.776 | 85.176 | 0.00 | 0.00 |
| ATOM | 5517 | OG1  | THR | 367 | 58.551 | 87.560 | 84.238 | 0.00 | 0.00 |
| ATOM | 5518 | HG1  | THR | 367 | 58.669 | 88.469 | 84.525 | 0.00 | 0.00 |
| ATOM | 5519 | C    | THR | 367 | 58.886 | 85.890 | 87.598 | 0.00 | 0.00 |
| ATOM | 5520 | O    | THR | 367 | 58.303 | 84.861 | 87.800 | 0.00 | 0.00 |
| ATOM | 5521 | N    | HIE | 368 | 59.845 | 86.317 | 88.475 | 0.00 | 0.00 |
| ATOM | 5522 | H    | HIE | 368 | 60.196 | 87.238 | 88.253 | 0.00 | 0.00 |
| ATOM | 5523 | CA   | HIE | 368 | 60.270 | 85.587 | 89.704 | 0.00 | 0.00 |
| ATOM | 5524 | HA   | HIE | 368 | 60.650 | 84.613 | 89.395 | 0.00 | 0.00 |
| ATOM | 5525 | CB   | HIE | 368 | 61.465 | 86.287 | 90.367 | 0.00 | 0.00 |
| ATOM | 5526 | HB2  | HIE | 368 | 61.254 | 87.309 | 90.683 | 0.00 | 0.00 |
| ATOM | 5527 | HB3  | HIE | 368 | 61.663 | 85.870 | 91.354 | 0.00 | 0.00 |
| ATOM | 5528 | CG   | HIE | 368 | 62.740 | 86.194 | 89.601 | 0.00 | 0.00 |
| ATOM | 5529 | ND1  | HIE | 368 | 63.958 | 86.890 | 89.900 | 0.00 | 0.00 |
| ATOM | 5530 | CE1  | HIE | 368 | 64.857 | 86.472 | 88.945 | 0.00 | 0.00 |
| ATOM | 5531 | HE1  | HIE | 368 | 65.914 | 86.689 | 88.941 | 0.00 | 0.00 |
| ATOM | 5532 | NE2  | HIE | 368 | 64.224 | 85.642 | 88.100 | 0.00 | 0.00 |
| ATOM | 5533 | HE2  | HIE | 368 | 64.687 | 85.108 | 87.379 | 0.00 | 0.00 |
| ATOM | 5534 | CD2  | HIE | 368 | 62.940 | 85.469 | 88.502 | 0.00 | 0.00 |
| ATOM | 5535 | HD2  | HIE | 368 | 62.225 | 84.834 | 88.001 | 0.00 | 0.00 |
| ATOM | 5536 | C    | HIE | 368 | 59.178 | 85.430 | 90.857 | 0.00 | 0.00 |
| ATOM | 5537 | O    | HIE | 368 | 59.200 | 84.451 | 91.559 | 0.00 | 0.00 |



|      |      |      |     |     |        |        |        |      |      |
|------|------|------|-----|-----|--------|--------|--------|------|------|
| ATOM | 5538 | N    | ALA | 369 | 58.261 | 86.365 | 90.889 | 0.00 | 0.00 |
| ATOM | 5539 | H    | ALA | 369 | 58.342 | 87.198 | 90.323 | 0.00 | 0.00 |
| ATOM | 5540 | CA   | ALA | 369 | 57.080 | 86.341 | 91.780 | 0.00 | 0.00 |
| ATOM | 5541 | HA   | ALA | 369 | 57.240 | 85.725 | 92.664 | 0.00 | 0.00 |
| ATOM | 5542 | CB   | ALA | 369 | 56.923 | 87.754 | 92.202 | 0.00 | 0.00 |
| ATOM | 5543 | HB1  | ALA | 369 | 57.874 | 88.174 | 92.528 | 0.00 | 0.00 |
| ATOM | 5544 | HB2  | ALA | 369 | 56.139 | 87.822 | 92.955 | 0.00 | 0.00 |
| ATOM | 5545 | HB3  | ALA | 369 | 56.679 | 88.317 | 91.301 | 0.00 | 0.00 |
| ATOM | 5546 | C    | ALA | 369 | 55.823 | 85.834 | 91.075 | 0.00 | 0.00 |
| ATOM | 5547 | O    | ALA | 369 | 54.985 | 85.117 | 91.686 | 0.00 | 0.00 |
| ATOM | 5548 | N    | THR | 370 | 55.619 | 86.177 | 89.794 | 0.00 | 0.00 |
| ATOM | 5549 | H    | THR | 370 | 56.368 | 86.731 | 89.404 | 0.00 | 0.00 |
| ATOM | 5550 | CA   | THR | 370 | 54.281 | 86.188 | 89.128 | 0.00 | 0.00 |
| ATOM | 5551 | HA   | THR | 370 | 53.663 | 85.515 | 89.722 | 0.00 | 0.00 |
| ATOM | 5552 | CB   | THR | 370 | 53.564 | 87.543 | 89.026 | 0.00 | 0.00 |
| ATOM | 5553 | HB   | THR | 370 | 52.498 | 87.371 | 88.874 | 0.00 | 0.00 |
| ATOM | 5554 | CG2  | THR | 370 | 53.855 | 88.533 | 90.170 | 0.00 | 0.00 |
| ATOM | 5555 | 1HG2 | THR | 370 | 54.841 | 88.987 | 90.067 | 0.00 | 0.00 |
| ATOM | 5556 | 2HG2 | THR | 370 | 53.055 | 89.271 | 90.108 | 0.00 | 0.00 |
| ATOM | 5557 | 3HG2 | THR | 370 | 53.796 | 87.995 | 91.115 | 0.00 | 0.00 |
| ATOM | 5558 | OG1  | THR | 370 | 53.994 | 88.074 | 87.753 | 0.00 | 0.00 |
| ATOM | 5559 | HG1  | THR | 370 | 54.952 | 88.013 | 87.765 | 0.00 | 0.00 |
| ATOM | 5560 | C    | THR | 370 | 54.304 | 85.410 | 87.772 | 0.00 | 0.00 |
| ATOM | 5561 | O    | THR | 370 | 55.285 | 85.448 | 87.090 | 0.00 | 0.00 |
| ATOM | 5562 | N    | THR | 371 | 53.185 | 84.849 | 87.377 | 0.00 | 0.00 |
| ATOM | 5563 | H    | THR | 371 | 52.472 | 84.668 | 88.069 | 0.00 | 0.00 |

|      |      |      |     |     |        |        |        |      |      |
|------|------|------|-----|-----|--------|--------|--------|------|------|
| ATOM | 5564 | CA   | THR | 371 | 52.921 | 84.500 | 86.015 | 0.00 | 0.00 |
| ATOM | 5565 | HA   | THR | 371 | 53.794 | 84.098 | 85.501 | 0.00 | 0.00 |
| ATOM | 5566 | CB   | THR | 371 | 51.922 | 83.278 | 85.945 | 0.00 | 0.00 |
| ATOM | 5567 | HB   | THR | 371 | 50.896 | 83.572 | 85.725 | 0.00 | 0.00 |
| ATOM | 5568 | CG2  | THR | 371 | 52.197 | 82.133 | 84.977 | 0.00 | 0.00 |
| ATOM | 5569 | 1HG2 | THR | 371 | 51.430 | 81.362 | 85.046 | 0.00 | 0.00 |
| ATOM | 5570 | 2HG2 | THR | 371 | 52.087 | 82.609 | 84.002 | 0.00 | 0.00 |
| ATOM | 5571 | 3HG2 | THR | 371 | 53.176 | 81.676 | 85.126 | 0.00 | 0.00 |
| ATOM | 5572 | OG1  | THR | 371 | 51.885 | 82.655 | 87.202 | 0.00 | 0.00 |
| ATOM | 5573 | HG1  | THR | 371 | 52.765 | 82.334 | 87.412 | 0.00 | 0.00 |
| ATOM | 5574 | C    | THR | 371 | 52.415 | 85.672 | 85.105 | 0.00 | 0.00 |
| ATOM | 5575 | O    | THR | 371 | 51.841 | 85.329 | 84.086 | 0.00 | 0.00 |
| ATOM | 5576 | N    | CYS | 372 | 52.418 | 86.920 | 85.597 | 0.00 | 0.00 |
| ATOM | 5577 | H    | CYS | 372 | 52.940 | 87.145 | 86.431 | 0.00 | 0.00 |
| ATOM | 5578 | CA   | CYS | 372 | 51.632 | 87.928 | 84.952 | 0.00 | 0.00 |
| ATOM | 5579 | HA   | CYS | 372 | 50.765 | 87.398 | 84.558 | 0.00 | 0.00 |
| ATOM | 5580 | CB   | CYS | 372 | 51.150 | 88.939 | 86.026 | 0.00 | 0.00 |
| ATOM | 5581 | HB2  | CYS | 372 | 52.030 | 89.257 | 86.584 | 0.00 | 0.00 |
| ATOM | 5582 | HB3  | CYS | 372 | 50.661 | 89.710 | 85.430 | 0.00 | 0.00 |
| ATOM | 5583 | SG   | CYS | 372 | 50.098 | 88.121 | 87.213 | 0.00 | 0.00 |
| ATOM | 5584 | HG   | CYS | 372 | 49.328 | 89.202 | 87.367 | 0.00 | 0.00 |
| ATOM | 5585 | C    | CYS | 372 | 52.438 | 88.518 | 83.806 | 0.00 | 0.00 |
| ATOM | 5586 | O    | CYS | 372 | 53.274 | 89.463 | 83.972 | 0.00 | 0.00 |
| ATOM | 5587 | N    | THR | 373 | 52.114 | 88.101 | 82.562 | 0.00 | 0.00 |
| ATOM | 5588 | H    | THR | 373 | 51.305 | 87.506 | 82.455 | 0.00 | 0.00 |
| ATOM | 5589 | CA   | THR | 373 | 52.869 | 88.522 | 81.345 | 0.00 | 0.00 |

|      |      |      |     |     |        |        |        |      |      |
|------|------|------|-----|-----|--------|--------|--------|------|------|
| ATOM | 5590 | HA   | THR | 373 | 53.892 | 88.474 | 81.719 | 0.00 | 0.00 |
| ATOM | 5591 | CB   | THR | 373 | 52.707 | 87.612 | 80.112 | 0.00 | 0.00 |
| ATOM | 5592 | HB   | THR | 373 | 51.698 | 87.826 | 79.761 | 0.00 | 0.00 |
| ATOM | 5593 | CG2  | THR | 373 | 53.765 | 87.924 | 78.967 | 0.00 | 0.00 |
| ATOM | 5594 | 1HG2 | THR | 373 | 53.753 | 87.040 | 78.329 | 0.00 | 0.00 |
| ATOM | 5595 | 2HG2 | THR | 373 | 53.505 | 88.719 | 78.268 | 0.00 | 0.00 |
| ATOM | 5596 | 3HG2 | THR | 373 | 54.804 | 88.138 | 79.215 | 0.00 | 0.00 |
| ATOM | 5597 | OG1  | THR | 373 | 52.862 | 86.272 | 80.472 | 0.00 | 0.00 |
| ATOM | 5598 | HG1  | THR | 373 | 52.015 | 86.150 | 80.905 | 0.00 | 0.00 |
| ATOM | 5599 | C    | THR | 373 | 52.528 | 89.956 | 80.944 | 0.00 | 0.00 |
| ATOM | 5600 | O    | THR | 373 | 51.341 | 90.131 | 80.584 | 0.00 | 0.00 |
| ATOM | 5601 | N    | PRO | 374 | 53.399 | 90.989 | 80.884 | 0.00 | 0.00 |
| ATOM | 5602 | CD   | PRO | 374 | 54.831 | 90.922 | 81.110 | 0.00 | 0.00 |
| ATOM | 5603 | HD2  | PRO | 374 | 55.465 | 90.679 | 80.258 | 0.00 | 0.00 |
| ATOM | 5604 | HD3  | PRO | 374 | 54.900 | 90.267 | 81.979 | 0.00 | 0.00 |
| ATOM | 5605 | CG   | PRO | 374 | 55.242 | 92.268 | 81.643 | 0.00 | 0.00 |
| ATOM | 5606 | HG2  | PRO | 374 | 55.729 | 92.194 | 82.615 | 0.00 | 0.00 |
| ATOM | 5607 | HG3  | PRO | 374 | 55.827 | 92.785 | 80.882 | 0.00 | 0.00 |
| ATOM | 5608 | CB   | PRO | 374 | 53.953 | 93.033 | 81.775 | 0.00 | 0.00 |
| ATOM | 5609 | HB2  | PRO | 374 | 53.557 | 93.042 | 82.790 | 0.00 | 0.00 |
| ATOM | 5610 | HB3  | PRO | 374 | 54.016 | 94.081 | 81.483 | 0.00 | 0.00 |
| ATOM | 5611 | CA   | PRO | 374 | 52.982 | 92.387 | 80.873 | 0.00 | 0.00 |
| ATOM | 5612 | HA   | PRO | 374 | 51.965 | 92.507 | 81.243 | 0.00 | 0.00 |
| ATOM | 5613 | C    | PRO | 374 | 52.992 | 92.983 | 79.541 | 0.00 | 0.00 |
| ATOM | 5614 | O    | PRO | 374 | 53.953 | 93.092 | 78.826 | 0.00 | 0.00 |
| ATOM | 5615 | N    | GLY | 375 | 51.814 | 93.471 | 79.132 | 0.00 | 0.00 |

|      |      |     |     |     |        |        |        |      |      |
|------|------|-----|-----|-----|--------|--------|--------|------|------|
| ATOM | 5616 | H   | GLY | 375 | 51.005 | 93.365 | 79.727 | 0.00 | 0.00 |
| ATOM | 5617 | CA  | GLY | 375 | 51.657 | 94.376 | 77.994 | 0.00 | 0.00 |
| ATOM | 5618 | HA2 | GLY | 375 | 50.740 | 94.951 | 78.122 | 0.00 | 0.00 |
| ATOM | 5619 | HA3 | GLY | 375 | 52.472 | 95.071 | 78.193 | 0.00 | 0.00 |
| ATOM | 5620 | C   | GLY | 375 | 51.909 | 93.816 | 76.590 | 0.00 | 0.00 |
| ATOM | 5621 | O   | GLY | 375 | 52.519 | 92.770 | 76.461 | 0.00 | 0.00 |
| ATOM | 5622 | N   | PRO | 376 | 51.295 | 94.438 | 75.568 | 0.00 | 0.00 |
| ATOM | 5623 | CD  | PRO | 376 | 50.436 | 95.631 | 75.681 | 0.00 | 0.00 |
| ATOM | 5624 | HD2 | PRO | 376 | 49.568 | 95.548 | 76.335 | 0.00 | 0.00 |
| ATOM | 5625 | HD3 | PRO | 376 | 51.042 | 96.486 | 75.982 | 0.00 | 0.00 |
| ATOM | 5626 | CG  | PRO | 376 | 50.010 | 95.934 | 74.272 | 0.00 | 0.00 |
| ATOM | 5627 | HG2 | PRO | 376 | 48.995 | 95.646 | 73.996 | 0.00 | 0.00 |
| ATOM | 5628 | HG3 | PRO | 376 | 50.125 | 97.002 | 74.086 | 0.00 | 0.00 |
| ATOM | 5629 | CB  | PRO | 376 | 51.139 | 95.307 | 73.394 | 0.00 | 0.00 |
| ATOM | 5630 | HB2 | PRO | 376 | 50.807 | 95.045 | 72.389 | 0.00 | 0.00 |
| ATOM | 5631 | HB3 | PRO | 376 | 51.927 | 96.003 | 73.106 | 0.00 | 0.00 |
| ATOM | 5632 | CA  | PRO | 376 | 51.564 | 94.106 | 74.189 | 0.00 | 0.00 |
| ATOM | 5633 | HA  | PRO | 376 | 50.875 | 93.276 | 74.036 | 0.00 | 0.00 |
| ATOM | 5634 | C   | PRO | 376 | 53.014 | 93.709 | 73.782 | 0.00 | 0.00 |
| ATOM | 5635 | O   | PRO | 376 | 53.265 | 92.639 | 73.198 | 0.00 | 0.00 |
| ATOM | 5636 | N   | TRP | 377 | 54.013 | 94.547 | 74.146 | 0.00 | 0.00 |
| ATOM | 5637 | H   | TRP | 377 | 53.752 | 95.403 | 74.614 | 0.00 | 0.00 |
| ATOM | 5638 | CA  | TRP | 377 | 55.432 | 94.377 | 73.741 | 0.00 | 0.00 |
| ATOM | 5639 | HA  | TRP | 377 | 55.512 | 94.145 | 72.679 | 0.00 | 0.00 |
| ATOM | 5640 | CB  | TRP | 377 | 56.240 | 95.633 | 74.249 | 0.00 | 0.00 |
| ATOM | 5641 | HB2 | TRP | 377 | 55.669 | 96.561 | 74.230 | 0.00 | 0.00 |

|      |      |     |     |     |        |        |        |      |      |
|------|------|-----|-----|-----|--------|--------|--------|------|------|
| ATOM | 5642 | HB3 | TRP | 377 | 56.596 | 95.386 | 75.249 | 0.00 | 0.00 |
| ATOM | 5643 | CG  | TRP | 377 | 57.490 | 95.942 | 73.461 | 0.00 | 0.00 |
| ATOM | 5644 | CD1 | TRP | 377 | 57.583 | 96.617 | 72.268 | 0.00 | 0.00 |
| ATOM | 5645 | HD1 | TRP | 377 | 56.732 | 97.023 | 71.741 | 0.00 | 0.00 |
| ATOM | 5646 | NE1 | TRP | 377 | 58.844 | 96.464 | 71.740 | 0.00 | 0.00 |
| ATOM | 5647 | HE1 | TRP | 377 | 59.127 | 96.908 | 70.879 | 0.00 | 0.00 |
| ATOM | 5648 | CE2 | TRP | 377 | 59.642 | 95.632 | 72.504 | 0.00 | 0.00 |
| ATOM | 5649 | CZ2 | TRP | 377 | 60.918 | 95.091 | 72.286 | 0.00 | 0.00 |
| ATOM | 5650 | HZ2 | TRP | 377 | 61.471 | 95.157 | 71.361 | 0.00 | 0.00 |
| ATOM | 5651 | CH2 | TRP | 377 | 61.486 | 94.326 | 73.323 | 0.00 | 0.00 |
| ATOM | 5652 | HH2 | TRP | 377 | 62.453 | 93.871 | 73.163 | 0.00 | 0.00 |
| ATOM | 5653 | CZ3 | TRP | 377 | 60.728 | 93.916 | 74.370 | 0.00 | 0.00 |
| ATOM | 5654 | HZ3 | TRP | 377 | 61.126 | 93.206 | 75.080 | 0.00 | 0.00 |
| ATOM | 5655 | CE3 | TRP | 377 | 59.451 | 94.417 | 74.559 | 0.00 | 0.00 |
| ATOM | 5656 | HE3 | TRP | 377 | 58.890 | 94.075 | 75.416 | 0.00 | 0.00 |
| ATOM | 5657 | CD2 | TRP | 377 | 58.861 | 95.269 | 73.654 | 0.00 | 0.00 |
| ATOM | 5658 | C   | TRP | 377 | 56.105 | 93.174 | 74.301 | 0.00 | 0.00 |
| ATOM | 5659 | O   | TRP | 377 | 56.689 | 92.358 | 73.566 | 0.00 | 0.00 |
| ATOM | 5660 | N   | TYR | 378 | 55.964 | 92.925 | 75.563 | 0.00 | 0.00 |
| ATOM | 5661 | H   | TYR | 378 | 55.419 | 93.582 | 76.103 | 0.00 | 0.00 |
| ATOM | 5662 | CA  | TYR | 378 | 56.516 | 91.679 | 76.105 | 0.00 | 0.00 |
| ATOM | 5663 | HA  | TYR | 378 | 57.475 | 91.504 | 75.617 | 0.00 | 0.00 |
| ATOM | 5664 | CB  | TYR | 378 | 56.729 | 91.713 | 77.636 | 0.00 | 0.00 |
| ATOM | 5665 | HB2 | TYR | 378 | 56.336 | 92.545 | 78.221 | 0.00 | 0.00 |
| ATOM | 5666 | HB3 | TYR | 378 | 56.295 | 90.852 | 78.144 | 0.00 | 0.00 |
| ATOM | 5667 | CG  | TYR | 378 | 58.220 | 91.649 | 77.995 | 0.00 | 0.00 |

|      |      |      |     |     |        |        |        |      |      |
|------|------|------|-----|-----|--------|--------|--------|------|------|
| ATOM | 5668 | CD1  | TYR | 378 | 59.021 | 92.774 | 78.335 | 0.00 | 0.00 |
| ATOM | 5669 | HD1  | TYR | 378 | 58.522 | 93.719 | 78.491 | 0.00 | 0.00 |
| ATOM | 5670 | CE1  | TYR | 378 | 60.424 | 92.683 | 78.453 | 0.00 | 0.00 |
| ATOM | 5671 | HE1  | TYR | 378 | 60.991 | 93.572 | 78.684 | 0.00 | 0.00 |
| ATOM | 5672 | CZ   | TYR | 378 | 61.005 | 91.446 | 78.296 | 0.00 | 0.00 |
| ATOM | 5673 | OH   | TYR | 378 | 62.316 | 91.435 | 78.428 | 0.00 | 0.00 |
| ATOM | 5674 | HH   | TYR | 378 | 62.777 | 92.265 | 78.286 | 0.00 | 0.00 |
| ATOM | 5675 | CE2  | TYR | 378 | 60.285 | 90.335 | 77.932 | 0.00 | 0.00 |
| ATOM | 5676 | HE2  | TYR | 378 | 60.813 | 89.399 | 77.818 | 0.00 | 0.00 |
| ATOM | 5677 | CD2  | TYR | 378 | 58.871 | 90.470 | 77.695 | 0.00 | 0.00 |
| ATOM | 5678 | HD2  | TYR | 378 | 58.221 | 89.659 | 77.404 | 0.00 | 0.00 |
| ATOM | 5679 | C    | TYR | 378 | 55.692 | 90.382 | 75.751 | 0.00 | 0.00 |
| ATOM | 5680 | O    | TYR | 378 | 56.340 | 89.335 | 75.593 | 0.00 | 0.00 |
| ATOM | 5681 | N    | ILE | 379 | 54.377 | 90.446 | 75.545 | 0.00 | 0.00 |
| ATOM | 5682 | H    | ILE | 379 | 53.964 | 91.320 | 75.837 | 0.00 | 0.00 |
| ATOM | 5683 | CA   | ILE | 379 | 53.596 | 89.347 | 74.930 | 0.00 | 0.00 |
| ATOM | 5684 | HA   | ILE | 379 | 53.521 | 88.427 | 75.509 | 0.00 | 0.00 |
| ATOM | 5685 | CB   | ILE | 379 | 52.142 | 89.882 | 74.778 | 0.00 | 0.00 |
| ATOM | 5686 | HB   | ILE | 379 | 52.123 | 90.937 | 74.504 | 0.00 | 0.00 |
| ATOM | 5687 | CG2  | ILE | 379 | 51.176 | 89.113 | 73.868 | 0.00 | 0.00 |
| ATOM | 5688 | 1HG2 | ILE | 379 | 50.958 | 88.130 | 74.284 | 0.00 | 0.00 |
| ATOM | 5689 | 2HG2 | ILE | 379 | 50.199 | 89.583 | 73.752 | 0.00 | 0.00 |
| ATOM | 5690 | 3HG2 | ILE | 379 | 51.612 | 88.881 | 72.896 | 0.00 | 0.00 |
| ATOM | 5691 | CG1  | ILE | 379 | 51.470 | 89.824 | 76.190 | 0.00 | 0.00 |
| ATOM | 5692 | 2HG1 | ILE | 379 | 51.261 | 88.799 | 76.496 | 0.00 | 0.00 |
| ATOM | 5693 | 3HG1 | ILE | 379 | 52.137 | 90.316 | 76.898 | 0.00 | 0.00 |

|      |      |      |     |     |        |        |        |      |      |
|------|------|------|-----|-----|--------|--------|--------|------|------|
| ATOM | 5694 | CD1  | ILE | 379 | 50.135 | 90.552 | 76.390 | 0.00 | 0.00 |
| ATOM | 5695 | 1HD1 | ILE | 379 | 49.946 | 90.672 | 77.457 | 0.00 | 0.00 |
| ATOM | 5696 | 2HD1 | ILE | 379 | 50.229 | 91.539 | 75.937 | 0.00 | 0.00 |
| ATOM | 5697 | 3HD1 | ILE | 379 | 49.272 | 90.069 | 75.932 | 0.00 | 0.00 |
| ATOM | 5698 | C    | ILE | 379 | 54.237 | 89.018 | 73.564 | 0.00 | 0.00 |
| ATOM | 5699 | O    | ILE | 379 | 54.485 | 87.844 | 73.250 | 0.00 | 0.00 |
| ATOM | 5700 | N    | SER | 380 | 54.396 | 90.033 | 72.705 | 0.00 | 0.00 |
| ATOM | 5701 | H    | SER | 380 | 54.114 | 90.917 | 73.103 | 0.00 | 0.00 |
| ATOM | 5702 | CA   | SER | 380 | 54.752 | 89.895 | 71.289 | 0.00 | 0.00 |
| ATOM | 5703 | HA   | SER | 380 | 54.135 | 89.106 | 70.860 | 0.00 | 0.00 |
| ATOM | 5704 | CB   | SER | 380 | 54.709 | 91.249 | 70.557 | 0.00 | 0.00 |
| ATOM | 5705 | HB2  | SER | 380 | 55.312 | 92.063 | 70.960 | 0.00 | 0.00 |
| ATOM | 5706 | HB3  | SER | 380 | 54.851 | 91.015 | 69.502 | 0.00 | 0.00 |
| ATOM | 5707 | OG   | SER | 380 | 53.393 | 91.712 | 70.719 | 0.00 | 0.00 |
| ATOM | 5708 | HG   | SER | 380 | 53.335 | 92.002 | 71.632 | 0.00 | 0.00 |
| ATOM | 5709 | C    | SER | 380 | 56.118 | 89.224 | 71.175 | 0.00 | 0.00 |
| ATOM | 5710 | O    | SER | 380 | 56.217 | 88.248 | 70.455 | 0.00 | 0.00 |
| ATOM | 5711 | N    | ARG | 381 | 57.179 | 89.668 | 71.891 | 0.00 | 0.00 |
| ATOM | 5712 | H    | ARG | 381 | 57.029 | 90.398 | 72.573 | 0.00 | 0.00 |
| ATOM | 5713 | CA   | ARG | 381 | 58.458 | 88.928 | 71.993 | 0.00 | 0.00 |
| ATOM | 5714 | HA   | ARG | 381 | 58.820 | 88.968 | 70.966 | 0.00 | 0.00 |
| ATOM | 5715 | CB   | ARG | 381 | 59.434 | 89.689 | 72.794 | 0.00 | 0.00 |
| ATOM | 5716 | HB2  | ARG | 381 | 60.232 | 88.956 | 72.919 | 0.00 | 0.00 |
| ATOM | 5717 | HB3  | ARG | 381 | 59.037 | 90.148 | 73.699 | 0.00 | 0.00 |
| ATOM | 5718 | CG   | ARG | 381 | 60.141 | 90.845 | 71.912 | 0.00 | 0.00 |
| ATOM | 5719 | HG2  | ARG | 381 | 60.823 | 91.370 | 72.582 | 0.00 | 0.00 |

|      |      |      |     |     |        |        |        |      |      |
|------|------|------|-----|-----|--------|--------|--------|------|------|
| ATOM | 5720 | HG3  | ARG | 381 | 60.581 | 90.358 | 71.042 | 0.00 | 0.00 |
| ATOM | 5721 | CD   | ARG | 381 | 59.324 | 92.000 | 71.355 | 0.00 | 0.00 |
| ATOM | 5722 | HD2  | ARG | 381 | 58.577 | 92.306 | 72.087 | 0.00 | 0.00 |
| ATOM | 5723 | HD3  | ARG | 381 | 60.018 | 92.837 | 71.267 | 0.00 | 0.00 |
| ATOM | 5724 | NE   | ARG | 381 | 58.550 | 91.813 | 70.151 | 0.00 | 0.00 |
| ATOM | 5725 | HE   | ARG | 381 | 58.871 | 91.093 | 69.519 | 0.00 | 0.00 |
| ATOM | 5726 | CZ   | ARG | 381 | 57.763 | 92.638 | 69.568 | 0.00 | 0.00 |
| ATOM | 5727 | NH1  | ARG | 381 | 57.340 | 92.326 | 68.386 | 0.00 | 0.00 |
| ATOM | 5728 | 1HH1 | ARG | 381 | 57.031 | 93.066 | 67.772 | 0.00 | 0.00 |
| ATOM | 5729 | 2HH1 | ARG | 381 | 57.725 | 91.489 | 67.972 | 0.00 | 0.00 |
| ATOM | 5730 | NH2  | ARG | 381 | 57.364 | 93.706 | 70.152 | 0.00 | 0.00 |
| ATOM | 5731 | 1HH2 | ARG | 381 | 56.644 | 94.275 | 69.730 | 0.00 | 0.00 |
| ATOM | 5732 | 2HH2 | ARG | 381 | 57.848 | 93.963 | 71.000 | 0.00 | 0.00 |
| ATOM | 5733 | C    | ARG | 381 | 58.357 | 87.487 | 72.565 | 0.00 | 0.00 |
| ATOM | 5734 | O    | ARG | 381 | 58.870 | 86.534 | 71.955 | 0.00 | 0.00 |
| ATOM | 5735 | N    | MET | 382 | 57.593 | 87.279 | 73.661 | 0.00 | 0.00 |
| ATOM | 5736 | H    | MET | 382 | 57.214 | 88.076 | 74.151 | 0.00 | 0.00 |
| ATOM | 5737 | CA   | MET | 382 | 57.306 | 85.822 | 74.019 | 0.00 | 0.00 |
| ATOM | 5738 | HA   | MET | 382 | 58.287 | 85.415 | 74.263 | 0.00 | 0.00 |
| ATOM | 5739 | CB   | MET | 382 | 56.566 | 85.734 | 75.338 | 0.00 | 0.00 |
| ATOM | 5740 | HB2  | MET | 382 | 57.097 | 86.442 | 75.974 | 0.00 | 0.00 |
| ATOM | 5741 | HB3  | MET | 382 | 55.545 | 86.062 | 75.141 | 0.00 | 0.00 |
| ATOM | 5742 | CG   | MET | 382 | 56.500 | 84.362 | 75.947 | 0.00 | 0.00 |
| ATOM | 5743 | HG2  | MET | 382 | 56.064 | 84.481 | 76.939 | 0.00 | 0.00 |
| ATOM | 5744 | HG3  | MET | 382 | 55.838 | 83.861 | 75.242 | 0.00 | 0.00 |
| ATOM | 5745 | SD   | MET | 382 | 57.983 | 83.369 | 76.179 | 0.00 | 0.00 |



|      |      |      |     |     |        |        |        |      |      |
|------|------|------|-----|-----|--------|--------|--------|------|------|
| ATOM | 5746 | CE   | MET | 382 | 58.856 | 84.276 | 77.513 | 0.00 | 0.00 |
| ATOM | 5747 | HE1  | MET | 382 | 59.830 | 83.800 | 77.634 | 0.00 | 0.00 |
| ATOM | 5748 | HE2  | MET | 382 | 58.878 | 85.344 | 77.297 | 0.00 | 0.00 |
| ATOM | 5749 | HE3  | MET | 382 | 58.296 | 84.088 | 78.428 | 0.00 | 0.00 |
| ATOM | 5750 | C    | MET | 382 | 56.641 | 84.952 | 72.960 | 0.00 | 0.00 |
| ATOM | 5751 | O    | MET | 382 | 57.041 | 83.861 | 72.706 | 0.00 | 0.00 |
| ATOM | 5752 | N    | LEU | 383 | 55.695 | 85.524 | 72.186 | 0.00 | 0.00 |
| ATOM | 5753 | H    | LEU | 383 | 55.442 | 86.470 | 72.430 | 0.00 | 0.00 |
| ATOM | 5754 | CA   | LEU | 383 | 55.170 | 84.742 | 71.062 | 0.00 | 0.00 |
| ATOM | 5755 | HA   | LEU | 383 | 54.936 | 83.719 | 71.358 | 0.00 | 0.00 |
| ATOM | 5756 | CB   | LEU | 383 | 53.964 | 85.343 | 70.439 | 0.00 | 0.00 |
| ATOM | 5757 | HB2  | LEU | 383 | 54.225 | 86.388 | 70.271 | 0.00 | 0.00 |
| ATOM | 5758 | HB3  | LEU | 383 | 53.801 | 84.858 | 69.476 | 0.00 | 0.00 |
| ATOM | 5759 | CG   | LEU | 383 | 52.749 | 85.170 | 71.428 | 0.00 | 0.00 |
| ATOM | 5760 | HG   | LEU | 383 | 53.067 | 85.469 | 72.427 | 0.00 | 0.00 |
| ATOM | 5761 | CD1  | LEU | 383 | 51.585 | 86.076 | 71.004 | 0.00 | 0.00 |
| ATOM | 5762 | 1HD1 | LEU | 383 | 51.927 | 87.110 | 70.981 | 0.00 | 0.00 |
| ATOM | 5763 | 2HD1 | LEU | 383 | 51.224 | 85.828 | 70.006 | 0.00 | 0.00 |
| ATOM | 5764 | 3HD1 | LEU | 383 | 50.868 | 86.084 | 71.825 | 0.00 | 0.00 |
| ATOM | 5765 | CD2  | LEU | 383 | 52.090 | 83.733 | 71.705 | 0.00 | 0.00 |
| ATOM | 5766 | 1HD2 | LEU | 383 | 51.465 | 83.442 | 70.862 | 0.00 | 0.00 |
| ATOM | 5767 | 2HD2 | LEU | 383 | 52.984 | 83.133 | 71.873 | 0.00 | 0.00 |
| ATOM | 5768 | 3HD2 | LEU | 383 | 51.434 | 83.773 | 72.575 | 0.00 | 0.00 |
| ATOM | 5769 | C    | LEU | 383 | 56.238 | 84.561 | 69.901 | 0.00 | 0.00 |
| ATOM | 5770 | O    | LEU | 383 | 56.294 | 83.540 | 69.266 | 0.00 | 0.00 |
| ATOM | 5771 | N    | GLN | 384 | 57.124 | 85.522 | 69.661 | 0.00 | 0.00 |

|      |      |      |     |     |        |        |        |      |      |
|------|------|------|-----|-----|--------|--------|--------|------|------|
| ATOM | 5772 | H    | GLN | 384 | 56.990 | 86.315 | 70.272 | 0.00 | 0.00 |
| ATOM | 5773 | CA   | GLN | 384 | 58.397 | 85.367 | 68.912 | 0.00 | 0.00 |
| ATOM | 5774 | HA   | GLN | 384 | 58.104 | 84.964 | 67.943 | 0.00 | 0.00 |
| ATOM | 5775 | CB   | GLN | 384 | 59.011 | 86.745 | 68.609 | 0.00 | 0.00 |
| ATOM | 5776 | HB2  | GLN | 384 | 58.890 | 87.414 | 69.461 | 0.00 | 0.00 |
| ATOM | 5777 | HB3  | GLN | 384 | 60.073 | 86.601 | 68.410 | 0.00 | 0.00 |
| ATOM | 5778 | CG   | GLN | 384 | 58.276 | 87.464 | 67.458 | 0.00 | 0.00 |
| ATOM | 5779 | HG2  | GLN | 384 | 58.492 | 86.852 | 66.581 | 0.00 | 0.00 |
| ATOM | 5780 | HG3  | GLN | 384 | 57.197 | 87.434 | 67.609 | 0.00 | 0.00 |
| ATOM | 5781 | CD   | GLN | 384 | 58.688 | 88.932 | 67.381 | 0.00 | 0.00 |
| ATOM | 5782 | OE1  | GLN | 384 | 58.532 | 89.729 | 68.276 | 0.00 | 0.00 |
| ATOM | 5783 | NE2  | GLN | 384 | 59.295 | 89.364 | 66.302 | 0.00 | 0.00 |
| ATOM | 5784 | 1HE2 | GLN | 384 | 59.700 | 90.289 | 66.286 | 0.00 | 0.00 |
| ATOM | 5785 | 2HE2 | GLN | 384 | 59.233 | 88.815 | 65.456 | 0.00 | 0.00 |
| ATOM | 5786 | C    | GLN | 384 | 59.395 | 84.304 | 69.426 | 0.00 | 0.00 |
| ATOM | 5787 | O    | GLN | 384 | 60.238 | 83.790 | 68.656 | 0.00 | 0.00 |
| ATOM | 5788 | N    | ALA | 385 | 59.305 | 83.951 | 70.698 | 0.00 | 0.00 |
| ATOM | 5789 | H    | ALA | 385 | 58.698 | 84.539 | 71.251 | 0.00 | 0.00 |
| ATOM | 5790 | CA   | ALA | 385 | 60.166 | 82.921 | 71.275 | 0.00 | 0.00 |
| ATOM | 5791 | HA   | ALA | 385 | 61.057 | 82.712 | 70.684 | 0.00 | 0.00 |
| ATOM | 5792 | CB   | ALA | 385 | 60.623 | 83.452 | 72.638 | 0.00 | 0.00 |
| ATOM | 5793 | HB1  | ALA | 385 | 61.346 | 82.784 | 73.106 | 0.00 | 0.00 |
| ATOM | 5794 | HB2  | ALA | 385 | 61.237 | 84.344 | 72.508 | 0.00 | 0.00 |
| ATOM | 5795 | HB3  | ALA | 385 | 59.780 | 83.657 | 73.298 | 0.00 | 0.00 |
| ATOM | 5796 | C    | ALA | 385 | 59.523 | 81.551 | 71.331 | 0.00 | 0.00 |
| ATOM | 5797 | O    | ALA | 385 | 60.218 | 80.524 | 71.143 | 0.00 | 0.00 |

|      |      |     |     |     |        |        |        |      |      |
|------|------|-----|-----|-----|--------|--------|--------|------|------|
| ATOM | 5798 | N   | ALA | 386 | 58.265 | 81.503 | 71.731 | 0.00 | 0.00 |
| ATOM | 5799 | H   | ALA | 386 | 57.774 | 82.380 | 71.831 | 0.00 | 0.00 |
| ATOM | 5800 | CA  | ALA | 386 | 57.576 | 80.334 | 72.016 | 0.00 | 0.00 |
| ATOM | 5801 | HA  | ALA | 386 | 58.188 | 79.625 | 72.575 | 0.00 | 0.00 |
| ATOM | 5802 | CB  | ALA | 386 | 56.364 | 80.769 | 72.833 | 0.00 | 0.00 |
| ATOM | 5803 | HB1 | ALA | 386 | 56.753 | 81.156 | 73.775 | 0.00 | 0.00 |
| ATOM | 5804 | HB2 | ALA | 386 | 55.814 | 81.556 | 72.318 | 0.00 | 0.00 |
| ATOM | 5805 | HB3 | ALA | 386 | 55.671 | 79.962 | 73.069 | 0.00 | 0.00 |
| ATOM | 5806 | C   | ALA | 386 | 57.248 | 79.460 | 70.778 | 0.00 | 0.00 |
| ATOM | 5807 | O   | ALA | 386 | 57.114 | 78.254 | 70.857 | 0.00 | 0.00 |
| ATOM | 5808 | N   | ASP | 387 | 57.358 | 80.013 | 69.594 | 0.00 | 0.00 |
| ATOM | 5809 | H   | ASP | 387 | 57.390 | 81.020 | 69.654 | 0.00 | 0.00 |
| ATOM | 5810 | CA  | ASP | 387 | 57.131 | 79.361 | 68.356 | 0.00 | 0.00 |
| ATOM | 5811 | HA  | ASP | 387 | 56.249 | 78.719 | 68.353 | 0.00 | 0.00 |
| ATOM | 5812 | CB  | ASP | 387 | 56.980 | 80.438 | 67.335 | 0.00 | 0.00 |
| ATOM | 5813 | HB2 | ASP | 387 | 56.305 | 81.191 | 67.743 | 0.00 | 0.00 |
| ATOM | 5814 | HB3 | ASP | 387 | 57.951 | 80.917 | 67.213 | 0.00 | 0.00 |
| ATOM | 5815 | CG  | ASP | 387 | 56.507 | 79.907 | 65.990 | 0.00 | 0.00 |
| ATOM | 5816 | OD1 | ASP | 387 | 57.045 | 80.252 | 64.925 | 0.00 | 0.00 |
| ATOM | 5817 | OD2 | ASP | 387 | 55.469 | 79.212 | 65.952 | 0.00 | 0.00 |
| ATOM | 5818 | C   | ASP | 387 | 58.274 | 78.387 | 68.153 | 0.00 | 0.00 |
| ATOM | 5819 | O   | ASP | 387 | 58.146 | 77.330 | 67.527 | 0.00 | 0.00 |
| ATOM | 5820 | N   | SER | 388 | 59.433 | 78.758 | 68.668 | 0.00 | 0.00 |
| ATOM | 5821 | H   | SER | 388 | 59.535 | 79.589 | 69.233 | 0.00 | 0.00 |
| ATOM | 5822 | CA  | SER | 388 | 60.661 | 77.988 | 68.534 | 0.00 | 0.00 |
| ATOM | 5823 | HA  | SER | 388 | 60.743 | 77.410 | 67.614 | 0.00 | 0.00 |

|      |      |      |     |     |        |        |        |      |      |
|------|------|------|-----|-----|--------|--------|--------|------|------|
| ATOM | 5824 | CB   | SER | 388 | 61.820 | 78.945 | 68.375 | 0.00 | 0.00 |
| ATOM | 5825 | HB2  | SER | 388 | 61.754 | 79.715 | 69.143 | 0.00 | 0.00 |
| ATOM | 5826 | HB3  | SER | 388 | 62.832 | 78.586 | 68.561 | 0.00 | 0.00 |
| ATOM | 5827 | OG   | SER | 388 | 61.943 | 79.557 | 67.127 | 0.00 | 0.00 |
| ATOM | 5828 | HG   | SER | 388 | 61.296 | 80.266 | 67.119 | 0.00 | 0.00 |
| ATOM | 5829 | C    | SER | 388 | 60.938 | 77.031 | 69.682 | 0.00 | 0.00 |
| ATOM | 5830 | O    | SER | 388 | 62.048 | 76.533 | 69.819 | 0.00 | 0.00 |
| ATOM | 5831 | N    | LEU | 389 | 60.094 | 76.949 | 70.696 | 0.00 | 0.00 |
| ATOM | 5832 | H    | LEU | 389 | 59.300 | 77.555 | 70.545 | 0.00 | 0.00 |
| ATOM | 5833 | CA   | LEU | 389 | 60.200 | 76.059 | 71.860 | 0.00 | 0.00 |
| ATOM | 5834 | HA   | LEU | 389 | 61.262 | 75.911 | 72.055 | 0.00 | 0.00 |
| ATOM | 5835 | CB   | LEU | 389 | 59.509 | 76.670 | 73.064 | 0.00 | 0.00 |
| ATOM | 5836 | HB2  | LEU | 389 | 58.503 | 76.919 | 72.728 | 0.00 | 0.00 |
| ATOM | 5837 | HB3  | LEU | 389 | 59.266 | 75.952 | 73.848 | 0.00 | 0.00 |
| ATOM | 5838 | CG   | LEU | 389 | 60.237 | 77.793 | 73.771 | 0.00 | 0.00 |
| ATOM | 5839 | HG   | LEU | 389 | 60.685 | 78.628 | 73.231 | 0.00 | 0.00 |
| ATOM | 5840 | CD1  | LEU | 389 | 59.381 | 78.297 | 74.968 | 0.00 | 0.00 |
| ATOM | 5841 | 1HD1 | LEU | 389 | 59.974 | 79.121 | 75.365 | 0.00 | 0.00 |
| ATOM | 5842 | 2HD1 | LEU | 389 | 58.453 | 78.704 | 74.566 | 0.00 | 0.00 |
| ATOM | 5843 | 3HD1 | LEU | 389 | 59.114 | 77.574 | 75.738 | 0.00 | 0.00 |
| ATOM | 5844 | CD2  | LEU | 389 | 61.514 | 77.245 | 74.494 | 0.00 | 0.00 |
| ATOM | 5845 | 1HD2 | LEU | 389 | 61.429 | 76.268 | 74.969 | 0.00 | 0.00 |
| ATOM | 5846 | 2HD2 | LEU | 389 | 62.308 | 77.175 | 73.751 | 0.00 | 0.00 |
| ATOM | 5847 | 3HD2 | LEU | 389 | 61.708 | 77.889 | 75.352 | 0.00 | 0.00 |
| ATOM | 5848 | C    | LEU | 389 | 59.430 | 74.703 | 71.599 | 0.00 | 0.00 |
| ATOM | 5849 | O    | LEU | 389 | 58.454 | 74.652 | 70.844 | 0.00 | 0.00 |

|      |      |      |     |     |        |        |        |      |      |
|------|------|------|-----|-----|--------|--------|--------|------|------|
| ATOM | 5850 | N    | PRO | 390 | 59.771 | 73.605 | 72.220 | 0.00 | 0.00 |
| ATOM | 5851 | CD   | PRO | 390 | 60.636 | 73.388 | 73.332 | 0.00 | 0.00 |
| ATOM | 5852 | HD2  | PRO | 390 | 61.423 | 74.131 | 73.460 | 0.00 | 0.00 |
| ATOM | 5853 | HD3  | PRO | 390 | 60.082 | 73.331 | 74.269 | 0.00 | 0.00 |
| ATOM | 5854 | CG   | PRO | 390 | 61.375 | 72.035 | 73.183 | 0.00 | 0.00 |
| ATOM | 5855 | HG2  | PRO | 390 | 62.201 | 72.122 | 72.477 | 0.00 | 0.00 |
| ATOM | 5856 | HG3  | PRO | 390 | 61.529 | 71.553 | 74.148 | 0.00 | 0.00 |
| ATOM | 5857 | CB   | PRO | 390 | 60.210 | 71.230 | 72.526 | 0.00 | 0.00 |
| ATOM | 5858 | HB2  | PRO | 390 | 60.611 | 70.481 | 71.843 | 0.00 | 0.00 |
| ATOM | 5859 | HB3  | PRO | 390 | 59.481 | 70.846 | 73.239 | 0.00 | 0.00 |
| ATOM | 5860 | CA   | PRO | 390 | 59.339 | 72.265 | 71.784 | 0.00 | 0.00 |
| ATOM | 5861 | HA   | PRO | 390 | 59.445 | 72.239 | 70.700 | 0.00 | 0.00 |
| ATOM | 5862 | C    | PRO | 390 | 57.863 | 71.966 | 72.152 | 0.00 | 0.00 |
| ATOM | 5863 | O    | PRO | 390 | 57.116 | 71.382 | 71.353 | 0.00 | 0.00 |
| ATOM | 5864 | N    | VAL | 391 | 57.321 | 72.445 | 73.258 | 0.00 | 0.00 |
| ATOM | 5865 | H    | VAL | 391 | 57.935 | 72.985 | 73.852 | 0.00 | 0.00 |
| ATOM | 5866 | CA   | VAL | 391 | 55.971 | 72.302 | 73.733 | 0.00 | 0.00 |
| ATOM | 5867 | HA   | VAL | 391 | 55.678 | 71.256 | 73.645 | 0.00 | 0.00 |
| ATOM | 5868 | CB   | VAL | 391 | 55.964 | 72.623 | 75.257 | 0.00 | 0.00 |
| ATOM | 5869 | HB   | VAL | 391 | 54.980 | 72.535 | 75.718 | 0.00 | 0.00 |
| ATOM | 5870 | CG1  | VAL | 391 | 56.957 | 71.766 | 76.102 | 0.00 | 0.00 |
| ATOM | 5871 | 1HG1 | VAL | 391 | 56.916 | 71.880 | 77.186 | 0.00 | 0.00 |
| ATOM | 5872 | 2HG1 | VAL | 391 | 56.855 | 70.718 | 75.820 | 0.00 | 0.00 |
| ATOM | 5873 | 3HG1 | VAL | 391 | 57.934 | 72.119 | 75.773 | 0.00 | 0.00 |
| ATOM | 5874 | CG2  | VAL | 391 | 56.485 | 74.057 | 75.372 | 0.00 | 0.00 |
| ATOM | 5875 | 1HG2 | VAL | 391 | 56.332 | 74.304 | 76.423 | 0.00 | 0.00 |

ATOM 5876 2HG2 VAL 391 57.533 74.212 75.117 0.00 0.00  
ATOM 5877 3HG2 VAL 391 55.709 74.683 74.930 0.00 0.00  
ATOM 5878 C VAL 391 54.940 73.066 72.910 0.00 0.00  
ATOM 5879 O VAL 391 55.362 74.102 72.336 0.00 0.00  
ATOM 5880 N ASN 392 53.620 72.687 72.952 0.00 0.00  
ATOM 5881 H ASN 392 53.409 71.972 73.633 0.00 0.00  
ATOM 5882 CA ASN 392 52.542 73.656 72.612 0.00 0.00  
ATOM 5883 HA ASN 392 52.707 74.016 71.596 0.00 0.00  
ATOM 5884 CB ASN 392 51.176 72.916 72.483 0.00 0.00  
ATOM 5885 HB2 ASN 392 50.735 72.816 73.475 0.00 0.00  
ATOM 5886 HB3 ASN 392 50.598 73.519 71.782 0.00 0.00  
ATOM 5887 CG ASN 392 51.342 71.516 71.879 0.00 0.00  
ATOM 5888 OD1 ASN 392 51.966 71.303 70.877 0.00 0.00  
ATOM 5889 ND2 ASN 392 50.867 70.581 72.610 0.00 0.00  
ATOM 5890 1HD2 ASN 392 51.104 69.639 72.333 0.00 0.00  
ATOM 5891 2HD2 ASN 392 50.454 70.713 73.522 0.00 0.00  
ATOM 5892 C ASN 392 52.453 74.828 73.582 0.00 0.00  
ATOM 5893 O ASN 392 52.572 74.463 74.769 0.00 0.00  
ATOM 5894 N ILE 393 52.043 76.017 73.194 0.00 0.00  
ATOM 5895 H ILE 393 51.771 76.210 72.241 0.00 0.00  
ATOM 5896 CA ILE 393 51.958 77.215 74.039 0.00 0.00  
ATOM 5897 HA ILE 393 51.766 76.848 75.047 0.00 0.00  
ATOM 5898 CB ILE 393 53.325 77.962 74.155 0.00 0.00  
ATOM 5899 HB ILE 393 53.625 78.238 73.144 0.00 0.00  
ATOM 5900 CG2 ILE 393 53.224 79.171 75.228 0.00 0.00  
ATOM 5901 1HG2 ILE 393 53.047 78.825 76.247 0.00 0.00

|      |      |      |     |     |        |        |        |      |      |
|------|------|------|-----|-----|--------|--------|--------|------|------|
| ATOM | 5902 | 2HG2 | ILE | 393 | 54.184 | 79.687 | 75.247 | 0.00 | 0.00 |
| ATOM | 5903 | 3HG2 | ILE | 393 | 52.469 | 79.928 | 75.014 | 0.00 | 0.00 |
| ATOM | 5904 | CG1  | ILE | 393 | 54.478 | 77.014 | 74.646 | 0.00 | 0.00 |
| ATOM | 5905 | 2HG1 | ILE | 393 | 54.260 | 76.676 | 75.659 | 0.00 | 0.00 |
| ATOM | 5906 | 3HG1 | ILE | 393 | 54.532 | 76.156 | 73.976 | 0.00 | 0.00 |
| ATOM | 5907 | CD1  | ILE | 393 | 55.895 | 77.520 | 74.659 | 0.00 | 0.00 |
| ATOM | 5908 | 1HD1 | ILE | 393 | 56.586 | 76.815 | 75.121 | 0.00 | 0.00 |
| ATOM | 5909 | 2HD1 | ILE | 393 | 56.247 | 77.783 | 73.662 | 0.00 | 0.00 |
| ATOM | 5910 | 3HD1 | ILE | 393 | 55.943 | 78.441 | 75.240 | 0.00 | 0.00 |
| ATOM | 5911 | C    | ILE | 393 | 50.788 | 78.217 | 73.814 | 0.00 | 0.00 |
| ATOM | 5912 | O    | ILE | 393 | 50.380 | 78.446 | 72.680 | 0.00 | 0.00 |
| ATOM | 5913 | N    | GLY | 394 | 50.283 | 78.747 | 74.931 | 0.00 | 0.00 |
| ATOM | 5914 | H    | GLY | 394 | 50.724 | 78.532 | 75.814 | 0.00 | 0.00 |
| ATOM | 5915 | CA   | GLY | 394 | 49.367 | 79.814 | 75.062 | 0.00 | 0.00 |
| ATOM | 5916 | HA2  | GLY | 394 | 48.353 | 79.414 | 75.061 | 0.00 | 0.00 |
| ATOM | 5917 | HA3  | GLY | 394 | 49.386 | 80.540 | 74.249 | 0.00 | 0.00 |
| ATOM | 5918 | C    | GLY | 394 | 49.636 | 80.669 | 76.334 | 0.00 | 0.00 |
| ATOM | 5919 | O    | GLY | 394 | 50.150 | 80.180 | 77.316 | 0.00 | 0.00 |
| ATOM | 5920 | N    | LEU | 395 | 49.354 | 81.965 | 76.351 | 0.00 | 0.00 |
| ATOM | 5921 | H    | LEU | 395 | 48.856 | 82.396 | 75.585 | 0.00 | 0.00 |
| ATOM | 5922 | CA   | LEU | 395 | 49.767 | 82.930 | 77.379 | 0.00 | 0.00 |
| ATOM | 5923 | HA   | LEU | 395 | 50.400 | 82.451 | 78.125 | 0.00 | 0.00 |
| ATOM | 5924 | CB   | LEU | 395 | 50.705 | 83.981 | 76.717 | 0.00 | 0.00 |
| ATOM | 5925 | HB2  | LEU | 395 | 50.095 | 84.514 | 75.989 | 0.00 | 0.00 |
| ATOM | 5926 | HB3  | LEU | 395 | 51.057 | 84.708 | 77.449 | 0.00 | 0.00 |
| ATOM | 5927 | CG   | LEU | 395 | 51.974 | 83.478 | 75.986 | 0.00 | 0.00 |

|      |      |      |     |     |        |        |        |      |      |
|------|------|------|-----|-----|--------|--------|--------|------|------|
| ATOM | 5928 | HG   | LEU | 395 | 51.727 | 82.864 | 75.120 | 0.00 | 0.00 |
| ATOM | 5929 | CD1  | LEU | 395 | 52.781 | 84.670 | 75.309 | 0.00 | 0.00 |
| ATOM | 5930 | 1HD1 | LEU | 395 | 53.337 | 85.337 | 75.967 | 0.00 | 0.00 |
| ATOM | 5931 | 2HD1 | LEU | 395 | 53.483 | 84.208 | 74.615 | 0.00 | 0.00 |
| ATOM | 5932 | 3HD1 | LEU | 395 | 52.090 | 85.379 | 74.852 | 0.00 | 0.00 |
| ATOM | 5933 | CD2  | LEU | 395 | 52.895 | 82.633 | 76.887 | 0.00 | 0.00 |
| ATOM | 5934 | 1HD2 | LEU | 395 | 52.608 | 82.903 | 77.903 | 0.00 | 0.00 |
| ATOM | 5935 | 2HD2 | LEU | 395 | 52.625 | 81.618 | 76.594 | 0.00 | 0.00 |
| ATOM | 5936 | 3HD2 | LEU | 395 | 53.960 | 82.703 | 76.665 | 0.00 | 0.00 |
| ATOM | 5937 | C    | LEU | 395 | 48.687 | 83.435 | 78.247 | 0.00 | 0.00 |
| ATOM | 5938 | O    | LEU | 395 | 47.537 | 83.725 | 77.855 | 0.00 | 0.00 |
| ATOM | 5939 | N    | LEU | 396 | 49.067 | 83.743 | 79.501 | 0.00 | 0.00 |
| ATOM | 5940 | H    | LEU | 396 | 49.973 | 83.397 | 79.784 | 0.00 | 0.00 |
| ATOM | 5941 | CA   | LEU | 396 | 48.342 | 84.575 | 80.493 | 0.00 | 0.00 |
| ATOM | 5942 | HA   | LEU | 396 | 47.285 | 84.595 | 80.231 | 0.00 | 0.00 |
| ATOM | 5943 | CB   | LEU | 396 | 48.349 | 83.958 | 81.932 | 0.00 | 0.00 |
| ATOM | 5944 | HB2  | LEU | 396 | 49.398 | 83.871 | 82.218 | 0.00 | 0.00 |
| ATOM | 5945 | HB3  | LEU | 396 | 47.851 | 84.616 | 82.644 | 0.00 | 0.00 |
| ATOM | 5946 | CG   | LEU | 396 | 47.925 | 82.507 | 81.928 | 0.00 | 0.00 |
| ATOM | 5947 | HG   | LEU | 396 | 48.655 | 81.906 | 81.385 | 0.00 | 0.00 |
| ATOM | 5948 | CD1  | LEU | 396 | 47.817 | 81.909 | 83.326 | 0.00 | 0.00 |
| ATOM | 5949 | 1HD1 | LEU | 396 | 47.497 | 80.867 | 83.305 | 0.00 | 0.00 |
| ATOM | 5950 | 2HD1 | LEU | 396 | 48.790 | 81.875 | 83.817 | 0.00 | 0.00 |
| ATOM | 5951 | 3HD1 | LEU | 396 | 47.124 | 82.478 | 83.945 | 0.00 | 0.00 |
| ATOM | 5952 | CD2  | LEU | 396 | 46.564 | 82.225 | 81.226 | 0.00 | 0.00 |
| ATOM | 5953 | 1HD2 | LEU | 396 | 46.740 | 82.217 | 80.151 | 0.00 | 0.00 |



|      |      |      |     |     |        |        |        |      |      |
|------|------|------|-----|-----|--------|--------|--------|------|------|
| ATOM | 5954 | 2HD2 | LEU | 396 | 46.151 | 81.230 | 81.394 | 0.00 | 0.00 |
| ATOM | 5955 | 3HD2 | LEU | 396 | 45.853 | 82.938 | 81.643 | 0.00 | 0.00 |
| ATOM | 5956 | C    | LEU | 396 | 48.877 | 86.043 | 80.737 | 0.00 | 0.00 |
| ATOM | 5957 | O    | LEU | 396 | 50.001 | 86.280 | 81.150 | 0.00 | 0.00 |
| ATOM | 5958 | N    | GLY | 397 | 47.952 | 87.064 | 80.505 | 0.00 | 0.00 |
| ATOM | 5959 | H    | GLY | 397 | 47.119 | 86.935 | 79.949 | 0.00 | 0.00 |
| ATOM | 5960 | CA   | GLY | 397 | 48.385 | 88.472 | 80.620 | 0.00 | 0.00 |
| ATOM | 5961 | HA2  | GLY | 397 | 49.400 | 88.518 | 80.226 | 0.00 | 0.00 |
| ATOM | 5962 | HA3  | GLY | 397 | 47.723 | 89.104 | 80.027 | 0.00 | 0.00 |
| ATOM | 5963 | C    | GLY | 397 | 48.392 | 88.960 | 82.095 | 0.00 | 0.00 |
| ATOM | 5964 | O    | GLY | 397 | 47.879 | 88.341 | 83.005 | 0.00 | 0.00 |
| ATOM | 5965 | N    | LYS | 398 | 48.913 | 90.203 | 82.249 | 0.00 | 0.00 |
| ATOM | 5966 | H    | LYS | 398 | 49.424 | 90.710 | 81.541 | 0.00 | 0.00 |
| ATOM | 5967 | CA   | LYS | 398 | 48.699 | 90.970 | 83.523 | 0.00 | 0.00 |
| ATOM | 5968 | HA   | LYS | 398 | 48.937 | 90.201 | 84.258 | 0.00 | 0.00 |
| ATOM | 5969 | CB   | LYS | 398 | 49.657 | 92.115 | 83.566 | 0.00 | 0.00 |
| ATOM | 5970 | HB2  | LYS | 398 | 50.718 | 91.895 | 83.445 | 0.00 | 0.00 |
| ATOM | 5971 | HB3  | LYS | 398 | 49.505 | 92.792 | 82.726 | 0.00 | 0.00 |
| ATOM | 5972 | CG   | LYS | 398 | 49.490 | 92.798 | 84.931 | 0.00 | 0.00 |
| ATOM | 5973 | HG2  | LYS | 398 | 48.440 | 93.082 | 85.001 | 0.00 | 0.00 |
| ATOM | 5974 | HG3  | LYS | 398 | 49.672 | 92.037 | 85.690 | 0.00 | 0.00 |
| ATOM | 5975 | CD   | LYS | 398 | 50.376 | 93.994 | 85.218 | 0.00 | 0.00 |
| ATOM | 5976 | HD2  | LYS | 398 | 50.075 | 94.809 | 84.559 | 0.00 | 0.00 |
| ATOM | 5977 | HD3  | LYS | 398 | 50.166 | 94.409 | 86.204 | 0.00 | 0.00 |
| ATOM | 5978 | CE   | LYS | 398 | 51.876 | 93.741 | 85.152 | 0.00 | 0.00 |
| ATOM | 5979 | HE2  | LYS | 398 | 52.032 | 93.069 | 85.996 | 0.00 | 0.00 |

|      |      |      |     |     |        |        |        |      |      |
|------|------|------|-----|-----|--------|--------|--------|------|------|
| ATOM | 5980 | HE3  | LYS | 398 | 52.146 | 93.229 | 84.229 | 0.00 | 0.00 |
| ATOM | 5981 | NZ   | LYS | 398 | 52.605 | 94.947 | 85.390 | 0.00 | 0.00 |
| ATOM | 5982 | HZ1  | LYS | 398 | 52.600 | 95.520 | 84.558 | 0.00 | 0.00 |
| ATOM | 5983 | HZ2  | LYS | 398 | 52.182 | 95.444 | 86.161 | 0.00 | 0.00 |
| ATOM | 5984 | HZ3  | LYS | 398 | 53.516 | 94.723 | 85.764 | 0.00 | 0.00 |
| ATOM | 5985 | C    | LYS | 398 | 47.232 | 91.336 | 83.617 | 0.00 | 0.00 |
| ATOM | 5986 | O    | LYS | 398 | 46.689 | 92.253 | 83.039 | 0.00 | 0.00 |
| ATOM | 5987 | N    | GLY | 399 | 46.561 | 90.687 | 84.587 | 0.00 | 0.00 |
| ATOM | 5988 | H    | GLY | 399 | 46.956 | 89.766 | 84.708 | 0.00 | 0.00 |
| ATOM | 5989 | CA   | GLY | 399 | 45.255 | 91.033 | 85.153 | 0.00 | 0.00 |
| ATOM | 5990 | HA2  | GLY | 399 | 44.480 | 91.258 | 84.420 | 0.00 | 0.00 |
| ATOM | 5991 | HA3  | GLY | 399 | 44.893 | 90.151 | 85.681 | 0.00 | 0.00 |
| ATOM | 5992 | C    | GLY | 399 | 45.273 | 92.138 | 86.254 | 0.00 | 0.00 |
| ATOM | 5993 | O    | GLY | 399 | 44.269 | 92.813 | 86.395 | 0.00 | 0.00 |
| ATOM | 5994 | N    | ASN | 400 | 46.394 | 92.448 | 86.953 | 0.00 | 0.00 |
| ATOM | 5995 | H    | ASN | 400 | 47.253 | 91.951 | 86.765 | 0.00 | 0.00 |
| ATOM | 5996 | CA   | ASN | 400 | 46.521 | 93.596 | 87.842 | 0.00 | 0.00 |
| ATOM | 5997 | HA   | ASN | 400 | 45.722 | 93.608 | 88.583 | 0.00 | 0.00 |
| ATOM | 5998 | CB   | ASN | 400 | 47.839 | 93.523 | 88.634 | 0.00 | 0.00 |
| ATOM | 5999 | HB2  | ASN | 400 | 48.732 | 93.777 | 88.063 | 0.00 | 0.00 |
| ATOM | 6000 | HB3  | ASN | 400 | 47.875 | 94.347 | 89.348 | 0.00 | 0.00 |
| ATOM | 6001 | CG   | ASN | 400 | 48.064 | 92.247 | 89.352 | 0.00 | 0.00 |
| ATOM | 6002 | OD1  | ASN | 400 | 48.396 | 91.241 | 88.709 | 0.00 | 0.00 |
| ATOM | 6003 | ND2  | ASN | 400 | 47.861 | 92.293 | 90.638 | 0.00 | 0.00 |
| ATOM | 6004 | 1HD2 | ASN | 400 | 48.099 | 91.549 | 91.278 | 0.00 | 0.00 |
| ATOM | 6005 | 2HD2 | ASN | 400 | 47.462 | 93.168 | 90.948 | 0.00 | 0.00 |

|      |      |      |     |     |        |         |        |      |      |
|------|------|------|-----|-----|--------|---------|--------|------|------|
| ATOM | 6006 | C    | ASN | 400 | 46.453 | 94.976  | 87.163 | 0.00 | 0.00 |
| ATOM | 6007 | O    | ASN | 400 | 47.401 | 95.689  | 87.087 | 0.00 | 0.00 |
| ATOM | 6008 | N    | VAL | 401 | 45.332 | 95.334  | 86.616 | 0.00 | 0.00 |
| ATOM | 6009 | H    | VAL | 401 | 44.567 | 94.699  | 86.438 | 0.00 | 0.00 |
| ATOM | 6010 | CA   | VAL | 401 | 44.856 | 96.678  | 86.283 | 0.00 | 0.00 |
| ATOM | 6011 | HA   | VAL | 401 | 45.412 | 97.326  | 86.961 | 0.00 | 0.00 |
| ATOM | 6012 | CB   | VAL | 401 | 45.423 | 97.023  | 84.909 | 0.00 | 0.00 |
| ATOM | 6013 | HB   | VAL | 401 | 46.502 | 96.878  | 84.847 | 0.00 | 0.00 |
| ATOM | 6014 | CG1  | VAL | 401 | 44.934 | 96.158  | 83.773 | 0.00 | 0.00 |
| ATOM | 6015 | 1HG1 | VAL | 401 | 43.907 | 96.486  | 83.612 | 0.00 | 0.00 |
| ATOM | 6016 | 2HG1 | VAL | 401 | 45.516 | 96.429  | 82.892 | 0.00 | 0.00 |
| ATOM | 6017 | 3HG1 | VAL | 401 | 45.040 | 95.159  | 84.196 | 0.00 | 0.00 |
| ATOM | 6018 | CG2  | VAL | 401 | 45.163 | 98.496  | 84.595 | 0.00 | 0.00 |
| ATOM | 6019 | 1HG2 | VAL | 401 | 45.869 | 98.776  | 83.813 | 0.00 | 0.00 |
| ATOM | 6020 | 2HG2 | VAL | 401 | 44.120 | 98.604  | 84.296 | 0.00 | 0.00 |
| ATOM | 6021 | 3HG2 | VAL | 401 | 45.315 | 99.045  | 85.524 | 0.00 | 0.00 |
| ATOM | 6022 | C    | VAL | 401 | 43.327 | 96.873  | 86.455 | 0.00 | 0.00 |
| ATOM | 6023 | O    | VAL | 401 | 42.492 | 96.061  | 86.079 | 0.00 | 0.00 |
| ATOM | 6024 | N    | SER | 402 | 43.013 | 98.099  | 86.759 | 0.00 | 0.00 |
| ATOM | 6025 | H    | SER | 402 | 43.732 | 98.514  | 87.335 | 0.00 | 0.00 |
| ATOM | 6026 | CA   | SER | 402 | 41.590 | 98.560  | 86.981 | 0.00 | 0.00 |
| ATOM | 6027 | HA   | SER | 402 | 40.943 | 97.683  | 86.984 | 0.00 | 0.00 |
| ATOM | 6028 | CB   | SER | 402 | 41.369 | 99.179  | 88.393 | 0.00 | 0.00 |
| ATOM | 6029 | HB2  | SER | 402 | 41.818 | 100.169 | 88.310 | 0.00 | 0.00 |
| ATOM | 6030 | HB3  | SER | 402 | 40.282 | 99.258  | 88.412 | 0.00 | 0.00 |
| ATOM | 6031 | OG   | SER | 402 | 41.824 | 98.366  | 89.467 | 0.00 | 0.00 |

|      |      |      |     |     |        |         |        |      |      |
|------|------|------|-----|-----|--------|---------|--------|------|------|
| ATOM | 6032 | HG   | SER | 402 | 42.778 | 98.346  | 89.370 | 0.00 | 0.00 |
| ATOM | 6033 | C    | SER | 402 | 41.083 | 99.448  | 85.832 | 0.00 | 0.00 |
| ATOM | 6034 | O    | SER | 402 | 40.332 | 100.397 | 85.939 | 0.00 | 0.00 |
| ATOM | 6035 | N    | GLN | 403 | 41.576 | 99.209  | 84.646 | 0.00 | 0.00 |
| ATOM | 6036 | H    | GLN | 403 | 42.262 | 98.471  | 84.586 | 0.00 | 0.00 |
| ATOM | 6037 | CA   | GLN | 403 | 41.278 | 99.904  | 83.347 | 0.00 | 0.00 |
| ATOM | 6038 | HA   | GLN | 403 | 40.308 | 100.400 | 83.377 | 0.00 | 0.00 |
| ATOM | 6039 | CB   | GLN | 403 | 42.501 | 100.862 | 83.144 | 0.00 | 0.00 |
| ATOM | 6040 | HB2  | GLN | 403 | 42.798 | 101.279 | 84.106 | 0.00 | 0.00 |
| ATOM | 6041 | HB3  | GLN | 403 | 43.383 | 100.288 | 82.859 | 0.00 | 0.00 |
| ATOM | 6042 | CG   | GLN | 403 | 42.345 | 101.800 | 81.888 | 0.00 | 0.00 |
| ATOM | 6043 | HG2  | GLN | 403 | 42.840 | 102.731 | 82.164 | 0.00 | 0.00 |
| ATOM | 6044 | HG3  | GLN | 403 | 42.970 | 101.541 | 81.034 | 0.00 | 0.00 |
| ATOM | 6045 | CD   | GLN | 403 | 40.853 | 102.057 | 81.547 | 0.00 | 0.00 |
| ATOM | 6046 | OE1  | GLN | 403 | 40.325 | 101.659 | 80.555 | 0.00 | 0.00 |
| ATOM | 6047 | NE2  | GLN | 403 | 40.194 | 102.806 | 82.390 | 0.00 | 0.00 |
| ATOM | 6048 | 1HE2 | GLN | 403 | 39.267 | 103.173 | 82.222 | 0.00 | 0.00 |
| ATOM | 6049 | 2HE2 | GLN | 403 | 40.706 | 103.044 | 83.227 | 0.00 | 0.00 |
| ATOM | 6050 | C    | GLN | 403 | 41.121 | 98.888  | 82.195 | 0.00 | 0.00 |
| ATOM | 6051 | O    | GLN | 403 | 42.132 | 98.284  | 81.769 | 0.00 | 0.00 |
| ATOM | 6052 | N    | PRO | 404 | 39.837 | 98.654  | 81.759 | 0.00 | 0.00 |
| ATOM | 6053 | CD   | PRO | 404 | 38.537 | 99.183  | 82.310 | 0.00 | 0.00 |
| ATOM | 6054 | HD2  | PRO | 404 | 38.202 | 98.718  | 83.237 | 0.00 | 0.00 |
| ATOM | 6055 | HD3  | PRO | 404 | 38.607 | 100.251 | 82.515 | 0.00 | 0.00 |
| ATOM | 6056 | CG   | PRO | 404 | 37.451 | 98.925  | 81.338 | 0.00 | 0.00 |
| ATOM | 6057 | HG2  | PRO | 404 | 36.448 | 98.830  | 81.754 | 0.00 | 0.00 |

|      |      |         |     |        |         |        |      |      |
|------|------|---------|-----|--------|---------|--------|------|------|
| ATOM | 6058 | HG3 PRO | 404 | 37.582 | 99.705  | 80.587 | 0.00 | 0.00 |
| ATOM | 6059 | CB PRO  | 404 | 37.985 | 97.593  | 80.853 | 0.00 | 0.00 |
| ATOM | 6060 | HB2 PRO | 404 | 37.692 | 96.722  | 81.439 | 0.00 | 0.00 |
| ATOM | 6061 | HB3 PRO | 404 | 37.601 | 97.412  | 79.850 | 0.00 | 0.00 |
| ATOM | 6062 | CA PRO  | 404 | 39.522 | 97.568  | 80.899 | 0.00 | 0.00 |
| ATOM | 6063 | HA PRO  | 404 | 39.943 | 96.713  | 81.428 | 0.00 | 0.00 |
| ATOM | 6064 | C PRO   | 404 | 40.245 | 97.596  | 79.553 | 0.00 | 0.00 |
| ATOM | 6065 | O PRO   | 404 | 40.644 | 96.568  | 78.965 | 0.00 | 0.00 |
| ATOM | 6066 | N ASP   | 405 | 40.567 | 98.805  | 79.022 | 0.00 | 0.00 |
| ATOM | 6067 | H ASP   | 405 | 40.324 | 99.638  | 79.538 | 0.00 | 0.00 |
| ATOM | 6068 | CA ASP  | 405 | 41.307 | 98.968  | 77.752 | 0.00 | 0.00 |
| ATOM | 6069 | HA ASP  | 405 | 40.805 | 98.319  | 77.035 | 0.00 | 0.00 |
| ATOM | 6070 | CB ASP  | 405 | 41.055 | 100.427 | 77.275 | 0.00 | 0.00 |
| ATOM | 6071 | HB2 ASP | 405 | 40.972 | 101.141 | 78.094 | 0.00 | 0.00 |
| ATOM | 6072 | HB3 ASP | 405 | 41.889 | 100.613 | 76.599 | 0.00 | 0.00 |
| ATOM | 6073 | CG ASP  | 405 | 39.874 | 100.458 | 76.382 | 0.00 | 0.00 |
| ATOM | 6074 | OD1 ASP | 405 | 38.948 | 101.225 | 76.652 | 0.00 | 0.00 |
| ATOM | 6075 | OD2 ASP | 405 | 39.746 | 99.603  | 75.472 | 0.00 | 0.00 |
| ATOM | 6076 | C ASP   | 405 | 42.766 | 98.519  | 77.771 | 0.00 | 0.00 |
| ATOM | 6077 | O ASP   | 405 | 43.273 | 98.157  | 76.756 | 0.00 | 0.00 |
| ATOM | 6078 | N ALA   | 406 | 43.407 | 98.482  | 78.950 | 0.00 | 0.00 |
| ATOM | 6079 | H ALA   | 406 | 42.908 | 98.708  | 79.799 | 0.00 | 0.00 |
| ATOM | 6080 | CA ALA  | 406 | 44.754 | 98.055  | 79.150 | 0.00 | 0.00 |
| ATOM | 6081 | HA ALA  | 406 | 45.394 | 98.247  | 78.289 | 0.00 | 0.00 |
| ATOM | 6082 | CB ALA  | 406 | 45.320 | 98.761  | 80.377 | 0.00 | 0.00 |
| ATOM | 6083 | HB1 ALA | 406 | 44.992 | 99.801  | 80.378 | 0.00 | 0.00 |

|      |      |      |     |     |        |        |        |      |      |
|------|------|------|-----|-----|--------|--------|--------|------|------|
| ATOM | 6084 | HB2  | ALA | 406 | 44.837 | 98.331 | 81.255 | 0.00 | 0.00 |
| ATOM | 6085 | HB3  | ALA | 406 | 46.391 | 98.577 | 80.457 | 0.00 | 0.00 |
| ATOM | 6086 | C    | ALA | 406 | 44.844 | 96.522 | 79.295 | 0.00 | 0.00 |
| ATOM | 6087 | O    | ALA | 406 | 45.917 | 95.974 | 78.994 | 0.00 | 0.00 |
| ATOM | 6088 | N    | LEU | 407 | 43.738 | 95.839 | 79.594 | 0.00 | 0.00 |
| ATOM | 6089 | H    | LEU | 407 | 42.953 | 96.475 | 79.587 | 0.00 | 0.00 |
| ATOM | 6090 | CA   | LEU | 407 | 43.529 | 94.376 | 79.476 | 0.00 | 0.00 |
| ATOM | 6091 | HA   | LEU | 407 | 44.461 | 93.856 | 79.701 | 0.00 | 0.00 |
| ATOM | 6092 | CB   | LEU | 407 | 42.375 | 94.012 | 80.433 | 0.00 | 0.00 |
| ATOM | 6093 | HB2  | LEU | 407 | 41.569 | 94.678 | 80.122 | 0.00 | 0.00 |
| ATOM | 6094 | HB3  | LEU | 407 | 42.155 | 92.956 | 80.273 | 0.00 | 0.00 |
| ATOM | 6095 | CG   | LEU | 407 | 42.786 | 94.209 | 81.914 | 0.00 | 0.00 |
| ATOM | 6096 | HG   | LEU | 407 | 42.958 | 95.281 | 82.011 | 0.00 | 0.00 |
| ATOM | 6097 | CD1  | LEU | 407 | 41.651 | 93.772 | 82.866 | 0.00 | 0.00 |
| ATOM | 6098 | 1HD1 | LEU | 407 | 40.734 | 94.334 | 82.693 | 0.00 | 0.00 |
| ATOM | 6099 | 2HD1 | LEU | 407 | 41.450 | 92.709 | 82.729 | 0.00 | 0.00 |
| ATOM | 6100 | 3HD1 | LEU | 407 | 41.836 | 93.916 | 83.931 | 0.00 | 0.00 |
| ATOM | 6101 | CD2  | LEU | 407 | 43.955 | 93.308 | 82.278 | 0.00 | 0.00 |
| ATOM | 6102 | 1HD2 | LEU | 407 | 44.908 | 93.638 | 81.864 | 0.00 | 0.00 |
| ATOM | 6103 | 2HD2 | LEU | 407 | 44.070 | 93.210 | 83.357 | 0.00 | 0.00 |
| ATOM | 6104 | 3HD2 | LEU | 407 | 43.651 | 92.342 | 81.874 | 0.00 | 0.00 |
| ATOM | 6105 | C    | LEU | 407 | 43.213 | 93.966 | 77.965 | 0.00 | 0.00 |
| ATOM | 6106 | O    | LEU | 407 | 43.814 | 92.981 | 77.467 | 0.00 | 0.00 |
| ATOM | 6107 | N    | ARG | 408 | 42.327 | 94.643 | 77.204 | 0.00 | 0.00 |
| ATOM | 6108 | H    | ARG | 408 | 41.670 | 95.280 | 77.632 | 0.00 | 0.00 |
| ATOM | 6109 | CA   | ARG | 408 | 42.017 | 94.403 | 75.808 | 0.00 | 0.00 |

|      |      |      |     |     |        |        |        |      |      |
|------|------|------|-----|-----|--------|--------|--------|------|------|
| ATOM | 6110 | HA   | ARG | 408 | 41.719 | 93.364 | 75.668 | 0.00 | 0.00 |
| ATOM | 6111 | CB   | ARG | 408 | 40.939 | 95.339 | 75.387 | 0.00 | 0.00 |
| ATOM | 6112 | HB2  | ARG | 408 | 41.209 | 96.393 | 75.461 | 0.00 | 0.00 |
| ATOM | 6113 | HB3  | ARG | 408 | 40.684 | 95.260 | 74.330 | 0.00 | 0.00 |
| ATOM | 6114 | CG   | ARG | 408 | 39.576 | 95.100 | 76.116 | 0.00 | 0.00 |
| ATOM | 6115 | HG2  | ARG | 408 | 39.122 | 94.114 | 76.023 | 0.00 | 0.00 |
| ATOM | 6116 | HG3  | ARG | 408 | 39.790 | 95.277 | 77.170 | 0.00 | 0.00 |
| ATOM | 6117 | CD   | ARG | 408 | 38.633 | 96.249 | 75.636 | 0.00 | 0.00 |
| ATOM | 6118 | HD2  | ARG | 408 | 39.133 | 97.208 | 75.771 | 0.00 | 0.00 |
| ATOM | 6119 | HD3  | ARG | 408 | 38.388 | 96.273 | 74.574 | 0.00 | 0.00 |
| ATOM | 6120 | NE   | ARG | 408 | 37.384 | 96.289 | 76.441 | 0.00 | 0.00 |
| ATOM | 6121 | HE   | ARG | 408 | 36.709 | 95.545 | 76.338 | 0.00 | 0.00 |
| ATOM | 6122 | CZ   | ARG | 408 | 36.852 | 97.245 | 77.117 | 0.00 | 0.00 |
| ATOM | 6123 | NH1  | ARG | 408 | 37.514 | 98.296 | 77.377 | 0.00 | 0.00 |
| ATOM | 6124 | 1HH1 | ARG | 408 | 36.927 | 99.089 | 77.588 | 0.00 | 0.00 |
| ATOM | 6125 | 2HH1 | ARG | 408 | 38.419 | 98.420 | 76.945 | 0.00 | 0.00 |
| ATOM | 6126 | NH2  | ARG | 408 | 35.652 | 97.154 | 77.600 | 0.00 | 0.00 |
| ATOM | 6127 | 1HH2 | ARG | 408 | 35.124 | 97.779 | 78.192 | 0.00 | 0.00 |
| ATOM | 6128 | 2HH2 | ARG | 408 | 35.166 | 96.329 | 77.280 | 0.00 | 0.00 |
| ATOM | 6129 | C    | ARG | 408 | 43.248 | 94.672 | 74.976 | 0.00 | 0.00 |
| ATOM | 6130 | O    | ARG | 408 | 43.399 | 94.079 | 73.875 | 0.00 | 0.00 |
| ATOM | 6131 | N    | GLU | 409 | 44.199 | 95.493 | 75.448 | 0.00 | 0.00 |
| ATOM | 6132 | H    | GLU | 409 | 44.022 | 95.961 | 76.325 | 0.00 | 0.00 |
| ATOM | 6133 | CA   | GLU | 409 | 45.412 | 95.767 | 74.694 | 0.00 | 0.00 |
| ATOM | 6134 | HA   | GLU | 409 | 45.240 | 95.856 | 73.621 | 0.00 | 0.00 |
| ATOM | 6135 | CB   | GLU | 409 | 46.050 | 96.965 | 75.318 | 0.00 | 0.00 |

|      |      |      |     |     |        |        |        |      |      |
|------|------|------|-----|-----|--------|--------|--------|------|------|
| ATOM | 6136 | HB2  | GLU | 409 | 45.327 | 97.614 | 75.811 | 0.00 | 0.00 |
| ATOM | 6137 | HB3  | GLU | 409 | 46.814 | 96.535 | 75.966 | 0.00 | 0.00 |
| ATOM | 6138 | CG   | GLU | 409 | 46.801 | 97.616 | 74.117 | 0.00 | 0.00 |
| ATOM | 6139 | HG2  | GLU | 409 | 47.641 | 98.170 | 74.536 | 0.00 | 0.00 |
| ATOM | 6140 | HG3  | GLU | 409 | 47.326 | 97.019 | 73.371 | 0.00 | 0.00 |
| ATOM | 6141 | CD   | GLU | 409 | 45.845 | 98.610 | 73.473 | 0.00 | 0.00 |
| ATOM | 6142 | OE1  | GLU | 409 | 45.630 | 99.679 | 74.126 | 0.00 | 0.00 |
| ATOM | 6143 | OE2  | GLU | 409 | 45.376 | 98.347 | 72.366 | 0.00 | 0.00 |
| ATOM | 6144 | C    | GLU | 409 | 46.360 | 94.521 | 74.891 | 0.00 | 0.00 |
| ATOM | 6145 | O    | GLU | 409 | 46.996 | 94.122 | 73.923 | 0.00 | 0.00 |
| ATOM | 6146 | N    | GLN | 410 | 46.385 | 93.758 | 76.016 | 0.00 | 0.00 |
| ATOM | 6147 | H    | GLN | 410 | 45.712 | 94.003 | 76.728 | 0.00 | 0.00 |
| ATOM | 6148 | CA   | GLN | 410 | 47.073 | 92.435 | 76.111 | 0.00 | 0.00 |
| ATOM | 6149 | HA   | GLN | 410 | 48.090 | 92.514 | 75.727 | 0.00 | 0.00 |
| ATOM | 6150 | CB   | GLN | 410 | 47.187 | 92.153 | 77.597 | 0.00 | 0.00 |
| ATOM | 6151 | HB2  | GLN | 410 | 46.225 | 92.317 | 78.083 | 0.00 | 0.00 |
| ATOM | 6152 | HB3  | GLN | 410 | 47.623 | 91.192 | 77.869 | 0.00 | 0.00 |
| ATOM | 6153 | CG   | GLN | 410 | 48.221 | 93.158 | 78.169 | 0.00 | 0.00 |
| ATOM | 6154 | HG2  | GLN | 410 | 49.224 | 93.006 | 77.771 | 0.00 | 0.00 |
| ATOM | 6155 | HG3  | GLN | 410 | 47.956 | 94.172 | 77.870 | 0.00 | 0.00 |
| ATOM | 6156 | CD   | GLN | 410 | 48.382 | 92.999 | 79.674 | 0.00 | 0.00 |
| ATOM | 6157 | OE1  | GLN | 410 | 49.309 | 92.431 | 80.174 | 0.00 | 0.00 |
| ATOM | 6158 | NE2  | GLN | 410 | 47.495 | 93.586 | 80.448 | 0.00 | 0.00 |
| ATOM | 6159 | 1HE2 | GLN | 410 | 47.285 | 93.338 | 81.404 | 0.00 | 0.00 |
| ATOM | 6160 | 2HE2 | GLN | 410 | 46.866 | 94.242 | 80.007 | 0.00 | 0.00 |
| ATOM | 6161 | C    | GLN | 410 | 46.243 | 91.358 | 75.396 | 0.00 | 0.00 |



|      |      |      |     |     |        |        |        |      |      |
|------|------|------|-----|-----|--------|--------|--------|------|------|
| ATOM | 6162 | O    | GLN | 410 | 46.878 | 90.669 | 74.561 | 0.00 | 0.00 |
| ATOM | 6163 | N    | VAL | 411 | 44.912 | 91.244 | 75.498 | 0.00 | 0.00 |
| ATOM | 6164 | H    | VAL | 411 | 44.458 | 91.935 | 76.077 | 0.00 | 0.00 |
| ATOM | 6165 | CA   | VAL | 411 | 44.182 | 90.120 | 74.878 | 0.00 | 0.00 |
| ATOM | 6166 | HA   | VAL | 411 | 44.588 | 89.185 | 75.264 | 0.00 | 0.00 |
| ATOM | 6167 | CB   | VAL | 411 | 42.648 | 90.159 | 75.276 | 0.00 | 0.00 |
| ATOM | 6168 | HB   | VAL | 411 | 42.316 | 91.175 | 75.063 | 0.00 | 0.00 |
| ATOM | 6169 | CG1  | VAL | 411 | 41.869 | 89.060 | 74.605 | 0.00 | 0.00 |
| ATOM | 6170 | 1HG1 | VAL | 411 | 41.710 | 89.274 | 73.548 | 0.00 | 0.00 |
| ATOM | 6171 | 2HG1 | VAL | 411 | 42.457 | 88.147 | 74.700 | 0.00 | 0.00 |
| ATOM | 6172 | 3HG1 | VAL | 411 | 40.901 | 88.999 | 75.102 | 0.00 | 0.00 |
| ATOM | 6173 | CG2  | VAL | 411 | 42.404 | 89.887 | 76.748 | 0.00 | 0.00 |
| ATOM | 6174 | 1HG2 | VAL | 411 | 42.680 | 88.846 | 76.919 | 0.00 | 0.00 |
| ATOM | 6175 | 2HG2 | VAL | 411 | 42.946 | 90.587 | 77.384 | 0.00 | 0.00 |
| ATOM | 6176 | 3HG2 | VAL | 411 | 41.362 | 90.007 | 77.046 | 0.00 | 0.00 |
| ATOM | 6177 | C    | VAL | 411 | 44.307 | 90.157 | 73.387 | 0.00 | 0.00 |
| ATOM | 6178 | O    | VAL | 411 | 44.693 | 89.071 | 72.876 | 0.00 | 0.00 |
| ATOM | 6179 | N    | ALA | 412 | 44.153 | 91.278 | 72.650 | 0.00 | 0.00 |
| ATOM | 6180 | H    | ALA | 412 | 43.868 | 92.076 | 73.200 | 0.00 | 0.00 |
| ATOM | 6181 | CA   | ALA | 412 | 44.386 | 91.208 | 71.222 | 0.00 | 0.00 |
| ATOM | 6182 | HA   | ALA | 412 | 43.972 | 90.264 | 70.869 | 0.00 | 0.00 |
| ATOM | 6183 | CB   | ALA | 412 | 43.591 | 92.343 | 70.572 | 0.00 | 0.00 |
| ATOM | 6184 | HB1  | ALA | 412 | 43.603 | 92.250 | 69.486 | 0.00 | 0.00 |
| ATOM | 6185 | HB2  | ALA | 412 | 42.546 | 92.380 | 70.879 | 0.00 | 0.00 |
| ATOM | 6186 | HB3  | ALA | 412 | 43.928 | 93.347 | 70.833 | 0.00 | 0.00 |
| ATOM | 6187 | C    | ALA | 412 | 45.894 | 91.362 | 70.766 | 0.00 | 0.00 |

|      |      |      |     |     |        |        |        |      |      |
|------|------|------|-----|-----|--------|--------|--------|------|------|
| ATOM | 6188 | O    | ALA | 412 | 46.137 | 91.482 | 69.550 | 0.00 | 0.00 |
| ATOM | 6189 | N    | ALA | 413 | 46.867 | 91.285 | 71.650 | 0.00 | 0.00 |
| ATOM | 6190 | H    | ALA | 413 | 46.645 | 91.180 | 72.630 | 0.00 | 0.00 |
| ATOM | 6191 | CA   | ALA | 413 | 48.249 | 90.963 | 71.318 | 0.00 | 0.00 |
| ATOM | 6192 | HA   | ALA | 413 | 48.327 | 91.268 | 70.274 | 0.00 | 0.00 |
| ATOM | 6193 | CB   | ALA | 413 | 49.188 | 91.846 | 72.241 | 0.00 | 0.00 |
| ATOM | 6194 | HB1  | ALA | 413 | 49.637 | 92.631 | 71.633 | 0.00 | 0.00 |
| ATOM | 6195 | HB2  | ALA | 413 | 48.685 | 92.147 | 73.160 | 0.00 | 0.00 |
| ATOM | 6196 | HB3  | ALA | 413 | 50.115 | 91.323 | 72.474 | 0.00 | 0.00 |
| ATOM | 6197 | C    | ALA | 413 | 48.529 | 89.372 | 71.256 | 0.00 | 0.00 |
| ATOM | 6198 | O    | ALA | 413 | 49.451 | 88.946 | 70.549 | 0.00 | 0.00 |
| ATOM | 6199 | N    | GLY | 414 | 47.661 | 88.608 | 71.891 | 0.00 | 0.00 |
| ATOM | 6200 | H    | GLY | 414 | 47.001 | 89.024 | 72.533 | 0.00 | 0.00 |
| ATOM | 6201 | CA   | GLY | 414 | 47.785 | 87.135 | 71.799 | 0.00 | 0.00 |
| ATOM | 6202 | HA2  | GLY | 414 | 47.243 | 86.821 | 70.907 | 0.00 | 0.00 |
| ATOM | 6203 | HA3  | GLY | 414 | 48.799 | 86.741 | 71.723 | 0.00 | 0.00 |
| ATOM | 6204 | C    | GLY | 414 | 47.181 | 86.330 | 72.998 | 0.00 | 0.00 |
| ATOM | 6205 | O    | GLY | 414 | 46.905 | 85.183 | 72.851 | 0.00 | 0.00 |
| ATOM | 6206 | N    | VAL | 415 | 47.008 | 86.940 | 74.159 | 0.00 | 0.00 |
| ATOM | 6207 | H    | VAL | 415 | 47.286 | 87.905 | 74.266 | 0.00 | 0.00 |
| ATOM | 6208 | CA   | VAL | 415 | 46.833 | 86.195 | 75.500 | 0.00 | 0.00 |
| ATOM | 6209 | HA   | VAL | 415 | 47.550 | 85.375 | 75.503 | 0.00 | 0.00 |
| ATOM | 6210 | CB   | VAL | 415 | 47.219 | 86.958 | 76.719 | 0.00 | 0.00 |
| ATOM | 6211 | HB   | VAL | 415 | 46.995 | 86.315 | 77.571 | 0.00 | 0.00 |
| ATOM | 6212 | CG1  | VAL | 415 | 48.732 | 87.288 | 76.847 | 0.00 | 0.00 |
| ATOM | 6213 | 1HG1 | VAL | 415 | 48.984 | 87.837 | 75.940 | 0.00 | 0.00 |

|      |      |      |     |     |        |        |        |      |      |
|------|------|------|-----|-----|--------|--------|--------|------|------|
| ATOM | 6214 | 2HG1 | VAL | 415 | 48.978 | 88.000 | 77.634 | 0.00 | 0.00 |
| ATOM | 6215 | 3HG1 | VAL | 415 | 49.344 | 86.386 | 76.873 | 0.00 | 0.00 |
| ATOM | 6216 | CG2  | VAL | 415 | 46.457 | 88.247 | 77.047 | 0.00 | 0.00 |
| ATOM | 6217 | 1HG2 | VAL | 415 | 46.535 | 88.902 | 76.179 | 0.00 | 0.00 |
| ATOM | 6218 | 2HG2 | VAL | 415 | 45.390 | 88.039 | 77.127 | 0.00 | 0.00 |
| ATOM | 6219 | 3HG2 | VAL | 415 | 46.753 | 88.662 | 78.011 | 0.00 | 0.00 |
| ATOM | 6220 | C    | VAL | 415 | 45.490 | 85.543 | 75.649 | 0.00 | 0.00 |
| ATOM | 6221 | O    | VAL | 415 | 44.490 | 86.274 | 75.374 | 0.00 | 0.00 |
| ATOM | 6222 | N    | ILE | 416 | 45.440 | 84.278 | 76.008 | 0.00 | 0.00 |
| ATOM | 6223 | H    | ILE | 416 | 46.334 | 83.877 | 76.253 | 0.00 | 0.00 |
| ATOM | 6224 | CA   | ILE | 416 | 44.151 | 83.466 | 76.121 | 0.00 | 0.00 |
| ATOM | 6225 | HA   | ILE | 416 | 43.515 | 83.774 | 75.291 | 0.00 | 0.00 |
| ATOM | 6226 | CB   | ILE | 416 | 44.489 | 81.982 | 75.794 | 0.00 | 0.00 |
| ATOM | 6227 | HB   | ILE | 416 | 43.683 | 81.339 | 76.146 | 0.00 | 0.00 |
| ATOM | 6228 | CG2  | ILE | 416 | 44.687 | 81.898 | 74.324 | 0.00 | 0.00 |
| ATOM | 6229 | 1HG2 | ILE | 416 | 45.213 | 80.978 | 74.069 | 0.00 | 0.00 |
| ATOM | 6230 | 2HG2 | ILE | 416 | 43.769 | 81.960 | 73.741 | 0.00 | 0.00 |
| ATOM | 6231 | 3HG2 | ILE | 416 | 45.375 | 82.701 | 74.057 | 0.00 | 0.00 |
| ATOM | 6232 | CG1  | ILE | 416 | 45.660 | 81.396 | 76.650 | 0.00 | 0.00 |
| ATOM | 6233 | 2HG1 | ILE | 416 | 46.525 | 82.004 | 76.385 | 0.00 | 0.00 |
| ATOM | 6234 | 3HG1 | ILE | 416 | 45.512 | 81.551 | 77.719 | 0.00 | 0.00 |
| ATOM | 6235 | CD1  | ILE | 416 | 45.953 | 79.927 | 76.527 | 0.00 | 0.00 |
| ATOM | 6236 | 1HD1 | ILE | 416 | 45.153 | 79.328 | 76.963 | 0.00 | 0.00 |
| ATOM | 6237 | 2HD1 | ILE | 416 | 46.168 | 79.643 | 75.497 | 0.00 | 0.00 |
| ATOM | 6238 | 3HD1 | ILE | 416 | 46.860 | 79.842 | 77.127 | 0.00 | 0.00 |
| ATOM | 6239 | C    | ILE | 416 | 43.547 | 83.603 | 77.489 | 0.00 | 0.00 |

ATOM 6240 O ILE 416 42.620 82.846 77.884 0.00 0.00  
ATOM 6241 N GLY 417 44.086 84.508 78.320 0.00 0.00  
ATOM 6242 H GLY 417 44.909 85.034 78.064 0.00 0.00  
ATOM 6243 CA GLY 417 43.613 84.560 79.650 0.00 0.00  
ATOM 6244 HA2 GLY 417 42.553 84.810 79.633 0.00 0.00  
ATOM 6245 HA3 GLY 417 43.741 83.570 80.088 0.00 0.00  
ATOM 6246 C GLY 417 44.394 85.566 80.542 0.00 0.00  
ATOM 6247 O GLY 417 45.271 86.262 79.997 0.00 0.00  
ATOM 6248 N LEU 418 44.170 85.588 81.841 0.00 0.00  
ATOM 6249 H LEU 418 43.443 85.043 82.281 0.00 0.00  
ATOM 6250 CA LEU 418 44.740 86.609 82.751 0.00 0.00  
ATOM 6251 HA LEU 418 45.662 87.029 82.347 0.00 0.00  
ATOM 6252 CB LEU 418 43.799 87.714 82.932 0.00 0.00  
ATOM 6253 HB2 LEU 418 42.893 87.283 83.358 0.00 0.00  
ATOM 6254 HB3 LEU 418 44.128 88.401 83.711 0.00 0.00  
ATOM 6255 CG LEU 418 43.534 88.607 81.726 0.00 0.00  
ATOM 6256 HG LEU 418 43.248 87.910 80.938 0.00 0.00  
ATOM 6257 CD1 LEU 418 42.371 89.583 81.929 0.00 0.00  
ATOM 6258 1HD1 LEU 418 42.691 90.201 82.768 0.00 0.00  
ATOM 6259 2HD1 LEU 418 42.145 90.107 81.001 0.00 0.00  
ATOM 6260 3HD1 LEU 418 41.492 88.969 82.124 0.00 0.00  
ATOM 6261 CD2 LEU 418 44.719 89.357 81.117 0.00 0.00  
ATOM 6262 1HD2 LEU 418 45.113 89.966 81.931 0.00 0.00  
ATOM 6263 2HD2 LEU 418 45.267 88.610 80.544 0.00 0.00  
ATOM 6264 3HD2 LEU 418 44.405 90.078 80.363 0.00 0.00  
ATOM 6265 C LEU 418 45.183 85.815 84.081 0.00 0.00

|      |      |     |     |     |        |        |        |      |      |
|------|------|-----|-----|-----|--------|--------|--------|------|------|
| ATOM | 6266 | O   | LEU | 418 | 44.584 | 84.867 | 84.584 | 0.00 | 0.00 |
| ATOM | 6267 | N   | KCB | 419 | 46.124 | 86.432 | 84.724 | 0.00 | 0.00 |
| ATOM | 6268 | H   | KCB | 419 | 46.744 | 87.031 | 84.196 | 0.00 | 0.00 |
| ATOM | 6269 | CA  | KCB | 419 | 46.446 | 86.142 | 86.190 | 0.00 | 0.00 |
| ATOM | 6270 | HA  | KCB | 419 | 45.666 | 85.458 | 86.525 | 0.00 | 0.00 |
| ATOM | 6271 | CB  | KCB | 419 | 47.801 | 85.368 | 86.388 | 0.00 | 0.00 |
| ATOM | 6272 | HB2 | KCB | 419 | 47.679 | 84.435 | 85.839 | 0.00 | 0.00 |
| ATOM | 6273 | HB3 | KCB | 419 | 48.666 | 85.923 | 86.025 | 0.00 | 0.00 |
| ATOM | 6274 | CG  | KCB | 419 | 47.956 | 85.016 | 87.870 | 0.00 | 0.00 |
| ATOM | 6275 | HG2 | KCB | 419 | 48.036 | 85.963 | 88.402 | 0.00 | 0.00 |
| ATOM | 6276 | HG3 | KCB | 419 | 47.115 | 84.376 | 88.138 | 0.00 | 0.00 |
| ATOM | 6277 | CD  | KCB | 419 | 49.299 | 84.306 | 88.112 | 0.00 | 0.00 |
| ATOM | 6278 | HD2 | KCB | 419 | 49.426 | 83.477 | 87.415 | 0.00 | 0.00 |
| ATOM | 6279 | HD3 | KCB | 419 | 49.924 | 85.149 | 87.817 | 0.00 | 0.00 |
| ATOM | 6280 | CE  | KCB | 419 | 49.500 | 83.936 | 89.616 | 0.00 | 0.00 |
| ATOM | 6281 | HE2 | KCB | 419 | 49.306 | 84.736 | 90.330 | 0.00 | 0.00 |
| ATOM | 6282 | HE3 | KCB | 419 | 48.752 | 83.211 | 89.939 | 0.00 | 0.00 |
| ATOM | 6283 | NZ  | KCB | 419 | 50.833 | 83.488 | 89.751 | 0.00 | 0.00 |
| ATOM | 6284 | HZ1 | KCB | 419 | 51.316 | 83.346 | 88.876 | 0.00 | 0.00 |
| ATOM | 6285 | CX  | KCB | 419 | 51.355 | 83.125 | 90.914 | 0.00 | 0.00 |
| ATOM | 6286 | OX1 | KCB | 419 | 50.609 | 82.936 | 91.865 | 0.00 | 0.00 |
| ATOM | 6287 | OX2 | KCB | 419 | 52.586 | 82.974 | 90.820 | 0.00 | 0.00 |
| ATOM | 6288 | C   | KCB | 419 | 46.429 | 87.467 | 86.966 | 0.00 | 0.00 |
| ATOM | 6289 | O   | KCB | 419 | 46.666 | 88.548 | 86.444 | 0.00 | 0.00 |
| ATOM | 6290 | N   | ILE | 420 | 45.840 | 87.389 | 88.119 | 0.00 | 0.00 |
| ATOM | 6291 | H   | ILE | 420 | 45.447 | 86.503 | 88.403 | 0.00 | 0.00 |

|      |      |      |     |     |        |        |        |      |      |
|------|------|------|-----|-----|--------|--------|--------|------|------|
| ATOM | 6292 | CA   | ILE | 420 | 45.974 | 88.446 | 89.180 | 0.00 | 0.00 |
| ATOM | 6293 | HA   | ILE | 420 | 46.504 | 89.312 | 88.785 | 0.00 | 0.00 |
| ATOM | 6294 | CB   | ILE | 420 | 44.555 | 88.826 | 89.641 | 0.00 | 0.00 |
| ATOM | 6295 | HB   | ILE | 420 | 44.000 | 87.899 | 89.791 | 0.00 | 0.00 |
| ATOM | 6296 | CG2  | ILE | 420 | 44.703 | 89.519 | 91.027 | 0.00 | 0.00 |
| ATOM | 6297 | 1HG2 | ILE | 420 | 43.743 | 89.573 | 91.540 | 0.00 | 0.00 |
| ATOM | 6298 | 2HG2 | ILE | 420 | 45.300 | 88.986 | 91.766 | 0.00 | 0.00 |
| ATOM | 6299 | 3HG2 | ILE | 420 | 45.195 | 90.488 | 90.945 | 0.00 | 0.00 |
| ATOM | 6300 | CG1  | ILE | 420 | 43.817 | 89.829 | 88.685 | 0.00 | 0.00 |
| ATOM | 6301 | 2HG1 | ILE | 420 | 44.447 | 90.700 | 88.505 | 0.00 | 0.00 |
| ATOM | 6302 | 3HG1 | ILE | 420 | 43.723 | 89.320 | 87.726 | 0.00 | 0.00 |
| ATOM | 6303 | CD1  | ILE | 420 | 42.398 | 90.282 | 89.137 | 0.00 | 0.00 |
| ATOM | 6304 | 1HD1 | ILE | 420 | 42.507 | 90.866 | 90.051 | 0.00 | 0.00 |
| ATOM | 6305 | 2HD1 | ILE | 420 | 41.987 | 91.025 | 88.453 | 0.00 | 0.00 |
| ATOM | 6306 | 3HD1 | ILE | 420 | 41.792 | 89.382 | 89.233 | 0.00 | 0.00 |
| ATOM | 6307 | C    | ILE | 420 | 46.880 | 87.853 | 90.211 | 0.00 | 0.00 |
| ATOM | 6308 | O    | ILE | 420 | 46.626 | 86.665 | 90.655 | 0.00 | 0.00 |
| ATOM | 6309 | N    | HIE | 421 | 47.885 | 88.574 | 90.638 | 0.00 | 0.00 |
| ATOM | 6310 | H    | HIE | 421 | 47.959 | 89.523 | 90.302 | 0.00 | 0.00 |
| ATOM | 6311 | CA   | HIE | 421 | 48.849 | 88.305 | 91.804 | 0.00 | 0.00 |
| ATOM | 6312 | HA   | HIE | 421 | 48.625 | 87.300 | 92.162 | 0.00 | 0.00 |
| ATOM | 6313 | CB   | HIE | 421 | 50.228 | 88.240 | 91.262 | 0.00 | 0.00 |
| ATOM | 6314 | HB2  | HIE | 421 | 50.207 | 87.656 | 90.342 | 0.00 | 0.00 |
| ATOM | 6315 | HB3  | HIE | 421 | 50.611 | 89.218 | 90.970 | 0.00 | 0.00 |
| ATOM | 6316 | CG   | HIE | 421 | 51.153 | 87.655 | 92.272 | 0.00 | 0.00 |
| ATOM | 6317 | ND1  | HIE | 421 | 52.128 | 88.274 | 93.050 | 0.00 | 0.00 |

|      |      |     |     |     |        |        |        |      |      |
|------|------|-----|-----|-----|--------|--------|--------|------|------|
| ATOM | 6318 | CE1 | HIE | 421 | 52.788 | 87.352 | 93.801 | 0.00 | 0.00 |
| ATOM | 6319 | HE1 | HIE | 421 | 53.628 | 87.446 | 94.473 | 0.00 | 0.00 |
| ATOM | 6320 | NE2 | HIE | 421 | 52.411 | 86.149 | 93.286 | 0.00 | 0.00 |
| ATOM | 6321 | HE2 | HIE | 421 | 52.886 | 85.271 | 93.445 | 0.00 | 0.00 |
| ATOM | 6322 | CD2 | HIE | 421 | 51.332 | 86.308 | 92.487 | 0.00 | 0.00 |
| ATOM | 6323 | HD2 | HIE | 421 | 50.862 | 85.508 | 91.934 | 0.00 | 0.00 |
| ATOM | 6324 | C   | HIE | 421 | 48.739 | 89.333 | 92.940 | 0.00 | 0.00 |
| ATOM | 6325 | O   | HIE | 421 | 48.152 | 90.391 | 92.699 | 0.00 | 0.00 |
| ATOM | 6326 | N   | GLU | 422 | 49.273 | 88.968 | 94.104 | 0.00 | 0.00 |
| ATOM | 6327 | H   | GLU | 422 | 49.640 | 88.030 | 94.183 | 0.00 | 0.00 |
| ATOM | 6328 | CA  | GLU | 422 | 49.248 | 89.888 | 95.223 | 0.00 | 0.00 |
| ATOM | 6329 | HA  | GLU | 422 | 48.332 | 90.476 | 95.161 | 0.00 | 0.00 |
| ATOM | 6330 | CB  | GLU | 422 | 49.302 | 89.145 | 96.544 | 0.00 | 0.00 |
| ATOM | 6331 | HB2 | GLU | 422 | 49.028 | 89.718 | 97.429 | 0.00 | 0.00 |
| ATOM | 6332 | HB3 | GLU | 422 | 48.477 | 88.439 | 96.453 | 0.00 | 0.00 |
| ATOM | 6333 | CG  | GLU | 422 | 50.613 | 88.394 | 96.805 | 0.00 | 0.00 |
| ATOM | 6334 | HG2 | GLU | 422 | 50.646 | 87.573 | 96.088 | 0.00 | 0.00 |
| ATOM | 6335 | HG3 | GLU | 422 | 51.522 | 88.940 | 96.554 | 0.00 | 0.00 |
| ATOM | 6336 | CD  | GLU | 422 | 50.753 | 87.932 | 98.251 | 0.00 | 0.00 |
| ATOM | 6337 | OE1 | GLU | 422 | 50.575 | 88.709 | 99.209 | 0.00 | 0.00 |
| ATOM | 6338 | OE2 | GLU | 422 | 51.042 | 86.743 | 98.534 | 0.00 | 0.00 |
| ATOM | 6339 | C   | GLU | 422 | 50.321 | 90.993 | 95.154 | 0.00 | 0.00 |
| ATOM | 6340 | O   | GLU | 422 | 50.131 | 92.052 | 95.743 | 0.00 | 0.00 |
| ATOM | 6341 | N   | ASP | 423 | 51.433 | 90.710 | 94.492 | 0.00 | 0.00 |
| ATOM | 6342 | H   | ASP | 423 | 51.622 | 89.722 | 94.404 | 0.00 | 0.00 |
| ATOM | 6343 | CA  | ASP | 423 | 52.548 | 91.648 | 94.629 | 0.00 | 0.00 |

|      |      |     |     |     |        |        |        |      |      |
|------|------|-----|-----|-----|--------|--------|--------|------|------|
| ATOM | 6344 | HA  | ASP | 423 | 52.482 | 92.069 | 95.632 | 0.00 | 0.00 |
| ATOM | 6345 | CB  | ASP | 423 | 53.840 | 90.849 | 94.422 | 0.00 | 0.00 |
| ATOM | 6346 | HB2 | ASP | 423 | 53.682 | 90.139 | 93.611 | 0.00 | 0.00 |
| ATOM | 6347 | HB3 | ASP | 423 | 54.655 | 91.534 | 94.186 | 0.00 | 0.00 |
| ATOM | 6348 | CG  | ASP | 423 | 54.293 | 90.116 | 95.643 | 0.00 | 0.00 |
| ATOM | 6349 | OD1 | ASP | 423 | 53.603 | 90.071 | 96.704 | 0.00 | 0.00 |
| ATOM | 6350 | OD2 | ASP | 423 | 55.244 | 89.400 | 95.432 | 0.00 | 0.00 |
| ATOM | 6351 | C   | ASP | 423 | 52.436 | 92.713 | 93.520 | 0.00 | 0.00 |
| ATOM | 6352 | O   | ASP | 423 | 52.779 | 93.831 | 93.870 | 0.00 | 0.00 |
| ATOM | 6353 | N   | TRP | 424 | 51.781 | 92.514 | 92.299 | 0.00 | 0.00 |
| ATOM | 6354 | H   | TRP | 424 | 51.381 | 91.595 | 92.173 | 0.00 | 0.00 |
| ATOM | 6355 | CA  | TRP | 424 | 51.400 | 93.586 | 91.383 | 0.00 | 0.00 |
| ATOM | 6356 | HA  | TRP | 424 | 52.167 | 94.353 | 91.276 | 0.00 | 0.00 |
| ATOM | 6357 | CB  | TRP | 424 | 51.186 | 93.013 | 89.945 | 0.00 | 0.00 |
| ATOM | 6358 | HB2 | TRP | 424 | 50.557 | 92.133 | 90.076 | 0.00 | 0.00 |
| ATOM | 6359 | HB3 | TRP | 424 | 50.732 | 93.824 | 89.375 | 0.00 | 0.00 |
| ATOM | 6360 | CG  | TRP | 424 | 52.350 | 92.614 | 89.124 | 0.00 | 0.00 |
| ATOM | 6361 | CD1 | TRP | 424 | 52.433 | 91.430 | 88.523 | 0.00 | 0.00 |
| ATOM | 6362 | HD1 | TRP | 424 | 51.749 | 90.607 | 88.669 | 0.00 | 0.00 |
| ATOM | 6363 | NE1 | TRP | 424 | 53.559 | 91.413 | 87.672 | 0.00 | 0.00 |
| ATOM | 6364 | HE1 | TRP | 424 | 53.954 | 90.532 | 87.375 | 0.00 | 0.00 |
| ATOM | 6365 | CE2 | TRP | 424 | 54.133 | 92.655 | 87.566 | 0.00 | 0.00 |
| ATOM | 6366 | CZ2 | TRP | 424 | 55.157 | 93.104 | 86.794 | 0.00 | 0.00 |
| ATOM | 6367 | HZ2 | TRP | 424 | 55.741 | 92.486 | 86.129 | 0.00 | 0.00 |
| ATOM | 6368 | CH2 | TRP | 424 | 55.634 | 94.428 | 86.929 | 0.00 | 0.00 |
| ATOM | 6369 | HH2 | TRP | 424 | 56.491 | 94.668 | 86.317 | 0.00 | 0.00 |



|      |      |     |     |     |        |        |        |      |      |
|------|------|-----|-----|-----|--------|--------|--------|------|------|
| ATOM | 6370 | CZ3 | TRP | 424 | 54.835 | 95.340 | 87.703 | 0.00 | 0.00 |
| ATOM | 6371 | HZ3 | TRP | 424 | 55.296 | 96.317 | 87.694 | 0.00 | 0.00 |
| ATOM | 6372 | CE3 | TRP | 424 | 53.767 | 94.864 | 88.466 | 0.00 | 0.00 |
| ATOM | 6373 | HE3 | TRP | 424 | 53.411 | 95.573 | 89.198 | 0.00 | 0.00 |
| ATOM | 6374 | CD2 | TRP | 424 | 53.402 | 93.440 | 88.507 | 0.00 | 0.00 |
| ATOM | 6375 | C   | TRP | 424 | 50.049 | 94.261 | 91.858 | 0.00 | 0.00 |
| ATOM | 6376 | O   | TRP | 424 | 49.576 | 95.122 | 91.123 | 0.00 | 0.00 |
| ATOM | 6377 | N   | GLY | 425 | 49.380 | 93.861 | 92.976 | 0.00 | 0.00 |
| ATOM | 6378 | H   | GLY | 425 | 49.686 | 93.073 | 93.528 | 0.00 | 0.00 |
| ATOM | 6379 | CA  | GLY | 425 | 48.186 | 94.513 | 93.483 | 0.00 | 0.00 |
| ATOM | 6380 | HA2 | GLY | 425 | 48.375 | 94.620 | 94.551 | 0.00 | 0.00 |
| ATOM | 6381 | HA3 | GLY | 425 | 48.042 | 95.545 | 93.162 | 0.00 | 0.00 |
| ATOM | 6382 | C   | GLY | 425 | 46.811 | 93.845 | 93.343 | 0.00 | 0.00 |
| ATOM | 6383 | O   | GLY | 425 | 46.285 | 93.983 | 92.237 | 0.00 | 0.00 |
| ATOM | 6384 | N   | ALA | 426 | 46.307 | 93.062 | 94.240 | 0.00 | 0.00 |
| ATOM | 6385 | H   | ALA | 426 | 46.799 | 93.075 | 95.122 | 0.00 | 0.00 |
| ATOM | 6386 | CA  | ALA | 426 | 45.195 | 92.184 | 93.903 | 0.00 | 0.00 |
| ATOM | 6387 | HA  | ALA | 426 | 45.192 | 92.105 | 92.816 | 0.00 | 0.00 |
| ATOM | 6388 | CB  | ALA | 426 | 45.430 | 90.798 | 94.525 | 0.00 | 0.00 |
| ATOM | 6389 | HB1 | ALA | 426 | 46.239 | 90.388 | 93.921 | 0.00 | 0.00 |
| ATOM | 6390 | HB2 | ALA | 426 | 45.762 | 90.717 | 95.560 | 0.00 | 0.00 |
| ATOM | 6391 | HB3 | ALA | 426 | 44.593 | 90.110 | 94.406 | 0.00 | 0.00 |
| ATOM | 6392 | C   | ALA | 426 | 43.814 | 92.784 | 94.325 | 0.00 | 0.00 |
| ATOM | 6393 | O   | ALA | 426 | 43.121 | 92.078 | 95.004 | 0.00 | 0.00 |
| ATOM | 6394 | N   | THR | 427 | 43.470 | 94.049 | 93.992 | 0.00 | 0.00 |
| ATOM | 6395 | H   | THR | 427 | 43.883 | 94.409 | 93.144 | 0.00 | 0.00 |

|      |      |      |     |     |        |        |        |      |      |
|------|------|------|-----|-----|--------|--------|--------|------|------|
| ATOM | 6396 | CA   | THR | 427 | 42.371 | 94.772 | 94.628 | 0.00 | 0.00 |
| ATOM | 6397 | HA   | THR | 427 | 42.343 | 94.425 | 95.661 | 0.00 | 0.00 |
| ATOM | 6398 | CB   | THR | 427 | 42.653 | 96.301 | 94.587 | 0.00 | 0.00 |
| ATOM | 6399 | HB   | THR | 427 | 41.934 | 96.997 | 95.021 | 0.00 | 0.00 |
| ATOM | 6400 | CG2  | THR | 427 | 44.004 | 96.710 | 95.065 | 0.00 | 0.00 |
| ATOM | 6401 | 1HG2 | THR | 427 | 44.011 | 97.744 | 95.410 | 0.00 | 0.00 |
| ATOM | 6402 | 2HG2 | THR | 427 | 44.323 | 96.007 | 95.834 | 0.00 | 0.00 |
| ATOM | 6403 | 3HG2 | THR | 427 | 44.796 | 96.609 | 94.323 | 0.00 | 0.00 |
| ATOM | 6404 | OG1  | THR | 427 | 42.696 | 96.699 | 93.190 | 0.00 | 0.00 |
| ATOM | 6405 | HG1  | THR | 427 | 42.838 | 97.640 | 93.066 | 0.00 | 0.00 |
| ATOM | 6406 | C    | THR | 427 | 41.025 | 94.375 | 94.026 | 0.00 | 0.00 |
| ATOM | 6407 | O    | THR | 427 | 40.994 | 93.879 | 92.920 | 0.00 | 0.00 |
| ATOM | 6408 | N    | PRO | 428 | 39.863 | 94.710 | 94.651 | 0.00 | 0.00 |
| ATOM | 6409 | CD   | PRO | 428 | 39.739 | 95.082 | 96.066 | 0.00 | 0.00 |
| ATOM | 6410 | HD2  | PRO | 428 | 40.378 | 94.598 | 96.805 | 0.00 | 0.00 |
| ATOM | 6411 | HD3  | PRO | 428 | 39.947 | 96.147 | 96.170 | 0.00 | 0.00 |
| ATOM | 6412 | CG   | PRO | 428 | 38.247 | 94.839 | 96.399 | 0.00 | 0.00 |
| ATOM | 6413 | HG2  | PRO | 428 | 38.233 | 93.799 | 96.723 | 0.00 | 0.00 |
| ATOM | 6414 | HG3  | PRO | 428 | 37.774 | 95.325 | 97.252 | 0.00 | 0.00 |
| ATOM | 6415 | CB   | PRO | 428 | 37.439 | 94.995 | 95.159 | 0.00 | 0.00 |
| ATOM | 6416 | HB2  | PRO | 428 | 36.480 | 94.498 | 95.013 | 0.00 | 0.00 |
| ATOM | 6417 | HB3  | PRO | 428 | 37.142 | 96.012 | 94.906 | 0.00 | 0.00 |
| ATOM | 6418 | CA   | PRO | 428 | 38.468 | 94.510 | 94.074 | 0.00 | 0.00 |
| ATOM | 6419 | HA   | PRO | 428 | 38.258 | 93.459 | 93.878 | 0.00 | 0.00 |
| ATOM | 6420 | C    | PRO | 428 | 38.165 | 95.257 | 92.776 | 0.00 | 0.00 |
| ATOM | 6421 | O    | PRO | 428 | 37.486 | 94.753 | 91.881 | 0.00 | 0.00 |

|      |      |     |     |     |        |        |        |      |      |
|------|------|-----|-----|-----|--------|--------|--------|------|------|
| ATOM | 6422 | N   | ALA | 429 | 38.868 | 96.424 | 92.587 | 0.00 | 0.00 |
| ATOM | 6423 | H   | ALA | 429 | 39.396 | 96.882 | 93.315 | 0.00 | 0.00 |
| ATOM | 6424 | CA  | ALA | 429 | 38.868 | 97.157 | 91.316 | 0.00 | 0.00 |
| ATOM | 6425 | HA  | ALA | 429 | 37.858 | 97.263 | 90.919 | 0.00 | 0.00 |
| ATOM | 6426 | CB  | ALA | 429 | 39.422 | 98.567 | 91.525 | 0.00 | 0.00 |
| ATOM | 6427 | HB1 | ALA | 429 | 40.397 | 98.550 | 92.011 | 0.00 | 0.00 |
| ATOM | 6428 | HB2 | ALA | 429 | 39.541 | 99.035 | 90.548 | 0.00 | 0.00 |
| ATOM | 6429 | HB3 | ALA | 429 | 38.703 | 99.160 | 92.089 | 0.00 | 0.00 |
| ATOM | 6430 | C   | ALA | 429 | 39.593 | 96.454 | 90.230 | 0.00 | 0.00 |
| ATOM | 6431 | O   | ALA | 429 | 39.240 | 96.640 | 89.067 | 0.00 | 0.00 |
| ATOM | 6432 | N   | ALA | 430 | 40.619 | 95.639 | 90.515 | 0.00 | 0.00 |
| ATOM | 6433 | H   | ALA | 430 | 41.070 | 95.726 | 91.414 | 0.00 | 0.00 |
| ATOM | 6434 | CA  | ALA | 430 | 41.408 | 95.004 | 89.455 | 0.00 | 0.00 |
| ATOM | 6435 | HA  | ALA | 430 | 41.331 | 95.534 | 88.506 | 0.00 | 0.00 |
| ATOM | 6436 | CB  | ALA | 430 | 42.874 | 94.936 | 89.929 | 0.00 | 0.00 |
| ATOM | 6437 | HB1 | ALA | 430 | 43.385 | 94.306 | 89.201 | 0.00 | 0.00 |
| ATOM | 6438 | HB2 | ALA | 430 | 43.319 | 95.931 | 89.919 | 0.00 | 0.00 |
| ATOM | 6439 | HB3 | ALA | 430 | 42.957 | 94.493 | 90.921 | 0.00 | 0.00 |
| ATOM | 6440 | C   | ALA | 430 | 40.822 | 93.603 | 89.236 | 0.00 | 0.00 |
| ATOM | 6441 | O   | ALA | 430 | 40.628 | 93.102 | 88.174 | 0.00 | 0.00 |
| ATOM | 6442 | N   | ILE | 431 | 40.298 | 93.021 | 90.344 | 0.00 | 0.00 |
| ATOM | 6443 | H   | ILE | 431 | 40.590 | 93.420 | 91.225 | 0.00 | 0.00 |
| ATOM | 6444 | CA  | ILE | 431 | 39.503 | 91.762 | 90.359 | 0.00 | 0.00 |
| ATOM | 6445 | HA  | ILE | 431 | 40.163 | 91.070 | 89.836 | 0.00 | 0.00 |
| ATOM | 6446 | CB  | ILE | 431 | 39.245 | 91.214 | 91.789 | 0.00 | 0.00 |
| ATOM | 6447 | HB  | ILE | 431 | 38.880 | 91.983 | 92.469 | 0.00 | 0.00 |

|      |      |      |     |     |        |        |        |      |      |
|------|------|------|-----|-----|--------|--------|--------|------|------|
| ATOM | 6448 | CG2  | ILE | 431 | 38.166 | 90.108 | 91.844 | 0.00 | 0.00 |
| ATOM | 6449 | 1HG2 | ILE | 431 | 38.536 | 89.159 | 91.458 | 0.00 | 0.00 |
| ATOM | 6450 | 2HG2 | ILE | 431 | 37.897 | 89.921 | 92.883 | 0.00 | 0.00 |
| ATOM | 6451 | 3HG2 | ILE | 431 | 37.256 | 90.311 | 91.279 | 0.00 | 0.00 |
| ATOM | 6452 | CG1  | ILE | 431 | 40.559 | 90.608 | 92.378 | 0.00 | 0.00 |
| ATOM | 6453 | 2HG1 | ILE | 431 | 40.689 | 89.584 | 92.029 | 0.00 | 0.00 |
| ATOM | 6454 | 3HG1 | ILE | 431 | 41.458 | 91.157 | 92.100 | 0.00 | 0.00 |
| ATOM | 6455 | CD1  | ILE | 431 | 40.454 | 90.706 | 93.942 | 0.00 | 0.00 |
| ATOM | 6456 | 1HD1 | ILE | 431 | 40.377 | 91.745 | 94.264 | 0.00 | 0.00 |
| ATOM | 6457 | 2HD1 | ILE | 431 | 39.712 | 90.089 | 94.449 | 0.00 | 0.00 |
| ATOM | 6458 | 3HD1 | ILE | 431 | 41.369 | 90.327 | 94.397 | 0.00 | 0.00 |
| ATOM | 6459 | C    | ILE | 431 | 38.259 | 91.779 | 89.492 | 0.00 | 0.00 |
| ATOM | 6460 | O    | ILE | 431 | 38.154 | 90.907 | 88.630 | 0.00 | 0.00 |
| ATOM | 6461 | N    | ASP | 432 | 37.404 | 92.825 | 89.639 | 0.00 | 0.00 |
| ATOM | 6462 | H    | ASP | 432 | 37.651 | 93.443 | 90.399 | 0.00 | 0.00 |
| ATOM | 6463 | CA   | ASP | 432 | 36.139 | 92.934 | 88.924 | 0.00 | 0.00 |
| ATOM | 6464 | HA   | ASP | 432 | 35.692 | 91.944 | 88.833 | 0.00 | 0.00 |
| ATOM | 6465 | CB   | ASP | 432 | 35.153 | 94.004 | 89.531 | 0.00 | 0.00 |
| ATOM | 6466 | HB2  | ASP | 432 | 34.825 | 93.809 | 90.552 | 0.00 | 0.00 |
| ATOM | 6467 | HB3  | ASP | 432 | 35.597 | 94.999 | 89.539 | 0.00 | 0.00 |
| ATOM | 6468 | CG   | ASP | 432 | 33.847 | 94.199 | 88.771 | 0.00 | 0.00 |
| ATOM | 6469 | OD1  | ASP | 432 | 33.356 | 93.174 | 88.223 | 0.00 | 0.00 |
| ATOM | 6470 | OD2  | ASP | 432 | 33.417 | 95.369 | 88.592 | 0.00 | 0.00 |
| ATOM | 6471 | C    | ASP | 432 | 36.383 | 93.309 | 87.424 | 0.00 | 0.00 |
| ATOM | 6472 | O    | ASP | 432 | 35.714 | 92.845 | 86.487 | 0.00 | 0.00 |
| ATOM | 6473 | N    | CYS | 433 | 37.497 | 94.091 | 87.188 | 0.00 | 0.00 |

|      |      |     |     |     |        |        |        |      |      |
|------|------|-----|-----|-----|--------|--------|--------|------|------|
| ATOM | 6474 | H   | CYS | 433 | 37.968 | 94.585 | 87.932 | 0.00 | 0.00 |
| ATOM | 6475 | CA  | CYS | 433 | 37.909 | 94.548 | 85.850 | 0.00 | 0.00 |
| ATOM | 6476 | HA  | CYS | 433 | 37.069 | 95.034 | 85.354 | 0.00 | 0.00 |
| ATOM | 6477 | CB  | CYS | 433 | 39.026 | 95.645 | 85.965 | 0.00 | 0.00 |
| ATOM | 6478 | HB2 | CYS | 433 | 38.689 | 96.281 | 86.783 | 0.00 | 0.00 |
| ATOM | 6479 | HB3 | CYS | 433 | 40.003 | 95.324 | 86.327 | 0.00 | 0.00 |
| ATOM | 6480 | SG  | CYS | 433 | 39.325 | 96.523 | 84.382 | 0.00 | 0.00 |
| ATOM | 6481 | HG  | CYS | 433 | 38.108 | 96.546 | 83.832 | 0.00 | 0.00 |
| ATOM | 6482 | C   | CYS | 433 | 38.309 | 93.332 | 85.059 | 0.00 | 0.00 |
| ATOM | 6483 | O   | CYS | 433 | 37.823 | 93.162 | 83.915 | 0.00 | 0.00 |
| ATOM | 6484 | N   | ALA | 434 | 39.209 | 92.481 | 85.568 | 0.00 | 0.00 |
| ATOM | 6485 | H   | ALA | 434 | 39.621 | 92.772 | 86.443 | 0.00 | 0.00 |
| ATOM | 6486 | CA  | ALA | 434 | 39.708 | 91.283 | 84.796 | 0.00 | 0.00 |
| ATOM | 6487 | HA  | ALA | 434 | 40.077 | 91.634 | 83.833 | 0.00 | 0.00 |
| ATOM | 6488 | CB  | ALA | 434 | 40.859 | 90.660 | 85.478 | 0.00 | 0.00 |
| ATOM | 6489 | HB1 | ALA | 434 | 40.502 | 90.267 | 86.431 | 0.00 | 0.00 |
| ATOM | 6490 | HB2 | ALA | 434 | 41.230 | 89.875 | 84.819 | 0.00 | 0.00 |
| ATOM | 6491 | HB3 | ALA | 434 | 41.533 | 91.498 | 85.652 | 0.00 | 0.00 |
| ATOM | 6492 | C   | ALA | 434 | 38.505 | 90.374 | 84.548 | 0.00 | 0.00 |
| ATOM | 6493 | O   | ALA | 434 | 38.404 | 89.848 | 83.438 | 0.00 | 0.00 |
| ATOM | 6494 | N   | LEU | 435 | 37.510 | 90.346 | 85.445 | 0.00 | 0.00 |
| ATOM | 6495 | H   | LEU | 435 | 37.668 | 90.804 | 86.331 | 0.00 | 0.00 |
| ATOM | 6496 | CA  | LEU | 435 | 36.334 | 89.466 | 85.252 | 0.00 | 0.00 |
| ATOM | 6497 | HA  | LEU | 435 | 36.680 | 88.571 | 84.735 | 0.00 | 0.00 |
| ATOM | 6498 | CB  | LEU | 435 | 35.796 | 88.967 | 86.620 | 0.00 | 0.00 |
| ATOM | 6499 | HB2 | LEU | 435 | 35.618 | 89.897 | 87.160 | 0.00 | 0.00 |

|      |      |      |     |     |        |        |        |      |      |
|------|------|------|-----|-----|--------|--------|--------|------|------|
| ATOM | 6500 | HB3  | LEU | 435 | 34.833 | 88.459 | 86.555 | 0.00 | 0.00 |
| ATOM | 6501 | CG   | LEU | 435 | 36.741 | 88.117 | 87.330 | 0.00 | 0.00 |
| ATOM | 6502 | HG   | LEU | 435 | 37.769 | 88.448 | 87.184 | 0.00 | 0.00 |
| ATOM | 6503 | CD1  | LEU | 435 | 36.469 | 88.070 | 88.797 | 0.00 | 0.00 |
| ATOM | 6504 | 1HD1 | LEU | 435 | 35.394 | 87.985 | 88.952 | 0.00 | 0.00 |
| ATOM | 6505 | 2HD1 | LEU | 435 | 37.058 | 87.270 | 89.245 | 0.00 | 0.00 |
| ATOM | 6506 | 3HD1 | LEU | 435 | 36.732 | 89.064 | 89.159 | 0.00 | 0.00 |
| ATOM | 6507 | CD2  | LEU | 435 | 36.712 | 86.699 | 86.824 | 0.00 | 0.00 |
| ATOM | 6508 | 1HD2 | LEU | 435 | 36.284 | 86.577 | 85.829 | 0.00 | 0.00 |
| ATOM | 6509 | 2HD2 | LEU | 435 | 37.640 | 86.127 | 86.807 | 0.00 | 0.00 |
| ATOM | 6510 | 3HD2 | LEU | 435 | 36.001 | 86.172 | 87.461 | 0.00 | 0.00 |
| ATOM | 6511 | C    | LEU | 435 | 35.184 | 90.021 | 84.387 | 0.00 | 0.00 |
| ATOM | 6512 | O    | LEU | 435 | 34.209 | 89.364 | 84.136 | 0.00 | 0.00 |
| ATOM | 6513 | N    | THR | 436 | 35.200 | 91.307 | 84.017 | 0.00 | 0.00 |
| ATOM | 6514 | H    | THR | 436 | 35.891 | 91.842 | 84.524 | 0.00 | 0.00 |
| ATOM | 6515 | CA   | THR | 436 | 34.312 | 92.024 | 83.166 | 0.00 | 0.00 |
| ATOM | 6516 | HA   | THR | 436 | 33.356 | 91.514 | 83.277 | 0.00 | 0.00 |
| ATOM | 6517 | CB   | THR | 436 | 34.174 | 93.508 | 83.680 | 0.00 | 0.00 |
| ATOM | 6518 | HB   | THR | 436 | 35.132 | 94.027 | 83.646 | 0.00 | 0.00 |
| ATOM | 6519 | CG2  | THR | 436 | 33.131 | 94.311 | 82.904 | 0.00 | 0.00 |
| ATOM | 6520 | 1HG2 | THR | 436 | 32.814 | 95.242 | 83.374 | 0.00 | 0.00 |
| ATOM | 6521 | 2HG2 | THR | 436 | 33.606 | 94.464 | 81.935 | 0.00 | 0.00 |
| ATOM | 6522 | 3HG2 | THR | 436 | 32.238 | 93.706 | 82.745 | 0.00 | 0.00 |
| ATOM | 6523 | OG1  | THR | 436 | 33.711 | 93.464 | 85.034 | 0.00 | 0.00 |
| ATOM | 6524 | HG1  | THR | 436 | 34.415 | 93.027 | 85.518 | 0.00 | 0.00 |
| ATOM | 6525 | C    | THR | 436 | 34.676 | 92.025 | 81.687 | 0.00 | 0.00 |

|      |      |      |     |     |        |        |        |      |      |
|------|------|------|-----|-----|--------|--------|--------|------|------|
| ATOM | 6526 | O    | THR | 436 | 33.895 | 91.631 | 80.863 | 0.00 | 0.00 |
| ATOM | 6527 | N    | VAL | 437 | 35.928 | 92.446 | 81.441 | 0.00 | 0.00 |
| ATOM | 6528 | H    | VAL | 437 | 36.517 | 92.727 | 82.212 | 0.00 | 0.00 |
| ATOM | 6529 | CA   | VAL | 437 | 36.534 | 92.366 | 80.155 | 0.00 | 0.00 |
| ATOM | 6530 | HA   | VAL | 437 | 36.034 | 93.025 | 79.445 | 0.00 | 0.00 |
| ATOM | 6531 | CB   | VAL | 437 | 37.987 | 92.852 | 80.168 | 0.00 | 0.00 |
| ATOM | 6532 | HB   | VAL | 437 | 38.530 | 92.215 | 80.866 | 0.00 | 0.00 |
| ATOM | 6533 | CG1  | VAL | 437 | 38.597 | 92.645 | 78.765 | 0.00 | 0.00 |
| ATOM | 6534 | 1HG1 | VAL | 437 | 37.930 | 93.200 | 78.105 | 0.00 | 0.00 |
| ATOM | 6535 | 2HG1 | VAL | 437 | 39.562 | 93.132 | 78.629 | 0.00 | 0.00 |
| ATOM | 6536 | 3HG1 | VAL | 437 | 38.644 | 91.597 | 78.469 | 0.00 | 0.00 |
| ATOM | 6537 | CG2  | VAL | 437 | 38.074 | 94.319 | 80.536 | 0.00 | 0.00 |
| ATOM | 6538 | 1HG2 | VAL | 437 | 37.486 | 94.838 | 79.779 | 0.00 | 0.00 |
| ATOM | 6539 | 2HG2 | VAL | 437 | 37.609 | 94.435 | 81.515 | 0.00 | 0.00 |
| ATOM | 6540 | 3HG2 | VAL | 437 | 39.093 | 94.700 | 80.590 | 0.00 | 0.00 |
| ATOM | 6541 | C    | VAL | 437 | 36.539 | 90.812 | 79.681 | 0.00 | 0.00 |
| ATOM | 6542 | O    | VAL | 437 | 36.293 | 90.487 | 78.492 | 0.00 | 0.00 |
| ATOM | 6543 | N    | ALA | 438 | 36.715 | 89.825 | 80.577 | 0.00 | 0.00 |
| ATOM | 6544 | H    | ALA | 438 | 36.924 | 90.070 | 81.534 | 0.00 | 0.00 |
| ATOM | 6545 | CA   | ALA | 438 | 36.526 | 88.393 | 80.296 | 0.00 | 0.00 |
| ATOM | 6546 | HA   | ALA | 438 | 37.312 | 87.987 | 79.659 | 0.00 | 0.00 |
| ATOM | 6547 | CB   | ALA | 438 | 36.903 | 87.751 | 81.683 | 0.00 | 0.00 |
| ATOM | 6548 | HB1  | ALA | 438 | 36.607 | 86.702 | 81.684 | 0.00 | 0.00 |
| ATOM | 6549 | HB2  | ALA | 438 | 37.956 | 87.902 | 81.919 | 0.00 | 0.00 |
| ATOM | 6550 | HB3  | ALA | 438 | 36.352 | 88.226 | 82.494 | 0.00 | 0.00 |
| ATOM | 6551 | C    | ALA | 438 | 35.131 | 88.060 | 79.772 | 0.00 | 0.00 |

|      |      |     |     |     |        |        |        |      |      |
|------|------|-----|-----|-----|--------|--------|--------|------|------|
| ATOM | 6552 | O   | ALA | 438 | 34.910 | 87.015 | 79.196 | 0.00 | 0.00 |
| ATOM | 6553 | N   | ASP | 439 | 34.106 | 88.854 | 80.079 | 0.00 | 0.00 |
| ATOM | 6554 | H   | ASP | 439 | 34.257 | 89.686 | 80.630 | 0.00 | 0.00 |
| ATOM | 6555 | CA  | ASP | 439 | 32.696 | 88.744 | 79.632 | 0.00 | 0.00 |
| ATOM | 6556 | HA  | ASP | 439 | 32.426 | 87.693 | 79.536 | 0.00 | 0.00 |
| ATOM | 6557 | CB  | ASP | 439 | 31.694 | 89.231 | 80.673 | 0.00 | 0.00 |
| ATOM | 6558 | HB2 | ASP | 439 | 31.864 | 88.756 | 81.640 | 0.00 | 0.00 |
| ATOM | 6559 | HB3 | ASP | 439 | 31.685 | 90.317 | 80.760 | 0.00 | 0.00 |
| ATOM | 6560 | CG  | ASP | 439 | 30.303 | 88.702 | 80.321 | 0.00 | 0.00 |
| ATOM | 6561 | OD1 | ASP | 439 | 29.484 | 89.493 | 79.741 | 0.00 | 0.00 |
| ATOM | 6562 | OD2 | ASP | 439 | 30.104 | 87.462 | 80.537 | 0.00 | 0.00 |
| ATOM | 6563 | C   | ASP | 439 | 32.416 | 89.304 | 78.235 | 0.00 | 0.00 |
| ATOM | 6564 | O   | ASP | 439 | 31.487 | 88.914 | 77.590 | 0.00 | 0.00 |
| ATOM | 6565 | N   | GLU | 440 | 33.339 | 90.055 | 77.700 | 0.00 | 0.00 |
| ATOM | 6566 | H   | GLU | 440 | 34.199 | 90.186 | 78.212 | 0.00 | 0.00 |
| ATOM | 6567 | CA  | GLU | 440 | 33.264 | 90.562 | 76.310 | 0.00 | 0.00 |
| ATOM | 6568 | HA  | GLU | 440 | 32.307 | 90.254 | 75.891 | 0.00 | 0.00 |
| ATOM | 6569 | CB  | GLU | 440 | 33.119 | 92.073 | 76.408 | 0.00 | 0.00 |
| ATOM | 6570 | HB2 | GLU | 440 | 32.984 | 92.524 | 75.425 | 0.00 | 0.00 |
| ATOM | 6571 | HB3 | GLU | 440 | 32.215 | 92.252 | 76.991 | 0.00 | 0.00 |
| ATOM | 6572 | CG  | GLU | 440 | 34.425 | 92.683 | 76.974 | 0.00 | 0.00 |
| ATOM | 6573 | HG2 | GLU | 440 | 34.551 | 92.637 | 78.055 | 0.00 | 0.00 |
| ATOM | 6574 | HG3 | GLU | 440 | 35.371 | 92.241 | 76.661 | 0.00 | 0.00 |
| ATOM | 6575 | CD  | GLU | 440 | 34.408 | 94.184 | 76.508 | 0.00 | 0.00 |
| ATOM | 6576 | OE1 | GLU | 440 | 33.770 | 94.936 | 77.199 | 0.00 | 0.00 |
| ATOM | 6577 | OE2 | GLU | 440 | 35.230 | 94.636 | 75.656 | 0.00 | 0.00 |



|      |      |     |     |     |        |        |        |      |      |
|------|------|-----|-----|-----|--------|--------|--------|------|------|
| ATOM | 6578 | C   | GLU | 440 | 34.242 | 90.039 | 75.361 | 0.00 | 0.00 |
| ATOM | 6579 | O   | GLU | 440 | 34.224 | 90.372 | 74.157 | 0.00 | 0.00 |
| ATOM | 6580 | N   | MET | 441 | 35.227 | 89.279 | 75.885 | 0.00 | 0.00 |
| ATOM | 6581 | H   | MET | 441 | 35.386 | 89.209 | 76.880 | 0.00 | 0.00 |
| ATOM | 6582 | CA  | MET | 441 | 36.385 | 88.698 | 75.163 | 0.00 | 0.00 |
| ATOM | 6583 | HA  | MET | 441 | 36.276 | 88.916 | 74.100 | 0.00 | 0.00 |
| ATOM | 6584 | CB  | MET | 441 | 37.666 | 89.454 | 75.600 | 0.00 | 0.00 |
| ATOM | 6585 | HB2 | MET | 441 | 37.423 | 90.307 | 76.234 | 0.00 | 0.00 |
| ATOM | 6586 | HB3 | MET | 441 | 38.387 | 88.751 | 76.016 | 0.00 | 0.00 |
| ATOM | 6587 | CG  | MET | 441 | 38.254 | 90.171 | 74.312 | 0.00 | 0.00 |
| ATOM | 6588 | HG2 | MET | 441 | 38.755 | 89.393 | 73.737 | 0.00 | 0.00 |
| ATOM | 6589 | HG3 | MET | 441 | 37.393 | 90.629 | 73.824 | 0.00 | 0.00 |
| ATOM | 6590 | SD  | MET | 441 | 39.406 | 91.392 | 74.779 | 0.00 | 0.00 |
| ATOM | 6591 | CE  | MET | 441 | 39.756 | 92.176 | 73.171 | 0.00 | 0.00 |
| ATOM | 6592 | HE1 | MET | 441 | 39.886 | 93.243 | 73.352 | 0.00 | 0.00 |
| ATOM | 6593 | HE2 | MET | 441 | 40.754 | 91.861 | 72.867 | 0.00 | 0.00 |
| ATOM | 6594 | HE3 | MET | 441 | 39.012 | 92.009 | 72.392 | 0.00 | 0.00 |
| ATOM | 6595 | C   | MET | 441 | 36.591 | 87.217 | 75.372 | 0.00 | 0.00 |
| ATOM | 6596 | O   | MET | 441 | 37.497 | 86.685 | 74.740 | 0.00 | 0.00 |
| ATOM | 6597 | N   | ASP | 442 | 35.818 | 86.461 | 76.196 | 0.00 | 0.00 |
| ATOM | 6598 | H   | ASP | 442 | 35.205 | 86.986 | 76.803 | 0.00 | 0.00 |
| ATOM | 6599 | CA  | ASP | 442 | 35.855 | 85.003 | 76.235 | 0.00 | 0.00 |
| ATOM | 6600 | HA  | ASP | 442 | 35.419 | 84.759 | 77.204 | 0.00 | 0.00 |
| ATOM | 6601 | CB  | ASP | 442 | 34.966 | 84.421 | 75.076 | 0.00 | 0.00 |
| ATOM | 6602 | HB2 | ASP | 442 | 33.996 | 84.891 | 75.240 | 0.00 | 0.00 |
| ATOM | 6603 | HB3 | ASP | 442 | 35.439 | 84.611 | 74.112 | 0.00 | 0.00 |

|      |      |      |     |     |        |        |        |      |      |
|------|------|------|-----|-----|--------|--------|--------|------|------|
| ATOM | 6604 | CG   | ASP | 442 | 34.682 | 82.924 | 75.174 | 0.00 | 0.00 |
| ATOM | 6605 | OD1  | ASP | 442 | 35.111 | 82.243 | 76.126 | 0.00 | 0.00 |
| ATOM | 6606 | OD2  | ASP | 442 | 34.126 | 82.431 | 74.188 | 0.00 | 0.00 |
| ATOM | 6607 | C    | ASP | 442 | 37.190 | 84.278 | 76.257 | 0.00 | 0.00 |
| ATOM | 6608 | O    | ASP | 442 | 37.731 | 83.751 | 75.300 | 0.00 | 0.00 |
| ATOM | 6609 | N    | ILE | 443 | 37.576 | 84.277 | 77.489 | 0.00 | 0.00 |
| ATOM | 6610 | H    | ILE | 443 | 36.872 | 84.513 | 78.173 | 0.00 | 0.00 |
| ATOM | 6611 | CA   | ILE | 443 | 38.874 | 83.861 | 77.999 | 0.00 | 0.00 |
| ATOM | 6612 | HA   | ILE | 443 | 39.306 | 83.080 | 77.373 | 0.00 | 0.00 |
| ATOM | 6613 | CB   | ILE | 443 | 39.890 | 85.049 | 77.946 | 0.00 | 0.00 |
| ATOM | 6614 | HB   | ILE | 443 | 40.847 | 84.813 | 78.410 | 0.00 | 0.00 |
| ATOM | 6615 | CG2  | ILE | 443 | 40.299 | 85.448 | 76.493 | 0.00 | 0.00 |
| ATOM | 6616 | 1HG2 | ILE | 443 | 41.077 | 86.211 | 76.541 | 0.00 | 0.00 |
| ATOM | 6617 | 2HG2 | ILE | 443 | 40.708 | 84.523 | 76.087 | 0.00 | 0.00 |
| ATOM | 6618 | 3HG2 | ILE | 443 | 39.449 | 85.647 | 75.841 | 0.00 | 0.00 |
| ATOM | 6619 | CG1  | ILE | 443 | 39.412 | 86.249 | 78.780 | 0.00 | 0.00 |
| ATOM | 6620 | 2HG1 | ILE | 443 | 38.424 | 86.601 | 78.485 | 0.00 | 0.00 |
| ATOM | 6621 | 3HG1 | ILE | 443 | 39.376 | 85.791 | 79.769 | 0.00 | 0.00 |
| ATOM | 6622 | CD1  | ILE | 443 | 40.384 | 87.472 | 78.863 | 0.00 | 0.00 |
| ATOM | 6623 | 1HD1 | ILE | 443 | 40.078 | 87.957 | 79.790 | 0.00 | 0.00 |
| ATOM | 6624 | 2HD1 | ILE | 443 | 41.435 | 87.191 | 78.926 | 0.00 | 0.00 |
| ATOM | 6625 | 3HD1 | ILE | 443 | 40.226 | 88.112 | 77.995 | 0.00 | 0.00 |
| ATOM | 6626 | C    | ILE | 443 | 38.783 | 83.285 | 79.432 | 0.00 | 0.00 |
| ATOM | 6627 | O    | ILE | 443 | 37.666 | 83.179 | 80.000 | 0.00 | 0.00 |
| ATOM | 6628 | N    | GLN | 444 | 39.933 | 83.022 | 80.050 | 0.00 | 0.00 |
| ATOM | 6629 | H    | GLN | 444 | 40.816 | 83.157 | 79.578 | 0.00 | 0.00 |

|      |      |      |     |     |        |        |        |      |      |
|------|------|------|-----|-----|--------|--------|--------|------|------|
| ATOM | 6630 | CA   | GLN | 444 | 40.027 | 82.517 | 81.462 | 0.00 | 0.00 |
| ATOM | 6631 | HA   | GLN | 444 | 39.015 | 82.481 | 81.866 | 0.00 | 0.00 |
| ATOM | 6632 | CB   | GLN | 444 | 40.550 | 81.065 | 81.472 | 0.00 | 0.00 |
| ATOM | 6633 | HB2  | GLN | 444 | 39.900 | 80.453 | 80.847 | 0.00 | 0.00 |
| ATOM | 6634 | HB3  | GLN | 444 | 41.553 | 80.925 | 81.069 | 0.00 | 0.00 |
| ATOM | 6635 | CG   | GLN | 444 | 40.497 | 80.363 | 82.867 | 0.00 | 0.00 |
| ATOM | 6636 | HG2  | GLN | 444 | 41.007 | 79.417 | 82.683 | 0.00 | 0.00 |
| ATOM | 6637 | HG3  | GLN | 444 | 41.168 | 80.806 | 83.603 | 0.00 | 0.00 |
| ATOM | 6638 | CD   | GLN | 444 | 39.092 | 80.172 | 83.491 | 0.00 | 0.00 |
| ATOM | 6639 | OE1  | GLN | 444 | 38.712 | 81.042 | 84.243 | 0.00 | 0.00 |
| ATOM | 6640 | NE2  | GLN | 444 | 38.285 | 79.264 | 83.003 | 0.00 | 0.00 |
| ATOM | 6641 | 1HE2 | GLN | 444 | 37.324 | 79.248 | 83.314 | 0.00 | 0.00 |
| ATOM | 6642 | 2HE2 | GLN | 444 | 38.658 | 78.614 | 82.325 | 0.00 | 0.00 |
| ATOM | 6643 | C    | GLN | 444 | 40.909 | 83.347 | 82.410 | 0.00 | 0.00 |
| ATOM | 6644 | O    | GLN | 444 | 41.797 | 84.067 | 81.956 | 0.00 | 0.00 |
| ATOM | 6645 | N    | VAL | 445 | 40.491 | 83.415 | 83.669 | 0.00 | 0.00 |
| ATOM | 6646 | H    | VAL | 445 | 39.757 | 82.792 | 83.973 | 0.00 | 0.00 |
| ATOM | 6647 | CA   | VAL | 445 | 41.153 | 84.260 | 84.653 | 0.00 | 0.00 |
| ATOM | 6648 | HA   | VAL | 445 | 42.050 | 84.766 | 84.295 | 0.00 | 0.00 |
| ATOM | 6649 | CB   | VAL | 445 | 40.221 | 85.396 | 85.192 | 0.00 | 0.00 |
| ATOM | 6650 | HB   | VAL | 445 | 39.364 | 84.896 | 85.644 | 0.00 | 0.00 |
| ATOM | 6651 | CG1  | VAL | 445 | 40.949 | 86.325 | 86.152 | 0.00 | 0.00 |
| ATOM | 6652 | 1HG1 | VAL | 445 | 41.100 | 85.916 | 87.151 | 0.00 | 0.00 |
| ATOM | 6653 | 2HG1 | VAL | 445 | 41.875 | 86.699 | 85.715 | 0.00 | 0.00 |
| ATOM | 6654 | 3HG1 | VAL | 445 | 40.353 | 87.215 | 86.355 | 0.00 | 0.00 |
| ATOM | 6655 | CG2  | VAL | 445 | 39.718 | 86.269 | 84.052 | 0.00 | 0.00 |

|      |      |      |     |     |        |        |        |      |      |
|------|------|------|-----|-----|--------|--------|--------|------|------|
| ATOM | 6656 | 1HG2 | VAL | 445 | 40.549 | 86.759 | 83.546 | 0.00 | 0.00 |
| ATOM | 6657 | 2HG2 | VAL | 445 | 39.160 | 85.790 | 83.247 | 0.00 | 0.00 |
| ATOM | 6658 | 3HG2 | VAL | 445 | 38.956 | 86.873 | 84.545 | 0.00 | 0.00 |
| ATOM | 6659 | C    | VAL | 445 | 41.673 | 83.372 | 85.879 | 0.00 | 0.00 |
| ATOM | 6660 | O    | VAL | 445 | 40.855 | 82.542 | 86.361 | 0.00 | 0.00 |
| ATOM | 6661 | N    | ALA | 446 | 42.907 | 83.666 | 86.347 | 0.00 | 0.00 |
| ATOM | 6662 | H    | ALA | 446 | 43.402 | 84.360 | 85.806 | 0.00 | 0.00 |
| ATOM | 6663 | CA   | ALA | 446 | 43.551 | 83.038 | 87.511 | 0.00 | 0.00 |
| ATOM | 6664 | HA   | ALA | 446 | 42.829 | 82.332 | 87.921 | 0.00 | 0.00 |
| ATOM | 6665 | CB   | ALA | 446 | 44.793 | 82.328 | 87.029 | 0.00 | 0.00 |
| ATOM | 6666 | HB1  | ALA | 446 | 45.486 | 82.944 | 86.456 | 0.00 | 0.00 |
| ATOM | 6667 | HB2  | ALA | 446 | 45.298 | 81.982 | 87.931 | 0.00 | 0.00 |
| ATOM | 6668 | HB3  | ALA | 446 | 44.547 | 81.435 | 86.455 | 0.00 | 0.00 |
| ATOM | 6669 | C    | ALA | 446 | 43.747 | 84.046 | 88.651 | 0.00 | 0.00 |
| ATOM | 6670 | O    | ALA | 446 | 43.979 | 85.256 | 88.504 | 0.00 | 0.00 |
| ATOM | 6671 | N    | LEU | 447 | 43.615 | 83.526 | 89.900 | 0.00 | 0.00 |
| ATOM | 6672 | H    | LEU | 447 | 43.390 | 82.541 | 89.935 | 0.00 | 0.00 |
| ATOM | 6673 | CA   | LEU | 447 | 43.882 | 84.177 | 91.216 | 0.00 | 0.00 |
| ATOM | 6674 | HA   | LEU | 447 | 44.199 | 85.211 | 91.086 | 0.00 | 0.00 |
| ATOM | 6675 | CB   | LEU | 447 | 42.628 | 84.089 | 92.126 | 0.00 | 0.00 |
| ATOM | 6676 | HB2  | LEU | 447 | 41.758 | 84.404 | 91.549 | 0.00 | 0.00 |
| ATOM | 6677 | HB3  | LEU | 447 | 42.405 | 83.028 | 92.234 | 0.00 | 0.00 |
| ATOM | 6678 | CG   | LEU | 447 | 42.543 | 84.861 | 93.469 | 0.00 | 0.00 |
| ATOM | 6679 | HG   | LEU | 447 | 43.388 | 84.691 | 94.136 | 0.00 | 0.00 |
| ATOM | 6680 | CD1  | LEU | 447 | 42.541 | 86.344 | 93.125 | 0.00 | 0.00 |
| ATOM | 6681 | 1HD1 | LEU | 447 | 41.769 | 86.528 | 92.378 | 0.00 | 0.00 |

|      |      |      |     |     |        |        |        |      |      |
|------|------|------|-----|-----|--------|--------|--------|------|------|
| ATOM | 6682 | 2HD1 | LEU | 447 | 42.271 | 86.874 | 94.039 | 0.00 | 0.00 |
| ATOM | 6683 | 3HD1 | LEU | 447 | 43.451 | 86.762 | 92.694 | 0.00 | 0.00 |
| ATOM | 6684 | CD2  | LEU | 447 | 41.195 | 84.466 | 94.188 | 0.00 | 0.00 |
| ATOM | 6685 | 1HD2 | LEU | 447 | 40.971 | 85.354 | 94.779 | 0.00 | 0.00 |
| ATOM | 6686 | 2HD2 | LEU | 447 | 40.409 | 84.345 | 93.443 | 0.00 | 0.00 |
| ATOM | 6687 | 3HD2 | LEU | 447 | 41.300 | 83.555 | 94.777 | 0.00 | 0.00 |
| ATOM | 6688 | C    | LEU | 447 | 45.082 | 83.608 | 91.934 | 0.00 | 0.00 |
| ATOM | 6689 | O    | LEU | 447 | 45.179 | 82.401 | 92.219 | 0.00 | 0.00 |
| ATOM | 6690 | N    | H11 | 448 | 45.872 | 84.533 | 92.553 | 0.00 | 0.00 |
| ATOM | 6691 | H    | H11 | 448 | 45.747 | 85.489 | 92.250 | 0.00 | 0.00 |
| ATOM | 6692 | CA   | H11 | 448 | 46.627 | 84.486 | 93.800 | 0.00 | 0.00 |
| ATOM | 6693 | HA   | H11 | 448 | 46.470 | 83.583 | 94.390 | 0.00 | 0.00 |
| ATOM | 6694 | CB   | H11 | 448 | 48.095 | 84.420 | 93.494 | 0.00 | 0.00 |
| ATOM | 6695 | HB2  | H11 | 448 | 48.307 | 83.502 | 92.947 | 0.00 | 0.00 |
| ATOM | 6696 | HB3  | H11 | 448 | 48.270 | 85.261 | 92.823 | 0.00 | 0.00 |
| ATOM | 6697 | CG   | H11 | 448 | 49.194 | 84.499 | 94.557 | 0.00 | 0.00 |
| ATOM | 6698 | ND1  | H11 | 448 | 50.379 | 83.703 | 94.712 | 0.00 | 0.00 |
| ATOM | 6699 | CE1  | H11 | 448 | 50.971 | 84.117 | 95.815 | 0.00 | 0.00 |
| ATOM | 6700 | HE1  | H11 | 448 | 51.942 | 83.717 | 96.066 | 0.00 | 0.00 |
| ATOM | 6701 | NE2  | H11 | 448 | 50.239 | 85.082 | 96.435 | 0.00 | 0.00 |
| ATOM | 6702 | HE2  | H11 | 448 | 50.288 | 85.426 | 97.383 | 0.00 | 0.00 |
| ATOM | 6703 | CD2  | H11 | 448 | 49.133 | 85.335 | 95.600 | 0.00 | 0.00 |
| ATOM | 6704 | HD2  | H11 | 448 | 48.367 | 86.061 | 95.831 | 0.00 | 0.00 |
| ATOM | 6705 | C    | H11 | 448 | 46.206 | 85.748 | 94.585 | 0.00 | 0.00 |
| ATOM | 6706 | O    | H11 | 448 | 46.531 | 86.854 | 94.175 | 0.00 | 0.00 |
| ATOM | 6707 | N    | SER | 449 | 45.378 | 85.622 | 95.653 | 0.00 | 0.00 |

|      |      |     |     |     |        |        |         |      |      |
|------|------|-----|-----|-----|--------|--------|---------|------|------|
| ATOM | 6708 | H   | SER | 449 | 45.029 | 84.703 | 95.884  | 0.00 | 0.00 |
| ATOM | 6709 | CA  | SER | 449 | 44.904 | 86.784 | 96.479  | 0.00 | 0.00 |
| ATOM | 6710 | HA  | SER | 449 | 44.710 | 87.621 | 95.808  | 0.00 | 0.00 |
| ATOM | 6711 | CB  | SER | 449 | 43.563 | 86.481 | 97.206  | 0.00 | 0.00 |
| ATOM | 6712 | HB2 | SER | 449 | 43.193 | 87.267 | 97.865  | 0.00 | 0.00 |
| ATOM | 6713 | HB3 | SER | 449 | 42.818 | 86.310 | 96.430  | 0.00 | 0.00 |
| ATOM | 6714 | OG  | SER | 449 | 43.749 | 85.302 | 97.999  | 0.00 | 0.00 |
| ATOM | 6715 | HG  | SER | 449 | 43.734 | 84.601 | 97.343  | 0.00 | 0.00 |
| ATOM | 6716 | C   | SER | 449 | 46.059 | 87.254 | 97.450  | 0.00 | 0.00 |
| ATOM | 6717 | O   | SER | 449 | 47.098 | 86.622 | 97.659  | 0.00 | 0.00 |
| ATOM | 6718 | N   | ASP | 450 | 45.954 | 88.398 | 98.044  | 0.00 | 0.00 |
| ATOM | 6719 | H   | ASP | 450 | 45.094 | 88.925 | 98.022  | 0.00 | 0.00 |
| ATOM | 6720 | CA  | ASP | 450 | 46.903 | 88.995 | 99.011  | 0.00 | 0.00 |
| ATOM | 6721 | HA  | ASP | 450 | 47.893 | 88.831 | 98.585  | 0.00 | 0.00 |
| ATOM | 6722 | CB  | ASP | 450 | 46.775 | 90.504 | 99.014  | 0.00 | 0.00 |
| ATOM | 6723 | HB2 | ASP | 450 | 47.611 | 90.980 | 99.527  | 0.00 | 0.00 |
| ATOM | 6724 | HB3 | ASP | 450 | 46.806 | 90.853 | 97.982  | 0.00 | 0.00 |
| ATOM | 6725 | CG  | ASP | 450 | 45.498 | 91.063 | 99.710  | 0.00 | 0.00 |
| ATOM | 6726 | OD1 | ASP | 450 | 44.412 | 90.747 | 99.205  | 0.00 | 0.00 |
| ATOM | 6727 | OD2 | ASP | 450 | 45.684 | 91.823 | 100.687 | 0.00 | 0.00 |
| ATOM | 6728 | C   | ASP | 450 | 46.894 | 88.442 | 100.368 | 0.00 | 0.00 |
| ATOM | 6729 | O   | ASP | 450 | 45.876 | 88.249 | 101.036 | 0.00 | 0.00 |
| ATOM | 6730 | N   | THR | 451 | 48.126 | 88.216 | 100.798 | 0.00 | 0.00 |
| ATOM | 6731 | H   | THR | 451 | 48.896 | 88.355 | 100.159 | 0.00 | 0.00 |
| ATOM | 6732 | CA  | THR | 451 | 48.409 | 87.792 | 102.175 | 0.00 | 0.00 |
| ATOM | 6733 | HA  | THR | 451 | 47.870 | 86.858 | 102.334 | 0.00 | 0.00 |

|      |      |      |     |     |        |        |         |      |      |
|------|------|------|-----|-----|--------|--------|---------|------|------|
| ATOM | 6734 | CB   | THR | 451 | 49.893 | 87.527 | 102.373 | 0.00 | 0.00 |
| ATOM | 6735 | HB   | THR | 451 | 50.368 | 88.503 | 102.470 | 0.00 | 0.00 |
| ATOM | 6736 | CG2  | THR | 451 | 50.248 | 86.739 | 103.592 | 0.00 | 0.00 |
| ATOM | 6737 | 1HG2 | THR | 451 | 49.690 | 87.094 | 104.459 | 0.00 | 0.00 |
| ATOM | 6738 | 2HG2 | THR | 451 | 49.939 | 85.716 | 103.379 | 0.00 | 0.00 |
| ATOM | 6739 | 3HG2 | THR | 451 | 51.331 | 86.814 | 103.695 | 0.00 | 0.00 |
| ATOM | 6740 | OG1  | THR | 451 | 50.602 | 86.835 | 101.366 | 0.00 | 0.00 |
| ATOM | 6741 | HG1  | THR | 451 | 50.661 | 87.434 | 100.618 | 0.00 | 0.00 |
| ATOM | 6742 | C    | THR | 451 | 47.909 | 88.807 | 103.168 | 0.00 | 0.00 |
| ATOM | 6743 | O    | THR | 451 | 47.435 | 88.498 | 104.240 | 0.00 | 0.00 |
| ATOM | 6744 | N    | LEU | 452 | 48.011 | 90.077 | 102.749 | 0.00 | 0.00 |
| ATOM | 6745 | H    | LEU | 452 | 48.528 | 90.318 | 101.916 | 0.00 | 0.00 |
| ATOM | 6746 | CA   | LEU | 452 | 47.690 | 91.234 | 103.659 | 0.00 | 0.00 |
| ATOM | 6747 | HA   | LEU | 452 | 48.271 | 91.284 | 104.580 | 0.00 | 0.00 |
| ATOM | 6748 | CB   | LEU | 452 | 48.151 | 92.477 | 102.827 | 0.00 | 0.00 |
| ATOM | 6749 | HB2  | LEU | 452 | 48.032 | 92.260 | 101.765 | 0.00 | 0.00 |
| ATOM | 6750 | HB3  | LEU | 452 | 47.496 | 93.282 | 103.160 | 0.00 | 0.00 |
| ATOM | 6751 | CG   | LEU | 452 | 49.657 | 93.028 | 102.968 | 0.00 | 0.00 |
| ATOM | 6752 | HG   | LEU | 452 | 49.738 | 93.240 | 104.034 | 0.00 | 0.00 |
| ATOM | 6753 | CD1  | LEU | 452 | 50.711 | 91.943 | 102.726 | 0.00 | 0.00 |
| ATOM | 6754 | 1HD1 | LEU | 452 | 50.716 | 91.727 | 101.657 | 0.00 | 0.00 |
| ATOM | 6755 | 2HD1 | LEU | 452 | 51.705 | 92.288 | 103.008 | 0.00 | 0.00 |
| ATOM | 6756 | 3HD1 | LEU | 452 | 50.422 | 90.999 | 103.187 | 0.00 | 0.00 |
| ATOM | 6757 | CD2  | LEU | 452 | 49.852 | 94.354 | 102.243 | 0.00 | 0.00 |
| ATOM | 6758 | 1HD2 | LEU | 452 | 50.913 | 94.600 | 102.285 | 0.00 | 0.00 |
| ATOM | 6759 | 2HD2 | LEU | 452 | 49.478 | 94.315 | 101.220 | 0.00 | 0.00 |

|      |      |      |     |     |        |        |         |      |      |
|------|------|------|-----|-----|--------|--------|---------|------|------|
| ATOM | 6760 | 3HD2 | LEU | 452 | 49.334 | 95.203 | 102.689 | 0.00 | 0.00 |
| ATOM | 6761 | C    | LEU | 452 | 46.168 | 91.319 | 104.073 | 0.00 | 0.00 |
| ATOM | 6762 | O    | LEU | 452 | 45.882 | 91.988 | 105.092 | 0.00 | 0.00 |
| ATOM | 6763 | N    | ASN | 453 | 45.266 | 90.726 | 103.309 | 0.00 | 0.00 |
| ATOM | 6764 | H    | ASN | 453 | 45.655 | 90.451 | 102.418 | 0.00 | 0.00 |
| ATOM | 6765 | CA   | ASN | 453 | 43.789 | 90.882 | 103.453 | 0.00 | 0.00 |
| ATOM | 6766 | HA   | ASN | 453 | 43.348 | 90.503 | 102.531 | 0.00 | 0.00 |
| ATOM | 6767 | CB   | ASN | 453 | 43.281 | 90.093 | 104.721 | 0.00 | 0.00 |
| ATOM | 6768 | HB2  | ASN | 453 | 43.353 | 90.828 | 105.522 | 0.00 | 0.00 |
| ATOM | 6769 | HB3  | ASN | 453 | 42.212 | 89.937 | 104.578 | 0.00 | 0.00 |
| ATOM | 6770 | CG   | ASN | 453 | 43.988 | 88.839 | 105.002 | 0.00 | 0.00 |
| ATOM | 6771 | OD1  | ASN | 453 | 44.058 | 88.014 | 104.130 | 0.00 | 0.00 |
| ATOM | 6772 | ND2  | ASN | 453 | 44.264 | 88.643 | 106.251 | 0.00 | 0.00 |
| ATOM | 6773 | 1HD2 | ASN | 453 | 44.375 | 87.687 | 106.558 | 0.00 | 0.00 |
| ATOM | 6774 | 2HD2 | ASN | 453 | 44.220 | 89.415 | 106.902 | 0.00 | 0.00 |
| ATOM | 6775 | C    | ASN | 453 | 43.439 | 92.381 | 103.600 | 0.00 | 0.00 |
| ATOM | 6776 | O    | ASN | 453 | 42.647 | 92.794 | 104.445 | 0.00 | 0.00 |
| ATOM | 6777 | N    | GLU | 454 | 44.007 | 93.127 | 102.670 | 0.00 | 0.00 |
| ATOM | 6778 | H    | GLU | 454 | 44.356 | 92.746 | 101.802 | 0.00 | 0.00 |
| ATOM | 6779 | CA   | GLU | 454 | 44.147 | 94.589 | 102.694 | 0.00 | 0.00 |
| ATOM | 6780 | HA   | GLU | 454 | 44.471 | 94.930 | 103.677 | 0.00 | 0.00 |
| ATOM | 6781 | CB   | GLU | 454 | 45.182 | 95.144 | 101.659 | 0.00 | 0.00 |
| ATOM | 6782 | HB2  | GLU | 454 | 46.013 | 94.439 | 101.661 | 0.00 | 0.00 |
| ATOM | 6783 | HB3  | GLU | 454 | 44.759 | 95.134 | 100.654 | 0.00 | 0.00 |
| ATOM | 6784 | CG   | GLU | 454 | 45.824 | 96.486 | 102.007 | 0.00 | 0.00 |
| ATOM | 6785 | HG2  | GLU | 454 | 45.030 | 97.233 | 101.992 | 0.00 | 0.00 |



|      |      |     |     |     |        |        |         |      |      |
|------|------|-----|-----|-----|--------|--------|---------|------|------|
| ATOM | 6786 | HG3 | GLU | 454 | 46.170 | 96.507 | 103.041 | 0.00 | 0.00 |
| ATOM | 6787 | CD  | GLU | 454 | 46.999 | 96.838 | 101.138 | 0.00 | 0.00 |
| ATOM | 6788 | OE1 | GLU | 454 | 47.181 | 96.327 | 100.015 | 0.00 | 0.00 |
| ATOM | 6789 | OE2 | GLU | 454 | 47.865 | 97.669 | 101.511 | 0.00 | 0.00 |
| ATOM | 6790 | C   | GLU | 454 | 42.825 | 95.297 | 102.327 | 0.00 | 0.00 |
| ATOM | 6791 | O   | GLU | 454 | 42.326 | 96.183 | 102.975 | 0.00 | 0.00 |
| ATOM | 6792 | N   | SER | 455 | 42.151 | 94.805 | 101.267 | 0.00 | 0.00 |
| ATOM | 6793 | H   | SER | 455 | 42.470 | 93.993 | 100.759 | 0.00 | 0.00 |
| ATOM | 6794 | CA  | SER | 455 | 40.931 | 95.485 | 100.727 | 0.00 | 0.00 |
| ATOM | 6795 | HA  | SER | 455 | 41.039 | 96.554 | 100.910 | 0.00 | 0.00 |
| ATOM | 6796 | CB  | SER | 455 | 40.908 | 95.335 | 99.210  | 0.00 | 0.00 |
| ATOM | 6797 | HB2 | SER | 455 | 40.572 | 94.324 | 98.979  | 0.00 | 0.00 |
| ATOM | 6798 | HB3 | SER | 455 | 40.263 | 96.150 | 98.880  | 0.00 | 0.00 |
| ATOM | 6799 | OG  | SER | 455 | 42.076 | 95.619 | 98.480  | 0.00 | 0.00 |
| ATOM | 6800 | HG  | SER | 455 | 42.899 | 95.338 | 98.886  | 0.00 | 0.00 |
| ATOM | 6801 | C   | SER | 455 | 39.583 | 94.898 | 101.324 | 0.00 | 0.00 |
| ATOM | 6802 | O   | SER | 455 | 38.561 | 95.468 | 101.114 | 0.00 | 0.00 |
| ATOM | 6803 | N   | GLY | 456 | 39.672 | 93.660 | 101.966 | 0.00 | 0.00 |
| ATOM | 6804 | H   | GLY | 456 | 40.548 | 93.164 | 102.053 | 0.00 | 0.00 |
| ATOM | 6805 | CA  | GLY | 456 | 38.481 | 92.907 | 102.271 | 0.00 | 0.00 |
| ATOM | 6806 | HA2 | GLY | 456 | 38.070 | 93.314 | 103.194 | 0.00 | 0.00 |
| ATOM | 6807 | HA3 | GLY | 456 | 37.713 | 93.039 | 101.509 | 0.00 | 0.00 |
| ATOM | 6808 | C   | GLY | 456 | 38.752 | 91.414 | 102.334 | 0.00 | 0.00 |
| ATOM | 6809 | O   | GLY | 456 | 39.509 | 90.869 | 101.597 | 0.00 | 0.00 |
| ATOM | 6810 | N   | PHE | 457 | 38.063 | 90.621 | 103.132 | 0.00 | 0.00 |
| ATOM | 6811 | H   | PHE | 457 | 37.571 | 91.020 | 103.918 | 0.00 | 0.00 |

|      |      |      |     |     |        |        |         |      |      |
|------|------|------|-----|-----|--------|--------|---------|------|------|
| ATOM | 6812 | CA   | PHE | 457 | 38.237 | 89.172 | 103.320 | 0.00 | 0.00 |
| ATOM | 6813 | HA   | PHE | 457 | 39.306 | 88.962 | 103.369 | 0.00 | 0.00 |
| ATOM | 6814 | CB   | PHE | 457 | 37.667 | 88.870 | 104.681 | 0.00 | 0.00 |
| ATOM | 6815 | HB2  | PHE | 457 | 36.604 | 89.110 | 104.693 | 0.00 | 0.00 |
| ATOM | 6816 | HB3  | PHE | 457 | 37.572 | 87.788 | 104.774 | 0.00 | 0.00 |
| ATOM | 6817 | CG   | PHE | 457 | 38.521 | 89.331 | 105.843 | 0.00 | 0.00 |
| ATOM | 6818 | CD1  | PHE | 457 | 37.975 | 90.125 | 106.873 | 0.00 | 0.00 |
| ATOM | 6819 | HD1  | PHE | 457 | 36.920 | 90.317 | 107.007 | 0.00 | 0.00 |
| ATOM | 6820 | CE1  | PHE | 457 | 38.808 | 90.809 | 107.777 | 0.00 | 0.00 |
| ATOM | 6821 | HE1  | PHE | 457 | 38.405 | 91.436 | 108.558 | 0.00 | 0.00 |
| ATOM | 6822 | CZ   | PHE | 457 | 40.225 | 90.475 | 107.764 | 0.00 | 0.00 |
| ATOM | 6823 | HZ   | PHE | 457 | 40.888 | 90.900 | 108.503 | 0.00 | 0.00 |
| ATOM | 6824 | CE2  | PHE | 457 | 40.774 | 89.564 | 106.840 | 0.00 | 0.00 |
| ATOM | 6825 | HE2  | PHE | 457 | 41.814 | 89.281 | 106.907 | 0.00 | 0.00 |
| ATOM | 6826 | CD2  | PHE | 457 | 39.908 | 88.995 | 105.908 | 0.00 | 0.00 |
| ATOM | 6827 | HD2  | PHE | 457 | 40.330 | 88.309 | 105.189 | 0.00 | 0.00 |
| ATOM | 6828 | C    | PHE | 457 | 37.512 | 88.392 | 102.190 | 0.00 | 0.00 |
| ATOM | 6829 | O    | PHE | 457 | 36.971 | 88.901 | 101.209 | 0.00 | 0.00 |
| ATOM | 6830 | N    | VAL | 458 | 37.621 | 87.063 | 102.231 | 0.00 | 0.00 |
| ATOM | 6831 | H    | VAL | 458 | 38.182 | 86.683 | 102.980 | 0.00 | 0.00 |
| ATOM | 6832 | CA   | VAL | 458 | 37.063 | 86.122 | 101.221 | 0.00 | 0.00 |
| ATOM | 6833 | HA   | VAL | 458 | 37.561 | 86.324 | 100.273 | 0.00 | 0.00 |
| ATOM | 6834 | CB   | VAL | 458 | 37.486 | 84.601 | 101.537 | 0.00 | 0.00 |
| ATOM | 6835 | HB   | VAL | 458 | 38.536 | 84.608 | 101.829 | 0.00 | 0.00 |
| ATOM | 6836 | CG1  | VAL | 458 | 36.818 | 84.016 | 102.773 | 0.00 | 0.00 |
| ATOM | 6837 | 1HG1 | VAL | 458 | 37.167 | 84.588 | 103.633 | 0.00 | 0.00 |

|      |      |      |     |     |        |        |         |      |      |
|------|------|------|-----|-----|--------|--------|---------|------|------|
| ATOM | 6838 | 2HG1 | VAL | 458 | 35.734 | 84.133 | 102.766 | 0.00 | 0.00 |
| ATOM | 6839 | 3HG1 | VAL | 458 | 37.134 | 82.991 | 102.967 | 0.00 | 0.00 |
| ATOM | 6840 | CG2  | VAL | 458 | 37.231 | 83.630 | 100.461 | 0.00 | 0.00 |
| ATOM | 6841 | 1HG2 | VAL | 458 | 37.817 | 83.966 | 99.605  | 0.00 | 0.00 |
| ATOM | 6842 | 2HG2 | VAL | 458 | 37.534 | 82.606 | 100.678 | 0.00 | 0.00 |
| ATOM | 6843 | 3HG2 | VAL | 458 | 36.176 | 83.570 | 100.195 | 0.00 | 0.00 |
| ATOM | 6844 | C    | VAL | 458 | 35.557 | 86.211 | 100.933 | 0.00 | 0.00 |
| ATOM | 6845 | O    | VAL | 458 | 35.163 | 86.010 | 99.812  | 0.00 | 0.00 |
| ATOM | 6846 | N    | GLU | 459 | 34.805 | 86.657 | 101.960 | 0.00 | 0.00 |
| ATOM | 6847 | H    | GLU | 459 | 35.132 | 86.649 | 102.915 | 0.00 | 0.00 |
| ATOM | 6848 | CA   | GLU | 459 | 33.375 | 86.965 | 101.708 | 0.00 | 0.00 |
| ATOM | 6849 | HA   | GLU | 459 | 32.966 | 86.094 | 101.197 | 0.00 | 0.00 |
| ATOM | 6850 | CB   | GLU | 459 | 32.658 | 87.068 | 103.046 | 0.00 | 0.00 |
| ATOM | 6851 | HB2  | GLU | 459 | 31.576 | 87.035 | 102.915 | 0.00 | 0.00 |
| ATOM | 6852 | HB3  | GLU | 459 | 32.852 | 86.123 | 103.552 | 0.00 | 0.00 |
| ATOM | 6853 | CG   | GLU | 459 | 33.125 | 88.264 | 103.973 | 0.00 | 0.00 |
| ATOM | 6854 | HG2  | GLU | 459 | 33.656 | 88.969 | 103.335 | 0.00 | 0.00 |
| ATOM | 6855 | HG3  | GLU | 459 | 32.263 | 88.730 | 104.451 | 0.00 | 0.00 |
| ATOM | 6856 | CD   | GLU | 459 | 34.202 | 87.960 | 105.001 | 0.00 | 0.00 |
| ATOM | 6857 | OE1  | GLU | 459 | 34.256 | 88.596 | 106.065 | 0.00 | 0.00 |
| ATOM | 6858 | OE2  | GLU | 459 | 34.892 | 86.954 | 104.844 | 0.00 | 0.00 |
| ATOM | 6859 | C    | GLU | 459 | 33.031 | 88.207 | 100.836 | 0.00 | 0.00 |
| ATOM | 6860 | O    | GLU | 459 | 31.893 | 88.377 | 100.470 | 0.00 | 0.00 |
| ATOM | 6861 | N    | ASP | 460 | 34.000 | 89.079 | 100.678 | 0.00 | 0.00 |
| ATOM | 6862 | H    | ASP | 460 | 34.903 | 88.847 | 101.068 | 0.00 | 0.00 |
| ATOM | 6863 | CA   | ASP | 460 | 34.125 | 90.330 | 99.916  | 0.00 | 0.00 |

|      |      |      |     |     |        |        |         |      |      |
|------|------|------|-----|-----|--------|--------|---------|------|------|
| ATOM | 6864 | HA   | ASP | 460 | 33.113 | 90.641 | 99.656  | 0.00 | 0.00 |
| ATOM | 6865 | CB   | ASP | 460 | 34.698 | 91.400 | 100.846 | 0.00 | 0.00 |
| ATOM | 6866 | HB2  | ASP | 460 | 34.019 | 91.481 | 101.695 | 0.00 | 0.00 |
| ATOM | 6867 | HB3  | ASP | 460 | 35.629 | 91.000 | 101.247 | 0.00 | 0.00 |
| ATOM | 6868 | CG   | ASP | 460 | 34.937 | 92.690 | 100.104 | 0.00 | 0.00 |
| ATOM | 6869 | OD1  | ASP | 460 | 36.056 | 93.078 | 99.772  | 0.00 | 0.00 |
| ATOM | 6870 | OD2  | ASP | 460 | 33.932 | 93.361 | 99.715  | 0.00 | 0.00 |
| ATOM | 6871 | C    | ASP | 460 | 34.858 | 90.084 | 98.528  | 0.00 | 0.00 |
| ATOM | 6872 | O    | ASP | 460 | 34.388 | 90.487 | 97.495  | 0.00 | 0.00 |
| ATOM | 6873 | N    | THR | 461 | 35.995 | 89.362 | 98.621  | 0.00 | 0.00 |
| ATOM | 6874 | H    | THR | 461 | 36.315 | 88.971 | 99.496  | 0.00 | 0.00 |
| ATOM | 6875 | CA   | THR | 461 | 36.757 | 88.866 | 97.534  | 0.00 | 0.00 |
| ATOM | 6876 | HA   | THR | 461 | 37.188 | 89.700 | 96.980  | 0.00 | 0.00 |
| ATOM | 6877 | CB   | THR | 461 | 37.936 | 88.002 | 97.957  | 0.00 | 0.00 |
| ATOM | 6878 | HB   | THR | 461 | 37.626 | 87.090 | 98.466  | 0.00 | 0.00 |
| ATOM | 6879 | CG2  | THR | 461 | 38.890 | 87.793 | 96.804  | 0.00 | 0.00 |
| ATOM | 6880 | 1HG2 | THR | 461 | 38.360 | 87.403 | 95.935  | 0.00 | 0.00 |
| ATOM | 6881 | 2HG2 | THR | 461 | 39.189 | 88.754 | 96.384  | 0.00 | 0.00 |
| ATOM | 6882 | 3HG2 | THR | 461 | 39.729 | 87.163 | 97.101  | 0.00 | 0.00 |
| ATOM | 6883 | OG1  | THR | 461 | 38.697 | 88.723 | 98.885  | 0.00 | 0.00 |
| ATOM | 6884 | HG1  | THR | 461 | 38.675 | 89.660 | 98.677  | 0.00 | 0.00 |
| ATOM | 6885 | C    | THR | 461 | 35.944 | 88.042 | 96.531  | 0.00 | 0.00 |
| ATOM | 6886 | O    | THR | 461 | 35.912 | 88.375 | 95.396  | 0.00 | 0.00 |
| ATOM | 6887 | N    | LEU | 462 | 35.214 | 87.055 | 97.057  | 0.00 | 0.00 |
| ATOM | 6888 | H    | LEU | 462 | 35.282 | 86.920 | 98.056  | 0.00 | 0.00 |
| ATOM | 6889 | CA   | LEU | 462 | 34.179 | 86.323 | 96.296  | 0.00 | 0.00 |

|      |      |      |     |     |        |        |        |      |      |
|------|------|------|-----|-----|--------|--------|--------|------|------|
| ATOM | 6890 | HA   | LEU | 462 | 34.721 | 86.038 | 95.394 | 0.00 | 0.00 |
| ATOM | 6891 | CB   | LEU | 462 | 33.671 | 85.052 | 96.989 | 0.00 | 0.00 |
| ATOM | 6892 | HB2  | LEU | 462 | 33.644 | 85.174 | 98.072 | 0.00 | 0.00 |
| ATOM | 6893 | HB3  | LEU | 462 | 32.694 | 84.759 | 96.604 | 0.00 | 0.00 |
| ATOM | 6894 | CG   | LEU | 462 | 34.531 | 83.864 | 96.712 | 0.00 | 0.00 |
| ATOM | 6895 | HG   | LEU | 462 | 34.602 | 83.738 | 95.632 | 0.00 | 0.00 |
| ATOM | 6896 | CD1  | LEU | 462 | 35.956 | 83.902 | 97.128 | 0.00 | 0.00 |
| ATOM | 6897 | 1HD1 | LEU | 462 | 35.986 | 84.149 | 98.189 | 0.00 | 0.00 |
| ATOM | 6898 | 2HD1 | LEU | 462 | 36.404 | 82.925 | 96.948 | 0.00 | 0.00 |
| ATOM | 6899 | 3HD1 | LEU | 462 | 36.486 | 84.743 | 96.682 | 0.00 | 0.00 |
| ATOM | 6900 | CD2  | LEU | 462 | 33.890 | 82.647 | 97.304 | 0.00 | 0.00 |
| ATOM | 6901 | 1HD2 | LEU | 462 | 34.363 | 81.704 | 97.028 | 0.00 | 0.00 |
| ATOM | 6902 | 2HD2 | LEU | 462 | 33.914 | 82.729 | 98.391 | 0.00 | 0.00 |
| ATOM | 6903 | 3HD2 | LEU | 462 | 32.859 | 82.467 | 97.000 | 0.00 | 0.00 |
| ATOM | 6904 | C    | LEU | 462 | 32.995 | 87.134 | 95.812 | 0.00 | 0.00 |
| ATOM | 6905 | O    | LEU | 462 | 32.440 | 86.723 | 94.796 | 0.00 | 0.00 |
| ATOM | 6906 | N    | ALA | 463 | 32.690 | 88.231 | 96.497 | 0.00 | 0.00 |
| ATOM | 6907 | H    | ALA | 463 | 33.237 | 88.560 | 97.280 | 0.00 | 0.00 |
| ATOM | 6908 | CA   | ALA | 463 | 31.476 | 89.083 | 96.113 | 0.00 | 0.00 |
| ATOM | 6909 | HA   | ALA | 463 | 30.714 | 88.445 | 95.666 | 0.00 | 0.00 |
| ATOM | 6910 | CB   | ALA | 463 | 30.983 | 89.603 | 97.372 | 0.00 | 0.00 |
| ATOM | 6911 | HB1  | ALA | 463 | 29.988 | 90.028 | 97.240 | 0.00 | 0.00 |
| ATOM | 6912 | HB2  | ALA | 463 | 30.917 | 88.759 | 98.059 | 0.00 | 0.00 |
| ATOM | 6913 | HB3  | ALA | 463 | 31.671 | 90.297 | 97.855 | 0.00 | 0.00 |
| ATOM | 6914 | C    | ALA | 463 | 31.835 | 90.101 | 95.007 | 0.00 | 0.00 |
| ATOM | 6915 | O    | ALA | 463 | 31.004 | 90.408 | 94.155 | 0.00 | 0.00 |

|      |      |      |     |     |        |        |        |      |      |
|------|------|------|-----|-----|--------|--------|--------|------|------|
| ATOM | 6916 | N    | ALA | 464 | 33.101 | 90.559 | 94.987 | 0.00 | 0.00 |
| ATOM | 6917 | H    | ALA | 464 | 33.752 | 90.538 | 95.758 | 0.00 | 0.00 |
| ATOM | 6918 | CA   | ALA | 464 | 33.640 | 91.201 | 93.794 | 0.00 | 0.00 |
| ATOM | 6919 | HA   | ALA | 464 | 32.927 | 91.952 | 93.454 | 0.00 | 0.00 |
| ATOM | 6920 | CB   | ALA | 464 | 34.974 | 91.827 | 94.241 | 0.00 | 0.00 |
| ATOM | 6921 | HB1  | ALA | 464 | 35.677 | 91.097 | 94.641 | 0.00 | 0.00 |
| ATOM | 6922 | HB2  | ALA | 464 | 35.489 | 92.205 | 93.358 | 0.00 | 0.00 |
| ATOM | 6923 | HB3  | ALA | 464 | 34.704 | 92.530 | 95.029 | 0.00 | 0.00 |
| ATOM | 6924 | C    | ALA | 464 | 33.889 | 90.196 | 92.541 | 0.00 | 0.00 |
| ATOM | 6925 | O    | ALA | 464 | 33.627 | 90.528 | 91.375 | 0.00 | 0.00 |
| ATOM | 6926 | N    | ILE | 465 | 34.287 | 88.976 | 92.850 | 0.00 | 0.00 |
| ATOM | 6927 | H    | ILE | 465 | 34.593 | 88.745 | 93.785 | 0.00 | 0.00 |
| ATOM | 6928 | CA   | ILE | 465 | 34.326 | 87.862 | 91.859 | 0.00 | 0.00 |
| ATOM | 6929 | HA   | ILE | 465 | 34.979 | 88.236 | 91.070 | 0.00 | 0.00 |
| ATOM | 6930 | CB   | ILE | 465 | 35.137 | 86.603 | 92.253 | 0.00 | 0.00 |
| ATOM | 6931 | HB   | ILE | 465 | 34.651 | 86.302 | 93.181 | 0.00 | 0.00 |
| ATOM | 6932 | CG2  | ILE | 465 | 34.964 | 85.429 | 91.248 | 0.00 | 0.00 |
| ATOM | 6933 | 1HG2 | ILE | 465 | 35.025 | 85.781 | 90.218 | 0.00 | 0.00 |
| ATOM | 6934 | 2HG2 | ILE | 465 | 35.691 | 84.660 | 91.513 | 0.00 | 0.00 |
| ATOM | 6935 | 3HG2 | ILE | 465 | 33.998 | 84.950 | 91.404 | 0.00 | 0.00 |
| ATOM | 6936 | CG1  | ILE | 465 | 36.660 | 86.912 | 92.442 | 0.00 | 0.00 |
| ATOM | 6937 | 2HG1 | ILE | 465 | 37.014 | 87.107 | 91.430 | 0.00 | 0.00 |
| ATOM | 6938 | 3HG1 | ILE | 465 | 36.649 | 87.829 | 93.031 | 0.00 | 0.00 |
| ATOM | 6939 | CD1  | ILE | 465 | 37.443 | 85.846 | 93.199 | 0.00 | 0.00 |
| ATOM | 6940 | 1HD1 | ILE | 465 | 38.402 | 86.245 | 93.529 | 0.00 | 0.00 |
| ATOM | 6941 | 2HD1 | ILE | 465 | 36.794 | 85.634 | 94.049 | 0.00 | 0.00 |

ATOM 6942 3HD1 ILE 465 37.520 84.910 92.646 0.00 0.00  
ATOM 6943 C ILE 465 33.006 87.569 91.182 0.00 0.00  
ATOM 6944 O ILE 465 32.894 87.445 89.986 0.00 0.00  
ATOM 6945 N GLY 466 31.907 87.695 91.995 0.00 0.00  
ATOM 6946 H GLY 466 32.030 87.861 92.984 0.00 0.00  
ATOM 6947 CA GLY 466 30.508 87.840 91.503 0.00 0.00  
ATOM 6948 HA2 GLY 466 29.759 87.906 92.292 0.00 0.00  
ATOM 6949 HA3 GLY 466 30.484 88.749 90.901 0.00 0.00  
ATOM 6950 C GLY 466 30.018 86.635 90.672 0.00 0.00  
ATOM 6951 O GLY 466 29.546 86.744 89.495 0.00 0.00  
ATOM 6952 N GLY 467 30.203 85.445 91.185 0.00 0.00  
ATOM 6953 H GLY 467 30.779 85.294 92.001 0.00 0.00  
ATOM 6954 CA GLY 467 29.736 84.255 90.452 0.00 0.00  
ATOM 6955 HA2 GLY 467 29.970 83.440 91.137 0.00 0.00  
ATOM 6956 HA3 GLY 467 28.659 84.345 90.308 0.00 0.00  
ATOM 6957 C GLY 467 30.419 83.986 89.137 0.00 0.00  
ATOM 6958 O GLY 467 29.976 83.084 88.366 0.00 0.00  
ATOM 6959 N ARG 468 31.487 84.692 88.745 0.00 0.00  
ATOM 6960 H ARG 468 31.822 85.404 89.378 0.00 0.00  
ATOM 6961 CA ARG 468 32.151 84.508 87.438 0.00 0.00  
ATOM 6962 HA ARG 468 31.477 84.047 86.717 0.00 0.00  
ATOM 6963 CB ARG 468 32.450 85.883 86.865 0.00 0.00  
ATOM 6964 HB2 ARG 468 33.081 86.405 87.585 0.00 0.00  
ATOM 6965 HB3 ARG 468 32.945 85.733 85.906 0.00 0.00  
ATOM 6966 CG ARG 468 31.180 86.698 86.580 0.00 0.00  
ATOM 6967 HG2 ARG 468 30.863 86.352 85.596 0.00 0.00

|      |      |      |     |     |        |        |        |      |      |
|------|------|------|-----|-----|--------|--------|--------|------|------|
| ATOM | 6968 | HG3  | ARG | 468 | 30.243 | 86.570 | 87.121 | 0.00 | 0.00 |
| ATOM | 6969 | CD   | ARG | 468 | 31.384 | 88.210 | 86.408 | 0.00 | 0.00 |
| ATOM | 6970 | HD2  | ARG | 468 | 31.996 | 88.425 | 85.532 | 0.00 | 0.00 |
| ATOM | 6971 | HD3  | ARG | 468 | 30.389 | 88.649 | 86.328 | 0.00 | 0.00 |
| ATOM | 6972 | NE   | ARG | 468 | 32.062 | 88.832 | 87.553 | 0.00 | 0.00 |
| ATOM | 6973 | HE   | ARG | 468 | 32.128 | 88.279 | 88.396 | 0.00 | 0.00 |
| ATOM | 6974 | CZ   | ARG | 468 | 32.778 | 89.993 | 87.604 | 0.00 | 0.00 |
| ATOM | 6975 | NH1  | ARG | 468 | 32.672 | 90.872 | 86.615 | 0.00 | 0.00 |
| ATOM | 6976 | 1HH1 | ARG | 468 | 33.082 | 91.774 | 86.814 | 0.00 | 0.00 |
| ATOM | 6977 | 2HH1 | ARG | 468 | 32.319 | 90.593 | 85.711 | 0.00 | 0.00 |
| ATOM | 6978 | NH2  | ARG | 468 | 33.388 | 90.373 | 88.608 | 0.00 | 0.00 |
| ATOM | 6979 | 1HH2 | ARG | 468 | 33.759 | 91.311 | 88.552 | 0.00 | 0.00 |
| ATOM | 6980 | 2HH2 | ARG | 468 | 33.233 | 89.918 | 89.496 | 0.00 | 0.00 |
| ATOM | 6981 | C    | ARG | 468 | 33.298 | 83.556 | 87.373 | 0.00 | 0.00 |
| ATOM | 6982 | O    | ARG | 468 | 33.845 | 83.272 | 88.409 | 0.00 | 0.00 |
| ATOM | 6983 | N    | THR | 469 | 33.563 | 82.953 | 86.234 | 0.00 | 0.00 |
| ATOM | 6984 | H    | THR | 469 | 32.868 | 83.120 | 85.521 | 0.00 | 0.00 |
| ATOM | 6985 | CA   | THR | 469 | 34.305 | 81.666 | 86.229 | 0.00 | 0.00 |
| ATOM | 6986 | HA   | THR | 469 | 33.825 | 80.990 | 86.937 | 0.00 | 0.00 |
| ATOM | 6987 | CB   | THR | 469 | 34.057 | 81.018 | 84.905 | 0.00 | 0.00 |
| ATOM | 6988 | HB   | THR | 469 | 34.591 | 81.614 | 84.166 | 0.00 | 0.00 |
| ATOM | 6989 | CG2  | THR | 469 | 34.755 | 79.705 | 84.884 | 0.00 | 0.00 |
| ATOM | 6990 | 1HG2 | THR | 469 | 34.605 | 79.210 | 83.924 | 0.00 | 0.00 |
| ATOM | 6991 | 2HG2 | THR | 469 | 35.802 | 79.832 | 85.160 | 0.00 | 0.00 |
| ATOM | 6992 | 3HG2 | THR | 469 | 34.328 | 79.103 | 85.685 | 0.00 | 0.00 |
| ATOM | 6993 | OG1  | THR | 469 | 32.713 | 80.799 | 84.532 | 0.00 | 0.00 |



|      |      |      |     |     |        |        |        |      |      |
|------|------|------|-----|-----|--------|--------|--------|------|------|
| ATOM | 6994 | HG1  | THR | 469 | 32.322 | 81.655 | 84.342 | 0.00 | 0.00 |
| ATOM | 6995 | C    | THR | 469 | 35.792 | 81.889 | 86.531 | 0.00 | 0.00 |
| ATOM | 6996 | O    | THR | 469 | 36.334 | 82.859 | 85.999 | 0.00 | 0.00 |
| ATOM | 6997 | N    | ILE | 470 | 36.500 | 81.184 | 87.402 | 0.00 | 0.00 |
| ATOM | 6998 | H    | ILE | 470 | 35.924 | 80.458 | 87.804 | 0.00 | 0.00 |
| ATOM | 6999 | CA   | ILE | 470 | 37.827 | 81.608 | 87.835 | 0.00 | 0.00 |
| ATOM | 7000 | HA   | ILE | 470 | 38.371 | 81.972 | 86.964 | 0.00 | 0.00 |
| ATOM | 7001 | CB   | ILE | 470 | 37.771 | 82.787 | 88.814 | 0.00 | 0.00 |
| ATOM | 7002 | HB   | ILE | 470 | 37.082 | 83.500 | 88.359 | 0.00 | 0.00 |
| ATOM | 7003 | CG2  | ILE | 470 | 37.241 | 82.399 | 90.159 | 0.00 | 0.00 |
| ATOM | 7004 | 1HG2 | ILE | 470 | 36.312 | 81.859 | 89.979 | 0.00 | 0.00 |
| ATOM | 7005 | 2HG2 | ILE | 470 | 38.020 | 81.805 | 90.636 | 0.00 | 0.00 |
| ATOM | 7006 | 3HG2 | ILE | 470 | 37.010 | 83.241 | 90.811 | 0.00 | 0.00 |
| ATOM | 7007 | CG1  | ILE | 470 | 39.123 | 83.504 | 89.072 | 0.00 | 0.00 |
| ATOM | 7008 | 2HG1 | ILE | 470 | 39.809 | 82.753 | 89.464 | 0.00 | 0.00 |
| ATOM | 7009 | 3HG1 | ILE | 470 | 39.556 | 83.891 | 88.150 | 0.00 | 0.00 |
| ATOM | 7010 | CD1  | ILE | 470 | 39.083 | 84.596 | 90.140 | 0.00 | 0.00 |
| ATOM | 7011 | 1HD1 | ILE | 470 | 40.000 | 85.180 | 90.053 | 0.00 | 0.00 |
| ATOM | 7012 | 2HD1 | ILE | 470 | 38.311 | 85.326 | 89.899 | 0.00 | 0.00 |
| ATOM | 7013 | 3HD1 | ILE | 470 | 38.903 | 84.157 | 91.121 | 0.00 | 0.00 |
| ATOM | 7014 | C    | ILE | 470 | 38.701 | 80.410 | 88.354 | 0.00 | 0.00 |
| ATOM | 7015 | O    | ILE | 470 | 38.283 | 79.599 | 89.178 | 0.00 | 0.00 |
| ATOM | 7016 | N    | HID | 471 | 39.951 | 80.369 | 87.957 | 0.00 | 0.00 |
| ATOM | 7017 | H    | HID | 471 | 40.329 | 81.079 | 87.347 | 0.00 | 0.00 |
| ATOM | 7018 | CA   | HID | 471 | 40.913 | 79.376 | 88.395 | 0.00 | 0.00 |
| ATOM | 7019 | HA   | HID | 471 | 40.307 | 78.539 | 88.742 | 0.00 | 0.00 |

|      |      |      |     |     |        |        |        |      |      |
|------|------|------|-----|-----|--------|--------|--------|------|------|
| ATOM | 7020 | CB   | HID | 471 | 41.855 | 78.925 | 87.255 | 0.00 | 0.00 |
| ATOM | 7021 | HB2  | HID | 471 | 41.219 | 78.764 | 86.384 | 0.00 | 0.00 |
| ATOM | 7022 | HB3  | HID | 471 | 42.452 | 79.769 | 86.908 | 0.00 | 0.00 |
| ATOM | 7023 | CG   | HID | 471 | 42.687 | 77.647 | 87.336 | 0.00 | 0.00 |
| ATOM | 7024 | ND1  | HID | 471 | 43.551 | 77.173 | 86.412 | 0.00 | 0.00 |
| ATOM | 7025 | HD1  | HID | 471 | 43.653 | 77.375 | 85.427 | 0.00 | 0.00 |
| ATOM | 7026 | CE1  | HID | 471 | 44.212 | 76.073 | 86.936 | 0.00 | 0.00 |
| ATOM | 7027 | HE1  | HID | 471 | 44.982 | 75.466 | 86.483 | 0.00 | 0.00 |
| ATOM | 7028 | NE2  | HID | 471 | 43.878 | 75.973 | 88.212 | 0.00 | 0.00 |
| ATOM | 7029 | CD2  | HID | 471 | 42.915 | 76.935 | 88.470 | 0.00 | 0.00 |
| ATOM | 7030 | HD2  | HID | 471 | 42.655 | 77.267 | 89.464 | 0.00 | 0.00 |
| ATOM | 7031 | C    | HID | 471 | 41.579 | 79.979 | 89.729 | 0.00 | 0.00 |
| ATOM | 7032 | O    | HID | 471 | 42.239 | 80.983 | 89.718 | 0.00 | 0.00 |
| ATOM | 7033 | N    | THR | 472 | 41.385 | 79.294 | 90.829 | 0.00 | 0.00 |
| ATOM | 7034 | H    | THR | 472 | 40.832 | 78.449 | 90.854 | 0.00 | 0.00 |
| ATOM | 7035 | CA   | THR | 472 | 42.143 | 79.649 | 91.978 | 0.00 | 0.00 |
| ATOM | 7036 | HA   | THR | 472 | 42.429 | 80.699 | 91.922 | 0.00 | 0.00 |
| ATOM | 7037 | CB   | THR | 472 | 41.235 | 79.578 | 93.284 | 0.00 | 0.00 |
| ATOM | 7038 | HB   | THR | 472 | 41.936 | 79.642 | 94.117 | 0.00 | 0.00 |
| ATOM | 7039 | CG2  | THR | 472 | 40.306 | 80.789 | 93.372 | 0.00 | 0.00 |
| ATOM | 7040 | 1HG2 | THR | 472 | 39.787 | 80.808 | 92.414 | 0.00 | 0.00 |
| ATOM | 7041 | 2HG2 | THR | 472 | 39.632 | 80.532 | 94.189 | 0.00 | 0.00 |
| ATOM | 7042 | 3HG2 | THR | 472 | 40.925 | 81.632 | 93.680 | 0.00 | 0.00 |
| ATOM | 7043 | OG1  | THR | 472 | 40.521 | 78.424 | 93.468 | 0.00 | 0.00 |
| ATOM | 7044 | HG1  | THR | 472 | 41.161 | 77.773 | 93.765 | 0.00 | 0.00 |
| ATOM | 7045 | C    | THR | 472 | 43.299 | 78.645 | 91.967 | 0.00 | 0.00 |

|      |      |     |     |     |        |        |        |      |      |
|------|------|-----|-----|-----|--------|--------|--------|------|------|
| ATOM | 7046 | O   | THR | 472 | 43.098 | 77.439 | 92.067 | 0.00 | 0.00 |
| ATOM | 7047 | N   | PHE | 473 | 44.504 | 79.149 | 91.874 | 0.00 | 0.00 |
| ATOM | 7048 | H   | PHE | 473 | 44.613 | 80.130 | 91.656 | 0.00 | 0.00 |
| ATOM | 7049 | CA  | PHE | 473 | 45.778 | 78.414 | 92.114 | 0.00 | 0.00 |
| ATOM | 7050 | HA  | PHE | 473 | 45.846 | 77.369 | 91.813 | 0.00 | 0.00 |
| ATOM | 7051 | CB  | PHE | 473 | 46.883 | 79.153 | 91.405 | 0.00 | 0.00 |
| ATOM | 7052 | HB2 | PHE | 473 | 46.937 | 80.152 | 91.837 | 0.00 | 0.00 |
| ATOM | 7053 | HB3 | PHE | 473 | 47.812 | 78.661 | 91.693 | 0.00 | 0.00 |
| ATOM | 7054 | CG  | PHE | 473 | 46.941 | 79.125 | 89.908 | 0.00 | 0.00 |
| ATOM | 7055 | CD1 | PHE | 473 | 47.216 | 80.244 | 89.176 | 0.00 | 0.00 |
| ATOM | 7056 | HD1 | PHE | 473 | 47.492 | 81.172 | 89.655 | 0.00 | 0.00 |
| ATOM | 7057 | CE1 | PHE | 473 | 47.076 | 80.268 | 87.777 | 0.00 | 0.00 |
| ATOM | 7058 | HE1 | PHE | 473 | 47.234 | 81.196 | 87.247 | 0.00 | 0.00 |
| ATOM | 7059 | CZ  | PHE | 473 | 46.854 | 79.078 | 87.093 | 0.00 | 0.00 |
| ATOM | 7060 | HZ  | PHE | 473 | 46.776 | 79.076 | 86.015 | 0.00 | 0.00 |
| ATOM | 7061 | CE2 | PHE | 473 | 46.657 | 77.882 | 87.799 | 0.00 | 0.00 |
| ATOM | 7062 | HE2 | PHE | 473 | 46.555 | 76.949 | 87.265 | 0.00 | 0.00 |
| ATOM | 7063 | CD2 | PHE | 473 | 46.819 | 77.891 | 89.188 | 0.00 | 0.00 |
| ATOM | 7064 | HD2 | PHE | 473 | 46.778 | 76.987 | 89.778 | 0.00 | 0.00 |
| ATOM | 7065 | C   | PHE | 473 | 45.940 | 78.304 | 93.635 | 0.00 | 0.00 |
| ATOM | 7066 | O   | PHE | 473 | 45.471 | 79.189 | 94.406 | 0.00 | 0.00 |
| ATOM | 7067 | N   | H12 | 474 | 46.582 | 77.163 | 94.011 | 0.00 | 0.00 |
| ATOM | 7068 | H   | H12 | 474 | 46.581 | 76.377 | 93.377 | 0.00 | 0.00 |
| ATOM | 7069 | CA  | H12 | 474 | 47.168 | 76.876 | 95.315 | 0.00 | 0.00 |
| ATOM | 7070 | HA  | H12 | 474 | 47.351 | 75.803 | 95.271 | 0.00 | 0.00 |
| ATOM | 7071 | CB  | H12 | 474 | 48.568 | 77.470 | 95.333 | 0.00 | 0.00 |

|      |      |      |     |     |        |        |        |      |      |
|------|------|------|-----|-----|--------|--------|--------|------|------|
| ATOM | 7072 | HB2  | H12 | 474 | 49.000 | 77.445 | 96.334 | 0.00 | 0.00 |
| ATOM | 7073 | HB3  | H12 | 474 | 49.266 | 76.954 | 94.673 | 0.00 | 0.00 |
| ATOM | 7074 | CG   | H12 | 474 | 48.730 | 78.918 | 94.854 | 0.00 | 0.00 |
| ATOM | 7075 | ND1  | H12 | 474 | 48.076 | 80.021 | 95.354 | 0.00 | 0.00 |
| ATOM | 7076 | HD1  | H12 | 474 | 47.216 | 80.047 | 95.882 | 0.00 | 0.00 |
| ATOM | 7077 | CE1  | H12 | 474 | 48.736 | 81.112 | 94.785 | 0.00 | 0.00 |
| ATOM | 7078 | HE1  | H12 | 474 | 48.415 | 82.131 | 94.937 | 0.00 | 0.00 |
| ATOM | 7079 | NE2  | H12 | 474 | 49.829 | 80.773 | 94.107 | 0.00 | 0.00 |
| ATOM | 7080 | CD2  | H12 | 474 | 49.858 | 79.381 | 94.216 | 0.00 | 0.00 |
| ATOM | 7081 | HD2  | H12 | 474 | 50.696 | 78.808 | 93.848 | 0.00 | 0.00 |
| ATOM | 7082 | C    | H12 | 474 | 46.240 | 77.309 | 96.407 | 0.00 | 0.00 |
| ATOM | 7083 | O    | H12 | 474 | 46.552 | 78.251 | 97.160 | 0.00 | 0.00 |
| ATOM | 7084 | N    | THR | 475 | 45.110 | 76.686 | 96.552 | 0.00 | 0.00 |
| ATOM | 7085 | H    | THR | 475 | 44.961 | 75.907 | 95.927 | 0.00 | 0.00 |
| ATOM | 7086 | CA   | THR | 475 | 43.931 | 77.104 | 97.345 | 0.00 | 0.00 |
| ATOM | 7087 | HA   | THR | 475 | 43.929 | 78.194 | 97.346 | 0.00 | 0.00 |
| ATOM | 7088 | CB   | THR | 475 | 42.693 | 76.641 | 96.595 | 0.00 | 0.00 |
| ATOM | 7089 | HB   | THR | 475 | 42.618 | 75.554 | 96.574 | 0.00 | 0.00 |
| ATOM | 7090 | CG2  | THR | 475 | 41.350 | 77.002 | 97.139 | 0.00 | 0.00 |
| ATOM | 7091 | 1HG2 | THR | 475 | 41.072 | 78.029 | 96.905 | 0.00 | 0.00 |
| ATOM | 7092 | 2HG2 | THR | 475 | 40.627 | 76.422 | 96.564 | 0.00 | 0.00 |
| ATOM | 7093 | 3HG2 | THR | 475 | 41.218 | 76.903 | 98.217 | 0.00 | 0.00 |
| ATOM | 7094 | OG1  | THR | 475 | 42.664 | 77.038 | 95.231 | 0.00 | 0.00 |
| ATOM | 7095 | HG1  | THR | 475 | 43.420 | 76.530 | 94.927 | 0.00 | 0.00 |
| ATOM | 7096 | C    | THR | 475 | 44.020 | 76.844 | 98.843 | 0.00 | 0.00 |
| ATOM | 7097 | O    | THR | 475 | 43.141 | 77.348 | 99.622 | 0.00 | 0.00 |

|      |      |     |     |     |        |        |         |      |      |
|------|------|-----|-----|-----|--------|--------|---------|------|------|
| ATOM | 7098 | N   | GLU | 476 | 44.954 | 76.093 | 99.413  | 0.00 | 0.00 |
| ATOM | 7099 | H   | GLU | 476 | 45.637 | 75.642 | 98.821  | 0.00 | 0.00 |
| ATOM | 7100 | CA  | GLU | 476 | 45.197 | 76.037 | 100.908 | 0.00 | 0.00 |
| ATOM | 7101 | HA  | GLU | 476 | 44.320 | 75.661 | 101.434 | 0.00 | 0.00 |
| ATOM | 7102 | CB  | GLU | 476 | 46.306 | 75.010 | 101.258 | 0.00 | 0.00 |
| ATOM | 7103 | HB2 | GLU | 476 | 46.117 | 74.053 | 100.774 | 0.00 | 0.00 |
| ATOM | 7104 | HB3 | GLU | 476 | 47.188 | 75.508 | 100.855 | 0.00 | 0.00 |
| ATOM | 7105 | CG  | GLU | 476 | 46.458 | 74.598 | 102.674 | 0.00 | 0.00 |
| ATOM | 7106 | HG2 | GLU | 476 | 45.487 | 74.460 | 103.149 | 0.00 | 0.00 |
| ATOM | 7107 | HG3 | GLU | 476 | 47.130 | 73.742 | 102.611 | 0.00 | 0.00 |
| ATOM | 7108 | CD  | GLU | 476 | 47.153 | 75.587 | 103.547 | 0.00 | 0.00 |
| ATOM | 7109 | OE1 | GLU | 476 | 48.160 | 76.207 | 103.123 | 0.00 | 0.00 |
| ATOM | 7110 | OE2 | GLU | 476 | 46.634 | 75.914 | 104.636 | 0.00 | 0.00 |
| ATOM | 7111 | C   | GLU | 476 | 45.611 | 77.399 | 101.529 | 0.00 | 0.00 |
| ATOM | 7112 | O   | GLU | 476 | 45.134 | 77.909 | 102.565 | 0.00 | 0.00 |
| ATOM | 7113 | N   | GLY | 477 | 46.465 | 78.120 | 100.792 | 0.00 | 0.00 |
| ATOM | 7114 | H   | GLY | 477 | 46.712 | 77.667 | 99.924  | 0.00 | 0.00 |
| ATOM | 7115 | CA  | GLY | 477 | 46.910 | 79.488 | 101.093 | 0.00 | 0.00 |
| ATOM | 7116 | HA2 | GLY | 477 | 46.718 | 80.119 | 100.225 | 0.00 | 0.00 |
| ATOM | 7117 | HA3 | GLY | 477 | 46.396 | 79.865 | 101.976 | 0.00 | 0.00 |
| ATOM | 7118 | C   | GLY | 477 | 48.428 | 79.608 | 101.269 | 0.00 | 0.00 |
| ATOM | 7119 | O   | GLY | 477 | 48.914 | 80.653 | 100.894 | 0.00 | 0.00 |
| ATOM | 7120 | N   | ALA | 478 | 49.141 | 78.495 | 101.604 | 0.00 | 0.00 |
| ATOM | 7121 | H   | ALA | 478 | 48.677 | 77.652 | 101.911 | 0.00 | 0.00 |
| ATOM | 7122 | CA  | ALA | 478 | 50.622 | 78.391 | 101.763 | 0.00 | 0.00 |
| ATOM | 7123 | HA  | ALA | 478 | 50.857 | 79.050 | 102.599 | 0.00 | 0.00 |

|      |      |     |     |     |        |        |         |      |      |
|------|------|-----|-----|-----|--------|--------|---------|------|------|
| ATOM | 7124 | CB  | ALA | 478 | 50.984 | 76.947 | 102.175 | 0.00 | 0.00 |
| ATOM | 7125 | HB1 | ALA | 478 | 50.695 | 76.149 | 101.491 | 0.00 | 0.00 |
| ATOM | 7126 | HB2 | ALA | 478 | 52.067 | 76.834 | 102.227 | 0.00 | 0.00 |
| ATOM | 7127 | HB3 | ALA | 478 | 50.461 | 76.683 | 103.094 | 0.00 | 0.00 |
| ATOM | 7128 | C   | ALA | 478 | 51.360 | 78.789 | 100.524 | 0.00 | 0.00 |
| ATOM | 7129 | O   | ALA | 478 | 52.344 | 79.618 | 100.446 | 0.00 | 0.00 |
| ATOM | 7130 | N   | GLY | 479 | 50.910 | 78.230 | 99.402  | 0.00 | 0.00 |
| ATOM | 7131 | H   | GLY | 479 | 50.240 | 77.475 | 99.384  | 0.00 | 0.00 |
| ATOM | 7132 | CA  | GLY | 479 | 51.453 | 78.687 | 98.120  | 0.00 | 0.00 |
| ATOM | 7133 | HA2 | GLY | 479 | 52.537 | 78.631 | 98.221  | 0.00 | 0.00 |
| ATOM | 7134 | HA3 | GLY | 479 | 51.225 | 77.960 | 97.340  | 0.00 | 0.00 |
| ATOM | 7135 | C   | GLY | 479 | 50.967 | 80.042 | 97.703  | 0.00 | 0.00 |
| ATOM | 7136 | O   | GLY | 479 | 51.751 | 80.802 | 97.182  | 0.00 | 0.00 |
| ATOM | 7137 | N   | GLY | 480 | 49.721 | 80.417 | 98.081  | 0.00 | 0.00 |
| ATOM | 7138 | H   | GLY | 480 | 49.176 | 79.727 | 98.577  | 0.00 | 0.00 |
| ATOM | 7139 | CA  | GLY | 480 | 49.141 | 81.737 | 97.906  | 0.00 | 0.00 |
| ATOM | 7140 | HA2 | GLY | 480 | 49.758 | 82.396 | 98.517  | 0.00 | 0.00 |
| ATOM | 7141 | HA3 | GLY | 480 | 49.355 | 81.992 | 96.868  | 0.00 | 0.00 |
| ATOM | 7142 | C   | GLY | 480 | 47.655 | 81.938 | 98.202  | 0.00 | 0.00 |
| ATOM | 7143 | O   | GLY | 480 | 46.747 | 81.320 | 97.763  | 0.00 | 0.00 |
| ATOM | 7144 | N   | GLY | 481 | 47.471 | 83.000 | 99.059  | 0.00 | 0.00 |
| ATOM | 7145 | H   | GLY | 481 | 48.281 | 83.409 | 99.502  | 0.00 | 0.00 |
| ATOM | 7146 | CA  | GLY | 481 | 46.112 | 83.507 | 99.257  | 0.00 | 0.00 |
| ATOM | 7147 | HA2 | GLY | 481 | 45.922 | 84.153 | 98.400  | 0.00 | 0.00 |
| ATOM | 7148 | HA3 | GLY | 481 | 45.274 | 82.813 | 99.219  | 0.00 | 0.00 |
| ATOM | 7149 | C   | GLY | 481 | 45.923 | 84.306 | 100.548 | 0.00 | 0.00 |

|      |      |     |     |     |        |        |         |      |      |
|------|------|-----|-----|-----|--------|--------|---------|------|------|
| ATOM | 7150 | O   | GLY | 481 | 46.967 | 84.461 | 101.194 | 0.00 | 0.00 |
| ATOM | 7151 | N   | HIP | 482 | 44.742 | 84.859 | 100.818 | 0.00 | 0.00 |
| ATOM | 7152 | H   | HIP | 482 | 44.000 | 84.775 | 100.138 | 0.00 | 0.00 |
| ATOM | 7153 | CA  | HIP | 482 | 44.511 | 85.475 | 102.159 | 0.00 | 0.00 |
| ATOM | 7154 | HA  | HIP | 482 | 45.153 | 86.353 | 102.224 | 0.00 | 0.00 |
| ATOM | 7155 | CB  | HIP | 482 | 42.968 | 85.728 | 102.318 | 0.00 | 0.00 |
| ATOM | 7156 | HB2 | HIP | 482 | 42.461 | 84.859 | 101.898 | 0.00 | 0.00 |
| ATOM | 7157 | HB3 | HIP | 482 | 42.816 | 85.822 | 103.393 | 0.00 | 0.00 |
| ATOM | 7158 | CG  | HIP | 482 | 42.431 | 86.971 | 101.627 | 0.00 | 0.00 |
| ATOM | 7159 | ND1 | HIP | 482 | 43.124 | 87.964 | 101.039 | 0.00 | 0.00 |
| ATOM | 7160 | HD1 | HIP | 482 | 44.130 | 87.991 | 100.951 | 0.00 | 0.00 |
| ATOM | 7161 | CE1 | HIP | 482 | 42.265 | 88.753 | 100.415 | 0.00 | 0.00 |
| ATOM | 7162 | HE1 | HIP | 482 | 42.508 | 89.587 | 99.775  | 0.00 | 0.00 |
| ATOM | 7163 | NE2 | HIP | 482 | 41.040 | 88.445 | 100.736 | 0.00 | 0.00 |
| ATOM | 7164 | HE2 | HIP | 482 | 40.164 | 88.800 | 100.378 | 0.00 | 0.00 |
| ATOM | 7165 | CD2 | HIP | 482 | 41.135 | 87.196 | 101.436 | 0.00 | 0.00 |
| ATOM | 7166 | HD2 | HIP | 482 | 40.386 | 86.494 | 101.770 | 0.00 | 0.00 |
| ATOM | 7167 | C   | HIP | 482 | 44.930 | 84.605 | 103.338 | 0.00 | 0.00 |
| ATOM | 7168 | O   | HIP | 482 | 44.643 | 83.444 | 103.338 | 0.00 | 0.00 |
| ATOM | 7169 | N   | ALA | 483 | 45.427 | 85.158 | 104.442 | 0.00 | 0.00 |
| ATOM | 7170 | H   | ALA | 483 | 45.540 | 86.160 | 104.391 | 0.00 | 0.00 |
| ATOM | 7171 | CA  | ALA | 483 | 45.712 | 84.422 | 105.727 | 0.00 | 0.00 |
| ATOM | 7172 | HA  | ALA | 483 | 45.550 | 83.359 | 105.547 | 0.00 | 0.00 |
| ATOM | 7173 | CB  | ALA | 483 | 47.139 | 84.520 | 106.203 | 0.00 | 0.00 |
| ATOM | 7174 | HB1 | ALA | 483 | 47.345 | 83.788 | 106.984 | 0.00 | 0.00 |
| ATOM | 7175 | HB2 | ALA | 483 | 47.841 | 84.363 | 105.385 | 0.00 | 0.00 |

|      |      |     |     |     |        |        |         |      |      |
|------|------|-----|-----|-----|--------|--------|---------|------|------|
| ATOM | 7176 | HB3 | ALA | 483 | 47.366 | 85.513 | 106.592 | 0.00 | 0.00 |
| ATOM | 7177 | C   | ALA | 483 | 44.830 | 84.886 | 106.917 | 0.00 | 0.00 |
| ATOM | 7178 | O   | ALA | 483 | 44.534 | 86.056 | 107.049 | 0.00 | 0.00 |
| ATOM | 7179 | N   | PRO | 484 | 44.240 | 84.004 | 107.706 | 0.00 | 0.00 |
| ATOM | 7180 | CD  | PRO | 484 | 43.509 | 84.444 | 108.955 | 0.00 | 0.00 |
| ATOM | 7181 | HD2 | PRO | 484 | 44.049 | 85.158 | 109.578 | 0.00 | 0.00 |
| ATOM | 7182 | HD3 | PRO | 484 | 42.492 | 84.816 | 108.831 | 0.00 | 0.00 |
| ATOM | 7183 | CG  | PRO | 484 | 43.316 | 83.155 | 109.713 | 0.00 | 0.00 |
| ATOM | 7184 | HG2 | PRO | 484 | 43.746 | 83.214 | 110.713 | 0.00 | 0.00 |
| ATOM | 7185 | HG3 | PRO | 484 | 42.299 | 82.764 | 109.750 | 0.00 | 0.00 |
| ATOM | 7186 | CB  | PRO | 484 | 44.216 | 82.072 | 109.075 | 0.00 | 0.00 |
| ATOM | 7187 | HB2 | PRO | 484 | 45.215 | 82.141 | 109.507 | 0.00 | 0.00 |
| ATOM | 7188 | HB3 | PRO | 484 | 43.831 | 81.053 | 109.105 | 0.00 | 0.00 |
| ATOM | 7189 | CA  | PRO | 484 | 44.210 | 82.573 | 107.602 | 0.00 | 0.00 |
| ATOM | 7190 | HA  | PRO | 484 | 45.117 | 82.173 | 107.148 | 0.00 | 0.00 |
| ATOM | 7191 | C   | PRO | 484 | 43.143 | 81.814 | 106.681 | 0.00 | 0.00 |
| ATOM | 7192 | O   | PRO | 484 | 42.571 | 80.727 | 107.019 | 0.00 | 0.00 |
| ATOM | 7193 | N   | ASP | 485 | 42.707 | 82.572 | 105.676 | 0.00 | 0.00 |
| ATOM | 7194 | H   | ASP | 485 | 43.198 | 83.425 | 105.449 | 0.00 | 0.00 |
| ATOM | 7195 | CA  | ASP | 485 | 41.321 | 82.341 | 105.281 | 0.00 | 0.00 |
| ATOM | 7196 | HA  | ASP | 485 | 40.946 | 81.346 | 105.522 | 0.00 | 0.00 |
| ATOM | 7197 | CB  | ASP | 485 | 40.509 | 83.411 | 106.138 | 0.00 | 0.00 |
| ATOM | 7198 | HB2 | ASP | 485 | 40.647 | 83.185 | 107.195 | 0.00 | 0.00 |
| ATOM | 7199 | HB3 | ASP | 485 | 40.802 | 84.424 | 105.864 | 0.00 | 0.00 |
| ATOM | 7200 | CG  | ASP | 485 | 39.067 | 83.367 | 105.901 | 0.00 | 0.00 |
| ATOM | 7201 | OD1 | ASP | 485 | 38.398 | 84.455 | 105.894 | 0.00 | 0.00 |



|      |      |      |     |     |        |        |         |      |      |
|------|------|------|-----|-----|--------|--------|---------|------|------|
| ATOM | 7202 | OD2  | ASP | 485 | 38.551 | 82.262 | 105.663 | 0.00 | 0.00 |
| ATOM | 7203 | C    | ASP | 485 | 41.147 | 82.503 | 103.745 | 0.00 | 0.00 |
| ATOM | 7204 | O    | ASP | 485 | 40.800 | 83.603 | 103.182 | 0.00 | 0.00 |
| ATOM | 7205 | N    | ILE | 486 | 41.264 | 81.369 | 103.035 | 0.00 | 0.00 |
| ATOM | 7206 | H    | ILE | 486 | 41.358 | 80.503 | 103.546 | 0.00 | 0.00 |
| ATOM | 7207 | CA   | ILE | 486 | 40.914 | 81.253 | 101.646 | 0.00 | 0.00 |
| ATOM | 7208 | HA   | ILE | 486 | 40.080 | 81.953 | 101.596 | 0.00 | 0.00 |
| ATOM | 7209 | CB   | ILE | 486 | 42.144 | 81.693 | 100.815 | 0.00 | 0.00 |
| ATOM | 7210 | HB   | ILE | 486 | 42.302 | 82.719 | 101.148 | 0.00 | 0.00 |
| ATOM | 7211 | CG2  | ILE | 486 | 43.298 | 80.721 | 100.996 | 0.00 | 0.00 |
| ATOM | 7212 | 1HG2 | ILE | 486 | 44.137 | 81.060 | 100.387 | 0.00 | 0.00 |
| ATOM | 7213 | 2HG2 | ILE | 486 | 43.761 | 80.653 | 101.980 | 0.00 | 0.00 |
| ATOM | 7214 | 3HG2 | ILE | 486 | 43.057 | 79.724 | 100.628 | 0.00 | 0.00 |
| ATOM | 7215 | CG1  | ILE | 486 | 41.922 | 81.728 | 99.305  | 0.00 | 0.00 |
| ATOM | 7216 | 2HG1 | ILE | 486 | 42.747 | 82.339 | 98.938  | 0.00 | 0.00 |
| ATOM | 7217 | 3HG1 | ILE | 486 | 42.027 | 80.723 | 98.895  | 0.00 | 0.00 |
| ATOM | 7218 | CD1  | ILE | 486 | 40.724 | 82.655 | 98.879  | 0.00 | 0.00 |
| ATOM | 7219 | 1HD1 | ILE | 486 | 41.018 | 83.690 | 99.054  | 0.00 | 0.00 |
| ATOM | 7220 | 2HD1 | ILE | 486 | 40.624 | 82.405 | 97.822  | 0.00 | 0.00 |
| ATOM | 7221 | 3HD1 | ILE | 486 | 39.804 | 82.443 | 99.424  | 0.00 | 0.00 |
| ATOM | 7222 | C    | ILE | 486 | 40.313 | 79.914 | 101.198 | 0.00 | 0.00 |
| ATOM | 7223 | O    | ILE | 486 | 39.522 | 79.922 | 100.245 | 0.00 | 0.00 |
| ATOM | 7224 | N    | ILE | 487 | 40.480 | 78.728 | 101.860 | 0.00 | 0.00 |
| ATOM | 7225 | H    | ILE | 487 | 41.120 | 78.722 | 102.642 | 0.00 | 0.00 |
| ATOM | 7226 | CA   | ILE | 487 | 40.097 | 77.471 | 101.304 | 0.00 | 0.00 |
| ATOM | 7227 | HA   | ILE | 487 | 40.371 | 77.398 | 100.252 | 0.00 | 0.00 |

|      |      |      |     |     |        |        |         |      |      |
|------|------|------|-----|-----|--------|--------|---------|------|------|
| ATOM | 7228 | CB   | ILE | 487 | 40.850 | 76.364 | 102.134 | 0.00 | 0.00 |
| ATOM | 7229 | HB   | ILE | 487 | 41.887 | 76.696 | 102.161 | 0.00 | 0.00 |
| ATOM | 7230 | CG2  | ILE | 487 | 40.311 | 76.401 | 103.617 | 0.00 | 0.00 |
| ATOM | 7231 | 1HG2 | ILE | 487 | 40.352 | 77.408 | 104.030 | 0.00 | 0.00 |
| ATOM | 7232 | 2HG2 | ILE | 487 | 39.320 | 75.963 | 103.740 | 0.00 | 0.00 |
| ATOM | 7233 | 3HG2 | ILE | 487 | 41.033 | 75.772 | 104.138 | 0.00 | 0.00 |
| ATOM | 7234 | CG1  | ILE | 487 | 40.865 | 74.945 | 101.455 | 0.00 | 0.00 |
| ATOM | 7235 | 2HG1 | ILE | 487 | 39.838 | 74.686 | 101.201 | 0.00 | 0.00 |
| ATOM | 7236 | 3HG1 | ILE | 487 | 41.336 | 75.145 | 100.493 | 0.00 | 0.00 |
| ATOM | 7237 | CD1  | ILE | 487 | 41.645 | 73.823 | 102.256 | 0.00 | 0.00 |
| ATOM | 7238 | 1HD1 | ILE | 487 | 40.979 | 73.450 | 103.034 | 0.00 | 0.00 |
| ATOM | 7239 | 2HD1 | ILE | 487 | 41.874 | 73.057 | 101.514 | 0.00 | 0.00 |
| ATOM | 7240 | 3HD1 | ILE | 487 | 42.638 | 74.133 | 102.583 | 0.00 | 0.00 |
| ATOM | 7241 | C    | ILE | 487 | 38.618 | 77.168 | 101.153 | 0.00 | 0.00 |
| ATOM | 7242 | O    | ILE | 487 | 38.207 | 76.493 | 100.263 | 0.00 | 0.00 |
| ATOM | 7243 | N    | THR | 488 | 37.802 | 77.841 | 101.927 | 0.00 | 0.00 |
| ATOM | 7244 | H    | THR | 488 | 38.180 | 78.357 | 102.709 | 0.00 | 0.00 |
| ATOM | 7245 | CA   | THR | 488 | 36.345 | 77.799 | 101.745 | 0.00 | 0.00 |
| ATOM | 7246 | HA   | THR | 488 | 36.240 | 76.729 | 101.564 | 0.00 | 0.00 |
| ATOM | 7247 | CB   | THR | 488 | 35.649 | 78.209 | 103.045 | 0.00 | 0.00 |
| ATOM | 7248 | HB   | THR | 488 | 34.580 | 78.108 | 102.858 | 0.00 | 0.00 |
| ATOM | 7249 | CG2  | THR | 488 | 35.962 | 77.513 | 104.393 | 0.00 | 0.00 |
| ATOM | 7250 | 1HG2 | THR | 488 | 37.051 | 77.525 | 104.449 | 0.00 | 0.00 |
| ATOM | 7251 | 2HG2 | THR | 488 | 35.479 | 78.046 | 105.211 | 0.00 | 0.00 |
| ATOM | 7252 | 3HG2 | THR | 488 | 35.663 | 76.464 | 104.388 | 0.00 | 0.00 |
| ATOM | 7253 | OG1  | THR | 488 | 35.920 | 79.564 | 103.184 | 0.00 | 0.00 |

|      |      |     |     |     |        |        |         |      |      |
|------|------|-----|-----|-----|--------|--------|---------|------|------|
| ATOM | 7254 | HG1 | THR | 488 | 35.067 | 79.978 | 103.335 | 0.00 | 0.00 |
| ATOM | 7255 | C   | THR | 488 | 35.721 | 78.351 | 100.448 | 0.00 | 0.00 |
| ATOM | 7256 | O   | THR | 488 | 34.591 | 78.046 | 100.176 | 0.00 | 0.00 |
| ATOM | 7257 | N   | ALA | 489 | 36.508 | 78.932 | 99.603  | 0.00 | 0.00 |
| ATOM | 7258 | H   | ALA | 489 | 37.502 | 78.956 | 99.780  | 0.00 | 0.00 |
| ATOM | 7259 | CA  | ALA | 489 | 36.110 | 79.256 | 98.256  | 0.00 | 0.00 |
| ATOM | 7260 | HA  | ALA | 489 | 35.140 | 79.746 | 98.339  | 0.00 | 0.00 |
| ATOM | 7261 | CB  | ALA | 489 | 37.176 | 80.208 | 97.754  | 0.00 | 0.00 |
| ATOM | 7262 | HB1 | ALA | 489 | 37.219 | 80.985 | 98.518  | 0.00 | 0.00 |
| ATOM | 7263 | HB2 | ALA | 489 | 38.103 | 79.638 | 97.696  | 0.00 | 0.00 |
| ATOM | 7264 | HB3 | ALA | 489 | 36.904 | 80.562 | 96.759  | 0.00 | 0.00 |
| ATOM | 7265 | C   | ALA | 489 | 35.922 | 77.998 | 97.334  | 0.00 | 0.00 |
| ATOM | 7266 | O   | ALA | 489 | 35.034 | 77.922 | 96.431  | 0.00 | 0.00 |
| ATOM | 7267 | N   | CYS | 490 | 36.678 | 76.958 | 97.575  | 0.00 | 0.00 |
| ATOM | 7268 | H   | CYS | 490 | 37.134 | 77.012 | 98.475  | 0.00 | 0.00 |
| ATOM | 7269 | CA  | CYS | 490 | 36.616 | 75.682 | 96.842  | 0.00 | 0.00 |
| ATOM | 7270 | HA  | CYS | 490 | 36.711 | 75.961 | 95.793  | 0.00 | 0.00 |
| ATOM | 7271 | CB  | CYS | 490 | 37.768 | 74.789 | 97.368  | 0.00 | 0.00 |
| ATOM | 7272 | HB2 | CYS | 490 | 38.066 | 73.998 | 96.680  | 0.00 | 0.00 |
| ATOM | 7273 | HB3 | CYS | 490 | 38.684 | 75.370 | 97.475  | 0.00 | 0.00 |
| ATOM | 7274 | SG  | CYS | 490 | 37.390 | 74.022 | 98.977  | 0.00 | 0.00 |
| ATOM | 7275 | HG  | CYS | 490 | 36.779 | 75.130 | 99.406  | 0.00 | 0.00 |
| ATOM | 7276 | C   | CYS | 490 | 35.285 | 74.846 | 96.998  | 0.00 | 0.00 |
| ATOM | 7277 | O   | CYS | 490 | 35.207 | 73.702 | 96.573  | 0.00 | 0.00 |
| ATOM | 7278 | N   | ALA | 491 | 34.221 | 75.446 | 97.579  | 0.00 | 0.00 |
| ATOM | 7279 | H   | ALA | 491 | 34.351 | 76.363 | 97.981  | 0.00 | 0.00 |

|      |      |     |     |     |        |        |        |      |      |
|------|------|-----|-----|-----|--------|--------|--------|------|------|
| ATOM | 7280 | CA  | ALA | 491 | 32.876 | 74.859 | 97.422 | 0.00 | 0.00 |
| ATOM | 7281 | HA  | ALA | 491 | 32.949 | 73.804 | 97.157 | 0.00 | 0.00 |
| ATOM | 7282 | CB  | ALA | 491 | 32.208 | 74.891 | 98.842 | 0.00 | 0.00 |
| ATOM | 7283 | HB1 | ALA | 491 | 32.293 | 75.909 | 99.223 | 0.00 | 0.00 |
| ATOM | 7284 | HB2 | ALA | 491 | 31.144 | 74.709 | 98.687 | 0.00 | 0.00 |
| ATOM | 7285 | HB3 | ALA | 491 | 32.577 | 74.172 | 99.574 | 0.00 | 0.00 |
| ATOM | 7286 | C   | ALA | 491 | 32.031 | 75.528 | 96.291 | 0.00 | 0.00 |
| ATOM | 7287 | O   | ALA | 491 | 30.854 | 75.094 | 96.110 | 0.00 | 0.00 |
| ATOM | 7288 | N   | HIE | 492 | 32.475 | 76.529 | 95.591 | 0.00 | 0.00 |
| ATOM | 7289 | H   | HIE | 492 | 33.471 | 76.696 | 95.608 | 0.00 | 0.00 |
| ATOM | 7290 | CA  | HIE | 492 | 31.598 | 77.358 | 94.691 | 0.00 | 0.00 |
| ATOM | 7291 | HA  | HIE | 492 | 30.603 | 77.266 | 95.125 | 0.00 | 0.00 |
| ATOM | 7292 | CB  | HIE | 492 | 31.918 | 78.862 | 94.877 | 0.00 | 0.00 |
| ATOM | 7293 | HB2 | HIE | 492 | 32.993 | 78.881 | 94.698 | 0.00 | 0.00 |
| ATOM | 7294 | HB3 | HIE | 492 | 31.394 | 79.377 | 94.073 | 0.00 | 0.00 |
| ATOM | 7295 | CG  | HIE | 492 | 31.651 | 79.550 | 96.226 | 0.00 | 0.00 |
| ATOM | 7296 | ND1 | HIE | 492 | 30.746 | 80.653 | 96.406 | 0.00 | 0.00 |
| ATOM | 7297 | CE1 | HIE | 492 | 30.718 | 80.823 | 97.745 | 0.00 | 0.00 |
| ATOM | 7298 | HE1 | HIE | 492 | 30.065 | 81.503 | 98.273 | 0.00 | 0.00 |
| ATOM | 7299 | NE2 | HIE | 492 | 31.695 | 80.103 | 98.327 | 0.00 | 0.00 |
| ATOM | 7300 | HE2 | HIE | 492 | 31.920 | 80.260 | 99.300 | 0.00 | 0.00 |
| ATOM | 7301 | CD2 | HIE | 492 | 32.283 | 79.264 | 97.399 | 0.00 | 0.00 |
| ATOM | 7302 | HD2 | HIE | 492 | 33.109 | 78.583 | 97.538 | 0.00 | 0.00 |
| ATOM | 7303 | C   | HIE | 492 | 31.561 | 76.902 | 93.216 | 0.00 | 0.00 |
| ATOM | 7304 | O   | HIE | 492 | 32.606 | 76.550 | 92.687 | 0.00 | 0.00 |
| ATOM | 7305 | N   | PRO | 493 | 30.415 | 76.977 | 92.522 | 0.00 | 0.00 |

|      |      |      |     |     |        |        |        |      |      |
|------|------|------|-----|-----|--------|--------|--------|------|------|
| ATOM | 7306 | CD   | PRO | 493 | 29.151 | 77.510 | 93.017 | 0.00 | 0.00 |
| ATOM | 7307 | HD2  | PRO | 493 | 28.822 | 76.829 | 93.802 | 0.00 | 0.00 |
| ATOM | 7308 | HD3  | PRO | 493 | 29.308 | 78.506 | 93.432 | 0.00 | 0.00 |
| ATOM | 7309 | CG   | PRO | 493 | 28.228 | 77.421 | 91.807 | 0.00 | 0.00 |
| ATOM | 7310 | HG2  | PRO | 493 | 27.272 | 77.004 | 92.126 | 0.00 | 0.00 |
| ATOM | 7311 | HG3  | PRO | 493 | 28.025 | 78.480 | 91.651 | 0.00 | 0.00 |
| ATOM | 7312 | CB   | PRO | 493 | 28.783 | 76.497 | 90.769 | 0.00 | 0.00 |
| ATOM | 7313 | HB2  | PRO | 493 | 28.245 | 75.568 | 90.959 | 0.00 | 0.00 |
| ATOM | 7314 | HB3  | PRO | 493 | 28.551 | 76.894 | 89.780 | 0.00 | 0.00 |
| ATOM | 7315 | CA   | PRO | 493 | 30.261 | 76.364 | 91.190 | 0.00 | 0.00 |
| ATOM | 7316 | HA   | PRO | 493 | 30.513 | 75.313 | 91.333 | 0.00 | 0.00 |
| ATOM | 7317 | C    | PRO | 493 | 31.183 | 76.972 | 90.173 | 0.00 | 0.00 |
| ATOM | 7318 | O    | PRO | 493 | 31.528 | 76.345 | 89.215 | 0.00 | 0.00 |
| ATOM | 7319 | N    | ASN | 494 | 31.372 | 78.305 | 90.247 | 0.00 | 0.00 |
| ATOM | 7320 | H    | ASN | 494 | 30.925 | 78.828 | 90.987 | 0.00 | 0.00 |
| ATOM | 7321 | CA   | ASN | 494 | 32.120 | 79.062 | 89.268 | 0.00 | 0.00 |
| ATOM | 7322 | HA   | ASN | 494 | 31.849 | 78.785 | 88.249 | 0.00 | 0.00 |
| ATOM | 7323 | CB   | ASN | 494 | 31.870 | 80.598 | 89.421 | 0.00 | 0.00 |
| ATOM | 7324 | HB2  | ASN | 494 | 32.541 | 81.083 | 88.712 | 0.00 | 0.00 |
| ATOM | 7325 | HB3  | ASN | 494 | 30.947 | 80.853 | 88.899 | 0.00 | 0.00 |
| ATOM | 7326 | CG   | ASN | 494 | 32.016 | 81.240 | 90.769 | 0.00 | 0.00 |
| ATOM | 7327 | OD1  | ASN | 494 | 31.387 | 80.804 | 91.739 | 0.00 | 0.00 |
| ATOM | 7328 | ND2  | ASN | 494 | 32.696 | 82.413 | 90.953 | 0.00 | 0.00 |
| ATOM | 7329 | 1HD2 | ASN | 494 | 32.803 | 82.775 | 91.889 | 0.00 | 0.00 |
| ATOM | 7330 | 2HD2 | ASN | 494 | 33.241 | 82.836 | 90.215 | 0.00 | 0.00 |
| ATOM | 7331 | C    | ASN | 494 | 33.659 | 78.850 | 89.427 | 0.00 | 0.00 |

|      |      |      |     |     |        |        |        |      |      |
|------|------|------|-----|-----|--------|--------|--------|------|------|
| ATOM | 7332 | O    | ASN | 494 | 34.410 | 79.143 | 88.498 | 0.00 | 0.00 |
| ATOM | 7333 | N    | ILE | 495 | 34.129 | 78.421 | 90.622 | 0.00 | 0.00 |
| ATOM | 7334 | H    | ILE | 495 | 33.540 | 78.235 | 91.421 | 0.00 | 0.00 |
| ATOM | 7335 | CA   | ILE | 495 | 35.592 | 78.349 | 90.958 | 0.00 | 0.00 |
| ATOM | 7336 | HA   | ILE | 495 | 36.193 | 79.029 | 90.355 | 0.00 | 0.00 |
| ATOM | 7337 | CB   | ILE | 495 | 35.708 | 78.672 | 92.475 | 0.00 | 0.00 |
| ATOM | 7338 | HB   | ILE | 495 | 34.944 | 78.071 | 92.969 | 0.00 | 0.00 |
| ATOM | 7339 | CG2  | ILE | 495 | 37.065 | 78.338 | 93.123 | 0.00 | 0.00 |
| ATOM | 7340 | 1HG2 | ILE | 495 | 36.858 | 78.356 | 94.193 | 0.00 | 0.00 |
| ATOM | 7341 | 2HG2 | ILE | 495 | 37.498 | 77.387 | 92.809 | 0.00 | 0.00 |
| ATOM | 7342 | 3HG2 | ILE | 495 | 37.852 | 79.062 | 92.912 | 0.00 | 0.00 |
| ATOM | 7343 | CG1  | ILE | 495 | 35.416 | 80.145 | 92.658 | 0.00 | 0.00 |
| ATOM | 7344 | 2HG1 | ILE | 495 | 36.126 | 80.676 | 92.024 | 0.00 | 0.00 |
| ATOM | 7345 | 3HG1 | ILE | 495 | 34.414 | 80.380 | 92.300 | 0.00 | 0.00 |
| ATOM | 7346 | CD1  | ILE | 495 | 35.617 | 80.658 | 94.119 | 0.00 | 0.00 |
| ATOM | 7347 | 1HD1 | ILE | 495 | 35.520 | 81.741 | 94.197 | 0.00 | 0.00 |
| ATOM | 7348 | 2HD1 | ILE | 495 | 34.975 | 80.140 | 94.831 | 0.00 | 0.00 |
| ATOM | 7349 | 3HD1 | ILE | 495 | 36.649 | 80.505 | 94.433 | 0.00 | 0.00 |
| ATOM | 7350 | C    | ILE | 495 | 36.109 | 76.868 | 90.575 | 0.00 | 0.00 |
| ATOM | 7351 | O    | ILE | 495 | 35.617 | 75.811 | 91.008 | 0.00 | 0.00 |
| ATOM | 7352 | N    | LEU | 496 | 37.323 | 76.974 | 89.931 | 0.00 | 0.00 |
| ATOM | 7353 | H    | LEU | 496 | 37.701 | 77.838 | 89.571 | 0.00 | 0.00 |
| ATOM | 7354 | CA   | LEU | 496 | 38.067 | 75.748 | 89.612 | 0.00 | 0.00 |
| ATOM | 7355 | HA   | LEU | 496 | 37.454 | 74.867 | 89.801 | 0.00 | 0.00 |
| ATOM | 7356 | CB   | LEU | 496 | 38.401 | 75.747 | 88.090 | 0.00 | 0.00 |
| ATOM | 7357 | HB2  | LEU | 496 | 39.024 | 76.629 | 87.940 | 0.00 | 0.00 |

|      |      |      |     |     |        |        |        |      |      |
|------|------|------|-----|-----|--------|--------|--------|------|------|
| ATOM | 7358 | HB3  | LEU | 496 | 39.038 | 74.868 | 87.992 | 0.00 | 0.00 |
| ATOM | 7359 | CG   | LEU | 496 | 37.234 | 75.468 | 87.160 | 0.00 | 0.00 |
| ATOM | 7360 | HG   | LEU | 496 | 37.586 | 75.204 | 86.163 | 0.00 | 0.00 |
| ATOM | 7361 | CD1  | LEU | 496 | 36.162 | 74.387 | 87.557 | 0.00 | 0.00 |
| ATOM | 7362 | 1HD1 | LEU | 496 | 36.717 | 73.491 | 87.835 | 0.00 | 0.00 |
| ATOM | 7363 | 2HD1 | LEU | 496 | 35.646 | 74.696 | 88.466 | 0.00 | 0.00 |
| ATOM | 7364 | 3HD1 | LEU | 496 | 35.433 | 74.171 | 86.776 | 0.00 | 0.00 |
| ATOM | 7365 | CD2  | LEU | 496 | 36.471 | 76.715 | 86.792 | 0.00 | 0.00 |
| ATOM | 7366 | 1HD2 | LEU | 496 | 35.858 | 76.507 | 85.915 | 0.00 | 0.00 |
| ATOM | 7367 | 2HD2 | LEU | 496 | 35.835 | 77.023 | 87.622 | 0.00 | 0.00 |
| ATOM | 7368 | 3HD2 | LEU | 496 | 37.167 | 77.508 | 86.519 | 0.00 | 0.00 |
| ATOM | 7369 | C    | LEU | 496 | 39.284 | 75.697 | 90.531 | 0.00 | 0.00 |
| ATOM | 7370 | O    | LEU | 496 | 40.250 | 76.395 | 90.211 | 0.00 | 0.00 |
| ATOM | 7371 | N    | PRO | 497 | 39.309 | 74.999 | 91.708 | 0.00 | 0.00 |
| ATOM | 7372 | CD   | PRO | 497 | 38.115 | 74.497 | 92.315 | 0.00 | 0.00 |
| ATOM | 7373 | HD2  | PRO | 497 | 37.389 | 75.279 | 92.535 | 0.00 | 0.00 |
| ATOM | 7374 | HD3  | PRO | 497 | 37.696 | 73.731 | 91.663 | 0.00 | 0.00 |
| ATOM | 7375 | CG   | PRO | 497 | 38.502 | 73.923 | 93.721 | 0.00 | 0.00 |
| ATOM | 7376 | HG2  | PRO | 497 | 37.598 | 73.899 | 94.330 | 0.00 | 0.00 |
| ATOM | 7377 | HG3  | PRO | 497 | 38.932 | 72.930 | 93.590 | 0.00 | 0.00 |
| ATOM | 7378 | CB   | PRO | 497 | 39.612 | 74.848 | 94.150 | 0.00 | 0.00 |
| ATOM | 7379 | HB2  | PRO | 497 | 39.333 | 75.881 | 94.360 | 0.00 | 0.00 |
| ATOM | 7380 | HB3  | PRO | 497 | 40.184 | 74.374 | 94.947 | 0.00 | 0.00 |
| ATOM | 7381 | CA   | PRO | 497 | 40.382 | 74.943 | 92.748 | 0.00 | 0.00 |
| ATOM | 7382 | HA   | PRO | 497 | 40.838 | 75.922 | 92.602 | 0.00 | 0.00 |
| ATOM | 7383 | C    | PRO | 497 | 41.531 | 73.979 | 92.503 | 0.00 | 0.00 |

|      |      |     |     |     |        |        |        |      |      |
|------|------|-----|-----|-----|--------|--------|--------|------|------|
| ATOM | 7384 | O   | PRO | 497 | 41.301 | 72.749 | 92.402 | 0.00 | 0.00 |
| ATOM | 7385 | N   | SER | 498 | 42.778 | 74.491 | 92.393 | 0.00 | 0.00 |
| ATOM | 7386 | H   | SER | 498 | 42.949 | 75.486 | 92.416 | 0.00 | 0.00 |
| ATOM | 7387 | CA  | SER | 498 | 44.015 | 73.691 | 92.235 | 0.00 | 0.00 |
| ATOM | 7388 | HA  | SER | 498 | 43.820 | 72.625 | 92.350 | 0.00 | 0.00 |
| ATOM | 7389 | CB  | SER | 498 | 44.621 | 73.927 | 90.821 | 0.00 | 0.00 |
| ATOM | 7390 | HB2 | SER | 498 | 45.430 | 73.258 | 90.527 | 0.00 | 0.00 |
| ATOM | 7391 | HB3 | SER | 498 | 43.794 | 73.845 | 90.115 | 0.00 | 0.00 |
| ATOM | 7392 | OG  | SER | 498 | 45.044 | 75.229 | 90.655 | 0.00 | 0.00 |
| ATOM | 7393 | HG  | SER | 498 | 44.286 | 75.707 | 90.311 | 0.00 | 0.00 |
| ATOM | 7394 | C   | SER | 498 | 45.049 | 73.966 | 93.275 | 0.00 | 0.00 |
| ATOM | 7395 | O   | SER | 498 | 44.950 | 74.904 | 94.080 | 0.00 | 0.00 |
| ATOM | 7396 | N   | SER | 499 | 46.091 | 73.127 | 93.322 | 0.00 | 0.00 |
| ATOM | 7397 | H   | SER | 499 | 46.201 | 72.414 | 92.616 | 0.00 | 0.00 |
| ATOM | 7398 | CA  | SER | 499 | 47.159 | 73.089 | 94.376 | 0.00 | 0.00 |
| ATOM | 7399 | HA  | SER | 499 | 46.867 | 73.673 | 95.249 | 0.00 | 0.00 |
| ATOM | 7400 | CB  | SER | 499 | 47.343 | 71.633 | 94.725 | 0.00 | 0.00 |
| ATOM | 7401 | HB2 | SER | 499 | 48.114 | 71.601 | 95.495 | 0.00 | 0.00 |
| ATOM | 7402 | HB3 | SER | 499 | 46.483 | 71.206 | 95.241 | 0.00 | 0.00 |
| ATOM | 7403 | OG  | SER | 499 | 47.692 | 70.990 | 93.539 | 0.00 | 0.00 |
| ATOM | 7404 | HG  | SER | 499 | 48.576 | 71.130 | 93.191 | 0.00 | 0.00 |
| ATOM | 7405 | C   | SER | 499 | 48.474 | 73.671 | 93.904 | 0.00 | 0.00 |
| ATOM | 7406 | O   | SER | 499 | 48.775 | 73.896 | 92.674 | 0.00 | 0.00 |
| ATOM | 7407 | N   | THR | 500 | 49.373 | 73.883 | 94.857 | 0.00 | 0.00 |
| ATOM | 7408 | H   | THR | 500 | 49.073 | 73.584 | 95.774 | 0.00 | 0.00 |
| ATOM | 7409 | CA  | THR | 500 | 50.779 | 74.097 | 94.552 | 0.00 | 0.00 |



|      |      |      |     |     |        |        |        |      |      |
|------|------|------|-----|-----|--------|--------|--------|------|------|
| ATOM | 7410 | HA   | THR | 500 | 50.815 | 74.618 | 93.595 | 0.00 | 0.00 |
| ATOM | 7411 | CB   | THR | 500 | 51.516 | 74.866 | 95.703 | 0.00 | 0.00 |
| ATOM | 7412 | HB   | THR | 500 | 52.195 | 74.183 | 96.214 | 0.00 | 0.00 |
| ATOM | 7413 | CG2  | THR | 500 | 52.260 | 76.087 | 95.229 | 0.00 | 0.00 |
| ATOM | 7414 | 1HG2 | THR | 500 | 52.853 | 76.557 | 96.014 | 0.00 | 0.00 |
| ATOM | 7415 | 2HG2 | THR | 500 | 53.001 | 75.733 | 94.511 | 0.00 | 0.00 |
| ATOM | 7416 | 3HG2 | THR | 500 | 51.583 | 76.851 | 94.849 | 0.00 | 0.00 |
| ATOM | 7417 | OG1  | THR | 500 | 50.594 | 75.271 | 96.770 | 0.00 | 0.00 |
| ATOM | 7418 | HG1  | THR | 500 | 50.121 | 74.505 | 97.104 | 0.00 | 0.00 |
| ATOM | 7419 | C    | THR | 500 | 51.431 | 72.752 | 94.391 | 0.00 | 0.00 |
| ATOM | 7420 | O    | THR | 500 | 50.778 | 71.705 | 94.414 | 0.00 | 0.00 |
| ATOM | 7421 | N    | ASN | 501 | 52.726 | 72.704 | 94.040 | 0.00 | 0.00 |
| ATOM | 7422 | H    | ASN | 501 | 53.255 | 73.548 | 93.872 | 0.00 | 0.00 |
| ATOM | 7423 | CA   | ASN | 501 | 53.577 | 71.538 | 93.908 | 0.00 | 0.00 |
| ATOM | 7424 | HA   | ASN | 501 | 52.946 | 70.675 | 93.697 | 0.00 | 0.00 |
| ATOM | 7425 | CB   | ASN | 501 | 54.378 | 71.733 | 92.582 | 0.00 | 0.00 |
| ATOM | 7426 | HB2  | ASN | 501 | 53.593 | 71.508 | 91.860 | 0.00 | 0.00 |
| ATOM | 7427 | HB3  | ASN | 501 | 54.810 | 72.732 | 92.531 | 0.00 | 0.00 |
| ATOM | 7428 | CG   | ASN | 501 | 55.534 | 70.746 | 92.384 | 0.00 | 0.00 |
| ATOM | 7429 | OD1  | ASN | 501 | 56.551 | 70.891 | 93.043 | 0.00 | 0.00 |
| ATOM | 7430 | ND2  | ASN | 501 | 55.384 | 69.597 | 91.750 | 0.00 | 0.00 |
| ATOM | 7431 | 1HD2 | ASN | 501 | 56.114 | 68.899 | 91.771 | 0.00 | 0.00 |
| ATOM | 7432 | 2HD2 | ASN | 501 | 54.512 | 69.363 | 91.298 | 0.00 | 0.00 |
| ATOM | 7433 | C    | ASN | 501 | 54.451 | 71.232 | 95.116 | 0.00 | 0.00 |
| ATOM | 7434 | O    | ASN | 501 | 54.490 | 70.070 | 95.513 | 0.00 | 0.00 |
| ATOM | 7435 | N    | PRO | 502 | 55.228 | 72.193 | 95.673 | 0.00 | 0.00 |

|      |      |      |     |     |        |        |         |      |      |
|------|------|------|-----|-----|--------|--------|---------|------|------|
| ATOM | 7436 | CD   | PRO | 502 | 55.436 | 73.579 | 95.207  | 0.00 | 0.00 |
| ATOM | 7437 | HD2  | PRO | 502 | 55.792 | 73.624 | 94.177  | 0.00 | 0.00 |
| ATOM | 7438 | HD3  | PRO | 502 | 54.578 | 74.237 | 95.340  | 0.00 | 0.00 |
| ATOM | 7439 | CG   | PRO | 502 | 56.561 | 74.150 | 96.061  | 0.00 | 0.00 |
| ATOM | 7440 | HG2  | PRO | 502 | 57.481 | 74.253 | 95.486  | 0.00 | 0.00 |
| ATOM | 7441 | HG3  | PRO | 502 | 56.283 | 75.179 | 96.291  | 0.00 | 0.00 |
| ATOM | 7442 | CB   | PRO | 502 | 56.691 | 73.272 | 97.292  | 0.00 | 0.00 |
| ATOM | 7443 | HB2  | PRO | 502 | 57.745 | 73.112 | 97.522  | 0.00 | 0.00 |
| ATOM | 7444 | HB3  | PRO | 502 | 56.144 | 73.704 | 98.130  | 0.00 | 0.00 |
| ATOM | 7445 | CA   | PRO | 502 | 56.003 | 71.947 | 96.900  | 0.00 | 0.00 |
| ATOM | 7446 | HA   | PRO | 502 | 56.772 | 71.250 | 96.566  | 0.00 | 0.00 |
| ATOM | 7447 | C    | PRO | 502 | 55.101 | 71.479 | 98.103  | 0.00 | 0.00 |
| ATOM | 7448 | O    | PRO | 502 | 55.550 | 70.708 | 98.964  | 0.00 | 0.00 |
| ATOM | 7449 | N    | THR | 503 | 53.771 | 71.760 | 98.052  | 0.00 | 0.00 |
| ATOM | 7450 | H    | THR | 503 | 53.278 | 72.209 | 97.294  | 0.00 | 0.00 |
| ATOM | 7451 | CA   | THR | 503 | 52.839 | 71.223 | 99.038  | 0.00 | 0.00 |
| ATOM | 7452 | HA   | THR | 503 | 53.234 | 71.454 | 100.027 | 0.00 | 0.00 |
| ATOM | 7453 | CB   | THR | 503 | 51.507 | 71.966 | 98.879  | 0.00 | 0.00 |
| ATOM | 7454 | HB   | THR | 503 | 50.737 | 71.272 | 99.217  | 0.00 | 0.00 |
| ATOM | 7455 | CG2  | THR | 503 | 51.312 | 73.359 | 99.548  | 0.00 | 0.00 |
| ATOM | 7456 | 1HG2 | THR | 503 | 50.253 | 73.615 | 99.587  | 0.00 | 0.00 |
| ATOM | 7457 | 2HG2 | THR | 503 | 51.508 | 73.208 | 100.610 | 0.00 | 0.00 |
| ATOM | 7458 | 3HG2 | THR | 503 | 52.077 | 74.060 | 99.213  | 0.00 | 0.00 |
| ATOM | 7459 | OG1  | THR | 503 | 51.173 | 72.102 | 97.483  | 0.00 | 0.00 |
| ATOM | 7460 | HG1  | THR | 503 | 50.224 | 72.246 | 97.480  | 0.00 | 0.00 |
| ATOM | 7461 | C    | THR | 503 | 52.590 | 69.696 | 98.962  | 0.00 | 0.00 |

|      |      |      |     |     |        |        |        |      |      |
|------|------|------|-----|-----|--------|--------|--------|------|------|
| ATOM | 7462 | O    | THR | 503 | 52.104 | 69.196 | 99.992 | 0.00 | 0.00 |
| ATOM | 7463 | N    | LEU | 504 | 53.074 | 68.935 | 97.943 | 0.00 | 0.00 |
| ATOM | 7464 | H    | LEU | 504 | 53.574 | 69.401 | 97.200 | 0.00 | 0.00 |
| ATOM | 7465 | CA   | LEU | 504 | 52.642 | 67.499 | 97.709 | 0.00 | 0.00 |
| ATOM | 7466 | HA   | LEU | 504 | 51.902 | 67.232 | 98.464 | 0.00 | 0.00 |
| ATOM | 7467 | CB   | LEU | 504 | 51.934 | 67.430 | 96.342 | 0.00 | 0.00 |
| ATOM | 7468 | HB2  | LEU | 504 | 52.656 | 67.821 | 95.625 | 0.00 | 0.00 |
| ATOM | 7469 | HB3  | LEU | 504 | 51.728 | 66.411 | 96.017 | 0.00 | 0.00 |
| ATOM | 7470 | CG   | LEU | 504 | 50.618 | 68.222 | 96.188 | 0.00 | 0.00 |
| ATOM | 7471 | HG   | LEU | 504 | 50.833 | 69.287 | 96.275 | 0.00 | 0.00 |
| ATOM | 7472 | CD1  | LEU | 504 | 50.157 | 67.965 | 94.759 | 0.00 | 0.00 |
| ATOM | 7473 | 1HD1 | LEU | 504 | 49.864 | 66.915 | 94.723 | 0.00 | 0.00 |
| ATOM | 7474 | 2HD1 | LEU | 504 | 49.199 | 68.353 | 94.413 | 0.00 | 0.00 |
| ATOM | 7475 | 3HD1 | LEU | 504 | 50.960 | 68.185 | 94.057 | 0.00 | 0.00 |
| ATOM | 7476 | CD2  | LEU | 504 | 49.416 | 67.836 | 97.077 | 0.00 | 0.00 |
| ATOM | 7477 | 1HD2 | LEU | 504 | 49.446 | 68.504 | 97.938 | 0.00 | 0.00 |
| ATOM | 7478 | 2HD2 | LEU | 504 | 48.402 | 68.031 | 96.730 | 0.00 | 0.00 |
| ATOM | 7479 | 3HD2 | LEU | 504 | 49.493 | 66.821 | 97.468 | 0.00 | 0.00 |
| ATOM | 7480 | C    | LEU | 504 | 53.890 | 66.621 | 97.724 | 0.00 | 0.00 |
| ATOM | 7481 | O    | LEU | 504 | 54.774 | 66.816 | 96.963 | 0.00 | 0.00 |
| ATOM | 7482 | N    | PRO | 505 | 53.885 | 65.470 | 98.450 | 0.00 | 0.00 |
| ATOM | 7483 | CD   | PRO | 505 | 54.643 | 64.283 | 98.015 | 0.00 | 0.00 |
| ATOM | 7484 | HD2  | PRO | 505 | 54.785 | 64.240 | 96.936 | 0.00 | 0.00 |
| ATOM | 7485 | HD3  | PRO | 505 | 55.666 | 64.202 | 98.384 | 0.00 | 0.00 |
| ATOM | 7486 | CG   | PRO | 505 | 53.804 | 63.149 | 98.519 | 0.00 | 0.00 |
| ATOM | 7487 | HG2  | PRO | 505 | 53.042 | 62.972 | 97.761 | 0.00 | 0.00 |

|      |      |     |     |     |        |        |         |      |      |
|------|------|-----|-----|-----|--------|--------|---------|------|------|
| ATOM | 7488 | HG3 | PRO | 505 | 54.366 | 62.298 | 98.902  | 0.00 | 0.00 |
| ATOM | 7489 | CB  | PRO | 505 | 53.066 | 63.705 | 99.748  | 0.00 | 0.00 |
| ATOM | 7490 | HB2 | PRO | 505 | 52.072 | 63.267 | 99.840  | 0.00 | 0.00 |
| ATOM | 7491 | HB3 | PRO | 505 | 53.723 | 63.366 | 100.550 | 0.00 | 0.00 |
| ATOM | 7492 | CA  | PRO | 505 | 53.049 | 65.217 | 99.641  | 0.00 | 0.00 |
| ATOM | 7493 | HA  | PRO | 505 | 52.049 | 65.636 | 99.523  | 0.00 | 0.00 |
| ATOM | 7494 | C   | PRO | 505 | 53.527 | 65.912 | 100.895 | 0.00 | 0.00 |
| ATOM | 7495 | O   | PRO | 505 | 54.291 | 66.856 | 100.853 | 0.00 | 0.00 |
| ATOM | 7496 | N   | TYR | 506 | 52.907 | 65.575 | 102.017 | 0.00 | 0.00 |
| ATOM | 7497 | H   | TYR | 506 | 52.102 | 64.970 | 101.944 | 0.00 | 0.00 |
| ATOM | 7498 | CA  | TYR | 506 | 53.152 | 66.174 | 103.306 | 0.00 | 0.00 |
| ATOM | 7499 | HA  | TYR | 506 | 53.387 | 67.238 | 103.293 | 0.00 | 0.00 |
| ATOM | 7500 | CB  | TYR | 506 | 51.797 | 66.081 | 104.080 | 0.00 | 0.00 |
| ATOM | 7501 | HB2 | TYR | 506 | 51.043 | 66.592 | 103.481 | 0.00 | 0.00 |
| ATOM | 7502 | HB3 | TYR | 506 | 51.567 | 65.016 | 104.044 | 0.00 | 0.00 |
| ATOM | 7503 | CG  | TYR | 506 | 51.787 | 66.608 | 105.506 | 0.00 | 0.00 |
| ATOM | 7504 | CD1 | TYR | 506 | 52.239 | 67.931 | 105.833 | 0.00 | 0.00 |
| ATOM | 7505 | HD1 | TYR | 506 | 52.660 | 68.552 | 105.056 | 0.00 | 0.00 |
| ATOM | 7506 | CE1 | TYR | 506 | 52.035 | 68.475 | 107.110 | 0.00 | 0.00 |
| ATOM | 7507 | HE1 | TYR | 506 | 52.490 | 69.428 | 107.337 | 0.00 | 0.00 |
| ATOM | 7508 | CZ  | TYR | 506 | 51.500 | 67.705 | 108.086 | 0.00 | 0.00 |
| ATOM | 7509 | OH  | TYR | 506 | 51.238 | 68.315 | 109.268 | 0.00 | 0.00 |
| ATOM | 7510 | HH  | TYR | 506 | 51.493 | 69.238 | 109.215 | 0.00 | 0.00 |
| ATOM | 7511 | CE2 | TYR | 506 | 51.136 | 66.380 | 107.779 | 0.00 | 0.00 |
| ATOM | 7512 | HE2 | TYR | 506 | 50.657 | 65.791 | 108.547 | 0.00 | 0.00 |
| ATOM | 7513 | CD2 | TYR | 506 | 51.265 | 65.826 | 106.506 | 0.00 | 0.00 |

|      |      |      |     |     |        |        |         |      |      |
|------|------|------|-----|-----|--------|--------|---------|------|------|
| ATOM | 7514 | HD2  | TYR | 506 | 50.855 | 64.858 | 106.261 | 0.00 | 0.00 |
| ATOM | 7515 | C    | TYR | 506 | 54.397 | 65.419 | 103.805 | 0.00 | 0.00 |
| ATOM | 7516 | O    | TYR | 506 | 54.384 | 64.330 | 104.325 | 0.00 | 0.00 |
| ATOM | 7517 | N    | THR | 507 | 55.642 | 66.011 | 103.677 | 0.00 | 0.00 |
| ATOM | 7518 | H    | THR | 507 | 55.765 | 66.876 | 103.170 | 0.00 | 0.00 |
| ATOM | 7519 | CA   | THR | 507 | 56.838 | 65.366 | 104.145 | 0.00 | 0.00 |
| ATOM | 7520 | HA   | THR | 507 | 56.614 | 64.382 | 104.557 | 0.00 | 0.00 |
| ATOM | 7521 | CB   | THR | 507 | 57.818 | 65.044 | 102.954 | 0.00 | 0.00 |
| ATOM | 7522 | HB   | THR | 507 | 58.497 | 64.324 | 103.410 | 0.00 | 0.00 |
| ATOM | 7523 | CG2  | THR | 507 | 57.070 | 64.270 | 101.883 | 0.00 | 0.00 |
| ATOM | 7524 | 1HG2 | THR | 507 | 57.763 | 63.988 | 101.090 | 0.00 | 0.00 |
| ATOM | 7525 | 2HG2 | THR | 507 | 56.663 | 63.435 | 102.454 | 0.00 | 0.00 |
| ATOM | 7526 | 3HG2 | THR | 507 | 56.226 | 64.876 | 101.555 | 0.00 | 0.00 |
| ATOM | 7527 | OG1  | THR | 507 | 58.604 | 66.115 | 102.597 | 0.00 | 0.00 |
| ATOM | 7528 | HG1  | THR | 507 | 59.105 | 65.704 | 101.888 | 0.00 | 0.00 |
| ATOM | 7529 | C    | THR | 507 | 57.549 | 66.118 | 105.293 | 0.00 | 0.00 |
| ATOM | 7530 | O    | THR | 507 | 57.351 | 67.333 | 105.473 | 0.00 | 0.00 |
| ATOM | 7531 | N    | LEU | 508 | 58.402 | 65.436 | 106.021 | 0.00 | 0.00 |
| ATOM | 7532 | H    | LEU | 508 | 58.579 | 64.487 | 105.723 | 0.00 | 0.00 |
| ATOM | 7533 | CA   | LEU | 508 | 59.246 | 66.038 | 107.054 | 0.00 | 0.00 |
| ATOM | 7534 | HA   | LEU | 508 | 58.557 | 66.715 | 107.559 | 0.00 | 0.00 |
| ATOM | 7535 | CB   | LEU | 508 | 59.794 | 64.940 | 108.018 | 0.00 | 0.00 |
| ATOM | 7536 | HB2  | LEU | 508 | 60.128 | 64.188 | 107.304 | 0.00 | 0.00 |
| ATOM | 7537 | HB3  | LEU | 508 | 60.619 | 65.391 | 108.569 | 0.00 | 0.00 |
| ATOM | 7538 | CG   | LEU | 508 | 58.822 | 64.416 | 109.092 | 0.00 | 0.00 |
| ATOM | 7539 | HG   | LEU | 508 | 59.384 | 63.944 | 109.898 | 0.00 | 0.00 |

|      |      |      |     |     |        |        |         |      |      |
|------|------|------|-----|-----|--------|--------|---------|------|------|
| ATOM | 7540 | CD1  | LEU | 508 | 58.116 | 65.465 | 109.861 | 0.00 | 0.00 |
| ATOM | 7541 | 1HD1 | LEU | 508 | 57.467 | 64.969 | 110.583 | 0.00 | 0.00 |
| ATOM | 7542 | 2HD1 | LEU | 508 | 58.800 | 66.081 | 110.445 | 0.00 | 0.00 |
| ATOM | 7543 | 3HD1 | LEU | 508 | 57.422 | 66.050 | 109.259 | 0.00 | 0.00 |
| ATOM | 7544 | CD2  | LEU | 508 | 57.903 | 63.403 | 108.444 | 0.00 | 0.00 |
| ATOM | 7545 | 1HD2 | LEU | 508 | 58.562 | 62.662 | 107.992 | 0.00 | 0.00 |
| ATOM | 7546 | 2HD2 | LEU | 508 | 57.273 | 62.881 | 109.164 | 0.00 | 0.00 |
| ATOM | 7547 | 3HD2 | LEU | 508 | 57.388 | 63.812 | 107.575 | 0.00 | 0.00 |
| ATOM | 7548 | C    | LEU | 508 | 60.281 | 67.012 | 106.517 | 0.00 | 0.00 |
| ATOM | 7549 | O    | LEU | 508 | 60.921 | 67.684 | 107.333 | 0.00 | 0.00 |
| ATOM | 7550 | N    | ASN | 509 | 60.361 | 67.210 | 105.177 | 0.00 | 0.00 |
| ATOM | 7551 | H    | ASN | 509 | 60.016 | 66.513 | 104.532 | 0.00 | 0.00 |
| ATOM | 7552 | CA   | ASN | 509 | 61.145 | 68.380 | 104.569 | 0.00 | 0.00 |
| ATOM | 7553 | HA   | ASN | 509 | 61.707 | 68.813 | 105.396 | 0.00 | 0.00 |
| ATOM | 7554 | CB   | ASN | 509 | 62.082 | 67.889 | 103.432 | 0.00 | 0.00 |
| ATOM | 7555 | HB2  | ASN | 509 | 61.580 | 67.397 | 102.598 | 0.00 | 0.00 |
| ATOM | 7556 | HB3  | ASN | 509 | 62.472 | 68.822 | 103.026 | 0.00 | 0.00 |
| ATOM | 7557 | CG   | ASN | 509 | 63.208 | 66.928 | 103.814 | 0.00 | 0.00 |
| ATOM | 7558 | OD1  | ASN | 509 | 63.832 | 67.034 | 104.819 | 0.00 | 0.00 |
| ATOM | 7559 | ND2  | ASN | 509 | 63.430 | 65.982 | 102.952 | 0.00 | 0.00 |
| ATOM | 7560 | 1HD2 | ASN | 509 | 64.202 | 65.368 | 103.169 | 0.00 | 0.00 |
| ATOM | 7561 | 2HD2 | ASN | 509 | 62.897 | 65.722 | 102.135 | 0.00 | 0.00 |
| ATOM | 7562 | C    | ASN | 509 | 60.143 | 69.426 | 103.954 | 0.00 | 0.00 |
| ATOM | 7563 | O    | ASN | 509 | 60.496 | 70.591 | 103.871 | 0.00 | 0.00 |
| ATOM | 7564 | N    | THR | 510 | 58.970 | 68.979 | 103.507 | 0.00 | 0.00 |
| ATOM | 7565 | H    | THR | 510 | 58.618 | 68.091 | 103.836 | 0.00 | 0.00 |

|      |      |      |     |     |        |        |         |      |      |
|------|------|------|-----|-----|--------|--------|---------|------|------|
| ATOM | 7566 | CA   | THR | 510 | 57.873 | 69.872 | 102.927 | 0.00 | 0.00 |
| ATOM | 7567 | HA   | THR | 510 | 58.193 | 70.317 | 101.985 | 0.00 | 0.00 |
| ATOM | 7568 | CB   | THR | 510 | 56.540 | 69.118 | 102.636 | 0.00 | 0.00 |
| ATOM | 7569 | HB   | THR | 510 | 56.361 | 68.502 | 103.517 | 0.00 | 0.00 |
| ATOM | 7570 | CG2  | THR | 510 | 55.366 | 69.950 | 102.235 | 0.00 | 0.00 |
| ATOM | 7571 | 1HG2 | THR | 510 | 54.501 | 69.380 | 101.897 | 0.00 | 0.00 |
| ATOM | 7572 | 2HG2 | THR | 510 | 54.930 | 70.569 | 103.020 | 0.00 | 0.00 |
| ATOM | 7573 | 3HG2 | THR | 510 | 55.624 | 70.617 | 101.413 | 0.00 | 0.00 |
| ATOM | 7574 | OG1  | THR | 510 | 56.674 | 68.206 | 101.612 | 0.00 | 0.00 |
| ATOM | 7575 | HG1  | THR | 510 | 55.805 | 68.078 | 101.226 | 0.00 | 0.00 |
| ATOM | 7576 | C    | THR | 510 | 57.546 | 71.028 | 103.951 | 0.00 | 0.00 |
| ATOM | 7577 | O    | THR | 510 | 57.578 | 72.177 | 103.543 | 0.00 | 0.00 |
| ATOM | 7578 | N    | ILE | 511 | 57.374 | 70.741 | 105.196 | 0.00 | 0.00 |
| ATOM | 7579 | H    | ILE | 511 | 57.389 | 69.770 | 105.472 | 0.00 | 0.00 |
| ATOM | 7580 | CA   | ILE | 511 | 57.002 | 71.748 | 106.156 | 0.00 | 0.00 |
| ATOM | 7581 | HA   | ILE | 511 | 56.247 | 72.320 | 105.617 | 0.00 | 0.00 |
| ATOM | 7582 | CB   | ILE | 511 | 56.364 | 71.088 | 107.409 | 0.00 | 0.00 |
| ATOM | 7583 | HB   | ILE | 511 | 56.021 | 71.874 | 108.082 | 0.00 | 0.00 |
| ATOM | 7584 | CG2  | ILE | 511 | 55.035 | 70.313 | 107.104 | 0.00 | 0.00 |
| ATOM | 7585 | 1HG2 | ILE | 511 | 54.368 | 70.132 | 107.947 | 0.00 | 0.00 |
| ATOM | 7586 | 2HG2 | ILE | 511 | 54.356 | 70.917 | 106.503 | 0.00 | 0.00 |
| ATOM | 7587 | 3HG2 | ILE | 511 | 55.302 | 69.395 | 106.581 | 0.00 | 0.00 |
| ATOM | 7588 | CG1  | ILE | 511 | 57.269 | 70.129 | 108.093 | 0.00 | 0.00 |
| ATOM | 7589 | 2HG1 | ILE | 511 | 57.454 | 69.370 | 107.333 | 0.00 | 0.00 |
| ATOM | 7590 | 3HG1 | ILE | 511 | 58.203 | 70.632 | 108.343 | 0.00 | 0.00 |
| ATOM | 7591 | CD1  | ILE | 511 | 56.665 | 69.379 | 109.327 | 0.00 | 0.00 |

|      |      |      |     |     |        |        |         |      |      |
|------|------|------|-----|-----|--------|--------|---------|------|------|
| ATOM | 7592 | 1HD1 | ILE | 511 | 55.717 | 68.910 | 109.063 | 0.00 | 0.00 |
| ATOM | 7593 | 2HD1 | ILE | 511 | 57.396 | 68.581 | 109.456 | 0.00 | 0.00 |
| ATOM | 7594 | 3HD1 | ILE | 511 | 56.479 | 70.017 | 110.191 | 0.00 | 0.00 |
| ATOM | 7595 | C    | ILE | 511 | 58.122 | 72.694 | 106.474 | 0.00 | 0.00 |
| ATOM | 7596 | O    | ILE | 511 | 57.773 | 73.818 | 106.868 | 0.00 | 0.00 |
| ATOM | 7597 | N    | ASP | 512 | 59.395 | 72.426 | 106.117 | 0.00 | 0.00 |
| ATOM | 7598 | H    | ASP | 512 | 59.660 | 71.720 | 105.445 | 0.00 | 0.00 |
| ATOM | 7599 | CA   | ASP | 512 | 60.493 | 73.438 | 106.449 | 0.00 | 0.00 |
| ATOM | 7600 | HA   | ASP | 512 | 60.101 | 74.112 | 107.210 | 0.00 | 0.00 |
| ATOM | 7601 | CB   | ASP | 512 | 61.748 | 72.800 | 107.177 | 0.00 | 0.00 |
| ATOM | 7602 | HB2  | ASP | 512 | 62.017 | 72.015 | 106.471 | 0.00 | 0.00 |
| ATOM | 7603 | HB3  | ASP | 512 | 62.556 | 73.532 | 107.157 | 0.00 | 0.00 |
| ATOM | 7604 | CG   | ASP | 512 | 61.394 | 72.400 | 108.557 | 0.00 | 0.00 |
| ATOM | 7605 | OD1  | ASP | 512 | 61.555 | 71.174 | 108.893 | 0.00 | 0.00 |
| ATOM | 7606 | OD2  | ASP | 512 | 61.111 | 73.280 | 109.378 | 0.00 | 0.00 |
| ATOM | 7607 | C    | ASP | 512 | 60.808 | 74.206 | 105.158 | 0.00 | 0.00 |
| ATOM | 7608 | O    | ASP | 512 | 60.939 | 75.385 | 105.283 | 0.00 | 0.00 |
| ATOM | 7609 | N    | GLU | 513 | 60.852 | 73.608 | 103.940 | 0.00 | 0.00 |
| ATOM | 7610 | H    | GLU | 513 | 60.545 | 72.658 | 103.787 | 0.00 | 0.00 |
| ATOM | 7611 | CA   | GLU | 513 | 61.330 | 74.346 | 102.725 | 0.00 | 0.00 |
| ATOM | 7612 | HA   | GLU | 513 | 62.301 | 74.773 | 102.975 | 0.00 | 0.00 |
| ATOM | 7613 | CB   | GLU | 513 | 61.696 | 73.413 | 101.573 | 0.00 | 0.00 |
| ATOM | 7614 | HB2  | GLU | 513 | 62.281 | 73.972 | 100.842 | 0.00 | 0.00 |
| ATOM | 7615 | HB3  | GLU | 513 | 62.299 | 72.614 | 102.005 | 0.00 | 0.00 |
| ATOM | 7616 | CG   | GLU | 513 | 60.496 | 72.825 | 100.870 | 0.00 | 0.00 |
| ATOM | 7617 | HG2  | GLU | 513 | 59.785 | 72.323 | 101.527 | 0.00 | 0.00 |



|      |      |     |     |     |        |        |         |      |      |
|------|------|-----|-----|-----|--------|--------|---------|------|------|
| ATOM | 7618 | HG3 | GLU | 513 | 60.035 | 73.682 | 100.378 | 0.00 | 0.00 |
| ATOM | 7619 | CD  | GLU | 513 | 60.849 | 71.912 | 99.652  | 0.00 | 0.00 |
| ATOM | 7620 | OE1 | GLU | 513 | 62.015 | 71.859 | 99.055  | 0.00 | 0.00 |
| ATOM | 7621 | OE2 | GLU | 513 | 59.881 | 71.314 | 99.102  | 0.00 | 0.00 |
| ATOM | 7622 | C   | GLU | 513 | 60.483 | 75.522 | 102.227 | 0.00 | 0.00 |
| ATOM | 7623 | O   | GLU | 513 | 60.948 | 76.225 | 101.316 | 0.00 | 0.00 |
| ATOM | 7624 | N   | HID | 514 | 59.254 | 75.752 | 102.734 | 0.00 | 0.00 |
| ATOM | 7625 | H   | HID | 514 | 58.965 | 75.205 | 103.533 | 0.00 | 0.00 |
| ATOM | 7626 | CA  | HID | 514 | 58.474 | 76.841 | 102.264 | 0.00 | 0.00 |
| ATOM | 7627 | HA  | HID | 514 | 58.458 | 76.750 | 101.178 | 0.00 | 0.00 |
| ATOM | 7628 | CB  | HID | 514 | 57.025 | 76.734 | 102.765 | 0.00 | 0.00 |
| ATOM | 7629 | HB2 | HID | 514 | 56.941 | 76.459 | 103.816 | 0.00 | 0.00 |
| ATOM | 7630 | HB3 | HID | 514 | 56.495 | 77.686 | 102.771 | 0.00 | 0.00 |
| ATOM | 7631 | CG  | HID | 514 | 56.311 | 75.792 | 102.000 | 0.00 | 0.00 |
| ATOM | 7632 | ND1 | HID | 514 | 56.541 | 74.450 | 101.996 | 0.00 | 0.00 |
| ATOM | 7633 | HD1 | HID | 514 | 57.301 | 73.941 | 102.424 | 0.00 | 0.00 |
| ATOM | 7634 | CE1 | HID | 514 | 55.574 | 73.839 | 101.266 | 0.00 | 0.00 |
| ATOM | 7635 | HE1 | HID | 514 | 55.463 | 72.764 | 101.268 | 0.00 | 0.00 |
| ATOM | 7636 | NE2 | HID | 514 | 54.777 | 74.755 | 100.675 | 0.00 | 0.00 |
| ATOM | 7637 | CD2 | HID | 514 | 55.246 | 75.988 | 101.114 | 0.00 | 0.00 |
| ATOM | 7638 | HD2 | HID | 514 | 54.984 | 77.019 | 100.927 | 0.00 | 0.00 |
| ATOM | 7639 | C   | HID | 514 | 59.117 | 78.175 | 102.612 | 0.00 | 0.00 |
| ATOM | 7640 | O   | HID | 514 | 59.028 | 79.037 | 101.728 | 0.00 | 0.00 |
| ATOM | 7641 | N   | LEU | 515 | 59.715 | 78.404 | 103.792 | 0.00 | 0.00 |
| ATOM | 7642 | H   | LEU | 515 | 59.754 | 77.752 | 104.562 | 0.00 | 0.00 |
| ATOM | 7643 | CA  | LEU | 515 | 60.443 | 79.696 | 103.983 | 0.00 | 0.00 |

|      |      |      |     |     |        |        |         |      |      |
|------|------|------|-----|-----|--------|--------|---------|------|------|
| ATOM | 7644 | HA   | LEU | 515 | 59.686 | 80.463 | 103.818 | 0.00 | 0.00 |
| ATOM | 7645 | CB   | LEU | 515 | 60.887 | 79.935 | 105.447 | 0.00 | 0.00 |
| ATOM | 7646 | HB2  | LEU | 515 | 60.037 | 79.671 | 106.077 | 0.00 | 0.00 |
| ATOM | 7647 | HB3  | LEU | 515 | 61.800 | 79.411 | 105.732 | 0.00 | 0.00 |
| ATOM | 7648 | CG   | LEU | 515 | 61.255 | 81.441 | 105.766 | 0.00 | 0.00 |
| ATOM | 7649 | HG   | LEU | 515 | 62.188 | 81.753 | 105.298 | 0.00 | 0.00 |
| ATOM | 7650 | CD1  | LEU | 515 | 60.202 | 82.434 | 105.220 | 0.00 | 0.00 |
| ATOM | 7651 | 1HD1 | LEU | 515 | 60.145 | 82.550 | 104.138 | 0.00 | 0.00 |
| ATOM | 7652 | 2HD1 | LEU | 515 | 59.275 | 82.000 | 105.596 | 0.00 | 0.00 |
| ATOM | 7653 | 3HD1 | LEU | 515 | 60.399 | 83.413 | 105.657 | 0.00 | 0.00 |
| ATOM | 7654 | CD2  | LEU | 515 | 61.464 | 81.699 | 107.307 | 0.00 | 0.00 |
| ATOM | 7655 | 1HD2 | LEU | 515 | 60.521 | 81.579 | 107.841 | 0.00 | 0.00 |
| ATOM | 7656 | 2HD2 | LEU | 515 | 62.268 | 81.118 | 107.758 | 0.00 | 0.00 |
| ATOM | 7657 | 3HD2 | LEU | 515 | 61.716 | 82.758 | 107.364 | 0.00 | 0.00 |
| ATOM | 7658 | C    | LEU | 515 | 61.553 | 79.898 | 102.857 | 0.00 | 0.00 |
| ATOM | 7659 | O    | LEU | 515 | 61.637 | 80.993 | 102.326 | 0.00 | 0.00 |
| ATOM | 7660 | N    | ASP | 516 | 62.246 | 78.834 | 102.501 | 0.00 | 0.00 |
| ATOM | 7661 | H    | ASP | 516 | 62.061 | 77.966 | 102.984 | 0.00 | 0.00 |
| ATOM | 7662 | CA   | ASP | 516 | 63.250 | 78.840 | 101.418 | 0.00 | 0.00 |
| ATOM | 7663 | HA   | ASP | 516 | 63.925 | 79.674 | 101.614 | 0.00 | 0.00 |
| ATOM | 7664 | CB   | ASP | 516 | 64.127 | 77.631 | 101.483 | 0.00 | 0.00 |
| ATOM | 7665 | HB2  | ASP | 516 | 63.570 | 76.695 | 101.528 | 0.00 | 0.00 |
| ATOM | 7666 | HB3  | ASP | 516 | 64.914 | 77.591 | 100.730 | 0.00 | 0.00 |
| ATOM | 7667 | CG   | ASP | 516 | 64.909 | 77.613 | 102.849 | 0.00 | 0.00 |
| ATOM | 7668 | OD1  | ASP | 516 | 64.677 | 76.805 | 103.771 | 0.00 | 0.00 |
| ATOM | 7669 | OD2  | ASP | 516 | 65.701 | 78.504 | 103.038 | 0.00 | 0.00 |

|      |      |     |     |     |        |        |         |      |      |
|------|------|-----|-----|-----|--------|--------|---------|------|------|
| ATOM | 7670 | C   | ASP | 516 | 62.639 | 79.122 | 100.003 | 0.00 | 0.00 |
| ATOM | 7671 | O   | ASP | 516 | 63.380 | 79.555 | 99.108  | 0.00 | 0.00 |
| ATOM | 7672 | N   | MET | 517 | 61.304 | 79.049 | 99.837  | 0.00 | 0.00 |
| ATOM | 7673 | H   | MET | 517 | 60.725 | 78.861 | 100.642 | 0.00 | 0.00 |
| ATOM | 7674 | CA  | MET | 517 | 60.560 | 79.411 | 98.581  | 0.00 | 0.00 |
| ATOM | 7675 | HA  | MET | 517 | 61.231 | 79.570 | 97.737  | 0.00 | 0.00 |
| ATOM | 7676 | CB  | MET | 517 | 59.515 | 78.371 | 98.149  | 0.00 | 0.00 |
| ATOM | 7677 | HB2 | MET | 517 | 58.735 | 78.293 | 98.907  | 0.00 | 0.00 |
| ATOM | 7678 | HB3 | MET | 517 | 59.021 | 78.671 | 97.225  | 0.00 | 0.00 |
| ATOM | 7679 | CG  | MET | 517 | 60.296 | 77.011 | 97.875  | 0.00 | 0.00 |
| ATOM | 7680 | HG2 | MET | 517 | 61.089 | 77.173 | 97.145  | 0.00 | 0.00 |
| ATOM | 7681 | HG3 | MET | 517 | 60.823 | 76.867 | 98.818  | 0.00 | 0.00 |
| ATOM | 7682 | SD  | MET | 517 | 59.207 | 75.591 | 97.521  | 0.00 | 0.00 |
| ATOM | 7683 | CE  | MET | 517 | 60.581 | 74.330 | 97.383  | 0.00 | 0.00 |
| ATOM | 7684 | HE1 | MET | 517 | 61.359 | 74.728 | 96.730  | 0.00 | 0.00 |
| ATOM | 7685 | HE2 | MET | 517 | 61.005 | 74.205 | 98.379  | 0.00 | 0.00 |
| ATOM | 7686 | HE3 | MET | 517 | 60.068 | 73.463 | 96.965  | 0.00 | 0.00 |
| ATOM | 7687 | C   | MET | 517 | 59.793 | 80.777 | 98.747  | 0.00 | 0.00 |
| ATOM | 7688 | O   | MET | 517 | 59.782 | 81.544 | 97.803  | 0.00 | 0.00 |
| ATOM | 7689 | N   | LEU | 518 | 59.234 | 81.124 | 99.917  | 0.00 | 0.00 |
| ATOM | 7690 | H   | LEU | 518 | 59.204 | 80.441 | 100.660 | 0.00 | 0.00 |
| ATOM | 7691 | CA  | LEU | 518 | 58.445 | 82.378 | 100.171 | 0.00 | 0.00 |
| ATOM | 7692 | HA  | LEU | 518 | 57.691 | 82.480 | 99.390  | 0.00 | 0.00 |
| ATOM | 7693 | CB  | LEU | 518 | 57.781 | 82.358 | 101.536 | 0.00 | 0.00 |
| ATOM | 7694 | HB2 | LEU | 518 | 57.432 | 83.375 | 101.717 | 0.00 | 0.00 |
| ATOM | 7695 | HB3 | LEU | 518 | 58.545 | 82.036 | 102.244 | 0.00 | 0.00 |

|      |      |      |     |     |        |        |         |      |      |
|------|------|------|-----|-----|--------|--------|---------|------|------|
| ATOM | 7696 | CG   | LEU | 518 | 56.584 | 81.403 | 101.555 | 0.00 | 0.00 |
| ATOM | 7697 | HG   | LEU | 518 | 56.903 | 80.408 | 101.243 | 0.00 | 0.00 |
| ATOM | 7698 | CD1  | LEU | 518 | 56.281 | 81.180 | 103.025 | 0.00 | 0.00 |
| ATOM | 7699 | 1HD1 | LEU | 518 | 56.162 | 82.100 | 103.598 | 0.00 | 0.00 |
| ATOM | 7700 | 2HD1 | LEU | 518 | 55.425 | 80.516 | 103.140 | 0.00 | 0.00 |
| ATOM | 7701 | 3HD1 | LEU | 518 | 57.114 | 80.598 | 103.418 | 0.00 | 0.00 |
| ATOM | 7702 | CD2  | LEU | 518 | 55.432 | 81.893 | 100.733 | 0.00 | 0.00 |
| ATOM | 7703 | 1HD2 | LEU | 518 | 55.719 | 82.131 | 99.709  | 0.00 | 0.00 |
| ATOM | 7704 | 2HD2 | LEU | 518 | 54.664 | 81.125 | 100.638 | 0.00 | 0.00 |
| ATOM | 7705 | 3HD2 | LEU | 518 | 55.031 | 82.814 | 101.155 | 0.00 | 0.00 |
| ATOM | 7706 | C    | LEU | 518 | 59.481 | 83.551 | 100.236 | 0.00 | 0.00 |
| ATOM | 7707 | O    | LEU | 518 | 59.155 | 84.601 | 99.691  | 0.00 | 0.00 |
| ATOM | 7708 | N    | MET | 519 | 60.686 | 83.416 | 100.815 | 0.00 | 0.00 |
| ATOM | 7709 | H    | MET | 519 | 60.972 | 82.514 | 101.166 | 0.00 | 0.00 |
| ATOM | 7710 | CA   | MET | 519 | 61.598 | 84.514 | 101.039 | 0.00 | 0.00 |
| ATOM | 7711 | HA   | MET | 519 | 61.051 | 85.392 | 101.384 | 0.00 | 0.00 |
| ATOM | 7712 | CB   | MET | 519 | 62.672 | 84.150 | 102.105 | 0.00 | 0.00 |
| ATOM | 7713 | HB2  | MET | 519 | 63.083 | 85.031 | 102.600 | 0.00 | 0.00 |
| ATOM | 7714 | HB3  | MET | 519 | 62.105 | 83.611 | 102.863 | 0.00 | 0.00 |
| ATOM | 7715 | CG   | MET | 519 | 63.775 | 83.266 | 101.586 | 0.00 | 0.00 |
| ATOM | 7716 | HG2  | MET | 519 | 63.362 | 82.322 | 101.229 | 0.00 | 0.00 |
| ATOM | 7717 | HG3  | MET | 519 | 64.258 | 83.715 | 100.718 | 0.00 | 0.00 |
| ATOM | 7718 | SD   | MET | 519 | 64.980 | 82.870 | 102.904 | 0.00 | 0.00 |
| ATOM | 7719 | CE   | MET | 519 | 66.372 | 82.232 | 101.852 | 0.00 | 0.00 |
| ATOM | 7720 | HE1  | MET | 519 | 67.355 | 82.153 | 102.317 | 0.00 | 0.00 |
| ATOM | 7721 | HE2  | MET | 519 | 66.131 | 81.308 | 101.327 | 0.00 | 0.00 |

|      |      |      |     |     |        |        |         |      |      |
|------|------|------|-----|-----|--------|--------|---------|------|------|
| ATOM | 7722 | HE3  | MET | 519 | 66.543 | 82.956 | 101.056 | 0.00 | 0.00 |
| ATOM | 7723 | C    | MET | 519 | 62.190 | 84.958 | 99.671  | 0.00 | 0.00 |
| ATOM | 7724 | O    | MET | 519 | 62.437 | 86.130 | 99.438  | 0.00 | 0.00 |
| ATOM | 7725 | N    | VAL | 520 | 62.246 | 84.046 | 98.729  | 0.00 | 0.00 |
| ATOM | 7726 | H    | VAL | 520 | 62.209 | 83.088 | 99.047  | 0.00 | 0.00 |
| ATOM | 7727 | CA   | VAL | 520 | 62.724 | 84.274 | 97.348  | 0.00 | 0.00 |
| ATOM | 7728 | HA   | VAL | 520 | 63.498 | 85.041 | 97.322  | 0.00 | 0.00 |
| ATOM | 7729 | CB   | VAL | 520 | 63.431 | 83.025 | 96.741  | 0.00 | 0.00 |
| ATOM | 7730 | HB   | VAL | 520 | 62.649 | 82.270 | 96.660  | 0.00 | 0.00 |
| ATOM | 7731 | CG1  | VAL | 520 | 63.709 | 83.304 | 95.294  | 0.00 | 0.00 |
| ATOM | 7732 | 1HG1 | VAL | 520 | 62.738 | 83.282 | 94.799  | 0.00 | 0.00 |
| ATOM | 7733 | 2HG1 | VAL | 520 | 64.081 | 84.319 | 95.157  | 0.00 | 0.00 |
| ATOM | 7734 | 3HG1 | VAL | 520 | 64.330 | 82.516 | 94.868  | 0.00 | 0.00 |
| ATOM | 7735 | CG2  | VAL | 520 | 64.678 | 82.646 | 97.462  | 0.00 | 0.00 |
| ATOM | 7736 | 1HG2 | VAL | 520 | 65.488 | 83.169 | 96.954  | 0.00 | 0.00 |
| ATOM | 7737 | 2HG2 | VAL | 520 | 64.542 | 83.046 | 98.467  | 0.00 | 0.00 |
| ATOM | 7738 | 3HG2 | VAL | 520 | 64.899 | 81.585 | 97.351  | 0.00 | 0.00 |
| ATOM | 7739 | C    | VAL | 520 | 61.609 | 84.854 | 96.501  | 0.00 | 0.00 |
| ATOM | 7740 | O    | VAL | 520 | 61.842 | 85.996 | 96.030  | 0.00 | 0.00 |
| ATOM | 7741 | N    | CYS | 521 | 60.433 | 84.182 | 96.321  | 0.00 | 0.00 |
| ATOM | 7742 | H    | CYS | 521 | 60.261 | 83.247 | 96.664  | 0.00 | 0.00 |
| ATOM | 7743 | CA   | CYS | 521 | 59.341 | 84.602 | 95.406  | 0.00 | 0.00 |
| ATOM | 7744 | HA   | CYS | 521 | 59.751 | 84.920 | 94.447  | 0.00 | 0.00 |
| ATOM | 7745 | CB   | CYS | 521 | 58.334 | 83.515 | 95.185  | 0.00 | 0.00 |
| ATOM | 7746 | HB2  | CYS | 521 | 57.605 | 83.831 | 94.440  | 0.00 | 0.00 |
| ATOM | 7747 | HB3  | CYS | 521 | 58.833 | 82.629 | 94.792  | 0.00 | 0.00 |

|      |      |     |     |     |        |        |        |      |      |
|------|------|-----|-----|-----|--------|--------|--------|------|------|
| ATOM | 7748 | SG  | CYS | 521 | 57.422 | 83.224 | 96.684 | 0.00 | 0.00 |
| ATOM | 7749 | HG  | CYS | 521 | 58.368 | 82.382 | 97.109 | 0.00 | 0.00 |
| ATOM | 7750 | C   | CYS | 521 | 58.660 | 85.925 | 95.803 | 0.00 | 0.00 |
| ATOM | 7751 | O   | CYS | 521 | 58.003 | 86.584 | 94.944 | 0.00 | 0.00 |
| ATOM | 7752 | N   | HID | 522 | 58.773 | 86.400 | 97.057 | 0.00 | 0.00 |
| ATOM | 7753 | H   | HID | 522 | 59.249 | 85.827 | 97.738 | 0.00 | 0.00 |
| ATOM | 7754 | CA  | HID | 522 | 58.177 | 87.692 | 97.497 | 0.00 | 0.00 |
| ATOM | 7755 | HA  | HID | 522 | 57.636 | 88.139 | 96.663 | 0.00 | 0.00 |
| ATOM | 7756 | CB  | HID | 522 | 57.145 | 87.331 | 98.600 | 0.00 | 0.00 |
| ATOM | 7757 | HB2 | HID | 522 | 57.581 | 86.665 | 99.345 | 0.00 | 0.00 |
| ATOM | 7758 | HB3 | HID | 522 | 56.763 | 88.199 | 99.138 | 0.00 | 0.00 |
| ATOM | 7759 | CG  | HID | 522 | 55.866 | 86.645 | 98.102 | 0.00 | 0.00 |
| ATOM | 7760 | ND1 | HID | 522 | 54.998 | 87.190 | 97.241 | 0.00 | 0.00 |
| ATOM | 7761 | HD1 | HID | 522 | 55.007 | 88.127 | 96.863 | 0.00 | 0.00 |
| ATOM | 7762 | CE1 | HID | 522 | 54.069 | 86.194 | 96.967 | 0.00 | 0.00 |
| ATOM | 7763 | HE1 | HID | 522 | 53.309 | 86.225 | 96.201 | 0.00 | 0.00 |
| ATOM | 7764 | NE2 | HID | 522 | 54.416 | 85.066 | 97.624 | 0.00 | 0.00 |
| ATOM | 7765 | CD2 | HID | 522 | 55.554 | 85.343 | 98.379 | 0.00 | 0.00 |
| ATOM | 7766 | HD2 | HID | 522 | 56.093 | 84.571 | 98.908 | 0.00 | 0.00 |
| ATOM | 7767 | C   | HID | 522 | 59.199 | 88.756 | 97.983 | 0.00 | 0.00 |
| ATOM | 7768 | O   | HID | 522 | 58.786 | 89.780 | 98.518 | 0.00 | 0.00 |
| ATOM | 7769 | N   | HIE | 523 | 60.471 | 88.505 | 97.725 | 0.00 | 0.00 |
| ATOM | 7770 | H   | HIE | 523 | 60.760 | 87.668 | 97.239 | 0.00 | 0.00 |
| ATOM | 7771 | CA  | HIE | 523 | 61.616 | 89.477 | 98.064 | 0.00 | 0.00 |
| ATOM | 7772 | HA  | HIE | 523 | 62.522 | 88.884 | 98.190 | 0.00 | 0.00 |
| ATOM | 7773 | CB  | HIE | 523 | 61.765 | 90.514 | 96.991 | 0.00 | 0.00 |

|      |      |      |     |     |        |        |         |      |      |
|------|------|------|-----|-----|--------|--------|---------|------|------|
| ATOM | 7774 | HB2  | HIE | 523 | 62.104 | 90.059 | 96.060  | 0.00 | 0.00 |
| ATOM | 7775 | HB3  | HIE | 523 | 60.806 | 90.995 | 96.800  | 0.00 | 0.00 |
| ATOM | 7776 | CG   | HIE | 523 | 62.953 | 91.468 | 97.092  | 0.00 | 0.00 |
| ATOM | 7777 | ND1  | HIE | 523 | 64.289 | 91.143 | 97.229  | 0.00 | 0.00 |
| ATOM | 7778 | CE1  | HIE | 523 | 64.962 | 92.237 | 97.161  | 0.00 | 0.00 |
| ATOM | 7779 | HE1  | HIE | 523 | 66.005 | 92.248 | 97.443  | 0.00 | 0.00 |
| ATOM | 7780 | NE2  | HIE | 523 | 64.167 | 93.327 | 96.932  | 0.00 | 0.00 |
| ATOM | 7781 | HE2  | HIE | 523 | 64.435 | 94.294 | 96.818  | 0.00 | 0.00 |
| ATOM | 7782 | CD2  | HIE | 523 | 62.876 | 92.838 | 96.845  | 0.00 | 0.00 |
| ATOM | 7783 | HD2  | HIE | 523 | 62.052 | 93.441 | 96.492  | 0.00 | 0.00 |
| ATOM | 7784 | C    | HIE | 523 | 61.543 | 90.077 | 99.489  | 0.00 | 0.00 |
| ATOM | 7785 | O    | HIE | 523 | 61.899 | 91.214 | 99.781  | 0.00 | 0.00 |
| ATOM | 7786 | N    | LEU | 524 | 61.171 | 89.193 | 100.431 | 0.00 | 0.00 |
| ATOM | 7787 | H    | LEU | 524 | 60.990 | 88.240 | 100.150 | 0.00 | 0.00 |
| ATOM | 7788 | CA   | LEU | 524 | 60.953 | 89.512 | 101.814 | 0.00 | 0.00 |
| ATOM | 7789 | HA   | LEU | 524 | 60.357 | 90.423 | 101.872 | 0.00 | 0.00 |
| ATOM | 7790 | CB   | LEU | 524 | 60.135 | 88.343 | 102.368 | 0.00 | 0.00 |
| ATOM | 7791 | HB2  | LEU | 524 | 60.725 | 87.428 | 102.398 | 0.00 | 0.00 |
| ATOM | 7792 | HB3  | LEU | 524 | 59.968 | 88.635 | 103.404 | 0.00 | 0.00 |
| ATOM | 7793 | CG   | LEU | 524 | 58.750 | 88.000 | 101.718 | 0.00 | 0.00 |
| ATOM | 7794 | HG   | LEU | 524 | 58.806 | 87.828 | 100.643 | 0.00 | 0.00 |
| ATOM | 7795 | CD1  | LEU | 524 | 58.212 | 86.781 | 102.450 | 0.00 | 0.00 |
| ATOM | 7796 | 1HD1 | LEU | 524 | 57.370 | 86.306 | 101.947 | 0.00 | 0.00 |
| ATOM | 7797 | 2HD1 | LEU | 524 | 59.020 | 86.050 | 102.454 | 0.00 | 0.00 |
| ATOM | 7798 | 3HD1 | LEU | 524 | 57.950 | 87.064 | 103.470 | 0.00 | 0.00 |
| ATOM | 7799 | CD2  | LEU | 524 | 57.698 | 88.983 | 101.916 | 0.00 | 0.00 |

|      |      |      |     |     |        |        |         |      |      |
|------|------|------|-----|-----|--------|--------|---------|------|------|
| ATOM | 7800 | 1HD2 | LEU | 524 | 57.965 | 89.900 | 101.391 | 0.00 | 0.00 |
| ATOM | 7801 | 2HD2 | LEU | 524 | 56.681 | 88.667 | 101.681 | 0.00 | 0.00 |
| ATOM | 7802 | 3HD2 | LEU | 524 | 57.704 | 89.301 | 102.958 | 0.00 | 0.00 |
| ATOM | 7803 | C    | LEU | 524 | 62.242 | 89.886 | 102.468 | 0.00 | 0.00 |
| ATOM | 7804 | O    | LEU | 524 | 63.267 | 89.190 | 102.276 | 0.00 | 0.00 |
| ATOM | 7805 | N    | ASP | 525 | 62.181 | 90.880 | 103.352 | 0.00 | 0.00 |
| ATOM | 7806 | H    | ASP | 525 | 61.344 | 91.445 | 103.328 | 0.00 | 0.00 |
| ATOM | 7807 | CA   | ASP | 525 | 63.213 | 91.104 | 104.345 | 0.00 | 0.00 |
| ATOM | 7808 | HA   | ASP | 525 | 64.182 | 91.058 | 103.849 | 0.00 | 0.00 |
| ATOM | 7809 | CB   | ASP | 525 | 63.006 | 92.555 | 104.794 | 0.00 | 0.00 |
| ATOM | 7810 | HB2  | ASP | 525 | 62.073 | 92.625 | 105.353 | 0.00 | 0.00 |
| ATOM | 7811 | HB3  | ASP | 525 | 62.953 | 93.272 | 103.975 | 0.00 | 0.00 |
| ATOM | 7812 | CG   | ASP | 525 | 64.128 | 93.129 | 105.739 | 0.00 | 0.00 |
| ATOM | 7813 | OD1  | ASP | 525 | 65.035 | 93.879 | 105.260 | 0.00 | 0.00 |
| ATOM | 7814 | OD2  | ASP | 525 | 64.025 | 92.866 | 106.893 | 0.00 | 0.00 |
| ATOM | 7815 | C    | ASP | 525 | 63.217 | 90.181 | 105.561 | 0.00 | 0.00 |
| ATOM | 7816 | O    | ASP | 525 | 62.088 | 89.752 | 105.964 | 0.00 | 0.00 |
| ATOM | 7817 | N    | PRO | 526 | 64.337 | 89.899 | 106.267 | 0.00 | 0.00 |
| ATOM | 7818 | CD   | PRO | 526 | 65.740 | 90.072 | 105.860 | 0.00 | 0.00 |
| ATOM | 7819 | HD2  | PRO | 526 | 65.847 | 89.700 | 104.841 | 0.00 | 0.00 |
| ATOM | 7820 | HD3  | PRO | 526 | 65.989 | 91.133 | 105.879 | 0.00 | 0.00 |
| ATOM | 7821 | CG   | PRO | 526 | 66.633 | 89.256 | 106.739 | 0.00 | 0.00 |
| ATOM | 7822 | HG2  | PRO | 526 | 67.551 | 88.960 | 106.232 | 0.00 | 0.00 |
| ATOM | 7823 | HG3  | PRO | 526 | 66.826 | 89.886 | 107.607 | 0.00 | 0.00 |
| ATOM | 7824 | CB   | PRO | 526 | 65.685 | 88.121 | 107.175 | 0.00 | 0.00 |
| ATOM | 7825 | HB2  | PRO | 526 | 65.527 | 87.489 | 106.302 | 0.00 | 0.00 |



|      |      |      |     |     |        |        |         |      |      |
|------|------|------|-----|-----|--------|--------|---------|------|------|
| ATOM | 7826 | HB3  | PRO | 526 | 66.040 | 87.572 | 108.047 | 0.00 | 0.00 |
| ATOM | 7827 | CA   | PRO | 526 | 64.325 | 88.913 | 107.343 | 0.00 | 0.00 |
| ATOM | 7828 | HA   | PRO | 526 | 63.509 | 88.221 | 107.135 | 0.00 | 0.00 |
| ATOM | 7829 | C    | PRO | 526 | 64.217 | 89.503 | 108.779 | 0.00 | 0.00 |
| ATOM | 7830 | O    | PRO | 526 | 64.369 | 88.744 | 109.755 | 0.00 | 0.00 |
| ATOM | 7831 | N    | ASP | 527 | 64.041 | 90.808 | 108.861 | 0.00 | 0.00 |
| ATOM | 7832 | H    | ASP | 527 | 63.629 | 91.312 | 108.088 | 0.00 | 0.00 |
| ATOM | 7833 | CA   | ASP | 527 | 64.042 | 91.593 | 110.174 | 0.00 | 0.00 |
| ATOM | 7834 | HA   | ASP | 527 | 63.749 | 90.817 | 110.881 | 0.00 | 0.00 |
| ATOM | 7835 | CB   | ASP | 527 | 65.468 | 92.050 | 110.444 | 0.00 | 0.00 |
| ATOM | 7836 | HB2  | ASP | 527 | 65.497 | 92.468 | 111.450 | 0.00 | 0.00 |
| ATOM | 7837 | HB3  | ASP | 527 | 66.052 | 91.145 | 110.605 | 0.00 | 0.00 |
| ATOM | 7838 | CG   | ASP | 527 | 66.037 | 93.058 | 109.481 | 0.00 | 0.00 |
| ATOM | 7839 | OD1  | ASP | 527 | 65.589 | 94.268 | 109.535 | 0.00 | 0.00 |
| ATOM | 7840 | OD2  | ASP | 527 | 66.906 | 92.758 | 108.619 | 0.00 | 0.00 |
| ATOM | 7841 | C    | ASP | 527 | 63.046 | 92.748 | 110.354 | 0.00 | 0.00 |
| ATOM | 7842 | O    | ASP | 527 | 62.663 | 93.097 | 111.428 | 0.00 | 0.00 |
| ATOM | 7843 | N    | ILE | 528 | 62.553 | 93.278 | 109.291 | 0.00 | 0.00 |
| ATOM | 7844 | H    | ILE | 528 | 62.990 | 93.002 | 108.423 | 0.00 | 0.00 |
| ATOM | 7845 | CA   | ILE | 528 | 61.392 | 94.180 | 109.196 | 0.00 | 0.00 |
| ATOM | 7846 | HA   | ILE | 528 | 61.563 | 95.042 | 109.841 | 0.00 | 0.00 |
| ATOM | 7847 | CB   | ILE | 528 | 61.335 | 94.800 | 107.751 | 0.00 | 0.00 |
| ATOM | 7848 | HB   | ILE | 528 | 61.517 | 94.071 | 106.961 | 0.00 | 0.00 |
| ATOM | 7849 | CG2  | ILE | 528 | 59.958 | 95.459 | 107.581 | 0.00 | 0.00 |
| ATOM | 7850 | 1HG2 | ILE | 528 | 59.839 | 96.169 | 106.763 | 0.00 | 0.00 |
| ATOM | 7851 | 2HG2 | ILE | 528 | 59.184 | 94.695 | 107.495 | 0.00 | 0.00 |

|      |      |      |     |     |        |        |         |      |      |
|------|------|------|-----|-----|--------|--------|---------|------|------|
| ATOM | 7852 | 3HG2 | ILE | 528 | 59.648 | 95.869 | 108.542 | 0.00 | 0.00 |
| ATOM | 7853 | CG1  | ILE | 528 | 62.552 | 95.873 | 107.648 | 0.00 | 0.00 |
| ATOM | 7854 | 2HG1 | ILE | 528 | 62.604 | 96.476 | 108.554 | 0.00 | 0.00 |
| ATOM | 7855 | 3HG1 | ILE | 528 | 63.523 | 95.409 | 107.476 | 0.00 | 0.00 |
| ATOM | 7856 | CD1  | ILE | 528 | 62.317 | 96.897 | 106.485 | 0.00 | 0.00 |
| ATOM | 7857 | 1HD1 | ILE | 528 | 63.228 | 97.495 | 106.448 | 0.00 | 0.00 |
| ATOM | 7858 | 2HD1 | ILE | 528 | 62.166 | 96.422 | 105.516 | 0.00 | 0.00 |
| ATOM | 7859 | 3HD1 | ILE | 528 | 61.484 | 97.584 | 106.638 | 0.00 | 0.00 |
| ATOM | 7860 | C    | ILE | 528 | 60.140 | 93.372 | 109.617 | 0.00 | 0.00 |
| ATOM | 7861 | O    | ILE | 528 | 59.696 | 92.468 | 108.931 | 0.00 | 0.00 |
| ATOM | 7862 | N    | ALA | 529 | 59.504 | 93.858 | 110.696 | 0.00 | 0.00 |
| ATOM | 7863 | H    | ALA | 529 | 59.887 | 94.622 | 111.234 | 0.00 | 0.00 |
| ATOM | 7864 | CA   | ALA | 529 | 58.462 | 93.131 | 111.355 | 0.00 | 0.00 |
| ATOM | 7865 | HA   | ALA | 529 | 58.849 | 92.168 | 111.689 | 0.00 | 0.00 |
| ATOM | 7866 | CB   | ALA | 529 | 58.235 | 94.043 | 112.515 | 0.00 | 0.00 |
| ATOM | 7867 | HB1  | ALA | 529 | 57.777 | 94.957 | 112.137 | 0.00 | 0.00 |
| ATOM | 7868 | HB2  | ALA | 529 | 57.532 | 93.419 | 113.067 | 0.00 | 0.00 |
| ATOM | 7869 | HB3  | ALA | 529 | 59.097 | 94.272 | 113.141 | 0.00 | 0.00 |
| ATOM | 7870 | C    | ALA | 529 | 57.281 | 92.734 | 110.433 | 0.00 | 0.00 |
| ATOM | 7871 | O    | ALA | 529 | 56.759 | 91.605 | 110.574 | 0.00 | 0.00 |
| ATOM | 7872 | N    | GLU | 530 | 56.772 | 93.585 | 109.528 | 0.00 | 0.00 |
| ATOM | 7873 | H    | GLU | 530 | 57.027 | 94.560 | 109.455 | 0.00 | 0.00 |
| ATOM | 7874 | CA   | GLU | 530 | 55.596 | 93.206 | 108.759 | 0.00 | 0.00 |
| ATOM | 7875 | HA   | GLU | 530 | 54.836 | 92.659 | 109.317 | 0.00 | 0.00 |
| ATOM | 7876 | CB   | GLU | 530 | 54.881 | 94.522 | 108.375 | 0.00 | 0.00 |
| ATOM | 7877 | HB2  | GLU | 530 | 55.458 | 95.175 | 107.720 | 0.00 | 0.00 |

|      |      |     |     |     |        |        |         |      |      |
|------|------|-----|-----|-----|--------|--------|---------|------|------|
| ATOM | 7878 | HB3 | GLU | 530 | 54.033 | 94.264 | 107.741 | 0.00 | 0.00 |
| ATOM | 7879 | CG  | GLU | 530 | 54.239 | 95.369 | 109.507 | 0.00 | 0.00 |
| ATOM | 7880 | HG2 | GLU | 530 | 53.416 | 95.985 | 109.144 | 0.00 | 0.00 |
| ATOM | 7881 | HG3 | GLU | 530 | 53.926 | 94.713 | 110.320 | 0.00 | 0.00 |
| ATOM | 7882 | CD  | GLU | 530 | 55.328 | 96.299 | 110.123 | 0.00 | 0.00 |
| ATOM | 7883 | OE1 | GLU | 530 | 56.390 | 96.399 | 109.519 | 0.00 | 0.00 |
| ATOM | 7884 | OE2 | GLU | 530 | 55.048 | 96.827 | 111.180 | 0.00 | 0.00 |
| ATOM | 7885 | C   | GLU | 530 | 55.996 | 92.367 | 107.539 | 0.00 | 0.00 |
| ATOM | 7886 | O   | GLU | 530 | 55.099 | 91.883 | 106.809 | 0.00 | 0.00 |
| ATOM | 7887 | N   | ASP | 531 | 57.250 | 92.092 | 107.326 | 0.00 | 0.00 |
| ATOM | 7888 | H   | ASP | 531 | 57.982 | 92.382 | 107.958 | 0.00 | 0.00 |
| ATOM | 7889 | CA  | ASP | 531 | 57.784 | 91.105 | 106.376 | 0.00 | 0.00 |
| ATOM | 7890 | HA  | ASP | 531 | 57.011 | 90.919 | 105.631 | 0.00 | 0.00 |
| ATOM | 7891 | CB  | ASP | 531 | 59.008 | 91.653 | 105.618 | 0.00 | 0.00 |
| ATOM | 7892 | HB2 | ASP | 531 | 59.571 | 92.277 | 106.314 | 0.00 | 0.00 |
| ATOM | 7893 | HB3 | ASP | 531 | 59.682 | 90.870 | 105.271 | 0.00 | 0.00 |
| ATOM | 7894 | CG  | ASP | 531 | 58.689 | 92.434 | 104.360 | 0.00 | 0.00 |
| ATOM | 7895 | OD1 | ASP | 531 | 59.571 | 92.603 | 103.480 | 0.00 | 0.00 |
| ATOM | 7896 | OD2 | ASP | 531 | 57.557 | 93.045 | 104.216 | 0.00 | 0.00 |
| ATOM | 7897 | C   | ASP | 531 | 58.027 | 89.732 | 107.035 | 0.00 | 0.00 |
| ATOM | 7898 | O   | ASP | 531 | 57.662 | 88.672 | 106.575 | 0.00 | 0.00 |
| ATOM | 7899 | N   | VAL | 532 | 58.525 | 89.760 | 108.239 | 0.00 | 0.00 |
| ATOM | 7900 | H   | VAL | 532 | 58.988 | 90.608 | 108.532 | 0.00 | 0.00 |
| ATOM | 7901 | CA  | VAL | 532 | 58.564 | 88.591 | 109.190 | 0.00 | 0.00 |
| ATOM | 7902 | HA  | VAL | 532 | 59.130 | 87.800 | 108.697 | 0.00 | 0.00 |
| ATOM | 7903 | CB  | VAL | 532 | 59.408 | 89.015 | 110.396 | 0.00 | 0.00 |

|      |      |      |     |     |        |        |         |      |      |
|------|------|------|-----|-----|--------|--------|---------|------|------|
| ATOM | 7904 | HB   | VAL | 532 | 59.010 | 89.891 | 110.908 | 0.00 | 0.00 |
| ATOM | 7905 | CG1  | VAL | 532 | 59.614 | 87.868 | 111.402 | 0.00 | 0.00 |
| ATOM | 7906 | 1HG1 | VAL | 532 | 60.336 | 88.098 | 112.186 | 0.00 | 0.00 |
| ATOM | 7907 | 2HG1 | VAL | 532 | 58.732 | 87.451 | 111.886 | 0.00 | 0.00 |
| ATOM | 7908 | 3HG1 | VAL | 532 | 59.846 | 86.935 | 110.889 | 0.00 | 0.00 |
| ATOM | 7909 | CG2  | VAL | 532 | 60.857 | 89.265 | 109.930 | 0.00 | 0.00 |
| ATOM | 7910 | 1HG2 | VAL | 532 | 61.469 | 88.407 | 109.650 | 0.00 | 0.00 |
| ATOM | 7911 | 2HG2 | VAL | 532 | 60.827 | 89.984 | 109.111 | 0.00 | 0.00 |
| ATOM | 7912 | 3HG2 | VAL | 532 | 61.250 | 89.822 | 110.780 | 0.00 | 0.00 |
| ATOM | 7913 | C    | VAL | 532 | 57.125 | 88.105 | 109.581 | 0.00 | 0.00 |
| ATOM | 7914 | O    | VAL | 532 | 56.979 | 86.899 | 109.713 | 0.00 | 0.00 |
| ATOM | 7915 | N    | ALA | 533 | 56.136 | 88.964 | 109.756 | 0.00 | 0.00 |
| ATOM | 7916 | H    | ALA | 533 | 56.321 | 89.943 | 109.925 | 0.00 | 0.00 |
| ATOM | 7917 | CA   | ALA | 533 | 54.733 | 88.439 | 109.877 | 0.00 | 0.00 |
| ATOM | 7918 | HA   | ALA | 533 | 54.704 | 87.641 | 110.619 | 0.00 | 0.00 |
| ATOM | 7919 | CB   | ALA | 533 | 53.844 | 89.564 | 110.470 | 0.00 | 0.00 |
| ATOM | 7920 | HB1  | ALA | 533 | 53.446 | 90.060 | 109.585 | 0.00 | 0.00 |
| ATOM | 7921 | HB2  | ALA | 533 | 52.926 | 89.226 | 110.951 | 0.00 | 0.00 |
| ATOM | 7922 | HB3  | ALA | 533 | 54.444 | 90.145 | 111.170 | 0.00 | 0.00 |
| ATOM | 7923 | C    | ALA | 533 | 54.071 | 87.849 | 108.633 | 0.00 | 0.00 |
| ATOM | 7924 | O    | ALA | 533 | 53.398 | 86.801 | 108.744 | 0.00 | 0.00 |
| ATOM | 7925 | N    | PHE | 534 | 54.316 | 88.452 | 107.469 | 0.00 | 0.00 |
| ATOM | 7926 | H    | PHE | 534 | 55.014 | 89.182 | 107.486 | 0.00 | 0.00 |
| ATOM | 7927 | CA   | PHE | 534 | 53.988 | 87.865 | 106.181 | 0.00 | 0.00 |
| ATOM | 7928 | HA   | PHE | 534 | 52.907 | 87.750 | 106.106 | 0.00 | 0.00 |
| ATOM | 7929 | CB   | PHE | 534 | 54.394 | 88.861 | 105.072 | 0.00 | 0.00 |

|      |      |     |     |     |        |        |         |      |      |
|------|------|-----|-----|-----|--------|--------|---------|------|------|
| ATOM | 7930 | HB2 | PHE | 534 | 54.135 | 89.857 | 105.431 | 0.00 | 0.00 |
| ATOM | 7931 | HB3 | PHE | 534 | 55.484 | 88.852 | 105.073 | 0.00 | 0.00 |
| ATOM | 7932 | CG  | PHE | 534 | 53.982 | 88.577 | 103.669 | 0.00 | 0.00 |
| ATOM | 7933 | CD1 | PHE | 534 | 53.334 | 89.536 | 102.903 | 0.00 | 0.00 |
| ATOM | 7934 | HD1 | PHE | 534 | 53.179 | 90.524 | 103.311 | 0.00 | 0.00 |
| ATOM | 7935 | CE1 | PHE | 534 | 53.179 | 89.375 | 101.570 | 0.00 | 0.00 |
| ATOM | 7936 | HE1 | PHE | 534 | 52.823 | 90.195 | 100.964 | 0.00 | 0.00 |
| ATOM | 7937 | CZ  | PHE | 534 | 53.610 | 88.239 | 100.812 | 0.00 | 0.00 |
| ATOM | 7938 | HZ  | PHE | 534 | 53.429 | 88.093 | 99.757  | 0.00 | 0.00 |
| ATOM | 7939 | CE2 | PHE | 534 | 54.307 | 87.283 | 101.528 | 0.00 | 0.00 |
| ATOM | 7940 | HE2 | PHE | 534 | 54.601 | 86.385 | 101.004 | 0.00 | 0.00 |
| ATOM | 7941 | CD2 | PHE | 534 | 54.471 | 87.437 | 102.952 | 0.00 | 0.00 |
| ATOM | 7942 | HD2 | PHE | 534 | 55.070 | 86.678 | 103.433 | 0.00 | 0.00 |
| ATOM | 7943 | C   | PHE | 534 | 54.542 | 86.488 | 105.974 | 0.00 | 0.00 |
| ATOM | 7944 | O   | PHE | 534 | 53.754 | 85.651 | 105.551 | 0.00 | 0.00 |
| ATOM | 7945 | N   | ALA | 535 | 55.794 | 86.287 | 106.281 | 0.00 | 0.00 |
| ATOM | 7946 | H   | ALA | 535 | 56.448 | 87.021 | 106.511 | 0.00 | 0.00 |
| ATOM | 7947 | CA  | ALA | 535 | 56.364 | 84.983 | 106.029 | 0.00 | 0.00 |
| ATOM | 7948 | HA  | ALA | 535 | 56.211 | 84.528 | 105.050 | 0.00 | 0.00 |
| ATOM | 7949 | CB  | ALA | 535 | 57.866 | 85.094 | 106.131 | 0.00 | 0.00 |
| ATOM | 7950 | HB1 | ALA | 535 | 58.121 | 85.481 | 107.118 | 0.00 | 0.00 |
| ATOM | 7951 | HB2 | ALA | 535 | 58.334 | 84.118 | 106.008 | 0.00 | 0.00 |
| ATOM | 7952 | HB3 | ALA | 535 | 58.292 | 85.788 | 105.406 | 0.00 | 0.00 |
| ATOM | 7953 | C   | ALA | 535 | 55.789 | 83.974 | 107.045 | 0.00 | 0.00 |
| ATOM | 7954 | O   | ALA | 535 | 55.551 | 82.820 | 106.652 | 0.00 | 0.00 |
| ATOM | 7955 | N   | GLU | 536 | 55.585 | 84.454 | 108.281 | 0.00 | 0.00 |

|      |      |     |     |     |        |        |         |      |      |
|------|------|-----|-----|-----|--------|--------|---------|------|------|
| ATOM | 7956 | H   | GLU | 536 | 55.880 | 85.388 | 108.527 | 0.00 | 0.00 |
| ATOM | 7957 | CA  | GLU | 536 | 55.032 | 83.653 | 109.376 | 0.00 | 0.00 |
| ATOM | 7958 | HA  | GLU | 536 | 55.622 | 82.750 | 109.533 | 0.00 | 0.00 |
| ATOM | 7959 | CB  | GLU | 536 | 55.051 | 84.466 | 110.702 | 0.00 | 0.00 |
| ATOM | 7960 | HB2 | GLU | 536 | 55.935 | 85.068 | 110.912 | 0.00 | 0.00 |
| ATOM | 7961 | HB3 | GLU | 536 | 54.193 | 85.138 | 110.695 | 0.00 | 0.00 |
| ATOM | 7962 | CG  | GLU | 536 | 54.927 | 83.635 | 111.978 | 0.00 | 0.00 |
| ATOM | 7963 | HG2 | GLU | 536 | 54.075 | 82.964 | 111.869 | 0.00 | 0.00 |
| ATOM | 7964 | HG3 | GLU | 536 | 55.819 | 83.014 | 112.063 | 0.00 | 0.00 |
| ATOM | 7965 | CD  | GLU | 536 | 54.776 | 84.532 | 113.145 | 0.00 | 0.00 |
| ATOM | 7966 | OE1 | GLU | 536 | 53.632 | 84.922 | 113.436 | 0.00 | 0.00 |
| ATOM | 7967 | OE2 | GLU | 536 | 55.758 | 85.039 | 113.716 | 0.00 | 0.00 |
| ATOM | 7968 | C   | GLU | 536 | 53.542 | 83.292 | 109.144 | 0.00 | 0.00 |
| ATOM | 7969 | O   | GLU | 536 | 52.986 | 82.284 | 109.641 | 0.00 | 0.00 |
| ATOM | 7970 | N   | SER | 537 | 52.829 | 84.147 | 108.412 | 0.00 | 0.00 |
| ATOM | 7971 | H   | SER | 537 | 53.203 | 85.075 | 108.273 | 0.00 | 0.00 |
| ATOM | 7972 | CA  | SER | 537 | 51.539 | 83.875 | 107.893 | 0.00 | 0.00 |
| ATOM | 7973 | HA  | SER | 537 | 50.984 | 83.660 | 108.806 | 0.00 | 0.00 |
| ATOM | 7974 | CB  | SER | 537 | 50.937 | 85.214 | 107.323 | 0.00 | 0.00 |
| ATOM | 7975 | HB2 | SER | 537 | 51.513 | 85.514 | 106.448 | 0.00 | 0.00 |
| ATOM | 7976 | HB3 | SER | 537 | 49.910 | 85.093 | 106.979 | 0.00 | 0.00 |
| ATOM | 7977 | OG  | SER | 537 | 50.905 | 86.296 | 108.266 | 0.00 | 0.00 |
| ATOM | 7978 | HG  | SER | 537 | 51.801 | 86.607 | 108.416 | 0.00 | 0.00 |
| ATOM | 7979 | C   | SER | 537 | 51.470 | 82.776 | 106.766 | 0.00 | 0.00 |
| ATOM | 7980 | O   | SER | 537 | 50.470 | 82.127 | 106.620 | 0.00 | 0.00 |
| ATOM | 7981 | N   | ARG | 538 | 52.556 | 82.723 | 105.926 | 0.00 | 0.00 |

|      |      |      |     |     |        |        |         |      |      |
|------|------|------|-----|-----|--------|--------|---------|------|------|
| ATOM | 7982 | H    | ARG | 538 | 53.285 | 83.405 | 106.084 | 0.00 | 0.00 |
| ATOM | 7983 | CA   | ARG | 538 | 52.551 | 81.933 | 104.653 | 0.00 | 0.00 |
| ATOM | 7984 | HA   | ARG | 538 | 51.565 | 81.556 | 104.379 | 0.00 | 0.00 |
| ATOM | 7985 | CB   | ARG | 538 | 53.016 | 82.811 | 103.511 | 0.00 | 0.00 |
| ATOM | 7986 | HB2  | ARG | 538 | 53.265 | 82.114 | 102.712 | 0.00 | 0.00 |
| ATOM | 7987 | HB3  | ARG | 538 | 53.894 | 83.414 | 103.742 | 0.00 | 0.00 |
| ATOM | 7988 | CG   | ARG | 538 | 51.933 | 83.738 | 102.885 | 0.00 | 0.00 |
| ATOM | 7989 | HG2  | ARG | 538 | 51.272 | 84.104 | 103.671 | 0.00 | 0.00 |
| ATOM | 7990 | HG3  | ARG | 538 | 52.481 | 84.557 | 102.418 | 0.00 | 0.00 |
| ATOM | 7991 | CD   | ARG | 538 | 50.987 | 83.039 | 101.852 | 0.00 | 0.00 |
| ATOM | 7992 | HD2  | ARG | 538 | 50.476 | 82.177 | 102.281 | 0.00 | 0.00 |
| ATOM | 7993 | HD3  | ARG | 538 | 50.245 | 83.733 | 101.457 | 0.00 | 0.00 |
| ATOM | 7994 | NE   | ARG | 538 | 51.703 | 82.590 | 100.654 | 0.00 | 0.00 |
| ATOM | 7995 | HE   | ARG | 538 | 51.893 | 81.603 | 100.551 | 0.00 | 0.00 |
| ATOM | 7996 | CZ   | ARG | 538 | 52.309 | 83.275 | 99.726  | 0.00 | 0.00 |
| ATOM | 7997 | NH1  | ARG | 538 | 52.431 | 84.588 | 99.881  | 0.00 | 0.00 |
| ATOM | 7998 | 1HH1 | ARG | 538 | 52.925 | 85.170 | 99.219  | 0.00 | 0.00 |
| ATOM | 7999 | 2HH1 | ARG | 538 | 51.679 | 85.067 | 100.357 | 0.00 | 0.00 |
| ATOM | 8000 | NH2  | ARG | 538 | 52.851 | 82.823 | 98.618  | 0.00 | 0.00 |
| ATOM | 8001 | 1HH2 | ARG | 538 | 53.185 | 83.476 | 97.924  | 0.00 | 0.00 |
| ATOM | 8002 | 2HH2 | ARG | 538 | 52.914 | 81.839 | 98.399  | 0.00 | 0.00 |
| ATOM | 8003 | C    | ARG | 538 | 53.325 | 80.614 | 104.786 | 0.00 | 0.00 |
| ATOM | 8004 | O    | ARG | 538 | 52.999 | 79.677 | 104.077 | 0.00 | 0.00 |
| ATOM | 8005 | N    | ILE | 539 | 54.234 | 80.554 | 105.786 | 0.00 | 0.00 |
| ATOM | 8006 | H    | ILE | 539 | 54.581 | 81.345 | 106.308 | 0.00 | 0.00 |
| ATOM | 8007 | CA   | ILE | 539 | 54.555 | 79.224 | 106.310 | 0.00 | 0.00 |

|      |      |      |     |     |        |        |         |      |      |
|------|------|------|-----|-----|--------|--------|---------|------|------|
| ATOM | 8008 | HA   | ILE | 539 | 54.629 | 78.536 | 105.468 | 0.00 | 0.00 |
| ATOM | 8009 | CB   | ILE | 539 | 55.940 | 79.219 | 106.969 | 0.00 | 0.00 |
| ATOM | 8010 | HB   | ILE | 539 | 56.127 | 78.171 | 107.203 | 0.00 | 0.00 |
| ATOM | 8011 | CG2  | ILE | 539 | 57.089 | 79.539 | 105.987 | 0.00 | 0.00 |
| ATOM | 8012 | 1HG2 | ILE | 539 | 57.257 | 80.584 | 105.725 | 0.00 | 0.00 |
| ATOM | 8013 | 2HG2 | ILE | 539 | 57.959 | 78.953 | 106.282 | 0.00 | 0.00 |
| ATOM | 8014 | 3HG2 | ILE | 539 | 56.773 | 79.011 | 105.087 | 0.00 | 0.00 |
| ATOM | 8015 | CG1  | ILE | 539 | 55.965 | 79.939 | 108.299 | 0.00 | 0.00 |
| ATOM | 8016 | 2HG1 | ILE | 539 | 55.454 | 80.900 | 108.353 | 0.00 | 0.00 |
| ATOM | 8017 | 3HG1 | ILE | 539 | 55.444 | 79.284 | 108.996 | 0.00 | 0.00 |
| ATOM | 8018 | CD1  | ILE | 539 | 57.359 | 80.188 | 108.843 | 0.00 | 0.00 |
| ATOM | 8019 | 1HD1 | ILE | 539 | 57.881 | 79.254 | 109.048 | 0.00 | 0.00 |
| ATOM | 8020 | 2HD1 | ILE | 539 | 57.820 | 80.758 | 108.035 | 0.00 | 0.00 |
| ATOM | 8021 | 3HD1 | ILE | 539 | 57.103 | 80.794 | 109.712 | 0.00 | 0.00 |
| ATOM | 8022 | C    | ILE | 539 | 53.471 | 78.708 | 107.235 | 0.00 | 0.00 |
| ATOM | 8023 | O    | ILE | 539 | 52.906 | 79.380 | 108.150 | 0.00 | 0.00 |
| ATOM | 8024 | N    | ARG | 540 | 53.158 | 77.416 | 107.037 | 0.00 | 0.00 |
| ATOM | 8025 | H    | ARG | 540 | 53.798 | 76.876 | 106.472 | 0.00 | 0.00 |
| ATOM | 8026 | CA   | ARG | 540 | 52.338 | 76.643 | 108.037 | 0.00 | 0.00 |
| ATOM | 8027 | HA   | ARG | 540 | 52.340 | 77.222 | 108.961 | 0.00 | 0.00 |
| ATOM | 8028 | CB   | ARG | 540 | 50.894 | 76.469 | 107.574 | 0.00 | 0.00 |
| ATOM | 8029 | HB2  | ARG | 540 | 50.977 | 76.101 | 106.551 | 0.00 | 0.00 |
| ATOM | 8030 | HB3  | ARG | 540 | 50.363 | 75.735 | 108.180 | 0.00 | 0.00 |
| ATOM | 8031 | CG   | ARG | 540 | 50.123 | 77.851 | 107.382 | 0.00 | 0.00 |
| ATOM | 8032 | HG2  | ARG | 540 | 49.094 | 77.618 | 107.653 | 0.00 | 0.00 |
| ATOM | 8033 | HG3  | ARG | 540 | 50.578 | 78.615 | 108.013 | 0.00 | 0.00 |



|      |      |      |     |     |        |        |         |      |      |
|------|------|------|-----|-----|--------|--------|---------|------|------|
| ATOM | 8034 | CD   | ARG | 540 | 50.182 | 78.244 | 105.879 | 0.00 | 0.00 |
| ATOM | 8035 | HD2  | ARG | 540 | 51.204 | 78.400 | 105.533 | 0.00 | 0.00 |
| ATOM | 8036 | HD3  | ARG | 540 | 49.741 | 77.460 | 105.264 | 0.00 | 0.00 |
| ATOM | 8037 | NE   | ARG | 540 | 49.443 | 79.536 | 105.696 | 0.00 | 0.00 |
| ATOM | 8038 | HE   | ARG | 540 | 49.806 | 80.299 | 106.249 | 0.00 | 0.00 |
| ATOM | 8039 | CZ   | ARG | 540 | 48.195 | 79.683 | 105.242 | 0.00 | 0.00 |
| ATOM | 8040 | NH1  | ARG | 540 | 47.491 | 78.744 | 104.662 | 0.00 | 0.00 |
| ATOM | 8041 | 1HH1 | ARG | 540 | 46.553 | 79.018 | 104.407 | 0.00 | 0.00 |
| ATOM | 8042 | 2HH1 | ARG | 540 | 47.823 | 77.831 | 104.387 | 0.00 | 0.00 |
| ATOM | 8043 | NH2  | ARG | 540 | 47.700 | 80.870 | 105.417 | 0.00 | 0.00 |
| ATOM | 8044 | 1HH2 | ARG | 540 | 46.921 | 81.184 | 104.857 | 0.00 | 0.00 |
| ATOM | 8045 | 2HH2 | ARG | 540 | 48.255 | 81.598 | 105.843 | 0.00 | 0.00 |
| ATOM | 8046 | C    | ARG | 540 | 52.939 | 75.254 | 108.194 | 0.00 | 0.00 |
| ATOM | 8047 | O    | ARG | 540 | 53.458 | 74.718 | 107.207 | 0.00 | 0.00 |
| ATOM | 8048 | N    | ARG | 541 | 52.664 | 74.600 | 109.355 | 0.00 | 0.00 |
| ATOM | 8049 | H    | ARG | 541 | 52.172 | 75.058 | 110.109 | 0.00 | 0.00 |
| ATOM | 8050 | CA   | ARG | 541 | 53.153 | 73.200 | 109.477 | 0.00 | 0.00 |
| ATOM | 8051 | HA   | ARG | 541 | 53.786 | 72.916 | 108.636 | 0.00 | 0.00 |
| ATOM | 8052 | CB   | ARG | 541 | 53.985 | 72.970 | 110.741 | 0.00 | 0.00 |
| ATOM | 8053 | HB2  | ARG | 541 | 53.414 | 72.977 | 111.670 | 0.00 | 0.00 |
| ATOM | 8054 | HB3  | ARG | 541 | 54.231 | 71.921 | 110.576 | 0.00 | 0.00 |
| ATOM | 8055 | CG   | ARG | 541 | 55.342 | 73.782 | 110.741 | 0.00 | 0.00 |
| ATOM | 8056 | HG2  | ARG | 541 | 55.909 | 73.601 | 109.828 | 0.00 | 0.00 |
| ATOM | 8057 | HG3  | ARG | 541 | 55.061 | 74.835 | 110.718 | 0.00 | 0.00 |
| ATOM | 8058 | CD   | ARG | 541 | 56.109 | 73.507 | 112.042 | 0.00 | 0.00 |
| ATOM | 8059 | HD2  | ARG | 541 | 56.602 | 74.424 | 112.366 | 0.00 | 0.00 |

|      |      |      |     |     |        |        |         |      |      |
|------|------|------|-----|-----|--------|--------|---------|------|------|
| ATOM | 8060 | HD3  | ARG | 541 | 55.510 | 73.148 | 112.878 | 0.00 | 0.00 |
| ATOM | 8061 | NE   | ARG | 541 | 57.192 | 72.533 | 111.752 | 0.00 | 0.00 |
| ATOM | 8062 | HE   | ARG | 541 | 57.065 | 71.586 | 112.079 | 0.00 | 0.00 |
| ATOM | 8063 | CZ   | ARG | 541 | 58.335 | 72.805 | 111.109 | 0.00 | 0.00 |
| ATOM | 8064 | NH1  | ARG | 541 | 58.665 | 73.894 | 110.516 | 0.00 | 0.00 |
| ATOM | 8065 | 1HH1 | ARG | 541 | 59.469 | 74.024 | 109.918 | 0.00 | 0.00 |
| ATOM | 8066 | 2HH1 | ARG | 541 | 58.033 | 74.681 | 110.534 | 0.00 | 0.00 |
| ATOM | 8067 | NH2  | ARG | 541 | 59.223 | 71.879 | 111.118 | 0.00 | 0.00 |
| ATOM | 8068 | 1HH2 | ARG | 541 | 60.043 | 71.869 | 110.528 | 0.00 | 0.00 |
| ATOM | 8069 | 2HH2 | ARG | 541 | 59.042 | 71.081 | 111.710 | 0.00 | 0.00 |
| ATOM | 8070 | C    | ARG | 541 | 51.981 | 72.241 | 109.398 | 0.00 | 0.00 |
| ATOM | 8071 | O    | ARG | 541 | 52.160 | 71.065 | 109.038 | 0.00 | 0.00 |
| ATOM | 8072 | N    | GLU | 542 | 50.715 | 72.633 | 109.729 | 0.00 | 0.00 |
| ATOM | 8073 | H    | GLU | 542 | 50.556 | 73.573 | 110.063 | 0.00 | 0.00 |
| ATOM | 8074 | CA   | GLU | 542 | 49.516 | 71.696 | 109.846 | 0.00 | 0.00 |
| ATOM | 8075 | HA   | GLU | 542 | 49.857 | 70.674 | 109.680 | 0.00 | 0.00 |
| ATOM | 8076 | CB   | GLU | 542 | 48.848 | 71.787 | 111.238 | 0.00 | 0.00 |
| ATOM | 8077 | HB2  | GLU | 542 | 48.738 | 72.815 | 111.585 | 0.00 | 0.00 |
| ATOM | 8078 | HB3  | GLU | 542 | 47.873 | 71.303 | 111.273 | 0.00 | 0.00 |
| ATOM | 8079 | CG   | GLU | 542 | 49.728 | 71.106 | 112.346 | 0.00 | 0.00 |
| ATOM | 8080 | HG2  | GLU | 542 | 49.567 | 70.033 | 112.237 | 0.00 | 0.00 |
| ATOM | 8081 | HG3  | GLU | 542 | 50.794 | 71.258 | 112.178 | 0.00 | 0.00 |
| ATOM | 8082 | CD   | GLU | 542 | 49.458 | 71.547 | 113.736 | 0.00 | 0.00 |
| ATOM | 8083 | OE1  | GLU | 542 | 48.819 | 70.800 | 114.524 | 0.00 | 0.00 |
| ATOM | 8084 | OE2  | GLU | 542 | 49.815 | 72.728 | 114.150 | 0.00 | 0.00 |
| ATOM | 8085 | C    | GLU | 542 | 48.445 | 71.957 | 108.746 | 0.00 | 0.00 |

|      |      |      |     |     |        |        |         |      |      |
|------|------|------|-----|-----|--------|--------|---------|------|------|
| ATOM | 8086 | O    | GLU | 542 | 47.903 | 71.074 | 108.134 | 0.00 | 0.00 |
| ATOM | 8087 | N    | THR | 543 | 48.126 | 73.202 | 108.595 | 0.00 | 0.00 |
| ATOM | 8088 | H    | THR | 543 | 48.443 | 73.886 | 109.267 | 0.00 | 0.00 |
| ATOM | 8089 | CA   | THR | 543 | 46.995 | 73.570 | 107.633 | 0.00 | 0.00 |
| ATOM | 8090 | HA   | THR | 543 | 46.077 | 73.001 | 107.783 | 0.00 | 0.00 |
| ATOM | 8091 | CB   | THR | 543 | 46.451 | 74.964 | 107.681 | 0.00 | 0.00 |
| ATOM | 8092 | HB   | THR | 543 | 45.629 | 75.028 | 106.968 | 0.00 | 0.00 |
| ATOM | 8093 | CG2  | THR | 543 | 45.988 | 75.320 | 109.085 | 0.00 | 0.00 |
| ATOM | 8094 | 1HG2 | THR | 543 | 45.190 | 74.644 | 109.389 | 0.00 | 0.00 |
| ATOM | 8095 | 2HG2 | THR | 543 | 46.857 | 75.176 | 109.727 | 0.00 | 0.00 |
| ATOM | 8096 | 3HG2 | THR | 543 | 45.653 | 76.355 | 109.161 | 0.00 | 0.00 |
| ATOM | 8097 | OG1  | THR | 543 | 47.461 | 75.848 | 107.230 | 0.00 | 0.00 |
| ATOM | 8098 | HG1  | THR | 543 | 47.366 | 75.913 | 106.277 | 0.00 | 0.00 |
| ATOM | 8099 | C    | THR | 543 | 47.488 | 73.173 | 106.217 | 0.00 | 0.00 |
| ATOM | 8100 | O    | THR | 543 | 46.739 | 72.567 | 105.402 | 0.00 | 0.00 |
| ATOM | 8101 | N    | ILE | 544 | 48.772 | 73.250 | 105.964 | 0.00 | 0.00 |
| ATOM | 8102 | H    | ILE | 544 | 49.363 | 73.765 | 106.600 | 0.00 | 0.00 |
| ATOM | 8103 | CA   | ILE | 544 | 49.531 | 72.970 | 104.713 | 0.00 | 0.00 |
| ATOM | 8104 | HA   | ILE | 544 | 49.108 | 73.656 | 103.979 | 0.00 | 0.00 |
| ATOM | 8105 | CB   | ILE | 544 | 51.054 | 73.284 | 104.993 | 0.00 | 0.00 |
| ATOM | 8106 | HB   | ILE | 544 | 51.114 | 74.240 | 105.512 | 0.00 | 0.00 |
| ATOM | 8107 | CG2  | ILE | 544 | 51.617 | 72.192 | 105.968 | 0.00 | 0.00 |
| ATOM | 8108 | 1HG2 | ILE | 544 | 51.189 | 72.296 | 106.964 | 0.00 | 0.00 |
| ATOM | 8109 | 2HG2 | ILE | 544 | 51.613 | 71.171 | 105.585 | 0.00 | 0.00 |
| ATOM | 8110 | 3HG2 | ILE | 544 | 52.641 | 72.400 | 106.280 | 0.00 | 0.00 |
| ATOM | 8111 | CG1  | ILE | 544 | 51.932 | 73.381 | 103.736 | 0.00 | 0.00 |

|      |      |      |     |     |        |        |         |      |      |
|------|------|------|-----|-----|--------|--------|---------|------|------|
| ATOM | 8112 | 2HG1 | ILE | 544 | 51.975 | 72.485 | 103.115 | 0.00 | 0.00 |
| ATOM | 8113 | 3HG1 | ILE | 544 | 51.373 | 73.902 | 102.958 | 0.00 | 0.00 |
| ATOM | 8114 | CD1  | ILE | 544 | 53.313 | 73.830 | 104.008 | 0.00 | 0.00 |
| ATOM | 8115 | 1HD1 | ILE | 544 | 53.661 | 74.169 | 103.033 | 0.00 | 0.00 |
| ATOM | 8116 | 2HD1 | ILE | 544 | 53.468 | 74.729 | 104.604 | 0.00 | 0.00 |
| ATOM | 8117 | 3HD1 | ILE | 544 | 53.902 | 72.968 | 104.321 | 0.00 | 0.00 |
| ATOM | 8118 | C    | ILE | 544 | 49.382 | 71.496 | 104.222 | 0.00 | 0.00 |
| ATOM | 8119 | O    | ILE | 544 | 49.800 | 71.187 | 103.106 | 0.00 | 0.00 |
| ATOM | 8120 | N    | ALA | 545 | 48.644 | 70.666 | 104.949 | 0.00 | 0.00 |
| ATOM | 8121 | H    | ALA | 545 | 48.044 | 71.036 | 105.672 | 0.00 | 0.00 |
| ATOM | 8122 | CA   | ALA | 545 | 48.341 | 69.289 | 104.556 | 0.00 | 0.00 |
| ATOM | 8123 | HA   | ALA | 545 | 49.084 | 68.918 | 103.850 | 0.00 | 0.00 |
| ATOM | 8124 | CB   | ALA | 545 | 48.373 | 68.419 | 105.816 | 0.00 | 0.00 |
| ATOM | 8125 | HB1  | ALA | 545 | 48.111 | 67.364 | 105.744 | 0.00 | 0.00 |
| ATOM | 8126 | HB2  | ALA | 545 | 49.397 | 68.431 | 106.190 | 0.00 | 0.00 |
| ATOM | 8127 | HB3  | ALA | 545 | 47.740 | 68.835 | 106.601 | 0.00 | 0.00 |
| ATOM | 8128 | C    | ALA | 545 | 46.986 | 69.178 | 103.850 | 0.00 | 0.00 |
| ATOM | 8129 | O    | ALA | 545 | 46.569 | 68.036 | 103.544 | 0.00 | 0.00 |
| ATOM | 8130 | N    | ALA | 546 | 46.372 | 70.363 | 103.475 | 0.00 | 0.00 |
| ATOM | 8131 | H    | ALA | 546 | 46.738 | 71.232 | 103.837 | 0.00 | 0.00 |
| ATOM | 8132 | CA   | ALA | 546 | 45.071 | 70.305 | 102.786 | 0.00 | 0.00 |
| ATOM | 8133 | HA   | ALA | 546 | 44.348 | 69.769 | 103.401 | 0.00 | 0.00 |
| ATOM | 8134 | CB   | ALA | 546 | 44.468 | 71.708 | 102.745 | 0.00 | 0.00 |
| ATOM | 8135 | HB1  | ALA | 546 | 44.956 | 72.366 | 102.027 | 0.00 | 0.00 |
| ATOM | 8136 | HB2  | ALA | 546 | 43.405 | 71.611 | 102.524 | 0.00 | 0.00 |
| ATOM | 8137 | HB3  | ALA | 546 | 44.476 | 72.102 | 103.761 | 0.00 | 0.00 |

|      |      |     |     |     |        |        |         |      |      |
|------|------|-----|-----|-----|--------|--------|---------|------|------|
| ATOM | 8138 | C   | ALA | 546 | 45.037 | 69.699 | 101.444 | 0.00 | 0.00 |
| ATOM | 8139 | O   | ALA | 546 | 44.213 | 68.877 | 101.107 | 0.00 | 0.00 |
| ATOM | 8140 | N   | GLU | 547 | 45.981 | 70.186 | 100.638 | 0.00 | 0.00 |
| ATOM | 8141 | H   | GLU | 547 | 46.730 | 70.683 | 101.098 | 0.00 | 0.00 |
| ATOM | 8142 | CA  | GLU | 547 | 46.081 | 69.695 | 99.244  | 0.00 | 0.00 |
| ATOM | 8143 | HA  | GLU | 547 | 45.122 | 69.773 | 98.730  | 0.00 | 0.00 |
| ATOM | 8144 | CB  | GLU | 547 | 46.951 | 70.601 | 98.431  | 0.00 | 0.00 |
| ATOM | 8145 | HB2 | GLU | 547 | 47.902 | 70.244 | 98.826  | 0.00 | 0.00 |
| ATOM | 8146 | HB3 | GLU | 547 | 46.872 | 70.455 | 97.354  | 0.00 | 0.00 |
| ATOM | 8147 | CG  | GLU | 547 | 46.817 | 72.153 | 98.854  | 0.00 | 0.00 |
| ATOM | 8148 | HG2 | GLU | 547 | 45.755 | 72.332 | 99.024  | 0.00 | 0.00 |
| ATOM | 8149 | HG3 | GLU | 547 | 47.359 | 72.175 | 99.799  | 0.00 | 0.00 |
| ATOM | 8150 | CD  | GLU | 547 | 47.397 | 73.258 | 97.878  | 0.00 | 0.00 |
| ATOM | 8151 | OE1 | GLU | 547 | 46.687 | 74.243 | 97.702  | 0.00 | 0.00 |
| ATOM | 8152 | OE2 | GLU | 547 | 48.599 | 73.196 | 97.513  | 0.00 | 0.00 |
| ATOM | 8153 | C   | GLU | 547 | 46.361 | 68.192 | 99.128  | 0.00 | 0.00 |
| ATOM | 8154 | O   | GLU | 547 | 45.773 | 67.495 | 98.366  | 0.00 | 0.00 |
| ATOM | 8155 | N   | ASP | 548 | 47.089 | 67.668 | 100.140 | 0.00 | 0.00 |
| ATOM | 8156 | H   | ASP | 548 | 47.419 | 68.334 | 100.824 | 0.00 | 0.00 |
| ATOM | 8157 | CA  | ASP | 548 | 47.582 | 66.320 | 100.317 | 0.00 | 0.00 |
| ATOM | 8158 | HA  | ASP | 548 | 48.201 | 66.085 | 99.451  | 0.00 | 0.00 |
| ATOM | 8159 | CB  | ASP | 548 | 48.446 | 66.332 | 101.659 | 0.00 | 0.00 |
| ATOM | 8160 | HB2 | ASP | 548 | 49.174 | 67.142 | 101.618 | 0.00 | 0.00 |
| ATOM | 8161 | HB3 | ASP | 548 | 47.913 | 66.370 | 102.609 | 0.00 | 0.00 |
| ATOM | 8162 | CG  | ASP | 548 | 49.068 | 65.033 | 101.969 | 0.00 | 0.00 |
| ATOM | 8163 | OD1 | ASP | 548 | 50.157 | 64.815 | 101.369 | 0.00 | 0.00 |

ATOM 8164 OD2 ASP 548 48.548 64.254 102.859 0.00 0.00  
ATOM 8165 C ASP 548 46.359 65.304 100.323 0.00 0.00  
ATOM 8166 O ASP 548 46.425 64.196 99.720 0.00 0.00  
ATOM 8167 N VAL 549 45.210 65.672 100.901 0.00 0.00  
ATOM 8168 H VAL 549 45.284 66.641 101.176 0.00 0.00  
ATOM 8169 CA VAL 549 43.931 64.930 101.013 0.00 0.00  
ATOM 8170 HA VAL 549 44.154 63.900 100.735 0.00 0.00  
ATOM 8171 CB VAL 549 43.485 64.841 102.457 0.00 0.00  
ATOM 8172 HB VAL 549 44.235 64.209 102.931 0.00 0.00  
ATOM 8173 CG1 VAL 549 43.379 66.137 103.207 0.00 0.00  
ATOM 8174 1HG1 VAL 549 42.619 66.798 102.789 0.00 0.00  
ATOM 8175 2HG1 VAL 549 43.017 65.975 104.222 0.00 0.00  
ATOM 8176 3HG1 VAL 549 44.342 66.609 103.402 0.00 0.00  
ATOM 8177 CG2 VAL 549 42.251 64.015 102.687 0.00 0.00  
ATOM 8178 1HG2 VAL 549 42.297 63.711 103.733 0.00 0.00  
ATOM 8179 2HG2 VAL 549 41.331 64.561 102.483 0.00 0.00  
ATOM 8180 3HG2 VAL 549 42.391 63.188 101.991 0.00 0.00  
ATOM 8181 C VAL 549 42.878 65.389 99.947 0.00 0.00  
ATOM 8182 O VAL 549 42.183 64.569 99.393 0.00 0.00  
ATOM 8183 N LEU 550 42.724 66.737 99.752 0.00 0.00  
ATOM 8184 H LEU 550 43.338 67.416 100.180 0.00 0.00  
ATOM 8185 CA LEU 550 41.575 67.263 98.969 0.00 0.00  
ATOM 8186 HA LEU 550 40.704 66.688 99.283 0.00 0.00  
ATOM 8187 CB LEU 550 41.346 68.795 99.290 0.00 0.00  
ATOM 8188 HB2 LEU 550 42.230 69.368 99.013 0.00 0.00  
ATOM 8189 HB3 LEU 550 40.478 69.162 98.741 0.00 0.00

|      |      |      |     |     |        |        |         |      |      |
|------|------|------|-----|-----|--------|--------|---------|------|------|
| ATOM | 8190 | CG   | LEU | 550 | 40.914 | 69.082 | 100.753 | 0.00 | 0.00 |
| ATOM | 8191 | HG   | LEU | 550 | 41.630 | 68.683 | 101.471 | 0.00 | 0.00 |
| ATOM | 8192 | CD1  | LEU | 550 | 40.804 | 70.563 | 100.989 | 0.00 | 0.00 |
| ATOM | 8193 | 1HD1 | LEU | 550 | 41.618 | 71.174 | 100.599 | 0.00 | 0.00 |
| ATOM | 8194 | 2HD1 | LEU | 550 | 39.922 | 70.901 | 100.445 | 0.00 | 0.00 |
| ATOM | 8195 | 3HD1 | LEU | 550 | 40.603 | 70.630 | 102.058 | 0.00 | 0.00 |
| ATOM | 8196 | CD2  | LEU | 550 | 39.525 | 68.459 | 101.179 | 0.00 | 0.00 |
| ATOM | 8197 | 1HD2 | LEU | 550 | 39.191 | 68.877 | 102.129 | 0.00 | 0.00 |
| ATOM | 8198 | 2HD2 | LEU | 550 | 38.776 | 68.497 | 100.388 | 0.00 | 0.00 |
| ATOM | 8199 | 3HD2 | LEU | 550 | 39.666 | 67.437 | 101.528 | 0.00 | 0.00 |
| ATOM | 8200 | C    | LEU | 550 | 41.685 | 67.023 | 97.461  | 0.00 | 0.00 |
| ATOM | 8201 | O    | LEU | 550 | 40.670 | 66.934 | 96.816  | 0.00 | 0.00 |
| ATOM | 8202 | N    | HIE | 551 | 42.894 | 66.583 | 96.969  | 0.00 | 0.00 |
| ATOM | 8203 | H    | HIE | 551 | 43.677 | 66.584 | 97.607  | 0.00 | 0.00 |
| ATOM | 8204 | CA   | HIE | 551 | 43.067 | 65.771 | 95.728  | 0.00 | 0.00 |
| ATOM | 8205 | HA   | HIE | 551 | 42.644 | 66.416 | 94.957  | 0.00 | 0.00 |
| ATOM | 8206 | CB   | HIE | 551 | 44.515 | 65.697 | 95.432  | 0.00 | 0.00 |
| ATOM | 8207 | HB2  | HIE | 551 | 45.063 | 65.513 | 96.355  | 0.00 | 0.00 |
| ATOM | 8208 | HB3  | HIE | 551 | 44.657 | 64.774 | 94.869  | 0.00 | 0.00 |
| ATOM | 8209 | CG   | HIE | 551 | 44.997 | 66.863 | 94.605  | 0.00 | 0.00 |
| ATOM | 8210 | ND1  | HIE | 551 | 44.364 | 67.263 | 93.434  | 0.00 | 0.00 |
| ATOM | 8211 | CE1  | HIE | 551 | 44.988 | 68.372 | 93.070  | 0.00 | 0.00 |
| ATOM | 8212 | HE1  | HIE | 551 | 44.743 | 68.868 | 92.142  | 0.00 | 0.00 |
| ATOM | 8213 | NE2  | HIE | 551 | 46.015 | 68.612 | 93.897  | 0.00 | 0.00 |
| ATOM | 8214 | HE2  | HIE | 551 | 46.759 | 69.285 | 93.778  | 0.00 | 0.00 |
| ATOM | 8215 | CD2  | HIE | 551 | 45.992 | 67.722 | 94.914  | 0.00 | 0.00 |

|      |      |      |     |     |        |        |         |      |      |
|------|------|------|-----|-----|--------|--------|---------|------|------|
| ATOM | 8216 | HD2  | HIE | 551 | 46.491 | 67.683 | 95.871  | 0.00 | 0.00 |
| ATOM | 8217 | C    | HIE | 551 | 42.358 | 64.442 | 95.806  | 0.00 | 0.00 |
| ATOM | 8218 | O    | HIE | 551 | 41.678 | 64.193 | 94.782  | 0.00 | 0.00 |
| ATOM | 8219 | N    | ASP | 552 | 42.646 | 63.594 | 96.753  | 0.00 | 0.00 |
| ATOM | 8220 | H    | ASP | 552 | 43.191 | 63.837 | 97.569  | 0.00 | 0.00 |
| ATOM | 8221 | CA   | ASP | 552 | 42.008 | 62.292 | 96.834  | 0.00 | 0.00 |
| ATOM | 8222 | HA   | ASP | 552 | 42.274 | 61.629 | 96.010  | 0.00 | 0.00 |
| ATOM | 8223 | CB   | ASP | 552 | 42.539 | 61.572 | 98.110  | 0.00 | 0.00 |
| ATOM | 8224 | HB2  | ASP | 552 | 41.949 | 61.951 | 98.944  | 0.00 | 0.00 |
| ATOM | 8225 | HB3  | ASP | 552 | 43.579 | 61.888 | 98.188  | 0.00 | 0.00 |
| ATOM | 8226 | CG   | ASP | 552 | 42.627 | 60.051 | 97.973  | 0.00 | 0.00 |
| ATOM | 8227 | OD1  | ASP | 552 | 43.260 | 59.625 | 96.942  | 0.00 | 0.00 |
| ATOM | 8228 | OD2  | ASP | 552 | 42.010 | 59.272 | 98.764  | 0.00 | 0.00 |
| ATOM | 8229 | C    | ASP | 552 | 40.461 | 62.299 | 96.908  | 0.00 | 0.00 |
| ATOM | 8230 | O    | ASP | 552 | 39.802 | 61.368 | 96.407  | 0.00 | 0.00 |
| ATOM | 8231 | N    | LEU | 553 | 39.876 | 63.305 | 97.620  | 0.00 | 0.00 |
| ATOM | 8232 | H    | LEU | 553 | 40.511 | 63.876 | 98.159  | 0.00 | 0.00 |
| ATOM | 8233 | CA   | LEU | 553 | 38.496 | 63.571 | 97.835  | 0.00 | 0.00 |
| ATOM | 8234 | HA   | LEU | 553 | 38.015 | 62.645 | 98.151  | 0.00 | 0.00 |
| ATOM | 8235 | CB   | LEU | 553 | 38.466 | 64.558 | 99.038  | 0.00 | 0.00 |
| ATOM | 8236 | HB2  | LEU | 553 | 39.194 | 64.303 | 99.808  | 0.00 | 0.00 |
| ATOM | 8237 | HB3  | LEU | 553 | 38.736 | 65.526 | 98.614  | 0.00 | 0.00 |
| ATOM | 8238 | CG   | LEU | 553 | 37.192 | 64.539 | 99.851  | 0.00 | 0.00 |
| ATOM | 8239 | HG   | LEU | 553 | 36.393 | 64.381 | 99.127  | 0.00 | 0.00 |
| ATOM | 8240 | CD1  | LEU | 553 | 37.194 | 63.322 | 100.824 | 0.00 | 0.00 |
| ATOM | 8241 | 1HD1 | LEU | 553 | 37.923 | 63.308 | 101.634 | 0.00 | 0.00 |



|      |      |      |     |     |        |        |         |      |      |
|------|------|------|-----|-----|--------|--------|---------|------|------|
| ATOM | 8242 | 2HD1 | LEU | 553 | 36.233 | 63.388 | 101.334 | 0.00 | 0.00 |
| ATOM | 8243 | 3HD1 | LEU | 553 | 37.218 | 62.388 | 100.262 | 0.00 | 0.00 |
| ATOM | 8244 | CD2  | LEU | 553 | 36.979 | 65.827 | 100.621 | 0.00 | 0.00 |
| ATOM | 8245 | 1HD2 | LEU | 553 | 36.084 | 65.833 | 101.244 | 0.00 | 0.00 |
| ATOM | 8246 | 2HD2 | LEU | 553 | 37.848 | 66.029 | 101.247 | 0.00 | 0.00 |
| ATOM | 8247 | 3HD2 | LEU | 553 | 36.933 | 66.642 | 99.897  | 0.00 | 0.00 |
| ATOM | 8248 | C    | LEU | 553 | 37.785 | 64.088 | 96.508  | 0.00 | 0.00 |
| ATOM | 8249 | O    | LEU | 553 | 36.561 | 64.037 | 96.554  | 0.00 | 0.00 |
| ATOM | 8250 | N    | GLY | 554 | 38.521 | 64.481 | 95.511  | 0.00 | 0.00 |
| ATOM | 8251 | H    | GLY | 554 | 39.515 | 64.597 | 95.647  | 0.00 | 0.00 |
| ATOM | 8252 | CA   | GLY | 554 | 37.880 | 65.018 | 94.242  | 0.00 | 0.00 |
| ATOM | 8253 | HA2  | GLY | 554 | 38.481 | 64.869 | 93.345  | 0.00 | 0.00 |
| ATOM | 8254 | HA3  | GLY | 554 | 36.900 | 64.542 | 94.211  | 0.00 | 0.00 |
| ATOM | 8255 | C    | GLY | 554 | 37.577 | 66.517 | 94.348  | 0.00 | 0.00 |
| ATOM | 8256 | O    | GLY | 554 | 36.846 | 67.048 | 93.476  | 0.00 | 0.00 |
| ATOM | 8257 | N    | ALA | 555 | 37.967 | 67.289 | 95.390  | 0.00 | 0.00 |
| ATOM | 8258 | H    | ALA | 555 | 38.654 | 66.841 | 95.980  | 0.00 | 0.00 |
| ATOM | 8259 | CA   | ALA | 555 | 37.548 | 68.599 | 95.817  | 0.00 | 0.00 |
| ATOM | 8260 | HA   | ALA | 555 | 36.535 | 68.764 | 95.452  | 0.00 | 0.00 |
| ATOM | 8261 | CB   | ALA | 555 | 37.641 | 68.581 | 97.347  | 0.00 | 0.00 |
| ATOM | 8262 | HB1  | ALA | 555 | 38.515 | 68.036 | 97.705  | 0.00 | 0.00 |
| ATOM | 8263 | HB2  | ALA | 555 | 37.678 | 69.575 | 97.794  | 0.00 | 0.00 |
| ATOM | 8264 | HB3  | ALA | 555 | 36.769 | 68.083 | 97.770  | 0.00 | 0.00 |
| ATOM | 8265 | C    | ALA | 555 | 38.449 | 69.759 | 95.249  | 0.00 | 0.00 |
| ATOM | 8266 | O    | ALA | 555 | 38.054 | 70.857 | 95.186  | 0.00 | 0.00 |
| ATOM | 8267 | N    | PHE | 556 | 39.712 | 69.438 | 95.023  | 0.00 | 0.00 |

|      |      |     |     |     |        |        |        |      |      |
|------|------|-----|-----|-----|--------|--------|--------|------|------|
| ATOM | 8268 | H   | PHE | 556 | 40.023 | 68.521 | 95.309 | 0.00 | 0.00 |
| ATOM | 8269 | CA  | PHE | 556 | 40.646 | 70.159 | 94.238 | 0.00 | 0.00 |
| ATOM | 8270 | HA  | PHE | 556 | 40.317 | 71.151 | 93.928 | 0.00 | 0.00 |
| ATOM | 8271 | CB  | PHE | 556 | 41.955 | 70.481 | 94.943 | 0.00 | 0.00 |
| ATOM | 8272 | HB2 | PHE | 556 | 42.231 | 69.579 | 95.488 | 0.00 | 0.00 |
| ATOM | 8273 | HB3 | PHE | 556 | 42.659 | 70.808 | 94.178 | 0.00 | 0.00 |
| ATOM | 8274 | CG  | PHE | 556 | 42.118 | 71.481 | 96.084 | 0.00 | 0.00 |
| ATOM | 8275 | CD1 | PHE | 556 | 43.296 | 72.234 | 96.276 | 0.00 | 0.00 |
| ATOM | 8276 | HD1 | PHE | 556 | 44.114 | 72.277 | 95.572 | 0.00 | 0.00 |
| ATOM | 8277 | CE1 | PHE | 556 | 43.276 | 73.242 | 97.212 | 0.00 | 0.00 |
| ATOM | 8278 | HE1 | PHE | 556 | 44.181 | 73.827 | 97.290 | 0.00 | 0.00 |
| ATOM | 8279 | CZ  | PHE | 556 | 42.170 | 73.442 | 98.037 | 0.00 | 0.00 |
| ATOM | 8280 | HZ  | PHE | 556 | 42.250 | 74.203 | 98.799 | 0.00 | 0.00 |
| ATOM | 8281 | CE2 | PHE | 556 | 41.042 | 72.598 | 97.971 | 0.00 | 0.00 |
| ATOM | 8282 | HE2 | PHE | 556 | 40.262 | 72.779 | 98.695 | 0.00 | 0.00 |
| ATOM | 8283 | CD2 | PHE | 556 | 40.979 | 71.733 | 96.899 | 0.00 | 0.00 |
| ATOM | 8284 | HD2 | PHE | 556 | 40.031 | 71.221 | 96.824 | 0.00 | 0.00 |
| ATOM | 8285 | C   | PHE | 556 | 40.874 | 69.434 | 92.950 | 0.00 | 0.00 |
| ATOM | 8286 | O   | PHE | 556 | 41.238 | 68.279 | 92.900 | 0.00 | 0.00 |
| ATOM | 8287 | N   | SER | 557 | 40.584 | 70.127 | 91.840 | 0.00 | 0.00 |
| ATOM | 8288 | H   | SER | 557 | 40.529 | 71.131 | 91.929 | 0.00 | 0.00 |
| ATOM | 8289 | CA  | SER | 557 | 40.112 | 69.462 | 90.661 | 0.00 | 0.00 |
| ATOM | 8290 | HA  | SER | 557 | 39.626 | 68.536 | 90.968 | 0.00 | 0.00 |
| ATOM | 8291 | CB  | SER | 557 | 38.975 | 70.355 | 89.962 | 0.00 | 0.00 |
| ATOM | 8292 | HB2 | SER | 557 | 39.524 | 71.268 | 89.731 | 0.00 | 0.00 |
| ATOM | 8293 | HB3 | SER | 557 | 38.739 | 69.939 | 88.983 | 0.00 | 0.00 |

|      |      |      |     |     |        |        |        |      |      |
|------|------|------|-----|-----|--------|--------|--------|------|------|
| ATOM | 8294 | OG   | SER | 557 | 37.814 | 70.477 | 90.699 | 0.00 | 0.00 |
| ATOM | 8295 | HG   | SER | 557 | 37.500 | 69.582 | 90.550 | 0.00 | 0.00 |
| ATOM | 8296 | C    | SER | 557 | 41.206 | 69.170 | 89.621 | 0.00 | 0.00 |
| ATOM | 8297 | O    | SER | 557 | 40.876 | 68.662 | 88.514 | 0.00 | 0.00 |
| ATOM | 8298 | N    | LEU | 558 | 42.447 | 69.552 | 89.909 | 0.00 | 0.00 |
| ATOM | 8299 | H    | LEU | 558 | 42.475 | 70.080 | 90.769 | 0.00 | 0.00 |
| ATOM | 8300 | CA   | LEU | 558 | 43.571 | 69.747 | 88.950 | 0.00 | 0.00 |
| ATOM | 8301 | HA   | LEU | 558 | 43.901 | 68.779 | 88.572 | 0.00 | 0.00 |
| ATOM | 8302 | CB   | LEU | 558 | 43.262 | 70.650 | 87.773 | 0.00 | 0.00 |
| ATOM | 8303 | HB2  | LEU | 558 | 44.140 | 70.657 | 87.127 | 0.00 | 0.00 |
| ATOM | 8304 | HB3  | LEU | 558 | 42.520 | 70.168 | 87.137 | 0.00 | 0.00 |
| ATOM | 8305 | CG   | LEU | 558 | 42.972 | 72.113 | 88.022 | 0.00 | 0.00 |
| ATOM | 8306 | HG   | LEU | 558 | 43.845 | 72.542 | 88.513 | 0.00 | 0.00 |
| ATOM | 8307 | CD1  | LEU | 558 | 42.899 | 72.876 | 86.690 | 0.00 | 0.00 |
| ATOM | 8308 | 1HD1 | LEU | 558 | 42.167 | 72.408 | 86.031 | 0.00 | 0.00 |
| ATOM | 8309 | 2HD1 | LEU | 558 | 42.614 | 73.912 | 86.871 | 0.00 | 0.00 |
| ATOM | 8310 | 3HD1 | LEU | 558 | 43.857 | 72.845 | 86.172 | 0.00 | 0.00 |
| ATOM | 8311 | CD2  | LEU | 558 | 41.653 | 72.420 | 88.718 | 0.00 | 0.00 |
| ATOM | 8312 | 1HD2 | LEU | 558 | 40.828 | 71.836 | 88.308 | 0.00 | 0.00 |
| ATOM | 8313 | 2HD2 | LEU | 558 | 41.810 | 72.186 | 89.771 | 0.00 | 0.00 |
| ATOM | 8314 | 3HD2 | LEU | 558 | 41.475 | 73.489 | 88.828 | 0.00 | 0.00 |
| ATOM | 8315 | C    | LEU | 558 | 44.889 | 70.125 | 89.673 | 0.00 | 0.00 |
| ATOM | 8316 | O    | LEU | 558 | 44.870 | 70.889 | 90.656 | 0.00 | 0.00 |
| ATOM | 8317 | N    | THR | 559 | 46.017 | 69.646 | 89.220 | 0.00 | 0.00 |
| ATOM | 8318 | H    | THR | 559 | 45.840 | 69.049 | 88.424 | 0.00 | 0.00 |
| ATOM | 8319 | CA   | THR | 559 | 47.361 | 70.094 | 89.637 | 0.00 | 0.00 |

|      |      |      |     |     |        |        |        |      |      |
|------|------|------|-----|-----|--------|--------|--------|------|------|
| ATOM | 8320 | HA   | THR | 559 | 47.275 | 70.253 | 90.712 | 0.00 | 0.00 |
| ATOM | 8321 | CB   | THR | 559 | 48.482 | 69.034 | 89.427 | 0.00 | 0.00 |
| ATOM | 8322 | HB   | THR | 559 | 49.433 | 69.565 | 89.393 | 0.00 | 0.00 |
| ATOM | 8323 | CG2  | THR | 559 | 48.492 | 67.930 | 90.530 | 0.00 | 0.00 |
| ATOM | 8324 | 1HG2 | THR | 559 | 49.136 | 67.102 | 90.231 | 0.00 | 0.00 |
| ATOM | 8325 | 2HG2 | THR | 559 | 48.960 | 68.298 | 91.442 | 0.00 | 0.00 |
| ATOM | 8326 | 3HG2 | THR | 559 | 47.501 | 67.520 | 90.721 | 0.00 | 0.00 |
| ATOM | 8327 | OG1  | THR | 559 | 48.242 | 68.513 | 88.128 | 0.00 | 0.00 |
| ATOM | 8328 | HG1  | THR | 559 | 48.886 | 68.879 | 87.518 | 0.00 | 0.00 |
| ATOM | 8329 | C    | THR | 559 | 47.656 | 71.478 | 89.008 | 0.00 | 0.00 |
| ATOM | 8330 | O    | THR | 559 | 47.056 | 71.842 | 87.983 | 0.00 | 0.00 |
| ATOM | 8331 | N    | SER | 560 | 48.584 | 72.241 | 89.553 | 0.00 | 0.00 |
| ATOM | 8332 | H    | SER | 560 | 49.058 | 71.937 | 90.392 | 0.00 | 0.00 |
| ATOM | 8333 | CA   | SER | 560 | 49.157 | 73.405 | 88.941 | 0.00 | 0.00 |
| ATOM | 8334 | HA   | SER | 560 | 49.310 | 73.243 | 87.874 | 0.00 | 0.00 |
| ATOM | 8335 | CB   | SER | 560 | 48.330 | 74.647 | 89.200 | 0.00 | 0.00 |
| ATOM | 8336 | HB2  | SER | 560 | 48.427 | 75.251 | 88.299 | 0.00 | 0.00 |
| ATOM | 8337 | HB3  | SER | 560 | 47.308 | 74.271 | 89.247 | 0.00 | 0.00 |
| ATOM | 8338 | OG   | SER | 560 | 48.678 | 75.521 | 90.314 | 0.00 | 0.00 |
| ATOM | 8339 | HG   | SER | 560 | 48.786 | 74.946 | 91.075 | 0.00 | 0.00 |
| ATOM | 8340 | C    | SER | 560 | 50.646 | 73.601 | 89.449 | 0.00 | 0.00 |
| ATOM | 8341 | O    | SER | 560 | 50.933 | 73.456 | 90.577 | 0.00 | 0.00 |
| ATOM | 8342 | N    | SER | 561 | 51.606 | 73.911 | 88.556 | 0.00 | 0.00 |
| ATOM | 8343 | H    | SER | 561 | 51.305 | 74.100 | 87.611 | 0.00 | 0.00 |
| ATOM | 8344 | CA   | SER | 561 | 53.084 | 73.658 | 88.738 | 0.00 | 0.00 |
| ATOM | 8345 | HA   | SER | 561 | 53.235 | 72.738 | 89.303 | 0.00 | 0.00 |

|      |      |     |     |     |        |        |        |      |      |
|------|------|-----|-----|-----|--------|--------|--------|------|------|
| ATOM | 8346 | CB  | SER | 561 | 53.675 | 73.480 | 87.356 | 0.00 | 0.00 |
| ATOM | 8347 | HB2 | SER | 561 | 54.653 | 73.016 | 87.487 | 0.00 | 0.00 |
| ATOM | 8348 | HB3 | SER | 561 | 53.110 | 72.704 | 86.839 | 0.00 | 0.00 |
| ATOM | 8349 | OG  | SER | 561 | 53.711 | 74.645 | 86.492 | 0.00 | 0.00 |
| ATOM | 8350 | HG  | SER | 561 | 52.870 | 74.593 | 86.032 | 0.00 | 0.00 |
| ATOM | 8351 | C   | SER | 561 | 53.842 | 74.683 | 89.456 | 0.00 | 0.00 |
| ATOM | 8352 | O   | SER | 561 | 54.807 | 74.421 | 90.199 | 0.00 | 0.00 |
| ATOM | 8353 | N   | A21 | 562 | 53.479 | 75.941 | 89.330 | 0.00 | 0.00 |
| ATOM | 8354 | H   | A21 | 562 | 52.709 | 76.181 | 88.722 | 0.00 | 0.00 |
| ATOM | 8355 | CA  | A21 | 562 | 54.194 | 77.115 | 89.800 | 0.00 | 0.00 |
| ATOM | 8356 | HA  | A21 | 562 | 53.711 | 78.014 | 89.416 | 0.00 | 0.00 |
| ATOM | 8357 | CB  | A21 | 562 | 53.942 | 77.141 | 91.322 | 0.00 | 0.00 |
| ATOM | 8358 | HB2 | A21 | 562 | 53.182 | 76.426 | 91.638 | 0.00 | 0.00 |
| ATOM | 8359 | HB3 | A21 | 562 | 54.894 | 76.835 | 91.755 | 0.00 | 0.00 |
| ATOM | 8360 | CG  | A21 | 562 | 53.704 | 78.519 | 91.920 | 0.00 | 0.00 |
| ATOM | 8361 | OD1 | A21 | 562 | 54.316 | 79.521 | 91.558 | 0.00 | 0.00 |
| ATOM | 8362 | OD2 | A21 | 562 | 52.854 | 78.633 | 92.845 | 0.00 | 0.00 |
| ATOM | 8363 | C   | A21 | 562 | 55.725 | 77.094 | 89.442 | 0.00 | 0.00 |
| ATOM | 8364 | O   | A21 | 562 | 56.619 | 77.465 | 90.185 | 0.00 | 0.00 |
| ATOM | 8365 | N   | SER | 563 | 56.015 | 76.652 | 88.166 | 0.00 | 0.00 |
| ATOM | 8366 | H   | SER | 563 | 55.216 | 76.681 | 87.549 | 0.00 | 0.00 |
| ATOM | 8367 | CA  | SER | 563 | 57.352 | 76.161 | 87.709 | 0.00 | 0.00 |
| ATOM | 8368 | HA  | SER | 563 | 57.669 | 75.259 | 88.233 | 0.00 | 0.00 |
| ATOM | 8369 | CB  | SER | 563 | 57.174 | 75.793 | 86.261 | 0.00 | 0.00 |
| ATOM | 8370 | HB2 | SER | 563 | 56.457 | 76.439 | 85.755 | 0.00 | 0.00 |
| ATOM | 8371 | HB3 | SER | 563 | 58.179 | 75.925 | 85.860 | 0.00 | 0.00 |

|      |      |      |     |     |        |        |        |      |      |
|------|------|------|-----|-----|--------|--------|--------|------|------|
| ATOM | 8372 | OG   | SER | 563 | 56.742 | 74.498 | 86.082 | 0.00 | 0.00 |
| ATOM | 8373 | HG   | SER | 563 | 55.782 | 74.509 | 86.074 | 0.00 | 0.00 |
| ATOM | 8374 | C    | SER | 563 | 58.530 | 77.157 | 87.911 | 0.00 | 0.00 |
| ATOM | 8375 | O    | SER | 563 | 58.634 | 78.196 | 87.191 | 0.00 | 0.00 |
| ATOM | 8376 | N    | GLN | 564 | 59.529 | 76.731 | 88.749 | 0.00 | 0.00 |
| ATOM | 8377 | H    | GLN | 564 | 59.395 | 75.870 | 89.258 | 0.00 | 0.00 |
| ATOM | 8378 | CA   | GLN | 564 | 60.755 | 77.524 | 89.009 | 0.00 | 0.00 |
| ATOM | 8379 | HA   | GLN | 564 | 61.425 | 77.054 | 89.728 | 0.00 | 0.00 |
| ATOM | 8380 | CB   | GLN | 564 | 61.553 | 77.571 | 87.631 | 0.00 | 0.00 |
| ATOM | 8381 | HB2  | GLN | 564 | 61.415 | 76.630 | 87.099 | 0.00 | 0.00 |
| ATOM | 8382 | HB3  | GLN | 564 | 61.326 | 78.438 | 87.009 | 0.00 | 0.00 |
| ATOM | 8383 | CG   | GLN | 564 | 63.078 | 77.750 | 87.909 | 0.00 | 0.00 |
| ATOM | 8384 | HG2  | GLN | 564 | 63.279 | 78.801 | 87.700 | 0.00 | 0.00 |
| ATOM | 8385 | HG3  | GLN | 564 | 63.269 | 77.596 | 88.971 | 0.00 | 0.00 |
| ATOM | 8386 | CD   | GLN | 564 | 63.996 | 76.835 | 87.058 | 0.00 | 0.00 |
| ATOM | 8387 | OE1  | GLN | 564 | 64.480 | 77.121 | 85.958 | 0.00 | 0.00 |
| ATOM | 8388 | NE2  | GLN | 564 | 64.114 | 75.611 | 87.473 | 0.00 | 0.00 |
| ATOM | 8389 | 1HE2 | GLN | 564 | 64.366 | 74.893 | 86.810 | 0.00 | 0.00 |
| ATOM | 8390 | 2HE2 | GLN | 564 | 63.774 | 75.364 | 88.391 | 0.00 | 0.00 |
| ATOM | 8391 | C    | GLN | 564 | 60.468 | 78.905 | 89.629 | 0.00 | 0.00 |
| ATOM | 8392 | O    | GLN | 564 | 61.363 | 79.761 | 89.816 | 0.00 | 0.00 |
| ATOM | 8393 | N    | ALA | 565 | 59.203 | 79.219 | 90.058 | 0.00 | 0.00 |
| ATOM | 8394 | H    | ALA | 565 | 58.458 | 78.538 | 90.095 | 0.00 | 0.00 |
| ATOM | 8395 | CA   | ALA | 565 | 58.969 | 80.305 | 91.048 | 0.00 | 0.00 |
| ATOM | 8396 | HA   | ALA | 565 | 59.799 | 81.008 | 91.121 | 0.00 | 0.00 |
| ATOM | 8397 | CB   | ALA | 565 | 57.873 | 81.172 | 90.510 | 0.00 | 0.00 |

ATOM 8398 HB1 ALA 565 57.047 80.474 90.380 0.00 0.00  
ATOM 8399 HB2 ALA 565 57.685 82.006 91.187 0.00 0.00  
ATOM 8400 HB3 ALA 565 58.073 81.528 89.499 0.00 0.00  
ATOM 8401 C ALA 565 58.606 79.881 92.457 0.00 0.00  
ATOM 8402 O ALA 565 59.135 80.420 93.444 0.00 0.00  
ATOM 8403 N MET 566 57.805 78.819 92.492 0.00 0.00  
ATOM 8404 H MET 566 57.640 78.244 91.679 0.00 0.00  
ATOM 8405 CA MET 566 57.432 78.176 93.777 0.00 0.00  
ATOM 8406 HA MET 566 58.263 78.273 94.475 0.00 0.00  
ATOM 8407 CB MET 566 56.181 78.844 94.286 0.00 0.00  
ATOM 8408 HB2 MET 566 56.323 79.917 94.156 0.00 0.00  
ATOM 8409 HB3 MET 566 55.310 78.421 93.786 0.00 0.00  
ATOM 8410 CG MET 566 55.954 78.504 95.812 0.00 0.00  
ATOM 8411 HG2 MET 566 55.229 77.691 95.798 0.00 0.00  
ATOM 8412 HG3 MET 566 56.907 78.161 96.217 0.00 0.00  
ATOM 8413 SD MET 566 55.279 79.815 96.811 0.00 0.00  
ATOM 8414 CE MET 566 55.341 78.974 98.431 0.00 0.00  
ATOM 8415 HE1 MET 566 55.064 79.695 99.200 0.00 0.00  
ATOM 8416 HE2 MET 566 54.697 78.105 98.292 0.00 0.00  
ATOM 8417 HE3 MET 566 56.310 78.611 98.773 0.00 0.00  
ATOM 8418 C MET 566 57.172 76.655 93.564 0.00 0.00  
ATOM 8419 O MET 566 56.190 76.058 94.088 0.00 0.00  
TER 0 0  
ATOM 8420 N GLY 567 57.811 75.960 92.635 0.00 0.00  
ATOM 8421 H GLY 567 58.549 76.340 92.060 0.00 0.00  
ATOM 8422 CA GLY 567 57.620 74.516 92.420 0.00 0.00

|      |      |      |     |     |        |        |        |      |      |
|------|------|------|-----|-----|--------|--------|--------|------|------|
| ATOM | 8423 | HA2  | GLY | 567 | 57.696 | 74.012 | 93.384 | 0.00 | 0.00 |
| ATOM | 8424 | HA3  | GLY | 567 | 56.633 | 74.306 | 92.008 | 0.00 | 0.00 |
| ATOM | 8425 | C    | GLY | 567 | 58.453 | 73.823 | 91.339 | 0.00 | 0.00 |
| ATOM | 8426 | O    | GLY | 567 | 58.744 | 74.499 | 90.311 | 0.00 | 0.00 |
| ATOM | 8427 | N    | ARG | 568 | 58.960 | 72.664 | 91.677 | 0.00 | 0.00 |
| ATOM | 8428 | H    | ARG | 568 | 58.809 | 72.232 | 92.578 | 0.00 | 0.00 |
| ATOM | 8429 | CA   | ARG | 568 | 60.124 | 72.024 | 91.029 | 0.00 | 0.00 |
| ATOM | 8430 | HA   | ARG | 568 | 60.859 | 72.731 | 90.644 | 0.00 | 0.00 |
| ATOM | 8431 | CB   | ARG | 568 | 60.804 | 70.952 | 91.859 | 0.00 | 0.00 |
| ATOM | 8432 | HB2  | ARG | 568 | 61.524 | 70.340 | 91.315 | 0.00 | 0.00 |
| ATOM | 8433 | HB3  | ARG | 568 | 61.383 | 71.494 | 92.607 | 0.00 | 0.00 |
| ATOM | 8434 | CG   | ARG | 568 | 59.827 | 70.088 | 92.725 | 0.00 | 0.00 |
| ATOM | 8435 | HG2  | ARG | 568 | 59.070 | 70.647 | 93.275 | 0.00 | 0.00 |
| ATOM | 8436 | HG3  | ARG | 568 | 59.289 | 69.376 | 92.099 | 0.00 | 0.00 |
| ATOM | 8437 | CD   | ARG | 568 | 60.695 | 69.351 | 93.751 | 0.00 | 0.00 |
| ATOM | 8438 | HD2  | ARG | 568 | 60.115 | 68.713 | 94.418 | 0.00 | 0.00 |
| ATOM | 8439 | HD3  | ARG | 568 | 61.287 | 68.599 | 93.230 | 0.00 | 0.00 |
| ATOM | 8440 | NE   | ARG | 568 | 61.596 | 70.180 | 94.590 | 0.00 | 0.00 |
| ATOM | 8441 | HE   | ARG | 568 | 62.502 | 70.471 | 94.250 | 0.00 | 0.00 |
| ATOM | 8442 | CZ   | ARG | 568 | 61.275 | 70.715 | 95.766 | 0.00 | 0.00 |
| ATOM | 8443 | NH1  | ARG | 568 | 60.149 | 70.496 | 96.316 | 0.00 | 0.00 |
| ATOM | 8444 | 1HH1 | ARG | 568 | 59.975 | 70.958 | 97.197 | 0.00 | 0.00 |
| ATOM | 8445 | 2HH1 | ARG | 568 | 59.322 | 70.085 | 95.906 | 0.00 | 0.00 |
| ATOM | 8446 | NH2  | ARG | 568 | 62.138 | 71.379 | 96.417 | 0.00 | 0.00 |
| ATOM | 8447 | 1HH2 | ARG | 568 | 61.839 | 71.724 | 97.318 | 0.00 | 0.00 |
| ATOM | 8448 | 2HH2 | ARG | 568 | 63.050 | 71.591 | 96.039 | 0.00 | 0.00 |



|      |      |      |     |     |        |        |        |      |      |
|------|------|------|-----|-----|--------|--------|--------|------|------|
| ATOM | 8449 | C    | ARG | 568 | 59.586 | 71.335 | 89.785 | 0.00 | 0.00 |
| ATOM | 8450 | O    | ARG | 568 | 58.821 | 70.324 | 89.836 | 0.00 | 0.00 |
| ATOM | 8451 | N    | VAL | 569 | 60.104 | 71.895 | 88.661 | 0.00 | 0.00 |
| ATOM | 8452 | H    | VAL | 569 | 60.551 | 72.793 | 88.779 | 0.00 | 0.00 |
| ATOM | 8453 | CA   | VAL | 569 | 59.802 | 71.579 | 87.209 | 0.00 | 0.00 |
| ATOM | 8454 | HA   | VAL | 569 | 58.735 | 71.773 | 87.095 | 0.00 | 0.00 |
| ATOM | 8455 | CB   | VAL | 569 | 60.666 | 72.464 | 86.232 | 0.00 | 0.00 |
| ATOM | 8456 | HB   | VAL | 569 | 61.695 | 72.235 | 86.510 | 0.00 | 0.00 |
| ATOM | 8457 | CG1  | VAL | 569 | 60.379 | 72.012 | 84.821 | 0.00 | 0.00 |
| ATOM | 8458 | 1HG1 | VAL | 569 | 59.305 | 71.828 | 84.800 | 0.00 | 0.00 |
| ATOM | 8459 | 2HG1 | VAL | 569 | 60.676 | 72.770 | 84.096 | 0.00 | 0.00 |
| ATOM | 8460 | 3HG1 | VAL | 569 | 60.948 | 71.104 | 84.620 | 0.00 | 0.00 |
| ATOM | 8461 | CG2  | VAL | 569 | 60.372 | 73.986 | 86.304 | 0.00 | 0.00 |
| ATOM | 8462 | 1HG2 | VAL | 569 | 61.326 | 74.469 | 86.094 | 0.00 | 0.00 |
| ATOM | 8463 | 2HG2 | VAL | 569 | 59.587 | 74.282 | 85.607 | 0.00 | 0.00 |
| ATOM | 8464 | 3HG2 | VAL | 569 | 59.970 | 74.226 | 87.288 | 0.00 | 0.00 |
| ATOM | 8465 | C    | VAL | 569 | 60.116 | 70.103 | 87.107 | 0.00 | 0.00 |
| ATOM | 8466 | O    | VAL | 569 | 59.383 | 69.360 | 86.452 | 0.00 | 0.00 |
| ATOM | 8467 | N    | GLY | 570 | 61.237 | 69.661 | 87.725 | 0.00 | 0.00 |
| ATOM | 8468 | H    | GLY | 570 | 61.841 | 70.320 | 88.195 | 0.00 | 0.00 |
| ATOM | 8469 | CA   | GLY | 570 | 61.813 | 68.375 | 87.592 | 0.00 | 0.00 |
| ATOM | 8470 | HA2  | GLY | 570 | 62.087 | 68.127 | 86.566 | 0.00 | 0.00 |
| ATOM | 8471 | HA3  | GLY | 570 | 62.731 | 68.377 | 88.179 | 0.00 | 0.00 |
| ATOM | 8472 | C    | GLY | 570 | 60.941 | 67.182 | 88.086 | 0.00 | 0.00 |
| ATOM | 8473 | O    | GLY | 570 | 61.303 | 66.027 | 87.824 | 0.00 | 0.00 |
| ATOM | 8474 | N    | GLU | 571 | 59.910 | 67.495 | 88.879 | 0.00 | 0.00 |

|      |      |      |     |     |        |        |        |      |      |
|------|------|------|-----|-----|--------|--------|--------|------|------|
| ATOM | 8475 | H    | GLU | 571 | 59.638 | 68.463 | 88.976 | 0.00 | 0.00 |
| ATOM | 8476 | CA   | GLU | 571 | 59.171 | 66.462 | 89.638 | 0.00 | 0.00 |
| ATOM | 8477 | HA   | GLU | 571 | 59.298 | 65.498 | 89.145 | 0.00 | 0.00 |
| ATOM | 8478 | CB   | GLU | 571 | 59.697 | 66.427 | 91.118 | 0.00 | 0.00 |
| ATOM | 8479 | HB2  | GLU | 571 | 59.233 | 67.124 | 91.815 | 0.00 | 0.00 |
| ATOM | 8480 | HB3  | GLU | 571 | 59.471 | 65.418 | 91.463 | 0.00 | 0.00 |
| ATOM | 8481 | CG   | GLU | 571 | 61.215 | 66.471 | 91.265 | 0.00 | 0.00 |
| ATOM | 8482 | HG2  | GLU | 571 | 61.782 | 65.941 | 90.500 | 0.00 | 0.00 |
| ATOM | 8483 | HG3  | GLU | 571 | 61.465 | 67.532 | 91.243 | 0.00 | 0.00 |
| ATOM | 8484 | CD   | GLU | 571 | 61.620 | 65.886 | 92.613 | 0.00 | 0.00 |
| ATOM | 8485 | OE1  | GLU | 571 | 62.661 | 65.246 | 92.636 | 0.00 | 0.00 |
| ATOM | 8486 | OE2  | GLU | 571 | 61.014 | 66.209 | 93.687 | 0.00 | 0.00 |
| ATOM | 8487 | C    | GLU | 571 | 57.636 | 66.800 | 89.722 | 0.00 | 0.00 |
| ATOM | 8488 | O    | GLU | 571 | 56.954 | 66.276 | 90.635 | 0.00 | 0.00 |
| ATOM | 8489 | N    | VAL | 572 | 57.154 | 67.702 | 88.855 | 0.00 | 0.00 |
| ATOM | 8490 | H    | VAL | 572 | 57.837 | 68.208 | 88.310 | 0.00 | 0.00 |
| ATOM | 8491 | CA   | VAL | 572 | 55.726 | 68.006 | 88.761 | 0.00 | 0.00 |
| ATOM | 8492 | HA   | VAL | 572 | 55.452 | 68.438 | 89.724 | 0.00 | 0.00 |
| ATOM | 8493 | CB   | VAL | 572 | 55.339 | 69.080 | 87.646 | 0.00 | 0.00 |
| ATOM | 8494 | HB   | VAL | 572 | 54.252 | 69.158 | 87.626 | 0.00 | 0.00 |
| ATOM | 8495 | CG1  | VAL | 572 | 55.950 | 70.411 | 87.930 | 0.00 | 0.00 |
| ATOM | 8496 | 1HG1 | VAL | 572 | 57.009 | 70.250 | 88.130 | 0.00 | 0.00 |
| ATOM | 8497 | 2HG1 | VAL | 572 | 55.703 | 71.048 | 87.081 | 0.00 | 0.00 |
| ATOM | 8498 | 3HG1 | VAL | 572 | 55.501 | 70.683 | 88.885 | 0.00 | 0.00 |
| ATOM | 8499 | CG2  | VAL | 572 | 55.872 | 68.619 | 86.321 | 0.00 | 0.00 |
| ATOM | 8500 | 1HG2 | VAL | 572 | 55.168 | 67.895 | 85.912 | 0.00 | 0.00 |

|      |      |      |     |     |        |        |        |      |      |
|------|------|------|-----|-----|--------|--------|--------|------|------|
| ATOM | 8501 | 2HG2 | VAL | 572 | 56.049 | 69.474 | 85.668 | 0.00 | 0.00 |
| ATOM | 8502 | 3HG2 | VAL | 572 | 56.859 | 68.163 | 86.407 | 0.00 | 0.00 |
| ATOM | 8503 | C    | VAL | 572 | 54.721 | 66.803 | 88.636 | 0.00 | 0.00 |
| ATOM | 8504 | O    | VAL | 572 | 53.739 | 66.751 | 89.416 | 0.00 | 0.00 |
| ATOM | 8505 | N    | ILE | 573 | 55.060 | 65.804 | 87.851 | 0.00 | 0.00 |
| ATOM | 8506 | H    | ILE | 573 | 55.955 | 65.959 | 87.411 | 0.00 | 0.00 |
| ATOM | 8507 | CA   | ILE | 573 | 54.281 | 64.594 | 87.658 | 0.00 | 0.00 |
| ATOM | 8508 | HA   | ILE | 573 | 53.223 | 64.759 | 87.861 | 0.00 | 0.00 |
| ATOM | 8509 | CB   | ILE | 573 | 54.304 | 64.094 | 86.132 | 0.00 | 0.00 |
| ATOM | 8510 | HB   | ILE | 573 | 55.331 | 63.863 | 85.849 | 0.00 | 0.00 |
| ATOM | 8511 | CG2  | ILE | 573 | 53.518 | 62.824 | 86.062 | 0.00 | 0.00 |
| ATOM | 8512 | 1HG2 | ILE | 573 | 54.031 | 62.143 | 86.742 | 0.00 | 0.00 |
| ATOM | 8513 | 2HG2 | ILE | 573 | 52.448 | 62.922 | 86.243 | 0.00 | 0.00 |
| ATOM | 8514 | 3HG2 | ILE | 573 | 53.503 | 62.368 | 85.072 | 0.00 | 0.00 |
| ATOM | 8515 | CG1  | ILE | 573 | 53.699 | 65.145 | 85.145 | 0.00 | 0.00 |
| ATOM | 8516 | 2HG1 | ILE | 573 | 54.509 | 65.830 | 84.893 | 0.00 | 0.00 |
| ATOM | 8517 | 3HG1 | ILE | 573 | 53.382 | 64.627 | 84.239 | 0.00 | 0.00 |
| ATOM | 8518 | CD1  | ILE | 573 | 52.597 | 66.011 | 85.622 | 0.00 | 0.00 |
| ATOM | 8519 | 1HD1 | ILE | 573 | 52.232 | 66.481 | 84.709 | 0.00 | 0.00 |
| ATOM | 8520 | 2HD1 | ILE | 573 | 51.803 | 65.350 | 85.969 | 0.00 | 0.00 |
| ATOM | 8521 | 3HD1 | ILE | 573 | 52.825 | 66.710 | 86.427 | 0.00 | 0.00 |
| ATOM | 8522 | C    | ILE | 573 | 54.621 | 63.481 | 88.640 | 0.00 | 0.00 |
| ATOM | 8523 | O    | ILE | 573 | 53.780 | 62.739 | 89.186 | 0.00 | 0.00 |
| ATOM | 8524 | N    | LEU | 574 | 55.886 | 63.454 | 89.045 | 0.00 | 0.00 |
| ATOM | 8525 | H    | LEU | 574 | 56.411 | 64.267 | 88.755 | 0.00 | 0.00 |
| ATOM | 8526 | CA   | LEU | 574 | 56.454 | 62.466 | 90.044 | 0.00 | 0.00 |

|      |      |      |     |     |        |        |        |      |      |
|------|------|------|-----|-----|--------|--------|--------|------|------|
| ATOM | 8527 | HA   | LEU | 574 | 56.286 | 61.459 | 89.661 | 0.00 | 0.00 |
| ATOM | 8528 | CB   | LEU | 574 | 57.894 | 62.796 | 90.113 | 0.00 | 0.00 |
| ATOM | 8529 | HB2  | LEU | 574 | 58.209 | 62.811 | 89.069 | 0.00 | 0.00 |
| ATOM | 8530 | HB3  | LEU | 574 | 57.934 | 63.866 | 90.318 | 0.00 | 0.00 |
| ATOM | 8531 | CG   | LEU | 574 | 58.862 | 61.920 | 90.937 | 0.00 | 0.00 |
| ATOM | 8532 | HG   | LEU | 574 | 58.640 | 60.857 | 90.838 | 0.00 | 0.00 |
| ATOM | 8533 | CD1  | LEU | 574 | 60.290 | 62.168 | 90.465 | 0.00 | 0.00 |
| ATOM | 8534 | 1HD1 | LEU | 574 | 60.349 | 61.813 | 89.436 | 0.00 | 0.00 |
| ATOM | 8535 | 2HD1 | LEU | 574 | 60.492 | 63.236 | 90.386 | 0.00 | 0.00 |
| ATOM | 8536 | 3HD1 | LEU | 574 | 61.070 | 61.642 | 91.017 | 0.00 | 0.00 |
| ATOM | 8537 | CD2  | LEU | 574 | 58.681 | 62.139 | 92.436 | 0.00 | 0.00 |
| ATOM | 8538 | 1HD2 | LEU | 574 | 59.449 | 61.623 | 93.012 | 0.00 | 0.00 |
| ATOM | 8539 | 2HD2 | LEU | 574 | 58.640 | 63.209 | 92.639 | 0.00 | 0.00 |
| ATOM | 8540 | 3HD2 | LEU | 574 | 57.717 | 61.740 | 92.753 | 0.00 | 0.00 |
| ATOM | 8541 | C    | LEU | 574 | 55.716 | 62.747 | 91.357 | 0.00 | 0.00 |
| ATOM | 8542 | O    | LEU | 574 | 54.934 | 61.894 | 91.815 | 0.00 | 0.00 |
| ATOM | 8543 | N    | ARG | 575 | 55.645 | 64.040 | 91.810 | 0.00 | 0.00 |
| ATOM | 8544 | H    | ARG | 575 | 56.096 | 64.801 | 91.322 | 0.00 | 0.00 |
| ATOM | 8545 | CA   | ARG | 575 | 55.001 | 64.408 | 93.076 | 0.00 | 0.00 |
| ATOM | 8546 | HA   | ARG | 575 | 55.404 | 63.707 | 93.806 | 0.00 | 0.00 |
| ATOM | 8547 | CB   | ARG | 575 | 55.256 | 65.849 | 93.600 | 0.00 | 0.00 |
| ATOM | 8548 | HB2  | ARG | 575 | 54.985 | 66.525 | 92.790 | 0.00 | 0.00 |
| ATOM | 8549 | HB3  | ARG | 575 | 54.584 | 65.982 | 94.449 | 0.00 | 0.00 |
| ATOM | 8550 | CG   | ARG | 575 | 56.698 | 66.199 | 94.056 | 0.00 | 0.00 |
| ATOM | 8551 | HG2  | ARG | 575 | 57.256 | 66.301 | 93.126 | 0.00 | 0.00 |
| ATOM | 8552 | HG3  | ARG | 575 | 56.823 | 67.155 | 94.566 | 0.00 | 0.00 |

|      |      |      |     |     |        |        |        |      |      |
|------|------|------|-----|-----|--------|--------|--------|------|------|
| ATOM | 8553 | CD   | ARG | 575 | 57.432 | 65.122 | 94.898 | 0.00 | 0.00 |
| ATOM | 8554 | HD2  | ARG | 575 | 56.862 | 64.956 | 95.813 | 0.00 | 0.00 |
| ATOM | 8555 | HD3  | ARG | 575 | 57.444 | 64.186 | 94.340 | 0.00 | 0.00 |
| ATOM | 8556 | NE   | ARG | 575 | 58.886 | 65.475 | 95.307 | 0.00 | 0.00 |
| ATOM | 8557 | HE   | ARG | 575 | 59.477 | 65.866 | 94.587 | 0.00 | 0.00 |
| ATOM | 8558 | CZ   | ARG | 575 | 59.433 | 65.359 | 96.515 | 0.00 | 0.00 |
| ATOM | 8559 | NH1  | ARG | 575 | 58.956 | 64.623 | 97.426 | 0.00 | 0.00 |
| ATOM | 8560 | 1HH1 | ARG | 575 | 59.593 | 64.342 | 98.157 | 0.00 | 0.00 |
| ATOM | 8561 | 2HH1 | ARG | 575 | 58.290 | 63.903 | 97.184 | 0.00 | 0.00 |
| ATOM | 8562 | NH2  | ARG | 575 | 60.568 | 65.920 | 96.789 | 0.00 | 0.00 |
| ATOM | 8563 | 1HH2 | ARG | 575 | 61.046 | 65.734 | 97.659 | 0.00 | 0.00 |
| ATOM | 8564 | 2HH2 | ARG | 575 | 61.103 | 66.535 | 96.192 | 0.00 | 0.00 |
| ATOM | 8565 | C    | ARG | 575 | 53.486 | 64.173 | 93.113 | 0.00 | 0.00 |
| ATOM | 8566 | O    | ARG | 575 | 52.986 | 63.849 | 94.187 | 0.00 | 0.00 |
| ATOM | 8567 | N    | THR | 576 | 52.768 | 64.273 | 91.947 | 0.00 | 0.00 |
| ATOM | 8568 | H    | THR | 576 | 53.274 | 64.543 | 91.115 | 0.00 | 0.00 |
| ATOM | 8569 | CA   | THR | 576 | 51.394 | 63.909 | 91.726 | 0.00 | 0.00 |
| ATOM | 8570 | HA   | THR | 576 | 50.722 | 64.439 | 92.402 | 0.00 | 0.00 |
| ATOM | 8571 | CB   | THR | 576 | 50.997 | 64.215 | 90.304 | 0.00 | 0.00 |
| ATOM | 8572 | HB   | THR | 576 | 51.439 | 63.576 | 89.540 | 0.00 | 0.00 |
| ATOM | 8573 | CG2  | THR | 576 | 49.437 | 64.223 | 90.196 | 0.00 | 0.00 |
| ATOM | 8574 | 1HG2 | THR | 576 | 48.922 | 64.707 | 91.026 | 0.00 | 0.00 |
| ATOM | 8575 | 2HG2 | THR | 576 | 49.298 | 64.625 | 89.192 | 0.00 | 0.00 |
| ATOM | 8576 | 3HG2 | THR | 576 | 49.105 | 63.188 | 90.281 | 0.00 | 0.00 |
| ATOM | 8577 | OG1  | THR | 576 | 51.354 | 65.551 | 89.939 | 0.00 | 0.00 |
| ATOM | 8578 | HG1  | THR | 576 | 52.270 | 65.712 | 90.178 | 0.00 | 0.00 |

|      |      |     |     |     |        |        |        |      |      |
|------|------|-----|-----|-----|--------|--------|--------|------|------|
| ATOM | 8579 | C   | THR | 576 | 51.225 | 62.447 | 91.970 | 0.00 | 0.00 |
| ATOM | 8580 | O   | THR | 576 | 50.316 | 62.087 | 92.668 | 0.00 | 0.00 |
| ATOM | 8581 | N   | TRP | 577 | 52.064 | 61.492 | 91.568 | 0.00 | 0.00 |
| ATOM | 8582 | H   | TRP | 577 | 52.709 | 61.797 | 90.852 | 0.00 | 0.00 |
| ATOM | 8583 | CA  | TRP | 577 | 51.856 | 60.017 | 91.767 | 0.00 | 0.00 |
| ATOM | 8584 | HA  | TRP | 577 | 50.780 | 59.864 | 91.842 | 0.00 | 0.00 |
| ATOM | 8585 | CB  | TRP | 577 | 52.517 | 59.370 | 90.544 | 0.00 | 0.00 |
| ATOM | 8586 | HB2 | TRP | 577 | 53.387 | 60.008 | 90.390 | 0.00 | 0.00 |
| ATOM | 8587 | HB3 | TRP | 577 | 52.811 | 58.338 | 90.737 | 0.00 | 0.00 |
| ATOM | 8588 | CG  | TRP | 577 | 51.627 | 59.431 | 89.375 | 0.00 | 0.00 |
| ATOM | 8589 | CD1 | TRP | 577 | 51.940 | 60.032 | 88.223 | 0.00 | 0.00 |
| ATOM | 8590 | HD1 | TRP | 577 | 52.861 | 60.538 | 87.975 | 0.00 | 0.00 |
| ATOM | 8591 | NE1 | TRP | 577 | 50.837 | 59.909 | 87.422 | 0.00 | 0.00 |
| ATOM | 8592 | HE1 | TRP | 577 | 50.779 | 60.437 | 86.563 | 0.00 | 0.00 |
| ATOM | 8593 | CE2 | TRP | 577 | 49.771 | 59.292 | 88.022 | 0.00 | 0.00 |
| ATOM | 8594 | CZ2 | TRP | 577 | 48.484 | 59.055 | 87.553 | 0.00 | 0.00 |
| ATOM | 8595 | HZ2 | TRP | 577 | 48.120 | 59.413 | 86.602 | 0.00 | 0.00 |
| ATOM | 8596 | CH2 | TRP | 577 | 47.665 | 58.324 | 88.457 | 0.00 | 0.00 |
| ATOM | 8597 | HH2 | TRP | 577 | 46.654 | 58.115 | 88.140 | 0.00 | 0.00 |
| ATOM | 8598 | CZ3 | TRP | 577 | 48.114 | 57.877 | 89.724 | 0.00 | 0.00 |
| ATOM | 8599 | HZ3 | TRP | 577 | 47.427 | 57.243 | 90.265 | 0.00 | 0.00 |
| ATOM | 8600 | CE3 | TRP | 577 | 49.402 | 58.256 | 90.172 | 0.00 | 0.00 |
| ATOM | 8601 | HE3 | TRP | 577 | 49.839 | 57.948 | 91.110 | 0.00 | 0.00 |
| ATOM | 8602 | CD2 | TRP | 577 | 50.243 | 59.001 | 89.310 | 0.00 | 0.00 |
| ATOM | 8603 | C   | TRP | 577 | 52.292 | 59.605 | 93.143 | 0.00 | 0.00 |
| ATOM | 8604 | O   | TRP | 577 | 51.627 | 58.776 | 93.764 | 0.00 | 0.00 |

|      |      |      |     |     |        |        |        |      |      |
|------|------|------|-----|-----|--------|--------|--------|------|------|
| ATOM | 8605 | N    | GLN | 578 | 53.294 | 60.304 | 93.774 | 0.00 | 0.00 |
| ATOM | 8606 | H    | GLN | 578 | 53.969 | 60.699 | 93.135 | 0.00 | 0.00 |
| ATOM | 8607 | CA   | GLN | 578 | 53.597 | 60.076 | 95.247 | 0.00 | 0.00 |
| ATOM | 8608 | HA   | GLN | 578 | 53.970 | 59.055 | 95.325 | 0.00 | 0.00 |
| ATOM | 8609 | CB   | GLN | 578 | 54.756 | 60.998 | 95.749 | 0.00 | 0.00 |
| ATOM | 8610 | HB2  | GLN | 578 | 54.603 | 62.047 | 95.497 | 0.00 | 0.00 |
| ATOM | 8611 | HB3  | GLN | 578 | 54.940 | 60.961 | 96.822 | 0.00 | 0.00 |
| ATOM | 8612 | CG   | GLN | 578 | 56.115 | 60.594 | 95.196 | 0.00 | 0.00 |
| ATOM | 8613 | HG2  | GLN | 578 | 56.313 | 59.569 | 95.509 | 0.00 | 0.00 |
| ATOM | 8614 | HG3  | GLN | 578 | 55.945 | 60.653 | 94.121 | 0.00 | 0.00 |
| ATOM | 8615 | CD   | GLN | 578 | 57.290 | 61.474 | 95.657 | 0.00 | 0.00 |
| ATOM | 8616 | OE1  | GLN | 578 | 57.154 | 62.590 | 96.081 | 0.00 | 0.00 |
| ATOM | 8617 | NE2  | GLN | 578 | 58.460 | 60.982 | 95.811 | 0.00 | 0.00 |
| ATOM | 8618 | 1HE2 | GLN | 578 | 59.140 | 61.592 | 96.242 | 0.00 | 0.00 |
| ATOM | 8619 | 2HE2 | GLN | 578 | 58.725 | 60.113 | 95.370 | 0.00 | 0.00 |
| ATOM | 8620 | C    | GLN | 578 | 52.358 | 60.274 | 96.195 | 0.00 | 0.00 |
| ATOM | 8621 | O    | GLN | 578 | 52.175 | 59.384 | 97.048 | 0.00 | 0.00 |
| ATOM | 8622 | N    | VAL | 579 | 51.609 | 61.374 | 95.925 | 0.00 | 0.00 |
| ATOM | 8623 | H    | VAL | 579 | 51.946 | 61.981 | 95.192 | 0.00 | 0.00 |
| ATOM | 8624 | CA   | VAL | 579 | 50.354 | 61.593 | 96.608 | 0.00 | 0.00 |
| ATOM | 8625 | HA   | VAL | 579 | 50.424 | 61.659 | 97.693 | 0.00 | 0.00 |
| ATOM | 8626 | CB   | VAL | 579 | 49.686 | 62.926 | 96.096 | 0.00 | 0.00 |
| ATOM | 8627 | HB   | VAL | 579 | 49.561 | 62.959 | 95.013 | 0.00 | 0.00 |
| ATOM | 8628 | CG1  | VAL | 579 | 48.312 | 63.248 | 96.817 | 0.00 | 0.00 |
| ATOM | 8629 | 1HG1 | VAL | 579 | 47.621 | 62.417 | 96.675 | 0.00 | 0.00 |
| ATOM | 8630 | 2HG1 | VAL | 579 | 48.429 | 63.468 | 97.878 | 0.00 | 0.00 |

|      |      |      |     |     |        |        |        |      |      |
|------|------|------|-----|-----|--------|--------|--------|------|------|
| ATOM | 8631 | 3HG1 | VAL | 579 | 47.798 | 64.091 | 96.356 | 0.00 | 0.00 |
| ATOM | 8632 | CG2  | VAL | 579 | 50.495 | 64.232 | 96.405 | 0.00 | 0.00 |
| ATOM | 8633 | 1HG2 | VAL | 579 | 51.450 | 64.269 | 95.880 | 0.00 | 0.00 |
| ATOM | 8634 | 2HG2 | VAL | 579 | 49.888 | 65.107 | 96.172 | 0.00 | 0.00 |
| ATOM | 8635 | 3HG2 | VAL | 579 | 50.648 | 64.374 | 97.474 | 0.00 | 0.00 |
| ATOM | 8636 | C    | VAL | 579 | 49.369 | 60.425 | 96.521 | 0.00 | 0.00 |
| ATOM | 8637 | O    | VAL | 579 | 48.804 | 60.000 | 97.514 | 0.00 | 0.00 |
| ATOM | 8638 | N    | ALA | 580 | 49.207 | 59.862 | 95.361 | 0.00 | 0.00 |
| ATOM | 8639 | H    | ALA | 580 | 49.716 | 60.246 | 94.578 | 0.00 | 0.00 |
| ATOM | 8640 | CA   | ALA | 580 | 48.265 | 58.744 | 95.095 | 0.00 | 0.00 |
| ATOM | 8641 | HA   | ALA | 580 | 47.248 | 59.045 | 95.347 | 0.00 | 0.00 |
| ATOM | 8642 | CB   | ALA | 580 | 48.325 | 58.467 | 93.605 | 0.00 | 0.00 |
| ATOM | 8643 | HB1  | ALA | 580 | 48.221 | 59.458 | 93.163 | 0.00 | 0.00 |
| ATOM | 8644 | HB2  | ALA | 580 | 49.280 | 58.004 | 93.355 | 0.00 | 0.00 |
| ATOM | 8645 | HB3  | ALA | 580 | 47.459 | 57.885 | 93.293 | 0.00 | 0.00 |
| ATOM | 8646 | C    | ALA | 580 | 48.661 | 57.522 | 95.950 | 0.00 | 0.00 |
| ATOM | 8647 | O    | ALA | 580 | 47.817 | 56.814 | 96.527 | 0.00 | 0.00 |
| ATOM | 8648 | N    | HIE | 581 | 49.982 | 57.038 | 95.827 | 0.00 | 0.00 |
| ATOM | 8649 | H    | HIE | 581 | 50.715 | 57.614 | 95.438 | 0.00 | 0.00 |
| ATOM | 8650 | CA   | HIE | 581 | 50.588 | 56.060 | 96.828 | 0.00 | 0.00 |
| ATOM | 8651 | HA   | HIE | 581 | 50.153 | 55.077 | 96.648 | 0.00 | 0.00 |
| ATOM | 8652 | CB   | HIE | 581 | 52.112 | 56.015 | 96.700 | 0.00 | 0.00 |
| ATOM | 8653 | HB2  | HIE | 581 | 52.517 | 55.597 | 95.777 | 0.00 | 0.00 |
| ATOM | 8654 | HB3  | HIE | 581 | 52.479 | 57.038 | 96.782 | 0.00 | 0.00 |
| ATOM | 8655 | CG   | HIE | 581 | 52.810 | 55.210 | 97.757 | 0.00 | 0.00 |
| ATOM | 8656 | ND1  | HIE | 581 | 53.290 | 53.912 | 97.606 | 0.00 | 0.00 |



|      |      |      |     |     |        |        |         |      |      |
|------|------|------|-----|-----|--------|--------|---------|------|------|
| ATOM | 8657 | CE1  | HIE | 581 | 53.883 | 53.599 | 98.771  | 0.00 | 0.00 |
| ATOM | 8658 | HE1  | HIE | 581 | 54.463 | 52.731 | 99.046  | 0.00 | 0.00 |
| ATOM | 8659 | NE2  | HIE | 581 | 53.797 | 54.653 | 99.601  | 0.00 | 0.00 |
| ATOM | 8660 | HE2  | HIE | 581 | 54.103 | 54.556 | 100.559 | 0.00 | 0.00 |
| ATOM | 8661 | CD2  | HIE | 581 | 53.047 | 55.626 | 99.005  | 0.00 | 0.00 |
| ATOM | 8662 | HD2  | HIE | 581 | 52.719 | 56.584 | 99.380  | 0.00 | 0.00 |
| ATOM | 8663 | C    | HIE | 581 | 50.173 | 56.455 | 98.259  | 0.00 | 0.00 |
| ATOM | 8664 | O    | HIE | 581 | 49.634 | 55.627 | 99.031  | 0.00 | 0.00 |
| ATOM | 8665 | N    | ARG | 582 | 50.265 | 57.705 | 98.596  | 0.00 | 0.00 |
| ATOM | 8666 | H    | ARG | 582 | 50.691 | 58.314 | 97.913  | 0.00 | 0.00 |
| ATOM | 8667 | CA   | ARG | 582 | 50.184 | 58.005 | 100.044 | 0.00 | 0.00 |
| ATOM | 8668 | HA   | ARG | 582 | 50.753 | 57.262 | 100.603 | 0.00 | 0.00 |
| ATOM | 8669 | CB   | ARG | 582 | 50.847 | 59.339 | 100.273 | 0.00 | 0.00 |
| ATOM | 8670 | HB2  | ARG | 582 | 51.908 | 59.223 | 100.052 | 0.00 | 0.00 |
| ATOM | 8671 | HB3  | ARG | 582 | 50.441 | 60.092 | 99.597  | 0.00 | 0.00 |
| ATOM | 8672 | CG   | ARG | 582 | 50.585 | 59.917 | 101.624 | 0.00 | 0.00 |
| ATOM | 8673 | HG2  | ARG | 582 | 49.578 | 60.243 | 101.884 | 0.00 | 0.00 |
| ATOM | 8674 | HG3  | ARG | 582 | 50.844 | 59.114 | 102.314 | 0.00 | 0.00 |
| ATOM | 8675 | CD   | ARG | 582 | 51.607 | 61.047 | 101.780 | 0.00 | 0.00 |
| ATOM | 8676 | HD2  | ARG | 582 | 52.517 | 60.801 | 102.327 | 0.00 | 0.00 |
| ATOM | 8677 | HD3  | ARG | 582 | 51.647 | 61.608 | 100.847 | 0.00 | 0.00 |
| ATOM | 8678 | NE   | ARG | 582 | 50.899 | 61.959 | 102.675 | 0.00 | 0.00 |
| ATOM | 8679 | HE   | ARG | 582 | 50.250 | 62.518 | 102.140 | 0.00 | 0.00 |
| ATOM | 8680 | CZ   | ARG | 582 | 50.879 | 62.044 | 103.974 | 0.00 | 0.00 |
| ATOM | 8681 | NH1  | ARG | 582 | 51.531 | 61.254 | 104.743 | 0.00 | 0.00 |
| ATOM | 8682 | 1HH1 | ARG | 582 | 51.296 | 61.210 | 105.724 | 0.00 | 0.00 |

|      |      |      |     |     |        |        |         |      |      |
|------|------|------|-----|-----|--------|--------|---------|------|------|
| ATOM | 8683 | 2HH1 | ARG | 582 | 52.152 | 60.611 | 104.273 | 0.00 | 0.00 |
| ATOM | 8684 | NH2  | ARG | 582 | 50.104 | 62.901 | 104.649 | 0.00 | 0.00 |
| ATOM | 8685 | 1HH2 | ARG | 582 | 50.000 | 62.769 | 105.645 | 0.00 | 0.00 |
| ATOM | 8686 | 2HH2 | ARG | 582 | 49.485 | 63.453 | 104.073 | 0.00 | 0.00 |
| ATOM | 8687 | C    | ARG | 582 | 48.774 | 57.834 | 100.593 | 0.00 | 0.00 |
| ATOM | 8688 | O    | ARG | 582 | 48.598 | 57.106 | 101.524 | 0.00 | 0.00 |
| ATOM | 8689 | N    | MET | 583 | 47.851 | 58.197 | 99.763  | 0.00 | 0.00 |
| ATOM | 8690 | H    | MET | 583 | 48.215 | 58.763 | 99.009  | 0.00 | 0.00 |
| ATOM | 8691 | CA   | MET | 583 | 46.472 | 58.066 | 100.125 | 0.00 | 0.00 |
| ATOM | 8692 | HA   | MET | 583 | 46.445 | 58.267 | 101.196 | 0.00 | 0.00 |
| ATOM | 8693 | CB   | MET | 583 | 45.611 | 59.165 | 99.437  | 0.00 | 0.00 |
| ATOM | 8694 | HB2  | MET | 583 | 45.758 | 59.076 | 98.361  | 0.00 | 0.00 |
| ATOM | 8695 | HB3  | MET | 583 | 44.550 | 58.973 | 99.596  | 0.00 | 0.00 |
| ATOM | 8696 | CG   | MET | 583 | 45.867 | 60.633 | 99.869  | 0.00 | 0.00 |
| ATOM | 8697 | HG2  | MET | 583 | 46.924 | 60.599 | 100.137 | 0.00 | 0.00 |
| ATOM | 8698 | HG3  | MET | 583 | 45.610 | 61.289 | 99.038  | 0.00 | 0.00 |
| ATOM | 8699 | SD   | MET | 583 | 44.860 | 61.204 | 101.280 | 0.00 | 0.00 |
| ATOM | 8700 | CE   | MET | 583 | 46.071 | 61.826 | 102.382 | 0.00 | 0.00 |
| ATOM | 8701 | HE1  | MET | 583 | 45.540 | 62.475 | 103.078 | 0.00 | 0.00 |
| ATOM | 8702 | HE2  | MET | 583 | 46.464 | 60.949 | 102.896 | 0.00 | 0.00 |
| ATOM | 8703 | HE3  | MET | 583 | 46.822 | 62.342 | 101.784 | 0.00 | 0.00 |
| ATOM | 8704 | C    | MET | 583 | 45.915 | 56.628 | 100.039 | 0.00 | 0.00 |
| ATOM | 8705 | O    | MET | 583 | 44.833 | 56.300 | 100.558 | 0.00 | 0.00 |
| ATOM | 8706 | N    | LYS | 584 | 46.683 | 55.740 | 99.341  | 0.00 | 0.00 |
| ATOM | 8707 | H    | LYS | 584 | 47.443 | 56.061 | 98.759  | 0.00 | 0.00 |
| ATOM | 8708 | CA   | LYS | 584 | 46.368 | 54.319 | 99.432  | 0.00 | 0.00 |

|      |      |     |     |     |        |        |         |      |      |
|------|------|-----|-----|-----|--------|--------|---------|------|------|
| ATOM | 8709 | HA  | LYS | 584 | 45.318 | 54.187 | 99.172  | 0.00 | 0.00 |
| ATOM | 8710 | CB  | LYS | 584 | 47.125 | 53.455 | 98.387  | 0.00 | 0.00 |
| ATOM | 8711 | HB2 | LYS | 584 | 47.178 | 53.925 | 97.405  | 0.00 | 0.00 |
| ATOM | 8712 | HB3 | LYS | 584 | 48.137 | 53.294 | 98.759  | 0.00 | 0.00 |
| ATOM | 8713 | CG  | LYS | 584 | 46.502 | 52.025 | 98.263  | 0.00 | 0.00 |
| ATOM | 8714 | HG2 | LYS | 584 | 46.455 | 51.500 | 99.217  | 0.00 | 0.00 |
| ATOM | 8715 | HG3 | LYS | 584 | 45.461 | 52.212 | 98.000  | 0.00 | 0.00 |
| ATOM | 8716 | CD  | LYS | 584 | 47.304 | 51.169 | 97.242  | 0.00 | 0.00 |
| ATOM | 8717 | HD2 | LYS | 584 | 47.254 | 51.594 | 96.240  | 0.00 | 0.00 |
| ATOM | 8718 | HD3 | LYS | 584 | 48.313 | 50.975 | 97.605  | 0.00 | 0.00 |
| ATOM | 8719 | CE  | LYS | 584 | 46.532 | 49.813 | 97.216  | 0.00 | 0.00 |
| ATOM | 8720 | HE2 | LYS | 584 | 46.546 | 49.343 | 98.199  | 0.00 | 0.00 |
| ATOM | 8721 | HE3 | LYS | 584 | 45.474 | 50.006 | 97.036  | 0.00 | 0.00 |
| ATOM | 8722 | NZ  | LYS | 584 | 47.155 | 48.768 | 96.335  | 0.00 | 0.00 |
| ATOM | 8723 | HZ1 | LYS | 584 | 48.134 | 48.938 | 96.154  | 0.00 | 0.00 |
| ATOM | 8724 | HZ2 | LYS | 584 | 47.151 | 47.946 | 96.922  | 0.00 | 0.00 |
| ATOM | 8725 | HZ3 | LYS | 584 | 46.544 | 48.737 | 95.532  | 0.00 | 0.00 |
| ATOM | 8726 | C   | LYS | 584 | 46.576 | 53.667 | 100.843 | 0.00 | 0.00 |
| ATOM | 8727 | O   | LYS | 584 | 45.932 | 52.677 | 101.264 | 0.00 | 0.00 |
| ATOM | 8728 | N   | VAL | 585 | 47.494 | 54.241 | 101.633 | 0.00 | 0.00 |
| ATOM | 8729 | H   | VAL | 585 | 48.054 | 54.969 | 101.212 | 0.00 | 0.00 |
| ATOM | 8730 | CA  | VAL | 585 | 48.037 | 53.768 | 102.913 | 0.00 | 0.00 |
| ATOM | 8731 | HA  | VAL | 585 | 47.478 | 52.896 | 103.252 | 0.00 | 0.00 |
| ATOM | 8732 | CB  | VAL | 585 | 49.549 | 53.393 | 102.731 | 0.00 | 0.00 |
| ATOM | 8733 | HB  | VAL | 585 | 49.788 | 52.852 | 103.647 | 0.00 | 0.00 |
| ATOM | 8734 | CG1 | VAL | 585 | 49.834 | 52.226 | 101.660 | 0.00 | 0.00 |

|      |      |      |     |     |        |        |         |      |      |
|------|------|------|-----|-----|--------|--------|---------|------|------|
| ATOM | 8735 | 1HG1 | VAL | 585 | 50.844 | 51.820 | 101.712 | 0.00 | 0.00 |
| ATOM | 8736 | 2HG1 | VAL | 585 | 49.157 | 51.377 | 101.752 | 0.00 | 0.00 |
| ATOM | 8737 | 3HG1 | VAL | 585 | 49.743 | 52.644 | 100.657 | 0.00 | 0.00 |
| ATOM | 8738 | CG2  | VAL | 585 | 50.542 | 54.553 | 102.487 | 0.00 | 0.00 |
| ATOM | 8739 | 1HG2 | VAL | 585 | 51.447 | 54.193 | 102.975 | 0.00 | 0.00 |
| ATOM | 8740 | 2HG2 | VAL | 585 | 50.666 | 54.784 | 101.429 | 0.00 | 0.00 |
| ATOM | 8741 | 3HG2 | VAL | 585 | 50.298 | 55.486 | 102.994 | 0.00 | 0.00 |
| ATOM | 8742 | C    | VAL | 585 | 47.890 | 54.793 | 104.111 | 0.00 | 0.00 |
| ATOM | 8743 | O    | VAL | 585 | 48.171 | 54.476 | 105.234 | 0.00 | 0.00 |
| ATOM | 8744 | N    | GLN | 586 | 47.418 | 55.971 | 103.755 | 0.00 | 0.00 |
| ATOM | 8745 | H    | GLN | 586 | 47.498 | 56.160 | 102.766 | 0.00 | 0.00 |
| ATOM | 8746 | CA   | GLN | 586 | 47.014 | 56.939 | 104.730 | 0.00 | 0.00 |
| ATOM | 8747 | HA   | GLN | 586 | 47.166 | 56.588 | 105.751 | 0.00 | 0.00 |
| ATOM | 8748 | CB   | GLN | 586 | 47.841 | 58.283 | 104.621 | 0.00 | 0.00 |
| ATOM | 8749 | HB2  | GLN | 586 | 47.714 | 58.646 | 103.601 | 0.00 | 0.00 |
| ATOM | 8750 | HB3  | GLN | 586 | 47.474 | 59.034 | 105.321 | 0.00 | 0.00 |
| ATOM | 8751 | CG   | GLN | 586 | 49.400 | 58.176 | 104.900 | 0.00 | 0.00 |
| ATOM | 8752 | HG2  | GLN | 586 | 49.877 | 57.541 | 104.153 | 0.00 | 0.00 |
| ATOM | 8753 | HG3  | GLN | 586 | 49.900 | 59.135 | 104.760 | 0.00 | 0.00 |
| ATOM | 8754 | CD   | GLN | 586 | 49.786 | 57.559 | 106.235 | 0.00 | 0.00 |
| ATOM | 8755 | OE1  | GLN | 586 | 48.954 | 57.319 | 107.074 | 0.00 | 0.00 |
| ATOM | 8756 | NE2  | GLN | 586 | 51.092 | 57.322 | 106.376 | 0.00 | 0.00 |
| ATOM | 8757 | 1HE2 | GLN | 586 | 51.484 | 57.305 | 107.306 | 0.00 | 0.00 |
| ATOM | 8758 | 2HE2 | GLN | 586 | 51.747 | 57.422 | 105.614 | 0.00 | 0.00 |
| ATOM | 8759 | C    | GLN | 586 | 45.485 | 57.379 | 104.621 | 0.00 | 0.00 |
| ATOM | 8760 | O    | GLN | 586 | 44.923 | 58.151 | 105.481 | 0.00 | 0.00 |

|      |      |      |     |     |        |        |         |      |      |
|------|------|------|-----|-----|--------|--------|---------|------|------|
| ATOM | 8761 | N    | ARG | 587 | 44.778 | 56.781 | 103.740 | 0.00 | 0.00 |
| ATOM | 8762 | H    | ARG | 587 | 45.256 | 56.032 | 103.260 | 0.00 | 0.00 |
| ATOM | 8763 | CA   | ARG | 587 | 43.298 | 56.842 | 103.630 | 0.00 | 0.00 |
| ATOM | 8764 | HA   | ARG | 587 | 42.851 | 57.004 | 104.611 | 0.00 | 0.00 |
| ATOM | 8765 | CB   | ARG | 587 | 42.820 | 58.103 | 102.803 | 0.00 | 0.00 |
| ATOM | 8766 | HB2  | ARG | 587 | 43.500 | 58.947 | 102.917 | 0.00 | 0.00 |
| ATOM | 8767 | HB3  | ARG | 587 | 42.673 | 57.818 | 101.761 | 0.00 | 0.00 |
| ATOM | 8768 | CG   | ARG | 587 | 41.498 | 58.679 | 103.276 | 0.00 | 0.00 |
| ATOM | 8769 | HG2  | ARG | 587 | 40.692 | 57.947 | 103.232 | 0.00 | 0.00 |
| ATOM | 8770 | HG3  | ARG | 587 | 41.793 | 58.894 | 104.303 | 0.00 | 0.00 |
| ATOM | 8771 | CD   | ARG | 587 | 40.944 | 59.932 | 102.575 | 0.00 | 0.00 |
| ATOM | 8772 | HD2  | ARG | 587 | 40.088 | 60.337 | 103.114 | 0.00 | 0.00 |
| ATOM | 8773 | HD3  | ARG | 587 | 41.700 | 60.717 | 102.603 | 0.00 | 0.00 |
| ATOM | 8774 | NE   | ARG | 587 | 40.701 | 59.756 | 101.167 | 0.00 | 0.00 |
| ATOM | 8775 | HE   | ARG | 587 | 41.438 | 59.676 | 100.481 | 0.00 | 0.00 |
| ATOM | 8776 | CZ   | ARG | 587 | 39.447 | 59.807 | 100.700 | 0.00 | 0.00 |
| ATOM | 8777 | NH1  | ARG | 587 | 38.411 | 59.586 | 101.384 | 0.00 | 0.00 |
| ATOM | 8778 | 1HH1 | ARG | 587 | 37.504 | 59.424 | 100.968 | 0.00 | 0.00 |
| ATOM | 8779 | 2HH1 | ARG | 587 | 38.523 | 59.361 | 102.362 | 0.00 | 0.00 |
| ATOM | 8780 | NH2  | ARG | 587 | 39.277 | 59.939 | 99.466  | 0.00 | 0.00 |
| ATOM | 8781 | 1HH2 | ARG | 587 | 38.315 | 59.993 | 99.163  | 0.00 | 0.00 |
| ATOM | 8782 | 2HH2 | ARG | 587 | 40.096 | 59.894 | 98.875  | 0.00 | 0.00 |
| ATOM | 8783 | C    | ARG | 587 | 42.672 | 55.593 | 103.009 | 0.00 | 0.00 |
| ATOM | 8784 | O    | ARG | 587 | 41.506 | 55.563 | 102.606 | 0.00 | 0.00 |
| ATOM | 8785 | N    | GLY | 588 | 43.427 | 54.535 | 102.846 | 0.00 | 0.00 |
| ATOM | 8786 | H    | GLY | 588 | 44.374 | 54.534 | 103.196 | 0.00 | 0.00 |

|      |      |      |     |     |        |        |         |      |      |
|------|------|------|-----|-----|--------|--------|---------|------|------|
| ATOM | 8787 | CA   | GLY | 588 | 42.965 | 53.187 | 102.448 | 0.00 | 0.00 |
| ATOM | 8788 | HA2  | GLY | 588 | 43.738 | 52.445 | 102.651 | 0.00 | 0.00 |
| ATOM | 8789 | HA3  | GLY | 588 | 42.113 | 52.843 | 103.034 | 0.00 | 0.00 |
| ATOM | 8790 | C    | GLY | 588 | 42.570 | 53.114 | 100.974 | 0.00 | 0.00 |
| ATOM | 8791 | O    | GLY | 588 | 42.601 | 53.996 | 100.181 | 0.00 | 0.00 |
| ATOM | 8792 | N    | ALA | 589 | 41.968 | 51.966 | 100.623 | 0.00 | 0.00 |
| ATOM | 8793 | H    | ALA | 589 | 41.878 | 51.111 | 101.154 | 0.00 | 0.00 |
| ATOM | 8794 | CA   | ALA | 589 | 41.260 | 51.903 | 99.379  | 0.00 | 0.00 |
| ATOM | 8795 | HA   | ALA | 589 | 41.941 | 51.896 | 98.528  | 0.00 | 0.00 |
| ATOM | 8796 | CB   | ALA | 589 | 40.497 | 50.587 | 99.203  | 0.00 | 0.00 |
| ATOM | 8797 | HB1  | ALA | 589 | 41.103 | 49.733 | 99.506  | 0.00 | 0.00 |
| ATOM | 8798 | HB2  | ALA | 589 | 39.523 | 50.565 | 99.690  | 0.00 | 0.00 |
| ATOM | 8799 | HB3  | ALA | 589 | 40.155 | 50.509 | 98.171  | 0.00 | 0.00 |
| ATOM | 8800 | C    | ALA | 589 | 40.236 | 53.013 | 99.250  | 0.00 | 0.00 |
| ATOM | 8801 | O    | ALA | 589 | 39.686 | 53.404 | 100.270 | 0.00 | 0.00 |
| ATOM | 8802 | N    | LEU | 590 | 40.021 | 53.557 | 98.049  | 0.00 | 0.00 |
| ATOM | 8803 | H    | LEU | 590 | 40.565 | 53.234 | 97.262  | 0.00 | 0.00 |
| ATOM | 8804 | CA   | LEU | 590 | 39.110 | 54.734 | 97.893  | 0.00 | 0.00 |
| ATOM | 8805 | HA   | LEU | 590 | 39.434 | 55.399 | 98.693  | 0.00 | 0.00 |
| ATOM | 8806 | CB   | LEU | 590 | 39.473 | 55.383 | 96.530  | 0.00 | 0.00 |
| ATOM | 8807 | HB2  | LEU | 590 | 40.542 | 55.582 | 96.449  | 0.00 | 0.00 |
| ATOM | 8808 | HB3  | LEU | 590 | 39.275 | 54.697 | 95.706  | 0.00 | 0.00 |
| ATOM | 8809 | CG   | LEU | 590 | 38.737 | 56.686 | 96.209  | 0.00 | 0.00 |
| ATOM | 8810 | HG   | LEU | 590 | 37.695 | 56.437 | 96.012  | 0.00 | 0.00 |
| ATOM | 8811 | CD1  | LEU | 590 | 38.760 | 57.731 | 97.329  | 0.00 | 0.00 |
| ATOM | 8812 | 1HD1 | LEU | 590 | 38.276 | 58.636 | 96.962  | 0.00 | 0.00 |

|      |      |      |     |     |        |        |         |      |      |
|------|------|------|-----|-----|--------|--------|---------|------|------|
| ATOM | 8813 | 2HD1 | LEU | 590 | 38.292 | 57.522 | 98.291  | 0.00 | 0.00 |
| ATOM | 8814 | 3HD1 | LEU | 590 | 39.778 | 58.010 | 97.603  | 0.00 | 0.00 |
| ATOM | 8815 | CD2  | LEU | 590 | 39.481 | 57.276 | 94.982  | 0.00 | 0.00 |
| ATOM | 8816 | 1HD2 | LEU | 590 | 38.844 | 58.072 | 94.598  | 0.00 | 0.00 |
| ATOM | 8817 | 2HD2 | LEU | 590 | 40.493 | 57.525 | 95.304  | 0.00 | 0.00 |
| ATOM | 8818 | 3HD2 | LEU | 590 | 39.532 | 56.515 | 94.203  | 0.00 | 0.00 |
| ATOM | 8819 | C    | LEU | 590 | 37.618 | 54.411 | 98.055  | 0.00 | 0.00 |
| ATOM | 8820 | O    | LEU | 590 | 36.973 | 53.972 | 97.061  | 0.00 | 0.00 |
| ATOM | 8821 | N    | ALA | 591 | 37.138 | 54.696 | 99.269  | 0.00 | 0.00 |
| ATOM | 8822 | H    | ALA | 591 | 37.820 | 54.953 | 99.969  | 0.00 | 0.00 |
| ATOM | 8823 | CA   | ALA | 591 | 35.861 | 54.099 | 99.707  | 0.00 | 0.00 |
| ATOM | 8824 | HA   | ALA | 591 | 35.865 | 53.080 | 99.319  | 0.00 | 0.00 |
| ATOM | 8825 | CB   | ALA | 591 | 35.832 | 53.908 | 101.241 | 0.00 | 0.00 |
| ATOM | 8826 | HB1  | ALA | 591 | 34.858 | 53.518 | 101.537 | 0.00 | 0.00 |
| ATOM | 8827 | HB2  | ALA | 591 | 36.692 | 53.325 | 101.572 | 0.00 | 0.00 |
| ATOM | 8828 | HB3  | ALA | 591 | 35.925 | 54.900 | 101.684 | 0.00 | 0.00 |
| ATOM | 8829 | C    | ALA | 591 | 34.567 | 54.761 | 99.135  | 0.00 | 0.00 |
| ATOM | 8830 | O    | ALA | 591 | 33.473 | 54.286 | 99.463  | 0.00 | 0.00 |
| ATOM | 8831 | N    | GLU | 592 | 34.606 | 55.786 | 98.274  | 0.00 | 0.00 |
| ATOM | 8832 | H    | GLU | 592 | 35.498 | 56.236 | 98.123  | 0.00 | 0.00 |
| ATOM | 8833 | CA   | GLU | 592 | 33.411 | 56.277 | 97.477  | 0.00 | 0.00 |
| ATOM | 8834 | HA   | GLU | 592 | 32.530 | 56.138 | 98.104  | 0.00 | 0.00 |
| ATOM | 8835 | CB   | GLU | 592 | 33.606 | 57.834 | 97.213  | 0.00 | 0.00 |
| ATOM | 8836 | HB2  | GLU | 592 | 32.782 | 58.218 | 96.613  | 0.00 | 0.00 |
| ATOM | 8837 | HB3  | GLU | 592 | 33.680 | 58.416 | 98.132  | 0.00 | 0.00 |
| ATOM | 8838 | CG   | GLU | 592 | 34.967 | 58.152 | 96.534  | 0.00 | 0.00 |

|      |      |     |     |     |        |        |        |      |      |
|------|------|-----|-----|-----|--------|--------|--------|------|------|
| ATOM | 8839 | HG2 | GLU | 592 | 35.760 | 58.143 | 97.282 | 0.00 | 0.00 |
| ATOM | 8840 | HG3 | GLU | 592 | 35.162 | 57.415 | 95.755 | 0.00 | 0.00 |
| ATOM | 8841 | CD  | GLU | 592 | 34.858 | 59.532 | 95.984 | 0.00 | 0.00 |
| ATOM | 8842 | OE1 | GLU | 592 | 35.305 | 60.466 | 96.694 | 0.00 | 0.00 |
| ATOM | 8843 | OE2 | GLU | 592 | 34.395 | 59.786 | 94.896 | 0.00 | 0.00 |
| ATOM | 8844 | C   | GLU | 592 | 33.164 | 55.468 | 96.165 | 0.00 | 0.00 |
| ATOM | 8845 | O   | GLU | 592 | 32.107 | 55.626 | 95.475 | 0.00 | 0.00 |
| ATOM | 8846 | N   | GLU | 593 | 33.993 | 54.438 | 95.893 | 0.00 | 0.00 |
| ATOM | 8847 | H   | GLU | 593 | 34.813 | 54.346 | 96.476 | 0.00 | 0.00 |
| ATOM | 8848 | CA  | GLU | 593 | 33.736 | 53.319 | 94.926 | 0.00 | 0.00 |
| ATOM | 8849 | HA  | GLU | 593 | 32.687 | 53.440 | 94.655 | 0.00 | 0.00 |
| ATOM | 8850 | CB  | GLU | 593 | 34.550 | 53.609 | 93.643 | 0.00 | 0.00 |
| ATOM | 8851 | HB2 | GLU | 593 | 33.919 | 54.362 | 93.172 | 0.00 | 0.00 |
| ATOM | 8852 | HB3 | GLU | 593 | 35.404 | 54.202 | 93.971 | 0.00 | 0.00 |
| ATOM | 8853 | CG  | GLU | 593 | 34.819 | 52.460 | 92.724 | 0.00 | 0.00 |
| ATOM | 8854 | HG2 | GLU | 593 | 35.303 | 52.904 | 91.854 | 0.00 | 0.00 |
| ATOM | 8855 | HG3 | GLU | 593 | 35.542 | 51.826 | 93.236 | 0.00 | 0.00 |
| ATOM | 8856 | CD  | GLU | 593 | 33.632 | 51.663 | 92.232 | 0.00 | 0.00 |
| ATOM | 8857 | OE1 | GLU | 593 | 33.833 | 50.579 | 91.649 | 0.00 | 0.00 |
| ATOM | 8858 | OE2 | GLU | 593 | 32.480 | 52.170 | 92.317 | 0.00 | 0.00 |
| ATOM | 8859 | C   | GLU | 593 | 34.040 | 51.943 | 95.499 | 0.00 | 0.00 |
| ATOM | 8860 | O   | GLU | 593 | 33.335 | 50.993 | 95.178 | 0.00 | 0.00 |
| ATOM | 8861 | N   | THR | 594 | 34.968 | 51.863 | 96.432 | 0.00 | 0.00 |
| ATOM | 8862 | H   | THR | 594 | 35.504 | 52.704 | 96.591 | 0.00 | 0.00 |
| ATOM | 8863 | CA  | THR | 594 | 35.480 | 50.711 | 97.160 | 0.00 | 0.00 |
| ATOM | 8864 | HA  | THR | 594 | 36.271 | 51.078 | 97.815 | 0.00 | 0.00 |



|      |      |      |     |     |        |        |        |      |      |
|------|------|------|-----|-----|--------|--------|--------|------|------|
| ATOM | 8865 | CB   | THR | 594 | 34.329 | 50.177 | 97.998 | 0.00 | 0.00 |
| ATOM | 8866 | HB   | THR | 594 | 33.544 | 49.716 | 97.398 | 0.00 | 0.00 |
| ATOM | 8867 | CG2  | THR | 594 | 34.802 | 49.221 | 99.076 | 0.00 | 0.00 |
| ATOM | 8868 | 1HG2 | THR | 594 | 34.018 | 49.116 | 99.826 | 0.00 | 0.00 |
| ATOM | 8869 | 2HG2 | THR | 594 | 35.086 | 48.234 | 98.711 | 0.00 | 0.00 |
| ATOM | 8870 | 3HG2 | THR | 594 | 35.710 | 49.554 | 99.578 | 0.00 | 0.00 |
| ATOM | 8871 | OG1  | THR | 594 | 33.738 | 51.262 | 98.710 | 0.00 | 0.00 |
| ATOM | 8872 | HG1  | THR | 594 | 33.283 | 51.824 | 98.079 | 0.00 | 0.00 |
| ATOM | 8873 | C    | THR | 594 | 36.162 | 49.628 | 96.293 | 0.00 | 0.00 |
| ATOM | 8874 | O    | THR | 594 | 36.228 | 48.417 | 96.643 | 0.00 | 0.00 |
| ATOM | 8875 | N    | GLY | 595 | 36.668 | 50.044 | 95.099 | 0.00 | 0.00 |
| ATOM | 8876 | H    | GLY | 595 | 36.548 | 50.995 | 94.780 | 0.00 | 0.00 |
| ATOM | 8877 | CA   | GLY | 595 | 37.391 | 49.095 | 94.211 | 0.00 | 0.00 |
| ATOM | 8878 | HA2  | GLY | 595 | 36.698 | 48.269 | 94.048 | 0.00 | 0.00 |
| ATOM | 8879 | HA3  | GLY | 595 | 37.739 | 49.570 | 93.294 | 0.00 | 0.00 |
| ATOM | 8880 | C    | GLY | 595 | 38.580 | 48.425 | 94.921 | 0.00 | 0.00 |
| ATOM | 8881 | O    | GLY | 595 | 39.159 | 48.985 | 95.842 | 0.00 | 0.00 |
| ATOM | 8882 | N    | ASP | 596 | 38.885 | 47.223 | 94.551 | 0.00 | 0.00 |
| ATOM | 8883 | H    | ASP | 596 | 38.446 | 46.781 | 93.756 | 0.00 | 0.00 |
| ATOM | 8884 | CA   | ASP | 596 | 40.064 | 46.428 | 95.072 | 0.00 | 0.00 |
| ATOM | 8885 | HA   | ASP | 596 | 40.175 | 46.747 | 96.109 | 0.00 | 0.00 |
| ATOM | 8886 | CB   | ASP | 596 | 39.762 | 44.944 | 95.020 | 0.00 | 0.00 |
| ATOM | 8887 | HB2  | ASP | 596 | 39.847 | 44.654 | 93.973 | 0.00 | 0.00 |
| ATOM | 8888 | HB3  | ASP | 596 | 38.769 | 44.865 | 95.463 | 0.00 | 0.00 |
| ATOM | 8889 | CG   | ASP | 596 | 40.666 | 44.207 | 95.965 | 0.00 | 0.00 |
| ATOM | 8890 | OD1  | ASP | 596 | 40.427 | 44.227 | 97.206 | 0.00 | 0.00 |

|      |      |      |     |     |        |        |        |      |      |
|------|------|------|-----|-----|--------|--------|--------|------|------|
| ATOM | 8891 | OD2  | ASP | 596 | 41.671 | 43.546 | 95.539 | 0.00 | 0.00 |
| ATOM | 8892 | C    | ASP | 596 | 41.323 | 46.735 | 94.300 | 0.00 | 0.00 |
| ATOM | 8893 | O    | ASP | 596 | 42.381 | 46.946 | 94.881 | 0.00 | 0.00 |
| ATOM | 8894 | N    | ASN | 597 | 41.213 | 46.778 | 93.007 | 0.00 | 0.00 |
| ATOM | 8895 | H    | ASN | 597 | 40.284 | 46.801 | 92.610 | 0.00 | 0.00 |
| ATOM | 8896 | CA   | ASN | 597 | 42.262 | 47.378 | 92.103 | 0.00 | 0.00 |
| ATOM | 8897 | HA   | ASN | 597 | 43.237 | 46.972 | 92.371 | 0.00 | 0.00 |
| ATOM | 8898 | CB   | ASN | 597 | 41.967 | 46.856 | 90.611 | 0.00 | 0.00 |
| ATOM | 8899 | HB2  | ASN | 597 | 42.803 | 47.202 | 90.003 | 0.00 | 0.00 |
| ATOM | 8900 | HB3  | ASN | 597 | 41.969 | 45.767 | 90.549 | 0.00 | 0.00 |
| ATOM | 8901 | CG   | ASN | 597 | 40.636 | 47.254 | 90.084 | 0.00 | 0.00 |
| ATOM | 8902 | OD1  | ASN | 597 | 40.301 | 48.440 | 89.974 | 0.00 | 0.00 |
| ATOM | 8903 | ND2  | ASN | 597 | 39.839 | 46.276 | 89.671 | 0.00 | 0.00 |
| ATOM | 8904 | 1HD2 | ASN | 597 | 39.009 | 46.550 | 89.165 | 0.00 | 0.00 |
| ATOM | 8905 | 2HD2 | ASN | 597 | 40.211 | 45.352 | 89.506 | 0.00 | 0.00 |
| ATOM | 8906 | C    | ASN | 597 | 42.326 | 48.921 | 92.218 | 0.00 | 0.00 |
| ATOM | 8907 | O    | ASN | 597 | 41.437 | 49.636 | 92.687 | 0.00 | 0.00 |
| ATOM | 8908 | N    | ASP | 598 | 43.490 | 49.553 | 91.848 | 0.00 | 0.00 |
| ATOM | 8909 | H    | ASP | 598 | 44.331 | 49.041 | 91.622 | 0.00 | 0.00 |
| ATOM | 8910 | CA   | ASP | 598 | 43.732 | 50.951 | 92.111 | 0.00 | 0.00 |
| ATOM | 8911 | HA   | ASP | 598 | 43.218 | 51.113 | 93.058 | 0.00 | 0.00 |
| ATOM | 8912 | CB   | ASP | 598 | 45.157 | 51.043 | 92.545 | 0.00 | 0.00 |
| ATOM | 8913 | HB2  | ASP | 598 | 45.818 | 50.599 | 91.801 | 0.00 | 0.00 |
| ATOM | 8914 | HB3  | ASP | 598 | 45.464 | 52.070 | 92.741 | 0.00 | 0.00 |
| ATOM | 8915 | CG   | ASP | 598 | 45.401 | 50.253 | 93.855 | 0.00 | 0.00 |
| ATOM | 8916 | OD1  | ASP | 598 | 44.961 | 50.673 | 94.940 | 0.00 | 0.00 |

|      |      |      |     |     |        |        |        |      |      |
|------|------|------|-----|-----|--------|--------|--------|------|------|
| ATOM | 8917 | OD2  | ASP | 598 | 46.049 | 49.233 | 93.796 | 0.00 | 0.00 |
| ATOM | 8918 | C    | ASP | 598 | 43.151 | 51.953 | 91.048 | 0.00 | 0.00 |
| ATOM | 8919 | O    | ASP | 598 | 43.504 | 53.160 | 90.981 | 0.00 | 0.00 |
| ATOM | 8920 | N    | ASN | 599 | 42.306 | 51.422 | 90.137 | 0.00 | 0.00 |
| ATOM | 8921 | H    | ASN | 599 | 42.023 | 50.468 | 90.309 | 0.00 | 0.00 |
| ATOM | 8922 | CA   | ASN | 599 | 41.819 | 52.092 | 88.938 | 0.00 | 0.00 |
| ATOM | 8923 | HA   | ASN | 599 | 42.707 | 52.351 | 88.360 | 0.00 | 0.00 |
| ATOM | 8924 | CB   | ASN | 599 | 41.024 | 51.122 | 87.936 | 0.00 | 0.00 |
| ATOM | 8925 | HB2  | ASN | 599 | 40.143 | 50.714 | 88.432 | 0.00 | 0.00 |
| ATOM | 8926 | HB3  | ASN | 599 | 40.695 | 51.639 | 87.034 | 0.00 | 0.00 |
| ATOM | 8927 | CG   | ASN | 599 | 41.845 | 49.919 | 87.463 | 0.00 | 0.00 |
| ATOM | 8928 | OD1  | ASN | 599 | 42.807 | 49.446 | 88.028 | 0.00 | 0.00 |
| ATOM | 8929 | ND2  | ASN | 599 | 41.545 | 49.475 | 86.250 | 0.00 | 0.00 |
| ATOM | 8930 | 1HD2 | ASN | 599 | 42.114 | 48.871 | 85.674 | 0.00 | 0.00 |
| ATOM | 8931 | 2HD2 | ASN | 599 | 40.825 | 49.928 | 85.706 | 0.00 | 0.00 |
| ATOM | 8932 | C    | ASN | 599 | 41.043 | 53.369 | 89.149 | 0.00 | 0.00 |
| ATOM | 8933 | O    | ASN | 599 | 41.149 | 54.301 | 88.378 | 0.00 | 0.00 |
| ATOM | 8934 | N    | PHE | 600 | 40.155 | 53.425 | 90.172 | 0.00 | 0.00 |
| ATOM | 8935 | H    | PHE | 600 | 39.973 | 52.596 | 90.720 | 0.00 | 0.00 |
| ATOM | 8936 | CA   | PHE | 600 | 39.330 | 54.652 | 90.370 | 0.00 | 0.00 |
| ATOM | 8937 | HA   | PHE | 600 | 39.011 | 54.997 | 89.386 | 0.00 | 0.00 |
| ATOM | 8938 | CB   | PHE | 600 | 38.092 | 54.105 | 91.115 | 0.00 | 0.00 |
| ATOM | 8939 | HB2  | PHE | 600 | 37.637 | 53.346 | 90.479 | 0.00 | 0.00 |
| ATOM | 8940 | HB3  | PHE | 600 | 38.372 | 53.703 | 92.089 | 0.00 | 0.00 |
| ATOM | 8941 | CG   | PHE | 600 | 37.000 | 55.107 | 91.331 | 0.00 | 0.00 |
| ATOM | 8942 | CD1  | PHE | 600 | 36.980 | 55.792 | 92.558 | 0.00 | 0.00 |

|      |      |     |     |     |        |        |        |      |      |
|------|------|-----|-----|-----|--------|--------|--------|------|------|
| ATOM | 8943 | HD1 | PHE | 600 | 37.787 | 55.672 | 93.266 | 0.00 | 0.00 |
| ATOM | 8944 | CE1 | PHE | 600 | 35.828 | 56.556 | 92.850 | 0.00 | 0.00 |
| ATOM | 8945 | HE1 | PHE | 600 | 35.758 | 57.025 | 93.821 | 0.00 | 0.00 |
| ATOM | 8946 | CZ  | PHE | 600 | 34.773 | 56.798 | 91.927 | 0.00 | 0.00 |
| ATOM | 8947 | HZ  | PHE | 600 | 34.066 | 57.571 | 92.187 | 0.00 | 0.00 |
| ATOM | 8948 | CE2 | PHE | 600 | 34.795 | 56.161 | 90.701 | 0.00 | 0.00 |
| ATOM | 8949 | HE2 | PHE | 600 | 33.983 | 56.289 | 90.000 | 0.00 | 0.00 |
| ATOM | 8950 | CD2 | PHE | 600 | 35.871 | 55.250 | 90.462 | 0.00 | 0.00 |
| ATOM | 8951 | HD2 | PHE | 600 | 35.928 | 54.667 | 89.554 | 0.00 | 0.00 |
| ATOM | 8952 | C   | PHE | 600 | 40.111 | 55.726 | 91.124 | 0.00 | 0.00 |
| ATOM | 8953 | O   | PHE | 600 | 39.839 | 56.940 | 90.953 | 0.00 | 0.00 |
| ATOM | 8954 | N   | ARG | 601 | 41.101 | 55.428 | 91.985 | 0.00 | 0.00 |
| ATOM | 8955 | H   | ARG | 601 | 41.370 | 54.479 | 92.198 | 0.00 | 0.00 |
| ATOM | 8956 | CA  | ARG | 601 | 42.160 | 56.423 | 92.371 | 0.00 | 0.00 |
| ATOM | 8957 | HA  | ARG | 601 | 41.639 | 57.348 | 92.619 | 0.00 | 0.00 |
| ATOM | 8958 | CB  | ARG | 601 | 42.961 | 55.926 | 93.596 | 0.00 | 0.00 |
| ATOM | 8959 | HB2 | ARG | 601 | 42.283 | 55.656 | 94.405 | 0.00 | 0.00 |
| ATOM | 8960 | HB3 | ARG | 601 | 43.514 | 55.013 | 93.377 | 0.00 | 0.00 |
| ATOM | 8961 | CG  | ARG | 601 | 43.989 | 56.967 | 94.161 | 0.00 | 0.00 |
| ATOM | 8962 | HG2 | ARG | 601 | 44.924 | 56.948 | 93.602 | 0.00 | 0.00 |
| ATOM | 8963 | HG3 | ARG | 601 | 43.515 | 57.947 | 94.095 | 0.00 | 0.00 |
| ATOM | 8964 | CD  | ARG | 601 | 44.426 | 56.742 | 95.643 | 0.00 | 0.00 |
| ATOM | 8965 | HD2 | ARG | 601 | 44.653 | 55.676 | 95.666 | 0.00 | 0.00 |
| ATOM | 8966 | HD3 | ARG | 601 | 45.259 | 57.436 | 95.757 | 0.00 | 0.00 |
| ATOM | 8967 | NE  | ARG | 601 | 43.349 | 56.920 | 96.588 | 0.00 | 0.00 |
| ATOM | 8968 | HE  | ARG | 601 | 43.142 | 57.891 | 96.770 | 0.00 | 0.00 |

ATOM 8969 CZ ARG 601 43.124 56.167 97.645 0.00 0.00  
ATOM 8970 NH1 ARG 601 43.466 54.879 97.572 0.00 0.00  
ATOM 8971 1HH1 ARG 601 43.280 54.266 98.352 0.00 0.00  
ATOM 8972 2HH1 ARG 601 43.963 54.587 96.742 0.00 0.00  
ATOM 8973 NH2 ARG 601 42.608 56.680 98.702 0.00 0.00  
ATOM 8974 1HH2 ARG 601 42.748 56.135 99.541 0.00 0.00  
ATOM 8975 2HH2 ARG 601 42.550 57.688 98.745 0.00 0.00  
ATOM 8976 C ARG 601 43.114 56.762 91.257 0.00 0.00  
ATOM 8977 O ARG 601 43.541 57.904 91.214 0.00 0.00  
ATOM 8978 N VAL 602 43.440 55.893 90.311 0.00 0.00  
ATOM 8979 H VAL 602 43.232 54.920 90.487 0.00 0.00  
ATOM 8980 CA VAL 602 44.355 56.260 89.212 0.00 0.00  
ATOM 8981 HA VAL 602 45.227 56.664 89.725 0.00 0.00  
ATOM 8982 CB VAL 602 44.896 55.007 88.481 0.00 0.00  
ATOM 8983 HB VAL 602 44.101 54.270 88.364 0.00 0.00  
ATOM 8984 CG1 VAL 602 45.463 55.376 87.052 0.00 0.00  
ATOM 8985 1HG1 VAL 602 46.343 56.020 87.043 0.00 0.00  
ATOM 8986 2HG1 VAL 602 45.871 54.424 86.713 0.00 0.00  
ATOM 8987 3HG1 VAL 602 44.654 55.885 86.529 0.00 0.00  
ATOM 8988 CG2 VAL 602 46.011 54.403 89.323 0.00 0.00  
ATOM 8989 1HG2 VAL 602 45.841 54.500 90.396 0.00 0.00  
ATOM 8990 2HG2 VAL 602 46.219 53.376 89.022 0.00 0.00  
ATOM 8991 3HG2 VAL 602 46.905 55.000 89.144 0.00 0.00  
ATOM 8992 C VAL 602 43.622 57.238 88.278 0.00 0.00  
ATOM 8993 O VAL 602 44.167 58.213 87.837 0.00 0.00  
ATOM 8994 N LYS 603 42.330 57.011 87.948 0.00 0.00

|      |      |     |     |     |        |        |        |      |      |
|------|------|-----|-----|-----|--------|--------|--------|------|------|
| ATOM | 8995 | H   | LYS | 603 | 42.004 | 56.082 | 88.172 | 0.00 | 0.00 |
| ATOM | 8996 | CA  | LYS | 603 | 41.576 | 57.889 | 86.994 | 0.00 | 0.00 |
| ATOM | 8997 | HA  | LYS | 603 | 42.189 | 57.962 | 86.096 | 0.00 | 0.00 |
| ATOM | 8998 | CB  | LYS | 603 | 40.282 | 57.142 | 86.716 | 0.00 | 0.00 |
| ATOM | 8999 | HB2 | LYS | 603 | 39.997 | 56.700 | 87.671 | 0.00 | 0.00 |
| ATOM | 9000 | HB3 | LYS | 603 | 39.497 | 57.809 | 86.361 | 0.00 | 0.00 |
| ATOM | 9001 | CG  | LYS | 603 | 40.435 | 56.065 | 85.692 | 0.00 | 0.00 |
| ATOM | 9002 | HG2 | LYS | 603 | 40.416 | 56.517 | 84.701 | 0.00 | 0.00 |
| ATOM | 9003 | HG3 | LYS | 603 | 41.371 | 55.506 | 85.700 | 0.00 | 0.00 |
| ATOM | 9004 | CD  | LYS | 603 | 39.181 | 55.080 | 85.719 | 0.00 | 0.00 |
| ATOM | 9005 | HD2 | LYS | 603 | 38.995 | 54.658 | 86.707 | 0.00 | 0.00 |
| ATOM | 9006 | HD3 | LYS | 603 | 38.257 | 55.551 | 85.385 | 0.00 | 0.00 |
| ATOM | 9007 | CE  | LYS | 603 | 39.592 | 53.953 | 84.713 | 0.00 | 0.00 |
| ATOM | 9008 | HE2 | LYS | 603 | 39.969 | 54.570 | 83.897 | 0.00 | 0.00 |
| ATOM | 9009 | HE3 | LYS | 603 | 40.363 | 53.302 | 85.124 | 0.00 | 0.00 |
| ATOM | 9010 | NZ  | LYS | 603 | 38.493 | 53.108 | 84.253 | 0.00 | 0.00 |
| ATOM | 9011 | HZ1 | LYS | 603 | 38.893 | 52.442 | 83.607 | 0.00 | 0.00 |
| ATOM | 9012 | HZ2 | LYS | 603 | 38.215 | 52.390 | 84.907 | 0.00 | 0.00 |
| ATOM | 9013 | HZ3 | LYS | 603 | 37.713 | 53.673 | 83.951 | 0.00 | 0.00 |
| ATOM | 9014 | C   | LYS | 603 | 41.373 | 59.312 | 87.514 | 0.00 | 0.00 |
| ATOM | 9015 | O   | LYS | 603 | 41.590 | 60.229 | 86.777 | 0.00 | 0.00 |
| ATOM | 9016 | N   | ARG | 604 | 41.104 | 59.387 | 88.795 | 0.00 | 0.00 |
| ATOM | 9017 | H   | ARG | 604 | 40.940 | 58.500 | 89.250 | 0.00 | 0.00 |
| ATOM | 9018 | CA  | ARG | 604 | 41.018 | 60.592 | 89.597 | 0.00 | 0.00 |
| ATOM | 9019 | HA  | ARG | 604 | 40.164 | 61.201 | 89.298 | 0.00 | 0.00 |
| ATOM | 9020 | CB  | ARG | 604 | 40.742 | 60.246 | 91.060 | 0.00 | 0.00 |

|      |      |      |     |     |        |        |        |      |      |
|------|------|------|-----|-----|--------|--------|--------|------|------|
| ATOM | 9021 | HB2  | ARG | 604 | 39.822 | 59.681 | 91.210 | 0.00 | 0.00 |
| ATOM | 9022 | HB3  | ARG | 604 | 41.587 | 59.667 | 91.433 | 0.00 | 0.00 |
| ATOM | 9023 | CG   | ARG | 604 | 40.646 | 61.481 | 91.949 | 0.00 | 0.00 |
| ATOM | 9024 | HG2  | ARG | 604 | 41.632 | 61.807 | 92.278 | 0.00 | 0.00 |
| ATOM | 9025 | HG3  | ARG | 604 | 40.121 | 62.317 | 91.485 | 0.00 | 0.00 |
| ATOM | 9026 | CD   | ARG | 604 | 39.797 | 61.236 | 93.190 | 0.00 | 0.00 |
| ATOM | 9027 | HD2  | ARG | 604 | 40.033 | 60.249 | 93.589 | 0.00 | 0.00 |
| ATOM | 9028 | HD3  | ARG | 604 | 40.007 | 61.938 | 93.997 | 0.00 | 0.00 |
| ATOM | 9029 | NE   | ARG | 604 | 38.398 | 61.333 | 92.747 | 0.00 | 0.00 |
| ATOM | 9030 | HE   | ARG | 604 | 38.160 | 61.628 | 91.811 | 0.00 | 0.00 |
| ATOM | 9031 | CZ   | ARG | 604 | 37.354 | 61.207 | 93.574 | 0.00 | 0.00 |
| ATOM | 9032 | NH1  | ARG | 604 | 37.457 | 60.985 | 94.838 | 0.00 | 0.00 |
| ATOM | 9033 | 1HH1 | ARG | 604 | 36.666 | 60.878 | 95.457 | 0.00 | 0.00 |
| ATOM | 9034 | 2HH1 | ARG | 604 | 38.346 | 61.100 | 95.305 | 0.00 | 0.00 |
| ATOM | 9035 | NH2  | ARG | 604 | 36.182 | 61.202 | 93.092 | 0.00 | 0.00 |
| ATOM | 9036 | 1HH2 | ARG | 604 | 35.418 | 60.906 | 93.683 | 0.00 | 0.00 |
| ATOM | 9037 | 2HH2 | ARG | 604 | 35.956 | 61.170 | 92.108 | 0.00 | 0.00 |
| ATOM | 9038 | C    | ARG | 604 | 42.321 | 61.434 | 89.519 | 0.00 | 0.00 |
| ATOM | 9039 | O    | ARG | 604 | 42.180 | 62.632 | 89.401 | 0.00 | 0.00 |
| ATOM | 9040 | N    | TYR | 605 | 43.585 | 60.829 | 89.492 | 0.00 | 0.00 |
| ATOM | 9041 | H    | TYR | 605 | 43.660 | 59.822 | 89.507 | 0.00 | 0.00 |
| ATOM | 9042 | CA   | TYR | 605 | 44.790 | 61.583 | 89.474 | 0.00 | 0.00 |
| ATOM | 9043 | HA   | TYR | 605 | 44.645 | 62.576 | 89.901 | 0.00 | 0.00 |
| ATOM | 9044 | CB   | TYR | 605 | 45.804 | 60.792 | 90.333 | 0.00 | 0.00 |
| ATOM | 9045 | HB2  | TYR | 605 | 45.790 | 59.764 | 89.969 | 0.00 | 0.00 |
| ATOM | 9046 | HB3  | TYR | 605 | 46.716 | 61.345 | 90.108 | 0.00 | 0.00 |

|      |      |      |     |     |        |        |        |      |      |
|------|------|------|-----|-----|--------|--------|--------|------|------|
| ATOM | 9047 | CG   | TYR | 605 | 45.607 | 60.864 | 91.835 | 0.00 | 0.00 |
| ATOM | 9048 | CD1  | TYR | 605 | 44.454 | 60.455 | 92.480 | 0.00 | 0.00 |
| ATOM | 9049 | HD1  | TYR | 605 | 43.623 | 60.089 | 91.895 | 0.00 | 0.00 |
| ATOM | 9050 | CE1  | TYR | 605 | 44.307 | 60.545 | 93.887 | 0.00 | 0.00 |
| ATOM | 9051 | HE1  | TYR | 605 | 43.476 | 60.132 | 94.439 | 0.00 | 0.00 |
| ATOM | 9052 | CZ   | TYR | 605 | 45.412 | 61.129 | 94.606 | 0.00 | 0.00 |
| ATOM | 9053 | OH   | TYR | 605 | 45.306 | 61.225 | 95.949 | 0.00 | 0.00 |
| ATOM | 9054 | HH   | TYR | 605 | 44.569 | 60.798 | 96.391 | 0.00 | 0.00 |
| ATOM | 9055 | CE2  | TYR | 605 | 46.541 | 61.679 | 93.923 | 0.00 | 0.00 |
| ATOM | 9056 | HE2  | TYR | 605 | 47.375 | 62.129 | 94.441 | 0.00 | 0.00 |
| ATOM | 9057 | CD2  | TYR | 605 | 46.672 | 61.555 | 92.506 | 0.00 | 0.00 |
| ATOM | 9058 | HD2  | TYR | 605 | 47.559 | 61.891 | 91.988 | 0.00 | 0.00 |
| ATOM | 9059 | C    | TYR | 605 | 45.289 | 61.940 | 88.102 | 0.00 | 0.00 |
| ATOM | 9060 | O    | TYR | 605 | 45.656 | 63.151 | 87.865 | 0.00 | 0.00 |
| ATOM | 9061 | N    | ILE | 606 | 45.290 | 61.042 | 87.137 | 0.00 | 0.00 |
| ATOM | 9062 | H    | ILE | 606 | 45.005 | 60.083 | 87.275 | 0.00 | 0.00 |
| ATOM | 9063 | CA   | ILE | 606 | 45.654 | 61.335 | 85.730 | 0.00 | 0.00 |
| ATOM | 9064 | HA   | ILE | 606 | 46.710 | 61.605 | 85.731 | 0.00 | 0.00 |
| ATOM | 9065 | CB   | ILE | 606 | 45.403 | 60.150 | 84.783 | 0.00 | 0.00 |
| ATOM | 9066 | HB   | ILE | 606 | 45.744 | 59.290 | 85.358 | 0.00 | 0.00 |
| ATOM | 9067 | CG2  | ILE | 606 | 44.036 | 59.851 | 84.337 | 0.00 | 0.00 |
| ATOM | 9068 | 1HG2 | ILE | 606 | 43.282 | 59.845 | 85.125 | 0.00 | 0.00 |
| ATOM | 9069 | 2HG2 | ILE | 606 | 43.857 | 60.656 | 83.625 | 0.00 | 0.00 |
| ATOM | 9070 | 3HG2 | ILE | 606 | 44.072 | 58.839 | 83.935 | 0.00 | 0.00 |
| ATOM | 9071 | CG1  | ILE | 606 | 46.336 | 60.299 | 83.610 | 0.00 | 0.00 |
| ATOM | 9072 | 2HG1 | ILE | 606 | 45.885 | 59.793 | 82.757 | 0.00 | 0.00 |



|      |      |      |     |     |        |        |        |      |      |
|------|------|------|-----|-----|--------|--------|--------|------|------|
| ATOM | 9073 | 3HG1 | ILE | 606 | 46.337 | 61.360 | 83.357 | 0.00 | 0.00 |
| ATOM | 9074 | CD1  | ILE | 606 | 47.741 | 59.761 | 83.889 | 0.00 | 0.00 |
| ATOM | 9075 | 1HD1 | ILE | 606 | 48.084 | 60.319 | 84.760 | 0.00 | 0.00 |
| ATOM | 9076 | 2HD1 | ILE | 606 | 47.703 | 58.675 | 83.979 | 0.00 | 0.00 |
| ATOM | 9077 | 3HD1 | ILE | 606 | 48.443 | 60.047 | 83.105 | 0.00 | 0.00 |
| ATOM | 9078 | C    | ILE | 606 | 44.776 | 62.579 | 85.289 | 0.00 | 0.00 |
| ATOM | 9079 | O    | ILE | 606 | 45.360 | 63.541 | 84.706 | 0.00 | 0.00 |
| ATOM | 9080 | N    | ALA | 607 | 43.409 | 62.547 | 85.559 | 0.00 | 0.00 |
| ATOM | 9081 | H    | ALA | 607 | 42.956 | 61.776 | 86.029 | 0.00 | 0.00 |
| ATOM | 9082 | CA   | ALA | 607 | 42.553 | 63.680 | 85.091 | 0.00 | 0.00 |
| ATOM | 9083 | HA   | ALA | 607 | 42.709 | 63.700 | 84.012 | 0.00 | 0.00 |
| ATOM | 9084 | CB   | ALA | 607 | 41.107 | 63.248 | 85.417 | 0.00 | 0.00 |
| ATOM | 9085 | HB1  | ALA | 607 | 41.022 | 63.020 | 86.480 | 0.00 | 0.00 |
| ATOM | 9086 | HB2  | ALA | 607 | 40.368 | 64.044 | 85.322 | 0.00 | 0.00 |
| ATOM | 9087 | HB3  | ALA | 607 | 40.911 | 62.346 | 84.837 | 0.00 | 0.00 |
| ATOM | 9088 | C    | ALA | 607 | 43.015 | 65.029 | 85.626 | 0.00 | 0.00 |
| ATOM | 9089 | O    | ALA | 607 | 42.671 | 65.993 | 85.084 | 0.00 | 0.00 |
| ATOM | 9090 | N    | LYS | 608 | 43.891 | 65.078 | 86.686 | 0.00 | 0.00 |
| ATOM | 9091 | H    | LYS | 608 | 44.125 | 64.210 | 87.146 | 0.00 | 0.00 |
| ATOM | 9092 | CA   | LYS | 608 | 44.314 | 66.359 | 87.331 | 0.00 | 0.00 |
| ATOM | 9093 | HA   | LYS | 608 | 43.449 | 67.022 | 87.319 | 0.00 | 0.00 |
| ATOM | 9094 | CB   | LYS | 608 | 44.973 | 66.131 | 88.719 | 0.00 | 0.00 |
| ATOM | 9095 | HB2  | LYS | 608 | 45.822 | 65.510 | 88.434 | 0.00 | 0.00 |
| ATOM | 9096 | HB3  | LYS | 608 | 45.303 | 67.067 | 89.169 | 0.00 | 0.00 |
| ATOM | 9097 | CG   | LYS | 608 | 43.970 | 65.440 | 89.711 | 0.00 | 0.00 |
| ATOM | 9098 | HG2  | LYS | 608 | 43.221 | 66.177 | 89.999 | 0.00 | 0.00 |

|      |      |     |     |     |        |        |        |      |      |
|------|------|-----|-----|-----|--------|--------|--------|------|------|
| ATOM | 9099 | HG3 | LYS | 608 | 43.457 | 64.584 | 89.275 | 0.00 | 0.00 |
| ATOM | 9100 | CD  | LYS | 608 | 44.776 | 64.911 | 90.864 | 0.00 | 0.00 |
| ATOM | 9101 | HD2 | LYS | 608 | 45.596 | 64.245 | 90.595 | 0.00 | 0.00 |
| ATOM | 9102 | HD3 | LYS | 608 | 45.339 | 65.715 | 91.339 | 0.00 | 0.00 |
| ATOM | 9103 | CE  | LYS | 608 | 43.928 | 64.297 | 91.961 | 0.00 | 0.00 |
| ATOM | 9104 | HE2 | LYS | 608 | 43.569 | 63.344 | 91.573 | 0.00 | 0.00 |
| ATOM | 9105 | HE3 | LYS | 608 | 44.636 | 64.101 | 92.767 | 0.00 | 0.00 |
| ATOM | 9106 | NZ  | LYS | 608 | 42.771 | 65.154 | 92.411 | 0.00 | 0.00 |
| ATOM | 9107 | HZ1 | LYS | 608 | 42.072 | 65.197 | 91.682 | 0.00 | 0.00 |
| ATOM | 9108 | HZ2 | LYS | 608 | 42.207 | 64.760 | 93.150 | 0.00 | 0.00 |
| ATOM | 9109 | HZ3 | LYS | 608 | 43.135 | 66.057 | 92.680 | 0.00 | 0.00 |
| ATOM | 9110 | C   | LYS | 608 | 45.245 | 67.061 | 86.338 | 0.00 | 0.00 |
| ATOM | 9111 | O   | LYS | 608 | 45.371 | 68.313 | 86.386 | 0.00 | 0.00 |
| ATOM | 9112 | N   | TYR | 609 | 45.831 | 66.352 | 85.414 | 0.00 | 0.00 |
| ATOM | 9113 | H   | TYR | 609 | 45.628 | 65.362 | 85.403 | 0.00 | 0.00 |
| ATOM | 9114 | CA  | TYR | 609 | 46.788 | 67.010 | 84.435 | 0.00 | 0.00 |
| ATOM | 9115 | HA  | TYR | 609 | 46.677 | 68.094 | 84.391 | 0.00 | 0.00 |
| ATOM | 9116 | CB  | TYR | 609 | 48.196 | 66.811 | 85.039 | 0.00 | 0.00 |
| ATOM | 9117 | HB2 | TYR | 609 | 48.847 | 67.527 | 84.536 | 0.00 | 0.00 |
| ATOM | 9118 | HB3 | TYR | 609 | 48.111 | 67.093 | 86.088 | 0.00 | 0.00 |
| ATOM | 9119 | CG  | TYR | 609 | 48.703 | 65.335 | 84.956 | 0.00 | 0.00 |
| ATOM | 9120 | CD1 | TYR | 609 | 49.532 | 65.039 | 83.904 | 0.00 | 0.00 |
| ATOM | 9121 | HD1 | TYR | 609 | 49.773 | 65.770 | 83.147 | 0.00 | 0.00 |
| ATOM | 9122 | CE1 | TYR | 609 | 50.157 | 63.806 | 83.769 | 0.00 | 0.00 |
| ATOM | 9123 | HE1 | TYR | 609 | 50.793 | 63.598 | 82.921 | 0.00 | 0.00 |
| ATOM | 9124 | CZ  | TYR | 609 | 50.048 | 62.819 | 84.804 | 0.00 | 0.00 |

|      |      |      |     |     |        |        |        |      |      |
|------|------|------|-----|-----|--------|--------|--------|------|------|
| ATOM | 9125 | OH   | TYR | 609 | 50.763 | 61.654 | 84.800 | 0.00 | 0.00 |
| ATOM | 9126 | HH   | TYR | 609 | 51.106 | 61.448 | 83.927 | 0.00 | 0.00 |
| ATOM | 9127 | CE2  | TYR | 609 | 49.273 | 63.099 | 85.911 | 0.00 | 0.00 |
| ATOM | 9128 | HE2  | TYR | 609 | 49.277 | 62.315 | 86.654 | 0.00 | 0.00 |
| ATOM | 9129 | CD2  | TYR | 609 | 48.550 | 64.381 | 86.022 | 0.00 | 0.00 |
| ATOM | 9130 | HD2  | TYR | 609 | 47.981 | 64.610 | 86.910 | 0.00 | 0.00 |
| ATOM | 9131 | C    | TYR | 609 | 46.750 | 66.667 | 82.942 | 0.00 | 0.00 |
| ATOM | 9132 | O    | TYR | 609 | 47.373 | 67.376 | 82.118 | 0.00 | 0.00 |
| ATOM | 9133 | N    | THR | 610 | 46.095 | 65.582 | 82.582 | 0.00 | 0.00 |
| ATOM | 9134 | H    | THR | 610 | 45.824 | 64.952 | 83.323 | 0.00 | 0.00 |
| ATOM | 9135 | CA   | THR | 610 | 45.994 | 65.222 | 81.161 | 0.00 | 0.00 |
| ATOM | 9136 | HA   | THR | 610 | 46.920 | 65.583 | 80.714 | 0.00 | 0.00 |
| ATOM | 9137 | CB   | THR | 610 | 45.960 | 63.722 | 80.817 | 0.00 | 0.00 |
| ATOM | 9138 | HB   | THR | 610 | 46.073 | 63.657 | 79.735 | 0.00 | 0.00 |
| ATOM | 9139 | CG2  | THR | 610 | 47.288 | 63.210 | 81.262 | 0.00 | 0.00 |
| ATOM | 9140 | 1HG2 | THR | 610 | 47.281 | 62.193 | 80.871 | 0.00 | 0.00 |
| ATOM | 9141 | 2HG2 | THR | 610 | 48.136 | 63.776 | 80.876 | 0.00 | 0.00 |
| ATOM | 9142 | 3HG2 | THR | 610 | 47.282 | 63.137 | 82.350 | 0.00 | 0.00 |
| ATOM | 9143 | OG1  | THR | 610 | 44.855 | 62.997 | 81.287 | 0.00 | 0.00 |
| ATOM | 9144 | HG1  | THR | 610 | 44.666 | 62.276 | 80.682 | 0.00 | 0.00 |
| ATOM | 9145 | C    | THR | 610 | 44.743 | 65.865 | 80.551 | 0.00 | 0.00 |
| ATOM | 9146 | O    | THR | 610 | 44.629 | 65.733 | 79.328 | 0.00 | 0.00 |
| ATOM | 9147 | N    | ILE | 611 | 43.816 | 66.484 | 81.294 | 0.00 | 0.00 |
| ATOM | 9148 | H    | ILE | 611 | 44.051 | 66.804 | 82.223 | 0.00 | 0.00 |
| ATOM | 9149 | CA   | ILE | 611 | 42.522 | 67.030 | 80.691 | 0.00 | 0.00 |
| ATOM | 9150 | HA   | ILE | 611 | 42.618 | 67.273 | 79.633 | 0.00 | 0.00 |

|      |      |      |     |     |        |        |        |      |      |
|------|------|------|-----|-----|--------|--------|--------|------|------|
| ATOM | 9151 | CB   | ILE | 611 | 41.567 | 65.800 | 80.661 | 0.00 | 0.00 |
| ATOM | 9152 | HB   | ILE | 611 | 41.968 | 65.028 | 80.005 | 0.00 | 0.00 |
| ATOM | 9153 | CG2  | ILE | 611 | 41.273 | 65.114 | 81.992 | 0.00 | 0.00 |
| ATOM | 9154 | 1HG2 | ILE | 611 | 42.201 | 64.941 | 82.536 | 0.00 | 0.00 |
| ATOM | 9155 | 2HG2 | ILE | 611 | 40.635 | 65.746 | 82.610 | 0.00 | 0.00 |
| ATOM | 9156 | 3HG2 | ILE | 611 | 40.807 | 64.162 | 81.737 | 0.00 | 0.00 |
| ATOM | 9157 | CG1  | ILE | 611 | 40.209 | 66.210 | 80.067 | 0.00 | 0.00 |
| ATOM | 9158 | 2HG1 | ILE | 611 | 39.528 | 65.363 | 79.980 | 0.00 | 0.00 |
| ATOM | 9159 | 3HG1 | ILE | 611 | 39.636 | 66.827 | 80.758 | 0.00 | 0.00 |
| ATOM | 9160 | CD1  | ILE | 611 | 40.190 | 66.945 | 78.761 | 0.00 | 0.00 |
| ATOM | 9161 | 1HD1 | ILE | 611 | 40.772 | 67.866 | 78.773 | 0.00 | 0.00 |
| ATOM | 9162 | 2HD1 | ILE | 611 | 40.691 | 66.235 | 78.102 | 0.00 | 0.00 |
| ATOM | 9163 | 3HD1 | ILE | 611 | 39.142 | 67.090 | 78.500 | 0.00 | 0.00 |
| ATOM | 9164 | C    | ILE | 611 | 42.041 | 68.225 | 81.545 | 0.00 | 0.00 |
| ATOM | 9165 | O    | ILE | 611 | 41.729 | 69.215 | 80.924 | 0.00 | 0.00 |
| ATOM | 9166 | N    | ASN | 612 | 41.874 | 68.144 | 82.855 | 0.00 | 0.00 |
| ATOM | 9167 | H    | ASN | 612 | 41.931 | 67.257 | 83.335 | 0.00 | 0.00 |
| ATOM | 9168 | CA   | ASN | 612 | 41.164 | 69.210 | 83.574 | 0.00 | 0.00 |
| ATOM | 9169 | HA   | ASN | 612 | 40.164 | 69.330 | 83.158 | 0.00 | 0.00 |
| ATOM | 9170 | CB   | ASN | 612 | 41.060 | 68.809 | 85.044 | 0.00 | 0.00 |
| ATOM | 9171 | HB2  | ASN | 612 | 42.017 | 68.551 | 85.496 | 0.00 | 0.00 |
| ATOM | 9172 | HB3  | ASN | 612 | 40.632 | 69.628 | 85.622 | 0.00 | 0.00 |
| ATOM | 9173 | CG   | ASN | 612 | 40.152 | 67.639 | 85.178 | 0.00 | 0.00 |
| ATOM | 9174 | OD1  | ASN | 612 | 39.392 | 67.240 | 84.278 | 0.00 | 0.00 |
| ATOM | 9175 | ND2  | ASN | 612 | 40.059 | 66.920 | 86.295 | 0.00 | 0.00 |
| ATOM | 9176 | 1HD2 | ASN | 612 | 39.554 | 66.047 | 86.248 | 0.00 | 0.00 |

|      |      |      |     |     |        |        |        |      |      |
|------|------|------|-----|-----|--------|--------|--------|------|------|
| ATOM | 9177 | 2HD2 | ASN | 612 | 40.474 | 67.275 | 87.144 | 0.00 | 0.00 |
| ATOM | 9178 | C    | ASN | 612 | 41.725 | 70.628 | 83.450 | 0.00 | 0.00 |
| ATOM | 9179 | O    | ASN | 612 | 40.919 | 71.538 | 83.204 | 0.00 | 0.00 |
| ATOM | 9180 | N    | PRO | 613 | 43.076 | 70.847 | 83.366 | 0.00 | 0.00 |
| ATOM | 9181 | CD   | PRO | 613 | 44.093 | 69.914 | 83.725 | 0.00 | 0.00 |
| ATOM | 9182 | HD2  | PRO | 613 | 44.346 | 69.213 | 82.930 | 0.00 | 0.00 |
| ATOM | 9183 | HD3  | PRO | 613 | 43.783 | 69.352 | 84.605 | 0.00 | 0.00 |
| ATOM | 9184 | CG   | PRO | 613 | 45.276 | 70.670 | 84.176 | 0.00 | 0.00 |
| ATOM | 9185 | HG2  | PRO | 613 | 44.976 | 71.026 | 85.162 | 0.00 | 0.00 |
| ATOM | 9186 | HG3  | PRO | 613 | 46.220 | 70.126 | 84.147 | 0.00 | 0.00 |
| ATOM | 9187 | CB   | PRO | 613 | 45.403 | 71.919 | 83.282 | 0.00 | 0.00 |
| ATOM | 9188 | HB2  | PRO | 613 | 45.878 | 72.756 | 83.793 | 0.00 | 0.00 |
| ATOM | 9189 | HB3  | PRO | 613 | 45.847 | 71.612 | 82.335 | 0.00 | 0.00 |
| ATOM | 9190 | CA   | PRO | 613 | 43.791 | 72.161 | 83.118 | 0.00 | 0.00 |
| ATOM | 9191 | HA   | PRO | 613 | 43.402 | 72.917 | 83.800 | 0.00 | 0.00 |
| ATOM | 9192 | C    | PRO | 613 | 43.371 | 72.714 | 81.659 | 0.00 | 0.00 |
| ATOM | 9193 | O    | PRO | 613 | 43.044 | 73.916 | 81.433 | 0.00 | 0.00 |
| ATOM | 9194 | N    | ALA | 614 | 43.310 | 71.792 | 80.666 | 0.00 | 0.00 |
| ATOM | 9195 | H    | ALA | 614 | 43.465 | 70.831 | 80.935 | 0.00 | 0.00 |
| ATOM | 9196 | CA   | ALA | 614 | 42.951 | 72.060 | 79.285 | 0.00 | 0.00 |
| ATOM | 9197 | HA   | ALA | 614 | 43.400 | 73.012 | 79.004 | 0.00 | 0.00 |
| ATOM | 9198 | CB   | ALA | 614 | 43.488 | 70.870 | 78.424 | 0.00 | 0.00 |
| ATOM | 9199 | HB1  | ALA | 614 | 42.928 | 69.970 | 78.681 | 0.00 | 0.00 |
| ATOM | 9200 | HB2  | ALA | 614 | 43.505 | 70.991 | 77.341 | 0.00 | 0.00 |
| ATOM | 9201 | HB3  | ALA | 614 | 44.451 | 70.500 | 78.775 | 0.00 | 0.00 |
| ATOM | 9202 | C    | ALA | 614 | 41.507 | 72.319 | 79.082 | 0.00 | 0.00 |

|      |      |      |     |     |        |        |        |      |      |
|------|------|------|-----|-----|--------|--------|--------|------|------|
| ATOM | 9203 | O    | ALA | 614 | 41.174 | 73.008 | 78.112 | 0.00 | 0.00 |
| ATOM | 9204 | N    | LEU | 615 | 40.646 | 71.872 | 80.021 | 0.00 | 0.00 |
| ATOM | 9205 | H    | LEU | 615 | 40.876 | 71.127 | 80.663 | 0.00 | 0.00 |
| ATOM | 9206 | CA   | LEU | 615 | 39.199 | 72.314 | 80.109 | 0.00 | 0.00 |
| ATOM | 9207 | HA   | LEU | 615 | 38.713 | 72.322 | 79.134 | 0.00 | 0.00 |
| ATOM | 9208 | CB   | LEU | 615 | 38.415 | 71.287 | 80.997 | 0.00 | 0.00 |
| ATOM | 9209 | HB2  | LEU | 615 | 38.917 | 71.151 | 81.954 | 0.00 | 0.00 |
| ATOM | 9210 | HB3  | LEU | 615 | 37.456 | 71.792 | 81.119 | 0.00 | 0.00 |
| ATOM | 9211 | CG   | LEU | 615 | 38.182 | 69.878 | 80.302 | 0.00 | 0.00 |
| ATOM | 9212 | HG   | LEU | 615 | 39.133 | 69.378 | 80.119 | 0.00 | 0.00 |
| ATOM | 9213 | CD1  | LEU | 615 | 37.527 | 68.962 | 81.347 | 0.00 | 0.00 |
| ATOM | 9214 | 1HD1 | LEU | 615 | 38.145 | 68.855 | 82.238 | 0.00 | 0.00 |
| ATOM | 9215 | 2HD1 | LEU | 615 | 36.562 | 69.398 | 81.603 | 0.00 | 0.00 |
| ATOM | 9216 | 3HD1 | LEU | 615 | 37.471 | 67.966 | 80.909 | 0.00 | 0.00 |
| ATOM | 9217 | CD2  | LEU | 615 | 37.379 | 69.946 | 79.046 | 0.00 | 0.00 |
| ATOM | 9218 | 1HD2 | LEU | 615 | 37.849 | 70.585 | 78.299 | 0.00 | 0.00 |
| ATOM | 9219 | 2HD2 | LEU | 615 | 37.148 | 69.022 | 78.516 | 0.00 | 0.00 |
| ATOM | 9220 | 3HD2 | LEU | 615 | 36.348 | 70.252 | 79.227 | 0.00 | 0.00 |
| ATOM | 9221 | C    | LEU | 615 | 39.103 | 73.682 | 80.748 | 0.00 | 0.00 |
| ATOM | 9222 | O    | LEU | 615 | 38.266 | 74.498 | 80.321 | 0.00 | 0.00 |
| ATOM | 9223 | N    | THR | 616 | 39.988 | 73.969 | 81.727 | 0.00 | 0.00 |
| ATOM | 9224 | H    | THR | 616 | 40.689 | 73.292 | 81.995 | 0.00 | 0.00 |
| ATOM | 9225 | CA   | THR | 616 | 39.944 | 75.348 | 82.456 | 0.00 | 0.00 |
| ATOM | 9226 | HA   | THR | 616 | 38.887 | 75.560 | 82.619 | 0.00 | 0.00 |
| ATOM | 9227 | CB   | THR | 616 | 40.623 | 75.270 | 83.821 | 0.00 | 0.00 |
| ATOM | 9228 | HB   | THR | 616 | 41.670 | 75.170 | 83.535 | 0.00 | 0.00 |

|      |      |      |     |     |        |        |        |      |      |
|------|------|------|-----|-----|--------|--------|--------|------|------|
| ATOM | 9229 | CG2  | THR | 616 | 40.386 | 76.590 | 84.531 | 0.00 | 0.00 |
| ATOM | 9230 | 1HG2 | THR | 616 | 40.700 | 76.424 | 85.562 | 0.00 | 0.00 |
| ATOM | 9231 | 2HG2 | THR | 616 | 40.958 | 77.339 | 83.984 | 0.00 | 0.00 |
| ATOM | 9232 | 3HG2 | THR | 616 | 39.318 | 76.793 | 84.613 | 0.00 | 0.00 |
| ATOM | 9233 | OG1  | THR | 616 | 40.245 | 74.134 | 84.678 | 0.00 | 0.00 |
| ATOM | 9234 | HG1  | THR | 616 | 40.476 | 73.333 | 84.202 | 0.00 | 0.00 |
| ATOM | 9235 | C    | THR | 616 | 40.393 | 76.518 | 81.536 | 0.00 | 0.00 |
| ATOM | 9236 | O    | THR | 616 | 39.706 | 77.512 | 81.581 | 0.00 | 0.00 |
| ATOM | 9237 | N    | HID | 617 | 41.366 | 76.254 | 80.667 | 0.00 | 0.00 |
| ATOM | 9238 | H    | HID | 617 | 41.806 | 75.345 | 80.673 | 0.00 | 0.00 |
| ATOM | 9239 | CA   | HID | 617 | 41.856 | 77.286 | 79.740 | 0.00 | 0.00 |
| ATOM | 9240 | HA   | HID | 617 | 41.264 | 78.189 | 79.884 | 0.00 | 0.00 |
| ATOM | 9241 | CB   | HID | 617 | 43.379 | 77.456 | 80.047 | 0.00 | 0.00 |
| ATOM | 9242 | HB2  | HID | 617 | 44.007 | 76.585 | 79.856 | 0.00 | 0.00 |
| ATOM | 9243 | HB3  | HID | 617 | 43.702 | 78.211 | 79.330 | 0.00 | 0.00 |
| ATOM | 9244 | CG   | HID | 617 | 43.575 | 78.043 | 81.389 | 0.00 | 0.00 |
| ATOM | 9245 | ND1  | HID | 617 | 43.749 | 79.384 | 81.657 | 0.00 | 0.00 |
| ATOM | 9246 | HD1  | HID | 617 | 43.966 | 80.100 | 80.978 | 0.00 | 0.00 |
| ATOM | 9247 | CE1  | HID | 617 | 43.689 | 79.546 | 82.996 | 0.00 | 0.00 |
| ATOM | 9248 | HE1  | HID | 617 | 43.856 | 80.473 | 83.524 | 0.00 | 0.00 |
| ATOM | 9249 | NE2  | HID | 617 | 43.712 | 78.380 | 83.630 | 0.00 | 0.00 |
| ATOM | 9250 | CD2  | HID | 617 | 43.560 | 77.433 | 82.641 | 0.00 | 0.00 |
| ATOM | 9251 | HD2  | HID | 617 | 43.326 | 76.384 | 82.747 | 0.00 | 0.00 |
| ATOM | 9252 | C    | HID | 617 | 41.509 | 77.021 | 78.238 | 0.00 | 0.00 |
| ATOM | 9253 | O    | HID | 617 | 42.090 | 77.614 | 77.345 | 0.00 | 0.00 |
| ATOM | 9254 | N    | GLY | 618 | 40.536 | 76.128 | 78.080 | 0.00 | 0.00 |

|      |      |      |     |     |        |        |        |      |      |
|------|------|------|-----|-----|--------|--------|--------|------|------|
| ATOM | 9255 | H    | GLY | 618 | 40.091 | 75.740 | 78.900 | 0.00 | 0.00 |
| ATOM | 9256 | CA   | GLY | 618 | 39.779 | 76.089 | 76.814 | 0.00 | 0.00 |
| ATOM | 9257 | HA2  | GLY | 618 | 38.972 | 75.393 | 77.045 | 0.00 | 0.00 |
| ATOM | 9258 | HA3  | GLY | 618 | 39.268 | 77.036 | 76.641 | 0.00 | 0.00 |
| ATOM | 9259 | C    | GLY | 618 | 40.584 | 75.621 | 75.596 | 0.00 | 0.00 |
| ATOM | 9260 | O    | GLY | 618 | 40.504 | 76.233 | 74.521 | 0.00 | 0.00 |
| ATOM | 9261 | N    | ILE | 619 | 41.409 | 74.561 | 75.798 | 0.00 | 0.00 |
| ATOM | 9262 | H    | ILE | 619 | 41.414 | 74.201 | 76.742 | 0.00 | 0.00 |
| ATOM | 9263 | CA   | ILE | 619 | 42.253 | 73.963 | 74.722 | 0.00 | 0.00 |
| ATOM | 9264 | HA   | ILE | 619 | 41.844 | 74.267 | 73.758 | 0.00 | 0.00 |
| ATOM | 9265 | CB   | ILE | 619 | 43.661 | 74.480 | 74.678 | 0.00 | 0.00 |
| ATOM | 9266 | HB   | ILE | 619 | 44.072 | 74.047 | 73.767 | 0.00 | 0.00 |
| ATOM | 9267 | CG2  | ILE | 619 | 43.678 | 75.980 | 74.491 | 0.00 | 0.00 |
| ATOM | 9268 | 1HG2 | ILE | 619 | 44.683 | 76.287 | 74.202 | 0.00 | 0.00 |
| ATOM | 9269 | 2HG2 | ILE | 619 | 42.985 | 76.221 | 73.685 | 0.00 | 0.00 |
| ATOM | 9270 | 3HG2 | ILE | 619 | 43.351 | 76.387 | 75.448 | 0.00 | 0.00 |
| ATOM | 9271 | CG1  | ILE | 619 | 44.422 | 74.029 | 75.931 | 0.00 | 0.00 |
| ATOM | 9272 | 2HG1 | ILE | 619 | 44.251 | 72.952 | 75.938 | 0.00 | 0.00 |
| ATOM | 9273 | 3HG1 | ILE | 619 | 45.450 | 73.934 | 75.583 | 0.00 | 0.00 |
| ATOM | 9274 | CD1  | ILE | 619 | 44.313 | 74.691 | 77.257 | 0.00 | 0.00 |
| ATOM | 9275 | 1HD1 | ILE | 619 | 44.687 | 75.711 | 77.342 | 0.00 | 0.00 |
| ATOM | 9276 | 2HD1 | ILE | 619 | 43.261 | 74.701 | 77.539 | 0.00 | 0.00 |
| ATOM | 9277 | 3HD1 | ILE | 619 | 44.930 | 74.132 | 77.961 | 0.00 | 0.00 |
| ATOM | 9278 | C    | ILE | 619 | 42.158 | 72.451 | 74.491 | 0.00 | 0.00 |
| ATOM | 9279 | O    | ILE | 619 | 42.661 | 71.871 | 73.528 | 0.00 | 0.00 |
| ATOM | 9280 | N    | ALA | 620 | 41.353 | 71.768 | 75.313 | 0.00 | 0.00 |



|      |      |     |     |     |        |        |        |      |      |
|------|------|-----|-----|-----|--------|--------|--------|------|------|
| ATOM | 9281 | H   | ALA | 620 | 40.985 | 72.228 | 76.133 | 0.00 | 0.00 |
| ATOM | 9282 | CA  | ALA | 620 | 41.216 | 70.290 | 75.165 | 0.00 | 0.00 |
| ATOM | 9283 | HA  | ALA | 620 | 42.252 | 69.952 | 75.205 | 0.00 | 0.00 |
| ATOM | 9284 | CB  | ALA | 620 | 40.336 | 69.803 | 76.395 | 0.00 | 0.00 |
| ATOM | 9285 | HB1 | ALA | 620 | 39.352 | 70.269 | 76.447 | 0.00 | 0.00 |
| ATOM | 9286 | HB2 | ALA | 620 | 40.396 | 68.716 | 76.359 | 0.00 | 0.00 |
| ATOM | 9287 | HB3 | ALA | 620 | 40.900 | 70.070 | 77.290 | 0.00 | 0.00 |
| ATOM | 9288 | C   | ALA | 620 | 40.521 | 69.771 | 73.874 | 0.00 | 0.00 |
| ATOM | 9289 | O   | ALA | 620 | 40.535 | 68.555 | 73.655 | 0.00 | 0.00 |
| ATOM | 9290 | N   | HIE | 621 | 40.043 | 70.689 | 73.032 | 0.00 | 0.00 |
| ATOM | 9291 | H   | HIE | 621 | 40.167 | 71.648 | 73.322 | 0.00 | 0.00 |
| ATOM | 9292 | CA  | HIE | 621 | 39.502 | 70.289 | 71.712 | 0.00 | 0.00 |
| ATOM | 9293 | HA  | HIE | 621 | 38.832 | 69.433 | 71.787 | 0.00 | 0.00 |
| ATOM | 9294 | CB  | HIE | 621 | 38.629 | 71.456 | 71.256 | 0.00 | 0.00 |
| ATOM | 9295 | HB2 | HIE | 621 | 38.032 | 71.229 | 70.373 | 0.00 | 0.00 |
| ATOM | 9296 | HB3 | HIE | 621 | 37.849 | 71.504 | 72.015 | 0.00 | 0.00 |
| ATOM | 9297 | CG  | HIE | 621 | 39.285 | 72.771 | 71.111 | 0.00 | 0.00 |
| ATOM | 9298 | ND1 | HIE | 621 | 39.323 | 73.744 | 72.122 | 0.00 | 0.00 |
| ATOM | 9299 | CE1 | HIE | 621 | 40.123 | 74.706 | 71.554 | 0.00 | 0.00 |
| ATOM | 9300 | HE1 | HIE | 621 | 40.422 | 75.606 | 72.069 | 0.00 | 0.00 |
| ATOM | 9301 | NE2 | HIE | 621 | 40.498 | 74.478 | 70.340 | 0.00 | 0.00 |
| ATOM | 9302 | HE2 | HIE | 621 | 41.062 | 75.115 | 69.796 | 0.00 | 0.00 |
| ATOM | 9303 | CD2 | HIE | 621 | 39.969 | 73.230 | 70.000 | 0.00 | 0.00 |
| ATOM | 9304 | HD2 | HIE | 621 | 40.053 | 72.765 | 69.029 | 0.00 | 0.00 |
| ATOM | 9305 | C   | HIE | 621 | 40.603 | 70.049 | 70.660 | 0.00 | 0.00 |
| ATOM | 9306 | O   | HIE | 621 | 40.298 | 69.618 | 69.599 | 0.00 | 0.00 |

|      |      |      |     |     |        |        |        |      |      |
|------|------|------|-----|-----|--------|--------|--------|------|------|
| ATOM | 9307 | N    | GLU | 622 | 41.878 | 70.183 | 71.027 | 0.00 | 0.00 |
| ATOM | 9308 | H    | GLU | 622 | 42.154 | 70.448 | 71.962 | 0.00 | 0.00 |
| ATOM | 9309 | CA   | GLU | 622 | 43.039 | 69.917 | 70.131 | 0.00 | 0.00 |
| ATOM | 9310 | HA   | GLU | 622 | 42.657 | 69.492 | 69.203 | 0.00 | 0.00 |
| ATOM | 9311 | CB   | GLU | 622 | 43.646 | 71.276 | 69.683 | 0.00 | 0.00 |
| ATOM | 9312 | HB2  | GLU | 622 | 43.572 | 72.057 | 70.439 | 0.00 | 0.00 |
| ATOM | 9313 | HB3  | GLU | 622 | 44.721 | 71.265 | 69.501 | 0.00 | 0.00 |
| ATOM | 9314 | CG   | GLU | 622 | 43.015 | 71.763 | 68.381 | 0.00 | 0.00 |
| ATOM | 9315 | HG2  | GLU | 622 | 41.932 | 71.673 | 68.470 | 0.00 | 0.00 |
| ATOM | 9316 | HG3  | GLU | 622 | 43.245 | 72.810 | 68.184 | 0.00 | 0.00 |
| ATOM | 9317 | CD   | GLU | 622 | 43.420 | 70.993 | 67.152 | 0.00 | 0.00 |
| ATOM | 9318 | OE1  | GLU | 622 | 42.667 | 70.029 | 66.859 | 0.00 | 0.00 |
| ATOM | 9319 | OE2  | GLU | 622 | 44.451 | 71.248 | 66.482 | 0.00 | 0.00 |
| ATOM | 9320 | C    | GLU | 622 | 44.187 | 69.134 | 70.668 | 0.00 | 0.00 |
| ATOM | 9321 | O    | GLU | 622 | 44.838 | 68.453 | 69.888 | 0.00 | 0.00 |
| ATOM | 9322 | N    | VAL | 623 | 44.379 | 69.132 | 71.996 | 0.00 | 0.00 |
| ATOM | 9323 | H    | VAL | 623 | 43.779 | 69.695 | 72.582 | 0.00 | 0.00 |
| ATOM | 9324 | CA   | VAL | 623 | 45.371 | 68.244 | 72.659 | 0.00 | 0.00 |
| ATOM | 9325 | HA   | VAL | 623 | 45.434 | 67.284 | 72.145 | 0.00 | 0.00 |
| ATOM | 9326 | CB   | VAL | 623 | 46.792 | 68.838 | 72.537 | 0.00 | 0.00 |
| ATOM | 9327 | HB   | VAL | 623 | 46.868 | 69.276 | 71.542 | 0.00 | 0.00 |
| ATOM | 9328 | CG1  | VAL | 623 | 47.061 | 70.077 | 73.477 | 0.00 | 0.00 |
| ATOM | 9329 | 1HG1 | VAL | 623 | 47.461 | 69.732 | 74.431 | 0.00 | 0.00 |
| ATOM | 9330 | 2HG1 | VAL | 623 | 47.666 | 70.871 | 73.040 | 0.00 | 0.00 |
| ATOM | 9331 | 3HG1 | VAL | 623 | 46.063 | 70.440 | 73.721 | 0.00 | 0.00 |
| ATOM | 9332 | CG2  | VAL | 623 | 47.874 | 67.773 | 72.709 | 0.00 | 0.00 |

|      |      |      |     |     |        |        |        |      |      |
|------|------|------|-----|-----|--------|--------|--------|------|------|
| ATOM | 9333 | 1HG2 | VAL | 623 | 48.818 | 68.209 | 72.383 | 0.00 | 0.00 |
| ATOM | 9334 | 2HG2 | VAL | 623 | 47.881 | 67.272 | 73.678 | 0.00 | 0.00 |
| ATOM | 9335 | 3HG2 | VAL | 623 | 47.746 | 67.019 | 71.932 | 0.00 | 0.00 |
| ATOM | 9336 | C    | VAL | 623 | 44.940 | 67.875 | 74.099 | 0.00 | 0.00 |
| ATOM | 9337 | O    | VAL | 623 | 44.321 | 68.697 | 74.787 | 0.00 | 0.00 |
| ATOM | 9338 | N    | GLY | 624 | 45.405 | 66.699 | 74.619 | 0.00 | 0.00 |
| ATOM | 9339 | H    | GLY | 624 | 45.845 | 66.043 | 73.989 | 0.00 | 0.00 |
| ATOM | 9340 | CA   | GLY | 624 | 45.132 | 66.239 | 75.976 | 0.00 | 0.00 |
| ATOM | 9341 | HA2  | GLY | 624 | 46.051 | 65.716 | 76.242 | 0.00 | 0.00 |
| ATOM | 9342 | HA3  | GLY | 624 | 44.878 | 67.003 | 76.711 | 0.00 | 0.00 |
| ATOM | 9343 | C    | GLY | 624 | 43.982 | 65.195 | 76.011 | 0.00 | 0.00 |
| ATOM | 9344 | O    | GLY | 624 | 42.995 | 65.400 | 75.317 | 0.00 | 0.00 |
| ATOM | 9345 | N    | SER | 625 | 44.168 | 64.147 | 76.812 | 0.00 | 0.00 |
| ATOM | 9346 | H    | SER | 625 | 44.644 | 64.431 | 77.656 | 0.00 | 0.00 |
| ATOM | 9347 | CA   | SER | 625 | 43.624 | 62.753 | 76.668 | 0.00 | 0.00 |
| ATOM | 9348 | HA   | SER | 625 | 43.935 | 62.167 | 77.533 | 0.00 | 0.00 |
| ATOM | 9349 | CB   | SER | 625 | 42.151 | 62.740 | 76.426 | 0.00 | 0.00 |
| ATOM | 9350 | HB2  | SER | 625 | 41.632 | 63.262 | 77.231 | 0.00 | 0.00 |
| ATOM | 9351 | HB3  | SER | 625 | 41.937 | 63.241 | 75.483 | 0.00 | 0.00 |
| ATOM | 9352 | OG   | SER | 625 | 41.604 | 61.449 | 76.623 | 0.00 | 0.00 |
| ATOM | 9353 | HG   | SER | 625 | 42.185 | 60.968 | 77.218 | 0.00 | 0.00 |
| ATOM | 9354 | C    | SER | 625 | 44.261 | 62.060 | 75.427 | 0.00 | 0.00 |
| ATOM | 9355 | O    | SER | 625 | 44.492 | 62.697 | 74.418 | 0.00 | 0.00 |
| ATOM | 9356 | N    | ILE | 626 | 44.472 | 60.759 | 75.481 | 0.00 | 0.00 |
| ATOM | 9357 | H    | ILE | 626 | 44.131 | 60.322 | 76.325 | 0.00 | 0.00 |
| ATOM | 9358 | CA   | ILE | 626 | 44.592 | 59.918 | 74.263 | 0.00 | 0.00 |

|      |      |      |     |     |        |        |        |      |      |
|------|------|------|-----|-----|--------|--------|--------|------|------|
| ATOM | 9359 | HA   | ILE | 626 | 45.261 | 60.410 | 73.557 | 0.00 | 0.00 |
| ATOM | 9360 | CB   | ILE | 626 | 45.301 | 58.562 | 74.613 | 0.00 | 0.00 |
| ATOM | 9361 | HB   | ILE | 626 | 44.629 | 57.952 | 75.216 | 0.00 | 0.00 |
| ATOM | 9362 | CG2  | ILE | 626 | 45.569 | 57.844 | 73.231 | 0.00 | 0.00 |
| ATOM | 9363 | 1HG2 | ILE | 626 | 44.631 | 57.792 | 72.679 | 0.00 | 0.00 |
| ATOM | 9364 | 2HG2 | ILE | 626 | 46.317 | 58.370 | 72.638 | 0.00 | 0.00 |
| ATOM | 9365 | 3HG2 | ILE | 626 | 45.876 | 56.824 | 73.463 | 0.00 | 0.00 |
| ATOM | 9366 | CG1  | ILE | 626 | 46.518 | 58.772 | 75.519 | 0.00 | 0.00 |
| ATOM | 9367 | 2HG1 | ILE | 626 | 47.233 | 59.457 | 75.064 | 0.00 | 0.00 |
| ATOM | 9368 | 3HG1 | ILE | 626 | 46.284 | 59.188 | 76.499 | 0.00 | 0.00 |
| ATOM | 9369 | CD1  | ILE | 626 | 47.239 | 57.474 | 75.867 | 0.00 | 0.00 |
| ATOM | 9370 | 1HD1 | ILE | 626 | 46.650 | 56.914 | 76.594 | 0.00 | 0.00 |
| ATOM | 9371 | 2HD1 | ILE | 626 | 47.503 | 56.858 | 75.008 | 0.00 | 0.00 |
| ATOM | 9372 | 3HD1 | ILE | 626 | 48.136 | 57.821 | 76.380 | 0.00 | 0.00 |
| ATOM | 9373 | C    | ILE | 626 | 43.312 | 59.761 | 73.516 | 0.00 | 0.00 |
| ATOM | 9374 | O    | ILE | 626 | 42.462 | 58.945 | 73.950 | 0.00 | 0.00 |
| ATOM | 9375 | N    | GLU | 627 | 42.989 | 60.583 | 72.487 | 0.00 | 0.00 |
| ATOM | 9376 | H    | GLU | 627 | 43.574 | 61.392 | 72.332 | 0.00 | 0.00 |
| ATOM | 9377 | CA   | GLU | 627 | 41.645 | 60.571 | 71.881 | 0.00 | 0.00 |
| ATOM | 9378 | HA   | GLU | 627 | 41.336 | 59.529 | 71.960 | 0.00 | 0.00 |
| ATOM | 9379 | CB   | GLU | 627 | 40.893 | 61.447 | 72.879 | 0.00 | 0.00 |
| ATOM | 9380 | HB2  | GLU | 627 | 40.765 | 60.859 | 73.788 | 0.00 | 0.00 |
| ATOM | 9381 | HB3  | GLU | 627 | 41.320 | 62.445 | 72.973 | 0.00 | 0.00 |
| ATOM | 9382 | CG   | GLU | 627 | 39.456 | 61.974 | 72.375 | 0.00 | 0.00 |
| ATOM | 9383 | HG2  | GLU | 627 | 38.941 | 62.557 | 73.138 | 0.00 | 0.00 |
| ATOM | 9384 | HG3  | GLU | 627 | 39.535 | 62.668 | 71.537 | 0.00 | 0.00 |

|      |      |      |     |     |        |        |        |      |      |
|------|------|------|-----|-----|--------|--------|--------|------|------|
| ATOM | 9385 | CD   | GLU | 627 | 38.497 | 60.883 | 71.981 | 0.00 | 0.00 |
| ATOM | 9386 | OE1  | GLU | 627 | 37.286 | 61.161 | 71.837 | 0.00 | 0.00 |
| ATOM | 9387 | OE2  | GLU | 627 | 38.848 | 59.722 | 72.060 | 0.00 | 0.00 |
| ATOM | 9388 | C    | GLU | 627 | 41.415 | 61.157 | 70.469 | 0.00 | 0.00 |
| ATOM | 9389 | O    | GLU | 627 | 42.185 | 61.970 | 69.948 | 0.00 | 0.00 |
| ATOM | 9390 | N    | VAL | 628 | 40.506 | 60.510 | 69.713 | 0.00 | 0.00 |
| ATOM | 9391 | H    | VAL | 628 | 39.835 | 59.947 | 70.216 | 0.00 | 0.00 |
| ATOM | 9392 | CA   | VAL | 628 | 40.432 | 60.745 | 68.148 | 0.00 | 0.00 |
| ATOM | 9393 | HA   | VAL | 628 | 41.288 | 60.198 | 67.753 | 0.00 | 0.00 |
| ATOM | 9394 | CB   | VAL | 628 | 39.190 | 59.998 | 67.609 | 0.00 | 0.00 |
| ATOM | 9395 | HB   | VAL | 628 | 39.173 | 60.199 | 66.538 | 0.00 | 0.00 |
| ATOM | 9396 | CG1  | VAL | 628 | 39.519 | 58.512 | 67.649 | 0.00 | 0.00 |
| ATOM | 9397 | 1HG1 | VAL | 628 | 39.474 | 58.106 | 68.660 | 0.00 | 0.00 |
| ATOM | 9398 | 2HG1 | VAL | 628 | 38.759 | 57.948 | 67.109 | 0.00 | 0.00 |
| ATOM | 9399 | 3HG1 | VAL | 628 | 40.442 | 58.336 | 67.097 | 0.00 | 0.00 |
| ATOM | 9400 | CG2  | VAL | 628 | 37.867 | 60.339 | 68.307 | 0.00 | 0.00 |
| ATOM | 9401 | 1HG2 | VAL | 628 | 37.774 | 60.087 | 69.363 | 0.00 | 0.00 |
| ATOM | 9402 | 2HG2 | VAL | 628 | 37.763 | 61.423 | 68.261 | 0.00 | 0.00 |
| ATOM | 9403 | 3HG2 | VAL | 628 | 36.982 | 59.799 | 67.968 | 0.00 | 0.00 |
| ATOM | 9404 | C    | VAL | 628 | 40.477 | 62.239 | 67.709 | 0.00 | 0.00 |
| ATOM | 9405 | O    | VAL | 628 | 39.762 | 63.054 | 68.294 | 0.00 | 0.00 |
| ATOM | 9406 | N    | GLY | 629 | 41.174 | 62.547 | 66.622 | 0.00 | 0.00 |
| ATOM | 9407 | H    | GLY | 629 | 41.737 | 61.792 | 66.259 | 0.00 | 0.00 |
| ATOM | 9408 | CA   | GLY | 629 | 41.265 | 63.910 | 66.035 | 0.00 | 0.00 |
| ATOM | 9409 | HA2  | GLY | 629 | 41.601 | 63.934 | 64.998 | 0.00 | 0.00 |
| ATOM | 9410 | HA3  | GLY | 629 | 40.275 | 64.365 | 66.045 | 0.00 | 0.00 |

|      |      |     |     |     |        |        |        |      |      |
|------|------|-----|-----|-----|--------|--------|--------|------|------|
| ATOM | 9411 | C   | GLY | 629 | 42.231 | 64.811 | 66.675 | 0.00 | 0.00 |
| ATOM | 9412 | O   | GLY | 629 | 42.815 | 65.737 | 66.082 | 0.00 | 0.00 |
| ATOM | 9413 | N   | LYS | 630 | 42.474 | 64.585 | 67.965 | 0.00 | 0.00 |
| ATOM | 9414 | H   | LYS | 630 | 41.960 | 63.857 | 68.441 | 0.00 | 0.00 |
| ATOM | 9415 | CA  | LYS | 630 | 43.467 | 65.402 | 68.734 | 0.00 | 0.00 |
| ATOM | 9416 | HA  | LYS | 630 | 43.256 | 66.456 | 68.560 | 0.00 | 0.00 |
| ATOM | 9417 | CB  | LYS | 630 | 43.273 | 65.186 | 70.230 | 0.00 | 0.00 |
| ATOM | 9418 | HB2 | LYS | 630 | 43.292 | 64.100 | 70.316 | 0.00 | 0.00 |
| ATOM | 9419 | HB3 | LYS | 630 | 44.129 | 65.542 | 70.804 | 0.00 | 0.00 |
| ATOM | 9420 | CG  | LYS | 630 | 41.917 | 65.599 | 70.791 | 0.00 | 0.00 |
| ATOM | 9421 | HG2 | LYS | 630 | 41.658 | 66.629 | 70.547 | 0.00 | 0.00 |
| ATOM | 9422 | HG3 | LYS | 630 | 41.177 | 64.903 | 70.395 | 0.00 | 0.00 |
| ATOM | 9423 | CD  | LYS | 630 | 41.865 | 65.478 | 72.365 | 0.00 | 0.00 |
| ATOM | 9424 | HD2 | LYS | 630 | 42.253 | 64.514 | 72.693 | 0.00 | 0.00 |
| ATOM | 9425 | HD3 | LYS | 630 | 42.455 | 66.337 | 72.685 | 0.00 | 0.00 |
| ATOM | 9426 | CE  | LYS | 630 | 40.433 | 65.439 | 72.892 | 0.00 | 0.00 |
| ATOM | 9427 | HE2 | LYS | 630 | 39.895 | 66.219 | 72.353 | 0.00 | 0.00 |
| ATOM | 9428 | HE3 | LYS | 630 | 40.053 | 64.468 | 72.572 | 0.00 | 0.00 |
| ATOM | 9429 | NZ  | LYS | 630 | 40.350 | 65.684 | 74.403 | 0.00 | 0.00 |
| ATOM | 9430 | HZ1 | LYS | 630 | 39.366 | 65.588 | 74.613 | 0.00 | 0.00 |
| ATOM | 9431 | HZ2 | LYS | 630 | 40.898 | 65.021 | 74.932 | 0.00 | 0.00 |
| ATOM | 9432 | HZ3 | LYS | 630 | 40.537 | 66.654 | 74.615 | 0.00 | 0.00 |
| ATOM | 9433 | C   | LYS | 630 | 44.902 | 65.203 | 68.282 | 0.00 | 0.00 |
| ATOM | 9434 | O   | LYS | 630 | 45.209 | 64.199 | 67.685 | 0.00 | 0.00 |
| ATOM | 9435 | N   | LEU | 631 | 45.813 | 66.119 | 68.556 | 0.00 | 0.00 |
| ATOM | 9436 | H   | LEU | 631 | 45.506 | 66.953 | 69.037 | 0.00 | 0.00 |

|      |      |      |     |     |        |        |        |      |      |
|------|------|------|-----|-----|--------|--------|--------|------|------|
| ATOM | 9437 | CA   | LEU | 631 | 47.260 | 66.061 | 68.179 | 0.00 | 0.00 |
| ATOM | 9438 | HA   | LEU | 631 | 47.402 | 65.958 | 67.104 | 0.00 | 0.00 |
| ATOM | 9439 | CB   | LEU | 631 | 47.862 | 67.389 | 68.661 | 0.00 | 0.00 |
| ATOM | 9440 | HB2  | LEU | 631 | 47.376 | 68.282 | 68.269 | 0.00 | 0.00 |
| ATOM | 9441 | HB3  | LEU | 631 | 47.808 | 67.376 | 69.749 | 0.00 | 0.00 |
| ATOM | 9442 | CG   | LEU | 631 | 49.405 | 67.536 | 68.353 | 0.00 | 0.00 |
| ATOM | 9443 | HG   | LEU | 631 | 49.998 | 66.676 | 68.665 | 0.00 | 0.00 |
| ATOM | 9444 | CD1  | LEU | 631 | 49.666 | 67.847 | 66.857 | 0.00 | 0.00 |
| ATOM | 9445 | 1HD1 | LEU | 631 | 48.912 | 68.569 | 66.543 | 0.00 | 0.00 |
| ATOM | 9446 | 2HD1 | LEU | 631 | 50.622 | 68.361 | 66.761 | 0.00 | 0.00 |
| ATOM | 9447 | 3HD1 | LEU | 631 | 49.622 | 66.907 | 66.308 | 0.00 | 0.00 |
| ATOM | 9448 | CD2  | LEU | 631 | 50.061 | 68.743 | 69.133 | 0.00 | 0.00 |
| ATOM | 9449 | 1HD2 | LEU | 631 | 51.140 | 68.591 | 69.156 | 0.00 | 0.00 |
| ATOM | 9450 | 2HD2 | LEU | 631 | 49.884 | 69.608 | 68.495 | 0.00 | 0.00 |
| ATOM | 9451 | 3HD2 | LEU | 631 | 49.623 | 68.841 | 70.127 | 0.00 | 0.00 |
| ATOM | 9452 | C    | LEU | 631 | 47.868 | 64.802 | 68.861 | 0.00 | 0.00 |
| ATOM | 9453 | O    | LEU | 631 | 47.613 | 64.545 | 70.039 | 0.00 | 0.00 |
| ATOM | 9454 | N    | ALA | 632 | 48.689 | 63.975 | 68.172 | 0.00 | 0.00 |
| ATOM | 9455 | H    | ALA | 632 | 48.862 | 64.205 | 67.204 | 0.00 | 0.00 |
| ATOM | 9456 | CA   | ALA | 632 | 49.383 | 62.745 | 68.752 | 0.00 | 0.00 |
| ATOM | 9457 | HA   | ALA | 632 | 48.647 | 62.327 | 69.439 | 0.00 | 0.00 |
| ATOM | 9458 | CB   | ALA | 632 | 49.595 | 61.847 | 67.585 | 0.00 | 0.00 |
| ATOM | 9459 | HB1  | ALA | 632 | 50.409 | 62.297 | 67.016 | 0.00 | 0.00 |
| ATOM | 9460 | HB2  | ALA | 632 | 49.892 | 60.898 | 68.032 | 0.00 | 0.00 |
| ATOM | 9461 | HB3  | ALA | 632 | 48.681 | 61.764 | 66.997 | 0.00 | 0.00 |
| ATOM | 9462 | C    | ALA | 632 | 50.595 | 63.013 | 69.610 | 0.00 | 0.00 |

|      |      |      |     |     |        |        |        |      |      |
|------|------|------|-----|-----|--------|--------|--------|------|------|
| ATOM | 9463 | O    | ALA | 632 | 51.721 | 62.479 | 69.373 | 0.00 | 0.00 |
| ATOM | 9464 | N    | ASP | 633 | 50.332 | 63.861 | 70.625 | 0.00 | 0.00 |
| ATOM | 9465 | H    | ASP | 633 | 49.385 | 64.206 | 70.548 | 0.00 | 0.00 |
| ATOM | 9466 | CA   | ASP | 633 | 51.141 | 64.092 | 71.807 | 0.00 | 0.00 |
| ATOM | 9467 | HA   | ASP | 633 | 52.147 | 64.128 | 71.388 | 0.00 | 0.00 |
| ATOM | 9468 | CB   | ASP | 633 | 50.613 | 65.422 | 72.357 | 0.00 | 0.00 |
| ATOM | 9469 | HB2  | ASP | 633 | 49.587 | 65.653 | 72.071 | 0.00 | 0.00 |
| ATOM | 9470 | HB3  | ASP | 633 | 50.527 | 65.448 | 73.443 | 0.00 | 0.00 |
| ATOM | 9471 | CG   | ASP | 633 | 51.374 | 66.629 | 71.839 | 0.00 | 0.00 |
| ATOM | 9472 | OD1  | ASP | 633 | 51.726 | 66.632 | 70.714 | 0.00 | 0.00 |
| ATOM | 9473 | OD2  | ASP | 633 | 51.525 | 67.673 | 72.553 | 0.00 | 0.00 |
| ATOM | 9474 | C    | ASP | 633 | 50.958 | 62.941 | 72.761 | 0.00 | 0.00 |
| ATOM | 9475 | O    | ASP | 633 | 49.890 | 62.731 | 73.233 | 0.00 | 0.00 |
| ATOM | 9476 | N    | LEU | 634 | 51.995 | 62.174 | 73.103 | 0.00 | 0.00 |
| ATOM | 9477 | H    | LEU | 634 | 52.873 | 62.402 | 72.659 | 0.00 | 0.00 |
| ATOM | 9478 | CA   | LEU | 634 | 52.007 | 60.920 | 73.874 | 0.00 | 0.00 |
| ATOM | 9479 | HA   | LEU | 634 | 51.189 | 60.946 | 74.594 | 0.00 | 0.00 |
| ATOM | 9480 | CB   | LEU | 634 | 51.917 | 59.632 | 73.008 | 0.00 | 0.00 |
| ATOM | 9481 | HB2  | LEU | 634 | 52.793 | 59.599 | 72.360 | 0.00 | 0.00 |
| ATOM | 9482 | HB3  | LEU | 634 | 52.014 | 58.749 | 73.639 | 0.00 | 0.00 |
| ATOM | 9483 | CG   | LEU | 634 | 50.629 | 59.542 | 72.260 | 0.00 | 0.00 |
| ATOM | 9484 | HG   | LEU | 634 | 50.624 | 60.388 | 71.573 | 0.00 | 0.00 |
| ATOM | 9485 | CD1  | LEU | 634 | 50.695 | 58.309 | 71.274 | 0.00 | 0.00 |
| ATOM | 9486 | 1HD1 | LEU | 634 | 49.807 | 58.173 | 70.658 | 0.00 | 0.00 |
| ATOM | 9487 | 2HD1 | LEU | 634 | 51.439 | 58.349 | 70.478 | 0.00 | 0.00 |
| ATOM | 9488 | 3HD1 | LEU | 634 | 50.937 | 57.422 | 71.859 | 0.00 | 0.00 |



|      |      |      |     |     |        |        |        |      |      |
|------|------|------|-----|-----|--------|--------|--------|------|------|
| ATOM | 9489 | CD2  | LEU | 634 | 49.255 | 59.435 | 72.977 | 0.00 | 0.00 |
| ATOM | 9490 | 1HD2 | LEU | 634 | 49.238 | 58.506 | 73.547 | 0.00 | 0.00 |
| ATOM | 9491 | 2HD2 | LEU | 634 | 49.229 | 60.288 | 73.654 | 0.00 | 0.00 |
| ATOM | 9492 | 3HD2 | LEU | 634 | 48.366 | 59.457 | 72.346 | 0.00 | 0.00 |
| ATOM | 9493 | C    | LEU | 634 | 53.214 | 60.816 | 74.830 | 0.00 | 0.00 |
| ATOM | 9494 | O    | LEU | 634 | 54.271 | 61.267 | 74.443 | 0.00 | 0.00 |
| ATOM | 9495 | N    | VAL | 635 | 53.052 | 60.200 | 76.040 | 0.00 | 0.00 |
| ATOM | 9496 | H    | VAL | 635 | 52.166 | 59.844 | 76.370 | 0.00 | 0.00 |
| ATOM | 9497 | CA   | VAL | 635 | 54.207 | 59.822 | 76.861 | 0.00 | 0.00 |
| ATOM | 9498 | HA   | VAL | 635 | 55.087 | 60.008 | 76.246 | 0.00 | 0.00 |
| ATOM | 9499 | CB   | VAL | 635 | 54.441 | 60.591 | 78.180 | 0.00 | 0.00 |
| ATOM | 9500 | HB   | VAL | 635 | 53.627 | 60.299 | 78.844 | 0.00 | 0.00 |
| ATOM | 9501 | CG1  | VAL | 635 | 55.734 | 60.207 | 78.802 | 0.00 | 0.00 |
| ATOM | 9502 | 1HG1 | VAL | 635 | 55.943 | 60.846 | 79.659 | 0.00 | 0.00 |
| ATOM | 9503 | 2HG1 | VAL | 635 | 55.748 | 59.173 | 79.147 | 0.00 | 0.00 |
| ATOM | 9504 | 3HG1 | VAL | 635 | 56.566 | 60.301 | 78.104 | 0.00 | 0.00 |
| ATOM | 9505 | CG2  | VAL | 635 | 54.465 | 62.135 | 77.968 | 0.00 | 0.00 |
| ATOM | 9506 | 1HG2 | VAL | 635 | 54.625 | 62.620 | 78.932 | 0.00 | 0.00 |
| ATOM | 9507 | 2HG2 | VAL | 635 | 55.226 | 62.421 | 77.242 | 0.00 | 0.00 |
| ATOM | 9508 | 3HG2 | VAL | 635 | 53.486 | 62.524 | 77.687 | 0.00 | 0.00 |
| ATOM | 9509 | C    | VAL | 635 | 54.162 | 58.324 | 77.086 | 0.00 | 0.00 |
| ATOM | 9510 | O    | VAL | 635 | 53.158 | 57.749 | 77.483 | 0.00 | 0.00 |
| ATOM | 9511 | N    | VAL | 636 | 55.268 | 57.663 | 76.778 | 0.00 | 0.00 |
| ATOM | 9512 | H    | VAL | 636 | 56.088 | 58.150 | 76.447 | 0.00 | 0.00 |
| ATOM | 9513 | CA   | VAL | 636 | 55.392 | 56.205 | 76.767 | 0.00 | 0.00 |
| ATOM | 9514 | HA   | VAL | 636 | 54.424 | 55.769 | 77.015 | 0.00 | 0.00 |

|      |      |      |     |     |        |        |        |      |      |
|------|------|------|-----|-----|--------|--------|--------|------|------|
| ATOM | 9515 | CB   | VAL | 636 | 55.885 | 55.745 | 75.368 | 0.00 | 0.00 |
| ATOM | 9516 | HB   | VAL | 636 | 56.903 | 56.112 | 75.237 | 0.00 | 0.00 |
| ATOM | 9517 | CG1  | VAL | 636 | 55.918 | 54.237 | 75.205 | 0.00 | 0.00 |
| ATOM | 9518 | 1HG1 | VAL | 636 | 56.201 | 53.996 | 74.181 | 0.00 | 0.00 |
| ATOM | 9519 | 2HG1 | VAL | 636 | 56.742 | 53.843 | 75.801 | 0.00 | 0.00 |
| ATOM | 9520 | 3HG1 | VAL | 636 | 54.911 | 53.933 | 75.490 | 0.00 | 0.00 |
| ATOM | 9521 | CG2  | VAL | 636 | 55.164 | 56.423 | 74.142 | 0.00 | 0.00 |
| ATOM | 9522 | 1HG2 | VAL | 636 | 54.076 | 56.400 | 74.203 | 0.00 | 0.00 |
| ATOM | 9523 | 2HG2 | VAL | 636 | 55.522 | 57.442 | 73.998 | 0.00 | 0.00 |
| ATOM | 9524 | 3HG2 | VAL | 636 | 55.478 | 55.973 | 73.200 | 0.00 | 0.00 |
| ATOM | 9525 | C    | VAL | 636 | 56.261 | 55.756 | 77.866 | 0.00 | 0.00 |
| ATOM | 9526 | O    | VAL | 636 | 57.474 | 56.105 | 77.941 | 0.00 | 0.00 |
| ATOM | 9527 | N    | TRP | 637 | 55.753 | 54.895 | 78.763 | 0.00 | 0.00 |
| ATOM | 9528 | H    | TRP | 637 | 54.808 | 54.561 | 78.636 | 0.00 | 0.00 |
| ATOM | 9529 | CA   | TRP | 637 | 56.317 | 54.620 | 80.075 | 0.00 | 0.00 |
| ATOM | 9530 | HA   | TRP | 637 | 57.356 | 54.932 | 80.180 | 0.00 | 0.00 |
| ATOM | 9531 | CB   | TRP | 637 | 55.575 | 55.046 | 81.322 | 0.00 | 0.00 |
| ATOM | 9532 | HB2  | TRP | 637 | 54.756 | 54.349 | 81.498 | 0.00 | 0.00 |
| ATOM | 9533 | HB3  | TRP | 637 | 56.306 | 54.951 | 82.125 | 0.00 | 0.00 |
| ATOM | 9534 | CG   | TRP | 637 | 55.039 | 56.485 | 81.323 | 0.00 | 0.00 |
| ATOM | 9535 | CD1  | TRP | 637 | 54.079 | 57.001 | 80.607 | 0.00 | 0.00 |
| ATOM | 9536 | HD1  | TRP | 637 | 53.409 | 56.450 | 79.963 | 0.00 | 0.00 |
| ATOM | 9537 | NE1  | TRP | 637 | 53.867 | 58.355 | 80.987 | 0.00 | 0.00 |
| ATOM | 9538 | HE1  | TRP | 637 | 52.997 | 58.818 | 80.766 | 0.00 | 0.00 |
| ATOM | 9539 | CE2  | TRP | 637 | 54.823 | 58.734 | 81.877 | 0.00 | 0.00 |
| ATOM | 9540 | CZ2  | TRP | 637 | 55.102 | 59.936 | 82.465 | 0.00 | 0.00 |

|      |      |     |     |     |        |        |        |      |      |
|------|------|-----|-----|-----|--------|--------|--------|------|------|
| ATOM | 9541 | HZ2 | TRP | 637 | 54.527 | 60.812 | 82.201 | 0.00 | 0.00 |
| ATOM | 9542 | CH2 | TRP | 637 | 56.068 | 60.068 | 83.444 | 0.00 | 0.00 |
| ATOM | 9543 | HH2 | TRP | 637 | 56.257 | 61.041 | 83.871 | 0.00 | 0.00 |
| ATOM | 9544 | CZ3 | TRP | 637 | 56.828 | 58.906 | 83.739 | 0.00 | 0.00 |
| ATOM | 9545 | HZ3 | TRP | 637 | 57.653 | 58.977 | 84.432 | 0.00 | 0.00 |
| ATOM | 9546 | CE3 | TRP | 637 | 56.617 | 57.674 | 83.055 | 0.00 | 0.00 |
| ATOM | 9547 | HE3 | TRP | 637 | 57.187 | 56.765 | 83.184 | 0.00 | 0.00 |
| ATOM | 9548 | CD2 | TRP | 637 | 55.515 | 57.537 | 82.213 | 0.00 | 0.00 |
| ATOM | 9549 | C   | TRP | 637 | 56.448 | 53.085 | 80.138 | 0.00 | 0.00 |
| ATOM | 9550 | O   | TRP | 637 | 55.520 | 52.433 | 79.659 | 0.00 | 0.00 |
| ATOM | 9551 | N   | SER | 638 | 57.507 | 52.562 | 80.686 | 0.00 | 0.00 |
| ATOM | 9552 | H   | SER | 638 | 58.202 | 53.183 | 81.076 | 0.00 | 0.00 |
| ATOM | 9553 | CA  | SER | 638 | 57.556 | 51.193 | 81.229 | 0.00 | 0.00 |
| ATOM | 9554 | HA  | SER | 638 | 56.932 | 50.629 | 80.536 | 0.00 | 0.00 |
| ATOM | 9555 | CB  | SER | 638 | 58.919 | 50.537 | 81.274 | 0.00 | 0.00 |
| ATOM | 9556 | HB2 | SER | 638 | 59.510 | 51.153 | 81.952 | 0.00 | 0.00 |
| ATOM | 9557 | HB3 | SER | 638 | 58.805 | 49.563 | 81.749 | 0.00 | 0.00 |
| ATOM | 9558 | OG  | SER | 638 | 59.364 | 50.338 | 79.958 | 0.00 | 0.00 |
| ATOM | 9559 | HG  | SER | 638 | 59.095 | 49.441 | 79.749 | 0.00 | 0.00 |
| ATOM | 9560 | C   | SER | 638 | 56.949 | 51.130 | 82.563 | 0.00 | 0.00 |
| ATOM | 9561 | O   | SER | 638 | 57.332 | 52.045 | 83.355 | 0.00 | 0.00 |
| ATOM | 9562 | N   | PRO | 639 | 56.117 | 50.167 | 83.016 | 0.00 | 0.00 |
| ATOM | 9563 | CD  | PRO | 639 | 55.739 | 48.917 | 82.234 | 0.00 | 0.00 |
| ATOM | 9564 | HD2 | PRO | 639 | 56.602 | 48.254 | 82.177 | 0.00 | 0.00 |
| ATOM | 9565 | HD3 | PRO | 639 | 55.386 | 49.030 | 81.209 | 0.00 | 0.00 |
| ATOM | 9566 | CG  | PRO | 639 | 54.711 | 48.220 | 83.063 | 0.00 | 0.00 |

|      |      |         |     |        |        |        |      |      |
|------|------|---------|-----|--------|--------|--------|------|------|
| ATOM | 9567 | HG2 PRO | 639 | 53.718 | 48.483 | 82.697 | 0.00 | 0.00 |
| ATOM | 9568 | HG3 PRO | 639 | 54.746 | 47.131 | 83.025 | 0.00 | 0.00 |
| ATOM | 9569 | CB PRO  | 639 | 54.849 | 48.710 | 84.472 | 0.00 | 0.00 |
| ATOM | 9570 | HB2 PRO | 639 | 53.980 | 48.766 | 85.127 | 0.00 | 0.00 |
| ATOM | 9571 | HB3 PRO | 639 | 55.618 | 48.134 | 84.987 | 0.00 | 0.00 |
| ATOM | 9572 | CA PRO  | 639 | 55.448 | 50.197 | 84.326 | 0.00 | 0.00 |
| ATOM | 9573 | HA PRO  | 639 | 54.646 | 50.934 | 84.271 | 0.00 | 0.00 |
| ATOM | 9574 | C PRO   | 639 | 56.432 | 50.475 | 85.493 | 0.00 | 0.00 |
| ATOM | 9575 | O PRO   | 639 | 56.065 | 51.279 | 86.308 | 0.00 | 0.00 |
| ATOM | 9576 | N ALA   | 640 | 57.597 | 49.803 | 85.648 | 0.00 | 0.00 |
| ATOM | 9577 | H ALA   | 640 | 57.710 | 49.026 | 85.014 | 0.00 | 0.00 |
| ATOM | 9578 | CA ALA  | 640 | 58.584 | 49.975 | 86.692 | 0.00 | 0.00 |
| ATOM | 9579 | HA ALA  | 640 | 58.266 | 49.535 | 87.637 | 0.00 | 0.00 |
| ATOM | 9580 | CB ALA  | 640 | 59.833 | 49.126 | 86.251 | 0.00 | 0.00 |
| ATOM | 9581 | HB1 ALA | 640 | 60.816 | 49.347 | 86.667 | 0.00 | 0.00 |
| ATOM | 9582 | HB2 ALA | 640 | 59.671 | 48.075 | 86.489 | 0.00 | 0.00 |
| ATOM | 9583 | HB3 ALA | 640 | 59.939 | 49.249 | 85.174 | 0.00 | 0.00 |
| ATOM | 9584 | C ALA   | 640 | 59.107 | 51.420 | 86.886 | 0.00 | 0.00 |
| ATOM | 9585 | O ALA   | 640 | 59.736 | 51.655 | 87.911 | 0.00 | 0.00 |
| ATOM | 9586 | N PHE   | 641 | 58.843 | 52.263 | 85.941 | 0.00 | 0.00 |
| ATOM | 9587 | H PHE   | 641 | 58.289 | 52.033 | 85.128 | 0.00 | 0.00 |
| ATOM | 9588 | CA PHE  | 641 | 59.299 | 53.668 | 85.854 | 0.00 | 0.00 |
| ATOM | 9589 | HA PHE  | 641 | 59.523 | 53.958 | 86.880 | 0.00 | 0.00 |
| ATOM | 9590 | CB PHE  | 641 | 60.494 | 53.836 | 84.848 | 0.00 | 0.00 |
| ATOM | 9591 | HB2 PHE | 641 | 60.154 | 53.903 | 83.815 | 0.00 | 0.00 |
| ATOM | 9592 | HB3 PHE | 641 | 60.867 | 54.839 | 85.058 | 0.00 | 0.00 |

|      |      |     |     |     |        |        |        |      |      |
|------|------|-----|-----|-----|--------|--------|--------|------|------|
| ATOM | 9593 | CG  | PHE | 641 | 61.590 | 52.779 | 84.921 | 0.00 | 0.00 |
| ATOM | 9594 | CD1 | PHE | 641 | 62.015 | 52.020 | 83.853 | 0.00 | 0.00 |
| ATOM | 9595 | HD1 | PHE | 641 | 61.361 | 51.889 | 83.004 | 0.00 | 0.00 |
| ATOM | 9596 | CE1 | PHE | 641 | 63.157 | 51.192 | 83.965 | 0.00 | 0.00 |
| ATOM | 9597 | HE1 | PHE | 641 | 63.434 | 50.427 | 83.255 | 0.00 | 0.00 |
| ATOM | 9598 | CZ  | PHE | 641 | 63.977 | 51.330 | 85.112 | 0.00 | 0.00 |
| ATOM | 9599 | HZ  | PHE | 641 | 64.889 | 50.753 | 85.077 | 0.00 | 0.00 |
| ATOM | 9600 | CE2 | PHE | 641 | 63.672 | 52.277 | 86.125 | 0.00 | 0.00 |
| ATOM | 9601 | HE2 | PHE | 641 | 64.321 | 52.553 | 86.943 | 0.00 | 0.00 |
| ATOM | 9602 | CD2 | PHE | 641 | 62.433 | 52.895 | 86.088 | 0.00 | 0.00 |
| ATOM | 9603 | HD2 | PHE | 641 | 62.171 | 53.590 | 86.872 | 0.00 | 0.00 |
| ATOM | 9604 | C   | PHE | 641 | 58.145 | 54.645 | 85.460 | 0.00 | 0.00 |
| ATOM | 9605 | O   | PHE | 641 | 58.393 | 55.847 | 85.386 | 0.00 | 0.00 |
| ATOM | 9606 | N   | PHE | 642 | 56.879 | 54.255 | 85.437 | 0.00 | 0.00 |
| ATOM | 9607 | H   | PHE | 642 | 56.621 | 53.282 | 85.521 | 0.00 | 0.00 |
| ATOM | 9608 | CA  | PHE | 642 | 55.673 | 55.169 | 85.288 | 0.00 | 0.00 |
| ATOM | 9609 | HA  | PHE | 642 | 55.675 | 55.724 | 84.349 | 0.00 | 0.00 |
| ATOM | 9610 | CB  | PHE | 642 | 54.428 | 54.231 | 85.193 | 0.00 | 0.00 |
| ATOM | 9611 | HB2 | PHE | 642 | 54.457 | 53.668 | 84.260 | 0.00 | 0.00 |
| ATOM | 9612 | HB3 | PHE | 642 | 54.473 | 53.510 | 86.009 | 0.00 | 0.00 |
| ATOM | 9613 | CG  | PHE | 642 | 53.084 | 54.948 | 85.288 | 0.00 | 0.00 |
| ATOM | 9614 | CD1 | PHE | 642 | 52.295 | 55.295 | 84.152 | 0.00 | 0.00 |
| ATOM | 9615 | HD1 | PHE | 642 | 52.694 | 55.142 | 83.160 | 0.00 | 0.00 |
| ATOM | 9616 | CE1 | PHE | 642 | 51.045 | 55.888 | 84.355 | 0.00 | 0.00 |
| ATOM | 9617 | HE1 | PHE | 642 | 50.298 | 56.067 | 83.596 | 0.00 | 0.00 |
| ATOM | 9618 | CZ  | PHE | 642 | 50.643 | 56.183 | 85.696 | 0.00 | 0.00 |

|      |      |      |     |     |        |        |        |      |      |
|------|------|------|-----|-----|--------|--------|--------|------|------|
| ATOM | 9619 | HZ   | PHE | 642 | 49.725 | 56.693 | 85.948 | 0.00 | 0.00 |
| ATOM | 9620 | CE2  | PHE | 642 | 51.449 | 55.836 | 86.829 | 0.00 | 0.00 |
| ATOM | 9621 | HE2  | PHE | 642 | 51.214 | 56.104 | 87.849 | 0.00 | 0.00 |
| ATOM | 9622 | CD2  | PHE | 642 | 52.663 | 55.238 | 86.578 | 0.00 | 0.00 |
| ATOM | 9623 | HD2  | PHE | 642 | 53.339 | 54.919 | 87.357 | 0.00 | 0.00 |
| ATOM | 9624 | C    | PHE | 642 | 55.558 | 56.333 | 86.384 | 0.00 | 0.00 |
| ATOM | 9625 | O    | PHE | 642 | 55.931 | 56.102 | 87.565 | 0.00 | 0.00 |
| ATOM | 9626 | N    | GLY | 643 | 55.262 | 57.535 | 85.951 | 0.00 | 0.00 |
| ATOM | 9627 | H    | GLY | 643 | 54.966 | 57.637 | 84.991 | 0.00 | 0.00 |
| ATOM | 9628 | CA   | GLY | 643 | 55.493 | 58.841 | 86.628 | 0.00 | 0.00 |
| ATOM | 9629 | HA2  | GLY | 643 | 55.209 | 59.682 | 85.995 | 0.00 | 0.00 |
| ATOM | 9630 | HA3  | GLY | 643 | 54.865 | 58.860 | 87.519 | 0.00 | 0.00 |
| ATOM | 9631 | C    | GLY | 643 | 56.883 | 59.120 | 87.081 | 0.00 | 0.00 |
| ATOM | 9632 | O    | GLY | 643 | 57.132 | 60.281 | 87.509 | 0.00 | 0.00 |
| ATOM | 9633 | N    | VAL | 644 | 57.771 | 58.098 | 87.115 | 0.00 | 0.00 |
| ATOM | 9634 | H    | VAL | 644 | 57.524 | 57.152 | 86.863 | 0.00 | 0.00 |
| ATOM | 9635 | CA   | VAL | 644 | 59.179 | 58.385 | 87.586 | 0.00 | 0.00 |
| ATOM | 9636 | HA   | VAL | 644 | 59.144 | 59.063 | 88.439 | 0.00 | 0.00 |
| ATOM | 9637 | CB   | VAL | 644 | 59.919 | 57.220 | 88.245 | 0.00 | 0.00 |
| ATOM | 9638 | HB   | VAL | 644 | 60.409 | 56.637 | 87.465 | 0.00 | 0.00 |
| ATOM | 9639 | CG1  | VAL | 644 | 61.159 | 57.781 | 88.996 | 0.00 | 0.00 |
| ATOM | 9640 | 1HG1 | VAL | 644 | 61.759 | 58.373 | 88.304 | 0.00 | 0.00 |
| ATOM | 9641 | 2HG1 | VAL | 644 | 60.859 | 58.363 | 89.868 | 0.00 | 0.00 |
| ATOM | 9642 | 3HG1 | VAL | 644 | 61.773 | 56.989 | 89.424 | 0.00 | 0.00 |
| ATOM | 9643 | CG2  | VAL | 644 | 59.096 | 56.304 | 89.185 | 0.00 | 0.00 |
| ATOM | 9644 | 1HG2 | VAL | 644 | 58.633 | 56.862 | 90.000 | 0.00 | 0.00 |

|      |      |      |     |     |        |        |        |      |      |
|------|------|------|-----|-----|--------|--------|--------|------|------|
| ATOM | 9645 | 2HG2 | VAL | 644 | 58.430 | 55.658 | 88.612 | 0.00 | 0.00 |
| ATOM | 9646 | 3HG2 | VAL | 644 | 59.796 | 55.622 | 89.666 | 0.00 | 0.00 |
| ATOM | 9647 | C    | VAL | 644 | 60.040 | 58.987 | 86.413 | 0.00 | 0.00 |
| ATOM | 9648 | O    | VAL | 644 | 60.415 | 60.148 | 86.535 | 0.00 | 0.00 |
| ATOM | 9649 | N    | LYS | 645 | 60.218 | 58.225 | 85.354 | 0.00 | 0.00 |
| ATOM | 9650 | H    | LYS | 645 | 59.581 | 57.450 | 85.246 | 0.00 | 0.00 |
| ATOM | 9651 | CA   | LYS | 645 | 60.954 | 58.582 | 84.155 | 0.00 | 0.00 |
| ATOM | 9652 | HA   | LYS | 645 | 60.976 | 59.667 | 84.061 | 0.00 | 0.00 |
| ATOM | 9653 | CB   | LYS | 645 | 62.467 | 58.045 | 84.282 | 0.00 | 0.00 |
| ATOM | 9654 | HB2  | LYS | 645 | 62.488 | 56.963 | 84.414 | 0.00 | 0.00 |
| ATOM | 9655 | HB3  | LYS | 645 | 62.866 | 58.196 | 83.280 | 0.00 | 0.00 |
| ATOM | 9656 | CG   | LYS | 645 | 63.357 | 58.908 | 85.181 | 0.00 | 0.00 |
| ATOM | 9657 | HG2  | LYS | 645 | 63.197 | 59.924 | 84.821 | 0.00 | 0.00 |
| ATOM | 9658 | HG3  | LYS | 645 | 63.018 | 58.956 | 86.216 | 0.00 | 0.00 |
| ATOM | 9659 | CD   | LYS | 645 | 64.835 | 58.454 | 85.188 | 0.00 | 0.00 |
| ATOM | 9660 | HD2  | LYS | 645 | 64.927 | 57.456 | 85.617 | 0.00 | 0.00 |
| ATOM | 9661 | HD3  | LYS | 645 | 65.134 | 58.358 | 84.145 | 0.00 | 0.00 |
| ATOM | 9662 | CE   | LYS | 645 | 65.720 | 59.498 | 85.893 | 0.00 | 0.00 |
| ATOM | 9663 | HE2  | LYS | 645 | 65.496 | 60.456 | 85.424 | 0.00 | 0.00 |
| ATOM | 9664 | HE3  | LYS | 645 | 65.407 | 59.636 | 86.928 | 0.00 | 0.00 |
| ATOM | 9665 | NZ   | LYS | 645 | 67.144 | 59.217 | 85.837 | 0.00 | 0.00 |
| ATOM | 9666 | HZ1  | LYS | 645 | 67.701 | 59.918 | 86.306 | 0.00 | 0.00 |
| ATOM | 9667 | HZ2  | LYS | 645 | 67.321 | 58.308 | 86.240 | 0.00 | 0.00 |
| ATOM | 9668 | HZ3  | LYS | 645 | 67.483 | 59.236 | 84.886 | 0.00 | 0.00 |
| ATOM | 9669 | C    | LYS | 645 | 60.385 | 57.934 | 82.908 | 0.00 | 0.00 |
| ATOM | 9670 | O    | LYS | 645 | 60.380 | 56.714 | 82.820 | 0.00 | 0.00 |

|      |      |     |     |     |        |        |        |      |      |
|------|------|-----|-----|-----|--------|--------|--------|------|------|
| ATOM | 9671 | N   | PRO | 646 | 59.981 | 58.710 | 81.871 | 0.00 | 0.00 |
| ATOM | 9672 | CD  | PRO | 646 | 59.633 | 60.157 | 81.843 | 0.00 | 0.00 |
| ATOM | 9673 | HD2 | PRO | 646 | 60.437 | 60.817 | 82.168 | 0.00 | 0.00 |
| ATOM | 9674 | HD3 | PRO | 646 | 58.679 | 60.306 | 82.349 | 0.00 | 0.00 |
| ATOM | 9675 | CG  | PRO | 646 | 59.302 | 60.445 | 80.363 | 0.00 | 0.00 |
| ATOM | 9676 | HG2 | PRO | 646 | 58.487 | 61.161 | 80.261 | 0.00 | 0.00 |
| ATOM | 9677 | HG3 | PRO | 646 | 60.251 | 60.797 | 79.959 | 0.00 | 0.00 |
| ATOM | 9678 | CB  | PRO | 646 | 58.847 | 59.097 | 79.779 | 0.00 | 0.00 |
| ATOM | 9679 | HB2 | PRO | 646 | 57.776 | 58.944 | 79.918 | 0.00 | 0.00 |
| ATOM | 9680 | HB3 | PRO | 646 | 59.178 | 58.932 | 78.754 | 0.00 | 0.00 |
| ATOM | 9681 | CA  | PRO | 646 | 59.620 | 58.013 | 80.611 | 0.00 | 0.00 |
| ATOM | 9682 | HA  | PRO | 646 | 58.959 | 57.213 | 80.946 | 0.00 | 0.00 |
| ATOM | 9683 | C   | PRO | 646 | 60.755 | 57.375 | 79.776 | 0.00 | 0.00 |
| ATOM | 9684 | O   | PRO | 646 | 61.830 | 57.889 | 79.782 | 0.00 | 0.00 |
| ATOM | 9685 | N   | ALA | 647 | 60.378 | 56.410 | 78.840 | 0.00 | 0.00 |
| ATOM | 9686 | H   | ALA | 647 | 59.385 | 56.414 | 78.654 | 0.00 | 0.00 |
| ATOM | 9687 | CA  | ALA | 647 | 61.282 | 55.911 | 77.845 | 0.00 | 0.00 |
| ATOM | 9688 | HA  | ALA | 647 | 62.313 | 55.817 | 78.186 | 0.00 | 0.00 |
| ATOM | 9689 | CB  | ALA | 647 | 60.845 | 54.538 | 77.515 | 0.00 | 0.00 |
| ATOM | 9690 | HB1 | ALA | 647 | 61.668 | 54.051 | 76.992 | 0.00 | 0.00 |
| ATOM | 9691 | HB2 | ALA | 647 | 60.652 | 54.031 | 78.461 | 0.00 | 0.00 |
| ATOM | 9692 | HB3 | ALA | 647 | 59.973 | 54.572 | 76.863 | 0.00 | 0.00 |
| ATOM | 9693 | C   | ALA | 647 | 61.275 | 56.835 | 76.565 | 0.00 | 0.00 |
| ATOM | 9694 | O   | ALA | 647 | 62.127 | 56.709 | 75.702 | 0.00 | 0.00 |
| ATOM | 9695 | N   | THR | 648 | 60.221 | 57.648 | 76.243 | 0.00 | 0.00 |
| ATOM | 9696 | H   | THR | 648 | 59.563 | 57.744 | 77.003 | 0.00 | 0.00 |



|      |      |      |     |     |        |        |        |      |      |
|------|------|------|-----|-----|--------|--------|--------|------|------|
| ATOM | 9697 | CA   | THR | 648 | 60.053 | 58.448 | 74.925 | 0.00 | 0.00 |
| ATOM | 9698 | HA   | THR | 648 | 60.999 | 58.895 | 74.621 | 0.00 | 0.00 |
| ATOM | 9699 | CB   | THR | 648 | 59.641 | 57.451 | 73.802 | 0.00 | 0.00 |
| ATOM | 9700 | HB   | THR | 648 | 58.927 | 56.811 | 74.320 | 0.00 | 0.00 |
| ATOM | 9701 | CG2  | THR | 648 | 59.133 | 58.039 | 72.503 | 0.00 | 0.00 |
| ATOM | 9702 | 1HG2 | THR | 648 | 60.014 | 58.223 | 71.888 | 0.00 | 0.00 |
| ATOM | 9703 | 2HG2 | THR | 648 | 58.560 | 57.198 | 72.110 | 0.00 | 0.00 |
| ATOM | 9704 | 3HG2 | THR | 648 | 58.573 | 58.968 | 72.603 | 0.00 | 0.00 |
| ATOM | 9705 | OG1  | THR | 648 | 60.733 | 56.614 | 73.483 | 0.00 | 0.00 |
| ATOM | 9706 | HG1  | THR | 648 | 61.231 | 56.666 | 74.302 | 0.00 | 0.00 |
| ATOM | 9707 | C    | THR | 648 | 58.951 | 59.457 | 75.054 | 0.00 | 0.00 |
| ATOM | 9708 | O    | THR | 648 | 57.911 | 59.167 | 75.585 | 0.00 | 0.00 |
| ATOM | 9709 | N    | VAL | 649 | 59.175 | 60.643 | 74.460 | 0.00 | 0.00 |
| ATOM | 9710 | H    | VAL | 649 | 59.976 | 60.885 | 73.895 | 0.00 | 0.00 |
| ATOM | 9711 | CA   | VAL | 649 | 58.080 | 61.618 | 74.504 | 0.00 | 0.00 |
| ATOM | 9712 | HA   | VAL | 649 | 57.232 | 61.330 | 75.126 | 0.00 | 0.00 |
| ATOM | 9713 | CB   | VAL | 649 | 58.424 | 62.913 | 75.203 | 0.00 | 0.00 |
| ATOM | 9714 | HB   | VAL | 649 | 59.342 | 63.297 | 74.758 | 0.00 | 0.00 |
| ATOM | 9715 | CG1  | VAL | 649 | 57.308 | 63.947 | 75.164 | 0.00 | 0.00 |
| ATOM | 9716 | 1HG1 | VAL | 649 | 56.387 | 63.554 | 75.595 | 0.00 | 0.00 |
| ATOM | 9717 | 2HG1 | VAL | 649 | 57.583 | 64.807 | 75.776 | 0.00 | 0.00 |
| ATOM | 9718 | 3HG1 | VAL | 649 | 57.136 | 64.309 | 74.151 | 0.00 | 0.00 |
| ATOM | 9719 | CG2  | VAL | 649 | 58.715 | 62.627 | 76.612 | 0.00 | 0.00 |
| ATOM | 9720 | 1HG2 | VAL | 649 | 57.862 | 62.135 | 77.079 | 0.00 | 0.00 |
| ATOM | 9721 | 2HG2 | VAL | 649 | 59.513 | 61.885 | 76.622 | 0.00 | 0.00 |
| ATOM | 9722 | 3HG2 | VAL | 649 | 59.017 | 63.508 | 77.179 | 0.00 | 0.00 |

|      |      |      |     |     |        |        |        |      |      |
|------|------|------|-----|-----|--------|--------|--------|------|------|
| ATOM | 9723 | C    | VAL | 649 | 57.758 | 62.047 | 73.036 | 0.00 | 0.00 |
| ATOM | 9724 | O    | VAL | 649 | 58.692 | 62.258 | 72.290 | 0.00 | 0.00 |
| ATOM | 9725 | N    | ILE | 650 | 56.480 | 61.962 | 72.629 | 0.00 | 0.00 |
| ATOM | 9726 | H    | ILE | 650 | 55.792 | 61.725 | 73.330 | 0.00 | 0.00 |
| ATOM | 9727 | CA   | ILE | 650 | 56.135 | 62.159 | 71.282 | 0.00 | 0.00 |
| ATOM | 9728 | HA   | ILE | 650 | 57.027 | 62.231 | 70.660 | 0.00 | 0.00 |
| ATOM | 9729 | CB   | ILE | 650 | 55.271 | 60.922 | 70.730 | 0.00 | 0.00 |
| ATOM | 9730 | HB   | ILE | 650 | 54.384 | 60.892 | 71.363 | 0.00 | 0.00 |
| ATOM | 9731 | CG2  | ILE | 650 | 54.893 | 61.095 | 69.248 | 0.00 | 0.00 |
| ATOM | 9732 | 1HG2 | ILE | 650 | 54.513 | 62.116 | 69.218 | 0.00 | 0.00 |
| ATOM | 9733 | 2HG2 | ILE | 650 | 55.789 | 60.899 | 68.658 | 0.00 | 0.00 |
| ATOM | 9734 | 3HG2 | ILE | 650 | 54.084 | 60.451 | 68.904 | 0.00 | 0.00 |
| ATOM | 9735 | CG1  | ILE | 650 | 56.012 | 59.557 | 70.983 | 0.00 | 0.00 |
| ATOM | 9736 | 2HG1 | ILE | 650 | 57.041 | 59.572 | 70.626 | 0.00 | 0.00 |
| ATOM | 9737 | 3HG1 | ILE | 650 | 56.163 | 59.393 | 72.050 | 0.00 | 0.00 |
| ATOM | 9738 | CD1  | ILE | 650 | 55.351 | 58.283 | 70.467 | 0.00 | 0.00 |
| ATOM | 9739 | 1HD1 | ILE | 650 | 54.336 | 58.234 | 70.861 | 0.00 | 0.00 |
| ATOM | 9740 | 2HD1 | ILE | 650 | 55.337 | 58.221 | 69.379 | 0.00 | 0.00 |
| ATOM | 9741 | 3HD1 | ILE | 650 | 55.849 | 57.432 | 70.933 | 0.00 | 0.00 |
| ATOM | 9742 | C    | ILE | 650 | 55.378 | 63.507 | 71.172 | 0.00 | 0.00 |
| ATOM | 9743 | O    | ILE | 650 | 54.486 | 63.867 | 72.079 | 0.00 | 0.00 |
| ATOM | 9744 | N    | LYS | 651 | 55.752 | 64.217 | 70.128 | 0.00 | 0.00 |
| ATOM | 9745 | H    | LYS | 651 | 56.514 | 63.824 | 69.596 | 0.00 | 0.00 |
| ATOM | 9746 | CA   | LYS | 651 | 55.110 | 65.520 | 69.749 | 0.00 | 0.00 |
| ATOM | 9747 | HA   | LYS | 651 | 54.242 | 65.722 | 70.377 | 0.00 | 0.00 |
| ATOM | 9748 | CB   | LYS | 651 | 56.063 | 66.767 | 69.822 | 0.00 | 0.00 |

|      |      |     |     |     |        |        |        |      |      |
|------|------|-----|-----|-----|--------|--------|--------|------|------|
| ATOM | 9749 | HB2 | LYS | 651 | 57.015 | 66.540 | 69.342 | 0.00 | 0.00 |
| ATOM | 9750 | HB3 | LYS | 651 | 55.562 | 67.593 | 69.317 | 0.00 | 0.00 |
| ATOM | 9751 | CG  | LYS | 651 | 56.339 | 67.153 | 71.255 | 0.00 | 0.00 |
| ATOM | 9752 | HG2 | LYS | 651 | 57.005 | 68.013 | 71.185 | 0.00 | 0.00 |
| ATOM | 9753 | HG3 | LYS | 651 | 56.835 | 66.388 | 71.852 | 0.00 | 0.00 |
| ATOM | 9754 | CD  | LYS | 651 | 55.235 | 67.577 | 72.110 | 0.00 | 0.00 |
| ATOM | 9755 | HD2 | LYS | 651 | 54.498 | 66.780 | 72.204 | 0.00 | 0.00 |
| ATOM | 9756 | HD3 | LYS | 651 | 55.713 | 67.673 | 73.085 | 0.00 | 0.00 |
| ATOM | 9757 | CE  | LYS | 651 | 54.502 | 68.925 | 71.778 | 0.00 | 0.00 |
| ATOM | 9758 | HE2 | LYS | 651 | 54.157 | 69.494 | 72.642 | 0.00 | 0.00 |
| ATOM | 9759 | HE3 | LYS | 651 | 55.282 | 69.528 | 71.313 | 0.00 | 0.00 |
| ATOM | 9760 | NZ  | LYS | 651 | 53.370 | 68.747 | 70.826 | 0.00 | 0.00 |
| ATOM | 9761 | HZ1 | LYS | 651 | 53.654 | 68.253 | 69.992 | 0.00 | 0.00 |
| ATOM | 9762 | HZ2 | LYS | 651 | 52.690 | 68.070 | 71.140 | 0.00 | 0.00 |
| ATOM | 9763 | HZ3 | LYS | 651 | 52.849 | 69.607 | 70.730 | 0.00 | 0.00 |
| ATOM | 9764 | C   | LYS | 651 | 54.478 | 65.265 | 68.402 | 0.00 | 0.00 |
| ATOM | 9765 | O   | LYS | 651 | 55.145 | 65.153 | 67.380 | 0.00 | 0.00 |
| ATOM | 9766 | N   | GLY | 652 | 53.141 | 65.252 | 68.285 | 0.00 | 0.00 |
| ATOM | 9767 | H   | GLY | 652 | 52.629 | 65.484 | 69.124 | 0.00 | 0.00 |
| ATOM | 9768 | CA  | GLY | 652 | 52.448 | 65.303 | 66.938 | 0.00 | 0.00 |
| ATOM | 9769 | HA2 | GLY | 652 | 51.376 | 65.456 | 67.065 | 0.00 | 0.00 |
| ATOM | 9770 | HA3 | GLY | 652 | 52.940 | 66.136 | 66.436 | 0.00 | 0.00 |
| ATOM | 9771 | C   | GLY | 652 | 52.588 | 64.105 | 66.150 | 0.00 | 0.00 |
| ATOM | 9772 | O   | GLY | 652 | 52.416 | 64.178 | 64.935 | 0.00 | 0.00 |
| ATOM | 9773 | N   | GLY | 653 | 53.005 | 62.977 | 66.783 | 0.00 | 0.00 |
| ATOM | 9774 | H   | GLY | 653 | 53.037 | 62.991 | 67.793 | 0.00 | 0.00 |

|      |      |     |     |     |        |        |        |      |      |
|------|------|-----|-----|-----|--------|--------|--------|------|------|
| ATOM | 9775 | CA  | GLY | 653 | 53.086 | 61.657 | 66.228 | 0.00 | 0.00 |
| ATOM | 9776 | HA2 | GLY | 653 | 52.857 | 60.915 | 66.993 | 0.00 | 0.00 |
| ATOM | 9777 | HA3 | GLY | 653 | 52.419 | 61.492 | 65.382 | 0.00 | 0.00 |
| ATOM | 9778 | C   | GLY | 653 | 54.488 | 61.386 | 65.772 | 0.00 | 0.00 |
| ATOM | 9779 | O   | GLY | 653 | 54.839 | 60.329 | 65.243 | 0.00 | 0.00 |
| ATOM | 9780 | N   | MET | 654 | 55.387 | 62.313 | 65.964 | 0.00 | 0.00 |
| ATOM | 9781 | H   | MET | 654 | 55.024 | 63.226 | 66.199 | 0.00 | 0.00 |
| ATOM | 9782 | CA  | MET | 654 | 56.828 | 62.243 | 65.689 | 0.00 | 0.00 |
| ATOM | 9783 | HA  | MET | 654 | 56.914 | 61.250 | 65.250 | 0.00 | 0.00 |
| ATOM | 9784 | CB  | MET | 654 | 57.279 | 63.354 | 64.751 | 0.00 | 0.00 |
| ATOM | 9785 | HB2 | MET | 654 | 56.546 | 63.304 | 63.946 | 0.00 | 0.00 |
| ATOM | 9786 | HB3 | MET | 654 | 57.219 | 64.344 | 65.202 | 0.00 | 0.00 |
| ATOM | 9787 | CG  | MET | 654 | 58.681 | 63.188 | 64.193 | 0.00 | 0.00 |
| ATOM | 9788 | HG2 | MET | 654 | 59.319 | 63.310 | 65.068 | 0.00 | 0.00 |
| ATOM | 9789 | HG3 | MET | 654 | 58.856 | 62.221 | 63.721 | 0.00 | 0.00 |
| ATOM | 9790 | SD  | MET | 654 | 59.061 | 64.486 | 62.939 | 0.00 | 0.00 |
| ATOM | 9791 | CE  | MET | 654 | 60.610 | 63.896 | 62.316 | 0.00 | 0.00 |
| ATOM | 9792 | HE1 | MET | 654 | 60.436 | 62.892 | 61.929 | 0.00 | 0.00 |
| ATOM | 9793 | HE2 | MET | 654 | 60.836 | 64.570 | 61.490 | 0.00 | 0.00 |
| ATOM | 9794 | HE3 | MET | 654 | 61.391 | 64.078 | 63.055 | 0.00 | 0.00 |
| ATOM | 9795 | C   | MET | 654 | 57.570 | 62.254 | 67.030 | 0.00 | 0.00 |
| ATOM | 9796 | O   | MET | 654 | 57.215 | 62.970 | 67.956 | 0.00 | 0.00 |
| ATOM | 9797 | N   | ILE | 655 | 58.664 | 61.472 | 67.170 | 0.00 | 0.00 |
| ATOM | 9798 | H   | ILE | 655 | 58.963 | 60.920 | 66.379 | 0.00 | 0.00 |
| ATOM | 9799 | CA  | ILE | 655 | 59.425 | 61.439 | 68.431 | 0.00 | 0.00 |
| ATOM | 9800 | HA  | ILE | 655 | 58.709 | 61.382 | 69.251 | 0.00 | 0.00 |

|      |      |      |     |     |        |        |        |      |      |
|------|------|------|-----|-----|--------|--------|--------|------|------|
| ATOM | 9801 | CB   | ILE | 655 | 60.347 | 60.289 | 68.525 | 0.00 | 0.00 |
| ATOM | 9802 | HB   | ILE | 655 | 61.070 | 60.360 | 67.712 | 0.00 | 0.00 |
| ATOM | 9803 | CG2  | ILE | 655 | 61.033 | 60.339 | 69.864 | 0.00 | 0.00 |
| ATOM | 9804 | 1HG2 | ILE | 655 | 61.792 | 61.120 | 69.888 | 0.00 | 0.00 |
| ATOM | 9805 | 2HG2 | ILE | 655 | 60.318 | 60.295 | 70.686 | 0.00 | 0.00 |
| ATOM | 9806 | 3HG2 | ILE | 655 | 61.562 | 59.403 | 70.041 | 0.00 | 0.00 |
| ATOM | 9807 | CG1  | ILE | 655 | 59.705 | 58.842 | 68.450 | 0.00 | 0.00 |
| ATOM | 9808 | 2HG1 | ILE | 655 | 60.475 | 58.113 | 68.702 | 0.00 | 0.00 |
| ATOM | 9809 | 3HG1 | ILE | 655 | 58.906 | 58.680 | 69.175 | 0.00 | 0.00 |
| ATOM | 9810 | CD1  | ILE | 655 | 59.109 | 58.291 | 67.126 | 0.00 | 0.00 |
| ATOM | 9811 | 1HD1 | ILE | 655 | 58.920 | 57.221 | 67.211 | 0.00 | 0.00 |
| ATOM | 9812 | 2HD1 | ILE | 655 | 58.130 | 58.771 | 67.119 | 0.00 | 0.00 |
| ATOM | 9813 | 3HD1 | ILE | 655 | 59.756 | 58.481 | 66.270 | 0.00 | 0.00 |
| ATOM | 9814 | C    | ILE | 655 | 60.256 | 62.763 | 68.599 | 0.00 | 0.00 |
| ATOM | 9815 | O    | ILE | 655 | 61.127 | 63.003 | 67.802 | 0.00 | 0.00 |
| ATOM | 9816 | N    | ALA | 656 | 60.041 | 63.493 | 69.707 | 0.00 | 0.00 |
| ATOM | 9817 | H    | ALA | 656 | 59.407 | 63.095 | 70.386 | 0.00 | 0.00 |
| ATOM | 9818 | CA   | ALA | 656 | 60.770 | 64.705 | 70.100 | 0.00 | 0.00 |
| ATOM | 9819 | HA   | ALA | 656 | 61.066 | 65.236 | 69.195 | 0.00 | 0.00 |
| ATOM | 9820 | CB   | ALA | 656 | 59.786 | 65.565 | 70.921 | 0.00 | 0.00 |
| ATOM | 9821 | HB1  | ALA | 656 | 59.142 | 66.158 | 70.272 | 0.00 | 0.00 |
| ATOM | 9822 | HB2  | ALA | 656 | 59.239 | 64.959 | 71.642 | 0.00 | 0.00 |
| ATOM | 9823 | HB3  | ALA | 656 | 60.360 | 66.320 | 71.458 | 0.00 | 0.00 |
| ATOM | 9824 | C    | ALA | 656 | 62.028 | 64.452 | 70.955 | 0.00 | 0.00 |
| ATOM | 9825 | O    | ALA | 656 | 63.080 | 64.939 | 70.571 | 0.00 | 0.00 |
| ATOM | 9826 | N    | ILE | 657 | 62.020 | 63.859 | 72.145 | 0.00 | 0.00 |

|      |      |      |     |     |        |        |        |      |      |
|------|------|------|-----|-----|--------|--------|--------|------|------|
| ATOM | 9827 | H    | ILE | 657 | 61.142 | 63.568 | 72.550 | 0.00 | 0.00 |
| ATOM | 9828 | CA   | ILE | 657 | 63.285 | 63.638 | 72.955 | 0.00 | 0.00 |
| ATOM | 9829 | HA   | ILE | 657 | 64.250 | 63.703 | 72.453 | 0.00 | 0.00 |
| ATOM | 9830 | CB   | ILE | 657 | 63.314 | 64.723 | 74.088 | 0.00 | 0.00 |
| ATOM | 9831 | HB   | ILE | 657 | 64.141 | 64.458 | 74.746 | 0.00 | 0.00 |
| ATOM | 9832 | CG2  | ILE | 657 | 63.528 | 66.162 | 73.611 | 0.00 | 0.00 |
| ATOM | 9833 | 1HG2 | ILE | 657 | 64.492 | 66.219 | 73.105 | 0.00 | 0.00 |
| ATOM | 9834 | 2HG2 | ILE | 657 | 62.793 | 66.368 | 72.833 | 0.00 | 0.00 |
| ATOM | 9835 | 3HG2 | ILE | 657 | 63.438 | 66.799 | 74.491 | 0.00 | 0.00 |
| ATOM | 9836 | CG1  | ILE | 657 | 62.099 | 64.622 | 74.988 | 0.00 | 0.00 |
| ATOM | 9837 | 2HG1 | ILE | 657 | 61.162 | 64.832 | 74.472 | 0.00 | 0.00 |
| ATOM | 9838 | 3HG1 | ILE | 657 | 62.009 | 63.599 | 75.355 | 0.00 | 0.00 |
| ATOM | 9839 | CD1  | ILE | 657 | 62.195 | 65.354 | 76.264 | 0.00 | 0.00 |
| ATOM | 9840 | 1HD1 | ILE | 657 | 63.099 | 65.069 | 76.801 | 0.00 | 0.00 |
| ATOM | 9841 | 2HD1 | ILE | 657 | 62.109 | 66.426 | 76.085 | 0.00 | 0.00 |
| ATOM | 9842 | 3HD1 | ILE | 657 | 61.407 | 65.166 | 76.994 | 0.00 | 0.00 |
| ATOM | 9843 | C    | ILE | 657 | 63.275 | 62.196 | 73.451 | 0.00 | 0.00 |
| ATOM | 9844 | O    | ILE | 657 | 62.179 | 61.646 | 73.682 | 0.00 | 0.00 |
| ATOM | 9845 | N    | ALA | 658 | 64.437 | 61.507 | 73.616 | 0.00 | 0.00 |
| ATOM | 9846 | H    | ALA | 658 | 65.326 | 61.986 | 73.644 | 0.00 | 0.00 |
| ATOM | 9847 | CA   | ALA | 658 | 64.427 | 60.167 | 74.126 | 0.00 | 0.00 |
| ATOM | 9848 | HA   | ALA | 658 | 63.681 | 60.060 | 74.913 | 0.00 | 0.00 |
| ATOM | 9849 | CB   | ALA | 658 | 64.050 | 59.167 | 72.960 | 0.00 | 0.00 |
| ATOM | 9850 | HB1  | ALA | 658 | 64.765 | 59.263 | 72.143 | 0.00 | 0.00 |
| ATOM | 9851 | HB2  | ALA | 658 | 63.916 | 58.093 | 73.083 | 0.00 | 0.00 |
| ATOM | 9852 | HB3  | ALA | 658 | 63.092 | 59.551 | 72.608 | 0.00 | 0.00 |

|      |      |     |     |     |        |        |        |      |      |
|------|------|-----|-----|-----|--------|--------|--------|------|------|
| ATOM | 9853 | C   | ALA | 658 | 65.765 | 59.737 | 74.716 | 0.00 | 0.00 |
| ATOM | 9854 | O   | ALA | 658 | 66.783 | 60.350 | 74.302 | 0.00 | 0.00 |
| ATOM | 9855 | N   | PRO | 659 | 65.838 | 58.763 | 75.637 | 0.00 | 0.00 |
| ATOM | 9856 | CD  | PRO | 659 | 64.733 | 57.937 | 76.006 | 0.00 | 0.00 |
| ATOM | 9857 | HD2 | PRO | 659 | 64.562 | 57.292 | 75.144 | 0.00 | 0.00 |
| ATOM | 9858 | HD3 | PRO | 659 | 63.910 | 58.538 | 76.392 | 0.00 | 0.00 |
| ATOM | 9859 | CG  | PRO | 659 | 65.258 | 57.054 | 77.134 | 0.00 | 0.00 |
| ATOM | 9860 | HG2 | PRO | 659 | 64.566 | 57.168 | 77.969 | 0.00 | 0.00 |
| ATOM | 9861 | HG3 | PRO | 659 | 65.340 | 56.020 | 76.798 | 0.00 | 0.00 |
| ATOM | 9862 | CB  | PRO | 659 | 66.581 | 57.682 | 77.518 | 0.00 | 0.00 |
| ATOM | 9863 | HB2 | PRO | 659 | 66.396 | 58.473 | 78.246 | 0.00 | 0.00 |
| ATOM | 9864 | HB3 | PRO | 659 | 67.196 | 56.863 | 77.890 | 0.00 | 0.00 |
| ATOM | 9865 | CA  | PRO | 659 | 67.104 | 58.344 | 76.272 | 0.00 | 0.00 |
| ATOM | 9866 | HA  | PRO | 659 | 67.658 | 59.228 | 76.587 | 0.00 | 0.00 |
| ATOM | 9867 | C   | PRO | 659 | 67.902 | 57.435 | 75.396 | 0.00 | 0.00 |
| ATOM | 9868 | O   | PRO | 659 | 67.567 | 56.283 | 75.197 | 0.00 | 0.00 |
| ATOM | 9869 | N   | MET | 660 | 68.973 | 58.012 | 74.789 | 0.00 | 0.00 |
| ATOM | 9870 | H   | MET | 660 | 69.120 | 59.010 | 74.842 | 0.00 | 0.00 |
| ATOM | 9871 | CA  | MET | 660 | 69.811 | 57.390 | 73.733 | 0.00 | 0.00 |
| ATOM | 9872 | HA  | MET | 660 | 69.395 | 56.436 | 73.410 | 0.00 | 0.00 |
| ATOM | 9873 | CB  | MET | 660 | 69.587 | 58.289 | 72.489 | 0.00 | 0.00 |
| ATOM | 9874 | HB2 | MET | 660 | 68.537 | 58.246 | 72.201 | 0.00 | 0.00 |
| ATOM | 9875 | HB3 | MET | 660 | 69.772 | 59.333 | 72.744 | 0.00 | 0.00 |
| ATOM | 9876 | CG  | MET | 660 | 70.483 | 57.938 | 71.295 | 0.00 | 0.00 |
| ATOM | 9877 | HG2 | MET | 660 | 70.388 | 58.704 | 70.526 | 0.00 | 0.00 |
| ATOM | 9878 | HG3 | MET | 660 | 71.532 | 57.902 | 71.589 | 0.00 | 0.00 |

|      |      |     |     |     |        |        |        |      |      |
|------|------|-----|-----|-----|--------|--------|--------|------|------|
| ATOM | 9879 | SD  | MET | 660 | 70.254 | 56.309 | 70.589 | 0.00 | 0.00 |
| ATOM | 9880 | CE  | MET | 660 | 71.940 | 55.851 | 69.949 | 0.00 | 0.00 |
| ATOM | 9881 | HE1 | MET | 660 | 72.258 | 56.644 | 69.272 | 0.00 | 0.00 |
| ATOM | 9882 | HE2 | MET | 660 | 72.648 | 55.690 | 70.762 | 0.00 | 0.00 |
| ATOM | 9883 | HE3 | MET | 660 | 71.740 | 54.993 | 69.307 | 0.00 | 0.00 |
| ATOM | 9884 | C   | MET | 660 | 71.230 | 57.157 | 74.128 | 0.00 | 0.00 |
| ATOM | 9885 | O   | MET | 660 | 71.886 | 57.993 | 74.771 | 0.00 | 0.00 |
| ATOM | 9886 | N   | GLY | 661 | 71.730 | 55.917 | 73.912 | 0.00 | 0.00 |
| ATOM | 9887 | H   | GLY | 661 | 71.055 | 55.258 | 73.551 | 0.00 | 0.00 |
| ATOM | 9888 | CA  | GLY | 661 | 73.061 | 55.447 | 74.233 | 0.00 | 0.00 |
| ATOM | 9889 | HA2 | GLY | 661 | 73.420 | 55.750 | 75.216 | 0.00 | 0.00 |
| ATOM | 9890 | HA3 | GLY | 661 | 73.124 | 54.359 | 74.237 | 0.00 | 0.00 |
| ATOM | 9891 | C   | GLY | 661 | 74.108 | 55.873 | 73.286 | 0.00 | 0.00 |
| ATOM | 9892 | O   | GLY | 661 | 74.003 | 56.960 | 72.766 | 0.00 | 0.00 |
| ATOM | 9893 | N   | ASP | 662 | 75.216 | 55.156 | 73.131 | 0.00 | 0.00 |
| ATOM | 9894 | H   | ASP | 662 | 75.329 | 54.206 | 73.456 | 0.00 | 0.00 |
| ATOM | 9895 | CA  | ASP | 662 | 76.385 | 55.665 | 72.349 | 0.00 | 0.00 |
| ATOM | 9896 | HA  | ASP | 662 | 76.684 | 56.632 | 72.754 | 0.00 | 0.00 |
| ATOM | 9897 | CB  | ASP | 662 | 77.499 | 54.584 | 72.467 | 0.00 | 0.00 |
| ATOM | 9898 | HB2 | ASP | 662 | 77.621 | 54.368 | 73.528 | 0.00 | 0.00 |
| ATOM | 9899 | HB3 | ASP | 662 | 77.226 | 53.615 | 72.051 | 0.00 | 0.00 |
| ATOM | 9900 | CG  | ASP | 662 | 78.794 | 55.096 | 71.844 | 0.00 | 0.00 |
| ATOM | 9901 | OD1 | ASP | 662 | 79.535 | 54.261 | 71.366 | 0.00 | 0.00 |
| ATOM | 9902 | OD2 | ASP | 662 | 79.032 | 56.354 | 72.017 | 0.00 | 0.00 |
| ATOM | 9903 | C   | ASP | 662 | 75.964 | 55.968 | 70.832 | 0.00 | 0.00 |
| ATOM | 9904 | O   | ASP | 662 | 75.612 | 55.099 | 70.071 | 0.00 | 0.00 |



|      |      |      |     |     |        |        |        |      |      |
|------|------|------|-----|-----|--------|--------|--------|------|------|
| ATOM | 9905 | N    | ILE | 663 | 76.244 | 57.184 | 70.424 | 0.00 | 0.00 |
| ATOM | 9906 | H    | ILE | 663 | 76.656 | 57.822 | 71.090 | 0.00 | 0.00 |
| ATOM | 9907 | CA   | ILE | 663 | 75.876 | 57.670 | 69.107 | 0.00 | 0.00 |
| ATOM | 9908 | HA   | ILE | 663 | 74.868 | 57.319 | 68.890 | 0.00 | 0.00 |
| ATOM | 9909 | CB   | ILE | 663 | 75.938 | 59.243 | 69.178 | 0.00 | 0.00 |
| ATOM | 9910 | HB   | ILE | 663 | 76.975 | 59.499 | 69.398 | 0.00 | 0.00 |
| ATOM | 9911 | CG2  | ILE | 663 | 75.470 | 59.887 | 67.856 | 0.00 | 0.00 |
| ATOM | 9912 | 1HG2 | ILE | 663 | 76.066 | 59.468 | 67.045 | 0.00 | 0.00 |
| ATOM | 9913 | 2HG2 | ILE | 663 | 74.408 | 59.732 | 67.667 | 0.00 | 0.00 |
| ATOM | 9914 | 3HG2 | ILE | 663 | 75.781 | 60.930 | 67.926 | 0.00 | 0.00 |
| ATOM | 9915 | CG1  | ILE | 663 | 75.088 | 59.909 | 70.324 | 0.00 | 0.00 |
| ATOM | 9916 | 2HG1 | ILE | 663 | 75.400 | 59.577 | 71.314 | 0.00 | 0.00 |
| ATOM | 9917 | 3HG1 | ILE | 663 | 75.270 | 60.981 | 70.245 | 0.00 | 0.00 |
| ATOM | 9918 | CD1  | ILE | 663 | 73.591 | 59.581 | 70.211 | 0.00 | 0.00 |
| ATOM | 9919 | 1HD1 | ILE | 663 | 73.084 | 60.149 | 69.431 | 0.00 | 0.00 |
| ATOM | 9920 | 2HD1 | ILE | 663 | 73.567 | 58.508 | 70.020 | 0.00 | 0.00 |
| ATOM | 9921 | 3HD1 | ILE | 663 | 73.173 | 59.777 | 71.198 | 0.00 | 0.00 |
| ATOM | 9922 | C    | ILE | 663 | 76.715 | 57.072 | 67.955 | 0.00 | 0.00 |
| ATOM | 9923 | O    | ILE | 663 | 76.255 | 56.938 | 66.816 | 0.00 | 0.00 |
| ATOM | 9924 | N    | ASN | 664 | 77.921 | 56.602 | 68.254 | 0.00 | 0.00 |
| ATOM | 9925 | H    | ASN | 664 | 78.252 | 57.059 | 69.091 | 0.00 | 0.00 |
| ATOM | 9926 | CA   | ASN | 664 | 78.875 | 55.984 | 67.259 | 0.00 | 0.00 |
| ATOM | 9927 | HA   | ASN | 664 | 78.831 | 56.547 | 66.326 | 0.00 | 0.00 |
| ATOM | 9928 | CB   | ASN | 664 | 80.349 | 56.080 | 67.737 | 0.00 | 0.00 |
| ATOM | 9929 | HB2  | ASN | 664 | 80.524 | 57.125 | 67.994 | 0.00 | 0.00 |
| ATOM | 9930 | HB3  | ASN | 664 | 80.375 | 55.455 | 68.629 | 0.00 | 0.00 |

|      |      |      |     |     |        |        |        |      |      |
|------|------|------|-----|-----|--------|--------|--------|------|------|
| ATOM | 9931 | CG   | ASN | 664 | 81.321 | 55.659 | 66.616 | 0.00 | 0.00 |
| ATOM | 9932 | OD1  | ASN | 664 | 81.320 | 56.187 | 65.517 | 0.00 | 0.00 |
| ATOM | 9933 | ND2  | ASN | 664 | 82.153 | 54.670 | 66.892 | 0.00 | 0.00 |
| ATOM | 9934 | 1HD2 | ASN | 664 | 82.749 | 54.359 | 66.139 | 0.00 | 0.00 |
| ATOM | 9935 | 2HD2 | ASN | 664 | 82.089 | 54.135 | 67.746 | 0.00 | 0.00 |
| ATOM | 9936 | C    | ASN | 664 | 78.574 | 54.507 | 67.014 | 0.00 | 0.00 |
| ATOM | 9937 | O    | ASN | 664 | 79.050 | 53.970 | 66.007 | 0.00 | 0.00 |
| ATOM | 9938 | N    | ALA | 665 | 77.981 | 53.821 | 67.986 | 0.00 | 0.00 |
| ATOM | 9939 | H    | ALA | 665 | 77.494 | 54.354 | 68.692 | 0.00 | 0.00 |
| ATOM | 9940 | CA   | ALA | 665 | 77.947 | 52.380 | 68.128 | 0.00 | 0.00 |
| ATOM | 9941 | HA   | ALA | 665 | 78.958 | 51.973 | 68.107 | 0.00 | 0.00 |
| ATOM | 9942 | CB   | ALA | 665 | 77.237 | 52.182 | 69.481 | 0.00 | 0.00 |
| ATOM | 9943 | HB1  | ALA | 665 | 77.209 | 51.100 | 69.613 | 0.00 | 0.00 |
| ATOM | 9944 | HB2  | ALA | 665 | 77.814 | 52.630 | 70.290 | 0.00 | 0.00 |
| ATOM | 9945 | HB3  | ALA | 665 | 76.242 | 52.612 | 69.367 | 0.00 | 0.00 |
| ATOM | 9946 | C    | ALA | 665 | 77.298 | 51.603 | 66.971 | 0.00 | 0.00 |
| ATOM | 9947 | O    | ALA | 665 | 76.525 | 52.027 | 66.091 | 0.00 | 0.00 |
| ATOM | 9948 | N    | SER | 666 | 77.443 | 50.276 | 67.054 | 0.00 | 0.00 |
| ATOM | 9949 | H    | SER | 666 | 78.068 | 49.816 | 67.700 | 0.00 | 0.00 |
| ATOM | 9950 | CA   | SER | 666 | 76.651 | 49.351 | 66.235 | 0.00 | 0.00 |
| ATOM | 9951 | HA   | SER | 666 | 76.710 | 49.706 | 65.206 | 0.00 | 0.00 |
| ATOM | 9952 | CB   | SER | 666 | 77.248 | 47.980 | 66.422 | 0.00 | 0.00 |
| ATOM | 9953 | HB2  | SER | 666 | 76.673 | 47.296 | 65.796 | 0.00 | 0.00 |
| ATOM | 9954 | HB3  | SER | 666 | 78.304 | 47.871 | 66.176 | 0.00 | 0.00 |
| ATOM | 9955 | OG   | SER | 666 | 77.069 | 47.597 | 67.758 | 0.00 | 0.00 |
| ATOM | 9956 | HG   | SER | 666 | 77.828 | 47.976 | 68.207 | 0.00 | 0.00 |

|      |      |      |     |     |        |        |        |      |      |
|------|------|------|-----|-----|--------|--------|--------|------|------|
| ATOM | 9957 | C    | SER | 666 | 75.094 | 49.215 | 66.504 | 0.00 | 0.00 |
| ATOM | 9958 | O    | SER | 666 | 74.285 | 48.956 | 65.683 | 0.00 | 0.00 |
| ATOM | 9959 | N    | ILE | 667 | 74.703 | 49.441 | 67.728 | 0.00 | 0.00 |
| ATOM | 9960 | H    | ILE | 667 | 75.446 | 49.601 | 68.394 | 0.00 | 0.00 |
| ATOM | 9961 | CA   | ILE | 667 | 73.341 | 49.324 | 68.197 | 0.00 | 0.00 |
| ATOM | 9962 | HA   | ILE | 667 | 72.543 | 49.296 | 67.455 | 0.00 | 0.00 |
| ATOM | 9963 | CB   | ILE | 667 | 73.093 | 47.976 | 68.971 | 0.00 | 0.00 |
| ATOM | 9964 | HB   | ILE | 667 | 72.088 | 48.135 | 69.360 | 0.00 | 0.00 |
| ATOM | 9965 | CG2  | ILE | 667 | 72.904 | 46.954 | 67.806 | 0.00 | 0.00 |
| ATOM | 9966 | 1HG2 | ILE | 667 | 72.259 | 47.362 | 67.029 | 0.00 | 0.00 |
| ATOM | 9967 | 2HG2 | ILE | 667 | 73.845 | 46.783 | 67.282 | 0.00 | 0.00 |
| ATOM | 9968 | 3HG2 | ILE | 667 | 72.470 | 46.015 | 68.151 | 0.00 | 0.00 |
| ATOM | 9969 | CG1  | ILE | 667 | 74.066 | 47.612 | 70.081 | 0.00 | 0.00 |
| ATOM | 9970 | 2HG1 | ILE | 667 | 75.079 | 47.447 | 69.714 | 0.00 | 0.00 |
| ATOM | 9971 | 3HG1 | ILE | 667 | 73.932 | 48.289 | 70.924 | 0.00 | 0.00 |
| ATOM | 9972 | CD1  | ILE | 667 | 73.705 | 46.248 | 70.743 | 0.00 | 0.00 |
| ATOM | 9973 | 1HD1 | ILE | 667 | 73.974 | 45.393 | 70.123 | 0.00 | 0.00 |
| ATOM | 9974 | 2HD1 | ILE | 667 | 74.249 | 46.203 | 71.687 | 0.00 | 0.00 |
| ATOM | 9975 | 3HD1 | ILE | 667 | 72.642 | 46.376 | 70.949 | 0.00 | 0.00 |
| ATOM | 9976 | C    | ILE | 667 | 73.120 | 50.470 | 69.174 | 0.00 | 0.00 |
| ATOM | 9977 | O    | ILE | 667 | 74.098 | 51.008 | 69.698 | 0.00 | 0.00 |
| ATOM | 9978 | N    | PRO | 668 | 71.872 | 50.872 | 69.489 | 0.00 | 0.00 |
| ATOM | 9979 | CD   | PRO | 668 | 70.531 | 50.311 | 69.068 | 0.00 | 0.00 |
| ATOM | 9980 | HD2  | PRO | 668 | 70.274 | 50.233 | 68.011 | 0.00 | 0.00 |
| ATOM | 9981 | HD3  | PRO | 668 | 70.393 | 49.396 | 69.644 | 0.00 | 0.00 |
| ATOM | 9982 | CG   | PRO | 668 | 69.447 | 51.221 | 69.686 | 0.00 | 0.00 |

|      |       |          |     |        |        |        |      |      |
|------|-------|----------|-----|--------|--------|--------|------|------|
| ATOM | 9983  | HG2 PRO  | 668 | 68.606 | 51.319 | 69.000 | 0.00 | 0.00 |
| ATOM | 9984  | HG3 PRO  | 668 | 69.107 | 50.885 | 70.666 | 0.00 | 0.00 |
| ATOM | 9985  | CB PRO   | 668 | 70.203 | 52.555 | 69.820 | 0.00 | 0.00 |
| ATOM | 9986  | HB2 PRO  | 668 | 70.304 | 53.016 | 68.837 | 0.00 | 0.00 |
| ATOM | 9987  | HB3 PRO  | 668 | 69.778 | 53.252 | 70.541 | 0.00 | 0.00 |
| ATOM | 9988  | CA PRO   | 668 | 71.575 | 52.100 | 70.317 | 0.00 | 0.00 |
| ATOM | 9989  | HA PRO   | 668 | 72.299 | 52.896 | 70.142 | 0.00 | 0.00 |
| ATOM | 9990  | C PRO    | 668 | 71.579 | 51.934 | 71.874 | 0.00 | 0.00 |
| ATOM | 9991  | O PRO    | 668 | 71.379 | 52.856 | 72.646 | 0.00 | 0.00 |
| ATOM | 9992  | N THR    | 669 | 71.795 | 50.692 | 72.355 | 0.00 | 0.00 |
| ATOM | 9993  | H THR    | 669 | 71.963 | 49.936 | 71.706 | 0.00 | 0.00 |
| ATOM | 9994  | CA THR   | 669 | 71.811 | 50.264 | 73.714 | 0.00 | 0.00 |
| ATOM | 9995  | HA THR   | 669 | 71.042 | 50.889 | 74.169 | 0.00 | 0.00 |
| ATOM | 9996  | CB THR   | 669 | 71.383 | 48.778 | 73.729 | 0.00 | 0.00 |
| ATOM | 9997  | HB THR   | 669 | 71.398 | 48.575 | 74.800 | 0.00 | 0.00 |
| ATOM | 9998  | CG2 THR  | 669 | 69.997 | 48.413 | 73.152 | 0.00 | 0.00 |
| ATOM | 9999  | 1HG2 THR | 669 | 69.180 | 48.978 | 73.601 | 0.00 | 0.00 |
| ATOM | 10000 | 2HG2 THR | 669 | 70.002 | 48.688 | 72.098 | 0.00 | 0.00 |
| ATOM | 10001 | 3HG2 THR | 669 | 69.824 | 47.349 | 73.310 | 0.00 | 0.00 |
| ATOM | 10002 | OG1 THR  | 669 | 72.308 | 48.033 | 73.021 | 0.00 | 0.00 |
| TER  | 0     | 0        |     |        |        |        |      |      |
| ATOM | 10003 | HG1 THR  | 669 | 72.320 | 47.231 | 73.549 | 0.00 | 0.00 |
| ATOM | 10004 | C THR    | 669 | 73.073 | 50.493 | 74.618 | 0.00 | 0.00 |
| ATOM | 10005 | O THR    | 669 | 72.943 | 50.211 | 75.835 | 0.00 | 0.00 |
| ATOM | 10006 | N PRO    | 670 | 74.283 | 50.952 | 74.165 | 0.00 | 0.00 |
| ATOM | 10007 | CD PRO   | 670 | 74.714 | 51.024 | 72.784 | 0.00 | 0.00 |

|      |       |          |     |        |        |        |      |      |
|------|-------|----------|-----|--------|--------|--------|------|------|
| ATOM | 10008 | HD2 PRO  | 670 | 74.584 | 52.015 | 72.349 | 0.00 | 0.00 |
| ATOM | 10009 | HD3 PRO  | 670 | 74.118 | 50.271 | 72.269 | 0.00 | 0.00 |
| ATOM | 10010 | CG PRO   | 670 | 76.180 | 50.592 | 72.830 | 0.00 | 0.00 |
| ATOM | 10011 | HG2 PRO  | 670 | 76.220 | 49.525 | 73.049 | 0.00 | 0.00 |
| ATOM | 10012 | HG3 PRO  | 670 | 76.731 | 50.880 | 71.935 | 0.00 | 0.00 |
| ATOM | 10013 | CB PRO   | 670 | 76.714 | 51.338 | 74.030 | 0.00 | 0.00 |
| ATOM | 10014 | HB2 PRO  | 670 | 77.669 | 50.977 | 74.409 | 0.00 | 0.00 |
| ATOM | 10015 | HB3 PRO  | 670 | 76.757 | 52.354 | 73.637 | 0.00 | 0.00 |
| ATOM | 10016 | CA PRO   | 670 | 75.517 | 51.123 | 75.009 | 0.00 | 0.00 |
| ATOM | 10017 | HA PRO   | 670 | 75.742 | 50.132 | 75.404 | 0.00 | 0.00 |
| ATOM | 10018 | C PRO    | 670 | 75.582 | 52.309 | 76.041 | 0.00 | 0.00 |
| ATOM | 10019 | O PRO    | 670 | 75.169 | 53.439 | 75.762 | 0.00 | 0.00 |
| ATOM | 10020 | N GLN    | 671 | 76.185 | 52.085 | 77.248 | 0.00 | 0.00 |
| ATOM | 10021 | H GLN    | 671 | 76.501 | 51.134 | 77.372 | 0.00 | 0.00 |
| ATOM | 10022 | CA GLN   | 671 | 76.115 | 53.067 | 78.337 | 0.00 | 0.00 |
| ATOM | 10023 | HA GLN   | 671 | 75.119 | 53.508 | 78.377 | 0.00 | 0.00 |
| ATOM | 10024 | CB GLN   | 671 | 76.411 | 52.436 | 79.720 | 0.00 | 0.00 |
| ATOM | 10025 | HB2 GLN  | 671 | 77.368 | 51.939 | 79.558 | 0.00 | 0.00 |
| ATOM | 10026 | HB3 GLN  | 671 | 76.477 | 53.290 | 80.394 | 0.00 | 0.00 |
| ATOM | 10027 | CG GLN   | 671 | 75.375 | 51.394 | 80.128 | 0.00 | 0.00 |
| ATOM | 10028 | HG2 GLN  | 671 | 75.438 | 50.674 | 79.312 | 0.00 | 0.00 |
| ATOM | 10029 | HG3 GLN  | 671 | 75.538 | 50.885 | 81.078 | 0.00 | 0.00 |
| ATOM | 10030 | CD GLN   | 671 | 73.975 | 52.001 | 80.111 | 0.00 | 0.00 |
| ATOM | 10031 | OE1 GLN  | 671 | 73.646 | 53.095 | 80.608 | 0.00 | 0.00 |
| ATOM | 10032 | NE2 GLN  | 671 | 73.026 | 51.361 | 79.488 | 0.00 | 0.00 |
| ATOM | 10033 | 1HE2 GLN | 671 | 72.137 | 51.824 | 79.365 | 0.00 | 0.00 |

|      |       |      |     |     |        |        |        |      |      |
|------|-------|------|-----|-----|--------|--------|--------|------|------|
| ATOM | 10034 | 2HE2 | GLN | 671 | 73.143 | 50.417 | 79.149 | 0.00 | 0.00 |
| ATOM | 10035 | C    | GLN | 671 | 77.115 | 54.269 | 78.019 | 0.00 | 0.00 |
| ATOM | 10036 | O    | GLN | 671 | 78.052 | 54.014 | 77.252 | 0.00 | 0.00 |
| ATOM | 10037 | N    | PRO | 672 | 76.966 | 55.530 | 78.486 | 0.00 | 0.00 |
| ATOM | 10038 | CD   | PRO | 672 | 77.703 | 56.700 | 78.076 | 0.00 | 0.00 |
| ATOM | 10039 | HD2  | PRO | 672 | 78.781 | 56.542 | 78.117 | 0.00 | 0.00 |
| ATOM | 10040 | HD3  | PRO | 672 | 77.365 | 56.951 | 77.071 | 0.00 | 0.00 |
| ATOM | 10041 | CG   | PRO | 672 | 77.390 | 57.880 | 78.963 | 0.00 | 0.00 |
| ATOM | 10042 | HG2  | PRO | 672 | 78.264 | 58.317 | 79.445 | 0.00 | 0.00 |
| ATOM | 10043 | HG3  | PRO | 672 | 76.928 | 58.725 | 78.453 | 0.00 | 0.00 |
| ATOM | 10044 | CB   | PRO | 672 | 76.404 | 57.288 | 79.970 | 0.00 | 0.00 |
| ATOM | 10045 | HB2  | PRO | 672 | 76.995 | 57.004 | 80.841 | 0.00 | 0.00 |
| ATOM | 10046 | HB3  | PRO | 672 | 75.622 | 58.017 | 80.182 | 0.00 | 0.00 |
| ATOM | 10047 | CA   | PRO | 672 | 75.852 | 56.012 | 79.320 | 0.00 | 0.00 |
| ATOM | 10048 | HA   | PRO | 672 | 75.622 | 55.283 | 80.098 | 0.00 | 0.00 |
| ATOM | 10049 | C    | PRO | 672 | 74.569 | 56.263 | 78.445 | 0.00 | 0.00 |
| ATOM | 10050 | O    | PRO | 672 | 74.559 | 57.167 | 77.593 | 0.00 | 0.00 |
| ATOM | 10051 | N    | VAL | 673 | 73.404 | 55.711 | 78.795 | 0.00 | 0.00 |
| ATOM | 10052 | H    | VAL | 673 | 73.439 | 54.974 | 79.484 | 0.00 | 0.00 |
| ATOM | 10053 | CA   | VAL | 673 | 72.064 | 56.148 | 78.359 | 0.00 | 0.00 |
| ATOM | 10054 | HA   | VAL | 673 | 72.151 | 56.417 | 77.306 | 0.00 | 0.00 |
| ATOM | 10055 | CB   | VAL | 673 | 70.979 | 55.027 | 78.498 | 0.00 | 0.00 |
| ATOM | 10056 | HB   | VAL | 673 | 70.934 | 54.641 | 79.516 | 0.00 | 0.00 |
| ATOM | 10057 | CG1  | VAL | 673 | 69.546 | 55.431 | 78.098 | 0.00 | 0.00 |
| ATOM | 10058 | 1HG1 | VAL | 673 | 68.786 | 54.654 | 78.178 | 0.00 | 0.00 |
| ATOM | 10059 | 2HG1 | VAL | 673 | 69.204 | 56.099 | 78.889 | 0.00 | 0.00 |

|      |       |      |     |     |        |        |        |      |      |
|------|-------|------|-----|-----|--------|--------|--------|------|------|
| ATOM | 10060 | 3HG1 | VAL | 673 | 69.542 | 55.881 | 77.105 | 0.00 | 0.00 |
| ATOM | 10061 | CG2  | VAL | 673 | 71.276 | 53.873 | 77.524 | 0.00 | 0.00 |
| ATOM | 10062 | 1HG2 | VAL | 673 | 71.397 | 54.222 | 76.498 | 0.00 | 0.00 |
| ATOM | 10063 | 2HG2 | VAL | 673 | 72.247 | 53.396 | 77.657 | 0.00 | 0.00 |
| ATOM | 10064 | 3HG2 | VAL | 673 | 70.558 | 53.053 | 77.548 | 0.00 | 0.00 |
| ATOM | 10065 | C    | VAL | 673 | 71.667 | 57.378 | 79.147 | 0.00 | 0.00 |
| ATOM | 10066 | O    | VAL | 673 | 71.317 | 57.345 | 80.326 | 0.00 | 0.00 |
| ATOM | 10067 | N    | HIE | 674 | 71.479 | 58.462 | 78.384 | 0.00 | 0.00 |
| ATOM | 10068 | H    | HIE | 674 | 71.712 | 58.479 | 77.402 | 0.00 | 0.00 |
| ATOM | 10069 | CA   | HIE | 674 | 70.913 | 59.779 | 78.844 | 0.00 | 0.00 |
| ATOM | 10070 | HA   | HIE | 674 | 70.325 | 59.573 | 79.738 | 0.00 | 0.00 |
| ATOM | 10071 | CB   | HIE | 674 | 72.010 | 60.799 | 79.237 | 0.00 | 0.00 |
| ATOM | 10072 | HB2  | HIE | 674 | 71.467 | 61.708 | 79.495 | 0.00 | 0.00 |
| ATOM | 10073 | HB3  | HIE | 674 | 72.575 | 60.477 | 80.112 | 0.00 | 0.00 |
| ATOM | 10074 | CG   | HIE | 674 | 72.963 | 61.232 | 78.138 | 0.00 | 0.00 |
| ATOM | 10075 | ND1  | HIE | 674 | 73.074 | 62.510 | 77.593 | 0.00 | 0.00 |
| ATOM | 10076 | CE1  | HIE | 674 | 74.193 | 62.511 | 76.908 | 0.00 | 0.00 |
| ATOM | 10077 | HE1  | HIE | 674 | 74.630 | 63.394 | 76.466 | 0.00 | 0.00 |
| ATOM | 10078 | NE2  | HIE | 674 | 74.776 | 61.360 | 76.984 | 0.00 | 0.00 |
| ATOM | 10079 | HE2  | HIE | 674 | 75.711 | 61.240 | 76.624 | 0.00 | 0.00 |
| ATOM | 10080 | CD2  | HIE | 674 | 73.986 | 60.465 | 77.690 | 0.00 | 0.00 |
| ATOM | 10081 | HD2  | HIE | 674 | 74.356 | 59.543 | 78.113 | 0.00 | 0.00 |
| ATOM | 10082 | C    | HIE | 674 | 69.992 | 60.475 | 77.835 | 0.00 | 0.00 |
| ATOM | 10083 | O    | HIE | 674 | 70.084 | 60.071 | 76.717 | 0.00 | 0.00 |
| ATOM | 10084 | N    | TYR | 675 | 69.204 | 61.481 | 78.142 | 0.00 | 0.00 |
| ATOM | 10085 | H    | TYR | 675 | 69.194 | 61.723 | 79.123 | 0.00 | 0.00 |

|      |       |     |     |     |        |        |        |      |      |
|------|-------|-----|-----|-----|--------|--------|--------|------|------|
| ATOM | 10086 | CA  | TYR | 675 | 68.156 | 62.035 | 77.274 | 0.00 | 0.00 |
| ATOM | 10087 | HA  | TYR | 675 | 67.610 | 61.291 | 76.694 | 0.00 | 0.00 |
| ATOM | 10088 | CB  | TYR | 675 | 67.124 | 62.744 | 78.107 | 0.00 | 0.00 |
| ATOM | 10089 | HB2 | TYR | 675 | 67.338 | 62.725 | 79.176 | 0.00 | 0.00 |
| ATOM | 10090 | HB3 | TYR | 675 | 66.909 | 63.805 | 77.981 | 0.00 | 0.00 |
| ATOM | 10091 | CG  | TYR | 675 | 65.761 | 62.018 | 78.066 | 0.00 | 0.00 |
| ATOM | 10092 | CD1 | TYR | 675 | 65.531 | 60.954 | 79.013 | 0.00 | 0.00 |
| ATOM | 10093 | HD1 | TYR | 675 | 66.347 | 60.607 | 79.629 | 0.00 | 0.00 |
| ATOM | 10094 | CE1 | TYR | 675 | 64.331 | 60.198 | 78.968 | 0.00 | 0.00 |
| ATOM | 10095 | HE1 | TYR | 675 | 64.206 | 59.332 | 79.601 | 0.00 | 0.00 |
| ATOM | 10096 | CZ  | TYR | 675 | 63.295 | 60.586 | 78.084 | 0.00 | 0.00 |
| ATOM | 10097 | OH  | TYR | 675 | 62.110 | 59.907 | 78.109 | 0.00 | 0.00 |
| ATOM | 10098 | HH  | TYR | 675 | 61.981 | 59.244 | 78.792 | 0.00 | 0.00 |
| ATOM | 10099 | CE2 | TYR | 675 | 63.528 | 61.672 | 77.167 | 0.00 | 0.00 |
| ATOM | 10100 | HE2 | TYR | 675 | 62.766 | 61.970 | 76.462 | 0.00 | 0.00 |
| ATOM | 10101 | CD2 | TYR | 675 | 64.763 | 62.355 | 77.190 | 0.00 | 0.00 |
| ATOM | 10102 | HD2 | TYR | 675 | 64.824 | 63.197 | 76.516 | 0.00 | 0.00 |
| ATOM | 10103 | C   | TYR | 675 | 68.773 | 62.971 | 76.225 | 0.00 | 0.00 |
| ATOM | 10104 | O   | TYR | 675 | 69.624 | 63.809 | 76.568 | 0.00 | 0.00 |
| ATOM | 10105 | N   | ARG | 676 | 68.305 | 62.751 | 74.989 | 0.00 | 0.00 |
| ATOM | 10106 | H   | ARG | 676 | 67.455 | 62.225 | 74.842 | 0.00 | 0.00 |
| ATOM | 10107 | CA  | ARG | 676 | 68.766 | 63.548 | 73.877 | 0.00 | 0.00 |
| ATOM | 10108 | HA  | ARG | 676 | 69.144 | 64.512 | 74.219 | 0.00 | 0.00 |
| ATOM | 10109 | CB  | ARG | 676 | 69.835 | 62.699 | 73.116 | 0.00 | 0.00 |
| ATOM | 10110 | HB2 | ARG | 676 | 69.304 | 61.962 | 72.514 | 0.00 | 0.00 |
| ATOM | 10111 | HB3 | ARG | 676 | 70.347 | 63.328 | 72.388 | 0.00 | 0.00 |



|      |       |      |     |     |        |        |        |      |      |
|------|-------|------|-----|-----|--------|--------|--------|------|------|
| ATOM | 10112 | CG   | ARG | 676 | 70.883 | 61.955 | 73.915 | 0.00 | 0.00 |
| ATOM | 10113 | HG2  | ARG | 676 | 71.252 | 62.718 | 74.600 | 0.00 | 0.00 |
| ATOM | 10114 | HG3  | ARG | 676 | 70.513 | 61.094 | 74.474 | 0.00 | 0.00 |
| ATOM | 10115 | CD   | ARG | 676 | 72.113 | 61.496 | 73.142 | 0.00 | 0.00 |
| ATOM | 10116 | HD2  | ARG | 676 | 72.762 | 62.331 | 72.877 | 0.00 | 0.00 |
| ATOM | 10117 | HD3  | ARG | 676 | 71.701 | 61.004 | 72.262 | 0.00 | 0.00 |
| ATOM | 10118 | NE   | ARG | 676 | 72.833 | 60.478 | 73.838 | 0.00 | 0.00 |
| ATOM | 10119 | HE   | ARG | 676 | 72.297 | 59.675 | 74.132 | 0.00 | 0.00 |
| ATOM | 10120 | CZ   | ARG | 676 | 74.161 | 60.347 | 73.990 | 0.00 | 0.00 |
| ATOM | 10121 | NH1  | ARG | 676 | 74.736 | 59.284 | 74.505 | 0.00 | 0.00 |
| ATOM | 10122 | 1HH1 | ARG | 676 | 75.722 | 59.300 | 74.723 | 0.00 | 0.00 |
| ATOM | 10123 | 2HH1 | ARG | 676 | 74.248 | 58.412 | 74.356 | 0.00 | 0.00 |
| ATOM | 10124 | NH2  | ARG | 676 | 74.939 | 61.383 | 73.882 | 0.00 | 0.00 |
| ATOM | 10125 | 1HH2 | ARG | 676 | 75.937 | 61.254 | 73.969 | 0.00 | 0.00 |
| ATOM | 10126 | 2HH2 | ARG | 676 | 74.545 | 62.295 | 73.698 | 0.00 | 0.00 |
| ATOM | 10127 | C    | ARG | 676 | 67.588 | 63.989 | 72.929 | 0.00 | 0.00 |
| ATOM | 10128 | O    | ARG | 676 | 66.620 | 63.178 | 72.835 | 0.00 | 0.00 |
| ATOM | 10129 | N    | PRO | 677 | 67.712 | 65.076 | 72.141 | 0.00 | 0.00 |
| ATOM | 10130 | CD   | PRO | 677 | 68.691 | 66.142 | 72.390 | 0.00 | 0.00 |
| ATOM | 10131 | HD2  | PRO | 677 | 69.716 | 65.836 | 72.183 | 0.00 | 0.00 |
| ATOM | 10132 | HD3  | PRO | 677 | 68.757 | 66.312 | 73.465 | 0.00 | 0.00 |
| ATOM | 10133 | CG   | PRO | 677 | 68.338 | 67.307 | 71.501 | 0.00 | 0.00 |
| ATOM | 10134 | HG2  | PRO | 677 | 67.837 | 68.078 | 72.086 | 0.00 | 0.00 |
| ATOM | 10135 | HG3  | PRO | 677 | 69.241 | 67.703 | 71.036 | 0.00 | 0.00 |
| ATOM | 10136 | CB   | PRO | 677 | 67.399 | 66.788 | 70.440 | 0.00 | 0.00 |
| ATOM | 10137 | HB2  | PRO | 677 | 66.619 | 67.523 | 70.245 | 0.00 | 0.00 |

|      |       |     |     |     |        |        |        |      |      |
|------|-------|-----|-----|-----|--------|--------|--------|------|------|
| ATOM | 10138 | HB3 | PRO | 677 | 67.932 | 66.489 | 69.537 | 0.00 | 0.00 |
| ATOM | 10139 | CA  | PRO | 677 | 66.790 | 65.460 | 71.008 | 0.00 | 0.00 |
| ATOM | 10140 | HA  | PRO | 677 | 65.820 | 65.597 | 71.487 | 0.00 | 0.00 |
| ATOM | 10141 | C   | PRO | 677 | 66.769 | 64.327 | 69.954 | 0.00 | 0.00 |
| ATOM | 10142 | O   | PRO | 677 | 67.713 | 63.699 | 69.673 | 0.00 | 0.00 |
| ATOM | 10143 | N   | MET | 678 | 65.564 | 64.174 | 69.376 | 0.00 | 0.00 |
| ATOM | 10144 | H   | MET | 678 | 64.870 | 64.690 | 69.897 | 0.00 | 0.00 |
| ATOM | 10145 | CA  | MET | 678 | 65.303 | 63.459 | 68.112 | 0.00 | 0.00 |
| ATOM | 10146 | HA  | MET | 678 | 66.272 | 63.131 | 67.734 | 0.00 | 0.00 |
| ATOM | 10147 | CB  | MET | 678 | 64.338 | 62.247 | 68.307 | 0.00 | 0.00 |
| ATOM | 10148 | HB2 | MET | 678 | 63.457 | 62.656 | 68.802 | 0.00 | 0.00 |
| ATOM | 10149 | HB3 | MET | 678 | 64.037 | 61.687 | 67.422 | 0.00 | 0.00 |
| ATOM | 10150 | CG  | MET | 678 | 64.882 | 61.134 | 69.300 | 0.00 | 0.00 |
| ATOM | 10151 | HG2 | MET | 678 | 64.744 | 61.480 | 70.325 | 0.00 | 0.00 |
| ATOM | 10152 | HG3 | MET | 678 | 64.195 | 60.292 | 69.214 | 0.00 | 0.00 |
| ATOM | 10153 | SD  | MET | 678 | 66.545 | 60.587 | 68.847 | 0.00 | 0.00 |
| ATOM | 10154 | CE  | MET | 678 | 67.098 | 60.023 | 70.448 | 0.00 | 0.00 |
| ATOM | 10155 | HE1 | MET | 678 | 66.532 | 60.492 | 71.253 | 0.00 | 0.00 |
| ATOM | 10156 | HE2 | MET | 678 | 67.005 | 58.940 | 70.526 | 0.00 | 0.00 |
| ATOM | 10157 | HE3 | MET | 678 | 68.176 | 60.182 | 70.479 | 0.00 | 0.00 |
| ATOM | 10158 | C   | MET | 678 | 64.859 | 64.484 | 67.065 | 0.00 | 0.00 |
| ATOM | 10159 | O   | MET | 678 | 64.575 | 65.665 | 67.303 | 0.00 | 0.00 |
| ATOM | 10160 | N   | PHE | 679 | 64.620 | 64.020 | 65.801 | 0.00 | 0.00 |
| ATOM | 10161 | H   | PHE | 679 | 64.807 | 63.039 | 65.649 | 0.00 | 0.00 |
| ATOM | 10162 | CA  | PHE | 679 | 64.226 | 64.848 | 64.611 | 0.00 | 0.00 |
| ATOM | 10163 | HA  | PHE | 679 | 64.991 | 65.609 | 64.460 | 0.00 | 0.00 |

|      |       |     |     |     |        |        |        |      |      |
|------|-------|-----|-----|-----|--------|--------|--------|------|------|
| ATOM | 10164 | CB  | PHE | 679 | 64.131 | 63.956 | 63.323 | 0.00 | 0.00 |
| ATOM | 10165 | HB2 | PHE | 679 | 63.347 | 63.213 | 63.467 | 0.00 | 0.00 |
| ATOM | 10166 | HB3 | PHE | 679 | 63.866 | 64.524 | 62.431 | 0.00 | 0.00 |
| ATOM | 10167 | CG  | PHE | 679 | 65.386 | 63.201 | 63.047 | 0.00 | 0.00 |
| ATOM | 10168 | CD1 | PHE | 679 | 65.546 | 61.886 | 63.523 | 0.00 | 0.00 |
| ATOM | 10169 | HD1 | PHE | 679 | 64.740 | 61.335 | 63.983 | 0.00 | 0.00 |
| ATOM | 10170 | CE1 | PHE | 679 | 66.784 | 61.211 | 63.418 | 0.00 | 0.00 |
| ATOM | 10171 | HE1 | PHE | 679 | 66.913 | 60.239 | 63.870 | 0.00 | 0.00 |
| ATOM | 10172 | CZ  | PHE | 679 | 67.889 | 61.804 | 62.683 | 0.00 | 0.00 |
| ATOM | 10173 | HZ  | PHE | 679 | 68.849 | 61.309 | 62.682 | 0.00 | 0.00 |
| ATOM | 10174 | CE2 | PHE | 679 | 67.738 | 63.087 | 62.102 | 0.00 | 0.00 |
| ATOM | 10175 | HE2 | PHE | 679 | 68.612 | 63.619 | 61.757 | 0.00 | 0.00 |
| ATOM | 10176 | CD2 | PHE | 679 | 66.442 | 63.734 | 62.366 | 0.00 | 0.00 |
| ATOM | 10177 | HD2 | PHE | 679 | 66.437 | 64.775 | 62.079 | 0.00 | 0.00 |
| ATOM | 10178 | C   | PHE | 679 | 62.823 | 65.488 | 64.859 | 0.00 | 0.00 |
| ATOM | 10179 | O   | PHE | 679 | 62.633 | 66.535 | 64.277 | 0.00 | 0.00 |
| ATOM | 10180 | N   | GLY | 680 | 61.935 | 65.020 | 65.749 | 0.00 | 0.00 |
| ATOM | 10181 | H   | GLY | 680 | 62.039 | 64.121 | 66.197 | 0.00 | 0.00 |
| ATOM | 10182 | CA  | GLY | 680 | 60.717 | 65.739 | 66.222 | 0.00 | 0.00 |
| ATOM | 10183 | HA2 | GLY | 680 | 60.257 | 66.001 | 65.270 | 0.00 | 0.00 |
| ATOM | 10184 | HA3 | GLY | 680 | 60.023 | 65.067 | 66.727 | 0.00 | 0.00 |
| ATOM | 10185 | C   | GLY | 680 | 60.952 | 67.065 | 66.993 | 0.00 | 0.00 |
| ATOM | 10186 | O   | GLY | 680 | 60.020 | 67.767 | 67.296 | 0.00 | 0.00 |
| ATOM | 10187 | N   | ALA | 681 | 62.162 | 67.285 | 67.471 | 0.00 | 0.00 |
| ATOM | 10188 | H   | ALA | 681 | 62.891 | 66.587 | 67.425 | 0.00 | 0.00 |
| ATOM | 10189 | CA  | ALA | 681 | 62.590 | 68.502 | 68.209 | 0.00 | 0.00 |

|      |       |      |     |     |        |        |        |      |      |
|------|-------|------|-----|-----|--------|--------|--------|------|------|
| ATOM | 10190 | HA   | ALA | 681 | 61.757 | 69.204 | 68.233 | 0.00 | 0.00 |
| ATOM | 10191 | CB   | ALA | 681 | 62.941 | 68.080 | 69.611 | 0.00 | 0.00 |
| ATOM | 10192 | HB1  | ALA | 681 | 63.212 | 68.957 | 70.199 | 0.00 | 0.00 |
| ATOM | 10193 | HB2  | ALA | 681 | 62.195 | 67.497 | 70.152 | 0.00 | 0.00 |
| ATOM | 10194 | HB3  | ALA | 681 | 63.884 | 67.535 | 69.648 | 0.00 | 0.00 |
| ATOM | 10195 | C    | ALA | 681 | 63.653 | 69.409 | 67.569 | 0.00 | 0.00 |
| ATOM | 10196 | O    | ALA | 681 | 64.297 | 70.246 | 68.180 | 0.00 | 0.00 |
| ATOM | 10197 | N    | LEU | 682 | 63.772 | 69.238 | 66.272 | 0.00 | 0.00 |
| ATOM | 10198 | H    | LEU | 682 | 63.133 | 68.607 | 65.811 | 0.00 | 0.00 |
| ATOM | 10199 | CA   | LEU | 682 | 64.686 | 69.946 | 65.335 | 0.00 | 0.00 |
| ATOM | 10200 | HA   | LEU | 682 | 65.359 | 70.567 | 65.926 | 0.00 | 0.00 |
| ATOM | 10201 | CB   | LEU | 682 | 65.595 | 68.906 | 64.826 | 0.00 | 0.00 |
| ATOM | 10202 | HB2  | LEU | 682 | 66.234 | 68.458 | 65.586 | 0.00 | 0.00 |
| ATOM | 10203 | HB3  | LEU | 682 | 64.883 | 68.172 | 64.448 | 0.00 | 0.00 |
| ATOM | 10204 | CG   | LEU | 682 | 66.457 | 69.246 | 63.617 | 0.00 | 0.00 |
| ATOM | 10205 | HG   | LEU | 682 | 65.853 | 69.483 | 62.741 | 0.00 | 0.00 |
| ATOM | 10206 | CD1  | LEU | 682 | 67.412 | 70.393 | 63.939 | 0.00 | 0.00 |
| ATOM | 10207 | 1HD1 | LEU | 682 | 68.258 | 70.527 | 63.266 | 0.00 | 0.00 |
| ATOM | 10208 | 2HD1 | LEU | 682 | 66.717 | 71.233 | 63.928 | 0.00 | 0.00 |
| ATOM | 10209 | 3HD1 | LEU | 682 | 67.883 | 70.312 | 64.919 | 0.00 | 0.00 |
| ATOM | 10210 | CD2  | LEU | 682 | 67.140 | 67.920 | 63.224 | 0.00 | 0.00 |
| ATOM | 10211 | 1HD2 | LEU | 682 | 66.420 | 67.139 | 62.979 | 0.00 | 0.00 |
| ATOM | 10212 | 2HD2 | LEU | 682 | 67.611 | 67.931 | 62.241 | 0.00 | 0.00 |
| ATOM | 10213 | 3HD2 | LEU | 682 | 67.887 | 67.679 | 63.980 | 0.00 | 0.00 |
| ATOM | 10214 | C    | LEU | 682 | 63.964 | 70.866 | 64.270 | 0.00 | 0.00 |
| ATOM | 10215 | O    | LEU | 682 | 63.232 | 70.448 | 63.397 | 0.00 | 0.00 |

|      |       |     |     |     |        |        |        |      |      |
|------|-------|-----|-----|-----|--------|--------|--------|------|------|
| ATOM | 10216 | N   | GLY | 683 | 64.244 | 72.183 | 64.262 | 0.00 | 0.00 |
| ATOM | 10217 | H   | GLY | 683 | 64.735 | 72.535 | 65.072 | 0.00 | 0.00 |
| ATOM | 10218 | CA  | GLY | 683 | 64.112 | 73.071 | 63.084 | 0.00 | 0.00 |
| ATOM | 10219 | HA2 | GLY | 683 | 64.369 | 74.039 | 63.513 | 0.00 | 0.00 |
| ATOM | 10220 | HA3 | GLY | 683 | 64.800 | 72.845 | 62.269 | 0.00 | 0.00 |
| ATOM | 10221 | C   | GLY | 683 | 62.702 | 73.164 | 62.513 | 0.00 | 0.00 |
| ATOM | 10222 | O   | GLY | 683 | 61.723 | 73.378 | 63.259 | 0.00 | 0.00 |
| ATOM | 10223 | N   | SER | 684 | 62.566 | 72.971 | 61.162 | 0.00 | 0.00 |
| ATOM | 10224 | H   | SER | 684 | 63.384 | 72.735 | 60.618 | 0.00 | 0.00 |
| ATOM | 10225 | CA  | SER | 684 | 61.347 | 73.075 | 60.391 | 0.00 | 0.00 |
| ATOM | 10226 | HA  | SER | 684 | 61.056 | 74.088 | 60.668 | 0.00 | 0.00 |
| ATOM | 10227 | CB  | SER | 684 | 61.567 | 73.158 | 58.837 | 0.00 | 0.00 |
| ATOM | 10228 | HB2 | SER | 684 | 61.879 | 72.222 | 58.374 | 0.00 | 0.00 |
| ATOM | 10229 | HB3 | SER | 684 | 60.756 | 73.540 | 58.217 | 0.00 | 0.00 |
| ATOM | 10230 | OG  | SER | 684 | 62.532 | 74.111 | 58.607 | 0.00 | 0.00 |
| ATOM | 10231 | HG  | SER | 684 | 62.233 | 74.837 | 59.159 | 0.00 | 0.00 |
| ATOM | 10232 | C   | SER | 684 | 60.259 | 72.056 | 60.838 | 0.00 | 0.00 |
| ATOM | 10233 | O   | SER | 684 | 59.046 | 72.304 | 60.607 | 0.00 | 0.00 |
| ATOM | 10234 | N   | ALA | 685 | 60.733 | 70.991 | 61.514 | 0.00 | 0.00 |
| ATOM | 10235 | H   | ALA | 685 | 61.738 | 70.894 | 61.534 | 0.00 | 0.00 |
| ATOM | 10236 | CA  | ALA | 685 | 59.960 | 69.836 | 62.062 | 0.00 | 0.00 |
| ATOM | 10237 | HA  | ALA | 685 | 59.144 | 69.642 | 61.366 | 0.00 | 0.00 |
| ATOM | 10238 | CB  | ALA | 685 | 60.768 | 68.548 | 62.085 | 0.00 | 0.00 |
| ATOM | 10239 | HB1 | ALA | 685 | 61.537 | 68.631 | 62.854 | 0.00 | 0.00 |
| ATOM | 10240 | HB2 | ALA | 685 | 60.014 | 67.798 | 62.326 | 0.00 | 0.00 |
| ATOM | 10241 | HB3 | ALA | 685 | 61.291 | 68.412 | 61.139 | 0.00 | 0.00 |

|      |       |      |     |     |        |        |        |      |      |
|------|-------|------|-----|-----|--------|--------|--------|------|------|
| ATOM | 10242 | C    | ALA | 685 | 59.230 | 70.280 | 63.379 | 0.00 | 0.00 |
| ATOM | 10243 | O    | ALA | 685 | 58.083 | 70.038 | 63.631 | 0.00 | 0.00 |
| ATOM | 10244 | N    | ARG | 686 | 59.969 | 71.025 | 64.238 | 0.00 | 0.00 |
| ATOM | 10245 | H    | ARG | 686 | 60.842 | 71.467 | 63.986 | 0.00 | 0.00 |
| ATOM | 10246 | CA   | ARG | 686 | 59.478 | 71.373 | 65.607 | 0.00 | 0.00 |
| ATOM | 10247 | HA   | ARG | 686 | 59.139 | 70.435 | 66.048 | 0.00 | 0.00 |
| ATOM | 10248 | CB   | ARG | 686 | 60.668 | 71.975 | 66.417 | 0.00 | 0.00 |
| ATOM | 10249 | HB2  | ARG | 686 | 61.409 | 71.202 | 66.213 | 0.00 | 0.00 |
| ATOM | 10250 | HB3  | ARG | 686 | 61.077 | 72.896 | 66.001 | 0.00 | 0.00 |
| ATOM | 10251 | CG   | ARG | 686 | 60.330 | 72.297 | 67.883 | 0.00 | 0.00 |
| ATOM | 10252 | HG2  | ARG | 686 | 60.385 | 71.351 | 68.421 | 0.00 | 0.00 |
| ATOM | 10253 | HG3  | ARG | 686 | 59.307 | 72.673 | 67.920 | 0.00 | 0.00 |
| ATOM | 10254 | CD   | ARG | 686 | 61.291 | 73.319 | 68.458 | 0.00 | 0.00 |
| ATOM | 10255 | HD2  | ARG | 686 | 61.438 | 74.121 | 67.733 | 0.00 | 0.00 |
| ATOM | 10256 | HD3  | ARG | 686 | 60.858 | 73.855 | 69.303 | 0.00 | 0.00 |
| ATOM | 10257 | NE   | ARG | 686 | 62.588 | 72.716 | 68.766 | 0.00 | 0.00 |
| ATOM | 10258 | HE   | ARG | 686 | 62.922 | 71.947 | 68.204 | 0.00 | 0.00 |
| ATOM | 10259 | CZ   | ARG | 686 | 63.165 | 72.861 | 69.954 | 0.00 | 0.00 |
| ATOM | 10260 | NH1  | ARG | 686 | 62.864 | 73.875 | 70.689 | 0.00 | 0.00 |
| ATOM | 10261 | 1HH1 | ARG | 686 | 63.608 | 74.107 | 71.333 | 0.00 | 0.00 |
| ATOM | 10262 | 2HH1 | ARG | 686 | 62.330 | 74.683 | 70.402 | 0.00 | 0.00 |
| ATOM | 10263 | NH2  | ARG | 686 | 64.078 | 71.961 | 70.304 | 0.00 | 0.00 |
| ATOM | 10264 | 1HH2 | ARG | 686 | 64.534 | 72.159 | 71.183 | 0.00 | 0.00 |
| ATOM | 10265 | 2HH2 | ARG | 686 | 64.498 | 71.263 | 69.708 | 0.00 | 0.00 |
| ATOM | 10266 | C    | ARG | 686 | 58.303 | 72.381 | 65.609 | 0.00 | 0.00 |
| ATOM | 10267 | O    | ARG | 686 | 57.408 | 72.269 | 66.402 | 0.00 | 0.00 |

|      |       |     |     |     |        |        |        |      |      |
|------|-------|-----|-----|-----|--------|--------|--------|------|------|
| ATOM | 10268 | N   | HIE | 687 | 58.406 | 73.327 | 64.701 | 0.00 | 0.00 |
| ATOM | 10269 | H   | HIE | 687 | 59.319 | 73.545 | 64.327 | 0.00 | 0.00 |
| ATOM | 10270 | CA  | HIE | 687 | 57.248 | 74.149 | 64.270 | 0.00 | 0.00 |
| ATOM | 10271 | HA  | HIE | 687 | 56.930 | 74.819 | 65.069 | 0.00 | 0.00 |
| ATOM | 10272 | CB  | HIE | 687 | 57.695 | 74.983 | 63.072 | 0.00 | 0.00 |
| ATOM | 10273 | HB2 | HIE | 687 | 58.173 | 74.320 | 62.352 | 0.00 | 0.00 |
| ATOM | 10274 | HB3 | HIE | 687 | 56.846 | 75.448 | 62.571 | 0.00 | 0.00 |
| ATOM | 10275 | CG  | HIE | 687 | 58.635 | 76.176 | 63.469 | 0.00 | 0.00 |
| ATOM | 10276 | ND1 | HIE | 687 | 60.003 | 76.394 | 63.155 | 0.00 | 0.00 |
| ATOM | 10277 | CE1 | HIE | 687 | 60.200 | 77.635 | 63.694 | 0.00 | 0.00 |
| ATOM | 10278 | HE1 | HIE | 687 | 61.148 | 78.151 | 63.668 | 0.00 | 0.00 |
| ATOM | 10279 | NE2 | HIE | 687 | 59.108 | 78.130 | 64.284 | 0.00 | 0.00 |
| ATOM | 10280 | HE2 | HIE | 687 | 58.937 | 79.052 | 64.659 | 0.00 | 0.00 |
| ATOM | 10281 | CD2 | HIE | 687 | 58.102 | 77.263 | 64.105 | 0.00 | 0.00 |
| ATOM | 10282 | HD2 | HIE | 687 | 57.081 | 77.365 | 64.441 | 0.00 | 0.00 |
| ATOM | 10283 | C   | HIE | 687 | 56.004 | 73.429 | 63.777 | 0.00 | 0.00 |
| ATOM | 10284 | O   | HIE | 687 | 54.910 | 73.896 | 64.092 | 0.00 | 0.00 |
| ATOM | 10285 | N   | HIE | 688 | 56.105 | 72.248 | 63.110 | 0.00 | 0.00 |
| ATOM | 10286 | H   | HIE | 688 | 57.004 | 72.106 | 62.670 | 0.00 | 0.00 |
| ATOM | 10287 | CA  | HIE | 688 | 54.968 | 71.478 | 62.638 | 0.00 | 0.00 |
| ATOM | 10288 | HA  | HIE | 688 | 54.284 | 72.194 | 62.183 | 0.00 | 0.00 |
| ATOM | 10289 | CB  | HIE | 688 | 55.539 | 70.634 | 61.518 | 0.00 | 0.00 |
| ATOM | 10290 | HB2 | HIE | 688 | 56.081 | 71.221 | 60.777 | 0.00 | 0.00 |
| ATOM | 10291 | HB3 | HIE | 688 | 56.164 | 69.870 | 61.981 | 0.00 | 0.00 |
| ATOM | 10292 | CG  | HIE | 688 | 54.426 | 69.909 | 60.850 | 0.00 | 0.00 |
| ATOM | 10293 | ND1 | HIE | 688 | 53.661 | 70.402 | 59.771 | 0.00 | 0.00 |

|      |       |     |     |     |        |        |        |      |      |
|------|-------|-----|-----|-----|--------|--------|--------|------|------|
| ATOM | 10294 | CE1 | HIE | 688 | 52.860 | 69.376 | 59.437 | 0.00 | 0.00 |
| ATOM | 10295 | HE1 | HIE | 688 | 52.074 | 69.487 | 58.705 | 0.00 | 0.00 |
| ATOM | 10296 | NE2 | HIE | 688 | 53.023 | 68.318 | 60.189 | 0.00 | 0.00 |
| ATOM | 10297 | HE2 | HIE | 688 | 52.227 | 67.751 | 60.445 | 0.00 | 0.00 |
| ATOM | 10298 | CD2 | HIE | 688 | 54.051 | 68.580 | 61.082 | 0.00 | 0.00 |
| ATOM | 10299 | HD2 | HIE | 688 | 54.555 | 67.914 | 61.767 | 0.00 | 0.00 |
| ATOM | 10300 | C   | HIE | 688 | 54.294 | 70.657 | 63.685 | 0.00 | 0.00 |
| ATOM | 10301 | O   | HIE | 688 | 53.065 | 70.365 | 63.657 | 0.00 | 0.00 |
| ATOM | 10302 | N   | CYS | 689 | 55.148 | 70.215 | 64.628 | 0.00 | 0.00 |
| ATOM | 10303 | H   | CYS | 689 | 56.080 | 70.570 | 64.470 | 0.00 | 0.00 |
| ATOM | 10304 | CA  | CYS | 689 | 54.878 | 69.231 | 65.668 | 0.00 | 0.00 |
| ATOM | 10305 | HA  | CYS | 689 | 54.128 | 68.525 | 65.311 | 0.00 | 0.00 |
| ATOM | 10306 | CB  | CYS | 689 | 56.162 | 68.389 | 65.921 | 0.00 | 0.00 |
| ATOM | 10307 | HB2 | CYS | 689 | 56.967 | 69.122 | 65.972 | 0.00 | 0.00 |
| ATOM | 10308 | HB3 | CYS | 689 | 56.011 | 67.798 | 66.825 | 0.00 | 0.00 |
| ATOM | 10309 | SG  | CYS | 689 | 56.432 | 67.149 | 64.636 | 0.00 | 0.00 |
| ATOM | 10310 | HG  | CYS | 689 | 55.956 | 66.168 | 65.408 | 0.00 | 0.00 |
| ATOM | 10311 | C   | CYS | 689 | 54.256 | 69.790 | 66.987 | 0.00 | 0.00 |
| ATOM | 10312 | O   | CYS | 689 | 53.840 | 69.009 | 67.870 | 0.00 | 0.00 |
| ATOM | 10313 | N   | ARG | 690 | 54.230 | 71.125 | 67.131 | 0.00 | 0.00 |
| ATOM | 10314 | H   | ARG | 690 | 54.532 | 71.645 | 66.319 | 0.00 | 0.00 |
| ATOM | 10315 | CA  | ARG | 690 | 53.651 | 71.921 | 68.202 | 0.00 | 0.00 |
| ATOM | 10316 | HA  | ARG | 690 | 53.352 | 71.175 | 68.939 | 0.00 | 0.00 |
| ATOM | 10317 | CB  | ARG | 690 | 54.690 | 72.779 | 68.768 | 0.00 | 0.00 |
| ATOM | 10318 | HB2 | ARG | 690 | 54.279 | 73.209 | 69.682 | 0.00 | 0.00 |
| ATOM | 10319 | HB3 | ARG | 690 | 55.469 | 72.046 | 68.979 | 0.00 | 0.00 |



|      |       |      |     |     |        |        |        |      |      |
|------|-------|------|-----|-----|--------|--------|--------|------|------|
| ATOM | 10320 | CG   | ARG | 690 | 55.086 | 73.935 | 67.755 | 0.00 | 0.00 |
| ATOM | 10321 | HG2  | ARG | 690 | 55.250 | 73.592 | 66.734 | 0.00 | 0.00 |
| ATOM | 10322 | HG3  | ARG | 690 | 54.212 | 74.575 | 67.632 | 0.00 | 0.00 |
| ATOM | 10323 | CD   | ARG | 690 | 56.213 | 74.744 | 68.349 | 0.00 | 0.00 |
| ATOM | 10324 | HD2  | ARG | 690 | 57.165 | 74.214 | 68.345 | 0.00 | 0.00 |
| ATOM | 10325 | HD3  | ARG | 690 | 56.465 | 75.520 | 67.626 | 0.00 | 0.00 |
| ATOM | 10326 | NE   | ARG | 690 | 55.919 | 75.362 | 69.618 | 0.00 | 0.00 |
| ATOM | 10327 | HE   | ARG | 690 | 56.406 | 74.983 | 70.417 | 0.00 | 0.00 |
| ATOM | 10328 | CZ   | ARG | 690 | 54.950 | 76.183 | 69.854 | 0.00 | 0.00 |
| ATOM | 10329 | NH1  | ARG | 690 | 54.265 | 76.822 | 68.935 | 0.00 | 0.00 |
| ATOM | 10330 | 1HH1 | ARG | 690 | 53.590 | 77.471 | 69.314 | 0.00 | 0.00 |
| ATOM | 10331 | 2HH1 | ARG | 690 | 54.516 | 76.803 | 67.957 | 0.00 | 0.00 |
| ATOM | 10332 | NH2  | ARG | 690 | 54.588 | 76.583 | 71.069 | 0.00 | 0.00 |
| ATOM | 10333 | 1HH2 | ARG | 690 | 54.173 | 77.480 | 71.276 | 0.00 | 0.00 |
| ATOM | 10334 | 2HH2 | ARG | 690 | 54.959 | 76.042 | 71.837 | 0.00 | 0.00 |
| ATOM | 10335 | C    | ARG | 690 | 52.365 | 72.673 | 67.639 | 0.00 | 0.00 |
| ATOM | 10336 | O    | ARG | 690 | 52.203 | 72.772 | 66.452 | 0.00 | 0.00 |
| ATOM | 10337 | N    | LEU | 691 | 51.566 | 73.163 | 68.629 | 0.00 | 0.00 |
| ATOM | 10338 | H    | LEU | 691 | 51.899 | 72.930 | 69.554 | 0.00 | 0.00 |
| ATOM | 10339 | CA   | LEU | 691 | 50.483 | 74.176 | 68.402 | 0.00 | 0.00 |
| ATOM | 10340 | HA   | LEU | 691 | 50.560 | 74.496 | 67.362 | 0.00 | 0.00 |
| ATOM | 10341 | CB   | LEU | 691 | 49.129 | 73.528 | 68.878 | 0.00 | 0.00 |
| ATOM | 10342 | HB2  | LEU | 691 | 49.090 | 73.057 | 69.860 | 0.00 | 0.00 |
| ATOM | 10343 | HB3  | LEU | 691 | 48.312 | 74.247 | 68.821 | 0.00 | 0.00 |
| ATOM | 10344 | CG   | LEU | 691 | 48.668 | 72.400 | 67.955 | 0.00 | 0.00 |
| ATOM | 10345 | HG   | LEU | 691 | 49.315 | 71.554 | 68.189 | 0.00 | 0.00 |

|      |       |      |     |     |        |        |        |      |      |
|------|-------|------|-----|-----|--------|--------|--------|------|------|
| ATOM | 10346 | CD1  | LEU | 691 | 47.264 | 71.886 | 68.349 | 0.00 | 0.00 |
| ATOM | 10347 | 1HD1 | LEU | 691 | 47.247 | 71.602 | 69.401 | 0.00 | 0.00 |
| ATOM | 10348 | 2HD1 | LEU | 691 | 46.579 | 72.721 | 68.197 | 0.00 | 0.00 |
| ATOM | 10349 | 3HD1 | LEU | 691 | 46.951 | 71.109 | 67.651 | 0.00 | 0.00 |
| ATOM | 10350 | CD2  | LEU | 691 | 48.586 | 72.810 | 66.440 | 0.00 | 0.00 |
| ATOM | 10351 | 1HD2 | LEU | 691 | 48.030 | 72.124 | 65.802 | 0.00 | 0.00 |
| ATOM | 10352 | 2HD2 | LEU | 691 | 48.177 | 73.812 | 66.307 | 0.00 | 0.00 |
| ATOM | 10353 | 3HD2 | LEU | 691 | 49.573 | 72.885 | 65.984 | 0.00 | 0.00 |
| ATOM | 10354 | C    | LEU | 691 | 50.558 | 75.445 | 69.202 | 0.00 | 0.00 |
| ATOM | 10355 | O    | LEU | 691 | 51.052 | 75.397 | 70.355 | 0.00 | 0.00 |
| ATOM | 10356 | N    | THR | 692 | 49.991 | 76.581 | 68.721 | 0.00 | 0.00 |
| ATOM | 10357 | H    | THR | 692 | 49.646 | 76.552 | 67.772 | 0.00 | 0.00 |
| ATOM | 10358 | CA   | THR | 692 | 49.884 | 77.894 | 69.436 | 0.00 | 0.00 |
| ATOM | 10359 | HA   | THR | 692 | 50.358 | 77.824 | 70.415 | 0.00 | 0.00 |
| ATOM | 10360 | CB   | THR | 692 | 50.537 | 79.007 | 68.692 | 0.00 | 0.00 |
| ATOM | 10361 | HB   | THR | 692 | 49.940 | 79.235 | 67.810 | 0.00 | 0.00 |
| ATOM | 10362 | CG2  | THR | 692 | 50.659 | 80.349 | 69.472 | 0.00 | 0.00 |
| ATOM | 10363 | 1HG2 | THR | 692 | 51.498 | 80.853 | 68.991 | 0.00 | 0.00 |
| ATOM | 10364 | 2HG2 | THR | 692 | 49.847 | 81.076 | 69.502 | 0.00 | 0.00 |
| ATOM | 10365 | 3HG2 | THR | 692 | 50.862 | 80.205 | 70.533 | 0.00 | 0.00 |
| ATOM | 10366 | OG1  | THR | 692 | 51.853 | 78.495 | 68.324 | 0.00 | 0.00 |
| ATOM | 10367 | HG1  | THR | 692 | 52.295 | 79.063 | 67.690 | 0.00 | 0.00 |
| ATOM | 10368 | C    | THR | 692 | 48.429 | 78.130 | 69.672 | 0.00 | 0.00 |
| ATOM | 10369 | O    | THR | 692 | 47.578 | 78.072 | 68.801 | 0.00 | 0.00 |
| ATOM | 10370 | N    | PHE | 693 | 48.110 | 78.493 | 70.931 | 0.00 | 0.00 |
| ATOM | 10371 | H    | PHE | 693 | 48.834 | 78.396 | 71.628 | 0.00 | 0.00 |

|      |       |     |     |     |        |        |        |      |      |
|------|-------|-----|-----|-----|--------|--------|--------|------|------|
| ATOM | 10372 | CA  | PHE | 693 | 46.795 | 78.875 | 71.328 | 0.00 | 0.00 |
| ATOM | 10373 | HA  | PHE | 693 | 46.066 | 78.679 | 70.542 | 0.00 | 0.00 |
| ATOM | 10374 | CB  | PHE | 693 | 46.398 | 78.138 | 72.588 | 0.00 | 0.00 |
| ATOM | 10375 | HB2 | PHE | 693 | 47.032 | 78.656 | 73.308 | 0.00 | 0.00 |
| ATOM | 10376 | HB3 | PHE | 693 | 45.340 | 78.337 | 72.761 | 0.00 | 0.00 |
| ATOM | 10377 | CG  | PHE | 693 | 46.662 | 76.696 | 72.554 | 0.00 | 0.00 |
| ATOM | 10378 | CD1 | PHE | 693 | 47.840 | 76.113 | 73.163 | 0.00 | 0.00 |
| ATOM | 10379 | HD1 | PHE | 693 | 48.537 | 76.771 | 73.662 | 0.00 | 0.00 |
| ATOM | 10380 | CE1 | PHE | 693 | 48.103 | 74.727 | 72.915 | 0.00 | 0.00 |
| ATOM | 10381 | HE1 | PHE | 693 | 48.974 | 74.246 | 73.335 | 0.00 | 0.00 |
| ATOM | 10382 | CZ  | PHE | 693 | 47.169 | 74.058 | 72.206 | 0.00 | 0.00 |
| ATOM | 10383 | HZ  | PHE | 693 | 47.513 | 73.045 | 72.059 | 0.00 | 0.00 |
| ATOM | 10384 | CE2 | PHE | 693 | 46.031 | 74.648 | 71.553 | 0.00 | 0.00 |
| ATOM | 10385 | HE2 | PHE | 693 | 45.356 | 74.031 | 70.978 | 0.00 | 0.00 |
| ATOM | 10386 | CD2 | PHE | 693 | 45.778 | 76.011 | 71.750 | 0.00 | 0.00 |
| ATOM | 10387 | HD2 | PHE | 693 | 44.934 | 76.490 | 71.274 | 0.00 | 0.00 |
| ATOM | 10388 | C   | PHE | 693 | 46.745 | 80.431 | 71.484 | 0.00 | 0.00 |
| ATOM | 10389 | O   | PHE | 693 | 47.431 | 81.055 | 72.304 | 0.00 | 0.00 |
| ATOM | 10390 | N   | LEU | 694 | 45.812 | 81.083 | 70.739 | 0.00 | 0.00 |
| ATOM | 10391 | H   | LEU | 694 | 45.414 | 80.511 | 70.008 | 0.00 | 0.00 |
| ATOM | 10392 | CA  | LEU | 694 | 45.577 | 82.495 | 70.788 | 0.00 | 0.00 |
| ATOM | 10393 | HA  | LEU | 694 | 46.281 | 82.974 | 71.468 | 0.00 | 0.00 |
| ATOM | 10394 | CB  | LEU | 694 | 45.794 | 83.098 | 69.359 | 0.00 | 0.00 |
| ATOM | 10395 | HB2 | LEU | 694 | 45.100 | 82.566 | 68.708 | 0.00 | 0.00 |
| ATOM | 10396 | HB3 | LEU | 694 | 45.452 | 84.133 | 69.364 | 0.00 | 0.00 |
| ATOM | 10397 | CG  | LEU | 694 | 47.253 | 82.913 | 68.753 | 0.00 | 0.00 |

|      |       |      |     |     |        |        |        |      |      |
|------|-------|------|-----|-----|--------|--------|--------|------|------|
| ATOM | 10398 | HG   | LEU | 694 | 47.650 | 81.898 | 68.736 | 0.00 | 0.00 |
| ATOM | 10399 | CD1  | LEU | 694 | 47.264 | 83.528 | 67.321 | 0.00 | 0.00 |
| ATOM | 10400 | 1HD1 | LEU | 694 | 46.582 | 84.354 | 67.122 | 0.00 | 0.00 |
| ATOM | 10401 | 2HD1 | LEU | 694 | 48.315 | 83.722 | 67.105 | 0.00 | 0.00 |
| ATOM | 10402 | 3HD1 | LEU | 694 | 46.890 | 82.734 | 66.675 | 0.00 | 0.00 |
| ATOM | 10403 | CD2  | LEU | 694 | 48.433 | 83.488 | 69.596 | 0.00 | 0.00 |
| ATOM | 10404 | 1HD2 | LEU | 694 | 48.594 | 82.929 | 70.518 | 0.00 | 0.00 |
| ATOM | 10405 | 2HD2 | LEU | 694 | 49.361 | 83.431 | 69.027 | 0.00 | 0.00 |
| ATOM | 10406 | 3HD2 | LEU | 694 | 48.124 | 84.487 | 69.903 | 0.00 | 0.00 |
| ATOM | 10407 | C    | LEU | 694 | 44.084 | 82.705 | 71.215 | 0.00 | 0.00 |
| ATOM | 10408 | O    | LEU | 694 | 43.272 | 81.905 | 70.914 | 0.00 | 0.00 |
| ATOM | 10409 | N    | SER | 695 | 43.762 | 83.858 | 71.776 | 0.00 | 0.00 |
| ATOM | 10410 | H    | SER | 695 | 44.459 | 84.583 | 71.870 | 0.00 | 0.00 |
| ATOM | 10411 | CA   | SER | 695 | 42.346 | 84.347 | 71.863 | 0.00 | 0.00 |
| ATOM | 10412 | HA   | SER | 695 | 41.750 | 83.612 | 72.403 | 0.00 | 0.00 |
| ATOM | 10413 | CB   | SER | 695 | 42.329 | 85.628 | 72.733 | 0.00 | 0.00 |
| ATOM | 10414 | HB2  | SER | 695 | 41.407 | 86.205 | 72.802 | 0.00 | 0.00 |
| ATOM | 10415 | HB3  | SER | 695 | 42.615 | 85.412 | 73.762 | 0.00 | 0.00 |
| ATOM | 10416 | OG   | SER | 695 | 43.257 | 86.489 | 72.121 | 0.00 | 0.00 |
| ATOM | 10417 | HG   | SER | 695 | 43.749 | 87.000 | 72.768 | 0.00 | 0.00 |
| ATOM | 10418 | C    | SER | 695 | 41.715 | 84.539 | 70.492 | 0.00 | 0.00 |
| ATOM | 10419 | O    | SER | 695 | 42.418 | 84.846 | 69.512 | 0.00 | 0.00 |
| ATOM | 10420 | N    | GLN | 696 | 40.365 | 84.509 | 70.523 | 0.00 | 0.00 |
| ATOM | 10421 | H    | GLN | 696 | 39.955 | 84.243 | 71.407 | 0.00 | 0.00 |
| ATOM | 10422 | CA   | GLN | 696 | 39.439 | 84.796 | 69.401 | 0.00 | 0.00 |
| ATOM | 10423 | HA   | GLN | 696 | 39.506 | 84.090 | 68.573 | 0.00 | 0.00 |

|      |       |      |     |     |        |        |        |      |      |
|------|-------|------|-----|-----|--------|--------|--------|------|------|
| ATOM | 10424 | CB   | GLN | 696 | 38.004 | 84.641 | 69.928 | 0.00 | 0.00 |
| ATOM | 10425 | HB2  | GLN | 696 | 37.894 | 85.188 | 70.865 | 0.00 | 0.00 |
| ATOM | 10426 | HB3  | GLN | 696 | 37.308 | 84.996 | 69.168 | 0.00 | 0.00 |
| ATOM | 10427 | CG   | GLN | 696 | 37.505 | 83.263 | 70.363 | 0.00 | 0.00 |
| ATOM | 10428 | HG2  | GLN | 696 | 37.450 | 82.610 | 69.493 | 0.00 | 0.00 |
| ATOM | 10429 | HG3  | GLN | 696 | 38.321 | 82.786 | 70.904 | 0.00 | 0.00 |
| ATOM | 10430 | CD   | GLN | 696 | 36.220 | 83.168 | 71.220 | 0.00 | 0.00 |
| ATOM | 10431 | OE1  | GLN | 696 | 35.402 | 84.092 | 71.307 | 0.00 | 0.00 |
| ATOM | 10432 | NE2  | GLN | 696 | 36.037 | 82.050 | 71.855 | 0.00 | 0.00 |
| ATOM | 10433 | 1HE2 | GLN | 696 | 35.444 | 82.076 | 72.672 | 0.00 | 0.00 |
| ATOM | 10434 | 2HE2 | GLN | 696 | 36.759 | 81.346 | 71.902 | 0.00 | 0.00 |
| ATOM | 10435 | C    | GLN | 696 | 39.667 | 86.239 | 68.911 | 0.00 | 0.00 |
| ATOM | 10436 | O    | GLN | 696 | 39.781 | 86.517 | 67.735 | 0.00 | 0.00 |
| ATOM | 10437 | N    | ALA | 697 | 39.855 | 87.189 | 69.851 | 0.00 | 0.00 |
| ATOM | 10438 | H    | ALA | 697 | 39.751 | 86.903 | 70.814 | 0.00 | 0.00 |
| ATOM | 10439 | CA   | ALA | 697 | 40.208 | 88.566 | 69.483 | 0.00 | 0.00 |
| ATOM | 10440 | HA   | ALA | 697 | 39.477 | 88.921 | 68.757 | 0.00 | 0.00 |
| ATOM | 10441 | CB   | ALA | 697 | 40.083 | 89.351 | 70.815 | 0.00 | 0.00 |
| ATOM | 10442 | HB1  | ALA | 697 | 40.616 | 88.778 | 71.575 | 0.00 | 0.00 |
| ATOM | 10443 | HB2  | ALA | 697 | 40.566 | 90.325 | 70.742 | 0.00 | 0.00 |
| ATOM | 10444 | HB3  | ALA | 697 | 39.029 | 89.448 | 71.074 | 0.00 | 0.00 |
| ATOM | 10445 | C    | ALA | 697 | 41.591 | 88.803 | 68.908 | 0.00 | 0.00 |
| ATOM | 10446 | O    | ALA | 697 | 41.792 | 89.578 | 67.981 | 0.00 | 0.00 |
| ATOM | 10447 | N    | ALA | 698 | 42.650 | 88.136 | 69.339 | 0.00 | 0.00 |
| ATOM | 10448 | H    | ALA | 698 | 42.375 | 87.509 | 70.081 | 0.00 | 0.00 |
| ATOM | 10449 | CA   | ALA | 698 | 43.951 | 88.143 | 68.659 | 0.00 | 0.00 |

|      |       |     |     |     |        |        |        |      |      |
|------|-------|-----|-----|-----|--------|--------|--------|------|------|
| ATOM | 10450 | HA  | ALA | 698 | 44.259 | 89.129 | 68.312 | 0.00 | 0.00 |
| ATOM | 10451 | CB  | ALA | 698 | 45.095 | 87.675 | 69.649 | 0.00 | 0.00 |
| ATOM | 10452 | HB1 | ALA | 698 | 44.995 | 86.597 | 69.776 | 0.00 | 0.00 |
| ATOM | 10453 | HB2 | ALA | 698 | 46.010 | 87.734 | 69.060 | 0.00 | 0.00 |
| ATOM | 10454 | HB3 | ALA | 698 | 45.066 | 88.369 | 70.489 | 0.00 | 0.00 |
| ATOM | 10455 | C   | ALA | 698 | 43.972 | 87.368 | 67.327 | 0.00 | 0.00 |
| ATOM | 10456 | O   | ALA | 698 | 44.662 | 87.803 | 66.365 | 0.00 | 0.00 |
| ATOM | 10457 | N   | ALA | 699 | 43.229 | 86.262 | 67.193 | 0.00 | 0.00 |
| ATOM | 10458 | H   | ALA | 699 | 42.714 | 85.933 | 67.997 | 0.00 | 0.00 |
| ATOM | 10459 | CA  | ALA | 699 | 43.031 | 85.627 | 65.858 | 0.00 | 0.00 |
| ATOM | 10460 | HA  | ALA | 699 | 44.031 | 85.583 | 65.428 | 0.00 | 0.00 |
| ATOM | 10461 | CB  | ALA | 699 | 42.568 | 84.160 | 65.930 | 0.00 | 0.00 |
| ATOM | 10462 | HB1 | ALA | 699 | 43.059 | 83.737 | 66.806 | 0.00 | 0.00 |
| ATOM | 10463 | HB2 | ALA | 699 | 41.486 | 84.040 | 65.977 | 0.00 | 0.00 |
| ATOM | 10464 | HB3 | ALA | 699 | 42.850 | 83.667 | 64.999 | 0.00 | 0.00 |
| ATOM | 10465 | C   | ALA | 699 | 42.263 | 86.458 | 64.862 | 0.00 | 0.00 |
| ATOM | 10466 | O   | ALA | 699 | 42.593 | 86.535 | 63.690 | 0.00 | 0.00 |
| ATOM | 10467 | N   | ALA | 700 | 41.311 | 87.278 | 65.247 | 0.00 | 0.00 |
| ATOM | 10468 | H   | ALA | 700 | 40.991 | 87.105 | 66.189 | 0.00 | 0.00 |
| ATOM | 10469 | CA  | ALA | 700 | 40.563 | 88.298 | 64.463 | 0.00 | 0.00 |
| ATOM | 10470 | HA  | ALA | 700 | 40.314 | 87.877 | 63.489 | 0.00 | 0.00 |
| ATOM | 10471 | CB  | ALA | 700 | 39.265 | 88.807 | 65.129 | 0.00 | 0.00 |
| ATOM | 10472 | HB1 | ALA | 700 | 39.418 | 89.389 | 66.039 | 0.00 | 0.00 |
| ATOM | 10473 | HB2 | ALA | 700 | 38.589 | 89.384 | 64.498 | 0.00 | 0.00 |
| ATOM | 10474 | HB3 | ALA | 700 | 38.668 | 87.967 | 65.484 | 0.00 | 0.00 |
| ATOM | 10475 | C   | ALA | 700 | 41.445 | 89.541 | 64.102 | 0.00 | 0.00 |

|      |       |      |     |     |        |        |        |      |      |
|------|-------|------|-----|-----|--------|--------|--------|------|------|
| ATOM | 10476 | O    | ALA | 700 | 41.030 | 90.290 | 63.151 | 0.00 | 0.00 |
| ATOM | 10477 | N    | ASN | 701 | 42.632 | 89.696 | 64.688 | 0.00 | 0.00 |
| ATOM | 10478 | H    | ASN | 701 | 42.708 | 89.184 | 65.555 | 0.00 | 0.00 |
| ATOM | 10479 | CA   | ASN | 701 | 43.641 | 90.686 | 64.462 | 0.00 | 0.00 |
| ATOM | 10480 | HA   | ASN | 701 | 43.316 | 91.622 | 64.007 | 0.00 | 0.00 |
| ATOM | 10481 | CB   | ASN | 701 | 44.258 | 91.161 | 65.892 | 0.00 | 0.00 |
| ATOM | 10482 | HB2  | ASN | 701 | 43.368 | 91.284 | 66.508 | 0.00 | 0.00 |
| ATOM | 10483 | HB3  | ASN | 701 | 44.898 | 90.360 | 66.263 | 0.00 | 0.00 |
| ATOM | 10484 | CG   | ASN | 701 | 45.067 | 92.413 | 65.792 | 0.00 | 0.00 |
| ATOM | 10485 | OD1  | ASN | 701 | 44.970 | 93.313 | 64.999 | 0.00 | 0.00 |
| ATOM | 10486 | ND2  | ASN | 701 | 46.016 | 92.450 | 66.637 | 0.00 | 0.00 |
| ATOM | 10487 | 1HD2 | ASN | 701 | 46.586 | 93.271 | 66.785 | 0.00 | 0.00 |
| ATOM | 10488 | 2HD2 | ASN | 701 | 46.061 | 91.728 | 67.342 | 0.00 | 0.00 |
| ATOM | 10489 | C    | ASN | 701 | 44.737 | 90.081 | 63.536 | 0.00 | 0.00 |
| ATOM | 10490 | O    | ASN | 701 | 45.572 | 90.817 | 62.989 | 0.00 | 0.00 |
| ATOM | 10491 | N    | GLY | 702 | 44.882 | 88.772 | 63.403 | 0.00 | 0.00 |
| ATOM | 10492 | H    | GLY | 702 | 44.349 | 88.230 | 64.068 | 0.00 | 0.00 |
| ATOM | 10493 | CA   | GLY | 702 | 45.965 | 88.115 | 62.649 | 0.00 | 0.00 |
| ATOM | 10494 | HA2  | GLY | 702 | 45.694 | 87.077 | 62.452 | 0.00 | 0.00 |
| ATOM | 10495 | HA3  | GLY | 702 | 46.056 | 88.560 | 61.658 | 0.00 | 0.00 |
| ATOM | 10496 | C    | GLY | 702 | 47.366 | 88.114 | 63.148 | 0.00 | 0.00 |
| ATOM | 10497 | O    | GLY | 702 | 48.337 | 88.030 | 62.355 | 0.00 | 0.00 |
| ATOM | 10498 | N    | VAL | 703 | 47.543 | 88.170 | 64.481 | 0.00 | 0.00 |
| ATOM | 10499 | H    | VAL | 703 | 46.742 | 88.348 | 65.070 | 0.00 | 0.00 |
| ATOM | 10500 | CA   | VAL | 703 | 48.889 | 88.309 | 65.128 | 0.00 | 0.00 |
| ATOM | 10501 | HA   | VAL | 703 | 49.199 | 89.255 | 64.684 | 0.00 | 0.00 |

|      |       |      |     |     |        |        |        |      |      |
|------|-------|------|-----|-----|--------|--------|--------|------|------|
| ATOM | 10502 | CB   | VAL | 703 | 48.897 | 88.487 | 66.644 | 0.00 | 0.00 |
| ATOM | 10503 | HB   | VAL | 703 | 49.914 | 88.783 | 66.901 | 0.00 | 0.00 |
| ATOM | 10504 | CG1  | VAL | 703 | 47.971 | 89.591 | 67.135 | 0.00 | 0.00 |
| ATOM | 10505 | 1HG1 | VAL | 703 | 48.206 | 90.581 | 66.743 | 0.00 | 0.00 |
| ATOM | 10506 | 2HG1 | VAL | 703 | 46.944 | 89.272 | 66.956 | 0.00 | 0.00 |
| ATOM | 10507 | 3HG1 | VAL | 703 | 48.178 | 89.623 | 68.205 | 0.00 | 0.00 |
| ATOM | 10508 | CG2  | VAL | 703 | 48.608 | 87.193 | 67.408 | 0.00 | 0.00 |
| ATOM | 10509 | 1HG2 | VAL | 703 | 47.905 | 86.612 | 66.811 | 0.00 | 0.00 |
| ATOM | 10510 | 2HG2 | VAL | 703 | 49.521 | 86.639 | 67.628 | 0.00 | 0.00 |
| ATOM | 10511 | 3HG2 | VAL | 703 | 48.251 | 87.430 | 68.410 | 0.00 | 0.00 |
| ATOM | 10512 | C    | VAL | 703 | 49.973 | 87.338 | 64.732 | 0.00 | 0.00 |
| ATOM | 10513 | O    | VAL | 703 | 51.072 | 87.755 | 64.590 | 0.00 | 0.00 |
| ATOM | 10514 | N    | ALA | 704 | 49.483 | 86.080 | 64.504 | 0.00 | 0.00 |
| ATOM | 10515 | H    | ALA | 704 | 48.474 | 86.080 | 64.556 | 0.00 | 0.00 |
| ATOM | 10516 | CA   | ALA | 704 | 50.225 | 84.954 | 63.982 | 0.00 | 0.00 |
| ATOM | 10517 | HA   | ALA | 704 | 50.993 | 84.596 | 64.668 | 0.00 | 0.00 |
| ATOM | 10518 | CB   | ALA | 704 | 49.169 | 83.833 | 63.765 | 0.00 | 0.00 |
| ATOM | 10519 | HB1  | ALA | 704 | 48.633 | 83.690 | 64.703 | 0.00 | 0.00 |
| ATOM | 10520 | HB2  | ALA | 704 | 48.465 | 84.051 | 62.962 | 0.00 | 0.00 |
| ATOM | 10521 | HB3  | ALA | 704 | 49.705 | 82.916 | 63.521 | 0.00 | 0.00 |
| ATOM | 10522 | C    | ALA | 704 | 50.948 | 85.345 | 62.662 | 0.00 | 0.00 |
| ATOM | 10523 | O    | ALA | 704 | 52.134 | 85.052 | 62.475 | 0.00 | 0.00 |
| ATOM | 10524 | N    | GLU | 705 | 50.302 | 86.083 | 61.707 | 0.00 | 0.00 |
| ATOM | 10525 | H    | GLU | 705 | 49.338 | 86.314 | 61.899 | 0.00 | 0.00 |
| ATOM | 10526 | CA   | GLU | 705 | 50.978 | 86.601 | 60.477 | 0.00 | 0.00 |
| ATOM | 10527 | HA   | GLU | 705 | 51.787 | 85.926 | 60.195 | 0.00 | 0.00 |



|      |       |     |     |     |        |        |        |      |      |
|------|-------|-----|-----|-----|--------|--------|--------|------|------|
| ATOM | 10528 | CB  | GLU | 705 | 49.999 | 86.874 | 59.363 | 0.00 | 0.00 |
| ATOM | 10529 | HB2 | GLU | 705 | 49.115 | 87.384 | 59.746 | 0.00 | 0.00 |
| ATOM | 10530 | HB3 | GLU | 705 | 50.344 | 87.543 | 58.575 | 0.00 | 0.00 |
| ATOM | 10531 | CG  | GLU | 705 | 49.527 | 85.540 | 58.826 | 0.00 | 0.00 |
| ATOM | 10532 | HG2 | GLU | 705 | 50.388 | 85.075 | 58.345 | 0.00 | 0.00 |
| ATOM | 10533 | HG3 | GLU | 705 | 49.144 | 84.811 | 59.540 | 0.00 | 0.00 |
| ATOM | 10534 | CD  | GLU | 705 | 48.367 | 85.731 | 57.886 | 0.00 | 0.00 |
| ATOM | 10535 | OE1 | GLU | 705 | 47.210 | 85.974 | 58.325 | 0.00 | 0.00 |
| ATOM | 10536 | OE2 | GLU | 705 | 48.684 | 85.786 | 56.646 | 0.00 | 0.00 |
| ATOM | 10537 | C   | GLU | 705 | 51.601 | 87.935 | 60.672 | 0.00 | 0.00 |
| ATOM | 10538 | O   | GLU | 705 | 52.611 | 88.163 | 60.022 | 0.00 | 0.00 |
| ATOM | 10539 | N   | ARG | 706 | 51.137 | 88.870 | 61.516 | 0.00 | 0.00 |
| ATOM | 10540 | H   | ARG | 706 | 50.191 | 88.822 | 61.866 | 0.00 | 0.00 |
| ATOM | 10541 | CA  | ARG | 706 | 51.850 | 90.193 | 61.758 | 0.00 | 0.00 |
| ATOM | 10542 | HA  | ARG | 706 | 51.997 | 90.747 | 60.831 | 0.00 | 0.00 |
| ATOM | 10543 | CB  | ARG | 706 | 50.944 | 91.008 | 62.702 | 0.00 | 0.00 |
| ATOM | 10544 | HB2 | ARG | 706 | 50.860 | 90.374 | 63.584 | 0.00 | 0.00 |
| ATOM | 10545 | HB3 | ARG | 706 | 51.468 | 91.939 | 62.920 | 0.00 | 0.00 |
| ATOM | 10546 | CG  | ARG | 706 | 49.574 | 91.407 | 62.216 | 0.00 | 0.00 |
| ATOM | 10547 | HG2 | ARG | 706 | 49.781 | 91.979 | 61.312 | 0.00 | 0.00 |
| ATOM | 10548 | HG3 | ARG | 706 | 48.943 | 90.538 | 62.030 | 0.00 | 0.00 |
| ATOM | 10549 | CD  | ARG | 706 | 48.846 | 92.348 | 63.196 | 0.00 | 0.00 |
| ATOM | 10550 | HD2 | ARG | 706 | 48.803 | 91.943 | 64.207 | 0.00 | 0.00 |
| ATOM | 10551 | HD3 | ARG | 706 | 49.471 | 93.223 | 63.380 | 0.00 | 0.00 |
| ATOM | 10552 | NE  | ARG | 706 | 47.484 | 92.813 | 62.807 | 0.00 | 0.00 |
| ATOM | 10553 | HE  | ARG | 706 | 46.774 | 92.124 | 63.012 | 0.00 | 0.00 |

|      |       |      |     |     |        |        |        |      |      |
|------|-------|------|-----|-----|--------|--------|--------|------|------|
| ATOM | 10554 | CZ   | ARG | 706 | 47.274 | 93.853 | 62.059 | 0.00 | 0.00 |
| ATOM | 10555 | NH1  | ARG | 706 | 46.101 | 94.044 | 61.594 | 0.00 | 0.00 |
| ATOM | 10556 | 1HH1 | ARG | 706 | 45.963 | 94.938 | 61.145 | 0.00 | 0.00 |
| ATOM | 10557 | 2HH1 | ARG | 706 | 45.334 | 93.388 | 61.621 | 0.00 | 0.00 |
| ATOM | 10558 | NH2  | ARG | 706 | 48.202 | 94.766 | 61.915 | 0.00 | 0.00 |
| ATOM | 10559 | 1HH2 | ARG | 706 | 47.874 | 95.514 | 61.321 | 0.00 | 0.00 |
| ATOM | 10560 | 2HH2 | ARG | 706 | 49.156 | 94.747 | 62.245 | 0.00 | 0.00 |
| ATOM | 10561 | C    | ARG | 706 | 53.214 | 89.933 | 62.360 | 0.00 | 0.00 |
| ATOM | 10562 | O    | ARG | 706 | 54.088 | 90.691 | 61.970 | 0.00 | 0.00 |
| ATOM | 10563 | N    | LEU | 707 | 53.348 | 88.920 | 63.257 | 0.00 | 0.00 |
| ATOM | 10564 | H    | LEU | 707 | 52.491 | 88.535 | 63.627 | 0.00 | 0.00 |
| ATOM | 10565 | CA   | LEU | 707 | 54.666 | 88.496 | 63.891 | 0.00 | 0.00 |
| ATOM | 10566 | HA   | LEU | 707 | 55.379 | 89.320 | 63.885 | 0.00 | 0.00 |
| ATOM | 10567 | CB   | LEU | 707 | 54.354 | 88.058 | 65.322 | 0.00 | 0.00 |
| ATOM | 10568 | HB2  | LEU | 707 | 53.560 | 87.311 | 65.300 | 0.00 | 0.00 |
| ATOM | 10569 | HB3  | LEU | 707 | 55.296 | 87.655 | 65.694 | 0.00 | 0.00 |
| ATOM | 10570 | CG   | LEU | 707 | 53.832 | 89.155 | 66.327 | 0.00 | 0.00 |
| ATOM | 10571 | HG   | LEU | 707 | 52.937 | 89.609 | 65.903 | 0.00 | 0.00 |
| ATOM | 10572 | CD1  | LEU | 707 | 53.606 | 88.407 | 67.636 | 0.00 | 0.00 |
| ATOM | 10573 | 1HD1 | LEU | 707 | 54.589 | 88.001 | 67.874 | 0.00 | 0.00 |
| ATOM | 10574 | 2HD1 | LEU | 707 | 53.161 | 89.067 | 68.381 | 0.00 | 0.00 |
| ATOM | 10575 | 3HD1 | LEU | 707 | 52.792 | 87.710 | 67.440 | 0.00 | 0.00 |
| ATOM | 10576 | CD2  | LEU | 707 | 54.895 | 90.273 | 66.576 | 0.00 | 0.00 |
| ATOM | 10577 | 1HD2 | LEU | 707 | 54.441 | 91.080 | 67.150 | 0.00 | 0.00 |
| ATOM | 10578 | 2HD2 | LEU | 707 | 55.830 | 89.856 | 66.950 | 0.00 | 0.00 |
| ATOM | 10579 | 3HD2 | LEU | 707 | 55.117 | 90.848 | 65.677 | 0.00 | 0.00 |

|            |      |     |     |        |        |        |      |      |
|------------|------|-----|-----|--------|--------|--------|------|------|
| ATOM 10580 | C    | LEU | 707 | 55.316 | 87.352 | 62.958 | 0.00 | 0.00 |
| ATOM 10581 | O    | LEU | 707 | 56.458 | 87.037 | 63.205 | 0.00 | 0.00 |
| ATOM 10582 | N    | ASN | 708 | 54.582 | 86.872 | 61.923 | 0.00 | 0.00 |
| ATOM 10583 | H    | ASN | 708 | 53.763 | 87.352 | 61.578 | 0.00 | 0.00 |
| ATOM 10584 | CA   | ASN | 708 | 54.970 | 85.935 | 60.897 | 0.00 | 0.00 |
| ATOM 10585 | HA   | ASN | 708 | 54.031 | 85.550 | 60.499 | 0.00 | 0.00 |
| ATOM 10586 | CB   | ASN | 708 | 55.876 | 86.539 | 59.803 | 0.00 | 0.00 |
| ATOM 10587 | HB2  | ASN | 708 | 56.874 | 86.670 | 60.222 | 0.00 | 0.00 |
| ATOM 10588 | HB3  | ASN | 708 | 55.536 | 87.564 | 59.657 | 0.00 | 0.00 |
| ATOM 10589 | CG   | ASN | 708 | 56.018 | 85.778 | 58.508 | 0.00 | 0.00 |
| ATOM 10590 | OD1  | ASN | 708 | 55.436 | 84.686 | 58.382 | 0.00 | 0.00 |
| ATOM 10591 | ND2  | ASN | 708 | 56.722 | 86.288 | 57.460 | 0.00 | 0.00 |
| ATOM 10592 | 1HD2 | ASN | 708 | 56.774 | 85.811 | 56.571 | 0.00 | 0.00 |
| ATOM 10593 | 2HD2 | ASN | 708 | 57.045 | 87.244 | 57.493 | 0.00 | 0.00 |
| ATOM 10594 | C    | ASN | 708 | 55.536 | 84.609 | 61.461 | 0.00 | 0.00 |
| ATOM 10595 | O    | ASN | 708 | 56.588 | 84.047 | 61.096 | 0.00 | 0.00 |
| ATOM 10596 | N    | LEU | 709 | 54.911 | 84.188 | 62.567 | 0.00 | 0.00 |
| ATOM 10597 | H    | LEU | 709 | 54.151 | 84.767 | 62.896 | 0.00 | 0.00 |
| ATOM 10598 | CA   | LEU | 709 | 55.153 | 82.965 | 63.211 | 0.00 | 0.00 |
| ATOM 10599 | HA   | LEU | 709 | 56.223 | 82.937 | 63.414 | 0.00 | 0.00 |
| ATOM 10600 | CB   | LEU | 709 | 54.265 | 82.988 | 64.508 | 0.00 | 0.00 |
| ATOM 10601 | HB2  | LEU | 709 | 53.205 | 82.988 | 64.257 | 0.00 | 0.00 |
| ATOM 10602 | HB3  | LEU | 709 | 54.457 | 82.071 | 65.066 | 0.00 | 0.00 |
| ATOM 10603 | CG   | LEU | 709 | 54.345 | 84.216 | 65.455 | 0.00 | 0.00 |
| ATOM 10604 | HG   | LEU | 709 | 54.042 | 85.088 | 64.875 | 0.00 | 0.00 |
| ATOM 10605 | CD1  | LEU | 709 | 53.358 | 83.975 | 66.556 | 0.00 | 0.00 |

|      |       |      |     |     |        |        |        |      |      |
|------|-------|------|-----|-----|--------|--------|--------|------|------|
| ATOM | 10606 | 1HD1 | LEU | 709 | 52.347 | 83.928 | 66.152 | 0.00 | 0.00 |
| ATOM | 10607 | 2HD1 | LEU | 709 | 53.541 | 83.068 | 67.132 | 0.00 | 0.00 |
| ATOM | 10608 | 3HD1 | LEU | 709 | 53.353 | 84.815 | 67.250 | 0.00 | 0.00 |
| ATOM | 10609 | CD2  | LEU | 709 | 55.762 | 84.438 | 66.004 | 0.00 | 0.00 |
| ATOM | 10610 | 1HD2 | LEU | 709 | 56.422 | 84.627 | 65.158 | 0.00 | 0.00 |
| ATOM | 10611 | 2HD2 | LEU | 709 | 55.718 | 85.320 | 66.642 | 0.00 | 0.00 |
| ATOM | 10612 | 3HD2 | LEU | 709 | 56.034 | 83.591 | 66.634 | 0.00 | 0.00 |
| ATOM | 10613 | C    | LEU | 709 | 54.848 | 81.712 | 62.269 | 0.00 | 0.00 |
| ATOM | 10614 | O    | LEU | 709 | 53.987 | 81.795 | 61.374 | 0.00 | 0.00 |
| ATOM | 10615 | N    | ARG | 710 | 55.418 | 80.511 | 62.632 | 0.00 | 0.00 |
| ATOM | 10616 | H    | ARG | 710 | 56.104 | 80.539 | 63.373 | 0.00 | 0.00 |
| ATOM | 10617 | CA   | ARG | 710 | 55.442 | 79.331 | 61.667 | 0.00 | 0.00 |
| ATOM | 10618 | HA   | ARG | 710 | 55.018 | 79.702 | 60.734 | 0.00 | 0.00 |
| ATOM | 10619 | CB   | ARG | 710 | 56.933 | 79.170 | 61.282 | 0.00 | 0.00 |
| ATOM | 10620 | HB2  | ARG | 710 | 57.176 | 80.126 | 60.817 | 0.00 | 0.00 |
| ATOM | 10621 | HB3  | ARG | 710 | 57.498 | 79.005 | 62.199 | 0.00 | 0.00 |
| ATOM | 10622 | CG   | ARG | 710 | 56.957 | 78.052 | 60.287 | 0.00 | 0.00 |
| ATOM | 10623 | HG2  | ARG | 710 | 56.774 | 77.072 | 60.728 | 0.00 | 0.00 |
| ATOM | 10624 | HG3  | ARG | 710 | 56.328 | 78.214 | 59.412 | 0.00 | 0.00 |
| ATOM | 10625 | CD   | ARG | 710 | 58.361 | 78.092 | 59.677 | 0.00 | 0.00 |
| ATOM | 10626 | HD2  | ARG | 710 | 58.652 | 79.069 | 59.289 | 0.00 | 0.00 |
| ATOM | 10627 | HD3  | ARG | 710 | 59.172 | 78.077 | 60.404 | 0.00 | 0.00 |
| ATOM | 10628 | NE   | ARG | 710 | 58.447 | 76.946 | 58.775 | 0.00 | 0.00 |
| ATOM | 10629 | HE   | ARG | 710 | 57.955 | 76.139 | 59.132 | 0.00 | 0.00 |
| ATOM | 10630 | CZ   | ARG | 710 | 59.027 | 76.747 | 57.641 | 0.00 | 0.00 |
| ATOM | 10631 | NH1  | ARG | 710 | 59.494 | 77.715 | 57.015 | 0.00 | 0.00 |

|      |       |      |     |     |        |        |        |      |      |
|------|-------|------|-----|-----|--------|--------|--------|------|------|
| ATOM | 10632 | 1HH1 | ARG | 710 | 59.960 | 77.633 | 56.123 | 0.00 | 0.00 |
| ATOM | 10633 | 2HH1 | ARG | 710 | 59.367 | 78.612 | 57.462 | 0.00 | 0.00 |
| ATOM | 10634 | NH2  | ARG | 710 | 59.055 | 75.589 | 57.086 | 0.00 | 0.00 |
| ATOM | 10635 | 1HH2 | ARG | 710 | 59.321 | 75.454 | 56.121 | 0.00 | 0.00 |
| ATOM | 10636 | 2HH2 | ARG | 710 | 58.474 | 74.852 | 57.459 | 0.00 | 0.00 |
| ATOM | 10637 | C    | ARG | 710 | 54.699 | 78.141 | 62.167 | 0.00 | 0.00 |
| ATOM | 10638 | O    | ARG | 710 | 54.304 | 77.325 | 61.346 | 0.00 | 0.00 |
| ATOM | 10639 | N    | SER | 711 | 54.373 | 78.067 | 63.471 | 0.00 | 0.00 |
| ATOM | 10640 | H    | SER | 711 | 54.758 | 78.739 | 64.119 | 0.00 | 0.00 |
| ATOM | 10641 | CA   | SER | 711 | 53.498 | 76.943 | 63.884 | 0.00 | 0.00 |
| ATOM | 10642 | HA   | SER | 711 | 53.842 | 76.092 | 63.298 | 0.00 | 0.00 |
| ATOM | 10643 | CB   | SER | 711 | 53.537 | 76.625 | 65.406 | 0.00 | 0.00 |
| ATOM | 10644 | HB2  | SER | 711 | 52.975 | 77.356 | 65.987 | 0.00 | 0.00 |
| ATOM | 10645 | HB3  | SER | 711 | 53.116 | 75.624 | 65.493 | 0.00 | 0.00 |
| ATOM | 10646 | OG   | SER | 711 | 54.875 | 76.597 | 65.749 | 0.00 | 0.00 |
| ATOM | 10647 | HG   | SER | 711 | 55.145 | 77.517 | 65.697 | 0.00 | 0.00 |
| ATOM | 10648 | C    | SER | 711 | 51.993 | 77.219 | 63.461 | 0.00 | 0.00 |
| ATOM | 10649 | O    | SER | 711 | 51.586 | 78.369 | 63.328 | 0.00 | 0.00 |
| ATOM | 10650 | N    | ALA | 712 | 51.258 | 76.153 | 63.269 | 0.00 | 0.00 |
| ATOM | 10651 | H    | ALA | 712 | 51.581 | 75.241 | 63.560 | 0.00 | 0.00 |
| ATOM | 10652 | CA   | ALA | 712 | 49.819 | 76.284 | 63.009 | 0.00 | 0.00 |
| ATOM | 10653 | HA   | ALA | 712 | 49.681 | 77.111 | 62.312 | 0.00 | 0.00 |
| ATOM | 10654 | CB   | ALA | 712 | 49.156 | 75.086 | 62.327 | 0.00 | 0.00 |
| ATOM | 10655 | HB1  | ALA | 712 | 49.515 | 74.965 | 61.305 | 0.00 | 0.00 |
| ATOM | 10656 | HB2  | ALA | 712 | 49.316 | 74.163 | 62.884 | 0.00 | 0.00 |
| ATOM | 10657 | HB3  | ALA | 712 | 48.085 | 75.279 | 62.263 | 0.00 | 0.00 |

|      |       |      |     |     |        |        |        |      |      |
|------|-------|------|-----|-----|--------|--------|--------|------|------|
| ATOM | 10658 | C    | ALA | 712 | 49.098 | 76.637 | 64.300 | 0.00 | 0.00 |
| ATOM | 10659 | O    | ALA | 712 | 49.349 | 75.973 | 65.340 | 0.00 | 0.00 |
| ATOM | 10660 | N    | ILE | 713 | 48.308 | 77.654 | 64.281 | 0.00 | 0.00 |
| ATOM | 10661 | H    | ILE | 713 | 48.232 | 78.088 | 63.372 | 0.00 | 0.00 |
| ATOM | 10662 | CA   | ILE | 713 | 47.505 | 78.076 | 65.478 | 0.00 | 0.00 |
| ATOM | 10663 | HA   | ILE | 713 | 48.071 | 77.813 | 66.372 | 0.00 | 0.00 |
| ATOM | 10664 | CB   | ILE | 713 | 47.277 | 79.567 | 65.520 | 0.00 | 0.00 |
| ATOM | 10665 | HB   | ILE | 713 | 47.131 | 79.841 | 66.565 | 0.00 | 0.00 |
| ATOM | 10666 | CG2  | ILE | 713 | 48.522 | 80.380 | 64.993 | 0.00 | 0.00 |
| ATOM | 10667 | 1HG2 | ILE | 713 | 48.429 | 80.512 | 63.915 | 0.00 | 0.00 |
| ATOM | 10668 | 2HG2 | ILE | 713 | 48.385 | 81.363 | 65.444 | 0.00 | 0.00 |
| ATOM | 10669 | 3HG2 | ILE | 713 | 49.491 | 79.963 | 65.269 | 0.00 | 0.00 |
| ATOM | 10670 | CG1  | ILE | 713 | 45.971 | 79.949 | 64.695 | 0.00 | 0.00 |
| ATOM | 10671 | 2HG1 | ILE | 713 | 46.153 | 79.762 | 63.636 | 0.00 | 0.00 |
| ATOM | 10672 | 3HG1 | ILE | 713 | 45.111 | 79.385 | 65.057 | 0.00 | 0.00 |
| ATOM | 10673 | CD1  | ILE | 713 | 45.534 | 81.398 | 64.765 | 0.00 | 0.00 |
| ATOM | 10674 | 1HD1 | ILE | 713 | 44.683 | 81.534 | 64.098 | 0.00 | 0.00 |
| ATOM | 10675 | 2HD1 | ILE | 713 | 45.189 | 81.714 | 65.750 | 0.00 | 0.00 |
| ATOM | 10676 | 3HD1 | ILE | 713 | 46.329 | 82.073 | 64.448 | 0.00 | 0.00 |
| ATOM | 10677 | C    | ILE | 713 | 46.219 | 77.139 | 65.704 | 0.00 | 0.00 |
| ATOM | 10678 | O    | ILE | 713 | 45.698 | 76.322 | 64.944 | 0.00 | 0.00 |
| ATOM | 10679 | N    | ALA | 714 | 45.683 | 77.309 | 66.907 | 0.00 | 0.00 |
| ATOM | 10680 | H    | ALA | 714 | 46.223 | 77.936 | 67.487 | 0.00 | 0.00 |
| ATOM | 10681 | CA   | ALA | 714 | 44.416 | 76.890 | 67.506 | 0.00 | 0.00 |
| ATOM | 10682 | HA   | ALA | 714 | 43.648 | 76.741 | 66.746 | 0.00 | 0.00 |
| ATOM | 10683 | CB   | ALA | 714 | 44.627 | 75.674 | 68.409 | 0.00 | 0.00 |

|      |       |      |     |     |        |        |        |      |      |
|------|-------|------|-----|-----|--------|--------|--------|------|------|
| ATOM | 10684 | HB1  | ALA | 714 | 45.521 | 75.836 | 69.012 | 0.00 | 0.00 |
| ATOM | 10685 | HB2  | ALA | 714 | 43.753 | 75.502 | 69.036 | 0.00 | 0.00 |
| ATOM | 10686 | HB3  | ALA | 714 | 44.699 | 74.736 | 67.858 | 0.00 | 0.00 |
| ATOM | 10687 | C    | ALA | 714 | 43.950 | 78.078 | 68.272 | 0.00 | 0.00 |
| ATOM | 10688 | O    | ALA | 714 | 44.737 | 78.968 | 68.639 | 0.00 | 0.00 |
| ATOM | 10689 | N    | VAL | 715 | 42.659 | 78.189 | 68.535 | 0.00 | 0.00 |
| ATOM | 10690 | H    | VAL | 715 | 42.086 | 77.368 | 68.404 | 0.00 | 0.00 |
| ATOM | 10691 | CA   | VAL | 715 | 42.026 | 79.365 | 69.099 | 0.00 | 0.00 |
| ATOM | 10692 | HA   | VAL | 715 | 42.726 | 80.055 | 69.570 | 0.00 | 0.00 |
| ATOM | 10693 | CB   | VAL | 715 | 41.194 | 80.113 | 68.068 | 0.00 | 0.00 |
| ATOM | 10694 | HB   | VAL | 715 | 40.278 | 79.573 | 67.827 | 0.00 | 0.00 |
| ATOM | 10695 | CG1  | VAL | 715 | 40.641 | 81.465 | 68.498 | 0.00 | 0.00 |
| ATOM | 10696 | 1HG1 | VAL | 715 | 41.439 | 82.205 | 68.448 | 0.00 | 0.00 |
| ATOM | 10697 | 2HG1 | VAL | 715 | 39.809 | 81.658 | 67.821 | 0.00 | 0.00 |
| ATOM | 10698 | 3HG1 | VAL | 715 | 40.331 | 81.347 | 69.536 | 0.00 | 0.00 |
| ATOM | 10699 | CG2  | VAL | 715 | 42.016 | 80.214 | 66.795 | 0.00 | 0.00 |
| ATOM | 10700 | 1HG2 | VAL | 715 | 43.068 | 80.442 | 66.969 | 0.00 | 0.00 |
| ATOM | 10701 | 2HG2 | VAL | 715 | 42.035 | 79.336 | 66.149 | 0.00 | 0.00 |
| ATOM | 10702 | 3HG2 | VAL | 715 | 41.600 | 81.064 | 66.255 | 0.00 | 0.00 |
| ATOM | 10703 | C    | VAL | 715 | 41.156 | 78.825 | 70.297 | 0.00 | 0.00 |
| ATOM | 10704 | O    | VAL | 715 | 40.664 | 77.738 | 70.198 | 0.00 | 0.00 |
| ATOM | 10705 | N    | VAL | 716 | 40.995 | 79.534 | 71.347 | 0.00 | 0.00 |
| ATOM | 10706 | H    | VAL | 716 | 41.366 | 80.473 | 71.363 | 0.00 | 0.00 |
| ATOM | 10707 | CA   | VAL | 716 | 40.253 | 79.058 | 72.573 | 0.00 | 0.00 |
| ATOM | 10708 | HA   | VAL | 716 | 40.468 | 77.991 | 72.636 | 0.00 | 0.00 |
| ATOM | 10709 | CB   | VAL | 716 | 40.905 | 79.640 | 73.868 | 0.00 | 0.00 |

|      |       |      |     |     |        |        |        |      |      |
|------|-------|------|-----|-----|--------|--------|--------|------|------|
| ATOM | 10710 | HB   | VAL | 716 | 40.311 | 79.153 | 74.642 | 0.00 | 0.00 |
| ATOM | 10711 | CG1  | VAL | 716 | 42.390 | 79.189 | 74.099 | 0.00 | 0.00 |
| ATOM | 10712 | 1HG1 | VAL | 716 | 42.161 | 78.137 | 74.271 | 0.00 | 0.00 |
| ATOM | 10713 | 2HG1 | VAL | 716 | 43.030 | 79.207 | 73.216 | 0.00 | 0.00 |
| ATOM | 10714 | 3HG1 | VAL | 716 | 42.768 | 79.701 | 74.983 | 0.00 | 0.00 |
| ATOM | 10715 | CG2  | VAL | 716 | 40.808 | 81.133 | 73.842 | 0.00 | 0.00 |
| ATOM | 10716 | 1HG2 | VAL | 716 | 39.778 | 81.443 | 74.022 | 0.00 | 0.00 |
| ATOM | 10717 | 2HG2 | VAL | 716 | 41.491 | 81.528 | 74.594 | 0.00 | 0.00 |
| ATOM | 10718 | 3HG2 | VAL | 716 | 41.248 | 81.498 | 72.914 | 0.00 | 0.00 |
| ATOM | 10719 | C    | VAL | 716 | 38.806 | 79.254 | 72.581 | 0.00 | 0.00 |
| ATOM | 10720 | O    | VAL | 716 | 38.313 | 80.182 | 71.930 | 0.00 | 0.00 |
| ATOM | 10721 | N    | LYS | 717 | 38.101 | 78.336 | 73.306 | 0.00 | 0.00 |
| ATOM | 10722 | H    | LYS | 717 | 38.535 | 77.516 | 73.705 | 0.00 | 0.00 |
| ATOM | 10723 | CA   | LYS | 717 | 36.619 | 78.447 | 73.505 | 0.00 | 0.00 |
| ATOM | 10724 | HA   | LYS | 717 | 36.539 | 79.526 | 73.644 | 0.00 | 0.00 |
| ATOM | 10725 | CB   | LYS | 717 | 35.823 | 77.858 | 72.343 | 0.00 | 0.00 |
| ATOM | 10726 | HB2  | LYS | 717 | 34.764 | 78.019 | 72.543 | 0.00 | 0.00 |
| ATOM | 10727 | HB3  | LYS | 717 | 36.027 | 78.329 | 71.381 | 0.00 | 0.00 |
| ATOM | 10728 | CG   | LYS | 717 | 36.185 | 76.347 | 72.167 | 0.00 | 0.00 |
| ATOM | 10729 | HG2  | LYS | 717 | 37.238 | 76.246 | 71.903 | 0.00 | 0.00 |
| ATOM | 10730 | HG3  | LYS | 717 | 35.917 | 75.866 | 73.108 | 0.00 | 0.00 |
| ATOM | 10731 | CD   | LYS | 717 | 35.444 | 75.725 | 71.039 | 0.00 | 0.00 |
| ATOM | 10732 | HD2  | LYS | 717 | 34.419 | 75.586 | 71.382 | 0.00 | 0.00 |
| ATOM | 10733 | HD3  | LYS | 717 | 35.428 | 76.521 | 70.294 | 0.00 | 0.00 |
| ATOM | 10734 | CE   | LYS | 717 | 36.143 | 74.467 | 70.559 | 0.00 | 0.00 |
| ATOM | 10735 | HE2  | LYS | 717 | 37.061 | 74.641 | 69.998 | 0.00 | 0.00 |



|      |       |     |     |     |        |        |        |      |      |
|------|-------|-----|-----|-----|--------|--------|--------|------|------|
| ATOM | 10736 | HE3 | LYS | 717 | 36.486 | 73.943 | 71.451 | 0.00 | 0.00 |
| ATOM | 10737 | NZ  | LYS | 717 | 35.361 | 73.562 | 69.755 | 0.00 | 0.00 |
| ATOM | 10738 | HZ1 | LYS | 717 | 34.500 | 73.426 | 70.265 | 0.00 | 0.00 |
| ATOM | 10739 | HZ2 | LYS | 717 | 35.085 | 74.068 | 68.926 | 0.00 | 0.00 |
| ATOM | 10740 | HZ3 | LYS | 717 | 35.693 | 72.609 | 69.745 | 0.00 | 0.00 |
| ATOM | 10741 | C   | LYS | 717 | 36.226 | 77.874 | 74.877 | 0.00 | 0.00 |
| ATOM | 10742 | O   | LYS | 717 | 36.948 | 76.962 | 75.436 | 0.00 | 0.00 |
| ATOM | 10743 | N   | GLY | 718 | 35.094 | 78.295 | 75.407 | 0.00 | 0.00 |
| ATOM | 10744 | H   | GLY | 718 | 34.547 | 78.973 | 74.896 | 0.00 | 0.00 |
| ATOM | 10745 | CA  | GLY | 718 | 34.407 | 77.744 | 76.602 | 0.00 | 0.00 |
| ATOM | 10746 | HA2 | GLY | 718 | 33.377 | 78.101 | 76.594 | 0.00 | 0.00 |
| ATOM | 10747 | HA3 | GLY | 718 | 34.198 | 76.677 | 76.527 | 0.00 | 0.00 |
| ATOM | 10748 | C   | GLY | 718 | 34.888 | 78.205 | 78.002 | 0.00 | 0.00 |
| ATOM | 10749 | O   | GLY | 718 | 34.635 | 77.539 | 78.990 | 0.00 | 0.00 |
| ATOM | 10750 | N   | CYS | 719 | 35.677 | 79.280 | 78.032 | 0.00 | 0.00 |
| ATOM | 10751 | H   | CYS | 719 | 35.903 | 79.783 | 77.186 | 0.00 | 0.00 |
| ATOM | 10752 | CA  | CYS | 719 | 36.285 | 79.722 | 79.271 | 0.00 | 0.00 |
| ATOM | 10753 | HA  | CYS | 719 | 36.699 | 78.872 | 79.813 | 0.00 | 0.00 |
| ATOM | 10754 | CB  | CYS | 719 | 37.502 | 80.539 | 78.930 | 0.00 | 0.00 |
| ATOM | 10755 | HB2 | CYS | 719 | 37.131 | 81.414 | 78.396 | 0.00 | 0.00 |
| ATOM | 10756 | HB3 | CYS | 719 | 37.872 | 80.859 | 79.904 | 0.00 | 0.00 |
| ATOM | 10757 | SG  | CYS | 719 | 38.726 | 79.582 | 78.095 | 0.00 | 0.00 |
| ATOM | 10758 | HG  | CYS | 719 | 38.235 | 79.272 | 76.892 | 0.00 | 0.00 |
| ATOM | 10759 | C   | CYS | 719 | 35.232 | 80.412 | 80.232 | 0.00 | 0.00 |
| ATOM | 10760 | O   | CYS | 719 | 35.588 | 80.350 | 81.450 | 0.00 | 0.00 |
| ATOM | 10761 | N   | ARG | 720 | 34.138 | 81.001 | 79.772 | 0.00 | 0.00 |

|      |       |      |     |     |        |        |        |      |      |
|------|-------|------|-----|-----|--------|--------|--------|------|------|
| ATOM | 10762 | H    | ARG | 720 | 33.881 | 80.871 | 78.804 | 0.00 | 0.00 |
| ATOM | 10763 | CA   | ARG | 720 | 33.104 | 81.423 | 80.788 | 0.00 | 0.00 |
| ATOM | 10764 | HA   | ARG | 720 | 33.486 | 81.622 | 81.789 | 0.00 | 0.00 |
| ATOM | 10765 | CB   | ARG | 720 | 32.556 | 82.794 | 80.214 | 0.00 | 0.00 |
| ATOM | 10766 | HB2  | ARG | 720 | 32.032 | 82.552 | 79.289 | 0.00 | 0.00 |
| ATOM | 10767 | HB3  | ARG | 720 | 31.774 | 83.271 | 80.804 | 0.00 | 0.00 |
| ATOM | 10768 | CG   | ARG | 720 | 33.543 | 83.909 | 80.008 | 0.00 | 0.00 |
| ATOM | 10769 | HG2  | ARG | 720 | 34.328 | 83.540 | 79.348 | 0.00 | 0.00 |
| ATOM | 10770 | HG3  | ARG | 720 | 32.989 | 84.661 | 79.446 | 0.00 | 0.00 |
| ATOM | 10771 | CD   | ARG | 720 | 34.221 | 84.549 | 81.268 | 0.00 | 0.00 |
| ATOM | 10772 | HD2  | ARG | 720 | 34.661 | 85.527 | 81.071 | 0.00 | 0.00 |
| ATOM | 10773 | HD3  | ARG | 720 | 33.450 | 84.678 | 82.028 | 0.00 | 0.00 |
| ATOM | 10774 | NE   | ARG | 720 | 35.308 | 83.732 | 81.763 | 0.00 | 0.00 |
| ATOM | 10775 | HE   | ARG | 720 | 35.972 | 83.333 | 81.115 | 0.00 | 0.00 |
| ATOM | 10776 | CZ   | ARG | 720 | 35.811 | 83.675 | 82.958 | 0.00 | 0.00 |
| ATOM | 10777 | NH1  | ARG | 720 | 35.471 | 84.411 | 83.942 | 0.00 | 0.00 |
| ATOM | 10778 | 1HH1 | ARG | 720 | 35.727 | 84.178 | 84.891 | 0.00 | 0.00 |
| ATOM | 10779 | 2HH1 | ARG | 720 | 34.670 | 85.022 | 83.864 | 0.00 | 0.00 |
| ATOM | 10780 | NH2  | ARG | 720 | 36.819 | 82.889 | 83.109 | 0.00 | 0.00 |
| ATOM | 10781 | 1HH2 | ARG | 720 | 37.191 | 82.918 | 84.048 | 0.00 | 0.00 |
| ATOM | 10782 | 2HH2 | ARG | 720 | 37.170 | 82.271 | 82.392 | 0.00 | 0.00 |
| ATOM | 10783 | C    | ARG | 720 | 32.007 | 80.393 | 80.914 | 0.00 | 0.00 |
| ATOM | 10784 | O    | ARG | 720 | 31.201 | 80.590 | 81.782 | 0.00 | 0.00 |
| ATOM | 10785 | N    | THR | 721 | 31.949 | 79.318 | 80.093 | 0.00 | 0.00 |
| ATOM | 10786 | H    | THR | 721 | 32.479 | 79.282 | 79.234 | 0.00 | 0.00 |
| ATOM | 10787 | CA   | THR | 721 | 30.911 | 78.340 | 80.183 | 0.00 | 0.00 |

|      |       |      |     |     |        |        |        |      |      |
|------|-------|------|-----|-----|--------|--------|--------|------|------|
| ATOM | 10788 | HA   | THR | 721 | 30.037 | 78.771 | 80.672 | 0.00 | 0.00 |
| ATOM | 10789 | CB   | THR | 721 | 30.501 | 77.813 | 78.768 | 0.00 | 0.00 |
| ATOM | 10790 | HB   | THR | 721 | 29.832 | 76.954 | 78.802 | 0.00 | 0.00 |
| ATOM | 10791 | CG2  | THR | 721 | 29.809 | 79.066 | 78.041 | 0.00 | 0.00 |
| ATOM | 10792 | 1HG2 | THR | 721 | 29.155 | 78.680 | 77.260 | 0.00 | 0.00 |
| ATOM | 10793 | 2HG2 | THR | 721 | 29.353 | 79.707 | 78.796 | 0.00 | 0.00 |
| ATOM | 10794 | 3HG2 | THR | 721 | 30.594 | 79.672 | 77.588 | 0.00 | 0.00 |
| ATOM | 10795 | OG1  | THR | 721 | 31.617 | 77.381 | 78.017 | 0.00 | 0.00 |
| ATOM | 10796 | HG1  | THR | 721 | 31.295 | 77.074 | 77.166 | 0.00 | 0.00 |
| ATOM | 10797 | C    | THR | 721 | 31.324 | 77.167 | 81.045 | 0.00 | 0.00 |
| ATOM | 10798 | O    | THR | 721 | 30.472 | 76.587 | 81.676 | 0.00 | 0.00 |
| ATOM | 10799 | N    | VAL | 722 | 32.626 | 76.871 | 81.188 | 0.00 | 0.00 |
| ATOM | 10800 | H    | VAL | 722 | 33.266 | 77.396 | 80.609 | 0.00 | 0.00 |
| ATOM | 10801 | CA   | VAL | 722 | 33.181 | 75.869 | 82.069 | 0.00 | 0.00 |
| ATOM | 10802 | HA   | VAL | 722 | 32.807 | 74.883 | 81.795 | 0.00 | 0.00 |
| ATOM | 10803 | CB   | VAL | 722 | 34.716 | 75.798 | 81.931 | 0.00 | 0.00 |
| ATOM | 10804 | HB   | VAL | 722 | 34.883 | 75.685 | 80.860 | 0.00 | 0.00 |
| ATOM | 10805 | CG1  | VAL | 722 | 35.524 | 77.038 | 82.355 | 0.00 | 0.00 |
| ATOM | 10806 | 1HG1 | VAL | 722 | 36.561 | 76.974 | 82.026 | 0.00 | 0.00 |
| ATOM | 10807 | 2HG1 | VAL | 722 | 35.023 | 77.928 | 81.973 | 0.00 | 0.00 |
| ATOM | 10808 | 3HG1 | VAL | 722 | 35.632 | 77.183 | 83.430 | 0.00 | 0.00 |
| ATOM | 10809 | CG2  | VAL | 722 | 35.363 | 74.574 | 82.691 | 0.00 | 0.00 |
| ATOM | 10810 | 1HG2 | VAL | 722 | 36.444 | 74.477 | 82.586 | 0.00 | 0.00 |
| ATOM | 10811 | 2HG2 | VAL | 722 | 35.108 | 74.615 | 83.750 | 0.00 | 0.00 |
| ATOM | 10812 | 3HG2 | VAL | 722 | 34.812 | 73.689 | 82.372 | 0.00 | 0.00 |
| ATOM | 10813 | C    | VAL | 722 | 32.709 | 76.066 | 83.457 | 0.00 | 0.00 |

|      |       |      |     |     |        |        |        |      |      |
|------|-------|------|-----|-----|--------|--------|--------|------|------|
| ATOM | 10814 | O    | VAL | 722 | 32.689 | 77.184 | 83.930 | 0.00 | 0.00 |
| ATOM | 10815 | N    | GLN | 723 | 32.406 | 74.956 | 84.208 | 0.00 | 0.00 |
| ATOM | 10816 | H    | GLN | 723 | 32.581 | 74.059 | 83.778 | 0.00 | 0.00 |
| ATOM | 10817 | CA   | GLN | 723 | 31.970 | 74.978 | 85.566 | 0.00 | 0.00 |
| ATOM | 10818 | HA   | GLN | 723 | 32.494 | 75.693 | 86.200 | 0.00 | 0.00 |
| ATOM | 10819 | CB   | GLN | 723 | 30.474 | 75.305 | 85.636 | 0.00 | 0.00 |
| ATOM | 10820 | HB2  | GLN | 723 | 30.049 | 75.285 | 86.640 | 0.00 | 0.00 |
| ATOM | 10821 | HB3  | GLN | 723 | 30.424 | 76.338 | 85.291 | 0.00 | 0.00 |
| ATOM | 10822 | CG   | GLN | 723 | 29.619 | 74.253 | 84.859 | 0.00 | 0.00 |
| ATOM | 10823 | HG2  | GLN | 723 | 29.940 | 74.192 | 83.820 | 0.00 | 0.00 |
| ATOM | 10824 | HG3  | GLN | 723 | 29.623 | 73.325 | 85.431 | 0.00 | 0.00 |
| ATOM | 10825 | CD   | GLN | 723 | 28.104 | 74.489 | 84.932 | 0.00 | 0.00 |
| ATOM | 10826 | OE1  | GLN | 723 | 27.667 | 75.496 | 85.510 | 0.00 | 0.00 |
| ATOM | 10827 | NE2  | GLN | 723 | 27.345 | 73.712 | 84.234 | 0.00 | 0.00 |
| ATOM | 10828 | 1HE2 | GLN | 723 | 26.399 | 74.063 | 84.178 | 0.00 | 0.00 |
| ATOM | 10829 | 2HE2 | GLN | 723 | 27.680 | 72.950 | 83.662 | 0.00 | 0.00 |
| ATOM | 10830 | C    | GLN | 723 | 32.252 | 73.702 | 86.245 | 0.00 | 0.00 |
| ATOM | 10831 | O    | GLN | 723 | 32.428 | 72.635 | 85.625 | 0.00 | 0.00 |
| ATOM | 10832 | N    | LYS | 724 | 32.132 | 73.609 | 87.558 | 0.00 | 0.00 |
| ATOM | 10833 | H    | LYS | 724 | 31.756 | 74.423 | 88.023 | 0.00 | 0.00 |
| ATOM | 10834 | CA   | LYS | 724 | 32.808 | 72.510 | 88.342 | 0.00 | 0.00 |
| ATOM | 10835 | HA   | LYS | 724 | 33.841 | 72.410 | 88.009 | 0.00 | 0.00 |
| ATOM | 10836 | CB   | LYS | 724 | 32.817 | 73.016 | 89.826 | 0.00 | 0.00 |
| ATOM | 10837 | HB2  | LYS | 724 | 33.097 | 74.066 | 89.910 | 0.00 | 0.00 |
| ATOM | 10838 | HB3  | LYS | 724 | 31.850 | 72.841 | 90.299 | 0.00 | 0.00 |
| ATOM | 10839 | CG   | LYS | 724 | 34.023 | 72.214 | 90.527 | 0.00 | 0.00 |

|      |       |     |     |     |        |        |        |      |      |
|------|-------|-----|-----|-----|--------|--------|--------|------|------|
| ATOM | 10840 | HG2 | LYS | 724 | 33.892 | 71.141 | 90.384 | 0.00 | 0.00 |
| ATOM | 10841 | HG3 | LYS | 724 | 34.983 | 72.442 | 90.063 | 0.00 | 0.00 |
| ATOM | 10842 | CD  | LYS | 724 | 34.146 | 72.492 | 92.031 | 0.00 | 0.00 |
| ATOM | 10843 | HD2 | LYS | 724 | 33.926 | 73.530 | 92.279 | 0.00 | 0.00 |
| ATOM | 10844 | HD3 | LYS | 724 | 33.365 | 71.887 | 92.492 | 0.00 | 0.00 |
| ATOM | 10845 | CE  | LYS | 724 | 35.366 | 72.008 | 92.767 | 0.00 | 0.00 |
| ATOM | 10846 | HE2 | LYS | 724 | 35.694 | 71.029 | 92.420 | 0.00 | 0.00 |
| ATOM | 10847 | HE3 | LYS | 724 | 36.255 | 72.613 | 92.590 | 0.00 | 0.00 |
| ATOM | 10848 | NZ  | LYS | 724 | 35.318 | 72.021 | 94.296 | 0.00 | 0.00 |
| ATOM | 10849 | HZ1 | LYS | 724 | 34.875 | 72.868 | 94.622 | 0.00 | 0.00 |
| ATOM | 10850 | HZ2 | LYS | 724 | 34.680 | 71.289 | 94.573 | 0.00 | 0.00 |
| ATOM | 10851 | HZ3 | LYS | 724 | 36.184 | 71.730 | 94.728 | 0.00 | 0.00 |
| ATOM | 10852 | C   | LYS | 724 | 32.336 | 71.081 | 88.182 | 0.00 | 0.00 |
| ATOM | 10853 | O   | LYS | 724 | 33.144 | 70.135 | 88.173 | 0.00 | 0.00 |
| ATOM | 10854 | N   | ALA | 725 | 31.027 | 70.862 | 87.991 | 0.00 | 0.00 |
| ATOM | 10855 | H   | ALA | 725 | 30.380 | 71.628 | 87.866 | 0.00 | 0.00 |
| ATOM | 10856 | CA  | ALA | 725 | 30.501 | 69.589 | 87.514 | 0.00 | 0.00 |
| ATOM | 10857 | HA  | ALA | 725 | 30.631 | 68.746 | 88.193 | 0.00 | 0.00 |
| ATOM | 10858 | CB  | ALA | 725 | 28.950 | 69.685 | 87.357 | 0.00 | 0.00 |
| ATOM | 10859 | HB1 | ALA | 725 | 28.763 | 70.220 | 86.426 | 0.00 | 0.00 |
| ATOM | 10860 | HB2 | ALA | 725 | 28.583 | 68.669 | 87.215 | 0.00 | 0.00 |
| ATOM | 10861 | HB3 | ALA | 725 | 28.591 | 70.197 | 88.250 | 0.00 | 0.00 |
| ATOM | 10862 | C   | ALA | 725 | 31.116 | 69.144 | 86.143 | 0.00 | 0.00 |
| ATOM | 10863 | O   | ALA | 725 | 30.870 | 67.982 | 85.807 | 0.00 | 0.00 |
| ATOM | 10864 | N   | ASP | 726 | 31.959 | 69.898 | 85.434 | 0.00 | 0.00 |
| ATOM | 10865 | H   | ASP | 726 | 32.040 | 70.863 | 85.722 | 0.00 | 0.00 |

|      |       |     |     |     |        |        |        |      |      |
|------|-------|-----|-----|-----|--------|--------|--------|------|------|
| ATOM | 10866 | CA  | ASP | 726 | 32.523 | 69.565 | 84.107 | 0.00 | 0.00 |
| ATOM | 10867 | HA  | ASP | 726 | 31.954 | 68.706 | 83.751 | 0.00 | 0.00 |
| ATOM | 10868 | CB  | ASP | 726 | 32.262 | 70.692 | 83.056 | 0.00 | 0.00 |
| ATOM | 10869 | HB2 | ASP | 726 | 31.351 | 71.184 | 83.396 | 0.00 | 0.00 |
| ATOM | 10870 | HB3 | ASP | 726 | 33.074 | 71.418 | 82.999 | 0.00 | 0.00 |
| ATOM | 10871 | CG  | ASP | 726 | 32.004 | 70.072 | 81.658 | 0.00 | 0.00 |
| ATOM | 10872 | OD1 | ASP | 726 | 32.597 | 70.463 | 80.627 | 0.00 | 0.00 |
| ATOM | 10873 | OD2 | ASP | 726 | 30.997 | 69.304 | 81.512 | 0.00 | 0.00 |
| ATOM | 10874 | C   | ASP | 726 | 34.042 | 69.126 | 84.142 | 0.00 | 0.00 |
| ATOM | 10875 | O   | ASP | 726 | 34.715 | 69.065 | 83.130 | 0.00 | 0.00 |
| ATOM | 10876 | N   | MET | 727 | 34.564 | 68.888 | 85.336 | 0.00 | 0.00 |
| ATOM | 10877 | H   | MET | 727 | 33.955 | 68.944 | 86.140 | 0.00 | 0.00 |
| ATOM | 10878 | CA  | MET | 727 | 35.903 | 68.414 | 85.495 | 0.00 | 0.00 |
| ATOM | 10879 | HA  | MET | 727 | 36.547 | 68.734 | 84.676 | 0.00 | 0.00 |
| ATOM | 10880 | CB  | MET | 727 | 36.602 | 68.958 | 86.728 | 0.00 | 0.00 |
| ATOM | 10881 | HB2 | MET | 727 | 36.083 | 68.793 | 87.672 | 0.00 | 0.00 |
| ATOM | 10882 | HB3 | MET | 727 | 37.618 | 68.587 | 86.865 | 0.00 | 0.00 |
| ATOM | 10883 | CG  | MET | 727 | 36.867 | 70.480 | 86.547 | 0.00 | 0.00 |
| ATOM | 10884 | HG2 | MET | 727 | 35.912 | 70.768 | 86.109 | 0.00 | 0.00 |
| ATOM | 10885 | HG3 | MET | 727 | 37.038 | 70.905 | 87.536 | 0.00 | 0.00 |
| ATOM | 10886 | SD  | MET | 727 | 38.132 | 70.983 | 85.399 | 0.00 | 0.00 |
| ATOM | 10887 | CE  | MET | 727 | 37.248 | 72.254 | 84.426 | 0.00 | 0.00 |
| ATOM | 10888 | HE1 | MET | 727 | 36.386 | 71.886 | 83.871 | 0.00 | 0.00 |
| ATOM | 10889 | HE2 | MET | 727 | 36.940 | 73.048 | 85.107 | 0.00 | 0.00 |
| ATOM | 10890 | HE3 | MET | 727 | 38.010 | 72.725 | 83.804 | 0.00 | 0.00 |
| ATOM | 10891 | C   | MET | 727 | 35.934 | 66.902 | 85.640 | 0.00 | 0.00 |

|            |      |     |     |        |        |        |      |      |
|------------|------|-----|-----|--------|--------|--------|------|------|
| ATOM 10892 | O    | MET | 727 | 35.322 | 66.319 | 86.548 | 0.00 | 0.00 |
| ATOM 10893 | N    | VAL | 728 | 36.796 | 66.203 | 84.852 | 0.00 | 0.00 |
| ATOM 10894 | H    | VAL | 728 | 37.444 | 66.657 | 84.223 | 0.00 | 0.00 |
| ATOM 10895 | CA   | VAL | 728 | 36.742 | 64.738 | 84.925 | 0.00 | 0.00 |
| ATOM 10896 | HA   | VAL | 728 | 35.705 | 64.421 | 85.030 | 0.00 | 0.00 |
| ATOM 10897 | CB   | VAL | 728 | 37.490 | 64.173 | 83.686 | 0.00 | 0.00 |
| ATOM 10898 | HB   | VAL | 728 | 38.491 | 64.574 | 83.530 | 0.00 | 0.00 |
| ATOM 10899 | CG1  | VAL | 728 | 37.625 | 62.631 | 83.718 | 0.00 | 0.00 |
| ATOM 10900 | 1HG1 | VAL | 728 | 38.355 | 62.310 | 84.461 | 0.00 | 0.00 |
| ATOM 10901 | 2HG1 | VAL | 728 | 36.710 | 62.175 | 84.098 | 0.00 | 0.00 |
| ATOM 10902 | 3HG1 | VAL | 728 | 38.001 | 62.225 | 82.779 | 0.00 | 0.00 |
| ATOM 10903 | CG2  | VAL | 728 | 36.790 | 64.436 | 82.358 | 0.00 | 0.00 |
| ATOM 10904 | 1HG2 | VAL | 728 | 35.797 | 63.991 | 82.292 | 0.00 | 0.00 |
| ATOM 10905 | 2HG2 | VAL | 728 | 36.751 | 65.522 | 82.280 | 0.00 | 0.00 |
| ATOM 10906 | 3HG2 | VAL | 728 | 37.361 | 64.091 | 81.496 | 0.00 | 0.00 |
| ATOM 10907 | C    | VAL | 728 | 37.313 | 64.269 | 86.287 | 0.00 | 0.00 |
| ATOM 10908 | O    | VAL | 728 | 38.352 | 64.644 | 86.726 | 0.00 | 0.00 |
| ATOM 10909 | N    | HIE | 729 | 36.550 | 63.256 | 86.730 | 0.00 | 0.00 |
| ATOM 10910 | H    | HIE | 729 | 35.818 | 62.977 | 86.094 | 0.00 | 0.00 |
| ATOM 10911 | CA   | HIE | 729 | 36.671 | 62.555 | 88.022 | 0.00 | 0.00 |
| ATOM 10912 | HA   | HIE | 729 | 35.714 | 62.060 | 88.189 | 0.00 | 0.00 |
| ATOM 10913 | CB   | HIE | 729 | 37.688 | 61.385 | 87.881 | 0.00 | 0.00 |
| ATOM 10914 | HB2  | HIE | 729 | 37.637 | 61.175 | 86.813 | 0.00 | 0.00 |
| ATOM 10915 | HB3  | HIE | 729 | 38.688 | 61.798 | 88.014 | 0.00 | 0.00 |
| ATOM 10916 | CG   | HIE | 729 | 37.424 | 60.037 | 88.553 | 0.00 | 0.00 |
| ATOM 10917 | ND1  | HIE | 729 | 37.707 | 59.719 | 89.885 | 0.00 | 0.00 |

|      |       |      |     |     |        |        |        |      |      |
|------|-------|------|-----|-----|--------|--------|--------|------|------|
| ATOM | 10918 | CE1  | HIE | 729 | 37.174 | 58.498 | 90.077 | 0.00 | 0.00 |
| ATOM | 10919 | HE1  | HIE | 729 | 37.293 | 57.982 | 91.018 | 0.00 | 0.00 |
| ATOM | 10920 | NE2  | HIE | 729 | 36.466 | 58.083 | 89.002 | 0.00 | 0.00 |
| ATOM | 10921 | HE2  | HIE | 729 | 36.140 | 57.148 | 88.800 | 0.00 | 0.00 |
| ATOM | 10922 | CD2  | HIE | 729 | 36.533 | 59.072 | 88.067 | 0.00 | 0.00 |
| ATOM | 10923 | HD2  | HIE | 729 | 35.893 | 58.997 | 87.200 | 0.00 | 0.00 |
| ATOM | 10924 | C    | HIE | 729 | 36.971 | 63.420 | 89.159 | 0.00 | 0.00 |
| ATOM | 10925 | O    | HIE | 729 | 37.622 | 62.938 | 90.120 | 0.00 | 0.00 |
| ATOM | 10926 | N    | ASN | 730 | 36.712 | 64.768 | 89.159 | 0.00 | 0.00 |
| ATOM | 10927 | H    | ASN | 730 | 36.328 | 65.220 | 88.341 | 0.00 | 0.00 |
| ATOM | 10928 | CA   | ASN | 730 | 37.126 | 65.645 | 90.229 | 0.00 | 0.00 |
| ATOM | 10929 | HA   | ASN | 730 | 37.012 | 65.130 | 91.182 | 0.00 | 0.00 |
| ATOM | 10930 | CB   | ASN | 730 | 38.575 | 66.114 | 90.023 | 0.00 | 0.00 |
| ATOM | 10931 | HB2  | ASN | 730 | 38.681 | 66.687 | 89.102 | 0.00 | 0.00 |
| ATOM | 10932 | HB3  | ASN | 730 | 38.672 | 66.816 | 90.851 | 0.00 | 0.00 |
| ATOM | 10933 | CG   | ASN | 730 | 39.686 | 65.105 | 90.028 | 0.00 | 0.00 |
| ATOM | 10934 | OD1  | ASN | 730 | 40.386 | 64.990 | 91.024 | 0.00 | 0.00 |
| ATOM | 10935 | ND2  | ASN | 730 | 39.959 | 64.302 | 89.015 | 0.00 | 0.00 |
| ATOM | 10936 | 1HD2 | ASN | 730 | 40.797 | 63.737 | 88.997 | 0.00 | 0.00 |
| ATOM | 10937 | 2HD2 | ASN | 730 | 39.385 | 64.440 | 88.196 | 0.00 | 0.00 |
| ATOM | 10938 | C    | ASN | 730 | 36.185 | 66.942 | 90.430 | 0.00 | 0.00 |
| ATOM | 10939 | O    | ASN | 730 | 36.583 | 68.092 | 90.285 | 0.00 | 0.00 |
| ATOM | 10940 | N    | SER | 731 | 34.910 | 66.757 | 90.758 | 0.00 | 0.00 |
| ATOM | 10941 | H    | SER | 731 | 34.540 | 65.831 | 90.919 | 0.00 | 0.00 |
| ATOM | 10942 | CA   | SER | 731 | 33.812 | 67.727 | 90.972 | 0.00 | 0.00 |
| ATOM | 10943 | HA   | SER | 731 | 34.204 | 68.694 | 90.658 | 0.00 | 0.00 |



|            |      |     |     |        |        |        |      |      |
|------------|------|-----|-----|--------|--------|--------|------|------|
| ATOM 10944 | CB   | SER | 731 | 32.630 | 67.412 | 89.951 | 0.00 | 0.00 |
| ATOM 10945 | HB2  | SER | 731 | 31.818 | 68.134 | 90.036 | 0.00 | 0.00 |
| ATOM 10946 | HB3  | SER | 731 | 33.045 | 67.221 | 88.962 | 0.00 | 0.00 |
| ATOM 10947 | OG   | SER | 731 | 32.145 | 66.118 | 90.334 | 0.00 | 0.00 |
| ATOM 10948 | HG   | SER | 731 | 32.623 | 65.374 | 89.963 | 0.00 | 0.00 |
| ATOM 10949 | C    | SER | 731 | 33.285 | 67.905 | 92.340 | 0.00 | 0.00 |
| ATOM 10950 | O    | SER | 731 | 32.169 | 68.465 | 92.459 | 0.00 | 0.00 |
| ATOM 10951 | N    | LEU | 732 | 33.927 | 67.403 | 93.383 | 0.00 | 0.00 |
| ATOM 10952 | H    | LEU | 732 | 34.883 | 67.129 | 93.206 | 0.00 | 0.00 |
| ATOM 10953 | CA   | LEU | 732 | 33.320 | 67.473 | 94.695 | 0.00 | 0.00 |
| ATOM 10954 | HA   | LEU | 732 | 32.391 | 66.939 | 94.495 | 0.00 | 0.00 |
| ATOM 10955 | CB   | LEU | 732 | 34.078 | 66.661 | 95.702 | 0.00 | 0.00 |
| ATOM 10956 | HB2  | LEU | 732 | 34.211 | 65.722 | 95.165 | 0.00 | 0.00 |
| ATOM 10957 | HB3  | LEU | 732 | 35.113 | 66.961 | 95.868 | 0.00 | 0.00 |
| ATOM 10958 | CG   | LEU | 732 | 33.388 | 66.343 | 97.094 | 0.00 | 0.00 |
| ATOM 10959 | HG   | LEU | 732 | 33.240 | 67.259 | 97.666 | 0.00 | 0.00 |
| ATOM 10960 | CD1  | LEU | 732 | 32.010 | 65.702 | 96.853 | 0.00 | 0.00 |
| ATOM 10961 | 1HD1 | LEU | 732 | 31.366 | 66.334 | 96.242 | 0.00 | 0.00 |
| ATOM 10962 | 2HD1 | LEU | 732 | 32.177 | 64.745 | 96.359 | 0.00 | 0.00 |
| ATOM 10963 | 3HD1 | LEU | 732 | 31.504 | 65.589 | 97.812 | 0.00 | 0.00 |
| ATOM 10964 | CD2  | LEU | 732 | 34.270 | 65.566 | 97.945 | 0.00 | 0.00 |
| ATOM 10965 | 1HD2 | LEU | 732 | 34.300 | 64.515 | 97.655 | 0.00 | 0.00 |
| ATOM 10966 | 2HD2 | LEU | 732 | 35.256 | 66.008 | 97.802 | 0.00 | 0.00 |
| ATOM 10967 | 3HD2 | LEU | 732 | 33.878 | 65.536 | 98.962 | 0.00 | 0.00 |
| ATOM 10968 | C    | LEU | 732 | 33.198 | 68.913 | 95.143 | 0.00 | 0.00 |
| ATOM 10969 | O    | LEU | 732 | 34.108 | 69.686 | 95.265 | 0.00 | 0.00 |

|            |      |     |     |        |        |         |      |      |
|------------|------|-----|-----|--------|--------|---------|------|------|
| ATOM 10970 | N    | GLN | 733 | 32.024 | 69.263 | 95.679  | 0.00 | 0.00 |
| ATOM 10971 | H    | GLN | 733 | 31.274 | 68.590 | 95.750  | 0.00 | 0.00 |
| ATOM 10972 | CA   | GLN | 733 | 31.872 | 70.433 | 96.591  | 0.00 | 0.00 |
| ATOM 10973 | HA   | GLN | 733 | 32.683 | 71.136 | 96.401  | 0.00 | 0.00 |
| ATOM 10974 | CB   | GLN | 733 | 30.699 | 71.290 | 96.257  | 0.00 | 0.00 |
| ATOM 10975 | HB2  | GLN | 733 | 29.768 | 70.802 | 96.545  | 0.00 | 0.00 |
| ATOM 10976 | HB3  | GLN | 733 | 30.762 | 72.171 | 96.896  | 0.00 | 0.00 |
| ATOM 10977 | CG   | GLN | 733 | 30.503 | 71.685 | 94.804  | 0.00 | 0.00 |
| ATOM 10978 | HG2  | GLN | 733 | 30.649 | 70.785 | 94.207  | 0.00 | 0.00 |
| ATOM 10979 | HG3  | GLN | 733 | 29.502 | 72.085 | 94.643  | 0.00 | 0.00 |
| ATOM 10980 | CD   | GLN | 733 | 31.546 | 72.724 | 94.263  | 0.00 | 0.00 |
| ATOM 10981 | OE1  | GLN | 733 | 32.602 | 72.999 | 94.744  | 0.00 | 0.00 |
| ATOM 10982 | NE2  | GLN | 733 | 31.231 | 73.450 | 93.198  | 0.00 | 0.00 |
| ATOM 10983 | 1HE2 | GLN | 733 | 31.912 | 74.147 | 92.933  | 0.00 | 0.00 |
| ATOM 10984 | 2HE2 | GLN | 733 | 30.387 | 73.303 | 92.664  | 0.00 | 0.00 |
| ATOM 10985 | C    | GLN | 733 | 31.790 | 69.793 | 98.030  | 0.00 | 0.00 |
| ATOM 10986 | O    | GLN | 733 | 30.702 | 69.503 | 98.550  | 0.00 | 0.00 |
| ATOM 10987 | N    | PRO | 734 | 32.939 | 69.532 | 98.707  | 0.00 | 0.00 |
| ATOM 10988 | CD   | PRO | 734 | 34.312 | 69.940 | 98.305  | 0.00 | 0.00 |
| ATOM 10989 | HD2  | PRO | 734 | 34.720 | 69.208 | 97.608  | 0.00 | 0.00 |
| ATOM 10990 | HD3  | PRO | 734 | 34.403 | 70.939 | 97.877  | 0.00 | 0.00 |
| ATOM 10991 | CG   | PRO | 734 | 35.072 | 69.839 | 99.636  | 0.00 | 0.00 |
| ATOM 10992 | HG2  | PRO | 734 | 36.105 | 69.547 | 99.449  | 0.00 | 0.00 |
| ATOM 10993 | HG3  | PRO | 734 | 35.109 | 70.811 | 100.127 | 0.00 | 0.00 |
| ATOM 10994 | CB   | PRO | 734 | 34.379 | 68.906 | 100.506 | 0.00 | 0.00 |
| ATOM 10995 | HB2  | PRO | 734 | 34.814 | 67.909 | 100.439 | 0.00 | 0.00 |

|            |          |     |        |        |         |      |      |
|------------|----------|-----|--------|--------|---------|------|------|
| ATOM 10996 | HB3 PRO  | 734 | 34.481 | 69.343 | 101.499 | 0.00 | 0.00 |
| ATOM 10997 | CA PRO   | 734 | 32.916 | 68.998 | 100.063 | 0.00 | 0.00 |
| ATOM 10998 | HA PRO   | 734 | 32.450 | 68.013 | 100.052 | 0.00 | 0.00 |
| ATOM 10999 | C PRO    | 734 | 32.219 | 69.935 | 101.039 | 0.00 | 0.00 |
| ATOM 11000 | O PRO    | 734 | 32.218 | 71.134 | 100.871 | 0.00 | 0.00 |
| ATOM 11001 | N ASN    | 735 | 31.748 | 69.376 | 102.087 | 0.00 | 0.00 |
| ATOM 11002 | H ASN    | 735 | 31.755 | 68.366 | 102.083 | 0.00 | 0.00 |
| ATOM 11003 | CA ASN   | 735 | 30.851 | 69.940 | 103.127 | 0.00 | 0.00 |
| ATOM 11004 | HA ASN   | 735 | 30.268 | 70.648 | 102.537 | 0.00 | 0.00 |
| ATOM 11005 | CB ASN   | 735 | 29.849 | 68.888 | 103.730 | 0.00 | 0.00 |
| ATOM 11006 | HB2 ASN  | 735 | 29.161 | 68.524 | 102.967 | 0.00 | 0.00 |
| ATOM 11007 | HB3 ASN  | 735 | 30.385 | 68.037 | 104.150 | 0.00 | 0.00 |
| ATOM 11008 | CG ASN   | 735 | 28.967 | 69.337 | 104.917 | 0.00 | 0.00 |
| ATOM 11009 | OD1 ASN  | 735 | 28.880 | 70.444 | 105.405 | 0.00 | 0.00 |
| ATOM 11010 | ND2 ASN  | 735 | 28.327 | 68.292 | 105.456 | 0.00 | 0.00 |
| ATOM 11011 | 1HD2 ASN | 735 | 27.734 | 68.545 | 106.233 | 0.00 | 0.00 |
| ATOM 11012 | 2HD2 ASN | 735 | 28.257 | 67.375 | 105.037 | 0.00 | 0.00 |
| ATOM 11013 | C ASN    | 735 | 31.646 | 70.685 | 104.166 | 0.00 | 0.00 |
| ATOM 11014 | O ASN    | 735 | 31.953 | 70.152 | 105.184 | 0.00 | 0.00 |
| ATOM 11015 | N ILE    | 736 | 32.350 | 71.739 | 103.669 | 0.00 | 0.00 |
| ATOM 11016 | H ILE    | 736 | 32.158 | 72.100 | 102.746 | 0.00 | 0.00 |
| ATOM 11017 | CA ILE   | 736 | 33.665 | 72.300 | 104.082 | 0.00 | 0.00 |
| ATOM 11018 | HA ILE   | 736 | 34.165 | 71.520 | 104.656 | 0.00 | 0.00 |
| ATOM 11019 | CB ILE   | 736 | 34.633 | 72.584 | 102.928 | 0.00 | 0.00 |
| ATOM 11020 | HB ILE   | 736 | 34.619 | 71.744 | 102.234 | 0.00 | 0.00 |
| ATOM 11021 | CG2 ILE  | 736 | 34.056 | 73.813 | 102.108 | 0.00 | 0.00 |

|      |       |      |     |     |        |        |         |      |      |
|------|-------|------|-----|-----|--------|--------|---------|------|------|
| ATOM | 11022 | 1HG2 | ILE | 736 | 34.279 | 74.734 | 102.646 | 0.00 | 0.00 |
| ATOM | 11023 | 2HG2 | ILE | 736 | 34.359 | 73.902 | 101.064 | 0.00 | 0.00 |
| ATOM | 11024 | 3HG2 | ILE | 736 | 32.984 | 73.648 | 101.995 | 0.00 | 0.00 |
| ATOM | 11025 | CG1  | ILE | 736 | 36.111 | 72.785 | 103.379 | 0.00 | 0.00 |
| ATOM | 11026 | 2HG1 | ILE | 736 | 36.195 | 73.622 | 104.072 | 0.00 | 0.00 |
| ATOM | 11027 | 3HG1 | ILE | 736 | 36.522 | 71.832 | 103.709 | 0.00 | 0.00 |
| ATOM | 11028 | CD1  | ILE | 736 | 36.890 | 73.224 | 102.173 | 0.00 | 0.00 |
| ATOM | 11029 | 1HD1 | ILE | 736 | 37.896 | 73.499 | 102.489 | 0.00 | 0.00 |
| ATOM | 11030 | 2HD1 | ILE | 736 | 37.005 | 72.388 | 101.484 | 0.00 | 0.00 |
| ATOM | 11031 | 3HD1 | ILE | 736 | 36.464 | 74.130 | 101.741 | 0.00 | 0.00 |
| ATOM | 11032 | C    | ILE | 736 | 33.528 | 73.530 | 105.043 | 0.00 | 0.00 |
| ATOM | 11033 | O    | ILE | 736 | 32.753 | 74.403 | 104.870 | 0.00 | 0.00 |
| ATOM | 11034 | N    | THR | 737 | 34.472 | 73.586 | 105.937 | 0.00 | 0.00 |
| ATOM | 11035 | H    | THR | 737 | 35.189 | 72.876 | 105.888 | 0.00 | 0.00 |
| ATOM | 11036 | CA   | THR | 737 | 34.610 | 74.636 | 106.948 | 0.00 | 0.00 |
| ATOM | 11037 | HA   | THR | 737 | 34.373 | 75.610 | 106.520 | 0.00 | 0.00 |
| ATOM | 11038 | CB   | THR | 737 | 33.768 | 74.405 | 108.264 | 0.00 | 0.00 |
| ATOM | 11039 | HB   | THR | 737 | 34.017 | 75.140 | 109.029 | 0.00 | 0.00 |
| ATOM | 11040 | CG2  | THR | 737 | 32.271 | 74.590 | 107.877 | 0.00 | 0.00 |
| ATOM | 11041 | 1HG2 | THR | 737 | 31.621 | 74.579 | 108.751 | 0.00 | 0.00 |
| ATOM | 11042 | 2HG2 | THR | 737 | 32.140 | 75.556 | 107.389 | 0.00 | 0.00 |
| ATOM | 11043 | 3HG2 | THR | 737 | 31.890 | 73.763 | 107.277 | 0.00 | 0.00 |
| ATOM | 11044 | OG1  | THR | 737 | 33.768 | 73.025 | 108.635 | 0.00 | 0.00 |
| ATOM | 11045 | HG1  | THR | 737 | 33.559 | 72.949 | 109.569 | 0.00 | 0.00 |
| ATOM | 11046 | C    | THR | 737 | 36.131 | 74.788 | 107.339 | 0.00 | 0.00 |
| ATOM | 11047 | O    | THR | 737 | 36.875 | 73.920 | 106.987 | 0.00 | 0.00 |

|      |       |      |     |     |        |        |         |      |      |
|------|-------|------|-----|-----|--------|--------|---------|------|------|
| ATOM | 11048 | N    | VAL | 738 | 36.515 | 75.830 | 108.049 | 0.00 | 0.00 |
| ATOM | 11049 | H    | VAL | 738 | 35.899 | 76.611 | 108.229 | 0.00 | 0.00 |
| ATOM | 11050 | CA   | VAL | 738 | 37.765 | 75.943 | 108.811 | 0.00 | 0.00 |
| ATOM | 11051 | HA   | VAL | 738 | 38.258 | 74.975 | 108.721 | 0.00 | 0.00 |
| ATOM | 11052 | CB   | VAL | 738 | 38.689 | 77.122 | 108.292 | 0.00 | 0.00 |
| ATOM | 11053 | HB   | VAL | 738 | 39.467 | 77.470 | 108.972 | 0.00 | 0.00 |
| ATOM | 11054 | CG1  | VAL | 738 | 39.501 | 76.590 | 107.165 | 0.00 | 0.00 |
| ATOM | 11055 | 1HG1 | VAL | 738 | 40.034 | 75.701 | 107.500 | 0.00 | 0.00 |
| ATOM | 11056 | 2HG1 | VAL | 738 | 38.925 | 76.346 | 106.272 | 0.00 | 0.00 |
| ATOM | 11057 | 3HG1 | VAL | 738 | 40.225 | 77.320 | 106.802 | 0.00 | 0.00 |
| ATOM | 11058 | CG2  | VAL | 738 | 37.863 | 78.408 | 107.850 | 0.00 | 0.00 |
| ATOM | 11059 | 1HG2 | VAL | 738 | 37.427 | 78.873 | 108.734 | 0.00 | 0.00 |
| ATOM | 11060 | 2HG2 | VAL | 738 | 38.589 | 79.108 | 107.436 | 0.00 | 0.00 |
| ATOM | 11061 | 3HG2 | VAL | 738 | 37.261 | 78.152 | 106.978 | 0.00 | 0.00 |
| ATOM | 11062 | C    | VAL | 738 | 37.458 | 76.002 | 110.322 | 0.00 | 0.00 |
| ATOM | 11063 | O    | VAL | 738 | 36.304 | 76.211 | 110.738 | 0.00 | 0.00 |
| ATOM | 11064 | N    | ASP | 739 | 38.502 | 75.660 | 111.075 | 0.00 | 0.00 |
| ATOM | 11065 | H    | ASP | 739 | 39.419 | 75.495 | 110.685 | 0.00 | 0.00 |
| ATOM | 11066 | CA   | ASP | 739 | 38.472 | 75.662 | 112.505 | 0.00 | 0.00 |
| ATOM | 11067 | HA   | ASP | 739 | 37.462 | 75.425 | 112.839 | 0.00 | 0.00 |
| ATOM | 11068 | CB   | ASP | 739 | 39.477 | 74.610 | 112.969 | 0.00 | 0.00 |
| ATOM | 11069 | HB2  | ASP | 739 | 39.350 | 73.742 | 112.321 | 0.00 | 0.00 |
| ATOM | 11070 | HB3  | ASP | 739 | 40.482 | 74.856 | 112.628 | 0.00 | 0.00 |
| ATOM | 11071 | CG   | ASP | 739 | 39.410 | 74.364 | 114.477 | 0.00 | 0.00 |
| ATOM | 11072 | OD1  | ASP | 739 | 39.045 | 73.247 | 114.918 | 0.00 | 0.00 |
| ATOM | 11073 | OD2  | ASP | 739 | 39.907 | 75.183 | 115.247 | 0.00 | 0.00 |

|      |       |      |     |     |        |        |         |      |      |
|------|-------|------|-----|-----|--------|--------|---------|------|------|
| ATOM | 11074 | C    | ASP | 739 | 38.688 | 76.991 | 113.178 | 0.00 | 0.00 |
| ATOM | 11075 | O    | ASP | 739 | 39.561 | 77.691 | 112.654 | 0.00 | 0.00 |
| ATOM | 11076 | N    | ALA | 740 | 37.927 | 77.365 | 114.179 | 0.00 | 0.00 |
| ATOM | 11077 | H    | ALA | 740 | 37.305 | 76.739 | 114.671 | 0.00 | 0.00 |
| ATOM | 11078 | CA   | ALA | 740 | 37.771 | 78.777 | 114.536 | 0.00 | 0.00 |
| ATOM | 11079 | HA   | ALA | 740 | 37.896 | 79.293 | 113.584 | 0.00 | 0.00 |
| ATOM | 11080 | CB   | ALA | 740 | 36.363 | 79.028 | 114.961 | 0.00 | 0.00 |
| ATOM | 11081 | HB1  | ALA | 740 | 36.106 | 80.076 | 115.116 | 0.00 | 0.00 |
| ATOM | 11082 | HB2  | ALA | 740 | 35.815 | 78.709 | 114.075 | 0.00 | 0.00 |
| ATOM | 11083 | HB3  | ALA | 740 | 36.012 | 78.484 | 115.838 | 0.00 | 0.00 |
| ATOM | 11084 | C    | ALA | 740 | 38.899 | 79.286 | 115.483 | 0.00 | 0.00 |
| ATOM | 11085 | O    | ALA | 740 | 38.670 | 80.336 | 116.168 | 0.00 | 0.00 |
| ATOM | 11086 | N    | GLN | 741 | 39.936 | 78.563 | 115.635 | 0.00 | 0.00 |
| ATOM | 11087 | H    | GLN | 741 | 40.002 | 77.684 | 115.142 | 0.00 | 0.00 |
| ATOM | 11088 | CA   | GLN | 741 | 41.187 | 78.990 | 116.399 | 0.00 | 0.00 |
| ATOM | 11089 | HA   | GLN | 741 | 41.288 | 80.054 | 116.183 | 0.00 | 0.00 |
| ATOM | 11090 | CB   | GLN | 741 | 41.062 | 78.607 | 117.867 | 0.00 | 0.00 |
| ATOM | 11091 | HB2  | GLN | 741 | 40.017 | 78.498 | 118.158 | 0.00 | 0.00 |
| ATOM | 11092 | HB3  | GLN | 741 | 41.532 | 77.625 | 117.932 | 0.00 | 0.00 |
| ATOM | 11093 | CG   | GLN | 741 | 41.896 | 79.619 | 118.768 | 0.00 | 0.00 |
| ATOM | 11094 | HG2  | GLN | 741 | 42.942 | 79.403 | 118.552 | 0.00 | 0.00 |
| ATOM | 11095 | HG3  | GLN | 741 | 41.510 | 80.634 | 118.672 | 0.00 | 0.00 |
| ATOM | 11096 | CD   | GLN | 741 | 41.690 | 79.364 | 120.250 | 0.00 | 0.00 |
| ATOM | 11097 | OE1  | GLN | 741 | 42.413 | 78.585 | 120.894 | 0.00 | 0.00 |
| ATOM | 11098 | NE2  | GLN | 741 | 40.803 | 80.058 | 120.894 | 0.00 | 0.00 |
| ATOM | 11099 | 1HE2 | GLN | 741 | 40.651 | 79.972 | 121.889 | 0.00 | 0.00 |

ATOM 11100 2HE2 GLN 741 40.281 80.738 120.361 0.00 0.00  
ATOM 11101 C GLN 741 42.396 78.279 115.762 0.00 0.00  
ATOM 11102 O GLN 741 43.481 78.752 115.819 0.00 0.00  
ATOM 11103 N THR 742 42.274 77.133 115.086 0.00 0.00  
ATOM 11104 H THR 742 41.365 76.695 115.126 0.00 0.00  
ATOM 11105 CA THR 742 43.343 76.420 114.384 0.00 0.00  
ATOM 11106 HA THR 742 44.322 76.857 114.585 0.00 0.00  
ATOM 11107 CB THR 742 43.594 75.017 114.901 0.00 0.00  
ATOM 11108 HB THR 742 44.558 74.673 114.526 0.00 0.00  
ATOM 11109 CG2 THR 742 43.809 74.961 116.410 0.00 0.00  
ATOM 11110 1HG2 THR 742 42.863 75.054 116.943 0.00 0.00  
ATOM 11111 2HG2 THR 742 44.189 73.956 116.593 0.00 0.00  
ATOM 11112 3HG2 THR 742 44.451 75.744 116.812 0.00 0.00  
ATOM 11113 OG1 THR 742 42.515 74.204 114.548 0.00 0.00  
ATOM 11114 HG1 THR 742 41.780 74.751 114.837 0.00 0.00  
ATOM 11115 C THR 742 43.393 76.477 112.844 0.00 0.00  
ATOM 11116 O THR 742 44.298 75.934 112.194 0.00 0.00  
ATOM 11117 N TYR 743 42.397 77.183 112.245 0.00 0.00  
ATOM 11118 H TYR 743 41.542 77.423 112.727 0.00 0.00  
ATOM 11119 CA TYR 743 42.321 77.587 110.790 0.00 0.00  
ATOM 11120 HA TYR 743 41.299 77.927 110.622 0.00 0.00  
ATOM 11121 CB TYR 743 43.222 78.795 110.511 0.00 0.00  
ATOM 11122 HB2 TYR 743 44.233 78.388 110.494 0.00 0.00  
ATOM 11123 HB3 TYR 743 43.000 79.139 109.501 0.00 0.00  
ATOM 11124 CG TYR 743 43.110 79.889 111.533 0.00 0.00  
ATOM 11125 CD1 TYR 743 41.798 80.462 111.758 0.00 0.00

|      |       |     |     |     |        |        |         |      |      |
|------|-------|-----|-----|-----|--------|--------|---------|------|------|
| ATOM | 11126 | HD1 | TYR | 743 | 41.000 | 80.109 | 111.121 | 0.00 | 0.00 |
| ATOM | 11127 | CE1 | TYR | 743 | 41.647 | 81.307 | 112.901 | 0.00 | 0.00 |
| ATOM | 11128 | HE1 | TYR | 743 | 40.685 | 81.745 | 113.126 | 0.00 | 0.00 |
| ATOM | 11129 | CZ  | TYR | 743 | 42.760 | 81.653 | 113.659 | 0.00 | 0.00 |
| ATOM | 11130 | OH  | TYR | 743 | 42.530 | 82.332 | 114.809 | 0.00 | 0.00 |
| ATOM | 11131 | HH  | TYR | 743 | 41.610 | 82.322 | 115.083 | 0.00 | 0.00 |
| ATOM | 11132 | CE2 | TYR | 743 | 43.976 | 80.981 | 113.446 | 0.00 | 0.00 |
| ATOM | 11133 | HE2 | TYR | 743 | 44.817 | 81.208 | 114.085 | 0.00 | 0.00 |
| ATOM | 11134 | CD2 | TYR | 743 | 44.151 | 80.079 | 112.445 | 0.00 | 0.00 |
| ATOM | 11135 | HD2 | TYR | 743 | 45.059 | 79.528 | 112.254 | 0.00 | 0.00 |
| ATOM | 11136 | C   | TYR | 743 | 42.577 | 76.419 | 109.787 | 0.00 | 0.00 |
| ATOM | 11137 | O   | TYR | 743 | 42.954 | 76.624 | 108.652 | 0.00 | 0.00 |
| ATOM | 11138 | N   | GLU | 744 | 42.207 | 75.186 | 110.213 | 0.00 | 0.00 |
| ATOM | 11139 | H   | GLU | 744 | 42.005 | 75.077 | 111.197 | 0.00 | 0.00 |
| ATOM | 11140 | CA  | GLU | 744 | 42.338 | 73.902 | 109.518 | 0.00 | 0.00 |
| ATOM | 11141 | HA  | GLU | 744 | 43.070 | 73.992 | 108.715 | 0.00 | 0.00 |
| ATOM | 11142 | CB  | GLU | 744 | 43.018 | 72.981 | 110.592 | 0.00 | 0.00 |
| ATOM | 11143 | HB2 | GLU | 744 | 43.626 | 73.585 | 111.266 | 0.00 | 0.00 |
| ATOM | 11144 | HB3 | GLU | 744 | 42.270 | 72.458 | 111.188 | 0.00 | 0.00 |
| ATOM | 11145 | CG  | GLU | 744 | 43.936 | 71.959 | 109.888 | 0.00 | 0.00 |
| ATOM | 11146 | HG2 | GLU | 744 | 43.520 | 71.643 | 108.931 | 0.00 | 0.00 |
| ATOM | 11147 | HG3 | GLU | 744 | 44.837 | 72.519 | 109.635 | 0.00 | 0.00 |
| ATOM | 11148 | CD  | GLU | 744 | 44.177 | 70.814 | 110.801 | 0.00 | 0.00 |
| ATOM | 11149 | OE1 | GLU | 744 | 43.814 | 69.675 | 110.471 | 0.00 | 0.00 |
| ATOM | 11150 | OE2 | GLU | 744 | 44.779 | 71.103 | 111.836 | 0.00 | 0.00 |
| ATOM | 11151 | C   | GLU | 744 | 41.107 | 73.212 | 108.992 | 0.00 | 0.00 |



|      |       |      |     |     |        |        |         |      |      |
|------|-------|------|-----|-----|--------|--------|---------|------|------|
| ATOM | 11152 | O    | GLU | 744 | 40.060 | 73.256 | 109.598 | 0.00 | 0.00 |
| ATOM | 11153 | N    | VAL | 745 | 41.293 | 72.648 | 107.830 | 0.00 | 0.00 |
| ATOM | 11154 | H    | VAL | 745 | 42.187 | 72.553 | 107.371 | 0.00 | 0.00 |
| ATOM | 11155 | CA   | VAL | 745 | 40.032 | 72.212 | 107.126 | 0.00 | 0.00 |
| ATOM | 11156 | HA   | VAL | 745 | 39.353 | 73.063 | 107.063 | 0.00 | 0.00 |
| ATOM | 11157 | CB   | VAL | 745 | 40.282 | 71.935 | 105.676 | 0.00 | 0.00 |
| ATOM | 11158 | HB   | VAL | 745 | 40.598 | 72.849 | 105.174 | 0.00 | 0.00 |
| ATOM | 11159 | CG1  | VAL | 745 | 41.255 | 70.839 | 105.278 | 0.00 | 0.00 |
| ATOM | 11160 | 1HG1 | VAL | 745 | 41.081 | 69.958 | 105.895 | 0.00 | 0.00 |
| ATOM | 11161 | 2HG1 | VAL | 745 | 41.179 | 70.555 | 104.228 | 0.00 | 0.00 |
| ATOM | 11162 | 3HG1 | VAL | 745 | 42.309 | 71.019 | 105.489 | 0.00 | 0.00 |
| ATOM | 11163 | CG2  | VAL | 745 | 38.913 | 71.669 | 104.956 | 0.00 | 0.00 |
| ATOM | 11164 | 1HG2 | VAL | 745 | 39.117 | 71.745 | 103.888 | 0.00 | 0.00 |
| ATOM | 11165 | 2HG2 | VAL | 745 | 38.601 | 70.655 | 105.205 | 0.00 | 0.00 |
| ATOM | 11166 | 3HG2 | VAL | 745 | 38.164 | 72.345 | 105.369 | 0.00 | 0.00 |
| ATOM | 11167 | C    | VAL | 745 | 39.223 | 71.144 | 107.887 | 0.00 | 0.00 |
| ATOM | 11168 | O    | VAL | 745 | 39.824 | 70.156 | 108.347 | 0.00 | 0.00 |
| ATOM | 11169 | N    | ARG | 746 | 37.932 | 71.345 | 107.933 | 0.00 | 0.00 |
| ATOM | 11170 | H    | ARG | 746 | 37.664 | 72.224 | 107.515 | 0.00 | 0.00 |
| ATOM | 11171 | CA   | ARG | 746 | 36.900 | 70.460 | 108.571 | 0.00 | 0.00 |
| ATOM | 11172 | HA   | ARG | 746 | 37.423 | 69.536 | 108.819 | 0.00 | 0.00 |
| ATOM | 11173 | CB   | ARG | 746 | 36.336 | 71.179 | 109.774 | 0.00 | 0.00 |
| ATOM | 11174 | HB2  | ARG | 746 | 36.202 | 72.235 | 109.539 | 0.00 | 0.00 |
| ATOM | 11175 | HB3  | ARG | 746 | 35.301 | 70.899 | 109.969 | 0.00 | 0.00 |
| ATOM | 11176 | CG   | ARG | 746 | 37.304 | 71.006 | 110.968 | 0.00 | 0.00 |
| ATOM | 11177 | HG2  | ARG | 746 | 37.562 | 69.981 | 111.234 | 0.00 | 0.00 |

|      |       |      |     |     |        |        |         |      |      |
|------|-------|------|-----|-----|--------|--------|---------|------|------|
| ATOM | 11178 | HG3  | ARG | 746 | 38.202 | 71.581 | 110.742 | 0.00 | 0.00 |
| ATOM | 11179 | CD   | ARG | 746 | 36.660 | 71.645 | 112.193 | 0.00 | 0.00 |
| ATOM | 11180 | HD2  | ARG | 746 | 36.494 | 72.685 | 111.908 | 0.00 | 0.00 |
| ATOM | 11181 | HD3  | ARG | 746 | 35.688 | 71.181 | 112.363 | 0.00 | 0.00 |
| ATOM | 11182 | NE   | ARG | 746 | 37.381 | 71.570 | 113.439 | 0.00 | 0.00 |
| ATOM | 11183 | HE   | ARG | 746 | 37.917 | 72.382 | 113.711 | 0.00 | 0.00 |
| ATOM | 11184 | CZ   | ARG | 746 | 37.661 | 70.483 | 114.162 | 0.00 | 0.00 |
| ATOM | 11185 | NH1  | ARG | 746 | 37.015 | 69.334 | 114.045 | 0.00 | 0.00 |
| ATOM | 11186 | 1HH1 | ARG | 746 | 37.072 | 68.583 | 114.718 | 0.00 | 0.00 |
| ATOM | 11187 | 2HH1 | ARG | 746 | 36.186 | 69.242 | 113.476 | 0.00 | 0.00 |
| ATOM | 11188 | NH2  | ARG | 746 | 38.607 | 70.567 | 115.049 | 0.00 | 0.00 |
| ATOM | 11189 | 1HH2 | ARG | 746 | 38.855 | 69.695 | 115.495 | 0.00 | 0.00 |
| ATOM | 11190 | 2HH2 | ARG | 746 | 38.983 | 71.502 | 115.110 | 0.00 | 0.00 |
| ATOM | 11191 | C    | ARG | 746 | 35.850 | 70.034 | 107.506 | 0.00 | 0.00 |
| ATOM | 11192 | O    | ARG | 746 | 35.462 | 70.811 | 106.616 | 0.00 | 0.00 |
| ATOM | 11193 | N    | VAL | 747 | 35.479 | 68.738 | 107.501 | 0.00 | 0.00 |
| ATOM | 11194 | H    | VAL | 747 | 35.911 | 68.129 | 108.180 | 0.00 | 0.00 |
| ATOM | 11195 | CA   | VAL | 747 | 34.397 | 68.189 | 106.685 | 0.00 | 0.00 |
| ATOM | 11196 | HA   | VAL | 747 | 33.835 | 69.021 | 106.259 | 0.00 | 0.00 |
| ATOM | 11197 | CB   | VAL | 747 | 34.843 | 67.340 | 105.496 | 0.00 | 0.00 |
| ATOM | 11198 | HB   | VAL | 747 | 35.230 | 66.377 | 105.830 | 0.00 | 0.00 |
| ATOM | 11199 | CG1  | VAL | 747 | 33.643 | 67.140 | 104.552 | 0.00 | 0.00 |
| ATOM | 11200 | 1HG1 | VAL | 747 | 33.930 | 66.548 | 103.683 | 0.00 | 0.00 |
| ATOM | 11201 | 2HG1 | VAL | 747 | 32.915 | 66.473 | 105.014 | 0.00 | 0.00 |
| ATOM | 11202 | 3HG1 | VAL | 747 | 33.162 | 68.068 | 104.241 | 0.00 | 0.00 |
| ATOM | 11203 | CG2  | VAL | 747 | 35.881 | 68.112 | 104.639 | 0.00 | 0.00 |

|      |       |      |     |     |        |        |         |      |      |
|------|-------|------|-----|-----|--------|--------|---------|------|------|
| ATOM | 11204 | 1HG2 | VAL | 747 | 36.850 | 68.189 | 105.131 | 0.00 | 0.00 |
| ATOM | 11205 | 2HG2 | VAL | 747 | 36.136 | 67.563 | 103.732 | 0.00 | 0.00 |
| ATOM | 11206 | 3HG2 | VAL | 747 | 35.532 | 69.060 | 104.229 | 0.00 | 0.00 |
| ATOM | 11207 | C    | VAL | 747 | 33.308 | 67.466 | 107.577 | 0.00 | 0.00 |
| ATOM | 11208 | O    | VAL | 747 | 33.650 | 66.662 | 108.442 | 0.00 | 0.00 |
| ATOM | 11209 | N    | ASP | 748 | 32.024 | 67.822 | 107.351 | 0.00 | 0.00 |
| ATOM | 11210 | H    | ASP | 748 | 31.873 | 68.558 | 106.676 | 0.00 | 0.00 |
| ATOM | 11211 | CA   | ASP | 748 | 31.002 | 67.630 | 108.311 | 0.00 | 0.00 |
| ATOM | 11212 | HA   | ASP | 748 | 30.208 | 68.346 | 108.102 | 0.00 | 0.00 |
| ATOM | 11213 | CB   | ASP | 748 | 30.364 | 66.261 | 108.014 | 0.00 | 0.00 |
| ATOM | 11214 | HB2  | ASP | 748 | 30.198 | 66.192 | 106.938 | 0.00 | 0.00 |
| ATOM | 11215 | HB3  | ASP | 748 | 31.075 | 65.496 | 108.323 | 0.00 | 0.00 |
| ATOM | 11216 | CG   | ASP | 748 | 29.036 | 65.887 | 108.686 | 0.00 | 0.00 |
| ATOM | 11217 | OD1  | ASP | 748 | 28.956 | 64.692 | 109.247 | 0.00 | 0.00 |
| ATOM | 11218 | OD2  | ASP | 748 | 28.014 | 66.656 | 108.644 | 0.00 | 0.00 |
| ATOM | 11219 | C    | ASP | 748 | 31.458 | 67.729 | 109.729 | 0.00 | 0.00 |
| ATOM | 11220 | O    | ASP | 748 | 31.147 | 67.007 | 110.659 | 0.00 | 0.00 |
| ATOM | 11221 | N    | GLY | 749 | 32.282 | 68.734 | 109.983 | 0.00 | 0.00 |
| ATOM | 11222 | H    | GLY | 749 | 32.425 | 69.402 | 109.239 | 0.00 | 0.00 |
| ATOM | 11223 | CA   | GLY | 749 | 32.709 | 69.205 | 111.265 | 0.00 | 0.00 |
| ATOM | 11224 | HA2  | GLY | 749 | 32.889 | 70.280 | 111.269 | 0.00 | 0.00 |
| ATOM | 11225 | HA3  | GLY | 749 | 31.982 | 69.088 | 112.069 | 0.00 | 0.00 |
| ATOM | 11226 | C    | GLY | 749 | 34.001 | 68.544 | 111.748 | 0.00 | 0.00 |
| ATOM | 11227 | O    | GLY | 749 | 34.697 | 69.051 | 112.607 | 0.00 | 0.00 |
| ATOM | 11228 | N    | GLU | 750 | 34.458 | 67.429 | 111.154 | 0.00 | 0.00 |
| ATOM | 11229 | H    | GLU | 750 | 34.312 | 67.209 | 110.179 | 0.00 | 0.00 |

|      |       |      |     |     |        |        |         |      |      |
|------|-------|------|-----|-----|--------|--------|---------|------|------|
| ATOM | 11230 | CA   | GLU | 750 | 35.592 | 66.688 | 111.593 | 0.00 | 0.00 |
| ATOM | 11231 | HA   | GLU | 750 | 35.759 | 66.895 | 112.650 | 0.00 | 0.00 |
| ATOM | 11232 | CB   | GLU | 750 | 35.267 | 65.197 | 111.393 | 0.00 | 0.00 |
| ATOM | 11233 | HB2  | GLU | 750 | 34.285 | 65.078 | 111.852 | 0.00 | 0.00 |
| ATOM | 11234 | HB3  | GLU | 750 | 35.239 | 64.856 | 110.358 | 0.00 | 0.00 |
| ATOM | 11235 | CG   | GLU | 750 | 36.299 | 64.191 | 112.006 | 0.00 | 0.00 |
| ATOM | 11236 | HG2  | GLU | 750 | 35.917 | 63.187 | 111.826 | 0.00 | 0.00 |
| ATOM | 11237 | HG3  | GLU | 750 | 37.265 | 64.255 | 111.506 | 0.00 | 0.00 |
| ATOM | 11238 | CD   | GLU | 750 | 36.524 | 64.554 | 113.526 | 0.00 | 0.00 |
| ATOM | 11239 | OE1  | GLU | 750 | 35.601 | 64.357 | 114.379 | 0.00 | 0.00 |
| ATOM | 11240 | OE2  | GLU | 750 | 37.531 | 65.208 | 113.841 | 0.00 | 0.00 |
| ATOM | 11241 | C    | GLU | 750 | 36.874 | 67.119 | 110.768 | 0.00 | 0.00 |
| ATOM | 11242 | O    | GLU | 750 | 36.820 | 67.330 | 109.532 | 0.00 | 0.00 |
| ATOM | 11243 | N    | LEU | 751 | 38.030 | 67.082 | 111.402 | 0.00 | 0.00 |
| ATOM | 11244 | H    | LEU | 751 | 38.000 | 66.673 | 112.325 | 0.00 | 0.00 |
| ATOM | 11245 | CA   | LEU | 751 | 39.360 | 67.080 | 110.765 | 0.00 | 0.00 |
| ATOM | 11246 | HA   | LEU | 751 | 39.383 | 67.968 | 110.133 | 0.00 | 0.00 |
| ATOM | 11247 | CB   | LEU | 751 | 40.445 | 67.066 | 111.830 | 0.00 | 0.00 |
| ATOM | 11248 | HB2  | LEU | 751 | 40.347 | 66.141 | 112.399 | 0.00 | 0.00 |
| ATOM | 11249 | HB3  | LEU | 751 | 41.379 | 67.117 | 111.269 | 0.00 | 0.00 |
| ATOM | 11250 | CG   | LEU | 751 | 40.488 | 68.189 | 112.886 | 0.00 | 0.00 |
| ATOM | 11251 | HG   | LEU | 751 | 39.575 | 68.095 | 113.474 | 0.00 | 0.00 |
| ATOM | 11252 | CD1  | LEU | 751 | 41.731 | 67.976 | 113.748 | 0.00 | 0.00 |
| ATOM | 11253 | 1HD1 | LEU | 751 | 42.598 | 68.146 | 113.111 | 0.00 | 0.00 |
| ATOM | 11254 | 2HD1 | LEU | 751 | 41.749 | 68.679 | 114.581 | 0.00 | 0.00 |
| ATOM | 11255 | 3HD1 | LEU | 751 | 41.679 | 67.000 | 114.232 | 0.00 | 0.00 |

ATOM 11256 CD2 LEU 751 40.423 69.631 112.424 0.00 0.00  
ATOM 11257 1HD2 LEU 751 41.330 69.978 111.928 0.00 0.00  
ATOM 11258 2HD2 LEU 751 39.550 69.775 111.788 0.00 0.00  
ATOM 11259 3HD2 LEU 751 40.423 70.263 113.312 0.00 0.00  
ATOM 11260 C LEU 751 39.556 65.918 109.743 0.00 0.00  
ATOM 11261 O LEU 751 39.074 64.791 109.973 0.00 0.00  
ATOM 11262 N ILE 752 40.396 66.141 108.752 0.00 0.00  
ATOM 11263 H ILE 752 40.824 67.046 108.882 0.00 0.00  
ATOM 11264 CA ILE 752 40.542 65.358 107.540 0.00 0.00  
ATOM 11265 HA ILE 752 40.231 64.335 107.751 0.00 0.00  
ATOM 11266 CB ILE 752 39.752 65.941 106.347 0.00 0.00  
ATOM 11267 HB ILE 752 38.720 65.998 106.692 0.00 0.00  
ATOM 11268 CG2 ILE 752 40.224 67.339 106.004 0.00 0.00  
ATOM 11269 1HG2 ILE 752 40.001 67.962 106.870 0.00 0.00  
ATOM 11270 2HG2 ILE 752 41.289 67.408 105.785 0.00 0.00  
ATOM 11271 3HG2 ILE 752 39.671 67.756 105.162 0.00 0.00  
ATOM 11272 CG1 ILE 752 39.905 65.073 105.109 0.00 0.00  
ATOM 11273 2HG1 ILE 752 40.915 65.209 104.720 0.00 0.00  
ATOM 11274 3HG1 ILE 752 39.749 64.023 105.353 0.00 0.00  
ATOM 11275 CD1 ILE 752 38.880 65.423 104.026 0.00 0.00  
ATOM 11276 1HD1 ILE 752 37.883 65.566 104.444 0.00 0.00  
ATOM 11277 2HD1 ILE 752 39.193 66.375 103.597 0.00 0.00  
ATOM 11278 3HD1 ILE 752 38.859 64.641 103.268 0.00 0.00  
ATOM 11279 C ILE 752 42.085 65.175 107.235 0.00 0.00  
ATOM 11280 O ILE 752 42.528 64.194 106.635 0.00 0.00  
ATOM 11281 N THR 753 43.042 66.071 107.678 0.00 0.00

|      |       |      |     |     |        |        |         |      |      |
|------|-------|------|-----|-----|--------|--------|---------|------|------|
| ATOM | 11282 | H    | THR | 753 | 42.655 | 66.874 | 108.153 | 0.00 | 0.00 |
| ATOM | 11283 | CA   | THR | 753 | 44.534 | 65.982 | 107.425 | 0.00 | 0.00 |
| ATOM | 11284 | HA   | THR | 753 | 44.584 | 65.871 | 106.341 | 0.00 | 0.00 |
| ATOM | 11285 | CB   | THR | 753 | 45.302 | 67.256 | 107.768 | 0.00 | 0.00 |
| ATOM | 11286 | HB   | THR | 753 | 46.389 | 67.236 | 107.689 | 0.00 | 0.00 |
| ATOM | 11287 | CG2  | THR | 753 | 44.848 | 68.478 | 106.961 | 0.00 | 0.00 |
| ATOM | 11288 | 1HG2 | THR | 753 | 43.772 | 68.632 | 106.880 | 0.00 | 0.00 |
| ATOM | 11289 | 2HG2 | THR | 753 | 45.300 | 69.418 | 107.278 | 0.00 | 0.00 |
| ATOM | 11290 | 3HG2 | THR | 753 | 45.173 | 68.250 | 105.945 | 0.00 | 0.00 |
| ATOM | 11291 | OG1  | THR | 753 | 44.993 | 67.533 | 109.150 | 0.00 | 0.00 |
| ATOM | 11292 | HG1  | THR | 753 | 44.380 | 68.270 | 109.213 | 0.00 | 0.00 |
| ATOM | 11293 | C    | THR | 753 | 45.058 | 64.729 | 108.145 | 0.00 | 0.00 |
| ATOM | 11294 | O    | THR | 753 | 44.549 | 64.289 | 109.144 | 0.00 | 0.00 |
| ATOM | 11295 | N    | SER | 754 | 46.125 | 64.189 | 107.618 | 0.00 | 0.00 |
| ATOM | 11296 | H    | SER | 754 | 46.616 | 64.649 | 106.865 | 0.00 | 0.00 |
| ATOM | 11297 | CA   | SER | 754 | 46.876 | 62.946 | 108.058 | 0.00 | 0.00 |
| ATOM | 11298 | HA   | SER | 754 | 46.480 | 62.630 | 109.024 | 0.00 | 0.00 |
| ATOM | 11299 | CB   | SER | 754 | 46.708 | 61.878 | 106.993 | 0.00 | 0.00 |
| ATOM | 11300 | HB2  | SER | 754 | 47.040 | 60.885 | 107.298 | 0.00 | 0.00 |
| ATOM | 11301 | HB3  | SER | 754 | 45.630 | 61.851 | 106.836 | 0.00 | 0.00 |
| ATOM | 11302 | OG   | SER | 754 | 47.476 | 62.332 | 105.871 | 0.00 | 0.00 |
| ATOM | 11303 | HG   | SER | 754 | 47.135 | 63.142 | 105.487 | 0.00 | 0.00 |
| ATOM | 11304 | C    | SER | 754 | 48.340 | 63.211 | 108.347 | 0.00 | 0.00 |
| ATOM | 11305 | O    | SER | 754 | 48.923 | 64.228 | 107.944 | 0.00 | 0.00 |
| ATOM | 11306 | N    | GLU | 755 | 49.022 | 62.282 | 109.081 | 0.00 | 0.00 |
| ATOM | 11307 | H    | GLU | 755 | 48.657 | 61.346 | 109.191 | 0.00 | 0.00 |

|      |       |     |     |     |        |        |         |      |      |
|------|-------|-----|-----|-----|--------|--------|---------|------|------|
| ATOM | 11308 | CA  | GLU | 755 | 50.386 | 62.448 | 109.652 | 0.00 | 0.00 |
| ATOM | 11309 | HA  | GLU | 755 | 50.697 | 63.361 | 110.159 | 0.00 | 0.00 |
| ATOM | 11310 | CB  | GLU | 755 | 50.687 | 61.283 | 110.533 | 0.00 | 0.00 |
| ATOM | 11311 | HB2 | GLU | 755 | 50.424 | 60.383 | 109.977 | 0.00 | 0.00 |
| ATOM | 11312 | HB3 | GLU | 755 | 51.739 | 61.164 | 110.796 | 0.00 | 0.00 |
| ATOM | 11313 | CG  | GLU | 755 | 49.905 | 61.492 | 111.838 | 0.00 | 0.00 |
| ATOM | 11314 | HG2 | GLU | 755 | 50.424 | 60.956 | 112.632 | 0.00 | 0.00 |
| ATOM | 11315 | HG3 | GLU | 755 | 49.937 | 62.552 | 112.092 | 0.00 | 0.00 |
| ATOM | 11316 | CD  | GLU | 755 | 48.356 | 61.047 | 111.819 | 0.00 | 0.00 |
| ATOM | 11317 | OE1 | GLU | 755 | 47.501 | 61.719 | 112.521 | 0.00 | 0.00 |
| ATOM | 11318 | OE2 | GLU | 755 | 47.946 | 60.115 | 111.041 | 0.00 | 0.00 |
| ATOM | 11319 | C   | GLU | 755 | 51.451 | 62.373 | 108.465 | 0.00 | 0.00 |
| ATOM | 11320 | O   | GLU | 755 | 51.221 | 61.588 | 107.513 | 0.00 | 0.00 |
| ATOM | 11321 | N   | PRO | 756 | 52.571 | 63.135 | 108.525 | 0.00 | 0.00 |
| ATOM | 11322 | CD  | PRO | 756 | 52.951 | 63.898 | 109.719 | 0.00 | 0.00 |
| ATOM | 11323 | HD2 | PRO | 756 | 52.364 | 64.810 | 109.828 | 0.00 | 0.00 |
| ATOM | 11324 | HD3 | PRO | 756 | 52.904 | 63.267 | 110.606 | 0.00 | 0.00 |
| ATOM | 11325 | CG  | PRO | 756 | 54.366 | 64.460 | 109.522 | 0.00 | 0.00 |
| ATOM | 11326 | HG2 | PRO | 756 | 54.512 | 65.462 | 109.926 | 0.00 | 0.00 |
| ATOM | 11327 | HG3 | PRO | 756 | 55.063 | 63.718 | 109.910 | 0.00 | 0.00 |
| ATOM | 11328 | CB  | PRO | 756 | 54.404 | 64.559 | 108.007 | 0.00 | 0.00 |
| ATOM | 11329 | HB2 | PRO | 756 | 53.877 | 65.459 | 107.689 | 0.00 | 0.00 |
| ATOM | 11330 | HB3 | PRO | 756 | 55.376 | 64.678 | 107.529 | 0.00 | 0.00 |
| ATOM | 11331 | CA  | PRO | 756 | 53.556 | 63.433 | 107.419 | 0.00 | 0.00 |
| ATOM | 11332 | HA  | PRO | 756 | 53.049 | 63.879 | 106.564 | 0.00 | 0.00 |
| ATOM | 11333 | C   | PRO | 756 | 54.469 | 62.232 | 107.043 | 0.00 | 0.00 |

|      |       |     |     |     |        |        |         |      |      |
|------|-------|-----|-----|-----|--------|--------|---------|------|------|
| ATOM | 11334 | O   | PRO | 756 | 54.349 | 61.215 | 107.748 | 0.00 | 0.00 |
| ATOM | 11335 | N   | ALA | 757 | 55.312 | 62.269 | 106.021 | 0.00 | 0.00 |
| ATOM | 11336 | H   | ALA | 757 | 55.293 | 63.063 | 105.397 | 0.00 | 0.00 |
| ATOM | 11337 | CA  | ALA | 757 | 56.200 | 61.088 | 105.575 | 0.00 | 0.00 |
| ATOM | 11338 | HA  | ALA | 757 | 56.120 | 60.152 | 106.129 | 0.00 | 0.00 |
| ATOM | 11339 | CB  | ALA | 757 | 55.697 | 60.679 | 104.232 | 0.00 | 0.00 |
| ATOM | 11340 | HB1 | ALA | 757 | 56.049 | 59.652 | 104.128 | 0.00 | 0.00 |
| ATOM | 11341 | HB2 | ALA | 757 | 54.610 | 60.726 | 104.176 | 0.00 | 0.00 |
| ATOM | 11342 | HB3 | ALA | 757 | 56.140 | 61.242 | 103.410 | 0.00 | 0.00 |
| ATOM | 11343 | C   | ALA | 757 | 57.778 | 61.327 | 105.498 | 0.00 | 0.00 |
| ATOM | 11344 | O   | ALA | 757 | 58.238 | 62.464 | 105.325 | 0.00 | 0.00 |
| ATOM | 11345 | N   | ASP | 758 | 58.623 | 60.385 | 105.901 | 0.00 | 0.00 |
| ATOM | 11346 | H   | ASP | 758 | 58.247 | 59.518 | 106.258 | 0.00 | 0.00 |
| ATOM | 11347 | CA  | ASP | 758 | 60.115 | 60.451 | 106.132 | 0.00 | 0.00 |
| ATOM | 11348 | HA  | ASP | 758 | 60.447 | 61.480 | 106.272 | 0.00 | 0.00 |
| ATOM | 11349 | CB  | ASP | 758 | 60.385 | 59.801 | 107.487 | 0.00 | 0.00 |
| ATOM | 11350 | HB2 | ASP | 758 | 59.659 | 60.102 | 108.242 | 0.00 | 0.00 |
| ATOM | 11351 | HB3 | ASP | 758 | 60.231 | 58.734 | 107.328 | 0.00 | 0.00 |
| ATOM | 11352 | CG  | ASP | 758 | 61.793 | 60.000 | 107.975 | 0.00 | 0.00 |
| ATOM | 11353 | OD1 | ASP | 758 | 62.468 | 59.012 | 108.368 | 0.00 | 0.00 |
| ATOM | 11354 | OD2 | ASP | 758 | 62.308 | 61.144 | 108.050 | 0.00 | 0.00 |
| ATOM | 11355 | C   | ASP | 758 | 60.849 | 59.845 | 104.896 | 0.00 | 0.00 |
| ATOM | 11356 | O   | ASP | 758 | 61.912 | 60.264 | 104.543 | 0.00 | 0.00 |
| ATOM | 11357 | N   | VAL | 759 | 60.193 | 58.906 | 104.208 | 0.00 | 0.00 |
| ATOM | 11358 | H   | VAL | 759 | 59.217 | 58.853 | 104.464 | 0.00 | 0.00 |
| ATOM | 11359 | CA  | VAL | 759 | 60.659 | 58.179 | 103.034 | 0.00 | 0.00 |



|      |       |      |     |     |        |        |         |      |      |
|------|-------|------|-----|-----|--------|--------|---------|------|------|
| ATOM | 11360 | HA   | VAL | 759 | 61.370 | 58.775 | 102.461 | 0.00 | 0.00 |
| ATOM | 11361 | CB   | VAL | 759 | 61.348 | 56.867 | 103.402 | 0.00 | 0.00 |
| ATOM | 11362 | HB   | VAL | 759 | 60.603 | 56.168 | 103.783 | 0.00 | 0.00 |
| ATOM | 11363 | CG1  | VAL | 759 | 62.137 | 56.224 | 102.225 | 0.00 | 0.00 |
| ATOM | 11364 | 1HG1 | VAL | 759 | 61.424 | 55.701 | 101.588 | 0.00 | 0.00 |
| ATOM | 11365 | 2HG1 | VAL | 759 | 62.662 | 56.980 | 101.641 | 0.00 | 0.00 |
| ATOM | 11366 | 3HG1 | VAL | 759 | 62.804 | 55.405 | 102.494 | 0.00 | 0.00 |
| ATOM | 11367 | CG2  | VAL | 759 | 62.289 | 56.999 | 104.649 | 0.00 | 0.00 |
| ATOM | 11368 | 1HG2 | VAL | 759 | 61.686 | 57.403 | 105.462 | 0.00 | 0.00 |
| ATOM | 11369 | 2HG2 | VAL | 759 | 62.610 | 56.026 | 105.021 | 0.00 | 0.00 |
| ATOM | 11370 | 3HG2 | VAL | 759 | 63.142 | 57.669 | 104.543 | 0.00 | 0.00 |
| ATOM | 11371 | C    | VAL | 759 | 59.511 | 57.902 | 102.028 | 0.00 | 0.00 |
| ATOM | 11372 | O    | VAL | 759 | 58.447 | 57.480 | 102.459 | 0.00 | 0.00 |
| ATOM | 11373 | N    | LEU | 760 | 59.720 | 58.008 | 100.737 | 0.00 | 0.00 |
| ATOM | 11374 | H    | LEU | 760 | 60.586 | 58.402 | 100.399 | 0.00 | 0.00 |
| ATOM | 11375 | CA   | LEU | 760 | 58.684 | 57.653 | 99.726  | 0.00 | 0.00 |
| ATOM | 11376 | HA   | LEU | 760 | 57.905 | 57.007 | 100.130 | 0.00 | 0.00 |
| ATOM | 11377 | CB   | LEU | 760 | 58.187 | 58.924 | 99.103  | 0.00 | 0.00 |
| ATOM | 11378 | HB2  | LEU | 760 | 58.988 | 59.576 | 98.754  | 0.00 | 0.00 |
| ATOM | 11379 | HB3  | LEU | 760 | 57.567 | 58.687 | 98.239  | 0.00 | 0.00 |
| ATOM | 11380 | CG   | LEU | 760 | 57.251 | 59.649 | 100.049 | 0.00 | 0.00 |
| ATOM | 11381 | HG   | LEU | 760 | 57.683 | 59.852 | 101.029 | 0.00 | 0.00 |
| ATOM | 11382 | CD1  | LEU | 760 | 56.899 | 61.014 | 99.474  | 0.00 | 0.00 |
| ATOM | 11383 | 1HD1 | LEU | 760 | 56.225 | 61.489 | 100.186 | 0.00 | 0.00 |
| ATOM | 11384 | 2HD1 | LEU | 760 | 57.763 | 61.678 | 99.455  | 0.00 | 0.00 |
| ATOM | 11385 | 3HD1 | LEU | 760 | 56.474 | 61.009 | 98.470  | 0.00 | 0.00 |

|      |       |      |     |     |        |        |         |      |      |
|------|-------|------|-----|-----|--------|--------|---------|------|------|
| ATOM | 11386 | CD2  | LEU | 760 | 55.966 | 58.822 | 100.362 | 0.00 | 0.00 |
| ATOM | 11387 | 1HD2 | LEU | 760 | 56.334 | 58.061 | 101.050 | 0.00 | 0.00 |
| ATOM | 11388 | 2HD2 | LEU | 760 | 55.187 | 59.493 | 100.724 | 0.00 | 0.00 |
| ATOM | 11389 | 3HD2 | LEU | 760 | 55.717 | 58.346 | 99.413  | 0.00 | 0.00 |
| ATOM | 11390 | C    | LEU | 760 | 59.269 | 56.816 | 98.566  | 0.00 | 0.00 |
| ATOM | 11391 | O    | LEU | 760 | 60.498 | 56.924 | 98.363  | 0.00 | 0.00 |
| ATOM | 11392 | N    | PRO | 761 | 58.403 | 56.051 | 97.804  | 0.00 | 0.00 |
| ATOM | 11393 | CD   | PRO | 761 | 57.053 | 55.673 | 98.117  | 0.00 | 0.00 |
| ATOM | 11394 | HD2  | PRO | 761 | 56.424 | 56.503 | 98.440  | 0.00 | 0.00 |
| ATOM | 11395 | HD3  | PRO | 761 | 56.941 | 54.815 | 98.780  | 0.00 | 0.00 |
| ATOM | 11396 | CG   | PRO | 761 | 56.535 | 55.134 | 96.760  | 0.00 | 0.00 |
| ATOM | 11397 | HG2  | PRO | 761 | 55.703 | 54.442 | 96.888  | 0.00 | 0.00 |
| ATOM | 11398 | HG3  | PRO | 761 | 56.114 | 55.944 | 96.164  | 0.00 | 0.00 |
| ATOM | 11399 | CB   | PRO | 761 | 57.720 | 54.538 | 96.142  | 0.00 | 0.00 |
| ATOM | 11400 | HB2  | PRO | 761 | 58.031 | 53.570 | 96.535  | 0.00 | 0.00 |
| ATOM | 11401 | HB3  | PRO | 761 | 57.525 | 54.404 | 95.078  | 0.00 | 0.00 |
| ATOM | 11402 | CA   | PRO | 761 | 58.811 | 55.587 | 96.479  | 0.00 | 0.00 |
| ATOM | 11403 | HA   | PRO | 761 | 59.704 | 54.965 | 96.543  | 0.00 | 0.00 |
| ATOM | 11404 | C    | PRO | 761 | 58.938 | 56.686 | 95.399  | 0.00 | 0.00 |
| ATOM | 11405 | O    | PRO | 761 | 58.638 | 57.911 | 95.521  | 0.00 | 0.00 |
| ATOM | 11406 | N    | MET | 762 | 59.390 | 56.252 | 94.213  | 0.00 | 0.00 |
| ATOM | 11407 | H    | MET | 762 | 59.677 | 55.296 | 94.064  | 0.00 | 0.00 |
| ATOM | 11408 | CA   | MET | 762 | 59.676 | 57.112 | 93.042  | 0.00 | 0.00 |
| ATOM | 11409 | HA   | MET | 762 | 60.086 | 56.550 | 92.203  | 0.00 | 0.00 |
| ATOM | 11410 | CB   | MET | 762 | 58.388 | 57.742 | 92.416  | 0.00 | 0.00 |
| ATOM | 11411 | HB2  | MET | 762 | 58.070 | 58.538 | 93.089  | 0.00 | 0.00 |

|      |       |     |     |     |        |        |        |      |      |
|------|-------|-----|-----|-----|--------|--------|--------|------|------|
| ATOM | 11412 | HB3 | MET | 762 | 58.598 | 58.317 | 91.514 | 0.00 | 0.00 |
| ATOM | 11413 | CG  | MET | 762 | 57.142 | 56.833 | 92.225 | 0.00 | 0.00 |
| ATOM | 11414 | HG2 | MET | 762 | 57.302 | 56.161 | 91.382 | 0.00 | 0.00 |
| ATOM | 11415 | HG3 | MET | 762 | 56.994 | 56.137 | 93.051 | 0.00 | 0.00 |
| ATOM | 11416 | SD  | MET | 762 | 55.673 | 57.915 | 91.978 | 0.00 | 0.00 |
| ATOM | 11417 | CE  | MET | 762 | 55.837 | 58.184 | 90.204 | 0.00 | 0.00 |
| ATOM | 11418 | HE1 | MET | 762 | 54.928 | 58.696 | 89.888 | 0.00 | 0.00 |
| ATOM | 11419 | HE2 | MET | 762 | 56.673 | 58.823 | 89.918 | 0.00 | 0.00 |
| ATOM | 11420 | HE3 | MET | 762 | 55.955 | 57.252 | 89.651 | 0.00 | 0.00 |
| ATOM | 11421 | C   | MET | 762 | 60.760 | 58.138 | 93.338 | 0.00 | 0.00 |
| ATOM | 11422 | O   | MET | 762 | 60.871 | 59.192 | 92.707 | 0.00 | 0.00 |
| ATOM | 11423 | N   | ALA | 763 | 61.569 | 57.894 | 94.384 | 0.00 | 0.00 |
| ATOM | 11424 | H   | ALA | 763 | 61.545 | 56.974 | 94.798 | 0.00 | 0.00 |
| ATOM | 11425 | CA  | ALA | 763 | 62.658 | 58.812 | 94.807 | 0.00 | 0.00 |
| ATOM | 11426 | HA  | ALA | 763 | 62.615 | 59.722 | 94.209 | 0.00 | 0.00 |
| ATOM | 11427 | CB  | ALA | 763 | 62.379 | 59.026 | 96.294 | 0.00 | 0.00 |
| ATOM | 11428 | HB1 | ALA | 763 | 62.254 | 58.049 | 96.760 | 0.00 | 0.00 |
| ATOM | 11429 | HB2 | ALA | 763 | 63.139 | 59.656 | 96.757 | 0.00 | 0.00 |
| ATOM | 11430 | HB3 | ALA | 763 | 61.443 | 59.559 | 96.462 | 0.00 | 0.00 |
| ATOM | 11431 | C   | ALA | 763 | 64.118 | 58.334 | 94.481 | 0.00 | 0.00 |
| ATOM | 11432 | O   | ALA | 763 | 64.436 | 57.875 | 93.385 | 0.00 | 0.00 |
| ATOM | 11433 | N   | GLN | 764 | 64.998 | 58.419 | 95.515 | 0.00 | 0.00 |
| ATOM | 11434 | H   | GLN | 764 | 64.610 | 58.558 | 96.437 | 0.00 | 0.00 |
| ATOM | 11435 | CA  | GLN | 764 | 66.460 | 58.430 | 95.456 | 0.00 | 0.00 |
| ATOM | 11436 | HA  | GLN | 764 | 66.750 | 59.349 | 94.947 | 0.00 | 0.00 |
| ATOM | 11437 | CB  | GLN | 764 | 66.943 | 58.571 | 96.891 | 0.00 | 0.00 |

|      |       |      |     |     |        |        |        |      |      |
|------|-------|------|-----|-----|--------|--------|--------|------|------|
| ATOM | 11438 | HB2  | GLN | 764 | 66.207 | 59.186 | 97.407 | 0.00 | 0.00 |
| ATOM | 11439 | HB3  | GLN | 764 | 67.027 | 57.612 | 97.402 | 0.00 | 0.00 |
| ATOM | 11440 | CG   | GLN | 764 | 68.399 | 59.049 | 96.905 | 0.00 | 0.00 |
| ATOM | 11441 | HG2  | GLN | 764 | 69.039 | 58.340 | 96.380 | 0.00 | 0.00 |
| ATOM | 11442 | HG3  | GLN | 764 | 68.572 | 60.025 | 96.452 | 0.00 | 0.00 |
| ATOM | 11443 | CD   | GLN | 764 | 68.768 | 59.097 | 98.388 | 0.00 | 0.00 |
| ATOM | 11444 | OE1  | GLN | 764 | 69.438 | 58.139 | 98.922 | 0.00 | 0.00 |
| ATOM | 11445 | NE2  | GLN | 764 | 68.413 | 60.171 | 99.069 | 0.00 | 0.00 |
| ATOM | 11446 | 1HE2 | GLN | 764 | 68.801 | 60.258 | 99.997 | 0.00 | 0.00 |
| ATOM | 11447 | 2HE2 | GLN | 764 | 68.054 | 60.998 | 98.614 | 0.00 | 0.00 |
| ATOM | 11448 | C    | GLN | 764 | 67.025 | 57.207 | 94.733 | 0.00 | 0.00 |
| ATOM | 11449 | O    | GLN | 764 | 68.163 | 57.151 | 94.260 | 0.00 | 0.00 |
| ATOM | 11450 | N    | ARG | 765 | 66.187 | 56.171 | 94.630 | 0.00 | 0.00 |
| ATOM | 11451 | H    | ARG | 765 | 65.338 | 56.334 | 95.152 | 0.00 | 0.00 |
| ATOM | 11452 | CA   | ARG | 765 | 66.417 | 54.903 | 93.868 | 0.00 | 0.00 |
| ATOM | 11453 | HA   | ARG | 765 | 67.267 | 54.306 | 94.199 | 0.00 | 0.00 |
| ATOM | 11454 | CB   | ARG | 765 | 65.137 | 54.015 | 94.002 | 0.00 | 0.00 |
| ATOM | 11455 | HB2  | ARG | 765 | 64.670 | 54.085 | 94.984 | 0.00 | 0.00 |
| ATOM | 11456 | HB3  | ARG | 765 | 64.359 | 54.368 | 93.325 | 0.00 | 0.00 |
| ATOM | 11457 | CG   | ARG | 765 | 65.530 | 52.532 | 93.741 | 0.00 | 0.00 |
| ATOM | 11458 | HG2  | ARG | 765 | 66.154 | 52.490 | 92.848 | 0.00 | 0.00 |
| ATOM | 11459 | HG3  | ARG | 765 | 66.164 | 52.300 | 94.597 | 0.00 | 0.00 |
| ATOM | 11460 | CD   | ARG | 765 | 64.354 | 51.473 | 93.738 | 0.00 | 0.00 |
| ATOM | 11461 | HD2  | ARG | 765 | 63.917 | 51.487 | 92.740 | 0.00 | 0.00 |
| ATOM | 11462 | HD3  | ARG | 765 | 64.743 | 50.456 | 93.791 | 0.00 | 0.00 |
| ATOM | 11463 | NE   | ARG | 765 | 63.249 | 51.690 | 94.754 | 0.00 | 0.00 |

|      |       |      |     |     |        |        |        |      |      |
|------|-------|------|-----|-----|--------|--------|--------|------|------|
| ATOM | 11464 | HE   | ARG | 765 | 62.379 | 52.007 | 94.350 | 0.00 | 0.00 |
| ATOM | 11465 | CZ   | ARG | 765 | 63.206 | 51.405 | 95.987 | 0.00 | 0.00 |
| ATOM | 11466 | NH1  | ARG | 765 | 64.227 | 50.885 | 96.533 | 0.00 | 0.00 |
| ATOM | 11467 | 1HH1 | ARG | 765 | 64.239 | 50.902 | 97.543 | 0.00 | 0.00 |
| ATOM | 11468 | 2HH1 | ARG | 765 | 65.014 | 50.674 | 95.935 | 0.00 | 0.00 |
| ATOM | 11469 | NH2  | ARG | 765 | 62.228 | 51.789 | 96.796 | 0.00 | 0.00 |
| ATOM | 11470 | 1HH2 | ARG | 765 | 62.359 | 51.755 | 97.797 | 0.00 | 0.00 |
| ATOM | 11471 | 2HH2 | ARG | 765 | 61.397 | 52.223 | 96.420 | 0.00 | 0.00 |
| ATOM | 11472 | C    | ARG | 765 | 66.743 | 55.121 | 92.377 | 0.00 | 0.00 |
| ATOM | 11473 | O    | ARG | 765 | 67.609 | 54.412 | 91.837 | 0.00 | 0.00 |
| ATOM | 11474 | N    | TYR | 766 | 66.248 | 56.109 | 91.708 | 0.00 | 0.00 |
| ATOM | 11475 | H    | TYR | 766 | 65.642 | 56.733 | 92.221 | 0.00 | 0.00 |
| ATOM | 11476 | CA   | TYR | 766 | 66.150 | 56.229 | 90.262 | 0.00 | 0.00 |
| ATOM | 11477 | HA   | TYR | 766 | 66.599 | 55.325 | 89.849 | 0.00 | 0.00 |
| ATOM | 11478 | CB   | TYR | 766 | 64.713 | 56.423 | 89.802 | 0.00 | 0.00 |
| ATOM | 11479 | HB2  | TYR | 766 | 64.342 | 57.330 | 90.279 | 0.00 | 0.00 |
| ATOM | 11480 | HB3  | TYR | 766 | 64.781 | 56.521 | 88.718 | 0.00 | 0.00 |
| ATOM | 11481 | CG   | TYR | 766 | 63.653 | 55.314 | 90.106 | 0.00 | 0.00 |
| ATOM | 11482 | CD1  | TYR | 766 | 62.811 | 55.511 | 91.216 | 0.00 | 0.00 |
| ATOM | 11483 | HD1  | TYR | 766 | 62.828 | 56.450 | 91.750 | 0.00 | 0.00 |
| ATOM | 11484 | CE1  | TYR | 766 | 61.791 | 54.605 | 91.576 | 0.00 | 0.00 |
| ATOM | 11485 | HE1  | TYR | 766 | 61.289 | 54.719 | 92.526 | 0.00 | 0.00 |
| ATOM | 11486 | CZ   | TYR | 766 | 61.573 | 53.510 | 90.792 | 0.00 | 0.00 |
| ATOM | 11487 | OH   | TYR | 766 | 60.553 | 52.631 | 91.111 | 0.00 | 0.00 |
| ATOM | 11488 | HH   | TYR | 766 | 60.048 | 52.930 | 91.871 | 0.00 | 0.00 |
| ATOM | 11489 | CE2  | TYR | 766 | 62.440 | 53.215 | 89.699 | 0.00 | 0.00 |

|      |       |     |     |     |        |        |        |      |      |
|------|-------|-----|-----|-----|--------|--------|--------|------|------|
| ATOM | 11490 | HE2 | TYR | 766 | 62.485 | 52.240 | 89.236 | 0.00 | 0.00 |
| ATOM | 11491 | CD2 | TYR | 766 | 63.503 | 54.096 | 89.395 | 0.00 | 0.00 |
| ATOM | 11492 | HD2 | TYR | 766 | 64.194 | 53.836 | 88.606 | 0.00 | 0.00 |
| ATOM | 11493 | C   | TYR | 766 | 67.052 | 57.321 | 89.616 | 0.00 | 0.00 |
| ATOM | 11494 | O   | TYR | 766 | 67.304 | 57.275 | 88.440 | 0.00 | 0.00 |
| ATOM | 11495 | N   | PHE | 767 | 67.438 | 58.307 | 90.435 | 0.00 | 0.00 |
| ATOM | 11496 | H   | PHE | 767 | 67.123 | 58.318 | 91.394 | 0.00 | 0.00 |
| ATOM | 11497 | CA  | PHE | 767 | 68.121 | 59.552 | 90.012 | 0.00 | 0.00 |
| ATOM | 11498 | HA  | PHE | 767 | 68.117 | 59.617 | 88.924 | 0.00 | 0.00 |
| ATOM | 11499 | CB  | PHE | 767 | 67.303 | 60.830 | 90.352 | 0.00 | 0.00 |
| ATOM | 11500 | HB2 | PHE | 767 | 67.235 | 60.976 | 91.429 | 0.00 | 0.00 |
| ATOM | 11501 | HB3 | PHE | 767 | 67.946 | 61.568 | 89.872 | 0.00 | 0.00 |
| ATOM | 11502 | CG  | PHE | 767 | 65.965 | 60.955 | 89.589 | 0.00 | 0.00 |
| ATOM | 11503 | CD1 | PHE | 767 | 64.738 | 60.280 | 90.046 | 0.00 | 0.00 |
| ATOM | 11504 | HD1 | PHE | 767 | 64.763 | 59.671 | 90.938 | 0.00 | 0.00 |
| ATOM | 11505 | CE1 | PHE | 767 | 63.517 | 60.299 | 89.315 | 0.00 | 0.00 |
| ATOM | 11506 | HE1 | PHE | 767 | 62.578 | 59.936 | 89.706 | 0.00 | 0.00 |
| ATOM | 11507 | CZ  | PHE | 767 | 63.484 | 61.029 | 88.157 | 0.00 | 0.00 |
| ATOM | 11508 | HZ  | PHE | 767 | 62.561 | 61.140 | 87.607 | 0.00 | 0.00 |
| ATOM | 11509 | CE2 | PHE | 767 | 64.621 | 61.684 | 87.732 | 0.00 | 0.00 |
| ATOM | 11510 | HE2 | PHE | 767 | 64.459 | 62.175 | 86.784 | 0.00 | 0.00 |
| ATOM | 11511 | CD2 | PHE | 767 | 65.908 | 61.546 | 88.356 | 0.00 | 0.00 |
| ATOM | 11512 | HD2 | PHE | 767 | 66.636 | 62.248 | 87.977 | 0.00 | 0.00 |
| ATOM | 11513 | C   | PHE | 767 | 69.543 | 59.626 | 90.593 | 0.00 | 0.00 |
| ATOM | 11514 | O   | PHE | 767 | 69.684 | 59.667 | 91.843 | 0.00 | 0.00 |
| ATOM | 11515 | N   | LEU | 768 | 70.609 | 59.707 | 89.830 | 0.00 | 0.00 |

|      |       |      |     |     |        |        |        |      |      |
|------|-------|------|-----|-----|--------|--------|--------|------|------|
| ATOM | 11516 | H    | LEU | 768 | 70.485 | 59.688 | 88.828 | 0.00 | 0.00 |
| ATOM | 11517 | CA   | LEU | 768 | 71.987 | 59.973 | 90.343 | 0.00 | 0.00 |
| ATOM | 11518 | HA   | LEU | 768 | 72.341 | 59.140 | 90.950 | 0.00 | 0.00 |
| ATOM | 11519 | CB   | LEU | 768 | 72.949 | 60.213 | 89.148 | 0.00 | 0.00 |
| ATOM | 11520 | HB2  | LEU | 768 | 72.781 | 59.485 | 88.354 | 0.00 | 0.00 |
| ATOM | 11521 | HB3  | LEU | 768 | 72.552 | 61.114 | 88.680 | 0.00 | 0.00 |
| ATOM | 11522 | CG   | LEU | 768 | 74.421 | 60.308 | 89.348 | 0.00 | 0.00 |
| ATOM | 11523 | HG   | LEU | 768 | 74.743 | 60.948 | 90.169 | 0.00 | 0.00 |
| ATOM | 11524 | CD1  | LEU | 768 | 75.012 | 59.042 | 89.964 | 0.00 | 0.00 |
| ATOM | 11525 | 1HD1 | LEU | 768 | 75.025 | 58.215 | 89.255 | 0.00 | 0.00 |
| ATOM | 11526 | 2HD1 | LEU | 768 | 76.072 | 59.239 | 90.129 | 0.00 | 0.00 |
| ATOM | 11527 | 3HD1 | LEU | 768 | 74.546 | 58.987 | 90.948 | 0.00 | 0.00 |
| ATOM | 11528 | CD2  | LEU | 768 | 75.101 | 60.794 | 88.069 | 0.00 | 0.00 |
| ATOM | 11529 | 1HD2 | LEU | 768 | 75.151 | 60.040 | 87.284 | 0.00 | 0.00 |
| ATOM | 11530 | 2HD2 | LEU | 768 | 74.586 | 61.701 | 87.753 | 0.00 | 0.00 |
| ATOM | 11531 | 3HD2 | LEU | 768 | 76.161 | 60.936 | 88.282 | 0.00 | 0.00 |
| ATOM | 11532 | C    | LEU | 768 | 72.013 | 61.209 | 91.289 | 0.00 | 0.00 |
| ATOM | 11533 | O    | LEU | 768 | 72.894 | 61.202 | 92.178 | 0.00 | 0.00 |
| ATOM | 11534 | N    | PHC | 769 | 71.186 | 62.201 | 91.076 | 0.00 | 0.00 |
| ATOM | 11535 | H    | PHC | 769 | 70.371 | 61.960 | 90.531 | 0.00 | 0.00 |
| ATOM | 11536 | CA   | PHC | 769 | 71.070 | 63.433 | 91.872 | 0.00 | 0.00 |
| ATOM | 11537 | HA   | PHC | 769 | 71.464 | 63.150 | 92.848 | 0.00 | 0.00 |
| ATOM | 11538 | CB   | PHC | 769 | 71.960 | 64.407 | 91.150 | 0.00 | 0.00 |
| ATOM | 11539 | HB2  | PHC | 769 | 71.843 | 64.293 | 90.073 | 0.00 | 0.00 |
| ATOM | 11540 | HB3  | PHC | 769 | 71.613 | 65.433 | 91.272 | 0.00 | 0.00 |
| ATOM | 11541 | CG   | PHC | 769 | 73.450 | 64.333 | 91.334 | 0.00 | 0.00 |

|      |       |     |     |     |        |        |        |      |      |
|------|-------|-----|-----|-----|--------|--------|--------|------|------|
| ATOM | 11542 | CD1 | PHC | 769 | 74.256 | 63.757 | 90.289 | 0.00 | 0.00 |
| ATOM | 11543 | HD1 | PHC | 769 | 73.765 | 63.358 | 89.414 | 0.00 | 0.00 |
| ATOM | 11544 | CE1 | PHC | 769 | 75.621 | 63.781 | 90.318 | 0.00 | 0.00 |
| ATOM | 11545 | HE1 | PHC | 769 | 76.285 | 63.462 | 89.528 | 0.00 | 0.00 |
| ATOM | 11546 | CZ  | PHC | 769 | 76.260 | 64.175 | 91.499 | 0.00 | 0.00 |
| ATOM | 11547 | HZ  | PHC | 769 | 77.339 | 64.208 | 91.486 | 0.00 | 0.00 |
| ATOM | 11548 | CE2 | PHC | 769 | 75.504 | 64.585 | 92.609 | 0.00 | 0.00 |
| ATOM | 11549 | HE2 | PHC | 769 | 75.972 | 64.906 | 93.528 | 0.00 | 0.00 |
| ATOM | 11550 | CD2 | PHC | 769 | 74.117 | 64.689 | 92.506 | 0.00 | 0.00 |
| ATOM | 11551 | HD2 | PHC | 769 | 73.550 | 65.010 | 93.368 | 0.00 | 0.00 |
| ATOM | 11552 | C   | PHC | 769 | 69.647 | 63.999 | 91.985 | 0.00 | 0.00 |
| ATOM | 11553 | O   | PHC | 769 | 68.809 | 63.635 | 91.119 | 0.00 | 0.00 |
| ATOM | 11554 | OXT | PHC | 769 | 69.335 | 64.708 | 92.916 | 0.00 | 0.00 |
| ATOM | 11555 | O   | ONB | 770 | 52.735 | 81.299 | 92.932 | 0.00 | 0.00 |
| ATOM | 11556 | H1  | ONB | 770 | 52.711 | 80.342 | 93.004 | 0.00 | 0.00 |
| ATOM | 11557 | H1  | ON1 | 771 | 52.659 | 82.804 | 92.473 | 0.00 | 0.00 |
| ATOM | 11558 | O   | ON1 | 771 | 52.579 | 83.124 | 93.429 | 0.00 | 0.00 |
| ATOM | 11559 | H2  | ON1 | 771 | 53.197 | 82.525 | 93.962 | 0.00 | 0.00 |
| ATOM | 11560 | H1  | ON2 | 772 | 54.574 | 82.786 | 92.081 | 0.00 | 0.00 |
| ATOM | 11561 | O   | ON2 | 772 | 54.978 | 81.862 | 92.161 | 0.00 | 0.00 |
| ATOM | 11562 | H2  | ON2 | 772 | 54.570 | 81.311 | 92.905 | 0.00 | 0.00 |
| TER  | 0     |     |     | 0   |        |        |        |      |      |
| ATOM | 11563 | NI  | NI1 | 773 | 70.369 | 45.139 | 56.511 | 0.00 | 0.00 |
| ATOM | 11564 | NI  | NI2 | 774 | 70.778 | 48.246 | 58.039 | 0.00 | 0.00 |
| ATOM | 11565 | N   | MEN | 775 | 78.581 | 82.201 | 92.280 | 0.00 | 0.00 |
| ATOM | 11566 | H1  | MEN | 775 | 77.669 | 82.379 | 91.883 | 0.00 | 0.00 |



|      |       |     |     |     |        |        |        |      |      |
|------|-------|-----|-----|-----|--------|--------|--------|------|------|
| ATOM | 11567 | H2  | MEN | 775 | 79.020 | 83.092 | 92.095 | 0.00 | 0.00 |
| ATOM | 11568 | H3  | MEN | 775 | 78.567 | 82.015 | 93.273 | 0.00 | 0.00 |
| ATOM | 11569 | CA  | MEN | 775 | 79.300 | 81.090 | 91.704 | 0.00 | 0.00 |
| ATOM | 11570 | HA  | MEN | 775 | 80.270 | 81.005 | 92.193 | 0.00 | 0.00 |
| ATOM | 11571 | CB  | MEN | 775 | 78.530 | 79.756 | 91.945 | 0.00 | 0.00 |
| ATOM | 11572 | HB2 | MEN | 775 | 78.218 | 79.819 | 92.988 | 0.00 | 0.00 |
| ATOM | 11573 | HB3 | MEN | 775 | 77.571 | 79.684 | 91.432 | 0.00 | 0.00 |
| ATOM | 11574 | CG  | MEN | 775 | 79.289 | 78.451 | 91.832 | 0.00 | 0.00 |
| ATOM | 11575 | HG2 | MEN | 775 | 80.193 | 78.492 | 92.441 | 0.00 | 0.00 |
| ATOM | 11576 | HG3 | MEN | 775 | 78.705 | 77.661 | 92.304 | 0.00 | 0.00 |
| ATOM | 11577 | SD  | MEN | 775 | 79.873 | 77.877 | 90.249 | 0.00 | 0.00 |
| ATOM | 11578 | CE  | MEN | 775 | 80.668 | 76.351 | 90.942 | 0.00 | 0.00 |
| ATOM | 11579 | HE1 | MEN | 775 | 81.522 | 76.671 | 91.538 | 0.00 | 0.00 |
| ATOM | 11580 | HE2 | MEN | 775 | 79.881 | 75.813 | 91.470 | 0.00 | 0.00 |
| ATOM | 11581 | HE3 | MEN | 775 | 80.976 | 75.713 | 90.114 | 0.00 | 0.00 |
| ATOM | 11582 | C   | MEN | 775 | 79.593 | 81.385 | 90.235 | 0.00 | 0.00 |
| ATOM | 11583 | O   | MEN | 775 | 80.683 | 81.624 | 89.837 | 0.00 | 0.00 |
| ATOM | 11584 | N   | GLU | 776 | 78.548 | 81.445 | 89.373 | 0.00 | 0.00 |
| ATOM | 11585 | H   | GLU | 776 | 77.632 | 81.355 | 89.789 | 0.00 | 0.00 |
| ATOM | 11586 | CA  | GLU | 776 | 78.595 | 81.951 | 88.022 | 0.00 | 0.00 |
| ATOM | 11587 | HA  | GLU | 776 | 77.666 | 81.693 | 87.514 | 0.00 | 0.00 |
| ATOM | 11588 | CB  | GLU | 776 | 78.730 | 83.502 | 88.115 | 0.00 | 0.00 |
| ATOM | 11589 | HB2 | GLU | 776 | 79.531 | 83.805 | 88.791 | 0.00 | 0.00 |
| ATOM | 11590 | HB3 | GLU | 776 | 78.933 | 83.891 | 87.117 | 0.00 | 0.00 |
| ATOM | 11591 | CG  | GLU | 776 | 77.544 | 84.361 | 88.628 | 0.00 | 0.00 |
| ATOM | 11592 | HG2 | GLU | 776 | 77.821 | 85.408 | 88.505 | 0.00 | 0.00 |

|      |       |      |     |     |        |        |        |      |      |
|------|-------|------|-----|-----|--------|--------|--------|------|------|
| ATOM | 11593 | HG3  | GLU | 776 | 76.585 | 84.236 | 88.125 | 0.00 | 0.00 |
| ATOM | 11594 | CD   | GLU | 776 | 77.367 | 84.011 | 90.144 | 0.00 | 0.00 |
| ATOM | 11595 | OE1  | GLU | 776 | 76.558 | 83.097 | 90.431 | 0.00 | 0.00 |
| ATOM | 11596 | OE2  | GLU | 776 | 78.152 | 84.556 | 90.892 | 0.00 | 0.00 |
| ATOM | 11597 | C    | GLU | 776 | 79.690 | 81.293 | 87.177 | 0.00 | 0.00 |
| ATOM | 11598 | O    | GLU | 776 | 80.667 | 81.868 | 86.721 | 0.00 | 0.00 |
| ATOM | 11599 | N    | LEU | 777 | 79.627 | 79.956 | 87.166 | 0.00 | 0.00 |
| ATOM | 11600 | H    | LEU | 777 | 78.905 | 79.448 | 87.656 | 0.00 | 0.00 |
| ATOM | 11601 | CA   | LEU | 777 | 80.633 | 79.215 | 86.429 | 0.00 | 0.00 |
| ATOM | 11602 | HA   | LEU | 777 | 81.622 | 79.440 | 86.827 | 0.00 | 0.00 |
| ATOM | 11603 | CB   | LEU | 777 | 80.525 | 77.693 | 86.682 | 0.00 | 0.00 |
| ATOM | 11604 | HB2  | LEU | 777 | 80.080 | 77.462 | 87.651 | 0.00 | 0.00 |
| ATOM | 11605 | HB3  | LEU | 777 | 79.945 | 77.222 | 85.889 | 0.00 | 0.00 |
| ATOM | 11606 | CG   | LEU | 777 | 81.913 | 77.075 | 86.553 | 0.00 | 0.00 |
| ATOM | 11607 | HG   | LEU | 777 | 82.390 | 77.375 | 85.620 | 0.00 | 0.00 |
| ATOM | 11608 | CD1  | LEU | 777 | 82.843 | 77.401 | 87.774 | 0.00 | 0.00 |
| ATOM | 11609 | 1HD1 | LEU | 777 | 82.345 | 77.207 | 88.725 | 0.00 | 0.00 |
| ATOM | 11610 | 2HD1 | LEU | 777 | 83.812 | 76.907 | 87.706 | 0.00 | 0.00 |
| ATOM | 11611 | 3HD1 | LEU | 777 | 83.142 | 78.449 | 87.788 | 0.00 | 0.00 |
| ATOM | 11612 | CD2  | LEU | 777 | 81.882 | 75.560 | 86.482 | 0.00 | 0.00 |
| ATOM | 11613 | 1HD2 | LEU | 777 | 81.157 | 75.130 | 85.792 | 0.00 | 0.00 |
| ATOM | 11614 | 2HD2 | LEU | 777 | 82.878 | 75.175 | 86.262 | 0.00 | 0.00 |
| ATOM | 11615 | 3HD2 | LEU | 777 | 81.697 | 75.204 | 87.496 | 0.00 | 0.00 |
| ATOM | 11616 | C    | LEU | 777 | 80.570 | 79.647 | 84.969 | 0.00 | 0.00 |
| ATOM | 11617 | O    | LEU | 777 | 79.526 | 79.363 | 84.390 | 0.00 | 0.00 |
| ATOM | 11618 | N    | THR | 778 | 81.612 | 80.163 | 84.300 | 0.00 | 0.00 |

|      |       |      |     |     |        |        |        |      |      |
|------|-------|------|-----|-----|--------|--------|--------|------|------|
| ATOM | 11619 | H    | THR | 778 | 82.379 | 80.482 | 84.876 | 0.00 | 0.00 |
| ATOM | 11620 | CA   | THR | 778 | 81.503 | 80.716 | 82.899 | 0.00 | 0.00 |
| ATOM | 11621 | HA   | THR | 778 | 80.519 | 81.167 | 82.771 | 0.00 | 0.00 |
| ATOM | 11622 | CB   | THR | 778 | 82.454 | 81.941 | 82.688 | 0.00 | 0.00 |
| ATOM | 11623 | HB   | THR | 778 | 82.354 | 82.300 | 81.664 | 0.00 | 0.00 |
| ATOM | 11624 | CG2  | THR | 778 | 82.128 | 83.092 | 83.676 | 0.00 | 0.00 |
| ATOM | 11625 | 1HG2 | THR | 778 | 82.696 | 83.924 | 83.259 | 0.00 | 0.00 |
| ATOM | 11626 | 2HG2 | THR | 778 | 81.066 | 83.295 | 83.539 | 0.00 | 0.00 |
| ATOM | 11627 | 3HG2 | THR | 778 | 82.368 | 82.889 | 84.720 | 0.00 | 0.00 |
| ATOM | 11628 | OG1  | THR | 778 | 83.732 | 81.436 | 82.846 | 0.00 | 0.00 |
| ATOM | 11629 | HG1  | THR | 778 | 83.811 | 81.323 | 83.796 | 0.00 | 0.00 |
| ATOM | 11630 | C    | THR | 778 | 81.733 | 79.590 | 81.875 | 0.00 | 0.00 |
| ATOM | 11631 | O    | THR | 778 | 82.376 | 78.601 | 82.141 | 0.00 | 0.00 |
| ATOM | 11632 | N    | PRO | 779 | 81.305 | 79.731 | 80.572 | 0.00 | 0.00 |
| ATOM | 11633 | CD   | PRO | 779 | 80.178 | 80.605 | 80.232 | 0.00 | 0.00 |
| ATOM | 11634 | HD2  | PRO | 779 | 80.509 | 81.620 | 80.014 | 0.00 | 0.00 |
| ATOM | 11635 | HD3  | PRO | 779 | 79.321 | 80.532 | 80.901 | 0.00 | 0.00 |
| ATOM | 11636 | CG   | PRO | 779 | 79.604 | 80.054 | 78.902 | 0.00 | 0.00 |
| ATOM | 11637 | HG2  | PRO | 779 | 78.783 | 79.365 | 79.100 | 0.00 | 0.00 |
| ATOM | 11638 | HG3  | PRO | 779 | 79.417 | 80.867 | 78.200 | 0.00 | 0.00 |
| ATOM | 11639 | CB   | PRO | 779 | 80.859 | 79.382 | 78.327 | 0.00 | 0.00 |
| ATOM | 11640 | HB2  | PRO | 779 | 80.542 | 78.613 | 77.623 | 0.00 | 0.00 |
| ATOM | 11641 | HB3  | PRO | 779 | 81.549 | 80.072 | 77.841 | 0.00 | 0.00 |
| ATOM | 11642 | CA   | PRO | 779 | 81.560 | 78.750 | 79.504 | 0.00 | 0.00 |
| ATOM | 11643 | HA   | PRO | 779 | 81.008 | 77.856 | 79.794 | 0.00 | 0.00 |
| ATOM | 11644 | C    | PRO | 779 | 83.063 | 78.395 | 79.394 | 0.00 | 0.00 |

|      |       |      |     |     |        |        |        |      |      |
|------|-------|------|-----|-----|--------|--------|--------|------|------|
| ATOM | 11645 | O    | PRO | 779 | 83.216 | 77.185 | 79.427 | 0.00 | 0.00 |
| ATOM | 11646 | N    | ARG | 780 | 83.970 | 79.317 | 79.489 | 0.00 | 0.00 |
| ATOM | 11647 | H    | ARG | 780 | 83.549 | 80.235 | 79.504 | 0.00 | 0.00 |
| ATOM | 11648 | CA   | ARG | 780 | 85.462 | 79.128 | 79.605 | 0.00 | 0.00 |
| ATOM | 11649 | HA   | ARG | 780 | 85.839 | 78.686 | 78.683 | 0.00 | 0.00 |
| ATOM | 11650 | CB   | ARG | 780 | 86.120 | 80.515 | 79.721 | 0.00 | 0.00 |
| ATOM | 11651 | HB2  | ARG | 780 | 85.835 | 81.021 | 78.798 | 0.00 | 0.00 |
| ATOM | 11652 | HB3  | ARG | 780 | 85.696 | 81.002 | 80.598 | 0.00 | 0.00 |
| ATOM | 11653 | CG   | ARG | 780 | 87.656 | 80.315 | 79.789 | 0.00 | 0.00 |
| ATOM | 11654 | HG2  | ARG | 780 | 87.953 | 79.869 | 78.840 | 0.00 | 0.00 |
| ATOM | 11655 | HG3  | ARG | 780 | 87.949 | 79.640 | 80.594 | 0.00 | 0.00 |
| ATOM | 11656 | CD   | ARG | 780 | 88.358 | 81.621 | 80.128 | 0.00 | 0.00 |
| ATOM | 11657 | HD2  | ARG | 780 | 89.237 | 81.644 | 79.484 | 0.00 | 0.00 |
| ATOM | 11658 | HD3  | ARG | 780 | 87.640 | 82.426 | 79.974 | 0.00 | 0.00 |
| ATOM | 11659 | NE   | ARG | 780 | 88.744 | 81.744 | 81.559 | 0.00 | 0.00 |
| ATOM | 11660 | HE   | ARG | 780 | 88.926 | 80.891 | 82.069 | 0.00 | 0.00 |
| ATOM | 11661 | CZ   | ARG | 780 | 89.079 | 82.896 | 82.121 | 0.00 | 0.00 |
| ATOM | 11662 | NH1  | ARG | 780 | 89.460 | 82.990 | 83.336 | 0.00 | 0.00 |
| ATOM | 11663 | 1HH1 | ARG | 780 | 89.907 | 83.846 | 83.632 | 0.00 | 0.00 |
| ATOM | 11664 | 2HH1 | ARG | 780 | 89.644 | 82.096 | 83.768 | 0.00 | 0.00 |
| ATOM | 11665 | NH2  | ARG | 780 | 88.809 | 84.083 | 81.648 | 0.00 | 0.00 |
| ATOM | 11666 | 1HH2 | ARG | 780 | 88.953 | 84.867 | 82.268 | 0.00 | 0.00 |
| ATOM | 11667 | 2HH2 | ARG | 780 | 88.333 | 84.181 | 80.762 | 0.00 | 0.00 |
| ATOM | 11668 | C    | ARG | 780 | 85.814 | 78.249 | 80.712 | 0.00 | 0.00 |
| ATOM | 11669 | O    | ARG | 780 | 86.599 | 77.350 | 80.530 | 0.00 | 0.00 |
| ATOM | 11670 | N    | GLU | 781 | 85.205 | 78.435 | 81.872 | 0.00 | 0.00 |

|      |       |     |     |     |        |        |        |      |      |
|------|-------|-----|-----|-----|--------|--------|--------|------|------|
| ATOM | 11671 | H   | GLU | 781 | 84.415 | 79.063 | 81.896 | 0.00 | 0.00 |
| ATOM | 11672 | CA  | GLU | 781 | 85.501 | 77.633 | 83.086 | 0.00 | 0.00 |
| ATOM | 11673 | HA  | GLU | 781 | 86.573 | 77.606 | 83.283 | 0.00 | 0.00 |
| ATOM | 11674 | CB  | GLU | 781 | 84.925 | 78.333 | 84.343 | 0.00 | 0.00 |
| ATOM | 11675 | HB2 | GLU | 781 | 83.913 | 78.668 | 84.117 | 0.00 | 0.00 |
| ATOM | 11676 | HB3 | GLU | 781 | 84.735 | 77.579 | 85.108 | 0.00 | 0.00 |
| ATOM | 11677 | CG  | GLU | 781 | 85.721 | 79.516 | 84.883 | 0.00 | 0.00 |
| ATOM | 11678 | HG2 | GLU | 781 | 86.727 | 79.198 | 85.158 | 0.00 | 0.00 |
| ATOM | 11679 | HG3 | GLU | 781 | 86.052 | 80.110 | 84.031 | 0.00 | 0.00 |
| ATOM | 11680 | CD  | GLU | 781 | 84.928 | 80.393 | 85.818 | 0.00 | 0.00 |
| ATOM | 11681 | OE1 | GLU | 781 | 85.218 | 80.336 | 87.060 | 0.00 | 0.00 |
| ATOM | 11682 | OE2 | GLU | 781 | 83.966 | 81.102 | 85.391 | 0.00 | 0.00 |
| ATOM | 11683 | C   | GLU | 781 | 84.943 | 76.217 | 82.949 | 0.00 | 0.00 |
| ATOM | 11684 | O   | GLU | 781 | 85.613 | 75.221 | 83.259 | 0.00 | 0.00 |
| ATOM | 11685 | N   | LYS | 782 | 83.772 | 76.065 | 82.255 | 0.00 | 0.00 |
| ATOM | 11686 | H   | LYS | 782 | 83.265 | 76.903 | 82.009 | 0.00 | 0.00 |
| ATOM | 11687 | CA  | LYS | 782 | 83.190 | 74.718 | 81.985 | 0.00 | 0.00 |
| ATOM | 11688 | HA  | LYS | 782 | 83.441 | 74.070 | 82.824 | 0.00 | 0.00 |
| ATOM | 11689 | CB  | LYS | 782 | 81.640 | 74.887 | 81.857 | 0.00 | 0.00 |
| ATOM | 11690 | HB2 | LYS | 782 | 81.487 | 75.557 | 81.010 | 0.00 | 0.00 |
| ATOM | 11691 | HB3 | LYS | 782 | 81.206 | 73.943 | 81.529 | 0.00 | 0.00 |
| ATOM | 11692 | CG  | LYS | 782 | 80.784 | 75.386 | 83.040 | 0.00 | 0.00 |
| ATOM | 11693 | HG2 | LYS | 782 | 80.661 | 74.603 | 83.788 | 0.00 | 0.00 |
| ATOM | 11694 | HG3 | LYS | 782 | 81.265 | 76.289 | 83.414 | 0.00 | 0.00 |
| ATOM | 11695 | CD  | LYS | 782 | 79.417 | 76.003 | 82.710 | 0.00 | 0.00 |
| ATOM | 11696 | HD2 | LYS | 782 | 79.039 | 76.448 | 83.630 | 0.00 | 0.00 |

|      |       |     |     |     |        |        |        |      |      |
|------|-------|-----|-----|-----|--------|--------|--------|------|------|
| ATOM | 11697 | HD3 | LYS | 782 | 79.548 | 76.732 | 81.909 | 0.00 | 0.00 |
| ATOM | 11698 | CE  | LYS | 782 | 78.400 | 74.896 | 82.343 | 0.00 | 0.00 |
| ATOM | 11699 | HE2 | LYS | 782 | 78.892 | 74.260 | 81.607 | 0.00 | 0.00 |
| ATOM | 11700 | HE3 | LYS | 782 | 78.060 | 74.337 | 83.215 | 0.00 | 0.00 |
| ATOM | 11701 | NZ  | LYS | 782 | 77.338 | 75.483 | 81.548 | 0.00 | 0.00 |
| ATOM | 11702 | HZ1 | LYS | 782 | 77.826 | 76.022 | 80.846 | 0.00 | 0.00 |
| ATOM | 11703 | HZ2 | LYS | 782 | 76.860 | 74.781 | 81.002 | 0.00 | 0.00 |
| ATOM | 11704 | HZ3 | LYS | 782 | 76.766 | 76.039 | 82.167 | 0.00 | 0.00 |
| ATOM | 11705 | C   | LYS | 782 | 83.880 | 73.988 | 80.859 | 0.00 | 0.00 |
| ATOM | 11706 | O   | LYS | 782 | 83.807 | 72.796 | 80.842 | 0.00 | 0.00 |
| ATOM | 11707 | N   | ASP | 783 | 84.529 | 74.590 | 79.892 | 0.00 | 0.00 |
| ATOM | 11708 | H   | ASP | 783 | 84.439 | 75.596 | 79.908 | 0.00 | 0.00 |
| ATOM | 11709 | CA  | ASP | 783 | 85.195 | 73.937 | 78.820 | 0.00 | 0.00 |
| ATOM | 11710 | HA  | ASP | 783 | 84.659 | 73.123 | 78.331 | 0.00 | 0.00 |
| ATOM | 11711 | CB  | ASP | 783 | 85.547 | 74.954 | 77.680 | 0.00 | 0.00 |
| ATOM | 11712 | HB2 | ASP | 783 | 86.338 | 75.624 | 78.018 | 0.00 | 0.00 |
| ATOM | 11713 | HB3 | ASP | 783 | 84.624 | 75.498 | 77.483 | 0.00 | 0.00 |
| ATOM | 11714 | CG  | ASP | 783 | 85.828 | 74.366 | 76.307 | 0.00 | 0.00 |
| ATOM | 11715 | OD1 | ASP | 783 | 86.715 | 74.989 | 75.686 | 0.00 | 0.00 |
| ATOM | 11716 | OD2 | ASP | 783 | 85.159 | 73.410 | 75.889 | 0.00 | 0.00 |
| ATOM | 11717 | C   | ASP | 783 | 86.482 | 73.350 | 79.416 | 0.00 | 0.00 |
| ATOM | 11718 | O   | ASP | 783 | 86.790 | 72.179 | 79.313 | 0.00 | 0.00 |
| ATOM | 11719 | N   | LYS | 784 | 87.320 | 74.118 | 80.174 | 0.00 | 0.00 |
| ATOM | 11720 | H   | LYS | 784 | 87.117 | 75.102 | 80.283 | 0.00 | 0.00 |
| ATOM | 11721 | CA  | LYS | 784 | 88.593 | 73.578 | 80.719 | 0.00 | 0.00 |
| ATOM | 11722 | HA  | LYS | 784 | 89.100 | 73.163 | 79.847 | 0.00 | 0.00 |

|      |       |     |     |     |        |        |        |      |      |
|------|-------|-----|-----|-----|--------|--------|--------|------|------|
| ATOM | 11723 | CB  | LYS | 784 | 89.433 | 74.714 | 81.242 | 0.00 | 0.00 |
| ATOM | 11724 | HB2 | LYS | 784 | 88.744 | 75.373 | 81.770 | 0.00 | 0.00 |
| ATOM | 11725 | HB3 | LYS | 784 | 90.224 | 74.319 | 81.880 | 0.00 | 0.00 |
| ATOM | 11726 | CG  | LYS | 784 | 89.943 | 75.612 | 80.122 | 0.00 | 0.00 |
| ATOM | 11727 | HG2 | LYS | 784 | 90.645 | 75.097 | 79.467 | 0.00 | 0.00 |
| ATOM | 11728 | HG3 | LYS | 784 | 89.105 | 75.866 | 79.473 | 0.00 | 0.00 |
| ATOM | 11729 | CD  | LYS | 784 | 90.635 | 76.893 | 80.571 | 0.00 | 0.00 |
| ATOM | 11730 | HD2 | LYS | 784 | 90.059 | 77.521 | 81.250 | 0.00 | 0.00 |
| ATOM | 11731 | HD3 | LYS | 784 | 91.651 | 76.748 | 80.939 | 0.00 | 0.00 |
| ATOM | 11732 | CE  | LYS | 784 | 90.833 | 77.638 | 79.219 | 0.00 | 0.00 |
| ATOM | 11733 | HE2 | LYS | 784 | 91.254 | 76.954 | 78.482 | 0.00 | 0.00 |
| ATOM | 11734 | HE3 | LYS | 784 | 89.822 | 77.888 | 78.896 | 0.00 | 0.00 |
| ATOM | 11735 | NZ  | LYS | 784 | 91.678 | 78.847 | 79.379 | 0.00 | 0.00 |
| ATOM | 11736 | HZ1 | LYS | 784 | 91.724 | 79.372 | 78.518 | 0.00 | 0.00 |
| ATOM | 11737 | HZ2 | LYS | 784 | 91.447 | 79.337 | 80.231 | 0.00 | 0.00 |
| ATOM | 11738 | HZ3 | LYS | 784 | 92.551 | 78.447 | 79.692 | 0.00 | 0.00 |
| ATOM | 11739 | C   | LYS | 784 | 88.446 | 72.532 | 81.790 | 0.00 | 0.00 |
| ATOM | 11740 | O   | LYS | 784 | 89.323 | 71.692 | 81.948 | 0.00 | 0.00 |
| ATOM | 11741 | N   | LEU | 785 | 87.268 | 72.582 | 82.467 | 0.00 | 0.00 |
| ATOM | 11742 | H   | LEU | 785 | 86.761 | 73.420 | 82.217 | 0.00 | 0.00 |
| ATOM | 11743 | CA  | LEU | 785 | 86.932 | 71.586 | 83.498 | 0.00 | 0.00 |
| ATOM | 11744 | HA  | LEU | 785 | 87.716 | 71.553 | 84.254 | 0.00 | 0.00 |
| ATOM | 11745 | CB  | LEU | 785 | 85.690 | 72.046 | 84.277 | 0.00 | 0.00 |
| ATOM | 11746 | HB2 | LEU | 785 | 85.879 | 73.079 | 84.568 | 0.00 | 0.00 |
| ATOM | 11747 | HB3 | LEU | 785 | 84.904 | 72.144 | 83.528 | 0.00 | 0.00 |
| ATOM | 11748 | CG  | LEU | 785 | 85.200 | 71.236 | 85.522 | 0.00 | 0.00 |

|      |       |      |     |     |        |        |        |      |      |
|------|-------|------|-----|-----|--------|--------|--------|------|------|
| ATOM | 11749 | HG   | LEU | 785 | 84.959 | 70.217 | 85.220 | 0.00 | 0.00 |
| ATOM | 11750 | CD1  | LEU | 785 | 86.279 | 71.075 | 86.560 | 0.00 | 0.00 |
| ATOM | 11751 | 1HD1 | LEU | 785 | 86.682 | 71.998 | 86.976 | 0.00 | 0.00 |
| ATOM | 11752 | 2HD1 | LEU | 785 | 85.790 | 70.423 | 87.285 | 0.00 | 0.00 |
| ATOM | 11753 | 3HD1 | LEU | 785 | 87.116 | 70.503 | 86.160 | 0.00 | 0.00 |
| ATOM | 11754 | CD2  | LEU | 785 | 84.109 | 72.043 | 86.128 | 0.00 | 0.00 |
| ATOM | 11755 | 1HD2 | LEU | 785 | 83.688 | 71.532 | 86.993 | 0.00 | 0.00 |
| ATOM | 11756 | 2HD2 | LEU | 785 | 84.467 | 73.024 | 86.439 | 0.00 | 0.00 |
| ATOM | 11757 | 3HD2 | LEU | 785 | 83.384 | 72.211 | 85.332 | 0.00 | 0.00 |
| ATOM | 11758 | C    | LEU | 785 | 86.685 | 70.199 | 82.862 | 0.00 | 0.00 |
| ATOM | 11759 | O    | LEU | 785 | 86.920 | 69.206 | 83.565 | 0.00 | 0.00 |
| ATOM | 11760 | N    | LEU | 786 | 86.473 | 70.189 | 81.565 | 0.00 | 0.00 |
| ATOM | 11761 | H    | LEU | 786 | 86.367 | 71.045 | 81.039 | 0.00 | 0.00 |
| ATOM | 11762 | CA   | LEU | 786 | 86.457 | 68.971 | 80.773 | 0.00 | 0.00 |
| ATOM | 11763 | HA   | LEU | 786 | 85.979 | 68.256 | 81.442 | 0.00 | 0.00 |
| ATOM | 11764 | CB   | LEU | 786 | 85.415 | 69.173 | 79.591 | 0.00 | 0.00 |
| ATOM | 11765 | HB2  | LEU | 786 | 84.525 | 69.698 | 79.938 | 0.00 | 0.00 |
| ATOM | 11766 | HB3  | LEU | 786 | 85.900 | 69.868 | 78.905 | 0.00 | 0.00 |
| ATOM | 11767 | CG   | LEU | 786 | 85.168 | 67.971 | 78.802 | 0.00 | 0.00 |
| ATOM | 11768 | HG   | LEU | 786 | 86.156 | 67.721 | 78.417 | 0.00 | 0.00 |
| ATOM | 11769 | CD1  | LEU | 786 | 84.476 | 66.917 | 79.618 | 0.00 | 0.00 |
| ATOM | 11770 | 1HD1 | LEU | 786 | 83.420 | 67.149 | 79.758 | 0.00 | 0.00 |
| ATOM | 11771 | 2HD1 | LEU | 786 | 84.386 | 65.946 | 79.131 | 0.00 | 0.00 |
| ATOM | 11772 | 3HD1 | LEU | 786 | 85.028 | 66.764 | 80.545 | 0.00 | 0.00 |
| ATOM | 11773 | CD2  | LEU | 786 | 84.168 | 68.172 | 77.676 | 0.00 | 0.00 |
| ATOM | 11774 | 1HD2 | LEU | 786 | 84.639 | 68.703 | 76.848 | 0.00 | 0.00 |



|      |       |      |     |     |        |        |        |      |      |
|------|-------|------|-----|-----|--------|--------|--------|------|------|
| ATOM | 11775 | 2HD2 | LEU | 786 | 83.873 | 67.213 | 77.250 | 0.00 | 0.00 |
| ATOM | 11776 | 3HD2 | LEU | 786 | 83.264 | 68.634 | 78.075 | 0.00 | 0.00 |
| ATOM | 11777 | C    | LEU | 786 | 87.861 | 68.562 | 80.338 | 0.00 | 0.00 |
| ATOM | 11778 | O    | LEU | 786 | 88.113 | 67.402 | 80.379 | 0.00 | 0.00 |
| ATOM | 11779 | N    | LEU | 787 | 88.807 | 69.457 | 80.269 | 0.00 | 0.00 |
| ATOM | 11780 | H    | LEU | 787 | 88.567 | 70.382 | 80.597 | 0.00 | 0.00 |
| ATOM | 11781 | CA   | LEU | 787 | 90.223 | 69.062 | 80.146 | 0.00 | 0.00 |
| ATOM | 11782 | HA   | LEU | 787 | 90.286 | 68.350 | 79.324 | 0.00 | 0.00 |
| ATOM | 11783 | CB   | LEU | 787 | 91.077 | 70.308 | 79.728 | 0.00 | 0.00 |
| ATOM | 11784 | HB2  | LEU | 787 | 90.533 | 70.812 | 78.929 | 0.00 | 0.00 |
| ATOM | 11785 | HB3  | LEU | 787 | 91.086 | 71.074 | 80.502 | 0.00 | 0.00 |
| ATOM | 11786 | CG   | LEU | 787 | 92.553 | 69.971 | 79.314 | 0.00 | 0.00 |
| ATOM | 11787 | HG   | LEU | 787 | 92.809 | 70.699 | 78.544 | 0.00 | 0.00 |
| ATOM | 11788 | CD1  | LEU | 787 | 93.456 | 69.993 | 80.544 | 0.00 | 0.00 |
| ATOM | 11789 | 1HD1 | LEU | 787 | 93.267 | 70.899 | 81.119 | 0.00 | 0.00 |
| ATOM | 11790 | 2HD1 | LEU | 787 | 93.310 | 69.152 | 81.222 | 0.00 | 0.00 |
| ATOM | 11791 | 3HD1 | LEU | 787 | 94.418 | 70.120 | 80.047 | 0.00 | 0.00 |
| ATOM | 11792 | CD2  | LEU | 787 | 92.733 | 68.695 | 78.495 | 0.00 | 0.00 |
| ATOM | 11793 | 1HD2 | LEU | 787 | 93.791 | 68.588 | 78.255 | 0.00 | 0.00 |
| ATOM | 11794 | 2HD2 | LEU | 787 | 92.511 | 67.838 | 79.130 | 0.00 | 0.00 |
| ATOM | 11795 | 3HD2 | LEU | 787 | 92.053 | 68.757 | 77.645 | 0.00 | 0.00 |
| ATOM | 11796 | C    | LEU | 787 | 90.695 | 68.373 | 81.402 | 0.00 | 0.00 |
| ATOM | 11797 | O    | LEU | 787 | 91.156 | 67.225 | 81.419 | 0.00 | 0.00 |
| ATOM | 11798 | N    | PHE | 788 | 90.631 | 69.020 | 82.562 | 0.00 | 0.00 |
| ATOM | 11799 | H    | PHE | 788 | 90.367 | 69.991 | 82.484 | 0.00 | 0.00 |
| ATOM | 11800 | CA   | PHE | 788 | 90.828 | 68.419 | 83.881 | 0.00 | 0.00 |

|      |       |      |     |     |        |        |        |      |      |
|------|-------|------|-----|-----|--------|--------|--------|------|------|
| ATOM | 11801 | HA   | PHE | 788 | 91.896 | 68.354 | 84.089 | 0.00 | 0.00 |
| ATOM | 11802 | CB   | PHE | 788 | 90.467 | 69.437 | 84.941 | 0.00 | 0.00 |
| ATOM | 11803 | HB2  | PHE | 788 | 91.257 | 70.187 | 84.907 | 0.00 | 0.00 |
| ATOM | 11804 | HB3  | PHE | 788 | 89.516 | 69.877 | 84.643 | 0.00 | 0.00 |
| ATOM | 11805 | CG   | PHE | 788 | 90.309 | 68.830 | 86.318 | 0.00 | 0.00 |
| ATOM | 11806 | CD1  | PHE | 788 | 91.429 | 68.564 | 87.091 | 0.00 | 0.00 |
| ATOM | 11807 | HD1  | PHE | 788 | 92.385 | 68.992 | 86.828 | 0.00 | 0.00 |
| ATOM | 11808 | CE1  | PHE | 788 | 91.207 | 67.926 | 88.324 | 0.00 | 0.00 |
| ATOM | 11809 | HE1  | PHE | 788 | 91.963 | 67.937 | 89.095 | 0.00 | 0.00 |
| ATOM | 11810 | CZ   | PHE | 788 | 89.966 | 67.369 | 88.647 | 0.00 | 0.00 |
| ATOM | 11811 | HZ   | PHE | 788 | 89.820 | 66.897 | 89.608 | 0.00 | 0.00 |
| ATOM | 11812 | CE2  | PHE | 788 | 88.879 | 67.612 | 87.844 | 0.00 | 0.00 |
| ATOM | 11813 | HE2  | PHE | 788 | 87.928 | 67.232 | 88.188 | 0.00 | 0.00 |
| ATOM | 11814 | CD2  | PHE | 788 | 89.004 | 68.308 | 86.631 | 0.00 | 0.00 |
| ATOM | 11815 | HD2  | PHE | 788 | 88.236 | 68.454 | 85.886 | 0.00 | 0.00 |
| ATOM | 11816 | C    | PHE | 788 | 90.225 | 67.035 | 84.081 | 0.00 | 0.00 |
| ATOM | 11817 | O    | PHE | 788 | 90.901 | 66.105 | 84.471 | 0.00 | 0.00 |
| ATOM | 11818 | N    | THR | 789 | 88.945 | 66.817 | 83.647 | 0.00 | 0.00 |
| ATOM | 11819 | H    | THR | 789 | 88.527 | 67.651 | 83.259 | 0.00 | 0.00 |
| ATOM | 11820 | CA   | THR | 789 | 88.174 | 65.609 | 83.734 | 0.00 | 0.00 |
| ATOM | 11821 | HA   | THR | 789 | 87.980 | 65.283 | 84.756 | 0.00 | 0.00 |
| ATOM | 11822 | CB   | THR | 789 | 86.785 | 65.740 | 83.137 | 0.00 | 0.00 |
| ATOM | 11823 | HB   | THR | 789 | 86.862 | 66.166 | 82.137 | 0.00 | 0.00 |
| ATOM | 11824 | CG2  | THR | 789 | 85.868 | 64.518 | 83.248 | 0.00 | 0.00 |
| ATOM | 11825 | 1HG2 | THR | 789 | 86.286 | 63.731 | 82.620 | 0.00 | 0.00 |
| ATOM | 11826 | 2HG2 | THR | 789 | 85.935 | 64.099 | 84.252 | 0.00 | 0.00 |

|      |       |      |     |     |        |        |        |      |      |
|------|-------|------|-----|-----|--------|--------|--------|------|------|
| ATOM | 11827 | 3HG2 | THR | 789 | 84.865 | 64.911 | 83.079 | 0.00 | 0.00 |
| ATOM | 11828 | OG1  | THR | 789 | 86.215 | 66.629 | 84.055 | 0.00 | 0.00 |
| ATOM | 11829 | HG1  | THR | 789 | 86.676 | 67.465 | 83.958 | 0.00 | 0.00 |
| ATOM | 11830 | C    | THR | 789 | 88.888 | 64.433 | 82.944 | 0.00 | 0.00 |
| ATOM | 11831 | O    | THR | 789 | 88.859 | 63.260 | 83.374 | 0.00 | 0.00 |
| ATOM | 11832 | N    | ALA | 790 | 89.531 | 64.671 | 81.802 | 0.00 | 0.00 |
| ATOM | 11833 | H    | ALA | 790 | 89.532 | 65.628 | 81.480 | 0.00 | 0.00 |
| ATOM | 11834 | CA   | ALA | 790 | 90.288 | 63.712 | 80.920 | 0.00 | 0.00 |
| ATOM | 11835 | HA   | ALA | 790 | 89.743 | 62.770 | 80.862 | 0.00 | 0.00 |
| ATOM | 11836 | CB   | ALA | 790 | 90.431 | 64.288 | 79.484 | 0.00 | 0.00 |
| ATOM | 11837 | HB1  | ALA | 790 | 89.501 | 64.274 | 78.916 | 0.00 | 0.00 |
| ATOM | 11838 | HB2  | ALA | 790 | 90.751 | 65.329 | 79.444 | 0.00 | 0.00 |
| ATOM | 11839 | HB3  | ALA | 790 | 91.274 | 63.789 | 79.006 | 0.00 | 0.00 |
| ATOM | 11840 | C    | ALA | 790 | 91.645 | 63.293 | 81.508 | 0.00 | 0.00 |
| ATOM | 11841 | O    | ALA | 790 | 91.950 | 62.090 | 81.599 | 0.00 | 0.00 |
| ATOM | 11842 | N    | ALA | 791 | 92.372 | 64.319 | 81.945 | 0.00 | 0.00 |
| ATOM | 11843 | H    | ALA | 791 | 92.092 | 65.280 | 81.807 | 0.00 | 0.00 |
| ATOM | 11844 | CA   | ALA | 791 | 93.560 | 64.217 | 82.797 | 0.00 | 0.00 |
| ATOM | 11845 | HA   | ALA | 791 | 94.355 | 63.727 | 82.235 | 0.00 | 0.00 |
| ATOM | 11846 | CB   | ALA | 791 | 94.076 | 65.606 | 83.075 | 0.00 | 0.00 |
| ATOM | 11847 | HB1  | ALA | 791 | 93.328 | 66.181 | 83.621 | 0.00 | 0.00 |
| ATOM | 11848 | HB2  | ALA | 791 | 94.962 | 65.579 | 83.709 | 0.00 | 0.00 |
| ATOM | 11849 | HB3  | ALA | 791 | 94.451 | 65.999 | 82.130 | 0.00 | 0.00 |
| ATOM | 11850 | C    | ALA | 791 | 93.184 | 63.387 | 84.011 | 0.00 | 0.00 |
| ATOM | 11851 | O    | ALA | 791 | 94.047 | 62.561 | 84.347 | 0.00 | 0.00 |
| ATOM | 11852 | N    | LEU | 792 | 91.975 | 63.540 | 84.634 | 0.00 | 0.00 |

|      |       |      |     |     |        |        |        |      |      |
|------|-------|------|-----|-----|--------|--------|--------|------|------|
| ATOM | 11853 | H    | LEU | 792 | 91.397 | 64.306 | 84.320 | 0.00 | 0.00 |
| ATOM | 11854 | CA   | LEU | 792 | 91.694 | 62.706 | 85.812 | 0.00 | 0.00 |
| ATOM | 11855 | HA   | LEU | 792 | 92.518 | 62.808 | 86.518 | 0.00 | 0.00 |
| ATOM | 11856 | CB   | LEU | 792 | 90.445 | 63.311 | 86.548 | 0.00 | 0.00 |
| ATOM | 11857 | HB2  | LEU | 792 | 90.541 | 64.396 | 86.596 | 0.00 | 0.00 |
| ATOM | 11858 | HB3  | LEU | 792 | 89.573 | 63.080 | 85.937 | 0.00 | 0.00 |
| ATOM | 11859 | CG   | LEU | 792 | 90.046 | 62.879 | 87.985 | 0.00 | 0.00 |
| ATOM | 11860 | HG   | LEU | 792 | 89.731 | 61.837 | 88.036 | 0.00 | 0.00 |
| ATOM | 11861 | CD1  | LEU | 792 | 91.219 | 62.967 | 88.997 | 0.00 | 0.00 |
| ATOM | 11862 | 1HD1 | LEU | 792 | 91.414 | 64.016 | 89.221 | 0.00 | 0.00 |
| ATOM | 11863 | 2HD1 | LEU | 792 | 90.813 | 62.509 | 89.899 | 0.00 | 0.00 |
| ATOM | 11864 | 3HD1 | LEU | 792 | 92.075 | 62.420 | 88.603 | 0.00 | 0.00 |
| ATOM | 11865 | CD2  | LEU | 792 | 88.833 | 63.679 | 88.515 | 0.00 | 0.00 |
| ATOM | 11866 | 1HD2 | LEU | 792 | 88.730 | 63.377 | 89.557 | 0.00 | 0.00 |
| ATOM | 11867 | 2HD2 | LEU | 792 | 89.070 | 64.740 | 88.433 | 0.00 | 0.00 |
| ATOM | 11868 | 3HD2 | LEU | 792 | 87.903 | 63.483 | 87.982 | 0.00 | 0.00 |
| ATOM | 11869 | C    | LEU | 792 | 91.465 | 61.238 | 85.546 | 0.00 | 0.00 |
| ATOM | 11870 | O    | LEU | 792 | 91.634 | 60.458 | 86.535 | 0.00 | 0.00 |
| ATOM | 11871 | N    | VAL | 793 | 91.062 | 60.874 | 84.356 | 0.00 | 0.00 |
| ATOM | 11872 | H    | VAL | 793 | 90.866 | 61.619 | 83.702 | 0.00 | 0.00 |
| ATOM | 11873 | CA   | VAL | 793 | 91.056 | 59.440 | 83.928 | 0.00 | 0.00 |
| ATOM | 11874 | HA   | VAL | 793 | 90.924 | 58.906 | 84.869 | 0.00 | 0.00 |
| ATOM | 11875 | CB   | VAL | 793 | 89.815 | 59.110 | 82.971 | 0.00 | 0.00 |
| ATOM | 11876 | HB   | VAL | 793 | 88.987 | 59.516 | 83.551 | 0.00 | 0.00 |
| ATOM | 11877 | CG1  | VAL | 793 | 89.898 | 59.877 | 81.692 | 0.00 | 0.00 |
| ATOM | 11878 | 1HG1 | VAL | 793 | 88.972 | 59.680 | 81.153 | 0.00 | 0.00 |

|      |       |      |     |     |        |        |        |      |      |
|------|-------|------|-----|-----|--------|--------|--------|------|------|
| ATOM | 11879 | 2HG1 | VAL | 793 | 89.841 | 60.954 | 81.854 | 0.00 | 0.00 |
| ATOM | 11880 | 3HG1 | VAL | 793 | 90.749 | 59.665 | 81.046 | 0.00 | 0.00 |
| ATOM | 11881 | CG2  | VAL | 793 | 89.541 | 57.657 | 82.748 | 0.00 | 0.00 |
| ATOM | 11882 | 1HG2 | VAL | 793 | 90.431 | 57.333 | 82.207 | 0.00 | 0.00 |
| ATOM | 11883 | 2HG2 | VAL | 793 | 89.575 | 57.151 | 83.713 | 0.00 | 0.00 |
| ATOM | 11884 | 3HG2 | VAL | 793 | 88.660 | 57.381 | 82.168 | 0.00 | 0.00 |
| ATOM | 11885 | C    | VAL | 793 | 92.400 | 58.987 | 83.358 | 0.00 | 0.00 |
| ATOM | 11886 | O    | VAL | 793 | 92.852 | 57.901 | 83.720 | 0.00 | 0.00 |
| ATOM | 11887 | N    | ALA | 794 | 93.191 | 59.813 | 82.698 | 0.00 | 0.00 |
| ATOM | 11888 | H    | ALA | 794 | 92.831 | 60.735 | 82.496 | 0.00 | 0.00 |
| ATOM | 11889 | CA   | ALA | 794 | 94.647 | 59.520 | 82.454 | 0.00 | 0.00 |
| ATOM | 11890 | HA   | ALA | 794 | 94.742 | 58.614 | 81.856 | 0.00 | 0.00 |
| ATOM | 11891 | CB   | ALA | 794 | 95.279 | 60.598 | 81.708 | 0.00 | 0.00 |
| ATOM | 11892 | HB1  | ALA | 794 | 95.227 | 61.474 | 82.354 | 0.00 | 0.00 |
| ATOM | 11893 | HB2  | ALA | 794 | 96.305 | 60.357 | 81.430 | 0.00 | 0.00 |
| ATOM | 11894 | HB3  | ALA | 794 | 94.675 | 60.854 | 80.837 | 0.00 | 0.00 |
| ATOM | 11895 | C    | ALA | 794 | 95.380 | 59.322 | 83.797 | 0.00 | 0.00 |
| ATOM | 11896 | O    | ALA | 794 | 96.202 | 58.386 | 83.923 | 0.00 | 0.00 |
| ATOM | 11897 | N    | GLU | 795 | 94.999 | 60.021 | 84.857 | 0.00 | 0.00 |
| ATOM | 11898 | H    | GLU | 795 | 94.440 | 60.819 | 84.590 | 0.00 | 0.00 |
| ATOM | 11899 | CA   | GLU | 795 | 95.813 | 59.951 | 86.159 | 0.00 | 0.00 |
| ATOM | 11900 | HA   | GLU | 795 | 96.853 | 59.905 | 85.835 | 0.00 | 0.00 |
| ATOM | 11901 | CB   | GLU | 795 | 95.587 | 61.246 | 86.966 | 0.00 | 0.00 |
| ATOM | 11902 | HB2  | GLU | 795 | 95.634 | 61.995 | 86.175 | 0.00 | 0.00 |
| ATOM | 11903 | HB3  | GLU | 795 | 94.649 | 61.183 | 87.517 | 0.00 | 0.00 |
| ATOM | 11904 | CG   | GLU | 795 | 96.680 | 61.384 | 87.995 | 0.00 | 0.00 |

|      |       |      |     |     |        |        |        |      |      |
|------|-------|------|-----|-----|--------|--------|--------|------|------|
| ATOM | 11905 | HG2  | GLU | 795 | 96.735 | 60.456 | 88.564 | 0.00 | 0.00 |
| ATOM | 11906 | HG3  | GLU | 795 | 97.590 | 61.525 | 87.411 | 0.00 | 0.00 |
| ATOM | 11907 | CD   | GLU | 795 | 96.471 | 62.616 | 88.876 | 0.00 | 0.00 |
| ATOM | 11908 | OE1  | GLU | 795 | 96.040 | 62.543 | 90.036 | 0.00 | 0.00 |
| ATOM | 11909 | OE2  | GLU | 795 | 96.766 | 63.748 | 88.402 | 0.00 | 0.00 |
| ATOM | 11910 | C    | GLU | 795 | 95.495 | 58.619 | 86.888 | 0.00 | 0.00 |
| ATOM | 11911 | O    | GLU | 795 | 96.406 | 57.979 | 87.433 | 0.00 | 0.00 |
| ATOM | 11912 | N    | ARG | 796 | 94.200 | 58.225 | 86.838 | 0.00 | 0.00 |
| ATOM | 11913 | H    | ARG | 796 | 93.662 | 58.946 | 86.378 | 0.00 | 0.00 |
| ATOM | 11914 | CA   | ARG | 796 | 93.617 | 57.030 | 87.438 | 0.00 | 0.00 |
| ATOM | 11915 | HA   | ARG | 796 | 93.788 | 56.915 | 88.508 | 0.00 | 0.00 |
| ATOM | 11916 | CB   | ARG | 796 | 92.097 | 57.171 | 87.339 | 0.00 | 0.00 |
| ATOM | 11917 | HB2  | ARG | 796 | 91.865 | 58.140 | 87.783 | 0.00 | 0.00 |
| ATOM | 11918 | HB3  | ARG | 796 | 91.803 | 57.226 | 86.291 | 0.00 | 0.00 |
| ATOM | 11919 | CG   | ARG | 796 | 91.263 | 56.154 | 88.158 | 0.00 | 0.00 |
| ATOM | 11920 | HG2  | ARG | 796 | 91.481 | 55.198 | 87.683 | 0.00 | 0.00 |
| ATOM | 11921 | HG3  | ARG | 796 | 91.493 | 56.166 | 89.223 | 0.00 | 0.00 |
| ATOM | 11922 | CD   | ARG | 796 | 89.762 | 56.509 | 88.041 | 0.00 | 0.00 |
| ATOM | 11923 | HD2  | ARG | 796 | 89.587 | 57.292 | 88.779 | 0.00 | 0.00 |
| ATOM | 11924 | HD3  | ARG | 796 | 89.611 | 56.934 | 87.049 | 0.00 | 0.00 |
| ATOM | 11925 | NE   | ARG | 796 | 88.771 | 55.425 | 88.232 | 0.00 | 0.00 |
| ATOM | 11926 | HE   | ARG | 796 | 88.441 | 54.961 | 87.398 | 0.00 | 0.00 |
| ATOM | 11927 | CZ   | ARG | 796 | 88.201 | 55.078 | 89.351 | 0.00 | 0.00 |
| ATOM | 11928 | NH1  | ARG | 796 | 88.541 | 55.443 | 90.551 | 0.00 | 0.00 |
| ATOM | 11929 | 1HH1 | ARG | 796 | 87.994 | 55.134 | 91.342 | 0.00 | 0.00 |
| ATOM | 11930 | 2HH1 | ARG | 796 | 89.390 | 55.983 | 90.641 | 0.00 | 0.00 |

ATOM 11931 NH2 ARG 796 87.242 54.164 89.375 0.00 0.00  
ATOM 11932 1HH2 ARG 796 86.733 53.973 90.227 0.00 0.00  
ATOM 11933 2HH2 ARG 796 87.132 53.613 88.536 0.00 0.00  
ATOM 11934 C ARG 796 94.013 55.707 86.702 0.00 0.00  
ATOM 11935 O ARG 796 94.365 54.740 87.270 0.00 0.00  
ATOM 11936 N ARG 797 94.065 55.778 85.345 0.00 0.00  
ATOM 11937 H ARG 797 93.870 56.669 84.911 0.00 0.00  
ATOM 11938 CA ARG 797 94.640 54.758 84.460 0.00 0.00  
ATOM 11939 HA ARG 797 94.169 53.780 84.558 0.00 0.00  
ATOM 11940 CB ARG 797 94.408 55.112 83.022 0.00 0.00  
ATOM 11941 HB2 ARG 797 94.722 56.130 82.790 0.00 0.00  
ATOM 11942 HB3 ARG 797 95.064 54.495 82.409 0.00 0.00  
ATOM 11943 CG ARG 797 92.938 54.985 82.618 0.00 0.00  
ATOM 11944 HG2 ARG 797 92.639 53.957 82.826 0.00 0.00  
ATOM 11945 HG3 ARG 797 92.308 55.530 83.321 0.00 0.00  
ATOM 11946 CD ARG 797 92.578 55.237 81.120 0.00 0.00  
ATOM 11947 HD2 ARG 797 92.497 56.295 80.870 0.00 0.00  
ATOM 11948 HD3 ARG 797 93.319 54.764 80.475 0.00 0.00  
ATOM 11949 NE ARG 797 91.215 54.789 80.799 0.00 0.00  
ATOM 11950 HE ARG 797 90.702 54.353 81.552 0.00 0.00  
ATOM 11951 CZ ARG 797 90.461 55.318 79.863 0.00 0.00  
ATOM 11952 NH1 ARG 797 89.194 55.037 79.823 0.00 0.00  
ATOM 11953 1HH1 ARG 797 88.588 55.367 79.085 0.00 0.00  
ATOM 11954 2HH1 ARG 797 88.758 54.521 80.574 0.00 0.00  
ATOM 11955 NH2 ARG 797 90.938 56.098 78.899 0.00 0.00  
ATOM 11956 1HH2 ARG 797 90.346 56.407 78.141 0.00 0.00

ATOM 11957 2HH2 ARG 797 91.946 56.114 78.958 0.00 0.00  
ATOM 11958 C ARG 797 96.093 54.464 84.789 0.00 0.00  
ATOM 11959 O ARG 797 96.448 53.270 84.968 0.00 0.00  
ATOM 11960 N LEU 798 96.889 55.528 85.031 0.00 0.00  
ATOM 11961 H LEU 798 96.422 56.409 84.872 0.00 0.00  
ATOM 11962 CA LEU 798 98.299 55.429 85.247 0.00 0.00  
ATOM 11963 HA LEU 798 98.569 54.736 84.450 0.00 0.00  
ATOM 11964 CB LEU 798 98.964 56.793 84.912 0.00 0.00  
ATOM 11965 HB2 LEU 798 98.829 57.054 83.863 0.00 0.00  
ATOM 11966 HB3 LEU 798 98.436 57.504 85.548 0.00 0.00  
ATOM 11967 CG LEU 798 100.483 56.934 85.217 0.00 0.00  
ATOM 11968 HG LEU 798 100.694 56.501 86.195 0.00 0.00  
ATOM 11969 CD1 LEU 798 101.331 56.198 84.138 0.00 0.00  
ATOM 11970 1HD1 LEU 798 102.366 56.103 84.464 0.00 0.00  
ATOM 11971 2HD1 LEU 798 101.045 55.168 83.925 0.00 0.00  
ATOM 11972 3HD1 LEU 798 101.214 56.736 83.197 0.00 0.00  
ATOM 11973 CD2 LEU 798 100.956 58.315 85.110 0.00 0.00  
ATOM 11974 1HD2 LEU 798 101.958 58.404 85.531 0.00 0.00  
ATOM 11975 2HD2 LEU 798 100.945 58.621 84.063 0.00 0.00  
ATOM 11976 3HD2 LEU 798 100.246 58.939 85.652 0.00 0.00  
ATOM 11977 C LEU 798 98.632 54.870 86.684 0.00 0.00  
ATOM 11978 O LEU 798 99.491 53.977 86.818 0.00 0.00  
ATOM 11979 N ALA 799 97.890 55.384 87.741 0.00 0.00  
ATOM 11980 H ALA 799 97.235 56.130 87.554 0.00 0.00  
ATOM 11981 CA ALA 799 97.950 54.863 89.140 0.00 0.00  
ATOM 11982 HA ALA 799 98.910 55.048 89.621 0.00 0.00



|      |       |      |     |     |        |        |        |      |      |
|------|-------|------|-----|-----|--------|--------|--------|------|------|
| ATOM | 11983 | CB   | ALA | 799 | 96.997 | 55.783 | 89.884 | 0.00 | 0.00 |
| ATOM | 11984 | HB1  | ALA | 799 | 97.390 | 56.799 | 89.913 | 0.00 | 0.00 |
| ATOM | 11985 | HB2  | ALA | 799 | 96.040 | 55.913 | 89.379 | 0.00 | 0.00 |
| ATOM | 11986 | HB3  | ALA | 799 | 96.897 | 55.426 | 90.909 | 0.00 | 0.00 |
| ATOM | 11987 | C    | ALA | 799 | 97.608 | 53.405 | 89.339 | 0.00 | 0.00 |
| ATOM | 11988 | O    | ALA | 799 | 98.223 | 52.733 | 90.172 | 0.00 | 0.00 |
| ATOM | 11989 | N    | ARG | 800 | 96.624 | 52.929 | 88.513 | 0.00 | 0.00 |
| ATOM | 11990 | H    | ARG | 800 | 96.197 | 53.627 | 87.922 | 0.00 | 0.00 |
| ATOM | 11991 | CA   | ARG | 800 | 96.161 | 51.535 | 88.495 | 0.00 | 0.00 |
| ATOM | 11992 | HA   | ARG | 800 | 95.990 | 51.182 | 89.512 | 0.00 | 0.00 |
| ATOM | 11993 | CB   | ARG | 800 | 94.831 | 51.353 | 87.689 | 0.00 | 0.00 |
| ATOM | 11994 | HB2  | ARG | 800 | 94.191 | 52.125 | 88.116 | 0.00 | 0.00 |
| ATOM | 11995 | HB3  | ARG | 800 | 95.096 | 51.485 | 86.640 | 0.00 | 0.00 |
| ATOM | 11996 | CG   | ARG | 800 | 94.224 | 49.901 | 87.842 | 0.00 | 0.00 |
| ATOM | 11997 | HG2  | ARG | 800 | 94.311 | 49.518 | 88.859 | 0.00 | 0.00 |
| ATOM | 11998 | HG3  | ARG | 800 | 94.870 | 49.370 | 87.143 | 0.00 | 0.00 |
| ATOM | 11999 | CD   | ARG | 800 | 92.741 | 49.799 | 87.381 | 0.00 | 0.00 |
| ATOM | 12000 | HD2  | ARG | 800 | 92.496 | 48.747 | 87.528 | 0.00 | 0.00 |
| ATOM | 12001 | HD3  | ARG | 800 | 92.162 | 50.391 | 88.089 | 0.00 | 0.00 |
| ATOM | 12002 | NE   | ARG | 800 | 92.586 | 50.275 | 85.983 | 0.00 | 0.00 |
| ATOM | 12003 | HE   | ARG | 800 | 93.207 | 49.884 | 85.289 | 0.00 | 0.00 |
| ATOM | 12004 | CZ   | ARG | 800 | 91.766 | 51.203 | 85.488 | 0.00 | 0.00 |
| ATOM | 12005 | NH1  | ARG | 800 | 91.192 | 51.969 | 86.299 | 0.00 | 0.00 |
| ATOM | 12006 | 1HH1 | ARG | 800 | 90.881 | 52.864 | 85.949 | 0.00 | 0.00 |
| ATOM | 12007 | 2HH1 | ARG | 800 | 91.083 | 51.740 | 87.276 | 0.00 | 0.00 |
| ATOM | 12008 | NH2  | ARG | 800 | 91.615 | 51.417 | 84.169 | 0.00 | 0.00 |

|      |       |      |     |     |         |        |        |      |      |
|------|-------|------|-----|-----|---------|--------|--------|------|------|
| ATOM | 12009 | 1HH2 | ARG | 800 | 90.908  | 52.086 | 83.901 | 0.00 | 0.00 |
| ATOM | 12010 | 2HH2 | ARG | 800 | 91.891  | 50.660 | 83.560 | 0.00 | 0.00 |
| ATOM | 12011 | C    | ARG | 800 | 97.220  | 50.573 | 87.880 | 0.00 | 0.00 |
| ATOM | 12012 | O    | ARG | 800 | 97.292  | 49.393 | 88.285 | 0.00 | 0.00 |
| ATOM | 12013 | N    | GLY | 801 | 97.972  | 51.075 | 86.903 | 0.00 | 0.00 |
| ATOM | 12014 | H    | GLY | 801 | 97.758  | 52.017 | 86.605 | 0.00 | 0.00 |
| ATOM | 12015 | CA   | GLY | 801 | 99.037  | 50.312 | 86.224 | 0.00 | 0.00 |
| ATOM | 12016 | HA2  | GLY | 801 | 99.983  | 50.362 | 86.763 | 0.00 | 0.00 |
| ATOM | 12017 | HA3  | GLY | 801 | 98.738  | 49.268 | 86.316 | 0.00 | 0.00 |
| ATOM | 12018 | C    | GLY | 801 | 99.332  | 50.464 | 84.728 | 0.00 | 0.00 |
| ATOM | 12019 | O    | GLY | 801 | 100.473 | 50.251 | 84.293 | 0.00 | 0.00 |
| ATOM | 12020 | N    | LEU | 802 | 98.358  | 50.984 | 83.950 | 0.00 | 0.00 |
| ATOM | 12021 | H    | LEU | 802 | 97.536  | 51.196 | 84.497 | 0.00 | 0.00 |
| ATOM | 12022 | CA   | LEU | 802 | 98.292  | 51.154 | 82.537 | 0.00 | 0.00 |
| ATOM | 12023 | HA   | LEU | 802 | 98.490  | 50.209 | 82.031 | 0.00 | 0.00 |
| ATOM | 12024 | CB   | LEU | 802 | 96.929  | 51.604 | 81.997 | 0.00 | 0.00 |
| ATOM | 12025 | HB2  | LEU | 802 | 96.572  | 52.420 | 82.625 | 0.00 | 0.00 |
| ATOM | 12026 | HB3  | LEU | 802 | 96.976  | 51.842 | 80.934 | 0.00 | 0.00 |
| ATOM | 12027 | CG   | LEU | 802 | 95.936  | 50.416 | 82.141 | 0.00 | 0.00 |
| ATOM | 12028 | HG   | LEU | 802 | 96.458  | 49.496 | 81.877 | 0.00 | 0.00 |
| ATOM | 12029 | CD1  | LEU | 802 | 95.260  | 50.209 | 83.557 | 0.00 | 0.00 |
| ATOM | 12030 | 1HD1 | LEU | 802 | 96.077  | 50.002 | 84.248 | 0.00 | 0.00 |
| ATOM | 12031 | 2HD1 | LEU | 802 | 94.625  | 51.064 | 83.788 | 0.00 | 0.00 |
| ATOM | 12032 | 3HD1 | LEU | 802 | 94.589  | 49.371 | 83.364 | 0.00 | 0.00 |
| ATOM | 12033 | CD2  | LEU | 802 | 94.743  | 50.671 | 81.188 | 0.00 | 0.00 |
| ATOM | 12034 | 1HD2 | LEU | 802 | 95.147  | 50.314 | 80.241 | 0.00 | 0.00 |

ATOM 12035 2HD2 LEU 802 93.921 50.006 81.451 0.00 0.00  
ATOM 12036 3HD2 LEU 802 94.443 51.717 81.254 0.00 0.00  
ATOM 12037 C LEU 802 99.379 52.144 82.187 0.00 0.00  
ATOM 12038 O LEU 802 99.548 53.144 82.858 0.00 0.00  
ATOM 12039 N LYS 803 99.891 52.037 80.959 0.00 0.00  
ATOM 12040 H LYS 803 99.516 51.310 80.366 0.00 0.00  
ATOM 12041 CA LYS 803 100.767 52.972 80.292 0.00 0.00  
ATOM 12042 HA LYS 803 101.212 53.579 81.080 0.00 0.00  
ATOM 12043 CB LYS 803 101.871 52.251 79.538 0.00 0.00  
ATOM 12044 HB2 LYS 803 101.508 51.586 78.754 0.00 0.00  
ATOM 12045 HB3 LYS 803 102.548 52.952 79.049 0.00 0.00  
ATOM 12046 CG LYS 803 102.766 51.478 80.555 0.00 0.00  
ATOM 12047 HG2 LYS 803 103.301 52.140 81.237 0.00 0.00  
ATOM 12048 HG3 LYS 803 102.103 50.887 81.187 0.00 0.00  
ATOM 12049 CD LYS 803 103.721 50.438 79.932 0.00 0.00  
ATOM 12050 HD2 LYS 803 104.412 50.069 80.690 0.00 0.00  
ATOM 12051 HD3 LYS 803 103.178 49.581 79.532 0.00 0.00  
ATOM 12052 CE LYS 803 104.701 51.106 78.916 0.00 0.00  
ATOM 12053 HE2 LYS 803 104.101 51.704 78.230 0.00 0.00  
ATOM 12054 HE3 LYS 803 105.308 51.801 79.495 0.00 0.00  
ATOM 12055 NZ LYS 803 105.563 50.148 78.245 0.00 0.00  
ATOM 12056 HZ1 LYS 803 106.279 49.676 78.779 0.00 0.00  
ATOM 12057 HZ2 LYS 803 104.989 49.468 77.769 0.00 0.00  
ATOM 12058 HZ3 LYS 803 106.028 50.547 77.442 0.00 0.00  
ATOM 12059 C LYS 803 99.932 53.775 79.269 0.00 0.00  
ATOM 12060 O LYS 803 99.167 53.202 78.470 0.00 0.00

|      |       |      |     |     |         |        |        |      |      |
|------|-------|------|-----|-----|---------|--------|--------|------|------|
| ATOM | 12061 | N    | LEU | 804 | 99.968  | 55.081 | 79.352 | 0.00 | 0.00 |
| ATOM | 12062 | H    | LEU | 804 | 100.677 | 55.391 | 80.000 | 0.00 | 0.00 |
| ATOM | 12063 | CA   | LEU | 804 | 98.989  | 55.977 | 78.709 | 0.00 | 0.00 |
| ATOM | 12064 | HA   | LEU | 804 | 97.991  | 55.594 | 78.922 | 0.00 | 0.00 |
| ATOM | 12065 | CB   | LEU | 804 | 98.971  | 57.266 | 79.387 | 0.00 | 0.00 |
| ATOM | 12066 | HB2  | LEU | 804 | 99.966  | 57.712 | 79.358 | 0.00 | 0.00 |
| ATOM | 12067 | HB3  | LEU | 804 | 98.149  | 57.847 | 78.970 | 0.00 | 0.00 |
| ATOM | 12068 | CG   | LEU | 804 | 98.689  | 57.274 | 80.894 | 0.00 | 0.00 |
| ATOM | 12069 | HG   | LEU | 804 | 99.441  | 56.672 | 81.404 | 0.00 | 0.00 |
| ATOM | 12070 | CD1  | LEU | 804 | 98.798  | 58.663 | 81.407 | 0.00 | 0.00 |
| ATOM | 12071 | 1HD1 | LEU | 804 | 98.334  | 59.325 | 80.676 | 0.00 | 0.00 |
| ATOM | 12072 | 2HD1 | LEU | 804 | 98.290  | 58.751 | 82.367 | 0.00 | 0.00 |
| ATOM | 12073 | 3HD1 | LEU | 804 | 99.872  | 58.839 | 81.473 | 0.00 | 0.00 |
| ATOM | 12074 | CD2  | LEU | 804 | 97.352  | 56.683 | 81.310 | 0.00 | 0.00 |
| ATOM | 12075 | 1HD2 | LEU | 804 | 97.267  | 56.663 | 82.397 | 0.00 | 0.00 |
| ATOM | 12076 | 2HD2 | LEU | 804 | 96.555  | 57.304 | 80.901 | 0.00 | 0.00 |
| ATOM | 12077 | 3HD2 | LEU | 804 | 97.282  | 55.666 | 80.923 | 0.00 | 0.00 |
| ATOM | 12078 | C    | LEU | 804 | 99.141  | 56.066 | 77.172 | 0.00 | 0.00 |
| ATOM | 12079 | O    | LEU | 804 | 100.274 | 56.049 | 76.649 | 0.00 | 0.00 |
| ATOM | 12080 | N    | ASN | 805 | 97.934  | 56.093 | 76.456 | 0.00 | 0.00 |
| ATOM | 12081 | H    | ASN | 805 | 97.145  | 56.296 | 77.053 | 0.00 | 0.00 |
| ATOM | 12082 | CA   | ASN | 805 | 97.817  | 56.437 | 75.034 | 0.00 | 0.00 |
| ATOM | 12083 | HA   | ASN | 805 | 98.623  | 55.954 | 74.481 | 0.00 | 0.00 |
| ATOM | 12084 | CB   | ASN | 805 | 96.522  | 55.703 | 74.574 | 0.00 | 0.00 |
| ATOM | 12085 | HB2  | ASN | 805 | 96.629  | 55.545 | 73.501 | 0.00 | 0.00 |
| ATOM | 12086 | HB3  | ASN | 805 | 96.467  | 54.718 | 75.038 | 0.00 | 0.00 |

|      |       |      |     |     |         |        |        |      |      |
|------|-------|------|-----|-----|---------|--------|--------|------|------|
| ATOM | 12087 | CG   | ASN | 805 | 95.223  | 56.373 | 74.919 | 0.00 | 0.00 |
| ATOM | 12088 | OD1  | ASN | 805 | 95.222  | 57.557 | 75.190 | 0.00 | 0.00 |
| ATOM | 12089 | ND2  | ASN | 805 | 94.138  | 55.638 | 74.866 | 0.00 | 0.00 |
| ATOM | 12090 | 1HD2 | ASN | 805 | 93.305  | 56.200 | 74.969 | 0.00 | 0.00 |
| ATOM | 12091 | 2HD2 | ASN | 805 | 94.212  | 54.739 | 74.411 | 0.00 | 0.00 |
| ATOM | 12092 | C    | ASN | 805 | 98.011  | 57.936 | 74.740 | 0.00 | 0.00 |
| ATOM | 12093 | O    | ASN | 805 | 98.348  | 58.655 | 75.640 | 0.00 | 0.00 |
| ATOM | 12094 | N    | TYR | 806 | 97.863  | 58.333 | 73.476 | 0.00 | 0.00 |
| ATOM | 12095 | H    | TYR | 806 | 97.487  | 57.709 | 72.776 | 0.00 | 0.00 |
| ATOM | 12096 | CA   | TYR | 806 | 98.257  | 59.642 | 73.088 | 0.00 | 0.00 |
| ATOM | 12097 | HA   | TYR | 806 | 99.194  | 59.862 | 73.600 | 0.00 | 0.00 |
| ATOM | 12098 | CB   | TYR | 806 | 98.387  | 59.668 | 71.568 | 0.00 | 0.00 |
| ATOM | 12099 | HB2  | TYR | 806 | 99.385  | 59.263 | 71.400 | 0.00 | 0.00 |
| ATOM | 12100 | HB3  | TYR | 806 | 97.754  | 58.913 | 71.102 | 0.00 | 0.00 |
| ATOM | 12101 | CG   | TYR | 806 | 98.314  | 61.015 | 70.871 | 0.00 | 0.00 |
| ATOM | 12102 | CD1  | TYR | 806 | 99.276  | 61.978 | 71.112 | 0.00 | 0.00 |
| ATOM | 12103 | HD1  | TYR | 806 | 100.066 | 61.723 | 71.802 | 0.00 | 0.00 |
| ATOM | 12104 | CE1  | TYR | 806 | 99.213  | 63.222 | 70.554 | 0.00 | 0.00 |
| ATOM | 12105 | HE1  | TYR | 806 | 99.995  | 63.943 | 70.740 | 0.00 | 0.00 |
| ATOM | 12106 | CZ   | TYR | 806 | 98.187  | 63.542 | 69.606 | 0.00 | 0.00 |
| ATOM | 12107 | OH   | TYR | 806 | 98.271  | 64.720 | 68.931 | 0.00 | 0.00 |
| ATOM | 12108 | HH   | TYR | 806 | 99.014  | 65.180 | 69.329 | 0.00 | 0.00 |
| ATOM | 12109 | CE2  | TYR | 806 | 97.231  | 62.602 | 69.284 | 0.00 | 0.00 |
| ATOM | 12110 | HE2  | TYR | 806 | 96.400  | 62.844 | 68.639 | 0.00 | 0.00 |
| ATOM | 12111 | CD2  | TYR | 806 | 97.278  | 61.357 | 69.961 | 0.00 | 0.00 |
| ATOM | 12112 | HD2  | TYR | 806 | 96.531  | 60.620 | 69.705 | 0.00 | 0.00 |

|      |       |     |     |     |        |        |        |      |      |
|------|-------|-----|-----|-----|--------|--------|--------|------|------|
| ATOM | 12113 | C   | TYR | 806 | 97.374 | 60.788 | 73.631 | 0.00 | 0.00 |
| ATOM | 12114 | O   | TYR | 806 | 97.937 | 61.666 | 74.216 | 0.00 | 0.00 |
| ATOM | 12115 | N   | PRO | 807 | 96.037 | 60.745 | 73.419 | 0.00 | 0.00 |
| ATOM | 12116 | CD  | PRO | 807 | 95.212 | 59.811 | 72.680 | 0.00 | 0.00 |
| ATOM | 12117 | HD2 | PRO | 807 | 95.533 | 59.930 | 71.645 | 0.00 | 0.00 |
| ATOM | 12118 | HD3 | PRO | 807 | 95.333 | 58.799 | 73.068 | 0.00 | 0.00 |
| ATOM | 12119 | CG  | PRO | 807 | 93.859 | 60.360 | 72.901 | 0.00 | 0.00 |
| ATOM | 12120 | HG2 | PRO | 807 | 93.235 | 60.248 | 72.015 | 0.00 | 0.00 |
| ATOM | 12121 | HG3 | PRO | 807 | 93.272 | 59.821 | 73.645 | 0.00 | 0.00 |
| ATOM | 12122 | CB  | PRO | 807 | 93.885 | 61.882 | 73.200 | 0.00 | 0.00 |
| ATOM | 12123 | HB2 | PRO | 807 | 93.986 | 62.481 | 72.295 | 0.00 | 0.00 |
| ATOM | 12124 | HB3 | PRO | 807 | 93.043 | 62.230 | 73.798 | 0.00 | 0.00 |
| ATOM | 12125 | CA  | PRO | 807 | 95.202 | 61.845 | 74.014 | 0.00 | 0.00 |
| ATOM | 12126 | HA  | PRO | 807 | 95.703 | 62.794 | 73.823 | 0.00 | 0.00 |
| ATOM | 12127 | C   | PRO | 807 | 95.169 | 61.749 | 75.515 | 0.00 | 0.00 |
| ATOM | 12128 | O   | PRO | 807 | 95.285 | 62.797 | 76.209 | 0.00 | 0.00 |
| ATOM | 12129 | N   | GLU | 808 | 95.223 | 60.550 | 76.072 | 0.00 | 0.00 |
| ATOM | 12130 | H   | GLU | 808 | 95.234 | 59.654 | 75.605 | 0.00 | 0.00 |
| ATOM | 12131 | CA  | GLU | 808 | 95.484 | 60.498 | 77.541 | 0.00 | 0.00 |
| ATOM | 12132 | HA  | GLU | 808 | 94.643 | 60.991 | 78.029 | 0.00 | 0.00 |
| ATOM | 12133 | CB  | GLU | 808 | 95.576 | 59.081 | 78.037 | 0.00 | 0.00 |
| ATOM | 12134 | HB2 | GLU | 808 | 96.239 | 58.533 | 77.368 | 0.00 | 0.00 |
| ATOM | 12135 | HB3 | GLU | 808 | 96.017 | 59.109 | 79.033 | 0.00 | 0.00 |
| ATOM | 12136 | CG  | GLU | 808 | 94.272 | 58.254 | 78.054 | 0.00 | 0.00 |
| ATOM | 12137 | HG2 | GLU | 808 | 93.582 | 58.588 | 78.829 | 0.00 | 0.00 |
| ATOM | 12138 | HG3 | GLU | 808 | 93.740 | 58.356 | 77.108 | 0.00 | 0.00 |

|      |       |      |     |     |         |        |        |      |      |
|------|-------|------|-----|-----|---------|--------|--------|------|------|
| ATOM | 12139 | CD   | GLU | 808 | 94.567  | 56.770 | 78.243 | 0.00 | 0.00 |
| ATOM | 12140 | OE1  | GLU | 808 | 95.703  | 56.224 | 78.235 | 0.00 | 0.00 |
| ATOM | 12141 | OE2  | GLU | 808 | 93.551  | 56.067 | 78.384 | 0.00 | 0.00 |
| ATOM | 12142 | C    | GLU | 808 | 96.708  | 61.305 | 77.984 | 0.00 | 0.00 |
| ATOM | 12143 | O    | GLU | 808 | 96.604  | 62.159 | 78.900 | 0.00 | 0.00 |
| ATOM | 12144 | N    | SER | 809 | 97.898  | 61.034 | 77.434 | 0.00 | 0.00 |
| ATOM | 12145 | H    | SER | 809 | 97.884  | 60.382 | 76.662 | 0.00 | 0.00 |
| ATOM | 12146 | CA   | SER | 809 | 99.164  | 61.619 | 77.861 | 0.00 | 0.00 |
| ATOM | 12147 | HA   | SER | 809 | 99.374  | 61.422 | 78.912 | 0.00 | 0.00 |
| ATOM | 12148 | CB   | SER | 809 | 100.356 | 61.139 | 77.043 | 0.00 | 0.00 |
| ATOM | 12149 | HB2  | SER | 809 | 100.002 | 61.436 | 76.056 | 0.00 | 0.00 |
| ATOM | 12150 | HB3  | SER | 809 | 101.287 | 61.614 | 77.350 | 0.00 | 0.00 |
| ATOM | 12151 | OG   | SER | 809 | 100.377 | 59.700 | 77.179 | 0.00 | 0.00 |
| ATOM | 12152 | HG   | SER | 809 | 99.641  | 59.334 | 76.683 | 0.00 | 0.00 |
| ATOM | 12153 | C    | SER | 809 | 99.205  | 63.182 | 77.623 | 0.00 | 0.00 |
| ATOM | 12154 | O    | SER | 809 | 99.490  | 63.859 | 78.614 | 0.00 | 0.00 |
| ATOM | 12155 | N    | VAL | 810 | 98.581  | 63.699 | 76.587 | 0.00 | 0.00 |
| ATOM | 12156 | H    | VAL | 810 | 98.147  | 63.024 | 75.974 | 0.00 | 0.00 |
| ATOM | 12157 | CA   | VAL | 810 | 98.474  | 65.097 | 76.282 | 0.00 | 0.00 |
| ATOM | 12158 | HA   | VAL | 810 | 99.457  | 65.561 | 76.364 | 0.00 | 0.00 |
| ATOM | 12159 | CB   | VAL | 810 | 97.973  | 65.424 | 74.883 | 0.00 | 0.00 |
| ATOM | 12160 | HB   | VAL | 810 | 97.033  | 64.919 | 74.663 | 0.00 | 0.00 |
| ATOM | 12161 | CG1  | VAL | 810 | 97.752  | 66.944 | 74.624 | 0.00 | 0.00 |
| ATOM | 12162 | 1HG1 | VAL | 810 | 97.428  | 67.039 | 73.587 | 0.00 | 0.00 |
| ATOM | 12163 | 2HG1 | VAL | 810 | 97.010  | 67.466 | 75.228 | 0.00 | 0.00 |
| ATOM | 12164 | 3HG1 | VAL | 810 | 98.736  | 67.365 | 74.827 | 0.00 | 0.00 |

|      |       |      |     |     |        |        |        |      |      |
|------|-------|------|-----|-----|--------|--------|--------|------|------|
| ATOM | 12165 | CG2  | VAL | 810 | 98.972 | 64.953 | 73.793 | 0.00 | 0.00 |
| ATOM | 12166 | 1HG2 | VAL | 810 | 99.244 | 63.938 | 74.081 | 0.00 | 0.00 |
| ATOM | 12167 | 2HG2 | VAL | 810 | 98.422 | 64.830 | 72.860 | 0.00 | 0.00 |
| ATOM | 12168 | 3HG2 | VAL | 810 | 99.870 | 65.563 | 73.694 | 0.00 | 0.00 |
| ATOM | 12169 | C    | VAL | 810 | 97.659 | 65.819 | 77.328 | 0.00 | 0.00 |
| ATOM | 12170 | O    | VAL | 810 | 98.055 | 66.869 | 77.812 | 0.00 | 0.00 |
| ATOM | 12171 | N    | ALA | 811 | 96.586 | 65.200 | 77.812 | 0.00 | 0.00 |
| ATOM | 12172 | H    | ALA | 811 | 96.444 | 64.227 | 77.581 | 0.00 | 0.00 |
| ATOM | 12173 | CA   | ALA | 811 | 95.564 | 65.868 | 78.571 | 0.00 | 0.00 |
| ATOM | 12174 | HA   | ALA | 811 | 95.476 | 66.900 | 78.231 | 0.00 | 0.00 |
| ATOM | 12175 | CB   | ALA | 811 | 94.172 | 65.241 | 78.452 | 0.00 | 0.00 |
| ATOM | 12176 | HB1  | ALA | 811 | 93.763 | 65.562 | 77.494 | 0.00 | 0.00 |
| ATOM | 12177 | HB2  | ALA | 811 | 94.220 | 64.152 | 78.478 | 0.00 | 0.00 |
| ATOM | 12178 | HB3  | ALA | 811 | 93.622 | 65.648 | 79.300 | 0.00 | 0.00 |
| ATOM | 12179 | C    | ALA | 811 | 96.102 | 65.891 | 79.993 | 0.00 | 0.00 |
| ATOM | 12180 | O    | ALA | 811 | 96.227 | 66.958 | 80.612 | 0.00 | 0.00 |
| ATOM | 12181 | N    | LEU | 812 | 96.557 | 64.680 | 80.499 | 0.00 | 0.00 |
| ATOM | 12182 | H    | LEU | 812 | 96.621 | 63.893 | 79.869 | 0.00 | 0.00 |
| ATOM | 12183 | CA   | LEU | 812 | 97.270 | 64.589 | 81.773 | 0.00 | 0.00 |
| ATOM | 12184 | HA   | LEU | 812 | 96.580 | 64.658 | 82.614 | 0.00 | 0.00 |
| ATOM | 12185 | CB   | LEU | 812 | 97.843 | 63.239 | 81.853 | 0.00 | 0.00 |
| ATOM | 12186 | HB2  | LEU | 812 | 96.881 | 62.733 | 81.780 | 0.00 | 0.00 |
| ATOM | 12187 | HB3  | LEU | 812 | 98.438 | 62.951 | 80.986 | 0.00 | 0.00 |
| ATOM | 12188 | CG   | LEU | 812 | 98.493 | 62.931 | 83.207 | 0.00 | 0.00 |
| ATOM | 12189 | HG   | LEU | 812 | 99.180 | 63.748 | 83.428 | 0.00 | 0.00 |
| ATOM | 12190 | CD1  | LEU | 812 | 97.465 | 62.831 | 84.317 | 0.00 | 0.00 |



|      |       |      |     |     |         |        |        |      |      |
|------|-------|------|-----|-----|---------|--------|--------|------|------|
| ATOM | 12191 | 1HD1 | LEU | 812 | 97.116  | 63.839 | 84.542 | 0.00 | 0.00 |
| ATOM | 12192 | 2HD1 | LEU | 812 | 96.629  | 62.203 | 84.010 | 0.00 | 0.00 |
| ATOM | 12193 | 3HD1 | LEU | 812 | 97.959  | 62.548 | 85.246 | 0.00 | 0.00 |
| ATOM | 12194 | CD2  | LEU | 812 | 99.160  | 61.544 | 83.155 | 0.00 | 0.00 |
| ATOM | 12195 | 1HD2 | LEU | 812 | 99.748  | 61.493 | 82.238 | 0.00 | 0.00 |
| ATOM | 12196 | 2HD2 | LEU | 812 | 99.763  | 61.509 | 84.062 | 0.00 | 0.00 |
| ATOM | 12197 | 3HD2 | LEU | 812 | 98.361  | 60.814 | 83.026 | 0.00 | 0.00 |
| ATOM | 12198 | C    | LEU | 812 | 98.370  | 65.698 | 81.968 | 0.00 | 0.00 |
| ATOM | 12199 | O    | LEU | 812 | 98.288  | 66.415 | 82.961 | 0.00 | 0.00 |
| ATOM | 12200 | N    | ILE | 813 | 99.308  | 65.911 | 80.992 | 0.00 | 0.00 |
| ATOM | 12201 | H    | ILE | 813 | 99.250  | 65.356 | 80.151 | 0.00 | 0.00 |
| ATOM | 12202 | CA   | ILE | 813 | 100.410 | 66.849 | 81.137 | 0.00 | 0.00 |
| ATOM | 12203 | HA   | ILE | 813 | 100.741 | 66.864 | 82.175 | 0.00 | 0.00 |
| ATOM | 12204 | CB   | ILE | 813 | 101.632 | 66.486 | 80.239 | 0.00 | 0.00 |
| ATOM | 12205 | HB   | ILE | 813 | 102.371 | 67.192 | 80.618 | 0.00 | 0.00 |
| ATOM | 12206 | CG2  | ILE | 813 | 102.145 | 65.109 | 80.651 | 0.00 | 0.00 |
| ATOM | 12207 | 1HG2 | ILE | 813 | 101.389 | 64.364 | 80.401 | 0.00 | 0.00 |
| ATOM | 12208 | 2HG2 | ILE | 813 | 103.117 | 64.958 | 80.180 | 0.00 | 0.00 |
| ATOM | 12209 | 3HG2 | ILE | 813 | 102.261 | 65.051 | 81.733 | 0.00 | 0.00 |
| ATOM | 12210 | CG1  | ILE | 813 | 101.474 | 66.703 | 78.686 | 0.00 | 0.00 |
| ATOM | 12211 | 2HG1 | ILE | 813 | 100.607 | 66.072 | 78.491 | 0.00 | 0.00 |
| ATOM | 12212 | 3HG1 | ILE | 813 | 100.993 | 67.627 | 78.369 | 0.00 | 0.00 |
| ATOM | 12213 | CD1  | ILE | 813 | 102.673 | 66.390 | 77.823 | 0.00 | 0.00 |
| ATOM | 12214 | 1HD1 | ILE | 813 | 103.095 | 65.412 | 78.056 | 0.00 | 0.00 |
| ATOM | 12215 | 2HD1 | ILE | 813 | 102.438 | 66.497 | 76.764 | 0.00 | 0.00 |
| ATOM | 12216 | 3HD1 | ILE | 813 | 103.490 | 67.091 | 77.996 | 0.00 | 0.00 |

|      |       |     |     |     |         |        |        |      |      |
|------|-------|-----|-----|-----|---------|--------|--------|------|------|
| ATOM | 12217 | C   | ILE | 813 | 99.988  | 68.293 | 80.911 | 0.00 | 0.00 |
| ATOM | 12218 | O   | ILE | 813 | 100.564 | 69.137 | 81.558 | 0.00 | 0.00 |
| ATOM | 12219 | N   | SER | 814 | 98.887  | 68.589 | 80.182 | 0.00 | 0.00 |
| ATOM | 12220 | H   | SER | 814 | 98.443  | 67.864 | 79.636 | 0.00 | 0.00 |
| ATOM | 12221 | CA  | SER | 814 | 98.485  | 69.963 | 80.082 | 0.00 | 0.00 |
| ATOM | 12222 | HA  | SER | 814 | 99.391  | 70.552 | 79.939 | 0.00 | 0.00 |
| ATOM | 12223 | CB  | SER | 814 | 97.650  | 70.136 | 78.805 | 0.00 | 0.00 |
| ATOM | 12224 | HB2 | SER | 814 | 96.810  | 69.454 | 78.936 | 0.00 | 0.00 |
| ATOM | 12225 | HB3 | SER | 814 | 97.422  | 71.183 | 78.605 | 0.00 | 0.00 |
| ATOM | 12226 | OG  | SER | 814 | 98.391  | 69.651 | 77.622 | 0.00 | 0.00 |
| ATOM | 12227 | HG  | SER | 814 | 98.272  | 68.705 | 77.512 | 0.00 | 0.00 |
| ATOM | 12228 | C   | SER | 814 | 97.820  | 70.386 | 81.354 | 0.00 | 0.00 |
| ATOM | 12229 | O   | SER | 814 | 98.051  | 71.498 | 81.850 | 0.00 | 0.00 |
| ATOM | 12230 | N   | ALA | 815 | 96.999  | 69.526 | 81.918 | 0.00 | 0.00 |
| ATOM | 12231 | H   | ALA | 815 | 96.717  | 68.661 | 81.479 | 0.00 | 0.00 |
| ATOM | 12232 | CA  | ALA | 815 | 96.199  | 69.867 | 83.149 | 0.00 | 0.00 |
| ATOM | 12233 | HA  | ALA | 815 | 95.712  | 70.842 | 83.150 | 0.00 | 0.00 |
| ATOM | 12234 | CB  | ALA | 815 | 95.321  | 68.657 | 83.390 | 0.00 | 0.00 |
| ATOM | 12235 | HB1 | ALA | 815 | 94.808  | 68.269 | 82.510 | 0.00 | 0.00 |
| ATOM | 12236 | HB2 | ALA | 815 | 95.925  | 67.878 | 83.857 | 0.00 | 0.00 |
| ATOM | 12237 | HB3 | ALA | 815 | 94.564  | 68.921 | 84.129 | 0.00 | 0.00 |
| ATOM | 12238 | C   | ALA | 815 | 97.235  | 70.134 | 84.295 | 0.00 | 0.00 |
| ATOM | 12239 | O   | ALA | 815 | 96.939  | 71.035 | 85.092 | 0.00 | 0.00 |
| ATOM | 12240 | N   | PHE | 816 | 98.418  | 69.497 | 84.343 | 0.00 | 0.00 |
| ATOM | 12241 | H   | PHE | 816 | 98.620  | 68.820 | 83.622 | 0.00 | 0.00 |
| ATOM | 12242 | CA  | PHE | 816 | 99.458  | 69.765 | 85.328 | 0.00 | 0.00 |

|      |       |      |     |     |         |        |        |      |      |
|------|-------|------|-----|-----|---------|--------|--------|------|------|
| ATOM | 12243 | HA   | PHE | 816 | 99.017  | 69.617 | 86.314 | 0.00 | 0.00 |
| ATOM | 12244 | CB   | PHE | 816 | 100.638 | 68.785 | 85.108 | 0.00 | 0.00 |
| ATOM | 12245 | HB2  | PHE | 816 | 100.399 | 67.759 | 85.384 | 0.00 | 0.00 |
| ATOM | 12246 | HB3  | PHE | 816 | 100.881 | 68.659 | 84.053 | 0.00 | 0.00 |
| ATOM | 12247 | CG   | PHE | 816 | 101.942 | 68.957 | 85.842 | 0.00 | 0.00 |
| ATOM | 12248 | CD1  | PHE | 816 | 102.034 | 68.852 | 87.239 | 0.00 | 0.00 |
| ATOM | 12249 | HD1  | PHE | 816 | 101.193 | 68.593 | 87.865 | 0.00 | 0.00 |
| ATOM | 12250 | CE1  | PHE | 816 | 103.255 | 69.095 | 87.909 | 0.00 | 0.00 |
| ATOM | 12251 | HE1  | PHE | 816 | 103.349 | 69.020 | 88.982 | 0.00 | 0.00 |
| ATOM | 12252 | CZ   | PHE | 816 | 104.440 | 69.431 | 87.266 | 0.00 | 0.00 |
| ATOM | 12253 | HZ   | PHE | 816 | 105.361 | 69.643 | 87.788 | 0.00 | 0.00 |
| ATOM | 12254 | CE2  | PHE | 816 | 104.342 | 69.557 | 85.852 | 0.00 | 0.00 |
| ATOM | 12255 | HE2  | PHE | 816 | 105.207 | 69.735 | 85.229 | 0.00 | 0.00 |
| ATOM | 12256 | CD2  | PHE | 816 | 103.122 | 69.298 | 85.142 | 0.00 | 0.00 |
| ATOM | 12257 | HD2  | PHE | 816 | 103.086 | 69.325 | 84.063 | 0.00 | 0.00 |
| ATOM | 12258 | C    | PHE | 816 | 99.973  | 71.239 | 85.316 | 0.00 | 0.00 |
| ATOM | 12259 | O    | PHE | 816 | 100.024 | 71.851 | 86.394 | 0.00 | 0.00 |
| ATOM | 12260 | N    | ILE | 817 | 100.291 | 71.795 | 84.120 | 0.00 | 0.00 |
| ATOM | 12261 | H    | ILE | 817 | 100.406 | 71.178 | 83.329 | 0.00 | 0.00 |
| ATOM | 12262 | CA   | ILE | 817 | 100.726 | 73.235 | 83.909 | 0.00 | 0.00 |
| ATOM | 12263 | HA   | ILE | 817 | 101.435 | 73.492 | 84.696 | 0.00 | 0.00 |
| ATOM | 12264 | CB   | ILE | 817 | 101.529 | 73.313 | 82.606 | 0.00 | 0.00 |
| ATOM | 12265 | HB   | ILE | 817 | 101.957 | 74.315 | 82.591 | 0.00 | 0.00 |
| ATOM | 12266 | CG2  | ILE | 817 | 102.754 | 72.332 | 82.723 | 0.00 | 0.00 |
| ATOM | 12267 | 1HG2 | ILE | 817 | 103.598 | 72.693 | 82.135 | 0.00 | 0.00 |
| ATOM | 12268 | 2HG2 | ILE | 817 | 103.100 | 72.305 | 83.756 | 0.00 | 0.00 |

ATOM 12269 3HG2 ILE 817 102.585 71.325 82.341 0.00 0.00  
ATOM 12270 CG1 ILE 817 100.800 73.123 81.284 0.00 0.00  
ATOM 12271 2HG1 ILE 817 100.571 72.064 81.167 0.00 0.00  
ATOM 12272 3HG1 ILE 817 99.914 73.747 81.163 0.00 0.00  
ATOM 12273 CD1 ILE 817 101.665 73.797 80.169 0.00 0.00  
ATOM 12274 1HD1 ILE 817 102.526 73.191 79.889 0.00 0.00  
ATOM 12275 2HD1 ILE 817 101.126 73.807 79.222 0.00 0.00  
ATOM 12276 3HD1 ILE 817 102.035 74.802 80.372 0.00 0.00  
ATOM 12277 C ILE 817 99.547 74.231 83.994 0.00 0.00  
ATOM 12278 O ILE 817 99.779 75.403 84.244 0.00 0.00  
ATOM 12279 N MET 818 98.239 73.766 83.826 0.00 0.00  
ATOM 12280 H MET 818 97.985 72.825 83.560 0.00 0.00  
ATOM 12281 CA MET 818 97.107 74.566 84.196 0.00 0.00  
ATOM 12282 HA MET 818 97.312 75.594 83.898 0.00 0.00  
ATOM 12283 CB MET 818 95.838 74.030 83.587 0.00 0.00  
ATOM 12284 HB2 MET 818 95.735 72.993 83.906 0.00 0.00  
ATOM 12285 HB3 MET 818 95.059 74.596 84.097 0.00 0.00  
ATOM 12286 CG MET 818 95.657 74.126 82.078 0.00 0.00  
ATOM 12287 HG2 MET 818 95.917 75.139 81.768 0.00 0.00  
ATOM 12288 HG3 MET 818 96.396 73.522 81.553 0.00 0.00  
ATOM 12289 SD MET 818 94.029 73.727 81.448 0.00 0.00  
ATOM 12290 CE MET 818 94.392 74.076 79.708 0.00 0.00  
ATOM 12291 HE1 MET 818 93.547 73.806 79.074 0.00 0.00  
ATOM 12292 HE2 MET 818 94.435 75.145 79.498 0.00 0.00  
ATOM 12293 HE3 MET 818 95.276 73.496 79.447 0.00 0.00  
ATOM 12294 C MET 818 96.879 74.528 85.734 0.00 0.00

|      |       |     |     |     |         |        |        |      |      |
|------|-------|-----|-----|-----|---------|--------|--------|------|------|
| ATOM | 12295 | O   | MET | 818 | 96.489  | 75.499 | 86.292 | 0.00 | 0.00 |
| ATOM | 12296 | N   | GLU | 819 | 97.192  | 73.461 | 86.495 | 0.00 | 0.00 |
| ATOM | 12297 | H   | GLU | 819 | 97.515  | 72.597 | 86.082 | 0.00 | 0.00 |
| ATOM | 12298 | CA  | GLU | 819 | 97.160  | 73.633 | 87.978 | 0.00 | 0.00 |
| ATOM | 12299 | HA  | GLU | 819 | 96.250  | 74.149 | 88.284 | 0.00 | 0.00 |
| ATOM | 12300 | CB  | GLU | 819 | 97.168  | 72.229 | 88.696 | 0.00 | 0.00 |
| ATOM | 12301 | HB2 | GLU | 819 | 97.897  | 71.622 | 88.159 | 0.00 | 0.00 |
| ATOM | 12302 | HB3 | GLU | 819 | 97.313  | 72.320 | 89.773 | 0.00 | 0.00 |
| ATOM | 12303 | CG  | GLU | 819 | 95.933  | 71.418 | 88.571 | 0.00 | 0.00 |
| ATOM | 12304 | HG2 | GLU | 819 | 95.795  | 71.193 | 87.513 | 0.00 | 0.00 |
| ATOM | 12305 | HG3 | GLU | 819 | 96.082  | 70.568 | 89.236 | 0.00 | 0.00 |
| ATOM | 12306 | CD  | GLU | 819 | 94.637  | 72.214 | 88.886 | 0.00 | 0.00 |
| ATOM | 12307 | OE1 | GLU | 819 | 93.996  | 71.741 | 89.893 | 0.00 | 0.00 |
| ATOM | 12308 | OE2 | GLU | 819 | 94.144  | 73.035 | 88.123 | 0.00 | 0.00 |
| ATOM | 12309 | C   | GLU | 819 | 98.427  | 74.284 | 88.625 | 0.00 | 0.00 |
| ATOM | 12310 | O   | GLU | 819 | 98.369  | 74.877 | 89.694 | 0.00 | 0.00 |
| ATOM | 12311 | N   | GLY | 820 | 99.597  | 74.223 | 87.936 | 0.00 | 0.00 |
| ATOM | 12312 | H   | GLY | 820 | 99.645  | 73.684 | 87.083 | 0.00 | 0.00 |
| ATOM | 12313 | CA  | GLY | 820 | 100.653 | 75.180 | 88.236 | 0.00 | 0.00 |
| ATOM | 12314 | HA2 | GLY | 820 | 100.925 | 75.022 | 89.280 | 0.00 | 0.00 |
| ATOM | 12315 | HA3 | GLY | 820 | 101.556 | 75.017 | 87.648 | 0.00 | 0.00 |
| ATOM | 12316 | C   | GLY | 820 | 100.329 | 76.699 | 87.982 | 0.00 | 0.00 |
| ATOM | 12317 | O   | GLY | 820 | 100.687 | 77.522 | 88.786 | 0.00 | 0.00 |
| ATOM | 12318 | N   | ALA | 821 | 99.583  | 76.967 | 86.981 | 0.00 | 0.00 |
| ATOM | 12319 | H   | ALA | 821 | 99.413  | 76.230 | 86.313 | 0.00 | 0.00 |
| ATOM | 12320 | CA  | ALA | 821 | 98.939  | 78.281 | 86.916 | 0.00 | 0.00 |

|      |       |      |     |     |        |        |        |      |      |
|------|-------|------|-----|-----|--------|--------|--------|------|------|
| ATOM | 12321 | HA   | ALA | 821 | 99.737 | 79.022 | 86.963 | 0.00 | 0.00 |
| ATOM | 12322 | CB   | ALA | 821 | 98.302 | 78.309 | 85.546 | 0.00 | 0.00 |
| ATOM | 12323 | HB1  | ALA | 821 | 97.865 | 79.291 | 85.366 | 0.00 | 0.00 |
| ATOM | 12324 | HB2  | ALA | 821 | 99.063 | 78.309 | 84.765 | 0.00 | 0.00 |
| ATOM | 12325 | HB3  | ALA | 821 | 97.495 | 77.581 | 85.468 | 0.00 | 0.00 |
| ATOM | 12326 | C    | ALA | 821 | 98.045 | 78.727 | 88.102 | 0.00 | 0.00 |
| ATOM | 12327 | O    | ALA | 821 | 98.151 | 79.829 | 88.676 | 0.00 | 0.00 |
| ATOM | 12328 | N    | ARG | 822 | 97.169 | 77.817 | 88.443 | 0.00 | 0.00 |
| ATOM | 12329 | H    | ARG | 822 | 97.027 | 76.982 | 87.894 | 0.00 | 0.00 |
| ATOM | 12330 | CA   | ARG | 822 | 96.355 | 78.036 | 89.699 | 0.00 | 0.00 |
| ATOM | 12331 | HA   | ARG | 822 | 95.860 | 79.002 | 89.800 | 0.00 | 0.00 |
| ATOM | 12332 | CB   | ARG | 822 | 95.359 | 76.873 | 89.678 | 0.00 | 0.00 |
| ATOM | 12333 | HB2  | ARG | 822 | 94.722 | 76.827 | 88.794 | 0.00 | 0.00 |
| ATOM | 12334 | HB3  | ARG | 822 | 95.935 | 75.959 | 89.819 | 0.00 | 0.00 |
| ATOM | 12335 | CG   | ARG | 822 | 94.510 | 77.052 | 91.014 | 0.00 | 0.00 |
| ATOM | 12336 | HG2  | ARG | 822 | 93.953 | 76.145 | 91.245 | 0.00 | 0.00 |
| ATOM | 12337 | HG3  | ARG | 822 | 95.157 | 77.083 | 91.890 | 0.00 | 0.00 |
| ATOM | 12338 | CD   | ARG | 822 | 93.553 | 78.186 | 90.919 | 0.00 | 0.00 |
| ATOM | 12339 | HD2  | ARG | 822 | 94.094 | 79.089 | 90.638 | 0.00 | 0.00 |
| ATOM | 12340 | HD3  | ARG | 822 | 92.808 | 78.045 | 90.135 | 0.00 | 0.00 |
| ATOM | 12341 | NE   | ARG | 822 | 92.797 | 78.395 | 92.165 | 0.00 | 0.00 |
| ATOM | 12342 | HE   | ARG | 822 | 91.920 | 77.898 | 92.231 | 0.00 | 0.00 |
| ATOM | 12343 | CZ   | ARG | 822 | 93.195 | 79.063 | 93.250 | 0.00 | 0.00 |
| ATOM | 12344 | NH1  | ARG | 822 | 94.354 | 79.726 | 93.235 | 0.00 | 0.00 |
| ATOM | 12345 | 1HH1 | ARG | 822 | 94.606 | 80.193 | 94.095 | 0.00 | 0.00 |
| ATOM | 12346 | 2HH1 | ARG | 822 | 95.083 | 79.518 | 92.568 | 0.00 | 0.00 |

ATOM 12347 NH2 ARG 822 92.496 79.080 94.323 0.00 0.00  
ATOM 12348 1HH2 ARG 822 92.777 79.365 95.250 0.00 0.00  
ATOM 12349 2HH2 ARG 822 91.639 78.561 94.199 0.00 0.00  
ATOM 12350 C ARG 822 97.266 78.057 90.936 0.00 0.00  
ATOM 12351 O ARG 822 96.777 78.575 91.944 0.00 0.00  
ATOM 12352 N ASP 823 98.485 77.471 90.831 0.00 0.00  
ATOM 12353 H ASP 823 98.611 76.913 89.999 0.00 0.00  
ATOM 12354 CA ASP 823 99.521 77.423 91.982 0.00 0.00  
ATOM 12355 HA ASP 823 99.109 77.387 92.991 0.00 0.00  
ATOM 12356 CB ASP 823 100.449 76.214 91.753 0.00 0.00  
ATOM 12357 HB2 ASP 823 99.869 75.353 91.421 0.00 0.00  
ATOM 12358 HB3 ASP 823 101.056 76.456 90.881 0.00 0.00  
ATOM 12359 CG ASP 823 101.334 75.925 92.954 0.00 0.00  
ATOM 12360 OD1 ASP 823 102.445 75.452 92.746 0.00 0.00  
ATOM 12361 OD2 ASP 823 100.839 75.914 94.115 0.00 0.00  
ATOM 12362 C ASP 823 100.358 78.739 92.005 0.00 0.00  
ATOM 12363 O ASP 823 100.998 79.082 92.990 0.00 0.00  
ATOM 12364 N GLY 824 100.291 79.488 90.912 0.00 0.00  
ATOM 12365 H GLY 824 99.604 79.222 90.221 0.00 0.00  
ATOM 12366 CA GLY 824 100.876 80.799 90.709 0.00 0.00  
ATOM 12367 HA2 GLY 824 100.247 81.345 90.006 0.00 0.00  
ATOM 12368 HA3 GLY 824 100.949 81.304 91.672 0.00 0.00  
ATOM 12369 C GLY 824 102.332 80.798 90.194 0.00 0.00  
ATOM 12370 O GLY 824 102.920 81.858 89.982 0.00 0.00  
ATOM 12371 N LYS 825 102.824 79.615 89.921 0.00 0.00  
ATOM 12372 H LYS 825 102.265 78.774 89.941 0.00 0.00

|      |       |     |     |     |         |        |        |      |      |
|------|-------|-----|-----|-----|---------|--------|--------|------|------|
| ATOM | 12373 | CA  | LYS | 825 | 104.143 | 79.438 | 89.221 | 0.00 | 0.00 |
| ATOM | 12374 | HA  | LYS | 825 | 104.988 | 79.903 | 89.730 | 0.00 | 0.00 |
| ATOM | 12375 | CB  | LYS | 825 | 104.423 | 77.886 | 88.981 | 0.00 | 0.00 |
| ATOM | 12376 | HB2 | LYS | 825 | 103.510 | 77.515 | 88.516 | 0.00 | 0.00 |
| ATOM | 12377 | HB3 | LYS | 825 | 105.203 | 77.746 | 88.232 | 0.00 | 0.00 |
| ATOM | 12378 | CG  | LYS | 825 | 104.798 | 77.200 | 90.228 | 0.00 | 0.00 |
| ATOM | 12379 | HG2 | LYS | 825 | 104.118 | 77.272 | 91.077 | 0.00 | 0.00 |
| ATOM | 12380 | HG3 | LYS | 825 | 105.815 | 77.472 | 90.510 | 0.00 | 0.00 |
| ATOM | 12381 | CD  | LYS | 825 | 104.778 | 75.650 | 89.958 | 0.00 | 0.00 |
| ATOM | 12382 | HD2 | LYS | 825 | 103.734 | 75.362 | 89.833 | 0.00 | 0.00 |
| ATOM | 12383 | HD3 | LYS | 825 | 105.305 | 75.408 | 89.035 | 0.00 | 0.00 |
| ATOM | 12384 | CE  | LYS | 825 | 105.313 | 74.877 | 91.149 | 0.00 | 0.00 |
| ATOM | 12385 | HE2 | LYS | 825 | 106.261 | 75.311 | 91.469 | 0.00 | 0.00 |
| ATOM | 12386 | HE3 | LYS | 825 | 104.630 | 74.990 | 91.991 | 0.00 | 0.00 |
| ATOM | 12387 | NZ  | LYS | 825 | 105.410 | 73.472 | 90.881 | 0.00 | 0.00 |
| ATOM | 12388 | HZ1 | LYS | 825 | 105.710 | 72.930 | 91.679 | 0.00 | 0.00 |
| ATOM | 12389 | HZ2 | LYS | 825 | 104.545 | 73.123 | 90.494 | 0.00 | 0.00 |
| ATOM | 12390 | HZ3 | LYS | 825 | 106.065 | 73.458 | 90.112 | 0.00 | 0.00 |
| ATOM | 12391 | C   | LYS | 825 | 104.121 | 80.045 | 87.844 | 0.00 | 0.00 |
| ATOM | 12392 | O   | LYS | 825 | 103.222 | 79.819 | 87.057 | 0.00 | 0.00 |
| ATOM | 12393 | N   | SER | 826 | 105.197 | 80.745 | 87.496 | 0.00 | 0.00 |
| ATOM | 12394 | H   | SER | 826 | 105.910 | 80.780 | 88.210 | 0.00 | 0.00 |
| ATOM | 12395 | CA  | SER | 826 | 105.183 | 81.696 | 86.429 | 0.00 | 0.00 |
| ATOM | 12396 | HA  | SER | 826 | 104.270 | 82.276 | 86.561 | 0.00 | 0.00 |
| ATOM | 12397 | CB  | SER | 826 | 106.334 | 82.733 | 86.534 | 0.00 | 0.00 |
| ATOM | 12398 | HB2 | SER | 826 | 106.270 | 83.460 | 85.725 | 0.00 | 0.00 |



ATOM 12399 HB3 SER 826 106.070 83.188 87.489 0.00 0.00  
ATOM 12400 OG SER 826 107.567 82.035 86.526 0.00 0.00  
ATOM 12401 HG SER 826 108.110 82.300 87.273 0.00 0.00  
ATOM 12402 C SER 826 105.198 80.909 85.166 0.00 0.00  
ATOM 12403 O SER 826 105.530 79.704 85.164 0.00 0.00  
ATOM 12404 N VAL 827 104.824 81.602 84.024 0.00 0.00  
ATOM 12405 H VAL 827 104.567 82.574 84.119 0.00 0.00  
ATOM 12406 CA VAL 827 105.026 81.020 82.675 0.00 0.00  
ATOM 12407 HA VAL 827 104.474 80.080 82.642 0.00 0.00  
ATOM 12408 CB VAL 827 104.490 81.995 81.584 0.00 0.00  
ATOM 12409 HB VAL 827 104.565 81.472 80.631 0.00 0.00  
ATOM 12410 CG1 VAL 827 103.016 82.355 81.877 0.00 0.00  
ATOM 12411 1HG1 VAL 827 103.027 82.993 82.761 0.00 0.00  
ATOM 12412 2HG1 VAL 827 102.519 82.904 81.077 0.00 0.00  
ATOM 12413 3HG1 VAL 827 102.380 81.483 82.029 0.00 0.00  
ATOM 12414 CG2 VAL 827 105.263 83.251 81.332 0.00 0.00  
ATOM 12415 1HG2 VAL 827 104.618 83.893 80.733 0.00 0.00  
ATOM 12416 2HG2 VAL 827 105.412 83.742 82.294 0.00 0.00  
ATOM 12417 3HG2 VAL 827 106.261 83.143 80.907 0.00 0.00  
ATOM 12418 C VAL 827 106.555 80.574 82.478 0.00 0.00  
ATOM 12419 O VAL 827 106.837 79.660 81.696 0.00 0.00  
ATOM 12420 N ALA 828 107.502 81.291 83.037 0.00 0.00  
ATOM 12421 H ALA 828 107.204 82.156 83.466 0.00 0.00  
ATOM 12422 CA ALA 828 108.976 81.154 82.842 0.00 0.00  
ATOM 12423 HA ALA 828 109.190 81.040 81.779 0.00 0.00  
ATOM 12424 CB ALA 828 109.679 82.426 83.374 0.00 0.00

|      |       |     |     |     |         |        |        |      |      |
|------|-------|-----|-----|-----|---------|--------|--------|------|------|
| ATOM | 12425 | HB1 | ALA | 828 | 109.565 | 83.269 | 82.692 | 0.00 | 0.00 |
| ATOM | 12426 | HB2 | ALA | 828 | 109.410 | 82.711 | 84.391 | 0.00 | 0.00 |
| ATOM | 12427 | HB3 | ALA | 828 | 110.729 | 82.140 | 83.421 | 0.00 | 0.00 |
| ATOM | 12428 | C   | ALA | 828 | 109.403 | 79.893 | 83.511 | 0.00 | 0.00 |
| ATOM | 12429 | O   | ALA | 828 | 110.175 | 79.067 | 82.932 | 0.00 | 0.00 |
| ATOM | 12430 | N   | SER | 829 | 108.818 | 79.562 | 84.695 | 0.00 | 0.00 |
| ATOM | 12431 | H   | SER | 829 | 108.045 | 80.148 | 84.976 | 0.00 | 0.00 |
| ATOM | 12432 | CA  | SER | 829 | 108.970 | 78.277 | 85.356 | 0.00 | 0.00 |
| ATOM | 12433 | HA  | SER | 829 | 110.020 | 77.994 | 85.286 | 0.00 | 0.00 |
| ATOM | 12434 | CB  | SER | 829 | 108.712 | 78.289 | 86.878 | 0.00 | 0.00 |
| ATOM | 12435 | HB2 | SER | 829 | 107.671 | 78.466 | 87.149 | 0.00 | 0.00 |
| ATOM | 12436 | HB3 | SER | 829 | 108.981 | 77.312 | 87.281 | 0.00 | 0.00 |
| ATOM | 12437 | OG  | SER | 829 | 109.508 | 79.255 | 87.612 | 0.00 | 0.00 |
| ATOM | 12438 | HG  | SER | 829 | 109.265 | 79.276 | 88.541 | 0.00 | 0.00 |
| ATOM | 12439 | C   | SER | 829 | 108.254 | 77.108 | 84.584 | 0.00 | 0.00 |
| ATOM | 12440 | O   | SER | 829 | 108.840 | 76.056 | 84.456 | 0.00 | 0.00 |
| ATOM | 12441 | N   | LEU | 830 | 106.963 | 77.298 | 84.195 | 0.00 | 0.00 |
| ATOM | 12442 | H   | LEU | 830 | 106.518 | 78.173 | 84.433 | 0.00 | 0.00 |
| ATOM | 12443 | CA  | LEU | 830 | 106.133 | 76.228 | 83.700 | 0.00 | 0.00 |
| ATOM | 12444 | HA  | LEU | 830 | 106.377 | 75.325 | 84.261 | 0.00 | 0.00 |
| ATOM | 12445 | CB  | LEU | 830 | 104.590 | 76.463 | 83.847 | 0.00 | 0.00 |
| ATOM | 12446 | HB2 | LEU | 830 | 104.289 | 77.422 | 83.426 | 0.00 | 0.00 |
| ATOM | 12447 | HB3 | LEU | 830 | 104.083 | 75.632 | 83.358 | 0.00 | 0.00 |
| ATOM | 12448 | CG  | LEU | 830 | 104.192 | 76.560 | 85.249 | 0.00 | 0.00 |
| ATOM | 12449 | HG  | LEU | 830 | 104.886 | 77.183 | 85.813 | 0.00 | 0.00 |
| ATOM | 12450 | CD1 | LEU | 830 | 102.734 | 77.106 | 85.325 | 0.00 | 0.00 |

|      |       |      |     |     |         |        |        |      |      |
|------|-------|------|-----|-----|---------|--------|--------|------|------|
| ATOM | 12451 | 1HD1 | LEU | 830 | 102.511 | 77.187 | 86.389 | 0.00 | 0.00 |
| ATOM | 12452 | 2HD1 | LEU | 830 | 102.722 | 78.148 | 85.005 | 0.00 | 0.00 |
| ATOM | 12453 | 3HD1 | LEU | 830 | 102.042 | 76.527 | 84.714 | 0.00 | 0.00 |
| ATOM | 12454 | CD2  | LEU | 830 | 104.164 | 75.196 | 85.973 | 0.00 | 0.00 |
| ATOM | 12455 | 1HD2 | LEU | 830 | 103.601 | 75.310 | 86.900 | 0.00 | 0.00 |
| ATOM | 12456 | 2HD2 | LEU | 830 | 103.666 | 74.414 | 85.399 | 0.00 | 0.00 |
| ATOM | 12457 | 3HD2 | LEU | 830 | 105.145 | 74.833 | 86.278 | 0.00 | 0.00 |
| ATOM | 12458 | C    | LEU | 830 | 106.564 | 75.799 | 82.270 | 0.00 | 0.00 |
| ATOM | 12459 | O    | LEU | 830 | 106.472 | 74.627 | 81.957 | 0.00 | 0.00 |
| ATOM | 12460 | N    | MET | 831 | 107.205 | 76.638 | 81.435 | 0.00 | 0.00 |
| ATOM | 12461 | H    | MET | 831 | 107.491 | 77.576 | 81.680 | 0.00 | 0.00 |
| ATOM | 12462 | CA   | MET | 831 | 107.607 | 76.156 | 80.081 | 0.00 | 0.00 |
| ATOM | 12463 | HA   | MET | 831 | 106.784 | 75.623 | 79.605 | 0.00 | 0.00 |
| ATOM | 12464 | CB   | MET | 831 | 108.035 | 77.274 | 79.108 | 0.00 | 0.00 |
| ATOM | 12465 | HB2  | MET | 831 | 108.349 | 76.891 | 78.137 | 0.00 | 0.00 |
| ATOM | 12466 | HB3  | MET | 831 | 107.148 | 77.846 | 78.839 | 0.00 | 0.00 |
| ATOM | 12467 | CG   | MET | 831 | 109.214 | 78.160 | 79.535 | 0.00 | 0.00 |
| ATOM | 12468 | HG2  | MET | 831 | 108.914 | 78.713 | 80.425 | 0.00 | 0.00 |
| ATOM | 12469 | HG3  | MET | 831 | 110.039 | 77.559 | 79.915 | 0.00 | 0.00 |
| ATOM | 12470 | SD   | MET | 831 | 109.812 | 79.222 | 78.131 | 0.00 | 0.00 |
| ATOM | 12471 | CE   | MET | 831 | 110.651 | 80.608 | 78.908 | 0.00 | 0.00 |
| ATOM | 12472 | HE1  | MET | 831 | 111.191 | 80.207 | 79.765 | 0.00 | 0.00 |
| ATOM | 12473 | HE2  | MET | 831 | 111.335 | 81.083 | 78.205 | 0.00 | 0.00 |
| ATOM | 12474 | HE3  | MET | 831 | 109.913 | 81.291 | 79.329 | 0.00 | 0.00 |
| ATOM | 12475 | C    | MET | 831 | 108.704 | 75.080 | 80.120 | 0.00 | 0.00 |
| ATOM | 12476 | O    | MET | 831 | 108.927 | 74.510 | 79.075 | 0.00 | 0.00 |

|      |       |     |     |     |         |        |        |      |      |
|------|-------|-----|-----|-----|---------|--------|--------|------|------|
| ATOM | 12477 | N   | GLU | 832 | 109.379 | 74.851 | 81.285 | 0.00 | 0.00 |
| ATOM | 12478 | H   | GLU | 832 | 109.081 | 75.384 | 82.090 | 0.00 | 0.00 |
| ATOM | 12479 | CA  | GLU | 832 | 110.361 | 73.813 | 81.486 | 0.00 | 0.00 |
| ATOM | 12480 | HA  | GLU | 832 | 110.475 | 73.195 | 80.595 | 0.00 | 0.00 |
| ATOM | 12481 | CB  | GLU | 832 | 111.762 | 74.374 | 81.880 | 0.00 | 0.00 |
| ATOM | 12482 | HB2 | GLU | 832 | 111.639 | 75.115 | 82.670 | 0.00 | 0.00 |
| ATOM | 12483 | HB3 | GLU | 832 | 112.220 | 73.457 | 82.249 | 0.00 | 0.00 |
| ATOM | 12484 | CG  | GLU | 832 | 112.517 | 74.973 | 80.693 | 0.00 | 0.00 |
| ATOM | 12485 | HG2 | GLU | 832 | 112.681 | 74.138 | 80.012 | 0.00 | 0.00 |
| ATOM | 12486 | HG3 | GLU | 832 | 112.052 | 75.863 | 80.269 | 0.00 | 0.00 |
| ATOM | 12487 | CD  | GLU | 832 | 113.854 | 75.427 | 81.157 | 0.00 | 0.00 |
| ATOM | 12488 | OE1 | GLU | 832 | 114.897 | 75.096 | 80.555 | 0.00 | 0.00 |
| ATOM | 12489 | OE2 | GLU | 832 | 113.949 | 76.187 | 82.118 | 0.00 | 0.00 |
| ATOM | 12490 | C   | GLU | 832 | 109.833 | 72.791 | 82.563 | 0.00 | 0.00 |
| ATOM | 12491 | O   | GLU | 832 | 110.301 | 71.668 | 82.633 | 0.00 | 0.00 |
| ATOM | 12492 | N   | GLU | 833 | 108.819 | 73.208 | 83.367 | 0.00 | 0.00 |
| ATOM | 12493 | H   | GLU | 833 | 108.495 | 74.162 | 83.307 | 0.00 | 0.00 |
| ATOM | 12494 | CA  | GLU | 833 | 108.309 | 72.222 | 84.330 | 0.00 | 0.00 |
| ATOM | 12495 | HA  | GLU | 833 | 109.139 | 71.865 | 84.940 | 0.00 | 0.00 |
| ATOM | 12496 | CB  | GLU | 833 | 107.285 | 72.931 | 85.234 | 0.00 | 0.00 |
| ATOM | 12497 | HB2 | GLU | 833 | 107.659 | 73.928 | 85.465 | 0.00 | 0.00 |
| ATOM | 12498 | HB3 | GLU | 833 | 106.450 | 73.191 | 84.583 | 0.00 | 0.00 |
| ATOM | 12499 | CG  | GLU | 833 | 106.768 | 72.305 | 86.506 | 0.00 | 0.00 |
| ATOM | 12500 | HG2 | GLU | 833 | 105.906 | 72.820 | 86.930 | 0.00 | 0.00 |
| ATOM | 12501 | HG3 | GLU | 833 | 106.401 | 71.311 | 86.252 | 0.00 | 0.00 |
| ATOM | 12502 | CD  | GLU | 833 | 107.685 | 72.236 | 87.713 | 0.00 | 0.00 |

|      |       |     |     |     |         |        |        |      |      |
|------|-------|-----|-----|-----|---------|--------|--------|------|------|
| ATOM | 12503 | OE1 | GLU | 833 | 108.788 | 71.746 | 87.510 | 0.00 | 0.00 |
| ATOM | 12504 | OE2 | GLU | 833 | 107.392 | 72.939 | 88.744 | 0.00 | 0.00 |
| ATOM | 12505 | C   | GLU | 833 | 107.638 | 70.990 | 83.583 | 0.00 | 0.00 |
| ATOM | 12506 | O   | GLU | 833 | 107.763 | 69.803 | 83.939 | 0.00 | 0.00 |
| ATOM | 12507 | N   | GLY | 834 | 107.032 | 71.233 | 82.411 | 0.00 | 0.00 |
| ATOM | 12508 | H   | GLY | 834 | 106.986 | 72.207 | 82.148 | 0.00 | 0.00 |
| ATOM | 12509 | CA  | GLY | 834 | 106.562 | 70.222 | 81.415 | 0.00 | 0.00 |
| ATOM | 12510 | HA2 | GLY | 834 | 105.889 | 69.489 | 81.860 | 0.00 | 0.00 |
| ATOM | 12511 | HA3 | GLY | 834 | 106.068 | 70.707 | 80.573 | 0.00 | 0.00 |
| ATOM | 12512 | C   | GLY | 834 | 107.599 | 69.331 | 80.736 | 0.00 | 0.00 |
| ATOM | 12513 | O   | GLY | 834 | 107.294 | 68.456 | 79.937 | 0.00 | 0.00 |
| ATOM | 12514 | N   | ARG | 835 | 108.913 | 69.510 | 80.974 | 0.00 | 0.00 |
| ATOM | 12515 | H   | ARG | 835 | 109.200 | 70.292 | 81.544 | 0.00 | 0.00 |
| ATOM | 12516 | CA  | ARG | 835 | 109.958 | 68.607 | 80.459 | 0.00 | 0.00 |
| ATOM | 12517 | HA  | ARG | 835 | 109.629 | 68.137 | 79.532 | 0.00 | 0.00 |
| ATOM | 12518 | CB  | ARG | 835 | 111.183 | 69.434 | 79.989 | 0.00 | 0.00 |
| ATOM | 12519 | HB2 | ARG | 835 | 111.385 | 70.280 | 80.645 | 0.00 | 0.00 |
| ATOM | 12520 | HB3 | ARG | 835 | 112.024 | 68.764 | 79.809 | 0.00 | 0.00 |
| ATOM | 12521 | CG  | ARG | 835 | 110.778 | 70.109 | 78.597 | 0.00 | 0.00 |
| ATOM | 12522 | HG2 | ARG | 835 | 110.480 | 69.299 | 77.931 | 0.00 | 0.00 |
| ATOM | 12523 | HG3 | ARG | 835 | 109.964 | 70.819 | 78.738 | 0.00 | 0.00 |
| ATOM | 12524 | CD  | ARG | 835 | 111.923 | 70.890 | 78.086 | 0.00 | 0.00 |
| ATOM | 12525 | HD2 | ARG | 835 | 112.129 | 71.669 | 78.819 | 0.00 | 0.00 |
| ATOM | 12526 | HD3 | ARG | 835 | 112.793 | 70.244 | 77.969 | 0.00 | 0.00 |
| ATOM | 12527 | NE  | ARG | 835 | 111.563 | 71.581 | 76.875 | 0.00 | 0.00 |
| ATOM | 12528 | HE  | ARG | 835 | 110.802 | 71.183 | 76.344 | 0.00 | 0.00 |

ATOM 12529 CZ ARG 835 112.190 72.660 76.396 0.00 0.00  
ATOM 12530 NH1 ARG 835 113.199 73.212 77.099 0.00 0.00  
ATOM 12531 1HH1 ARG 835 113.475 74.127 76.773 0.00 0.00  
ATOM 12532 2HH1 ARG 835 113.416 72.996 78.062 0.00 0.00  
ATOM 12533 NH2 ARG 835 111.748 73.260 75.345 0.00 0.00  
ATOM 12534 1HH2 ARG 835 112.310 74.015 74.978 0.00 0.00  
ATOM 12535 2HH2 ARG 835 111.087 72.794 74.741 0.00 0.00  
ATOM 12536 C ARG 835 110.349 67.453 81.371 0.00 0.00  
ATOM 12537 O ARG 835 111.068 66.594 80.778 0.00 0.00  
ATOM 12538 N HIE 836 109.777 67.354 82.580 0.00 0.00  
ATOM 12539 H HIE 836 109.098 68.083 82.747 0.00 0.00  
ATOM 12540 CA HIE 836 110.079 66.228 83.508 0.00 0.00  
ATOM 12541 HA HIE 836 110.574 65.467 82.904 0.00 0.00  
ATOM 12542 CB HIE 836 111.129 66.635 84.541 0.00 0.00  
ATOM 12543 HB2 HIE 836 111.081 67.723 84.595 0.00 0.00  
ATOM 12544 HB3 HIE 836 110.944 66.247 85.543 0.00 0.00  
ATOM 12545 CG HIE 836 112.572 66.291 84.263 0.00 0.00  
ATOM 12546 ND1 HIE 836 113.143 65.045 84.461 0.00 0.00  
ATOM 12547 CE1 HIE 836 114.325 65.093 83.822 0.00 0.00  
ATOM 12548 HE1 HIE 836 114.985 64.240 83.752 0.00 0.00  
ATOM 12549 NE2 HIE 836 114.538 66.295 83.258 0.00 0.00  
ATOM 12550 HE2 HIE 836 115.282 66.483 82.602 0.00 0.00  
ATOM 12551 CD2 HIE 836 113.414 67.009 83.447 0.00 0.00  
ATOM 12552 HD2 HIE 836 113.243 67.995 83.041 0.00 0.00  
ATOM 12553 C HIE 836 108.775 65.500 84.134 0.00 0.00  
ATOM 12554 O HIE 836 108.791 64.620 85.022 0.00 0.00

ATOM 12555 N VAL 837 107.681 65.946 83.590 0.00 0.00  
ATOM 12556 H VAL 837 107.856 66.719 82.964 0.00 0.00  
ATOM 12557 CA VAL 837 106.278 65.634 84.053 0.00 0.00  
ATOM 12558 HA VAL 837 106.200 65.778 85.131 0.00 0.00  
ATOM 12559 CB VAL 837 105.274 66.631 83.350 0.00 0.00  
ATOM 12560 HB VAL 837 105.651 67.602 83.671 0.00 0.00  
ATOM 12561 CG1 VAL 837 105.258 66.512 81.802 0.00 0.00  
ATOM 12562 1HG1 VAL 837 104.888 65.537 81.484 0.00 0.00  
ATOM 12563 2HG1 VAL 837 104.575 67.213 81.322 0.00 0.00  
ATOM 12564 3HG1 VAL 837 106.127 66.857 81.242 0.00 0.00  
ATOM 12565 CG2 VAL 837 103.813 66.404 83.803 0.00 0.00  
ATOM 12566 1HG2 VAL 837 103.088 67.127 83.430 0.00 0.00  
ATOM 12567 2HG2 VAL 837 103.384 65.451 83.493 0.00 0.00  
ATOM 12568 3HG2 VAL 837 103.833 66.446 84.892 0.00 0.00  
ATOM 12569 C VAL 837 105.871 64.163 83.842 0.00 0.00  
ATOM 12570 O VAL 837 105.188 63.597 84.663 0.00 0.00  
ATOM 12571 N LEU 838 106.315 63.476 82.831 0.00 0.00  
ATOM 12572 H LEU 838 106.975 63.951 82.233 0.00 0.00  
ATOM 12573 CA LEU 838 105.953 62.085 82.318 0.00 0.00  
ATOM 12574 HA LEU 838 105.784 61.421 83.166 0.00 0.00  
ATOM 12575 CB LEU 838 104.627 62.202 81.565 0.00 0.00  
ATOM 12576 HB2 LEU 838 104.039 63.034 81.953 0.00 0.00  
ATOM 12577 HB3 LEU 838 104.901 62.407 80.531 0.00 0.00  
ATOM 12578 CG LEU 838 103.791 60.975 81.706 0.00 0.00  
ATOM 12579 HG LEU 838 104.415 60.085 81.625 0.00 0.00  
ATOM 12580 CD1 LEU 838 103.054 60.923 83.054 0.00 0.00

|      |       |      |     |     |         |        |        |      |      |
|------|-------|------|-----|-----|---------|--------|--------|------|------|
| ATOM | 12581 | 1HD1 | LEU | 838 | 103.699 | 60.899 | 83.932 | 0.00 | 0.00 |
| ATOM | 12582 | 2HD1 | LEU | 838 | 102.315 | 61.724 | 83.060 | 0.00 | 0.00 |
| ATOM | 12583 | 3HD1 | LEU | 838 | 102.396 | 60.057 | 82.972 | 0.00 | 0.00 |
| ATOM | 12584 | CD2  | LEU | 838 | 102.736 | 60.857 | 80.574 | 0.00 | 0.00 |
| ATOM | 12585 | 1HD2 | LEU | 838 | 102.336 | 59.849 | 80.686 | 0.00 | 0.00 |
| ATOM | 12586 | 2HD2 | LEU | 838 | 101.979 | 61.641 | 80.609 | 0.00 | 0.00 |
| ATOM | 12587 | 3HD2 | LEU | 838 | 103.088 | 61.037 | 79.558 | 0.00 | 0.00 |
| ATOM | 12588 | C    | LEU | 838 | 107.066 | 61.423 | 81.484 | 0.00 | 0.00 |
| ATOM | 12589 | O    | LEU | 838 | 107.966 | 62.147 | 81.028 | 0.00 | 0.00 |
| ATOM | 12590 | N    | THR | 839 | 107.203 | 60.094 | 81.443 | 0.00 | 0.00 |
| ATOM | 12591 | H    | THR | 839 | 106.596 | 59.533 | 82.023 | 0.00 | 0.00 |
| ATOM | 12592 | CA   | THR | 839 | 108.255 | 59.411 | 80.691 | 0.00 | 0.00 |
| ATOM | 12593 | HA   | THR | 839 | 108.816 | 60.120 | 80.082 | 0.00 | 0.00 |
| ATOM | 12594 | CB   | THR | 839 | 109.262 | 58.733 | 81.632 | 0.00 | 0.00 |
| ATOM | 12595 | HB   | THR | 839 | 109.870 | 58.064 | 81.022 | 0.00 | 0.00 |
| ATOM | 12596 | CG2  | THR | 839 | 110.310 | 59.472 | 82.401 | 0.00 | 0.00 |
| ATOM | 12597 | 1HG2 | THR | 839 | 111.197 | 58.838 | 82.425 | 0.00 | 0.00 |
| ATOM | 12598 | 2HG2 | THR | 839 | 110.490 | 60.346 | 81.776 | 0.00 | 0.00 |
| ATOM | 12599 | 3HG2 | THR | 839 | 109.956 | 59.849 | 83.361 | 0.00 | 0.00 |
| ATOM | 12600 | OG1  | THR | 839 | 108.564 | 57.951 | 82.563 | 0.00 | 0.00 |
| ATOM | 12601 | HG1  | THR | 839 | 109.201 | 57.502 | 83.123 | 0.00 | 0.00 |
| ATOM | 12602 | C    | THR | 839 | 107.755 | 58.217 | 79.801 | 0.00 | 0.00 |
| ATOM | 12603 | O    | THR | 839 | 106.559 | 57.848 | 79.914 | 0.00 | 0.00 |
| ATOM | 12604 | N    | ARG | 840 | 108.552 | 57.690 | 78.909 | 0.00 | 0.00 |
| ATOM | 12605 | H    | ARG | 840 | 109.418 | 58.194 | 78.789 | 0.00 | 0.00 |
| ATOM | 12606 | CA   | ARG | 840 | 108.290 | 56.603 | 78.005 | 0.00 | 0.00 |



|      |       |      |     |     |         |        |        |      |      |
|------|-------|------|-----|-----|---------|--------|--------|------|------|
| ATOM | 12607 | HA   | ARG | 840 | 107.410 | 56.778 | 77.385 | 0.00 | 0.00 |
| ATOM | 12608 | CB   | ARG | 840 | 109.343 | 56.503 | 76.926 | 0.00 | 0.00 |
| ATOM | 12609 | HB2  | ARG | 840 | 109.536 | 57.467 | 76.455 | 0.00 | 0.00 |
| ATOM | 12610 | HB3  | ARG | 840 | 110.250 | 56.066 | 77.343 | 0.00 | 0.00 |
| ATOM | 12611 | CG   | ARG | 840 | 108.758 | 55.576 | 75.788 | 0.00 | 0.00 |
| ATOM | 12612 | HG2  | ARG | 840 | 108.637 | 54.593 | 76.244 | 0.00 | 0.00 |
| ATOM | 12613 | HG3  | ARG | 840 | 107.876 | 56.033 | 75.340 | 0.00 | 0.00 |
| ATOM | 12614 | CD   | ARG | 840 | 109.840 | 55.355 | 74.675 | 0.00 | 0.00 |
| ATOM | 12615 | HD2  | ARG | 840 | 110.675 | 54.895 | 75.203 | 0.00 | 0.00 |
| ATOM | 12616 | HD3  | ARG | 840 | 109.473 | 54.837 | 73.789 | 0.00 | 0.00 |
| ATOM | 12617 | NE   | ARG | 840 | 110.307 | 56.616 | 74.101 | 0.00 | 0.00 |
| ATOM | 12618 | HE   | ARG | 840 | 110.906 | 57.267 | 74.588 | 0.00 | 0.00 |
| ATOM | 12619 | CZ   | ARG | 840 | 109.949 | 57.079 | 72.898 | 0.00 | 0.00 |
| ATOM | 12620 | NH1  | ARG | 840 | 109.097 | 56.448 | 72.173 | 0.00 | 0.00 |
| ATOM | 12621 | 1HH1 | ARG | 840 | 108.708 | 56.864 | 71.339 | 0.00 | 0.00 |
| ATOM | 12622 | 2HH1 | ARG | 840 | 108.670 | 55.576 | 72.453 | 0.00 | 0.00 |
| ATOM | 12623 | NH2  | ARG | 840 | 110.244 | 58.272 | 72.470 | 0.00 | 0.00 |
| ATOM | 12624 | 1HH2 | ARG | 840 | 110.060 | 58.635 | 71.546 | 0.00 | 0.00 |
| ATOM | 12625 | 2HH2 | ARG | 840 | 110.796 | 58.884 | 73.054 | 0.00 | 0.00 |
| ATOM | 12626 | C    | ARG | 840 | 108.005 | 55.340 | 78.814 | 0.00 | 0.00 |
| ATOM | 12627 | O    | ARG | 840 | 107.334 | 54.413 | 78.356 | 0.00 | 0.00 |
| ATOM | 12628 | N    | GLU | 841 | 108.465 | 55.259 | 80.077 | 0.00 | 0.00 |
| ATOM | 12629 | H    | GLU | 841 | 109.068 | 55.992 | 80.422 | 0.00 | 0.00 |
| ATOM | 12630 | CA   | GLU | 841 | 108.170 | 54.115 | 80.932 | 0.00 | 0.00 |
| ATOM | 12631 | HA   | GLU | 841 | 108.312 | 53.201 | 80.354 | 0.00 | 0.00 |
| ATOM | 12632 | CB   | GLU | 841 | 109.034 | 54.140 | 82.168 | 0.00 | 0.00 |

|      |       |      |     |     |         |        |        |      |      |
|------|-------|------|-----|-----|---------|--------|--------|------|------|
| ATOM | 12633 | HB2  | GLU | 841 | 108.948 | 55.089 | 82.698 | 0.00 | 0.00 |
| ATOM | 12634 | HB3  | GLU | 841 | 108.631 | 53.428 | 82.888 | 0.00 | 0.00 |
| ATOM | 12635 | CG   | GLU | 841 | 110.473 | 53.874 | 81.881 | 0.00 | 0.00 |
| ATOM | 12636 | HG2  | GLU | 841 | 110.563 | 52.816 | 81.631 | 0.00 | 0.00 |
| ATOM | 12637 | HG3  | GLU | 841 | 110.813 | 54.442 | 81.015 | 0.00 | 0.00 |
| ATOM | 12638 | CD   | GLU | 841 | 111.408 | 54.109 | 83.113 | 0.00 | 0.00 |
| ATOM | 12639 | OE1  | GLU | 841 | 111.846 | 53.092 | 83.685 | 0.00 | 0.00 |
| ATOM | 12640 | OE2  | GLU | 841 | 111.799 | 55.291 | 83.299 | 0.00 | 0.00 |
| ATOM | 12641 | C    | GLU | 841 | 106.707 | 54.157 | 81.356 | 0.00 | 0.00 |
| ATOM | 12642 | O    | GLU | 841 | 106.111 | 53.109 | 81.666 | 0.00 | 0.00 |
| ATOM | 12643 | N    | GLN | 842 | 106.087 | 55.346 | 81.282 | 0.00 | 0.00 |
| ATOM | 12644 | H    | GLN | 842 | 106.623 | 56.027 | 80.762 | 0.00 | 0.00 |
| ATOM | 12645 | CA   | GLN | 842 | 104.733 | 55.773 | 81.642 | 0.00 | 0.00 |
| ATOM | 12646 | HA   | GLN | 842 | 104.438 | 55.114 | 82.459 | 0.00 | 0.00 |
| ATOM | 12647 | CB   | GLN | 842 | 104.756 | 57.038 | 82.523 | 0.00 | 0.00 |
| ATOM | 12648 | HB2  | GLN | 842 | 105.401 | 57.694 | 81.939 | 0.00 | 0.00 |
| ATOM | 12649 | HB3  | GLN | 842 | 103.801 | 57.530 | 82.703 | 0.00 | 0.00 |
| ATOM | 12650 | CG   | GLN | 842 | 105.447 | 56.839 | 83.854 | 0.00 | 0.00 |
| ATOM | 12651 | HG2  | GLN | 842 | 104.965 | 56.123 | 84.519 | 0.00 | 0.00 |
| ATOM | 12652 | HG3  | GLN | 842 | 106.400 | 56.318 | 83.763 | 0.00 | 0.00 |
| ATOM | 12653 | CD   | GLN | 842 | 105.455 | 58.142 | 84.564 | 0.00 | 0.00 |
| ATOM | 12654 | OE1  | GLN | 842 | 104.469 | 58.597 | 85.166 | 0.00 | 0.00 |
| ATOM | 12655 | NE2  | GLN | 842 | 106.474 | 58.864 | 84.279 | 0.00 | 0.00 |
| ATOM | 12656 | 1HE2 | GLN | 842 | 106.552 | 59.771 | 84.716 | 0.00 | 0.00 |
| ATOM | 12657 | 2HE2 | GLN | 842 | 107.241 | 58.502 | 83.730 | 0.00 | 0.00 |
| ATOM | 12658 | C    | GLN | 842 | 103.596 | 55.800 | 80.529 | 0.00 | 0.00 |

|      |       |      |     |     |         |        |        |      |      |
|------|-------|------|-----|-----|---------|--------|--------|------|------|
| ATOM | 12659 | O    | GLN | 842 | 102.374 | 55.853 | 80.791 | 0.00 | 0.00 |
| ATOM | 12660 | N    | VAL | 843 | 104.096 | 55.874 | 79.283 | 0.00 | 0.00 |
| ATOM | 12661 | H    | VAL | 843 | 105.086 | 56.074 | 79.251 | 0.00 | 0.00 |
| ATOM | 12662 | CA   | VAL | 843 | 103.272 | 55.923 | 78.105 | 0.00 | 0.00 |
| ATOM | 12663 | HA   | VAL | 843 | 102.234 | 55.754 | 78.388 | 0.00 | 0.00 |
| ATOM | 12664 | CB   | VAL | 843 | 103.462 | 57.211 | 77.348 | 0.00 | 0.00 |
| ATOM | 12665 | HB   | VAL | 843 | 102.826 | 57.172 | 76.464 | 0.00 | 0.00 |
| ATOM | 12666 | CG1  | VAL | 843 | 103.108 | 58.391 | 78.221 | 0.00 | 0.00 |
| ATOM | 12667 | 1HG1 | VAL | 843 | 102.970 | 59.296 | 77.630 | 0.00 | 0.00 |
| ATOM | 12668 | 2HG1 | VAL | 843 | 102.144 | 58.222 | 78.702 | 0.00 | 0.00 |
| ATOM | 12669 | 3HG1 | VAL | 843 | 103.790 | 58.473 | 79.067 | 0.00 | 0.00 |
| ATOM | 12670 | CG2  | VAL | 843 | 104.864 | 57.410 | 76.700 | 0.00 | 0.00 |
| ATOM | 12671 | 1HG2 | VAL | 843 | 105.001 | 56.785 | 75.818 | 0.00 | 0.00 |
| ATOM | 12672 | 2HG2 | VAL | 843 | 105.132 | 58.455 | 76.551 | 0.00 | 0.00 |
| ATOM | 12673 | 3HG2 | VAL | 843 | 105.570 | 56.948 | 77.390 | 0.00 | 0.00 |
| ATOM | 12674 | C    | VAL | 843 | 103.476 | 54.718 | 77.108 | 0.00 | 0.00 |
| ATOM | 12675 | O    | VAL | 843 | 104.385 | 53.974 | 77.360 | 0.00 | 0.00 |
| ATOM | 12676 | N    | MET | 844 | 102.755 | 54.590 | 75.993 | 0.00 | 0.00 |
| ATOM | 12677 | H    | MET | 844 | 101.963 | 55.215 | 75.931 | 0.00 | 0.00 |
| ATOM | 12678 | CA   | MET | 844 | 102.946 | 53.676 | 74.892 | 0.00 | 0.00 |
| ATOM | 12679 | HA   | MET | 844 | 103.301 | 52.736 | 75.314 | 0.00 | 0.00 |
| ATOM | 12680 | CB   | MET | 844 | 101.682 | 53.431 | 74.109 | 0.00 | 0.00 |
| ATOM | 12681 | HB2  | MET | 844 | 101.124 | 54.290 | 73.736 | 0.00 | 0.00 |
| ATOM | 12682 | HB3  | MET | 844 | 101.897 | 52.874 | 73.197 | 0.00 | 0.00 |
| ATOM | 12683 | CG   | MET | 844 | 100.708 | 52.550 | 74.862 | 0.00 | 0.00 |
| ATOM | 12684 | HG2  | MET | 844 | 101.133 | 51.597 | 75.176 | 0.00 | 0.00 |

|      |       |     |     |     |         |        |        |      |      |
|------|-------|-----|-----|-----|---------|--------|--------|------|------|
| ATOM | 12685 | HG3 | MET | 844 | 100.352 | 53.066 | 75.755 | 0.00 | 0.00 |
| ATOM | 12686 | SD  | MET | 844 | 99.062  | 52.270 | 74.095 | 0.00 | 0.00 |
| ATOM | 12687 | CE  | MET | 844 | 98.195  | 51.464 | 75.420 | 0.00 | 0.00 |
| ATOM | 12688 | HE1 | MET | 844 | 97.838  | 50.518 | 75.012 | 0.00 | 0.00 |
| ATOM | 12689 | HE2 | MET | 844 | 98.902  | 51.118 | 76.173 | 0.00 | 0.00 |
| ATOM | 12690 | HE3 | MET | 844 | 97.535  | 52.113 | 75.996 | 0.00 | 0.00 |
| ATOM | 12691 | C   | MET | 844 | 104.128 | 53.998 | 73.949 | 0.00 | 0.00 |
| ATOM | 12692 | O   | MET | 844 | 104.717 | 55.027 | 73.825 | 0.00 | 0.00 |
| ATOM | 12693 | N   | GLU | 845 | 104.561 | 52.993 | 73.195 | 0.00 | 0.00 |
| ATOM | 12694 | H   | GLU | 845 | 104.072 | 52.114 | 73.287 | 0.00 | 0.00 |
| ATOM | 12695 | CA  | GLU | 845 | 106.020 | 52.876 | 72.842 | 0.00 | 0.00 |
| ATOM | 12696 | HA  | GLU | 845 | 106.536 | 53.072 | 73.782 | 0.00 | 0.00 |
| ATOM | 12697 | CB  | GLU | 845 | 106.422 | 51.423 | 72.392 | 0.00 | 0.00 |
| ATOM | 12698 | HB2 | GLU | 845 | 105.712 | 50.965 | 71.704 | 0.00 | 0.00 |
| ATOM | 12699 | HB3 | GLU | 845 | 107.431 | 51.430 | 71.980 | 0.00 | 0.00 |
| ATOM | 12700 | CG  | GLU | 845 | 106.550 | 50.428 | 73.570 | 0.00 | 0.00 |
| ATOM | 12701 | HG2 | GLU | 845 | 107.144 | 49.571 | 73.252 | 0.00 | 0.00 |
| ATOM | 12702 | HG3 | GLU | 845 | 107.091 | 50.924 | 74.376 | 0.00 | 0.00 |
| ATOM | 12703 | CD  | GLU | 845 | 105.178 | 50.024 | 74.121 | 0.00 | 0.00 |
| ATOM | 12704 | OE1 | GLU | 845 | 104.849 | 50.362 | 75.268 | 0.00 | 0.00 |
| ATOM | 12705 | OE2 | GLU | 845 | 104.467 | 49.300 | 73.455 | 0.00 | 0.00 |
| ATOM | 12706 | C   | GLU | 845 | 106.507 | 53.860 | 71.851 | 0.00 | 0.00 |
| ATOM | 12707 | O   | GLU | 845 | 107.702 | 54.120 | 71.852 | 0.00 | 0.00 |
| ATOM | 12708 | N   | GLY | 846 | 105.657 | 54.398 | 70.999 | 0.00 | 0.00 |
| ATOM | 12709 | H   | GLY | 846 | 104.704 | 54.076 | 71.083 | 0.00 | 0.00 |
| ATOM | 12710 | CA  | GLY | 846 | 105.811 | 55.431 | 70.001 | 0.00 | 0.00 |

|      |       |      |     |     |         |        |        |      |      |
|------|-------|------|-----|-----|---------|--------|--------|------|------|
| ATOM | 12711 | HA2  | GLY | 846 | 106.842 | 55.750 | 69.850 | 0.00 | 0.00 |
| ATOM | 12712 | HA3  | GLY | 846 | 105.681 | 54.980 | 69.017 | 0.00 | 0.00 |
| ATOM | 12713 | C    | GLY | 846 | 104.990 | 56.671 | 70.357 | 0.00 | 0.00 |
| ATOM | 12714 | O    | GLY | 846 | 104.832 | 57.513 | 69.486 | 0.00 | 0.00 |
| ATOM | 12715 | N    | VAL | 847 | 104.485 | 56.904 | 71.586 | 0.00 | 0.00 |
| ATOM | 12716 | H    | VAL | 847 | 104.640 | 56.205 | 72.299 | 0.00 | 0.00 |
| ATOM | 12717 | CA   | VAL | 847 | 103.745 | 58.108 | 71.944 | 0.00 | 0.00 |
| ATOM | 12718 | HA   | VAL | 847 | 102.970 | 58.222 | 71.186 | 0.00 | 0.00 |
| ATOM | 12719 | CB   | VAL | 847 | 102.834 | 57.946 | 73.235 | 0.00 | 0.00 |
| ATOM | 12720 | HB   | VAL | 847 | 103.449 | 57.375 | 73.931 | 0.00 | 0.00 |
| ATOM | 12721 | CG1  | VAL | 847 | 102.199 | 59.175 | 73.874 | 0.00 | 0.00 |
| ATOM | 12722 | 1HG1 | VAL | 847 | 102.925 | 59.896 | 74.249 | 0.00 | 0.00 |
| ATOM | 12723 | 2HG1 | VAL | 847 | 101.746 | 59.772 | 73.082 | 0.00 | 0.00 |
| ATOM | 12724 | 3HG1 | VAL | 847 | 101.411 | 58.847 | 74.551 | 0.00 | 0.00 |
| ATOM | 12725 | CG2  | VAL | 847 | 101.693 | 56.997 | 72.961 | 0.00 | 0.00 |
| ATOM | 12726 | 1HG2 | VAL | 847 | 101.899 | 56.122 | 72.345 | 0.00 | 0.00 |
| ATOM | 12727 | 2HG2 | VAL | 847 | 101.271 | 56.700 | 73.920 | 0.00 | 0.00 |
| ATOM | 12728 | 3HG2 | VAL | 847 | 100.857 | 57.553 | 72.537 | 0.00 | 0.00 |
| ATOM | 12729 | C    | VAL | 847 | 104.436 | 59.452 | 71.989 | 0.00 | 0.00 |
| ATOM | 12730 | O    | VAL | 847 | 103.822 | 60.401 | 71.438 | 0.00 | 0.00 |
| ATOM | 12731 | N    | PRO | 848 | 105.720 | 59.563 | 72.467 | 0.00 | 0.00 |
| ATOM | 12732 | CD   | PRO | 848 | 106.402 | 58.540 | 73.249 | 0.00 | 0.00 |
| ATOM | 12733 | HD2  | PRO | 848 | 105.694 | 57.969 | 73.850 | 0.00 | 0.00 |
| ATOM | 12734 | HD3  | PRO | 848 | 107.027 | 57.928 | 72.598 | 0.00 | 0.00 |
| ATOM | 12735 | CG   | PRO | 848 | 107.362 | 59.409 | 74.149 | 0.00 | 0.00 |
| ATOM | 12736 | HG2  | PRO | 848 | 106.772 | 59.750 | 75.000 | 0.00 | 0.00 |

|      |       |         |     |         |        |        |      |      |
|------|-------|---------|-----|---------|--------|--------|------|------|
| ATOM | 12737 | HG3 PRO | 848 | 108.290 | 58.895 | 74.402 | 0.00 | 0.00 |
| ATOM | 12738 | CB PRO  | 848 | 107.717 | 60.617 | 73.196 | 0.00 | 0.00 |
| ATOM | 12739 | HB2 PRO | 848 | 107.864 | 61.496 | 73.824 | 0.00 | 0.00 |
| ATOM | 12740 | HB3 PRO | 848 | 108.570 | 60.359 | 72.569 | 0.00 | 0.00 |
| ATOM | 12741 | CA PRO  | 848 | 106.444 | 60.841 | 72.359 | 0.00 | 0.00 |
| ATOM | 12742 | HA PRO  | 848 | 105.883 | 61.619 | 72.877 | 0.00 | 0.00 |
| ATOM | 12743 | C PRO   | 848 | 106.638 | 61.239 | 70.862 | 0.00 | 0.00 |
| ATOM | 12744 | O PRO   | 848 | 106.558 | 62.417 | 70.528 | 0.00 | 0.00 |
| ATOM | 12745 | N GLU   | 849 | 106.708 | 60.421 | 69.845 | 0.00 | 0.00 |
| ATOM | 12746 | H GLU   | 849 | 106.886 | 59.466 | 70.121 | 0.00 | 0.00 |
| ATOM | 12747 | CA GLU  | 849 | 106.793 | 60.695 | 68.402 | 0.00 | 0.00 |
| ATOM | 12748 | HA GLU  | 849 | 107.582 | 61.408 | 68.161 | 0.00 | 0.00 |
| ATOM | 12749 | CB GLU  | 849 | 107.104 | 59.361 | 67.644 | 0.00 | 0.00 |
| ATOM | 12750 | HB2 GLU | 849 | 106.289 | 58.642 | 67.731 | 0.00 | 0.00 |
| ATOM | 12751 | HB3 GLU | 849 | 106.996 | 59.552 | 66.577 | 0.00 | 0.00 |
| ATOM | 12752 | CG GLU  | 849 | 108.479 | 58.764 | 67.857 | 0.00 | 0.00 |
| ATOM | 12753 | HG2 GLU | 849 | 108.515 | 57.830 | 67.297 | 0.00 | 0.00 |
| ATOM | 12754 | HG3 GLU | 849 | 109.221 | 59.444 | 67.438 | 0.00 | 0.00 |
| ATOM | 12755 | CD GLU  | 849 | 108.832 | 58.588 | 69.323 | 0.00 | 0.00 |
| ATOM | 12756 | OE1 GLU | 849 | 110.002 | 58.705 | 69.710 | 0.00 | 0.00 |
| ATOM | 12757 | OE2 GLU | 849 | 107.998 | 58.059 | 70.088 | 0.00 | 0.00 |
| ATOM | 12758 | C GLU   | 849 | 105.423 | 61.167 | 67.897 | 0.00 | 0.00 |
| ATOM | 12759 | O GLU   | 849 | 105.360 | 61.525 | 66.732 | 0.00 | 0.00 |
| ATOM | 12760 | N MET   | 850 | 104.332 | 61.235 | 68.700 | 0.00 | 0.00 |
| ATOM | 12761 | H MET   | 850 | 104.461 | 60.886 | 69.639 | 0.00 | 0.00 |
| ATOM | 12762 | CA MET  | 850 | 103.155 | 62.076 | 68.497 | 0.00 | 0.00 |

|      |       |      |     |     |         |        |        |      |      |
|------|-------|------|-----|-----|---------|--------|--------|------|------|
| ATOM | 12763 | HA   | MET | 850 | 103.133 | 62.439 | 67.469 | 0.00 | 0.00 |
| ATOM | 12764 | CB   | MET | 850 | 101.812 | 61.262 | 68.735 | 0.00 | 0.00 |
| ATOM | 12765 | HB2  | MET | 850 | 101.690 | 60.976 | 69.780 | 0.00 | 0.00 |
| ATOM | 12766 | HB3  | MET | 850 | 100.978 | 61.901 | 68.443 | 0.00 | 0.00 |
| ATOM | 12767 | CG   | MET | 850 | 101.685 | 59.955 | 67.850 | 0.00 | 0.00 |
| ATOM | 12768 | HG2  | MET | 850 | 101.673 | 60.349 | 66.833 | 0.00 | 0.00 |
| ATOM | 12769 | HG3  | MET | 850 | 102.592 | 59.407 | 68.102 | 0.00 | 0.00 |
| ATOM | 12770 | SD   | MET | 850 | 100.163 | 58.990 | 68.224 | 0.00 | 0.00 |
| ATOM | 12771 | CE   | MET | 850 | 98.849  | 59.980 | 67.414 | 0.00 | 0.00 |
| ATOM | 12772 | HE1  | MET | 850 | 99.038  | 60.002 | 66.341 | 0.00 | 0.00 |
| ATOM | 12773 | HE2  | MET | 850 | 97.857  | 59.605 | 67.666 | 0.00 | 0.00 |
| ATOM | 12774 | HE3  | MET | 850 | 98.934  | 60.973 | 67.855 | 0.00 | 0.00 |
| ATOM | 12775 | C    | MET | 850 | 103.075 | 63.316 | 69.270 | 0.00 | 0.00 |
| ATOM | 12776 | O    | MET | 850 | 102.209 | 64.158 | 68.981 | 0.00 | 0.00 |
| ATOM | 12777 | N    | ILE | 851 | 103.969 | 63.597 | 70.220 | 0.00 | 0.00 |
| ATOM | 12778 | H    | ILE | 851 | 104.734 | 62.966 | 70.410 | 0.00 | 0.00 |
| ATOM | 12779 | CA   | ILE | 851 | 103.798 | 64.685 | 71.187 | 0.00 | 0.00 |
| ATOM | 12780 | HA   | ILE | 851 | 102.896 | 65.226 | 70.902 | 0.00 | 0.00 |
| ATOM | 12781 | CB   | ILE | 851 | 103.495 | 64.250 | 72.642 | 0.00 | 0.00 |
| ATOM | 12782 | HB   | ILE | 851 | 104.251 | 63.569 | 73.034 | 0.00 | 0.00 |
| ATOM | 12783 | CG2  | ILE | 851 | 103.243 | 65.338 | 73.637 | 0.00 | 0.00 |
| ATOM | 12784 | 1HG2 | ILE | 851 | 103.457 | 65.031 | 74.661 | 0.00 | 0.00 |
| ATOM | 12785 | 2HG2 | ILE | 851 | 104.044 | 66.069 | 73.528 | 0.00 | 0.00 |
| ATOM | 12786 | 3HG2 | ILE | 851 | 102.217 | 65.698 | 73.563 | 0.00 | 0.00 |
| ATOM | 12787 | CG1  | ILE | 851 | 102.262 | 63.342 | 72.708 | 0.00 | 0.00 |
| ATOM | 12788 | 2HG1 | ILE | 851 | 101.401 | 63.918 | 72.371 | 0.00 | 0.00 |

|      |       |      |     |     |         |        |        |      |      |
|------|-------|------|-----|-----|---------|--------|--------|------|------|
| ATOM | 12789 | 3HG1 | ILE | 851 | 102.274 | 62.521 | 71.991 | 0.00 | 0.00 |
| ATOM | 12790 | CD1  | ILE | 851 | 101.880 | 62.750 | 74.040 | 0.00 | 0.00 |
| ATOM | 12791 | 1HD1 | ILE | 851 | 102.787 | 62.506 | 74.593 | 0.00 | 0.00 |
| ATOM | 12792 | 2HD1 | ILE | 851 | 101.375 | 63.490 | 74.661 | 0.00 | 0.00 |
| ATOM | 12793 | 3HD1 | ILE | 851 | 101.260 | 61.858 | 73.953 | 0.00 | 0.00 |
| ATOM | 12794 | C    | ILE | 851 | 105.067 | 65.558 | 71.020 | 0.00 | 0.00 |
| ATOM | 12795 | O    | ILE | 851 | 105.993 | 65.364 | 71.818 | 0.00 | 0.00 |
| ATOM | 12796 | N    | PRO | 852 | 105.083 | 66.417 | 69.999 | 0.00 | 0.00 |
| ATOM | 12797 | CD   | PRO | 852 | 104.082 | 66.581 | 68.916 | 0.00 | 0.00 |
| ATOM | 12798 | HD2  | PRO | 852 | 104.022 | 65.784 | 68.175 | 0.00 | 0.00 |
| ATOM | 12799 | HD3  | PRO | 852 | 103.134 | 66.815 | 69.402 | 0.00 | 0.00 |
| ATOM | 12800 | CG   | PRO | 852 | 104.596 | 67.792 | 68.125 | 0.00 | 0.00 |
| ATOM | 12801 | HG2  | PRO | 852 | 104.458 | 67.620 | 67.058 | 0.00 | 0.00 |
| ATOM | 12802 | HG3  | PRO | 852 | 104.098 | 68.693 | 68.486 | 0.00 | 0.00 |
| ATOM | 12803 | CB   | PRO | 852 | 106.073 | 67.892 | 68.483 | 0.00 | 0.00 |
| ATOM | 12804 | HB2  | PRO | 852 | 106.565 | 67.064 | 67.972 | 0.00 | 0.00 |
| ATOM | 12805 | HB3  | PRO | 852 | 106.445 | 68.902 | 68.309 | 0.00 | 0.00 |
| ATOM | 12806 | CA   | PRO | 852 | 106.149 | 67.419 | 69.952 | 0.00 | 0.00 |
| ATOM | 12807 | HA   | PRO | 852 | 107.113 | 66.957 | 70.162 | 0.00 | 0.00 |
| ATOM | 12808 | C    | PRO | 852 | 105.948 | 68.536 | 70.937 | 0.00 | 0.00 |
| ATOM | 12809 | O    | PRO | 852 | 106.972 | 69.093 | 71.353 | 0.00 | 0.00 |
| ATOM | 12810 | N    | ASP | 853 | 104.743 | 68.929 | 71.316 | 0.00 | 0.00 |
| ATOM | 12811 | H    | ASP | 853 | 104.010 | 68.316 | 70.989 | 0.00 | 0.00 |
| ATOM | 12812 | CA   | ASP | 853 | 104.373 | 70.149 | 72.103 | 0.00 | 0.00 |
| ATOM | 12813 | HA   | ASP | 853 | 104.993 | 70.012 | 72.989 | 0.00 | 0.00 |
| ATOM | 12814 | CB   | ASP | 853 | 104.719 | 71.369 | 71.306 | 0.00 | 0.00 |



|      |       |      |     |     |         |        |        |      |      |
|------|-------|------|-----|-----|---------|--------|--------|------|------|
| ATOM | 12815 | HB2  | ASP | 853 | 104.702 | 72.148 | 72.068 | 0.00 | 0.00 |
| ATOM | 12816 | HB3  | ASP | 853 | 105.752 | 71.339 | 70.959 | 0.00 | 0.00 |
| ATOM | 12817 | CG   | ASP | 853 | 103.654 | 71.700 | 70.164 | 0.00 | 0.00 |
| ATOM | 12818 | OD1  | ASP | 853 | 102.728 | 72.502 | 70.299 | 0.00 | 0.00 |
| ATOM | 12819 | OD2  | ASP | 853 | 103.680 | 71.143 | 69.049 | 0.00 | 0.00 |
| ATOM | 12820 | C    | ASP | 853 | 102.927 | 70.161 | 72.510 | 0.00 | 0.00 |
| ATOM | 12821 | O    | ASP | 853 | 102.109 | 69.446 | 71.971 | 0.00 | 0.00 |
| ATOM | 12822 | N    | ILE | 854 | 102.641 | 70.914 | 73.558 | 0.00 | 0.00 |
| ATOM | 12823 | H    | ILE | 854 | 103.391 | 71.435 | 73.989 | 0.00 | 0.00 |
| ATOM | 12824 | CA   | ILE | 854 | 101.327 | 71.307 | 74.039 | 0.00 | 0.00 |
| ATOM | 12825 | HA   | ILE | 854 | 100.600 | 71.052 | 73.267 | 0.00 | 0.00 |
| ATOM | 12826 | CB   | ILE | 854 | 100.951 | 70.541 | 75.341 | 0.00 | 0.00 |
| ATOM | 12827 | HB   | ILE | 854 | 99.903  | 70.721 | 75.583 | 0.00 | 0.00 |
| ATOM | 12828 | CG2  | ILE | 854 | 101.081 | 68.991 | 75.198 | 0.00 | 0.00 |
| ATOM | 12829 | 1HG2 | ILE | 854 | 102.059 | 68.727 | 75.600 | 0.00 | 0.00 |
| ATOM | 12830 | 2HG2 | ILE | 854 | 100.422 | 68.417 | 75.848 | 0.00 | 0.00 |
| ATOM | 12831 | 3HG2 | ILE | 854 | 100.988 | 68.630 | 74.174 | 0.00 | 0.00 |
| ATOM | 12832 | CG1  | ILE | 854 | 101.841 | 70.946 | 76.583 | 0.00 | 0.00 |
| ATOM | 12833 | 2HG1 | ILE | 854 | 102.819 | 70.468 | 76.538 | 0.00 | 0.00 |
| ATOM | 12834 | 3HG1 | ILE | 854 | 102.033 | 72.019 | 76.571 | 0.00 | 0.00 |
| ATOM | 12835 | CD1  | ILE | 854 | 101.321 | 70.774 | 77.990 | 0.00 | 0.00 |
| ATOM | 12836 | 1HD1 | ILE | 854 | 101.063 | 69.716 | 77.972 | 0.00 | 0.00 |
| ATOM | 12837 | 2HD1 | ILE | 854 | 101.999 | 70.982 | 78.818 | 0.00 | 0.00 |
| ATOM | 12838 | 3HD1 | ILE | 854 | 100.414 | 71.376 | 78.048 | 0.00 | 0.00 |
| ATOM | 12839 | C    | ILE | 854 | 101.265 | 72.846 | 74.127 | 0.00 | 0.00 |
| ATOM | 12840 | O    | ILE | 854 | 102.246 | 73.401 | 74.605 | 0.00 | 0.00 |

|      |       |      |     |     |         |        |        |      |      |
|------|-------|------|-----|-----|---------|--------|--------|------|------|
| ATOM | 12841 | N    | GLN | 855 | 100.108 | 73.519 | 73.773 | 0.00 | 0.00 |
| ATOM | 12842 | H    | GLN | 855 | 99.361  | 72.977 | 73.361 | 0.00 | 0.00 |
| ATOM | 12843 | CA   | GLN | 855 | 99.868  | 74.978 | 73.983 | 0.00 | 0.00 |
| ATOM | 12844 | HA   | GLN | 855 | 100.829 | 75.374 | 74.310 | 0.00 | 0.00 |
| ATOM | 12845 | CB   | GLN | 855 | 99.461  | 75.580 | 72.621 | 0.00 | 0.00 |
| ATOM | 12846 | HB2  | GLN | 855 | 98.927  | 74.774 | 72.117 | 0.00 | 0.00 |
| ATOM | 12847 | HB3  | GLN | 855 | 98.812  | 76.451 | 72.706 | 0.00 | 0.00 |
| ATOM | 12848 | CG   | GLN | 855 | 100.632 | 75.834 | 71.684 | 0.00 | 0.00 |
| ATOM | 12849 | HG2  | GLN | 855 | 101.039 | 76.833 | 71.843 | 0.00 | 0.00 |
| ATOM | 12850 | HG3  | GLN | 855 | 101.352 | 75.028 | 71.830 | 0.00 | 0.00 |
| ATOM | 12851 | CD   | GLN | 855 | 100.081 | 75.852 | 70.299 | 0.00 | 0.00 |
| ATOM | 12852 | OE1  | GLN | 855 | 98.937  | 76.159 | 69.986 | 0.00 | 0.00 |
| ATOM | 12853 | NE2  | GLN | 855 | 100.809 | 75.517 | 69.267 | 0.00 | 0.00 |
| ATOM | 12854 | 1HE2 | GLN | 855 | 100.485 | 75.694 | 68.326 | 0.00 | 0.00 |
| ATOM | 12855 | 2HE2 | GLN | 855 | 101.744 | 75.149 | 69.365 | 0.00 | 0.00 |
| ATOM | 12856 | C    | GLN | 855 | 98.730  | 74.985 | 75.050 | 0.00 | 0.00 |
| ATOM | 12857 | O    | GLN | 855 | 97.782  | 74.230 | 74.933 | 0.00 | 0.00 |
| ATOM | 12858 | N    | VAL | 856 | 98.730  | 75.989 | 75.998 | 0.00 | 0.00 |
| ATOM | 12859 | H    | VAL | 856 | 99.519  | 76.612 | 76.093 | 0.00 | 0.00 |
| ATOM | 12860 | CA   | VAL | 856 | 97.892  | 76.073 | 77.224 | 0.00 | 0.00 |
| ATOM | 12861 | HA   | VAL | 856 | 96.925  | 75.609 | 77.030 | 0.00 | 0.00 |
| ATOM | 12862 | CB   | VAL | 856 | 98.526  | 75.233 | 78.404 | 0.00 | 0.00 |
| ATOM | 12863 | HB   | VAL | 856 | 99.579  | 75.464 | 78.564 | 0.00 | 0.00 |
| ATOM | 12864 | CG1  | VAL | 856 | 97.794  | 75.462 | 79.700 | 0.00 | 0.00 |
| ATOM | 12865 | 1HG1 | VAL | 856 | 97.980  | 76.483 | 80.034 | 0.00 | 0.00 |
| ATOM | 12866 | 2HG1 | VAL | 856 | 96.721  | 75.294 | 79.602 | 0.00 | 0.00 |

|      |       |      |     |     |        |        |        |      |      |
|------|-------|------|-----|-----|--------|--------|--------|------|------|
| ATOM | 12867 | 3HG1 | VAL | 856 | 98.146 | 74.810 | 80.499 | 0.00 | 0.00 |
| ATOM | 12868 | CG2  | VAL | 856 | 98.378 | 73.697 | 78.178 | 0.00 | 0.00 |
| ATOM | 12869 | 1HG2 | VAL | 856 | 98.774 | 73.368 | 77.217 | 0.00 | 0.00 |
| ATOM | 12870 | 2HG2 | VAL | 856 | 98.822 | 73.198 | 79.040 | 0.00 | 0.00 |
| ATOM | 12871 | 3HG2 | VAL | 856 | 97.302 | 73.524 | 78.162 | 0.00 | 0.00 |
| ATOM | 12872 | C    | VAL | 856 | 97.568 | 77.414 | 77.727 | 0.00 | 0.00 |
| ATOM | 12873 | O    | VAL | 856 | 98.424 | 78.242 | 77.921 | 0.00 | 0.00 |
| ATOM | 12874 | N    | GLU | 857 | 96.253 | 77.697 | 77.998 | 0.00 | 0.00 |
| ATOM | 12875 | H    | GLU | 857 | 95.541 | 77.006 | 77.806 | 0.00 | 0.00 |
| ATOM | 12876 | CA   | GLU | 857 | 95.835 | 78.978 | 78.634 | 0.00 | 0.00 |
| ATOM | 12877 | HA   | GLU | 857 | 96.771 | 79.493 | 78.848 | 0.00 | 0.00 |
| ATOM | 12878 | CB   | GLU | 857 | 94.947 | 79.968 | 77.802 | 0.00 | 0.00 |
| ATOM | 12879 | HB2  | GLU | 857 | 94.098 | 79.435 | 77.375 | 0.00 | 0.00 |
| ATOM | 12880 | HB3  | GLU | 857 | 94.506 | 80.689 | 78.491 | 0.00 | 0.00 |
| ATOM | 12881 | CG   | GLU | 857 | 95.623 | 80.618 | 76.579 | 0.00 | 0.00 |
| ATOM | 12882 | HG2  | GLU | 857 | 95.356 | 80.202 | 75.608 | 0.00 | 0.00 |
| ATOM | 12883 | HG3  | GLU | 857 | 96.698 | 80.651 | 76.758 | 0.00 | 0.00 |
| ATOM | 12884 | CD   | GLU | 857 | 95.202 | 82.064 | 76.333 | 0.00 | 0.00 |
| ATOM | 12885 | OE1  | GLU | 857 | 95.613 | 82.658 | 75.324 | 0.00 | 0.00 |
| ATOM | 12886 | OE2  | GLU | 857 | 94.482 | 82.713 | 77.048 | 0.00 | 0.00 |
| ATOM | 12887 | C    | GLU | 857 | 95.025 | 78.645 | 79.966 | 0.00 | 0.00 |
| ATOM | 12888 | O    | GLU | 857 | 94.155 | 77.771 | 79.982 | 0.00 | 0.00 |
| ATOM | 12889 | N    | ALA | 858 | 95.211 | 79.408 | 81.016 | 0.00 | 0.00 |
| ATOM | 12890 | H    | ALA | 858 | 95.903 | 80.142 | 80.960 | 0.00 | 0.00 |
| ATOM | 12891 | CA   | ALA | 858 | 94.803 | 79.198 | 82.422 | 0.00 | 0.00 |
| ATOM | 12892 | HA   | ALA | 858 | 93.747 | 78.929 | 82.417 | 0.00 | 0.00 |

|      |       |      |     |     |        |        |        |      |      |
|------|-------|------|-----|-----|--------|--------|--------|------|------|
| ATOM | 12893 | CB   | ALA | 858 | 95.500 | 77.941 | 83.104 | 0.00 | 0.00 |
| ATOM | 12894 | HB1  | ALA | 858 | 95.303 | 77.876 | 84.174 | 0.00 | 0.00 |
| ATOM | 12895 | HB2  | ALA | 858 | 94.998 | 77.060 | 82.703 | 0.00 | 0.00 |
| ATOM | 12896 | HB3  | ALA | 858 | 96.567 | 77.843 | 82.906 | 0.00 | 0.00 |
| ATOM | 12897 | C    | ALA | 858 | 95.068 | 80.508 | 83.198 | 0.00 | 0.00 |
| ATOM | 12898 | O    | ALA | 858 | 96.033 | 81.210 | 82.849 | 0.00 | 0.00 |
| ATOM | 12899 | N    | THR | 859 | 94.284 | 80.805 | 84.265 | 0.00 | 0.00 |
| ATOM | 12900 | H    | THR | 859 | 93.542 | 80.162 | 84.504 | 0.00 | 0.00 |
| ATOM | 12901 | CA   | THR | 859 | 94.363 | 82.085 | 85.052 | 0.00 | 0.00 |
| ATOM | 12902 | HA   | THR | 859 | 94.389 | 82.879 | 84.306 | 0.00 | 0.00 |
| ATOM | 12903 | CB   | THR | 859 | 93.123 | 82.398 | 85.943 | 0.00 | 0.00 |
| ATOM | 12904 | HB   | THR | 859 | 93.020 | 81.697 | 86.772 | 0.00 | 0.00 |
| ATOM | 12905 | CG2  | THR | 859 | 93.101 | 83.804 | 86.455 | 0.00 | 0.00 |
| ATOM | 12906 | 1HG2 | THR | 859 | 93.716 | 83.921 | 87.347 | 0.00 | 0.00 |
| ATOM | 12907 | 2HG2 | THR | 859 | 93.445 | 84.551 | 85.739 | 0.00 | 0.00 |
| ATOM | 12908 | 3HG2 | THR | 859 | 92.114 | 84.109 | 86.803 | 0.00 | 0.00 |
| ATOM | 12909 | OG1  | THR | 859 | 91.971 | 82.243 | 85.176 | 0.00 | 0.00 |
| ATOM | 12910 | HG1  | THR | 859 | 91.873 | 81.378 | 84.771 | 0.00 | 0.00 |
| ATOM | 12911 | C    | THR | 859 | 95.660 | 82.112 | 85.856 | 0.00 | 0.00 |
| ATOM | 12912 | O    | THR | 859 | 95.685 | 81.635 | 86.967 | 0.00 | 0.00 |
| ATOM | 12913 | N    | PHE | 860 | 96.677 | 82.816 | 85.346 | 0.00 | 0.00 |
| ATOM | 12914 | H    | PHE | 860 | 96.603 | 82.998 | 84.355 | 0.00 | 0.00 |
| ATOM | 12915 | CA   | PHE | 860 | 97.823 | 83.339 | 86.120 | 0.00 | 0.00 |
| ATOM | 12916 | HA   | PHE | 860 | 98.219 | 82.675 | 86.888 | 0.00 | 0.00 |
| ATOM | 12917 | CB   | PHE | 860 | 98.973 | 83.679 | 85.160 | 0.00 | 0.00 |
| ATOM | 12918 | HB2  | PHE | 860 | 98.475 | 84.308 | 84.423 | 0.00 | 0.00 |

|      |       |     |     |     |         |        |        |      |      |
|------|-------|-----|-----|-----|---------|--------|--------|------|------|
| ATOM | 12919 | HB3 | PHE | 860 | 99.770  | 84.297 | 85.573 | 0.00 | 0.00 |
| ATOM | 12920 | CG  | PHE | 860 | 99.558  | 82.466 | 84.390 | 0.00 | 0.00 |
| ATOM | 12921 | CD1 | PHE | 860 | 100.732 | 81.880 | 84.885 | 0.00 | 0.00 |
| ATOM | 12922 | HD1 | PHE | 860 | 101.244 | 82.333 | 85.721 | 0.00 | 0.00 |
| ATOM | 12923 | CE1 | PHE | 860 | 101.225 | 80.740 | 84.282 | 0.00 | 0.00 |
| ATOM | 12924 | HE1 | PHE | 860 | 102.051 | 80.208 | 84.730 | 0.00 | 0.00 |
| ATOM | 12925 | CZ  | PHE | 860 | 100.587 | 80.202 | 83.167 | 0.00 | 0.00 |
| ATOM | 12926 | HZ  | PHE | 860 | 100.808 | 79.256 | 82.694 | 0.00 | 0.00 |
| ATOM | 12927 | CE2 | PHE | 860 | 99.455  | 80.798 | 82.664 | 0.00 | 0.00 |
| ATOM | 12928 | HE2 | PHE | 860 | 98.900  | 80.308 | 81.877 | 0.00 | 0.00 |
| ATOM | 12929 | CD2 | PHE | 860 | 98.913  | 81.904 | 83.274 | 0.00 | 0.00 |
| ATOM | 12930 | HD2 | PHE | 860 | 98.047  | 82.298 | 82.762 | 0.00 | 0.00 |
| ATOM | 12931 | C   | PHE | 860 | 97.295  | 84.591 | 87.007 | 0.00 | 0.00 |
| ATOM | 12932 | O   | PHE | 860 | 96.122  | 85.023 | 86.892 | 0.00 | 0.00 |
| ATOM | 12933 | N   | PRO | 861 | 98.043  | 85.142 | 87.962 | 0.00 | 0.00 |
| ATOM | 12934 | CD  | PRO | 861 | 99.346  | 84.696 | 88.342 | 0.00 | 0.00 |
| ATOM | 12935 | HD2 | PRO | 861 | 100.032 | 85.233 | 87.687 | 0.00 | 0.00 |
| ATOM | 12936 | HD3 | PRO | 861 | 99.516  | 83.644 | 88.111 | 0.00 | 0.00 |
| ATOM | 12937 | CG  | PRO | 861 | 99.559  | 84.926 | 89.810 | 0.00 | 0.00 |
| ATOM | 12938 | HG2 | PRO | 861 | 98.945  | 84.195 | 90.338 | 0.00 | 0.00 |
| ATOM | 12939 | HG3 | PRO | 861 | 100.621 | 84.962 | 90.050 | 0.00 | 0.00 |
| ATOM | 12940 | CB  | PRO | 861 | 98.977  | 86.301 | 89.757 | 0.00 | 0.00 |
| ATOM | 12941 | HB2 | PRO | 861 | 98.933  | 86.864 | 90.689 | 0.00 | 0.00 |
| ATOM | 12942 | HB3 | PRO | 861 | 99.770  | 86.876 | 89.280 | 0.00 | 0.00 |
| ATOM | 12943 | CA  | PRO | 861 | 97.713  | 86.232 | 88.854 | 0.00 | 0.00 |
| ATOM | 12944 | HA  | PRO | 861 | 96.860  | 85.973 | 89.480 | 0.00 | 0.00 |

|      |       |     |     |     |        |        |        |      |      |
|------|-------|-----|-----|-----|--------|--------|--------|------|------|
| ATOM | 12945 | C   | PRO | 861 | 97.397 | 87.673 | 88.366 | 0.00 | 0.00 |
| ATOM | 12946 | O   | PRO | 861 | 97.301 | 88.584 | 89.152 | 0.00 | 0.00 |
| ATOM | 12947 | N   | ASP | 862 | 97.083 | 87.749 | 87.068 | 0.00 | 0.00 |
| ATOM | 12948 | H   | ASP | 862 | 97.092 | 86.844 | 86.618 | 0.00 | 0.00 |
| ATOM | 12949 | CA  | ASP | 862 | 96.456 | 88.890 | 86.401 | 0.00 | 0.00 |
| ATOM | 12950 | HA  | ASP | 862 | 95.936 | 89.426 | 87.196 | 0.00 | 0.00 |
| ATOM | 12951 | CB  | ASP | 862 | 97.593 | 89.743 | 85.791 | 0.00 | 0.00 |
| ATOM | 12952 | HB2 | ASP | 862 | 97.280 | 90.775 | 85.635 | 0.00 | 0.00 |
| ATOM | 12953 | HB3 | ASP | 862 | 98.378 | 89.820 | 86.543 | 0.00 | 0.00 |
| ATOM | 12954 | CG  | ASP | 862 | 98.208 | 89.230 | 84.434 | 0.00 | 0.00 |
| ATOM | 12955 | OD1 | ASP | 862 | 99.327 | 88.754 | 84.392 | 0.00 | 0.00 |
| ATOM | 12956 | OD2 | ASP | 862 | 97.466 | 89.412 | 83.427 | 0.00 | 0.00 |
| ATOM | 12957 | C   | ASP | 862 | 95.271 | 88.515 | 85.379 | 0.00 | 0.00 |
| ATOM | 12958 | O   | ASP | 862 | 94.578 | 89.342 | 84.840 | 0.00 | 0.00 |
| ATOM | 12959 | N   | GLY | 863 | 95.081 | 87.215 | 85.089 | 0.00 | 0.00 |
| ATOM | 12960 | H   | GLY | 863 | 95.633 | 86.550 | 85.612 | 0.00 | 0.00 |
| ATOM | 12961 | CA  | GLY | 863 | 94.043 | 86.612 | 84.201 | 0.00 | 0.00 |
| ATOM | 12962 | HA2 | GLY | 863 | 93.215 | 86.168 | 84.755 | 0.00 | 0.00 |
| ATOM | 12963 | HA3 | GLY | 863 | 93.731 | 87.450 | 83.578 | 0.00 | 0.00 |
| ATOM | 12964 | C   | GLY | 863 | 94.605 | 85.494 | 83.263 | 0.00 | 0.00 |
| ATOM | 12965 | O   | GLY | 863 | 95.719 | 85.066 | 83.644 | 0.00 | 0.00 |
| ATOM | 12966 | N   | SER | 864 | 94.007 | 85.116 | 82.183 | 0.00 | 0.00 |
| ATOM | 12967 | H   | SER | 864 | 93.151 | 85.583 | 81.917 | 0.00 | 0.00 |
| ATOM | 12968 | CA  | SER | 864 | 94.533 | 84.021 | 81.349 | 0.00 | 0.00 |
| ATOM | 12969 | HA  | SER | 864 | 94.862 | 83.212 | 82.001 | 0.00 | 0.00 |
| ATOM | 12970 | CB  | SER | 864 | 93.451 | 83.406 | 80.483 | 0.00 | 0.00 |

|      |       |     |     |     |         |        |        |      |      |
|------|-------|-----|-----|-----|---------|--------|--------|------|------|
| ATOM | 12971 | HB2 | SER | 864 | 93.271  | 84.002 | 79.588 | 0.00 | 0.00 |
| ATOM | 12972 | HB3 | SER | 864 | 93.743  | 82.427 | 80.104 | 0.00 | 0.00 |
| ATOM | 12973 | OG  | SER | 864 | 92.224  | 83.328 | 81.094 | 0.00 | 0.00 |
| ATOM | 12974 | HG  | SER | 864 | 91.863  | 84.206 | 80.953 | 0.00 | 0.00 |
| ATOM | 12975 | C   | SER | 864 | 95.690  | 84.566 | 80.481 | 0.00 | 0.00 |
| ATOM | 12976 | O   | SER | 864 | 95.684  | 85.631 | 79.874 | 0.00 | 0.00 |
| ATOM | 12977 | N   | LYS | 865 | 96.673  | 83.694 | 80.582 | 0.00 | 0.00 |
| ATOM | 12978 | H   | LYS | 865 | 96.539  | 82.750 | 80.915 | 0.00 | 0.00 |
| ATOM | 12979 | CA  | LYS | 865 | 97.867  | 83.912 | 79.800 | 0.00 | 0.00 |
| ATOM | 12980 | HA  | LYS | 865 | 97.772  | 84.789 | 79.159 | 0.00 | 0.00 |
| ATOM | 12981 | CB  | LYS | 865 | 99.132  | 84.290 | 80.662 | 0.00 | 0.00 |
| ATOM | 12982 | HB2 | LYS | 865 | 99.590  | 83.389 | 81.072 | 0.00 | 0.00 |
| ATOM | 12983 | HB3 | LYS | 865 | 99.939  | 84.661 | 80.030 | 0.00 | 0.00 |
| ATOM | 12984 | CG  | LYS | 865 | 98.881  | 85.209 | 81.910 | 0.00 | 0.00 |
| ATOM | 12985 | HG2 | LYS | 865 | 98.059  | 84.763 | 82.471 | 0.00 | 0.00 |
| ATOM | 12986 | HG3 | LYS | 865 | 99.831  | 85.159 | 82.441 | 0.00 | 0.00 |
| ATOM | 12987 | CD  | LYS | 865 | 98.405  | 86.595 | 81.620 | 0.00 | 0.00 |
| ATOM | 12988 | HD2 | LYS | 865 | 97.685  | 86.592 | 80.801 | 0.00 | 0.00 |
| ATOM | 12989 | HD3 | LYS | 865 | 97.917  | 86.942 | 82.531 | 0.00 | 0.00 |
| ATOM | 12990 | CE  | LYS | 865 | 99.488  | 87.510 | 81.140 | 0.00 | 0.00 |
| ATOM | 12991 | HE2 | LYS | 865 | 100.400 | 87.330 | 81.709 | 0.00 | 0.00 |
| ATOM | 12992 | HE3 | LYS | 865 | 99.637  | 87.195 | 80.108 | 0.00 | 0.00 |
| ATOM | 12993 | NZ  | LYS | 865 | 98.971  | 88.902 | 81.261 | 0.00 | 0.00 |
| ATOM | 12994 | HZ1 | LYS | 865 | 98.467  | 89.123 | 82.108 | 0.00 | 0.00 |
| ATOM | 12995 | HZ2 | LYS | 865 | 99.738  | 89.550 | 81.155 | 0.00 | 0.00 |
| ATOM | 12996 | HZ3 | LYS | 865 | 98.373  | 89.125 | 80.478 | 0.00 | 0.00 |

|      |       |      |     |     |         |        |        |      |      |
|------|-------|------|-----|-----|---------|--------|--------|------|------|
| ATOM | 12997 | C    | LYS | 865 | 98.233  | 82.668 | 78.965 | 0.00 | 0.00 |
| ATOM | 12998 | O    | LYS | 865 | 97.879  | 81.594 | 79.315 | 0.00 | 0.00 |
| ATOM | 12999 | N    | LEU | 866 | 99.150  | 82.805 | 77.977 | 0.00 | 0.00 |
| ATOM | 13000 | H    | LEU | 866 | 99.601  | 83.686 | 77.775 | 0.00 | 0.00 |
| ATOM | 13001 | CA   | LEU | 866 | 99.677  | 81.614 | 77.247 | 0.00 | 0.00 |
| ATOM | 13002 | HA   | LEU | 866 | 99.006  | 80.769 | 77.397 | 0.00 | 0.00 |
| ATOM | 13003 | CB   | LEU | 866 | 99.754  | 81.995 | 75.771 | 0.00 | 0.00 |
| ATOM | 13004 | HB2  | LEU | 866 | 98.783  | 82.398 | 75.485 | 0.00 | 0.00 |
| ATOM | 13005 | HB3  | LEU | 866 | 100.558 | 82.728 | 75.700 | 0.00 | 0.00 |
| ATOM | 13006 | CG   | LEU | 866 | 100.147 | 80.906 | 74.816 | 0.00 | 0.00 |
| ATOM | 13007 | HG   | LEU | 866 | 101.081 | 80.486 | 75.188 | 0.00 | 0.00 |
| ATOM | 13008 | CD1  | LEU | 866 | 99.228  | 79.748 | 74.498 | 0.00 | 0.00 |
| ATOM | 13009 | 1HD1 | LEU | 866 | 98.874  | 79.341 | 75.446 | 0.00 | 0.00 |
| ATOM | 13010 | 2HD1 | LEU | 866 | 98.402  | 80.096 | 73.877 | 0.00 | 0.00 |
| ATOM | 13011 | 3HD1 | LEU | 866 | 99.733  | 78.908 | 74.021 | 0.00 | 0.00 |
| ATOM | 13012 | CD2  | LEU | 866 | 100.601 | 81.599 | 73.519 | 0.00 | 0.00 |
| ATOM | 13013 | 1HD2 | LEU | 866 | 101.208 | 80.909 | 72.932 | 0.00 | 0.00 |
| ATOM | 13014 | 2HD2 | LEU | 866 | 99.711  | 81.833 | 72.934 | 0.00 | 0.00 |
| ATOM | 13015 | 3HD2 | LEU | 866 | 101.285 | 82.414 | 73.755 | 0.00 | 0.00 |
| ATOM | 13016 | C    | LEU | 866 | 100.974 | 81.110 | 77.733 | 0.00 | 0.00 |
| ATOM | 13017 | O    | LEU | 866 | 101.972 | 81.781 | 77.686 | 0.00 | 0.00 |
| ATOM | 13018 | N    | VAL | 867 | 101.027 | 79.799 | 78.081 | 0.00 | 0.00 |
| ATOM | 13019 | H    | VAL | 867 | 100.144 | 79.308 | 78.070 | 0.00 | 0.00 |
| ATOM | 13020 | CA   | VAL | 867 | 102.203 | 78.956 | 78.270 | 0.00 | 0.00 |
| ATOM | 13021 | HA   | VAL | 867 | 102.957 | 79.677 | 77.954 | 0.00 | 0.00 |
| ATOM | 13022 | CB   | VAL | 867 | 102.267 | 78.469 | 79.744 | 0.00 | 0.00 |



ATOM 13023 HB VAL 867 102.169 79.336 80.399 0.00 0.00  
ATOM 13024 CG1 VAL 867 101.117 77.661 80.199 0.00 0.00  
ATOM 13025 1HG1 VAL 867 101.043 76.654 79.788 0.00 0.00  
ATOM 13026 2HG1 VAL 867 101.216 77.631 81.285 0.00 0.00  
ATOM 13027 3HG1 VAL 867 100.172 78.166 80.002 0.00 0.00  
ATOM 13028 CG2 VAL 867 103.555 77.817 80.081 0.00 0.00  
ATOM 13029 1HG2 VAL 867 103.661 76.839 79.612 0.00 0.00  
ATOM 13030 2HG2 VAL 867 104.364 78.383 79.620 0.00 0.00  
ATOM 13031 3HG2 VAL 867 103.665 77.679 81.156 0.00 0.00  
ATOM 13032 C VAL 867 102.257 77.929 77.163 0.00 0.00  
ATOM 13033 O VAL 867 101.245 77.189 76.996 0.00 0.00  
ATOM 13034 N THR 868 103.434 77.680 76.645 0.00 0.00  
ATOM 13035 H THR 868 104.272 78.153 76.952 0.00 0.00  
ATOM 13036 CA THR 868 103.700 76.527 75.801 0.00 0.00  
ATOM 13037 HA THR 868 102.804 75.929 75.635 0.00 0.00  
ATOM 13038 CB THR 868 104.192 76.973 74.396 0.00 0.00  
ATOM 13039 HB THR 868 104.289 76.057 73.814 0.00 0.00  
ATOM 13040 CG2 THR 868 103.229 77.906 73.696 0.00 0.00  
ATOM 13041 1HG2 THR 868 103.502 78.066 72.653 0.00 0.00  
ATOM 13042 2HG2 THR 868 102.238 77.454 73.658 0.00 0.00  
ATOM 13043 3HG2 THR 868 103.113 78.846 74.234 0.00 0.00  
ATOM 13044 OG1 THR 868 105.375 77.692 74.489 0.00 0.00  
ATOM 13045 HG1 THR 868 105.455 77.985 75.400 0.00 0.00  
ATOM 13046 C THR 868 104.630 75.578 76.522 0.00 0.00  
ATOM 13047 O THR 868 105.386 76.032 77.358 0.00 0.00  
ATOM 13048 N VAL 869 104.721 74.325 76.090 0.00 0.00

ATOM 13049 H VAL 869 104.030 74.117 75.384 0.00 0.00  
ATOM 13050 CA VAL 869 105.762 73.358 76.270 0.00 0.00  
ATOM 13051 HA VAL 869 106.675 73.891 76.534 0.00 0.00  
ATOM 13052 CB VAL 869 105.500 72.414 77.479 0.00 0.00  
ATOM 13053 HB VAL 869 104.533 71.975 77.235 0.00 0.00  
ATOM 13054 CG1 VAL 869 106.438 71.249 77.654 0.00 0.00  
ATOM 13055 1HG1 VAL 869 106.376 70.529 78.470 0.00 0.00  
ATOM 13056 2HG1 VAL 869 106.472 70.698 76.714 0.00 0.00  
ATOM 13057 3HG1 VAL 869 107.446 71.631 77.809 0.00 0.00  
ATOM 13058 CG2 VAL 869 105.361 73.233 78.760 0.00 0.00  
ATOM 13059 1HG2 VAL 869 105.142 72.613 79.629 0.00 0.00  
ATOM 13060 2HG2 VAL 869 106.281 73.812 78.852 0.00 0.00  
ATOM 13061 3HG2 VAL 869 104.537 73.930 78.612 0.00 0.00  
ATOM 13062 C VAL 869 106.056 72.537 75.027 0.00 0.00  
ATOM 13063 O VAL 869 105.098 71.996 74.523 0.00 0.00  
ATOM 13064 N HIE 870 107.322 72.387 74.564 0.00 0.00  
ATOM 13065 H HIE 870 107.992 72.831 75.175 0.00 0.00  
ATOM 13066 CA HIE 870 107.814 71.594 73.424 0.00 0.00  
ATOM 13067 HA HIE 870 107.055 70.986 72.931 0.00 0.00  
ATOM 13068 CB HIE 870 108.391 72.472 72.367 0.00 0.00  
ATOM 13069 HB2 HIE 870 109.013 71.813 71.760 0.00 0.00  
ATOM 13070 HB3 HIE 870 107.460 72.662 71.833 0.00 0.00  
ATOM 13071 CG HIE 870 109.117 73.762 72.639 0.00 0.00  
ATOM 13072 ND1 HIE 870 110.528 73.993 72.639 0.00 0.00  
ATOM 13073 CE1 HIE 870 110.686 75.316 72.927 0.00 0.00  
ATOM 13074 HE1 HIE 870 111.611 75.866 73.013 0.00 0.00

|      |       |      |     |     |         |        |        |      |      |
|------|-------|------|-----|-----|---------|--------|--------|------|------|
| ATOM | 13075 | NE2  | HIE | 870 | 109.498 | 75.930 | 73.122 | 0.00 | 0.00 |
| ATOM | 13076 | HE2  | HIE | 870 | 109.306 | 76.892 | 73.364 | 0.00 | 0.00 |
| ATOM | 13077 | CD2  | HIE | 870 | 108.496 | 75.013 | 72.873 | 0.00 | 0.00 |
| ATOM | 13078 | HD2  | HIE | 870 | 107.432 | 75.155 | 72.987 | 0.00 | 0.00 |
| ATOM | 13079 | C    | HIE | 870 | 108.836 | 70.554 | 73.956 | 0.00 | 0.00 |
| ATOM | 13080 | O    | HIE | 870 | 109.603 | 70.720 | 74.941 | 0.00 | 0.00 |
| ATOM | 13081 | N    | ASN | 871 | 109.010 | 69.541 | 73.135 | 0.00 | 0.00 |
| ATOM | 13082 | H    | ASN | 871 | 108.612 | 69.550 | 72.206 | 0.00 | 0.00 |
| ATOM | 13083 | CA   | ASN | 871 | 109.809 | 68.306 | 73.385 | 0.00 | 0.00 |
| ATOM | 13084 | HA   | ASN | 871 | 109.250 | 67.693 | 72.678 | 0.00 | 0.00 |
| ATOM | 13085 | CB   | ASN | 871 | 111.292 | 68.534 | 72.877 | 0.00 | 0.00 |
| ATOM | 13086 | HB2  | ASN | 871 | 111.159 | 69.099 | 71.955 | 0.00 | 0.00 |
| ATOM | 13087 | HB3  | ASN | 871 | 111.772 | 69.208 | 73.588 | 0.00 | 0.00 |
| ATOM | 13088 | CG   | ASN | 871 | 111.990 | 67.130 | 72.509 | 0.00 | 0.00 |
| ATOM | 13089 | OD1  | ASN | 871 | 111.650 | 66.477 | 71.512 | 0.00 | 0.00 |
| ATOM | 13090 | ND2  | ASN | 871 | 113.023 | 66.763 | 73.203 | 0.00 | 0.00 |
| ATOM | 13091 | 1HD2 | ASN | 871 | 113.329 | 65.827 | 72.981 | 0.00 | 0.00 |
| ATOM | 13092 | 2HD2 | ASN | 871 | 113.386 | 67.403 | 73.895 | 0.00 | 0.00 |
| ATOM | 13093 | C    | ASN | 871 | 109.639 | 67.661 | 74.809 | 0.00 | 0.00 |
| ATOM | 13094 | O    | ASN | 871 | 110.700 | 67.455 | 75.501 | 0.00 | 0.00 |
| ATOM | 13095 | N    | PRO | 872 | 108.422 | 67.448 | 75.326 | 0.00 | 0.00 |
| ATOM | 13096 | CD   | PRO | 872 | 107.112 | 67.597 | 74.726 | 0.00 | 0.00 |
| ATOM | 13097 | HD2  | PRO | 872 | 106.988 | 68.649 | 74.466 | 0.00 | 0.00 |
| ATOM | 13098 | HD3  | PRO | 872 | 107.019 | 67.020 | 73.807 | 0.00 | 0.00 |
| ATOM | 13099 | CG   | PRO | 872 | 106.046 | 67.018 | 75.665 | 0.00 | 0.00 |
| ATOM | 13100 | HG2  | PRO | 872 | 105.062 | 67.463 | 75.521 | 0.00 | 0.00 |

|      |       |          |     |         |        |        |      |      |
|------|-------|----------|-----|---------|--------|--------|------|------|
| ATOM | 13101 | HG3 PRO  | 872 | 106.001 | 65.937 | 75.537 | 0.00 | 0.00 |
| ATOM | 13102 | CB PRO   | 872 | 106.741 | 67.193 | 76.993 | 0.00 | 0.00 |
| ATOM | 13103 | HB2 PRO  | 872 | 106.410 | 68.215 | 77.181 | 0.00 | 0.00 |
| ATOM | 13104 | HB3 PRO  | 872 | 106.391 | 66.483 | 77.742 | 0.00 | 0.00 |
| ATOM | 13105 | CA PRO   | 872 | 108.281 | 67.186 | 76.755 | 0.00 | 0.00 |
| ATOM | 13106 | HA PRO   | 872 | 108.675 | 67.982 | 77.388 | 0.00 | 0.00 |
| ATOM | 13107 | C PRO    | 872 | 108.819 | 65.822 | 77.214 | 0.00 | 0.00 |
| ATOM | 13108 | O PRO    | 872 | 108.972 | 65.704 | 78.453 | 0.00 | 0.00 |
| ATOM | 13109 | N ILE    | 873 | 108.946 | 64.803 | 76.339 | 0.00 | 0.00 |
| ATOM | 13110 | H ILE    | 873 | 108.733 | 65.038 | 75.380 | 0.00 | 0.00 |
| ATOM | 13111 | CA ILE   | 873 | 109.169 | 63.343 | 76.690 | 0.00 | 0.00 |
| ATOM | 13112 | HA ILE   | 873 | 109.535 | 63.249 | 77.713 | 0.00 | 0.00 |
| ATOM | 13113 | CB ILE   | 873 | 107.892 | 62.509 | 76.711 | 0.00 | 0.00 |
| ATOM | 13114 | HB ILE   | 873 | 107.594 | 62.354 | 75.674 | 0.00 | 0.00 |
| ATOM | 13115 | CG2 ILE  | 873 | 108.207 | 61.114 | 77.364 | 0.00 | 0.00 |
| ATOM | 13116 | 1HG2 ILE | 873 | 108.467 | 61.238 | 78.415 | 0.00 | 0.00 |
| ATOM | 13117 | 2HG2 ILE | 873 | 107.327 | 60.472 | 77.403 | 0.00 | 0.00 |
| ATOM | 13118 | 3HG2 ILE | 873 | 109.048 | 60.665 | 76.834 | 0.00 | 0.00 |
| ATOM | 13119 | CG1 ILE  | 873 | 106.716 | 63.235 | 77.364 | 0.00 | 0.00 |
| ATOM | 13120 | 2HG1 ILE | 873 | 106.659 | 63.367 | 78.445 | 0.00 | 0.00 |
| ATOM | 13121 | 3HG1 ILE | 873 | 106.600 | 64.217 | 76.905 | 0.00 | 0.00 |
| ATOM | 13122 | CD1 ILE  | 873 | 105.457 | 62.439 | 77.084 | 0.00 | 0.00 |
| ATOM | 13123 | 1HD1 ILE | 873 | 104.639 | 63.155 | 77.168 | 0.00 | 0.00 |
| ATOM | 13124 | 2HD1 ILE | 873 | 105.445 | 61.977 | 76.097 | 0.00 | 0.00 |
| ATOM | 13125 | 3HD1 ILE | 873 | 105.339 | 61.703 | 77.879 | 0.00 | 0.00 |
| ATOM | 13126 | C ILE    | 873 | 110.328 | 62.810 | 75.784 | 0.00 | 0.00 |

ATOM 13127 O ILE 873 110.379 63.184 74.590 0.00 0.00  
ATOM 13128 N ILC 874 111.073 61.863 76.284 0.00 0.00  
ATOM 13129 H ILC 874 110.853 61.589 77.231 0.00 0.00  
ATOM 13130 CA ILC 874 112.316 61.240 75.690 0.00 0.00  
ATOM 13131 HA ILC 874 112.704 61.889 74.905 0.00 0.00  
ATOM 13132 CB ILC 874 113.532 61.139 76.652 0.00 0.00  
ATOM 13133 HB ILC 874 113.209 60.343 77.324 0.00 0.00  
ATOM 13134 CG2 ILC 874 114.727 60.613 75.936 0.00 0.00  
ATOM 13135 1HG2 ILC 874 114.501 59.632 75.518 0.00 0.00  
ATOM 13136 2HG2 ILC 874 114.972 61.328 75.151 0.00 0.00  
ATOM 13137 3HG2 ILC 874 115.547 60.555 76.651 0.00 0.00  
ATOM 13138 CG1 ILC 874 113.822 62.419 77.451 0.00 0.00  
ATOM 13139 2HG1 ILC 874 113.009 62.732 78.106 0.00 0.00  
ATOM 13140 3HG1 ILC 874 114.665 62.127 78.077 0.00 0.00  
ATOM 13141 CD1 ILC 874 114.155 63.646 76.609 0.00 0.00  
ATOM 13142 1HD1 ILC 874 113.887 64.604 77.055 0.00 0.00  
ATOM 13143 2HD1 ILC 874 115.223 63.670 76.393 0.00 0.00  
ATOM 13144 3HD1 ILC 874 113.562 63.776 75.704 0.00 0.00  
ATOM 13145 C ILC 874 111.961 59.897 75.007 0.00 0.00  
ATOM 13146 O ILC 874 111.494 58.983 75.733 0.00 0.00  
ATOM 13147 OXT ILC 874 112.040 59.917 73.775 0.00 0.00  
ATOM 13148 N MEN 875 108.895 54.711 60.869 0.00 0.00  
ATOM 13149 H1 MEN 875 108.357 53.862 60.970 0.00 0.00  
ATOM 13150 H2 MEN 875 109.650 54.441 60.255 0.00 0.00  
ATOM 13151 H3 MEN 875 108.173 55.155 60.320 0.00 0.00  
ATOM 13152 CA MEN 875 109.290 55.265 62.189 0.00 0.00

|      |       |      |     |     |         |        |        |      |      |
|------|-------|------|-----|-----|---------|--------|--------|------|------|
| ATOM | 13153 | HA   | MEN | 875 | 109.645 | 54.466 | 62.840 | 0.00 | 0.00 |
| ATOM | 13154 | CB   | MEN | 875 | 110.592 | 56.048 | 62.143 | 0.00 | 0.00 |
| ATOM | 13155 | HB2  | MEN | 875 | 111.390 | 55.374 | 61.832 | 0.00 | 0.00 |
| ATOM | 13156 | HB3  | MEN | 875 | 110.498 | 56.886 | 61.452 | 0.00 | 0.00 |
| ATOM | 13157 | CG   | MEN | 875 | 110.941 | 56.421 | 63.619 | 0.00 | 0.00 |
| ATOM | 13158 | HG2  | MEN | 875 | 109.980 | 56.622 | 64.093 | 0.00 | 0.00 |
| ATOM | 13159 | HG3  | MEN | 875 | 111.329 | 55.522 | 64.097 | 0.00 | 0.00 |
| ATOM | 13160 | SD   | MEN | 875 | 112.179 | 57.713 | 63.817 | 0.00 | 0.00 |
| ATOM | 13161 | CE   | MEN | 875 | 113.405 | 56.840 | 64.837 | 0.00 | 0.00 |
| ATOM | 13162 | HE1  | MEN | 875 | 114.220 | 57.536 | 65.031 | 0.00 | 0.00 |
| ATOM | 13163 | HE2  | MEN | 875 | 112.990 | 56.503 | 65.787 | 0.00 | 0.00 |
| ATOM | 13164 | HE3  | MEN | 875 | 113.870 | 56.067 | 64.225 | 0.00 | 0.00 |
| ATOM | 13165 | C    | MEN | 875 | 108.120 | 56.090 | 62.747 | 0.00 | 0.00 |
| ATOM | 13166 | O    | MEN | 875 | 107.686 | 55.751 | 63.829 | 0.00 | 0.00 |
| ATOM | 13167 | N    | ILE | 876 | 107.708 | 57.140 | 62.072 | 0.00 | 0.00 |
| ATOM | 13168 | H    | ILE | 876 | 108.230 | 57.434 | 61.259 | 0.00 | 0.00 |
| ATOM | 13169 | CA   | ILE | 876 | 106.693 | 58.079 | 62.572 | 0.00 | 0.00 |
| ATOM | 13170 | HA   | ILE | 876 | 106.466 | 57.708 | 63.571 | 0.00 | 0.00 |
| ATOM | 13171 | CB   | ILE | 876 | 107.367 | 59.480 | 62.662 | 0.00 | 0.00 |
| ATOM | 13172 | HB   | ILE | 876 | 107.785 | 59.608 | 61.663 | 0.00 | 0.00 |
| ATOM | 13173 | CG2  | ILE | 876 | 106.351 | 60.619 | 62.776 | 0.00 | 0.00 |
| ATOM | 13174 | 1HG2 | ILE | 876 | 106.923 | 61.510 | 62.516 | 0.00 | 0.00 |
| ATOM | 13175 | 2HG2 | ILE | 876 | 105.550 | 60.695 | 62.041 | 0.00 | 0.00 |
| ATOM | 13176 | 3HG2 | ILE | 876 | 105.862 | 60.721 | 63.745 | 0.00 | 0.00 |
| ATOM | 13177 | CG1  | ILE | 876 | 108.459 | 59.531 | 63.731 | 0.00 | 0.00 |
| ATOM | 13178 | 2HG1 | ILE | 876 | 108.056 | 59.240 | 64.701 | 0.00 | 0.00 |

|      |       |      |     |     |         |        |        |      |      |
|------|-------|------|-----|-----|---------|--------|--------|------|------|
| ATOM | 13179 | 3HG1 | ILE | 876 | 109.212 | 58.757 | 63.587 | 0.00 | 0.00 |
| ATOM | 13180 | CD1  | ILE | 876 | 109.235 | 60.814 | 63.948 | 0.00 | 0.00 |
| ATOM | 13181 | 1HD1 | ILE | 876 | 109.919 | 60.965 | 63.113 | 0.00 | 0.00 |
| ATOM | 13182 | 2HD1 | ILE | 876 | 108.554 | 61.664 | 63.992 | 0.00 | 0.00 |
| ATOM | 13183 | 3HD1 | ILE | 876 | 109.848 | 60.722 | 64.845 | 0.00 | 0.00 |
| ATOM | 13184 | C    | ILE | 876 | 105.397 | 58.107 | 61.759 | 0.00 | 0.00 |
| ATOM | 13185 | O    | ILE | 876 | 105.515 | 58.138 | 60.554 | 0.00 | 0.00 |
| ATOM | 13186 | N    | PRO | 877 | 104.200 | 58.125 | 62.390 | 0.00 | 0.00 |
| ATOM | 13187 | CD   | PRO | 877 | 103.882 | 57.992 | 63.826 | 0.00 | 0.00 |
| ATOM | 13188 | HD2  | PRO | 877 | 104.624 | 57.379 | 64.337 | 0.00 | 0.00 |
| ATOM | 13189 | HD3  | PRO | 877 | 103.846 | 58.940 | 64.363 | 0.00 | 0.00 |
| ATOM | 13190 | CG   | PRO | 877 | 102.533 | 57.347 | 63.889 | 0.00 | 0.00 |
| ATOM | 13191 | HG2  | PRO | 877 | 102.592 | 56.295 | 63.610 | 0.00 | 0.00 |
| ATOM | 13192 | HG3  | PRO | 877 | 102.178 | 57.303 | 64.919 | 0.00 | 0.00 |
| ATOM | 13193 | CB   | PRO | 877 | 101.883 | 58.256 | 62.865 | 0.00 | 0.00 |
| ATOM | 13194 | HB2  | PRO | 877 | 100.982 | 57.804 | 62.450 | 0.00 | 0.00 |
| ATOM | 13195 | HB3  | PRO | 877 | 101.812 | 59.295 | 63.185 | 0.00 | 0.00 |
| ATOM | 13196 | CA   | PRO | 877 | 102.944 | 58.351 | 61.752 | 0.00 | 0.00 |
| ATOM | 13197 | HA   | PRO | 877 | 102.895 | 57.560 | 61.005 | 0.00 | 0.00 |
| ATOM | 13198 | C    | PRO | 877 | 102.920 | 59.565 | 60.833 | 0.00 | 0.00 |
| ATOM | 13199 | O    | PRO | 877 | 103.170 | 60.733 | 61.368 | 0.00 | 0.00 |
| ATOM | 13200 | N    | GLY | 878 | 102.474 | 59.425 | 59.602 | 0.00 | 0.00 |
| ATOM | 13201 | H    | GLY | 878 | 102.139 | 58.530 | 59.274 | 0.00 | 0.00 |
| ATOM | 13202 | CA   | GLY | 878 | 102.481 | 60.541 | 58.594 | 0.00 | 0.00 |
| ATOM | 13203 | HA2  | GLY | 878 | 101.943 | 60.185 | 57.715 | 0.00 | 0.00 |
| ATOM | 13204 | HA3  | GLY | 878 | 101.931 | 61.380 | 59.021 | 0.00 | 0.00 |

|      |       |     |     |     |         |        |        |      |      |
|------|-------|-----|-----|-----|---------|--------|--------|------|------|
| ATOM | 13205 | C   | GLY | 878 | 103.905 | 61.050 | 58.136 | 0.00 | 0.00 |
| ATOM | 13206 | O   | GLY | 878 | 103.920 | 62.112 | 57.567 | 0.00 | 0.00 |
| ATOM | 13207 | N   | GLU | 879 | 104.979 | 60.255 | 58.408 | 0.00 | 0.00 |
| ATOM | 13208 | H   | GLU | 879 | 104.821 | 59.385 | 58.895 | 0.00 | 0.00 |
| ATOM | 13209 | CA  | GLU | 879 | 106.366 | 60.605 | 57.979 | 0.00 | 0.00 |
| ATOM | 13210 | HA  | GLU | 879 | 106.615 | 61.590 | 58.372 | 0.00 | 0.00 |
| ATOM | 13211 | CB  | GLU | 879 | 107.392 | 59.603 | 58.484 | 0.00 | 0.00 |
| ATOM | 13212 | HB2 | GLU | 879 | 108.366 | 60.080 | 58.374 | 0.00 | 0.00 |
| ATOM | 13213 | HB3 | GLU | 879 | 107.212 | 59.524 | 59.556 | 0.00 | 0.00 |
| ATOM | 13214 | CG  | GLU | 879 | 107.480 | 58.222 | 57.837 | 0.00 | 0.00 |
| ATOM | 13215 | HG2 | GLU | 879 | 106.498 | 57.818 | 57.592 | 0.00 | 0.00 |
| ATOM | 13216 | HG3 | GLU | 879 | 108.032 | 58.245 | 56.897 | 0.00 | 0.00 |
| ATOM | 13217 | CD  | GLU | 879 | 108.105 | 57.247 | 58.779 | 0.00 | 0.00 |
| ATOM | 13218 | OE1 | GLU | 879 | 109.112 | 57.566 | 59.404 | 0.00 | 0.00 |
| ATOM | 13219 | OE2 | GLU | 879 | 107.565 | 56.084 | 58.865 | 0.00 | 0.00 |
| ATOM | 13220 | C   | GLU | 879 | 106.403 | 60.779 | 56.432 | 0.00 | 0.00 |
| ATOM | 13221 | O   | GLU | 879 | 105.633 | 60.039 | 55.767 | 0.00 | 0.00 |
| ATOM | 13222 | N   | TYR | 880 | 107.061 | 61.766 | 55.804 | 0.00 | 0.00 |
| ATOM | 13223 | H   | TYR | 880 | 107.561 | 62.429 | 56.380 | 0.00 | 0.00 |
| ATOM | 13224 | CA  | TYR | 880 | 107.210 | 61.917 | 54.313 | 0.00 | 0.00 |
| ATOM | 13225 | HA  | TYR | 880 | 106.682 | 61.029 | 53.966 | 0.00 | 0.00 |
| ATOM | 13226 | CB  | TYR | 880 | 106.477 | 63.135 | 53.867 | 0.00 | 0.00 |
| ATOM | 13227 | HB2 | TYR | 880 | 106.243 | 62.987 | 52.813 | 0.00 | 0.00 |
| ATOM | 13228 | HB3 | TYR | 880 | 105.559 | 63.288 | 54.434 | 0.00 | 0.00 |
| ATOM | 13229 | CG  | TYR | 880 | 107.296 | 64.411 | 53.901 | 0.00 | 0.00 |
| ATOM | 13230 | CD1 | TYR | 880 | 107.564 | 65.002 | 55.164 | 0.00 | 0.00 |



|      |       |     |     |     |         |        |        |      |      |
|------|-------|-----|-----|-----|---------|--------|--------|------|------|
| ATOM | 13231 | HD1 | TYR | 880 | 107.218 | 64.503 | 56.058 | 0.00 | 0.00 |
| ATOM | 13232 | CE1 | TYR | 880 | 108.346 | 66.190 | 55.238 | 0.00 | 0.00 |
| ATOM | 13233 | HE1 | TYR | 880 | 108.612 | 66.575 | 56.211 | 0.00 | 0.00 |
| ATOM | 13234 | CZ  | TYR | 880 | 108.849 | 66.791 | 54.047 | 0.00 | 0.00 |
| ATOM | 13235 | OH  | TYR | 880 | 109.597 | 67.849 | 53.993 | 0.00 | 0.00 |
| ATOM | 13236 | HH  | TYR | 880 | 109.714 | 68.301 | 54.832 | 0.00 | 0.00 |
| ATOM | 13237 | CE2 | TYR | 880 | 108.544 | 66.242 | 52.794 | 0.00 | 0.00 |
| ATOM | 13238 | HE2 | TYR | 880 | 108.823 | 66.654 | 51.836 | 0.00 | 0.00 |
| ATOM | 13239 | CD2 | TYR | 880 | 107.819 | 64.993 | 52.707 | 0.00 | 0.00 |
| ATOM | 13240 | HD2 | TYR | 880 | 107.574 | 64.613 | 51.726 | 0.00 | 0.00 |
| ATOM | 13241 | C   | TYR | 880 | 108.633 | 61.684 | 53.815 | 0.00 | 0.00 |
| ATOM | 13242 | O   | TYR | 880 | 109.567 | 61.711 | 54.670 | 0.00 | 0.00 |
| ATOM | 13243 | N   | HIE | 881 | 108.877 | 61.660 | 52.530 | 0.00 | 0.00 |
| ATOM | 13244 | H   | HIE | 881 | 108.099 | 61.739 | 51.891 | 0.00 | 0.00 |
| ATOM | 13245 | CA  | HIE | 881 | 110.253 | 61.573 | 52.010 | 0.00 | 0.00 |
| ATOM | 13246 | HA  | HIE | 881 | 110.993 | 61.913 | 52.735 | 0.00 | 0.00 |
| ATOM | 13247 | CB  | HIE | 881 | 110.591 | 60.015 | 51.899 | 0.00 | 0.00 |
| ATOM | 13248 | HB2 | HIE | 881 | 110.560 | 59.543 | 52.881 | 0.00 | 0.00 |
| ATOM | 13249 | HB3 | HIE | 881 | 109.821 | 59.438 | 51.385 | 0.00 | 0.00 |
| ATOM | 13250 | CG  | HIE | 881 | 111.928 | 59.636 | 51.201 | 0.00 | 0.00 |
| ATOM | 13251 | ND1 | HIE | 881 | 112.249 | 59.973 | 49.881 | 0.00 | 0.00 |
| ATOM | 13252 | CE1 | HIE | 881 | 113.471 | 59.359 | 49.713 | 0.00 | 0.00 |
| ATOM | 13253 | HE1 | HIE | 881 | 114.089 | 59.530 | 48.844 | 0.00 | 0.00 |
| ATOM | 13254 | NE2 | HIE | 881 | 113.929 | 58.687 | 50.772 | 0.00 | 0.00 |
| ATOM | 13255 | HE2 | HIE | 881 | 114.791 | 58.189 | 50.942 | 0.00 | 0.00 |
| ATOM | 13256 | CD2 | HIE | 881 | 112.852 | 58.719 | 51.685 | 0.00 | 0.00 |

ATOM 13257 HD2 HIE 881 112.919 58.405 52.717 0.00 0.00  
ATOM 13258 C HIE 881 110.400 62.345 50.643 0.00 0.00  
ATOM 13259 O HIE 881 109.505 62.565 49.785 0.00 0.00  
ATOM 13260 N VAL 882 111.671 62.798 50.402 0.00 0.00  
ATOM 13261 H VAL 882 112.396 62.590 51.074 0.00 0.00  
ATOM 13262 CA VAL 882 111.996 63.779 49.304 0.00 0.00  
ATOM 13263 HA VAL 882 111.133 63.854 48.643 0.00 0.00  
ATOM 13264 CB VAL 882 112.323 65.197 49.819 0.00 0.00  
ATOM 13265 HB VAL 882 113.233 65.155 50.418 0.00 0.00  
ATOM 13266 CG1 VAL 882 112.646 66.294 48.819 0.00 0.00  
ATOM 13267 1HG1 VAL 882 112.711 67.249 49.341 0.00 0.00  
ATOM 13268 2HG1 VAL 882 113.573 66.023 48.313 0.00 0.00  
ATOM 13269 3HG1 VAL 882 111.790 66.330 48.146 0.00 0.00  
ATOM 13270 CG2 VAL 882 111.233 65.752 50.749 0.00 0.00  
ATOM 13271 1HG2 VAL 882 111.193 65.133 51.646 0.00 0.00  
ATOM 13272 2HG2 VAL 882 111.586 66.672 51.213 0.00 0.00  
ATOM 13273 3HG2 VAL 882 110.301 65.993 50.239 0.00 0.00  
ATOM 13274 C VAL 882 113.202 63.230 48.522 0.00 0.00  
ATOM 13275 O VAL 882 114.233 62.805 49.107 0.00 0.00  
ATOM 13276 N LYS 883 113.086 63.115 47.183 0.00 0.00  
ATOM 13277 H LYS 883 112.208 63.364 46.749 0.00 0.00  
ATOM 13278 CA LYS 883 114.164 62.762 46.338 0.00 0.00  
ATOM 13279 HA LYS 883 114.635 61.854 46.715 0.00 0.00  
ATOM 13280 CB LYS 883 113.643 62.490 44.915 0.00 0.00  
ATOM 13281 HB2 LYS 883 113.091 63.336 44.505 0.00 0.00  
ATOM 13282 HB3 LYS 883 114.500 62.376 44.252 0.00 0.00

ATOM 13283 CG LYS 883 112.685 61.231 44.679 0.00 0.00  
ATOM 13284 HG2 LYS 883 113.151 60.261 44.859 0.00 0.00  
ATOM 13285 HG3 LYS 883 111.740 61.334 45.212 0.00 0.00  
ATOM 13286 CD LYS 883 112.219 61.149 43.158 0.00 0.00  
ATOM 13287 HD2 LYS 883 111.537 61.997 43.093 0.00 0.00  
ATOM 13288 HD3 LYS 883 112.994 61.266 42.402 0.00 0.00  
ATOM 13289 CE LYS 883 111.495 59.793 43.025 0.00 0.00  
ATOM 13290 HE2 LYS 883 111.003 59.667 43.989 0.00 0.00  
ATOM 13291 HE3 LYS 883 110.750 59.720 42.233 0.00 0.00  
ATOM 13292 NZ LYS 883 112.526 58.695 42.820 0.00 0.00  
ATOM 13293 HZ1 LYS 883 112.467 57.841 43.356 0.00 0.00  
ATOM 13294 HZ2 LYS 883 112.701 58.359 41.884 0.00 0.00  
ATOM 13295 HZ3 LYS 883 113.429 59.034 43.118 0.00 0.00  
ATOM 13296 C LYS 883 115.296 63.800 46.190 0.00 0.00  
ATOM 13297 O LYS 883 114.950 64.969 46.067 0.00 0.00  
ATOM 13298 N PRO 884 116.616 63.402 46.156 0.00 0.00  
ATOM 13299 CD PRO 884 117.148 62.096 46.227 0.00 0.00  
ATOM 13300 HD2 PRO 884 116.948 61.630 47.192 0.00 0.00  
ATOM 13301 HD3 PRO 884 116.786 61.420 45.452 0.00 0.00  
ATOM 13302 CG PRO 884 118.666 62.206 46.377 0.00 0.00  
ATOM 13303 HG2 PRO 884 119.075 61.573 47.165 0.00 0.00  
ATOM 13304 HG3 PRO 884 119.123 61.783 45.483 0.00 0.00  
ATOM 13305 CB PRO 884 119.046 63.675 46.591 0.00 0.00  
ATOM 13306 HB2 PRO 884 119.171 63.900 47.650 0.00 0.00  
ATOM 13307 HB3 PRO 884 119.858 64.018 45.951 0.00 0.00  
ATOM 13308 CA PRO 884 117.739 64.312 46.088 0.00 0.00

ATOM 13309 HA PRO 884 117.508 65.076 46.830 0.00 0.00  
ATOM 13310 C PRO 884 118.010 65.040 44.776 0.00 0.00  
ATOM 13311 O PRO 884 117.847 64.439 43.698 0.00 0.00  
ATOM 13312 N GLY 885 118.521 66.280 44.816 0.00 0.00  
ATOM 13313 H GLY 885 118.628 66.742 45.708 0.00 0.00  
ATOM 13314 CA GLY 885 118.796 67.089 43.704 0.00 0.00  
ATOM 13315 HA2 GLY 885 119.848 66.930 43.469 0.00 0.00  
ATOM 13316 HA3 GLY 885 118.109 66.694 42.955 0.00 0.00  
ATOM 13317 C GLY 885 118.518 68.572 43.972 0.00 0.00  
ATOM 13318 O GLY 885 118.541 69.060 45.084 0.00 0.00  
ATOM 13319 N GLN 886 118.529 69.375 42.908 0.00 0.00  
ATOM 13320 H GLN 886 118.625 68.913 42.015 0.00 0.00  
ATOM 13321 CA GLN 886 118.701 70.838 42.967 0.00 0.00  
ATOM 13322 HA GLN 886 118.698 71.205 43.994 0.00 0.00  
ATOM 13323 CB GLN 886 120.151 71.149 42.421 0.00 0.00  
ATOM 13324 HB2 GLN 886 120.902 70.468 42.821 0.00 0.00  
ATOM 13325 HB3 GLN 886 120.102 70.926 41.355 0.00 0.00  
ATOM 13326 CG GLN 886 120.607 72.548 42.591 0.00 0.00  
ATOM 13327 HG2 GLN 886 119.859 73.255 42.951 0.00 0.00  
ATOM 13328 HG3 GLN 886 121.335 72.604 43.400 0.00 0.00  
ATOM 13329 CD GLN 886 121.292 72.992 41.309 0.00 0.00  
ATOM 13330 OE1 GLN 886 120.701 73.628 40.424 0.00 0.00  
ATOM 13331 NE2 GLN 886 122.549 72.772 41.052 0.00 0.00  
ATOM 13332 1HE2 GLN 886 122.980 73.251 40.275 0.00 0.00  
ATOM 13333 2HE2 GLN 886 123.024 72.223 41.754 0.00 0.00  
ATOM 13334 C GLN 886 117.528 71.398 42.123 0.00 0.00

ATOM 13335 O GLN 886 117.186 70.886 41.071 0.00 0.00  
ATOM 13336 N ILE 887 116.885 72.475 42.586 0.00 0.00  
ATOM 13337 H ILE 887 117.243 72.880 43.439 0.00 0.00  
ATOM 13338 CA ILE 887 115.722 73.262 42.082 0.00 0.00  
ATOM 13339 HA ILE 887 115.431 72.843 41.119 0.00 0.00  
ATOM 13340 CB ILE 887 114.632 73.347 43.080 0.00 0.00  
ATOM 13341 HB ILE 887 114.963 73.753 44.035 0.00 0.00  
ATOM 13342 CG2 ILE 887 113.483 74.281 42.590 0.00 0.00  
ATOM 13343 1HG2 ILE 887 112.620 74.153 43.243 0.00 0.00  
ATOM 13344 2HG2 ILE 887 113.768 75.325 42.724 0.00 0.00  
ATOM 13345 3HG2 ILE 887 113.195 73.987 41.581 0.00 0.00  
ATOM 13346 CG1 ILE 887 114.028 71.936 43.501 0.00 0.00  
ATOM 13347 2HG1 ILE 887 114.815 71.505 44.120 0.00 0.00  
ATOM 13348 3HG1 ILE 887 113.175 72.249 44.102 0.00 0.00  
ATOM 13349 CD1 ILE 887 113.633 70.936 42.383 0.00 0.00  
ATOM 13350 1HD1 ILE 887 113.137 70.109 42.890 0.00 0.00  
ATOM 13351 2HD1 ILE 887 112.977 71.471 41.696 0.00 0.00  
ATOM 13352 3HD1 ILE 887 114.469 70.556 41.795 0.00 0.00  
ATOM 13353 C ILE 887 116.148 74.724 41.651 0.00 0.00  
ATOM 13354 O ILE 887 116.329 75.637 42.493 0.00 0.00  
ATOM 13355 N ALA 888 116.406 74.876 40.326 0.00 0.00  
ATOM 13356 H ALA 888 116.284 74.013 39.815 0.00 0.00  
ATOM 13357 CA ALA 888 116.704 76.158 39.630 0.00 0.00  
ATOM 13358 HA ALA 888 117.513 76.671 40.151 0.00 0.00  
ATOM 13359 CB ALA 888 117.172 75.842 38.172 0.00 0.00  
ATOM 13360 HB1 ALA 888 117.670 76.706 37.732 0.00 0.00

|      |       |      |     |     |         |        |        |      |      |
|------|-------|------|-----|-----|---------|--------|--------|------|------|
| ATOM | 13361 | HB2  | ALA | 888 | 117.890 | 75.023 | 38.189 | 0.00 | 0.00 |
| ATOM | 13362 | HB3  | ALA | 888 | 116.415 | 75.555 | 37.441 | 0.00 | 0.00 |
| ATOM | 13363 | C    | ALA | 888 | 115.445 | 77.074 | 39.557 | 0.00 | 0.00 |
| ATOM | 13364 | O    | ALA | 888 | 114.438 | 76.746 | 38.906 | 0.00 | 0.00 |
| ATOM | 13365 | N    | LEU | 889 | 115.627 | 78.250 | 40.114 | 0.00 | 0.00 |
| ATOM | 13366 | H    | LEU | 889 | 116.533 | 78.559 | 40.436 | 0.00 | 0.00 |
| ATOM | 13367 | CA   | LEU | 889 | 114.510 | 79.202 | 40.313 | 0.00 | 0.00 |
| ATOM | 13368 | HA   | LEU | 889 | 113.607 | 78.602 | 40.199 | 0.00 | 0.00 |
| ATOM | 13369 | CB   | LEU | 889 | 114.537 | 79.924 | 41.698 | 0.00 | 0.00 |
| ATOM | 13370 | HB2  | LEU | 889 | 115.414 | 80.571 | 41.684 | 0.00 | 0.00 |
| ATOM | 13371 | HB3  | LEU | 889 | 113.660 | 80.547 | 41.873 | 0.00 | 0.00 |
| ATOM | 13372 | CG   | LEU | 889 | 114.772 | 79.017 | 42.876 | 0.00 | 0.00 |
| ATOM | 13373 | HG   | LEU | 889 | 115.614 | 78.386 | 42.592 | 0.00 | 0.00 |
| ATOM | 13374 | CD1  | LEU | 889 | 115.130 | 79.806 | 44.161 | 0.00 | 0.00 |
| ATOM | 13375 | 1HD1 | LEU | 889 | 116.198 | 80.023 | 44.202 | 0.00 | 0.00 |
| ATOM | 13376 | 2HD1 | LEU | 889 | 114.710 | 80.812 | 44.151 | 0.00 | 0.00 |
| ATOM | 13377 | 3HD1 | LEU | 889 | 114.914 | 79.307 | 45.106 | 0.00 | 0.00 |
| ATOM | 13378 | CD2  | LEU | 889 | 113.618 | 78.143 | 43.203 | 0.00 | 0.00 |
| ATOM | 13379 | 1HD2 | LEU | 889 | 113.867 | 77.574 | 44.098 | 0.00 | 0.00 |
| ATOM | 13380 | 2HD2 | LEU | 889 | 112.828 | 78.774 | 43.609 | 0.00 | 0.00 |
| ATOM | 13381 | 3HD2 | LEU | 889 | 113.251 | 77.562 | 42.356 | 0.00 | 0.00 |
| ATOM | 13382 | C    | LEU | 889 | 114.334 | 80.189 | 39.192 | 0.00 | 0.00 |
| ATOM | 13383 | O    | LEU | 889 | 115.370 | 80.663 | 38.765 | 0.00 | 0.00 |
| ATOM | 13384 | N    | ASN | 890 | 113.113 | 80.569 | 38.854 | 0.00 | 0.00 |
| ATOM | 13385 | H    | ASN | 890 | 112.422 | 79.982 | 39.301 | 0.00 | 0.00 |
| ATOM | 13386 | CA   | ASN | 890 | 112.672 | 81.598 | 37.950 | 0.00 | 0.00 |

ATOM 13387 HA ASN 890 111.587 81.516 37.888 0.00 0.00  
ATOM 13388 CB ASN 890 112.955 82.986 38.665 0.00 0.00  
ATOM 13389 HB2 ASN 890 114.023 83.204 38.672 0.00 0.00  
ATOM 13390 HB3 ASN 890 112.478 83.782 38.093 0.00 0.00  
ATOM 13391 CG ASN 890 112.674 83.064 40.103 0.00 0.00  
ATOM 13392 OD1 ASN 890 111.597 82.864 40.574 0.00 0.00  
ATOM 13393 ND2 ASN 890 113.667 83.312 40.950 0.00 0.00  
ATOM 13394 1HD2 ASN 890 113.348 83.376 41.907 0.00 0.00  
ATOM 13395 2HD2 ASN 890 114.558 83.671 40.639 0.00 0.00  
ATOM 13396 C ASN 890 113.283 81.704 36.517 0.00 0.00  
ATOM 13397 O ASN 890 113.502 82.811 35.952 0.00 0.00  
ATOM 13398 N THR 891 113.537 80.514 35.937 0.00 0.00  
ATOM 13399 H THR 891 113.258 79.611 36.293 0.00 0.00  
ATOM 13400 CA THR 891 114.114 80.487 34.608 0.00 0.00  
ATOM 13401 HA THR 891 115.070 80.999 34.720 0.00 0.00  
ATOM 13402 CB THR 891 114.397 79.018 34.164 0.00 0.00  
ATOM 13403 HB THR 891 114.796 79.082 33.152 0.00 0.00  
ATOM 13404 CG2 THR 891 115.356 78.424 35.107 0.00 0.00  
ATOM 13405 1HG2 THR 891 116.328 78.899 34.975 0.00 0.00  
ATOM 13406 2HG2 THR 891 115.079 78.547 36.154 0.00 0.00  
ATOM 13407 3HG2 THR 891 115.276 77.345 34.979 0.00 0.00  
ATOM 13408 OG1 THR 891 113.202 78.268 34.077 0.00 0.00  
ATOM 13409 HG1 THR 891 112.720 78.476 34.881 0.00 0.00  
ATOM 13410 C THR 891 113.310 81.249 33.514 0.00 0.00  
ATOM 13411 O THR 891 112.096 81.491 33.704 0.00 0.00  
ATOM 13412 N GLY 892 113.923 81.596 32.449 0.00 0.00

ATOM 13413 H GLY 892 114.892 81.317 32.387 0.00 0.00  
ATOM 13414 CA GLY 892 113.365 82.136 31.259 0.00 0.00  
ATOM 13415 HA2 GLY 892 114.173 82.227 30.533 0.00 0.00  
ATOM 13416 HA3 GLY 892 112.544 81.538 30.865 0.00 0.00  
ATOM 13417 C GLY 892 112.830 83.634 31.336 0.00 0.00  
ATOM 13418 O GLY 892 111.933 84.078 30.562 0.00 0.00  
ATOM 13419 N ARG 893 113.365 84.311 32.328 0.00 0.00  
ATOM 13420 H ARG 893 114.044 83.761 32.834 0.00 0.00  
ATOM 13421 CA ARG 893 113.147 85.793 32.447 0.00 0.00  
ATOM 13422 HA ARG 893 112.773 86.104 31.472 0.00 0.00  
ATOM 13423 CB ARG 893 112.159 86.002 33.585 0.00 0.00  
ATOM 13424 HB2 ARG 893 112.452 85.507 34.511 0.00 0.00  
ATOM 13425 HB3 ARG 893 112.191 87.044 33.903 0.00 0.00  
ATOM 13426 CG ARG 893 110.688 85.670 33.333 0.00 0.00  
ATOM 13427 HG2 ARG 893 110.121 86.411 33.897 0.00 0.00  
ATOM 13428 HG3 ARG 893 110.371 85.833 32.303 0.00 0.00  
ATOM 13429 CD ARG 893 110.217 84.296 33.819 0.00 0.00  
ATOM 13430 HD2 ARG 893 109.217 84.086 33.440 0.00 0.00  
ATOM 13431 HD3 ARG 893 110.808 83.449 33.470 0.00 0.00  
ATOM 13432 NE ARG 893 109.939 84.251 35.312 0.00 0.00  
ATOM 13433 HE ARG 893 109.886 85.119 35.825 0.00 0.00  
ATOM 13434 CZ ARG 893 109.650 83.126 35.973 0.00 0.00  
ATOM 13435 NH1 ARG 893 109.797 81.957 35.434 0.00 0.00  
ATOM 13436 1HH1 ARG 893 109.235 81.248 35.885 0.00 0.00  
ATOM 13437 2HH1 ARG 893 110.225 81.741 34.545 0.00 0.00  
ATOM 13438 NH2 ARG 893 109.129 83.146 37.142 0.00 0.00



ATOM 13439 1HH2 ARG 893 108.878 82.239 37.510 0.00 0.00  
ATOM 13440 2HH2 ARG 893 109.050 84.002 37.672 0.00 0.00  
ATOM 13441 C ARG 893 114.448 86.549 32.628 0.00 0.00  
ATOM 13442 O ARG 893 115.389 85.961 33.155 0.00 0.00  
ATOM 13443 N ALA 894 114.554 87.817 32.242 0.00 0.00  
ATOM 13444 H ALA 894 113.718 88.244 31.871 0.00 0.00  
ATOM 13445 CA ALA 894 115.657 88.668 32.457 0.00 0.00  
ATOM 13446 HA ALA 894 116.561 88.171 32.103 0.00 0.00  
ATOM 13447 CB ALA 894 115.434 89.984 31.762 0.00 0.00  
ATOM 13448 HB1 ALA 894 115.292 89.851 30.689 0.00 0.00  
ATOM 13449 HB2 ALA 894 114.518 90.351 32.225 0.00 0.00  
ATOM 13450 HB3 ALA 894 116.270 90.660 31.939 0.00 0.00  
ATOM 13451 C ALA 894 116.049 88.951 33.934 0.00 0.00  
ATOM 13452 O ALA 894 115.233 89.297 34.821 0.00 0.00  
ATOM 13453 N THR 895 117.388 88.866 34.188 0.00 0.00  
ATOM 13454 H THR 895 118.050 88.535 33.501 0.00 0.00  
ATOM 13455 CA THR 895 117.952 89.319 35.471 0.00 0.00  
ATOM 13456 HA THR 895 117.205 89.520 36.240 0.00 0.00  
ATOM 13457 CB THR 895 118.760 88.122 35.990 0.00 0.00  
ATOM 13458 HB THR 895 119.410 88.362 36.832 0.00 0.00  
ATOM 13459 CG2 THR 895 117.743 87.041 36.474 0.00 0.00  
ATOM 13460 1HG2 THR 895 116.901 87.590 36.896 0.00 0.00  
ATOM 13461 2HG2 THR 895 117.405 86.530 35.573 0.00 0.00  
ATOM 13462 3HG2 THR 895 118.218 86.325 37.145 0.00 0.00  
ATOM 13463 OG1 THR 895 119.461 87.592 34.966 0.00 0.00  
ATOM 13464 HG1 THR 895 120.049 86.925 35.330 0.00 0.00

|      |       |     |     |     |         |        |        |      |      |
|------|-------|-----|-----|-----|---------|--------|--------|------|------|
| ATOM | 13465 | C   | THR | 895 | 118.860 | 90.580 | 35.402 | 0.00 | 0.00 |
| ATOM | 13466 | O   | THR | 895 | 119.256 | 90.984 | 34.261 | 0.00 | 0.00 |
| ATOM | 13467 | N   | CYS | 896 | 118.888 | 91.240 | 36.587 | 0.00 | 0.00 |
| ATOM | 13468 | H   | CYS | 896 | 118.583 | 90.819 | 37.453 | 0.00 | 0.00 |
| ATOM | 13469 | CA  | CYS | 896 | 119.530 | 92.512 | 36.790 | 0.00 | 0.00 |
| ATOM | 13470 | HA  | CYS | 896 | 120.300 | 92.765 | 36.061 | 0.00 | 0.00 |
| ATOM | 13471 | CB  | CYS | 896 | 118.424 | 93.653 | 36.667 | 0.00 | 0.00 |
| ATOM | 13472 | HB2 | CYS | 896 | 118.300 | 93.885 | 35.609 | 0.00 | 0.00 |
| ATOM | 13473 | HB3 | CYS | 896 | 117.517 | 93.217 | 37.085 | 0.00 | 0.00 |
| ATOM | 13474 | SG  | CYS | 896 | 118.883 | 95.136 | 37.563 | 0.00 | 0.00 |
| ATOM | 13475 | HG  | CYS | 896 | 117.914 | 96.034 | 37.367 | 0.00 | 0.00 |
| ATOM | 13476 | C   | CYS | 896 | 120.134 | 92.574 | 38.200 | 0.00 | 0.00 |
| ATOM | 13477 | O   | CYS | 896 | 119.563 | 92.079 | 39.165 | 0.00 | 0.00 |
| ATOM | 13478 | N   | ARG | 897 | 121.240 | 93.335 | 38.448 | 0.00 | 0.00 |
| ATOM | 13479 | H   | ARG | 897 | 121.727 | 93.792 | 37.691 | 0.00 | 0.00 |
| ATOM | 13480 | CA  | ARG | 897 | 121.695 | 93.606 | 39.864 | 0.00 | 0.00 |
| ATOM | 13481 | HA  | ARG | 897 | 120.901 | 93.310 | 40.550 | 0.00 | 0.00 |
| ATOM | 13482 | CB  | ARG | 897 | 123.112 | 92.904 | 40.095 | 0.00 | 0.00 |
| ATOM | 13483 | HB2 | ARG | 897 | 123.888 | 93.527 | 39.650 | 0.00 | 0.00 |
| ATOM | 13484 | HB3 | ARG | 897 | 123.257 | 92.957 | 41.174 | 0.00 | 0.00 |
| ATOM | 13485 | CG  | ARG | 897 | 123.275 | 91.479 | 39.643 | 0.00 | 0.00 |
| ATOM | 13486 | HG2 | ARG | 897 | 122.874 | 91.239 | 38.658 | 0.00 | 0.00 |
| ATOM | 13487 | HG3 | ARG | 897 | 122.687 | 90.814 | 40.276 | 0.00 | 0.00 |
| ATOM | 13488 | CD  | ARG | 897 | 124.738 | 91.155 | 39.759 | 0.00 | 0.00 |
| ATOM | 13489 | HD2 | ARG | 897 | 124.985 | 90.149 | 39.421 | 0.00 | 0.00 |
| ATOM | 13490 | HD3 | ARG | 897 | 125.280 | 91.868 | 39.138 | 0.00 | 0.00 |

ATOM 13491 NE ARG 897 125.230 91.212 41.133 0.00 0.00  
ATOM 13492 HE ARG 897 125.978 91.857 41.347 0.00 0.00  
ATOM 13493 CZ ARG 897 125.012 90.429 42.149 0.00 0.00  
ATOM 13494 NH1 ARG 897 124.378 89.290 42.093 0.00 0.00  
ATOM 13495 1HH1 ARG 897 124.362 88.690 42.905 0.00 0.00  
ATOM 13496 2HH1 ARG 897 123.963 89.010 41.215 0.00 0.00  
ATOM 13497 NH2 ARG 897 125.450 90.812 43.310 0.00 0.00  
ATOM 13498 1HH2 ARG 897 125.048 90.327 44.100 0.00 0.00  
ATOM 13499 2HH2 ARG 897 126.081 91.599 43.360 0.00 0.00  
ATOM 13500 C ARG 897 121.882 95.095 40.155 0.00 0.00  
ATOM 13501 O ARG 897 122.364 95.861 39.304 0.00 0.00  
ATOM 13502 N VAL 898 121.639 95.517 41.422 0.00 0.00  
ATOM 13503 H VAL 898 121.329 94.893 42.154 0.00 0.00  
ATOM 13504 CA VAL 898 121.848 96.897 41.902 0.00 0.00  
ATOM 13505 HA VAL 898 122.540 97.382 41.213 0.00 0.00  
ATOM 13506 CB VAL 898 120.549 97.732 41.897 0.00 0.00  
ATOM 13507 HB VAL 898 120.800 98.723 42.274 0.00 0.00  
ATOM 13508 CG1 VAL 898 119.760 97.866 40.547 0.00 0.00  
ATOM 13509 1HG1 VAL 898 118.792 98.366 40.543 0.00 0.00  
ATOM 13510 2HG1 VAL 898 120.401 98.472 39.905 0.00 0.00  
ATOM 13511 3HG1 VAL 898 119.530 96.919 40.059 0.00 0.00  
ATOM 13512 CG2 VAL 898 119.539 97.214 42.885 0.00 0.00  
ATOM 13513 1HG2 VAL 898 119.973 96.948 43.848 0.00 0.00  
ATOM 13514 2HG2 VAL 898 118.836 98.019 43.101 0.00 0.00  
ATOM 13515 3HG2 VAL 898 119.111 96.284 42.511 0.00 0.00  
ATOM 13516 C VAL 898 122.541 97.074 43.193 0.00 0.00

ATOM 13517 O VAL 898 122.326 96.223 44.055 0.00 0.00  
ATOM 13518 N VAL 899 123.318 98.155 43.364 0.00 0.00  
ATOM 13519 H VAL 899 123.305 98.813 42.597 0.00 0.00  
ATOM 13520 CA VAL 899 123.926 98.538 44.672 0.00 0.00  
ATOM 13521 HA VAL 899 124.082 97.572 45.152 0.00 0.00  
ATOM 13522 CB VAL 899 125.301 99.221 44.531 0.00 0.00  
ATOM 13523 HB VAL 899 125.126 100.056 43.851 0.00 0.00  
ATOM 13524 CG1 VAL 899 125.941 99.710 45.832 0.00 0.00  
ATOM 13525 1HG1 VAL 899 126.764 100.368 45.553 0.00 0.00  
ATOM 13526 2HG1 VAL 899 125.273 100.376 46.378 0.00 0.00  
ATOM 13527 3HG1 VAL 899 126.365 98.907 46.435 0.00 0.00  
ATOM 13528 CG2 VAL 899 126.264 98.209 43.960 0.00 0.00  
ATOM 13529 1HG2 VAL 899 127.333 98.424 43.944 0.00 0.00  
ATOM 13530 2HG2 VAL 899 126.209 97.247 44.470 0.00 0.00  
ATOM 13531 3HG2 VAL 899 125.982 97.939 42.942 0.00 0.00  
ATOM 13532 C VAL 899 123.041 99.401 45.538 0.00 0.00  
ATOM 13533 O VAL 899 122.569 100.407 45.036 0.00 0.00  
ATOM 13534 N VAL 900 122.717 98.972 46.797 0.00 0.00  
ATOM 13535 H VAL 900 123.230 98.173 47.143 0.00 0.00  
ATOM 13536 CA VAL 900 121.694 99.527 47.632 0.00 0.00  
ATOM 13537 HA VAL 900 121.450 100.522 47.260 0.00 0.00  
ATOM 13538 CB VAL 900 120.400 98.690 47.409 0.00 0.00  
ATOM 13539 HB VAL 900 120.173 98.768 46.346 0.00 0.00  
ATOM 13540 CG1 VAL 900 120.618 97.157 47.673 0.00 0.00  
ATOM 13541 1HG1 VAL 900 121.413 96.829 47.003 0.00 0.00  
ATOM 13542 2HG1 VAL 900 120.814 97.139 48.745 0.00 0.00

|      |       |      |     |     |         |         |        |      |      |
|------|-------|------|-----|-----|---------|---------|--------|------|------|
| ATOM | 13543 | 3HG1 | VAL | 900 | 119.776 | 96.466  | 47.673 | 0.00 | 0.00 |
| ATOM | 13544 | CG2  | VAL | 900 | 119.236 | 99.272  | 48.199 | 0.00 | 0.00 |
| ATOM | 13545 | 1HG2 | VAL | 900 | 119.482 | 99.193  | 49.258 | 0.00 | 0.00 |
| ATOM | 13546 | 2HG2 | VAL | 900 | 118.926 | 100.287 | 47.950 | 0.00 | 0.00 |
| ATOM | 13547 | 3HG2 | VAL | 900 | 118.492 | 98.489  | 48.057 | 0.00 | 0.00 |
| ATOM | 13548 | C    | VAL | 900 | 122.150 | 99.689  | 49.062 | 0.00 | 0.00 |
| ATOM | 13549 | O    | VAL | 900 | 122.631 | 98.766  | 49.676 | 0.00 | 0.00 |
| ATOM | 13550 | N    | GLU | 901 | 121.840 | 100.870 | 49.572 | 0.00 | 0.00 |
| ATOM | 13551 | H    | GLU | 901 | 121.335 | 101.547 | 49.020 | 0.00 | 0.00 |
| ATOM | 13552 | CA   | GLU | 901 | 122.151 | 101.230 | 50.966 | 0.00 | 0.00 |
| ATOM | 13553 | HA   | GLU | 901 | 122.442 | 100.297 | 51.448 | 0.00 | 0.00 |
| ATOM | 13554 | CB   | GLU | 901 | 123.226 | 102.373 | 51.072 | 0.00 | 0.00 |
| ATOM | 13555 | HB2  | GLU | 901 | 123.973 | 102.236 | 51.855 | 0.00 | 0.00 |
| ATOM | 13556 | HB3  | GLU | 901 | 123.729 | 102.453 | 50.109 | 0.00 | 0.00 |
| ATOM | 13557 | CG   | GLU | 901 | 122.555 | 103.822 | 51.181 | 0.00 | 0.00 |
| ATOM | 13558 | HG2  | GLU | 901 | 121.831 | 103.935 | 50.375 | 0.00 | 0.00 |
| ATOM | 13559 | HG3  | GLU | 901 | 122.031 | 103.917 | 52.132 | 0.00 | 0.00 |
| ATOM | 13560 | CD   | GLU | 901 | 123.718 | 104.830 | 51.032 | 0.00 | 0.00 |
| ATOM | 13561 | OE1  | GLU | 901 | 123.782 | 105.465 | 49.928 | 0.00 | 0.00 |
| ATOM | 13562 | OE2  | GLU | 901 | 124.486 | 105.014 | 51.974 | 0.00 | 0.00 |
| ATOM | 13563 | C    | GLU | 901 | 120.815 | 101.553 | 51.733 | 0.00 | 0.00 |
| ATOM | 13564 | O    | GLU | 901 | 119.871 | 102.054 | 51.080 | 0.00 | 0.00 |
| ATOM | 13565 | N    | ASN | 902 | 120.759 | 101.388 | 53.058 | 0.00 | 0.00 |
| ATOM | 13566 | H    | ASN | 902 | 121.642 | 101.144 | 53.483 | 0.00 | 0.00 |
| ATOM | 13567 | CA   | ASN | 902 | 119.786 | 102.052 | 53.905 | 0.00 | 0.00 |
| ATOM | 13568 | HA   | ASN | 902 | 118.924 | 102.331 | 53.298 | 0.00 | 0.00 |

ATOM 13569 CB ASN 902 119.260 101.075 55.000 0.00 0.00  
ATOM 13570 HB2 ASN 902 118.977 100.102 54.597 0.00 0.00  
ATOM 13571 HB3 ASN 902 120.041 101.012 55.758 0.00 0.00  
ATOM 13572 CG ASN 902 118.036 101.599 55.723 0.00 0.00  
ATOM 13573 OD1 ASN 902 117.423 102.575 55.343 0.00 0.00  
ATOM 13574 ND2 ASN 902 117.599 100.921 56.760 0.00 0.00  
ATOM 13575 1HD2 ASN 902 116.753 101.160 57.258 0.00 0.00  
ATOM 13576 2HD2 ASN 902 118.117 100.163 57.181 0.00 0.00  
ATOM 13577 C ASN 902 120.345 103.419 54.294 0.00 0.00  
ATOM 13578 O ASN 902 121.353 103.512 55.013 0.00 0.00  
ATOM 13579 N HID 903 119.696 104.489 53.786 0.00 0.00  
ATOM 13580 H HID 903 118.914 104.242 53.198 0.00 0.00  
ATOM 13581 CA HID 903 120.026 105.850 54.059 0.00 0.00  
ATOM 13582 HA HID 903 121.082 105.875 54.327 0.00 0.00  
ATOM 13583 CB HID 903 119.856 106.532 52.686 0.00 0.00  
ATOM 13584 HB2 HID 903 120.519 106.057 51.964 0.00 0.00  
ATOM 13585 HB3 HID 903 118.859 106.287 52.321 0.00 0.00  
ATOM 13586 CG HID 903 120.257 107.933 52.587 0.00 0.00  
ATOM 13587 ND1 HID 903 121.456 108.545 52.892 0.00 0.00  
ATOM 13588 HD1 HID 903 122.214 108.142 53.425 0.00 0.00  
ATOM 13589 CE1 HID 903 121.251 109.894 52.744 0.00 0.00  
ATOM 13590 HE1 HID 903 121.941 110.678 53.019 0.00 0.00  
ATOM 13591 NE2 HID 903 120.022 110.159 52.338 0.00 0.00  
ATOM 13592 CD2 HID 903 119.406 108.946 52.275 0.00 0.00  
ATOM 13593 HD2 HID 903 118.368 108.821 52.003 0.00 0.00  
ATOM 13594 C HID 903 119.099 106.410 55.106 0.00 0.00

ATOM 13595 O HID 903 119.465 107.342 55.871 0.00 0.00  
ATOM 13596 N GLY 904 117.931 105.787 55.384 0.00 0.00  
ATOM 13597 H GLY 904 117.694 104.910 54.941 0.00 0.00  
ATOM 13598 CA GLY 904 117.108 106.151 56.560 0.00 0.00  
ATOM 13599 HA2 GLY 904 116.932 107.227 56.568 0.00 0.00  
ATOM 13600 HA3 GLY 904 116.155 105.628 56.478 0.00 0.00  
ATOM 13601 C GLY 904 117.677 105.729 57.925 0.00 0.00  
ATOM 13602 O GLY 904 118.691 105.088 57.950 0.00 0.00  
ATOM 13603 N ASP 905 116.895 106.019 58.947 0.00 0.00  
ATOM 13604 H ASP 905 116.099 106.635 58.860 0.00 0.00  
ATOM 13605 CA ASP 905 117.427 105.950 60.322 0.00 0.00  
ATOM 13606 HA ASP 905 118.506 106.099 60.279 0.00 0.00  
ATOM 13607 CB ASP 905 116.994 107.233 61.007 0.00 0.00  
ATOM 13608 HB2 ASP 905 117.470 107.403 61.973 0.00 0.00  
ATOM 13609 HB3 ASP 905 117.259 108.097 60.399 0.00 0.00  
ATOM 13610 CG ASP 905 115.475 107.257 61.351 0.00 0.00  
ATOM 13611 OD1 ASP 905 114.719 106.966 60.366 0.00 0.00  
ATOM 13612 OD2 ASP 905 115.106 107.677 62.466 0.00 0.00  
ATOM 13613 C ASP 905 116.899 104.666 61.118 0.00 0.00  
ATOM 13614 O ASP 905 117.039 104.650 62.327 0.00 0.00  
ATOM 13615 N ARG 906 116.198 103.739 60.439 0.00 0.00  
ATOM 13616 H ARG 906 116.237 103.881 59.440 0.00 0.00  
ATOM 13617 CA ARG 906 115.379 102.592 61.065 0.00 0.00  
ATOM 13618 HA ARG 906 115.732 102.485 62.091 0.00 0.00  
ATOM 13619 CB ARG 906 113.916 103.088 61.108 0.00 0.00  
ATOM 13620 HB2 ARG 906 113.755 103.857 60.353 0.00 0.00

|      |       |      |     |     |         |         |        |      |      |
|------|-------|------|-----|-----|---------|---------|--------|------|------|
| ATOM | 13621 | HB3  | ARG | 906 | 113.136 | 102.338 | 60.971 | 0.00 | 0.00 |
| ATOM | 13622 | CG   | ARG | 906 | 113.635 | 103.850 | 62.421 | 0.00 | 0.00 |
| ATOM | 13623 | HG2  | ARG | 906 | 113.655 | 103.146 | 63.253 | 0.00 | 0.00 |
| ATOM | 13624 | HG3  | ARG | 906 | 114.415 | 104.580 | 62.637 | 0.00 | 0.00 |
| ATOM | 13625 | CD   | ARG | 906 | 112.300 | 104.610 | 62.363 | 0.00 | 0.00 |
| ATOM | 13626 | HD2  | ARG | 906 | 111.415 | 104.053 | 62.053 | 0.00 | 0.00 |
| ATOM | 13627 | HD3  | ARG | 906 | 112.116 | 104.938 | 63.387 | 0.00 | 0.00 |
| ATOM | 13628 | NE   | ARG | 906 | 112.401 | 105.765 | 61.487 | 0.00 | 0.00 |
| ATOM | 13629 | HE   | ARG | 906 | 113.357 | 106.011 | 61.272 | 0.00 | 0.00 |
| ATOM | 13630 | CZ   | ARG | 906 | 111.465 | 106.486 | 61.113 | 0.00 | 0.00 |
| ATOM | 13631 | NH1  | ARG | 906 | 110.194 | 106.257 | 61.299 | 0.00 | 0.00 |
| ATOM | 13632 | 1HH1 | ARG | 906 | 109.485 | 106.861 | 60.909 | 0.00 | 0.00 |
| ATOM | 13633 | 2HH1 | ARG | 906 | 109.938 | 105.406 | 61.779 | 0.00 | 0.00 |
| ATOM | 13634 | NH2  | ARG | 906 | 111.837 | 107.549 | 60.412 | 0.00 | 0.00 |
| ATOM | 13635 | 1HH2 | ARG | 906 | 111.048 | 108.090 | 60.087 | 0.00 | 0.00 |
| ATOM | 13636 | 2HH2 | ARG | 906 | 112.800 | 107.737 | 60.175 | 0.00 | 0.00 |
| ATOM | 13637 | C    | ARG | 906 | 115.601 | 101.379 | 60.192 | 0.00 | 0.00 |
| ATOM | 13638 | O    | ARG | 906 | 116.061 | 101.438 | 59.012 | 0.00 | 0.00 |
| ATOM | 13639 | N    | PRO | 907 | 115.290 | 100.228 | 60.733 | 0.00 | 0.00 |
| ATOM | 13640 | CD   | PRO | 907 | 114.736 | 100.107 | 62.030 | 0.00 | 0.00 |
| ATOM | 13641 | HD2  | PRO | 907 | 115.382 | 100.504 | 62.813 | 0.00 | 0.00 |
| ATOM | 13642 | HD3  | PRO | 907 | 113.805 | 100.660 | 62.156 | 0.00 | 0.00 |
| ATOM | 13643 | CG   | PRO | 907 | 114.460 | 98.661  | 62.337 | 0.00 | 0.00 |
| ATOM | 13644 | HG2  | PRO | 907 | 114.871 | 98.321  | 63.288 | 0.00 | 0.00 |
| ATOM | 13645 | HG3  | PRO | 907 | 113.431 | 98.354  | 62.153 | 0.00 | 0.00 |
| ATOM | 13646 | CB   | PRO | 907 | 115.407 | 97.990  | 61.310 | 0.00 | 0.00 |



|      |       |          |     |         |         |        |      |      |
|------|-------|----------|-----|---------|---------|--------|------|------|
| ATOM | 13647 | HB2 PRO  | 907 | 116.410 | 97.944  | 61.734 | 0.00 | 0.00 |
| ATOM | 13648 | HB3 PRO  | 907 | 115.161 | 96.970  | 61.013 | 0.00 | 0.00 |
| ATOM | 13649 | CA PRO   | 907 | 115.340 | 98.895  | 60.080 | 0.00 | 0.00 |
| ATOM | 13650 | HA PRO   | 907 | 116.340 | 98.896  | 59.646 | 0.00 | 0.00 |
| ATOM | 13651 | C PRO    | 907 | 114.278 | 98.545  | 59.068 | 0.00 | 0.00 |
| ATOM | 13652 | O PRO    | 907 | 113.125 | 98.994  | 59.077 | 0.00 | 0.00 |
| ATOM | 13653 | N ILE    | 908 | 114.755 | 97.696  | 58.128 | 0.00 | 0.00 |
| ATOM | 13654 | H ILE    | 908 | 115.756 | 97.608  | 58.233 | 0.00 | 0.00 |
| ATOM | 13655 | CA ILE   | 908 | 114.030 | 97.276  | 56.926 | 0.00 | 0.00 |
| ATOM | 13656 | HA ILE   | 908 | 112.973 | 97.493  | 57.076 | 0.00 | 0.00 |
| ATOM | 13657 | CB ILE   | 908 | 114.508 | 98.200  | 55.774 | 0.00 | 0.00 |
| ATOM | 13658 | HB ILE   | 908 | 115.580 | 98.140  | 55.590 | 0.00 | 0.00 |
| ATOM | 13659 | CG2 ILE  | 908 | 113.819 | 97.729  | 54.442 | 0.00 | 0.00 |
| ATOM | 13660 | 1HG2 ILE | 908 | 114.283 | 96.786  | 54.152 | 0.00 | 0.00 |
| ATOM | 13661 | 2HG2 ILE | 908 | 112.765 | 97.615  | 54.694 | 0.00 | 0.00 |
| ATOM | 13662 | 3HG2 ILE | 908 | 114.221 | 98.329  | 53.626 | 0.00 | 0.00 |
| ATOM | 13663 | CG1 ILE  | 908 | 114.096 | 99.659  | 56.050 | 0.00 | 0.00 |
| ATOM | 13664 | 2HG1 ILE | 908 | 113.023 | 99.598  | 56.234 | 0.00 | 0.00 |
| ATOM | 13665 | 3HG1 ILE | 908 | 114.580 | 100.131 | 56.905 | 0.00 | 0.00 |
| ATOM | 13666 | CD1 ILE  | 908 | 114.555 | 100.657 | 54.953 | 0.00 | 0.00 |
| ATOM | 13667 | 1HD1 ILE | 908 | 114.084 | 100.467 | 53.989 | 0.00 | 0.00 |
| ATOM | 13668 | 2HD1 ILE | 908 | 114.151 | 101.594 | 55.336 | 0.00 | 0.00 |
| ATOM | 13669 | 3HD1 ILE | 908 | 115.624 | 100.508 | 54.801 | 0.00 | 0.00 |
| ATOM | 13670 | C ILE    | 908 | 114.179 | 95.795  | 56.546 | 0.00 | 0.00 |
| ATOM | 13671 | O ILE    | 908 | 115.292 | 95.281  | 56.463 | 0.00 | 0.00 |
| ATOM | 13672 | N GLN    | 909 | 113.042 | 95.133  | 56.247 | 0.00 | 0.00 |

ATOM 13673 H GLN 909 112.118 95.508 56.407 0.00 0.00  
ATOM 13674 CA GLN 909 113.124 93.773 55.655 0.00 0.00  
ATOM 13675 HA GLN 909 114.113 93.672 55.209 0.00 0.00  
ATOM 13676 CB GLN 909 112.974 92.629 56.672 0.00 0.00  
ATOM 13677 HB2 GLN 909 113.459 92.929 57.601 0.00 0.00  
ATOM 13678 HB3 GLN 909 111.991 92.261 56.965 0.00 0.00  
ATOM 13679 CG GLN 909 113.799 91.365 56.265 0.00 0.00  
ATOM 13680 HG2 GLN 909 113.274 90.948 55.405 0.00 0.00  
ATOM 13681 HG3 GLN 909 114.786 91.731 55.982 0.00 0.00  
ATOM 13682 CD GLN 909 114.000 90.314 57.343 0.00 0.00  
ATOM 13683 OE1 GLN 909 113.630 90.382 58.539 0.00 0.00  
ATOM 13684 NE2 GLN 909 114.820 89.285 57.156 0.00 0.00  
ATOM 13685 1HE2 GLN 909 114.940 88.728 57.990 0.00 0.00  
ATOM 13686 2HE2 GLN 909 115.328 89.171 56.290 0.00 0.00  
ATOM 13687 C GLN 909 112.188 93.644 54.473 0.00 0.00  
ATOM 13688 O GLN 909 111.045 94.054 54.660 0.00 0.00  
ATOM 13689 N VAL 910 112.588 93.041 53.356 0.00 0.00  
ATOM 13690 H VAL 910 113.523 92.659 53.342 0.00 0.00  
ATOM 13691 CA VAL 910 111.926 93.172 52.098 0.00 0.00  
ATOM 13692 HA VAL 910 110.915 93.528 52.295 0.00 0.00  
ATOM 13693 CB VAL 910 112.671 94.205 51.170 0.00 0.00  
ATOM 13694 HB VAL 910 113.722 93.961 51.018 0.00 0.00  
ATOM 13695 CG1 VAL 910 111.954 94.301 49.814 0.00 0.00  
ATOM 13696 1HG1 VAL 910 112.492 95.014 49.189 0.00 0.00  
ATOM 13697 2HG1 VAL 910 112.171 93.354 49.320 0.00 0.00  
ATOM 13698 3HG1 VAL 910 110.906 94.577 49.924 0.00 0.00

ATOM 13699 CG2 VAL 910 112.492 95.594 51.691 0.00 0.00  
ATOM 13700 1HG2 VAL 910 113.099 95.775 52.578 0.00 0.00  
ATOM 13701 2HG2 VAL 910 112.898 96.320 50.987 0.00 0.00  
ATOM 13702 3HG2 VAL 910 111.464 95.955 51.685 0.00 0.00  
ATOM 13703 C VAL 910 111.851 91.896 51.388 0.00 0.00  
ATOM 13704 O VAL 910 112.898 91.338 51.089 0.00 0.00  
ATOM 13705 N GLY 911 110.647 91.358 51.205 0.00 0.00  
ATOM 13706 H GLY 911 109.922 91.913 51.636 0.00 0.00  
ATOM 13707 CA GLY 911 110.424 89.999 50.769 0.00 0.00  
ATOM 13708 HA2 GLY 911 111.097 89.307 51.275 0.00 0.00  
ATOM 13709 HA3 GLY 911 109.391 89.699 50.943 0.00 0.00  
ATOM 13710 C GLY 911 110.570 89.836 49.244 0.00 0.00  
ATOM 13711 O GLY 911 110.595 90.819 48.466 0.00 0.00  
ATOM 13712 N SER 912 110.750 88.572 48.867 0.00 0.00  
ATOM 13713 H SER 912 110.686 87.812 49.530 0.00 0.00  
ATOM 13714 CA SER 912 111.100 88.037 47.489 0.00 0.00  
ATOM 13715 HA SER 912 112.164 88.183 47.301 0.00 0.00  
ATOM 13716 CB SER 912 110.973 86.480 47.373 0.00 0.00  
ATOM 13717 HB2 SER 912 111.162 86.177 46.343 0.00 0.00  
ATOM 13718 HB3 SER 912 111.720 85.974 47.985 0.00 0.00  
ATOM 13719 OG SER 912 109.716 86.083 47.677 0.00 0.00  
ATOM 13720 HG SER 912 109.084 86.471 47.068 0.00 0.00  
ATOM 13721 C SER 912 110.312 88.749 46.307 0.00 0.00  
ATOM 13722 O SER 912 110.851 89.266 45.301 0.00 0.00  
ATOM 13723 N HIE 913 109.052 88.987 46.590 0.00 0.00  
ATOM 13724 H HIE 913 108.739 88.744 47.518 0.00 0.00

|      |       |     |     |     |         |        |        |      |      |
|------|-------|-----|-----|-----|---------|--------|--------|------|------|
| ATOM | 13725 | CA  | HIE | 913 | 108.070 | 89.402 | 45.552 | 0.00 | 0.00 |
| ATOM | 13726 | HA  | HIE | 913 | 108.594 | 89.265 | 44.606 | 0.00 | 0.00 |
| ATOM | 13727 | CB  | HIE | 913 | 106.845 | 88.424 | 45.565 | 0.00 | 0.00 |
| ATOM | 13728 | HB2 | HIE | 913 | 106.493 | 88.274 | 46.586 | 0.00 | 0.00 |
| ATOM | 13729 | HB3 | HIE | 913 | 106.019 | 88.906 | 45.042 | 0.00 | 0.00 |
| ATOM | 13730 | CG  | HIE | 913 | 107.104 | 87.087 | 44.855 | 0.00 | 0.00 |
| ATOM | 13731 | ND1 | HIE | 913 | 108.057 | 86.103 | 45.186 | 0.00 | 0.00 |
| ATOM | 13732 | CE1 | HIE | 913 | 107.930 | 85.140 | 44.283 | 0.00 | 0.00 |
| ATOM | 13733 | HE1 | HIE | 913 | 108.575 | 84.275 | 44.262 | 0.00 | 0.00 |
| ATOM | 13734 | NE2 | HIE | 913 | 107.143 | 85.571 | 43.273 | 0.00 | 0.00 |
| ATOM | 13735 | HE2 | HIE | 913 | 106.993 | 85.064 | 42.412 | 0.00 | 0.00 |
| ATOM | 13736 | CD2 | HIE | 913 | 106.640 | 86.813 | 43.569 | 0.00 | 0.00 |
| ATOM | 13737 | HD2 | HIE | 913 | 106.015 | 87.419 | 42.929 | 0.00 | 0.00 |
| ATOM | 13738 | C   | HIE | 913 | 107.751 | 90.938 | 45.723 | 0.00 | 0.00 |
| ATOM | 13739 | O   | HIE | 913 | 106.652 | 91.412 | 45.368 | 0.00 | 0.00 |
| ATOM | 13740 | N   | TYR | 914 | 108.612 | 91.768 | 46.316 | 0.00 | 0.00 |
| ATOM | 13741 | H   | TYR | 914 | 109.570 | 91.484 | 46.458 | 0.00 | 0.00 |
| ATOM | 13742 | CA  | TYR | 914 | 108.454 | 93.225 | 46.260 | 0.00 | 0.00 |
| ATOM | 13743 | HA  | TYR | 914 | 107.367 | 93.305 | 46.247 | 0.00 | 0.00 |
| ATOM | 13744 | CB  | TYR | 914 | 108.917 | 94.012 | 47.475 | 0.00 | 0.00 |
| ATOM | 13745 | HB2 | TYR | 914 | 108.869 | 93.357 | 48.345 | 0.00 | 0.00 |
| ATOM | 13746 | HB3 | TYR | 914 | 109.954 | 94.319 | 47.338 | 0.00 | 0.00 |
| ATOM | 13747 | CG  | TYR | 914 | 107.959 | 95.139 | 47.810 | 0.00 | 0.00 |
| ATOM | 13748 | CD1 | TYR | 914 | 106.828 | 94.903 | 48.657 | 0.00 | 0.00 |
| ATOM | 13749 | HD1 | TYR | 914 | 106.825 | 93.980 | 49.218 | 0.00 | 0.00 |
| ATOM | 13750 | CE1 | TYR | 914 | 105.786 | 95.840 | 48.815 | 0.00 | 0.00 |

ATOM 13751 HE1 TYR 914 105.055 95.522 49.543 0.00 0.00  
ATOM 13752 CZ TYR 914 105.918 97.099 48.087 0.00 0.00  
ATOM 13753 OH TYR 914 104.946 98.033 48.101 0.00 0.00  
ATOM 13754 HH TYR 914 104.323 97.853 48.809 0.00 0.00  
ATOM 13755 CE2 TYR 914 107.016 97.265 47.190 0.00 0.00  
ATOM 13756 HE2 TYR 914 106.977 98.221 46.688 0.00 0.00  
ATOM 13757 CD2 TYR 914 108.013 96.328 47.038 0.00 0.00  
ATOM 13758 HD2 TYR 914 108.830 96.474 46.347 0.00 0.00  
ATOM 13759 C TYR 914 109.092 93.851 45.012 0.00 0.00  
ATOM 13760 O TYR 914 110.294 93.513 44.700 0.00 0.00  
ATOM 13761 N HID 915 108.342 94.650 44.245 0.00 0.00  
ATOM 13762 H HID 915 107.364 94.805 44.445 0.00 0.00  
ATOM 13763 CA HID 915 108.838 95.385 43.028 0.00 0.00  
ATOM 13764 HA HID 915 109.123 94.757 42.184 0.00 0.00  
ATOM 13765 CB HID 915 107.581 96.276 42.669 0.00 0.00  
ATOM 13766 HB2 HID 915 106.700 95.646 42.551 0.00 0.00  
ATOM 13767 HB3 HID 915 107.518 96.961 43.515 0.00 0.00  
ATOM 13768 CG HID 915 107.717 97.105 41.423 0.00 0.00  
ATOM 13769 ND1 HID 915 106.999 98.272 41.155 0.00 0.00  
ATOM 13770 HD1 HID 915 106.200 98.564 41.699 0.00 0.00  
ATOM 13771 CE1 HID 915 107.483 98.940 40.062 0.00 0.00  
ATOM 13772 HE1 HID 915 106.819 99.579 39.500 0.00 0.00  
ATOM 13773 NE2 HID 915 108.402 98.132 39.523 0.00 0.00  
ATOM 13774 CD2 HID 915 108.552 97.017 40.355 0.00 0.00  
ATOM 13775 HD2 HID 915 109.299 96.254 40.194 0.00 0.00  
ATOM 13776 C HID 915 110.020 96.203 43.432 0.00 0.00

|      |       |     |     |     |         |         |        |      |      |
|------|-------|-----|-----|-----|---------|---------|--------|------|------|
| ATOM | 13777 | O   | HID | 915 | 109.814 | 97.217  | 44.073 | 0.00 | 0.00 |
| ATOM | 13778 | N   | PHE | 916 | 111.267 | 95.800  | 43.135 | 0.00 | 0.00 |
| ATOM | 13779 | H   | PHE | 916 | 111.430 | 94.925  | 42.657 | 0.00 | 0.00 |
| ATOM | 13780 | CA  | PHE | 916 | 112.459 | 96.418  | 43.715 | 0.00 | 0.00 |
| ATOM | 13781 | HA  | PHE | 916 | 112.211 | 96.450  | 44.776 | 0.00 | 0.00 |
| ATOM | 13782 | CB  | PHE | 916 | 113.744 | 95.630  | 43.678 | 0.00 | 0.00 |
| ATOM | 13783 | HB2 | PHE | 916 | 114.237 | 95.763  | 42.715 | 0.00 | 0.00 |
| ATOM | 13784 | HB3 | PHE | 916 | 113.430 | 94.587  | 43.663 | 0.00 | 0.00 |
| ATOM | 13785 | CG  | PHE | 916 | 114.720 | 95.854  | 44.784 | 0.00 | 0.00 |
| ATOM | 13786 | CD1 | PHE | 916 | 114.458 | 95.302  | 46.075 | 0.00 | 0.00 |
| ATOM | 13787 | HD1 | PHE | 916 | 113.575 | 94.693  | 46.203 | 0.00 | 0.00 |
| ATOM | 13788 | CE1 | PHE | 916 | 115.322 | 95.458  | 47.182 | 0.00 | 0.00 |
| ATOM | 13789 | HE1 | PHE | 916 | 115.000 | 95.241  | 48.190 | 0.00 | 0.00 |
| ATOM | 13790 | CZ  | PHE | 916 | 116.549 | 96.146  | 47.004 | 0.00 | 0.00 |
| ATOM | 13791 | HZ  | PHE | 916 | 117.247 | 96.279  | 47.817 | 0.00 | 0.00 |
| ATOM | 13792 | CE2 | PHE | 916 | 116.767 | 96.689  | 45.741 | 0.00 | 0.00 |
| ATOM | 13793 | HE2 | PHE | 916 | 117.563 | 97.411  | 45.634 | 0.00 | 0.00 |
| ATOM | 13794 | CD2 | PHE | 916 | 115.915 | 96.537  | 44.647 | 0.00 | 0.00 |
| ATOM | 13795 | HD2 | PHE | 916 | 116.141 | 97.152  | 43.789 | 0.00 | 0.00 |
| ATOM | 13796 | C   | PHE | 916 | 112.523 | 97.977  | 43.463 | 0.00 | 0.00 |
| ATOM | 13797 | O   | PHE | 916 | 113.001 | 98.742  | 44.306 | 0.00 | 0.00 |
| ATOM | 13798 | N   | ALA | 917 | 111.893 | 98.506  | 42.396 | 0.00 | 0.00 |
| ATOM | 13799 | H   | ALA | 917 | 111.722 | 97.869  | 41.631 | 0.00 | 0.00 |
| ATOM | 13800 | CA  | ALA | 917 | 111.722 | 99.909  | 42.076 | 0.00 | 0.00 |
| ATOM | 13801 | HA  | ALA | 917 | 112.636 | 100.493 | 41.968 | 0.00 | 0.00 |
| ATOM | 13802 | CB  | ALA | 917 | 110.995 | 100.034 | 40.768 | 0.00 | 0.00 |

|      |       |     |     |     |         |         |        |      |      |
|------|-------|-----|-----|-----|---------|---------|--------|------|------|
| ATOM | 13803 | HB1 | ALA | 917 | 110.623 | 101.040 | 40.569 | 0.00 | 0.00 |
| ATOM | 13804 | HB2 | ALA | 917 | 111.593 | 99.836  | 39.878 | 0.00 | 0.00 |
| ATOM | 13805 | HB3 | ALA | 917 | 110.132 | 99.371  | 40.833 | 0.00 | 0.00 |
| ATOM | 13806 | C   | ALA | 917 | 110.816 | 100.621 | 43.115 | 0.00 | 0.00 |
| ATOM | 13807 | O   | ALA | 917 | 111.088 | 101.760 | 43.302 | 0.00 | 0.00 |
| ATOM | 13808 | N   | GLU | 918 | 109.921 | 99.926  | 43.844 | 0.00 | 0.00 |
| ATOM | 13809 | H   | GLU | 918 | 109.729 | 99.001  | 43.487 | 0.00 | 0.00 |
| ATOM | 13810 | CA  | GLU | 918 | 109.034 | 100.591 | 44.816 | 0.00 | 0.00 |
| ATOM | 13811 | HA  | GLU | 918 | 109.329 | 101.632 | 44.954 | 0.00 | 0.00 |
| ATOM | 13812 | CB  | GLU | 918 | 107.632 | 100.517 | 44.278 | 0.00 | 0.00 |
| ATOM | 13813 | HB2 | GLU | 918 | 107.389 | 99.461  | 44.157 | 0.00 | 0.00 |
| ATOM | 13814 | HB3 | GLU | 918 | 106.902 | 100.954 | 44.958 | 0.00 | 0.00 |
| ATOM | 13815 | CG  | GLU | 918 | 107.560 | 101.338 | 42.990 | 0.00 | 0.00 |
| ATOM | 13816 | HG2 | GLU | 918 | 107.941 | 102.324 | 43.258 | 0.00 | 0.00 |
| ATOM | 13817 | HG3 | GLU | 918 | 108.171 | 100.885 | 42.210 | 0.00 | 0.00 |
| ATOM | 13818 | CD  | GLU | 918 | 106.128 | 101.349 | 42.376 | 0.00 | 0.00 |
| ATOM | 13819 | OE1 | GLU | 918 | 105.986 | 101.501 | 41.086 | 0.00 | 0.00 |
| ATOM | 13820 | OE2 | GLU | 918 | 105.099 | 101.148 | 43.101 | 0.00 | 0.00 |
| ATOM | 13821 | C   | GLU | 918 | 109.110 | 100.055 | 46.315 | 0.00 | 0.00 |
| ATOM | 13822 | O   | GLU | 918 | 108.191 | 100.200 | 47.062 | 0.00 | 0.00 |
| ATOM | 13823 | N   | VAL | 919 | 110.229 | 99.367  | 46.672 | 0.00 | 0.00 |
| ATOM | 13824 | H   | VAL | 919 | 110.785 | 98.866  | 45.993 | 0.00 | 0.00 |
| ATOM | 13825 | CA  | VAL | 919 | 110.626 | 99.167  | 48.111 | 0.00 | 0.00 |
| ATOM | 13826 | HA  | VAL | 919 | 109.781 | 98.706  | 48.624 | 0.00 | 0.00 |
| ATOM | 13827 | CB  | VAL | 919 | 111.806 | 98.180  | 48.131 | 0.00 | 0.00 |
| ATOM | 13828 | HB  | VAL | 919 | 112.056 | 97.953  | 49.167 | 0.00 | 0.00 |

ATOM 13829 CG1 VAL 919 111.449 96.824 47.457 0.00 0.00  
ATOM 13830 1HG1 VAL 919 111.088 97.047 46.453 0.00 0.00  
ATOM 13831 2HG1 VAL 919 112.299 96.142 47.443 0.00 0.00  
ATOM 13832 3HG1 VAL 919 110.611 96.324 47.942 0.00 0.00  
ATOM 13833 CG2 VAL 919 113.024 98.907 47.442 0.00 0.00  
ATOM 13834 1HG2 VAL 919 113.800 98.146 47.360 0.00 0.00  
ATOM 13835 2HG2 VAL 919 112.737 99.244 46.446 0.00 0.00  
ATOM 13836 3HG2 VAL 919 113.381 99.659 48.145 0.00 0.00  
ATOM 13837 C VAL 919 110.903 100.504 48.862 0.00 0.00  
ATOM 13838 O VAL 919 111.333 101.460 48.245 0.00 0.00  
ATOM 13839 N ASN 920 110.725 100.547 50.216 0.00 0.00  
ATOM 13840 H ASN 920 110.299 99.673 50.487 0.00 0.00  
ATOM 13841 CA ASN 920 110.824 101.743 51.040 0.00 0.00  
ATOM 13842 HA ASN 920 109.870 102.248 51.187 0.00 0.00  
ATOM 13843 CB ASN 920 111.263 101.212 52.426 0.00 0.00  
ATOM 13844 HB2 ASN 920 110.600 100.399 52.723 0.00 0.00  
ATOM 13845 HB3 ASN 920 112.252 100.782 52.269 0.00 0.00  
ATOM 13846 CG ASN 920 111.416 102.306 53.493 0.00 0.00  
ATOM 13847 OD1 ASN 920 111.515 103.464 53.208 0.00 0.00  
ATOM 13848 ND2 ASN 920 111.360 101.968 54.718 0.00 0.00  
ATOM 13849 1HD2 ASN 920 111.408 102.717 55.394 0.00 0.00  
ATOM 13850 2HD2 ASN 920 111.081 101.036 54.990 0.00 0.00  
ATOM 13851 C ASN 920 111.805 102.795 50.500 0.00 0.00  
ATOM 13852 O ASN 920 113.018 102.519 50.355 0.00 0.00  
ATOM 13853 N PRO 921 111.429 104.057 50.173 0.00 0.00  
ATOM 13854 CD PRO 921 110.058 104.510 50.131 0.00 0.00



|      |       |         |     |         |         |        |      |      |
|------|-------|---------|-----|---------|---------|--------|------|------|
| ATOM | 13855 | HD2 PRO | 921 | 109.452 | 103.832 | 49.530 | 0.00 | 0.00 |
| ATOM | 13856 | HD3 PRO | 921 | 109.659 | 104.414 | 51.141 | 0.00 | 0.00 |
| ATOM | 13857 | CG PRO  | 921 | 110.159 | 105.881 | 49.494 | 0.00 | 0.00 |
| ATOM | 13858 | HG2 PRO | 921 | 110.037 | 105.920 | 48.411 | 0.00 | 0.00 |
| ATOM | 13859 | HG3 PRO | 921 | 109.407 | 106.583 | 49.851 | 0.00 | 0.00 |
| ATOM | 13860 | CB PRO  | 921 | 111.499 | 106.372 | 49.959 | 0.00 | 0.00 |
| ATOM | 13861 | HB2 PRO | 921 | 111.786 | 107.227 | 49.346 | 0.00 | 0.00 |
| ATOM | 13862 | HB3 PRO | 921 | 111.394 | 106.643 | 51.009 | 0.00 | 0.00 |
| ATOM | 13863 | CA PRO  | 921 | 112.334 | 105.157 | 49.683 | 0.00 | 0.00 |
| ATOM | 13864 | HA PRO  | 921 | 112.517 | 104.976 | 48.624 | 0.00 | 0.00 |
| ATOM | 13865 | C PRO   | 921 | 113.741 | 105.284 | 50.391 | 0.00 | 0.00 |
| ATOM | 13866 | O PRO   | 921 | 114.769 | 105.517 | 49.734 | 0.00 | 0.00 |
| ATOM | 13867 | N ALA   | 922 | 113.784 | 104.988 | 51.678 | 0.00 | 0.00 |
| ATOM | 13868 | H ALA   | 922 | 113.013 | 104.479 | 52.086 | 0.00 | 0.00 |
| ATOM | 13869 | CA ALA  | 922 | 115.065 | 104.845 | 52.436 | 0.00 | 0.00 |
| ATOM | 13870 | HA ALA  | 922 | 115.488 | 105.847 | 52.502 | 0.00 | 0.00 |
| ATOM | 13871 | CB ALA  | 922 | 114.595 | 104.482 | 53.835 | 0.00 | 0.00 |
| ATOM | 13872 | HB1 ALA | 922 | 115.420 | 104.768 | 54.488 | 0.00 | 0.00 |
| ATOM | 13873 | HB2 ALA | 922 | 113.653 | 104.938 | 54.139 | 0.00 | 0.00 |
| ATOM | 13874 | HB3 ALA | 922 | 114.542 | 103.394 | 53.872 | 0.00 | 0.00 |
| ATOM | 13875 | C ALA   | 922 | 116.128 | 103.845 | 51.911 | 0.00 | 0.00 |
| ATOM | 13876 | O ALA   | 922 | 117.288 | 103.921 | 52.274 | 0.00 | 0.00 |
| ATOM | 13877 | N LEU   | 923 | 115.724 | 102.914 | 51.034 | 0.00 | 0.00 |
| ATOM | 13878 | H LEU   | 923 | 114.724 | 102.820 | 50.924 | 0.00 | 0.00 |
| ATOM | 13879 | CA LEU  | 923 | 116.627 | 101.992 | 50.305 | 0.00 | 0.00 |
| ATOM | 13880 | HA LEU  | 923 | 117.506 | 101.800 | 50.920 | 0.00 | 0.00 |

ATOM 13881 CB LEU 923 116.050 100.572 50.041 0.00 0.00  
ATOM 13882 HB2 LEU 923 115.252 100.621 49.300 0.00 0.00  
ATOM 13883 HB3 LEU 923 116.788 99.989 49.491 0.00 0.00  
ATOM 13884 CG LEU 923 115.633 99.683 51.262 0.00 0.00  
ATOM 13885 HG LEU 923 114.845 100.106 51.885 0.00 0.00  
ATOM 13886 CD1 LEU 923 115.112 98.314 50.756 0.00 0.00  
ATOM 13887 1HD1 LEU 923 114.034 98.439 50.654 0.00 0.00  
ATOM 13888 2HD1 LEU 923 115.531 98.162 49.761 0.00 0.00  
ATOM 13889 3HD1 LEU 923 115.222 97.497 51.469 0.00 0.00  
ATOM 13890 CD2 LEU 923 116.779 99.414 52.244 0.00 0.00  
ATOM 13891 1HD2 LEU 923 116.518 98.734 53.055 0.00 0.00  
ATOM 13892 2HD2 LEU 923 117.647 99.143 51.643 0.00 0.00  
ATOM 13893 3HD2 LEU 923 117.173 100.299 52.742 0.00 0.00  
ATOM 13894 C LEU 923 117.039 102.743 49.032 0.00 0.00  
ATOM 13895 O LEU 923 116.299 102.854 48.028 0.00 0.00  
ATOM 13896 N LYS 924 118.214 103.340 49.030 0.00 0.00  
ATOM 13897 H LYS 924 118.818 103.124 49.809 0.00 0.00  
ATOM 13898 CA LYS 924 118.679 104.349 48.080 0.00 0.00  
ATOM 13899 HA LYS 924 117.847 104.833 47.569 0.00 0.00  
ATOM 13900 CB LYS 924 119.274 105.388 48.962 0.00 0.00  
ATOM 13901 HB2 LYS 924 118.517 105.629 49.708 0.00 0.00  
ATOM 13902 HB3 LYS 924 120.192 105.054 49.444 0.00 0.00  
ATOM 13903 CG LYS 924 119.580 106.541 48.026 0.00 0.00  
ATOM 13904 HG2 LYS 924 120.406 106.370 47.337 0.00 0.00  
ATOM 13905 HG3 LYS 924 118.668 106.842 47.510 0.00 0.00  
ATOM 13906 CD LYS 924 119.975 107.776 48.860 0.00 0.00

|      |       |     |     |     |         |         |        |      |      |
|------|-------|-----|-----|-----|---------|---------|--------|------|------|
| ATOM | 13907 | HD2 | LYS | 924 | 119.181 | 107.965 | 49.583 | 0.00 | 0.00 |
| ATOM | 13908 | HD3 | LYS | 924 | 120.968 | 107.465 | 49.184 | 0.00 | 0.00 |
| ATOM | 13909 | CE  | LYS | 924 | 120.103 | 109.052 | 47.894 | 0.00 | 0.00 |
| ATOM | 13910 | HE2 | LYS | 924 | 121.012 | 108.929 | 47.306 | 0.00 | 0.00 |
| ATOM | 13911 | HE3 | LYS | 924 | 119.223 | 108.995 | 47.253 | 0.00 | 0.00 |
| ATOM | 13912 | NZ  | LYS | 924 | 120.246 | 110.250 | 48.630 | 0.00 | 0.00 |
| ATOM | 13913 | HZ1 | LYS | 924 | 119.501 | 110.339 | 49.306 | 0.00 | 0.00 |
| ATOM | 13914 | HZ2 | LYS | 924 | 121.123 | 110.261 | 49.129 | 0.00 | 0.00 |
| ATOM | 13915 | HZ3 | LYS | 924 | 120.319 | 111.042 | 48.008 | 0.00 | 0.00 |
| ATOM | 13916 | C   | LYS | 924 | 119.457 | 103.736 | 46.893 | 0.00 | 0.00 |
| ATOM | 13917 | O   | LYS | 924 | 120.540 | 103.228 | 47.091 | 0.00 | 0.00 |
| ATOM | 13918 | N   | PHE | 925 | 118.870 | 103.682 | 45.734 | 0.00 | 0.00 |
| ATOM | 13919 | H   | PHE | 925 | 118.034 | 104.239 | 45.632 | 0.00 | 0.00 |
| ATOM | 13920 | CA  | PHE | 925 | 119.383 | 103.167 | 44.435 | 0.00 | 0.00 |
| ATOM | 13921 | HA  | PHE | 925 | 120.403 | 103.544 | 44.355 | 0.00 | 0.00 |
| ATOM | 13922 | CB  | PHE | 925 | 119.446 | 101.602 | 44.408 | 0.00 | 0.00 |
| ATOM | 13923 | HB2 | PHE | 925 | 120.322 | 101.260 | 43.857 | 0.00 | 0.00 |
| ATOM | 13924 | HB3 | PHE | 925 | 119.589 | 101.168 | 45.398 | 0.00 | 0.00 |
| ATOM | 13925 | CG  | PHE | 925 | 118.203 | 100.887 | 43.959 | 0.00 | 0.00 |
| ATOM | 13926 | CD1 | PHE | 925 | 117.905 | 100.658 | 42.610 | 0.00 | 0.00 |
| ATOM | 13927 | HD1 | PHE | 925 | 118.596 | 101.133 | 41.930 | 0.00 | 0.00 |
| ATOM | 13928 | CE1 | PHE | 925 | 116.783 | 100.002 | 42.119 | 0.00 | 0.00 |
| ATOM | 13929 | HE1 | PHE | 925 | 116.772 | 99.763  | 41.066 | 0.00 | 0.00 |
| ATOM | 13930 | CZ  | PHE | 925 | 115.849 | 99.676  | 43.071 | 0.00 | 0.00 |
| ATOM | 13931 | HZ  | PHE | 925 | 115.087 | 98.958  | 42.806 | 0.00 | 0.00 |
| ATOM | 13932 | CE2 | PHE | 925 | 116.067 | 99.854  | 44.469 | 0.00 | 0.00 |

|      |       |     |     |     |         |         |        |      |      |
|------|-------|-----|-----|-----|---------|---------|--------|------|------|
| ATOM | 13933 | HE2 | PHE | 925 | 115.332 | 99.416  | 45.127 | 0.00 | 0.00 |
| ATOM | 13934 | CD2 | PHE | 925 | 117.194 | 100.473 | 44.875 | 0.00 | 0.00 |
| ATOM | 13935 | HD2 | PHE | 925 | 117.300 | 100.550 | 45.947 | 0.00 | 0.00 |
| ATOM | 13936 | C   | PHE | 925 | 118.527 | 103.807 | 43.350 | 0.00 | 0.00 |
| ATOM | 13937 | O   | PHE | 925 | 117.374 | 104.138 | 43.551 | 0.00 | 0.00 |
| ATOM | 13938 | N   | ASP | 926 | 119.052 | 103.849 | 42.112 | 0.00 | 0.00 |
| ATOM | 13939 | H   | ASP | 926 | 119.988 | 103.493 | 41.978 | 0.00 | 0.00 |
| ATOM | 13940 | CA  | ASP | 926 | 118.420 | 104.349 | 40.869 | 0.00 | 0.00 |
| ATOM | 13941 | HA  | ASP | 926 | 118.078 | 105.375 | 41.002 | 0.00 | 0.00 |
| ATOM | 13942 | CB  | ASP | 926 | 119.499 | 104.372 | 39.818 | 0.00 | 0.00 |
| ATOM | 13943 | HB2 | ASP | 926 | 120.276 | 105.093 | 40.072 | 0.00 | 0.00 |
| ATOM | 13944 | HB3 | ASP | 926 | 120.053 | 103.433 | 39.840 | 0.00 | 0.00 |
| ATOM | 13945 | CG  | ASP | 926 | 119.134 | 104.764 | 38.415 | 0.00 | 0.00 |
| ATOM | 13946 | OD1 | ASP | 926 | 119.699 | 104.176 | 37.481 | 0.00 | 0.00 |
| ATOM | 13947 | OD2 | ASP | 926 | 118.296 | 105.625 | 38.198 | 0.00 | 0.00 |
| ATOM | 13948 | C   | ASP | 926 | 117.300 | 103.424 | 40.413 | 0.00 | 0.00 |
| ATOM | 13949 | O   | ASP | 926 | 117.470 | 102.580 | 39.484 | 0.00 | 0.00 |
| ATOM | 13950 | N   | ARG | 927 | 116.049 | 103.508 | 41.002 | 0.00 | 0.00 |
| ATOM | 13951 | H   | ARG | 927 | 115.977 | 104.089 | 41.825 | 0.00 | 0.00 |
| ATOM | 13952 | CA  | ARG | 927 | 114.833 | 102.640 | 40.720 | 0.00 | 0.00 |
| ATOM | 13953 | HA  | ARG | 927 | 115.056 | 101.663 | 41.149 | 0.00 | 0.00 |
| ATOM | 13954 | CB  | ARG | 927 | 113.612 | 103.240 | 41.478 | 0.00 | 0.00 |
| ATOM | 13955 | HB2 | ARG | 927 | 113.131 | 104.000 | 40.863 | 0.00 | 0.00 |
| ATOM | 13956 | HB3 | ARG | 927 | 112.810 | 102.501 | 41.497 | 0.00 | 0.00 |
| ATOM | 13957 | CG  | ARG | 927 | 113.674 | 103.694 | 42.913 | 0.00 | 0.00 |
| ATOM | 13958 | HG2 | ARG | 927 | 114.449 | 104.456 | 42.998 | 0.00 | 0.00 |

ATOM 13959 HG3 ARG 927 112.637 103.911 43.169 0.00 0.00  
ATOM 13960 CD ARG 927 114.270 102.527 43.731 0.00 0.00  
ATOM 13961 HD2 ARG 927 113.650 101.642 43.584 0.00 0.00  
ATOM 13962 HD3 ARG 927 115.288 102.385 43.369 0.00 0.00  
ATOM 13963 NE ARG 927 114.395 102.827 45.104 0.00 0.00  
ATOM 13964 HE ARG 927 115.327 103.008 45.450 0.00 0.00  
ATOM 13965 CZ ARG 927 113.451 102.715 46.036 0.00 0.00  
ATOM 13966 NH1 ARG 927 112.220 102.385 45.746 0.00 0.00  
ATOM 13967 1HH1 ARG 927 111.500 102.289 46.447 0.00 0.00  
ATOM 13968 2HH1 ARG 927 111.926 102.317 44.782 0.00 0.00  
ATOM 13969 NH2 ARG 927 113.650 102.809 47.316 0.00 0.00  
ATOM 13970 1HH2 ARG 927 112.856 102.510 47.865 0.00 0.00  
ATOM 13971 2HH2 ARG 927 114.580 102.826 47.709 0.00 0.00  
ATOM 13972 C ARG 927 114.488 102.254 39.298 0.00 0.00  
ATOM 13973 O ARG 927 113.845 101.263 39.022 0.00 0.00  
ATOM 13974 N GLN 928 114.934 103.033 38.330 0.00 0.00  
ATOM 13975 H GLN 928 115.433 103.782 38.788 0.00 0.00  
ATOM 13976 CA GLN 928 114.661 102.834 36.878 0.00 0.00  
ATOM 13977 HA GLN 928 113.585 102.689 36.782 0.00 0.00  
ATOM 13978 CB GLN 928 115.212 103.949 36.062 0.00 0.00  
ATOM 13979 HB2 GLN 928 114.930 104.832 36.636 0.00 0.00  
ATOM 13980 HB3 GLN 928 116.291 103.836 35.956 0.00 0.00  
ATOM 13981 CG GLN 928 114.609 104.139 34.638 0.00 0.00  
ATOM 13982 HG2 GLN 928 115.148 104.918 34.098 0.00 0.00  
ATOM 13983 HG3 GLN 928 114.687 103.265 33.991 0.00 0.00  
ATOM 13984 CD GLN 928 113.222 104.634 34.775 0.00 0.00

|      |       |      |     |     |         |         |        |      |      |
|------|-------|------|-----|-----|---------|---------|--------|------|------|
| ATOM | 13985 | OE1  | GLN | 928 | 113.003 | 105.639 | 35.430 | 0.00 | 0.00 |
| ATOM | 13986 | NE2  | GLN | 928 | 112.371 | 104.085 | 33.990 | 0.00 | 0.00 |
| ATOM | 13987 | 1HE2 | GLN | 928 | 111.426 | 104.441 | 33.994 | 0.00 | 0.00 |
| ATOM | 13988 | 2HE2 | GLN | 928 | 112.645 | 103.253 | 33.488 | 0.00 | 0.00 |
| ATOM | 13989 | C    | GLN | 928 | 115.274 | 101.497 | 36.383 | 0.00 | 0.00 |
| ATOM | 13990 | O    | GLN | 928 | 114.505 | 100.769 | 35.721 | 0.00 | 0.00 |
| ATOM | 13991 | N    | GLN | 929 | 116.409 | 101.079 | 36.932 | 0.00 | 0.00 |
| ATOM | 13992 | H    | GLN | 929 | 116.890 | 101.810 | 37.436 | 0.00 | 0.00 |
| ATOM | 13993 | CA   | GLN | 929 | 117.096 | 99.775  | 36.679 | 0.00 | 0.00 |
| ATOM | 13994 | HA   | GLN | 929 | 117.354 | 99.639  | 35.628 | 0.00 | 0.00 |
| ATOM | 13995 | CB   | GLN | 929 | 118.492 | 99.777  | 37.453 | 0.00 | 0.00 |
| ATOM | 13996 | HB2  | GLN | 929 | 118.326 | 100.221 | 38.435 | 0.00 | 0.00 |
| ATOM | 13997 | HB3  | GLN | 929 | 118.849 | 98.752  | 37.544 | 0.00 | 0.00 |
| ATOM | 13998 | CG   | GLN | 929 | 119.512 | 100.664 | 36.777 | 0.00 | 0.00 |
| ATOM | 13999 | HG2  | GLN | 929 | 119.665 | 100.288 | 35.765 | 0.00 | 0.00 |
| ATOM | 14000 | HG3  | GLN | 929 | 119.044 | 101.646 | 36.716 | 0.00 | 0.00 |
| ATOM | 14001 | CD   | GLN | 929 | 120.834 | 100.653 | 37.533 | 0.00 | 0.00 |
| ATOM | 14002 | OE1  | GLN | 929 | 121.311 | 99.566  | 37.894 | 0.00 | 0.00 |
| ATOM | 14003 | NE2  | GLN | 929 | 121.435 | 101.797 | 37.775 | 0.00 | 0.00 |
| ATOM | 14004 | 1HE2 | GLN | 929 | 122.191 | 101.790 | 38.445 | 0.00 | 0.00 |
| ATOM | 14005 | 2HE2 | GLN | 929 | 120.959 | 102.650 | 37.517 | 0.00 | 0.00 |
| ATOM | 14006 | C    | GLN | 929 | 116.244 | 98.584  | 37.081 | 0.00 | 0.00 |
| ATOM | 14007 | O    | GLN | 929 | 116.596 | 97.482  | 36.637 | 0.00 | 0.00 |
| ATOM | 14008 | N    | ALA | 930 | 115.254 | 98.759  | 37.935 | 0.00 | 0.00 |
| ATOM | 14009 | H    | ALA | 930 | 115.034 | 99.675  | 38.299 | 0.00 | 0.00 |
| ATOM | 14010 | CA   | ALA | 930 | 114.491 | 97.705  | 38.635 | 0.00 | 0.00 |

|      |       |     |     |     |         |         |        |      |      |
|------|-------|-----|-----|-----|---------|---------|--------|------|------|
| ATOM | 14011 | HA  | ALA | 930 | 114.740 | 96.704  | 38.284 | 0.00 | 0.00 |
| ATOM | 14012 | CB  | ALA | 930 | 114.844 | 97.742  | 40.122 | 0.00 | 0.00 |
| ATOM | 14013 | HB1 | ALA | 930 | 115.921 | 97.716  | 40.282 | 0.00 | 0.00 |
| ATOM | 14014 | HB2 | ALA | 930 | 114.464 | 98.682  | 40.523 | 0.00 | 0.00 |
| ATOM | 14015 | HB3 | ALA | 930 | 114.321 | 96.961  | 40.675 | 0.00 | 0.00 |
| ATOM | 14016 | C   | ALA | 930 | 112.926 | 97.813  | 38.410 | 0.00 | 0.00 |
| ATOM | 14017 | O   | ALA | 930 | 112.121 | 97.278  | 39.138 | 0.00 | 0.00 |
| ATOM | 14018 | N   | ALA | 931 | 112.493 | 98.498  | 37.367 | 0.00 | 0.00 |
| ATOM | 14019 | H   | ALA | 931 | 113.246 | 98.886  | 36.818 | 0.00 | 0.00 |
| ATOM | 14020 | CA  | ALA | 931 | 111.104 | 98.752  | 37.044 | 0.00 | 0.00 |
| ATOM | 14021 | HA  | ALA | 931 | 110.528 | 98.964  | 37.945 | 0.00 | 0.00 |
| ATOM | 14022 | CB  | ALA | 931 | 111.014 | 100.010 | 36.151 | 0.00 | 0.00 |
| ATOM | 14023 | HB1 | ALA | 931 | 111.782 | 100.716 | 36.467 | 0.00 | 0.00 |
| ATOM | 14024 | HB2 | ALA | 931 | 111.276 | 99.708  | 35.137 | 0.00 | 0.00 |
| ATOM | 14025 | HB3 | ALA | 931 | 109.996 | 100.396 | 36.110 | 0.00 | 0.00 |
| ATOM | 14026 | C   | ALA | 931 | 110.514 | 97.453  | 36.397 | 0.00 | 0.00 |
| ATOM | 14027 | O   | ALA | 931 | 110.828 | 97.063  | 35.218 | 0.00 | 0.00 |
| ATOM | 14028 | N   | GLY | 932 | 109.731 | 96.717  | 37.145 | 0.00 | 0.00 |
| ATOM | 14029 | H   | GLY | 932 | 109.668 | 96.977  | 38.119 | 0.00 | 0.00 |
| ATOM | 14030 | CA  | GLY | 932 | 109.175 | 95.452  | 36.756 | 0.00 | 0.00 |
| ATOM | 14031 | HA2 | GLY | 932 | 108.264 | 95.285  | 37.331 | 0.00 | 0.00 |
| ATOM | 14032 | HA3 | GLY | 932 | 108.924 | 95.358  | 35.700 | 0.00 | 0.00 |
| ATOM | 14033 | C   | GLY | 932 | 110.027 | 94.286  | 37.090 | 0.00 | 0.00 |
| ATOM | 14034 | O   | GLY | 932 | 109.729 | 93.227  | 36.642 | 0.00 | 0.00 |
| ATOM | 14035 | N   | TYR | 933 | 111.048 | 94.435  | 37.929 | 0.00 | 0.00 |
| ATOM | 14036 | H   | TYR | 933 | 111.086 | 95.391  | 38.251 | 0.00 | 0.00 |

|      |       |     |     |     |         |        |        |      |      |
|------|-------|-----|-----|-----|---------|--------|--------|------|------|
| ATOM | 14037 | CA  | TYR | 933 | 111.834 | 93.491 | 38.610 | 0.00 | 0.00 |
| ATOM | 14038 | HA  | TYR | 933 | 111.682 | 92.526 | 38.127 | 0.00 | 0.00 |
| ATOM | 14039 | CB  | TYR | 933 | 113.254 | 93.807 | 38.287 | 0.00 | 0.00 |
| ATOM | 14040 | HB2 | TYR | 933 | 113.547 | 94.733 | 38.782 | 0.00 | 0.00 |
| ATOM | 14041 | HB3 | TYR | 933 | 113.791 | 92.978 | 38.749 | 0.00 | 0.00 |
| ATOM | 14042 | CG  | TYR | 933 | 113.753 | 93.905 | 36.887 | 0.00 | 0.00 |
| ATOM | 14043 | CD1 | TYR | 933 | 113.580 | 95.024 | 36.088 | 0.00 | 0.00 |
| ATOM | 14044 | HD1 | TYR | 933 | 113.164 | 95.892 | 36.579 | 0.00 | 0.00 |
| ATOM | 14045 | CE1 | TYR | 933 | 114.219 | 95.122 | 34.866 | 0.00 | 0.00 |
| ATOM | 14046 | HE1 | TYR | 933 | 114.124 | 96.032 | 34.292 | 0.00 | 0.00 |
| ATOM | 14047 | CZ  | TYR | 933 | 114.869 | 93.967 | 34.302 | 0.00 | 0.00 |
| ATOM | 14048 | OH  | TYR | 933 | 115.423 | 94.096 | 33.096 | 0.00 | 0.00 |
| ATOM | 14049 | HH  | TYR | 933 | 116.244 | 93.598 | 33.073 | 0.00 | 0.00 |
| ATOM | 14050 | CE2 | TYR | 933 | 114.968 | 92.758 | 35.066 | 0.00 | 0.00 |
| ATOM | 14051 | HE2 | TYR | 933 | 115.509 | 91.902 | 34.690 | 0.00 | 0.00 |
| ATOM | 14052 | CD2 | TYR | 933 | 114.394 | 92.758 | 36.356 | 0.00 | 0.00 |
| ATOM | 14053 | HD2 | TYR | 933 | 114.599 | 91.940 | 37.032 | 0.00 | 0.00 |
| ATOM | 14054 | C   | TYR | 933 | 111.490 | 93.346 | 40.112 | 0.00 | 0.00 |
| ATOM | 14055 | O   | TYR | 933 | 111.180 | 94.275 | 40.754 | 0.00 | 0.00 |
| ATOM | 14056 | N   | ARG | 934 | 111.593 | 92.086 | 40.544 | 0.00 | 0.00 |
| ATOM | 14057 | H   | ARG | 934 | 111.884 | 91.387 | 39.876 | 0.00 | 0.00 |
| ATOM | 14058 | CA  | ARG | 934 | 111.528 | 91.606 | 41.934 | 0.00 | 0.00 |
| ATOM | 14059 | HA  | ARG | 934 | 111.378 | 92.462 | 42.592 | 0.00 | 0.00 |
| ATOM | 14060 | CB  | ARG | 934 | 110.349 | 90.681 | 42.088 | 0.00 | 0.00 |
| ATOM | 14061 | HB2 | ARG | 934 | 110.347 | 90.383 | 43.136 | 0.00 | 0.00 |
| ATOM | 14062 | HB3 | ARG | 934 | 109.402 | 91.188 | 41.904 | 0.00 | 0.00 |



ATOM 14063 CG ARG 934 110.471 89.440 41.209 0.00 0.00  
ATOM 14064 HG2 ARG 934 110.330 89.807 40.192 0.00 0.00  
ATOM 14065 HG3 ARG 934 111.432 88.928 41.253 0.00 0.00  
ATOM 14066 CD ARG 934 109.284 88.592 41.696 0.00 0.00  
ATOM 14067 HD2 ARG 934 109.242 88.542 42.785 0.00 0.00  
ATOM 14068 HD3 ARG 934 108.390 89.120 41.363 0.00 0.00  
ATOM 14069 NE ARG 934 109.271 87.179 41.150 0.00 0.00  
ATOM 14070 HE ARG 934 108.583 86.897 40.467 0.00 0.00  
ATOM 14071 CZ ARG 934 110.073 86.150 41.459 0.00 0.00  
ATOM 14072 NH1 ARG 934 111.023 86.308 42.311 0.00 0.00  
ATOM 14073 1HH1 ARG 934 111.508 85.501 42.676 0.00 0.00  
ATOM 14074 2HH1 ARG 934 111.346 87.203 42.650 0.00 0.00  
ATOM 14075 NH2 ARG 934 109.952 85.044 40.906 0.00 0.00  
ATOM 14076 1HH2 ARG 934 110.639 84.326 41.086 0.00 0.00  
ATOM 14077 2HH2 ARG 934 109.140 84.825 40.347 0.00 0.00  
ATOM 14078 C ARG 934 112.840 90.866 42.250 0.00 0.00  
ATOM 14079 O ARG 934 113.546 90.514 41.313 0.00 0.00  
ATOM 14080 N LEU 935 113.061 90.656 43.553 0.00 0.00  
ATOM 14081 H LEU 935 112.267 90.762 44.168 0.00 0.00  
ATOM 14082 CA LEU 935 114.235 89.968 44.102 0.00 0.00  
ATOM 14083 HA LEU 935 115.148 90.408 43.701 0.00 0.00  
ATOM 14084 CB LEU 935 114.311 90.120 45.617 0.00 0.00  
ATOM 14085 HB2 LEU 935 113.323 89.937 46.041 0.00 0.00  
ATOM 14086 HB3 LEU 935 114.954 89.362 46.063 0.00 0.00  
ATOM 14087 CG LEU 935 114.821 91.440 46.203 0.00 0.00  
ATOM 14088 HG LEU 935 114.486 92.273 45.585 0.00 0.00

|      |       |      |     |     |         |        |        |      |      |
|------|-------|------|-----|-----|---------|--------|--------|------|------|
| ATOM | 14089 | CD1  | LEU | 935 | 114.169 | 91.713 | 47.560 | 0.00 | 0.00 |
| ATOM | 14090 | 1HD1 | LEU | 935 | 113.080 | 91.686 | 47.566 | 0.00 | 0.00 |
| ATOM | 14091 | 2HD1 | LEU | 935 | 114.423 | 90.887 | 48.225 | 0.00 | 0.00 |
| ATOM | 14092 | 3HD1 | LEU | 935 | 114.494 | 92.683 | 47.935 | 0.00 | 0.00 |
| ATOM | 14093 | CD2  | LEU | 935 | 116.321 | 91.372 | 46.400 | 0.00 | 0.00 |
| ATOM | 14094 | 1HD2 | LEU | 935 | 116.615 | 92.314 | 46.863 | 0.00 | 0.00 |
| ATOM | 14095 | 2HD2 | LEU | 935 | 116.606 | 90.507 | 47.000 | 0.00 | 0.00 |
| ATOM | 14096 | 3HD2 | LEU | 935 | 116.863 | 91.255 | 45.462 | 0.00 | 0.00 |
| ATOM | 14097 | C    | LEU | 935 | 114.315 | 88.488 | 43.582 | 0.00 | 0.00 |
| ATOM | 14098 | O    | LEU | 935 | 113.336 | 87.774 | 43.399 | 0.00 | 0.00 |
| ATOM | 14099 | N    | ASN | 936 | 115.578 | 88.047 | 43.358 | 0.00 | 0.00 |
| ATOM | 14100 | H    | ASN | 936 | 116.360 | 88.651 | 43.566 | 0.00 | 0.00 |
| ATOM | 14101 | CA   | ASN | 936 | 115.849 | 86.765 | 42.665 | 0.00 | 0.00 |
| ATOM | 14102 | HA   | ASN | 936 | 114.906 | 86.461 | 42.209 | 0.00 | 0.00 |
| ATOM | 14103 | CB   | ASN | 936 | 116.994 | 86.760 | 41.622 | 0.00 | 0.00 |
| ATOM | 14104 | HB2  | ASN | 936 | 116.973 | 87.747 | 41.159 | 0.00 | 0.00 |
| ATOM | 14105 | HB3  | ASN | 936 | 117.943 | 86.581 | 42.127 | 0.00 | 0.00 |
| ATOM | 14106 | CG   | ASN | 936 | 116.952 | 85.600 | 40.548 | 0.00 | 0.00 |
| ATOM | 14107 | OD1  | ASN | 936 | 115.918 | 84.947 | 40.279 | 0.00 | 0.00 |
| ATOM | 14108 | ND2  | ASN | 936 | 118.059 | 85.193 | 39.967 | 0.00 | 0.00 |
| ATOM | 14109 | 1HD2 | ASN | 936 | 118.059 | 84.341 | 39.424 | 0.00 | 0.00 |
| ATOM | 14110 | 2HD2 | ASN | 936 | 118.910 | 85.736 | 39.963 | 0.00 | 0.00 |
| ATOM | 14111 | C    | ASN | 936 | 115.869 | 85.576 | 43.635 | 0.00 | 0.00 |
| ATOM | 14112 | O    | ASN | 936 | 116.420 | 84.515 | 43.396 | 0.00 | 0.00 |
| ATOM | 14113 | N    | ILE | 937 | 115.496 | 85.822 | 44.934 | 0.00 | 0.00 |
| ATOM | 14114 | H    | ILE | 937 | 115.028 | 86.714 | 45.001 | 0.00 | 0.00 |

ATOM 14115 CA ILE 937 115.580 84.946 46.110 0.00 0.00  
ATOM 14116 HA ILE 937 116.500 84.363 46.067 0.00 0.00  
ATOM 14117 CB ILE 937 115.862 85.812 47.396 0.00 0.00  
ATOM 14118 HB ILE 937 116.065 85.133 48.223 0.00 0.00  
ATOM 14119 CG2 ILE 937 117.110 86.656 47.125 0.00 0.00  
ATOM 14120 1HG2 ILE 937 117.977 86.033 46.902 0.00 0.00  
ATOM 14121 2HG2 ILE 937 117.110 87.304 46.248 0.00 0.00  
ATOM 14122 3HG2 ILE 937 117.383 87.361 47.911 0.00 0.00  
ATOM 14123 CG1 ILE 937 114.635 86.690 47.652 0.00 0.00  
ATOM 14124 2HG1 ILE 937 114.248 87.184 46.760 0.00 0.00  
ATOM 14125 3HG1 ILE 937 113.897 85.961 47.987 0.00 0.00  
ATOM 14126 CD1 ILE 937 114.732 87.579 48.911 0.00 0.00  
ATOM 14127 1HD1 ILE 937 115.464 87.174 49.609 0.00 0.00  
ATOM 14128 2HD1 ILE 937 115.134 88.507 48.505 0.00 0.00  
ATOM 14129 3HD1 ILE 937 113.767 87.754 49.387 0.00 0.00  
ATOM 14130 C ILE 937 114.288 84.048 46.190 0.00 0.00  
ATOM 14131 O ILE 937 113.165 84.393 45.705 0.00 0.00  
ATOM 14132 N PRO 938 114.362 82.892 46.878 0.00 0.00  
ATOM 14133 CD PRO 938 115.549 82.172 47.360 0.00 0.00  
ATOM 14134 HD2 PRO 938 116.348 82.138 46.619 0.00 0.00  
ATOM 14135 HD3 PRO 938 115.874 82.824 48.170 0.00 0.00  
ATOM 14136 CG PRO 938 115.117 80.828 47.828 0.00 0.00  
ATOM 14137 HG2 PRO 938 115.339 80.028 47.121 0.00 0.00  
ATOM 14138 HG3 PRO 938 115.527 80.660 48.824 0.00 0.00  
ATOM 14139 CB PRO 938 113.636 80.917 47.973 0.00 0.00  
ATOM 14140 HB2 PRO 938 113.154 79.962 47.766 0.00 0.00

|      |       |     |     |     |         |        |        |      |      |
|------|-------|-----|-----|-----|---------|--------|--------|------|------|
| ATOM | 14141 | HB3 | PRO | 938 | 113.516 | 81.251 | 49.004 | 0.00 | 0.00 |
| ATOM | 14142 | CA  | PRO | 938 | 113.163 | 82.026 | 47.012 | 0.00 | 0.00 |
| ATOM | 14143 | HA  | PRO | 938 | 112.949 | 81.605 | 46.030 | 0.00 | 0.00 |
| ATOM | 14144 | C   | PRO | 938 | 111.867 | 82.670 | 47.562 | 0.00 | 0.00 |
| ATOM | 14145 | O   | PRO | 938 | 111.921 | 83.484 | 48.494 | 0.00 | 0.00 |
| ATOM | 14146 | N   | ALA | 939 | 110.734 | 82.169 | 47.125 | 0.00 | 0.00 |
| ATOM | 14147 | H   | ALA | 939 | 110.782 | 81.439 | 46.428 | 0.00 | 0.00 |
| ATOM | 14148 | CA  | ALA | 939 | 109.416 | 82.585 | 47.441 | 0.00 | 0.00 |
| ATOM | 14149 | HA  | ALA | 939 | 109.475 | 83.644 | 47.188 | 0.00 | 0.00 |
| ATOM | 14150 | CB  | ALA | 939 | 108.387 | 81.863 | 46.609 | 0.00 | 0.00 |
| ATOM | 14151 | HB1 | ALA | 939 | 108.494 | 80.780 | 46.681 | 0.00 | 0.00 |
| ATOM | 14152 | HB2 | ALA | 939 | 107.411 | 82.044 | 47.058 | 0.00 | 0.00 |
| ATOM | 14153 | HB3 | ALA | 939 | 108.503 | 82.130 | 45.559 | 0.00 | 0.00 |
| ATOM | 14154 | C   | ALA | 939 | 109.071 | 82.607 | 48.945 | 0.00 | 0.00 |
| ATOM | 14155 | O   | ALA | 939 | 109.170 | 81.522 | 49.580 | 0.00 | 0.00 |
| ATOM | 14156 | N   | GLY | 940 | 108.804 | 83.868 | 49.482 | 0.00 | 0.00 |
| ATOM | 14157 | H   | GLY | 940 | 108.844 | 84.646 | 48.839 | 0.00 | 0.00 |
| ATOM | 14158 | CA  | GLY | 940 | 108.659 | 84.161 | 50.870 | 0.00 | 0.00 |
| ATOM | 14159 | HA2 | GLY | 940 | 108.124 | 85.047 | 51.212 | 0.00 | 0.00 |
| ATOM | 14160 | HA3 | GLY | 940 | 108.204 | 83.352 | 51.441 | 0.00 | 0.00 |
| ATOM | 14161 | C   | GLY | 940 | 109.980 | 84.427 | 51.714 | 0.00 | 0.00 |
| ATOM | 14162 | O   | GLY | 940 | 109.891 | 84.831 | 52.894 | 0.00 | 0.00 |
| ATOM | 14163 | N   | THR | 941 | 111.154 | 84.199 | 51.168 | 0.00 | 0.00 |
| ATOM | 14164 | H   | THR | 941 | 111.099 | 83.935 | 50.195 | 0.00 | 0.00 |
| ATOM | 14165 | CA  | THR | 941 | 112.446 | 84.740 | 51.795 | 0.00 | 0.00 |
| ATOM | 14166 | HA  | THR | 941 | 112.457 | 84.755 | 52.885 | 0.00 | 0.00 |

|      |       |      |     |     |         |        |        |      |      |
|------|-------|------|-----|-----|---------|--------|--------|------|------|
| ATOM | 14167 | CB   | THR | 941 | 113.716 | 83.979 | 51.439 | 0.00 | 0.00 |
| ATOM | 14168 | HB   | THR | 941 | 114.516 | 84.471 | 51.992 | 0.00 | 0.00 |
| ATOM | 14169 | CG2  | THR | 941 | 113.615 | 82.455 | 51.612 | 0.00 | 0.00 |
| ATOM | 14170 | 1HG2 | THR | 941 | 113.591 | 82.192 | 52.669 | 0.00 | 0.00 |
| ATOM | 14171 | 2HG2 | THR | 941 | 112.651 | 82.071 | 51.278 | 0.00 | 0.00 |
| ATOM | 14172 | 3HG2 | THR | 941 | 114.459 | 81.897 | 51.206 | 0.00 | 0.00 |
| ATOM | 14173 | OG1  | THR | 941 | 114.005 | 84.181 | 50.113 | 0.00 | 0.00 |
| ATOM | 14174 | HG1  | THR | 941 | 113.269 | 83.829 | 49.607 | 0.00 | 0.00 |
| ATOM | 14175 | C    | THR | 941 | 112.757 | 86.187 | 51.539 | 0.00 | 0.00 |
| ATOM | 14176 | O    | THR | 941 | 111.962 | 86.799 | 50.856 | 0.00 | 0.00 |
| ATOM | 14177 | N    | ALA | 942 | 113.710 | 86.765 | 52.268 | 0.00 | 0.00 |
| ATOM | 14178 | H    | ALA | 942 | 114.226 | 86.156 | 52.887 | 0.00 | 0.00 |
| ATOM | 14179 | CA   | ALA | 942 | 113.877 | 88.244 | 52.386 | 0.00 | 0.00 |
| ATOM | 14180 | HA   | ALA | 942 | 113.514 | 88.719 | 51.475 | 0.00 | 0.00 |
| ATOM | 14181 | CB   | ALA | 942 | 113.068 | 88.844 | 53.580 | 0.00 | 0.00 |
| ATOM | 14182 | HB1  | ALA | 942 | 112.132 | 88.326 | 53.788 | 0.00 | 0.00 |
| ATOM | 14183 | HB2  | ALA | 942 | 113.713 | 88.877 | 54.458 | 0.00 | 0.00 |
| ATOM | 14184 | HB3  | ALA | 942 | 112.906 | 89.903 | 53.379 | 0.00 | 0.00 |
| ATOM | 14185 | C    | ALA | 942 | 115.346 | 88.732 | 52.409 | 0.00 | 0.00 |
| ATOM | 14186 | O    | ALA | 942 | 116.253 | 87.981 | 52.545 | 0.00 | 0.00 |
| ATOM | 14187 | N    | VAL | 943 | 115.412 | 90.021 | 52.365 | 0.00 | 0.00 |
| ATOM | 14188 | H    | VAL | 943 | 114.582 | 90.547 | 52.133 | 0.00 | 0.00 |
| ATOM | 14189 | CA   | VAL | 943 | 116.704 | 90.770 | 52.509 | 0.00 | 0.00 |
| ATOM | 14190 | HA   | VAL | 943 | 117.475 | 90.098 | 52.885 | 0.00 | 0.00 |
| ATOM | 14191 | CB   | VAL | 943 | 117.101 | 91.406 | 51.142 | 0.00 | 0.00 |
| ATOM | 14192 | HB   | VAL | 943 | 116.438 | 92.261 | 51.012 | 0.00 | 0.00 |

ATOM 14193 CG1 VAL 943 118.606 91.876 51.224 0.00 0.00  
ATOM 14194 1HG1 VAL 943 119.155 91.078 51.723 0.00 0.00  
ATOM 14195 2HG1 VAL 943 118.978 91.947 50.201 0.00 0.00  
ATOM 14196 3HG1 VAL 943 118.678 92.815 51.773 0.00 0.00  
ATOM 14197 CG2 VAL 943 116.937 90.434 50.017 0.00 0.00  
ATOM 14198 1HG2 VAL 943 117.391 90.911 49.149 0.00 0.00  
ATOM 14199 2HG2 VAL 943 117.588 89.566 50.126 0.00 0.00  
ATOM 14200 3HG2 VAL 943 115.890 90.168 49.871 0.00 0.00  
ATOM 14201 C VAL 943 116.522 91.884 53.512 0.00 0.00  
ATOM 14202 O VAL 943 115.567 92.644 53.392 0.00 0.00  
ATOM 14203 N ARG 944 117.395 91.968 54.461 0.00 0.00  
ATOM 14204 H ARG 944 118.169 91.321 54.409 0.00 0.00  
ATOM 14205 CA ARG 944 117.332 92.736 55.688 0.00 0.00  
ATOM 14206 HA ARG 944 116.354 93.214 55.752 0.00 0.00  
ATOM 14207 CB ARG 944 117.546 91.877 56.917 0.00 0.00  
ATOM 14208 HB2 ARG 944 116.962 90.984 56.693 0.00 0.00  
ATOM 14209 HB3 ARG 944 118.573 91.545 57.069 0.00 0.00  
ATOM 14210 CG ARG 944 116.983 92.570 58.188 0.00 0.00  
ATOM 14211 HG2 ARG 944 117.549 93.501 58.204 0.00 0.00  
ATOM 14212 HG3 ARG 944 115.911 92.680 58.023 0.00 0.00  
ATOM 14213 CD ARG 944 117.247 91.829 59.493 0.00 0.00  
ATOM 14214 HD2 ARG 944 116.732 90.870 59.435 0.00 0.00  
ATOM 14215 HD3 ARG 944 118.279 91.491 59.588 0.00 0.00  
ATOM 14216 NE ARG 944 116.734 92.597 60.590 0.00 0.00  
ATOM 14217 HE ARG 944 115.796 92.442 60.932 0.00 0.00  
ATOM 14218 CZ ARG 944 117.340 93.632 61.195 0.00 0.00

|      |       |      |     |     |         |        |        |      |      |
|------|-------|------|-----|-----|---------|--------|--------|------|------|
| ATOM | 14219 | NH1  | ARG | 944 | 118.482 | 94.022 | 60.838 | 0.00 | 0.00 |
| ATOM | 14220 | 1HH1 | ARG | 944 | 119.029 | 94.624 | 61.437 | 0.00 | 0.00 |
| ATOM | 14221 | 2HH1 | ARG | 944 | 118.835 | 93.523 | 60.033 | 0.00 | 0.00 |
| ATOM | 14222 | NH2  | ARG | 944 | 116.873 | 94.112 | 62.320 | 0.00 | 0.00 |
| ATOM | 14223 | 1HH2 | ARG | 944 | 117.432 | 94.717 | 62.904 | 0.00 | 0.00 |
| ATOM | 14224 | 2HH2 | ARG | 944 | 115.867 | 94.048 | 62.379 | 0.00 | 0.00 |
| ATOM | 14225 | C    | ARG | 944 | 118.310 | 93.902 | 55.638 | 0.00 | 0.00 |
| ATOM | 14226 | O    | ARG | 944 | 119.383 | 93.692 | 55.083 | 0.00 | 0.00 |
| ATOM | 14227 | N    | PHE | 945 | 118.024 | 95.077 | 56.193 | 0.00 | 0.00 |
| ATOM | 14228 | H    | PHE | 945 | 117.138 | 95.093 | 56.678 | 0.00 | 0.00 |
| ATOM | 14229 | CA   | PHE | 945 | 118.992 | 96.161 | 56.281 | 0.00 | 0.00 |
| ATOM | 14230 | HA   | PHE | 945 | 120.002 | 95.763 | 56.191 | 0.00 | 0.00 |
| ATOM | 14231 | CB   | PHE | 945 | 118.809 | 97.320 | 55.300 | 0.00 | 0.00 |
| ATOM | 14232 | HB2  | PHE | 945 | 117.960 | 97.944 | 55.580 | 0.00 | 0.00 |
| ATOM | 14233 | HB3  | PHE | 945 | 119.671 | 97.959 | 55.493 | 0.00 | 0.00 |
| ATOM | 14234 | CG   | PHE | 945 | 118.868 | 96.967 | 53.883 | 0.00 | 0.00 |
| ATOM | 14235 | CD1  | PHE | 945 | 120.013 | 97.240 | 53.118 | 0.00 | 0.00 |
| ATOM | 14236 | HD1  | PHE | 945 | 120.785 | 97.844 | 53.572 | 0.00 | 0.00 |
| ATOM | 14237 | CE1  | PHE | 945 | 120.105 | 96.677 | 51.801 | 0.00 | 0.00 |
| ATOM | 14238 | HE1  | PHE | 945 | 120.960 | 96.952 | 51.202 | 0.00 | 0.00 |
| ATOM | 14239 | CZ   | PHE | 945 | 119.019 | 95.976 | 51.273 | 0.00 | 0.00 |
| ATOM | 14240 | HZ   | PHE | 945 | 119.184 | 95.389 | 50.382 | 0.00 | 0.00 |
| ATOM | 14241 | CE2  | PHE | 945 | 117.896 | 95.748 | 52.045 | 0.00 | 0.00 |
| ATOM | 14242 | HE2  | PHE | 945 | 117.177 | 95.177 | 51.477 | 0.00 | 0.00 |
| ATOM | 14243 | CD2  | PHE | 945 | 117.756 | 96.273 | 53.309 | 0.00 | 0.00 |
| ATOM | 14244 | HD2  | PHE | 945 | 116.867 | 96.259 | 53.923 | 0.00 | 0.00 |

|      |       |     |     |     |         |         |        |      |      |
|------|-------|-----|-----|-----|---------|---------|--------|------|------|
| ATOM | 14245 | C   | PHE | 945 | 118.763 | 96.848  | 57.690 | 0.00 | 0.00 |
| ATOM | 14246 | O   | PHE | 945 | 117.777 | 97.485  | 57.954 | 0.00 | 0.00 |
| ATOM | 14247 | N   | GLU | 946 | 119.879 | 96.893  | 58.460 | 0.00 | 0.00 |
| ATOM | 14248 | H   | GLU | 946 | 120.681 | 96.337  | 58.200 | 0.00 | 0.00 |
| ATOM | 14249 | CA  | GLU | 946 | 119.929 | 97.869  | 59.524 | 0.00 | 0.00 |
| ATOM | 14250 | HA  | GLU | 946 | 119.051 | 97.834  | 60.169 | 0.00 | 0.00 |
| ATOM | 14251 | CB  | GLU | 946 | 121.310 | 97.602  | 60.243 | 0.00 | 0.00 |
| ATOM | 14252 | HB2 | GLU | 946 | 122.138 | 97.655  | 59.536 | 0.00 | 0.00 |
| ATOM | 14253 | HB3 | GLU | 946 | 121.609 | 98.482  | 60.814 | 0.00 | 0.00 |
| ATOM | 14254 | CG  | GLU | 946 | 121.324 | 96.350  | 61.138 | 0.00 | 0.00 |
| ATOM | 14255 | HG2 | GLU | 946 | 120.902 | 95.537  | 60.547 | 0.00 | 0.00 |
| ATOM | 14256 | HG3 | GLU | 946 | 122.347 | 96.069  | 61.392 | 0.00 | 0.00 |
| ATOM | 14257 | CD  | GLU | 946 | 120.523 | 96.515  | 62.419 | 0.00 | 0.00 |
| ATOM | 14258 | OE1 | GLU | 946 | 119.409 | 95.976  | 62.519 | 0.00 | 0.00 |
| ATOM | 14259 | OE2 | GLU | 946 | 120.807 | 97.328  | 63.310 | 0.00 | 0.00 |
| ATOM | 14260 | C   | GLU | 946 | 119.966 | 99.281  | 58.902 | 0.00 | 0.00 |
| ATOM | 14261 | O   | GLU | 946 | 120.330 | 99.448  | 57.730 | 0.00 | 0.00 |
| ATOM | 14262 | N   | PRO | 947 | 119.719 | 100.302 | 59.706 | 0.00 | 0.00 |
| ATOM | 14263 | CD  | PRO | 947 | 119.342 | 100.188 | 61.084 | 0.00 | 0.00 |
| ATOM | 14264 | HD2 | PRO | 947 | 118.258 | 100.076 | 61.087 | 0.00 | 0.00 |
| ATOM | 14265 | HD3 | PRO | 947 | 119.870 | 99.416  | 61.643 | 0.00 | 0.00 |
| ATOM | 14266 | CG  | PRO | 947 | 119.712 | 101.564 | 61.671 | 0.00 | 0.00 |
| ATOM | 14267 | HG2 | PRO | 947 | 118.908 | 101.822 | 62.360 | 0.00 | 0.00 |
| ATOM | 14268 | HG3 | PRO | 947 | 120.744 | 101.390 | 61.977 | 0.00 | 0.00 |
| ATOM | 14269 | CB  | PRO | 947 | 119.706 | 102.463 | 60.525 | 0.00 | 0.00 |
| ATOM | 14270 | HB2 | PRO | 947 | 118.699 | 102.839 | 60.347 | 0.00 | 0.00 |



|      |       |      |     |     |         |         |        |      |      |
|------|-------|------|-----|-----|---------|---------|--------|------|------|
| ATOM | 14271 | HB3  | PRO | 947 | 120.285 | 103.375 | 60.664 | 0.00 | 0.00 |
| ATOM | 14272 | CA   | PRO | 947 | 120.096 | 101.646 | 59.299 | 0.00 | 0.00 |
| ATOM | 14273 | HA   | PRO | 947 | 119.566 | 102.023 | 58.425 | 0.00 | 0.00 |
| ATOM | 14274 | C    | PRO | 947 | 121.588 | 101.758 | 58.968 | 0.00 | 0.00 |
| ATOM | 14275 | O    | PRO | 947 | 122.377 | 101.214 | 59.735 | 0.00 | 0.00 |
| ATOM | 14276 | N    | GLY | 948 | 121.987 | 102.417 | 57.864 | 0.00 | 0.00 |
| ATOM | 14277 | H    | GLY | 948 | 121.330 | 102.897 | 57.266 | 0.00 | 0.00 |
| ATOM | 14278 | CA   | GLY | 948 | 123.362 | 102.553 | 57.497 | 0.00 | 0.00 |
| ATOM | 14279 | HA2  | GLY | 948 | 123.419 | 103.397 | 56.810 | 0.00 | 0.00 |
| ATOM | 14280 | HA3  | GLY | 948 | 124.036 | 102.749 | 58.331 | 0.00 | 0.00 |
| ATOM | 14281 | C    | GLY | 948 | 123.991 | 101.452 | 56.701 | 0.00 | 0.00 |
| ATOM | 14282 | O    | GLY | 948 | 125.206 | 101.427 | 56.487 | 0.00 | 0.00 |
| ATOM | 14283 | N    | GLN | 949 | 123.261 | 100.405 | 56.297 | 0.00 | 0.00 |
| ATOM | 14284 | H    | GLN | 949 | 122.318 | 100.341 | 56.653 | 0.00 | 0.00 |
| ATOM | 14285 | CA   | GLN | 949 | 123.820 | 99.151  | 55.804 | 0.00 | 0.00 |
| ATOM | 14286 | HA   | GLN | 949 | 124.835 | 99.030  | 56.182 | 0.00 | 0.00 |
| ATOM | 14287 | CB   | GLN | 949 | 123.038 | 97.967  | 56.379 | 0.00 | 0.00 |
| ATOM | 14288 | HB2  | GLN | 949 | 122.761 | 98.209  | 57.405 | 0.00 | 0.00 |
| ATOM | 14289 | HB3  | GLN | 949 | 122.101 | 97.775  | 55.858 | 0.00 | 0.00 |
| ATOM | 14290 | CG   | GLN | 949 | 123.897 | 96.640  | 56.320 | 0.00 | 0.00 |
| ATOM | 14291 | HG2  | GLN | 949 | 123.705 | 96.215  | 55.335 | 0.00 | 0.00 |
| ATOM | 14292 | HG3  | GLN | 949 | 124.967 | 96.840  | 56.374 | 0.00 | 0.00 |
| ATOM | 14293 | CD   | GLN | 949 | 123.416 | 95.832  | 57.488 | 0.00 | 0.00 |
| ATOM | 14294 | OE1  | GLN | 949 | 122.221 | 95.348  | 57.430 | 0.00 | 0.00 |
| ATOM | 14295 | NE2  | GLN | 949 | 124.134 | 95.708  | 58.601 | 0.00 | 0.00 |
| ATOM | 14296 | 1HE2 | GLN | 949 | 123.744 | 95.057  | 59.267 | 0.00 | 0.00 |

ATOM 14297 2HE2 GLN 949 125.082 96.039 58.707 0.00 0.00  
ATOM 14298 C GLN 949 123.841 99.137 54.263 0.00 0.00  
ATOM 14299 O GLN 949 122.764 99.469 53.654 0.00 0.00  
ATOM 14300 N LYS 950 124.928 98.801 53.575 0.00 0.00  
ATOM 14301 H LYS 950 125.767 98.569 54.087 0.00 0.00  
ATOM 14302 CA LYS 950 124.967 98.615 52.110 0.00 0.00  
ATOM 14303 HA LYS 950 124.016 98.845 51.629 0.00 0.00  
ATOM 14304 CB LYS 950 126.053 99.665 51.549 0.00 0.00  
ATOM 14305 HB2 LYS 950 125.805 100.653 51.936 0.00 0.00  
ATOM 14306 HB3 LYS 950 127.027 99.445 51.987 0.00 0.00  
ATOM 14307 CG LYS 950 126.264 99.540 49.997 0.00 0.00  
ATOM 14308 HG2 LYS 950 126.524 98.502 49.791 0.00 0.00  
ATOM 14309 HG3 LYS 950 125.301 99.694 49.511 0.00 0.00  
ATOM 14310 CD LYS 950 127.257 100.525 49.532 0.00 0.00  
ATOM 14311 HD2 LYS 950 128.198 100.352 50.054 0.00 0.00  
ATOM 14312 HD3 LYS 950 127.469 100.354 48.476 0.00 0.00  
ATOM 14313 CE LYS 950 126.846 102.008 49.763 0.00 0.00  
ATOM 14314 HE2 LYS 950 125.878 102.129 49.277 0.00 0.00  
ATOM 14315 HE3 LYS 950 126.789 102.177 50.838 0.00 0.00  
ATOM 14316 NZ LYS 950 127.856 103.005 49.222 0.00 0.00  
ATOM 14317 HZ1 LYS 950 128.168 102.725 48.303 0.00 0.00  
ATOM 14318 HZ2 LYS 950 127.453 103.901 48.990 0.00 0.00  
ATOM 14319 HZ3 LYS 950 128.740 103.149 49.688 0.00 0.00  
ATOM 14320 C LYS 950 125.150 97.146 51.629 0.00 0.00  
ATOM 14321 O LYS 950 125.976 96.412 52.143 0.00 0.00  
ATOM 14322 N ARG 951 124.385 96.674 50.578 0.00 0.00

ATOM 14323 H ARG 951 123.917 97.400 50.056 0.00 0.00  
ATOM 14324 CA ARG 951 124.441 95.411 49.809 0.00 0.00  
ATOM 14325 HA ARG 951 125.376 94.879 49.983 0.00 0.00  
ATOM 14326 CB ARG 951 123.273 94.441 50.241 0.00 0.00  
ATOM 14327 HB2 ARG 951 122.383 94.817 49.736 0.00 0.00  
ATOM 14328 HB3 ARG 951 123.607 93.454 49.922 0.00 0.00  
ATOM 14329 CG ARG 951 123.077 94.384 51.804 0.00 0.00  
ATOM 14330 HG2 ARG 951 123.969 94.078 52.352 0.00 0.00  
ATOM 14331 HG3 ARG 951 122.699 95.353 52.130 0.00 0.00  
ATOM 14332 CD ARG 951 121.958 93.347 52.149 0.00 0.00  
ATOM 14333 HD2 ARG 951 121.021 93.720 51.736 0.00 0.00  
ATOM 14334 HD3 ARG 951 122.247 92.357 51.796 0.00 0.00  
ATOM 14335 NE ARG 951 121.777 93.314 53.604 0.00 0.00  
ATOM 14336 HE ARG 951 120.856 93.625 53.876 0.00 0.00  
ATOM 14337 CZ ARG 951 122.551 92.802 54.515 0.00 0.00  
ATOM 14338 NH1 ARG 951 122.199 92.827 55.740 0.00 0.00  
ATOM 14339 1HH1 ARG 951 122.884 92.524 56.417 0.00 0.00  
ATOM 14340 2HH1 ARG 951 121.265 93.142 55.962 0.00 0.00  
ATOM 14341 NH2 ARG 951 123.742 92.272 54.311 0.00 0.00  
ATOM 14342 1HH2 ARG 951 124.238 92.065 55.166 0.00 0.00  
ATOM 14343 2HH2 ARG 951 124.235 92.228 53.430 0.00 0.00  
ATOM 14344 C ARG 951 124.416 95.742 48.251 0.00 0.00  
ATOM 14345 O ARG 951 123.970 96.802 47.819 0.00 0.00  
ATOM 14346 N GLU 952 124.721 94.850 47.400 0.00 0.00  
ATOM 14347 H GLU 952 125.077 94.040 47.887 0.00 0.00  
ATOM 14348 CA GLU 952 124.238 94.656 46.071 0.00 0.00

|      |       |      |     |     |         |        |        |      |      |
|------|-------|------|-----|-----|---------|--------|--------|------|------|
| ATOM | 14349 | HA   | GLU | 952 | 123.703 | 95.533 | 45.705 | 0.00 | 0.00 |
| ATOM | 14350 | CB   | GLU | 952 | 125.469 | 94.524 | 45.224 | 0.00 | 0.00 |
| ATOM | 14351 | HB2  | GLU | 952 | 126.116 | 95.367 | 45.467 | 0.00 | 0.00 |
| ATOM | 14352 | HB3  | GLU | 952 | 125.989 | 93.609 | 45.506 | 0.00 | 0.00 |
| ATOM | 14353 | CG   | GLU | 952 | 125.278 | 94.546 | 43.668 | 0.00 | 0.00 |
| ATOM | 14354 | HG2  | GLU | 952 | 124.453 | 93.871 | 43.441 | 0.00 | 0.00 |
| ATOM | 14355 | HG3  | GLU | 952 | 124.877 | 95.512 | 43.361 | 0.00 | 0.00 |
| ATOM | 14356 | CD   | GLU | 952 | 126.516 | 94.238 | 42.889 | 0.00 | 0.00 |
| ATOM | 14357 | OE1  | GLU | 952 | 127.230 | 95.169 | 42.353 | 0.00 | 0.00 |
| ATOM | 14358 | OE2  | GLU | 952 | 126.818 | 93.074 | 42.663 | 0.00 | 0.00 |
| ATOM | 14359 | C    | GLU | 952 | 123.360 | 93.433 | 46.120 | 0.00 | 0.00 |
| ATOM | 14360 | O    | GLU | 952 | 123.516 | 92.584 | 47.058 | 0.00 | 0.00 |
| ATOM | 14361 | N    | VAL | 953 | 122.396 | 93.495 | 45.234 | 0.00 | 0.00 |
| ATOM | 14362 | H    | VAL | 953 | 122.223 | 94.353 | 44.729 | 0.00 | 0.00 |
| ATOM | 14363 | CA   | VAL | 953 | 121.246 | 92.486 | 45.240 | 0.00 | 0.00 |
| ATOM | 14364 | HA   | VAL | 953 | 121.670 | 91.598 | 45.709 | 0.00 | 0.00 |
| ATOM | 14365 | CB   | VAL | 953 | 119.991 | 92.878 | 46.069 | 0.00 | 0.00 |
| ATOM | 14366 | HB   | VAL | 953 | 119.374 | 91.984 | 46.154 | 0.00 | 0.00 |
| ATOM | 14367 | CG1  | VAL | 953 | 120.289 | 93.414 | 47.460 | 0.00 | 0.00 |
| ATOM | 14368 | 1HG1 | VAL | 953 | 119.366 | 93.564 | 48.021 | 0.00 | 0.00 |
| ATOM | 14369 | 2HG1 | VAL | 953 | 120.875 | 92.623 | 47.928 | 0.00 | 0.00 |
| ATOM | 14370 | 3HG1 | VAL | 953 | 120.772 | 94.381 | 47.323 | 0.00 | 0.00 |
| ATOM | 14371 | CG2  | VAL | 953 | 119.243 | 93.979 | 45.445 | 0.00 | 0.00 |
| ATOM | 14372 | 1HG2 | VAL | 953 | 119.915 | 94.836 | 45.404 | 0.00 | 0.00 |
| ATOM | 14373 | 2HG2 | VAL | 953 | 118.896 | 93.672 | 44.458 | 0.00 | 0.00 |
| ATOM | 14374 | 3HG2 | VAL | 953 | 118.342 | 94.155 | 46.032 | 0.00 | 0.00 |

|      |       |     |     |     |         |        |        |      |      |
|------|-------|-----|-----|-----|---------|--------|--------|------|------|
| ATOM | 14375 | C   | VAL | 953 | 120.877 | 92.118 | 43.859 | 0.00 | 0.00 |
| ATOM | 14376 | O   | VAL | 953 | 120.933 | 92.975 | 43.032 | 0.00 | 0.00 |
| ATOM | 14377 | N   | GLU | 954 | 120.557 | 90.853 | 43.635 | 0.00 | 0.00 |
| ATOM | 14378 | H   | GLU | 954 | 120.484 | 90.265 | 44.453 | 0.00 | 0.00 |
| ATOM | 14379 | CA  | GLU | 954 | 120.074 | 90.253 | 42.394 | 0.00 | 0.00 |
| ATOM | 14380 | HA  | GLU | 954 | 120.524 | 90.864 | 41.611 | 0.00 | 0.00 |
| ATOM | 14381 | CB  | GLU | 954 | 120.817 | 88.952 | 42.066 | 0.00 | 0.00 |
| ATOM | 14382 | HB2 | GLU | 954 | 121.864 | 89.217 | 42.216 | 0.00 | 0.00 |
| ATOM | 14383 | HB3 | GLU | 954 | 120.457 | 88.211 | 42.779 | 0.00 | 0.00 |
| ATOM | 14384 | CG  | GLU | 954 | 120.499 | 88.433 | 40.597 | 0.00 | 0.00 |
| ATOM | 14385 | HG2 | GLU | 954 | 119.594 | 87.827 | 40.649 | 0.00 | 0.00 |
| ATOM | 14386 | HG3 | GLU | 954 | 120.223 | 89.335 | 40.050 | 0.00 | 0.00 |
| ATOM | 14387 | CD  | GLU | 954 | 121.587 | 87.629 | 39.980 | 0.00 | 0.00 |
| ATOM | 14388 | OE1 | GLU | 954 | 122.694 | 88.158 | 39.759 | 0.00 | 0.00 |
| ATOM | 14389 | OE2 | GLU | 954 | 121.334 | 86.444 | 39.671 | 0.00 | 0.00 |
| ATOM | 14390 | C   | GLU | 954 | 118.553 | 90.243 | 42.259 | 0.00 | 0.00 |
| ATOM | 14391 | O   | GLU | 954 | 117.800 | 89.905 | 43.196 | 0.00 | 0.00 |
| ATOM | 14392 | N   | LEU | 955 | 118.096 | 90.565 | 41.080 | 0.00 | 0.00 |
| ATOM | 14393 | H   | LEU | 955 | 118.694 | 91.100 | 40.467 | 0.00 | 0.00 |
| ATOM | 14394 | CA  | LEU | 955 | 116.684 | 90.738 | 40.791 | 0.00 | 0.00 |
| ATOM | 14395 | HA  | LEU | 955 | 116.042 | 90.354 | 41.583 | 0.00 | 0.00 |
| ATOM | 14396 | CB  | LEU | 955 | 116.327 | 92.217 | 40.414 | 0.00 | 0.00 |
| ATOM | 14397 | HB2 | LEU | 955 | 116.723 | 92.475 | 39.432 | 0.00 | 0.00 |
| ATOM | 14398 | HB3 | LEU | 955 | 115.267 | 92.446 | 40.304 | 0.00 | 0.00 |
| ATOM | 14399 | CG  | LEU | 955 | 116.860 | 93.322 | 41.447 | 0.00 | 0.00 |
| ATOM | 14400 | HG  | LEU | 955 | 117.863 | 93.089 | 41.806 | 0.00 | 0.00 |

|      |       |      |     |     |         |        |        |      |      |
|------|-------|------|-----|-----|---------|--------|--------|------|------|
| ATOM | 14401 | CD1  | LEU | 955 | 116.858 | 94.788 | 40.895 | 0.00 | 0.00 |
| ATOM | 14402 | 1HD1 | LEU | 955 | 115.870 | 95.059 | 40.523 | 0.00 | 0.00 |
| ATOM | 14403 | 2HD1 | LEU | 955 | 117.225 | 95.498 | 41.637 | 0.00 | 0.00 |
| ATOM | 14404 | 3HD1 | LEU | 955 | 117.571 | 94.867 | 40.075 | 0.00 | 0.00 |
| ATOM | 14405 | CD2  | LEU | 955 | 116.020 | 93.366 | 42.677 | 0.00 | 0.00 |
| ATOM | 14406 | 1HD2 | LEU | 955 | 116.082 | 92.376 | 43.127 | 0.00 | 0.00 |
| ATOM | 14407 | 2HD2 | LEU | 955 | 116.373 | 94.101 | 43.400 | 0.00 | 0.00 |
| ATOM | 14408 | 3HD2 | LEU | 955 | 114.965 | 93.571 | 42.492 | 0.00 | 0.00 |
| ATOM | 14409 | C    | LEU | 955 | 116.331 | 89.960 | 39.479 | 0.00 | 0.00 |
| ATOM | 14410 | O    | LEU | 955 | 117.233 | 89.630 | 38.689 | 0.00 | 0.00 |
| ATOM | 14411 | N    | VAL | 956 | 115.056 | 89.700 | 39.193 | 0.00 | 0.00 |
| ATOM | 14412 | H    | VAL | 956 | 114.412 | 90.009 | 39.907 | 0.00 | 0.00 |
| ATOM | 14413 | CA   | VAL | 956 | 114.415 | 88.992 | 38.059 | 0.00 | 0.00 |
| ATOM | 14414 | HA   | VAL | 956 | 115.074 | 89.059 | 37.193 | 0.00 | 0.00 |
| ATOM | 14415 | CB   | VAL | 956 | 114.226 | 87.456 | 38.273 | 0.00 | 0.00 |
| ATOM | 14416 | HB   | VAL | 956 | 115.216 | 87.125 | 38.585 | 0.00 | 0.00 |
| ATOM | 14417 | CG1  | VAL | 956 | 113.255 | 86.901 | 39.429 | 0.00 | 0.00 |
| ATOM | 14418 | 1HG1 | VAL | 956 | 113.475 | 85.888 | 39.766 | 0.00 | 0.00 |
| ATOM | 14419 | 2HG1 | VAL | 956 | 112.967 | 87.539 | 40.265 | 0.00 | 0.00 |
| ATOM | 14420 | 3HG1 | VAL | 956 | 112.303 | 86.811 | 38.907 | 0.00 | 0.00 |
| ATOM | 14421 | CG2  | VAL | 956 | 113.908 | 86.815 | 36.902 | 0.00 | 0.00 |
| ATOM | 14422 | 1HG2 | VAL | 956 | 113.888 | 85.730 | 37.002 | 0.00 | 0.00 |
| ATOM | 14423 | 2HG2 | VAL | 956 | 112.927 | 87.051 | 36.490 | 0.00 | 0.00 |
| ATOM | 14424 | 3HG2 | VAL | 956 | 114.655 | 87.006 | 36.132 | 0.00 | 0.00 |
| ATOM | 14425 | C    | VAL | 956 | 113.051 | 89.699 | 37.675 | 0.00 | 0.00 |
| ATOM | 14426 | O    | VAL | 956 | 112.305 | 90.166 | 38.467 | 0.00 | 0.00 |

|      |       |     |     |     |         |        |        |      |      |
|------|-------|-----|-----|-----|---------|--------|--------|------|------|
| ATOM | 14427 | N   | ALA | 957 | 112.811 | 89.805 | 36.344 | 0.00 | 0.00 |
| ATOM | 14428 | H   | ALA | 957 | 113.434 | 89.452 | 35.632 | 0.00 | 0.00 |
| ATOM | 14429 | CA  | ALA | 957 | 111.627 | 90.527 | 35.798 | 0.00 | 0.00 |
| ATOM | 14430 | HA  | ALA | 957 | 111.628 | 91.427 | 36.412 | 0.00 | 0.00 |
| ATOM | 14431 | CB  | ALA | 957 | 111.833 | 90.819 | 34.326 | 0.00 | 0.00 |
| ATOM | 14432 | HB1 | ALA | 957 | 112.267 | 89.940 | 33.850 | 0.00 | 0.00 |
| ATOM | 14433 | HB2 | ALA | 957 | 110.866 | 90.907 | 33.830 | 0.00 | 0.00 |
| ATOM | 14434 | HB3 | ALA | 957 | 112.336 | 91.733 | 34.011 | 0.00 | 0.00 |
| ATOM | 14435 | C   | ALA | 957 | 110.352 | 89.787 | 36.045 | 0.00 | 0.00 |
| ATOM | 14436 | O   | ALA | 957 | 110.258 | 88.562 | 35.960 | 0.00 | 0.00 |
| ATOM | 14437 | N   | PHE | 958 | 109.253 | 90.498 | 36.395 | 0.00 | 0.00 |
| ATOM | 14438 | H   | PHE | 958 | 109.338 | 91.504 | 36.413 | 0.00 | 0.00 |
| ATOM | 14439 | CA  | PHE | 958 | 107.817 | 89.901 | 36.545 | 0.00 | 0.00 |
| ATOM | 14440 | HA  | PHE | 958 | 107.731 | 89.079 | 37.256 | 0.00 | 0.00 |
| ATOM | 14441 | CB  | PHE | 958 | 106.908 | 91.000 | 37.037 | 0.00 | 0.00 |
| ATOM | 14442 | HB2 | PHE | 958 | 107.137 | 91.945 | 36.544 | 0.00 | 0.00 |
| ATOM | 14443 | HB3 | PHE | 958 | 105.946 | 90.700 | 36.621 | 0.00 | 0.00 |
| ATOM | 14444 | CG  | PHE | 958 | 106.779 | 91.201 | 38.489 | 0.00 | 0.00 |
| ATOM | 14445 | CD1 | PHE | 958 | 105.880 | 90.468 | 39.402 | 0.00 | 0.00 |
| ATOM | 14446 | HD1 | PHE | 958 | 105.259 | 89.698 | 38.969 | 0.00 | 0.00 |
| ATOM | 14447 | CE1 | PHE | 958 | 105.869 | 90.728 | 40.751 | 0.00 | 0.00 |
| ATOM | 14448 | HE1 | PHE | 958 | 105.309 | 90.123 | 41.448 | 0.00 | 0.00 |
| ATOM | 14449 | CZ  | PHE | 958 | 106.746 | 91.712 | 41.314 | 0.00 | 0.00 |
| ATOM | 14450 | HZ  | PHE | 958 | 106.754 | 91.826 | 42.388 | 0.00 | 0.00 |
| ATOM | 14451 | CE2 | PHE | 958 | 107.613 | 92.395 | 40.488 | 0.00 | 0.00 |
| ATOM | 14452 | HE2 | PHE | 958 | 108.309 | 93.083 | 40.945 | 0.00 | 0.00 |

|      |       |     |     |     |         |        |        |      |      |
|------|-------|-----|-----|-----|---------|--------|--------|------|------|
| ATOM | 14453 | CD2 | PHE | 958 | 107.590 | 92.207 | 39.026 | 0.00 | 0.00 |
| ATOM | 14454 | HD2 | PHE | 958 | 108.262 | 92.765 | 38.391 | 0.00 | 0.00 |
| ATOM | 14455 | C   | PHE | 958 | 107.409 | 89.445 | 35.079 | 0.00 | 0.00 |
| ATOM | 14456 | O   | PHE | 958 | 107.772 | 90.176 | 34.137 | 0.00 | 0.00 |
| ATOM | 14457 | N   | ALA | 959 | 106.842 | 88.241 | 34.954 | 0.00 | 0.00 |
| ATOM | 14458 | H   | ALA | 959 | 106.556 | 87.731 | 35.778 | 0.00 | 0.00 |
| ATOM | 14459 | CA  | ALA | 959 | 106.617 | 87.572 | 33.697 | 0.00 | 0.00 |
| ATOM | 14460 | HA  | ALA | 959 | 107.540 | 87.601 | 33.118 | 0.00 | 0.00 |
| ATOM | 14461 | CB  | ALA | 959 | 106.253 | 86.113 | 33.939 | 0.00 | 0.00 |
| ATOM | 14462 | HB1 | ALA | 959 | 105.387 | 86.015 | 34.594 | 0.00 | 0.00 |
| ATOM | 14463 | HB2 | ALA | 959 | 105.991 | 85.611 | 33.008 | 0.00 | 0.00 |
| ATOM | 14464 | HB3 | ALA | 959 | 107.047 | 85.572 | 34.453 | 0.00 | 0.00 |
| ATOM | 14465 | C   | ALA | 959 | 105.480 | 88.282 | 32.862 | 0.00 | 0.00 |
| ATOM | 14466 | O   | ALA | 959 | 104.535 | 88.888 | 33.381 | 0.00 | 0.00 |
| ATOM | 14467 | N   | GLY | 960 | 105.657 | 88.382 | 31.524 | 0.00 | 0.00 |
| ATOM | 14468 | H   | GLY | 960 | 106.411 | 87.871 | 31.087 | 0.00 | 0.00 |
| ATOM | 14469 | CA  | GLY | 960 | 104.880 | 89.161 | 30.651 | 0.00 | 0.00 |
| ATOM | 14470 | HA2 | GLY | 960 | 104.748 | 88.529 | 29.772 | 0.00 | 0.00 |
| ATOM | 14471 | HA3 | GLY | 960 | 103.931 | 89.423 | 31.118 | 0.00 | 0.00 |
| ATOM | 14472 | C   | GLY | 960 | 105.717 | 90.440 | 30.212 | 0.00 | 0.00 |
| ATOM | 14473 | O   | GLY | 960 | 106.952 | 90.460 | 30.183 | 0.00 | 0.00 |
| ATOM | 14474 | N   | HIE | 961 | 105.104 | 91.575 | 29.957 | 0.00 | 0.00 |
| ATOM | 14475 | H   | HIE | 961 | 104.122 | 91.561 | 30.191 | 0.00 | 0.00 |
| ATOM | 14476 | CA  | HIE | 961 | 105.827 | 92.846 | 29.534 | 0.00 | 0.00 |
| ATOM | 14477 | HA  | HIE | 961 | 106.783 | 92.570 | 29.087 | 0.00 | 0.00 |
| ATOM | 14478 | CB  | HIE | 961 | 104.988 | 93.577 | 28.462 | 0.00 | 0.00 |



ATOM 14479 HB2 HIE 961 105.503 94.453 28.068 0.00 0.00  
ATOM 14480 HB3 HIE 961 104.919 92.949 27.573 0.00 0.00  
ATOM 14481 CG HIE 961 103.626 94.083 28.846 0.00 0.00  
ATOM 14482 ND1 HIE 961 102.894 94.983 28.200 0.00 0.00  
ATOM 14483 CE1 HIE 961 101.731 95.158 28.908 0.00 0.00  
ATOM 14484 HE1 HIE 961 100.880 95.717 28.548 0.00 0.00  
ATOM 14485 NE2 HIE 961 101.776 94.446 30.034 0.00 0.00  
ATOM 14486 HE2 HIE 961 101.011 94.366 30.689 0.00 0.00  
ATOM 14487 CD2 HIE 961 102.928 93.719 29.998 0.00 0.00  
ATOM 14488 HD2 HIE 961 103.290 93.044 30.759 0.00 0.00  
ATOM 14489 C HIE 961 106.170 93.804 30.689 0.00 0.00  
ATOM 14490 O HIE 961 106.597 94.907 30.413 0.00 0.00  
ATOM 14491 N ARG 962 106.025 93.315 31.921 0.00 0.00  
ATOM 14492 H ARG 962 105.547 92.433 32.040 0.00 0.00  
ATOM 14493 CA ARG 962 106.451 93.797 33.213 0.00 0.00  
ATOM 14494 HA ARG 962 105.938 93.211 33.975 0.00 0.00  
ATOM 14495 CB ARG 962 107.894 93.494 33.591 0.00 0.00  
ATOM 14496 HB2 ARG 962 108.042 93.466 34.671 0.00 0.00  
ATOM 14497 HB3 ARG 962 108.128 92.456 33.352 0.00 0.00  
ATOM 14498 CG ARG 962 108.996 94.472 33.039 0.00 0.00  
ATOM 14499 HG2 ARG 962 108.909 94.256 31.974 0.00 0.00  
ATOM 14500 HG3 ARG 962 108.742 95.496 33.314 0.00 0.00  
ATOM 14501 CD ARG 962 110.476 94.104 33.412 0.00 0.00  
ATOM 14502 HD2 ARG 962 110.569 94.059 34.497 0.00 0.00  
ATOM 14503 HD3 ARG 962 110.769 93.132 33.016 0.00 0.00  
ATOM 14504 NE ARG 962 111.328 95.260 33.034 0.00 0.00

ATOM 14505 HE ARG 962 111.632 95.944 33.711 0.00 0.00  
ATOM 14506 CZ ARG 962 112.187 95.230 32.067 0.00 0.00  
ATOM 14507 NH1 ARG 962 112.160 94.337 31.066 0.00 0.00  
ATOM 14508 1HH1 ARG 962 112.597 94.596 30.193 0.00 0.00  
ATOM 14509 2HH1 ARG 962 111.429 93.642 31.100 0.00 0.00  
ATOM 14510 NH2 ARG 962 113.058 96.224 32.013 0.00 0.00  
ATOM 14511 1HH2 ARG 962 113.618 96.301 31.176 0.00 0.00  
ATOM 14512 2HH2 ARG 962 113.143 96.909 32.751 0.00 0.00  
ATOM 14513 C ARG 962 105.969 95.162 33.683 0.00 0.00  
ATOM 14514 O ARG 962 106.337 95.570 34.786 0.00 0.00  
ATOM 14515 N ALA 963 105.123 95.750 32.854 0.00 0.00  
ATOM 14516 H ALA 963 105.086 95.389 31.912 0.00 0.00  
ATOM 14517 CA ALA 963 104.374 96.955 33.303 0.00 0.00  
ATOM 14518 HA ALA 963 105.103 97.628 33.755 0.00 0.00  
ATOM 14519 CB ALA 963 103.617 97.448 31.994 0.00 0.00  
ATOM 14520 HB1 ALA 963 102.766 96.812 31.752 0.00 0.00  
ATOM 14521 HB2 ALA 963 103.358 98.501 32.107 0.00 0.00  
ATOM 14522 HB3 ALA 963 104.352 97.441 31.190 0.00 0.00  
ATOM 14523 C ALA 963 103.422 96.551 34.442 0.00 0.00  
ATOM 14524 O ALA 963 102.520 95.724 34.257 0.00 0.00  
ATOM 14525 N VAL 964 103.542 97.302 35.520 0.00 0.00  
ATOM 14526 H VAL 964 104.099 98.143 35.486 0.00 0.00  
ATOM 14527 CA VAL 964 102.880 97.011 36.806 0.00 0.00  
ATOM 14528 HA VAL 964 102.126 96.237 36.658 0.00 0.00  
ATOM 14529 CB VAL 964 103.800 96.373 37.815 0.00 0.00  
ATOM 14530 HB VAL 964 103.194 96.363 38.721 0.00 0.00

|      |       |      |     |     |         |         |        |      |      |
|------|-------|------|-----|-----|---------|---------|--------|------|------|
| ATOM | 14531 | CG1  | VAL | 964 | 104.179 | 94.946  | 37.584 | 0.00 | 0.00 |
| ATOM | 14532 | 1HG1 | VAL | 964 | 104.637 | 94.756  | 36.614 | 0.00 | 0.00 |
| ATOM | 14533 | 2HG1 | VAL | 964 | 104.827 | 94.629  | 38.401 | 0.00 | 0.00 |
| ATOM | 14534 | 3HG1 | VAL | 964 | 103.332 | 94.263  | 37.644 | 0.00 | 0.00 |
| ATOM | 14535 | CG2  | VAL | 964 | 105.093 | 97.126  | 38.161 | 0.00 | 0.00 |
| ATOM | 14536 | 1HG2 | VAL | 964 | 105.684 | 96.700  | 38.971 | 0.00 | 0.00 |
| ATOM | 14537 | 2HG2 | VAL | 964 | 105.816 | 97.127  | 37.345 | 0.00 | 0.00 |
| ATOM | 14538 | 3HG2 | VAL | 964 | 105.022 | 98.198  | 38.348 | 0.00 | 0.00 |
| ATOM | 14539 | C    | VAL | 964 | 102.123 | 98.160  | 37.345 | 0.00 | 0.00 |
| ATOM | 14540 | O    | VAL | 964 | 102.242 | 99.249  | 36.777 | 0.00 | 0.00 |
| ATOM | 14541 | N    | PHE | 965 | 101.337 | 97.821  | 38.408 | 0.00 | 0.00 |
| ATOM | 14542 | H    | PHE | 965 | 101.303 | 96.854  | 38.699 | 0.00 | 0.00 |
| ATOM | 14543 | CA   | PHE | 965 | 100.620 | 98.753  | 39.289 | 0.00 | 0.00 |
| ATOM | 14544 | HA   | PHE | 965 | 101.310 | 99.588  | 39.411 | 0.00 | 0.00 |
| ATOM | 14545 | CB   | PHE | 965 | 99.309  | 99.330  | 38.640 | 0.00 | 0.00 |
| ATOM | 14546 | HB2  | PHE | 965 | 99.556  | 99.539  | 37.599 | 0.00 | 0.00 |
| ATOM | 14547 | HB3  | PHE | 965 | 98.628  | 98.487  | 38.530 | 0.00 | 0.00 |
| ATOM | 14548 | CG   | PHE | 965 | 98.647  | 100.574 | 39.323 | 0.00 | 0.00 |
| ATOM | 14549 | CD1  | PHE | 965 | 99.393  | 101.753 | 39.654 | 0.00 | 0.00 |
| ATOM | 14550 | HD1  | PHE | 965 | 100.437 | 101.852 | 39.397 | 0.00 | 0.00 |
| ATOM | 14551 | CE1  | PHE | 965 | 98.775  | 102.804 | 40.378 | 0.00 | 0.00 |
| ATOM | 14552 | HE1  | PHE | 965 | 99.371  | 103.628 | 40.742 | 0.00 | 0.00 |
| ATOM | 14553 | CZ   | PHE | 965 | 97.457  | 102.685 | 40.806 | 0.00 | 0.00 |
| ATOM | 14554 | HZ   | PHE | 965 | 97.096  | 103.497 | 41.420 | 0.00 | 0.00 |
| ATOM | 14555 | CE2  | PHE | 965 | 96.687  | 101.544 | 40.499 | 0.00 | 0.00 |
| ATOM | 14556 | HE2  | PHE | 965 | 95.626  | 101.554 | 40.704 | 0.00 | 0.00 |

ATOM 14557 CD2 PHE 965 97.325 100.503 39.809 0.00 0.00  
ATOM 14558 HD2 PHE 965 96.665 99.658 39.678 0.00 0.00  
ATOM 14559 C PHE 965 100.400 98.109 40.641 0.00 0.00  
ATOM 14560 O PHE 965 101.041 97.048 40.881 0.00 0.00  
ATOM 14561 N GLY 966 99.665 98.697 41.602 0.00 0.00  
ATOM 14562 H GLY 966 99.065 99.482 41.396 0.00 0.00  
ATOM 14563 CA GLY 966 99.796 98.366 43.025 0.00 0.00  
ATOM 14564 HA2 GLY 966 98.979 98.788 43.611 0.00 0.00  
ATOM 14565 HA3 GLY 966 99.796 97.282 43.140 0.00 0.00  
ATOM 14566 C GLY 966 101.051 98.945 43.613 0.00 0.00  
ATOM 14567 O GLY 966 101.671 99.831 43.007 0.00 0.00  
ATOM 14568 N PHE 967 101.567 98.297 44.650 0.00 0.00  
ATOM 14569 H PHE 967 101.034 97.515 45.002 0.00 0.00  
ATOM 14570 CA PHE 967 102.808 98.743 45.313 0.00 0.00  
ATOM 14571 HA PHE 967 102.829 98.114 46.203 0.00 0.00  
ATOM 14572 CB PHE 967 104.032 98.333 44.460 0.00 0.00  
ATOM 14573 HB2 PHE 967 104.037 98.996 43.594 0.00 0.00  
ATOM 14574 HB3 PHE 967 104.901 98.488 45.098 0.00 0.00  
ATOM 14575 CG PHE 967 104.137 96.930 43.886 0.00 0.00  
ATOM 14576 CD1 PHE 967 103.829 96.792 42.555 0.00 0.00  
ATOM 14577 HD1 PHE 967 103.598 97.669 41.968 0.00 0.00  
ATOM 14578 CE1 PHE 967 103.844 95.571 41.861 0.00 0.00  
ATOM 14579 HE1 PHE 967 103.521 95.488 40.834 0.00 0.00  
ATOM 14580 CZ PHE 967 104.372 94.434 42.589 0.00 0.00  
ATOM 14581 HZ PHE 967 104.585 93.470 42.151 0.00 0.00  
ATOM 14582 CE2 PHE 967 104.697 94.579 43.936 0.00 0.00

|      |       |      |     |     |         |         |        |      |      |
|------|-------|------|-----|-----|---------|---------|--------|------|------|
| ATOM | 14583 | HE2  | PHE | 967 | 105.101 | 93.728  | 44.465 | 0.00 | 0.00 |
| ATOM | 14584 | CD2  | PHE | 967 | 104.557 | 95.798  | 44.612 | 0.00 | 0.00 |
| ATOM | 14585 | HD2  | PHE | 967 | 104.652 | 95.909  | 45.682 | 0.00 | 0.00 |
| ATOM | 14586 | C    | PHE | 967 | 102.694 | 100.170 | 45.884 | 0.00 | 0.00 |
| ATOM | 14587 | O    | PHE | 967 | 101.859 | 100.499 | 46.769 | 0.00 | 0.00 |
| ATOM | 14588 | N    | ARG | 968 | 103.660 | 101.070 | 45.550 | 0.00 | 0.00 |
| ATOM | 14589 | H    | ARG | 968 | 104.332 | 100.841 | 44.831 | 0.00 | 0.00 |
| ATOM | 14590 | CA   | ARG | 968 | 103.600 | 102.517 | 45.868 | 0.00 | 0.00 |
| ATOM | 14591 | HA   | ARG | 968 | 103.058 | 102.749 | 46.785 | 0.00 | 0.00 |
| ATOM | 14592 | CB   | ARG | 968 | 104.881 | 103.023 | 46.449 | 0.00 | 0.00 |
| ATOM | 14593 | HB2  | ARG | 968 | 105.507 | 103.144 | 45.565 | 0.00 | 0.00 |
| ATOM | 14594 | HB3  | ARG | 968 | 104.665 | 104.050 | 46.744 | 0.00 | 0.00 |
| ATOM | 14595 | CG   | ARG | 968 | 105.642 | 102.200 | 47.518 | 0.00 | 0.00 |
| ATOM | 14596 | HG2  | ARG | 968 | 105.023 | 102.337 | 48.405 | 0.00 | 0.00 |
| ATOM | 14597 | HG3  | ARG | 968 | 105.759 | 101.134 | 47.320 | 0.00 | 0.00 |
| ATOM | 14598 | CD   | ARG | 968 | 107.015 | 102.894 | 47.680 | 0.00 | 0.00 |
| ATOM | 14599 | HD2  | ARG | 968 | 107.551 | 102.460 | 48.524 | 0.00 | 0.00 |
| ATOM | 14600 | HD3  | ARG | 968 | 107.609 | 102.716 | 46.784 | 0.00 | 0.00 |
| ATOM | 14601 | NE   | ARG | 968 | 106.937 | 104.390 | 47.813 | 0.00 | 0.00 |
| ATOM | 14602 | HE   | ARG | 968 | 107.240 | 104.969 | 47.044 | 0.00 | 0.00 |
| ATOM | 14603 | CZ   | ARG | 968 | 106.722 | 104.981 | 48.990 | 0.00 | 0.00 |
| ATOM | 14604 | NH1  | ARG | 968 | 106.618 | 106.285 | 48.910 | 0.00 | 0.00 |
| ATOM | 14605 | 1HH1 | ARG | 968 | 106.722 | 106.879 | 49.721 | 0.00 | 0.00 |
| ATOM | 14606 | 2HH1 | ARG | 968 | 106.697 | 106.687 | 47.987 | 0.00 | 0.00 |
| ATOM | 14607 | NH2  | ARG | 968 | 106.504 | 104.411 | 50.124 | 0.00 | 0.00 |
| ATOM | 14608 | 1HH2 | ARG | 968 | 106.184 | 105.008 | 50.873 | 0.00 | 0.00 |

ATOM 14609 2HH2 ARG 968 106.430 103.408 50.217 0.00 0.00  
ATOM 14610 C ARG 968 103.031 103.473 44.828 0.00 0.00  
ATOM 14611 O ARG 968 102.700 104.618 45.127 0.00 0.00  
ATOM 14612 N GLY 969 103.001 102.980 43.592 0.00 0.00  
ATOM 14613 H GLY 969 103.392 102.064 43.422 0.00 0.00  
ATOM 14614 CA GLY 969 102.258 103.662 42.552 0.00 0.00  
ATOM 14615 HA2 GLY 969 101.726 102.915 41.963 0.00 0.00  
ATOM 14616 HA3 GLY 969 101.485 104.236 43.064 0.00 0.00  
ATOM 14617 C GLY 969 103.152 104.579 41.696 0.00 0.00  
ATOM 14618 O GLY 969 102.656 105.521 41.153 0.00 0.00  
ATOM 14619 N GLU 970 104.436 104.388 41.702 0.00 0.00  
ATOM 14620 H GLU 970 104.751 103.604 42.255 0.00 0.00  
ATOM 14621 CA GLU 970 105.548 105.408 41.576 0.00 0.00  
ATOM 14622 HA GLU 970 104.997 106.345 41.497 0.00 0.00  
ATOM 14623 CB GLU 970 106.483 105.275 42.753 0.00 0.00  
ATOM 14624 HB2 GLU 970 106.655 104.233 43.020 0.00 0.00  
ATOM 14625 HB3 GLU 970 107.419 105.776 42.502 0.00 0.00  
ATOM 14626 CG GLU 970 105.840 105.939 44.018 0.00 0.00  
ATOM 14627 HG2 GLU 970 105.700 106.955 43.648 0.00 0.00  
ATOM 14628 HG3 GLU 970 104.879 105.496 44.278 0.00 0.00  
ATOM 14629 CD GLU 970 106.837 106.126 45.160 0.00 0.00  
ATOM 14630 OE1 GLU 970 106.637 106.955 46.070 0.00 0.00  
ATOM 14631 OE2 GLU 970 107.830 105.370 45.260 0.00 0.00  
ATOM 14632 C GLU 970 106.307 105.165 40.266 0.00 0.00  
ATOM 14633 O GLU 970 106.534 106.067 39.491 0.00 0.00  
ATOM 14634 N VAL 971 106.760 103.902 40.032 0.00 0.00

ATOM 14635 H VAL 971 106.507 103.124 40.623 0.00 0.00  
ATOM 14636 CA VAL 971 107.613 103.593 38.919 0.00 0.00  
ATOM 14637 HA VAL 971 107.876 104.498 38.370 0.00 0.00  
ATOM 14638 CB VAL 971 108.921 102.950 39.428 0.00 0.00  
ATOM 14639 HB VAL 971 108.562 101.982 39.777 0.00 0.00  
ATOM 14640 CG1 VAL 971 109.910 102.715 38.214 0.00 0.00  
ATOM 14641 1HG1 VAL 971 110.591 103.565 38.177 0.00 0.00  
ATOM 14642 2HG1 VAL 971 110.474 101.788 38.315 0.00 0.00  
ATOM 14643 3HG1 VAL 971 109.377 102.701 37.263 0.00 0.00  
ATOM 14644 CG2 VAL 971 109.598 103.588 40.639 0.00 0.00  
ATOM 14645 1HG2 VAL 971 109.341 103.149 41.603 0.00 0.00  
ATOM 14646 2HG2 VAL 971 110.679 103.511 40.523 0.00 0.00  
ATOM 14647 3HG2 VAL 971 109.322 104.642 40.642 0.00 0.00  
ATOM 14648 C VAL 971 106.910 102.702 37.901 0.00 0.00  
ATOM 14649 O VAL 971 107.040 102.972 36.705 0.00 0.00  
ATOM 14650 N MET 972 106.033 101.766 38.299 0.00 0.00  
ATOM 14651 H MET 972 105.963 101.682 39.303 0.00 0.00  
ATOM 14652 CA MET 972 105.066 101.043 37.418 0.00 0.00  
ATOM 14653 HA MET 972 104.515 100.373 38.079 0.00 0.00  
ATOM 14654 CB MET 972 103.950 102.017 37.010 0.00 0.00  
ATOM 14655 HB2 MET 972 104.347 102.774 36.333 0.00 0.00  
ATOM 14656 HB3 MET 972 103.153 101.530 36.448 0.00 0.00  
ATOM 14657 CG MET 972 103.354 102.779 38.181 0.00 0.00  
ATOM 14658 HG2 MET 972 102.611 102.101 38.601 0.00 0.00  
ATOM 14659 HG3 MET 972 104.001 102.991 39.031 0.00 0.00  
ATOM 14660 SD MET 972 102.692 104.397 37.939 0.00 0.00

ATOM 14661 CE MET 972 101.191 103.834 37.187 0.00 0.00  
ATOM 14662 HE1 MET 972 100.749 104.688 36.674 0.00 0.00  
ATOM 14663 HE2 MET 972 101.427 103.033 36.487 0.00 0.00  
ATOM 14664 HE3 MET 972 100.439 103.571 37.931 0.00 0.00  
ATOM 14665 C MET 972 105.741 100.185 36.365 0.00 0.00  
ATOM 14666 O MET 972 105.028 99.605 35.545 0.00 0.00  
ATOM 14667 N GLY 973 107.000 99.755 36.498 0.00 0.00  
ATOM 14668 H GLY 973 107.553 100.177 37.230 0.00 0.00  
ATOM 14669 CA GLY 973 107.658 99.062 35.431 0.00 0.00  
ATOM 14670 HA2 GLY 973 108.655 98.769 35.759 0.00 0.00  
ATOM 14671 HA3 GLY 973 107.126 98.144 35.182 0.00 0.00  
ATOM 14672 C GLY 973 107.820 99.913 34.208 0.00 0.00  
ATOM 14673 O GLY 973 107.954 101.109 34.390 0.00 0.00  
ATOM 14674 N PRO 974 107.890 99.385 33.010 0.00 0.00  
ATOM 14675 CD PRO 974 108.239 98.023 32.695 0.00 0.00  
ATOM 14676 HD2 PRO 974 109.110 97.715 33.273 0.00 0.00  
ATOM 14677 HD3 PRO 974 107.460 97.323 32.996 0.00 0.00  
ATOM 14678 CG PRO 974 108.482 97.893 31.178 0.00 0.00  
ATOM 14679 HG2 PRO 974 109.468 97.462 31.008 0.00 0.00  
ATOM 14680 HG3 PRO 974 107.715 97.246 30.751 0.00 0.00  
ATOM 14681 CB PRO 974 108.466 99.254 30.626 0.00 0.00  
ATOM 14682 HB2 PRO 974 109.460 99.543 30.285 0.00 0.00  
ATOM 14683 HB3 PRO 974 107.803 99.324 29.764 0.00 0.00  
ATOM 14684 CA PRO 974 108.098 100.175 31.801 0.00 0.00  
ATOM 14685 HA PRO 974 108.866 100.897 32.079 0.00 0.00  
ATOM 14686 C PRO 974 106.940 100.945 31.326 0.00 0.00



|      |       |      |     |     |         |         |        |      |      |
|------|-------|------|-----|-----|---------|---------|--------|------|------|
| ATOM | 14687 | O    | PRO | 974 | 105.843 | 100.849 | 31.869 | 0.00 | 0.00 |
| ATOM | 14688 | N    | LEC | 975 | 107.177 | 101.874 | 30.336 | 0.00 | 0.00 |
| ATOM | 14689 | H    | LEC | 975 | 108.096 | 101.947 | 29.922 | 0.00 | 0.00 |
| ATOM | 14690 | CA   | LEC | 975 | 106.199 | 102.676 | 29.530 | 0.00 | 0.00 |
| ATOM | 14691 | HA   | LEC | 975 | 105.353 | 102.919 | 30.173 | 0.00 | 0.00 |
| ATOM | 14692 | CB   | LEC | 975 | 106.921 | 103.945 | 29.252 | 0.00 | 0.00 |
| ATOM | 14693 | HB2  | LEC | 975 | 107.189 | 104.361 | 30.223 | 0.00 | 0.00 |
| ATOM | 14694 | HB3  | LEC | 975 | 107.823 | 103.762 | 28.669 | 0.00 | 0.00 |
| ATOM | 14695 | CG   | LEC | 975 | 106.131 | 105.005 | 28.498 | 0.00 | 0.00 |
| ATOM | 14696 | HG   | LEC | 975 | 105.797 | 104.568 | 27.557 | 0.00 | 0.00 |
| ATOM | 14697 | CD1  | LEC | 975 | 104.909 | 105.483 | 29.304 | 0.00 | 0.00 |
| ATOM | 14698 | 1HD1 | LEC | 975 | 104.370 | 106.172 | 28.654 | 0.00 | 0.00 |
| ATOM | 14699 | 2HD1 | LEC | 975 | 104.260 | 104.621 | 29.462 | 0.00 | 0.00 |
| ATOM | 14700 | 3HD1 | LEC | 975 | 105.100 | 105.964 | 30.263 | 0.00 | 0.00 |
| ATOM | 14701 | CD2  | LEC | 975 | 107.041 | 106.168 | 28.198 | 0.00 | 0.00 |
| ATOM | 14702 | 1HD2 | LEC | 975 | 107.453 | 106.471 | 29.161 | 0.00 | 0.00 |
| ATOM | 14703 | 2HD2 | LEC | 975 | 107.870 | 105.930 | 27.532 | 0.00 | 0.00 |
| ATOM | 14704 | 3HD2 | LEC | 975 | 106.490 | 107.047 | 27.863 | 0.00 | 0.00 |
| ATOM | 14705 | C    | LEC | 975 | 105.782 | 101.929 | 28.293 | 0.00 | 0.00 |
| ATOM | 14706 | O    | LEC | 975 | 106.649 | 101.513 | 27.459 | 0.00 | 0.00 |
| ATOM | 14707 | OXT  | LEC | 975 | 104.562 | 101.838 | 28.081 | 0.00 | 0.00 |
| ATOM | 14708 | N    | SEN | 976 | 119.583 | 81.590  | 40.296 | 0.00 | 0.00 |
| ATOM | 14709 | H1   | SEN | 976 | 118.811 | 82.239  | 40.341 | 0.00 | 0.00 |
| ATOM | 14710 | H2   | SEN | 976 | 119.259 | 80.830  | 39.715 | 0.00 | 0.00 |
| ATOM | 14711 | H3   | SEN | 976 | 120.471 | 81.900  | 39.927 | 0.00 | 0.00 |
| ATOM | 14712 | CA   | SEN | 976 | 119.622 | 81.170  | 41.672 | 0.00 | 0.00 |

|      |       |      |     |     |         |        |        |      |      |
|------|-------|------|-----|-----|---------|--------|--------|------|------|
| ATOM | 14713 | HA   | SEN | 976 | 120.671 | 81.155 | 41.965 | 0.00 | 0.00 |
| ATOM | 14714 | CB   | SEN | 976 | 118.881 | 82.143 | 42.631 | 0.00 | 0.00 |
| ATOM | 14715 | HB2  | SEN | 976 | 118.768 | 81.620 | 43.581 | 0.00 | 0.00 |
| ATOM | 14716 | HB3  | SEN | 976 | 119.510 | 83.027 | 42.738 | 0.00 | 0.00 |
| ATOM | 14717 | OG   | SEN | 976 | 117.646 | 82.508 | 42.065 | 0.00 | 0.00 |
| ATOM | 14718 | HG   | SEN | 976 | 117.414 | 83.320 | 42.521 | 0.00 | 0.00 |
| ATOM | 14719 | C    | SEN | 976 | 118.962 | 79.824 | 41.745 | 0.00 | 0.00 |
| ATOM | 14720 | O    | SEN | 976 | 117.881 | 79.521 | 41.252 | 0.00 | 0.00 |
| ATOM | 14721 | N    | ASN | 977 | 119.593 | 78.885 | 42.516 | 0.00 | 0.00 |
| ATOM | 14722 | H    | ASN | 977 | 120.440 | 79.259 | 42.920 | 0.00 | 0.00 |
| ATOM | 14723 | CA   | ASN | 977 | 119.123 | 77.445 | 42.737 | 0.00 | 0.00 |
| ATOM | 14724 | HA   | ASN | 977 | 118.051 | 77.401 | 42.546 | 0.00 | 0.00 |
| ATOM | 14725 | CB   | ASN | 977 | 119.742 | 76.508 | 41.654 | 0.00 | 0.00 |
| ATOM | 14726 | HB2  | ASN | 977 | 119.087 | 75.641 | 41.572 | 0.00 | 0.00 |
| ATOM | 14727 | HB3  | ASN | 977 | 119.632 | 76.955 | 40.666 | 0.00 | 0.00 |
| ATOM | 14728 | CG   | ASN | 977 | 121.187 | 76.127 | 42.080 | 0.00 | 0.00 |
| ATOM | 14729 | OD1  | ASN | 977 | 121.431 | 75.266 | 42.934 | 0.00 | 0.00 |
| ATOM | 14730 | ND2  | ASN | 977 | 122.210 | 76.664 | 41.550 | 0.00 | 0.00 |
| ATOM | 14731 | 1HD2 | ASN | 977 | 123.128 | 76.398 | 41.876 | 0.00 | 0.00 |
| ATOM | 14732 | 2HD2 | ASN | 977 | 122.006 | 77.224 | 40.734 | 0.00 | 0.00 |
| ATOM | 14733 | C    | ASN | 977 | 119.302 | 77.164 | 44.299 | 0.00 | 0.00 |
| ATOM | 14734 | O    | ASN | 977 | 120.330 | 77.546 | 44.921 | 0.00 | 0.00 |
| ATOM | 14735 | N    | ILE | 978 | 118.326 | 76.453 | 44.901 | 0.00 | 0.00 |
| ATOM | 14736 | H    | ILE | 978 | 117.570 | 76.236 | 44.267 | 0.00 | 0.00 |
| ATOM | 14737 | CA   | ILE | 978 | 118.394 | 75.777 | 46.222 | 0.00 | 0.00 |
| ATOM | 14738 | HA   | ILE | 978 | 119.372 | 75.952 | 46.671 | 0.00 | 0.00 |

ATOM 14739 CB ILE 978 117.356 76.385 47.151 0.00 0.00  
ATOM 14740 HB ILE 978 117.451 75.850 48.096 0.00 0.00  
ATOM 14741 CG2 ILE 978 117.524 77.811 47.566 0.00 0.00  
ATOM 14742 1HG2 ILE 978 117.499 78.462 46.692 0.00 0.00  
ATOM 14743 2HG2 ILE 978 116.858 78.133 48.366 0.00 0.00  
ATOM 14744 3HG2 ILE 978 118.534 77.949 47.954 0.00 0.00  
ATOM 14745 CG1 ILE 978 115.898 76.188 46.711 0.00 0.00  
ATOM 14746 2HG1 ILE 978 115.656 76.948 45.967 0.00 0.00  
ATOM 14747 3HG1 ILE 978 115.885 75.275 46.116 0.00 0.00  
ATOM 14748 CD1 ILE 978 114.948 76.281 47.911 0.00 0.00  
ATOM 14749 1HD1 ILE 978 114.929 77.225 48.456 0.00 0.00  
ATOM 14750 2HD1 ILE 978 113.921 76.068 47.614 0.00 0.00  
ATOM 14751 3HD1 ILE 978 115.166 75.545 48.686 0.00 0.00  
ATOM 14752 C ILE 978 118.258 74.251 46.072 0.00 0.00  
ATOM 14753 O ILE 978 117.845 73.800 44.982 0.00 0.00  
ATOM 14754 N SER 979 118.594 73.517 47.112 0.00 0.00  
ATOM 14755 H SER 979 118.839 73.993 47.968 0.00 0.00  
ATOM 14756 CA SER 979 118.329 72.059 47.085 0.00 0.00  
ATOM 14757 HA SER 979 118.717 71.619 46.167 0.00 0.00  
ATOM 14758 CB SER 979 118.955 71.309 48.243 0.00 0.00  
ATOM 14759 HB2 SER 979 118.813 70.238 48.103 0.00 0.00  
ATOM 14760 HB3 SER 979 120.008 71.586 48.203 0.00 0.00  
ATOM 14761 OG SER 979 118.346 71.705 49.396 0.00 0.00  
ATOM 14762 HG SER 979 118.954 71.507 50.112 0.00 0.00  
ATOM 14763 C SER 979 116.885 71.663 47.053 0.00 0.00  
ATOM 14764 O SER 979 115.987 72.333 47.625 0.00 0.00

ATOM 14765 N ARG 980 116.539 70.592 46.420 0.00 0.00  
ATOM 14766 H ARG 980 117.190 70.015 45.907 0.00 0.00  
ATOM 14767 CA ARG 980 115.164 70.070 46.370 0.00 0.00  
ATOM 14768 HA ARG 980 114.494 70.839 45.985 0.00 0.00  
ATOM 14769 CB ARG 980 115.070 68.956 45.382 0.00 0.00  
ATOM 14770 HB2 ARG 980 115.267 69.469 44.440 0.00 0.00  
ATOM 14771 HB3 ARG 980 115.794 68.142 45.416 0.00 0.00  
ATOM 14772 CG ARG 980 113.700 68.260 45.347 0.00 0.00  
ATOM 14773 HG2 ARG 980 112.872 68.965 45.278 0.00 0.00  
ATOM 14774 HG3 ARG 980 113.455 67.775 46.292 0.00 0.00  
ATOM 14775 CD ARG 980 113.638 67.228 44.159 0.00 0.00  
ATOM 14776 HD2 ARG 980 113.706 67.836 43.257 0.00 0.00  
ATOM 14777 HD3 ARG 980 114.566 66.664 44.253 0.00 0.00  
ATOM 14778 NE ARG 980 112.449 66.359 44.330 0.00 0.00  
ATOM 14779 HE ARG 980 112.194 66.180 45.291 0.00 0.00  
ATOM 14780 CZ ARG 980 111.827 65.726 43.350 0.00 0.00  
ATOM 14781 NH1 ARG 980 112.192 65.716 42.087 0.00 0.00  
ATOM 14782 1HH1 ARG 980 111.838 65.023 41.443 0.00 0.00  
ATOM 14783 2HH1 ARG 980 112.865 66.396 41.766 0.00 0.00  
ATOM 14784 NH2 ARG 980 110.827 64.923 43.588 0.00 0.00  
ATOM 14785 1HH2 ARG 980 110.260 64.517 42.857 0.00 0.00  
ATOM 14786 2HH2 ARG 980 110.667 64.665 44.552 0.00 0.00  
ATOM 14787 C ARG 980 114.707 69.638 47.772 0.00 0.00  
ATOM 14788 O ARG 980 113.504 69.728 48.112 0.00 0.00  
ATOM 14789 N GLN 981 115.635 69.275 48.631 0.00 0.00  
ATOM 14790 H GLN 981 116.583 69.272 48.281 0.00 0.00

|      |       |      |     |     |         |        |        |      |      |
|------|-------|------|-----|-----|---------|--------|--------|------|------|
| ATOM | 14791 | CA   | GLN | 981 | 115.411 | 69.000 | 50.012 | 0.00 | 0.00 |
| ATOM | 14792 | HA   | GLN | 981 | 114.565 | 68.312 | 50.028 | 0.00 | 0.00 |
| ATOM | 14793 | CB   | GLN | 981 | 116.517 | 68.161 | 50.627 | 0.00 | 0.00 |
| ATOM | 14794 | HB2  | GLN | 981 | 117.379 | 68.819 | 50.737 | 0.00 | 0.00 |
| ATOM | 14795 | HB3  | GLN | 981 | 116.197 | 68.022 | 51.660 | 0.00 | 0.00 |
| ATOM | 14796 | CG   | GLN | 981 | 116.912 | 66.863 | 49.938 | 0.00 | 0.00 |
| ATOM | 14797 | HG2  | GLN | 981 | 117.404 | 66.224 | 50.671 | 0.00 | 0.00 |
| ATOM | 14798 | HG3  | GLN | 981 | 116.057 | 66.376 | 49.468 | 0.00 | 0.00 |
| ATOM | 14799 | CD   | GLN | 981 | 117.965 | 67.031 | 48.805 | 0.00 | 0.00 |
| ATOM | 14800 | OE1  | GLN | 981 | 117.775 | 67.799 | 47.872 | 0.00 | 0.00 |
| ATOM | 14801 | NE2  | GLN | 981 | 119.071 | 66.343 | 48.708 | 0.00 | 0.00 |
| ATOM | 14802 | 1HE2 | GLN | 981 | 119.703 | 66.574 | 47.955 | 0.00 | 0.00 |
| ATOM | 14803 | 2HE2 | GLN | 981 | 119.202 | 65.603 | 49.382 | 0.00 | 0.00 |
| ATOM | 14804 | C    | GLN | 981 | 115.030 | 70.206 | 50.844 | 0.00 | 0.00 |
| ATOM | 14805 | O    | GLN | 981 | 114.003 | 70.122 | 51.582 | 0.00 | 0.00 |
| ATOM | 14806 | N    | ALA | 982 | 115.583 | 71.376 | 50.691 | 0.00 | 0.00 |
| ATOM | 14807 | H    | ALA | 982 | 116.437 | 71.344 | 50.154 | 0.00 | 0.00 |
| ATOM | 14808 | CA   | ALA | 982 | 115.058 | 72.564 | 51.351 | 0.00 | 0.00 |
| ATOM | 14809 | HA   | ALA | 982 | 114.833 | 72.235 | 52.366 | 0.00 | 0.00 |
| ATOM | 14810 | CB   | ALA | 982 | 116.255 | 73.614 | 51.462 | 0.00 | 0.00 |
| ATOM | 14811 | HB1  | ALA | 982 | 115.988 | 74.558 | 51.938 | 0.00 | 0.00 |
| ATOM | 14812 | HB2  | ALA | 982 | 116.987 | 73.066 | 52.055 | 0.00 | 0.00 |
| ATOM | 14813 | HB3  | ALA | 982 | 116.641 | 73.865 | 50.474 | 0.00 | 0.00 |
| ATOM | 14814 | C    | ALA | 982 | 113.783 | 73.043 | 50.710 | 0.00 | 0.00 |
| ATOM | 14815 | O    | ALA | 982 | 112.842 | 73.384 | 51.467 | 0.00 | 0.00 |
| ATOM | 14816 | N    | TYR | 983 | 113.624 | 73.045 | 49.375 | 0.00 | 0.00 |

ATOM 14817 H TYR 983 114.357 72.548 48.889 0.00 0.00  
ATOM 14818 CA TYR 983 112.352 73.238 48.594 0.00 0.00  
ATOM 14819 HA TYR 983 112.156 74.311 48.605 0.00 0.00  
ATOM 14820 CB TYR 983 112.597 72.903 47.082 0.00 0.00  
ATOM 14821 HB2 TYR 983 113.556 73.315 46.768 0.00 0.00  
ATOM 14822 HB3 TYR 983 112.621 71.814 47.040 0.00 0.00  
ATOM 14823 CG TYR 983 111.575 73.363 46.152 0.00 0.00  
ATOM 14824 CD1 TYR 983 111.526 74.706 45.704 0.00 0.00  
ATOM 14825 HD1 TYR 983 112.224 75.444 46.073 0.00 0.00  
ATOM 14826 CE1 TYR 983 110.453 75.112 44.872 0.00 0.00  
ATOM 14827 HE1 TYR 983 110.471 76.148 44.570 0.00 0.00  
ATOM 14828 CZ TYR 983 109.315 74.328 44.605 0.00 0.00  
ATOM 14829 OH TYR 983 108.257 74.787 43.968 0.00 0.00  
ATOM 14830 HH TYR 983 108.306 75.731 43.803 0.00 0.00  
ATOM 14831 CE2 TYR 983 109.390 72.966 45.050 0.00 0.00  
ATOM 14832 HE2 TYR 983 108.458 72.421 45.042 0.00 0.00  
ATOM 14833 CD2 TYR 983 110.495 72.552 45.777 0.00 0.00  
ATOM 14834 HD2 TYR 983 110.639 71.508 46.015 0.00 0.00  
ATOM 14835 C TYR 983 111.165 72.488 49.061 0.00 0.00  
ATOM 14836 O TYR 983 110.305 73.177 49.621 0.00 0.00  
ATOM 14837 N ALA 984 111.108 71.160 49.086 0.00 0.00  
ATOM 14838 H ALA 984 111.902 70.598 48.813 0.00 0.00  
ATOM 14839 CA ALA 984 110.045 70.388 49.720 0.00 0.00  
ATOM 14840 HA ALA 984 109.124 70.782 49.291 0.00 0.00  
ATOM 14841 CB ALA 984 110.133 68.951 49.234 0.00 0.00  
ATOM 14842 HB1 ALA 984 109.293 68.330 49.546 0.00 0.00

|      |       |     |     |     |         |        |        |      |      |
|------|-------|-----|-----|-----|---------|--------|--------|------|------|
| ATOM | 14843 | HB2 | ALA | 984 | 110.172 | 68.991 | 48.146 | 0.00 | 0.00 |
| ATOM | 14844 | HB3 | ALA | 984 | 111.078 | 68.515 | 49.559 | 0.00 | 0.00 |
| ATOM | 14845 | C   | ALA | 984 | 109.861 | 70.506 | 51.231 | 0.00 | 0.00 |
| ATOM | 14846 | O   | ALA | 984 | 108.704 | 70.363 | 51.641 | 0.00 | 0.00 |
| ATOM | 14847 | N   | ASP | 985 | 110.859 | 70.775 | 52.110 | 0.00 | 0.00 |
| ATOM | 14848 | H   | ASP | 985 | 111.810 | 70.703 | 51.779 | 0.00 | 0.00 |
| ATOM | 14849 | CA  | ASP | 985 | 110.646 | 71.132 | 53.478 | 0.00 | 0.00 |
| ATOM | 14850 | HA  | ASP | 985 | 110.058 | 70.429 | 54.068 | 0.00 | 0.00 |
| ATOM | 14851 | CB  | ASP | 985 | 111.978 | 71.069 | 54.193 | 0.00 | 0.00 |
| ATOM | 14852 | HB2 | ASP | 985 | 112.277 | 70.021 | 54.187 | 0.00 | 0.00 |
| ATOM | 14853 | HB3 | ASP | 985 | 112.561 | 71.770 | 53.596 | 0.00 | 0.00 |
| ATOM | 14854 | CG  | ASP | 985 | 112.106 | 71.553 | 55.663 | 0.00 | 0.00 |
| ATOM | 14855 | OD1 | ASP | 985 | 112.961 | 72.484 | 55.856 | 0.00 | 0.00 |
| ATOM | 14856 | OD2 | ASP | 985 | 111.331 | 71.175 | 56.610 | 0.00 | 0.00 |
| ATOM | 14857 | C   | ASP | 985 | 109.920 | 72.514 | 53.643 | 0.00 | 0.00 |
| ATOM | 14858 | O   | ASP | 985 | 109.436 | 72.778 | 54.726 | 0.00 | 0.00 |
| ATOM | 14859 | N   | MET | 986 | 110.007 | 73.334 | 52.574 | 0.00 | 0.00 |
| ATOM | 14860 | H   | MET | 986 | 110.642 | 73.057 | 51.839 | 0.00 | 0.00 |
| ATOM | 14861 | CA  | MET | 986 | 109.407 | 74.700 | 52.680 | 0.00 | 0.00 |
| ATOM | 14862 | HA  | MET | 986 | 109.162 | 74.974 | 53.706 | 0.00 | 0.00 |
| ATOM | 14863 | CB  | MET | 986 | 110.508 | 75.750 | 52.345 | 0.00 | 0.00 |
| ATOM | 14864 | HB2 | MET | 986 | 110.654 | 75.735 | 51.265 | 0.00 | 0.00 |
| ATOM | 14865 | HB3 | MET | 986 | 111.438 | 75.461 | 52.835 | 0.00 | 0.00 |
| ATOM | 14866 | CG  | MET | 986 | 110.077 | 77.153 | 52.811 | 0.00 | 0.00 |
| ATOM | 14867 | HG2 | MET | 986 | 109.322 | 77.510 | 52.110 | 0.00 | 0.00 |
| ATOM | 14868 | HG3 | MET | 986 | 109.519 | 77.245 | 53.743 | 0.00 | 0.00 |

|      |       |     |     |     |         |        |        |      |      |
|------|-------|-----|-----|-----|---------|--------|--------|------|------|
| ATOM | 14869 | SD  | MET | 986 | 111.402 | 78.348 | 52.951 | 0.00 | 0.00 |
| ATOM | 14870 | CE  | MET | 986 | 111.939 | 77.813 | 54.551 | 0.00 | 0.00 |
| ATOM | 14871 | HE1 | MET | 986 | 112.961 | 78.149 | 54.724 | 0.00 | 0.00 |
| ATOM | 14872 | HE2 | MET | 986 | 111.269 | 78.145 | 55.345 | 0.00 | 0.00 |
| ATOM | 14873 | HE3 | MET | 986 | 111.998 | 76.726 | 54.598 | 0.00 | 0.00 |
| ATOM | 14874 | C   | MET | 986 | 108.100 | 74.761 | 51.879 | 0.00 | 0.00 |
| ATOM | 14875 | O   | MET | 986 | 107.265 | 75.583 | 52.187 | 0.00 | 0.00 |
| ATOM | 14876 | N   | PHE | 987 | 107.937 | 73.869 | 50.898 | 0.00 | 0.00 |
| ATOM | 14877 | H   | PHE | 987 | 108.732 | 73.286 | 50.679 | 0.00 | 0.00 |
| ATOM | 14878 | CA  | PHE | 987 | 106.887 | 73.840 | 49.826 | 0.00 | 0.00 |
| ATOM | 14879 | HA  | PHE | 987 | 106.329 | 74.736 | 50.099 | 0.00 | 0.00 |
| ATOM | 14880 | CB  | PHE | 987 | 107.549 | 74.263 | 48.487 | 0.00 | 0.00 |
| ATOM | 14881 | HB2 | PHE | 987 | 108.368 | 73.578 | 48.266 | 0.00 | 0.00 |
| ATOM | 14882 | HB3 | PHE | 987 | 106.817 | 74.241 | 47.680 | 0.00 | 0.00 |
| ATOM | 14883 | CG  | PHE | 987 | 108.049 | 75.662 | 48.634 | 0.00 | 0.00 |
| ATOM | 14884 | CD1 | PHE | 987 | 109.442 | 75.882 | 48.550 | 0.00 | 0.00 |
| ATOM | 14885 | HD1 | PHE | 987 | 110.087 | 75.054 | 48.294 | 0.00 | 0.00 |
| ATOM | 14886 | CE1 | PHE | 987 | 109.988 | 77.158 | 48.644 | 0.00 | 0.00 |
| ATOM | 14887 | HE1 | PHE | 987 | 111.014 | 77.356 | 48.371 | 0.00 | 0.00 |
| ATOM | 14888 | CZ  | PHE | 987 | 109.143 | 78.206 | 49.014 | 0.00 | 0.00 |
| ATOM | 14889 | HZ  | PHE | 987 | 109.483 | 79.230 | 49.026 | 0.00 | 0.00 |
| ATOM | 14890 | CE2 | PHE | 987 | 107.714 | 77.983 | 49.053 | 0.00 | 0.00 |
| ATOM | 14891 | HE2 | PHE | 987 | 107.076 | 78.846 | 49.171 | 0.00 | 0.00 |
| ATOM | 14892 | CD2 | PHE | 987 | 107.200 | 76.758 | 48.849 | 0.00 | 0.00 |
| ATOM | 14893 | HD2 | PHE | 987 | 106.136 | 76.594 | 48.755 | 0.00 | 0.00 |
| ATOM | 14894 | C   | PHE | 987 | 105.995 | 72.608 | 49.785 | 0.00 | 0.00 |



|      |       |     |     |     |         |        |        |      |      |
|------|-------|-----|-----|-----|---------|--------|--------|------|------|
| ATOM | 14895 | O   | PHE | 987 | 105.032 | 72.640 | 49.096 | 0.00 | 0.00 |
| ATOM | 14896 | N   | GLY | 988 | 106.464 | 71.574 | 50.402 | 0.00 | 0.00 |
| ATOM | 14897 | H   | GLY | 988 | 107.275 | 71.712 | 50.987 | 0.00 | 0.00 |
| ATOM | 14898 | CA  | GLY | 988 | 105.916 | 70.235 | 50.260 | 0.00 | 0.00 |
| ATOM | 14899 | HA2 | GLY | 988 | 106.279 | 69.694 | 51.134 | 0.00 | 0.00 |
| ATOM | 14900 | HA3 | GLY | 988 | 104.835 | 70.095 | 50.257 | 0.00 | 0.00 |
| ATOM | 14901 | C   | GLY | 988 | 106.276 | 69.499 | 48.945 | 0.00 | 0.00 |
| ATOM | 14902 | O   | GLY | 988 | 106.804 | 70.124 | 47.988 | 0.00 | 0.00 |
| ATOM | 14903 | N   | PRO | 989 | 105.929 | 68.184 | 49.001 | 0.00 | 0.00 |
| ATOM | 14904 | CD  | PRO | 989 | 105.414 | 67.477 | 50.146 | 0.00 | 0.00 |
| ATOM | 14905 | HD2 | PRO | 989 | 106.076 | 67.446 | 51.011 | 0.00 | 0.00 |
| ATOM | 14906 | HD3 | PRO | 989 | 104.483 | 67.895 | 50.529 | 0.00 | 0.00 |
| ATOM | 14907 | CG  | PRO | 989 | 105.212 | 66.018 | 49.803 | 0.00 | 0.00 |
| ATOM | 14908 | HG2 | PRO | 989 | 106.078 | 65.470 | 50.175 | 0.00 | 0.00 |
| ATOM | 14909 | HG3 | PRO | 989 | 104.252 | 65.594 | 50.098 | 0.00 | 0.00 |
| ATOM | 14910 | CB  | PRO | 989 | 105.327 | 66.050 | 48.269 | 0.00 | 0.00 |
| ATOM | 14911 | HB2 | PRO | 989 | 105.706 | 65.083 | 47.941 | 0.00 | 0.00 |
| ATOM | 14912 | HB3 | PRO | 989 | 104.397 | 66.249 | 47.737 | 0.00 | 0.00 |
| ATOM | 14913 | CA  | PRO | 989 | 106.257 | 67.189 | 47.987 | 0.00 | 0.00 |
| ATOM | 14914 | HA  | PRO | 989 | 107.267 | 66.838 | 48.199 | 0.00 | 0.00 |
| ATOM | 14915 | C   | PRO | 989 | 106.160 | 67.741 | 46.525 | 0.00 | 0.00 |
| ATOM | 14916 | O   | PRO | 989 | 105.135 | 68.104 | 46.065 | 0.00 | 0.00 |
| ATOM | 14917 | N   | THR | 990 | 107.268 | 67.549 | 45.800 | 0.00 | 0.00 |
| ATOM | 14918 | H   | THR | 990 | 108.085 | 67.110 | 46.200 | 0.00 | 0.00 |
| ATOM | 14919 | CA  | THR | 990 | 107.185 | 67.526 | 44.359 | 0.00 | 0.00 |
| ATOM | 14920 | HA  | THR | 990 | 106.333 | 68.079 | 43.965 | 0.00 | 0.00 |

ATOM 14921 CB THR 990 108.413 68.193 43.739 0.00 0.00  
ATOM 14922 HB THR 990 108.239 68.209 42.663 0.00 0.00  
ATOM 14923 CG2 THR 990 108.563 69.659 44.060 0.00 0.00  
ATOM 14924 1HG2 THR 990 108.577 69.762 45.145 0.00 0.00  
ATOM 14925 2HG2 THR 990 109.461 70.127 43.657 0.00 0.00  
ATOM 14926 3HG2 THR 990 107.700 70.145 43.605 0.00 0.00  
ATOM 14927 OG1 THR 990 109.661 67.570 43.988 0.00 0.00  
ATOM 14928 HG1 THR 990 109.744 67.191 44.867 0.00 0.00  
ATOM 14929 C THR 990 106.971 66.154 43.697 0.00 0.00  
ATOM 14930 O THR 990 106.830 65.120 44.326 0.00 0.00  
ATOM 14931 N VAL 991 106.791 66.089 42.336 0.00 0.00  
ATOM 14932 H VAL 991 106.982 66.959 41.860 0.00 0.00  
ATOM 14933 CA VAL 991 106.414 64.840 41.621 0.00 0.00  
ATOM 14934 HA VAL 991 105.457 64.531 42.042 0.00 0.00  
ATOM 14935 CB VAL 991 106.167 65.047 40.112 0.00 0.00  
ATOM 14936 HB VAL 991 105.520 65.914 39.980 0.00 0.00  
ATOM 14937 CG1 VAL 991 107.406 65.419 39.326 0.00 0.00  
ATOM 14938 1HG1 VAL 991 108.088 64.573 39.238 0.00 0.00  
ATOM 14939 2HG1 VAL 991 107.178 65.918 38.384 0.00 0.00  
ATOM 14940 3HG1 VAL 991 107.894 66.224 39.876 0.00 0.00  
ATOM 14941 CG2 VAL 991 105.407 63.914 39.435 0.00 0.00  
ATOM 14942 1HG2 VAL 991 105.028 64.326 38.500 0.00 0.00  
ATOM 14943 2HG2 VAL 991 106.107 63.125 39.159 0.00 0.00  
ATOM 14944 3HG2 VAL 991 104.627 63.501 40.074 0.00 0.00  
ATOM 14945 C VAL 991 107.431 63.721 41.885 0.00 0.00  
ATOM 14946 O VAL 991 108.581 63.970 41.967 0.00 0.00

ATOM 14947 N GLY 992 106.957 62.568 42.167 0.00 0.00  
ATOM 14948 H GLY 992 105.976 62.429 41.972 0.00 0.00  
ATOM 14949 CA GLY 992 107.711 61.451 42.694 0.00 0.00  
ATOM 14950 HA2 GLY 992 107.163 60.510 42.648 0.00 0.00  
ATOM 14951 HA3 GLY 992 108.573 61.388 42.030 0.00 0.00  
ATOM 14952 C GLY 992 108.221 61.590 44.115 0.00 0.00  
ATOM 14953 O GLY 992 108.953 60.672 44.507 0.00 0.00  
ATOM 14954 N ASP 993 107.927 62.575 44.972 0.00 0.00  
ATOM 14955 H ASP 993 107.308 63.296 44.629 0.00 0.00  
ATOM 14956 CA ASP 993 107.920 62.491 46.460 0.00 0.00  
ATOM 14957 HA ASP 993 108.781 61.858 46.674 0.00 0.00  
ATOM 14958 CB ASP 993 108.226 63.928 46.934 0.00 0.00  
ATOM 14959 HB2 ASP 993 107.385 64.552 46.629 0.00 0.00  
ATOM 14960 HB3 ASP 993 108.314 63.928 48.020 0.00 0.00  
ATOM 14961 CG ASP 993 109.465 64.594 46.340 0.00 0.00  
ATOM 14962 OD1 ASP 993 110.551 64.005 46.187 0.00 0.00  
ATOM 14963 OD2 ASP 993 109.414 65.815 45.991 0.00 0.00  
ATOM 14964 C ASP 993 106.736 61.872 47.084 0.00 0.00  
ATOM 14965 O ASP 993 105.750 61.568 46.418 0.00 0.00  
ATOM 14966 N LYS 994 106.849 61.490 48.339 0.00 0.00  
ATOM 14967 H LYS 994 107.622 61.850 48.879 0.00 0.00  
ATOM 14968 CA LYS 994 105.901 60.496 48.928 0.00 0.00  
ATOM 14969 HA LYS 994 104.923 60.499 48.446 0.00 0.00  
ATOM 14970 CB LYS 994 106.513 59.131 48.735 0.00 0.00  
ATOM 14971 HB2 LYS 994 105.874 58.431 49.273 0.00 0.00  
ATOM 14972 HB3 LYS 994 106.514 58.944 47.661 0.00 0.00

ATOM 14973 CG LYS 994 107.932 58.915 49.298 0.00 0.00  
ATOM 14974 HG2 LYS 994 108.561 59.594 48.723 0.00 0.00  
ATOM 14975 HG3 LYS 994 107.858 59.115 50.367 0.00 0.00  
ATOM 14976 CD LYS 994 108.354 57.483 49.060 0.00 0.00  
ATOM 14977 HD2 LYS 994 107.765 56.775 49.642 0.00 0.00  
ATOM 14978 HD3 LYS 994 108.218 57.202 48.015 0.00 0.00  
ATOM 14979 CE LYS 994 109.798 57.266 49.344 0.00 0.00  
ATOM 14980 HE2 LYS 994 110.054 57.426 50.392 0.00 0.00  
ATOM 14981 HE3 LYS 994 110.087 56.244 49.100 0.00 0.00  
ATOM 14982 NZ LYS 994 110.642 58.100 48.416 0.00 0.00  
ATOM 14983 HZ1 LYS 994 110.093 58.419 47.630 0.00 0.00  
ATOM 14984 HZ2 LYS 994 111.240 58.826 48.785 0.00 0.00  
ATOM 14985 HZ3 LYS 994 111.246 57.482 47.894 0.00 0.00  
ATOM 14986 C LYS 994 105.675 60.811 50.434 0.00 0.00  
ATOM 14987 O LYS 994 106.416 61.460 51.117 0.00 0.00  
ATOM 14988 N VAL 995 104.579 60.207 50.970 0.00 0.00  
ATOM 14989 H VAL 995 104.096 59.577 50.346 0.00 0.00  
ATOM 14990 CA VAL 995 104.066 60.520 52.318 0.00 0.00  
ATOM 14991 HA VAL 995 104.855 60.860 52.990 0.00 0.00  
ATOM 14992 CB VAL 995 102.974 61.590 52.266 0.00 0.00  
ATOM 14993 HB VAL 995 102.071 61.081 51.929 0.00 0.00  
ATOM 14994 CG1 VAL 995 102.779 62.210 53.623 0.00 0.00  
ATOM 14995 1HG1 VAL 995 102.909 61.475 54.417 0.00 0.00  
ATOM 14996 2HG1 VAL 995 103.429 63.075 53.758 0.00 0.00  
ATOM 14997 3HG1 VAL 995 101.773 62.593 53.791 0.00 0.00  
ATOM 14998 CG2 VAL 995 103.187 62.744 51.316 0.00 0.00

ATOM 14999 1HG2 VAL 995 103.228 62.375 50.291 0.00 0.00  
ATOM 15000 2HG2 VAL 995 102.394 63.491 51.289 0.00 0.00  
ATOM 15001 3HG2 VAL 995 103.975 63.464 51.538 0.00 0.00  
ATOM 15002 C VAL 995 103.309 59.295 52.784 0.00 0.00  
ATOM 15003 O VAL 995 102.672 58.624 52.016 0.00 0.00  
ATOM 15004 N ARG 996 103.415 58.980 54.118 0.00 0.00  
ATOM 15005 H ARG 996 103.847 59.630 54.760 0.00 0.00  
ATOM 15006 CA ARG 996 102.939 57.733 54.713 0.00 0.00  
ATOM 15007 HA ARG 996 102.929 56.930 53.976 0.00 0.00  
ATOM 15008 CB ARG 996 103.818 57.425 55.897 0.00 0.00  
ATOM 15009 HB2 ARG 996 104.859 57.317 55.595 0.00 0.00  
ATOM 15010 HB3 ARG 996 103.664 58.169 56.679 0.00 0.00  
ATOM 15011 CG ARG 996 103.456 56.025 56.439 0.00 0.00  
ATOM 15012 HG2 ARG 996 102.451 56.127 56.847 0.00 0.00  
ATOM 15013 HG3 ARG 996 103.465 55.254 55.668 0.00 0.00  
ATOM 15014 CD ARG 996 104.434 55.704 57.518 0.00 0.00  
ATOM 15015 HD2 ARG 996 104.594 56.607 58.107 0.00 0.00  
ATOM 15016 HD3 ARG 996 105.339 55.373 57.008 0.00 0.00  
ATOM 15017 NE ARG 996 103.879 54.660 58.388 0.00 0.00  
ATOM 15018 HE ARG 996 103.037 54.197 58.076 0.00 0.00  
ATOM 15019 CZ ARG 996 104.312 54.310 59.580 0.00 0.00  
ATOM 15020 NH1 ARG 996 105.374 54.852 60.065 0.00 0.00  
ATOM 15021 1HH1 ARG 996 105.801 54.436 60.880 0.00 0.00  
ATOM 15022 2HH1 ARG 996 105.896 55.363 59.368 0.00 0.00  
ATOM 15023 NH2 ARG 996 103.753 53.476 60.358 0.00 0.00  
ATOM 15024 1HH2 ARG 996 103.951 53.431 61.347 0.00 0.00

ATOM 15025 2HH2 ARG 996 102.868 53.039 60.142 0.00 0.00  
ATOM 15026 C ARG 996 101.521 58.109 55.136 0.00 0.00  
ATOM 15027 O ARG 996 101.206 59.243 55.525 0.00 0.00  
ATOM 15028 N LEU 997 100.553 57.224 54.972 0.00 0.00  
ATOM 15029 H LEU 997 100.901 56.395 54.511 0.00 0.00  
ATOM 15030 CA LEU 997 99.255 57.334 55.509 0.00 0.00  
ATOM 15031 HA LEU 997 98.918 58.370 55.462 0.00 0.00  
ATOM 15032 CB LEU 997 98.191 56.623 54.545 0.00 0.00  
ATOM 15033 HB2 LEU 997 98.373 55.552 54.630 0.00 0.00  
ATOM 15034 HB3 LEU 997 97.231 56.935 54.956 0.00 0.00  
ATOM 15035 CG LEU 997 98.291 57.010 53.089 0.00 0.00  
ATOM 15036 HG LEU 997 99.321 56.913 52.745 0.00 0.00  
ATOM 15037 CD1 LEU 997 97.347 56.243 52.158 0.00 0.00  
ATOM 15038 1HD1 LEU 997 96.290 56.384 52.381 0.00 0.00  
ATOM 15039 2HD1 LEU 997 97.377 56.625 51.138 0.00 0.00  
ATOM 15040 3HD1 LEU 997 97.500 55.165 52.212 0.00 0.00  
ATOM 15041 CD2 LEU 997 98.111 58.546 53.016 0.00 0.00  
ATOM 15042 1HD2 LEU 997 98.936 59.059 53.509 0.00 0.00  
ATOM 15043 2HD2 LEU 997 97.964 58.900 51.996 0.00 0.00  
ATOM 15044 3HD2 LEU 997 97.151 58.798 53.466 0.00 0.00  
ATOM 15045 C LEU 997 99.074 56.898 56.964 0.00 0.00  
ATOM 15046 O LEU 997 98.742 55.771 57.281 0.00 0.00  
ATOM 15047 N ALA 998 99.172 57.878 57.816 0.00 0.00  
ATOM 15048 H ALA 998 99.638 58.733 57.548 0.00 0.00  
ATOM 15049 CA ALA 998 99.014 57.671 59.261 0.00 0.00  
ATOM 15050 HA ALA 998 99.284 58.541 59.858 0.00 0.00

|      |       |      |     |      |         |        |        |      |      |
|------|-------|------|-----|------|---------|--------|--------|------|------|
| ATOM | 15051 | CB   | ALA | 998  | 97.492  | 57.424 | 59.592 | 0.00 | 0.00 |
| ATOM | 15052 | HB1  | ALA | 998  | 97.412  | 56.919 | 60.555 | 0.00 | 0.00 |
| ATOM | 15053 | HB2  | ALA | 998  | 97.044  | 58.405 | 59.752 | 0.00 | 0.00 |
| ATOM | 15054 | HB3  | ALA | 998  | 96.976  | 56.956 | 58.753 | 0.00 | 0.00 |
| ATOM | 15055 | C    | ALA | 998  | 100.095 | 56.770 | 59.783 | 0.00 | 0.00 |
| ATOM | 15056 | O    | ALA | 998  | 101.310 | 56.839 | 59.379 | 0.00 | 0.00 |
| ATOM | 15057 | N    | ASP | 999  | 99.770  | 55.978 | 60.768 | 0.00 | 0.00 |
| ATOM | 15058 | H    | ASP | 999  | 98.790  | 55.870 | 60.987 | 0.00 | 0.00 |
| ATOM | 15059 | CA   | ASP | 999  | 100.479 | 54.908 | 61.377 | 0.00 | 0.00 |
| ATOM | 15060 | HA   | ASP | 999  | 101.541 | 55.148 | 61.420 | 0.00 | 0.00 |
| ATOM | 15061 | CB   | ASP | 999  | 99.986  | 54.765 | 62.815 | 0.00 | 0.00 |
| ATOM | 15062 | HB2  | ASP | 999  | 99.999  | 55.734 | 63.316 | 0.00 | 0.00 |
| ATOM | 15063 | HB3  | ASP | 999  | 98.971  | 54.397 | 62.665 | 0.00 | 0.00 |
| ATOM | 15064 | CG   | ASP | 999  | 100.584 | 53.722 | 63.757 | 0.00 | 0.00 |
| ATOM | 15065 | OD1  | ASP | 999  | 99.817  | 52.870 | 64.262 | 0.00 | 0.00 |
| ATOM | 15066 | OD2  | ASP | 999  | 101.782 | 53.895 | 64.170 | 0.00 | 0.00 |
| ATOM | 15067 | C    | ASP | 999  | 100.329 | 53.545 | 60.635 | 0.00 | 0.00 |
| ATOM | 15068 | O    | ASP | 999  | 100.816 | 52.539 | 61.037 | 0.00 | 0.00 |
| ATOM | 15069 | N    | THR | 1000 | 99.678  | 53.512 | 59.475 | 0.00 | 0.00 |
| ATOM | 15070 | H    | THR | 1000 | 99.406  | 54.392 | 59.059 | 0.00 | 0.00 |
| ATOM | 15071 | CA   | THR | 1000 | 99.620  | 52.289 | 58.562 | 0.00 | 0.00 |
| ATOM | 15072 | HA   | THR | 1000 | 99.562  | 51.379 | 59.159 | 0.00 | 0.00 |
| ATOM | 15073 | CB   | THR | 1000 | 98.520  | 52.410 | 57.494 | 0.00 | 0.00 |
| ATOM | 15074 | HB   | THR | 1000 | 98.302  | 51.454 | 57.018 | 0.00 | 0.00 |
| ATOM | 15075 | CG2  | THR | 1000 | 97.196  | 52.723 | 58.120 | 0.00 | 0.00 |
| ATOM | 15076 | 1HG2 | THR | 1000 | 97.264  | 53.250 | 59.071 | 0.00 | 0.00 |

|      |       |      |     |      |         |        |        |      |      |
|------|-------|------|-----|------|---------|--------|--------|------|------|
| ATOM | 15077 | 2HG2 | THR | 1000 | 96.699  | 53.423 | 57.448 | 0.00 | 0.00 |
| ATOM | 15078 | 3HG2 | THR | 1000 | 96.648  | 51.790 | 58.252 | 0.00 | 0.00 |
| ATOM | 15079 | OG1  | THR | 1000 | 98.936  | 53.386 | 56.523 | 0.00 | 0.00 |
| ATOM | 15080 | HG1  | THR | 1000 | 98.697  | 54.222 | 56.930 | 0.00 | 0.00 |
| ATOM | 15081 | C    | THR | 1000 | 100.954 | 52.019 | 57.810 | 0.00 | 0.00 |
| ATOM | 15082 | O    | THR | 1000 | 101.865 | 52.864 | 57.891 | 0.00 | 0.00 |
| ATOM | 15083 | N    | GLU | 1001 | 101.159 | 50.797 | 57.332 | 0.00 | 0.00 |
| ATOM | 15084 | H    | GLU | 1001 | 100.496 | 50.055 | 57.504 | 0.00 | 0.00 |
| ATOM | 15085 | CA   | GLU | 1001 | 102.254 | 50.546 | 56.381 | 0.00 | 0.00 |
| ATOM | 15086 | HA   | GLU | 1001 | 103.102 | 51.161 | 56.682 | 0.00 | 0.00 |
| ATOM | 15087 | CB   | GLU | 1001 | 102.565 | 49.005 | 56.470 | 0.00 | 0.00 |
| ATOM | 15088 | HB2  | GLU | 1001 | 101.649 | 48.478 | 56.200 | 0.00 | 0.00 |
| ATOM | 15089 | HB3  | GLU | 1001 | 103.372 | 48.780 | 55.773 | 0.00 | 0.00 |
| ATOM | 15090 | CG   | GLU | 1001 | 103.129 | 48.527 | 57.832 | 0.00 | 0.00 |
| ATOM | 15091 | HG2  | GLU | 1001 | 102.508 | 48.902 | 58.646 | 0.00 | 0.00 |
| ATOM | 15092 | HG3  | GLU | 1001 | 103.040 | 47.440 | 57.844 | 0.00 | 0.00 |
| ATOM | 15093 | CD   | GLU | 1001 | 104.574 | 48.892 | 58.045 | 0.00 | 0.00 |
| ATOM | 15094 | OE1  | GLU | 1001 | 104.774 | 50.070 | 58.315 | 0.00 | 0.00 |
| ATOM | 15095 | OE2  | GLU | 1001 | 105.493 | 47.994 | 58.022 | 0.00 | 0.00 |
| ATOM | 15096 | C    | GLU | 1001 | 102.056 | 50.965 | 54.899 | 0.00 | 0.00 |
| ATOM | 15097 | O    | GLU | 1001 | 102.813 | 50.603 | 54.004 | 0.00 | 0.00 |
| ATOM | 15098 | N    | LEU | 1002 | 101.123 | 51.902 | 54.688 | 0.00 | 0.00 |
| ATOM | 15099 | H    | LEU | 1002 | 100.611 | 52.386 | 55.411 | 0.00 | 0.00 |
| ATOM | 15100 | CA   | LEU | 1002 | 100.899 | 52.457 | 53.356 | 0.00 | 0.00 |
| ATOM | 15101 | HA   | LEU | 1002 | 101.181 | 51.769 | 52.559 | 0.00 | 0.00 |
| ATOM | 15102 | CB   | LEU | 1002 | 99.400  | 52.722 | 53.148 | 0.00 | 0.00 |



|      |       |      |     |      |         |        |        |      |      |
|------|-------|------|-----|------|---------|--------|--------|------|------|
| ATOM | 15103 | HB2  | LEU | 1002 | 99.208  | 53.496 | 53.892 | 0.00 | 0.00 |
| ATOM | 15104 | HB3  | LEU | 1002 | 99.400  | 53.187 | 52.162 | 0.00 | 0.00 |
| ATOM | 15105 | CG   | LEU | 1002 | 98.271  | 51.625 | 53.398 | 0.00 | 0.00 |
| ATOM | 15106 | HG   | LEU | 1002 | 98.377  | 51.157 | 54.377 | 0.00 | 0.00 |
| ATOM | 15107 | CD1  | LEU | 1002 | 96.899  | 52.242 | 53.514 | 0.00 | 0.00 |
| ATOM | 15108 | 1HD1 | LEU | 1002 | 96.137  | 51.464 | 53.478 | 0.00 | 0.00 |
| ATOM | 15109 | 2HD1 | LEU | 1002 | 96.903  | 52.699 | 54.504 | 0.00 | 0.00 |
| ATOM | 15110 | 3HD1 | LEU | 1002 | 96.654  | 52.945 | 52.718 | 0.00 | 0.00 |
| ATOM | 15111 | CD2  | LEU | 1002 | 98.483  | 50.431 | 52.386 | 0.00 | 0.00 |
| ATOM | 15112 | 1HD2 | LEU | 1002 | 97.868  | 49.561 | 52.618 | 0.00 | 0.00 |
| ATOM | 15113 | 2HD2 | LEU | 1002 | 98.313  | 50.988 | 51.465 | 0.00 | 0.00 |
| ATOM | 15114 | 3HD2 | LEU | 1002 | 99.506  | 50.056 | 52.401 | 0.00 | 0.00 |
| ATOM | 15115 | C    | LEU | 1002 | 101.607 | 53.856 | 53.118 | 0.00 | 0.00 |
| ATOM | 15116 | O    | LEU | 1002 | 101.661 | 54.689 | 53.989 | 0.00 | 0.00 |
| ATOM | 15117 | N    | TRP | 1003 | 102.049 | 53.983 | 51.843 | 0.00 | 0.00 |
| ATOM | 15118 | H    | TRP | 1003 | 101.924 | 53.260 | 51.149 | 0.00 | 0.00 |
| ATOM | 15119 | CA   | TRP | 1003 | 102.687 | 55.184 | 51.317 | 0.00 | 0.00 |
| ATOM | 15120 | HA   | TRP | 1003 | 102.481 | 56.016 | 51.990 | 0.00 | 0.00 |
| ATOM | 15121 | CB   | TRP | 1003 | 104.210 | 54.874 | 51.268 | 0.00 | 0.00 |
| ATOM | 15122 | HB2  | TRP | 1003 | 104.352 | 53.875 | 50.856 | 0.00 | 0.00 |
| ATOM | 15123 | HB3  | TRP | 1003 | 104.595 | 55.629 | 50.582 | 0.00 | 0.00 |
| ATOM | 15124 | CG   | TRP | 1003 | 105.045 | 54.757 | 52.449 | 0.00 | 0.00 |
| ATOM | 15125 | CD1  | TRP | 1003 | 105.280 | 53.672 | 53.254 | 0.00 | 0.00 |
| ATOM | 15126 | HD1  | TRP | 1003 | 104.731 | 52.761 | 53.066 | 0.00 | 0.00 |
| ATOM | 15127 | NE1  | TRP | 1003 | 106.287 | 53.952 | 54.206 | 0.00 | 0.00 |
| ATOM | 15128 | HE1  | TRP | 1003 | 106.576 | 53.264 | 54.887 | 0.00 | 0.00 |

|      |       |      |     |      |         |        |        |      |      |
|------|-------|------|-----|------|---------|--------|--------|------|------|
| ATOM | 15129 | CE2  | TRP | 1003 | 106.618 | 55.306 | 54.138 | 0.00 | 0.00 |
| ATOM | 15130 | CZ2  | TRP | 1003 | 107.469 | 56.175 | 54.859 | 0.00 | 0.00 |
| ATOM | 15131 | HZ2  | TRP | 1003 | 108.026 | 55.819 | 55.713 | 0.00 | 0.00 |
| ATOM | 15132 | CH2  | TRP | 1003 | 107.698 | 57.486 | 54.394 | 0.00 | 0.00 |
| ATOM | 15133 | HH2  | TRP | 1003 | 108.337 | 58.188 | 54.909 | 0.00 | 0.00 |
| ATOM | 15134 | CZ3  | TRP | 1003 | 106.976 | 57.981 | 53.309 | 0.00 | 0.00 |
| ATOM | 15135 | HZ3  | TRP | 1003 | 107.164 | 58.954 | 52.881 | 0.00 | 0.00 |
| ATOM | 15136 | CE3  | TRP | 1003 | 106.100 | 57.130 | 52.596 | 0.00 | 0.00 |
| ATOM | 15137 | HE3  | TRP | 1003 | 105.574 | 57.508 | 51.731 | 0.00 | 0.00 |
| ATOM | 15138 | CD2  | TRP | 1003 | 105.834 | 55.793 | 53.003 | 0.00 | 0.00 |
| ATOM | 15139 | C    | TRP | 1003 | 102.247 | 55.511 | 49.870 | 0.00 | 0.00 |
| ATOM | 15140 | O    | TRP | 1003 | 102.358 | 54.621 | 49.003 | 0.00 | 0.00 |
| ATOM | 15141 | N    | ILE | 1004 | 101.818 | 56.721 | 49.658 | 0.00 | 0.00 |
| ATOM | 15142 | H    | ILE | 1004 | 101.789 | 57.382 | 50.421 | 0.00 | 0.00 |
| ATOM | 15143 | CA   | ILE | 1004 | 101.491 | 57.249 | 48.409 | 0.00 | 0.00 |
| ATOM | 15144 | HA   | ILE | 1004 | 101.214 | 56.360 | 47.842 | 0.00 | 0.00 |
| ATOM | 15145 | CB   | ILE | 1004 | 100.302 | 58.297 | 48.489 | 0.00 | 0.00 |
| ATOM | 15146 | HB   | ILE | 1004 | 100.348 | 58.837 | 47.543 | 0.00 | 0.00 |
| ATOM | 15147 | CG2  | ILE | 1004 | 98.990  | 57.539 | 48.579 | 0.00 | 0.00 |
| ATOM | 15148 | 1HG2 | ILE | 1004 | 98.085  | 58.103 | 48.351 | 0.00 | 0.00 |
| ATOM | 15149 | 2HG2 | ILE | 1004 | 98.934  | 56.791 | 47.788 | 0.00 | 0.00 |
| ATOM | 15150 | 3HG2 | ILE | 1004 | 98.828  | 57.016 | 49.521 | 0.00 | 0.00 |
| ATOM | 15151 | CG1  | ILE | 1004 | 100.494 | 59.398 | 49.611 | 0.00 | 0.00 |
| ATOM | 15152 | 2HG1 | ILE | 1004 | 100.533 | 58.893 | 50.576 | 0.00 | 0.00 |
| ATOM | 15153 | 3HG1 | ILE | 1004 | 101.468 | 59.856 | 49.435 | 0.00 | 0.00 |
| ATOM | 15154 | CD1  | ILE | 1004 | 99.449  | 60.509 | 49.639 | 0.00 | 0.00 |

|      |       |      |     |      |         |        |        |      |      |
|------|-------|------|-----|------|---------|--------|--------|------|------|
| ATOM | 15155 | 1HD1 | ILE | 1004 | 99.566  | 61.149 | 48.764 | 0.00 | 0.00 |
| ATOM | 15156 | 2HD1 | ILE | 1004 | 98.444  | 60.108 | 49.503 | 0.00 | 0.00 |
| ATOM | 15157 | 3HD1 | ILE | 1004 | 99.335  | 61.117 | 50.537 | 0.00 | 0.00 |
| ATOM | 15158 | C    | ILE | 1004 | 102.746 | 57.907 | 47.834 | 0.00 | 0.00 |
| ATOM | 15159 | O    | ILE | 1004 | 103.617 | 58.448 | 48.489 | 0.00 | 0.00 |
| ATOM | 15160 | N    | GLU | 1005 | 102.629 | 58.098 | 46.523 | 0.00 | 0.00 |
| ATOM | 15161 | H    | GLU | 1005 | 101.876 | 57.692 | 45.986 | 0.00 | 0.00 |
| ATOM | 15162 | CA   | GLU | 1005 | 103.533 | 58.850 | 45.848 | 0.00 | 0.00 |
| ATOM | 15163 | HA   | GLU | 1005 | 104.181 | 59.412 | 46.520 | 0.00 | 0.00 |
| ATOM | 15164 | CB   | GLU | 1005 | 104.494 | 57.961 | 45.032 | 0.00 | 0.00 |
| ATOM | 15165 | HB2  | GLU | 1005 | 104.946 | 57.258 | 45.731 | 0.00 | 0.00 |
| ATOM | 15166 | HB3  | GLU | 1005 | 103.868 | 57.466 | 44.290 | 0.00 | 0.00 |
| ATOM | 15167 | CG   | GLU | 1005 | 105.601 | 58.706 | 44.301 | 0.00 | 0.00 |
| ATOM | 15168 | HG2  | GLU | 1005 | 105.133 | 59.376 | 43.579 | 0.00 | 0.00 |
| ATOM | 15169 | HG3  | GLU | 1005 | 106.107 | 59.320 | 45.046 | 0.00 | 0.00 |
| ATOM | 15170 | CD   | GLU | 1005 | 106.587 | 57.708 | 43.658 | 0.00 | 0.00 |
| ATOM | 15171 | OE1  | GLU | 1005 | 106.615 | 57.689 | 42.367 | 0.00 | 0.00 |
| ATOM | 15172 | OE2  | GLU | 1005 | 107.452 | 57.054 | 44.338 | 0.00 | 0.00 |
| ATOM | 15173 | C    | GLU | 1005 | 102.828 | 59.893 | 44.903 | 0.00 | 0.00 |
| ATOM | 15174 | O    | GLU | 1005 | 101.768 | 59.549 | 44.321 | 0.00 | 0.00 |
| ATOM | 15175 | N    | VAL | 1006 | 103.348 | 61.158 | 44.755 | 0.00 | 0.00 |
| ATOM | 15176 | H    | VAL | 1006 | 104.206 | 61.368 | 45.244 | 0.00 | 0.00 |
| ATOM | 15177 | CA   | VAL | 1006 | 102.729 | 62.173 | 43.995 | 0.00 | 0.00 |
| ATOM | 15178 | HA   | VAL | 1006 | 101.664 | 62.041 | 44.185 | 0.00 | 0.00 |
| ATOM | 15179 | CB   | VAL | 1006 | 103.124 | 63.563 | 44.516 | 0.00 | 0.00 |
| ATOM | 15180 | HB   | VAL | 1006 | 104.178 | 63.613 | 44.789 | 0.00 | 0.00 |

|      |       |      |     |      |         |        |        |      |      |
|------|-------|------|-----|------|---------|--------|--------|------|------|
| ATOM | 15181 | CG1  | VAL | 1006 | 102.789 | 64.679 | 43.465 | 0.00 | 0.00 |
| ATOM | 15182 | 1HG1 | VAL | 1006 | 101.704 | 64.743 | 43.384 | 0.00 | 0.00 |
| ATOM | 15183 | 2HG1 | VAL | 1006 | 103.045 | 65.614 | 43.964 | 0.00 | 0.00 |
| ATOM | 15184 | 3HG1 | VAL | 1006 | 103.276 | 64.504 | 42.506 | 0.00 | 0.00 |
| ATOM | 15185 | CG2  | VAL | 1006 | 102.351 | 63.800 | 45.843 | 0.00 | 0.00 |
| ATOM | 15186 | 1HG2 | VAL | 1006 | 101.267 | 63.748 | 45.734 | 0.00 | 0.00 |
| ATOM | 15187 | 2HG2 | VAL | 1006 | 102.597 | 63.051 | 46.596 | 0.00 | 0.00 |
| ATOM | 15188 | 3HG2 | VAL | 1006 | 102.737 | 64.721 | 46.280 | 0.00 | 0.00 |
| ATOM | 15189 | C    | VAL | 1006 | 102.921 | 61.899 | 42.498 | 0.00 | 0.00 |
| ATOM | 15190 | O    | VAL | 1006 | 104.110 | 61.815 | 42.035 | 0.00 | 0.00 |
| ATOM | 15191 | N    | GLU | 1007 | 101.934 | 61.853 | 41.713 | 0.00 | 0.00 |
| ATOM | 15192 | H    | GLU | 1007 | 100.980 | 61.884 | 42.044 | 0.00 | 0.00 |
| ATOM | 15193 | CA   | GLU | 1007 | 101.955 | 61.525 | 40.263 | 0.00 | 0.00 |
| ATOM | 15194 | HA   | GLU | 1007 | 102.963 | 61.244 | 39.959 | 0.00 | 0.00 |
| ATOM | 15195 | CB   | GLU | 1007 | 101.030 | 60.280 | 39.998 | 0.00 | 0.00 |
| ATOM | 15196 | HB2  | GLU | 1007 | 101.328 | 59.847 | 39.043 | 0.00 | 0.00 |
| ATOM | 15197 | HB3  | GLU | 1007 | 101.173 | 59.597 | 40.835 | 0.00 | 0.00 |
| ATOM | 15198 | CG   | GLU | 1007 | 99.486  | 60.574 | 40.040 | 0.00 | 0.00 |
| ATOM | 15199 | HG2  | GLU | 1007 | 99.244  | 61.132 | 40.944 | 0.00 | 0.00 |
| ATOM | 15200 | HG3  | GLU | 1007 | 99.147  | 61.244 | 39.249 | 0.00 | 0.00 |
| ATOM | 15201 | CD   | GLU | 1007 | 98.681  | 59.208 | 39.901 | 0.00 | 0.00 |
| ATOM | 15202 | OE1  | GLU | 1007 | 99.202  | 58.364 | 39.075 | 0.00 | 0.00 |
| ATOM | 15203 | OE2  | GLU | 1007 | 97.620  | 59.052 | 40.498 | 0.00 | 0.00 |
| ATOM | 15204 | C    | GLU | 1007 | 101.675 | 62.650 | 39.353 | 0.00 | 0.00 |
| ATOM | 15205 | O    | GLU | 1007 | 101.846 | 62.442 | 38.132 | 0.00 | 0.00 |
| ATOM | 15206 | N    | ASP | 1008 | 101.271 | 63.901 | 39.795 | 0.00 | 0.00 |

|      |       |     |     |      |         |        |        |      |      |
|------|-------|-----|-----|------|---------|--------|--------|------|------|
| ATOM | 15207 | H   | ASP | 1008 | 101.504 | 63.960 | 40.776 | 0.00 | 0.00 |
| ATOM | 15208 | CA  | ASP | 1008 | 101.364 | 65.185 | 39.018 | 0.00 | 0.00 |
| ATOM | 15209 | HA  | ASP | 1008 | 102.277 | 65.307 | 38.434 | 0.00 | 0.00 |
| ATOM | 15210 | CB  | ASP | 1008 | 100.160 | 65.259 | 38.046 | 0.00 | 0.00 |
| ATOM | 15211 | HB2 | ASP | 1008 | 99.242  | 65.411 | 38.613 | 0.00 | 0.00 |
| ATOM | 15212 | HB3 | ASP | 1008 | 100.044 | 64.375 | 37.419 | 0.00 | 0.00 |
| ATOM | 15213 | CG  | ASP | 1008 | 100.188 | 66.389 | 37.059 | 0.00 | 0.00 |
| ATOM | 15214 | OD1 | ASP | 1008 | 99.496  | 67.379 | 37.265 | 0.00 | 0.00 |
| ATOM | 15215 | OD2 | ASP | 1008 | 101.066 | 66.412 | 36.198 | 0.00 | 0.00 |
| ATOM | 15216 | C   | ASP | 1008 | 101.437 | 66.348 | 39.986 | 0.00 | 0.00 |
| ATOM | 15217 | O   | ASP | 1008 | 101.163 | 66.265 | 41.181 | 0.00 | 0.00 |
| ATOM | 15218 | N   | ASP | 1009 | 101.732 | 67.520 | 39.494 | 0.00 | 0.00 |
| ATOM | 15219 | H   | ASP | 1009 | 101.492 | 67.690 | 38.527 | 0.00 | 0.00 |
| ATOM | 15220 | CA  | ASP | 1009 | 102.243 | 68.663 | 40.202 | 0.00 | 0.00 |
| ATOM | 15221 | HA  | ASP | 1009 | 101.661 | 68.704 | 41.122 | 0.00 | 0.00 |
| ATOM | 15222 | CB  | ASP | 1009 | 103.704 | 68.353 | 40.543 | 0.00 | 0.00 |
| ATOM | 15223 | HB2 | ASP | 1009 | 103.705 | 67.350 | 40.971 | 0.00 | 0.00 |
| ATOM | 15224 | HB3 | ASP | 1009 | 104.205 | 68.373 | 39.575 | 0.00 | 0.00 |
| ATOM | 15225 | CG  | ASP | 1009 | 104.330 | 69.263 | 41.527 | 0.00 | 0.00 |
| ATOM | 15226 | OD1 | ASP | 1009 | 103.797 | 70.297 | 41.964 | 0.00 | 0.00 |
| ATOM | 15227 | OD2 | ASP | 1009 | 105.511 | 69.105 | 41.736 | 0.00 | 0.00 |
| ATOM | 15228 | C   | ASP | 1009 | 102.143 | 69.898 | 39.281 | 0.00 | 0.00 |
| ATOM | 15229 | O   | ASP | 1009 | 102.466 | 69.778 | 38.087 | 0.00 | 0.00 |
| ATOM | 15230 | N   | LEU | 1010 | 101.798 | 71.063 | 39.863 | 0.00 | 0.00 |
| ATOM | 15231 | H   | LEU | 1010 | 101.396 | 71.083 | 40.789 | 0.00 | 0.00 |
| ATOM | 15232 | CA  | LEU | 1010 | 101.795 | 72.434 | 39.119 | 0.00 | 0.00 |

|      |       |      |     |      |         |        |        |      |      |
|------|-------|------|-----|------|---------|--------|--------|------|------|
| ATOM | 15233 | HA   | LEU | 1010 | 101.872 | 72.282 | 38.042 | 0.00 | 0.00 |
| ATOM | 15234 | CB   | LEU | 1010 | 100.509 | 73.127 | 39.346 | 0.00 | 0.00 |
| ATOM | 15235 | HB2  | LEU | 1010 | 100.207 | 72.875 | 40.363 | 0.00 | 0.00 |
| ATOM | 15236 | HB3  | LEU | 1010 | 100.617 | 74.209 | 39.420 | 0.00 | 0.00 |
| ATOM | 15237 | CG   | LEU | 1010 | 99.387  | 72.909 | 38.310 | 0.00 | 0.00 |
| ATOM | 15238 | HG   | LEU | 1010 | 98.515  | 73.492 | 38.606 | 0.00 | 0.00 |
| ATOM | 15239 | CD1  | LEU | 1010 | 99.857  | 73.246 | 36.857 | 0.00 | 0.00 |
| ATOM | 15240 | 1HD1 | LEU | 1010 | 99.035  | 73.280 | 36.142 | 0.00 | 0.00 |
| ATOM | 15241 | 2HD1 | LEU | 1010 | 100.296 | 74.243 | 36.867 | 0.00 | 0.00 |
| ATOM | 15242 | 3HD1 | LEU | 1010 | 100.453 | 72.392 | 36.536 | 0.00 | 0.00 |
| ATOM | 15243 | CD2  | LEU | 1010 | 98.750  | 71.480 | 38.394 | 0.00 | 0.00 |
| ATOM | 15244 | 1HD2 | LEU | 1010 | 99.532  | 70.744 | 38.207 | 0.00 | 0.00 |
| ATOM | 15245 | 2HD2 | LEU | 1010 | 98.330  | 71.321 | 39.387 | 0.00 | 0.00 |
| ATOM | 15246 | 3HD2 | LEU | 1010 | 98.013  | 71.484 | 37.591 | 0.00 | 0.00 |
| ATOM | 15247 | C    | LEU | 1010 | 102.956 | 73.345 | 39.445 | 0.00 | 0.00 |
| ATOM | 15248 | O    | LEU | 1010 | 102.938 | 74.445 | 38.905 | 0.00 | 0.00 |
| ATOM | 15249 | N    | THR | 1011 | 103.986 | 72.883 | 40.176 | 0.00 | 0.00 |
| ATOM | 15250 | H    | THR | 1011 | 103.865 | 71.989 | 40.631 | 0.00 | 0.00 |
| ATOM | 15251 | CA   | THR | 1011 | 105.174 | 73.742 | 40.458 | 0.00 | 0.00 |
| ATOM | 15252 | HA   | THR | 1011 | 104.852 | 74.582 | 41.073 | 0.00 | 0.00 |
| ATOM | 15253 | CB   | THR | 1011 | 106.186 | 73.037 | 41.419 | 0.00 | 0.00 |
| ATOM | 15254 | HB   | THR | 1011 | 107.068 | 73.676 | 41.386 | 0.00 | 0.00 |
| ATOM | 15255 | CG2  | THR | 1011 | 105.696 | 73.023 | 42.859 | 0.00 | 0.00 |
| ATOM | 15256 | 1HG2 | THR | 1011 | 105.632 | 74.054 | 43.209 | 0.00 | 0.00 |
| ATOM | 15257 | 2HG2 | THR | 1011 | 104.704 | 72.587 | 42.981 | 0.00 | 0.00 |
| ATOM | 15258 | 3HG2 | THR | 1011 | 106.499 | 72.602 | 43.464 | 0.00 | 0.00 |

ATOM 15259 OG1 THR 1011 106.585 71.797 41.026 0.00 0.00  
ATOM 15260 HG1 THR 1011 106.306 71.093 41.616 0.00 0.00  
ATOM 15261 C THR 1011 105.876 74.368 39.199 0.00 0.00  
ATOM 15262 O THR 1011 106.055 73.650 38.277 0.00 0.00  
ATOM 15263 N THR 1012 106.269 75.670 39.216 0.00 0.00  
ATOM 15264 H THR 1012 105.953 76.247 39.982 0.00 0.00  
ATOM 15265 CA THR 1012 107.054 76.469 38.210 0.00 0.00  
ATOM 15266 HA THR 1012 107.123 75.760 37.385 0.00 0.00  
ATOM 15267 CB THR 1012 106.332 77.704 37.644 0.00 0.00  
ATOM 15268 HB THR 1012 107.019 78.271 37.017 0.00 0.00  
ATOM 15269 CG2 THR 1012 105.236 77.279 36.794 0.00 0.00  
ATOM 15270 1HG2 THR 1012 105.478 76.626 35.956 0.00 0.00  
ATOM 15271 2HG2 THR 1012 104.387 76.963 37.399 0.00 0.00  
ATOM 15272 3HG2 THR 1012 104.826 78.115 36.229 0.00 0.00  
ATOM 15273 OG1 THR 1012 105.912 78.564 38.753 0.00 0.00  
ATOM 15274 HG1 THR 1012 105.240 79.138 38.378 0.00 0.00  
ATOM 15275 C THR 1012 108.423 76.968 38.787 0.00 0.00  
ATOM 15276 O THR 1012 109.162 77.608 38.108 0.00 0.00  
ATOM 15277 N TYR 1013 108.701 76.668 40.082 0.00 0.00  
ATOM 15278 H TYR 1013 107.942 76.341 40.662 0.00 0.00  
ATOM 15279 CA TYR 1013 109.944 76.949 40.783 0.00 0.00  
ATOM 15280 HA TYR 1013 109.813 76.573 41.798 0.00 0.00  
ATOM 15281 CB TYR 1013 111.164 76.112 40.283 0.00 0.00  
ATOM 15282 HB2 TYR 1013 111.661 76.647 39.474 0.00 0.00  
ATOM 15283 HB3 TYR 1013 111.786 76.026 41.174 0.00 0.00  
ATOM 15284 CG TYR 1013 110.809 74.723 39.862 0.00 0.00

|      |       |     |     |      |         |        |        |      |      |
|------|-------|-----|-----|------|---------|--------|--------|------|------|
| ATOM | 15285 | CD1 | TYR | 1013 | 110.327 | 73.739 | 40.698 | 0.00 | 0.00 |
| ATOM | 15286 | HD1 | TYR | 1013 | 110.321 | 73.908 | 41.765 | 0.00 | 0.00 |
| ATOM | 15287 | CE1 | TYR | 1013 | 110.000 | 72.501 | 40.149 | 0.00 | 0.00 |
| ATOM | 15288 | HE1 | TYR | 1013 | 109.638 | 71.706 | 40.784 | 0.00 | 0.00 |
| ATOM | 15289 | CZ  | TYR | 1013 | 110.130 | 72.266 | 38.740 | 0.00 | 0.00 |
| ATOM | 15290 | OH  | TYR | 1013 | 109.831 | 71.009 | 38.275 | 0.00 | 0.00 |
| ATOM | 15291 | HH  | TYR | 1013 | 109.659 | 70.460 | 39.044 | 0.00 | 0.00 |
| ATOM | 15292 | CE2 | TYR | 1013 | 110.640 | 73.312 | 37.942 | 0.00 | 0.00 |
| ATOM | 15293 | HE2 | TYR | 1013 | 110.762 | 73.215 | 36.873 | 0.00 | 0.00 |
| ATOM | 15294 | CD2 | TYR | 1013 | 110.977 | 74.547 | 38.503 | 0.00 | 0.00 |
| ATOM | 15295 | HD2 | TYR | 1013 | 111.382 | 75.334 | 37.884 | 0.00 | 0.00 |
| ATOM | 15296 | C   | TYR | 1013 | 110.261 | 78.480 | 40.809 | 0.00 | 0.00 |
| ATOM | 15297 | O   | TYR | 1013 | 110.764 | 79.100 | 39.875 | 0.00 | 0.00 |
| ATOM | 15298 | N   | GLY | 1014 | 109.974 | 79.029 | 41.982 | 0.00 | 0.00 |
| ATOM | 15299 | H   | GLY | 1014 | 109.455 | 78.472 | 42.646 | 0.00 | 0.00 |
| ATOM | 15300 | CA  | GLY | 1014 | 110.300 | 80.381 | 42.472 | 0.00 | 0.00 |
| ATOM | 15301 | HA2 | GLY | 1014 | 110.834 | 80.389 | 43.422 | 0.00 | 0.00 |
| ATOM | 15302 | HA3 | GLY | 1014 | 110.906 | 80.884 | 41.718 | 0.00 | 0.00 |
| ATOM | 15303 | C   | GLY | 1014 | 109.032 | 81.334 | 42.559 | 0.00 | 0.00 |
| ATOM | 15304 | O   | GLY | 1014 | 109.254 | 82.535 | 42.881 | 0.00 | 0.00 |
| ATOM | 15305 | N   | GLU | 1015 | 107.831 | 80.800 | 42.286 | 0.00 | 0.00 |
| ATOM | 15306 | H   | GLU | 1015 | 107.774 | 79.800 | 42.156 | 0.00 | 0.00 |
| ATOM | 15307 | CA  | GLU | 1015 | 106.473 | 81.517 | 42.247 | 0.00 | 0.00 |
| ATOM | 15308 | HA  | GLU | 1015 | 106.599 | 82.520 | 42.654 | 0.00 | 0.00 |
| ATOM | 15309 | CB  | GLU | 1015 | 106.058 | 81.602 | 40.768 | 0.00 | 0.00 |
| ATOM | 15310 | HB2 | GLU | 1015 | 105.878 | 80.610 | 40.354 | 0.00 | 0.00 |



|      |       |     |     |      |         |        |        |      |      |
|------|-------|-----|-----|------|---------|--------|--------|------|------|
| ATOM | 15311 | HB3 | GLU | 1015 | 105.109 | 82.137 | 40.761 | 0.00 | 0.00 |
| ATOM | 15312 | CG  | GLU | 1015 | 106.932 | 82.433 | 39.694 | 0.00 | 0.00 |
| ATOM | 15313 | HG2 | GLU | 1015 | 107.896 | 81.938 | 39.585 | 0.00 | 0.00 |
| ATOM | 15314 | HG3 | GLU | 1015 | 106.360 | 82.328 | 38.772 | 0.00 | 0.00 |
| ATOM | 15315 | CD  | GLU | 1015 | 107.048 | 83.886 | 39.943 | 0.00 | 0.00 |
| ATOM | 15316 | OE1 | GLU | 1015 | 107.823 | 84.496 | 39.210 | 0.00 | 0.00 |
| ATOM | 15317 | OE2 | GLU | 1015 | 106.363 | 84.404 | 40.837 | 0.00 | 0.00 |
| ATOM | 15318 | C   | GLU | 1015 | 105.452 | 80.764 | 43.166 | 0.00 | 0.00 |
| ATOM | 15319 | O   | GLU | 1015 | 104.273 | 80.518 | 42.665 | 0.00 | 0.00 |
| ATOM | 15320 | N   | GLU | 1016 | 105.946 | 80.220 | 44.308 | 0.00 | 0.00 |
| ATOM | 15321 | H   | GLU | 1016 | 106.842 | 80.448 | 44.714 | 0.00 | 0.00 |
| ATOM | 15322 | CA  | GLU | 1016 | 105.018 | 79.435 | 45.161 | 0.00 | 0.00 |
| ATOM | 15323 | HA  | GLU | 1016 | 104.356 | 78.782 | 44.593 | 0.00 | 0.00 |
| ATOM | 15324 | CB  | GLU | 1016 | 105.813 | 78.517 | 46.131 | 0.00 | 0.00 |
| ATOM | 15325 | HB2 | GLU | 1016 | 106.407 | 79.038 | 46.882 | 0.00 | 0.00 |
| ATOM | 15326 | HB3 | GLU | 1016 | 105.106 | 78.127 | 46.864 | 0.00 | 0.00 |
| ATOM | 15327 | CG  | GLU | 1016 | 106.660 | 77.366 | 45.455 | 0.00 | 0.00 |
| ATOM | 15328 | HG2 | GLU | 1016 | 107.011 | 76.659 | 46.207 | 0.00 | 0.00 |
| ATOM | 15329 | HG3 | GLU | 1016 | 105.889 | 76.801 | 44.932 | 0.00 | 0.00 |
| ATOM | 15330 | CD  | GLU | 1016 | 107.781 | 77.766 | 44.462 | 0.00 | 0.00 |
| ATOM | 15331 | OE1 | GLU | 1016 | 108.628 | 78.684 | 44.688 | 0.00 | 0.00 |
| ATOM | 15332 | OE2 | GLU | 1016 | 107.741 | 77.193 | 43.336 | 0.00 | 0.00 |
| ATOM | 15333 | C   | GLU | 1016 | 104.055 | 80.277 | 46.056 | 0.00 | 0.00 |
| ATOM | 15334 | O   | GLU | 1016 | 104.333 | 81.345 | 46.603 | 0.00 | 0.00 |
| ATOM | 15335 | N   | VAL | 1017 | 102.862 | 79.763 | 46.218 | 0.00 | 0.00 |
| ATOM | 15336 | H   | VAL | 1017 | 102.687 | 78.815 | 45.914 | 0.00 | 0.00 |

|      |       |      |     |      |         |        |        |      |      |
|------|-------|------|-----|------|---------|--------|--------|------|------|
| ATOM | 15337 | CA   | VAL | 1017 | 101.690 | 80.508 | 46.718 | 0.00 | 0.00 |
| ATOM | 15338 | HA   | VAL | 1017 | 101.781 | 81.528 | 46.343 | 0.00 | 0.00 |
| ATOM | 15339 | CB   | VAL | 1017 | 100.314 | 79.945 | 46.121 | 0.00 | 0.00 |
| ATOM | 15340 | HB   | VAL | 1017 | 99.457  | 80.414 | 46.603 | 0.00 | 0.00 |
| ATOM | 15341 | CG1  | VAL | 1017 | 100.340 | 80.327 | 44.643 | 0.00 | 0.00 |
| ATOM | 15342 | 1HG1 | VAL | 1017 | 99.469  | 79.792 | 44.263 | 0.00 | 0.00 |
| ATOM | 15343 | 2HG1 | VAL | 1017 | 100.340 | 81.406 | 44.485 | 0.00 | 0.00 |
| ATOM | 15344 | 3HG1 | VAL | 1017 | 101.205 | 79.902 | 44.135 | 0.00 | 0.00 |
| ATOM | 15345 | CG2  | VAL | 1017 | 100.082 | 78.441 | 46.370 | 0.00 | 0.00 |
| ATOM | 15346 | 1HG2 | VAL | 1017 | 99.185  | 78.116 | 45.844 | 0.00 | 0.00 |
| ATOM | 15347 | 2HG2 | VAL | 1017 | 101.014 | 77.945 | 46.099 | 0.00 | 0.00 |
| ATOM | 15348 | 3HG2 | VAL | 1017 | 100.018 | 78.267 | 47.444 | 0.00 | 0.00 |
| ATOM | 15349 | C    | VAL | 1017 | 101.569 | 80.672 | 48.266 | 0.00 | 0.00 |
| ATOM | 15350 | O    | VAL | 1017 | 100.561 | 80.368 | 48.865 | 0.00 | 0.00 |
| ATOM | 15351 | N    | LYS | 1018 | 102.680 | 81.150 | 48.874 | 0.00 | 0.00 |
| ATOM | 15352 | H    | LYS | 1018 | 103.472 | 81.372 | 48.287 | 0.00 | 0.00 |
| ATOM | 15353 | CA   | LYS | 1018 | 102.826 | 81.480 | 50.286 | 0.00 | 0.00 |
| ATOM | 15354 | HA   | LYS | 1018 | 102.331 | 80.725 | 50.897 | 0.00 | 0.00 |
| ATOM | 15355 | CB   | LYS | 1018 | 104.228 | 81.580 | 50.761 | 0.00 | 0.00 |
| ATOM | 15356 | HB2  | LYS | 1018 | 104.724 | 82.498 | 50.445 | 0.00 | 0.00 |
| ATOM | 15357 | HB3  | LYS | 1018 | 104.899 | 80.756 | 50.519 | 0.00 | 0.00 |
| ATOM | 15358 | CG   | LYS | 1018 | 104.305 | 81.523 | 52.354 | 0.00 | 0.00 |
| ATOM | 15359 | HG2  | LYS | 1018 | 105.213 | 81.973 | 52.756 | 0.00 | 0.00 |
| ATOM | 15360 | HG3  | LYS | 1018 | 103.537 | 82.144 | 52.816 | 0.00 | 0.00 |
| ATOM | 15361 | CD   | LYS | 1018 | 104.387 | 80.092 | 52.964 | 0.00 | 0.00 |
| ATOM | 15362 | HD2  | LYS | 1018 | 103.526 | 79.507 | 52.641 | 0.00 | 0.00 |

|      |       |     |     |      |         |        |        |      |      |
|------|-------|-----|-----|------|---------|--------|--------|------|------|
| ATOM | 15363 | HD3 | LYS | 1018 | 105.310 | 79.560 | 52.737 | 0.00 | 0.00 |
| ATOM | 15364 | CE  | LYS | 1018 | 104.342 | 80.051 | 54.536 | 0.00 | 0.00 |
| ATOM | 15365 | HE2 | LYS | 1018 | 104.999 | 80.882 | 54.794 | 0.00 | 0.00 |
| ATOM | 15366 | HE3 | LYS | 1018 | 103.290 | 80.292 | 54.689 | 0.00 | 0.00 |
| ATOM | 15367 | NZ  | LYS | 1018 | 104.649 | 78.743 | 55.083 | 0.00 | 0.00 |
| ATOM | 15368 | HZ1 | LYS | 1018 | 105.553 | 78.426 | 54.764 | 0.00 | 0.00 |
| ATOM | 15369 | HZ2 | LYS | 1018 | 104.730 | 78.654 | 56.086 | 0.00 | 0.00 |
| ATOM | 15370 | HZ3 | LYS | 1018 | 103.873 | 78.134 | 54.864 | 0.00 | 0.00 |
| ATOM | 15371 | C   | LYS | 1018 | 102.147 | 82.702 | 50.708 | 0.00 | 0.00 |
| ATOM | 15372 | O   | LYS | 1018 | 102.403 | 83.732 | 50.118 | 0.00 | 0.00 |
| ATOM | 15373 | N   | PHE | 1019 | 101.253 | 82.659 | 51.662 | 0.00 | 0.00 |
| ATOM | 15374 | H   | PHE | 1019 | 101.033 | 81.744 | 52.030 | 0.00 | 0.00 |
| ATOM | 15375 | CA  | PHE | 1019 | 100.603 | 83.802 | 52.286 | 0.00 | 0.00 |
| ATOM | 15376 | HA  | PHE | 1019 | 100.447 | 84.529 | 51.490 | 0.00 | 0.00 |
| ATOM | 15377 | CB  | PHE | 1019 | 99.131  | 83.392 | 52.669 | 0.00 | 0.00 |
| ATOM | 15378 | HB2 | PHE | 1019 | 98.657  | 82.915 | 51.811 | 0.00 | 0.00 |
| ATOM | 15379 | HB3 | PHE | 1019 | 99.172  | 82.537 | 53.344 | 0.00 | 0.00 |
| ATOM | 15380 | CG  | PHE | 1019 | 98.203  | 84.371 | 53.284 | 0.00 | 0.00 |
| ATOM | 15381 | CD1 | PHE | 1019 | 97.663  | 85.318 | 52.392 | 0.00 | 0.00 |
| ATOM | 15382 | HD1 | PHE | 1019 | 97.789  | 85.272 | 51.320 | 0.00 | 0.00 |
| ATOM | 15383 | CE1 | PHE | 1019 | 97.033  | 86.430 | 52.924 | 0.00 | 0.00 |
| ATOM | 15384 | HE1 | PHE | 1019 | 96.689  | 87.169 | 52.215 | 0.00 | 0.00 |
| ATOM | 15385 | CZ  | PHE | 1019 | 96.789  | 86.494 | 54.329 | 0.00 | 0.00 |
| ATOM | 15386 | HZ  | PHE | 1019 | 96.312  | 87.345 | 54.793 | 0.00 | 0.00 |
| ATOM | 15387 | CE2 | PHE | 1019 | 97.265  | 85.523 | 55.218 | 0.00 | 0.00 |
| ATOM | 15388 | HE2 | PHE | 1019 | 97.012  | 85.594 | 56.266 | 0.00 | 0.00 |

|      |       |     |     |      |         |        |        |      |      |
|------|-------|-----|-----|------|---------|--------|--------|------|------|
| ATOM | 15389 | CD2 | PHE | 1019 | 98.040  | 84.457 | 54.707 | 0.00 | 0.00 |
| ATOM | 15390 | HD2 | PHE | 1019 | 98.348  | 83.663 | 55.371 | 0.00 | 0.00 |
| ATOM | 15391 | C   | PHE | 1019 | 101.300 | 84.398 | 53.518 | 0.00 | 0.00 |
| ATOM | 15392 | O   | PHE | 1019 | 101.781 | 83.627 | 54.341 | 0.00 | 0.00 |
| ATOM | 15393 | N   | GLY | 1020 | 101.134 | 85.688 | 53.720 | 0.00 | 0.00 |
| ATOM | 15394 | H   | GLY | 1020 | 100.706 | 86.267 | 53.011 | 0.00 | 0.00 |
| ATOM | 15395 | CA  | GLY | 1020 | 101.457 | 86.501 | 54.873 | 0.00 | 0.00 |
| ATOM | 15396 | HA2 | GLY | 1020 | 100.536 | 86.923 | 55.275 | 0.00 | 0.00 |
| ATOM | 15397 | HA3 | GLY | 1020 | 102.043 | 85.907 | 55.574 | 0.00 | 0.00 |
| ATOM | 15398 | C   | GLY | 1020 | 102.257 | 87.701 | 54.532 | 0.00 | 0.00 |
| ATOM | 15399 | O   | GLY | 1020 | 102.681 | 87.887 | 53.360 | 0.00 | 0.00 |
| ATOM | 15400 | N   | GLY | 1021 | 102.598 | 88.463 | 55.517 | 0.00 | 0.00 |
| ATOM | 15401 | H   | GLY | 1021 | 102.140 | 88.230 | 56.386 | 0.00 | 0.00 |
| ATOM | 15402 | CA  | GLY | 1021 | 103.362 | 89.757 | 55.246 | 0.00 | 0.00 |
| ATOM | 15403 | HA2 | GLY | 1021 | 102.850 | 90.297 | 54.450 | 0.00 | 0.00 |
| ATOM | 15404 | HA3 | GLY | 1021 | 103.480 | 90.328 | 56.167 | 0.00 | 0.00 |
| ATOM | 15405 | C   | GLY | 1021 | 104.768 | 89.458 | 54.764 | 0.00 | 0.00 |
| ATOM | 15406 | O   | GLY | 1021 | 105.447 | 88.605 | 55.323 | 0.00 | 0.00 |
| ATOM | 15407 | N   | GLY | 1022 | 105.187 | 90.042 | 53.627 | 0.00 | 0.00 |
| ATOM | 15408 | H   | GLY | 1022 | 104.708 | 90.852 | 53.260 | 0.00 | 0.00 |
| ATOM | 15409 | CA  | GLY | 1022 | 106.405 | 89.812 | 52.844 | 0.00 | 0.00 |
| ATOM | 15410 | HA2 | GLY | 1022 | 106.593 | 90.724 | 52.278 | 0.00 | 0.00 |
| ATOM | 15411 | HA3 | GLY | 1022 | 107.136 | 89.548 | 53.609 | 0.00 | 0.00 |
| ATOM | 15412 | C   | GLY | 1022 | 106.336 | 88.528 | 51.967 | 0.00 | 0.00 |
| ATOM | 15413 | O   | GLY | 1022 | 107.403 | 87.961 | 51.662 | 0.00 | 0.00 |
| ATOM | 15414 | N   | LYS | 1023 | 105.147 | 87.906 | 51.823 | 0.00 | 0.00 |

|      |       |     |     |      |         |        |        |      |      |
|------|-------|-----|-----|------|---------|--------|--------|------|------|
| ATOM | 15415 | H   | LYS | 1023 | 104.316 | 88.319 | 52.221 | 0.00 | 0.00 |
| ATOM | 15416 | CA  | LYS | 1023 | 104.886 | 86.625 | 51.142 | 0.00 | 0.00 |
| ATOM | 15417 | HA  | LYS | 1023 | 105.875 | 86.239 | 50.892 | 0.00 | 0.00 |
| ATOM | 15418 | CB  | LYS | 1023 | 104.164 | 85.630 | 52.007 | 0.00 | 0.00 |
| ATOM | 15419 | HB2 | LYS | 1023 | 103.113 | 85.914 | 52.067 | 0.00 | 0.00 |
| ATOM | 15420 | HB3 | LYS | 1023 | 104.189 | 84.633 | 51.567 | 0.00 | 0.00 |
| ATOM | 15421 | CG  | LYS | 1023 | 104.744 | 85.340 | 53.367 | 0.00 | 0.00 |
| ATOM | 15422 | HG2 | LYS | 1023 | 104.719 | 86.244 | 53.976 | 0.00 | 0.00 |
| ATOM | 15423 | HG3 | LYS | 1023 | 104.044 | 84.670 | 53.868 | 0.00 | 0.00 |
| ATOM | 15424 | CD  | LYS | 1023 | 106.213 | 84.878 | 53.444 | 0.00 | 0.00 |
| ATOM | 15425 | HD2 | LYS | 1023 | 106.351 | 84.046 | 52.753 | 0.00 | 0.00 |
| ATOM | 15426 | HD3 | LYS | 1023 | 106.946 | 85.658 | 53.240 | 0.00 | 0.00 |
| ATOM | 15427 | CE  | LYS | 1023 | 106.561 | 84.314 | 54.860 | 0.00 | 0.00 |
| ATOM | 15428 | HE2 | LYS | 1023 | 106.397 | 85.180 | 55.502 | 0.00 | 0.00 |
| ATOM | 15429 | HE3 | LYS | 1023 | 105.982 | 83.399 | 54.984 | 0.00 | 0.00 |
| ATOM | 15430 | NZ  | LYS | 1023 | 107.970 | 83.866 | 54.946 | 0.00 | 0.00 |
| ATOM | 15431 | HZ1 | LYS | 1023 | 108.342 | 84.078 | 55.861 | 0.00 | 0.00 |
| ATOM | 15432 | HZ2 | LYS | 1023 | 108.108 | 82.869 | 54.865 | 0.00 | 0.00 |
| ATOM | 15433 | HZ3 | LYS | 1023 | 108.531 | 84.344 | 54.255 | 0.00 | 0.00 |
| ATOM | 15434 | C   | LYS | 1023 | 104.191 | 86.826 | 49.692 | 0.00 | 0.00 |
| ATOM | 15435 | O   | LYS | 1023 | 103.909 | 88.003 | 49.411 | 0.00 | 0.00 |
| ATOM | 15436 | N   | VAL | 1024 | 103.969 | 85.824 | 48.857 | 0.00 | 0.00 |
| ATOM | 15437 | H   | VAL | 1024 | 104.142 | 84.874 | 49.152 | 0.00 | 0.00 |
| ATOM | 15438 | CA  | VAL | 1024 | 103.800 | 85.996 | 47.408 | 0.00 | 0.00 |
| ATOM | 15439 | HA  | VAL | 1024 | 104.517 | 86.650 | 46.911 | 0.00 | 0.00 |
| ATOM | 15440 | CB  | VAL | 1024 | 104.027 | 84.728 | 46.637 | 0.00 | 0.00 |

|      |       |      |     |      |         |        |        |      |      |
|------|-------|------|-----|------|---------|--------|--------|------|------|
| ATOM | 15441 | HB   | VAL | 1024 | 103.409 | 83.930 | 47.047 | 0.00 | 0.00 |
| ATOM | 15442 | CG1  | VAL | 1024 | 103.808 | 84.838 | 45.140 | 0.00 | 0.00 |
| ATOM | 15443 | 1HG1 | VAL | 1024 | 104.534 | 85.513 | 44.686 | 0.00 | 0.00 |
| ATOM | 15444 | 2HG1 | VAL | 1024 | 103.892 | 83.844 | 44.700 | 0.00 | 0.00 |
| ATOM | 15445 | 3HG1 | VAL | 1024 | 102.808 | 85.234 | 44.960 | 0.00 | 0.00 |
| ATOM | 15446 | CG2  | VAL | 1024 | 105.443 | 84.250 | 46.806 | 0.00 | 0.00 |
| ATOM | 15447 | 1HG2 | VAL | 1024 | 105.621 | 83.336 | 46.238 | 0.00 | 0.00 |
| ATOM | 15448 | 2HG2 | VAL | 1024 | 106.210 | 84.992 | 46.583 | 0.00 | 0.00 |
| ATOM | 15449 | 3HG2 | VAL | 1024 | 105.600 | 83.916 | 47.832 | 0.00 | 0.00 |
| ATOM | 15450 | C    | VAL | 1024 | 102.493 | 86.652 | 47.080 | 0.00 | 0.00 |
| ATOM | 15451 | O    | VAL | 1024 | 102.418 | 87.554 | 46.266 | 0.00 | 0.00 |
| ATOM | 15452 | N    | ILE | 1025 | 101.444 | 86.198 | 47.748 | 0.00 | 0.00 |
| ATOM | 15453 | H    | ILE | 1025 | 101.474 | 85.567 | 48.536 | 0.00 | 0.00 |
| ATOM | 15454 | CA   | ILE | 1025 | 100.061 | 86.466 | 47.227 | 0.00 | 0.00 |
| ATOM | 15455 | HA   | ILE | 1025 | 100.169 | 86.809 | 46.199 | 0.00 | 0.00 |
| ATOM | 15456 | CB   | ILE | 1025 | 99.218  | 85.118 | 47.148 | 0.00 | 0.00 |
| ATOM | 15457 | HB   | ILE | 1025 | 98.198  | 85.448 | 46.951 | 0.00 | 0.00 |
| ATOM | 15458 | CG2  | ILE | 1025 | 99.767  | 84.159 | 46.037 | 0.00 | 0.00 |
| ATOM | 15459 | 1HG2 | ILE | 1025 | 99.018  | 83.394 | 45.831 | 0.00 | 0.00 |
| ATOM | 15460 | 2HG2 | ILE | 1025 | 99.818  | 84.785 | 45.146 | 0.00 | 0.00 |
| ATOM | 15461 | 3HG2 | ILE | 1025 | 100.726 | 83.692 | 46.262 | 0.00 | 0.00 |
| ATOM | 15462 | CG1  | ILE | 1025 | 99.197  | 84.320 | 48.460 | 0.00 | 0.00 |
| ATOM | 15463 | 2HG1 | ILE | 1025 | 100.109 | 83.723 | 48.456 | 0.00 | 0.00 |
| ATOM | 15464 | 3HG1 | ILE | 1025 | 99.249  | 85.081 | 49.239 | 0.00 | 0.00 |
| ATOM | 15465 | CD1  | ILE | 1025 | 97.981  | 83.539 | 48.752 | 0.00 | 0.00 |
| ATOM | 15466 | 1HD1 | ILE | 1025 | 98.247  | 82.957 | 49.635 | 0.00 | 0.00 |

ATOM 15467 2HD1 ILE 1025 97.187 84.272 48.888 0.00 0.00  
ATOM 15468 3HD1 ILE 1025 97.737 82.763 48.026 0.00 0.00  
ATOM 15469 C ILE 1025 99.213 87.609 47.882 0.00 0.00  
ATOM 15470 O ILE 1025 98.322 87.356 48.697 0.00 0.00  
ATOM 15471 N ARG 1026 99.557 88.865 47.477 0.00 0.00  
ATOM 15472 H ARG 1026 100.274 88.925 46.768 0.00 0.00  
ATOM 15473 CA ARG 1026 99.278 90.125 48.139 0.00 0.00  
ATOM 15474 HA ARG 1026 98.378 89.956 48.729 0.00 0.00  
ATOM 15475 CB ARG 1026 100.384 90.428 49.093 0.00 0.00  
ATOM 15476 HB2 ARG 1026 101.313 90.395 48.524 0.00 0.00  
ATOM 15477 HB3 ARG 1026 100.164 91.405 49.524 0.00 0.00  
ATOM 15478 CG ARG 1026 100.375 89.424 50.220 0.00 0.00  
ATOM 15479 HG2 ARG 1026 99.366 89.194 50.561 0.00 0.00  
ATOM 15480 HG3 ARG 1026 100.848 88.468 49.999 0.00 0.00  
ATOM 15481 CD ARG 1026 101.181 90.069 51.447 0.00 0.00  
ATOM 15482 HD2 ARG 1026 100.644 90.992 51.664 0.00 0.00  
ATOM 15483 HD3 ARG 1026 101.267 89.393 52.298 0.00 0.00  
ATOM 15484 NE ARG 1026 102.633 90.290 51.039 0.00 0.00  
ATOM 15485 HE ARG 1026 103.019 89.522 50.509 0.00 0.00  
ATOM 15486 CZ ARG 1026 103.421 91.303 51.234 0.00 0.00  
ATOM 15487 NH1 ARG 1026 103.140 92.183 52.123 0.00 0.00  
ATOM 15488 1HH1 ARG 1026 103.842 92.790 52.521 0.00 0.00  
ATOM 15489 2HH1 ARG 1026 102.300 92.045 52.666 0.00 0.00  
ATOM 15490 NH2 ARG 1026 104.585 91.382 50.637 0.00 0.00  
ATOM 15491 1HH2 ARG 1026 105.197 92.058 51.071 0.00 0.00  
ATOM 15492 2HH2 ARG 1026 104.850 90.694 49.946 0.00 0.00

|      |       |     |     |      |         |        |        |      |      |
|------|-------|-----|-----|------|---------|--------|--------|------|------|
| ATOM | 15493 | C   | ARG | 1026 | 99.166  | 91.154 | 47.037 | 0.00 | 0.00 |
| ATOM | 15494 | O   | ARG | 1026 | 99.568  | 90.902 | 45.927 | 0.00 | 0.00 |
| ATOM | 15495 | N   | ASP | 1027 | 98.573  | 92.274 | 47.396 | 0.00 | 0.00 |
| ATOM | 15496 | H   | ASP | 1027 | 98.221  | 92.362 | 48.339 | 0.00 | 0.00 |
| ATOM | 15497 | CA  | ASP | 1027 | 98.297  | 93.382 | 46.492 | 0.00 | 0.00 |
| ATOM | 15498 | HA  | ASP | 1027 | 97.633  | 93.039 | 45.699 | 0.00 | 0.00 |
| ATOM | 15499 | CB  | ASP | 1027 | 97.597  | 94.485 | 47.212 | 0.00 | 0.00 |
| ATOM | 15500 | HB2 | ASP | 1027 | 96.645  | 94.098 | 47.575 | 0.00 | 0.00 |
| ATOM | 15501 | HB3 | ASP | 1027 | 98.229  | 94.781 | 48.050 | 0.00 | 0.00 |
| ATOM | 15502 | CG  | ASP | 1027 | 97.294  | 95.681 | 46.379 | 0.00 | 0.00 |
| ATOM | 15503 | OD1 | ASP | 1027 | 97.052  | 95.561 | 45.134 | 0.00 | 0.00 |
| ATOM | 15504 | OD2 | ASP | 1027 | 97.287  | 96.828 | 46.905 | 0.00 | 0.00 |
| ATOM | 15505 | C   | ASP | 1027 | 99.626  | 93.917 | 45.810 | 0.00 | 0.00 |
| ATOM | 15506 | O   | ASP | 1027 | 100.673 | 93.771 | 46.373 | 0.00 | 0.00 |
| ATOM | 15507 | N   | GLY | 1028 | 99.583  | 94.380 | 44.588 | 0.00 | 0.00 |
| ATOM | 15508 | H   | GLY | 1028 | 98.638  | 94.379 | 44.230 | 0.00 | 0.00 |
| ATOM | 15509 | CA  | GLY | 1028 | 100.654 | 94.636 | 43.640 | 0.00 | 0.00 |
| ATOM | 15510 | HA2 | GLY | 1028 | 100.220 | 95.273 | 42.870 | 0.00 | 0.00 |
| ATOM | 15511 | HA3 | GLY | 1028 | 101.423 | 95.212 | 44.155 | 0.00 | 0.00 |
| ATOM | 15512 | C   | GLY | 1028 | 101.299 | 93.418 | 42.978 | 0.00 | 0.00 |
| ATOM | 15513 | O   | GLY | 1028 | 101.484 | 93.409 | 41.743 | 0.00 | 0.00 |
| ATOM | 15514 | N   | MET | 1029 | 101.591 | 92.383 | 43.751 | 0.00 | 0.00 |
| ATOM | 15515 | H   | MET | 1029 | 101.232 | 92.451 | 44.693 | 0.00 | 0.00 |
| ATOM | 15516 | CA  | MET | 1029 | 102.250 | 91.101 | 43.503 | 0.00 | 0.00 |
| ATOM | 15517 | HA  | MET | 1029 | 102.767 | 91.057 | 42.545 | 0.00 | 0.00 |
| ATOM | 15518 | CB  | MET | 1029 | 103.299 | 90.852 | 44.609 | 0.00 | 0.00 |



|      |       |     |     |      |         |        |        |      |      |
|------|-------|-----|-----|------|---------|--------|--------|------|------|
| ATOM | 15519 | HB2 | MET | 1029 | 103.923 | 89.988 | 44.378 | 0.00 | 0.00 |
| ATOM | 15520 | HB3 | MET | 1029 | 104.052 | 91.637 | 44.535 | 0.00 | 0.00 |
| ATOM | 15521 | CG  | MET | 1029 | 102.704 | 90.746 | 46.051 | 0.00 | 0.00 |
| ATOM | 15522 | HG2 | MET | 1029 | 102.193 | 91.690 | 46.240 | 0.00 | 0.00 |
| ATOM | 15523 | HG3 | MET | 1029 | 102.007 | 89.921 | 46.192 | 0.00 | 0.00 |
| ATOM | 15524 | SD  | MET | 1029 | 103.920 | 91.003 | 47.382 | 0.00 | 0.00 |
| ATOM | 15525 | CE  | MET | 1029 | 103.748 | 92.820 | 47.613 | 0.00 | 0.00 |
| ATOM | 15526 | HE1 | MET | 1029 | 103.968 | 93.450 | 46.751 | 0.00 | 0.00 |
| ATOM | 15527 | HE2 | MET | 1029 | 102.720 | 93.038 | 47.901 | 0.00 | 0.00 |
| ATOM | 15528 | HE3 | MET | 1029 | 104.435 | 93.083 | 48.418 | 0.00 | 0.00 |
| ATOM | 15529 | C   | MET | 1029 | 101.189 | 90.001 | 43.279 | 0.00 | 0.00 |
| ATOM | 15530 | O   | MET | 1029 | 100.379 | 90.081 | 42.423 | 0.00 | 0.00 |
| ATOM | 15531 | N   | GLY | 1030 | 101.277 | 88.873 | 43.945 | 0.00 | 0.00 |
| ATOM | 15532 | H   | GLY | 1030 | 102.015 | 88.903 | 44.633 | 0.00 | 0.00 |
| ATOM | 15533 | CA  | GLY | 1030 | 100.467 | 87.678 | 43.671 | 0.00 | 0.00 |
| ATOM | 15534 | HA2 | GLY | 1030 | 100.654 | 87.237 | 42.692 | 0.00 | 0.00 |
| ATOM | 15535 | HA3 | GLY | 1030 | 100.976 | 86.929 | 44.277 | 0.00 | 0.00 |
| ATOM | 15536 | C   | GLY | 1030 | 98.904  | 87.728 | 44.018 | 0.00 | 0.00 |
| ATOM | 15537 | O   | GLY | 1030 | 98.240  | 86.700 | 43.862 | 0.00 | 0.00 |
| ATOM | 15538 | N   | GLN | 1031 | 98.361  | 88.881 | 44.388 | 0.00 | 0.00 |
| ATOM | 15539 | H   | GLN | 1031 | 98.903  | 89.731 | 44.450 | 0.00 | 0.00 |
| ATOM | 15540 | CA  | GLN | 1031 | 96.921  | 89.144 | 44.272 | 0.00 | 0.00 |
| ATOM | 15541 | HA  | GLN | 1031 | 96.370  | 88.210 | 44.162 | 0.00 | 0.00 |
| ATOM | 15542 | CB  | GLN | 1031 | 96.530  | 89.886 | 45.566 | 0.00 | 0.00 |
| ATOM | 15543 | HB2 | GLN | 1031 | 96.888  | 89.230 | 46.359 | 0.00 | 0.00 |
| ATOM | 15544 | HB3 | GLN | 1031 | 97.070  | 90.830 | 45.637 | 0.00 | 0.00 |

|      |       |      |     |      |        |        |        |      |      |
|------|-------|------|-----|------|--------|--------|--------|------|------|
| ATOM | 15545 | CG   | GLN | 1031 | 94.978 | 90.138 | 45.739 | 0.00 | 0.00 |
| ATOM | 15546 | HG2  | GLN | 1031 | 94.767 | 90.650 | 44.800 | 0.00 | 0.00 |
| ATOM | 15547 | HG3  | GLN | 1031 | 94.331 | 89.268 | 45.846 | 0.00 | 0.00 |
| ATOM | 15548 | CD   | GLN | 1031 | 94.664 | 90.951 | 46.989 | 0.00 | 0.00 |
| ATOM | 15549 | OE1  | GLN | 1031 | 94.373 | 90.406 | 48.065 | 0.00 | 0.00 |
| ATOM | 15550 | NE2  | GLN | 1031 | 94.809 | 92.264 | 46.899 | 0.00 | 0.00 |
| ATOM | 15551 | 1HE2 | GLN | 1031 | 95.001 | 92.726 | 47.776 | 0.00 | 0.00 |
| ATOM | 15552 | 2HE2 | GLN | 1031 | 95.008 | 92.625 | 45.977 | 0.00 | 0.00 |
| ATOM | 15553 | C    | GLN | 1031 | 96.650 | 90.093 | 43.138 | 0.00 | 0.00 |
| ATOM | 15554 | O    | GLN | 1031 | 97.242 | 91.166 | 42.970 | 0.00 | 0.00 |
| ATOM | 15555 | N    | GLY | 1032 | 95.783 | 89.747 | 42.205 | 0.00 | 0.00 |
| ATOM | 15556 | H    | GLY | 1032 | 95.270 | 88.880 | 42.138 | 0.00 | 0.00 |
| ATOM | 15557 | CA   | GLY | 1032 | 95.621 | 90.499 | 40.961 | 0.00 | 0.00 |
| ATOM | 15558 | HA2  | GLY | 1032 | 96.615 | 90.604 | 40.524 | 0.00 | 0.00 |
| ATOM | 15559 | HA3  | GLY | 1032 | 95.130 | 89.823 | 40.261 | 0.00 | 0.00 |
| ATOM | 15560 | C    | GLY | 1032 | 94.976 | 91.841 | 41.151 | 0.00 | 0.00 |
| ATOM | 15561 | O    | GLY | 1032 | 94.208 | 92.001 | 42.086 | 0.00 | 0.00 |
| ATOM | 15562 | N    | GLN | 1033 | 95.108 | 92.764 | 40.147 | 0.00 | 0.00 |
| ATOM | 15563 | H    | GLN | 1033 | 95.717 | 92.547 | 39.370 | 0.00 | 0.00 |
| ATOM | 15564 | CA   | GLN | 1033 | 94.376 | 94.001 | 40.059 | 0.00 | 0.00 |
| ATOM | 15565 | HA   | GLN | 1033 | 94.087 | 94.313 | 41.063 | 0.00 | 0.00 |
| ATOM | 15566 | CB   | GLN | 1033 | 95.271 | 95.055 | 39.337 | 0.00 | 0.00 |
| ATOM | 15567 | HB2  | GLN | 1033 | 95.466 | 94.683 | 38.332 | 0.00 | 0.00 |
| ATOM | 15568 | HB3  | GLN | 1033 | 94.702 | 95.982 | 39.411 | 0.00 | 0.00 |
| ATOM | 15569 | CG   | GLN | 1033 | 96.552 | 95.434 | 39.963 | 0.00 | 0.00 |
| ATOM | 15570 | HG2  | GLN | 1033 | 97.329 | 94.669 | 39.954 | 0.00 | 0.00 |

|      |       |      |     |      |        |        |        |      |      |
|------|-------|------|-----|------|--------|--------|--------|------|------|
| ATOM | 15571 | HG3  | GLN | 1033 | 96.973 | 96.302 | 39.454 | 0.00 | 0.00 |
| ATOM | 15572 | CD   | GLN | 1033 | 96.538 | 96.024 | 41.406 | 0.00 | 0.00 |
| ATOM | 15573 | OE1  | GLN | 1033 | 95.855 | 97.048 | 41.611 | 0.00 | 0.00 |
| ATOM | 15574 | NE2  | GLN | 1033 | 96.981 | 95.351 | 42.380 | 0.00 | 0.00 |
| ATOM | 15575 | 1HE2 | GLN | 1033 | 96.938 | 95.718 | 43.319 | 0.00 | 0.00 |
| ATOM | 15576 | 2HE2 | GLN | 1033 | 97.435 | 94.489 | 42.113 | 0.00 | 0.00 |
| ATOM | 15577 | C    | GLN | 1033 | 92.988 | 93.907 | 39.426 | 0.00 | 0.00 |
| ATOM | 15578 | O    | GLN | 1033 | 92.366 | 94.922 | 39.126 | 0.00 | 0.00 |
| ATOM | 15579 | N    | MET | 1034 | 92.402 | 92.706 | 39.244 | 0.00 | 0.00 |
| ATOM | 15580 | H    | MET | 1034 | 92.951 | 91.858 | 39.279 | 0.00 | 0.00 |
| ATOM | 15581 | CA   | MET | 1034 | 91.146 | 92.554 | 38.556 | 0.00 | 0.00 |
| ATOM | 15582 | HA   | MET | 1034 | 91.133 | 93.345 | 37.807 | 0.00 | 0.00 |
| ATOM | 15583 | CB   | MET | 1034 | 91.103 | 91.139 | 38.003 | 0.00 | 0.00 |
| ATOM | 15584 | HB2  | MET | 1034 | 90.294 | 91.178 | 37.274 | 0.00 | 0.00 |
| ATOM | 15585 | HB3  | MET | 1034 | 92.035 | 91.001 | 37.455 | 0.00 | 0.00 |
| ATOM | 15586 | CG   | MET | 1034 | 90.969 | 89.947 | 38.922 | 0.00 | 0.00 |
| ATOM | 15587 | HG2  | MET | 1034 | 90.402 | 90.293 | 39.786 | 0.00 | 0.00 |
| ATOM | 15588 | HG3  | MET | 1034 | 90.445 | 89.146 | 38.402 | 0.00 | 0.00 |
| ATOM | 15589 | SD   | MET | 1034 | 92.573 | 89.363 | 39.496 | 0.00 | 0.00 |
| ATOM | 15590 | CE   | MET | 1034 | 93.230 | 88.579 | 38.010 | 0.00 | 0.00 |
| ATOM | 15591 | HE1  | MET | 1034 | 94.000 | 87.940 | 38.442 | 0.00 | 0.00 |
| ATOM | 15592 | HE2  | MET | 1034 | 92.499 | 88.048 | 37.400 | 0.00 | 0.00 |
| ATOM | 15593 | HE3  | MET | 1034 | 93.691 | 89.314 | 37.350 | 0.00 | 0.00 |
| ATOM | 15594 | C    | MET | 1034 | 89.964 | 92.782 | 39.523 | 0.00 | 0.00 |
| ATOM | 15595 | O    | MET | 1034 | 90.177 | 93.022 | 40.673 | 0.00 | 0.00 |
| ATOM | 15596 | N    | LEU | 1035 | 88.739 | 92.570 | 39.031 | 0.00 | 0.00 |

|            |      |     |      |        |        |        |      |      |
|------------|------|-----|------|--------|--------|--------|------|------|
| ATOM 15597 | H    | LEU | 1035 | 88.633 | 92.109 | 38.139 | 0.00 | 0.00 |
| ATOM 15598 | CA   | LEU | 1035 | 87.481 | 92.761 | 39.773 | 0.00 | 0.00 |
| ATOM 15599 | HA   | LEU | 1035 | 87.574 | 93.698 | 40.321 | 0.00 | 0.00 |
| ATOM 15600 | CB   | LEU | 1035 | 86.382 | 92.903 | 38.737 | 0.00 | 0.00 |
| ATOM 15601 | HB2  | LEU | 1035 | 86.366 | 91.996 | 38.133 | 0.00 | 0.00 |
| ATOM 15602 | HB3  | LEU | 1035 | 85.392 | 93.101 | 39.149 | 0.00 | 0.00 |
| ATOM 15603 | CG   | LEU | 1035 | 86.595 | 94.108 | 37.725 | 0.00 | 0.00 |
| ATOM 15604 | HG   | LEU | 1035 | 87.555 | 93.959 | 37.231 | 0.00 | 0.00 |
| ATOM 15605 | CD1  | LEU | 1035 | 85.528 | 93.978 | 36.648 | 0.00 | 0.00 |
| ATOM 15606 | 1HD1 | LEU | 1035 | 85.858 | 94.620 | 35.832 | 0.00 | 0.00 |
| ATOM 15607 | 2HD1 | LEU | 1035 | 85.517 | 92.936 | 36.329 | 0.00 | 0.00 |
| ATOM 15608 | 3HD1 | LEU | 1035 | 84.539 | 94.269 | 37.004 | 0.00 | 0.00 |
| ATOM 15609 | CD2  | LEU | 1035 | 86.525 | 95.493 | 38.428 | 0.00 | 0.00 |
| ATOM 15610 | 1HD2 | LEU | 1035 | 87.351 | 95.641 | 39.125 | 0.00 | 0.00 |
| ATOM 15611 | 2HD2 | LEU | 1035 | 86.556 | 96.261 | 37.656 | 0.00 | 0.00 |
| ATOM 15612 | 3HD2 | LEU | 1035 | 85.621 | 95.586 | 39.030 | 0.00 | 0.00 |
| ATOM 15613 | C    | LEU | 1035 | 87.252 | 91.650 | 40.780 | 0.00 | 0.00 |
| ATOM 15614 | O    | LEU | 1035 | 87.700 | 90.532 | 40.733 | 0.00 | 0.00 |
| ATOM 15615 | N    | ALA | 1036 | 86.398 | 91.909 | 41.771 | 0.00 | 0.00 |
| ATOM 15616 | H    | ALA | 1036 | 86.004 | 92.834 | 41.868 | 0.00 | 0.00 |
| ATOM 15617 | CA   | ALA | 1036 | 85.933 | 91.015 | 42.755 | 0.00 | 0.00 |
| ATOM 15618 | HA   | ALA | 1036 | 86.736 | 90.580 | 43.350 | 0.00 | 0.00 |
| ATOM 15619 | CB   | ALA | 1036 | 84.918 | 91.778 | 43.701 | 0.00 | 0.00 |
| ATOM 15620 | HB1  | ALA | 1036 | 85.280 | 92.716 | 44.123 | 0.00 | 0.00 |
| ATOM 15621 | HB2  | ALA | 1036 | 84.045 | 92.013 | 43.093 | 0.00 | 0.00 |
| ATOM 15622 | HB3  | ALA | 1036 | 84.621 | 91.101 | 44.502 | 0.00 | 0.00 |

|      |       |     |     |      |        |        |        |      |      |
|------|-------|-----|-----|------|--------|--------|--------|------|------|
| ATOM | 15623 | C   | ALA | 1036 | 85.239 | 89.741 | 42.180 | 0.00 | 0.00 |
| ATOM | 15624 | O   | ALA | 1036 | 85.187 | 88.728 | 42.839 | 0.00 | 0.00 |
| ATOM | 15625 | N   | ALA | 1037 | 84.770 | 89.857 | 40.921 | 0.00 | 0.00 |
| ATOM | 15626 | H   | ALA | 1037 | 84.609 | 90.785 | 40.559 | 0.00 | 0.00 |
| ATOM | 15627 | CA  | ALA | 1037 | 84.200 | 88.700 | 40.192 | 0.00 | 0.00 |
| ATOM | 15628 | HA  | ALA | 1037 | 83.672 | 88.044 | 40.885 | 0.00 | 0.00 |
| ATOM | 15629 | CB  | ALA | 1037 | 83.212 | 89.376 | 39.172 | 0.00 | 0.00 |
| ATOM | 15630 | HB1 | ALA | 1037 | 82.554 | 90.014 | 39.762 | 0.00 | 0.00 |
| ATOM | 15631 | HB2 | ALA | 1037 | 83.771 | 89.977 | 38.455 | 0.00 | 0.00 |
| ATOM | 15632 | HB3 | ALA | 1037 | 82.567 | 88.629 | 38.710 | 0.00 | 0.00 |
| ATOM | 15633 | C   | ALA | 1037 | 85.121 | 87.871 | 39.332 | 0.00 | 0.00 |
| ATOM | 15634 | O   | ALA | 1037 | 84.733 | 86.848 | 38.841 | 0.00 | 0.00 |
| ATOM | 15635 | N   | ASP | 1038 | 86.248 | 88.324 | 38.894 | 0.00 | 0.00 |
| ATOM | 15636 | H   | ASP | 1038 | 86.610 | 89.132 | 39.381 | 0.00 | 0.00 |
| ATOM | 15637 | CA  | ASP | 1038 | 87.178 | 87.608 | 37.988 | 0.00 | 0.00 |
| ATOM | 15638 | HA  | ASP | 1038 | 86.564 | 86.858 | 37.491 | 0.00 | 0.00 |
| ATOM | 15639 | CB  | ASP | 1038 | 87.696 | 88.638 | 37.057 | 0.00 | 0.00 |
| ATOM | 15640 | HB2 | ASP | 1038 | 86.804 | 89.118 | 36.655 | 0.00 | 0.00 |
| ATOM | 15641 | HB3 | ASP | 1038 | 88.370 | 89.333 | 37.557 | 0.00 | 0.00 |
| ATOM | 15642 | CG  | ASP | 1038 | 88.614 | 87.952 | 36.025 | 0.00 | 0.00 |
| ATOM | 15643 | OD1 | ASP | 1038 | 88.027 | 87.454 | 35.026 | 0.00 | 0.00 |
| ATOM | 15644 | OD2 | ASP | 1038 | 89.871 | 87.963 | 36.128 | 0.00 | 0.00 |
| ATOM | 15645 | C   | ASP | 1038 | 88.278 | 86.823 | 38.693 | 0.00 | 0.00 |
| ATOM | 15646 | O   | ASP | 1038 | 88.687 | 85.808 | 38.150 | 0.00 | 0.00 |
| ATOM | 15647 | N   | CYS | 1039 | 88.540 | 87.107 | 40.007 | 0.00 | 0.00 |
| ATOM | 15648 | H   | CYS | 1039 | 88.147 | 87.914 | 40.471 | 0.00 | 0.00 |

|      |       |      |     |      |        |        |        |      |      |
|------|-------|------|-----|------|--------|--------|--------|------|------|
| ATOM | 15649 | CA   | CYS | 1039 | 89.216 | 86.278 | 40.925 | 0.00 | 0.00 |
| ATOM | 15650 | HA   | CYS | 1039 | 89.847 | 85.577 | 40.378 | 0.00 | 0.00 |
| ATOM | 15651 | CB   | CYS | 1039 | 90.082 | 87.089 | 41.925 | 0.00 | 0.00 |
| ATOM | 15652 | HB2  | CYS | 1039 | 90.487 | 86.431 | 42.695 | 0.00 | 0.00 |
| ATOM | 15653 | HB3  | CYS | 1039 | 90.932 | 87.531 | 41.405 | 0.00 | 0.00 |
| ATOM | 15654 | SG   | CYS | 1039 | 89.077 | 88.382 | 42.791 | 0.00 | 0.00 |
| ATOM | 15655 | HG   | CYS | 1039 | 88.951 | 89.273 | 41.805 | 0.00 | 0.00 |
| ATOM | 15656 | C    | CYS | 1039 | 88.283 | 85.345 | 41.713 | 0.00 | 0.00 |
| ATOM | 15657 | O    | CYS | 1039 | 87.116 | 85.737 | 42.017 | 0.00 | 0.00 |
| ATOM | 15658 | N    | VAL | 1040 | 88.752 | 84.148 | 42.199 | 0.00 | 0.00 |
| ATOM | 15659 | H    | VAL | 1040 | 89.670 | 83.940 | 41.832 | 0.00 | 0.00 |
| ATOM | 15660 | CA   | VAL | 1040 | 87.980 | 83.299 | 43.024 | 0.00 | 0.00 |
| ATOM | 15661 | HA   | VAL | 1040 | 87.009 | 83.324 | 42.531 | 0.00 | 0.00 |
| ATOM | 15662 | CB   | VAL | 1040 | 88.615 | 81.904 | 43.117 | 0.00 | 0.00 |
| ATOM | 15663 | HB   | VAL | 1040 | 88.098 | 81.116 | 43.664 | 0.00 | 0.00 |
| ATOM | 15664 | CG1  | VAL | 1040 | 88.636 | 81.345 | 41.738 | 0.00 | 0.00 |
| ATOM | 15665 | 1HG1 | VAL | 1040 | 87.593 | 81.209 | 41.452 | 0.00 | 0.00 |
| ATOM | 15666 | 2HG1 | VAL | 1040 | 89.220 | 81.880 | 40.989 | 0.00 | 0.00 |
| ATOM | 15667 | 3HG1 | VAL | 1040 | 88.999 | 80.318 | 41.779 | 0.00 | 0.00 |
| ATOM | 15668 | CG2  | VAL | 1040 | 90.041 | 81.880 | 43.717 | 0.00 | 0.00 |
| ATOM | 15669 | 1HG2 | VAL | 1040 | 90.040 | 82.391 | 44.680 | 0.00 | 0.00 |
| ATOM | 15670 | 2HG2 | VAL | 1040 | 90.316 | 80.834 | 43.847 | 0.00 | 0.00 |
| ATOM | 15671 | 3HG2 | VAL | 1040 | 90.687 | 82.404 | 43.013 | 0.00 | 0.00 |
| ATOM | 15672 | C    | VAL | 1040 | 87.738 | 83.809 | 44.450 | 0.00 | 0.00 |
| ATOM | 15673 | O    | VAL | 1040 | 88.501 | 84.582 | 44.984 | 0.00 | 0.00 |
| ATOM | 15674 | N    | ASP | 1041 | 86.667 | 83.290 | 45.085 | 0.00 | 0.00 |

|      |       |      |     |      |        |        |        |      |      |
|------|-------|------|-----|------|--------|--------|--------|------|------|
| ATOM | 15675 | H    | ASP | 1041 | 85.972 | 82.688 | 44.667 | 0.00 | 0.00 |
| ATOM | 15676 | CA   | ASP | 1041 | 86.230 | 83.917 | 46.412 | 0.00 | 0.00 |
| ATOM | 15677 | HA   | ASP | 1041 | 86.239 | 85.004 | 46.325 | 0.00 | 0.00 |
| ATOM | 15678 | CB   | ASP | 1041 | 84.711 | 83.510 | 46.661 | 0.00 | 0.00 |
| ATOM | 15679 | HB2  | ASP | 1041 | 84.674 | 82.440 | 46.866 | 0.00 | 0.00 |
| ATOM | 15680 | HB3  | ASP | 1041 | 84.411 | 84.053 | 47.557 | 0.00 | 0.00 |
| ATOM | 15681 | CG   | ASP | 1041 | 83.659 | 83.822 | 45.544 | 0.00 | 0.00 |
| ATOM | 15682 | OD1  | ASP | 1041 | 82.741 | 83.026 | 45.347 | 0.00 | 0.00 |
| ATOM | 15683 | OD2  | ASP | 1041 | 83.737 | 84.839 | 44.862 | 0.00 | 0.00 |
| ATOM | 15684 | C    | ASP | 1041 | 87.047 | 83.258 | 47.608 | 0.00 | 0.00 |
| ATOM | 15685 | O    | ASP | 1041 | 87.150 | 83.775 | 48.747 | 0.00 | 0.00 |
| ATOM | 15686 | N    | LEU | 1042 | 87.593 | 82.066 | 47.304 | 0.00 | 0.00 |
| ATOM | 15687 | H    | LEU | 1042 | 87.529 | 81.759 | 46.344 | 0.00 | 0.00 |
| ATOM | 15688 | CA   | LEU | 1042 | 88.440 | 81.183 | 48.207 | 0.00 | 0.00 |
| ATOM | 15689 | HA   | LEU | 1042 | 89.009 | 81.844 | 48.862 | 0.00 | 0.00 |
| ATOM | 15690 | CB   | LEU | 1042 | 87.363 | 80.420 | 49.040 | 0.00 | 0.00 |
| ATOM | 15691 | HB2  | LEU | 1042 | 86.795 | 81.107 | 49.666 | 0.00 | 0.00 |
| ATOM | 15692 | HB3  | LEU | 1042 | 86.599 | 80.095 | 48.333 | 0.00 | 0.00 |
| ATOM | 15693 | CG   | LEU | 1042 | 87.903 | 79.222 | 49.825 | 0.00 | 0.00 |
| ATOM | 15694 | HG   | LEU | 1042 | 88.606 | 78.600 | 49.272 | 0.00 | 0.00 |
| ATOM | 15695 | CD1  | LEU | 1042 | 88.791 | 79.606 | 51.039 | 0.00 | 0.00 |
| ATOM | 15696 | 1HD1 | LEU | 1042 | 88.364 | 80.360 | 51.701 | 0.00 | 0.00 |
| ATOM | 15697 | 2HD1 | LEU | 1042 | 88.906 | 78.766 | 51.725 | 0.00 | 0.00 |
| ATOM | 15698 | 3HD1 | LEU | 1042 | 89.752 | 79.949 | 50.656 | 0.00 | 0.00 |
| ATOM | 15699 | CD2  | LEU | 1042 | 86.792 | 78.241 | 50.246 | 0.00 | 0.00 |
| ATOM | 15700 | 1HD2 | LEU | 1042 | 87.204 | 77.497 | 50.928 | 0.00 | 0.00 |

|            |      |     |      |        |        |        |      |      |
|------------|------|-----|------|--------|--------|--------|------|------|
| ATOM 15701 | 2HD2 | LEU | 1042 | 86.054 | 78.773 | 50.847 | 0.00 | 0.00 |
| ATOM 15702 | 3HD2 | LEU | 1042 | 86.370 | 77.742 | 49.373 | 0.00 | 0.00 |
| ATOM 15703 | C    | LEU | 1042 | 89.298 | 80.152 | 47.440 | 0.00 | 0.00 |
| ATOM 15704 | O    | LEU | 1042 | 88.842 | 79.439 | 46.529 | 0.00 | 0.00 |
| ATOM 15705 | N    | VAL | 1043 | 90.585 | 80.177 | 47.818 | 0.00 | 0.00 |
| ATOM 15706 | H    | VAL | 1043 | 90.806 | 80.776 | 48.601 | 0.00 | 0.00 |
| ATOM 15707 | CA   | VAL | 1043 | 91.642 | 79.351 | 47.260 | 0.00 | 0.00 |
| ATOM 15708 | HA   | VAL | 1043 | 91.257 | 78.691 | 46.483 | 0.00 | 0.00 |
| ATOM 15709 | CB   | VAL | 1043 | 92.668 | 80.135 | 46.333 | 0.00 | 0.00 |
| ATOM 15710 | HB   | VAL | 1043 | 92.035 | 80.696 | 45.646 | 0.00 | 0.00 |
| ATOM 15711 | CG1  | VAL | 1043 | 93.497 | 81.134 | 47.089 | 0.00 | 0.00 |
| ATOM 15712 | 1HG1 | VAL | 1043 | 92.730 | 81.822 | 47.443 | 0.00 | 0.00 |
| ATOM 15713 | 2HG1 | VAL | 1043 | 94.081 | 80.688 | 47.894 | 0.00 | 0.00 |
| ATOM 15714 | 3HG1 | VAL | 1043 | 94.144 | 81.626 | 46.363 | 0.00 | 0.00 |
| ATOM 15715 | CG2  | VAL | 1043 | 93.490 | 79.119 | 45.519 | 0.00 | 0.00 |
| ATOM 15716 | 1HG2 | VAL | 1043 | 93.988 | 78.414 | 46.185 | 0.00 | 0.00 |
| ATOM 15717 | 2HG2 | VAL | 1043 | 92.714 | 78.597 | 44.959 | 0.00 | 0.00 |
| ATOM 15718 | 3HG2 | VAL | 1043 | 94.107 | 79.709 | 44.841 | 0.00 | 0.00 |
| ATOM 15719 | C    | VAL | 1043 | 92.249 | 78.472 | 48.324 | 0.00 | 0.00 |
| ATOM 15720 | O    | VAL | 1043 | 92.619 | 78.995 | 49.385 | 0.00 | 0.00 |
| ATOM 15721 | N    | LEU | 1044 | 92.220 | 77.136 | 48.079 | 0.00 | 0.00 |
| ATOM 15722 | H    | LEU | 1044 | 91.811 | 76.823 | 47.210 | 0.00 | 0.00 |
| ATOM 15723 | CA   | LEU | 1044 | 92.863 | 76.100 | 48.918 | 0.00 | 0.00 |
| ATOM 15724 | HA   | LEU | 1044 | 92.993 | 76.444 | 49.944 | 0.00 | 0.00 |
| ATOM 15725 | CB   | LEU | 1044 | 91.875 | 74.928 | 48.923 | 0.00 | 0.00 |
| ATOM 15726 | HB2  | LEU | 1044 | 90.902 | 75.253 | 49.293 | 0.00 | 0.00 |



|      |       |      |     |      |        |        |        |      |      |
|------|-------|------|-----|------|--------|--------|--------|------|------|
| ATOM | 15727 | HB3  | LEU | 1044 | 91.883 | 74.542 | 47.903 | 0.00 | 0.00 |
| ATOM | 15728 | CG   | LEU | 1044 | 92.105 | 73.805 | 49.933 | 0.00 | 0.00 |
| ATOM | 15729 | HG   | LEU | 1044 | 92.341 | 74.200 | 50.921 | 0.00 | 0.00 |
| ATOM | 15730 | CD1  | LEU | 1044 | 90.898 | 72.974 | 50.063 | 0.00 | 0.00 |
| ATOM | 15731 | 1HD1 | LEU | 1044 | 90.605 | 72.582 | 49.089 | 0.00 | 0.00 |
| ATOM | 15732 | 2HD1 | LEU | 1044 | 91.079 | 72.211 | 50.820 | 0.00 | 0.00 |
| ATOM | 15733 | 3HD1 | LEU | 1044 | 90.093 | 73.598 | 50.450 | 0.00 | 0.00 |
| ATOM | 15734 | CD2  | LEU | 1044 | 93.206 | 72.754 | 49.620 | 0.00 | 0.00 |
| ATOM | 15735 | 1HD2 | LEU | 1044 | 93.089 | 72.401 | 48.596 | 0.00 | 0.00 |
| ATOM | 15736 | 2HD2 | LEU | 1044 | 94.189 | 73.224 | 49.600 | 0.00 | 0.00 |
| ATOM | 15737 | 3HD2 | LEU | 1044 | 93.189 | 71.938 | 50.342 | 0.00 | 0.00 |
| ATOM | 15738 | C    | LEU | 1044 | 94.278 | 75.789 | 48.338 | 0.00 | 0.00 |
| ATOM | 15739 | O    | LEU | 1044 | 94.374 | 75.276 | 47.231 | 0.00 | 0.00 |
| ATOM | 15740 | N    | THR | 1045 | 95.368 | 76.141 | 49.015 | 0.00 | 0.00 |
| ATOM | 15741 | H    | THR | 1045 | 95.187 | 76.502 | 49.940 | 0.00 | 0.00 |
| ATOM | 15742 | CA   | THR | 1045 | 96.711 | 76.315 | 48.514 | 0.00 | 0.00 |
| ATOM | 15743 | HA   | THR | 1045 | 96.623 | 76.294 | 47.428 | 0.00 | 0.00 |
| ATOM | 15744 | CB   | THR | 1045 | 97.207 | 77.737 | 48.753 | 0.00 | 0.00 |
| ATOM | 15745 | HB   | THR | 1045 | 98.213 | 77.842 | 48.347 | 0.00 | 0.00 |
| ATOM | 15746 | CG2  | THR | 1045 | 96.376 | 78.765 | 48.032 | 0.00 | 0.00 |
| ATOM | 15747 | 1HG2 | THR | 1045 | 95.300 | 78.658 | 48.167 | 0.00 | 0.00 |
| ATOM | 15748 | 2HG2 | THR | 1045 | 96.797 | 79.680 | 48.448 | 0.00 | 0.00 |
| ATOM | 15749 | 3HG2 | THR | 1045 | 96.680 | 78.720 | 46.986 | 0.00 | 0.00 |
| ATOM | 15750 | OG1  | THR | 1045 | 97.275 | 78.096 | 50.125 | 0.00 | 0.00 |
| ATOM | 15751 | HG1  | THR | 1045 | 96.483 | 77.721 | 50.516 | 0.00 | 0.00 |
| ATOM | 15752 | C    | THR | 1045 | 97.687 | 75.371 | 49.071 | 0.00 | 0.00 |

|      |       |      |     |      |         |        |        |      |      |
|------|-------|------|-----|------|---------|--------|--------|------|------|
| ATOM | 15753 | O    | THR | 1045 | 97.601  | 74.994 | 50.262 | 0.00 | 0.00 |
| ATOM | 15754 | N    | ASN | 1046 | 98.621  | 74.951 | 48.278 | 0.00 | 0.00 |
| ATOM | 15755 | H    | ASN | 1046 | 98.630  | 75.248 | 47.313 | 0.00 | 0.00 |
| ATOM | 15756 | CA   | ASN | 1046 | 99.686  | 74.094 | 48.625 | 0.00 | 0.00 |
| ATOM | 15757 | HA   | ASN | 1046 | 100.080 | 73.753 | 47.667 | 0.00 | 0.00 |
| ATOM | 15758 | CB   | ASN | 1046 | 100.858 | 75.049 | 49.143 | 0.00 | 0.00 |
| ATOM | 15759 | HB2  | ASN | 1046 | 100.982 | 75.909 | 48.484 | 0.00 | 0.00 |
| ATOM | 15760 | HB3  | ASN | 1046 | 100.578 | 75.372 | 50.146 | 0.00 | 0.00 |
| ATOM | 15761 | CG   | ASN | 1046 | 102.168 | 74.281 | 49.153 | 0.00 | 0.00 |
| ATOM | 15762 | OD1  | ASN | 1046 | 102.272 | 73.171 | 48.613 | 0.00 | 0.00 |
| ATOM | 15763 | ND2  | ASN | 1046 | 103.055 | 74.713 | 49.975 | 0.00 | 0.00 |
| ATOM | 15764 | 1HD2 | ASN | 1046 | 103.885 | 74.145 | 50.067 | 0.00 | 0.00 |
| ATOM | 15765 | 2HD2 | ASN | 1046 | 103.137 | 75.670 | 50.286 | 0.00 | 0.00 |
| ATOM | 15766 | C    | ASN | 1046 | 99.389  | 72.763 | 49.438 | 0.00 | 0.00 |
| ATOM | 15767 | O    | ASN | 1046 | 100.236 | 72.312 | 50.191 | 0.00 | 0.00 |
| ATOM | 15768 | N    | ALA | 1047 | 98.231  | 72.116 | 49.246 | 0.00 | 0.00 |
| ATOM | 15769 | H    | ALA | 1047 | 97.509  | 72.578 | 48.711 | 0.00 | 0.00 |
| ATOM | 15770 | CA   | ALA | 1047 | 97.865  | 70.893 | 49.948 | 0.00 | 0.00 |
| ATOM | 15771 | HA   | ALA | 1047 | 98.204  | 70.718 | 50.969 | 0.00 | 0.00 |
| ATOM | 15772 | CB   | ALA | 1047 | 96.391  | 70.936 | 50.132 | 0.00 | 0.00 |
| ATOM | 15773 | HB1  | ALA | 1047 | 96.073  | 71.958 | 50.339 | 0.00 | 0.00 |
| ATOM | 15774 | HB2  | ALA | 1047 | 95.972  | 70.719 | 49.150 | 0.00 | 0.00 |
| ATOM | 15775 | HB3  | ALA | 1047 | 95.965  | 70.206 | 50.821 | 0.00 | 0.00 |
| ATOM | 15776 | C    | ALA | 1047 | 98.236  | 69.682 | 49.055 | 0.00 | 0.00 |
| ATOM | 15777 | O    | ALA | 1047 | 99.068  | 69.840 | 48.142 | 0.00 | 0.00 |
| ATOM | 15778 | N    | LEU | 1048 | 97.737  | 68.486 | 49.343 | 0.00 | 0.00 |

|            |      |     |      |         |        |        |      |      |
|------------|------|-----|------|---------|--------|--------|------|------|
| ATOM 15779 | H    | LEU | 1048 | 97.373  | 68.284 | 50.263 | 0.00 | 0.00 |
| ATOM 15780 | CA   | LEU | 1048 | 97.943  | 67.303 | 48.493 | 0.00 | 0.00 |
| ATOM 15781 | HA   | LEU | 1048 | 98.362  | 67.649 | 47.548 | 0.00 | 0.00 |
| ATOM 15782 | CB   | LEU | 1048 | 98.959  | 66.338 | 49.212 | 0.00 | 0.00 |
| ATOM 15783 | HB2  | LEU | 1048 | 99.751  | 66.960 | 49.631 | 0.00 | 0.00 |
| ATOM 15784 | HB3  | LEU | 1048 | 98.530  | 65.766 | 50.035 | 0.00 | 0.00 |
| ATOM 15785 | CG   | LEU | 1048 | 99.628  | 65.359 | 48.331 | 0.00 | 0.00 |
| ATOM 15786 | HG   | LEU | 1048 | 99.787  | 65.823 | 47.357 | 0.00 | 0.00 |
| ATOM 15787 | CD1  | LEU | 1048 | 101.087 | 65.033 | 48.789 | 0.00 | 0.00 |
| ATOM 15788 | 1HD1 | LEU | 1048 | 101.526 | 64.222 | 48.207 | 0.00 | 0.00 |
| ATOM 15789 | 2HD1 | LEU | 1048 | 101.632 | 65.958 | 48.603 | 0.00 | 0.00 |
| ATOM 15790 | 3HD1 | LEU | 1048 | 100.997 | 64.811 | 49.852 | 0.00 | 0.00 |
| ATOM 15791 | CD2  | LEU | 1048 | 98.913  | 64.006 | 48.090 | 0.00 | 0.00 |
| ATOM 15792 | 1HD2 | LEU | 1048 | 98.056  | 64.194 | 47.444 | 0.00 | 0.00 |
| ATOM 15793 | 2HD2 | LEU | 1048 | 99.597  | 63.319 | 47.590 | 0.00 | 0.00 |
| ATOM 15794 | 3HD2 | LEU | 1048 | 98.535  | 63.685 | 49.061 | 0.00 | 0.00 |
| ATOM 15795 | C    | LEU | 1048 | 96.677  | 66.561 | 48.262 | 0.00 | 0.00 |
| ATOM 15796 | O    | LEU | 1048 | 95.927  | 66.212 | 49.189 | 0.00 | 0.00 |
| ATOM 15797 | N    | ILE | 1049 | 96.265  | 66.321 | 46.927 | 0.00 | 0.00 |
| ATOM 15798 | H    | ILE | 1049 | 96.956  | 66.562 | 46.230 | 0.00 | 0.00 |
| ATOM 15799 | CA   | ILE | 1049 | 94.983  | 65.786 | 46.497 | 0.00 | 0.00 |
| ATOM 15800 | HA   | ILE | 1049 | 94.262  | 66.047 | 47.272 | 0.00 | 0.00 |
| ATOM 15801 | CB   | ILE | 1049 | 94.529  | 66.302 | 45.083 | 0.00 | 0.00 |
| ATOM 15802 | HB   | ILE | 1049 | 95.348  | 66.134 | 44.382 | 0.00 | 0.00 |
| ATOM 15803 | CG2  | ILE | 1049 | 93.267  | 65.514 | 44.662 | 0.00 | 0.00 |
| ATOM 15804 | 1HG2 | ILE | 1049 | 93.525  | 64.467 | 44.504 | 0.00 | 0.00 |

|      |       |      |     |      |        |        |        |      |      |
|------|-------|------|-----|------|--------|--------|--------|------|------|
| ATOM | 15805 | 2HG2 | ILE | 1049 | 92.419 | 65.799 | 45.285 | 0.00 | 0.00 |
| ATOM | 15806 | 3HG2 | ILE | 1049 | 93.150 | 65.813 | 43.620 | 0.00 | 0.00 |
| ATOM | 15807 | CG1  | ILE | 1049 | 94.237 | 67.813 | 45.192 | 0.00 | 0.00 |
| ATOM | 15808 | 2HG1 | ILE | 1049 | 93.340 | 68.059 | 45.760 | 0.00 | 0.00 |
| ATOM | 15809 | 3HG1 | ILE | 1049 | 95.060 | 68.412 | 45.583 | 0.00 | 0.00 |
| ATOM | 15810 | CD1  | ILE | 1049 | 93.996 | 68.488 | 43.831 | 0.00 | 0.00 |
| ATOM | 15811 | 1HD1 | ILE | 1049 | 93.020 | 68.190 | 43.447 | 0.00 | 0.00 |
| ATOM | 15812 | 2HD1 | ILE | 1049 | 94.050 | 69.561 | 44.014 | 0.00 | 0.00 |
| ATOM | 15813 | 3HD1 | ILE | 1049 | 94.688 | 68.164 | 43.054 | 0.00 | 0.00 |
| ATOM | 15814 | C    | ILE | 1049 | 94.886 | 64.265 | 46.548 | 0.00 | 0.00 |
| ATOM | 15815 | O    | ILE | 1049 | 95.629 | 63.721 | 45.794 | 0.00 | 0.00 |
| ATOM | 15816 | N    | VAL | 1050 | 94.005 | 63.640 | 47.403 | 0.00 | 0.00 |
| ATOM | 15817 | H    | VAL | 1050 | 93.377 | 64.226 | 47.934 | 0.00 | 0.00 |
| ATOM | 15818 | CA   | VAL | 1050 | 93.625 | 62.235 | 47.298 | 0.00 | 0.00 |
| ATOM | 15819 | HA   | VAL | 1050 | 94.332 | 61.773 | 46.610 | 0.00 | 0.00 |
| ATOM | 15820 | CB   | VAL | 1050 | 93.855 | 61.447 | 48.553 | 0.00 | 0.00 |
| ATOM | 15821 | HB   | VAL | 1050 | 93.227 | 61.868 | 49.339 | 0.00 | 0.00 |
| ATOM | 15822 | CG1  | VAL | 1050 | 93.605 | 59.957 | 48.316 | 0.00 | 0.00 |
| ATOM | 15823 | 1HG1 | VAL | 1050 | 93.703 | 59.464 | 49.284 | 0.00 | 0.00 |
| ATOM | 15824 | 2HG1 | VAL | 1050 | 92.620 | 59.743 | 47.902 | 0.00 | 0.00 |
| ATOM | 15825 | 3HG1 | VAL | 1050 | 94.375 | 59.493 | 47.701 | 0.00 | 0.00 |
| ATOM | 15826 | CG2  | VAL | 1050 | 95.361 | 61.540 | 49.003 | 0.00 | 0.00 |
| ATOM | 15827 | 1HG2 | VAL | 1050 | 96.006 | 61.068 | 48.261 | 0.00 | 0.00 |
| ATOM | 15828 | 2HG2 | VAL | 1050 | 95.658 | 62.588 | 49.045 | 0.00 | 0.00 |
| ATOM | 15829 | 3HG2 | VAL | 1050 | 95.614 | 61.030 | 49.932 | 0.00 | 0.00 |
| ATOM | 15830 | C    | VAL | 1050 | 92.218 | 62.195 | 46.735 | 0.00 | 0.00 |

|            |     |     |      |        |        |        |      |      |
|------------|-----|-----|------|--------|--------|--------|------|------|
| ATOM 15831 | O   | VAL | 1050 | 91.233 | 62.561 | 47.410 | 0.00 | 0.00 |
| ATOM 15832 | N   | ASP | 1051 | 92.058 | 61.755 | 45.514 | 0.00 | 0.00 |
| ATOM 15833 | H   | ASP | 1051 | 92.835 | 61.446 | 44.949 | 0.00 | 0.00 |
| ATOM 15834 | CA  | ASP | 1051 | 90.753 | 61.487 | 44.961 | 0.00 | 0.00 |
| ATOM 15835 | HA  | ASP | 1051 | 90.073 | 61.337 | 45.800 | 0.00 | 0.00 |
| ATOM 15836 | CB  | ASP | 1051 | 90.144 | 62.718 | 44.311 | 0.00 | 0.00 |
| ATOM 15837 | HB2 | ASP | 1051 | 90.508 | 62.851 | 43.292 | 0.00 | 0.00 |
| ATOM 15838 | HB3 | ASP | 1051 | 90.382 | 63.628 | 44.862 | 0.00 | 0.00 |
| ATOM 15839 | CG  | ASP | 1051 | 88.552 | 62.745 | 44.162 | 0.00 | 0.00 |
| ATOM 15840 | OD1 | ASP | 1051 | 87.887 | 61.840 | 44.819 | 0.00 | 0.00 |
| ATOM 15841 | OD2 | ASP | 1051 | 88.039 | 63.721 | 43.484 | 0.00 | 0.00 |
| ATOM 15842 | C   | ASP | 1051 | 90.835 | 60.280 | 43.935 | 0.00 | 0.00 |
| ATOM 15843 | O   | ASP | 1051 | 91.881 | 59.753 | 43.680 | 0.00 | 0.00 |
| ATOM 15844 | N   | HIE | 1052 | 89.690 | 59.881 | 43.396 | 0.00 | 0.00 |
| ATOM 15845 | H   | HIE | 1052 | 88.861 | 60.370 | 43.702 | 0.00 | 0.00 |
| ATOM 15846 | CA  | HIE | 1052 | 89.577 | 58.811 | 42.375 | 0.00 | 0.00 |
| ATOM 15847 | HA  | HIE | 1052 | 90.070 | 57.929 | 42.784 | 0.00 | 0.00 |
| ATOM 15848 | CB  | HIE | 1052 | 88.102 | 58.470 | 42.028 | 0.00 | 0.00 |
| ATOM 15849 | HB2 | HIE | 1052 | 88.021 | 57.587 | 41.394 | 0.00 | 0.00 |
| ATOM 15850 | HB3 | HIE | 1052 | 87.584 | 58.346 | 42.979 | 0.00 | 0.00 |
| ATOM 15851 | CG  | HIE | 1052 | 87.586 | 59.498 | 41.119 | 0.00 | 0.00 |
| ATOM 15852 | ND1 | HIE | 1052 | 87.570 | 59.350 | 39.773 | 0.00 | 0.00 |
| ATOM 15853 | CE1 | HIE | 1052 | 87.035 | 60.428 | 39.266 | 0.00 | 0.00 |
| ATOM 15854 | HE1 | HIE | 1052 | 86.810 | 60.714 | 38.250 | 0.00 | 0.00 |
| ATOM 15855 | NE2 | HIE | 1052 | 86.593 | 61.241 | 40.292 | 0.00 | 0.00 |
| ATOM 15856 | HE2 | HIE | 1052 | 86.111 | 62.118 | 40.155 | 0.00 | 0.00 |

|      |       |     |     |      |        |        |        |      |      |
|------|-------|-----|-----|------|--------|--------|--------|------|------|
| ATOM | 15857 | CD2 | HIE | 1052 | 87.028 | 60.666 | 41.438 | 0.00 | 0.00 |
| ATOM | 15858 | HD2 | HIE | 1052 | 87.013 | 60.953 | 42.479 | 0.00 | 0.00 |
| ATOM | 15859 | C   | HIE | 1052 | 90.509 | 59.072 | 41.191 | 0.00 | 0.00 |
| ATOM | 15860 | O   | HIE | 1052 | 91.045 | 58.147 | 40.501 | 0.00 | 0.00 |
| ATOM | 15861 | N   | TRP | 1053 | 90.628 | 60.344 | 40.786 | 0.00 | 0.00 |
| ATOM | 15862 | H   | TRP | 1053 | 90.250 | 61.110 | 41.325 | 0.00 | 0.00 |
| ATOM | 15863 | CA  | TRP | 1053 | 91.293 | 60.806 | 39.527 | 0.00 | 0.00 |
| ATOM | 15864 | HA  | TRP | 1053 | 91.000 | 60.200 | 38.670 | 0.00 | 0.00 |
| ATOM | 15865 | CB  | TRP | 1053 | 90.631 | 62.047 | 39.062 | 0.00 | 0.00 |
| ATOM | 15866 | HB2 | TRP | 1053 | 91.095 | 62.284 | 38.105 | 0.00 | 0.00 |
| ATOM | 15867 | HB3 | TRP | 1053 | 89.584 | 61.880 | 38.809 | 0.00 | 0.00 |
| ATOM | 15868 | CG  | TRP | 1053 | 90.618 | 63.365 | 39.796 | 0.00 | 0.00 |
| ATOM | 15869 | CD1 | TRP | 1053 | 89.647 | 63.746 | 40.638 | 0.00 | 0.00 |
| ATOM | 15870 | HD1 | TRP | 1053 | 88.753 | 63.244 | 40.978 | 0.00 | 0.00 |
| ATOM | 15871 | NE1 | TRP | 1053 | 89.878 | 65.061 | 41.042 | 0.00 | 0.00 |
| ATOM | 15872 | HE1 | TRP | 1053 | 89.187 | 65.584 | 41.561 | 0.00 | 0.00 |
| ATOM | 15873 | CE2 | TRP | 1053 | 91.141 | 65.463 | 40.644 | 0.00 | 0.00 |
| ATOM | 15874 | CZ2 | TRP | 1053 | 91.988 | 66.526 | 40.882 | 0.00 | 0.00 |
| ATOM | 15875 | HZ2 | TRP | 1053 | 91.606 | 67.370 | 41.438 | 0.00 | 0.00 |
| ATOM | 15876 | CH2 | TRP | 1053 | 93.182 | 66.737 | 40.227 | 0.00 | 0.00 |
| ATOM | 15877 | HH2 | TRP | 1053 | 93.764 | 67.622 | 40.436 | 0.00 | 0.00 |
| ATOM | 15878 | CZ3 | TRP | 1053 | 93.617 | 65.798 | 39.296 | 0.00 | 0.00 |
| ATOM | 15879 | HZ3 | TRP | 1053 | 94.491 | 66.024 | 38.703 | 0.00 | 0.00 |
| ATOM | 15880 | CE3 | TRP | 1053 | 92.864 | 64.605 | 39.155 | 0.00 | 0.00 |
| ATOM | 15881 | HE3 | TRP | 1053 | 93.347 | 63.840 | 38.564 | 0.00 | 0.00 |
| ATOM | 15882 | CD2 | TRP | 1053 | 91.560 | 64.442 | 39.789 | 0.00 | 0.00 |

|      |       |      |     |      |        |        |        |      |      |
|------|-------|------|-----|------|--------|--------|--------|------|------|
| ATOM | 15883 | C    | TRP | 1053 | 92.844 | 60.924 | 39.514 | 0.00 | 0.00 |
| ATOM | 15884 | O    | TRP | 1053 | 93.407 | 60.955 | 38.441 | 0.00 | 0.00 |
| ATOM | 15885 | N    | GLY | 1054 | 93.434 | 61.027 | 40.740 | 0.00 | 0.00 |
| ATOM | 15886 | H    | GLY | 1054 | 92.860 | 60.972 | 41.569 | 0.00 | 0.00 |
| ATOM | 15887 | CA   | GLY | 1054 | 94.880 | 61.142 | 40.952 | 0.00 | 0.00 |
| ATOM | 15888 | HA2  | GLY | 1054 | 95.407 | 60.291 | 40.521 | 0.00 | 0.00 |
| ATOM | 15889 | HA3  | GLY | 1054 | 95.319 | 62.025 | 40.487 | 0.00 | 0.00 |
| ATOM | 15890 | C    | GLY | 1054 | 95.272 | 61.262 | 42.432 | 0.00 | 0.00 |
| ATOM | 15891 | O    | GLY | 1054 | 94.490 | 61.709 | 43.304 | 0.00 | 0.00 |
| ATOM | 15892 | N    | ILE | 1055 | 96.600 | 60.972 | 42.654 | 0.00 | 0.00 |
| ATOM | 15893 | H    | ILE | 1055 | 97.138 | 60.584 | 41.893 | 0.00 | 0.00 |
| ATOM | 15894 | CA   | ILE | 1055 | 97.224 | 61.433 | 43.908 | 0.00 | 0.00 |
| ATOM | 15895 | HA   | ILE | 1055 | 96.503 | 61.809 | 44.635 | 0.00 | 0.00 |
| ATOM | 15896 | CB   | ILE | 1055 | 97.925 | 60.227 | 44.579 | 0.00 | 0.00 |
| ATOM | 15897 | HB   | ILE | 1055 | 98.734 | 59.973 | 43.895 | 0.00 | 0.00 |
| ATOM | 15898 | CG2  | ILE | 1055 | 98.513 | 60.645 | 45.888 | 0.00 | 0.00 |
| ATOM | 15899 | 1HG2 | ILE | 1055 | 97.717 | 60.769 | 46.622 | 0.00 | 0.00 |
| ATOM | 15900 | 2HG2 | ILE | 1055 | 99.204 | 59.820 | 46.061 | 0.00 | 0.00 |
| ATOM | 15901 | 3HG2 | ILE | 1055 | 99.020 | 61.608 | 45.826 | 0.00 | 0.00 |
| ATOM | 15902 | CG1  | ILE | 1055 | 97.109 | 58.914 | 44.685 | 0.00 | 0.00 |
| ATOM | 15903 | 2HG1 | ILE | 1055 | 96.861 | 58.597 | 43.672 | 0.00 | 0.00 |
| ATOM | 15904 | 3HG1 | ILE | 1055 | 97.892 | 58.256 | 45.063 | 0.00 | 0.00 |
| ATOM | 15905 | CD1  | ILE | 1055 | 95.957 | 58.931 | 45.693 | 0.00 | 0.00 |
| ATOM | 15906 | 1HD1 | ILE | 1055 | 96.357 | 58.887 | 46.707 | 0.00 | 0.00 |
| ATOM | 15907 | 2HD1 | ILE | 1055 | 95.398 | 59.853 | 45.530 | 0.00 | 0.00 |
| ATOM | 15908 | 3HD1 | ILE | 1055 | 95.374 | 58.049 | 45.430 | 0.00 | 0.00 |

|      |       |      |     |      |         |        |        |      |      |
|------|-------|------|-----|------|---------|--------|--------|------|------|
| ATOM | 15909 | C    | ILE | 1055 | 98.330  | 62.561 | 43.640 | 0.00 | 0.00 |
| ATOM | 15910 | O    | ILE | 1055 | 99.463  | 62.260 | 43.257 | 0.00 | 0.00 |
| ATOM | 15911 | N    | VAL | 1056 | 97.993  | 63.825 | 43.824 | 0.00 | 0.00 |
| ATOM | 15912 | H    | VAL | 1056 | 97.118  | 63.972 | 44.306 | 0.00 | 0.00 |
| ATOM | 15913 | CA   | VAL | 1056 | 98.624  | 65.018 | 43.106 | 0.00 | 0.00 |
| ATOM | 15914 | HA   | VAL | 1056 | 99.591  | 64.605 | 42.819 | 0.00 | 0.00 |
| ATOM | 15915 | CB   | VAL | 1056 | 97.977  | 65.352 | 41.745 | 0.00 | 0.00 |
| ATOM | 15916 | HB   | VAL | 1056 | 98.602  | 66.073 | 41.217 | 0.00 | 0.00 |
| ATOM | 15917 | CG1  | VAL | 1056 | 97.851  | 64.055 | 40.876 | 0.00 | 0.00 |
| ATOM | 15918 | 1HG1 | VAL | 1056 | 97.546  | 64.375 | 39.880 | 0.00 | 0.00 |
| ATOM | 15919 | 2HG1 | VAL | 1056 | 98.806  | 63.540 | 40.978 | 0.00 | 0.00 |
| ATOM | 15920 | 3HG1 | VAL | 1056 | 97.062  | 63.422 | 41.283 | 0.00 | 0.00 |
| ATOM | 15921 | CG2  | VAL | 1056 | 96.610  | 65.934 | 42.002 | 0.00 | 0.00 |
| ATOM | 15922 | 1HG2 | VAL | 1056 | 96.692  | 66.827 | 42.622 | 0.00 | 0.00 |
| ATOM | 15923 | 2HG2 | VAL | 1056 | 96.174  | 66.174 | 41.033 | 0.00 | 0.00 |
| ATOM | 15924 | 3HG2 | VAL | 1056 | 95.869  | 65.224 | 42.370 | 0.00 | 0.00 |
| ATOM | 15925 | C    | VAL | 1056 | 98.878  | 66.278 | 43.938 | 0.00 | 0.00 |
| ATOM | 15926 | O    | VAL | 1056 | 98.324  | 66.399 | 45.020 | 0.00 | 0.00 |
| ATOM | 15927 | N    | LYS | 1057 | 99.732  | 67.210 | 43.496 | 0.00 | 0.00 |
| ATOM | 15928 | H    | LYS | 1057 | 100.184 | 67.027 | 42.612 | 0.00 | 0.00 |
| ATOM | 15929 | CA   | LYS | 1057 | 99.896  | 68.551 | 44.080 | 0.00 | 0.00 |
| ATOM | 15930 | HA   | LYS | 1057 | 99.354  | 68.702 | 45.014 | 0.00 | 0.00 |
| ATOM | 15931 | CB   | LYS | 1057 | 101.404 | 68.820 | 44.310 | 0.00 | 0.00 |
| ATOM | 15932 | HB2  | LYS | 1057 | 101.986 | 68.656 | 43.403 | 0.00 | 0.00 |
| ATOM | 15933 | HB3  | LYS | 1057 | 101.670 | 69.852 | 44.536 | 0.00 | 0.00 |
| ATOM | 15934 | CG   | LYS | 1057 | 101.965 | 67.940 | 45.472 | 0.00 | 0.00 |



|      |       |     |     |      |         |        |        |      |      |
|------|-------|-----|-----|------|---------|--------|--------|------|------|
| ATOM | 15935 | HG2 | LYS | 1057 | 101.511 | 66.957 | 45.348 | 0.00 | 0.00 |
| ATOM | 15936 | HG3 | LYS | 1057 | 102.978 | 67.761 | 45.110 | 0.00 | 0.00 |
| ATOM | 15937 | CD  | LYS | 1057 | 101.915 | 68.421 | 46.897 | 0.00 | 0.00 |
| ATOM | 15938 | HD2 | LYS | 1057 | 100.884 | 68.372 | 47.250 | 0.00 | 0.00 |
| ATOM | 15939 | HD3 | LYS | 1057 | 102.549 | 67.675 | 47.375 | 0.00 | 0.00 |
| ATOM | 15940 | CE  | LYS | 1057 | 102.481 | 69.872 | 47.092 | 0.00 | 0.00 |
| ATOM | 15941 | HE2 | LYS | 1057 | 103.035 | 69.842 | 48.030 | 0.00 | 0.00 |
| ATOM | 15942 | HE3 | LYS | 1057 | 103.184 | 70.104 | 46.292 | 0.00 | 0.00 |
| ATOM | 15943 | NZ  | LYS | 1057 | 101.422 | 70.874 | 47.309 | 0.00 | 0.00 |
| ATOM | 15944 | HZ1 | LYS | 1057 | 101.935 | 71.542 | 47.868 | 0.00 | 0.00 |
| ATOM | 15945 | HZ2 | LYS | 1057 | 101.166 | 71.345 | 46.453 | 0.00 | 0.00 |
| ATOM | 15946 | HZ3 | LYS | 1057 | 100.571 | 70.620 | 47.791 | 0.00 | 0.00 |
| ATOM | 15947 | C   | LYS | 1057 | 99.404  | 69.593 | 43.048 | 0.00 | 0.00 |
| ATOM | 15948 | O   | LYS | 1057 | 99.674  | 69.756 | 41.844 | 0.00 | 0.00 |
| ATOM | 15949 | N   | ALA | 1058 | 98.531  | 70.404 | 43.497 | 0.00 | 0.00 |
| ATOM | 15950 | H   | ALA | 1058 | 98.397  | 70.421 | 44.498 | 0.00 | 0.00 |
| ATOM | 15951 | CA  | ALA | 1058 | 97.869  | 71.558 | 42.870 | 0.00 | 0.00 |
| ATOM | 15952 | HA  | ALA | 1058 | 98.643  | 72.069 | 42.298 | 0.00 | 0.00 |
| ATOM | 15953 | CB  | ALA | 1058 | 96.798  | 70.998 | 41.922 | 0.00 | 0.00 |
| ATOM | 15954 | HB1 | ALA | 1058 | 96.231  | 70.215 | 42.426 | 0.00 | 0.00 |
| ATOM | 15955 | HB2 | ALA | 1058 | 96.208  | 71.805 | 41.487 | 0.00 | 0.00 |
| ATOM | 15956 | HB3 | ALA | 1058 | 97.217  | 70.490 | 41.054 | 0.00 | 0.00 |
| ATOM | 15957 | C   | ALA | 1058 | 97.165  | 72.489 | 43.887 | 0.00 | 0.00 |
| ATOM | 15958 | O   | ALA | 1058 | 97.076  | 72.129 | 45.055 | 0.00 | 0.00 |
| ATOM | 15959 | N   | ASP | 1059 | 96.712  | 73.642 | 43.399 | 0.00 | 0.00 |
| ATOM | 15960 | H   | ASP | 1059 | 96.786  | 73.633 | 42.392 | 0.00 | 0.00 |

|      |       |      |     |      |        |        |        |      |      |
|------|-------|------|-----|------|--------|--------|--------|------|------|
| ATOM | 15961 | CA   | ASP | 1059 | 95.836 | 74.514 | 44.136 | 0.00 | 0.00 |
| ATOM | 15962 | HA   | ASP | 1059 | 95.964 | 74.396 | 45.212 | 0.00 | 0.00 |
| ATOM | 15963 | CB   | ASP | 1059 | 96.278 | 76.013 | 43.871 | 0.00 | 0.00 |
| ATOM | 15964 | HB2  | ASP | 1059 | 96.218 | 76.375 | 42.845 | 0.00 | 0.00 |
| ATOM | 15965 | HB3  | ASP | 1059 | 95.657 | 76.706 | 44.440 | 0.00 | 0.00 |
| ATOM | 15966 | CG   | ASP | 1059 | 97.683 | 76.464 | 44.351 | 0.00 | 0.00 |
| ATOM | 15967 | OD1  | ASP | 1059 | 98.049 | 75.908 | 45.423 | 0.00 | 0.00 |
| ATOM | 15968 | OD2  | ASP | 1059 | 98.473 | 77.061 | 43.598 | 0.00 | 0.00 |
| ATOM | 15969 | C    | ASP | 1059 | 94.383 | 74.283 | 43.773 | 0.00 | 0.00 |
| ATOM | 15970 | O    | ASP | 1059 | 94.130 | 73.844 | 42.599 | 0.00 | 0.00 |
| ATOM | 15971 | N    | ILE | 1060 | 93.381 | 74.502 | 44.603 | 0.00 | 0.00 |
| ATOM | 15972 | H    | ILE | 1060 | 93.677 | 74.895 | 45.484 | 0.00 | 0.00 |
| ATOM | 15973 | CA   | ILE | 1060 | 91.908 | 74.494 | 44.194 | 0.00 | 0.00 |
| ATOM | 15974 | HA   | ILE | 1060 | 91.879 | 74.269 | 43.128 | 0.00 | 0.00 |
| ATOM | 15975 | CB   | ILE | 1060 | 91.003 | 73.407 | 44.883 | 0.00 | 0.00 |
| ATOM | 15976 | HB   | ILE | 1060 | 90.870 | 73.726 | 45.916 | 0.00 | 0.00 |
| ATOM | 15977 | CG2  | ILE | 1060 | 89.513 | 73.384 | 44.281 | 0.00 | 0.00 |
| ATOM | 15978 | 1HG2 | ILE | 1060 | 88.928 | 72.593 | 44.750 | 0.00 | 0.00 |
| ATOM | 15979 | 2HG2 | ILE | 1060 | 88.941 | 74.278 | 44.530 | 0.00 | 0.00 |
| ATOM | 15980 | 3HG2 | ILE | 1060 | 89.554 | 73.207 | 43.206 | 0.00 | 0.00 |
| ATOM | 15981 | CG1  | ILE | 1060 | 91.633 | 72.005 | 44.708 | 0.00 | 0.00 |
| ATOM | 15982 | 2HG1 | ILE | 1060 | 90.820 | 71.366 | 44.361 | 0.00 | 0.00 |
| ATOM | 15983 | 3HG1 | ILE | 1060 | 92.332 | 71.894 | 43.879 | 0.00 | 0.00 |
| ATOM | 15984 | CD1  | ILE | 1060 | 92.230 | 71.322 | 45.973 | 0.00 | 0.00 |
| ATOM | 15985 | 1HD1 | ILE | 1060 | 92.643 | 70.350 | 45.705 | 0.00 | 0.00 |
| ATOM | 15986 | 2HD1 | ILE | 1060 | 93.051 | 71.882 | 46.422 | 0.00 | 0.00 |

ATOM 15987 3HD1 ILE 1060 91.418 71.224 46.695 0.00 0.00  
ATOM 15988 C ILE 1060 91.250 75.850 44.358 0.00 0.00  
ATOM 15989 O ILE 1060 91.256 76.464 45.410 0.00 0.00  
ATOM 15990 N GLY 1061 90.625 76.337 43.347 0.00 0.00  
ATOM 15991 H GLY 1061 90.506 75.746 42.537 0.00 0.00  
ATOM 15992 CA GLY 1061 89.769 77.530 43.430 0.00 0.00  
ATOM 15993 HA2 GLY 1061 90.066 78.251 44.192 0.00 0.00  
ATOM 15994 HA3 GLY 1061 89.896 78.046 42.479 0.00 0.00  
ATOM 15995 C GLY 1061 88.272 77.205 43.580 0.00 0.00  
ATOM 15996 O GLY 1061 87.804 76.223 43.013 0.00 0.00  
ATOM 15997 N VAL 1062 87.581 78.082 44.304 0.00 0.00  
ATOM 15998 H VAL 1062 88.081 78.732 44.892 0.00 0.00  
ATOM 15999 CA VAL 1062 86.140 78.074 44.531 0.00 0.00  
ATOM 16000 HA VAL 1062 85.748 77.363 43.804 0.00 0.00  
ATOM 16001 CB VAL 1062 85.911 77.697 46.001 0.00 0.00  
ATOM 16002 HB VAL 1062 86.329 78.513 46.591 0.00 0.00  
ATOM 16003 CG1 VAL 1062 84.413 77.625 46.254 0.00 0.00  
ATOM 16004 1HG1 VAL 1062 84.269 77.612 47.334 0.00 0.00  
ATOM 16005 2HG1 VAL 1062 83.937 78.548 45.924 0.00 0.00  
ATOM 16006 3HG1 VAL 1062 83.889 76.773 45.821 0.00 0.00  
ATOM 16007 CG2 VAL 1062 86.543 76.250 46.370 0.00 0.00  
ATOM 16008 1HG2 VAL 1062 86.116 75.566 45.637 0.00 0.00  
ATOM 16009 2HG2 VAL 1062 87.630 76.184 46.343 0.00 0.00  
ATOM 16010 3HG2 VAL 1062 86.136 75.838 47.294 0.00 0.00  
ATOM 16011 C VAL 1062 85.443 79.413 44.241 0.00 0.00  
ATOM 16012 O VAL 1062 85.855 80.501 44.764 0.00 0.00

|            |     |          |        |        |        |      |      |
|------------|-----|----------|--------|--------|--------|------|------|
| ATOM 16013 | N   | LYS 1063 | 84.299 | 79.462 | 43.444 | 0.00 | 0.00 |
| ATOM 16014 | H   | LYS 1063 | 83.999 | 78.582 | 43.048 | 0.00 | 0.00 |
| ATOM 16015 | CA  | LYS 1063 | 83.533 | 80.606 | 43.088 | 0.00 | 0.00 |
| ATOM 16016 | HA  | LYS 1063 | 83.836 | 81.417 | 43.750 | 0.00 | 0.00 |
| ATOM 16017 | CB  | LYS 1063 | 83.912 | 81.044 | 41.665 | 0.00 | 0.00 |
| ATOM 16018 | HB2 | LYS 1063 | 84.988 | 81.213 | 41.689 | 0.00 | 0.00 |
| ATOM 16019 | HB3 | LYS 1063 | 83.630 | 80.263 | 40.960 | 0.00 | 0.00 |
| ATOM 16020 | CG  | LYS 1063 | 83.267 | 82.344 | 41.398 | 0.00 | 0.00 |
| ATOM 16021 | HG2 | LYS 1063 | 83.016 | 82.421 | 40.340 | 0.00 | 0.00 |
| ATOM 16022 | HG3 | LYS 1063 | 82.246 | 82.396 | 41.776 | 0.00 | 0.00 |
| ATOM 16023 | CD  | LYS 1063 | 84.081 | 83.593 | 41.819 | 0.00 | 0.00 |
| ATOM 16024 | HD2 | LYS 1063 | 84.266 | 83.582 | 42.893 | 0.00 | 0.00 |
| ATOM 16025 | HD3 | LYS 1063 | 85.021 | 83.462 | 41.284 | 0.00 | 0.00 |
| ATOM 16026 | CE  | LYS 1063 | 83.441 | 84.916 | 41.635 | 0.00 | 0.00 |
| ATOM 16027 | HE2 | LYS 1063 | 83.398 | 85.097 | 40.561 | 0.00 | 0.00 |
| ATOM 16028 | HE3 | LYS 1063 | 82.420 | 84.921 | 42.015 | 0.00 | 0.00 |
| ATOM 16029 | NZ  | LYS 1063 | 84.285 | 85.952 | 42.362 | 0.00 | 0.00 |
| ATOM 16030 | HZ1 | LYS 1063 | 84.267 | 85.806 | 43.361 | 0.00 | 0.00 |
| ATOM 16031 | HZ2 | LYS 1063 | 85.247 | 85.797 | 42.096 | 0.00 | 0.00 |
| ATOM 16032 | HZ3 | LYS 1063 | 84.076 | 86.911 | 42.124 | 0.00 | 0.00 |
| ATOM 16033 | C   | LYS 1063 | 81.954 | 80.297 | 43.291 | 0.00 | 0.00 |
| ATOM 16034 | O   | LYS 1063 | 81.501 | 79.197 | 42.810 | 0.00 | 0.00 |
| ATOM 16035 | N   | ASP 1064 | 81.161 | 81.172 | 43.863 | 0.00 | 0.00 |
| ATOM 16036 | H   | ASP 1064 | 81.608 | 81.901 | 44.401 | 0.00 | 0.00 |
| ATOM 16037 | CA  | ASP 1064 | 79.727 | 80.957 | 43.938 | 0.00 | 0.00 |
| ATOM 16038 | HA  | ASP 1064 | 79.312 | 81.724 | 44.593 | 0.00 | 0.00 |

|      |       |     |     |      |        |        |        |      |      |
|------|-------|-----|-----|------|--------|--------|--------|------|------|
| ATOM | 16039 | CB  | ASP | 1064 | 79.019 | 81.187 | 42.550 | 0.00 | 0.00 |
| ATOM | 16040 | HB2 | ASP | 1064 | 79.503 | 82.022 | 42.043 | 0.00 | 0.00 |
| ATOM | 16041 | HB3 | ASP | 1064 | 79.139 | 80.243 | 42.018 | 0.00 | 0.00 |
| ATOM | 16042 | CG  | ASP | 1064 | 77.476 | 81.518 | 42.853 | 0.00 | 0.00 |
| ATOM | 16043 | OD1 | ASP | 1064 | 77.164 | 82.311 | 43.763 | 0.00 | 0.00 |
| ATOM | 16044 | OD2 | ASP | 1064 | 76.660 | 80.977 | 42.099 | 0.00 | 0.00 |
| ATOM | 16045 | C   | ASP | 1064 | 79.323 | 79.661 | 44.681 | 0.00 | 0.00 |
| ATOM | 16046 | O   | ASP | 1064 | 78.291 | 78.999 | 44.454 | 0.00 | 0.00 |
| ATOM | 16047 | N   | GLY | 1065 | 80.239 | 79.252 | 45.620 | 0.00 | 0.00 |
| ATOM | 16048 | H   | GLY | 1065 | 81.039 | 79.789 | 45.925 | 0.00 | 0.00 |
| ATOM | 16049 | CA  | GLY | 1065 | 80.146 | 78.034 | 46.483 | 0.00 | 0.00 |
| ATOM | 16050 | HA2 | GLY | 1065 | 80.961 | 78.034 | 47.207 | 0.00 | 0.00 |
| ATOM | 16051 | HA3 | GLY | 1065 | 79.123 | 77.998 | 46.855 | 0.00 | 0.00 |
| ATOM | 16052 | C   | GLY | 1065 | 80.387 | 76.718 | 45.750 | 0.00 | 0.00 |
| ATOM | 16053 | O   | GLY | 1065 | 80.338 | 75.670 | 46.319 | 0.00 | 0.00 |
| ATOM | 16054 | N   | ARG | 1066 | 80.965 | 76.786 | 44.578 | 0.00 | 0.00 |
| ATOM | 16055 | H   | ARG | 1066 | 81.252 | 77.654 | 44.149 | 0.00 | 0.00 |
| ATOM | 16056 | CA  | ARG | 1066 | 81.354 | 75.586 | 43.787 | 0.00 | 0.00 |
| ATOM | 16057 | HA  | ARG | 1066 | 81.100 | 74.668 | 44.316 | 0.00 | 0.00 |
| ATOM | 16058 | CB  | ARG | 1066 | 80.457 | 75.614 | 42.512 | 0.00 | 0.00 |
| ATOM | 16059 | HB2 | ARG | 1066 | 80.534 | 76.563 | 41.981 | 0.00 | 0.00 |
| ATOM | 16060 | HB3 | ARG | 1066 | 80.780 | 74.796 | 41.867 | 0.00 | 0.00 |
| ATOM | 16061 | CG  | ARG | 1066 | 78.957 | 75.352 | 42.830 | 0.00 | 0.00 |
| ATOM | 16062 | HG2 | ARG | 1066 | 78.778 | 74.346 | 43.207 | 0.00 | 0.00 |
| ATOM | 16063 | HG3 | ARG | 1066 | 78.654 | 76.096 | 43.568 | 0.00 | 0.00 |
| ATOM | 16064 | CD  | ARG | 1066 | 78.066 | 75.586 | 41.627 | 0.00 | 0.00 |

|      |       |      |     |      |        |        |        |      |      |
|------|-------|------|-----|------|--------|--------|--------|------|------|
| ATOM | 16065 | HD2  | ARG | 1066 | 78.059 | 76.640 | 41.351 | 0.00 | 0.00 |
| ATOM | 16066 | HD3  | ARG | 1066 | 78.524 | 75.051 | 40.795 | 0.00 | 0.00 |
| ATOM | 16067 | NE   | ARG | 1066 | 76.684 | 75.250 | 41.935 | 0.00 | 0.00 |
| ATOM | 16068 | HE   | ARG | 1066 | 76.271 | 75.958 | 42.526 | 0.00 | 0.00 |
| ATOM | 16069 | CZ   | ARG | 1066 | 76.154 | 73.974 | 41.896 | 0.00 | 0.00 |
| ATOM | 16070 | NH1  | ARG | 1066 | 75.184 | 73.614 | 42.683 | 0.00 | 0.00 |
| ATOM | 16071 | 1HH1 | ARG | 1066 | 74.727 | 72.741 | 42.462 | 0.00 | 0.00 |
| ATOM | 16072 | 2HH1 | ARG | 1066 | 74.544 | 74.304 | 43.051 | 0.00 | 0.00 |
| ATOM | 16073 | NH2  | ARG | 1066 | 76.596 | 73.031 | 41.122 | 0.00 | 0.00 |
| ATOM | 16074 | 1HH2 | ARG | 1066 | 76.297 | 72.083 | 41.299 | 0.00 | 0.00 |
| ATOM | 16075 | 2HH2 | ARG | 1066 | 77.325 | 73.126 | 40.430 | 0.00 | 0.00 |
| ATOM | 16076 | C    | ARG | 1066 | 82.808 | 75.474 | 43.346 | 0.00 | 0.00 |
| ATOM | 16077 | O    | ARG | 1066 | 83.526 | 76.493 | 43.349 | 0.00 | 0.00 |
| ATOM | 16078 | N    | ILE | 1067 | 83.309 | 74.290 | 42.976 | 0.00 | 0.00 |
| ATOM | 16079 | H    | ILE | 1067 | 82.661 | 73.517 | 42.918 | 0.00 | 0.00 |
| ATOM | 16080 | CA   | ILE | 1067 | 84.690 | 74.014 | 42.532 | 0.00 | 0.00 |
| ATOM | 16081 | HA   | ILE | 1067 | 85.417 | 74.404 | 43.244 | 0.00 | 0.00 |
| ATOM | 16082 | CB   | ILE | 1067 | 84.974 | 72.466 | 42.392 | 0.00 | 0.00 |
| ATOM | 16083 | HB   | ILE | 1067 | 84.389 | 72.117 | 41.541 | 0.00 | 0.00 |
| ATOM | 16084 | CG2  | ILE | 1067 | 86.500 | 72.239 | 42.023 | 0.00 | 0.00 |
| ATOM | 16085 | 1HG2 | ILE | 1067 | 86.670 | 72.599 | 41.008 | 0.00 | 0.00 |
| ATOM | 16086 | 2HG2 | ILE | 1067 | 87.152 | 72.580 | 42.828 | 0.00 | 0.00 |
| ATOM | 16087 | 3HG2 | ILE | 1067 | 86.782 | 71.192 | 41.912 | 0.00 | 0.00 |
| ATOM | 16088 | CG1  | ILE | 1067 | 84.643 | 71.722 | 43.723 | 0.00 | 0.00 |
| ATOM | 16089 | 2HG1 | ILE | 1067 | 85.071 | 72.286 | 44.552 | 0.00 | 0.00 |
| ATOM | 16090 | 3HG1 | ILE | 1067 | 83.581 | 71.754 | 43.966 | 0.00 | 0.00 |

|            |      |     |      |        |        |        |      |      |
|------------|------|-----|------|--------|--------|--------|------|------|
| ATOM 16091 | CD1  | ILE | 1067 | 85.120 | 70.275 | 43.947 | 0.00 | 0.00 |
| ATOM 16092 | 1HD1 | ILE | 1067 | 84.743 | 69.579 | 43.197 | 0.00 | 0.00 |
| ATOM 16093 | 2HD1 | ILE | 1067 | 86.204 | 70.189 | 43.869 | 0.00 | 0.00 |
| ATOM 16094 | 3HD1 | ILE | 1067 | 84.894 | 69.874 | 44.935 | 0.00 | 0.00 |
| ATOM 16095 | C    | ILE | 1067 | 84.902 | 74.630 | 41.207 | 0.00 | 0.00 |
| ATOM 16096 | O    | ILE | 1067 | 84.241 | 74.327 | 40.261 | 0.00 | 0.00 |
| ATOM 16097 | N    | PHE | 1068 | 85.685 | 75.675 | 41.176 | 0.00 | 0.00 |
| ATOM 16098 | H    | PHE | 1068 | 86.265 | 75.732 | 42.001 | 0.00 | 0.00 |
| ATOM 16099 | CA   | PHE | 1068 | 85.871 | 76.566 | 40.013 | 0.00 | 0.00 |
| ATOM 16100 | HA   | PHE | 1068 | 84.983 | 76.530 | 39.382 | 0.00 | 0.00 |
| ATOM 16101 | CB   | PHE | 1068 | 86.136 | 77.938 | 40.569 | 0.00 | 0.00 |
| ATOM 16102 | HB2  | PHE | 1068 | 85.308 | 78.498 | 41.005 | 0.00 | 0.00 |
| ATOM 16103 | HB3  | PHE | 1068 | 86.862 | 77.963 | 41.381 | 0.00 | 0.00 |
| ATOM 16104 | CG   | PHE | 1068 | 86.698 | 78.855 | 39.587 | 0.00 | 0.00 |
| ATOM 16105 | CD1  | PHE | 1068 | 85.897 | 79.535 | 38.759 | 0.00 | 0.00 |
| ATOM 16106 | HD1  | PHE | 1068 | 84.823 | 79.454 | 38.839 | 0.00 | 0.00 |
| ATOM 16107 | CE1  | PHE | 1068 | 86.382 | 80.578 | 37.901 | 0.00 | 0.00 |
| ATOM 16108 | HE1  | PHE | 1068 | 85.668 | 81.093 | 37.275 | 0.00 | 0.00 |
| ATOM 16109 | CZ   | PHE | 1068 | 87.796 | 80.806 | 37.786 | 0.00 | 0.00 |
| ATOM 16110 | HZ   | PHE | 1068 | 88.083 | 81.682 | 37.224 | 0.00 | 0.00 |
| ATOM 16111 | CE2  | PHE | 1068 | 88.614 | 80.055 | 38.575 | 0.00 | 0.00 |
| ATOM 16112 | HE2  | PHE | 1068 | 89.692 | 80.104 | 38.557 | 0.00 | 0.00 |
| ATOM 16113 | CD2  | PHE | 1068 | 88.135 | 79.078 | 39.482 | 0.00 | 0.00 |
| ATOM 16114 | HD2  | PHE | 1068 | 88.839 | 78.562 | 40.118 | 0.00 | 0.00 |
| ATOM 16115 | C    | PHE | 1068 | 86.989 | 76.219 | 38.975 | 0.00 | 0.00 |
| ATOM 16116 | O    | PHE | 1068 | 86.691 | 76.165 | 37.766 | 0.00 | 0.00 |

|      |       |      |     |      |        |        |        |      |      |
|------|-------|------|-----|------|--------|--------|--------|------|------|
| ATOM | 16117 | N    | ALA | 1069 | 88.134 | 75.798 | 39.526 | 0.00 | 0.00 |
| ATOM | 16118 | H    | ALA | 1069 | 88.223 | 75.929 | 40.523 | 0.00 | 0.00 |
| ATOM | 16119 | CA   | ALA | 1069 | 89.191 | 75.067 | 38.802 | 0.00 | 0.00 |
| ATOM | 16120 | HA   | ALA | 1069 | 88.675 | 74.312 | 38.208 | 0.00 | 0.00 |
| ATOM | 16121 | CB   | ALA | 1069 | 89.988 | 75.979 | 37.897 | 0.00 | 0.00 |
| ATOM | 16122 | HB1  | ALA | 1069 | 90.695 | 76.612 | 38.433 | 0.00 | 0.00 |
| ATOM | 16123 | HB2  | ALA | 1069 | 90.624 | 75.367 | 37.257 | 0.00 | 0.00 |
| ATOM | 16124 | HB3  | ALA | 1069 | 89.362 | 76.642 | 37.300 | 0.00 | 0.00 |
| ATOM | 16125 | C    | ALA | 1069 | 90.121 | 74.417 | 39.790 | 0.00 | 0.00 |
| ATOM | 16126 | O    | ALA | 1069 | 90.149 | 74.653 | 40.988 | 0.00 | 0.00 |
| ATOM | 16127 | N    | ILE | 1070 | 90.959 | 73.536 | 39.202 | 0.00 | 0.00 |
| ATOM | 16128 | H    | ILE | 1070 | 90.707 | 73.257 | 38.265 | 0.00 | 0.00 |
| ATOM | 16129 | CA   | ILE | 1070 | 92.122 | 72.977 | 39.887 | 0.00 | 0.00 |
| ATOM | 16130 | HA   | ILE | 1070 | 92.239 | 73.416 | 40.878 | 0.00 | 0.00 |
| ATOM | 16131 | CB   | ILE | 1070 | 91.966 | 71.398 | 40.123 | 0.00 | 0.00 |
| ATOM | 16132 | HB   | ILE | 1070 | 91.752 | 70.857 | 39.201 | 0.00 | 0.00 |
| ATOM | 16133 | CG2  | ILE | 1070 | 93.128 | 70.853 | 40.972 | 0.00 | 0.00 |
| ATOM | 16134 | 1HG2 | ILE | 1070 | 93.584 | 71.611 | 41.607 | 0.00 | 0.00 |
| ATOM | 16135 | 2HG2 | ILE | 1070 | 92.994 | 69.927 | 41.532 | 0.00 | 0.00 |
| ATOM | 16136 | 3HG2 | ILE | 1070 | 93.891 | 70.721 | 40.205 | 0.00 | 0.00 |
| ATOM | 16137 | CG1  | ILE | 1070 | 90.717 | 71.079 | 40.950 | 0.00 | 0.00 |
| ATOM | 16138 | 2HG1 | ILE | 1070 | 90.781 | 70.080 | 41.382 | 0.00 | 0.00 |
| ATOM | 16139 | 3HG1 | ILE | 1070 | 90.698 | 71.838 | 41.732 | 0.00 | 0.00 |
| ATOM | 16140 | CD1  | ILE | 1070 | 89.395 | 71.145 | 40.161 | 0.00 | 0.00 |
| ATOM | 16141 | 1HD1 | ILE | 1070 | 88.826 | 70.306 | 40.564 | 0.00 | 0.00 |
| ATOM | 16142 | 2HD1 | ILE | 1070 | 88.946 | 72.131 | 40.045 | 0.00 | 0.00 |



ATOM 16143 3HD1 ILE 1070 89.666 70.867 39.143 0.00 0.00  
ATOM 16144 C ILE 1070 93.329 73.224 38.979 0.00 0.00  
ATOM 16145 O ILE 1070 93.290 72.998 37.740 0.00 0.00  
ATOM 16146 N GLY 1071 94.417 73.706 39.552 0.00 0.00  
ATOM 16147 H GLY 1071 94.429 73.924 40.538 0.00 0.00  
ATOM 16148 CA GLY 1071 95.573 73.949 38.760 0.00 0.00  
ATOM 16149 HA2 GLY 1071 95.923 73.037 38.276 0.00 0.00  
ATOM 16150 HA3 GLY 1071 95.302 74.676 37.994 0.00 0.00  
ATOM 16151 C GLY 1071 96.650 74.631 39.652 0.00 0.00  
ATOM 16152 O GLY 1071 97.080 74.040 40.697 0.00 0.00  
ATOM 16153 N LYS 1072 97.101 75.766 39.202 0.00 0.00  
ATOM 16154 H LYS 1072 96.758 75.955 38.271 0.00 0.00  
ATOM 16155 CA LYS 1072 97.992 76.673 39.900 0.00 0.00  
ATOM 16156 HA LYS 1072 98.341 76.194 40.816 0.00 0.00  
ATOM 16157 CB LYS 1072 99.242 76.932 38.931 0.00 0.00  
ATOM 16158 HB2 LYS 1072 99.418 76.095 38.255 0.00 0.00  
ATOM 16159 HB3 LYS 1072 98.993 77.802 38.322 0.00 0.00  
ATOM 16160 CG LYS 1072 100.479 77.168 39.794 0.00 0.00  
ATOM 16161 HG2 LYS 1072 100.298 77.879 40.600 0.00 0.00  
ATOM 16162 HG3 LYS 1072 100.643 76.177 40.219 0.00 0.00  
ATOM 16163 CD LYS 1072 101.730 77.621 39.052 0.00 0.00  
ATOM 16164 HD2 LYS 1072 101.971 76.950 38.228 0.00 0.00  
ATOM 16165 HD3 LYS 1072 101.643 78.649 38.700 0.00 0.00  
ATOM 16166 CE LYS 1072 102.868 77.451 39.970 0.00 0.00  
ATOM 16167 HE2 LYS 1072 102.921 76.391 40.219 0.00 0.00  
ATOM 16168 HE3 LYS 1072 103.727 77.569 39.309 0.00 0.00

|      |       |     |     |      |         |        |        |      |      |
|------|-------|-----|-----|------|---------|--------|--------|------|------|
| ATOM | 16169 | NZ  | LYS | 1072 | 102.915 | 78.273 | 41.163 | 0.00 | 0.00 |
| ATOM | 16170 | HZ1 | LYS | 1072 | 103.575 | 77.935 | 41.848 | 0.00 | 0.00 |
| ATOM | 16171 | HZ2 | LYS | 1072 | 103.056 | 79.270 | 41.084 | 0.00 | 0.00 |
| ATOM | 16172 | HZ3 | LYS | 1072 | 102.034 | 78.158 | 41.644 | 0.00 | 0.00 |
| ATOM | 16173 | C   | LYS | 1072 | 97.268  | 78.016 | 40.220 | 0.00 | 0.00 |
| ATOM | 16174 | O   | LYS | 1072 | 96.585  | 78.607 | 39.393 | 0.00 | 0.00 |
| ATOM | 16175 | N   | ALA | 1073 | 97.417  | 78.533 | 41.422 | 0.00 | 0.00 |
| ATOM | 16176 | H   | ALA | 1073 | 98.090  | 78.076 | 42.019 | 0.00 | 0.00 |
| ATOM | 16177 | CA  | ALA | 1073 | 97.039  | 79.852 | 41.834 | 0.00 | 0.00 |
| ATOM | 16178 | HA  | ALA | 1073 | 96.117  | 80.184 | 41.357 | 0.00 | 0.00 |
| ATOM | 16179 | CB  | ALA | 1073 | 96.554  | 79.798 | 43.320 | 0.00 | 0.00 |
| ATOM | 16180 | HB1 | ALA | 1073 | 95.718  | 79.101 | 43.279 | 0.00 | 0.00 |
| ATOM | 16181 | HB2 | ALA | 1073 | 97.367  | 79.341 | 43.884 | 0.00 | 0.00 |
| ATOM | 16182 | HB3 | ALA | 1073 | 96.137  | 80.693 | 43.783 | 0.00 | 0.00 |
| ATOM | 16183 | C   | ALA | 1073 | 98.153  | 80.887 | 41.506 | 0.00 | 0.00 |
| ATOM | 16184 | O   | ALA | 1073 | 99.296  | 80.546 | 41.092 | 0.00 | 0.00 |
| ATOM | 16185 | N   | GLY | 1074 | 97.733  | 82.172 | 41.704 | 0.00 | 0.00 |
| ATOM | 16186 | H   | GLY | 1074 | 96.783  | 82.403 | 41.957 | 0.00 | 0.00 |
| ATOM | 16187 | CA  | GLY | 1074 | 98.620  | 83.409 | 41.683 | 0.00 | 0.00 |
| ATOM | 16188 | HA2 | GLY | 1074 | 98.787  | 83.544 | 42.752 | 0.00 | 0.00 |
| ATOM | 16189 | HA3 | GLY | 1074 | 99.618  | 83.303 | 41.259 | 0.00 | 0.00 |
| ATOM | 16190 | C   | GLY | 1074 | 97.926  | 84.686 | 41.129 | 0.00 | 0.00 |
| ATOM | 16191 | O   | GLY | 1074 | 96.739  | 84.666 | 40.812 | 0.00 | 0.00 |
| ATOM | 16192 | N   | ASN | 1075 | 98.739  | 85.718 | 40.916 | 0.00 | 0.00 |
| ATOM | 16193 | H   | ASN | 1075 | 99.716  | 85.549 | 41.105 | 0.00 | 0.00 |
| ATOM | 16194 | CA  | ASN | 1075 | 98.503  | 86.817 | 39.930 | 0.00 | 0.00 |

|            |      |          |         |        |        |      |      |
|------------|------|----------|---------|--------|--------|------|------|
| ATOM 16195 | HA   | ASN 1075 | 97.418  | 86.927 | 39.942 | 0.00 | 0.00 |
| ATOM 16196 | CB   | ASN 1075 | 99.076  | 88.162 | 40.351 | 0.00 | 0.00 |
| ATOM 16197 | HB2  | ASN 1075 | 98.779  | 88.394 | 41.374 | 0.00 | 0.00 |
| ATOM 16198 | HB3  | ASN 1075 | 100.166 | 88.203 | 40.340 | 0.00 | 0.00 |
| ATOM 16199 | CG   | ASN 1075 | 98.598  | 89.344 | 39.480 | 0.00 | 0.00 |
| ATOM 16200 | OD1  | ASN 1075 | 97.991  | 89.242 | 38.497 | 0.00 | 0.00 |
| ATOM 16201 | ND2  | ASN 1075 | 99.014  | 90.528 | 39.887 | 0.00 | 0.00 |
| ATOM 16202 | 1HD2 | ASN 1075 | 98.921  | 91.292 | 39.233 | 0.00 | 0.00 |
| ATOM 16203 | 2HD2 | ASN 1075 | 99.490  | 90.409 | 40.770 | 0.00 | 0.00 |
| ATOM 16204 | C    | ASN 1075 | 98.847  | 86.542 | 38.430 | 0.00 | 0.00 |
| ATOM 16205 | O    | ASN 1075 | 100.000 | 86.547 | 38.055 | 0.00 | 0.00 |
| ATOM 16206 | N    | PRO 1076 | 97.872  | 86.175 | 37.625 | 0.00 | 0.00 |
| ATOM 16207 | CD   | PRO 1076 | 96.458  | 86.380 | 37.825 | 0.00 | 0.00 |
| ATOM 16208 | HD2  | PRO 1076 | 96.247  | 87.322 | 38.330 | 0.00 | 0.00 |
| ATOM 16209 | HD3  | PRO 1076 | 96.192  | 85.568 | 38.502 | 0.00 | 0.00 |
| ATOM 16210 | CG   | PRO 1076 | 95.785  | 86.229 | 36.460 | 0.00 | 0.00 |
| ATOM 16211 | HG2  | PRO 1076 | 94.799  | 85.776 | 36.562 | 0.00 | 0.00 |
| ATOM 16212 | HG3  | PRO 1076 | 95.704  | 87.132 | 35.853 | 0.00 | 0.00 |
| ATOM 16213 | CB   | PRO 1076 | 96.699  | 85.230 | 35.784 | 0.00 | 0.00 |
| ATOM 16214 | HB2  | PRO 1076 | 96.472  | 84.213 | 36.104 | 0.00 | 0.00 |
| ATOM 16215 | HB3  | PRO 1076 | 96.610  | 85.268 | 34.698 | 0.00 | 0.00 |
| ATOM 16216 | CA   | PRO 1076 | 98.118  | 85.584 | 36.298 | 0.00 | 0.00 |
| ATOM 16217 | HA   | PRO 1076 | 98.670  | 84.644 | 36.311 | 0.00 | 0.00 |
| ATOM 16218 | C    | PRO 1076 | 98.775  | 86.543 | 35.270 | 0.00 | 0.00 |
| ATOM 16219 | O    | PRO 1076 | 99.406  | 86.168 | 34.273 | 0.00 | 0.00 |
| ATOM 16220 | N    | ASP 1077 | 98.544  | 87.861 | 35.409 | 0.00 | 0.00 |

|      |       |      |     |      |         |        |        |      |      |
|------|-------|------|-----|------|---------|--------|--------|------|------|
| ATOM | 16221 | H    | ASP | 1077 | 97.991  | 88.212 | 36.178 | 0.00 | 0.00 |
| ATOM | 16222 | CA   | ASP | 1077 | 99.071  | 88.958 | 34.659 | 0.00 | 0.00 |
| ATOM | 16223 | HA   | ASP | 1077 | 98.613  | 88.821 | 33.679 | 0.00 | 0.00 |
| ATOM | 16224 | CB   | ASP | 1077 | 98.439  | 90.278 | 35.128 | 0.00 | 0.00 |
| ATOM | 16225 | HB2  | ASP | 1077 | 97.357  | 90.169 | 35.053 | 0.00 | 0.00 |
| ATOM | 16226 | HB3  | ASP | 1077 | 98.492  | 90.390 | 36.211 | 0.00 | 0.00 |
| ATOM | 16227 | CG   | ASP | 1077 | 98.892  | 91.590 | 34.390 | 0.00 | 0.00 |
| ATOM | 16228 | OD1  | ASP | 1077 | 99.602  | 92.360 | 35.054 | 0.00 | 0.00 |
| ATOM | 16229 | OD2  | ASP | 1077 | 98.613  | 91.844 | 33.182 | 0.00 | 0.00 |
| ATOM | 16230 | C    | ASP | 1077 | 100.644 | 88.934 | 34.691 | 0.00 | 0.00 |
| ATOM | 16231 | O    | ASP | 1077 | 101.267 | 89.310 | 33.684 | 0.00 | 0.00 |
| ATOM | 16232 | N    | ILE | 1078 | 101.304 | 88.605 | 35.835 | 0.00 | 0.00 |
| ATOM | 16233 | H    | ILE | 1078 | 100.695 | 88.164 | 36.509 | 0.00 | 0.00 |
| ATOM | 16234 | CA   | ILE | 1078 | 102.728 | 88.817 | 36.263 | 0.00 | 0.00 |
| ATOM | 16235 | HA   | ILE | 1078 | 103.313 | 88.964 | 35.355 | 0.00 | 0.00 |
| ATOM | 16236 | CB   | ILE | 1078 | 102.973 | 90.093 | 37.028 | 0.00 | 0.00 |
| ATOM | 16237 | HB   | ILE | 1078 | 104.055 | 90.221 | 37.064 | 0.00 | 0.00 |
| ATOM | 16238 | CG2  | ILE | 1078 | 102.577 | 91.203 | 36.069 | 0.00 | 0.00 |
| ATOM | 16239 | 1HG2 | ILE | 1078 | 102.998 | 91.158 | 35.065 | 0.00 | 0.00 |
| ATOM | 16240 | 2HG2 | ILE | 1078 | 101.494 | 91.143 | 35.965 | 0.00 | 0.00 |
| ATOM | 16241 | 3HG2 | ILE | 1078 | 102.895 | 92.170 | 36.459 | 0.00 | 0.00 |
| ATOM | 16242 | CG1  | ILE | 1078 | 102.309 | 90.176 | 38.416 | 0.00 | 0.00 |
| ATOM | 16243 | 2HG1 | ILE | 1078 | 101.243 | 90.162 | 38.185 | 0.00 | 0.00 |
| ATOM | 16244 | 3HG1 | ILE | 1078 | 102.501 | 89.277 | 39.002 | 0.00 | 0.00 |
| ATOM | 16245 | CD1  | ILE | 1078 | 102.564 | 91.400 | 39.302 | 0.00 | 0.00 |
| ATOM | 16246 | 1HD1 | ILE | 1078 | 103.625 | 91.639 | 39.240 | 0.00 | 0.00 |

ATOM 16247 2HD1 ILE 1078 102.047 92.277 38.910 0.00 0.00  
ATOM 16248 3HD1 ILE 1078 102.295 91.192 40.338 0.00 0.00  
ATOM 16249 C ILE 1078 103.375 87.622 36.947 0.00 0.00  
ATOM 16250 O ILE 1078 104.530 87.756 37.281 0.00 0.00  
ATOM 16251 N GLN 1079 102.613 86.563 37.144 0.00 0.00  
ATOM 16252 H GLN 1079 101.611 86.550 37.016 0.00 0.00  
ATOM 16253 CA GLN 1079 103.230 85.307 37.386 0.00 0.00  
ATOM 16254 HA GLN 1079 104.315 85.395 37.454 0.00 0.00  
ATOM 16255 CB GLN 1079 102.751 84.723 38.702 0.00 0.00  
ATOM 16256 HB2 GLN 1079 101.717 84.401 38.576 0.00 0.00  
ATOM 16257 HB3 GLN 1079 103.388 83.871 38.939 0.00 0.00  
ATOM 16258 CG GLN 1079 102.866 85.777 39.843 0.00 0.00  
ATOM 16259 HG2 GLN 1079 103.833 86.277 39.800 0.00 0.00  
ATOM 16260 HG3 GLN 1079 102.095 86.525 39.657 0.00 0.00  
ATOM 16261 CD GLN 1079 102.661 85.250 41.205 0.00 0.00  
ATOM 16262 OE1 GLN 1079 101.553 85.326 41.751 0.00 0.00  
ATOM 16263 NE2 GLN 1079 103.633 84.707 41.851 0.00 0.00  
ATOM 16264 1HE2 GLN 1079 103.485 84.511 42.830 0.00 0.00  
ATOM 16265 2HE2 GLN 1079 104.571 84.635 41.482 0.00 0.00  
ATOM 16266 C GLN 1079 102.887 84.284 36.302 0.00 0.00  
ATOM 16267 O GLN 1079 101.703 84.256 35.857 0.00 0.00  
ATOM 16268 N PRO 1080 103.809 83.420 35.843 0.00 0.00  
ATOM 16269 CD PRO 1080 105.170 83.248 36.372 0.00 0.00  
ATOM 16270 HD2 PRO 1080 105.749 84.111 36.045 0.00 0.00  
ATOM 16271 HD3 PRO 1080 105.112 83.127 37.454 0.00 0.00  
ATOM 16272 CG PRO 1080 105.795 82.136 35.453 0.00 0.00

|      |       |          |      |         |        |        |      |      |
|------|-------|----------|------|---------|--------|--------|------|------|
| ATOM | 16273 | HG2 PRO  | 1080 | 106.751 | 82.496 | 35.074 | 0.00 | 0.00 |
| ATOM | 16274 | HG3 PRO  | 1080 | 106.011 | 81.253 | 36.055 | 0.00 | 0.00 |
| ATOM | 16275 | CB PRO   | 1080 | 104.777 | 81.901 | 34.337 | 0.00 | 0.00 |
| ATOM | 16276 | HB2 PRO  | 1080 | 105.075 | 82.450 | 33.444 | 0.00 | 0.00 |
| ATOM | 16277 | HB3 PRO  | 1080 | 104.846 | 80.877 | 33.968 | 0.00 | 0.00 |
| ATOM | 16278 | CA PRO   | 1080 | 103.447 | 82.477 | 34.797 | 0.00 | 0.00 |
| ATOM | 16279 | HA PRO   | 1080 | 103.017 | 83.041 | 33.969 | 0.00 | 0.00 |
| ATOM | 16280 | C PRO    | 1080 | 102.452 | 81.310 | 35.145 | 0.00 | 0.00 |
| ATOM | 16281 | O PRO    | 1080 | 102.382 | 81.020 | 36.310 | 0.00 | 0.00 |
| ATOM | 16282 | N ASN    | 1081 | 101.907 | 80.589 | 34.150 | 0.00 | 0.00 |
| ATOM | 16283 | H ASN    | 1081 | 102.071 | 80.940 | 33.217 | 0.00 | 0.00 |
| ATOM | 16284 | CA ASN   | 1081 | 101.042 | 79.388 | 34.223 | 0.00 | 0.00 |
| ATOM | 16285 | HA ASN   | 1081 | 100.501 | 79.465 | 33.280 | 0.00 | 0.00 |
| ATOM | 16286 | CB ASN   | 1081 | 101.832 | 78.105 | 34.067 | 0.00 | 0.00 |
| ATOM | 16287 | HB2 ASN  | 1081 | 102.608 | 78.235 | 33.312 | 0.00 | 0.00 |
| ATOM | 16288 | HB3 ASN  | 1081 | 102.275 | 77.891 | 35.039 | 0.00 | 0.00 |
| ATOM | 16289 | CG ASN   | 1081 | 100.946 | 76.912 | 33.605 | 0.00 | 0.00 |
| ATOM | 16290 | OD1 ASN  | 1081 | 99.941  | 77.095 | 32.926 | 0.00 | 0.00 |
| ATOM | 16291 | ND2 ASN  | 1081 | 101.427 | 75.754 | 33.914 | 0.00 | 0.00 |
| ATOM | 16292 | 1HD2 ASN | 1081 | 101.018 | 74.922 | 33.513 | 0.00 | 0.00 |
| ATOM | 16293 | 2HD2 ASN | 1081 | 102.217 | 75.612 | 34.527 | 0.00 | 0.00 |
| ATOM | 16294 | C ASN    | 1081 | 99.931  | 79.351 | 35.382 | 0.00 | 0.00 |
| ATOM | 16295 | O ASN    | 1081 | 99.455  | 78.277 | 35.782 | 0.00 | 0.00 |
| ATOM | 16296 | N VAL    | 1082 | 99.470  | 80.473 | 35.907 | 0.00 | 0.00 |
| ATOM | 16297 | H VAL    | 1082 | 99.859  | 81.297 | 35.469 | 0.00 | 0.00 |
| ATOM | 16298 | CA VAL   | 1082 | 98.279  | 80.519 | 36.770 | 0.00 | 0.00 |

|            |      |     |      |         |        |        |      |      |
|------------|------|-----|------|---------|--------|--------|------|------|
| ATOM 16299 | HA   | VAL | 1082 | 98.485  | 79.791 | 37.554 | 0.00 | 0.00 |
| ATOM 16300 | CB   | VAL | 1082 | 98.054  | 81.871 | 37.405 | 0.00 | 0.00 |
| ATOM 16301 | HB   | VAL | 1082 | 97.726  | 82.630 | 36.695 | 0.00 | 0.00 |
| ATOM 16302 | CG1  | VAL | 1082 | 96.916  | 81.871 | 38.460 | 0.00 | 0.00 |
| ATOM 16303 | 1HG1 | VAL | 1082 | 95.989  | 81.654 | 37.928 | 0.00 | 0.00 |
| ATOM 16304 | 2HG1 | VAL | 1082 | 97.102  | 81.124 | 39.231 | 0.00 | 0.00 |
| ATOM 16305 | 3HG1 | VAL | 1082 | 96.792  | 82.868 | 38.882 | 0.00 | 0.00 |
| ATOM 16306 | CG2  | VAL | 1082 | 99.321  | 82.380 | 38.133 | 0.00 | 0.00 |
| ATOM 16307 | 1HG2 | VAL | 1082 | 100.123 | 82.547 | 37.414 | 0.00 | 0.00 |
| ATOM 16308 | 2HG2 | VAL | 1082 | 99.162  | 83.310 | 38.680 | 0.00 | 0.00 |
| ATOM 16309 | 3HG2 | VAL | 1082 | 99.691  | 81.570 | 38.761 | 0.00 | 0.00 |
| ATOM 16310 | C    | VAL | 1082 | 97.050  | 80.024 | 36.025 | 0.00 | 0.00 |
| ATOM 16311 | O    | VAL | 1082 | 96.812  | 80.378 | 34.879 | 0.00 | 0.00 |
| ATOM 16312 | N    | THR | 1083 | 96.183  | 79.265 | 36.659 | 0.00 | 0.00 |
| ATOM 16313 | H    | THR | 1083 | 96.266  | 78.705 | 37.495 | 0.00 | 0.00 |
| ATOM 16314 | CA   | THR | 1083 | 94.815  | 78.905 | 36.116 | 0.00 | 0.00 |
| ATOM 16315 | HA   | THR | 1083 | 94.681  | 79.616 | 35.301 | 0.00 | 0.00 |
| ATOM 16316 | CB   | THR | 1083 | 94.653  | 77.511 | 35.635 | 0.00 | 0.00 |
| ATOM 16317 | HB   | THR | 1083 | 93.590  | 77.272 | 35.615 | 0.00 | 0.00 |
| ATOM 16318 | CG2  | THR | 1083 | 95.144  | 77.304 | 34.147 | 0.00 | 0.00 |
| ATOM 16319 | 1HG2 | THR | 1083 | 94.795  | 78.019 | 33.402 | 0.00 | 0.00 |
| ATOM 16320 | 2HG2 | THR | 1083 | 96.233  | 77.368 | 34.151 | 0.00 | 0.00 |
| ATOM 16321 | 3HG2 | THR | 1083 | 94.709  | 76.389 | 33.747 | 0.00 | 0.00 |
| ATOM 16322 | OG1  | THR | 1083 | 95.398  | 76.616 | 36.425 | 0.00 | 0.00 |
| ATOM 16323 | HG1  | THR | 1083 | 95.580  | 75.920 | 35.789 | 0.00 | 0.00 |
| ATOM 16324 | C    | THR | 1083 | 93.725  | 79.217 | 37.148 | 0.00 | 0.00 |

|      |       |      |     |      |        |        |        |      |      |
|------|-------|------|-----|------|--------|--------|--------|------|------|
| ATOM | 16325 | O    | THR | 1083 | 92.544 | 78.936 | 36.887 | 0.00 | 0.00 |
| ATOM | 16326 | N    | ILE | 1084 | 94.081 | 79.686 | 38.404 | 0.00 | 0.00 |
| ATOM | 16327 | H    | ILE | 1084 | 95.058 | 79.773 | 38.646 | 0.00 | 0.00 |
| ATOM | 16328 | CA   | ILE | 1084 | 93.213 | 80.179 | 39.455 | 0.00 | 0.00 |
| ATOM | 16329 | HA   | ILE | 1084 | 92.179 | 80.218 | 39.111 | 0.00 | 0.00 |
| ATOM | 16330 | CB   | ILE | 1084 | 93.286 | 79.231 | 40.708 | 0.00 | 0.00 |
| ATOM | 16331 | HB   | ILE | 1084 | 94.336 | 79.185 | 40.997 | 0.00 | 0.00 |
| ATOM | 16332 | CG2  | ILE | 1084 | 92.427 | 79.859 | 41.890 | 0.00 | 0.00 |
| ATOM | 16333 | 1HG2 | ILE | 1084 | 91.453 | 80.172 | 41.514 | 0.00 | 0.00 |
| ATOM | 16334 | 2HG2 | ILE | 1084 | 92.340 | 79.127 | 42.693 | 0.00 | 0.00 |
| ATOM | 16335 | 3HG2 | ILE | 1084 | 93.011 | 80.665 | 42.333 | 0.00 | 0.00 |
| ATOM | 16336 | CG1  | ILE | 1084 | 92.729 | 77.805 | 40.433 | 0.00 | 0.00 |
| ATOM | 16337 | 2HG1 | ILE | 1084 | 91.672 | 77.764 | 40.696 | 0.00 | 0.00 |
| ATOM | 16338 | 3HG1 | ILE | 1084 | 92.883 | 77.520 | 39.392 | 0.00 | 0.00 |
| ATOM | 16339 | CD1  | ILE | 1084 | 93.409 | 76.776 | 41.236 | 0.00 | 0.00 |
| ATOM | 16340 | 1HD1 | ILE | 1084 | 94.444 | 76.660 | 40.914 | 0.00 | 0.00 |
| ATOM | 16341 | 2HD1 | ILE | 1084 | 93.457 | 77.063 | 42.286 | 0.00 | 0.00 |
| ATOM | 16342 | 3HD1 | ILE | 1084 | 92.863 | 75.837 | 41.146 | 0.00 | 0.00 |
| ATOM | 16343 | C    | ILE | 1084 | 93.624 | 81.606 | 39.860 | 0.00 | 0.00 |
| ATOM | 16344 | O    | ILE | 1084 | 94.581 | 81.787 | 40.626 | 0.00 | 0.00 |
| ATOM | 16345 | N    | PRO | 1085 | 92.886 | 82.621 | 39.346 | 0.00 | 0.00 |
| ATOM | 16346 | CD   | PRO | 1085 | 91.969 | 82.631 | 38.242 | 0.00 | 0.00 |
| ATOM | 16347 | HD2  | PRO | 1085 | 92.107 | 81.851 | 37.494 | 0.00 | 0.00 |
| ATOM | 16348 | HD3  | PRO | 1085 | 90.931 | 82.534 | 38.558 | 0.00 | 0.00 |
| ATOM | 16349 | CG   | PRO | 1085 | 92.140 | 83.915 | 37.559 | 0.00 | 0.00 |
| ATOM | 16350 | HG2  | PRO | 1085 | 93.093 | 83.838 | 37.035 | 0.00 | 0.00 |



|            |          |      |        |        |        |      |      |
|------------|----------|------|--------|--------|--------|------|------|
| ATOM 16351 | HG3 PRO  | 1085 | 91.250 | 84.081 | 36.951 | 0.00 | 0.00 |
| ATOM 16352 | CB PRO   | 1085 | 92.319 | 84.918 | 38.663 | 0.00 | 0.00 |
| ATOM 16353 | HB2 PRO  | 1085 | 93.011 | 85.722 | 38.416 | 0.00 | 0.00 |
| ATOM 16354 | HB3 PRO  | 1085 | 91.400 | 85.331 | 39.080 | 0.00 | 0.00 |
| ATOM 16355 | CA PRO   | 1085 | 93.168 | 83.999 | 39.666 | 0.00 | 0.00 |
| ATOM 16356 | HA PRO   | 1085 | 94.243 | 84.045 | 39.492 | 0.00 | 0.00 |
| ATOM 16357 | C PRO    | 1085 | 92.909 | 84.337 | 41.171 | 0.00 | 0.00 |
| ATOM 16358 | O PRO    | 1085 | 91.786 | 84.303 | 41.629 | 0.00 | 0.00 |
| ATOM 16359 | N ILE    | 1086 | 93.958 | 84.778 | 41.859 | 0.00 | 0.00 |
| ATOM 16360 | H ILE    | 1086 | 94.847 | 84.843 | 41.385 | 0.00 | 0.00 |
| ATOM 16361 | CA ILE   | 1086 | 93.843 | 85.465 | 43.135 | 0.00 | 0.00 |
| ATOM 16362 | HA ILE   | 1086 | 92.879 | 85.123 | 43.513 | 0.00 | 0.00 |
| ATOM 16363 | CB ILE   | 1086 | 95.015 | 85.028 | 43.983 | 0.00 | 0.00 |
| ATOM 16364 | HB ILE   | 1086 | 95.963 | 85.409 | 43.602 | 0.00 | 0.00 |
| ATOM 16365 | CG2 ILE  | 1086 | 94.691 | 85.709 | 45.350 | 0.00 | 0.00 |
| ATOM 16366 | 1HG2 ILE | 1086 | 95.358 | 85.236 | 46.071 | 0.00 | 0.00 |
| ATOM 16367 | 2HG2 ILE | 1086 | 94.912 | 86.773 | 45.275 | 0.00 | 0.00 |
| ATOM 16368 | 3HG2 ILE | 1086 | 93.690 | 85.439 | 45.688 | 0.00 | 0.00 |
| ATOM 16369 | CG1 ILE  | 1086 | 95.125 | 83.521 | 44.245 | 0.00 | 0.00 |
| ATOM 16370 | 2HG1 ILE | 1086 | 94.219 | 83.052 | 44.628 | 0.00 | 0.00 |
| ATOM 16371 | 3HG1 ILE | 1086 | 95.231 | 82.930 | 43.335 | 0.00 | 0.00 |
| ATOM 16372 | CD1 ILE  | 1086 | 96.276 | 83.060 | 45.146 | 0.00 | 0.00 |
| ATOM 16373 | 1HD1 ILE | 1086 | 95.976 | 82.209 | 45.758 | 0.00 | 0.00 |
| ATOM 16374 | 2HD1 ILE | 1086 | 97.198 | 82.846 | 44.605 | 0.00 | 0.00 |
| ATOM 16375 | 3HD1 ILE | 1086 | 96.642 | 83.739 | 45.917 | 0.00 | 0.00 |
| ATOM 16376 | C ILE    | 1086 | 93.551 | 86.988 | 42.975 | 0.00 | 0.00 |

|      |       |     |     |      |        |        |        |      |      |
|------|-------|-----|-----|------|--------|--------|--------|------|------|
| ATOM | 16377 | O   | ILE | 1086 | 93.971 | 87.666 | 42.060 | 0.00 | 0.00 |
| ATOM | 16378 | N   | GLY | 1087 | 92.733 | 87.559 | 43.896 | 0.00 | 0.00 |
| ATOM | 16379 | H   | GLY | 1087 | 92.461 | 87.093 | 44.750 | 0.00 | 0.00 |
| ATOM | 16380 | CA  | GLY | 1087 | 92.247 | 88.963 | 43.919 | 0.00 | 0.00 |
| ATOM | 16381 | HA2 | GLY | 1087 | 91.491 | 89.104 | 43.147 | 0.00 | 0.00 |
| ATOM | 16382 | HA3 | GLY | 1087 | 93.101 | 89.570 | 43.621 | 0.00 | 0.00 |
| ATOM | 16383 | C   | GLY | 1087 | 91.574 | 89.490 | 45.150 | 0.00 | 0.00 |
| ATOM | 16384 | O   | GLY | 1087 | 91.815 | 88.943 | 46.262 | 0.00 | 0.00 |
| ATOM | 16385 | N   | ALA | 1088 | 90.734 | 90.450 | 44.980 | 0.00 | 0.00 |
| ATOM | 16386 | H   | ALA | 1088 | 90.586 | 90.896 | 44.086 | 0.00 | 0.00 |
| ATOM | 16387 | CA  | ALA | 1088 | 90.224 | 91.283 | 46.100 | 0.00 | 0.00 |
| ATOM | 16388 | HA  | ALA | 1088 | 91.098 | 91.638 | 46.647 | 0.00 | 0.00 |
| ATOM | 16389 | CB  | ALA | 1088 | 89.438 | 92.488 | 45.646 | 0.00 | 0.00 |
| ATOM | 16390 | HB1 | ALA | 1088 | 88.916 | 92.937 | 46.491 | 0.00 | 0.00 |
| ATOM | 16391 | HB2 | ALA | 1088 | 89.996 | 93.288 | 45.160 | 0.00 | 0.00 |
| ATOM | 16392 | HB3 | ALA | 1088 | 88.691 | 92.122 | 44.942 | 0.00 | 0.00 |
| ATOM | 16393 | C   | ALA | 1088 | 89.353 | 90.425 | 47.081 | 0.00 | 0.00 |
| ATOM | 16394 | O   | ALA | 1088 | 89.595 | 90.282 | 48.288 | 0.00 | 0.00 |
| ATOM | 16395 | N   | ALA | 1089 | 88.358 | 89.737 | 46.465 | 0.00 | 0.00 |
| ATOM | 16396 | H   | ALA | 1089 | 88.418 | 89.761 | 45.457 | 0.00 | 0.00 |
| ATOM | 16397 | CA  | ALA | 1089 | 87.436 | 88.802 | 47.036 | 0.00 | 0.00 |
| ATOM | 16398 | HA  | ALA | 1089 | 87.021 | 89.354 | 47.879 | 0.00 | 0.00 |
| ATOM | 16399 | CB  | ALA | 1089 | 86.370 | 88.483 | 46.040 | 0.00 | 0.00 |
| ATOM | 16400 | HB1 | ALA | 1089 | 85.604 | 87.870 | 46.514 | 0.00 | 0.00 |
| ATOM | 16401 | HB2 | ALA | 1089 | 86.014 | 89.447 | 45.675 | 0.00 | 0.00 |
| ATOM | 16402 | HB3 | ALA | 1089 | 86.709 | 87.933 | 45.162 | 0.00 | 0.00 |

|      |       |      |     |      |        |        |        |      |      |
|------|-------|------|-----|------|--------|--------|--------|------|------|
| ATOM | 16403 | C    | ALA | 1089 | 87.945 | 87.534 | 47.630 | 0.00 | 0.00 |
| ATOM | 16404 | O    | ALA | 1089 | 87.098 | 86.866 | 48.227 | 0.00 | 0.00 |
| ATOM | 16405 | N    | THR | 1090 | 89.232 | 87.252 | 47.482 | 0.00 | 0.00 |
| ATOM | 16406 | H    | THR | 1090 | 89.737 | 87.806 | 46.805 | 0.00 | 0.00 |
| ATOM | 16407 | CA   | THR | 1090 | 89.706 | 85.868 | 47.828 | 0.00 | 0.00 |
| ATOM | 16408 | HA   | THR | 1090 | 88.947 | 85.131 | 47.565 | 0.00 | 0.00 |
| ATOM | 16409 | CB   | THR | 1090 | 90.975 | 85.463 | 46.914 | 0.00 | 0.00 |
| ATOM | 16410 | HB   | THR | 1090 | 91.835 | 85.951 | 47.373 | 0.00 | 0.00 |
| ATOM | 16411 | CG2  | THR | 1090 | 91.356 | 83.992 | 46.891 | 0.00 | 0.00 |
| ATOM | 16412 | 1HG2 | THR | 1090 | 91.999 | 83.875 | 47.763 | 0.00 | 0.00 |
| ATOM | 16413 | 2HG2 | THR | 1090 | 90.459 | 83.372 | 46.886 | 0.00 | 0.00 |
| ATOM | 16414 | 3HG2 | THR | 1090 | 92.075 | 83.754 | 46.108 | 0.00 | 0.00 |
| ATOM | 16415 | OG1  | THR | 1090 | 90.721 | 85.900 | 45.615 | 0.00 | 0.00 |
| ATOM | 16416 | HG1  | THR | 1090 | 89.855 | 85.635 | 45.297 | 0.00 | 0.00 |
| ATOM | 16417 | C    | THR | 1090 | 90.166 | 85.834 | 49.308 | 0.00 | 0.00 |
| ATOM | 16418 | O    | THR | 1090 | 91.043 | 86.560 | 49.675 | 0.00 | 0.00 |
| ATOM | 16419 | N    | GLU | 1091 | 89.665 | 84.876 | 50.060 | 0.00 | 0.00 |
| ATOM | 16420 | H    | GLU | 1091 | 89.003 | 84.262 | 49.607 | 0.00 | 0.00 |
| ATOM | 16421 | CA   | GLU | 1091 | 90.204 | 84.254 | 51.262 | 0.00 | 0.00 |
| ATOM | 16422 | HA   | GLU | 1091 | 90.808 | 85.044 | 51.708 | 0.00 | 0.00 |
| ATOM | 16423 | CB   | GLU | 1091 | 89.005 | 83.827 | 52.075 | 0.00 | 0.00 |
| ATOM | 16424 | HB2  | GLU | 1091 | 88.587 | 84.766 | 52.437 | 0.00 | 0.00 |
| ATOM | 16425 | HB3  | GLU | 1091 | 88.278 | 83.238 | 51.515 | 0.00 | 0.00 |
| ATOM | 16426 | CG   | GLU | 1091 | 89.274 | 83.085 | 53.456 | 0.00 | 0.00 |
| ATOM | 16427 | HG2  | GLU | 1091 | 88.351 | 82.771 | 53.943 | 0.00 | 0.00 |
| ATOM | 16428 | HG3  | GLU | 1091 | 89.963 | 82.271 | 53.232 | 0.00 | 0.00 |

|      |       |      |     |      |        |        |        |      |      |
|------|-------|------|-----|------|--------|--------|--------|------|------|
| ATOM | 16429 | CD   | GLU | 1091 | 90.166 | 83.917 | 54.357 | 0.00 | 0.00 |
| ATOM | 16430 | OE1  | GLU | 1091 | 89.616 | 84.593 | 55.260 | 0.00 | 0.00 |
| ATOM | 16431 | OE2  | GLU | 1091 | 91.375 | 83.840 | 54.171 | 0.00 | 0.00 |
| ATOM | 16432 | C    | GLU | 1091 | 91.156 | 83.095 | 50.900 | 0.00 | 0.00 |
| ATOM | 16433 | O    | GLU | 1091 | 91.026 | 82.459 | 49.872 | 0.00 | 0.00 |
| ATOM | 16434 | N    | VAL | 1092 | 92.123 | 82.773 | 51.748 | 0.00 | 0.00 |
| ATOM | 16435 | H    | VAL | 1092 | 92.212 | 83.184 | 52.667 | 0.00 | 0.00 |
| ATOM | 16436 | CA   | VAL | 1092 | 93.052 | 81.676 | 51.587 | 0.00 | 0.00 |
| ATOM | 16437 | HA   | VAL | 1092 | 92.830 | 81.133 | 50.668 | 0.00 | 0.00 |
| ATOM | 16438 | CB   | VAL | 1092 | 94.479 | 82.218 | 51.663 | 0.00 | 0.00 |
| ATOM | 16439 | HB   | VAL | 1092 | 94.652 | 82.470 | 52.709 | 0.00 | 0.00 |
| ATOM | 16440 | CG1  | VAL | 1092 | 95.431 | 81.071 | 51.255 | 0.00 | 0.00 |
| ATOM | 16441 | 1HG1 | VAL | 1092 | 96.415 | 81.480 | 51.025 | 0.00 | 0.00 |
| ATOM | 16442 | 2HG1 | VAL | 1092 | 95.618 | 80.253 | 51.950 | 0.00 | 0.00 |
| ATOM | 16443 | 3HG1 | VAL | 1092 | 95.091 | 80.747 | 50.271 | 0.00 | 0.00 |
| ATOM | 16444 | CG2  | VAL | 1092 | 94.650 | 83.413 | 50.751 | 0.00 | 0.00 |
| ATOM | 16445 | 1HG2 | VAL | 1092 | 94.262 | 83.158 | 49.765 | 0.00 | 0.00 |
| ATOM | 16446 | 2HG2 | VAL | 1092 | 94.081 | 84.270 | 51.113 | 0.00 | 0.00 |
| ATOM | 16447 | 3HG2 | VAL | 1092 | 95.711 | 83.655 | 50.699 | 0.00 | 0.00 |
| ATOM | 16448 | C    | VAL | 1092 | 92.876 | 80.537 | 52.694 | 0.00 | 0.00 |
| ATOM | 16449 | O    | VAL | 1092 | 92.815 | 80.798 | 53.895 | 0.00 | 0.00 |
| ATOM | 16450 | N    | ILE | 1093 | 92.917 | 79.270 | 52.228 | 0.00 | 0.00 |
| ATOM | 16451 | H    | ILE | 1093 | 93.013 | 79.130 | 51.232 | 0.00 | 0.00 |
| ATOM | 16452 | CA   | ILE | 1093 | 93.196 | 78.104 | 53.093 | 0.00 | 0.00 |
| ATOM | 16453 | HA   | ILE | 1093 | 93.202 | 78.445 | 54.128 | 0.00 | 0.00 |
| ATOM | 16454 | CB   | ILE | 1093 | 92.114 | 77.056 | 52.857 | 0.00 | 0.00 |

|            |      |     |      |        |        |        |      |      |
|------------|------|-----|------|--------|--------|--------|------|------|
| ATOM 16455 | HB   | ILE | 1093 | 91.982 | 77.083 | 51.775 | 0.00 | 0.00 |
| ATOM 16456 | CG2  | ILE | 1093 | 92.502 | 75.630 | 53.311 | 0.00 | 0.00 |
| ATOM 16457 | 1HG2 | ILE | 1093 | 93.473 | 75.290 | 52.950 | 0.00 | 0.00 |
| ATOM 16458 | 2HG2 | ILE | 1093 | 92.473 | 75.471 | 54.389 | 0.00 | 0.00 |
| ATOM 16459 | 3HG2 | ILE | 1093 | 91.825 | 74.961 | 52.780 | 0.00 | 0.00 |
| ATOM 16460 | CG1  | ILE | 1093 | 90.808 | 77.516 | 53.624 | 0.00 | 0.00 |
| ATOM 16461 | 2HG1 | ILE | 1093 | 90.937 | 77.470 | 54.705 | 0.00 | 0.00 |
| ATOM 16462 | 3HG1 | ILE | 1093 | 90.606 | 78.536 | 53.299 | 0.00 | 0.00 |
| ATOM 16463 | CD1  | ILE | 1093 | 89.672 | 76.568 | 53.397 | 0.00 | 0.00 |
| ATOM 16464 | 1HD1 | ILE | 1093 | 88.752 | 76.845 | 53.911 | 0.00 | 0.00 |
| ATOM 16465 | 2HD1 | ILE | 1093 | 89.417 | 76.510 | 52.339 | 0.00 | 0.00 |
| ATOM 16466 | 3HD1 | ILE | 1093 | 89.963 | 75.560 | 53.691 | 0.00 | 0.00 |
| ATOM 16467 | C    | ILE | 1093 | 94.594 | 77.655 | 52.840 | 0.00 | 0.00 |
| ATOM 16468 | O    | ILE | 1093 | 94.949 | 77.107 | 51.766 | 0.00 | 0.00 |
| ATOM 16469 | N    | ALA | 1094 | 95.429 | 77.815 | 53.886 | 0.00 | 0.00 |
| ATOM 16470 | H    | ALA | 1094 | 95.001 | 78.090 | 54.759 | 0.00 | 0.00 |
| ATOM 16471 | CA   | ALA | 1094 | 96.870 | 77.784 | 53.755 | 0.00 | 0.00 |
| ATOM 16472 | HA   | ALA | 1094 | 97.137 | 77.686 | 52.703 | 0.00 | 0.00 |
| ATOM 16473 | CB   | ALA | 1094 | 97.579 | 78.988 | 54.377 | 0.00 | 0.00 |
| ATOM 16474 | HB1  | ALA | 1094 | 98.641 | 79.037 | 54.136 | 0.00 | 0.00 |
| ATOM 16475 | HB2  | ALA | 1094 | 97.167 | 79.907 | 53.960 | 0.00 | 0.00 |
| ATOM 16476 | HB3  | ALA | 1094 | 97.314 | 78.994 | 55.434 | 0.00 | 0.00 |
| ATOM 16477 | C    | ALA | 1094 | 97.257 | 76.439 | 54.346 | 0.00 | 0.00 |
| ATOM 16478 | O    | ALA | 1094 | 97.865 | 76.364 | 55.404 | 0.00 | 0.00 |
| ATOM 16479 | N    | ALA | 1095 | 96.836 | 75.381 | 53.677 | 0.00 | 0.00 |
| ATOM 16480 | H    | ALA | 1095 | 96.522 | 75.653 | 52.757 | 0.00 | 0.00 |

|            |     |     |      |         |        |        |      |      |
|------------|-----|-----|------|---------|--------|--------|------|------|
| ATOM 16481 | CA  | ALA | 1095 | 96.796  | 73.947 | 54.050 | 0.00 | 0.00 |
| ATOM 16482 | HA  | ALA | 1095 | 96.588  | 73.881 | 55.117 | 0.00 | 0.00 |
| ATOM 16483 | CB  | ALA | 1095 | 95.656  | 73.211 | 53.206 | 0.00 | 0.00 |
| ATOM 16484 | HB1 | ALA | 1095 | 95.732  | 72.135 | 53.365 | 0.00 | 0.00 |
| ATOM 16485 | HB2 | ALA | 1095 | 94.700  | 73.419 | 53.686 | 0.00 | 0.00 |
| ATOM 16486 | HB3 | ALA | 1095 | 95.818  | 73.441 | 52.154 | 0.00 | 0.00 |
| ATOM 16487 | C   | ALA | 1095 | 98.162  | 73.241 | 53.915 | 0.00 | 0.00 |
| ATOM 16488 | O   | ALA | 1095 | 98.210  | 72.180 | 53.294 | 0.00 | 0.00 |
| ATOM 16489 | N   | GLU | 1096 | 99.206  | 73.824 | 54.401 | 0.00 | 0.00 |
| ATOM 16490 | H   | GLU | 1096 | 98.882  | 74.650 | 54.885 | 0.00 | 0.00 |
| ATOM 16491 | CA  | GLU | 1096 | 100.617 | 73.526 | 54.059 | 0.00 | 0.00 |
| ATOM 16492 | HA  | GLU | 1096 | 100.653 | 73.504 | 52.969 | 0.00 | 0.00 |
| ATOM 16493 | CB  | GLU | 1096 | 101.542 | 74.690 | 54.483 | 0.00 | 0.00 |
| ATOM 16494 | HB2 | GLU | 1096 | 101.335 | 75.078 | 55.480 | 0.00 | 0.00 |
| ATOM 16495 | HB3 | GLU | 1096 | 102.563 | 74.349 | 54.308 | 0.00 | 0.00 |
| ATOM 16496 | CG  | GLU | 1096 | 101.258 | 75.904 | 53.627 | 0.00 | 0.00 |
| ATOM 16497 | HG2 | GLU | 1096 | 101.081 | 75.579 | 52.602 | 0.00 | 0.00 |
| ATOM 16498 | HG3 | GLU | 1096 | 100.327 | 76.340 | 53.990 | 0.00 | 0.00 |
| ATOM 16499 | CD  | GLU | 1096 | 102.303 | 76.984 | 53.769 | 0.00 | 0.00 |
| ATOM 16500 | OE1 | GLU | 1096 | 103.479 | 76.673 | 53.399 | 0.00 | 0.00 |
| ATOM 16501 | OE2 | GLU | 1096 | 101.998 | 78.065 | 54.261 | 0.00 | 0.00 |
| ATOM 16502 | C   | GLU | 1096 | 100.973 | 72.206 | 54.586 | 0.00 | 0.00 |
| ATOM 16503 | O   | GLU | 1096 | 101.067 | 72.024 | 55.838 | 0.00 | 0.00 |
| ATOM 16504 | N   | GLY | 1097 | 101.308 | 71.317 | 53.697 | 0.00 | 0.00 |
| ATOM 16505 | H   | GLY | 1097 | 101.270 | 71.654 | 52.746 | 0.00 | 0.00 |
| ATOM 16506 | CA  | GLY | 1097 | 101.658 | 69.879 | 53.856 | 0.00 | 0.00 |

|      |       |     |     |      |         |        |        |      |      |
|------|-------|-----|-----|------|---------|--------|--------|------|------|
| ATOM | 16507 | HA2 | GLY | 1097 | 102.138 | 69.567 | 52.928 | 0.00 | 0.00 |
| ATOM | 16508 | HA3 | GLY | 1097 | 102.270 | 69.825 | 54.756 | 0.00 | 0.00 |
| ATOM | 16509 | C   | GLY | 1097 | 100.441 | 68.995 | 54.019 | 0.00 | 0.00 |
| ATOM | 16510 | O   | GLY | 1097 | 100.533 | 67.760 | 53.847 | 0.00 | 0.00 |
| ATOM | 16511 | N   | LYS | 1098 | 99.244  | 69.521 | 54.286 | 0.00 | 0.00 |
| ATOM | 16512 | H   | LYS | 1098 | 99.104  | 70.517 | 54.192 | 0.00 | 0.00 |
| ATOM | 16513 | CA  | LYS | 1098 | 98.011  | 68.723 | 54.493 | 0.00 | 0.00 |
| ATOM | 16514 | HA  | LYS | 1098 | 98.229  | 67.909 | 55.185 | 0.00 | 0.00 |
| ATOM | 16515 | CB  | LYS | 1098 | 96.842  | 69.494 | 55.231 | 0.00 | 0.00 |
| ATOM | 16516 | HB2 | LYS | 1098 | 96.450  | 70.237 | 54.536 | 0.00 | 0.00 |
| ATOM | 16517 | HB3 | LYS | 1098 | 96.048  | 68.786 | 55.467 | 0.00 | 0.00 |
| ATOM | 16518 | CG  | LYS | 1098 | 97.278  | 70.096 | 56.635 | 0.00 | 0.00 |
| ATOM | 16519 | HG2 | LYS | 1098 | 98.064  | 69.506 | 57.105 | 0.00 | 0.00 |
| ATOM | 16520 | HG3 | LYS | 1098 | 97.728  | 71.072 | 56.457 | 0.00 | 0.00 |
| ATOM | 16521 | CD  | LYS | 1098 | 96.101  | 70.200 | 57.574 | 0.00 | 0.00 |
| ATOM | 16522 | HD2 | LYS | 1098 | 95.491  | 71.053 | 57.278 | 0.00 | 0.00 |
| ATOM | 16523 | HD3 | LYS | 1098 | 95.512  | 69.287 | 57.485 | 0.00 | 0.00 |
| ATOM | 16524 | CE  | LYS | 1098 | 96.555  | 70.357 | 59.053 | 0.00 | 0.00 |
| ATOM | 16525 | HE2 | LYS | 1098 | 95.688  | 70.316 | 59.713 | 0.00 | 0.00 |
| ATOM | 16526 | HE3 | LYS | 1098 | 97.108  | 69.458 | 59.325 | 0.00 | 0.00 |
| ATOM | 16527 | NZ  | LYS | 1098 | 97.382  | 71.536 | 59.363 | 0.00 | 0.00 |
| ATOM | 16528 | HZ1 | LYS | 1098 | 97.543  | 71.552 | 60.360 | 0.00 | 0.00 |
| ATOM | 16529 | HZ2 | LYS | 1098 | 98.243  | 71.623 | 58.842 | 0.00 | 0.00 |
| ATOM | 16530 | HZ3 | LYS | 1098 | 96.818  | 72.362 | 59.220 | 0.00 | 0.00 |
| ATOM | 16531 | C   | LYS | 1098 | 97.546  | 67.988 | 53.216 | 0.00 | 0.00 |
| ATOM | 16532 | O   | LYS | 1098 | 97.683  | 68.503 | 52.093 | 0.00 | 0.00 |

|            |      |     |      |        |        |        |      |      |
|------------|------|-----|------|--------|--------|--------|------|------|
| ATOM 16533 | N    | ILE | 1099 | 96.871 | 66.895 | 53.450 | 0.00 | 0.00 |
| ATOM 16534 | H    | ILE | 1099 | 96.624 | 66.729 | 54.416 | 0.00 | 0.00 |
| ATOM 16535 | CA   | ILE | 1099 | 96.108 | 66.112 | 52.454 | 0.00 | 0.00 |
| ATOM 16536 | HA   | ILE | 1099 | 96.666 | 66.234 | 51.526 | 0.00 | 0.00 |
| ATOM 16537 | CB   | ILE | 1099 | 96.148 | 64.603 | 52.833 | 0.00 | 0.00 |
| ATOM 16538 | HB   | ILE | 1099 | 95.602 | 64.510 | 53.772 | 0.00 | 0.00 |
| ATOM 16539 | CG2  | ILE | 1099 | 95.355 | 63.868 | 51.667 | 0.00 | 0.00 |
| ATOM 16540 | 1HG2 | ILE | 1099 | 95.712 | 64.117 | 50.667 | 0.00 | 0.00 |
| ATOM 16541 | 2HG2 | ILE | 1099 | 95.307 | 62.782 | 51.741 | 0.00 | 0.00 |
| ATOM 16542 | 3HG2 | ILE | 1099 | 94.307 | 64.169 | 51.692 | 0.00 | 0.00 |
| ATOM 16543 | CG1  | ILE | 1099 | 97.638 | 64.051 | 53.031 | 0.00 | 0.00 |
| ATOM 16544 | 2HG1 | ILE | 1099 | 98.148 | 64.319 | 52.106 | 0.00 | 0.00 |
| ATOM 16545 | 3HG1 | ILE | 1099 | 98.188 | 64.567 | 53.818 | 0.00 | 0.00 |
| ATOM 16546 | CD1  | ILE | 1099 | 97.864 | 62.496 | 53.091 | 0.00 | 0.00 |
| ATOM 16547 | 1HD1 | ILE | 1099 | 98.920 | 62.258 | 53.219 | 0.00 | 0.00 |
| ATOM 16548 | 2HD1 | ILE | 1099 | 97.290 | 62.210 | 53.972 | 0.00 | 0.00 |
| ATOM 16549 | 3HD1 | ILE | 1099 | 97.515 | 61.914 | 52.238 | 0.00 | 0.00 |
| ATOM 16550 | C    | ILE | 1099 | 94.637 | 66.708 | 52.292 | 0.00 | 0.00 |
| ATOM 16551 | O    | ILE | 1099 | 94.089 | 67.122 | 53.366 | 0.00 | 0.00 |
| ATOM 16552 | N    | VAL | 1100 | 94.108 | 66.871 | 51.035 | 0.00 | 0.00 |
| ATOM 16553 | H    | VAL | 1100 | 94.648 | 66.559 | 50.241 | 0.00 | 0.00 |
| ATOM 16554 | CA   | VAL | 1100 | 92.704 | 67.284 | 50.839 | 0.00 | 0.00 |
| ATOM 16555 | HA   | VAL | 1100 | 92.162 | 67.346 | 51.783 | 0.00 | 0.00 |
| ATOM 16556 | CB   | VAL | 1100 | 92.584 | 68.781 | 50.345 | 0.00 | 0.00 |
| ATOM 16557 | HB   | VAL | 1100 | 92.981 | 69.407 | 51.144 | 0.00 | 0.00 |
| ATOM 16558 | CG1  | VAL | 1100 | 93.210 | 69.071 | 48.973 | 0.00 | 0.00 |



|      |       |      |     |      |        |        |        |      |      |
|------|-------|------|-----|------|--------|--------|--------|------|------|
| ATOM | 16559 | 1HG1 | VAL | 1100 | 94.285 | 68.925 | 49.082 | 0.00 | 0.00 |
| ATOM | 16560 | 2HG1 | VAL | 1100 | 92.888 | 68.433 | 48.150 | 0.00 | 0.00 |
| ATOM | 16561 | 3HG1 | VAL | 1100 | 93.176 | 70.108 | 48.639 | 0.00 | 0.00 |
| ATOM | 16562 | CG2  | VAL | 1100 | 91.159 | 69.298 | 50.241 | 0.00 | 0.00 |
| ATOM | 16563 | 1HG2 | VAL | 1100 | 90.704 | 69.341 | 51.231 | 0.00 | 0.00 |
| ATOM | 16564 | 2HG2 | VAL | 1100 | 91.123 | 70.283 | 49.775 | 0.00 | 0.00 |
| ATOM | 16565 | 3HG2 | VAL | 1100 | 90.497 | 68.663 | 49.653 | 0.00 | 0.00 |
| ATOM | 16566 | C    | VAL | 1100 | 91.950 | 66.261 | 49.961 | 0.00 | 0.00 |
| ATOM | 16567 | O    | VAL | 1100 | 92.349 | 65.875 | 48.873 | 0.00 | 0.00 |
| ATOM | 16568 | N    | THR | 1101 | 90.727 | 65.950 | 50.468 | 0.00 | 0.00 |
| ATOM | 16569 | H    | THR | 1101 | 90.326 | 66.515 | 51.202 | 0.00 | 0.00 |
| ATOM | 16570 | CA   | THR | 1101 | 89.810 | 65.043 | 49.758 | 0.00 | 0.00 |
| ATOM | 16571 | HA   | THR | 1101 | 90.208 | 64.707 | 48.801 | 0.00 | 0.00 |
| ATOM | 16572 | CB   | THR | 1101 | 89.592 | 63.763 | 50.673 | 0.00 | 0.00 |
| ATOM | 16573 | HB   | THR | 1101 | 88.949 | 63.137 | 50.055 | 0.00 | 0.00 |
| ATOM | 16574 | CG2  | THR | 1101 | 90.915 | 62.954 | 50.968 | 0.00 | 0.00 |
| ATOM | 16575 | 1HG2 | THR | 1101 | 90.749 | 62.228 | 51.764 | 0.00 | 0.00 |
| ATOM | 16576 | 2HG2 | THR | 1101 | 91.297 | 62.445 | 50.082 | 0.00 | 0.00 |
| ATOM | 16577 | 3HG2 | THR | 1101 | 91.572 | 63.671 | 51.460 | 0.00 | 0.00 |
| ATOM | 16578 | OG1  | THR | 1101 | 88.873 | 63.815 | 51.875 | 0.00 | 0.00 |
| ATOM | 16579 | HG1  | THR | 1101 | 87.955 | 63.898 | 51.608 | 0.00 | 0.00 |
| ATOM | 16580 | C    | THR | 1101 | 88.487 | 65.737 | 49.594 | 0.00 | 0.00 |
| ATOM | 16581 | O    | THR | 1101 | 88.127 | 66.698 | 50.262 | 0.00 | 0.00 |
| ATOM | 16582 | N    | ALA | 1102 | 87.562 | 65.233 | 48.725 | 0.00 | 0.00 |
| ATOM | 16583 | H    | ALA | 1102 | 87.804 | 64.468 | 48.112 | 0.00 | 0.00 |
| ATOM | 16584 | CA   | ALA | 1102 | 86.122 | 65.608 | 48.784 | 0.00 | 0.00 |

|            |     |     |      |        |        |        |      |      |
|------------|-----|-----|------|--------|--------|--------|------|------|
| ATOM 16585 | HA  | ALA | 1102 | 85.943 | 66.681 | 48.861 | 0.00 | 0.00 |
| ATOM 16586 | CB  | ALA | 1102 | 85.509 | 65.164 | 47.413 | 0.00 | 0.00 |
| ATOM 16587 | HB1 | ALA | 1102 | 84.439 | 64.961 | 47.367 | 0.00 | 0.00 |
| ATOM 16588 | HB2 | ALA | 1102 | 85.607 | 65.983 | 46.700 | 0.00 | 0.00 |
| ATOM 16589 | HB3 | ALA | 1102 | 85.949 | 64.247 | 47.020 | 0.00 | 0.00 |
| ATOM 16590 | C   | ALA | 1102 | 85.506 | 64.997 | 50.019 | 0.00 | 0.00 |
| ATOM 16591 | O   | ALA | 1102 | 86.010 | 64.024 | 50.623 | 0.00 | 0.00 |
| ATOM 16592 | N   | GLY | 1103 | 84.330 | 65.582 | 50.483 | 0.00 | 0.00 |
| ATOM 16593 | H   | GLY | 1103 | 84.029 | 66.405 | 49.982 | 0.00 | 0.00 |
| ATOM 16594 | CA  | GLY | 1103 | 83.632 | 65.156 | 51.701 | 0.00 | 0.00 |
| ATOM 16595 | HA2 | GLY | 1103 | 84.433 | 64.904 | 52.396 | 0.00 | 0.00 |
| ATOM 16596 | HA3 | GLY | 1103 | 82.956 | 65.919 | 52.087 | 0.00 | 0.00 |
| ATOM 16597 | C   | GLY | 1103 | 82.825 | 63.833 | 51.473 | 0.00 | 0.00 |
| ATOM 16598 | O   | GLY | 1103 | 82.238 | 63.638 | 50.414 | 0.00 | 0.00 |
| ATOM 16599 | N   | GLY | 1104 | 82.964 | 62.889 | 52.394 | 0.00 | 0.00 |
| ATOM 16600 | H   | GLY | 1104 | 83.471 | 63.066 | 53.249 | 0.00 | 0.00 |
| ATOM 16601 | CA  | GLY | 1104 | 82.435 | 61.583 | 52.171 | 0.00 | 0.00 |
| ATOM 16602 | HA2 | GLY | 1104 | 82.829 | 61.194 | 51.232 | 0.00 | 0.00 |
| ATOM 16603 | HA3 | GLY | 1104 | 82.744 | 60.876 | 52.941 | 0.00 | 0.00 |
| ATOM 16604 | C   | GLY | 1104 | 80.909 | 61.344 | 52.002 | 0.00 | 0.00 |
| ATOM 16605 | O   | GLY | 1104 | 80.106 | 62.161 | 52.453 | 0.00 | 0.00 |
| ATOM 16606 | N   | ILE | 1105 | 80.437 | 60.218 | 51.402 | 0.00 | 0.00 |
| ATOM 16607 | H   | ILE | 1105 | 81.044 | 59.568 | 50.924 | 0.00 | 0.00 |
| ATOM 16608 | CA  | ILE | 1105 | 79.013 | 59.831 | 51.414 | 0.00 | 0.00 |
| ATOM 16609 | HA  | ILE | 1105 | 78.490 | 60.555 | 52.039 | 0.00 | 0.00 |
| ATOM 16610 | CB  | ILE | 1105 | 78.451 | 59.914 | 49.950 | 0.00 | 0.00 |

|            |      |     |      |        |        |        |      |      |
|------------|------|-----|------|--------|--------|--------|------|------|
| ATOM 16611 | HB   | ILE | 1105 | 78.580 | 58.897 | 49.580 | 0.00 | 0.00 |
| ATOM 16612 | CG2  | ILE | 1105 | 76.931 | 59.935 | 49.959 | 0.00 | 0.00 |
| ATOM 16613 | 1HG2 | ILE | 1105 | 76.597 | 58.898 | 50.003 | 0.00 | 0.00 |
| ATOM 16614 | 2HG2 | ILE | 1105 | 76.382 | 60.515 | 50.701 | 0.00 | 0.00 |
| ATOM 16615 | 3HG2 | ILE | 1105 | 76.560 | 60.366 | 49.030 | 0.00 | 0.00 |
| ATOM 16616 | CG1  | ILE | 1105 | 79.178 | 60.911 | 49.036 | 0.00 | 0.00 |
| ATOM 16617 | 2HG1 | ILE | 1105 | 79.608 | 61.720 | 49.627 | 0.00 | 0.00 |
| ATOM 16618 | 3HG1 | ILE | 1105 | 80.066 | 60.383 | 48.690 | 0.00 | 0.00 |
| ATOM 16619 | CD1  | ILE | 1105 | 78.423 | 61.523 | 47.877 | 0.00 | 0.00 |
| ATOM 16620 | 1HD1 | ILE | 1105 | 77.802 | 62.345 | 48.231 | 0.00 | 0.00 |
| ATOM 16621 | 2HD1 | ILE | 1105 | 79.139 | 62.023 | 47.225 | 0.00 | 0.00 |
| ATOM 16622 | 3HD1 | ILE | 1105 | 77.738 | 60.813 | 47.413 | 0.00 | 0.00 |
| ATOM 16623 | C    | ILE | 1105 | 78.846 | 58.443 | 52.079 | 0.00 | 0.00 |
| ATOM 16624 | O    | ILE | 1105 | 79.476 | 57.471 | 51.633 | 0.00 | 0.00 |
| ATOM 16625 | N    | ASP | 1106 | 77.893 | 58.377 | 53.039 | 0.00 | 0.00 |
| ATOM 16626 | H    | ASP | 1106 | 77.416 | 59.229 | 53.295 | 0.00 | 0.00 |
| ATOM 16627 | CA   | ASP | 1106 | 77.379 | 57.037 | 53.427 | 0.00 | 0.00 |
| ATOM 16628 | HA   | ASP | 1106 | 78.052 | 56.321 | 52.955 | 0.00 | 0.00 |
| ATOM 16629 | CB   | ASP | 1106 | 77.288 | 56.780 | 54.932 | 0.00 | 0.00 |
| ATOM 16630 | HB2  | ASP | 1106 | 78.161 | 57.271 | 55.361 | 0.00 | 0.00 |
| ATOM 16631 | HB3  | ASP | 1106 | 76.400 | 57.293 | 55.300 | 0.00 | 0.00 |
| ATOM 16632 | CG   | ASP | 1106 | 77.263 | 55.280 | 55.238 | 0.00 | 0.00 |
| ATOM 16633 | OD1  | ASP | 1106 | 78.319 | 54.618 | 55.269 | 0.00 | 0.00 |
| ATOM 16634 | OD2  | ASP | 1106 | 76.137 | 54.741 | 55.395 | 0.00 | 0.00 |
| ATOM 16635 | C    | ASP | 1106 | 76.004 | 56.877 | 52.724 | 0.00 | 0.00 |
| ATOM 16636 | O    | ASP | 1106 | 75.330 | 57.864 | 52.449 | 0.00 | 0.00 |

|      |       |      |     |      |        |        |        |      |      |
|------|-------|------|-----|------|--------|--------|--------|------|------|
| ATOM | 16637 | N    | THR | 1107 | 75.584 | 55.654 | 52.597 | 0.00 | 0.00 |
| ATOM | 16638 | H    | THR | 1107 | 76.135 | 54.911 | 53.002 | 0.00 | 0.00 |
| ATOM | 16639 | CA   | THR | 1107 | 74.381 | 55.268 | 51.766 | 0.00 | 0.00 |
| ATOM | 16640 | HA   | THR | 1107 | 73.825 | 56.152 | 51.452 | 0.00 | 0.00 |
| ATOM | 16641 | CB   | THR | 1107 | 74.912 | 54.494 | 50.560 | 0.00 | 0.00 |
| ATOM | 16642 | HB   | THR | 1107 | 74.098 | 54.033 | 50.000 | 0.00 | 0.00 |
| ATOM | 16643 | CG2  | THR | 1107 | 75.746 | 55.349 | 49.693 | 0.00 | 0.00 |
| ATOM | 16644 | 1HG2 | THR | 1107 | 75.984 | 54.834 | 48.763 | 0.00 | 0.00 |
| ATOM | 16645 | 2HG2 | THR | 1107 | 75.296 | 56.323 | 49.500 | 0.00 | 0.00 |
| ATOM | 16646 | 3HG2 | THR | 1107 | 76.745 | 55.457 | 50.116 | 0.00 | 0.00 |
| ATOM | 16647 | OG1  | THR | 1107 | 75.744 | 53.470 | 50.991 | 0.00 | 0.00 |
| ATOM | 16648 | HG1  | THR | 1107 | 76.223 | 53.288 | 50.178 | 0.00 | 0.00 |
| ATOM | 16649 | C    | THR | 1107 | 73.356 | 54.454 | 52.553 | 0.00 | 0.00 |
| ATOM | 16650 | O    | THR | 1107 | 72.261 | 54.200 | 52.071 | 0.00 | 0.00 |
| ATOM | 16651 | N    | H21 | 1108 | 73.727 | 54.067 | 53.786 | 0.00 | 0.00 |
| ATOM | 16652 | H    | H21 | 1108 | 74.700 | 54.148 | 54.044 | 0.00 | 0.00 |
| ATOM | 16653 | CA   | H21 | 1108 | 72.947 | 53.218 | 54.700 | 0.00 | 0.00 |
| ATOM | 16654 | HA   | H21 | 1108 | 71.996 | 53.242 | 54.168 | 0.00 | 0.00 |
| ATOM | 16655 | CB   | H21 | 1108 | 73.605 | 51.825 | 54.617 | 0.00 | 0.00 |
| ATOM | 16656 | HB2  | H21 | 1108 | 73.828 | 51.759 | 53.552 | 0.00 | 0.00 |
| ATOM | 16657 | HB3  | H21 | 1108 | 74.511 | 51.916 | 55.216 | 0.00 | 0.00 |
| ATOM | 16658 | CG   | H21 | 1108 | 72.786 | 50.626 | 55.061 | 0.00 | 0.00 |
| ATOM | 16659 | ND1  | H21 | 1108 | 72.977 | 49.313 | 54.628 | 0.00 | 0.00 |
| ATOM | 16660 | HD1  | H21 | 1108 | 73.477 | 49.138 | 53.767 | 0.00 | 0.00 |
| ATOM | 16661 | CE1  | H21 | 1108 | 72.349 | 48.482 | 55.471 | 0.00 | 0.00 |
| ATOM | 16662 | HE1  | H21 | 1108 | 72.575 | 47.434 | 55.599 | 0.00 | 0.00 |

|      |       |      |     |      |        |        |        |      |      |
|------|-------|------|-----|------|--------|--------|--------|------|------|
| ATOM | 16663 | NE2  | H21 | 1108 | 71.662 | 49.169 | 56.413 | 0.00 | 0.00 |
| ATOM | 16664 | CD2  | H21 | 1108 | 71.955 | 50.507 | 56.097 | 0.00 | 0.00 |
| ATOM | 16665 | HD2  | H21 | 1108 | 71.607 | 51.285 | 56.760 | 0.00 | 0.00 |
| ATOM | 16666 | C    | H21 | 1108 | 72.775 | 53.877 | 56.064 | 0.00 | 0.00 |
| ATOM | 16667 | O    | H21 | 1108 | 72.886 | 53.168 | 57.083 | 0.00 | 0.00 |
| ATOM | 16668 | N    | ILE | 1109 | 72.556 | 55.213 | 56.072 | 0.00 | 0.00 |
| ATOM | 16669 | H    | ILE | 1109 | 72.487 | 55.806 | 55.257 | 0.00 | 0.00 |
| ATOM | 16670 | CA   | ILE | 1109 | 72.171 | 55.827 | 57.376 | 0.00 | 0.00 |
| ATOM | 16671 | HA   | ILE | 1109 | 72.950 | 55.513 | 58.071 | 0.00 | 0.00 |
| ATOM | 16672 | CB   | ILE | 1109 | 72.291 | 57.305 | 57.286 | 0.00 | 0.00 |
| ATOM | 16673 | HB   | ILE | 1109 | 71.735 | 57.623 | 56.403 | 0.00 | 0.00 |
| ATOM | 16674 | CG2  | ILE | 1109 | 71.645 | 58.037 | 58.518 | 0.00 | 0.00 |
| ATOM | 16675 | 1HG2 | ILE | 1109 | 71.930 | 57.421 | 59.371 | 0.00 | 0.00 |
| ATOM | 16676 | 2HG2 | ILE | 1109 | 71.842 | 59.097 | 58.682 | 0.00 | 0.00 |
| ATOM | 16677 | 3HG2 | ILE | 1109 | 70.568 | 57.972 | 58.367 | 0.00 | 0.00 |
| ATOM | 16678 | CG1  | ILE | 1109 | 73.731 | 57.802 | 57.116 | 0.00 | 0.00 |
| ATOM | 16679 | 2HG1 | ILE | 1109 | 74.100 | 57.235 | 56.261 | 0.00 | 0.00 |
| ATOM | 16680 | 3HG1 | ILE | 1109 | 73.659 | 58.854 | 56.838 | 0.00 | 0.00 |
| ATOM | 16681 | CD1  | ILE | 1109 | 74.606 | 57.605 | 58.367 | 0.00 | 0.00 |
| ATOM | 16682 | 1HD1 | ILE | 1109 | 74.467 | 58.463 | 59.025 | 0.00 | 0.00 |
| ATOM | 16683 | 2HD1 | ILE | 1109 | 74.349 | 56.623 | 58.765 | 0.00 | 0.00 |
| ATOM | 16684 | 3HD1 | ILE | 1109 | 75.596 | 57.614 | 57.912 | 0.00 | 0.00 |
| ATOM | 16685 | C    | ILE | 1109 | 70.722 | 55.410 | 57.730 | 0.00 | 0.00 |
| ATOM | 16686 | O    | ILE | 1109 | 69.763 | 55.836 | 57.049 | 0.00 | 0.00 |
| ATOM | 16687 | N    | H22 | 1110 | 70.613 | 54.580 | 58.785 | 0.00 | 0.00 |
| ATOM | 16688 | H    | H22 | 1110 | 71.456 | 54.394 | 59.309 | 0.00 | 0.00 |

|      |       |     |     |      |        |        |        |      |      |
|------|-------|-----|-----|------|--------|--------|--------|------|------|
| ATOM | 16689 | CA  | H22 | 1110 | 69.341 | 54.593 | 59.548 | 0.00 | 0.00 |
| ATOM | 16690 | HA  | H22 | 1110 | 68.489 | 54.456 | 58.882 | 0.00 | 0.00 |
| ATOM | 16691 | CB  | H22 | 1110 | 69.293 | 53.413 | 60.575 | 0.00 | 0.00 |
| ATOM | 16692 | HB2 | H22 | 1110 | 70.254 | 53.428 | 61.089 | 0.00 | 0.00 |
| ATOM | 16693 | HB3 | H22 | 1110 | 68.475 | 53.680 | 61.245 | 0.00 | 0.00 |
| ATOM | 16694 | CG  | H22 | 1110 | 69.236 | 52.046 | 59.916 | 0.00 | 0.00 |
| ATOM | 16695 | ND1 | H22 | 1110 | 68.145 | 51.280 | 59.783 | 0.00 | 0.00 |
| ATOM | 16696 | HD1 | H22 | 1110 | 67.226 | 51.437 | 60.173 | 0.00 | 0.00 |
| ATOM | 16697 | CE1 | H22 | 1110 | 68.482 | 50.133 | 59.261 | 0.00 | 0.00 |
| ATOM | 16698 | HE1 | H22 | 1110 | 67.810 | 49.328 | 59.001 | 0.00 | 0.00 |
| ATOM | 16699 | NE2 | H22 | 1110 | 69.766 | 50.063 | 58.944 | 0.00 | 0.00 |
| ATOM | 16700 | CD2 | H22 | 1110 | 70.307 | 51.305 | 59.436 | 0.00 | 0.00 |
| ATOM | 16701 | HD2 | H22 | 1110 | 71.350 | 51.581 | 59.488 | 0.00 | 0.00 |
| ATOM | 16702 | C   | H22 | 1110 | 69.149 | 55.930 | 60.295 | 0.00 | 0.00 |
| ATOM | 16703 | O   | H22 | 1110 | 69.883 | 56.132 | 61.262 | 0.00 | 0.00 |
| ATOM | 16704 | N   | TRP | 1111 | 68.072 | 56.689 | 60.026 | 0.00 | 0.00 |
| ATOM | 16705 | H   | TRP | 1111 | 67.401 | 56.540 | 59.285 | 0.00 | 0.00 |
| ATOM | 16706 | CA  | TRP | 1111 | 67.811 | 57.840 | 60.874 | 0.00 | 0.00 |
| ATOM | 16707 | HA  | TRP | 1111 | 68.774 | 58.350 | 60.904 | 0.00 | 0.00 |
| ATOM | 16708 | CB  | TRP | 1111 | 66.917 | 58.845 | 60.115 | 0.00 | 0.00 |
| ATOM | 16709 | HB2 | TRP | 1111 | 66.038 | 58.262 | 59.842 | 0.00 | 0.00 |
| ATOM | 16710 | HB3 | TRP | 1111 | 66.667 | 59.618 | 60.841 | 0.00 | 0.00 |
| ATOM | 16711 | CG  | TRP | 1111 | 67.488 | 59.463 | 58.837 | 0.00 | 0.00 |
| ATOM | 16712 | CD1 | TRP | 1111 | 66.994 | 59.312 | 57.598 | 0.00 | 0.00 |
| ATOM | 16713 | HD1 | TRP | 1111 | 66.132 | 58.742 | 57.286 | 0.00 | 0.00 |
| ATOM | 16714 | NE1 | TRP | 1111 | 67.791 | 59.930 | 56.637 | 0.00 | 0.00 |

|      |       |      |     |      |        |        |        |      |      |
|------|-------|------|-----|------|--------|--------|--------|------|------|
| ATOM | 16715 | HE1  | TRP | 1111 | 67.707 | 59.720 | 55.652 | 0.00 | 0.00 |
| ATOM | 16716 | CE2  | TRP | 1111 | 68.900 | 60.504 | 57.210 | 0.00 | 0.00 |
| ATOM | 16717 | CZ2  | TRP | 1111 | 69.925 | 61.285 | 56.577 | 0.00 | 0.00 |
| ATOM | 16718 | HZ2  | TRP | 1111 | 70.016 | 61.500 | 55.522 | 0.00 | 0.00 |
| ATOM | 16719 | CH2  | TRP | 1111 | 70.903 | 61.770 | 57.447 | 0.00 | 0.00 |
| ATOM | 16720 | HH2  | TRP | 1111 | 71.809 | 62.302 | 57.196 | 0.00 | 0.00 |
| ATOM | 16721 | CZ3  | TRP | 1111 | 70.822 | 61.604 | 58.823 | 0.00 | 0.00 |
| ATOM | 16722 | HZ3  | TRP | 1111 | 71.611 | 62.024 | 59.429 | 0.00 | 0.00 |
| ATOM | 16723 | CE3  | TRP | 1111 | 69.833 | 60.807 | 59.414 | 0.00 | 0.00 |
| ATOM | 16724 | HE3  | TRP | 1111 | 69.756 | 60.822 | 60.491 | 0.00 | 0.00 |
| ATOM | 16725 | CD2  | TRP | 1111 | 68.767 | 60.233 | 58.613 | 0.00 | 0.00 |
| ATOM | 16726 | C    | TRP | 1111 | 67.149 | 57.468 | 62.228 | 0.00 | 0.00 |
| ATOM | 16727 | O    | TRP | 1111 | 65.969 | 57.290 | 62.274 | 0.00 | 0.00 |
| ATOM | 16728 | N    | ILE | 1112 | 67.981 | 57.346 | 63.247 | 0.00 | 0.00 |
| ATOM | 16729 | H    | ILE | 1112 | 68.956 | 57.556 | 63.091 | 0.00 | 0.00 |
| ATOM | 16730 | CA   | ILE | 1112 | 67.557 | 56.907 | 64.598 | 0.00 | 0.00 |
| ATOM | 16731 | HA   | ILE | 1112 | 66.529 | 56.545 | 64.593 | 0.00 | 0.00 |
| ATOM | 16732 | CB   | ILE | 1112 | 68.346 | 55.641 | 65.021 | 0.00 | 0.00 |
| ATOM | 16733 | HB   | ILE | 1112 | 69.401 | 55.830 | 64.824 | 0.00 | 0.00 |
| ATOM | 16734 | CG2  | ILE | 1112 | 68.188 | 55.287 | 66.540 | 0.00 | 0.00 |
| ATOM | 16735 | 1HG2 | ILE | 1112 | 68.834 | 54.527 | 66.978 | 0.00 | 0.00 |
| ATOM | 16736 | 2HG2 | ILE | 1112 | 68.334 | 56.169 | 67.164 | 0.00 | 0.00 |
| ATOM | 16737 | 3HG2 | ILE | 1112 | 67.155 | 55.004 | 66.737 | 0.00 | 0.00 |
| ATOM | 16738 | CG1  | ILE | 1112 | 67.936 | 54.426 | 64.139 | 0.00 | 0.00 |
| ATOM | 16739 | 2HG1 | ILE | 1112 | 66.856 | 54.405 | 64.284 | 0.00 | 0.00 |
| ATOM | 16740 | 3HG1 | ILE | 1112 | 68.074 | 54.785 | 63.119 | 0.00 | 0.00 |

|      |       |      |     |      |        |        |        |      |      |
|------|-------|------|-----|------|--------|--------|--------|------|------|
| ATOM | 16741 | CD1  | ILE | 1112 | 68.727 | 53.120 | 64.234 | 0.00 | 0.00 |
| ATOM | 16742 | 1HD1 | ILE | 1112 | 69.659 | 53.233 | 63.680 | 0.00 | 0.00 |
| ATOM | 16743 | 2HD1 | ILE | 1112 | 68.990 | 52.893 | 65.267 | 0.00 | 0.00 |
| ATOM | 16744 | 3HD1 | ILE | 1112 | 68.187 | 52.243 | 63.879 | 0.00 | 0.00 |
| ATOM | 16745 | C    | ILE | 1112 | 67.685 | 58.070 | 65.546 | 0.00 | 0.00 |
| ATOM | 16746 | O    | ILE | 1112 | 66.838 | 58.319 | 66.370 | 0.00 | 0.00 |
| ATOM | 16747 | N    | CYS | 1113 | 68.811 | 58.828 | 65.431 | 0.00 | 0.00 |
| ATOM | 16748 | H    | CYS | 1113 | 69.573 | 58.532 | 64.838 | 0.00 | 0.00 |
| ATOM | 16749 | CA   | CYS | 1113 | 69.040 | 60.024 | 66.361 | 0.00 | 0.00 |
| ATOM | 16750 | HA   | CYS | 1113 | 68.053 | 60.454 | 66.525 | 0.00 | 0.00 |
| ATOM | 16751 | CB   | CYS | 1113 | 69.699 | 59.543 | 67.615 | 0.00 | 0.00 |
| ATOM | 16752 | HB2  | CYS | 1113 | 69.753 | 60.436 | 68.237 | 0.00 | 0.00 |
| ATOM | 16753 | HB3  | CYS | 1113 | 69.147 | 58.730 | 68.086 | 0.00 | 0.00 |
| ATOM | 16754 | SG   | CYS | 1113 | 71.371 | 58.830 | 67.320 | 0.00 | 0.00 |
| ATOM | 16755 | HG   | CYS | 1113 | 72.107 | 59.910 | 67.044 | 0.00 | 0.00 |
| ATOM | 16756 | C    | CYS | 1113 | 69.838 | 61.084 | 65.593 | 0.00 | 0.00 |
| ATOM | 16757 | O    | CYS | 1113 | 70.716 | 60.840 | 64.794 | 0.00 | 0.00 |
| ATOM | 16758 | N    | PRO | 1114 | 69.489 | 62.406 | 65.707 | 0.00 | 0.00 |
| ATOM | 16759 | CD   | PRO | 1114 | 68.515 | 62.796 | 66.655 | 0.00 | 0.00 |
| ATOM | 16760 | HD2  | PRO | 1114 | 67.492 | 62.570 | 66.353 | 0.00 | 0.00 |
| ATOM | 16761 | HD3  | PRO | 1114 | 68.671 | 62.481 | 67.687 | 0.00 | 0.00 |
| ATOM | 16762 | CG   | PRO | 1114 | 68.683 | 64.340 | 66.662 | 0.00 | 0.00 |
| ATOM | 16763 | HG2  | PRO | 1114 | 67.806 | 64.908 | 66.974 | 0.00 | 0.00 |
| ATOM | 16764 | HG3  | PRO | 1114 | 69.451 | 64.592 | 67.394 | 0.00 | 0.00 |
| ATOM | 16765 | CB   | PRO | 1114 | 69.106 | 64.786 | 65.321 | 0.00 | 0.00 |
| ATOM | 16766 | HB2  | PRO | 1114 | 68.241 | 64.975 | 64.686 | 0.00 | 0.00 |



|            |          |      |        |        |        |      |      |
|------------|----------|------|--------|--------|--------|------|------|
| ATOM 16767 | HB3 PRO  | 1114 | 69.583 | 65.763 | 65.393 | 0.00 | 0.00 |
| ATOM 16768 | CA PRO   | 1114 | 69.971 | 63.530 | 64.974 | 0.00 | 0.00 |
| ATOM 16769 | HA PRO   | 1114 | 69.810 | 63.408 | 63.903 | 0.00 | 0.00 |
| ATOM 16770 | C PRO    | 1114 | 71.469 | 63.811 | 65.192 | 0.00 | 0.00 |
| ATOM 16771 | O PRO    | 1114 | 72.068 | 64.561 | 64.480 | 0.00 | 0.00 |
| ATOM 16772 | N GLN    | 1115 | 72.085 | 63.256 | 66.247 | 0.00 | 0.00 |
| ATOM 16773 | H GLN    | 1115 | 71.549 | 62.752 | 66.939 | 0.00 | 0.00 |
| ATOM 16774 | CA GLN   | 1115 | 73.515 | 63.308 | 66.543 | 0.00 | 0.00 |
| ATOM 16775 | HA GLN   | 1115 | 73.856 | 64.330 | 66.374 | 0.00 | 0.00 |
| ATOM 16776 | CB GLN   | 1115 | 73.847 | 62.833 | 67.947 | 0.00 | 0.00 |
| ATOM 16777 | HB2 GLN  | 1115 | 73.500 | 61.808 | 68.073 | 0.00 | 0.00 |
| ATOM 16778 | HB3 GLN  | 1115 | 74.913 | 62.978 | 68.123 | 0.00 | 0.00 |
| ATOM 16779 | CG GLN   | 1115 | 73.046 | 63.710 | 68.961 | 0.00 | 0.00 |
| ATOM 16780 | HG2 GLN  | 1115 | 73.492 | 63.451 | 69.921 | 0.00 | 0.00 |
| ATOM 16781 | HG3 GLN  | 1115 | 73.143 | 64.779 | 68.771 | 0.00 | 0.00 |
| ATOM 16782 | CD GLN   | 1115 | 71.613 | 63.392 | 69.216 | 0.00 | 0.00 |
| ATOM 16783 | OE1 GLN  | 1115 | 71.152 | 62.323 | 68.905 | 0.00 | 0.00 |
| ATOM 16784 | NE2 GLN  | 1115 | 70.796 | 64.321 | 69.667 | 0.00 | 0.00 |
| ATOM 16785 | 1HE2 GLN | 1115 | 69.845 | 63.987 | 69.736 | 0.00 | 0.00 |
| ATOM 16786 | 2HE2 GLN | 1115 | 71.089 | 65.282 | 69.768 | 0.00 | 0.00 |
| ATOM 16787 | C GLN    | 1115 | 74.272 | 62.523 | 65.538 | 0.00 | 0.00 |
| ATOM 16788 | O GLN    | 1115 | 75.428 | 62.750 | 65.386 | 0.00 | 0.00 |
| ATOM 16789 | N GLN    | 1116 | 73.629 | 61.637 | 64.733 | 0.00 | 0.00 |
| ATOM 16790 | H GLN    | 1116 | 72.663 | 61.419 | 64.932 | 0.00 | 0.00 |
| ATOM 16791 | CA GLN   | 1116 | 74.131 | 61.063 | 63.466 | 0.00 | 0.00 |
| ATOM 16792 | HA GLN   | 1116 | 74.949 | 60.353 | 63.593 | 0.00 | 0.00 |

|            |      |     |      |        |        |        |      |      |
|------------|------|-----|------|--------|--------|--------|------|------|
| ATOM 16793 | CB   | GLN | 1116 | 72.999 | 60.173 | 62.869 | 0.00 | 0.00 |
| ATOM 16794 | HB2  | GLN | 1116 | 72.084 | 60.706 | 62.610 | 0.00 | 0.00 |
| ATOM 16795 | HB3  | GLN | 1116 | 73.294 | 59.940 | 61.846 | 0.00 | 0.00 |
| ATOM 16796 | CG   | GLN | 1116 | 72.902 | 58.853 | 63.703 | 0.00 | 0.00 |
| ATOM 16797 | HG2  | GLN | 1116 | 73.854 | 58.352 | 63.530 | 0.00 | 0.00 |
| ATOM 16798 | HG3  | GLN | 1116 | 72.680 | 59.166 | 64.724 | 0.00 | 0.00 |
| ATOM 16799 | CD   | GLN | 1116 | 71.668 | 58.067 | 63.295 | 0.00 | 0.00 |
| ATOM 16800 | OE1  | GLN | 1116 | 70.579 | 58.493 | 62.887 | 0.00 | 0.00 |
| ATOM 16801 | NE2  | GLN | 1116 | 71.784 | 56.805 | 63.375 | 0.00 | 0.00 |
| ATOM 16802 | 1HE2 | GLN | 1116 | 71.189 | 56.242 | 62.784 | 0.00 | 0.00 |
| ATOM 16803 | 2HE2 | GLN | 1116 | 72.625 | 56.411 | 63.772 | 0.00 | 0.00 |
| ATOM 16804 | C    | GLN | 1116 | 74.655 | 62.114 | 62.496 | 0.00 | 0.00 |
| ATOM 16805 | O    | GLN | 1116 | 75.761 | 61.979 | 62.018 | 0.00 | 0.00 |
| ATOM 16806 | N    | ALA | 1117 | 73.945 | 63.226 | 62.301 | 0.00 | 0.00 |
| ATOM 16807 | H    | ALA | 1117 | 73.053 | 63.375 | 62.750 | 0.00 | 0.00 |
| ATOM 16808 | CA   | ALA | 1117 | 74.554 | 64.245 | 61.384 | 0.00 | 0.00 |
| ATOM 16809 | HA   | ALA | 1117 | 74.826 | 63.747 | 60.453 | 0.00 | 0.00 |
| ATOM 16810 | CB   | ALA | 1117 | 73.507 | 65.231 | 61.094 | 0.00 | 0.00 |
| ATOM 16811 | HB1  | ALA | 1117 | 73.070 | 65.691 | 61.980 | 0.00 | 0.00 |
| ATOM 16812 | HB2  | ALA | 1117 | 73.979 | 66.027 | 60.519 | 0.00 | 0.00 |
| ATOM 16813 | HB3  | ALA | 1117 | 72.692 | 64.821 | 60.496 | 0.00 | 0.00 |
| ATOM 16814 | C    | ALA | 1117 | 75.758 | 65.001 | 61.951 | 0.00 | 0.00 |
| ATOM 16815 | O    | ALA | 1117 | 76.251 | 65.898 | 61.264 | 0.00 | 0.00 |
| ATOM 16816 | N    | GLU | 1118 | 76.231 | 64.606 | 63.219 | 0.00 | 0.00 |
| ATOM 16817 | H    | GLU | 1118 | 75.759 | 63.892 | 63.755 | 0.00 | 0.00 |
| ATOM 16818 | CA   | GLU | 1118 | 77.349 | 65.341 | 63.882 | 0.00 | 0.00 |

|            |     |          |        |        |        |      |      |
|------------|-----|----------|--------|--------|--------|------|------|
| ATOM 16819 | HA  | GLU 1118 | 77.737 | 66.178 | 63.301 | 0.00 | 0.00 |
| ATOM 16820 | CB  | GLU 1118 | 76.844 | 65.909 | 65.208 | 0.00 | 0.00 |
| ATOM 16821 | HB2 | GLU 1118 | 76.037 | 66.575 | 64.902 | 0.00 | 0.00 |
| ATOM 16822 | HB3 | GLU 1118 | 76.613 | 65.080 | 65.877 | 0.00 | 0.00 |
| ATOM 16823 | CG  | GLU 1118 | 77.942 | 66.636 | 65.948 | 0.00 | 0.00 |
| ATOM 16824 | HG2 | GLU 1118 | 78.744 | 65.987 | 66.299 | 0.00 | 0.00 |
| ATOM 16825 | HG3 | GLU 1118 | 78.454 | 67.395 | 65.356 | 0.00 | 0.00 |
| ATOM 16826 | CD  | GLU 1118 | 77.388 | 67.378 | 67.120 | 0.00 | 0.00 |
| ATOM 16827 | OE1 | GLU 1118 | 78.193 | 67.783 | 68.029 | 0.00 | 0.00 |
| ATOM 16828 | OE2 | GLU 1118 | 76.154 | 67.474 | 67.349 | 0.00 | 0.00 |
| ATOM 16829 | C   | GLU 1118 | 78.539 | 64.374 | 64.013 | 0.00 | 0.00 |
| ATOM 16830 | O   | GLU 1118 | 79.654 | 64.717 | 63.667 | 0.00 | 0.00 |
| ATOM 16831 | N   | GLU 1119 | 78.375 | 63.144 | 64.528 | 0.00 | 0.00 |
| ATOM 16832 | H   | GLU 1119 | 77.421 | 62.978 | 64.812 | 0.00 | 0.00 |
| ATOM 16833 | CA  | GLU 1119 | 79.316 | 62.120 | 64.840 | 0.00 | 0.00 |
| ATOM 16834 | HA  | GLU 1119 | 79.997 | 62.523 | 65.589 | 0.00 | 0.00 |
| ATOM 16835 | CB  | GLU 1119 | 78.475 | 61.010 | 65.518 | 0.00 | 0.00 |
| ATOM 16836 | HB2 | GLU 1119 | 77.818 | 60.534 | 64.791 | 0.00 | 0.00 |
| ATOM 16837 | HB3 | GLU 1119 | 77.878 | 61.347 | 66.365 | 0.00 | 0.00 |
| ATOM 16838 | CG  | GLU 1119 | 79.424 | 59.916 | 66.064 | 0.00 | 0.00 |
| ATOM 16839 | HG2 | GLU 1119 | 78.814 | 59.039 | 66.280 | 0.00 | 0.00 |
| ATOM 16840 | HG3 | GLU 1119 | 80.111 | 59.511 | 65.320 | 0.00 | 0.00 |
| ATOM 16841 | CD  | GLU 1119 | 80.179 | 60.447 | 67.342 | 0.00 | 0.00 |
| ATOM 16842 | OE1 | GLU 1119 | 81.444 | 60.596 | 67.335 | 0.00 | 0.00 |
| ATOM 16843 | OE2 | GLU 1119 | 79.468 | 60.545 | 68.366 | 0.00 | 0.00 |
| ATOM 16844 | C   | GLU 1119 | 80.063 | 61.579 | 63.592 | 0.00 | 0.00 |

|            |      |     |      |        |        |        |      |      |
|------------|------|-----|------|--------|--------|--------|------|------|
| ATOM 16845 | O    | GLU | 1119 | 81.225 | 61.230 | 63.580 | 0.00 | 0.00 |
| ATOM 16846 | N    | ALA | 1120 | 79.284 | 61.510 | 62.499 | 0.00 | 0.00 |
| ATOM 16847 | H    | ALA | 1120 | 78.302 | 61.743 | 62.549 | 0.00 | 0.00 |
| ATOM 16848 | CA   | ALA | 1120 | 79.940 | 61.265 | 61.223 | 0.00 | 0.00 |
| ATOM 16849 | HA   | ALA | 1120 | 80.850 | 60.691 | 61.397 | 0.00 | 0.00 |
| ATOM 16850 | CB   | ALA | 1120 | 78.979 | 60.596 | 60.312 | 0.00 | 0.00 |
| ATOM 16851 | HB1  | ALA | 1120 | 78.573 | 59.806 | 60.943 | 0.00 | 0.00 |
| ATOM 16852 | HB2  | ALA | 1120 | 78.291 | 61.313 | 59.864 | 0.00 | 0.00 |
| ATOM 16853 | HB3  | ALA | 1120 | 79.534 | 60.151 | 59.486 | 0.00 | 0.00 |
| ATOM 16854 | C    | ALA | 1120 | 80.524 | 62.564 | 60.572 | 0.00 | 0.00 |
| ATOM 16855 | O    | ALA | 1120 | 81.459 | 62.388 | 59.810 | 0.00 | 0.00 |
| ATOM 16856 | N    | LEU | 1121 | 79.973 | 63.765 | 60.903 | 0.00 | 0.00 |
| ATOM 16857 | H    | LEU | 1121 | 79.376 | 63.880 | 61.710 | 0.00 | 0.00 |
| ATOM 16858 | CA   | LEU | 1121 | 80.519 | 64.993 | 60.286 | 0.00 | 0.00 |
| ATOM 16859 | HA   | LEU | 1121 | 80.832 | 64.791 | 59.261 | 0.00 | 0.00 |
| ATOM 16860 | CB   | LEU | 1121 | 79.340 | 65.999 | 60.368 | 0.00 | 0.00 |
| ATOM 16861 | HB2  | LEU | 1121 | 78.440 | 65.438 | 60.114 | 0.00 | 0.00 |
| ATOM 16862 | HB3  | LEU | 1121 | 79.280 | 66.323 | 61.407 | 0.00 | 0.00 |
| ATOM 16863 | CG   | LEU | 1121 | 79.480 | 67.149 | 59.377 | 0.00 | 0.00 |
| ATOM 16864 | HG   | LEU | 1121 | 80.387 | 67.659 | 59.698 | 0.00 | 0.00 |
| ATOM 16865 | CD1  | LEU | 1121 | 79.574 | 66.746 | 57.987 | 0.00 | 0.00 |
| ATOM 16866 | 1HD1 | LEU | 1121 | 80.456 | 66.115 | 57.887 | 0.00 | 0.00 |
| ATOM 16867 | 2HD1 | LEU | 1121 | 78.637 | 66.255 | 57.723 | 0.00 | 0.00 |
| ATOM 16868 | 3HD1 | LEU | 1121 | 79.712 | 67.532 | 57.245 | 0.00 | 0.00 |
| ATOM 16869 | CD2  | LEU | 1121 | 78.427 | 68.199 | 59.700 | 0.00 | 0.00 |
| ATOM 16870 | 1HD2 | LEU | 1121 | 77.469 | 67.682 | 59.746 | 0.00 | 0.00 |

|            |      |     |      |        |        |        |      |      |
|------------|------|-----|------|--------|--------|--------|------|------|
| ATOM 16871 | 2HD2 | LEU | 1121 | 78.725 | 68.662 | 60.641 | 0.00 | 0.00 |
| ATOM 16872 | 3HD2 | LEU | 1121 | 78.343 | 69.003 | 58.969 | 0.00 | 0.00 |
| ATOM 16873 | C    | LEU | 1121 | 81.872 | 65.451 | 60.832 | 0.00 | 0.00 |
| ATOM 16874 | O    | LEU | 1121 | 82.686 | 66.010 | 60.137 | 0.00 | 0.00 |
| ATOM 16875 | N    | VAL | 1122 | 82.203 | 65.158 | 62.128 | 0.00 | 0.00 |
| ATOM 16876 | H    | VAL | 1122 | 81.444 | 64.803 | 62.692 | 0.00 | 0.00 |
| ATOM 16877 | CA   | VAL | 1122 | 83.567 | 65.412 | 62.657 | 0.00 | 0.00 |
| ATOM 16878 | HA   | VAL | 1122 | 83.928 | 66.389 | 62.338 | 0.00 | 0.00 |
| ATOM 16879 | CB   | VAL | 1122 | 83.771 | 65.219 | 64.159 | 0.00 | 0.00 |
| ATOM 16880 | HB   | VAL | 1122 | 84.795 | 65.428 | 64.467 | 0.00 | 0.00 |
| ATOM 16881 | CG1  | VAL | 1122 | 82.913 | 66.154 | 64.963 | 0.00 | 0.00 |
| ATOM 16882 | 1HG1 | VAL | 1122 | 83.200 | 67.190 | 64.780 | 0.00 | 0.00 |
| ATOM 16883 | 2HG1 | VAL | 1122 | 81.860 | 65.948 | 64.775 | 0.00 | 0.00 |
| ATOM 16884 | 3HG1 | VAL | 1122 | 83.061 | 65.952 | 66.024 | 0.00 | 0.00 |
| ATOM 16885 | CG2  | VAL | 1122 | 83.412 | 63.813 | 64.650 | 0.00 | 0.00 |
| ATOM 16886 | 1HG2 | VAL | 1122 | 83.509 | 63.862 | 65.734 | 0.00 | 0.00 |
| ATOM 16887 | 2HG2 | VAL | 1122 | 82.372 | 63.532 | 64.488 | 0.00 | 0.00 |
| ATOM 16888 | 3HG2 | VAL | 1122 | 84.122 | 63.108 | 64.216 | 0.00 | 0.00 |
| ATOM 16889 | C    | VAL | 1122 | 84.546 | 64.464 | 61.898 | 0.00 | 0.00 |
| ATOM 16890 | O    | VAL | 1122 | 85.683 | 64.860 | 61.672 | 0.00 | 0.00 |
| ATOM 16891 | N    | SER | 1123 | 84.114 | 63.287 | 61.536 | 0.00 | 0.00 |
| ATOM 16892 | H    | SER | 1123 | 83.178 | 63.033 | 61.817 | 0.00 | 0.00 |
| ATOM 16893 | CA   | SER | 1123 | 84.825 | 62.166 | 60.852 | 0.00 | 0.00 |
| ATOM 16894 | HA   | SER | 1123 | 85.847 | 62.277 | 61.212 | 0.00 | 0.00 |
| ATOM 16895 | CB   | SER | 1123 | 84.237 | 60.800 | 61.362 | 0.00 | 0.00 |
| ATOM 16896 | HB2  | SER | 1123 | 83.368 | 60.587 | 60.739 | 0.00 | 0.00 |

|            |      |     |      |        |        |        |      |      |
|------------|------|-----|------|--------|--------|--------|------|------|
| ATOM 16897 | HB3  | SER | 1123 | 85.013 | 60.036 | 61.408 | 0.00 | 0.00 |
| ATOM 16898 | OG   | SER | 1123 | 83.787 | 60.879 | 62.739 | 0.00 | 0.00 |
| ATOM 16899 | HG   | SER | 1123 | 82.829 | 60.828 | 62.767 | 0.00 | 0.00 |
| ATOM 16900 | C    | SER | 1123 | 85.000 | 62.314 | 59.327 | 0.00 | 0.00 |
| ATOM 16901 | O    | SER | 1123 | 85.717 | 61.452 | 58.809 | 0.00 | 0.00 |
| ATOM 16902 | N    | GLY | 1124 | 84.447 | 63.408 | 58.644 | 0.00 | 0.00 |
| ATOM 16903 | H    | GLY | 1124 | 83.961 | 64.162 | 59.108 | 0.00 | 0.00 |
| ATOM 16904 | CA   | GLY | 1124 | 84.685 | 63.584 | 57.200 | 0.00 | 0.00 |
| ATOM 16905 | HA2  | GLY | 1124 | 84.539 | 64.634 | 56.946 | 0.00 | 0.00 |
| ATOM 16906 | HA3  | GLY | 1124 | 85.657 | 63.247 | 56.840 | 0.00 | 0.00 |
| ATOM 16907 | C    | GLY | 1124 | 83.697 | 62.920 | 56.227 | 0.00 | 0.00 |
| ATOM 16908 | O    | GLY | 1124 | 83.936 | 62.995 | 55.004 | 0.00 | 0.00 |
| ATOM 16909 | N    | VAL | 1125 | 82.562 | 62.349 | 56.692 | 0.00 | 0.00 |
| ATOM 16910 | H    | VAL | 1125 | 82.411 | 62.164 | 57.674 | 0.00 | 0.00 |
| ATOM 16911 | CA   | VAL | 1125 | 81.392 | 62.157 | 55.842 | 0.00 | 0.00 |
| ATOM 16912 | HA   | VAL | 1125 | 81.665 | 62.022 | 54.795 | 0.00 | 0.00 |
| ATOM 16913 | CB   | VAL | 1125 | 80.470 | 60.965 | 56.451 | 0.00 | 0.00 |
| ATOM 16914 | HB   | VAL | 1125 | 79.963 | 61.353 | 57.335 | 0.00 | 0.00 |
| ATOM 16915 | CG1  | VAL | 1125 | 79.305 | 60.601 | 55.523 | 0.00 | 0.00 |
| ATOM 16916 | 1HG1 | VAL | 1125 | 78.909 | 59.629 | 55.819 | 0.00 | 0.00 |
| ATOM 16917 | 2HG1 | VAL | 1125 | 78.532 | 61.357 | 55.658 | 0.00 | 0.00 |
| ATOM 16918 | 3HG1 | VAL | 1125 | 79.699 | 60.577 | 54.508 | 0.00 | 0.00 |
| ATOM 16919 | CG2  | VAL | 1125 | 81.299 | 59.732 | 56.823 | 0.00 | 0.00 |
| ATOM 16920 | 1HG2 | VAL | 1125 | 81.853 | 59.405 | 55.944 | 0.00 | 0.00 |
| ATOM 16921 | 2HG2 | VAL | 1125 | 82.020 | 59.862 | 57.631 | 0.00 | 0.00 |
| ATOM 16922 | 3HG2 | VAL | 1125 | 80.610 | 58.989 | 57.225 | 0.00 | 0.00 |

|            |      |     |      |        |        |        |      |      |
|------------|------|-----|------|--------|--------|--------|------|------|
| ATOM 16923 | C    | VAL | 1125 | 80.410 | 63.399 | 55.747 | 0.00 | 0.00 |
| ATOM 16924 | O    | VAL | 1125 | 79.871 | 63.788 | 56.780 | 0.00 | 0.00 |
| ATOM 16925 | N    | THR | 1126 | 80.185 | 63.959 | 54.552 | 0.00 | 0.00 |
| ATOM 16926 | H    | THR | 1126 | 80.623 | 63.573 | 53.727 | 0.00 | 0.00 |
| ATOM 16927 | CA   | THR | 1126 | 79.380 | 65.243 | 54.424 | 0.00 | 0.00 |
| ATOM 16928 | HA   | THR | 1126 | 79.046 | 65.765 | 55.321 | 0.00 | 0.00 |
| ATOM 16929 | CB   | THR | 1126 | 80.249 | 66.332 | 53.598 | 0.00 | 0.00 |
| ATOM 16930 | HB   | THR | 1126 | 79.623 | 67.204 | 53.404 | 0.00 | 0.00 |
| ATOM 16931 | CG2  | THR | 1126 | 81.545 | 66.900 | 54.193 | 0.00 | 0.00 |
| ATOM 16932 | 1HG2 | THR | 1126 | 81.428 | 67.274 | 55.210 | 0.00 | 0.00 |
| ATOM 16933 | 2HG2 | THR | 1126 | 82.284 | 66.100 | 54.235 | 0.00 | 0.00 |
| ATOM 16934 | 3HG2 | THR | 1126 | 81.913 | 67.766 | 53.644 | 0.00 | 0.00 |
| ATOM 16935 | OG1  | THR | 1126 | 80.600 | 65.811 | 52.326 | 0.00 | 0.00 |
| ATOM 16936 | HG1  | THR | 1126 | 80.740 | 66.564 | 51.746 | 0.00 | 0.00 |
| ATOM 16937 | C    | THR | 1126 | 78.070 | 65.154 | 53.724 | 0.00 | 0.00 |
| ATOM 16938 | O    | THR | 1126 | 77.206 | 66.061 | 53.918 | 0.00 | 0.00 |
| ATOM 16939 | N    | THR | 1127 | 77.848 | 64.030 | 53.013 | 0.00 | 0.00 |
| ATOM 16940 | H    | THR | 1127 | 78.551 | 63.310 | 52.929 | 0.00 | 0.00 |
| ATOM 16941 | CA   | THR | 1127 | 76.601 | 63.734 | 52.292 | 0.00 | 0.00 |
| ATOM 16942 | HA   | THR | 1127 | 75.823 | 64.485 | 52.425 | 0.00 | 0.00 |
| ATOM 16943 | CB   | THR | 1127 | 76.724 | 63.641 | 50.786 | 0.00 | 0.00 |
| ATOM 16944 | HB   | THR | 1127 | 77.431 | 62.873 | 50.473 | 0.00 | 0.00 |
| ATOM 16945 | CG2  | THR | 1127 | 75.498 | 63.384 | 49.926 | 0.00 | 0.00 |
| ATOM 16946 | 1HG2 | THR | 1127 | 74.661 | 63.958 | 50.324 | 0.00 | 0.00 |
| ATOM 16947 | 2HG2 | THR | 1127 | 75.726 | 63.710 | 48.911 | 0.00 | 0.00 |
| ATOM 16948 | 3HG2 | THR | 1127 | 75.223 | 62.330 | 49.896 | 0.00 | 0.00 |

|            |              |        |        |        |      |      |
|------------|--------------|--------|--------|--------|------|------|
| ATOM 16949 | OG1 THR 1127 | 77.306 | 64.855 | 50.302 | 0.00 | 0.00 |
| ATOM 16950 | HG1 THR 1127 | 78.169 | 64.953 | 50.711 | 0.00 | 0.00 |
| ATOM 16951 | C THR 1127   | 76.154 | 62.425 | 52.871 | 0.00 | 0.00 |
| ATOM 16952 | O THR 1127   | 76.950 | 61.555 | 53.197 | 0.00 | 0.00 |
| ATOM 16953 | N MET 1128   | 74.848 | 62.256 | 52.924 | 0.00 | 0.00 |
| ATOM 16954 | H MET 1128   | 74.236 | 62.980 | 52.575 | 0.00 | 0.00 |
| ATOM 16955 | CA MET 1128  | 74.175 | 61.134 | 53.463 | 0.00 | 0.00 |
| ATOM 16956 | HA MET 1128  | 74.828 | 60.261 | 53.464 | 0.00 | 0.00 |
| ATOM 16957 | CB MET 1128  | 73.719 | 61.386 | 54.887 | 0.00 | 0.00 |
| ATOM 16958 | HB2 MET 1128 | 73.041 | 62.239 | 54.934 | 0.00 | 0.00 |
| ATOM 16959 | HB3 MET 1128 | 73.117 | 60.579 | 55.304 | 0.00 | 0.00 |
| ATOM 16960 | CG MET 1128  | 74.830 | 61.608 | 55.826 | 0.00 | 0.00 |
| ATOM 16961 | HG2 MET 1128 | 75.498 | 60.795 | 55.541 | 0.00 | 0.00 |
| ATOM 16962 | HG3 MET 1128 | 75.297 | 62.546 | 55.526 | 0.00 | 0.00 |
| ATOM 16963 | SD MET 1128  | 74.589 | 61.603 | 57.569 | 0.00 | 0.00 |
| ATOM 16964 | CE MET 1128  | 76.296 | 61.580 | 58.180 | 0.00 | 0.00 |
| ATOM 16965 | HE1 MET 1128 | 76.877 | 60.728 | 57.828 | 0.00 | 0.00 |
| ATOM 16966 | HE2 MET 1128 | 76.833 | 62.463 | 57.832 | 0.00 | 0.00 |
| ATOM 16967 | HE3 MET 1128 | 76.199 | 61.573 | 59.266 | 0.00 | 0.00 |
| ATOM 16968 | C MET 1128   | 72.974 | 60.716 | 52.543 | 0.00 | 0.00 |
| ATOM 16969 | O MET 1128   | 72.273 | 61.624 | 52.090 | 0.00 | 0.00 |
| ATOM 16970 | N VAL 1129   | 72.865 | 59.396 | 52.366 | 0.00 | 0.00 |
| ATOM 16971 | H VAL 1129   | 73.595 | 58.740 | 52.603 | 0.00 | 0.00 |
| ATOM 16972 | CA VAL 1129  | 71.602 | 58.845 | 51.838 | 0.00 | 0.00 |
| ATOM 16973 | HA VAL 1129  | 70.921 | 59.696 | 51.846 | 0.00 | 0.00 |
| ATOM 16974 | CB VAL 1129  | 71.610 | 58.280 | 50.421 | 0.00 | 0.00 |



|            |      |     |      |        |        |        |      |      |
|------------|------|-----|------|--------|--------|--------|------|------|
| ATOM 16975 | HB   | VAL | 1129 | 72.187 | 57.361 | 50.523 | 0.00 | 0.00 |
| ATOM 16976 | CG1  | VAL | 1129 | 70.177 | 57.939 | 49.879 | 0.00 | 0.00 |
| ATOM 16977 | 1HG1 | VAL | 1129 | 69.520 | 58.778 | 50.108 | 0.00 | 0.00 |
| ATOM 16978 | 2HG1 | VAL | 1129 | 70.134 | 57.705 | 48.815 | 0.00 | 0.00 |
| ATOM 16979 | 3HG1 | VAL | 1129 | 69.737 | 57.053 | 50.335 | 0.00 | 0.00 |
| ATOM 16980 | CG2  | VAL | 1129 | 72.253 | 59.176 | 49.398 | 0.00 | 0.00 |
| ATOM 16981 | 1HG2 | VAL | 1129 | 73.238 | 59.453 | 49.772 | 0.00 | 0.00 |
| ATOM 16982 | 2HG2 | VAL | 1129 | 72.384 | 58.656 | 48.449 | 0.00 | 0.00 |
| ATOM 16983 | 3HG2 | VAL | 1129 | 71.673 | 60.090 | 49.274 | 0.00 | 0.00 |
| ATOM 16984 | C    | VAL | 1129 | 71.180 | 57.871 | 52.880 | 0.00 | 0.00 |
| ATOM 16985 | O    | VAL | 1129 | 72.013 | 57.087 | 53.343 | 0.00 | 0.00 |
| ATOM 16986 | N    | GLY | 1130 | 69.900 | 57.930 | 53.326 | 0.00 | 0.00 |
| ATOM 16987 | H    | GLY | 1130 | 69.336 | 58.689 | 52.969 | 0.00 | 0.00 |
| ATOM 16988 | CA   | GLY | 1130 | 69.412 | 57.247 | 54.578 | 0.00 | 0.00 |
| ATOM 16989 | HA2  | GLY | 1130 | 69.783 | 56.223 | 54.589 | 0.00 | 0.00 |
| ATOM 16990 | HA3  | GLY | 1130 | 69.916 | 57.723 | 55.419 | 0.00 | 0.00 |
| ATOM 16991 | C    | GLY | 1130 | 67.924 | 57.284 | 54.668 | 0.00 | 0.00 |
| ATOM 16992 | O    | GLY | 1130 | 67.306 | 58.092 | 53.988 | 0.00 | 0.00 |
| ATOM 16993 | N    | GLY | 1131 | 67.333 | 56.396 | 55.540 | 0.00 | 0.00 |
| ATOM 16994 | H    | GLY | 1131 | 68.022 | 55.872 | 56.059 | 0.00 | 0.00 |
| ATOM 16995 | CA   | GLY | 1131 | 65.937 | 56.377 | 55.963 | 0.00 | 0.00 |
| ATOM 16996 | HA2  | GLY | 1131 | 65.435 | 55.596 | 55.392 | 0.00 | 0.00 |
| ATOM 16997 | HA3  | GLY | 1131 | 65.341 | 57.198 | 55.564 | 0.00 | 0.00 |
| ATOM 16998 | C    | GLY | 1131 | 65.646 | 56.030 | 57.391 | 0.00 | 0.00 |
| ATOM 16999 | O    | GLY | 1131 | 66.347 | 55.202 | 57.928 | 0.00 | 0.00 |
| ATOM 17000 | N    | GLY | 1132 | 64.691 | 56.678 | 58.028 | 0.00 | 0.00 |

|            |      |          |        |        |        |      |      |
|------------|------|----------|--------|--------|--------|------|------|
| ATOM 17001 | H    | GLY 1132 | 64.254 | 57.463 | 57.568 | 0.00 | 0.00 |
| ATOM 17002 | CA   | GLY 1132 | 64.055 | 56.411 | 59.334 | 0.00 | 0.00 |
| ATOM 17003 | HA2  | GLY 1132 | 63.228 | 55.742 | 59.095 | 0.00 | 0.00 |
| ATOM 17004 | HA3  | GLY 1132 | 64.792 | 55.917 | 59.966 | 0.00 | 0.00 |
| ATOM 17005 | C    | GLY 1132 | 63.367 | 57.643 | 59.920 | 0.00 | 0.00 |
| ATOM 17006 | O    | GLY 1132 | 63.040 | 58.586 | 59.230 | 0.00 | 0.00 |
| ATOM 17007 | N    | THR 1133 | 62.962 | 57.579 | 61.225 | 0.00 | 0.00 |
| ATOM 17008 | H    | THR 1133 | 63.099 | 56.698 | 61.701 | 0.00 | 0.00 |
| ATOM 17009 | CA   | THR 1133 | 61.939 | 58.423 | 61.864 | 0.00 | 0.00 |
| ATOM 17010 | HA   | THR 1133 | 61.671 | 59.277 | 61.241 | 0.00 | 0.00 |
| ATOM 17011 | CB   | THR 1133 | 60.640 | 57.630 | 61.957 | 0.00 | 0.00 |
| ATOM 17012 | HB   | THR 1133 | 59.893 | 58.333 | 62.326 | 0.00 | 0.00 |
| ATOM 17013 | CG2  | THR 1133 | 60.134 | 57.188 | 60.524 | 0.00 | 0.00 |
| ATOM 17014 | 1HG2 | THR 1133 | 60.589 | 56.274 | 60.144 | 0.00 | 0.00 |
| ATOM 17015 | 2HG2 | THR 1133 | 59.073 | 56.946 | 60.586 | 0.00 | 0.00 |
| ATOM 17016 | 3HG2 | THR 1133 | 60.194 | 57.983 | 59.781 | 0.00 | 0.00 |
| ATOM 17017 | OG1  | THR 1133 | 60.711 | 56.567 | 62.835 | 0.00 | 0.00 |
| ATOM 17018 | HG1  | THR 1133 | 60.454 | 55.762 | 62.380 | 0.00 | 0.00 |
| ATOM 17019 | C    | THR 1133 | 62.413 | 58.879 | 63.187 | 0.00 | 0.00 |
| ATOM 17020 | O    | THR 1133 | 62.010 | 59.910 | 63.692 | 0.00 | 0.00 |
| ATOM 17021 | N    | GLY 1134 | 63.293 | 58.086 | 63.801 | 0.00 | 0.00 |
| ATOM 17022 | H    | GLY 1134 | 63.542 | 57.195 | 63.397 | 0.00 | 0.00 |
| ATOM 17023 | CA   | GLY 1134 | 63.788 | 58.309 | 65.111 | 0.00 | 0.00 |
| ATOM 17024 | HA2  | GLY 1134 | 64.778 | 58.733 | 64.947 | 0.00 | 0.00 |
| ATOM 17025 | HA3  | GLY 1134 | 63.233 | 59.012 | 65.732 | 0.00 | 0.00 |
| ATOM 17026 | C    | GLY 1134 | 63.895 | 56.865 | 65.861 | 0.00 | 0.00 |

|            |     |     |      |        |        |        |      |      |
|------------|-----|-----|------|--------|--------|--------|------|------|
| ATOM 17027 | O   | GLY | 1134 | 64.142 | 55.865 | 65.181 | 0.00 | 0.00 |
| ATOM 17028 | N   | PRO | 1135 | 63.660 | 56.849 | 67.151 | 0.00 | 0.00 |
| ATOM 17029 | CD  | PRO | 1135 | 63.604 | 57.971 | 68.120 | 0.00 | 0.00 |
| ATOM 17030 | HD2 | PRO | 1135 | 64.418 | 58.654 | 67.878 | 0.00 | 0.00 |
| ATOM 17031 | HD3 | PRO | 1135 | 62.636 | 58.469 | 68.047 | 0.00 | 0.00 |
| ATOM 17032 | CG  | PRO | 1135 | 63.686 | 57.247 | 69.492 | 0.00 | 0.00 |
| ATOM 17033 | HG2 | PRO | 1135 | 64.436 | 57.734 | 70.115 | 0.00 | 0.00 |
| ATOM 17034 | HG3 | PRO | 1135 | 62.716 | 57.253 | 69.990 | 0.00 | 0.00 |
| ATOM 17035 | CB  | PRO | 1135 | 64.236 | 55.831 | 69.227 | 0.00 | 0.00 |
| ATOM 17036 | HB2 | PRO | 1135 | 65.318 | 55.961 | 69.204 | 0.00 | 0.00 |
| ATOM 17037 | HB3 | PRO | 1135 | 63.859 | 55.145 | 69.987 | 0.00 | 0.00 |
| ATOM 17038 | CA  | PRO | 1135 | 63.799 | 55.512 | 67.839 | 0.00 | 0.00 |
| ATOM 17039 | HA  | PRO | 1135 | 64.614 | 54.956 | 67.376 | 0.00 | 0.00 |
| ATOM 17040 | C   | PRO | 1135 | 62.464 | 54.732 | 67.788 | 0.00 | 0.00 |
| ATOM 17041 | O   | PRO | 1135 | 61.866 | 54.438 | 68.845 | 0.00 | 0.00 |
| ATOM 17042 | N   | ALA | 1136 | 61.944 | 54.445 | 66.613 | 0.00 | 0.00 |
| ATOM 17043 | H   | ALA | 1136 | 62.528 | 54.730 | 65.840 | 0.00 | 0.00 |
| ATOM 17044 | CA  | ALA | 1136 | 60.751 | 53.600 | 66.343 | 0.00 | 0.00 |
| ATOM 17045 | HA  | ALA | 1136 | 60.334 | 53.349 | 67.318 | 0.00 | 0.00 |
| ATOM 17046 | CB  | ALA | 1136 | 59.764 | 54.371 | 65.520 | 0.00 | 0.00 |
| ATOM 17047 | HB1 | ALA | 1136 | 59.473 | 55.259 | 66.082 | 0.00 | 0.00 |
| ATOM 17048 | HB2 | ALA | 1136 | 60.223 | 54.741 | 64.602 | 0.00 | 0.00 |
| ATOM 17049 | HB3 | ALA | 1136 | 58.800 | 53.890 | 65.357 | 0.00 | 0.00 |
| ATOM 17050 | C   | ALA | 1136 | 61.076 | 52.315 | 65.597 | 0.00 | 0.00 |
| ATOM 17051 | O   | ALA | 1136 | 62.064 | 52.334 | 64.866 | 0.00 | 0.00 |
| ATOM 17052 | N   | ALA | 1137 | 60.268 | 51.300 | 65.746 | 0.00 | 0.00 |

|      |       |      |     |      |        |        |        |      |      |
|------|-------|------|-----|------|--------|--------|--------|------|------|
| ATOM | 17053 | H    | ALA | 1137 | 59.321 | 51.564 | 65.977 | 0.00 | 0.00 |
| ATOM | 17054 | CA   | ALA | 1137 | 60.589 | 49.894 | 65.551 | 0.00 | 0.00 |
| ATOM | 17055 | HA   | ALA | 1137 | 61.420 | 49.571 | 66.178 | 0.00 | 0.00 |
| ATOM | 17056 | CB   | ALA | 1137 | 59.331 | 49.035 | 65.814 | 0.00 | 0.00 |
| ATOM | 17057 | HB1  | ALA | 1137 | 59.702 | 48.027 | 66.002 | 0.00 | 0.00 |
| ATOM | 17058 | HB2  | ALA | 1137 | 58.827 | 49.362 | 66.724 | 0.00 | 0.00 |
| ATOM | 17059 | HB3  | ALA | 1137 | 58.616 | 49.008 | 64.992 | 0.00 | 0.00 |
| ATOM | 17060 | C    | ALA | 1137 | 60.962 | 49.418 | 64.074 | 0.00 | 0.00 |
| ATOM | 17061 | O    | ALA | 1137 | 61.875 | 48.614 | 63.885 | 0.00 | 0.00 |
| ATOM | 17062 | N    | GLY | 1138 | 60.291 | 50.000 | 63.079 | 0.00 | 0.00 |
| ATOM | 17063 | H    | GLY | 1138 | 59.602 | 50.694 | 63.333 | 0.00 | 0.00 |
| ATOM | 17064 | CA   | GLY | 1138 | 60.419 | 49.749 | 61.670 | 0.00 | 0.00 |
| ATOM | 17065 | HA2  | GLY | 1138 | 60.306 | 48.704 | 61.379 | 0.00 | 0.00 |
| ATOM | 17066 | HA3  | GLY | 1138 | 59.711 | 50.351 | 61.100 | 0.00 | 0.00 |
| ATOM | 17067 | C    | GLY | 1138 | 61.721 | 50.309 | 61.150 | 0.00 | 0.00 |
| ATOM | 17068 | O    | GLY | 1138 | 62.521 | 49.683 | 60.400 | 0.00 | 0.00 |
| ATOM | 17069 | N    | THR | 1139 | 61.953 | 51.521 | 61.571 | 0.00 | 0.00 |
| ATOM | 17070 | H    | THR | 1139 | 61.228 | 51.874 | 62.180 | 0.00 | 0.00 |
| ATOM | 17071 | CA   | THR | 1139 | 63.153 | 52.345 | 61.264 | 0.00 | 0.00 |
| ATOM | 17072 | HA   | THR | 1139 | 63.301 | 52.487 | 60.193 | 0.00 | 0.00 |
| ATOM | 17073 | CB   | THR | 1139 | 62.906 | 53.799 | 61.823 | 0.00 | 0.00 |
| ATOM | 17074 | HB   | THR | 1139 | 62.224 | 53.850 | 62.672 | 0.00 | 0.00 |
| ATOM | 17075 | CG2  | THR | 1139 | 64.253 | 54.381 | 62.335 | 0.00 | 0.00 |
| ATOM | 17076 | 1HG2 | THR | 1139 | 65.018 | 54.219 | 61.576 | 0.00 | 0.00 |
| ATOM | 17077 | 2HG2 | THR | 1139 | 64.138 | 55.445 | 62.537 | 0.00 | 0.00 |
| ATOM | 17078 | 3HG2 | THR | 1139 | 64.430 | 53.915 | 63.304 | 0.00 | 0.00 |

|      |       |     |     |      |        |        |        |      |      |
|------|-------|-----|-----|------|--------|--------|--------|------|------|
| ATOM | 17079 | OG1 | THR | 1139 | 62.231 | 54.665 | 60.951 | 0.00 | 0.00 |
| ATOM | 17080 | HG1 | THR | 1139 | 61.298 | 54.444 | 60.987 | 0.00 | 0.00 |
| ATOM | 17081 | C   | THR | 1139 | 64.379 | 51.690 | 61.900 | 0.00 | 0.00 |
| ATOM | 17082 | O   | THR | 1139 | 65.505 | 51.680 | 61.391 | 0.00 | 0.00 |
| ATOM | 17083 | N   | HIE | 1140 | 64.182 | 51.125 | 63.102 | 0.00 | 0.00 |
| ATOM | 17084 | H   | HIE | 1140 | 63.226 | 50.997 | 63.403 | 0.00 | 0.00 |
| ATOM | 17085 | CA  | HIE | 1140 | 65.184 | 50.420 | 63.854 | 0.00 | 0.00 |
| ATOM | 17086 | HA  | HIE | 1140 | 66.050 | 51.072 | 63.963 | 0.00 | 0.00 |
| ATOM | 17087 | CB  | HIE | 1140 | 64.576 | 50.142 | 65.274 | 0.00 | 0.00 |
| ATOM | 17088 | HB2 | HIE | 1140 | 63.503 | 49.967 | 65.199 | 0.00 | 0.00 |
| ATOM | 17089 | HB3 | HIE | 1140 | 64.965 | 49.208 | 65.679 | 0.00 | 0.00 |
| ATOM | 17090 | CG  | HIE | 1140 | 64.779 | 51.139 | 66.436 | 0.00 | 0.00 |
| ATOM | 17091 | ND1 | HIE | 1140 | 63.973 | 51.280 | 67.623 | 0.00 | 0.00 |
| ATOM | 17092 | CE1 | HIE | 1140 | 64.495 | 52.260 | 68.315 | 0.00 | 0.00 |
| ATOM | 17093 | HE1 | HIE | 1140 | 64.106 | 52.571 | 69.273 | 0.00 | 0.00 |
| ATOM | 17094 | NE2 | HIE | 1140 | 65.599 | 52.728 | 67.740 | 0.00 | 0.00 |
| ATOM | 17095 | HE2 | HIE | 1140 | 66.213 | 53.411 | 68.161 | 0.00 | 0.00 |
| ATOM | 17096 | CD2 | HIE | 1140 | 65.727 | 52.100 | 66.497 | 0.00 | 0.00 |
| ATOM | 17097 | HD2 | HIE | 1140 | 66.588 | 52.073 | 65.846 | 0.00 | 0.00 |
| ATOM | 17098 | C   | HIE | 1140 | 65.781 | 49.180 | 63.186 | 0.00 | 0.00 |
| ATOM | 17099 | O   | HIE | 1140 | 66.944 | 48.914 | 63.311 | 0.00 | 0.00 |
| ATOM | 17100 | N   | ALA | 1141 | 64.913 | 48.441 | 62.473 | 0.00 | 0.00 |
| ATOM | 17101 | H   | ALA | 1141 | 63.922 | 48.542 | 62.635 | 0.00 | 0.00 |
| ATOM | 17102 | CA  | ALA | 1141 | 65.412 | 47.298 | 61.690 | 0.00 | 0.00 |
| ATOM | 17103 | HA  | ALA | 1141 | 66.313 | 46.848 | 62.107 | 0.00 | 0.00 |
| ATOM | 17104 | CB  | ALA | 1141 | 64.342 | 46.157 | 61.661 | 0.00 | 0.00 |

|      |       |      |     |      |        |        |        |      |      |
|------|-------|------|-----|------|--------|--------|--------|------|------|
| ATOM | 17105 | HB1  | ALA | 1141 | 64.187 | 46.023 | 62.732 | 0.00 | 0.00 |
| ATOM | 17106 | HB2  | ALA | 1141 | 63.471 | 46.548 | 61.136 | 0.00 | 0.00 |
| ATOM | 17107 | HB3  | ALA | 1141 | 64.742 | 45.275 | 61.160 | 0.00 | 0.00 |
| ATOM | 17108 | C    | ALA | 1141 | 65.843 | 47.676 | 60.267 | 0.00 | 0.00 |
| ATOM | 17109 | O    | ALA | 1141 | 66.690 | 46.946 | 59.755 | 0.00 | 0.00 |
| ATOM | 17110 | N    | THR | 1142 | 65.203 | 48.726 | 59.718 | 0.00 | 0.00 |
| ATOM | 17111 | H    | THR | 1142 | 64.619 | 49.321 | 60.288 | 0.00 | 0.00 |
| ATOM | 17112 | CA   | THR | 1142 | 65.300 | 49.231 | 58.306 | 0.00 | 0.00 |
| ATOM | 17113 | HA   | THR | 1142 | 66.096 | 48.634 | 57.860 | 0.00 | 0.00 |
| ATOM | 17114 | CB   | THR | 1142 | 64.043 | 48.787 | 57.474 | 0.00 | 0.00 |
| ATOM | 17115 | HB   | THR | 1142 | 64.333 | 48.798 | 56.424 | 0.00 | 0.00 |
| ATOM | 17116 | CG2  | THR | 1142 | 63.490 | 47.406 | 57.907 | 0.00 | 0.00 |
| ATOM | 17117 | 1HG2 | THR | 1142 | 62.704 | 47.478 | 58.660 | 0.00 | 0.00 |
| ATOM | 17118 | 2HG2 | THR | 1142 | 62.971 | 46.991 | 57.043 | 0.00 | 0.00 |
| ATOM | 17119 | 3HG2 | THR | 1142 | 64.278 | 46.734 | 58.248 | 0.00 | 0.00 |
| ATOM | 17120 | OG1  | THR | 1142 | 62.977 | 49.733 | 57.647 | 0.00 | 0.00 |
| ATOM | 17121 | HG1  | THR | 1142 | 62.954 | 49.895 | 58.593 | 0.00 | 0.00 |
| ATOM | 17122 | C    | THR | 1142 | 65.560 | 50.669 | 57.961 | 0.00 | 0.00 |
| ATOM | 17123 | O    | THR | 1142 | 65.219 | 51.543 | 58.694 | 0.00 | 0.00 |
| ATOM | 17124 | N    | THR | 1143 | 66.193 | 50.887 | 56.799 | 0.00 | 0.00 |
| ATOM | 17125 | H    | THR | 1143 | 66.340 | 50.068 | 56.226 | 0.00 | 0.00 |
| ATOM | 17126 | CA   | THR | 1143 | 66.612 | 52.182 | 56.285 | 0.00 | 0.00 |
| ATOM | 17127 | HA   | THR | 1143 | 66.568 | 52.887 | 57.115 | 0.00 | 0.00 |
| ATOM | 17128 | CB   | THR | 1143 | 67.996 | 52.140 | 55.548 | 0.00 | 0.00 |
| ATOM | 17129 | HB   | THR | 1143 | 67.802 | 52.023 | 54.481 | 0.00 | 0.00 |
| ATOM | 17130 | CG2  | THR | 1143 | 68.894 | 53.335 | 55.884 | 0.00 | 0.00 |

|      |       |      |     |      |        |        |        |      |      |
|------|-------|------|-----|------|--------|--------|--------|------|------|
| ATOM | 17131 | 1HG2 | THR | 1143 | 69.943 | 53.069 | 55.750 | 0.00 | 0.00 |
| ATOM | 17132 | 2HG2 | THR | 1143 | 68.773 | 54.116 | 55.133 | 0.00 | 0.00 |
| ATOM | 17133 | 3HG2 | THR | 1143 | 68.574 | 53.799 | 56.817 | 0.00 | 0.00 |
| ATOM | 17134 | OG1  | THR | 1143 | 68.560 | 50.964 | 55.822 | 0.00 | 0.00 |
| ATOM | 17135 | HG1  | THR | 1143 | 69.409 | 51.169 | 56.221 | 0.00 | 0.00 |
| ATOM | 17136 | C    | THR | 1143 | 65.552 | 52.778 | 55.351 | 0.00 | 0.00 |
| ATOM | 17137 | O    | THR | 1143 | 65.846 | 53.306 | 54.291 | 0.00 | 0.00 |
| ATOM | 17138 | N    | CYS | 1144 | 64.327 | 52.701 | 55.772 | 0.00 | 0.00 |
| ATOM | 17139 | H    | CYS | 1144 | 64.199 | 52.436 | 56.738 | 0.00 | 0.00 |
| ATOM | 17140 | CA   | CYS | 1144 | 63.215 | 52.931 | 54.953 | 0.00 | 0.00 |
| ATOM | 17141 | HA   | CYS | 1144 | 63.575 | 53.211 | 53.963 | 0.00 | 0.00 |
| ATOM | 17142 | CB   | CYS | 1144 | 62.467 | 51.614 | 54.685 | 0.00 | 0.00 |
| ATOM | 17143 | HB2  | CYS | 1144 | 62.365 | 51.046 | 55.609 | 0.00 | 0.00 |
| ATOM | 17144 | HB3  | CYS | 1144 | 61.502 | 51.914 | 54.278 | 0.00 | 0.00 |
| ATOM | 17145 | SG   | CYS | 1144 | 63.468 | 50.499 | 53.657 | 0.00 | 0.00 |
| ATOM | 17146 | HG   | CYS | 1144 | 63.676 | 51.236 | 52.562 | 0.00 | 0.00 |
| ATOM | 17147 | C    | CYS | 1144 | 62.329 | 53.949 | 55.683 | 0.00 | 0.00 |
| ATOM | 17148 | O    | CYS | 1144 | 61.605 | 53.565 | 56.614 | 0.00 | 0.00 |
| ATOM | 17149 | N    | THR | 1145 | 62.269 | 55.203 | 55.232 | 0.00 | 0.00 |
| ATOM | 17150 | H    | THR | 1145 | 62.841 | 55.484 | 54.449 | 0.00 | 0.00 |
| ATOM | 17151 | CA   | THR | 1145 | 61.254 | 56.187 | 55.763 | 0.00 | 0.00 |
| ATOM | 17152 | HA   | THR | 1145 | 61.431 | 56.177 | 56.839 | 0.00 | 0.00 |
| ATOM | 17153 | CB   | THR | 1145 | 61.689 | 57.642 | 55.389 | 0.00 | 0.00 |
| ATOM | 17154 | HB   | THR | 1145 | 61.332 | 57.933 | 54.401 | 0.00 | 0.00 |
| ATOM | 17155 | CG2  | THR | 1145 | 61.135 | 58.706 | 56.326 | 0.00 | 0.00 |
| ATOM | 17156 | 1HG2 | THR | 1145 | 60.047 | 58.689 | 56.257 | 0.00 | 0.00 |

|      |       |      |     |      |        |        |        |      |      |
|------|-------|------|-----|------|--------|--------|--------|------|------|
| ATOM | 17157 | 2HG2 | THR | 1145 | 61.600 | 58.666 | 57.311 | 0.00 | 0.00 |
| ATOM | 17158 | 3HG2 | THR | 1145 | 61.373 | 59.673 | 55.882 | 0.00 | 0.00 |
| ATOM | 17159 | OG1  | THR | 1145 | 63.098 | 57.912 | 55.404 | 0.00 | 0.00 |
| ATOM | 17160 | HG1  | THR | 1145 | 63.482 | 57.483 | 54.636 | 0.00 | 0.00 |
| ATOM | 17161 | C    | THR | 1145 | 59.791 | 55.840 | 55.384 | 0.00 | 0.00 |
| ATOM | 17162 | O    | THR | 1145 | 59.544 | 55.700 | 54.141 | 0.00 | 0.00 |
| ATOM | 17163 | N    | PRO | 1146 | 58.827 | 55.603 | 56.285 | 0.00 | 0.00 |
| ATOM | 17164 | CD   | PRO | 1146 | 58.937 | 55.401 | 57.710 | 0.00 | 0.00 |
| ATOM | 17165 | HD2  | PRO | 1146 | 58.542 | 56.246 | 58.274 | 0.00 | 0.00 |
| ATOM | 17166 | HD3  | PRO | 1146 | 59.932 | 55.272 | 58.137 | 0.00 | 0.00 |
| ATOM | 17167 | CG   | PRO | 1146 | 58.145 | 54.201 | 57.944 | 0.00 | 0.00 |
| ATOM | 17168 | HG2  | PRO | 1146 | 58.616 | 53.327 | 57.495 | 0.00 | 0.00 |
| ATOM | 17169 | HG3  | PRO | 1146 | 58.013 | 54.063 | 59.017 | 0.00 | 0.00 |
| ATOM | 17170 | CB   | PRO | 1146 | 56.856 | 54.560 | 57.194 | 0.00 | 0.00 |
| ATOM | 17171 | HB2  | PRO | 1146 | 56.291 | 53.667 | 56.927 | 0.00 | 0.00 |
| ATOM | 17172 | HB3  | PRO | 1146 | 56.279 | 55.273 | 57.782 | 0.00 | 0.00 |
| ATOM | 17173 | CA   | PRO | 1146 | 57.491 | 55.226 | 55.944 | 0.00 | 0.00 |
| ATOM | 17174 | HA   | PRO | 1146 | 57.670 | 54.426 | 55.226 | 0.00 | 0.00 |
| ATOM | 17175 | C    | PRO | 1146 | 56.668 | 56.322 | 55.367 | 0.00 | 0.00 |
| ATOM | 17176 | O    | PRO | 1146 | 56.355 | 57.284 | 56.005 | 0.00 | 0.00 |
| ATOM | 17177 | N    | GLY | 1147 | 56.234 | 56.247 | 54.087 | 0.00 | 0.00 |
| ATOM | 17178 | H    | GLY | 1147 | 56.365 | 55.386 | 53.575 | 0.00 | 0.00 |
| ATOM | 17179 | CA   | GLY | 1147 | 55.014 | 56.987 | 53.724 | 0.00 | 0.00 |
| ATOM | 17180 | HA2  | GLY | 1147 | 54.461 | 56.494 | 52.924 | 0.00 | 0.00 |
| ATOM | 17181 | HA3  | GLY | 1147 | 54.352 | 56.997 | 54.590 | 0.00 | 0.00 |
| ATOM | 17182 | C    | GLY | 1147 | 55.136 | 58.500 | 53.530 | 0.00 | 0.00 |



|            |     |          |        |        |        |      |      |
|------------|-----|----------|--------|--------|--------|------|------|
| ATOM 17183 | O   | GLY 1147 | 56.088 | 59.097 | 54.057 | 0.00 | 0.00 |
| ATOM 17184 | N   | PRO 1148 | 54.265 | 59.094 | 52.790 | 0.00 | 0.00 |
| ATOM 17185 | CD  | PRO 1148 | 53.287 | 58.526 | 51.910 | 0.00 | 0.00 |
| ATOM 17186 | HD2 | PRO 1148 | 53.636 | 57.696 | 51.296 | 0.00 | 0.00 |
| ATOM 17187 | HD3 | PRO 1148 | 52.356 | 58.319 | 52.439 | 0.00 | 0.00 |
| ATOM 17188 | CG  | PRO 1148 | 52.965 | 59.580 | 50.872 | 0.00 | 0.00 |
| ATOM 17189 | HG2 | PRO 1148 | 53.739 | 59.571 | 50.105 | 0.00 | 0.00 |
| ATOM 17190 | HG3 | PRO 1148 | 51.951 | 59.419 | 50.505 | 0.00 | 0.00 |
| ATOM 17191 | CB  | PRO 1148 | 53.048 | 60.859 | 51.705 | 0.00 | 0.00 |
| ATOM 17192 | HB2 | PRO 1148 | 53.172 | 61.722 | 51.050 | 0.00 | 0.00 |
| ATOM 17193 | HB3 | PRO 1148 | 52.172 | 61.091 | 52.311 | 0.00 | 0.00 |
| ATOM 17194 | CA  | PRO 1148 | 54.309 | 60.531 | 52.571 | 0.00 | 0.00 |
| ATOM 17195 | HA  | PRO 1148 | 55.171 | 60.551 | 51.904 | 0.00 | 0.00 |
| ATOM 17196 | C   | PRO 1148 | 54.404 | 61.501 | 53.681 | 0.00 | 0.00 |
| ATOM 17197 | O   | PRO 1148 | 55.202 | 62.426 | 53.600 | 0.00 | 0.00 |
| ATOM 17198 | N   | TRP 1149 | 53.709 | 61.289 | 54.827 | 0.00 | 0.00 |
| ATOM 17199 | H   | TRP 1149 | 53.089 | 60.494 | 54.873 | 0.00 | 0.00 |
| ATOM 17200 | CA  | TRP 1149 | 53.710 | 62.179 | 56.017 | 0.00 | 0.00 |
| ATOM 17201 | HA  | TRP 1149 | 53.489 | 63.202 | 55.713 | 0.00 | 0.00 |
| ATOM 17202 | CB  | TRP 1149 | 52.579 | 61.769 | 57.043 | 0.00 | 0.00 |
| ATOM 17203 | HB2 | TRP 1149 | 51.630 | 61.680 | 56.513 | 0.00 | 0.00 |
| ATOM 17204 | HB3 | TRP 1149 | 52.822 | 60.781 | 57.434 | 0.00 | 0.00 |
| ATOM 17205 | CG  | TRP 1149 | 52.461 | 62.738 | 58.213 | 0.00 | 0.00 |
| ATOM 17206 | CD1 | TRP 1149 | 51.684 | 63.840 | 58.216 | 0.00 | 0.00 |
| ATOM 17207 | HD1 | TRP 1149 | 51.151 | 64.206 | 57.351 | 0.00 | 0.00 |
| ATOM 17208 | NE1 | TRP 1149 | 51.775 | 64.516 | 59.429 | 0.00 | 0.00 |

|      |       |     |     |      |        |        |        |      |      |
|------|-------|-----|-----|------|--------|--------|--------|------|------|
| ATOM | 17209 | HE1 | TRP | 1149 | 51.302 | 65.370 | 59.686 | 0.00 | 0.00 |
| ATOM | 17210 | CE2 | TRP | 1149 | 52.570 | 63.798 | 60.278 | 0.00 | 0.00 |
| ATOM | 17211 | CZ2 | TRP | 1149 | 52.993 | 64.017 | 61.561 | 0.00 | 0.00 |
| ATOM | 17212 | HZ2 | TRP | 1149 | 52.683 | 64.930 | 62.048 | 0.00 | 0.00 |
| ATOM | 17213 | CH2 | TRP | 1149 | 53.942 | 63.189 | 62.169 | 0.00 | 0.00 |
| ATOM | 17214 | HH2 | TRP | 1149 | 54.306 | 63.552 | 63.118 | 0.00 | 0.00 |
| ATOM | 17215 | CZ3 | TRP | 1149 | 54.323 | 61.987 | 61.483 | 0.00 | 0.00 |
| ATOM | 17216 | HZ3 | TRP | 1149 | 54.896 | 61.215 | 61.973 | 0.00 | 0.00 |
| ATOM | 17217 | CE3 | TRP | 1149 | 53.820 | 61.716 | 60.190 | 0.00 | 0.00 |
| ATOM | 17218 | HE3 | TRP | 1149 | 54.153 | 60.790 | 59.745 | 0.00 | 0.00 |
| ATOM | 17219 | CD2 | TRP | 1149 | 52.943 | 62.655 | 59.561 | 0.00 | 0.00 |
| ATOM | 17220 | C   | TRP | 1149 | 55.002 | 62.195 | 56.771 | 0.00 | 0.00 |
| ATOM | 17221 | O   | TRP | 1149 | 55.477 | 63.242 | 57.201 | 0.00 | 0.00 |
| ATOM | 17222 | N   | TYR | 1150 | 55.586 | 61.019 | 56.990 | 0.00 | 0.00 |
| ATOM | 17223 | H   | TYR | 1150 | 55.107 | 60.222 | 56.596 | 0.00 | 0.00 |
| ATOM | 17224 | CA  | TYR | 1150 | 56.876 | 60.895 | 57.617 | 0.00 | 0.00 |
| ATOM | 17225 | HA  | TYR | 1150 | 56.916 | 61.728 | 58.320 | 0.00 | 0.00 |
| ATOM | 17226 | CB  | TYR | 1150 | 57.123 | 59.480 | 58.222 | 0.00 | 0.00 |
| ATOM | 17227 | HB2 | TYR | 1150 | 56.387 | 58.688 | 58.087 | 0.00 | 0.00 |
| ATOM | 17228 | HB3 | TYR | 1150 | 58.086 | 59.107 | 57.873 | 0.00 | 0.00 |
| ATOM | 17229 | CG  | TYR | 1150 | 57.277 | 59.550 | 59.718 | 0.00 | 0.00 |
| ATOM | 17230 | CD1 | TYR | 1150 | 56.354 | 58.956 | 60.532 | 0.00 | 0.00 |
| ATOM | 17231 | HD1 | TYR | 1150 | 55.504 | 58.528 | 60.021 | 0.00 | 0.00 |
| ATOM | 17232 | CE1 | TYR | 1150 | 56.565 | 58.958 | 61.940 | 0.00 | 0.00 |
| ATOM | 17233 | HE1 | TYR | 1150 | 55.884 | 58.392 | 62.558 | 0.00 | 0.00 |
| ATOM | 17234 | CZ  | TYR | 1150 | 57.686 | 59.603 | 62.422 | 0.00 | 0.00 |

|      |       |      |     |      |        |        |        |      |      |
|------|-------|------|-----|------|--------|--------|--------|------|------|
| ATOM | 17235 | OH   | TYR | 1150 | 57.993 | 59.346 | 63.742 | 0.00 | 0.00 |
| ATOM | 17236 | HH   | TYR | 1150 | 57.448 | 58.671 | 64.153 | 0.00 | 0.00 |
| ATOM | 17237 | CE2  | TYR | 1150 | 58.540 | 60.362 | 61.598 | 0.00 | 0.00 |
| ATOM | 17238 | HE2  | TYR | 1150 | 59.309 | 60.943 | 62.085 | 0.00 | 0.00 |
| ATOM | 17239 | CD2  | TYR | 1150 | 58.406 | 60.227 | 60.206 | 0.00 | 0.00 |
| ATOM | 17240 | HD2  | TYR | 1150 | 59.104 | 60.767 | 59.584 | 0.00 | 0.00 |
| ATOM | 17241 | C    | TYR | 1150 | 58.099 | 61.125 | 56.713 | 0.00 | 0.00 |
| ATOM | 17242 | O    | TYR | 1150 | 59.124 | 61.528 | 57.174 | 0.00 | 0.00 |
| ATOM | 17243 | N    | ILE | 1151 | 57.947 | 61.073 | 55.390 | 0.00 | 0.00 |
| ATOM | 17244 | H    | ILE | 1151 | 57.089 | 60.694 | 55.014 | 0.00 | 0.00 |
| ATOM | 17245 | CA   | ILE | 1151 | 58.847 | 61.613 | 54.394 | 0.00 | 0.00 |
| ATOM | 17246 | HA   | ILE | 1151 | 59.837 | 61.328 | 54.751 | 0.00 | 0.00 |
| ATOM | 17247 | CB   | ILE | 1151 | 58.600 | 60.943 | 52.999 | 0.00 | 0.00 |
| ATOM | 17248 | HB   | ILE | 1151 | 57.526 | 60.981 | 52.814 | 0.00 | 0.00 |
| ATOM | 17249 | CG2  | ILE | 1151 | 59.439 | 61.707 | 51.948 | 0.00 | 0.00 |
| ATOM | 17250 | 1HG2 | ILE | 1151 | 60.493 | 61.527 | 52.157 | 0.00 | 0.00 |
| ATOM | 17251 | 2HG2 | ILE | 1151 | 59.102 | 61.399 | 50.958 | 0.00 | 0.00 |
| ATOM | 17252 | 3HG2 | ILE | 1151 | 59.287 | 62.786 | 51.950 | 0.00 | 0.00 |
| ATOM | 17253 | CG1  | ILE | 1151 | 59.017 | 59.499 | 53.098 | 0.00 | 0.00 |
| ATOM | 17254 | 2HG1 | ILE | 1151 | 60.103 | 59.411 | 53.142 | 0.00 | 0.00 |
| ATOM | 17255 | 3HG1 | ILE | 1151 | 58.755 | 59.016 | 54.040 | 0.00 | 0.00 |
| ATOM | 17256 | CD1  | ILE | 1151 | 58.489 | 58.783 | 51.868 | 0.00 | 0.00 |
| ATOM | 17257 | 1HD1 | ILE | 1151 | 57.403 | 58.858 | 51.806 | 0.00 | 0.00 |
| ATOM | 17258 | 2HD1 | ILE | 1151 | 58.895 | 59.211 | 50.952 | 0.00 | 0.00 |
| ATOM | 17259 | 3HD1 | ILE | 1151 | 58.796 | 57.742 | 51.970 | 0.00 | 0.00 |
| ATOM | 17260 | C    | ILE | 1151 | 58.882 | 63.119 | 54.430 | 0.00 | 0.00 |

|            |     |     |      |        |        |        |      |      |
|------------|-----|-----|------|--------|--------|--------|------|------|
| ATOM 17261 | O   | ILE | 1151 | 59.974 | 63.745 | 54.460 | 0.00 | 0.00 |
| ATOM 17262 | N   | SER | 1152 | 57.662 | 63.712 | 54.451 | 0.00 | 0.00 |
| ATOM 17263 | H   | SER | 1152 | 56.876 | 63.089 | 54.336 | 0.00 | 0.00 |
| ATOM 17264 | CA  | SER | 1152 | 57.424 | 65.155 | 54.662 | 0.00 | 0.00 |
| ATOM 17265 | HA  | SER | 1152 | 57.812 | 65.758 | 53.842 | 0.00 | 0.00 |
| ATOM 17266 | CB  | SER | 1152 | 55.958 | 65.445 | 54.506 | 0.00 | 0.00 |
| ATOM 17267 | HB2 | SER | 1152 | 55.369 | 64.855 | 55.208 | 0.00 | 0.00 |
| ATOM 17268 | HB3 | SER | 1152 | 55.792 | 66.522 | 54.499 | 0.00 | 0.00 |
| ATOM 17269 | OG  | SER | 1152 | 55.655 | 65.025 | 53.243 | 0.00 | 0.00 |
| ATOM 17270 | HG  | SER | 1152 | 55.353 | 64.114 | 53.235 | 0.00 | 0.00 |
| ATOM 17271 | C   | SER | 1152 | 57.885 | 65.652 | 55.996 | 0.00 | 0.00 |
| ATOM 17272 | O   | SER | 1152 | 58.348 | 66.817 | 56.156 | 0.00 | 0.00 |
| ATOM 17273 | N   | ARG | 1153 | 57.781 | 64.843 | 57.097 | 0.00 | 0.00 |
| ATOM 17274 | H   | ARG | 1153 | 57.257 | 63.980 | 57.070 | 0.00 | 0.00 |
| ATOM 17275 | CA  | ARG | 1153 | 58.516 | 65.281 | 58.350 | 0.00 | 0.00 |
| ATOM 17276 | HA  | ARG | 1153 | 58.400 | 66.332 | 58.615 | 0.00 | 0.00 |
| ATOM 17277 | CB  | ARG | 1153 | 58.009 | 64.481 | 59.583 | 0.00 | 0.00 |
| ATOM 17278 | HB2 | ARG | 1153 | 58.884 | 64.241 | 60.187 | 0.00 | 0.00 |
| ATOM 17279 | HB3 | ARG | 1153 | 57.590 | 63.507 | 59.332 | 0.00 | 0.00 |
| ATOM 17280 | CG  | ARG | 1153 | 56.998 | 65.250 | 60.505 | 0.00 | 0.00 |
| ATOM 17281 | HG2 | ARG | 1153 | 56.690 | 64.675 | 61.378 | 0.00 | 0.00 |
| ATOM 17282 | HG3 | ARG | 1153 | 57.462 | 66.172 | 60.857 | 0.00 | 0.00 |
| ATOM 17283 | CD  | ARG | 1153 | 55.626 | 65.519 | 59.768 | 0.00 | 0.00 |
| ATOM 17284 | HD2 | ARG | 1153 | 55.166 | 64.609 | 59.382 | 0.00 | 0.00 |
| ATOM 17285 | HD3 | ARG | 1153 | 54.921 | 65.831 | 60.539 | 0.00 | 0.00 |
| ATOM 17286 | NE  | ARG | 1153 | 55.757 | 66.586 | 58.723 | 0.00 | 0.00 |

ATOM 17287 HE ARG 1153 56.580 67.170 58.757 0.00 0.00  
ATOM 17288 CZ ARG 1153 54.874 66.867 57.833 0.00 0.00  
ATOM 17289 NH1 ARG 1153 55.187 67.741 56.992 0.00 0.00  
ATOM 17290 1HH1 ARG 1153 54.448 68.255 56.535 0.00 0.00  
ATOM 17291 2HH1 ARG 1153 56.047 68.221 57.217 0.00 0.00  
ATOM 17292 NH2 ARG 1153 53.723 66.200 57.666 0.00 0.00  
ATOM 17293 1HH2 ARG 1153 53.191 66.419 56.836 0.00 0.00  
ATOM 17294 2HH2 ARG 1153 53.479 65.528 58.380 0.00 0.00  
ATOM 17295 C ARG 1153 60.041 65.136 58.129 0.00 0.00  
ATOM 17296 O ARG 1153 60.775 66.025 58.569 0.00 0.00  
ATOM 17297 N MET 1154 60.603 64.063 57.616 0.00 0.00  
ATOM 17298 H MET 1154 59.987 63.324 57.310 0.00 0.00  
ATOM 17299 CA MET 1154 62.090 63.955 57.508 0.00 0.00  
ATOM 17300 HA MET 1154 62.503 64.204 58.486 0.00 0.00  
ATOM 17301 CB MET 1154 62.614 62.553 57.099 0.00 0.00  
ATOM 17302 HB2 MET 1154 62.054 62.205 56.231 0.00 0.00  
ATOM 17303 HB3 MET 1154 63.663 62.589 56.804 0.00 0.00  
ATOM 17304 CG MET 1154 62.453 61.608 58.294 0.00 0.00  
ATOM 17305 HG2 MET 1154 61.372 61.548 58.419 0.00 0.00  
ATOM 17306 HG3 MET 1154 62.809 60.606 58.056 0.00 0.00  
ATOM 17307 SD MET 1154 63.095 62.050 59.866 0.00 0.00  
ATOM 17308 CE MET 1154 64.810 61.625 59.756 0.00 0.00  
ATOM 17309 HE1 MET 1154 65.460 62.499 59.818 0.00 0.00  
ATOM 17310 HE2 MET 1154 64.947 61.119 60.712 0.00 0.00  
ATOM 17311 HE3 MET 1154 64.975 60.979 58.894 0.00 0.00  
ATOM 17312 C MET 1154 62.833 64.924 56.597 0.00 0.00

|            |      |     |      |        |        |        |      |      |
|------------|------|-----|------|--------|--------|--------|------|------|
| ATOM 17313 | O    | MET | 1154 | 63.987 | 65.276 | 56.874 | 0.00 | 0.00 |
| ATOM 17314 | N    | LEU | 1155 | 62.162 | 65.394 | 55.557 | 0.00 | 0.00 |
| ATOM 17315 | H    | LEU | 1155 | 61.344 | 64.888 | 55.246 | 0.00 | 0.00 |
| ATOM 17316 | CA   | LEU | 1155 | 62.610 | 66.581 | 54.770 | 0.00 | 0.00 |
| ATOM 17317 | HA   | LEU | 1155 | 63.664 | 66.431 | 54.537 | 0.00 | 0.00 |
| ATOM 17318 | CB   | LEU | 1155 | 61.661 | 66.709 | 53.511 | 0.00 | 0.00 |
| ATOM 17319 | HB2  | LEU | 1155 | 60.629 | 66.605 | 53.846 | 0.00 | 0.00 |
| ATOM 17320 | HB3  | LEU | 1155 | 61.691 | 67.723 | 53.110 | 0.00 | 0.00 |
| ATOM 17321 | CG   | LEU | 1155 | 62.007 | 65.556 | 52.456 | 0.00 | 0.00 |
| ATOM 17322 | HG   | LEU | 1155 | 61.923 | 64.557 | 52.884 | 0.00 | 0.00 |
| ATOM 17323 | CD1  | LEU | 1155 | 61.080 | 65.799 | 51.253 | 0.00 | 0.00 |
| ATOM 17324 | 1HD1 | LEU | 1155 | 60.091 | 65.410 | 51.496 | 0.00 | 0.00 |
| ATOM 17325 | 2HD1 | LEU | 1155 | 61.051 | 66.874 | 51.073 | 0.00 | 0.00 |
| ATOM 17326 | 3HD1 | LEU | 1155 | 61.476 | 65.305 | 50.366 | 0.00 | 0.00 |
| ATOM 17327 | CD2  | LEU | 1155 | 63.549 | 65.431 | 52.023 | 0.00 | 0.00 |
| ATOM 17328 | 1HD2 | LEU | 1155 | 63.845 | 66.325 | 51.473 | 0.00 | 0.00 |
| ATOM 17329 | 2HD2 | LEU | 1155 | 64.297 | 65.275 | 52.801 | 0.00 | 0.00 |
| ATOM 17330 | 3HD2 | LEU | 1155 | 63.661 | 64.548 | 51.394 | 0.00 | 0.00 |
| ATOM 17331 | C    | LEU | 1155 | 62.525 | 67.895 | 55.571 | 0.00 | 0.00 |
| ATOM 17332 | O    | LEU | 1155 | 63.331 | 68.750 | 55.154 | 0.00 | 0.00 |
| ATOM 17333 | N    | GLN | 1156 | 61.805 | 68.031 | 56.627 | 0.00 | 0.00 |
| ATOM 17334 | H    | GLN | 1156 | 61.178 | 67.272 | 56.853 | 0.00 | 0.00 |
| ATOM 17335 | CA   | GLN | 1156 | 61.666 | 69.249 | 57.383 | 0.00 | 0.00 |
| ATOM 17336 | HA   | GLN | 1156 | 61.912 | 70.157 | 56.832 | 0.00 | 0.00 |
| ATOM 17337 | CB   | GLN | 1156 | 60.183 | 69.415 | 57.904 | 0.00 | 0.00 |
| ATOM 17338 | HB2  | GLN | 1156 | 59.785 | 68.421 | 58.106 | 0.00 | 0.00 |

|            |      |     |      |        |        |        |      |      |
|------------|------|-----|------|--------|--------|--------|------|------|
| ATOM 17339 | HB3  | GLN | 1156 | 60.266 | 69.949 | 58.851 | 0.00 | 0.00 |
| ATOM 17340 | CG   | GLN | 1156 | 59.343 | 70.155 | 56.843 | 0.00 | 0.00 |
| ATOM 17341 | HG2  | GLN | 1156 | 59.662 | 71.189 | 56.710 | 0.00 | 0.00 |
| ATOM 17342 | HG3  | GLN | 1156 | 59.237 | 69.658 | 55.879 | 0.00 | 0.00 |
| ATOM 17343 | CD   | GLN | 1156 | 57.870 | 70.264 | 57.411 | 0.00 | 0.00 |
| ATOM 17344 | OE1  | GLN | 1156 | 57.311 | 69.283 | 57.921 | 0.00 | 0.00 |
| ATOM 17345 | NE2  | GLN | 1156 | 57.269 | 71.351 | 57.130 | 0.00 | 0.00 |
| ATOM 17346 | 1HE2 | GLN | 1156 | 56.331 | 71.508 | 57.471 | 0.00 | 0.00 |
| ATOM 17347 | 2HE2 | GLN | 1156 | 57.810 | 72.085 | 56.697 | 0.00 | 0.00 |
| ATOM 17348 | C    | GLN | 1156 | 62.688 | 69.325 | 58.473 | 0.00 | 0.00 |
| ATOM 17349 | O    | GLN | 1156 | 63.436 | 70.324 | 58.665 | 0.00 | 0.00 |
| ATOM 17350 | N    | ALA | 1157 | 62.849 | 68.208 | 59.112 | 0.00 | 0.00 |
| ATOM 17351 | H    | ALA | 1157 | 62.201 | 67.446 | 58.972 | 0.00 | 0.00 |
| ATOM 17352 | CA   | ALA | 1157 | 64.118 | 67.959 | 59.765 | 0.00 | 0.00 |
| ATOM 17353 | HA   | ALA | 1157 | 64.167 | 68.724 | 60.539 | 0.00 | 0.00 |
| ATOM 17354 | CB   | ALA | 1157 | 63.977 | 66.684 | 60.589 | 0.00 | 0.00 |
| ATOM 17355 | HB1  | ALA | 1157 | 64.839 | 66.548 | 61.243 | 0.00 | 0.00 |
| ATOM 17356 | HB2  | ALA | 1157 | 63.070 | 66.616 | 61.189 | 0.00 | 0.00 |
| ATOM 17357 | HB3  | ALA | 1157 | 63.914 | 65.823 | 59.925 | 0.00 | 0.00 |
| ATOM 17358 | C    | ALA | 1157 | 65.376 | 67.996 | 58.965 | 0.00 | 0.00 |
| ATOM 17359 | O    | ALA | 1157 | 66.400 | 68.517 | 59.388 | 0.00 | 0.00 |
| ATOM 17360 | N    | ALA | 1158 | 65.448 | 67.593 | 57.702 | 0.00 | 0.00 |
| ATOM 17361 | H    | ALA | 1158 | 64.765 | 66.894 | 57.446 | 0.00 | 0.00 |
| ATOM 17362 | CA   | ALA | 1158 | 66.675 | 67.573 | 56.872 | 0.00 | 0.00 |
| ATOM 17363 | HA   | ALA | 1158 | 67.483 | 67.353 | 57.570 | 0.00 | 0.00 |
| ATOM 17364 | CB   | ALA | 1158 | 66.587 | 66.417 | 55.868 | 0.00 | 0.00 |

|      |       |     |     |      |        |        |        |      |      |
|------|-------|-----|-----|------|--------|--------|--------|------|------|
| ATOM | 17365 | HB1 | ALA | 1158 | 66.491 | 65.381 | 56.196 | 0.00 | 0.00 |
| ATOM | 17366 | HB2 | ALA | 1158 | 65.777 | 66.524 | 55.147 | 0.00 | 0.00 |
| ATOM | 17367 | HB3 | ALA | 1158 | 67.521 | 66.457 | 55.309 | 0.00 | 0.00 |
| ATOM | 17368 | C   | ALA | 1158 | 67.063 | 68.923 | 56.330 | 0.00 | 0.00 |
| ATOM | 17369 | O   | ALA | 1158 | 68.231 | 69.271 | 56.284 | 0.00 | 0.00 |
| ATOM | 17370 | N   | ASP | 1159 | 66.121 | 69.760 | 55.919 | 0.00 | 0.00 |
| ATOM | 17371 | H   | ASP | 1159 | 65.169 | 69.437 | 55.822 | 0.00 | 0.00 |
| ATOM | 17372 | CA  | ASP | 1159 | 66.400 | 71.178 | 55.634 | 0.00 | 0.00 |
| ATOM | 17373 | HA  | ASP | 1159 | 67.136 | 71.397 | 54.861 | 0.00 | 0.00 |
| ATOM | 17374 | CB  | ASP | 1159 | 65.124 | 71.911 | 55.212 | 0.00 | 0.00 |
| ATOM | 17375 | HB2 | ASP | 1159 | 64.681 | 71.255 | 54.464 | 0.00 | 0.00 |
| ATOM | 17376 | HB3 | ASP | 1159 | 64.468 | 71.925 | 56.082 | 0.00 | 0.00 |
| ATOM | 17377 | CG  | ASP | 1159 | 65.430 | 73.239 | 54.600 | 0.00 | 0.00 |
| ATOM | 17378 | OD1 | ASP | 1159 | 64.970 | 74.268 | 55.051 | 0.00 | 0.00 |
| ATOM | 17379 | OD2 | ASP | 1159 | 65.883 | 73.149 | 53.440 | 0.00 | 0.00 |
| ATOM | 17380 | C   | ASP | 1159 | 66.923 | 71.956 | 56.792 | 0.00 | 0.00 |
| ATOM | 17381 | O   | ASP | 1159 | 67.462 | 73.060 | 56.683 | 0.00 | 0.00 |
| ATOM | 17382 | N   | SER | 1160 | 66.973 | 71.338 | 58.000 | 0.00 | 0.00 |
| ATOM | 17383 | H   | SER | 1160 | 66.491 | 70.458 | 58.112 | 0.00 | 0.00 |
| ATOM | 17384 | CA  | SER | 1160 | 67.526 | 71.915 | 59.223 | 0.00 | 0.00 |
| ATOM | 17385 | HA  | SER | 1160 | 67.698 | 72.965 | 58.984 | 0.00 | 0.00 |
| ATOM | 17386 | CB  | SER | 1160 | 66.442 | 71.824 | 60.312 | 0.00 | 0.00 |
| ATOM | 17387 | HB2 | SER | 1160 | 66.255 | 70.774 | 60.538 | 0.00 | 0.00 |
| ATOM | 17388 | HB3 | SER | 1160 | 66.858 | 72.256 | 61.222 | 0.00 | 0.00 |
| ATOM | 17389 | OG  | SER | 1160 | 65.151 | 72.421 | 60.016 | 0.00 | 0.00 |
| ATOM | 17390 | HG  | SER | 1160 | 64.616 | 71.714 | 59.648 | 0.00 | 0.00 |



|            |      |     |      |        |        |        |      |      |
|------------|------|-----|------|--------|--------|--------|------|------|
| ATOM 17391 | C    | SER | 1160 | 68.868 | 71.232 | 59.629 | 0.00 | 0.00 |
| ATOM 17392 | O    | SER | 1160 | 69.417 | 71.554 | 60.694 | 0.00 | 0.00 |
| ATOM 17393 | N    | LEU | 1161 | 69.354 | 70.275 | 58.838 | 0.00 | 0.00 |
| ATOM 17394 | H    | LEU | 1161 | 68.948 | 70.121 | 57.926 | 0.00 | 0.00 |
| ATOM 17395 | CA   | LEU | 1161 | 70.673 | 69.581 | 59.058 | 0.00 | 0.00 |
| ATOM 17396 | HA   | LEU | 1161 | 70.905 | 69.955 | 60.055 | 0.00 | 0.00 |
| ATOM 17397 | CB   | LEU | 1161 | 70.500 | 68.075 | 58.955 | 0.00 | 0.00 |
| ATOM 17398 | HB2  | LEU | 1161 | 69.975 | 67.795 | 58.043 | 0.00 | 0.00 |
| ATOM 17399 | HB3  | LEU | 1161 | 71.504 | 67.656 | 58.890 | 0.00 | 0.00 |
| ATOM 17400 | CG   | LEU | 1161 | 69.888 | 67.414 | 60.166 | 0.00 | 0.00 |
| ATOM 17401 | HG   | LEU | 1161 | 68.960 | 67.865 | 60.517 | 0.00 | 0.00 |
| ATOM 17402 | CD1  | LEU | 1161 | 69.416 | 66.025 | 59.716 | 0.00 | 0.00 |
| ATOM 17403 | 1HD1 | LEU | 1161 | 68.961 | 65.511 | 60.562 | 0.00 | 0.00 |
| ATOM 17404 | 2HD1 | LEU | 1161 | 68.704 | 66.199 | 58.909 | 0.00 | 0.00 |
| ATOM 17405 | 3HD1 | LEU | 1161 | 70.227 | 65.416 | 59.315 | 0.00 | 0.00 |
| ATOM 17406 | CD2  | LEU | 1161 | 70.848 | 67.282 | 61.416 | 0.00 | 0.00 |
| ATOM 17407 | 1HD2 | LEU | 1161 | 70.845 | 68.228 | 61.959 | 0.00 | 0.00 |
| ATOM 17408 | 2HD2 | LEU | 1161 | 70.602 | 66.535 | 62.171 | 0.00 | 0.00 |
| ATOM 17409 | 3HD2 | LEU | 1161 | 71.895 | 67.189 | 61.126 | 0.00 | 0.00 |
| ATOM 17410 | C    | LEU | 1161 | 71.759 | 70.063 | 58.081 | 0.00 | 0.00 |
| ATOM 17411 | O    | LEU | 1161 | 71.424 | 70.563 | 57.017 | 0.00 | 0.00 |
| ATOM 17412 | N    | PRO | 1162 | 73.068 | 70.002 | 58.558 | 0.00 | 0.00 |
| ATOM 17413 | CD   | PRO | 1162 | 73.462 | 69.630 | 59.911 | 0.00 | 0.00 |
| ATOM 17414 | HD2  | PRO | 1162 | 73.133 | 70.385 | 60.625 | 0.00 | 0.00 |
| ATOM 17415 | HD3  | PRO | 1162 | 73.079 | 68.693 | 60.315 | 0.00 | 0.00 |
| ATOM 17416 | CG   | PRO | 1162 | 75.032 | 69.356 | 59.798 | 0.00 | 0.00 |

|            |          |      |        |        |        |      |      |
|------------|----------|------|--------|--------|--------|------|------|
| ATOM 17417 | HG2 PRO  | 1162 | 75.462 | 69.269 | 60.796 | 0.00 | 0.00 |
| ATOM 17418 | HG3 PRO  | 1162 | 75.184 | 68.414 | 59.270 | 0.00 | 0.00 |
| ATOM 17419 | CB PRO   | 1162 | 75.352 | 70.641 | 58.970 | 0.00 | 0.00 |
| ATOM 17420 | HB2 PRO  | 1162 | 75.294 | 71.619 | 59.447 | 0.00 | 0.00 |
| ATOM 17421 | HB3 PRO  | 1162 | 76.368 | 70.641 | 58.575 | 0.00 | 0.00 |
| ATOM 17422 | CA PRO   | 1162 | 74.247 | 70.545 | 57.880 | 0.00 | 0.00 |
| ATOM 17423 | HA PRO   | 1162 | 74.037 | 71.546 | 57.503 | 0.00 | 0.00 |
| ATOM 17424 | C PRO    | 1162 | 74.710 | 69.623 | 56.769 | 0.00 | 0.00 |
| ATOM 17425 | O PRO    | 1162 | 75.501 | 70.066 | 55.910 | 0.00 | 0.00 |
| ATOM 17426 | N VAL    | 1163 | 74.339 | 68.356 | 56.938 | 0.00 | 0.00 |
| ATOM 17427 | H VAL    | 1163 | 73.628 | 68.225 | 57.643 | 0.00 | 0.00 |
| ATOM 17428 | CA VAL   | 1163 | 74.666 | 67.319 | 55.967 | 0.00 | 0.00 |
| ATOM 17429 | HA VAL   | 1163 | 75.706 | 67.460 | 55.672 | 0.00 | 0.00 |
| ATOM 17430 | CB VAL   | 1163 | 74.486 | 65.859 | 56.583 | 0.00 | 0.00 |
| ATOM 17431 | HB VAL   | 1163 | 74.628 | 65.105 | 55.810 | 0.00 | 0.00 |
| ATOM 17432 | CG1 VAL  | 1163 | 75.561 | 65.560 | 57.605 | 0.00 | 0.00 |
| ATOM 17433 | 1HG1 VAL | 1163 | 75.258 | 66.125 | 58.486 | 0.00 | 0.00 |
| ATOM 17434 | 2HG1 VAL | 1163 | 75.548 | 64.531 | 57.963 | 0.00 | 0.00 |
| ATOM 17435 | 3HG1 VAL | 1163 | 76.537 | 65.901 | 57.258 | 0.00 | 0.00 |
| ATOM 17436 | CG2 VAL  | 1163 | 73.134 | 65.648 | 57.296 | 0.00 | 0.00 |
| ATOM 17437 | 1HG2 VAL | 1163 | 73.127 | 66.067 | 58.302 | 0.00 | 0.00 |
| ATOM 17438 | 2HG2 VAL | 1163 | 72.328 | 66.213 | 56.827 | 0.00 | 0.00 |
| ATOM 17439 | 3HG2 VAL | 1163 | 72.909 | 64.582 | 57.287 | 0.00 | 0.00 |
| ATOM 17440 | C VAL    | 1163 | 73.886 | 67.594 | 54.710 | 0.00 | 0.00 |
| ATOM 17441 | O VAL    | 1163 | 72.737 | 67.997 | 54.866 | 0.00 | 0.00 |
| ATOM 17442 | N ASN    | 1164 | 74.431 | 67.327 | 53.540 | 0.00 | 0.00 |

|            |      |          |        |        |        |      |      |
|------------|------|----------|--------|--------|--------|------|------|
| ATOM 17443 | H    | ASN 1164 | 75.254 | 66.767 | 53.713 | 0.00 | 0.00 |
| ATOM 17444 | CA   | ASN 1164 | 73.586 | 67.116 | 52.397 | 0.00 | 0.00 |
| ATOM 17445 | HA   | ASN 1164 | 72.871 | 67.934 | 52.479 | 0.00 | 0.00 |
| ATOM 17446 | CB   | ASN 1164 | 74.409 | 66.936 | 51.095 | 0.00 | 0.00 |
| ATOM 17447 | HB2  | ASN 1164 | 74.883 | 65.957 | 51.033 | 0.00 | 0.00 |
| ATOM 17448 | HB3  | ASN 1164 | 73.711 | 67.039 | 50.264 | 0.00 | 0.00 |
| ATOM 17449 | CG   | ASN 1164 | 75.383 | 68.046 | 50.830 | 0.00 | 0.00 |
| ATOM 17450 | OD1  | ASN 1164 | 75.114 | 69.250 | 50.908 | 0.00 | 0.00 |
| ATOM 17451 | ND2  | ASN 1164 | 76.538 | 67.668 | 50.416 | 0.00 | 0.00 |
| ATOM 17452 | 1HD2 | ASN 1164 | 77.339 | 68.248 | 50.214 | 0.00 | 0.00 |
| ATOM 17453 | 2HD2 | ASN 1164 | 76.804 | 66.694 | 50.433 | 0.00 | 0.00 |
| ATOM 17454 | C    | ASN 1164 | 72.822 | 65.784 | 52.550 | 0.00 | 0.00 |
| ATOM 17455 | O    | ASN 1164 | 73.385 | 64.777 | 52.953 | 0.00 | 0.00 |
| ATOM 17456 | N    | ILE 1165 | 71.491 | 65.676 | 52.218 | 0.00 | 0.00 |
| ATOM 17457 | H    | ILE 1165 | 70.980 | 66.502 | 51.942 | 0.00 | 0.00 |
| ATOM 17458 | CA   | ILE 1165 | 70.573 | 64.587 | 52.443 | 0.00 | 0.00 |
| ATOM 17459 | HA   | ILE 1165 | 71.043 | 63.644 | 52.724 | 0.00 | 0.00 |
| ATOM 17460 | CB   | ILE 1165 | 69.665 | 64.859 | 53.636 | 0.00 | 0.00 |
| ATOM 17461 | HB   | ILE 1165 | 69.427 | 65.922 | 53.678 | 0.00 | 0.00 |
| ATOM 17462 | CG2  | ILE 1165 | 68.355 | 64.111 | 53.627 | 0.00 | 0.00 |
| ATOM 17463 | 1HG2 | ILE 1165 | 67.791 | 64.236 | 54.552 | 0.00 | 0.00 |
| ATOM 17464 | 2HG2 | ILE 1165 | 67.765 | 64.413 | 52.762 | 0.00 | 0.00 |
| ATOM 17465 | 3HG2 | ILE 1165 | 68.612 | 63.054 | 53.565 | 0.00 | 0.00 |
| ATOM 17466 | CG1  | ILE 1165 | 70.465 | 64.512 | 54.952 | 0.00 | 0.00 |
| ATOM 17467 | 2HG1 | ILE 1165 | 70.633 | 63.437 | 54.882 | 0.00 | 0.00 |
| ATOM 17468 | 3HG1 | ILE 1165 | 71.407 | 65.052 | 54.858 | 0.00 | 0.00 |

|      |       |      |     |      |        |        |        |      |      |
|------|-------|------|-----|------|--------|--------|--------|------|------|
| ATOM | 17469 | CD1  | ILE | 1165 | 69.832 | 64.811 | 56.328 | 0.00 | 0.00 |
| ATOM | 17470 | 1HD1 | ILE | 1165 | 68.890 | 64.292 | 56.502 | 0.00 | 0.00 |
| ATOM | 17471 | 2HD1 | ILE | 1165 | 70.577 | 64.594 | 57.094 | 0.00 | 0.00 |
| ATOM | 17472 | 3HD1 | ILE | 1165 | 69.638 | 65.883 | 56.340 | 0.00 | 0.00 |
| ATOM | 17473 | C    | ILE | 1165 | 69.814 | 64.226 | 51.176 | 0.00 | 0.00 |
| ATOM | 17474 | O    | ILE | 1165 | 69.201 | 65.051 | 50.514 | 0.00 | 0.00 |
| ATOM | 17475 | N    | GLY | 1166 | 69.952 | 62.948 | 50.843 | 0.00 | 0.00 |
| ATOM | 17476 | H    | GLY | 1166 | 70.531 | 62.360 | 51.425 | 0.00 | 0.00 |
| ATOM | 17477 | CA   | GLY | 1166 | 68.826 | 62.187 | 50.250 | 0.00 | 0.00 |
| ATOM | 17478 | HA2  | GLY | 1166 | 69.153 | 61.706 | 49.329 | 0.00 | 0.00 |
| ATOM | 17479 | HA3  | GLY | 1166 | 68.123 | 62.990 | 50.027 | 0.00 | 0.00 |
| ATOM | 17480 | C    | GLY | 1166 | 68.126 | 61.235 | 51.246 | 0.00 | 0.00 |
| ATOM | 17481 | O    | GLY | 1166 | 68.710 | 60.505 | 51.988 | 0.00 | 0.00 |
| ATOM | 17482 | N    | LEU | 1167 | 66.837 | 61.036 | 51.044 | 0.00 | 0.00 |
| ATOM | 17483 | H    | LEU | 1167 | 66.368 | 61.652 | 50.396 | 0.00 | 0.00 |
| ATOM | 17484 | CA   | LEU | 1167 | 66.003 | 60.047 | 51.750 | 0.00 | 0.00 |
| ATOM | 17485 | HA   | LEU | 1167 | 66.528 | 59.667 | 52.627 | 0.00 | 0.00 |
| ATOM | 17486 | CB   | LEU | 1167 | 64.722 | 60.738 | 52.271 | 0.00 | 0.00 |
| ATOM | 17487 | HB2  | LEU | 1167 | 64.367 | 61.171 | 51.336 | 0.00 | 0.00 |
| ATOM | 17488 | HB3  | LEU | 1167 | 64.028 | 59.966 | 52.602 | 0.00 | 0.00 |
| ATOM | 17489 | CG   | LEU | 1167 | 64.872 | 61.953 | 53.277 | 0.00 | 0.00 |
| ATOM | 17490 | HG   | LEU | 1167 | 65.546 | 62.673 | 52.811 | 0.00 | 0.00 |
| ATOM | 17491 | CD1  | LEU | 1167 | 63.478 | 62.454 | 53.562 | 0.00 | 0.00 |
| ATOM | 17492 | 1HD1 | LEU | 1167 | 63.557 | 63.408 | 54.082 | 0.00 | 0.00 |
| ATOM | 17493 | 2HD1 | LEU | 1167 | 63.045 | 62.699 | 52.592 | 0.00 | 0.00 |
| ATOM | 17494 | 3HD1 | LEU | 1167 | 62.826 | 61.724 | 54.040 | 0.00 | 0.00 |

|            |      |     |      |        |        |        |      |      |
|------------|------|-----|------|--------|--------|--------|------|------|
| ATOM 17495 | CD2  | LEU | 1167 | 65.528 | 61.615 | 54.637 | 0.00 | 0.00 |
| ATOM 17496 | 1HD2 | LEU | 1167 | 64.857 | 61.007 | 55.244 | 0.00 | 0.00 |
| ATOM 17497 | 2HD2 | LEU | 1167 | 66.527 | 61.225 | 54.439 | 0.00 | 0.00 |
| ATOM 17498 | 3HD2 | LEU | 1167 | 65.555 | 62.572 | 55.158 | 0.00 | 0.00 |
| ATOM 17499 | C    | LEU | 1167 | 65.784 | 58.815 | 50.911 | 0.00 | 0.00 |
| ATOM 17500 | O    | LEU | 1167 | 65.454 | 58.926 | 49.710 | 0.00 | 0.00 |
| ATOM 17501 | N    | LEU | 1168 | 65.754 | 57.694 | 51.621 | 0.00 | 0.00 |
| ATOM 17502 | H    | LEU | 1168 | 66.086 | 57.782 | 52.571 | 0.00 | 0.00 |
| ATOM 17503 | CA   | LEU | 1168 | 65.188 | 56.421 | 51.189 | 0.00 | 0.00 |
| ATOM 17504 | HA   | LEU | 1168 | 65.076 | 56.471 | 50.106 | 0.00 | 0.00 |
| ATOM 17505 | CB   | LEU | 1168 | 66.144 | 55.218 | 51.691 | 0.00 | 0.00 |
| ATOM 17506 | HB2  | LEU | 1168 | 66.216 | 55.320 | 52.774 | 0.00 | 0.00 |
| ATOM 17507 | HB3  | LEU | 1168 | 65.513 | 54.348 | 51.506 | 0.00 | 0.00 |
| ATOM 17508 | CG   | LEU | 1168 | 67.580 | 55.191 | 50.994 | 0.00 | 0.00 |
| ATOM 17509 | HG   | LEU | 1168 | 68.000 | 56.192 | 51.087 | 0.00 | 0.00 |
| ATOM 17510 | CD1  | LEU | 1168 | 68.403 | 54.194 | 51.789 | 0.00 | 0.00 |
| ATOM 17511 | 1HD1 | LEU | 1168 | 68.027 | 53.180 | 51.654 | 0.00 | 0.00 |
| ATOM 17512 | 2HD1 | LEU | 1168 | 69.423 | 54.207 | 51.406 | 0.00 | 0.00 |
| ATOM 17513 | 3HD1 | LEU | 1168 | 68.423 | 54.483 | 52.840 | 0.00 | 0.00 |
| ATOM 17514 | CD2  | LEU | 1168 | 67.431 | 54.745 | 49.538 | 0.00 | 0.00 |
| ATOM 17515 | 1HD2 | LEU | 1168 | 68.401 | 54.738 | 49.040 | 0.00 | 0.00 |
| ATOM 17516 | 2HD2 | LEU | 1168 | 66.974 | 53.758 | 49.469 | 0.00 | 0.00 |
| ATOM 17517 | 3HD2 | LEU | 1168 | 66.740 | 55.420 | 49.034 | 0.00 | 0.00 |
| ATOM 17518 | C    | LEU | 1168 | 63.810 | 56.187 | 51.829 | 0.00 | 0.00 |
| ATOM 17519 | O    | LEU | 1168 | 63.642 | 56.377 | 53.036 | 0.00 | 0.00 |
| ATOM 17520 | N    | GLY | 1169 | 62.909 | 55.601 | 51.069 | 0.00 | 0.00 |

|      |       |     |     |      |        |        |        |      |      |
|------|-------|-----|-----|------|--------|--------|--------|------|------|
| ATOM | 17521 | H   | GLY | 1169 | 63.241 | 55.191 | 50.207 | 0.00 | 0.00 |
| ATOM | 17522 | CA  | GLY | 1169 | 61.474 | 55.307 | 51.395 | 0.00 | 0.00 |
| ATOM | 17523 | HA2 | GLY | 1169 | 61.061 | 55.818 | 52.265 | 0.00 | 0.00 |
| ATOM | 17524 | HA3 | GLY | 1169 | 60.896 | 55.501 | 50.492 | 0.00 | 0.00 |
| ATOM | 17525 | C   | GLY | 1169 | 61.305 | 53.802 | 51.624 | 0.00 | 0.00 |
| ATOM | 17526 | O   | GLY | 1169 | 62.126 | 52.990 | 51.197 | 0.00 | 0.00 |
| ATOM | 17527 | N   | LYS | 1170 | 60.170 | 53.380 | 52.227 | 0.00 | 0.00 |
| ATOM | 17528 | H   | LYS | 1170 | 59.507 | 54.119 | 52.412 | 0.00 | 0.00 |
| ATOM | 17529 | CA  | LYS | 1170 | 59.712 | 51.978 | 52.337 | 0.00 | 0.00 |
| ATOM | 17530 | HA  | LYS | 1170 | 60.474 | 51.341 | 52.785 | 0.00 | 0.00 |
| ATOM | 17531 | CB  | LYS | 1170 | 58.494 | 51.938 | 53.275 | 0.00 | 0.00 |
| ATOM | 17532 | HB2 | LYS | 1170 | 58.575 | 52.640 | 54.105 | 0.00 | 0.00 |
| ATOM | 17533 | HB3 | LYS | 1170 | 57.653 | 52.335 | 52.705 | 0.00 | 0.00 |
| ATOM | 17534 | CG  | LYS | 1170 | 58.155 | 50.499 | 53.716 | 0.00 | 0.00 |
| ATOM | 17535 | HG2 | LYS | 1170 | 58.186 | 49.918 | 52.794 | 0.00 | 0.00 |
| ATOM | 17536 | HG3 | LYS | 1170 | 58.919 | 50.238 | 54.449 | 0.00 | 0.00 |
| ATOM | 17537 | CD  | LYS | 1170 | 56.702 | 50.261 | 54.230 | 0.00 | 0.00 |
| ATOM | 17538 | HD2 | LYS | 1170 | 56.092 | 50.583 | 53.386 | 0.00 | 0.00 |
| ATOM | 17539 | HD3 | LYS | 1170 | 56.609 | 49.186 | 54.382 | 0.00 | 0.00 |
| ATOM | 17540 | CE  | LYS | 1170 | 56.308 | 51.006 | 55.524 | 0.00 | 0.00 |
| ATOM | 17541 | HE2 | LYS | 1170 | 57.107 | 50.944 | 56.263 | 0.00 | 0.00 |
| ATOM | 17542 | HE3 | LYS | 1170 | 56.085 | 52.051 | 55.311 | 0.00 | 0.00 |
| ATOM | 17543 | NZ  | LYS | 1170 | 55.094 | 50.411 | 56.163 | 0.00 | 0.00 |
| ATOM | 17544 | HZ1 | LYS | 1170 | 55.228 | 49.411 | 56.213 | 0.00 | 0.00 |
| ATOM | 17545 | HZ2 | LYS | 1170 | 54.959 | 50.761 | 57.101 | 0.00 | 0.00 |
| ATOM | 17546 | HZ3 | LYS | 1170 | 54.289 | 50.542 | 55.569 | 0.00 | 0.00 |

|      |       |      |     |      |        |        |        |      |      |
|------|-------|------|-----|------|--------|--------|--------|------|------|
| ATOM | 17547 | C    | LYS | 1170 | 59.432 | 51.371 | 50.942 | 0.00 | 0.00 |
| ATOM | 17548 | O    | LYS | 1170 | 58.409 | 51.663 | 50.324 | 0.00 | 0.00 |
| ATOM | 17549 | N    | GLY | 1171 | 60.310 | 50.446 | 50.449 | 0.00 | 0.00 |
| ATOM | 17550 | H    | GLY | 1171 | 61.250 | 50.391 | 50.816 | 0.00 | 0.00 |
| ATOM | 17551 | CA   | GLY | 1171 | 60.200 | 49.798 | 49.154 | 0.00 | 0.00 |
| ATOM | 17552 | HA2  | GLY | 1171 | 59.926 | 50.426 | 48.306 | 0.00 | 0.00 |
| ATOM | 17553 | HA3  | GLY | 1171 | 61.164 | 49.309 | 49.013 | 0.00 | 0.00 |
| ATOM | 17554 | C    | GLY | 1171 | 59.141 | 48.621 | 49.176 | 0.00 | 0.00 |
| ATOM | 17555 | O    | GLY | 1171 | 58.734 | 48.149 | 48.108 | 0.00 | 0.00 |
| ATOM | 17556 | N    | ASN | 1172 | 58.778 | 48.176 | 50.394 | 0.00 | 0.00 |
| ATOM | 17557 | H    | ASN | 1172 | 59.149 | 48.649 | 51.205 | 0.00 | 0.00 |
| ATOM | 17558 | CA   | ASN | 1172 | 58.079 | 46.868 | 50.631 | 0.00 | 0.00 |
| ATOM | 17559 | HA   | ASN | 1172 | 58.347 | 46.135 | 49.871 | 0.00 | 0.00 |
| ATOM | 17560 | CB   | ASN | 1172 | 58.613 | 46.247 | 51.916 | 0.00 | 0.00 |
| ATOM | 17561 | HB2  | ASN | 1172 | 58.572 | 47.005 | 52.698 | 0.00 | 0.00 |
| ATOM | 17562 | HB3  | ASN | 1172 | 57.933 | 45.462 | 52.245 | 0.00 | 0.00 |
| ATOM | 17563 | CG   | ASN | 1172 | 59.909 | 45.490 | 51.651 | 0.00 | 0.00 |
| ATOM | 17564 | OD1  | ASN | 1172 | 60.957 | 46.060 | 51.905 | 0.00 | 0.00 |
| ATOM | 17565 | ND2  | ASN | 1172 | 59.885 | 44.316 | 51.038 | 0.00 | 0.00 |
| ATOM | 17566 | 1HD2 | ASN | 1172 | 60.727 | 43.759 | 51.037 | 0.00 | 0.00 |
| ATOM | 17567 | 2HD2 | ASN | 1172 | 59.039 | 43.898 | 50.679 | 0.00 | 0.00 |
| ATOM | 17568 | C    | ASN | 1172 | 56.569 | 47.110 | 50.526 | 0.00 | 0.00 |
| ATOM | 17569 | O    | ASN | 1172 | 55.893 | 47.291 | 51.504 | 0.00 | 0.00 |
| ATOM | 17570 | N    | VAL | 1173 | 56.102 | 47.211 | 49.265 | 0.00 | 0.00 |
| ATOM | 17571 | H    | VAL | 1173 | 56.719 | 47.015 | 48.489 | 0.00 | 0.00 |
| ATOM | 17572 | CA   | VAL | 1173 | 54.609 | 47.117 | 48.906 | 0.00 | 0.00 |

|            |      |     |      |        |        |        |      |      |
|------------|------|-----|------|--------|--------|--------|------|------|
| ATOM 17573 | HA   | VAL | 1173 | 54.031 | 46.640 | 49.698 | 0.00 | 0.00 |
| ATOM 17574 | CB   | VAL | 1173 | 53.955 | 48.514 | 48.776 | 0.00 | 0.00 |
| ATOM 17575 | HB   | VAL | 1173 | 54.108 | 48.867 | 47.756 | 0.00 | 0.00 |
| ATOM 17576 | CG1  | VAL | 1173 | 52.394 | 48.293 | 48.795 | 0.00 | 0.00 |
| ATOM 17577 | 1HG1 | VAL | 1173 | 51.833 | 49.216 | 48.655 | 0.00 | 0.00 |
| ATOM 17578 | 2HG1 | VAL | 1173 | 52.282 | 47.594 | 47.966 | 0.00 | 0.00 |
| ATOM 17579 | 3HG1 | VAL | 1173 | 52.003 | 47.890 | 49.729 | 0.00 | 0.00 |
| ATOM 17580 | CG2  | VAL | 1173 | 54.390 | 49.577 | 49.824 | 0.00 | 0.00 |
| ATOM 17581 | 1HG2 | VAL | 1173 | 55.454 | 49.507 | 50.046 | 0.00 | 0.00 |
| ATOM 17582 | 2HG2 | VAL | 1173 | 54.188 | 50.586 | 49.463 | 0.00 | 0.00 |
| ATOM 17583 | 3HG2 | VAL | 1173 | 53.776 | 49.432 | 50.713 | 0.00 | 0.00 |
| ATOM 17584 | C    | VAL | 1173 | 54.455 | 46.381 | 47.525 | 0.00 | 0.00 |
| ATOM 17585 | O    | VAL | 1173 | 55.032 | 46.804 | 46.566 | 0.00 | 0.00 |
| ATOM 17586 | N    | SER | 1174 | 53.658 | 45.358 | 47.461 | 0.00 | 0.00 |
| ATOM 17587 | H    | SER | 1174 | 53.322 | 45.004 | 48.345 | 0.00 | 0.00 |
| ATOM 17588 | CA   | SER | 1174 | 53.330 | 44.652 | 46.144 | 0.00 | 0.00 |
| ATOM 17589 | HA   | SER | 1174 | 54.347 | 44.483 | 45.790 | 0.00 | 0.00 |
| ATOM 17590 | CB   | SER | 1174 | 52.713 | 43.305 | 46.487 | 0.00 | 0.00 |
| ATOM 17591 | HB2  | SER | 1174 | 51.837 | 43.484 | 47.110 | 0.00 | 0.00 |
| ATOM 17592 | HB3  | SER | 1174 | 52.481 | 42.750 | 45.578 | 0.00 | 0.00 |
| ATOM 17593 | OG   | SER | 1174 | 53.654 | 42.512 | 47.278 | 0.00 | 0.00 |
| ATOM 17594 | HG   | SER | 1174 | 53.815 | 42.947 | 48.119 | 0.00 | 0.00 |
| ATOM 17595 | C    | SER | 1174 | 52.470 | 45.398 | 45.123 | 0.00 | 0.00 |
| ATOM 17596 | O    | SER | 1174 | 51.737 | 44.683 | 44.386 | 0.00 | 0.00 |
| ATOM 17597 | N    | GLN | 1175 | 52.625 | 46.712 | 44.927 | 0.00 | 0.00 |
| ATOM 17598 | H    | GLN | 1175 | 53.385 | 47.084 | 45.478 | 0.00 | 0.00 |



|            |      |     |      |        |        |        |      |      |
|------------|------|-----|------|--------|--------|--------|------|------|
| ATOM 17599 | CA   | GLN | 1175 | 52.082 | 47.487 | 43.834 | 0.00 | 0.00 |
| ATOM 17600 | HA   | GLN | 1175 | 52.203 | 46.985 | 42.874 | 0.00 | 0.00 |
| ATOM 17601 | CB   | GLN | 1175 | 50.559 | 47.713 | 43.902 | 0.00 | 0.00 |
| ATOM 17602 | HB2  | GLN | 1175 | 50.082 | 48.232 | 43.070 | 0.00 | 0.00 |
| ATOM 17603 | HB3  | GLN | 1175 | 50.111 | 46.721 | 43.835 | 0.00 | 0.00 |
| ATOM 17604 | CG   | GLN | 1175 | 50.011 | 48.324 | 45.225 | 0.00 | 0.00 |
| ATOM 17605 | HG2  | GLN | 1175 | 49.135 | 47.717 | 45.455 | 0.00 | 0.00 |
| ATOM 17606 | HG3  | GLN | 1175 | 50.835 | 48.376 | 45.936 | 0.00 | 0.00 |
| ATOM 17607 | CD   | GLN | 1175 | 49.506 | 49.783 | 45.071 | 0.00 | 0.00 |
| ATOM 17608 | OE1  | GLN | 1175 | 49.939 | 50.512 | 44.223 | 0.00 | 0.00 |
| ATOM 17609 | NE2  | GLN | 1175 | 48.574 | 50.208 | 45.873 | 0.00 | 0.00 |
| ATOM 17610 | 1HE2 | GLN | 1175 | 48.359 | 51.174 | 46.078 | 0.00 | 0.00 |
| ATOM 17611 | 2HE2 | GLN | 1175 | 48.261 | 49.469 | 46.487 | 0.00 | 0.00 |
| ATOM 17612 | C    | GLN | 1175 | 52.759 | 48.874 | 43.762 | 0.00 | 0.00 |
| ATOM 17613 | O    | GLN | 1175 | 53.020 | 49.421 | 44.867 | 0.00 | 0.00 |
| ATOM 17614 | N    | PRO | 1176 | 53.018 | 49.436 | 42.567 | 0.00 | 0.00 |
| ATOM 17615 | CD   | PRO | 1176 | 52.582 | 48.823 | 41.319 | 0.00 | 0.00 |
| ATOM 17616 | HD2  | PRO | 1176 | 53.243 | 47.965 | 41.192 | 0.00 | 0.00 |
| ATOM 17617 | HD3  | PRO | 1176 | 51.512 | 48.613 | 41.316 | 0.00 | 0.00 |
| ATOM 17618 | CG   | PRO | 1176 | 53.027 | 49.820 | 40.240 | 0.00 | 0.00 |
| ATOM 17619 | HG2  | PRO | 1176 | 53.354 | 49.335 | 39.320 | 0.00 | 0.00 |
| ATOM 17620 | HG3  | PRO | 1176 | 52.285 | 50.606 | 40.099 | 0.00 | 0.00 |
| ATOM 17621 | CB   | PRO | 1176 | 54.232 | 50.470 | 40.906 | 0.00 | 0.00 |
| ATOM 17622 | HB2  | PRO | 1176 | 55.094 | 49.815 | 40.778 | 0.00 | 0.00 |
| ATOM 17623 | HB3  | PRO | 1176 | 54.458 | 51.426 | 40.434 | 0.00 | 0.00 |
| ATOM 17624 | CA   | PRO | 1176 | 53.978 | 50.528 | 42.430 | 0.00 | 0.00 |

|            |     |     |      |        |        |        |      |      |
|------------|-----|-----|------|--------|--------|--------|------|------|
| ATOM 17625 | HA  | PRO | 1176 | 54.830 | 50.285 | 43.066 | 0.00 | 0.00 |
| ATOM 17626 | C   | PRO | 1176 | 53.508 | 51.908 | 42.849 | 0.00 | 0.00 |
| ATOM 17627 | O   | PRO | 1176 | 54.310 | 52.676 | 43.326 | 0.00 | 0.00 |
| ATOM 17628 | N   | ASP | 1177 | 52.179 | 52.189 | 42.626 | 0.00 | 0.00 |
| ATOM 17629 | H   | ASP | 1177 | 51.598 | 51.433 | 42.294 | 0.00 | 0.00 |
| ATOM 17630 | CA  | ASP | 1177 | 51.622 | 53.596 | 42.882 | 0.00 | 0.00 |
| ATOM 17631 | HA  | ASP | 1177 | 52.186 | 54.264 | 42.231 | 0.00 | 0.00 |
| ATOM 17632 | CB  | ASP | 1177 | 50.123 | 53.571 | 42.408 | 0.00 | 0.00 |
| ATOM 17633 | HB2 | ASP | 1177 | 50.068 | 52.906 | 41.546 | 0.00 | 0.00 |
| ATOM 17634 | HB3 | ASP | 1177 | 49.410 | 53.246 | 43.166 | 0.00 | 0.00 |
| ATOM 17635 | CG  | ASP | 1177 | 49.759 | 54.998 | 41.972 | 0.00 | 0.00 |
| ATOM 17636 | OD1 | ASP | 1177 | 49.932 | 55.165 | 40.753 | 0.00 | 0.00 |
| ATOM 17637 | OD2 | ASP | 1177 | 49.534 | 55.890 | 42.797 | 0.00 | 0.00 |
| ATOM 17638 | C   | ASP | 1177 | 51.705 | 54.142 | 44.363 | 0.00 | 0.00 |
| ATOM 17639 | O   | ASP | 1177 | 51.958 | 55.305 | 44.560 | 0.00 | 0.00 |
| ATOM 17640 | N   | ALA | 1178 | 51.573 | 53.312 | 45.355 | 0.00 | 0.00 |
| ATOM 17641 | H   | ALA | 1178 | 51.324 | 52.349 | 45.181 | 0.00 | 0.00 |
| ATOM 17642 | CA  | ALA | 1178 | 51.927 | 53.602 | 46.746 | 0.00 | 0.00 |
| ATOM 17643 | HA  | ALA | 1178 | 51.331 | 54.447 | 47.091 | 0.00 | 0.00 |
| ATOM 17644 | CB  | ALA | 1178 | 51.716 | 52.260 | 47.592 | 0.00 | 0.00 |
| ATOM 17645 | HB1 | ALA | 1178 | 52.390 | 51.499 | 47.199 | 0.00 | 0.00 |
| ATOM 17646 | HB2 | ALA | 1178 | 51.987 | 52.417 | 48.636 | 0.00 | 0.00 |
| ATOM 17647 | HB3 | ALA | 1178 | 50.700 | 51.865 | 47.574 | 0.00 | 0.00 |
| ATOM 17648 | C   | ALA | 1178 | 53.419 | 54.017 | 46.763 | 0.00 | 0.00 |
| ATOM 17649 | O   | ALA | 1178 | 53.794 | 54.982 | 47.432 | 0.00 | 0.00 |
| ATOM 17650 | N   | LEU | 1179 | 54.284 | 53.346 | 46.000 | 0.00 | 0.00 |

|            |      |     |      |        |        |        |      |      |
|------------|------|-----|------|--------|--------|--------|------|------|
| ATOM 17651 | H    | LEU | 1179 | 53.894 | 52.688 | 45.341 | 0.00 | 0.00 |
| ATOM 17652 | CA   | LEU | 1179 | 55.665 | 53.614 | 46.099 | 0.00 | 0.00 |
| ATOM 17653 | HA   | LEU | 1179 | 55.985 | 53.712 | 47.137 | 0.00 | 0.00 |
| ATOM 17654 | CB   | LEU | 1179 | 56.446 | 52.456 | 45.500 | 0.00 | 0.00 |
| ATOM 17655 | HB2  | LEU | 1179 | 56.365 | 52.511 | 44.414 | 0.00 | 0.00 |
| ATOM 17656 | HB3  | LEU | 1179 | 57.489 | 52.753 | 45.610 | 0.00 | 0.00 |
| ATOM 17657 | CG   | LEU | 1179 | 56.346 | 51.057 | 45.955 | 0.00 | 0.00 |
| ATOM 17658 | HG   | LEU | 1179 | 55.333 | 50.699 | 45.774 | 0.00 | 0.00 |
| ATOM 17659 | CD1  | LEU | 1179 | 57.207 | 50.153 | 45.099 | 0.00 | 0.00 |
| ATOM 17660 | 1HD1 | LEU | 1179 | 57.171 | 49.131 | 45.476 | 0.00 | 0.00 |
| ATOM 17661 | 2HD1 | LEU | 1179 | 56.731 | 50.184 | 44.119 | 0.00 | 0.00 |
| ATOM 17662 | 3HD1 | LEU | 1179 | 58.200 | 50.595 | 45.185 | 0.00 | 0.00 |
| ATOM 17663 | CD2  | LEU | 1179 | 56.844 | 50.994 | 47.361 | 0.00 | 0.00 |
| ATOM 17664 | 1HD2 | LEU | 1179 | 57.791 | 51.505 | 47.538 | 0.00 | 0.00 |
| ATOM 17665 | 2HD2 | LEU | 1179 | 56.212 | 51.531 | 48.068 | 0.00 | 0.00 |
| ATOM 17666 | 3HD2 | LEU | 1179 | 56.897 | 49.942 | 47.640 | 0.00 | 0.00 |
| ATOM 17667 | C    | LEU | 1179 | 56.068 | 54.893 | 45.278 | 0.00 | 0.00 |
| ATOM 17668 | O    | LEU | 1179 | 56.953 | 55.629 | 45.716 | 0.00 | 0.00 |
| ATOM 17669 | N    | ARG | 1180 | 55.440 | 55.198 | 44.150 | 0.00 | 0.00 |
| ATOM 17670 | H    | ARG | 1180 | 54.902 | 54.448 | 43.739 | 0.00 | 0.00 |
| ATOM 17671 | CA   | ARG | 1180 | 55.368 | 56.543 | 43.429 | 0.00 | 0.00 |
| ATOM 17672 | HA   | ARG | 1180 | 56.280 | 56.757 | 42.871 | 0.00 | 0.00 |
| ATOM 17673 | CB   | ARG | 1180 | 54.252 | 56.662 | 42.365 | 0.00 | 0.00 |
| ATOM 17674 | HB2  | ARG | 1180 | 53.287 | 56.347 | 42.761 | 0.00 | 0.00 |
| ATOM 17675 | HB3  | ARG | 1180 | 54.188 | 57.730 | 42.156 | 0.00 | 0.00 |
| ATOM 17676 | CG   | ARG | 1180 | 54.461 | 55.847 | 41.143 | 0.00 | 0.00 |

|      |       |      |     |      |        |        |        |      |      |
|------|-------|------|-----|------|--------|--------|--------|------|------|
| ATOM | 17677 | HG2  | ARG | 1180 | 55.410 | 56.233 | 40.771 | 0.00 | 0.00 |
| ATOM | 17678 | HG3  | ARG | 1180 | 54.465 | 54.818 | 41.503 | 0.00 | 0.00 |
| ATOM | 17679 | CD   | ARG | 1180 | 53.272 | 55.961 | 40.129 | 0.00 | 0.00 |
| ATOM | 17680 | HD2  | ARG | 1180 | 52.253 | 55.848 | 40.498 | 0.00 | 0.00 |
| ATOM | 17681 | HD3  | ARG | 1180 | 53.164 | 56.908 | 39.600 | 0.00 | 0.00 |
| ATOM | 17682 | NE   | ARG | 1180 | 53.401 | 54.889 | 39.114 | 0.00 | 0.00 |
| ATOM | 17683 | HE   | ARG | 1180 | 54.264 | 54.935 | 38.591 | 0.00 | 0.00 |
| ATOM | 17684 | CZ   | ARG | 1180 | 52.568 | 53.978 | 38.638 | 0.00 | 0.00 |
| ATOM | 17685 | NH1  | ARG | 1180 | 51.485 | 53.648 | 39.134 | 0.00 | 0.00 |
| ATOM | 17686 | 1HH1 | ARG | 1180 | 51.037 | 52.812 | 38.788 | 0.00 | 0.00 |
| ATOM | 17687 | 2HH1 | ARG | 1180 | 51.074 | 54.055 | 39.962 | 0.00 | 0.00 |
| ATOM | 17688 | NH2  | ARG | 1180 | 52.989 | 53.179 | 37.735 | 0.00 | 0.00 |
| ATOM | 17689 | 1HH2 | ARG | 1180 | 52.546 | 52.307 | 37.481 | 0.00 | 0.00 |
| ATOM | 17690 | 2HH2 | ARG | 1180 | 53.682 | 53.580 | 37.119 | 0.00 | 0.00 |
| ATOM | 17691 | C    | ARG | 1180 | 55.101 | 57.674 | 44.385 | 0.00 | 0.00 |
| ATOM | 17692 | O    | ARG | 1180 | 55.719 | 58.772 | 44.235 | 0.00 | 0.00 |
| ATOM | 17693 | N    | GLU | 1181 | 54.040 | 57.458 | 45.268 | 0.00 | 0.00 |
| ATOM | 17694 | H    | GLU | 1181 | 53.529 | 56.588 | 45.297 | 0.00 | 0.00 |
| ATOM | 17695 | CA   | GLU | 1181 | 53.576 | 58.439 | 46.219 | 0.00 | 0.00 |
| ATOM | 17696 | HA   | GLU | 1181 | 53.350 | 59.311 | 45.605 | 0.00 | 0.00 |
| ATOM | 17697 | CB   | GLU | 1181 | 52.356 | 57.941 | 46.927 | 0.00 | 0.00 |
| ATOM | 17698 | HB2  | GLU | 1181 | 51.732 | 57.424 | 46.198 | 0.00 | 0.00 |
| ATOM | 17699 | HB3  | GLU | 1181 | 52.684 | 57.245 | 47.698 | 0.00 | 0.00 |
| ATOM | 17700 | CG   | GLU | 1181 | 51.338 | 59.008 | 47.533 | 0.00 | 0.00 |
| ATOM | 17701 | HG2  | GLU | 1181 | 50.505 | 58.551 | 48.067 | 0.00 | 0.00 |
| ATOM | 17702 | HG3  | GLU | 1181 | 51.831 | 59.684 | 48.232 | 0.00 | 0.00 |

|            |      |     |      |        |        |        |      |      |
|------------|------|-----|------|--------|--------|--------|------|------|
| ATOM 17703 | CD   | GLU | 1181 | 50.814 | 60.026 | 46.477 | 0.00 | 0.00 |
| ATOM 17704 | OE1  | GLU | 1181 | 49.625 | 59.983 | 46.112 | 0.00 | 0.00 |
| ATOM 17705 | OE2  | GLU | 1181 | 51.592 | 60.956 | 46.212 | 0.00 | 0.00 |
| ATOM 17706 | C    | GLU | 1181 | 54.702 | 58.863 | 47.131 | 0.00 | 0.00 |
| ATOM 17707 | O    | GLU | 1181 | 54.919 | 60.058 | 47.286 | 0.00 | 0.00 |
| ATOM 17708 | N    | GLN | 1182 | 55.456 | 57.890 | 47.602 | 0.00 | 0.00 |
| ATOM 17709 | H    | GLN | 1182 | 55.024 | 56.978 | 47.568 | 0.00 | 0.00 |
| ATOM 17710 | CA   | GLN | 1182 | 56.669 | 58.244 | 48.468 | 0.00 | 0.00 |
| ATOM 17711 | HA   | GLN | 1182 | 56.338 | 58.997 | 49.184 | 0.00 | 0.00 |
| ATOM 17712 | CB   | GLN | 1182 | 57.214 | 56.947 | 49.193 | 0.00 | 0.00 |
| ATOM 17713 | HB2  | GLN | 1182 | 57.584 | 56.359 | 48.353 | 0.00 | 0.00 |
| ATOM 17714 | HB3  | GLN | 1182 | 58.152 | 57.155 | 49.706 | 0.00 | 0.00 |
| ATOM 17715 | CG   | GLN | 1182 | 56.212 | 56.422 | 50.193 | 0.00 | 0.00 |
| ATOM 17716 | HG2  | GLN | 1182 | 56.153 | 57.079 | 51.061 | 0.00 | 0.00 |
| ATOM 17717 | HG3  | GLN | 1182 | 55.222 | 56.243 | 49.775 | 0.00 | 0.00 |
| ATOM 17718 | CD   | GLN | 1182 | 56.731 | 54.991 | 50.614 | 0.00 | 0.00 |
| ATOM 17719 | OE1  | GLN | 1182 | 56.841 | 54.683 | 51.817 | 0.00 | 0.00 |
| ATOM 17720 | NE2  | GLN | 1182 | 56.941 | 54.057 | 49.758 | 0.00 | 0.00 |
| ATOM 17721 | 1HE2 | GLN | 1182 | 57.435 | 53.216 | 50.021 | 0.00 | 0.00 |
| ATOM 17722 | 2HE2 | GLN | 1182 | 56.382 | 54.026 | 48.917 | 0.00 | 0.00 |
| ATOM 17723 | C    | GLN | 1182 | 57.844 | 58.928 | 47.684 | 0.00 | 0.00 |
| ATOM 17724 | O    | GLN | 1182 | 58.602 | 59.688 | 48.313 | 0.00 | 0.00 |
| ATOM 17725 | N    | VAL | 1183 | 57.820 | 58.847 | 46.373 | 0.00 | 0.00 |
| ATOM 17726 | H    | VAL | 1183 | 57.116 | 58.232 | 45.992 | 0.00 | 0.00 |
| ATOM 17727 | CA   | VAL | 1183 | 58.830 | 59.474 | 45.429 | 0.00 | 0.00 |
| ATOM 17728 | HA   | VAL | 1183 | 59.760 | 59.465 | 45.998 | 0.00 | 0.00 |

|            |               |        |        |        |      |      |
|------------|---------------|--------|--------|--------|------|------|
| ATOM 17729 | CB VAL 1183   | 59.053 | 58.678 | 44.090 | 0.00 | 0.00 |
| ATOM 17730 | HB VAL 1183   | 58.113 | 58.454 | 43.585 | 0.00 | 0.00 |
| ATOM 17731 | CG1 VAL 1183  | 60.092 | 59.316 | 43.150 | 0.00 | 0.00 |
| ATOM 17732 | 1HG1 VAL 1183 | 60.948 | 59.682 | 43.716 | 0.00 | 0.00 |
| ATOM 17733 | 2HG1 VAL 1183 | 60.366 | 58.645 | 42.336 | 0.00 | 0.00 |
| ATOM 17734 | 3HG1 VAL 1183 | 59.709 | 60.235 | 42.705 | 0.00 | 0.00 |
| ATOM 17735 | CG2 VAL 1183  | 59.640 | 57.256 | 44.450 | 0.00 | 0.00 |
| ATOM 17736 | 1HG2 VAL 1183 | 58.908 | 56.824 | 45.131 | 0.00 | 0.00 |
| ATOM 17737 | 2HG2 VAL 1183 | 59.888 | 56.637 | 43.587 | 0.00 | 0.00 |
| ATOM 17738 | 3HG2 VAL 1183 | 60.579 | 57.357 | 44.995 | 0.00 | 0.00 |
| ATOM 17739 | C VAL 1183    | 58.352 | 60.888 | 45.176 | 0.00 | 0.00 |
| ATOM 17740 | O VAL 1183    | 59.117 | 61.819 | 45.283 | 0.00 | 0.00 |
| ATOM 17741 | N ALA 1184    | 57.107 | 61.165 | 44.838 | 0.00 | 0.00 |
| ATOM 17742 | H ALA 1184    | 56.372 | 60.475 | 44.773 | 0.00 | 0.00 |
| ATOM 17743 | CA ALA 1184   | 56.563 | 62.551 | 44.708 | 0.00 | 0.00 |
| ATOM 17744 | HA ALA 1184   | 57.244 | 63.158 | 44.111 | 0.00 | 0.00 |
| ATOM 17745 | CB ALA 1184   | 55.302 | 62.458 | 43.828 | 0.00 | 0.00 |
| ATOM 17746 | HB1 ALA 1184  | 54.495 | 62.118 | 44.477 | 0.00 | 0.00 |
| ATOM 17747 | HB2 ALA 1184  | 55.065 | 63.468 | 43.494 | 0.00 | 0.00 |
| ATOM 17748 | HB3 ALA 1184  | 55.510 | 61.735 | 43.039 | 0.00 | 0.00 |
| ATOM 17749 | C ALA 1184    | 56.372 | 63.337 | 46.044 | 0.00 | 0.00 |
| ATOM 17750 | O ALA 1184    | 55.964 | 64.517 | 46.150 | 0.00 | 0.00 |
| ATOM 17751 | N ALA 1185    | 56.691 | 62.642 | 47.151 | 0.00 | 0.00 |
| ATOM 17752 | H ALA 1185    | 56.940 | 61.686 | 46.941 | 0.00 | 0.00 |
| ATOM 17753 | CA ALA 1185   | 56.931 | 63.231 | 48.509 | 0.00 | 0.00 |
| ATOM 17754 | HA ALA 1185   | 56.540 | 64.248 | 48.535 | 0.00 | 0.00 |

|            |      |     |      |        |        |        |      |      |
|------------|------|-----|------|--------|--------|--------|------|------|
| ATOM 17755 | CB   | ALA | 1185 | 56.207 | 62.384 | 49.512 | 0.00 | 0.00 |
| ATOM 17756 | HB1  | ALA | 1185 | 55.132 | 62.281 | 49.359 | 0.00 | 0.00 |
| ATOM 17757 | HB2  | ALA | 1185 | 56.749 | 61.443 | 49.422 | 0.00 | 0.00 |
| ATOM 17758 | HB3  | ALA | 1185 | 56.406 | 62.669 | 50.545 | 0.00 | 0.00 |
| ATOM 17759 | C    | ALA | 1185 | 58.372 | 63.437 | 48.787 | 0.00 | 0.00 |
| ATOM 17760 | O    | ALA | 1185 | 58.722 | 64.084 | 49.822 | 0.00 | 0.00 |
| ATOM 17761 | N    | GLY | 1186 | 59.314 | 63.002 | 47.982 | 0.00 | 0.00 |
| ATOM 17762 | H    | GLY | 1186 | 58.915 | 62.666 | 47.118 | 0.00 | 0.00 |
| ATOM 17763 | CA   | GLY | 1186 | 60.716 | 63.551 | 47.857 | 0.00 | 0.00 |
| ATOM 17764 | HA2  | GLY | 1186 | 60.947 | 63.942 | 46.866 | 0.00 | 0.00 |
| ATOM 17765 | HA3  | GLY | 1186 | 60.726 | 64.457 | 48.463 | 0.00 | 0.00 |
| ATOM 17766 | C    | GLY | 1186 | 61.911 | 62.689 | 48.312 | 0.00 | 0.00 |
| ATOM 17767 | O    | GLY | 1186 | 63.051 | 63.190 | 48.478 | 0.00 | 0.00 |
| ATOM 17768 | N    | VAL | 1187 | 61.733 | 61.351 | 48.321 | 0.00 | 0.00 |
| ATOM 17769 | H    | VAL | 1187 | 60.816 | 60.933 | 48.261 | 0.00 | 0.00 |
| ATOM 17770 | CA   | VAL | 1187 | 62.877 | 60.346 | 48.356 | 0.00 | 0.00 |
| ATOM 17771 | HA   | VAL | 1187 | 63.571 | 60.715 | 49.111 | 0.00 | 0.00 |
| ATOM 17772 | CB   | VAL | 1187 | 62.398 | 58.922 | 48.773 | 0.00 | 0.00 |
| ATOM 17773 | HB   | VAL | 1187 | 63.250 | 58.246 | 48.836 | 0.00 | 0.00 |
| ATOM 17774 | CG1  | VAL | 1187 | 61.641 | 58.970 | 50.135 | 0.00 | 0.00 |
| ATOM 17775 | 1HG1 | VAL | 1187 | 60.937 | 59.801 | 50.173 | 0.00 | 0.00 |
| ATOM 17776 | 2HG1 | VAL | 1187 | 61.158 | 58.015 | 50.340 | 0.00 | 0.00 |
| ATOM 17777 | 3HG1 | VAL | 1187 | 62.415 | 59.117 | 50.888 | 0.00 | 0.00 |
| ATOM 17778 | CG2  | VAL | 1187 | 61.573 | 58.175 | 47.752 | 0.00 | 0.00 |
| ATOM 17779 | 1HG2 | VAL | 1187 | 60.665 | 58.769 | 47.654 | 0.00 | 0.00 |
| ATOM 17780 | 2HG2 | VAL | 1187 | 62.076 | 58.132 | 46.786 | 0.00 | 0.00 |

ATOM 17781 3HG2 VAL 1187 61.311 57.180 48.113 0.00 0.00  
ATOM 17782 C VAL 1187 63.653 60.303 47.062 0.00 0.00  
ATOM 17783 O VAL 1187 63.155 60.757 46.038 0.00 0.00  
ATOM 17784 N ILE 1188 64.875 59.843 47.097 0.00 0.00  
ATOM 17785 H ILE 1188 65.096 59.445 47.999 0.00 0.00  
ATOM 17786 CA ILE 1188 65.769 59.516 45.936 0.00 0.00  
ATOM 17787 HA ILE 1188 65.150 59.885 45.118 0.00 0.00  
ATOM 17788 CB ILE 1188 67.105 60.315 45.851 0.00 0.00  
ATOM 17789 HB ILE 1188 67.655 60.054 44.947 0.00 0.00  
ATOM 17790 CG2 ILE 1188 66.822 61.789 45.658 0.00 0.00  
ATOM 17791 1HG2 ILE 1188 66.482 62.142 46.632 0.00 0.00  
ATOM 17792 2HG2 ILE 1188 67.736 62.302 45.358 0.00 0.00  
ATOM 17793 3HG2 ILE 1188 65.995 61.898 44.956 0.00 0.00  
ATOM 17794 CG1 ILE 1188 67.953 59.956 47.094 0.00 0.00  
ATOM 17795 2HG1 ILE 1188 67.636 60.494 47.987 0.00 0.00  
ATOM 17796 3HG1 ILE 1188 67.862 58.871 47.141 0.00 0.00  
ATOM 17797 CD1 ILE 1188 69.388 60.258 46.749 0.00 0.00  
ATOM 17798 1HD1 ILE 1188 69.519 61.319 46.537 0.00 0.00  
ATOM 17799 2HD1 ILE 1188 69.997 60.026 47.622 0.00 0.00  
ATOM 17800 3HD1 ILE 1188 69.796 59.629 45.958 0.00 0.00  
ATOM 17801 C ILE 1188 65.940 58.022 45.621 0.00 0.00  
ATOM 17802 O ILE 1188 66.740 57.631 44.723 0.00 0.00  
ATOM 17803 N GLY 1189 65.376 57.128 46.428 0.00 0.00  
ATOM 17804 H GLY 1189 64.680 57.392 47.111 0.00 0.00  
ATOM 17805 CA GLY 1189 65.429 55.700 46.193 0.00 0.00  
ATOM 17806 HA2 GLY 1189 65.080 55.483 45.184 0.00 0.00



|            |      |     |      |        |        |        |      |      |
|------------|------|-----|------|--------|--------|--------|------|------|
| ATOM 17807 | HA3  | GLY | 1189 | 66.441 | 55.306 | 46.293 | 0.00 | 0.00 |
| ATOM 17808 | C    | GLY | 1189 | 64.486 | 54.925 | 47.215 | 0.00 | 0.00 |
| ATOM 17809 | O    | GLY | 1189 | 63.964 | 55.606 | 48.097 | 0.00 | 0.00 |
| ATOM 17810 | N    | LEU | 1190 | 64.300 | 53.588 | 46.991 | 0.00 | 0.00 |
| ATOM 17811 | H    | LEU | 1190 | 64.679 | 53.118 | 46.181 | 0.00 | 0.00 |
| ATOM 17812 | CA   | LEU | 1190 | 63.445 | 52.822 | 47.976 | 0.00 | 0.00 |
| ATOM 17813 | HA   | LEU | 1190 | 63.249 | 53.392 | 48.883 | 0.00 | 0.00 |
| ATOM 17814 | CB   | LEU | 1190 | 62.173 | 52.407 | 47.266 | 0.00 | 0.00 |
| ATOM 17815 | HB2  | LEU | 1190 | 62.494 | 51.756 | 46.453 | 0.00 | 0.00 |
| ATOM 17816 | HB3  | LEU | 1190 | 61.628 | 51.751 | 47.946 | 0.00 | 0.00 |
| ATOM 17817 | CG   | LEU | 1190 | 61.286 | 53.526 | 46.671 | 0.00 | 0.00 |
| ATOM 17818 | HG   | LEU | 1190 | 61.873 | 54.376 | 46.322 | 0.00 | 0.00 |
| ATOM 17819 | CD1  | LEU | 1190 | 60.330 | 52.850 | 45.608 | 0.00 | 0.00 |
| ATOM 17820 | 1HD1 | LEU | 1190 | 59.762 | 53.622 | 45.090 | 0.00 | 0.00 |
| ATOM 17821 | 2HD1 | LEU | 1190 | 60.866 | 52.284 | 44.847 | 0.00 | 0.00 |
| ATOM 17822 | 3HD1 | LEU | 1190 | 59.670 | 52.231 | 46.215 | 0.00 | 0.00 |
| ATOM 17823 | CD2  | LEU | 1190 | 60.367 | 54.104 | 47.761 | 0.00 | 0.00 |
| ATOM 17824 | 1HD2 | LEU | 1190 | 59.713 | 54.841 | 47.295 | 0.00 | 0.00 |
| ATOM 17825 | 2HD2 | LEU | 1190 | 59.788 | 53.380 | 48.334 | 0.00 | 0.00 |
| ATOM 17826 | 3HD2 | LEU | 1190 | 61.139 | 54.604 | 48.345 | 0.00 | 0.00 |
| ATOM 17827 | C    | LEU | 1190 | 64.127 | 51.534 | 48.350 | 0.00 | 0.00 |
| ATOM 17828 | O    | LEU | 1190 | 64.720 | 50.893 | 47.470 | 0.00 | 0.00 |
| ATOM 17829 | N    | KCB | 1191 | 64.205 | 51.099 | 49.655 | 0.00 | 0.00 |
| ATOM 17830 | H    | KCB | 1191 | 63.607 | 51.631 | 50.272 | 0.00 | 0.00 |
| ATOM 17831 | CA   | KCB | 1191 | 64.963 | 49.914 | 50.031 | 0.00 | 0.00 |
| ATOM 17832 | HA   | KCB | 1191 | 65.551 | 49.707 | 49.137 | 0.00 | 0.00 |

|            |     |     |      |        |        |        |      |      |
|------------|-----|-----|------|--------|--------|--------|------|------|
| ATOM 17833 | CB  | KCB | 1191 | 65.882 | 50.185 | 51.182 | 0.00 | 0.00 |
| ATOM 17834 | HB2 | KCB | 1191 | 66.620 | 50.899 | 50.815 | 0.00 | 0.00 |
| ATOM 17835 | HB3 | KCB | 1191 | 65.286 | 50.682 | 51.947 | 0.00 | 0.00 |
| ATOM 17836 | CG  | KCB | 1191 | 66.565 | 48.904 | 51.698 | 0.00 | 0.00 |
| ATOM 17837 | HG2 | KCB | 1191 | 65.833 | 48.125 | 51.912 | 0.00 | 0.00 |
| ATOM 17838 | HG3 | KCB | 1191 | 67.164 | 48.519 | 50.872 | 0.00 | 0.00 |
| ATOM 17839 | CD  | KCB | 1191 | 67.413 | 49.198 | 52.971 | 0.00 | 0.00 |
| ATOM 17840 | HD2 | KCB | 1191 | 68.220 | 49.883 | 52.710 | 0.00 | 0.00 |
| ATOM 17841 | HD3 | KCB | 1191 | 66.779 | 49.589 | 53.766 | 0.00 | 0.00 |
| ATOM 17842 | CE  | KCB | 1191 | 68.095 | 47.921 | 53.540 | 0.00 | 0.00 |
| ATOM 17843 | HE2 | KCB | 1191 | 67.337 | 47.143 | 53.618 | 0.00 | 0.00 |
| ATOM 17844 | HE3 | KCB | 1191 | 68.920 | 47.714 | 52.858 | 0.00 | 0.00 |
| ATOM 17845 | NZ  | KCB | 1191 | 68.539 | 48.300 | 54.893 | 0.00 | 0.00 |
| ATOM 17846 | HZ1 | KCB | 1191 | 68.281 | 49.220 | 55.220 | 0.00 | 0.00 |
| ATOM 17847 | CX  | KCB | 1191 | 69.075 | 47.475 | 55.801 | 0.00 | 0.00 |
| ATOM 17848 | OX1 | KCB | 1191 | 69.502 | 46.394 | 55.397 | 0.00 | 0.00 |
| ATOM 17849 | OX2 | KCB | 1191 | 68.965 | 47.824 | 56.963 | 0.00 | 0.00 |
| ATOM 17850 | C   | KCB | 1191 | 63.933 | 48.773 | 50.204 | 0.00 | 0.00 |
| ATOM 17851 | O   | KCB | 1191 | 62.874 | 48.936 | 50.825 | 0.00 | 0.00 |
| ATOM 17852 | N   | ILE | 1192 | 64.279 | 47.608 | 49.749 | 0.00 | 0.00 |
| ATOM 17853 | H   | ILE | 1192 | 65.067 | 47.655 | 49.120 | 0.00 | 0.00 |
| ATOM 17854 | CA  | ILE | 1192 | 63.611 | 46.223 | 49.959 | 0.00 | 0.00 |
| ATOM 17855 | HA  | ILE | 1192 | 62.592 | 46.405 | 50.303 | 0.00 | 0.00 |
| ATOM 17856 | CB  | ILE | 1192 | 63.611 | 45.364 | 48.687 | 0.00 | 0.00 |
| ATOM 17857 | HB  | ILE | 1192 | 64.622 | 45.174 | 48.324 | 0.00 | 0.00 |
| ATOM 17858 | CG2 | ILE | 1192 | 62.841 | 44.071 | 48.929 | 0.00 | 0.00 |

|            |      |     |      |        |        |        |      |      |
|------------|------|-----|------|--------|--------|--------|------|------|
| ATOM 17859 | 1HG2 | ILE | 1192 | 61.804 | 44.282 | 49.193 | 0.00 | 0.00 |
| ATOM 17860 | 2HG2 | ILE | 1192 | 62.956 | 43.593 | 47.956 | 0.00 | 0.00 |
| ATOM 17861 | 3HG2 | ILE | 1192 | 63.314 | 43.500 | 49.728 | 0.00 | 0.00 |
| ATOM 17862 | CG1  | ILE | 1192 | 62.800 | 45.997 | 47.523 | 0.00 | 0.00 |
| ATOM 17863 | 2HG1 | ILE | 1192 | 62.690 | 45.235 | 46.752 | 0.00 | 0.00 |
| ATOM 17864 | 3HG1 | ILE | 1192 | 61.813 | 46.212 | 47.933 | 0.00 | 0.00 |
| ATOM 17865 | CD1  | ILE | 1192 | 63.474 | 47.061 | 46.719 | 0.00 | 0.00 |
| ATOM 17866 | 1HD1 | ILE | 1192 | 62.755 | 47.587 | 46.092 | 0.00 | 0.00 |
| ATOM 17867 | 2HD1 | ILE | 1192 | 63.796 | 47.920 | 47.308 | 0.00 | 0.00 |
| ATOM 17868 | 3HD1 | ILE | 1192 | 64.407 | 46.674 | 46.311 | 0.00 | 0.00 |
| ATOM 17869 | C    | ILE | 1192 | 64.266 | 45.493 | 51.126 | 0.00 | 0.00 |
| ATOM 17870 | O    | ILE | 1192 | 65.514 | 45.407 | 51.159 | 0.00 | 0.00 |
| ATOM 17871 | N    | HIE | 1193 | 63.469 | 44.998 | 52.049 | 0.00 | 0.00 |
| ATOM 17872 | H    | HIE | 1193 | 62.486 | 45.184 | 51.914 | 0.00 | 0.00 |
| ATOM 17873 | CA   | HIE | 1193 | 63.960 | 44.444 | 53.314 | 0.00 | 0.00 |
| ATOM 17874 | HA   | HIE | 1193 | 65.003 | 44.144 | 53.211 | 0.00 | 0.00 |
| ATOM 17875 | CB   | HIE | 1193 | 64.018 | 45.614 | 54.302 | 0.00 | 0.00 |
| ATOM 17876 | HB2  | HIE | 1193 | 64.280 | 46.523 | 53.759 | 0.00 | 0.00 |
| ATOM 17877 | HB3  | HIE | 1193 | 63.037 | 45.750 | 54.756 | 0.00 | 0.00 |
| ATOM 17878 | CG   | HIE | 1193 | 64.897 | 45.447 | 55.443 | 0.00 | 0.00 |
| ATOM 17879 | ND1  | HIE | 1193 | 65.181 | 44.299 | 56.154 | 0.00 | 0.00 |
| ATOM 17880 | CE1  | HIE | 1193 | 66.168 | 44.556 | 57.064 | 0.00 | 0.00 |
| ATOM 17881 | HE1  | HIE | 1193 | 66.679 | 43.905 | 57.757 | 0.00 | 0.00 |
| ATOM 17882 | NE2  | HIE | 1193 | 66.632 | 45.800 | 56.813 | 0.00 | 0.00 |
| ATOM 17883 | HE2  | HIE | 1193 | 67.424 | 46.268 | 57.231 | 0.00 | 0.00 |
| ATOM 17884 | CD2  | HIE | 1193 | 65.823 | 46.395 | 55.860 | 0.00 | 0.00 |

|            |     |     |      |        |        |        |      |      |
|------------|-----|-----|------|--------|--------|--------|------|------|
| ATOM 17885 | HD2 | HIE | 1193 | 65.877 | 47.397 | 55.462 | 0.00 | 0.00 |
| ATOM 17886 | C   | HIE | 1193 | 63.126 | 43.254 | 53.870 | 0.00 | 0.00 |
| ATOM 17887 | O   | HIE | 1193 | 61.915 | 43.353 | 53.745 | 0.00 | 0.00 |
| ATOM 17888 | N   | GLU | 1194 | 63.718 | 42.226 | 54.501 | 0.00 | 0.00 |
| ATOM 17889 | H   | GLU | 1194 | 64.690 | 42.364 | 54.738 | 0.00 | 0.00 |
| ATOM 17890 | CA  | GLU | 1194 | 62.941 | 41.077 | 54.955 | 0.00 | 0.00 |
| ATOM 17891 | HA  | GLU | 1194 | 62.177 | 40.735 | 54.257 | 0.00 | 0.00 |
| ATOM 17892 | CB  | GLU | 1194 | 63.877 | 39.849 | 55.251 | 0.00 | 0.00 |
| ATOM 17893 | HB2 | GLU | 1194 | 63.173 | 39.061 | 55.518 | 0.00 | 0.00 |
| ATOM 17894 | HB3 | GLU | 1194 | 64.534 | 39.750 | 54.387 | 0.00 | 0.00 |
| ATOM 17895 | CG  | GLU | 1194 | 64.807 | 40.136 | 56.387 | 0.00 | 0.00 |
| ATOM 17896 | HG2 | GLU | 1194 | 65.308 | 41.091 | 56.228 | 0.00 | 0.00 |
| ATOM 17897 | HG3 | GLU | 1194 | 64.073 | 40.196 | 57.192 | 0.00 | 0.00 |
| ATOM 17898 | CD  | GLU | 1194 | 65.773 | 38.983 | 56.667 | 0.00 | 0.00 |
| ATOM 17899 | OE1 | GLU | 1194 | 65.631 | 37.876 | 56.147 | 0.00 | 0.00 |
| ATOM 17900 | OE2 | GLU | 1194 | 66.757 | 39.339 | 57.349 | 0.00 | 0.00 |
| ATOM 17901 | C   | GLU | 1194 | 62.173 | 41.517 | 56.230 | 0.00 | 0.00 |
| ATOM 17902 | O   | GLU | 1194 | 61.143 | 40.853 | 56.414 | 0.00 | 0.00 |
| ATOM 17903 | N   | ASP | 1195 | 62.619 | 42.467 | 57.026 | 0.00 | 0.00 |
| ATOM 17904 | H   | ASP | 1195 | 63.495 | 42.885 | 56.748 | 0.00 | 0.00 |
| ATOM 17905 | CA  | ASP | 1195 | 61.908 | 42.934 | 58.248 | 0.00 | 0.00 |
| ATOM 17906 | HA  | ASP | 1195 | 61.572 | 42.088 | 58.847 | 0.00 | 0.00 |
| ATOM 17907 | CB  | ASP | 1195 | 62.828 | 43.763 | 59.183 | 0.00 | 0.00 |
| ATOM 17908 | HB2 | ASP | 1195 | 63.520 | 44.467 | 58.720 | 0.00 | 0.00 |
| ATOM 17909 | HB3 | ASP | 1195 | 62.208 | 44.279 | 59.916 | 0.00 | 0.00 |
| ATOM 17910 | CG  | ASP | 1195 | 63.821 | 42.928 | 59.970 | 0.00 | 0.00 |

|      |       |     |     |      |        |        |        |      |      |
|------|-------|-----|-----|------|--------|--------|--------|------|------|
| ATOM | 17911 | OD1 | ASP | 1195 | 65.055 | 42.956 | 59.583 | 0.00 | 0.00 |
| ATOM | 17912 | OD2 | ASP | 1195 | 63.442 | 42.162 | 60.903 | 0.00 | 0.00 |
| ATOM | 17913 | C   | ASP | 1195 | 60.564 | 43.614 | 57.836 | 0.00 | 0.00 |
| ATOM | 17914 | O   | ASP | 1195 | 59.693 | 43.667 | 58.677 | 0.00 | 0.00 |
| ATOM | 17915 | N   | TRP | 1196 | 60.470 | 44.178 | 56.570 | 0.00 | 0.00 |
| ATOM | 17916 | H   | TRP | 1196 | 61.268 | 43.963 | 55.989 | 0.00 | 0.00 |
| ATOM | 17917 | CA  | TRP | 1196 | 59.253 | 44.875 | 56.029 | 0.00 | 0.00 |
| ATOM | 17918 | HA  | TRP | 1196 | 58.510 | 44.903 | 56.827 | 0.00 | 0.00 |
| ATOM | 17919 | CB  | TRP | 1196 | 59.583 | 46.293 | 55.552 | 0.00 | 0.00 |
| ATOM | 17920 | HB2 | TRP | 1196 | 60.551 | 46.326 | 55.051 | 0.00 | 0.00 |
| ATOM | 17921 | HB3 | TRP | 1196 | 58.946 | 46.534 | 54.701 | 0.00 | 0.00 |
| ATOM | 17922 | CG  | TRP | 1196 | 59.509 | 47.476 | 56.531 | 0.00 | 0.00 |
| ATOM | 17923 | CD1 | TRP | 1196 | 60.444 | 48.459 | 56.665 | 0.00 | 0.00 |
| ATOM | 17924 | HD1 | TRP | 1196 | 61.282 | 48.499 | 55.986 | 0.00 | 0.00 |
| ATOM | 17925 | NE1 | TRP | 1196 | 59.989 | 49.479 | 57.527 | 0.00 | 0.00 |
| ATOM | 17926 | HE1 | TRP | 1196 | 60.422 | 50.363 | 57.751 | 0.00 | 0.00 |
| ATOM | 17927 | CE2 | TRP | 1196 | 58.643 | 49.203 | 57.942 | 0.00 | 0.00 |
| ATOM | 17928 | CZ2 | TRP | 1196 | 57.725 | 49.923 | 58.651 | 0.00 | 0.00 |
| ATOM | 17929 | HZ2 | TRP | 1196 | 58.028 | 50.804 | 59.197 | 0.00 | 0.00 |
| ATOM | 17930 | CH2 | TRP | 1196 | 56.427 | 49.364 | 58.775 | 0.00 | 0.00 |
| ATOM | 17931 | HH2 | TRP | 1196 | 55.645 | 49.776 | 59.397 | 0.00 | 0.00 |
| ATOM | 17932 | CZ3 | TRP | 1196 | 56.088 | 48.211 | 58.116 | 0.00 | 0.00 |
| ATOM | 17933 | HZ3 | TRP | 1196 | 55.064 | 47.885 | 58.219 | 0.00 | 0.00 |
| ATOM | 17934 | CE3 | TRP | 1196 | 57.015 | 47.486 | 57.296 | 0.00 | 0.00 |
| ATOM | 17935 | HE3 | TRP | 1196 | 56.784 | 46.542 | 56.825 | 0.00 | 0.00 |
| ATOM | 17936 | CD2 | TRP | 1196 | 58.346 | 47.960 | 57.288 | 0.00 | 0.00 |

|            |     |     |      |        |        |        |      |      |
|------------|-----|-----|------|--------|--------|--------|------|------|
| ATOM 17937 | C   | TRP | 1196 | 58.498 | 44.126 | 54.868 | 0.00 | 0.00 |
| ATOM 17938 | O   | TRP | 1196 | 57.447 | 44.574 | 54.460 | 0.00 | 0.00 |
| ATOM 17939 | N   | GLY | 1197 | 59.105 | 43.089 | 54.235 | 0.00 | 0.00 |
| ATOM 17940 | H   | GLY | 1197 | 60.114 | 43.035 | 54.230 | 0.00 | 0.00 |
| ATOM 17941 | CA  | GLY | 1197 | 58.301 | 42.305 | 53.245 | 0.00 | 0.00 |
| ATOM 17942 | HA2 | GLY | 1197 | 57.263 | 42.387 | 53.568 | 0.00 | 0.00 |
| ATOM 17943 | HA3 | GLY | 1197 | 58.329 | 42.926 | 52.350 | 0.00 | 0.00 |
| ATOM 17944 | C   | GLY | 1197 | 58.686 | 40.876 | 52.998 | 0.00 | 0.00 |
| ATOM 17945 | O   | GLY | 1197 | 59.866 | 40.550 | 52.918 | 0.00 | 0.00 |
| ATOM 17946 | N   | ALA | 1198 | 57.702 | 40.025 | 52.604 | 0.00 | 0.00 |
| ATOM 17947 | H   | ALA | 1198 | 56.791 | 40.433 | 52.759 | 0.00 | 0.00 |
| ATOM 17948 | CA  | ALA | 1198 | 57.753 | 38.598 | 52.291 | 0.00 | 0.00 |
| ATOM 17949 | HA  | ALA | 1198 | 58.674 | 38.178 | 52.695 | 0.00 | 0.00 |
| ATOM 17950 | CB  | ALA | 1198 | 56.585 | 38.000 | 53.061 | 0.00 | 0.00 |
| ATOM 17951 | HB1 | ALA | 1198 | 55.607 | 38.311 | 52.693 | 0.00 | 0.00 |
| ATOM 17952 | HB2 | ALA | 1198 | 56.664 | 36.914 | 53.031 | 0.00 | 0.00 |
| ATOM 17953 | HB3 | ALA | 1198 | 56.685 | 38.387 | 54.075 | 0.00 | 0.00 |
| ATOM 17954 | C   | ALA | 1198 | 57.662 | 38.194 | 50.789 | 0.00 | 0.00 |
| ATOM 17955 | O   | ALA | 1198 | 57.829 | 36.994 | 50.415 | 0.00 | 0.00 |
| ATOM 17956 | N   | THR | 1199 | 57.519 | 39.154 | 49.905 | 0.00 | 0.00 |
| ATOM 17957 | H   | THR | 1199 | 57.481 | 40.079 | 50.309 | 0.00 | 0.00 |
| ATOM 17958 | CA  | THR | 1199 | 57.095 | 38.927 | 48.521 | 0.00 | 0.00 |
| ATOM 17959 | HA  | THR | 1199 | 57.008 | 37.848 | 48.394 | 0.00 | 0.00 |
| ATOM 17960 | CB  | THR | 1199 | 55.741 | 39.579 | 48.072 | 0.00 | 0.00 |
| ATOM 17961 | HB  | THR | 1199 | 55.378 | 38.895 | 47.305 | 0.00 | 0.00 |
| ATOM 17962 | CG2 | THR | 1199 | 54.714 | 39.720 | 49.183 | 0.00 | 0.00 |

|            |      |     |      |        |        |        |      |      |
|------------|------|-----|------|--------|--------|--------|------|------|
| ATOM 17963 | 1HG2 | THR | 1199 | 54.702 | 38.773 | 49.721 | 0.00 | 0.00 |
| ATOM 17964 | 2HG2 | THR | 1199 | 55.119 | 40.492 | 49.837 | 0.00 | 0.00 |
| ATOM 17965 | 3HG2 | THR | 1199 | 53.734 | 40.007 | 48.802 | 0.00 | 0.00 |
| ATOM 17966 | OG1  | THR | 1199 | 55.884 | 40.737 | 47.342 | 0.00 | 0.00 |
| ATOM 17967 | HG1  | THR | 1199 | 55.310 | 41.396 | 47.741 | 0.00 | 0.00 |
| ATOM 17968 | C    | THR | 1199 | 58.221 | 39.376 | 47.551 | 0.00 | 0.00 |
| ATOM 17969 | O    | THR | 1199 | 59.004 | 40.323 | 47.866 | 0.00 | 0.00 |
| ATOM 17970 | N    | PRO | 1200 | 58.209 | 38.769 | 46.297 | 0.00 | 0.00 |
| ATOM 17971 | CD   | PRO | 1200 | 57.332 | 37.666 | 45.842 | 0.00 | 0.00 |
| ATOM 17972 | HD2  | PRO | 1200 | 57.464 | 36.749 | 46.416 | 0.00 | 0.00 |
| ATOM 17973 | HD3  | PRO | 1200 | 56.308 | 38.039 | 45.842 | 0.00 | 0.00 |
| ATOM 17974 | CG   | PRO | 1200 | 57.705 | 37.407 | 44.402 | 0.00 | 0.00 |
| ATOM 17975 | HG2  | PRO | 1200 | 57.631 | 36.377 | 44.050 | 0.00 | 0.00 |
| ATOM 17976 | HG3  | PRO | 1200 | 56.948 | 37.914 | 43.804 | 0.00 | 0.00 |
| ATOM 17977 | CB   | PRO | 1200 | 59.158 | 37.935 | 44.328 | 0.00 | 0.00 |
| ATOM 17978 | HB2  | PRO | 1200 | 59.885 | 37.214 | 44.702 | 0.00 | 0.00 |
| ATOM 17979 | HB3  | PRO | 1200 | 59.501 | 38.235 | 43.337 | 0.00 | 0.00 |
| ATOM 17980 | CA   | PRO | 1200 | 59.176 | 39.182 | 45.189 | 0.00 | 0.00 |
| ATOM 17981 | HA   | PRO | 1200 | 60.201 | 39.416 | 45.476 | 0.00 | 0.00 |
| ATOM 17982 | C    | PRO | 1200 | 58.685 | 40.424 | 44.477 | 0.00 | 0.00 |
| ATOM 17983 | O    | PRO | 1200 | 59.408 | 41.155 | 43.764 | 0.00 | 0.00 |
| ATOM 17984 | N    | ALA | 1201 | 57.408 | 40.791 | 44.715 | 0.00 | 0.00 |
| ATOM 17985 | H    | ALA | 1201 | 56.809 | 40.413 | 45.436 | 0.00 | 0.00 |
| ATOM 17986 | CA   | ALA | 1201 | 56.788 | 41.904 | 43.970 | 0.00 | 0.00 |
| ATOM 17987 | HA   | ALA | 1201 | 57.087 | 41.660 | 42.951 | 0.00 | 0.00 |
| ATOM 17988 | CB   | ALA | 1201 | 55.266 | 41.799 | 43.922 | 0.00 | 0.00 |

|      |       |      |     |      |        |        |        |      |      |
|------|-------|------|-----|------|--------|--------|--------|------|------|
| ATOM | 17989 | HB1  | ALA | 1201 | 54.958 | 40.803 | 43.604 | 0.00 | 0.00 |
| ATOM | 17990 | HB2  | ALA | 1201 | 54.841 | 42.060 | 44.891 | 0.00 | 0.00 |
| ATOM | 17991 | HB3  | ALA | 1201 | 54.967 | 42.584 | 43.227 | 0.00 | 0.00 |
| ATOM | 17992 | C    | ALA | 1201 | 57.185 | 43.272 | 44.467 | 0.00 | 0.00 |
| ATOM | 17993 | O    | ALA | 1201 | 56.896 | 44.226 | 43.754 | 0.00 | 0.00 |
| ATOM | 17994 | N    | ALA | 1202 | 57.692 | 43.402 | 45.682 | 0.00 | 0.00 |
| ATOM | 17995 | H    | ALA | 1202 | 57.777 | 42.529 | 46.181 | 0.00 | 0.00 |
| ATOM | 17996 | CA   | ALA | 1202 | 58.247 | 44.663 | 46.194 | 0.00 | 0.00 |
| ATOM | 17997 | HA   | ALA | 1202 | 57.534 | 45.488 | 46.176 | 0.00 | 0.00 |
| ATOM | 17998 | CB   | ALA | 1202 | 58.545 | 44.632 | 47.701 | 0.00 | 0.00 |
| ATOM | 17999 | HB1  | ALA | 1202 | 59.108 | 45.503 | 48.037 | 0.00 | 0.00 |
| ATOM | 18000 | HB2  | ALA | 1202 | 57.607 | 44.679 | 48.255 | 0.00 | 0.00 |
| ATOM | 18001 | HB3  | ALA | 1202 | 59.037 | 43.686 | 47.929 | 0.00 | 0.00 |
| ATOM | 18002 | C    | ALA | 1202 | 59.499 | 45.010 | 45.355 | 0.00 | 0.00 |
| ATOM | 18003 | O    | ALA | 1202 | 59.570 | 46.058 | 44.823 | 0.00 | 0.00 |
| ATOM | 18004 | N    | ILE | 1203 | 60.336 | 43.945 | 45.097 | 0.00 | 0.00 |
| ATOM | 18005 | H    | ILE | 1203 | 60.247 | 43.044 | 45.545 | 0.00 | 0.00 |
| ATOM | 18006 | CA   | ILE | 1203 | 61.498 | 44.129 | 44.139 | 0.00 | 0.00 |
| ATOM | 18007 | HA   | ILE | 1203 | 62.038 | 44.948 | 44.613 | 0.00 | 0.00 |
| ATOM | 18008 | CB   | ILE | 1203 | 62.325 | 42.792 | 43.992 | 0.00 | 0.00 |
| ATOM | 18009 | HB   | ILE | 1203 | 61.941 | 42.190 | 43.168 | 0.00 | 0.00 |
| ATOM | 18010 | CG2  | ILE | 1203 | 63.696 | 43.108 | 43.540 | 0.00 | 0.00 |
| ATOM | 18011 | 1HG2 | ILE | 1203 | 64.195 | 43.705 | 44.304 | 0.00 | 0.00 |
| ATOM | 18012 | 2HG2 | ILE | 1203 | 64.126 | 42.133 | 43.313 | 0.00 | 0.00 |
| ATOM | 18013 | 3HG2 | ILE | 1203 | 63.668 | 43.593 | 42.565 | 0.00 | 0.00 |
| ATOM | 18014 | CG1  | ILE | 1203 | 62.425 | 41.875 | 45.244 | 0.00 | 0.00 |



|            |      |     |      |        |        |        |      |      |
|------------|------|-----|------|--------|--------|--------|------|------|
| ATOM 18015 | 2HG1 | ILE | 1203 | 63.185 | 42.307 | 45.896 | 0.00 | 0.00 |
| ATOM 18016 | 3HG1 | ILE | 1203 | 61.447 | 41.822 | 45.723 | 0.00 | 0.00 |
| ATOM 18017 | CD1  | ILE | 1203 | 62.966 | 40.398 | 44.892 | 0.00 | 0.00 |
| ATOM 18018 | 1HD1 | ILE | 1203 | 62.174 | 39.780 | 44.470 | 0.00 | 0.00 |
| ATOM 18019 | 2HD1 | ILE | 1203 | 63.862 | 40.438 | 44.273 | 0.00 | 0.00 |
| ATOM 18020 | 3HD1 | ILE | 1203 | 63.367 | 40.001 | 45.825 | 0.00 | 0.00 |
| ATOM 18021 | C    | ILE | 1203 | 61.006 | 44.615 | 42.738 | 0.00 | 0.00 |
| ATOM 18022 | O    | ILE | 1203 | 61.413 | 45.713 | 42.259 | 0.00 | 0.00 |
| ATOM 18023 | N    | ASP | 1204 | 60.118 | 43.956 | 42.039 | 0.00 | 0.00 |
| ATOM 18024 | H    | ASP | 1204 | 59.898 | 43.020 | 42.346 | 0.00 | 0.00 |
| ATOM 18025 | CA   | ASP | 1204 | 59.828 | 44.308 | 40.635 | 0.00 | 0.00 |
| ATOM 18026 | HA   | ASP | 1204 | 60.781 | 44.411 | 40.116 | 0.00 | 0.00 |
| ATOM 18027 | CB   | ASP | 1204 | 59.000 | 43.153 | 40.003 | 0.00 | 0.00 |
| ATOM 18028 | HB2  | ASP | 1204 | 59.624 | 42.273 | 39.848 | 0.00 | 0.00 |
| ATOM 18029 | HB3  | ASP | 1204 | 58.126 | 42.904 | 40.605 | 0.00 | 0.00 |
| ATOM 18030 | CG   | ASP | 1204 | 58.401 | 43.612 | 38.634 | 0.00 | 0.00 |
| ATOM 18031 | OD1  | ASP | 1204 | 59.278 | 43.716 | 37.784 | 0.00 | 0.00 |
| ATOM 18032 | OD2  | ASP | 1204 | 57.232 | 43.641 | 38.355 | 0.00 | 0.00 |
| ATOM 18033 | C    | ASP | 1204 | 59.092 | 45.588 | 40.455 | 0.00 | 0.00 |
| ATOM 18034 | O    | ASP | 1204 | 59.222 | 46.370 | 39.498 | 0.00 | 0.00 |
| ATOM 18035 | N    | CYS | 1205 | 58.179 | 45.869 | 41.368 | 0.00 | 0.00 |
| ATOM 18036 | H    | CYS | 1205 | 58.005 | 45.215 | 42.118 | 0.00 | 0.00 |
| ATOM 18037 | CA   | CYS | 1205 | 57.485 | 47.201 | 41.695 | 0.00 | 0.00 |
| ATOM 18038 | HA   | CYS | 1205 | 56.903 | 47.496 | 40.823 | 0.00 | 0.00 |
| ATOM 18039 | CB   | CYS | 1205 | 56.416 | 47.038 | 42.758 | 0.00 | 0.00 |
| ATOM 18040 | HB2  | CYS | 1205 | 56.770 | 46.564 | 43.673 | 0.00 | 0.00 |

|      |       |      |     |      |        |        |        |      |      |
|------|-------|------|-----|------|--------|--------|--------|------|------|
| ATOM | 18041 | HB3  | CYS | 1205 | 56.011 | 48.003 | 43.063 | 0.00 | 0.00 |
| ATOM | 18042 | SG   | CYS | 1205 | 55.013 | 45.996 | 42.198 | 0.00 | 0.00 |
| ATOM | 18043 | HG   | CYS | 1205 | 55.666 | 44.898 | 42.591 | 0.00 | 0.00 |
| ATOM | 18044 | C    | CYS | 1205 | 58.340 | 48.364 | 41.984 | 0.00 | 0.00 |
| ATOM | 18045 | O    | CYS | 1205 | 58.203 | 49.453 | 41.441 | 0.00 | 0.00 |
| ATOM | 18046 | N    | ALA | 1206 | 59.287 | 48.210 | 42.926 | 0.00 | 0.00 |
| ATOM | 18047 | H    | ALA | 1206 | 59.454 | 47.301 | 43.332 | 0.00 | 0.00 |
| ATOM | 18048 | CA   | ALA | 1206 | 60.315 | 49.204 | 43.182 | 0.00 | 0.00 |
| ATOM | 18049 | HA   | ALA | 1206 | 59.764 | 50.123 | 43.382 | 0.00 | 0.00 |
| ATOM | 18050 | CB   | ALA | 1206 | 61.102 | 48.787 | 44.418 | 0.00 | 0.00 |
| ATOM | 18051 | HB1  | ALA | 1206 | 60.347 | 48.536 | 45.162 | 0.00 | 0.00 |
| ATOM | 18052 | HB2  | ALA | 1206 | 61.787 | 48.025 | 44.045 | 0.00 | 0.00 |
| ATOM | 18053 | HB3  | ALA | 1206 | 61.753 | 49.621 | 44.678 | 0.00 | 0.00 |
| ATOM | 18054 | C    | ALA | 1206 | 61.138 | 49.503 | 41.913 | 0.00 | 0.00 |
| ATOM | 18055 | O    | ALA | 1206 | 61.260 | 50.701 | 41.536 | 0.00 | 0.00 |
| ATOM | 18056 | N    | LEU | 1207 | 61.425 | 48.538 | 41.109 | 0.00 | 0.00 |
| ATOM | 18057 | H    | LEU | 1207 | 61.294 | 47.571 | 41.370 | 0.00 | 0.00 |
| ATOM | 18058 | CA   | LEU | 1207 | 62.136 | 48.771 | 39.865 | 0.00 | 0.00 |
| ATOM | 18059 | HA   | LEU | 1207 | 62.896 | 49.544 | 39.981 | 0.00 | 0.00 |
| ATOM | 18060 | CB   | LEU | 1207 | 62.916 | 47.522 | 39.478 | 0.00 | 0.00 |
| ATOM | 18061 | HB2  | LEU | 1207 | 62.254 | 46.657 | 39.452 | 0.00 | 0.00 |
| ATOM | 18062 | HB3  | LEU | 1207 | 63.470 | 47.665 | 38.551 | 0.00 | 0.00 |
| ATOM | 18063 | CG   | LEU | 1207 | 64.051 | 47.035 | 40.407 | 0.00 | 0.00 |
| ATOM | 18064 | HG   | LEU | 1207 | 63.723 | 47.147 | 41.441 | 0.00 | 0.00 |
| ATOM | 18065 | CD1  | LEU | 1207 | 64.404 | 45.608 | 40.055 | 0.00 | 0.00 |
| ATOM | 18066 | 1HD1 | LEU | 1207 | 65.359 | 45.273 | 40.461 | 0.00 | 0.00 |

|            |      |     |      |        |        |        |      |      |
|------------|------|-----|------|--------|--------|--------|------|------|
| ATOM 18067 | 2HD1 | LEU | 1207 | 63.541 | 45.101 | 40.486 | 0.00 | 0.00 |
| ATOM 18068 | 3HD1 | LEU | 1207 | 64.237 | 45.574 | 38.978 | 0.00 | 0.00 |
| ATOM 18069 | CD2  | LEU | 1207 | 65.353 | 47.825 | 40.248 | 0.00 | 0.00 |
| ATOM 18070 | 1HD2 | LEU | 1207 | 65.179 | 48.856 | 40.556 | 0.00 | 0.00 |
| ATOM 18071 | 2HD2 | LEU | 1207 | 66.110 | 47.395 | 40.904 | 0.00 | 0.00 |
| ATOM 18072 | 3HD2 | LEU | 1207 | 65.752 | 47.850 | 39.234 | 0.00 | 0.00 |
| ATOM 18073 | C    | LEU | 1207 | 61.157 | 49.249 | 38.738 | 0.00 | 0.00 |
| ATOM 18074 | O    | LEU | 1207 | 61.569 | 49.977 | 37.878 | 0.00 | 0.00 |
| ATOM 18075 | N    | THR | 1208 | 59.849 | 49.193 | 38.923 | 0.00 | 0.00 |
| ATOM 18076 | H    | THR | 1208 | 59.541 | 48.591 | 39.673 | 0.00 | 0.00 |
| ATOM 18077 | CA   | THR | 1208 | 58.852 | 49.686 | 37.941 | 0.00 | 0.00 |
| ATOM 18078 | HA   | THR | 1208 | 59.251 | 49.614 | 36.930 | 0.00 | 0.00 |
| ATOM 18079 | CB   | THR | 1208 | 57.526 | 48.856 | 38.004 | 0.00 | 0.00 |
| ATOM 18080 | HB   | THR | 1208 | 57.244 | 48.595 | 39.025 | 0.00 | 0.00 |
| ATOM 18081 | CG2  | THR | 1208 | 56.309 | 49.626 | 37.411 | 0.00 | 0.00 |
| ATOM 18082 | 1HG2 | THR | 1208 | 55.413 | 49.005 | 37.441 | 0.00 | 0.00 |
| ATOM 18083 | 2HG2 | THR | 1208 | 56.209 | 50.573 | 37.942 | 0.00 | 0.00 |
| ATOM 18084 | 3HG2 | THR | 1208 | 56.586 | 49.899 | 36.393 | 0.00 | 0.00 |
| ATOM 18085 | OG1  | THR | 1208 | 57.887 | 47.615 | 37.429 | 0.00 | 0.00 |
| ATOM 18086 | HG1  | THR | 1208 | 58.269 | 47.015 | 38.074 | 0.00 | 0.00 |
| ATOM 18087 | C    | THR | 1208 | 58.590 | 51.197 | 38.048 | 0.00 | 0.00 |
| ATOM 18088 | O    | THR | 1208 | 58.408 | 51.908 | 37.069 | 0.00 | 0.00 |
| ATOM 18089 | N    | VAL | 1209 | 58.803 | 51.658 | 39.257 | 0.00 | 0.00 |
| ATOM 18090 | H    | VAL | 1209 | 58.849 | 50.936 | 39.961 | 0.00 | 0.00 |
| ATOM 18091 | CA   | VAL | 1209 | 58.859 | 53.113 | 39.545 | 0.00 | 0.00 |
| ATOM 18092 | HA   | VAL | 1209 | 58.271 | 53.669 | 38.814 | 0.00 | 0.00 |

|            |               |        |        |        |      |      |
|------------|---------------|--------|--------|--------|------|------|
| ATOM 18093 | CB VAL 1209   | 58.363 | 53.508 | 40.955 | 0.00 | 0.00 |
| ATOM 18094 | HB VAL 1209   | 59.058 | 53.015 | 41.634 | 0.00 | 0.00 |
| ATOM 18095 | CG1 VAL 1209  | 58.412 | 55.026 | 41.289 | 0.00 | 0.00 |
| ATOM 18096 | 1HG1 VAL 1209 | 58.022 | 55.168 | 42.296 | 0.00 | 0.00 |
| ATOM 18097 | 2HG1 VAL 1209 | 59.455 | 55.342 | 41.313 | 0.00 | 0.00 |
| ATOM 18098 | 3HG1 VAL 1209 | 57.880 | 55.663 | 40.582 | 0.00 | 0.00 |
| ATOM 18099 | CG2 VAL 1209  | 57.003 | 52.923 | 41.312 | 0.00 | 0.00 |
| ATOM 18100 | 1HG2 VAL 1209 | 56.937 | 51.859 | 41.081 | 0.00 | 0.00 |
| ATOM 18101 | 2HG2 VAL 1209 | 56.798 | 53.097 | 42.368 | 0.00 | 0.00 |
| ATOM 18102 | 3HG2 VAL 1209 | 56.234 | 53.411 | 40.712 | 0.00 | 0.00 |
| ATOM 18103 | C VAL 1209    | 60.281 | 53.686 | 39.361 | 0.00 | 0.00 |
| ATOM 18104 | O VAL 1209    | 60.350 | 54.783 | 38.804 | 0.00 | 0.00 |
| ATOM 18105 | N ALA 1210    | 61.386 | 52.919 | 39.546 | 0.00 | 0.00 |
| ATOM 18106 | H ALA 1210    | 61.329 | 52.025 | 40.011 | 0.00 | 0.00 |
| ATOM 18107 | CA ALA 1210   | 62.692 | 53.345 | 39.064 | 0.00 | 0.00 |
| ATOM 18108 | HA ALA 1210   | 63.074 | 54.256 | 39.525 | 0.00 | 0.00 |
| ATOM 18109 | CB ALA 1210   | 63.767 | 52.240 | 39.421 | 0.00 | 0.00 |
| ATOM 18110 | HB1 ALA 1210  | 64.750 | 52.712 | 39.393 | 0.00 | 0.00 |
| ATOM 18111 | HB2 ALA 1210  | 63.621 | 51.852 | 40.429 | 0.00 | 0.00 |
| ATOM 18112 | HB3 ALA 1210  | 63.820 | 51.374 | 38.761 | 0.00 | 0.00 |
| ATOM 18113 | C ALA 1210    | 62.735 | 53.652 | 37.516 | 0.00 | 0.00 |
| ATOM 18114 | O ALA 1210    | 63.340 | 54.651 | 37.140 | 0.00 | 0.00 |
| ATOM 18115 | N ASP 1211    | 62.074 | 52.816 | 36.728 | 0.00 | 0.00 |
| ATOM 18116 | H ASP 1211    | 61.819 | 51.934 | 37.150 | 0.00 | 0.00 |
| ATOM 18117 | CA ASP 1211   | 61.859 | 52.951 | 35.272 | 0.00 | 0.00 |
| ATOM 18118 | HA ASP 1211   | 62.827 | 53.065 | 34.783 | 0.00 | 0.00 |

|      |       |     |     |      |        |        |        |      |      |
|------|-------|-----|-----|------|--------|--------|--------|------|------|
| ATOM | 18119 | CB  | ASP | 1211 | 61.162 | 51.697 | 34.682 | 0.00 | 0.00 |
| ATOM | 18120 | HB2 | ASP | 1211 | 61.622 | 50.821 | 35.140 | 0.00 | 0.00 |
| ATOM | 18121 | HB3 | ASP | 1211 | 60.148 | 51.647 | 35.078 | 0.00 | 0.00 |
| ATOM | 18122 | CG  | ASP | 1211 | 61.284 | 51.561 | 33.153 | 0.00 | 0.00 |
| ATOM | 18123 | OD1 | ASP | 1211 | 62.462 | 51.444 | 32.698 | 0.00 | 0.00 |
| ATOM | 18124 | OD2 | ASP | 1211 | 60.248 | 51.524 | 32.403 | 0.00 | 0.00 |
| ATOM | 18125 | C   | ASP | 1211 | 61.044 | 54.248 | 34.991 | 0.00 | 0.00 |
| ATOM | 18126 | O   | ASP | 1211 | 61.200 | 54.961 | 33.980 | 0.00 | 0.00 |
| ATOM | 18127 | N   | GLU | 1212 | 60.090 | 54.572 | 35.853 | 0.00 | 0.00 |
| ATOM | 18128 | H   | GLU | 1212 | 60.026 | 54.006 | 36.688 | 0.00 | 0.00 |
| ATOM | 18129 | CA  | GLU | 1212 | 59.129 | 55.664 | 35.635 | 0.00 | 0.00 |
| ATOM | 18130 | HA  | GLU | 1212 | 58.930 | 55.788 | 34.570 | 0.00 | 0.00 |
| ATOM | 18131 | CB  | GLU | 1212 | 57.777 | 55.372 | 36.347 | 0.00 | 0.00 |
| ATOM | 18132 | HB2 | GLU | 1212 | 57.519 | 54.314 | 36.387 | 0.00 | 0.00 |
| ATOM | 18133 | HB3 | GLU | 1212 | 57.904 | 55.593 | 37.407 | 0.00 | 0.00 |
| ATOM | 18134 | CG  | GLU | 1212 | 56.687 | 56.334 | 35.922 | 0.00 | 0.00 |
| ATOM | 18135 | HG2 | GLU | 1212 | 56.968 | 57.379 | 36.051 | 0.00 | 0.00 |
| ATOM | 18136 | HG3 | GLU | 1212 | 56.515 | 56.227 | 34.851 | 0.00 | 0.00 |
| ATOM | 18137 | CD  | GLU | 1212 | 55.477 | 56.026 | 36.794 | 0.00 | 0.00 |
| ATOM | 18138 | OE1 | GLU | 1212 | 55.011 | 56.919 | 37.480 | 0.00 | 0.00 |
| ATOM | 18139 | OE2 | GLU | 1212 | 54.815 | 54.948 | 36.620 | 0.00 | 0.00 |
| ATOM | 18140 | C   | GLU | 1212 | 59.634 | 57.024 | 36.211 | 0.00 | 0.00 |
| ATOM | 18141 | O   | GLU | 1212 | 59.368 | 58.061 | 35.660 | 0.00 | 0.00 |
| ATOM | 18142 | N   | MET | 1213 | 60.428 | 57.101 | 37.270 | 0.00 | 0.00 |
| ATOM | 18143 | H   | MET | 1213 | 60.634 | 56.230 | 37.737 | 0.00 | 0.00 |
| ATOM | 18144 | CA  | MET | 1213 | 60.825 | 58.319 | 38.003 | 0.00 | 0.00 |

|      |       |     |     |      |        |        |        |      |      |
|------|-------|-----|-----|------|--------|--------|--------|------|------|
| ATOM | 18145 | HA  | MET | 1213 | 60.428 | 59.161 | 37.436 | 0.00 | 0.00 |
| ATOM | 18146 | CB  | MET | 1213 | 60.174 | 58.261 | 39.391 | 0.00 | 0.00 |
| ATOM | 18147 | HB2 | MET | 1213 | 60.266 | 57.267 | 39.830 | 0.00 | 0.00 |
| ATOM | 18148 | HB3 | MET | 1213 | 60.705 | 58.891 | 40.105 | 0.00 | 0.00 |
| ATOM | 18149 | CG  | MET | 1213 | 58.764 | 58.731 | 39.267 | 0.00 | 0.00 |
| ATOM | 18150 | HG2 | MET | 1213 | 58.604 | 59.645 | 38.695 | 0.00 | 0.00 |
| ATOM | 18151 | HG3 | MET | 1213 | 58.349 | 57.939 | 38.643 | 0.00 | 0.00 |
| ATOM | 18152 | SD  | MET | 1213 | 57.824 | 59.007 | 40.769 | 0.00 | 0.00 |
| ATOM | 18153 | CE  | MET | 1213 | 56.181 | 59.248 | 40.066 | 0.00 | 0.00 |
| ATOM | 18154 | HE1 | MET | 1213 | 55.818 | 58.321 | 39.623 | 0.00 | 0.00 |
| ATOM | 18155 | HE2 | MET | 1213 | 55.580 | 59.751 | 40.824 | 0.00 | 0.00 |
| ATOM | 18156 | HE3 | MET | 1213 | 56.287 | 59.925 | 39.219 | 0.00 | 0.00 |
| ATOM | 18157 | C   | MET | 1213 | 62.314 | 58.527 | 38.134 | 0.00 | 0.00 |
| ATOM | 18158 | O   | MET | 1213 | 62.685 | 59.606 | 38.565 | 0.00 | 0.00 |
| ATOM | 18159 | N   | ASP | 1214 | 63.100 | 57.553 | 37.659 | 0.00 | 0.00 |
| ATOM | 18160 | H   | ASP | 1214 | 62.625 | 56.749 | 37.274 | 0.00 | 0.00 |
| ATOM | 18161 | CA  | ASP | 1214 | 64.511 | 57.739 | 37.690 | 0.00 | 0.00 |
| ATOM | 18162 | HA  | ASP | 1214 | 65.023 | 56.855 | 37.310 | 0.00 | 0.00 |
| ATOM | 18163 | CB  | ASP | 1214 | 64.918 | 58.861 | 36.663 | 0.00 | 0.00 |
| ATOM | 18164 | HB2 | ASP | 1214 | 64.117 | 58.972 | 35.932 | 0.00 | 0.00 |
| ATOM | 18165 | HB3 | ASP | 1214 | 65.108 | 59.800 | 37.184 | 0.00 | 0.00 |
| ATOM | 18166 | CG  | ASP | 1214 | 66.229 | 58.512 | 35.716 | 0.00 | 0.00 |
| ATOM | 18167 | OD1 | ASP | 1214 | 67.403 | 58.738 | 36.201 | 0.00 | 0.00 |
| ATOM | 18168 | OD2 | ASP | 1214 | 66.108 | 58.060 | 34.516 | 0.00 | 0.00 |
| ATOM | 18169 | C   | ASP | 1214 | 65.235 | 57.896 | 39.014 | 0.00 | 0.00 |
| ATOM | 18170 | O   | ASP | 1214 | 66.178 | 58.685 | 39.184 | 0.00 | 0.00 |

|      |       |      |     |      |        |        |        |      |      |
|------|-------|------|-----|------|--------|--------|--------|------|------|
| ATOM | 18171 | N    | ILE | 1215 | 64.803 | 57.054 | 39.976 | 0.00 | 0.00 |
| ATOM | 18172 | H    | ILE | 1215 | 64.029 | 56.438 | 39.771 | 0.00 | 0.00 |
| ATOM | 18173 | CA   | ILE | 1215 | 65.380 | 56.896 | 41.368 | 0.00 | 0.00 |
| ATOM | 18174 | HA   | ILE | 1215 | 66.145 | 57.670 | 41.425 | 0.00 | 0.00 |
| ATOM | 18175 | CB   | ILE | 1215 | 64.270 | 57.256 | 42.325 | 0.00 | 0.00 |
| ATOM | 18176 | HB   | ILE | 1215 | 64.686 | 56.999 | 43.300 | 0.00 | 0.00 |
| ATOM | 18177 | CG2  | ILE | 1215 | 64.035 | 58.795 | 42.472 | 0.00 | 0.00 |
| ATOM | 18178 | 1HG2 | ILE | 1215 | 63.534 | 59.090 | 41.550 | 0.00 | 0.00 |
| ATOM | 18179 | 2HG2 | ILE | 1215 | 63.412 | 58.973 | 43.350 | 0.00 | 0.00 |
| ATOM | 18180 | 3HG2 | ILE | 1215 | 65.035 | 59.226 | 42.522 | 0.00 | 0.00 |
| ATOM | 18181 | CG1  | ILE | 1215 | 62.953 | 56.454 | 42.134 | 0.00 | 0.00 |
| ATOM | 18182 | 2HG1 | ILE | 1215 | 62.038 | 57.026 | 42.289 | 0.00 | 0.00 |
| ATOM | 18183 | 3HG1 | ILE | 1215 | 62.843 | 56.034 | 41.134 | 0.00 | 0.00 |
| ATOM | 18184 | CD1  | ILE | 1215 | 62.822 | 55.333 | 43.195 | 0.00 | 0.00 |
| ATOM | 18185 | 1HD1 | ILE | 1215 | 63.521 | 54.508 | 43.055 | 0.00 | 0.00 |
| ATOM | 18186 | 2HD1 | ILE | 1215 | 62.972 | 55.788 | 44.174 | 0.00 | 0.00 |
| ATOM | 18187 | 3HD1 | ILE | 1215 | 61.786 | 55.006 | 43.285 | 0.00 | 0.00 |
| ATOM | 18188 | C    | ILE | 1215 | 66.118 | 55.585 | 41.522 | 0.00 | 0.00 |
| ATOM | 18189 | O    | ILE | 1215 | 65.642 | 54.601 | 40.997 | 0.00 | 0.00 |
| ATOM | 18190 | N    | GLN | 1216 | 67.195 | 55.446 | 42.392 | 0.00 | 0.00 |
| ATOM | 18191 | H    | GLN | 1216 | 67.381 | 56.302 | 42.895 | 0.00 | 0.00 |
| ATOM | 18192 | CA   | GLN | 1216 | 67.833 | 54.198 | 42.688 | 0.00 | 0.00 |
| ATOM | 18193 | HA   | GLN | 1216 | 68.048 | 53.706 | 41.740 | 0.00 | 0.00 |
| ATOM | 18194 | CB   | GLN | 1216 | 69.235 | 54.429 | 43.417 | 0.00 | 0.00 |
| ATOM | 18195 | HB2  | GLN | 1216 | 69.669 | 55.253 | 42.851 | 0.00 | 0.00 |
| ATOM | 18196 | HB3  | GLN | 1216 | 68.994 | 54.842 | 44.396 | 0.00 | 0.00 |

|      |       |      |     |      |        |        |        |      |      |
|------|-------|------|-----|------|--------|--------|--------|------|------|
| ATOM | 18197 | CG   | GLN | 1216 | 70.174 | 53.185 | 43.543 | 0.00 | 0.00 |
| ATOM | 18198 | HG2  | GLN | 1216 | 71.099 | 53.510 | 44.020 | 0.00 | 0.00 |
| ATOM | 18199 | HG3  | GLN | 1216 | 69.693 | 52.513 | 44.254 | 0.00 | 0.00 |
| ATOM | 18200 | CD   | GLN | 1216 | 70.372 | 52.568 | 42.129 | 0.00 | 0.00 |
| ATOM | 18201 | OE1  | GLN | 1216 | 69.924 | 51.489 | 41.783 | 0.00 | 0.00 |
| ATOM | 18202 | NE2  | GLN | 1216 | 71.018 | 53.194 | 41.169 | 0.00 | 0.00 |
| ATOM | 18203 | 1HE2 | GLN | 1216 | 71.446 | 52.612 | 40.463 | 0.00 | 0.00 |
| ATOM | 18204 | 2HE2 | GLN | 1216 | 71.460 | 54.067 | 41.418 | 0.00 | 0.00 |
| ATOM | 18205 | C    | GLN | 1216 | 67.038 | 53.212 | 43.524 | 0.00 | 0.00 |
| ATOM | 18206 | O    | GLN | 1216 | 66.107 | 53.635 | 44.131 | 0.00 | 0.00 |
| ATOM | 18207 | N    | VAL | 1217 | 67.236 | 51.913 | 43.432 | 0.00 | 0.00 |
| ATOM | 18208 | H    | VAL | 1217 | 67.832 | 51.483 | 42.740 | 0.00 | 0.00 |
| ATOM | 18209 | CA   | VAL | 1217 | 66.604 | 50.969 | 44.338 | 0.00 | 0.00 |
| ATOM | 18210 | HA   | VAL | 1217 | 66.030 | 51.466 | 45.119 | 0.00 | 0.00 |
| ATOM | 18211 | CB   | VAL | 1217 | 65.652 | 50.108 | 43.554 | 0.00 | 0.00 |
| ATOM | 18212 | HB   | VAL | 1217 | 66.285 | 49.693 | 42.770 | 0.00 | 0.00 |
| ATOM | 18213 | CG1  | VAL | 1217 | 64.983 | 49.012 | 44.349 | 0.00 | 0.00 |
| ATOM | 18214 | 1HG1 | VAL | 1217 | 64.325 | 49.435 | 45.109 | 0.00 | 0.00 |
| ATOM | 18215 | 2HG1 | VAL | 1217 | 64.186 | 48.461 | 43.851 | 0.00 | 0.00 |
| ATOM | 18216 | 3HG1 | VAL | 1217 | 65.724 | 48.307 | 44.726 | 0.00 | 0.00 |
| ATOM | 18217 | CG2  | VAL | 1217 | 64.514 | 50.933 | 42.911 | 0.00 | 0.00 |
| ATOM | 18218 | 1HG2 | VAL | 1217 | 63.878 | 51.502 | 43.589 | 0.00 | 0.00 |
| ATOM | 18219 | 2HG2 | VAL | 1217 | 65.034 | 51.673 | 42.303 | 0.00 | 0.00 |
| ATOM | 18220 | 3HG2 | VAL | 1217 | 63.927 | 50.339 | 42.211 | 0.00 | 0.00 |
| ATOM | 18221 | C    | VAL | 1217 | 67.605 | 50.114 | 45.141 | 0.00 | 0.00 |
| ATOM | 18222 | O    | VAL | 1217 | 68.669 | 49.788 | 44.568 | 0.00 | 0.00 |



|      |       |      |     |      |        |        |        |      |      |
|------|-------|------|-----|------|--------|--------|--------|------|------|
| ATOM | 18223 | N    | ALA | 1218 | 67.324 | 49.796 | 46.433 | 0.00 | 0.00 |
| ATOM | 18224 | H    | ALA | 1218 | 66.436 | 50.081 | 46.820 | 0.00 | 0.00 |
| ATOM | 18225 | CA   | ALA | 1218 | 68.255 | 48.979 | 47.212 | 0.00 | 0.00 |
| ATOM | 18226 | HA   | ALA | 1218 | 68.993 | 48.556 | 46.529 | 0.00 | 0.00 |
| ATOM | 18227 | CB   | ALA | 1218 | 68.978 | 49.929 | 48.212 | 0.00 | 0.00 |
| ATOM | 18228 | HB1  | ALA | 1218 | 69.145 | 50.938 | 47.834 | 0.00 | 0.00 |
| ATOM | 18229 | HB2  | ALA | 1218 | 68.373 | 50.056 | 49.110 | 0.00 | 0.00 |
| ATOM | 18230 | HB3  | ALA | 1218 | 69.959 | 49.552 | 48.498 | 0.00 | 0.00 |
| ATOM | 18231 | C    | ALA | 1218 | 67.600 | 47.730 | 47.866 | 0.00 | 0.00 |
| ATOM | 18232 | O    | ALA | 1218 | 66.379 | 47.614 | 47.877 | 0.00 | 0.00 |
| ATOM | 18233 | N    | LEU | 1219 | 68.455 | 46.784 | 48.336 | 0.00 | 0.00 |
| ATOM | 18234 | H    | LEU | 1219 | 69.426 | 47.059 | 48.369 | 0.00 | 0.00 |
| ATOM | 18235 | CA   | LEU | 1219 | 68.044 | 45.447 | 48.807 | 0.00 | 0.00 |
| ATOM | 18236 | HA   | LEU | 1219 | 66.982 | 45.425 | 49.052 | 0.00 | 0.00 |
| ATOM | 18237 | CB   | LEU | 1219 | 68.206 | 44.533 | 47.555 | 0.00 | 0.00 |
| ATOM | 18238 | HB2  | LEU | 1219 | 67.591 | 44.782 | 46.690 | 0.00 | 0.00 |
| ATOM | 18239 | HB3  | LEU | 1219 | 69.247 | 44.620 | 47.243 | 0.00 | 0.00 |
| ATOM | 18240 | CG   | LEU | 1219 | 67.956 | 43.108 | 47.829 | 0.00 | 0.00 |
| ATOM | 18241 | HG   | LEU | 1219 | 68.608 | 42.795 | 48.644 | 0.00 | 0.00 |
| ATOM | 18242 | CD1  | LEU | 1219 | 66.542 | 42.785 | 48.342 | 0.00 | 0.00 |
| ATOM | 18243 | 1HD1 | LEU | 1219 | 66.447 | 41.708 | 48.203 | 0.00 | 0.00 |
| ATOM | 18244 | 2HD1 | LEU | 1219 | 66.208 | 43.113 | 49.326 | 0.00 | 0.00 |
| ATOM | 18245 | 3HD1 | LEU | 1219 | 65.865 | 43.115 | 47.553 | 0.00 | 0.00 |
| ATOM | 18246 | CD2  | LEU | 1219 | 68.292 | 42.287 | 46.546 | 0.00 | 0.00 |
| ATOM | 18247 | 1HD2 | LEU | 1219 | 69.352 | 42.396 | 46.320 | 0.00 | 0.00 |
| ATOM | 18248 | 2HD2 | LEU | 1219 | 68.007 | 41.246 | 46.702 | 0.00 | 0.00 |

|      |       |      |     |      |        |        |        |      |      |
|------|-------|------|-----|------|--------|--------|--------|------|------|
| ATOM | 18249 | 3HD2 | LEU | 1219 | 67.644 | 42.774 | 45.816 | 0.00 | 0.00 |
| ATOM | 18250 | C    | LEU | 1219 | 68.937 | 45.097 | 50.045 | 0.00 | 0.00 |
| ATOM | 18251 | O    | LEU | 1219 | 70.169 | 44.806 | 49.858 | 0.00 | 0.00 |
| ATOM | 18252 | N    | H11 | 1220 | 68.251 | 44.792 | 51.200 | 0.00 | 0.00 |
| ATOM | 18253 | H    | H11 | 1220 | 67.253 | 44.903 | 51.092 | 0.00 | 0.00 |
| ATOM | 18254 | CA   | H11 | 1220 | 68.591 | 43.688 | 52.111 | 0.00 | 0.00 |
| ATOM | 18255 | HA   | H11 | 1220 | 69.654 | 43.447 | 52.114 | 0.00 | 0.00 |
| ATOM | 18256 | CB   | H11 | 1220 | 68.333 | 44.093 | 53.609 | 0.00 | 0.00 |
| ATOM | 18257 | HB2  | H11 | 1220 | 68.903 | 45.008 | 53.766 | 0.00 | 0.00 |
| ATOM | 18258 | HB3  | H11 | 1220 | 67.318 | 44.483 | 53.673 | 0.00 | 0.00 |
| ATOM | 18259 | CG   | H11 | 1220 | 68.506 | 43.113 | 54.754 | 0.00 | 0.00 |
| ATOM | 18260 | ND1  | H11 | 1220 | 69.137 | 43.470 | 55.944 | 0.00 | 0.00 |
| ATOM | 18261 | CE1  | H11 | 1220 | 68.960 | 42.510 | 56.817 | 0.00 | 0.00 |
| ATOM | 18262 | HE1  | H11 | 1220 | 69.266 | 42.668 | 57.841 | 0.00 | 0.00 |
| ATOM | 18263 | NE2  | H11 | 1220 | 68.232 | 41.502 | 56.184 | 0.00 | 0.00 |
| ATOM | 18264 | HE2  | H11 | 1220 | 67.897 | 40.679 | 56.664 | 0.00 | 0.00 |
| ATOM | 18265 | CD2  | H11 | 1220 | 67.821 | 41.986 | 54.977 | 0.00 | 0.00 |
| ATOM | 18266 | HD2  | H11 | 1220 | 67.090 | 41.589 | 54.288 | 0.00 | 0.00 |
| ATOM | 18267 | C    | H11 | 1220 | 67.725 | 42.415 | 51.788 | 0.00 | 0.00 |
| ATOM | 18268 | O    | H11 | 1220 | 66.562 | 42.329 | 52.043 | 0.00 | 0.00 |
| ATOM | 18269 | N    | SER | 1221 | 68.298 | 41.399 | 51.150 | 0.00 | 0.00 |
| ATOM | 18270 | H    | SER | 1221 | 69.264 | 41.631 | 50.963 | 0.00 | 0.00 |
| ATOM | 18271 | CA   | SER | 1221 | 67.834 | 40.041 | 50.772 | 0.00 | 0.00 |
| ATOM | 18272 | HA   | SER | 1221 | 67.090 | 40.296 | 50.017 | 0.00 | 0.00 |
| ATOM | 18273 | CB   | SER | 1221 | 69.005 | 39.345 | 50.012 | 0.00 | 0.00 |
| ATOM | 18274 | HB2  | SER | 1221 | 69.307 | 39.949 | 49.156 | 0.00 | 0.00 |

|      |       |      |     |      |        |        |        |      |      |
|------|-------|------|-----|------|--------|--------|--------|------|------|
| ATOM | 18275 | HB3  | SER | 1221 | 69.951 | 39.254 | 50.546 | 0.00 | 0.00 |
| ATOM | 18276 | OG   | SER | 1221 | 68.660 | 37.990 | 49.689 | 0.00 | 0.00 |
| ATOM | 18277 | HG   | SER | 1221 | 67.850 | 38.026 | 49.175 | 0.00 | 0.00 |
| ATOM | 18278 | C    | SER | 1221 | 67.275 | 39.208 | 51.925 | 0.00 | 0.00 |
| ATOM | 18279 | O    | SER | 1221 | 67.895 | 39.260 | 53.008 | 0.00 | 0.00 |
| ATOM | 18280 | N    | ASP | 1222 | 66.172 | 38.453 | 51.762 | 0.00 | 0.00 |
| ATOM | 18281 | H    | ASP | 1222 | 65.784 | 38.340 | 50.836 | 0.00 | 0.00 |
| ATOM | 18282 | CA   | ASP | 1222 | 65.709 | 37.512 | 52.801 | 0.00 | 0.00 |
| ATOM | 18283 | HA   | ASP | 1222 | 65.651 | 38.148 | 53.684 | 0.00 | 0.00 |
| ATOM | 18284 | CB   | ASP | 1222 | 64.264 | 36.986 | 52.594 | 0.00 | 0.00 |
| ATOM | 18285 | HB2  | ASP | 1222 | 63.887 | 36.644 | 53.558 | 0.00 | 0.00 |
| ATOM | 18286 | HB3  | ASP | 1222 | 63.711 | 37.825 | 52.174 | 0.00 | 0.00 |
| ATOM | 18287 | CG   | ASP | 1222 | 64.176 | 35.858 | 51.543 | 0.00 | 0.00 |
| ATOM | 18288 | OD1  | ASP | 1222 | 64.089 | 34.671 | 51.930 | 0.00 | 0.00 |
| ATOM | 18289 | OD2  | ASP | 1222 | 64.226 | 36.216 | 50.315 | 0.00 | 0.00 |
| ATOM | 18290 | C    | ASP | 1222 | 66.737 | 36.411 | 53.121 | 0.00 | 0.00 |
| ATOM | 18291 | O    | ASP | 1222 | 67.447 | 35.922 | 52.261 | 0.00 | 0.00 |
| ATOM | 18292 | N    | THR | 1223 | 66.664 | 36.106 | 54.409 | 0.00 | 0.00 |
| ATOM | 18293 | H    | THR | 1223 | 66.022 | 36.612 | 55.002 | 0.00 | 0.00 |
| ATOM | 18294 | CA   | THR | 1223 | 67.349 | 34.950 | 55.036 | 0.00 | 0.00 |
| ATOM | 18295 | HA   | THR | 1223 | 67.960 | 34.562 | 54.221 | 0.00 | 0.00 |
| ATOM | 18296 | CB   | THR | 1223 | 68.191 | 35.343 | 56.272 | 0.00 | 0.00 |
| ATOM | 18297 | HB   | THR | 1223 | 68.731 | 34.506 | 56.716 | 0.00 | 0.00 |
| ATOM | 18298 | CG2  | THR | 1223 | 69.252 | 36.501 | 56.186 | 0.00 | 0.00 |
| ATOM | 18299 | 1HG2 | THR | 1223 | 68.751 | 37.348 | 55.717 | 0.00 | 0.00 |
| ATOM | 18300 | 2HG2 | THR | 1223 | 69.497 | 36.804 | 57.204 | 0.00 | 0.00 |

|      |       |      |     |      |        |        |        |      |      |
|------|-------|------|-----|------|--------|--------|--------|------|------|
| ATOM | 18301 | 3HG2 | THR | 1223 | 70.141 | 36.177 | 55.644 | 0.00 | 0.00 |
| ATOM | 18302 | OG1  | THR | 1223 | 67.223 | 35.772 | 57.177 | 0.00 | 0.00 |
| ATOM | 18303 | HG1  | THR | 1223 | 66.927 | 36.645 | 56.909 | 0.00 | 0.00 |
| ATOM | 18304 | C    | THR | 1223 | 66.353 | 33.856 | 55.380 | 0.00 | 0.00 |
| ATOM | 18305 | O    | THR | 1223 | 66.796 | 32.892 | 55.977 | 0.00 | 0.00 |
| ATOM | 18306 | N    | LEU | 1224 | 65.176 | 33.974 | 54.978 | 0.00 | 0.00 |
| ATOM | 18307 | H    | LEU | 1224 | 64.893 | 34.682 | 54.315 | 0.00 | 0.00 |
| ATOM | 18308 | CA   | LEU | 1224 | 64.081 | 33.058 | 55.426 | 0.00 | 0.00 |
| ATOM | 18309 | HA   | LEU | 1224 | 64.369 | 32.580 | 56.362 | 0.00 | 0.00 |
| ATOM | 18310 | CB   | LEU | 1224 | 62.893 | 33.972 | 55.704 | 0.00 | 0.00 |
| ATOM | 18311 | HB2  | LEU | 1224 | 62.711 | 34.585 | 54.821 | 0.00 | 0.00 |
| ATOM | 18312 | HB3  | LEU | 1224 | 62.124 | 33.221 | 55.884 | 0.00 | 0.00 |
| ATOM | 18313 | CG   | LEU | 1224 | 63.181 | 34.948 | 56.847 | 0.00 | 0.00 |
| ATOM | 18314 | HG   | LEU | 1224 | 63.918 | 35.682 | 56.523 | 0.00 | 0.00 |
| ATOM | 18315 | CD1  | LEU | 1224 | 61.931 | 35.743 | 57.120 | 0.00 | 0.00 |
| ATOM | 18316 | 1HD1 | LEU | 1224 | 61.244 | 34.949 | 57.413 | 0.00 | 0.00 |
| ATOM | 18317 | 2HD1 | LEU | 1224 | 62.205 | 36.356 | 57.978 | 0.00 | 0.00 |
| ATOM | 18318 | 3HD1 | LEU | 1224 | 61.709 | 36.521 | 56.389 | 0.00 | 0.00 |
| ATOM | 18319 | CD2  | LEU | 1224 | 63.716 | 34.202 | 58.047 | 0.00 | 0.00 |
| ATOM | 18320 | 1HD2 | LEU | 1224 | 63.763 | 34.802 | 58.956 | 0.00 | 0.00 |
| ATOM | 18321 | 2HD2 | LEU | 1224 | 63.083 | 33.333 | 58.224 | 0.00 | 0.00 |
| ATOM | 18322 | 3HD2 | LEU | 1224 | 64.791 | 34.041 | 57.971 | 0.00 | 0.00 |
| ATOM | 18323 | C    | LEU | 1224 | 63.777 | 32.034 | 54.427 | 0.00 | 0.00 |
| ATOM | 18324 | O    | LEU | 1224 | 63.240 | 30.995 | 54.823 | 0.00 | 0.00 |
| ATOM | 18325 | N    | ASN | 1225 | 64.122 | 32.198 | 53.164 | 0.00 | 0.00 |
| ATOM | 18326 | H    | ASN | 1225 | 64.470 | 33.128 | 52.977 | 0.00 | 0.00 |

|      |       |      |     |      |        |        |        |      |      |
|------|-------|------|-----|------|--------|--------|--------|------|------|
| ATOM | 18327 | CA   | ASN | 1225 | 63.733 | 31.351 | 52.104 | 0.00 | 0.00 |
| ATOM | 18328 | HA   | ASN | 1225 | 63.899 | 31.986 | 51.234 | 0.00 | 0.00 |
| ATOM | 18329 | CB   | ASN | 1225 | 64.632 | 30.091 | 52.049 | 0.00 | 0.00 |
| ATOM | 18330 | HB2  | ASN | 1225 | 64.468 | 29.301 | 52.782 | 0.00 | 0.00 |
| ATOM | 18331 | HB3  | ASN | 1225 | 64.569 | 29.631 | 51.063 | 0.00 | 0.00 |
| ATOM | 18332 | CG   | ASN | 1225 | 66.065 | 30.425 | 52.253 | 0.00 | 0.00 |
| ATOM | 18333 | OD1  | ASN | 1225 | 66.617 | 31.237 | 51.636 | 0.00 | 0.00 |
| ATOM | 18334 | ND2  | ASN | 1225 | 66.778 | 29.564 | 53.016 | 0.00 | 0.00 |
| ATOM | 18335 | 1HD2 | ASN | 1225 | 67.726 | 29.771 | 53.297 | 0.00 | 0.00 |
| ATOM | 18336 | 2HD2 | ASN | 1225 | 66.174 | 28.891 | 53.467 | 0.00 | 0.00 |
| ATOM | 18337 | C    | ASN | 1225 | 62.256 | 30.985 | 52.018 | 0.00 | 0.00 |
| ATOM | 18338 | O    | ASN | 1225 | 61.845 | 30.021 | 51.377 | 0.00 | 0.00 |
| ATOM | 18339 | N    | GLU | 1226 | 61.458 | 31.892 | 52.535 | 0.00 | 0.00 |
| ATOM | 18340 | H    | GLU | 1226 | 61.961 | 32.615 | 53.030 | 0.00 | 0.00 |
| ATOM | 18341 | CA   | GLU | 1226 | 60.018 | 31.809 | 52.700 | 0.00 | 0.00 |
| ATOM | 18342 | HA   | GLU | 1226 | 59.664 | 30.946 | 53.263 | 0.00 | 0.00 |
| ATOM | 18343 | CB   | GLU | 1226 | 59.553 | 32.987 | 53.495 | 0.00 | 0.00 |
| ATOM | 18344 | HB2  | GLU | 1226 | 58.568 | 32.660 | 53.826 | 0.00 | 0.00 |
| ATOM | 18345 | HB3  | GLU | 1226 | 60.098 | 33.006 | 54.439 | 0.00 | 0.00 |
| ATOM | 18346 | CG   | GLU | 1226 | 59.558 | 34.415 | 52.887 | 0.00 | 0.00 |
| ATOM | 18347 | HG2  | GLU | 1226 | 60.561 | 34.644 | 52.529 | 0.00 | 0.00 |
| ATOM | 18348 | HG3  | GLU | 1226 | 58.788 | 34.490 | 52.119 | 0.00 | 0.00 |
| ATOM | 18349 | CD   | GLU | 1226 | 59.235 | 35.494 | 53.900 | 0.00 | 0.00 |
| ATOM | 18350 | OE1  | GLU | 1226 | 59.963 | 36.509 | 53.930 | 0.00 | 0.00 |
| ATOM | 18351 | OE2  | GLU | 1226 | 58.256 | 35.350 | 54.645 | 0.00 | 0.00 |
| ATOM | 18352 | C    | GLU | 1226 | 59.175 | 31.797 | 51.398 | 0.00 | 0.00 |

|      |       |     |     |      |        |        |        |      |      |
|------|-------|-----|-----|------|--------|--------|--------|------|------|
| ATOM | 18353 | O   | GLU | 1226 | 58.184 | 31.097 | 51.345 | 0.00 | 0.00 |
| ATOM | 18354 | N   | SER | 1227 | 59.681 | 32.352 | 50.344 | 0.00 | 0.00 |
| ATOM | 18355 | H   | SER | 1227 | 60.483 | 32.963 | 50.385 | 0.00 | 0.00 |
| ATOM | 18356 | CA  | SER | 1227 | 59.030 | 32.620 | 49.097 | 0.00 | 0.00 |
| ATOM | 18357 | HA  | SER | 1227 | 58.082 | 32.084 | 49.060 | 0.00 | 0.00 |
| ATOM | 18358 | CB  | SER | 1227 | 58.649 | 34.069 | 49.056 | 0.00 | 0.00 |
| ATOM | 18359 | HB2 | SER | 1227 | 59.455 | 34.607 | 49.556 | 0.00 | 0.00 |
| ATOM | 18360 | HB3 | SER | 1227 | 58.437 | 34.526 | 48.090 | 0.00 | 0.00 |
| ATOM | 18361 | OG  | SER | 1227 | 57.498 | 34.236 | 49.848 | 0.00 | 0.00 |
| ATOM | 18362 | HG  | SER | 1227 | 57.489 | 35.102 | 50.261 | 0.00 | 0.00 |
| ATOM | 18363 | C   | SER | 1227 | 59.898 | 32.203 | 47.893 | 0.00 | 0.00 |
| ATOM | 18364 | O   | SER | 1227 | 59.296 | 32.069 | 46.841 | 0.00 | 0.00 |
| ATOM | 18365 | N   | GLY | 1228 | 61.191 | 31.892 | 48.149 | 0.00 | 0.00 |
| ATOM | 18366 | H   | GLY | 1228 | 61.580 | 32.061 | 49.065 | 0.00 | 0.00 |
| ATOM | 18367 | CA  | GLY | 1228 | 62.114 | 31.229 | 47.223 | 0.00 | 0.00 |
| ATOM | 18368 | HA2 | GLY | 1228 | 61.775 | 30.193 | 47.194 | 0.00 | 0.00 |
| ATOM | 18369 | HA3 | GLY | 1228 | 62.045 | 31.745 | 46.265 | 0.00 | 0.00 |
| ATOM | 18370 | C   | GLY | 1228 | 63.579 | 31.337 | 47.614 | 0.00 | 0.00 |
| ATOM | 18371 | O   | GLY | 1228 | 63.975 | 31.532 | 48.782 | 0.00 | 0.00 |
| ATOM | 18372 | N   | PHE | 1229 | 64.429 | 31.282 | 46.542 | 0.00 | 0.00 |
| ATOM | 18373 | H   | PHE | 1229 | 64.011 | 30.826 | 45.743 | 0.00 | 0.00 |
| ATOM | 18374 | CA  | PHE | 1229 | 65.925 | 31.385 | 46.624 | 0.00 | 0.00 |
| ATOM | 18375 | HA  | PHE | 1229 | 66.278 | 31.507 | 47.648 | 0.00 | 0.00 |
| ATOM | 18376 | CB  | PHE | 1229 | 66.591 | 29.992 | 46.254 | 0.00 | 0.00 |
| ATOM | 18377 | HB2 | PHE | 1229 | 66.414 | 29.745 | 45.208 | 0.00 | 0.00 |
| ATOM | 18378 | HB3 | PHE | 1229 | 67.665 | 30.118 | 46.392 | 0.00 | 0.00 |

|            |      |          |        |        |        |      |      |
|------------|------|----------|--------|--------|--------|------|------|
| ATOM 18379 | CG   | PHE 1229 | 66.188 | 28.793 | 47.070 | 0.00 | 0.00 |
| ATOM 18380 | CD1  | PHE 1229 | 66.274 | 28.849 | 48.491 | 0.00 | 0.00 |
| ATOM 18381 | HD1  | PHE 1229 | 66.672 | 29.700 | 49.024 | 0.00 | 0.00 |
| ATOM 18382 | CE1  | PHE 1229 | 65.709 | 27.815 | 49.216 | 0.00 | 0.00 |
| ATOM 18383 | HE1  | PHE 1229 | 65.595 | 27.925 | 50.284 | 0.00 | 0.00 |
| ATOM 18384 | CZ   | PHE 1229 | 65.049 | 26.748 | 48.623 | 0.00 | 0.00 |
| ATOM 18385 | HZ   | PHE 1229 | 64.671 | 25.951 | 49.246 | 0.00 | 0.00 |
| ATOM 18386 | CE2  | PHE 1229 | 64.971 | 26.656 | 47.200 | 0.00 | 0.00 |
| ATOM 18387 | HE2  | PHE 1229 | 64.458 | 25.819 | 46.750 | 0.00 | 0.00 |
| ATOM 18388 | CD2  | PHE 1229 | 65.598 | 27.695 | 46.392 | 0.00 | 0.00 |
| ATOM 18389 | HD2  | PHE 1229 | 65.558 | 27.651 | 45.314 | 0.00 | 0.00 |
| ATOM 18390 | C    | PHE 1229 | 66.502 | 32.647 | 45.916 | 0.00 | 0.00 |
| ATOM 18391 | O    | PHE 1229 | 65.712 | 33.515 | 45.521 | 0.00 | 0.00 |
| ATOM 18392 | N    | VAL 1230 | 67.802 | 32.792 | 45.727 | 0.00 | 0.00 |
| ATOM 18393 | H    | VAL 1230 | 68.369 | 31.981 | 45.924 | 0.00 | 0.00 |
| ATOM 18394 | CA   | VAL 1230 | 68.306 | 34.098 | 45.220 | 0.00 | 0.00 |
| ATOM 18395 | HA   | VAL 1230 | 67.844 | 34.897 | 45.799 | 0.00 | 0.00 |
| ATOM 18396 | CB   | VAL 1230 | 69.845 | 34.269 | 45.494 | 0.00 | 0.00 |
| ATOM 18397 | HB   | VAL 1230 | 70.002 | 33.792 | 46.461 | 0.00 | 0.00 |
| ATOM 18398 | CG1  | VAL 1230 | 70.754 | 33.542 | 44.498 | 0.00 | 0.00 |
| ATOM 18399 | 1HG1 | VAL 1230 | 70.394 | 32.516 | 44.429 | 0.00 | 0.00 |
| ATOM 18400 | 2HG1 | VAL 1230 | 70.649 | 34.029 | 43.528 | 0.00 | 0.00 |
| ATOM 18401 | 3HG1 | VAL 1230 | 71.809 | 33.585 | 44.769 | 0.00 | 0.00 |
| ATOM 18402 | CG2  | VAL 1230 | 70.316 | 35.678 | 45.622 | 0.00 | 0.00 |
| ATOM 18403 | 1HG2 | VAL 1230 | 70.254 | 36.096 | 44.617 | 0.00 | 0.00 |
| ATOM 18404 | 2HG2 | VAL 1230 | 69.552 | 36.152 | 46.238 | 0.00 | 0.00 |

|            |      |     |      |        |        |        |      |      |
|------------|------|-----|------|--------|--------|--------|------|------|
| ATOM 18405 | 3HG2 | VAL | 1230 | 71.334 | 35.827 | 45.980 | 0.00 | 0.00 |
| ATOM 18406 | C    | VAL | 1230 | 67.966 | 34.265 | 43.738 | 0.00 | 0.00 |
| ATOM 18407 | O    | VAL | 1230 | 67.944 | 35.336 | 43.240 | 0.00 | 0.00 |
| ATOM 18408 | N    | GLU | 1231 | 67.809 | 33.136 | 43.012 | 0.00 | 0.00 |
| ATOM 18409 | H    | GLU | 1231 | 68.067 | 32.256 | 43.436 | 0.00 | 0.00 |
| ATOM 18410 | CA   | GLU | 1231 | 67.323 | 33.112 | 41.670 | 0.00 | 0.00 |
| ATOM 18411 | HA   | GLU | 1231 | 68.034 | 33.698 | 41.087 | 0.00 | 0.00 |
| ATOM 18412 | CB   | GLU | 1231 | 67.355 | 31.594 | 41.193 | 0.00 | 0.00 |
| ATOM 18413 | HB2  | GLU | 1231 | 67.052 | 31.515 | 40.149 | 0.00 | 0.00 |
| ATOM 18414 | HB3  | GLU | 1231 | 68.316 | 31.086 | 41.271 | 0.00 | 0.00 |
| ATOM 18415 | CG   | GLU | 1231 | 66.264 | 30.764 | 41.855 | 0.00 | 0.00 |
| ATOM 18416 | HG2  | GLU | 1231 | 66.047 | 30.842 | 42.921 | 0.00 | 0.00 |
| ATOM 18417 | HG3  | GLU | 1231 | 65.397 | 31.130 | 41.305 | 0.00 | 0.00 |
| ATOM 18418 | CD   | GLU | 1231 | 66.465 | 29.285 | 41.470 | 0.00 | 0.00 |
| ATOM 18419 | OE1  | GLU | 1231 | 67.528 | 28.730 | 41.839 | 0.00 | 0.00 |
| ATOM 18420 | OE2  | GLU | 1231 | 65.411 | 28.708 | 40.948 | 0.00 | 0.00 |
| ATOM 18421 | C    | GLU | 1231 | 65.927 | 33.656 | 41.375 | 0.00 | 0.00 |
| ATOM 18422 | O    | GLU | 1231 | 65.632 | 34.181 | 40.310 | 0.00 | 0.00 |
| ATOM 18423 | N    | ASP | 1232 | 65.094 | 33.427 | 42.436 | 0.00 | 0.00 |
| ATOM 18424 | H    | ASP | 1232 | 65.483 | 32.896 | 43.201 | 0.00 | 0.00 |
| ATOM 18425 | CA   | ASP | 1232 | 63.790 | 33.969 | 42.624 | 0.00 | 0.00 |
| ATOM 18426 | HA   | ASP | 1232 | 63.222 | 33.704 | 41.732 | 0.00 | 0.00 |
| ATOM 18427 | CB   | ASP | 1232 | 63.039 | 33.492 | 43.874 | 0.00 | 0.00 |
| ATOM 18428 | HB2  | ASP | 1232 | 63.286 | 32.430 | 43.899 | 0.00 | 0.00 |
| ATOM 18429 | HB3  | ASP | 1232 | 63.421 | 34.017 | 44.750 | 0.00 | 0.00 |
| ATOM 18430 | CG   | ASP | 1232 | 61.521 | 33.630 | 43.774 | 0.00 | 0.00 |



|      |       |      |     |      |        |        |        |      |      |
|------|-------|------|-----|------|--------|--------|--------|------|------|
| ATOM | 18431 | OD1  | ASP | 1232 | 61.016 | 33.922 | 42.705 | 0.00 | 0.00 |
| ATOM | 18432 | OD2  | ASP | 1232 | 60.804 | 33.522 | 44.801 | 0.00 | 0.00 |
| ATOM | 18433 | C    | ASP | 1232 | 63.893 | 35.497 | 42.613 | 0.00 | 0.00 |
| ATOM | 18434 | O    | ASP | 1232 | 63.492 | 36.058 | 41.606 | 0.00 | 0.00 |
| ATOM | 18435 | N    | THR | 1233 | 64.707 | 36.090 | 43.501 | 0.00 | 0.00 |
| ATOM | 18436 | H    | THR | 1233 | 64.991 | 35.500 | 44.270 | 0.00 | 0.00 |
| ATOM | 18437 | CA   | THR | 1233 | 65.112 | 37.510 | 43.589 | 0.00 | 0.00 |
| ATOM | 18438 | HA   | THR | 1233 | 64.180 | 38.041 | 43.780 | 0.00 | 0.00 |
| ATOM | 18439 | CB   | THR | 1233 | 66.118 | 37.764 | 44.727 | 0.00 | 0.00 |
| ATOM | 18440 | HB   | THR | 1233 | 67.074 | 37.278 | 44.539 | 0.00 | 0.00 |
| ATOM | 18441 | CG2  | THR | 1233 | 66.324 | 39.219 | 45.071 | 0.00 | 0.00 |
| ATOM | 18442 | 1HG2 | THR | 1233 | 66.503 | 39.835 | 44.189 | 0.00 | 0.00 |
| ATOM | 18443 | 2HG2 | THR | 1233 | 65.515 | 39.605 | 45.691 | 0.00 | 0.00 |
| ATOM | 18444 | 3HG2 | THR | 1233 | 67.194 | 39.170 | 45.726 | 0.00 | 0.00 |
| ATOM | 18445 | OG1  | THR | 1233 | 65.616 | 37.206 | 45.896 | 0.00 | 0.00 |
| ATOM | 18446 | HG1  | THR | 1233 | 64.666 | 37.213 | 45.753 | 0.00 | 0.00 |
| ATOM | 18447 | C    | THR | 1233 | 65.768 | 38.109 | 42.283 | 0.00 | 0.00 |
| ATOM | 18448 | O    | THR | 1233 | 65.379 | 39.194 | 41.895 | 0.00 | 0.00 |
| ATOM | 18449 | N    | LEU | 1234 | 66.637 | 37.335 | 41.656 | 0.00 | 0.00 |
| ATOM | 18450 | H    | LEU | 1234 | 67.026 | 36.501 | 42.072 | 0.00 | 0.00 |
| ATOM | 18451 | CA   | LEU | 1234 | 67.216 | 37.695 | 40.389 | 0.00 | 0.00 |
| ATOM | 18452 | HA   | LEU | 1234 | 67.498 | 38.744 | 40.477 | 0.00 | 0.00 |
| ATOM | 18453 | CB   | LEU | 1234 | 68.441 | 36.777 | 40.098 | 0.00 | 0.00 |
| ATOM | 18454 | HB2  | LEU | 1234 | 68.084 | 35.749 | 40.148 | 0.00 | 0.00 |
| ATOM | 18455 | HB3  | LEU | 1234 | 68.742 | 36.953 | 39.066 | 0.00 | 0.00 |
| ATOM | 18456 | CG   | LEU | 1234 | 69.597 | 37.043 | 41.096 | 0.00 | 0.00 |

|            |               |        |        |        |      |      |
|------------|---------------|--------|--------|--------|------|------|
| ATOM 18457 | HG LEU 1234   | 69.280 | 37.345 | 42.095 | 0.00 | 0.00 |
| ATOM 18458 | CD1 LEU 1234  | 70.451 | 35.769 | 41.128 | 0.00 | 0.00 |
| ATOM 18459 | 1HD1 LEU 1234 | 71.411 | 35.975 | 41.601 | 0.00 | 0.00 |
| ATOM 18460 | 2HD1 LEU 1234 | 69.879 | 34.996 | 41.642 | 0.00 | 0.00 |
| ATOM 18461 | 3HD1 LEU 1234 | 70.735 | 35.392 | 40.146 | 0.00 | 0.00 |
| ATOM 18462 | CD2 LEU 1234  | 70.428 | 38.240 | 40.583 | 0.00 | 0.00 |
| ATOM 18463 | 1HD2 LEU 1234 | 71.073 | 38.519 | 41.417 | 0.00 | 0.00 |
| ATOM 18464 | 2HD2 LEU 1234 | 71.049 | 37.828 | 39.787 | 0.00 | 0.00 |
| ATOM 18465 | 3HD2 LEU 1234 | 69.718 | 39.027 | 40.327 | 0.00 | 0.00 |
| ATOM 18466 | C LEU 1234    | 66.240 | 37.702 | 39.111 | 0.00 | 0.00 |
| ATOM 18467 | O LEU 1234    | 66.445 | 38.557 | 38.235 | 0.00 | 0.00 |
| ATOM 18468 | N ALA 1235    | 65.224 | 36.792 | 39.071 | 0.00 | 0.00 |
| ATOM 18469 | H ALA 1235    | 65.325 | 35.991 | 39.678 | 0.00 | 0.00 |
| ATOM 18470 | CA ALA 1235   | 64.079 | 36.895 | 38.214 | 0.00 | 0.00 |
| ATOM 18471 | HA ALA 1235   | 64.399 | 37.093 | 37.191 | 0.00 | 0.00 |
| ATOM 18472 | CB ALA 1235   | 63.319 | 35.524 | 38.213 | 0.00 | 0.00 |
| ATOM 18473 | HB1 ALA 1235  | 62.428 | 35.449 | 37.590 | 0.00 | 0.00 |
| ATOM 18474 | HB2 ALA 1235  | 63.914 | 34.706 | 37.808 | 0.00 | 0.00 |
| ATOM 18475 | HB3 ALA 1235  | 63.010 | 35.167 | 39.196 | 0.00 | 0.00 |
| ATOM 18476 | C ALA 1235    | 63.184 | 38.068 | 38.585 | 0.00 | 0.00 |
| ATOM 18477 | O ALA 1235    | 62.662 | 38.655 | 37.638 | 0.00 | 0.00 |
| ATOM 18478 | N ALA 1236    | 62.944 | 38.458 | 39.875 | 0.00 | 0.00 |
| ATOM 18479 | H ALA 1236    | 63.137 | 37.790 | 40.608 | 0.00 | 0.00 |
| ATOM 18480 | CA ALA 1236   | 62.082 | 39.533 | 40.223 | 0.00 | 0.00 |
| ATOM 18481 | HA ALA 1236   | 61.155 | 39.387 | 39.669 | 0.00 | 0.00 |
| ATOM 18482 | CB ALA 1236   | 61.653 | 39.409 | 41.666 | 0.00 | 0.00 |

|      |       |      |     |      |        |        |        |      |      |
|------|-------|------|-----|------|--------|--------|--------|------|------|
| ATOM | 18483 | HB1  | ALA | 1236 | 60.962 | 40.160 | 42.048 | 0.00 | 0.00 |
| ATOM | 18484 | HB2  | ALA | 1236 | 61.301 | 38.418 | 41.952 | 0.00 | 0.00 |
| ATOM | 18485 | HB3  | ALA | 1236 | 62.582 | 39.467 | 42.234 | 0.00 | 0.00 |
| ATOM | 18486 | C    | ALA | 1236 | 62.777 | 40.890 | 39.872 | 0.00 | 0.00 |
| ATOM | 18487 | O    | ALA | 1236 | 62.095 | 41.856 | 39.517 | 0.00 | 0.00 |
| ATOM | 18488 | N    | ILE | 1237 | 64.123 | 41.024 | 40.102 | 0.00 | 0.00 |
| ATOM | 18489 | H    | ILE | 1237 | 64.576 | 40.190 | 40.448 | 0.00 | 0.00 |
| ATOM | 18490 | CA   | ILE | 1237 | 65.040 | 42.144 | 39.761 | 0.00 | 0.00 |
| ATOM | 18491 | HA   | ILE | 1237 | 64.576 | 43.069 | 40.103 | 0.00 | 0.00 |
| ATOM | 18492 | CB   | ILE | 1237 | 66.484 | 41.948 | 40.234 | 0.00 | 0.00 |
| ATOM | 18493 | HB   | ILE | 1237 | 66.890 | 40.984 | 39.928 | 0.00 | 0.00 |
| ATOM | 18494 | CG2  | ILE | 1237 | 67.429 | 43.052 | 39.610 | 0.00 | 0.00 |
| ATOM | 18495 | 1HG2 | ILE | 1237 | 67.598 | 42.955 | 38.538 | 0.00 | 0.00 |
| ATOM | 18496 | 2HG2 | ILE | 1237 | 66.897 | 43.987 | 39.791 | 0.00 | 0.00 |
| ATOM | 18497 | 3HG2 | ILE | 1237 | 68.397 | 43.233 | 40.078 | 0.00 | 0.00 |
| ATOM | 18498 | CG1  | ILE | 1237 | 66.551 | 42.123 | 41.822 | 0.00 | 0.00 |
| ATOM | 18499 | 2HG1 | ILE | 1237 | 66.165 | 43.124 | 42.014 | 0.00 | 0.00 |
| ATOM | 18500 | 3HG1 | ILE | 1237 | 65.870 | 41.543 | 42.443 | 0.00 | 0.00 |
| ATOM | 18501 | CD1  | ILE | 1237 | 67.941 | 41.829 | 42.421 | 0.00 | 0.00 |
| ATOM | 18502 | 1HD1 | ILE | 1237 | 67.953 | 41.687 | 43.501 | 0.00 | 0.00 |
| ATOM | 18503 | 2HD1 | ILE | 1237 | 68.327 | 40.876 | 42.059 | 0.00 | 0.00 |
| ATOM | 18504 | 3HD1 | ILE | 1237 | 68.763 | 42.497 | 42.165 | 0.00 | 0.00 |
| ATOM | 18505 | C    | ILE | 1237 | 65.171 | 42.299 | 38.241 | 0.00 | 0.00 |
| ATOM | 18506 | O    | ILE | 1237 | 64.926 | 43.370 | 37.694 | 0.00 | 0.00 |
| ATOM | 18507 | N    | GLY | 1238 | 65.135 | 41.161 | 37.523 | 0.00 | 0.00 |
| ATOM | 18508 | H    | GLY | 1238 | 65.182 | 40.237 | 37.929 | 0.00 | 0.00 |

|      |       |     |     |      |        |        |        |      |      |
|------|-------|-----|-----|------|--------|--------|--------|------|------|
| ATOM | 18509 | CA  | GLY | 1238 | 64.833 | 41.176 | 36.132 | 0.00 | 0.00 |
| ATOM | 18510 | HA2 | GLY | 1238 | 64.850 | 40.142 | 35.787 | 0.00 | 0.00 |
| ATOM | 18511 | HA3 | GLY | 1238 | 63.830 | 41.582 | 35.998 | 0.00 | 0.00 |
| ATOM | 18512 | C   | GLY | 1238 | 65.789 | 42.004 | 35.290 | 0.00 | 0.00 |
| ATOM | 18513 | O   | GLY | 1238 | 65.342 | 42.824 | 34.516 | 0.00 | 0.00 |
| ATOM | 18514 | N   | GLY | 1239 | 67.080 | 41.905 | 35.491 | 0.00 | 0.00 |
| ATOM | 18515 | H   | GLY | 1239 | 67.366 | 41.141 | 36.088 | 0.00 | 0.00 |
| ATOM | 18516 | CA  | GLY | 1239 | 68.133 | 42.635 | 34.763 | 0.00 | 0.00 |
| ATOM | 18517 | HA2 | GLY | 1239 | 69.096 | 42.191 | 35.014 | 0.00 | 0.00 |
| ATOM | 18518 | HA3 | GLY | 1239 | 68.113 | 42.485 | 33.683 | 0.00 | 0.00 |
| ATOM | 18519 | C   | GLY | 1239 | 68.252 | 44.123 | 34.970 | 0.00 | 0.00 |
| ATOM | 18520 | O   | GLY | 1239 | 69.060 | 44.809 | 34.291 | 0.00 | 0.00 |
| ATOM | 18521 | N   | ARG | 1240 | 67.567 | 44.702 | 35.902 | 0.00 | 0.00 |
| ATOM | 18522 | H   | ARG | 1240 | 67.166 | 44.043 | 36.554 | 0.00 | 0.00 |
| ATOM | 18523 | CA  | ARG | 1240 | 67.404 | 46.203 | 36.032 | 0.00 | 0.00 |
| ATOM | 18524 | HA  | ARG | 1240 | 67.844 | 46.681 | 35.157 | 0.00 | 0.00 |
| ATOM | 18525 | CB  | ARG | 1240 | 65.900 | 46.603 | 36.139 | 0.00 | 0.00 |
| ATOM | 18526 | HB2 | ARG | 1240 | 65.517 | 46.213 | 37.082 | 0.00 | 0.00 |
| ATOM | 18527 | HB3 | ARG | 1240 | 65.802 | 47.686 | 36.217 | 0.00 | 0.00 |
| ATOM | 18528 | CG  | ARG | 1240 | 65.001 | 46.277 | 34.869 | 0.00 | 0.00 |
| ATOM | 18529 | HG2 | ARG | 1240 | 65.143 | 47.144 | 34.224 | 0.00 | 0.00 |
| ATOM | 18530 | HG3 | ARG | 1240 | 65.344 | 45.474 | 34.218 | 0.00 | 0.00 |
| ATOM | 18531 | CD  | ARG | 1240 | 63.517 | 46.195 | 35.261 | 0.00 | 0.00 |
| ATOM | 18532 | HD2 | ARG | 1240 | 63.291 | 47.161 | 35.712 | 0.00 | 0.00 |
| ATOM | 18533 | HD3 | ARG | 1240 | 62.860 | 46.095 | 34.397 | 0.00 | 0.00 |
| ATOM | 18534 | NE  | ARG | 1240 | 63.196 | 45.186 | 36.231 | 0.00 | 0.00 |

|      |       |      |     |      |        |        |        |      |      |
|------|-------|------|-----|------|--------|--------|--------|------|------|
| ATOM | 18535 | HE   | ARG | 1240 | 63.966 | 44.634 | 36.583 | 0.00 | 0.00 |
| ATOM | 18536 | CZ   | ARG | 1240 | 62.041 | 44.828 | 36.759 | 0.00 | 0.00 |
| ATOM | 18537 | NH1  | ARG | 1240 | 60.912 | 45.482 | 36.547 | 0.00 | 0.00 |
| ATOM | 18538 | 1HH1 | ARG | 1240 | 60.018 | 45.068 | 36.769 | 0.00 | 0.00 |
| ATOM | 18539 | 2HH1 | ARG | 1240 | 60.977 | 46.256 | 35.900 | 0.00 | 0.00 |
| ATOM | 18540 | NH2  | ARG | 1240 | 61.948 | 43.835 | 37.589 | 0.00 | 0.00 |
| ATOM | 18541 | 1HH2 | ARG | 1240 | 60.994 | 43.581 | 37.800 | 0.00 | 0.00 |
| ATOM | 18542 | 2HH2 | ARG | 1240 | 62.781 | 43.381 | 37.937 | 0.00 | 0.00 |
| ATOM | 18543 | C    | ARG | 1240 | 68.222 | 46.735 | 37.197 | 0.00 | 0.00 |
| ATOM | 18544 | O    | ARG | 1240 | 68.422 | 45.969 | 38.157 | 0.00 | 0.00 |
| ATOM | 18545 | N    | THR | 1241 | 68.846 | 47.908 | 37.213 | 0.00 | 0.00 |
| ATOM | 18546 | H    | THR | 1241 | 68.704 | 48.546 | 36.443 | 0.00 | 0.00 |
| ATOM | 18547 | CA   | THR | 1241 | 69.833 | 48.208 | 38.231 | 0.00 | 0.00 |
| ATOM | 18548 | HA   | THR | 1241 | 70.531 | 47.371 | 38.249 | 0.00 | 0.00 |
| ATOM | 18549 | CB   | THR | 1241 | 70.702 | 49.370 | 37.737 | 0.00 | 0.00 |
| ATOM | 18550 | HB   | THR | 1241 | 70.156 | 50.312 | 37.682 | 0.00 | 0.00 |
| ATOM | 18551 | CG2  | THR | 1241 | 72.006 | 49.615 | 38.573 | 0.00 | 0.00 |
| ATOM | 18552 | 1HG2 | THR | 1241 | 71.803 | 50.170 | 39.489 | 0.00 | 0.00 |
| ATOM | 18553 | 2HG2 | THR | 1241 | 72.338 | 48.602 | 38.800 | 0.00 | 0.00 |
| ATOM | 18554 | 3HG2 | THR | 1241 | 72.743 | 50.264 | 38.100 | 0.00 | 0.00 |
| ATOM | 18555 | OG1  | THR | 1241 | 71.201 | 49.055 | 36.422 | 0.00 | 0.00 |
| ATOM | 18556 | HG1  | THR | 1241 | 71.843 | 49.728 | 36.186 | 0.00 | 0.00 |
| ATOM | 18557 | C    | THR | 1241 | 69.359 | 48.299 | 39.677 | 0.00 | 0.00 |
| ATOM | 18558 | O    | THR | 1241 | 68.224 | 48.744 | 39.952 | 0.00 | 0.00 |
| ATOM | 18559 | N    | ILE | 1242 | 70.183 | 47.783 | 40.564 | 0.00 | 0.00 |
| ATOM | 18560 | H    | ILE | 1242 | 70.983 | 47.252 | 40.250 | 0.00 | 0.00 |

|            |      |     |      |        |        |        |      |      |
|------------|------|-----|------|--------|--------|--------|------|------|
| ATOM 18561 | CA   | ILE | 1242 | 69.935 | 47.770 | 42.045 | 0.00 | 0.00 |
| ATOM 18562 | HA   | ILE | 1242 | 69.280 | 48.618 | 42.244 | 0.00 | 0.00 |
| ATOM 18563 | CB   | ILE | 1242 | 69.146 | 46.445 | 42.447 | 0.00 | 0.00 |
| ATOM 18564 | HB   | ILE | 1242 | 68.543 | 46.126 | 41.597 | 0.00 | 0.00 |
| ATOM 18565 | CG2  | ILE | 1242 | 70.037 | 45.260 | 42.827 | 0.00 | 0.00 |
| ATOM 18566 | 1HG2 | ILE | 1242 | 70.518 | 45.380 | 43.797 | 0.00 | 0.00 |
| ATOM 18567 | 2HG2 | ILE | 1242 | 69.360 | 44.405 | 42.816 | 0.00 | 0.00 |
| ATOM 18568 | 3HG2 | ILE | 1242 | 70.851 | 45.201 | 42.105 | 0.00 | 0.00 |
| ATOM 18569 | CG1  | ILE | 1242 | 68.132 | 46.734 | 43.611 | 0.00 | 0.00 |
| ATOM 18570 | 2HG1 | ILE | 1242 | 68.626 | 46.898 | 44.569 | 0.00 | 0.00 |
| ATOM 18571 | 3HG1 | ILE | 1242 | 67.720 | 47.679 | 43.257 | 0.00 | 0.00 |
| ATOM 18572 | CD1  | ILE | 1242 | 67.003 | 45.671 | 43.649 | 0.00 | 0.00 |
| ATOM 18573 | 1HD1 | ILE | 1242 | 66.168 | 46.029 | 44.252 | 0.00 | 0.00 |
| ATOM 18574 | 2HD1 | ILE | 1242 | 66.614 | 45.397 | 42.669 | 0.00 | 0.00 |
| ATOM 18575 | 3HD1 | ILE | 1242 | 67.477 | 44.799 | 44.099 | 0.00 | 0.00 |
| ATOM 18576 | C    | ILE | 1242 | 71.211 | 47.950 | 42.896 | 0.00 | 0.00 |
| ATOM 18577 | O    | ILE | 1242 | 72.292 | 47.505 | 42.413 | 0.00 | 0.00 |
| ATOM 18578 | N    | HID | 1243 | 71.100 | 48.466 | 44.127 | 0.00 | 0.00 |
| ATOM 18579 | H    | HID | 1243 | 70.271 | 48.957 | 44.430 | 0.00 | 0.00 |
| ATOM 18580 | CA   | HID | 1243 | 72.218 | 48.519 | 45.095 | 0.00 | 0.00 |
| ATOM 18581 | HA   | HID | 1243 | 73.097 | 48.351 | 44.472 | 0.00 | 0.00 |
| ATOM 18582 | CB   | HID | 1243 | 72.300 | 49.880 | 45.722 | 0.00 | 0.00 |
| ATOM 18583 | HB2  | HID | 1243 | 72.460 | 50.555 | 44.881 | 0.00 | 0.00 |
| ATOM 18584 | HB3  | HID | 1243 | 71.309 | 50.131 | 46.098 | 0.00 | 0.00 |
| ATOM 18585 | CG   | HID | 1243 | 73.331 | 50.102 | 46.849 | 0.00 | 0.00 |
| ATOM 18586 | ND1  | HID | 1243 | 74.315 | 49.314 | 47.325 | 0.00 | 0.00 |

|      |       |      |     |      |        |        |        |      |      |
|------|-------|------|-----|------|--------|--------|--------|------|------|
| ATOM | 18587 | HD1  | HID | 1243 | 74.625 | 48.447 | 46.910 | 0.00 | 0.00 |
| ATOM | 18588 | CE1  | HID | 1243 | 74.873 | 49.853 | 48.403 | 0.00 | 0.00 |
| ATOM | 18589 | HE1  | HID | 1243 | 75.736 | 49.431 | 48.896 | 0.00 | 0.00 |
| ATOM | 18590 | NE2  | HID | 1243 | 74.262 | 51.044 | 48.600 | 0.00 | 0.00 |
| ATOM | 18591 | CD2  | HID | 1243 | 73.289 | 51.222 | 47.598 | 0.00 | 0.00 |
| ATOM | 18592 | HD2  | HID | 1243 | 72.562 | 52.019 | 47.562 | 0.00 | 0.00 |
| ATOM | 18593 | C    | HID | 1243 | 72.006 | 47.533 | 46.190 | 0.00 | 0.00 |
| ATOM | 18594 | O    | HID | 1243 | 70.950 | 47.503 | 46.927 | 0.00 | 0.00 |
| ATOM | 18595 | N    | THR | 1244 | 73.013 | 46.649 | 46.315 | 0.00 | 0.00 |
| ATOM | 18596 | H    | THR | 1244 | 73.758 | 46.603 | 45.634 | 0.00 | 0.00 |
| ATOM | 18597 | CA   | THR | 1244 | 72.977 | 45.651 | 47.406 | 0.00 | 0.00 |
| ATOM | 18598 | HA   | THR | 1244 | 71.962 | 45.650 | 47.803 | 0.00 | 0.00 |
| ATOM | 18599 | CB   | THR | 1244 | 73.322 | 44.227 | 46.934 | 0.00 | 0.00 |
| ATOM | 18600 | HB   | THR | 1244 | 73.638 | 43.644 | 47.799 | 0.00 | 0.00 |
| ATOM | 18601 | CG2  | THR | 1244 | 72.213 | 43.559 | 46.071 | 0.00 | 0.00 |
| ATOM | 18602 | 1HG2 | THR | 1244 | 71.250 | 43.753 | 46.544 | 0.00 | 0.00 |
| ATOM | 18603 | 2HG2 | THR | 1244 | 72.113 | 44.037 | 45.097 | 0.00 | 0.00 |
| ATOM | 18604 | 3HG2 | THR | 1244 | 72.505 | 42.527 | 45.875 | 0.00 | 0.00 |
| ATOM | 18605 | OG1  | THR | 1244 | 74.366 | 44.328 | 46.081 | 0.00 | 0.00 |
| ATOM | 18606 | HG1  | THR | 1244 | 75.135 | 44.183 | 46.638 | 0.00 | 0.00 |
| ATOM | 18607 | C    | THR | 1244 | 73.820 | 46.084 | 48.642 | 0.00 | 0.00 |
| ATOM | 18608 | O    | THR | 1244 | 74.945 | 46.494 | 48.474 | 0.00 | 0.00 |
| ATOM | 18609 | N    | PHE | 1245 | 73.325 | 45.733 | 49.778 | 0.00 | 0.00 |
| ATOM | 18610 | H    | PHE | 1245 | 72.428 | 45.267 | 49.757 | 0.00 | 0.00 |
| ATOM | 18611 | CA   | PHE | 1245 | 73.929 | 45.813 | 51.110 | 0.00 | 0.00 |
| ATOM | 18612 | HA   | PHE | 1245 | 74.749 | 46.514 | 50.952 | 0.00 | 0.00 |

|      |       |     |     |      |        |        |        |      |      |
|------|-------|-----|-----|------|--------|--------|--------|------|------|
| ATOM | 18613 | CB  | PHE | 1245 | 73.096 | 46.465 | 52.196 | 0.00 | 0.00 |
| ATOM | 18614 | HB2 | PHE | 1245 | 72.150 | 45.937 | 52.314 | 0.00 | 0.00 |
| ATOM | 18615 | HB3 | PHE | 1245 | 73.554 | 46.529 | 53.183 | 0.00 | 0.00 |
| ATOM | 18616 | CG  | PHE | 1245 | 72.715 | 47.890 | 51.754 | 0.00 | 0.00 |
| ATOM | 18617 | CD1 | PHE | 1245 | 73.703 | 48.936 | 51.744 | 0.00 | 0.00 |
| ATOM | 18618 | HD1 | PHE | 1245 | 74.767 | 48.840 | 51.899 | 0.00 | 0.00 |
| ATOM | 18619 | CE1 | PHE | 1245 | 73.353 | 50.252 | 51.435 | 0.00 | 0.00 |
| ATOM | 18620 | HE1 | PHE | 1245 | 74.113 | 50.997 | 51.250 | 0.00 | 0.00 |
| ATOM | 18621 | CZ  | PHE | 1245 | 72.009 | 50.576 | 51.189 | 0.00 | 0.00 |
| ATOM | 18622 | HZ  | PHE | 1245 | 71.775 | 51.608 | 50.974 | 0.00 | 0.00 |
| ATOM | 18623 | CE2 | PHE | 1245 | 71.023 | 49.549 | 51.195 | 0.00 | 0.00 |
| ATOM | 18624 | HE2 | PHE | 1245 | 69.995 | 49.764 | 50.944 | 0.00 | 0.00 |
| ATOM | 18625 | CD2 | PHE | 1245 | 71.362 | 48.183 | 51.407 | 0.00 | 0.00 |
| ATOM | 18626 | HD2 | PHE | 1245 | 70.643 | 47.395 | 51.243 | 0.00 | 0.00 |
| ATOM | 18627 | C   | PHE | 1245 | 74.460 | 44.517 | 51.532 | 0.00 | 0.00 |
| ATOM | 18628 | O   | PHE | 1245 | 73.724 | 43.485 | 51.274 | 0.00 | 0.00 |
| ATOM | 18629 | N   | H12 | 1246 | 75.548 | 44.417 | 52.332 | 0.00 | 0.00 |
| ATOM | 18630 | H   | H12 | 1246 | 76.118 | 45.248 | 52.398 | 0.00 | 0.00 |
| ATOM | 18631 | CA  | H12 | 1246 | 76.050 | 43.257 | 53.101 | 0.00 | 0.00 |
| ATOM | 18632 | HA  | H12 | 1246 | 77.124 | 43.392 | 53.232 | 0.00 | 0.00 |
| ATOM | 18633 | CB  | H12 | 1246 | 75.433 | 43.367 | 54.487 | 0.00 | 0.00 |
| ATOM | 18634 | HB2 | H12 | 1246 | 75.622 | 42.425 | 55.001 | 0.00 | 0.00 |
| ATOM | 18635 | HB3 | H12 | 1246 | 75.954 | 44.179 | 54.994 | 0.00 | 0.00 |
| ATOM | 18636 | CG  | H12 | 1246 | 73.911 | 43.604 | 54.682 | 0.00 | 0.00 |
| ATOM | 18637 | ND1 | H12 | 1246 | 72.927 | 42.907 | 54.101 | 0.00 | 0.00 |
| ATOM | 18638 | HD1 | H12 | 1246 | 73.114 | 42.109 | 53.511 | 0.00 | 0.00 |



|      |       |      |     |      |        |        |        |      |      |
|------|-------|------|-----|------|--------|--------|--------|------|------|
| ATOM | 18639 | CE1  | H12 | 1246 | 71.740 | 43.339 | 54.448 | 0.00 | 0.00 |
| ATOM | 18640 | HE1  | H12 | 1246 | 70.844 | 42.753 | 54.310 | 0.00 | 0.00 |
| ATOM | 18641 | NE2  | H12 | 1246 | 71.910 | 44.385 | 55.313 | 0.00 | 0.00 |
| ATOM | 18642 | CD2  | H12 | 1246 | 73.287 | 44.605 | 55.436 | 0.00 | 0.00 |
| ATOM | 18643 | HD2  | H12 | 1246 | 73.703 | 45.342 | 56.107 | 0.00 | 0.00 |
| ATOM | 18644 | C    | H12 | 1246 | 75.868 | 41.981 | 52.198 | 0.00 | 0.00 |
| ATOM | 18645 | O    | H12 | 1246 | 75.138 | 41.047 | 52.499 | 0.00 | 0.00 |
| ATOM | 18646 | N    | THR | 1247 | 76.398 | 42.070 | 50.954 | 0.00 | 0.00 |
| ATOM | 18647 | H    | THR | 1247 | 77.009 | 42.838 | 50.714 | 0.00 | 0.00 |
| ATOM | 18648 | CA   | THR | 1247 | 76.131 | 41.158 | 49.892 | 0.00 | 0.00 |
| ATOM | 18649 | HA   | THR | 1247 | 75.074 | 40.894 | 49.868 | 0.00 | 0.00 |
| ATOM | 18650 | CB   | THR | 1247 | 76.457 | 41.937 | 48.580 | 0.00 | 0.00 |
| ATOM | 18651 | HB   | THR | 1247 | 77.534 | 41.817 | 48.463 | 0.00 | 0.00 |
| ATOM | 18652 | CG2  | THR | 1247 | 75.767 | 41.438 | 47.288 | 0.00 | 0.00 |
| ATOM | 18653 | 1HG2 | THR | 1247 | 76.058 | 41.936 | 46.363 | 0.00 | 0.00 |
| ATOM | 18654 | 2HG2 | THR | 1247 | 75.945 | 40.365 | 47.218 | 0.00 | 0.00 |
| ATOM | 18655 | 3HG2 | THR | 1247 | 74.681 | 41.492 | 47.360 | 0.00 | 0.00 |
| ATOM | 18656 | OG1  | THR | 1247 | 76.223 | 43.380 | 48.586 | 0.00 | 0.00 |
| ATOM | 18657 | HG1  | THR | 1247 | 76.869 | 43.744 | 49.196 | 0.00 | 0.00 |
| ATOM | 18658 | C    | THR | 1247 | 76.942 | 39.813 | 49.998 | 0.00 | 0.00 |
| ATOM | 18659 | O    | THR | 1247 | 76.972 | 39.081 | 49.046 | 0.00 | 0.00 |
| ATOM | 18660 | N    | GLU | 1248 | 77.555 | 39.408 | 51.137 | 0.00 | 0.00 |
| ATOM | 18661 | H    | GLU | 1248 | 77.599 | 40.042 | 51.923 | 0.00 | 0.00 |
| ATOM | 18662 | CA   | GLU | 1248 | 77.809 | 37.984 | 51.429 | 0.00 | 0.00 |
| ATOM | 18663 | HA   | GLU | 1248 | 78.003 | 37.464 | 50.491 | 0.00 | 0.00 |
| ATOM | 18664 | CB   | GLU | 1248 | 79.016 | 37.871 | 52.351 | 0.00 | 0.00 |

|      |       |     |     |      |        |        |        |      |      |
|------|-------|-----|-----|------|--------|--------|--------|------|------|
| ATOM | 18665 | HB2 | GLU | 1248 | 79.797 | 38.469 | 51.882 | 0.00 | 0.00 |
| ATOM | 18666 | HB3 | GLU | 1248 | 78.739 | 38.279 | 53.323 | 0.00 | 0.00 |
| ATOM | 18667 | CG  | GLU | 1248 | 79.618 | 36.441 | 52.676 | 0.00 | 0.00 |
| ATOM | 18668 | HG2 | GLU | 1248 | 79.699 | 35.726 | 51.857 | 0.00 | 0.00 |
| ATOM | 18669 | HG3 | GLU | 1248 | 80.627 | 36.690 | 53.006 | 0.00 | 0.00 |
| ATOM | 18670 | CD  | GLU | 1248 | 78.863 | 35.599 | 53.761 | 0.00 | 0.00 |
| ATOM | 18671 | OE1 | GLU | 1248 | 77.976 | 36.150 | 54.416 | 0.00 | 0.00 |
| ATOM | 18672 | OE2 | GLU | 1248 | 78.907 | 34.371 | 53.756 | 0.00 | 0.00 |
| ATOM | 18673 | C   | GLU | 1248 | 76.625 | 37.292 | 52.089 | 0.00 | 0.00 |
| ATOM | 18674 | O   | GLU | 1248 | 76.415 | 36.067 | 51.887 | 0.00 | 0.00 |
| ATOM | 18675 | N   | GLY | 1249 | 75.786 | 38.031 | 52.811 | 0.00 | 0.00 |
| ATOM | 18676 | H   | GLY | 1249 | 75.903 | 39.034 | 52.815 | 0.00 | 0.00 |
| ATOM | 18677 | CA  | GLY | 1249 | 74.727 | 37.541 | 53.621 | 0.00 | 0.00 |
| ATOM | 18678 | HA2 | GLY | 1249 | 73.750 | 37.898 | 53.296 | 0.00 | 0.00 |
| ATOM | 18679 | HA3 | GLY | 1249 | 74.664 | 36.452 | 53.613 | 0.00 | 0.00 |
| ATOM | 18680 | C   | GLY | 1249 | 74.906 | 37.807 | 55.146 | 0.00 | 0.00 |
| ATOM | 18681 | O   | GLY | 1249 | 73.952 | 37.644 | 55.922 | 0.00 | 0.00 |
| ATOM | 18682 | N   | ALA | 1250 | 76.067 | 38.406 | 55.614 | 0.00 | 0.00 |
| ATOM | 18683 | H   | ALA | 1250 | 76.781 | 38.437 | 54.900 | 0.00 | 0.00 |
| ATOM | 18684 | CA  | ALA | 1250 | 76.491 | 38.699 | 56.971 | 0.00 | 0.00 |
| ATOM | 18685 | HA  | ALA | 1250 | 76.359 | 37.754 | 57.497 | 0.00 | 0.00 |
| ATOM | 18686 | CB  | ALA | 1250 | 78.024 | 39.012 | 56.803 | 0.00 | 0.00 |
| ATOM | 18687 | HB1 | ALA | 1250 | 78.176 | 40.037 | 56.465 | 0.00 | 0.00 |
| ATOM | 18688 | HB2 | ALA | 1250 | 78.472 | 39.105 | 57.792 | 0.00 | 0.00 |
| ATOM | 18689 | HB3 | ALA | 1250 | 78.538 | 38.260 | 56.205 | 0.00 | 0.00 |
| ATOM | 18690 | C   | ALA | 1250 | 75.662 | 39.698 | 57.800 | 0.00 | 0.00 |

|      |       |     |     |      |        |        |        |      |      |
|------|-------|-----|-----|------|--------|--------|--------|------|------|
| ATOM | 18691 | O   | ALA | 1250 | 75.263 | 39.412 | 58.927 | 0.00 | 0.00 |
| ATOM | 18692 | N   | GLY | 1251 | 75.226 | 40.720 | 57.072 | 0.00 | 0.00 |
| ATOM | 18693 | H   | GLY | 1251 | 75.634 | 40.954 | 56.178 | 0.00 | 0.00 |
| ATOM | 18694 | CA  | GLY | 1251 | 74.077 | 41.516 | 57.566 | 0.00 | 0.00 |
| ATOM | 18695 | HA2 | GLY | 1251 | 74.169 | 41.601 | 58.648 | 0.00 | 0.00 |
| ATOM | 18696 | HA3 | GLY | 1251 | 74.164 | 42.517 | 57.144 | 0.00 | 0.00 |
| ATOM | 18697 | C   | GLY | 1251 | 72.739 | 40.899 | 57.236 | 0.00 | 0.00 |
| ATOM | 18698 | O   | GLY | 1251 | 71.798 | 41.132 | 57.973 | 0.00 | 0.00 |
| ATOM | 18699 | N   | GLY | 1252 | 72.677 | 40.180 | 56.055 | 0.00 | 0.00 |
| ATOM | 18700 | H   | GLY | 1252 | 73.494 | 40.145 | 55.463 | 0.00 | 0.00 |
| ATOM | 18701 | CA  | GLY | 1252 | 71.435 | 39.635 | 55.450 | 0.00 | 0.00 |
| ATOM | 18702 | HA2 | GLY | 1252 | 71.011 | 38.837 | 56.060 | 0.00 | 0.00 |
| ATOM | 18703 | HA3 | GLY | 1252 | 70.720 | 40.445 | 55.308 | 0.00 | 0.00 |
| ATOM | 18704 | C   | GLY | 1252 | 71.590 | 39.197 | 53.978 | 0.00 | 0.00 |
| ATOM | 18705 | O   | GLY | 1252 | 72.101 | 39.989 | 53.169 | 0.00 | 0.00 |
| ATOM | 18706 | N   | GLY | 1253 | 71.120 | 37.974 | 53.712 | 0.00 | 0.00 |
| ATOM | 18707 | H   | GLY | 1253 | 71.047 | 37.272 | 54.434 | 0.00 | 0.00 |
| ATOM | 18708 | CA  | GLY | 1253 | 70.838 | 37.469 | 52.388 | 0.00 | 0.00 |
| ATOM | 18709 | HA2 | GLY | 1253 | 69.981 | 37.973 | 51.939 | 0.00 | 0.00 |
| ATOM | 18710 | HA3 | GLY | 1253 | 71.681 | 37.637 | 51.718 | 0.00 | 0.00 |
| ATOM | 18711 | C   | GLY | 1253 | 70.606 | 35.985 | 52.220 | 0.00 | 0.00 |
| ATOM | 18712 | O   | GLY | 1253 | 70.952 | 35.222 | 53.121 | 0.00 | 0.00 |
| ATOM | 18713 | N   | HIP | 1254 | 70.199 | 35.517 | 51.024 | 0.00 | 0.00 |
| ATOM | 18714 | H   | HIP | 1254 | 69.817 | 36.201 | 50.387 | 0.00 | 0.00 |
| ATOM | 18715 | CA  | HIP | 1254 | 70.254 | 34.106 | 50.621 | 0.00 | 0.00 |
| ATOM | 18716 | HA  | HIP | 1254 | 69.706 | 33.499 | 51.342 | 0.00 | 0.00 |

|            |     |     |      |        |        |        |      |      |
|------------|-----|-----|------|--------|--------|--------|------|------|
| ATOM 18717 | CB  | HIP | 1254 | 69.617 | 34.059 | 49.205 | 0.00 | 0.00 |
| ATOM 18718 | HB2 | HIP | 1254 | 69.986 | 34.825 | 48.524 | 0.00 | 0.00 |
| ATOM 18719 | HB3 | HIP | 1254 | 69.856 | 33.084 | 48.781 | 0.00 | 0.00 |
| ATOM 18720 | CG  | HIP | 1254 | 68.068 | 34.174 | 49.148 | 0.00 | 0.00 |
| ATOM 18721 | ND1 | HIP | 1254 | 67.211 | 33.200 | 49.654 | 0.00 | 0.00 |
| ATOM 18722 | HD1 | HIP | 1254 | 67.424 | 32.483 | 50.332 | 0.00 | 0.00 |
| ATOM 18723 | CE1 | HIP | 1254 | 65.937 | 33.652 | 49.508 | 0.00 | 0.00 |
| ATOM 18724 | HE1 | HIP | 1254 | 65.095 | 33.347 | 50.112 | 0.00 | 0.00 |
| ATOM 18725 | NE2 | HIP | 1254 | 65.924 | 34.856 | 48.948 | 0.00 | 0.00 |
| ATOM 18726 | HE2 | HIP | 1254 | 65.163 | 35.518 | 48.998 | 0.00 | 0.00 |
| ATOM 18727 | CD2 | HIP | 1254 | 67.210 | 35.237 | 48.847 | 0.00 | 0.00 |
| ATOM 18728 | HD2 | HIP | 1254 | 67.569 | 36.150 | 48.396 | 0.00 | 0.00 |
| ATOM 18729 | C   | HIP | 1254 | 71.696 | 33.580 | 50.724 | 0.00 | 0.00 |
| ATOM 18730 | O   | HIP | 1254 | 72.544 | 34.020 | 50.025 | 0.00 | 0.00 |
| ATOM 18731 | N   | ALA | 1255 | 71.901 | 32.512 | 51.486 | 0.00 | 0.00 |
| ATOM 18732 | H   | ALA | 1255 | 71.157 | 32.089 | 52.023 | 0.00 | 0.00 |
| ATOM 18733 | CA  | ALA | 1255 | 73.255 | 31.872 | 51.608 | 0.00 | 0.00 |
| ATOM 18734 | HA  | ALA | 1255 | 73.948 | 32.301 | 50.885 | 0.00 | 0.00 |
| ATOM 18735 | CB  | ALA | 1255 | 73.849 | 32.060 | 53.013 | 0.00 | 0.00 |
| ATOM 18736 | HB1 | ALA | 1255 | 73.033 | 31.996 | 53.733 | 0.00 | 0.00 |
| ATOM 18737 | HB2 | ALA | 1255 | 74.484 | 31.200 | 53.228 | 0.00 | 0.00 |
| ATOM 18738 | HB3 | ALA | 1255 | 74.383 | 33.010 | 53.046 | 0.00 | 0.00 |
| ATOM 18739 | C   | ALA | 1255 | 73.245 | 30.409 | 51.309 | 0.00 | 0.00 |
| ATOM 18740 | O   | ALA | 1255 | 72.168 | 29.833 | 51.440 | 0.00 | 0.00 |
| ATOM 18741 | N   | PRO | 1256 | 74.353 | 29.719 | 50.989 | 0.00 | 0.00 |
| ATOM 18742 | CD  | PRO | 1256 | 74.436 | 28.248 | 51.175 | 0.00 | 0.00 |

|      |       |         |      |        |        |        |      |      |
|------|-------|---------|------|--------|--------|--------|------|------|
| ATOM | 18743 | HD2 PRO | 1256 | 74.247 | 27.960 | 52.210 | 0.00 | 0.00 |
| ATOM | 18744 | HD3 PRO | 1256 | 73.758 | 27.751 | 50.482 | 0.00 | 0.00 |
| ATOM | 18745 | CG PRO  | 1256 | 75.849 | 27.802 | 50.748 | 0.00 | 0.00 |
| ATOM | 18746 | HG2 PRO | 1256 | 76.306 | 27.121 | 51.467 | 0.00 | 0.00 |
| ATOM | 18747 | HG3 PRO | 1256 | 75.702 | 27.312 | 49.786 | 0.00 | 0.00 |
| ATOM | 18748 | CB PRO  | 1256 | 76.676 | 29.128 | 50.682 | 0.00 | 0.00 |
| ATOM | 18749 | HB2 PRO | 1256 | 77.222 | 29.162 | 51.625 | 0.00 | 0.00 |
| ATOM | 18750 | HB3 PRO | 1256 | 77.344 | 29.100 | 49.821 | 0.00 | 0.00 |
| ATOM | 18751 | CA PRO  | 1256 | 75.629 | 30.271 | 50.524 | 0.00 | 0.00 |
| ATOM | 18752 | HA PRO  | 1256 | 76.090 | 31.174 | 50.925 | 0.00 | 0.00 |
| ATOM | 18753 | C PRO   | 1256 | 75.401 | 30.569 | 48.999 | 0.00 | 0.00 |
| ATOM | 18754 | O PRO   | 1256 | 75.249 | 29.723 | 48.162 | 0.00 | 0.00 |
| ATOM | 18755 | N ASP   | 1257 | 75.109 | 31.833 | 48.675 | 0.00 | 0.00 |
| ATOM | 18756 | H ASP   | 1257 | 75.178 | 32.607 | 49.319 | 0.00 | 0.00 |
| ATOM | 18757 | CA ASP  | 1257 | 74.643 | 32.246 | 47.347 | 0.00 | 0.00 |
| ATOM | 18758 | HA ASP  | 1257 | 75.167 | 31.684 | 46.574 | 0.00 | 0.00 |
| ATOM | 18759 | CB ASP  | 1257 | 73.137 | 31.969 | 47.217 | 0.00 | 0.00 |
| ATOM | 18760 | HB2 ASP | 1257 | 72.597 | 32.061 | 48.160 | 0.00 | 0.00 |
| ATOM | 18761 | HB3 ASP | 1257 | 72.733 | 32.781 | 46.613 | 0.00 | 0.00 |
| ATOM | 18762 | CG ASP  | 1257 | 72.838 | 30.653 | 46.513 | 0.00 | 0.00 |
| ATOM | 18763 | OD1 ASP | 1257 | 73.407 | 30.255 | 45.473 | 0.00 | 0.00 |
| ATOM | 18764 | OD2 ASP | 1257 | 72.000 | 29.866 | 46.962 | 0.00 | 0.00 |
| ATOM | 18765 | C ASP   | 1257 | 74.998 | 33.670 | 46.990 | 0.00 | 0.00 |
| ATOM | 18766 | O ASP   | 1257 | 75.653 | 33.938 | 45.941 | 0.00 | 0.00 |
| ATOM | 18767 | N ILE   | 1258 | 74.473 | 34.633 | 47.759 | 0.00 | 0.00 |
| ATOM | 18768 | H ILE   | 1258 | 74.113 | 34.367 | 48.665 | 0.00 | 0.00 |

|            |      |     |      |        |        |        |      |      |
|------------|------|-----|------|--------|--------|--------|------|------|
| ATOM 18769 | CA   | ILE | 1258 | 74.399 | 36.092 | 47.401 | 0.00 | 0.00 |
| ATOM 18770 | HA   | ILE | 1258 | 73.956 | 36.144 | 46.406 | 0.00 | 0.00 |
| ATOM 18771 | CB   | ILE | 1258 | 73.465 | 36.939 | 48.369 | 0.00 | 0.00 |
| ATOM 18772 | HB   | ILE | 1258 | 72.439 | 36.583 | 48.461 | 0.00 | 0.00 |
| ATOM 18773 | CG2  | ILE | 1258 | 73.989 | 36.916 | 49.801 | 0.00 | 0.00 |
| ATOM 18774 | 1HG2 | ILE | 1258 | 73.301 | 37.444 | 50.462 | 0.00 | 0.00 |
| ATOM 18775 | 2HG2 | ILE | 1258 | 74.222 | 35.933 | 50.208 | 0.00 | 0.00 |
| ATOM 18776 | 3HG2 | ILE | 1258 | 74.829 | 37.610 | 49.781 | 0.00 | 0.00 |
| ATOM 18777 | CG1  | ILE | 1258 | 73.370 | 38.430 | 47.903 | 0.00 | 0.00 |
| ATOM 18778 | 2HG1 | ILE | 1258 | 74.291 | 38.996 | 48.050 | 0.00 | 0.00 |
| ATOM 18779 | 3HG1 | ILE | 1258 | 73.196 | 38.485 | 46.828 | 0.00 | 0.00 |
| ATOM 18780 | CD1  | ILE | 1258 | 72.222 | 39.155 | 48.537 | 0.00 | 0.00 |
| ATOM 18781 | 1HD1 | ILE | 1258 | 72.016 | 40.026 | 47.914 | 0.00 | 0.00 |
| ATOM 18782 | 2HD1 | ILE | 1258 | 71.364 | 38.483 | 48.566 | 0.00 | 0.00 |
| ATOM 18783 | 3HD1 | ILE | 1258 | 72.356 | 39.497 | 49.563 | 0.00 | 0.00 |
| ATOM 18784 | C    | ILE | 1258 | 75.796 | 36.728 | 47.303 | 0.00 | 0.00 |
| ATOM 18785 | O    | ILE | 1258 | 75.994 | 37.617 | 46.461 | 0.00 | 0.00 |
| ATOM 18786 | N    | ILE | 1259 | 76.884 | 36.169 | 47.829 | 0.00 | 0.00 |
| ATOM 18787 | H    | ILE | 1259 | 76.776 | 35.359 | 48.423 | 0.00 | 0.00 |
| ATOM 18788 | CA   | ILE | 1259 | 78.306 | 36.439 | 47.469 | 0.00 | 0.00 |
| ATOM 18789 | HA   | ILE | 1259 | 78.576 | 37.408 | 47.887 | 0.00 | 0.00 |
| ATOM 18790 | CB   | ILE | 1259 | 79.092 | 35.309 | 48.232 | 0.00 | 0.00 |
| ATOM 18791 | HB   | ILE | 1259 | 78.724 | 35.272 | 49.257 | 0.00 | 0.00 |
| ATOM 18792 | CG2  | ILE | 1259 | 78.939 | 33.895 | 47.570 | 0.00 | 0.00 |
| ATOM 18793 | 1HG2 | ILE | 1259 | 79.549 | 33.176 | 48.117 | 0.00 | 0.00 |
| ATOM 18794 | 2HG2 | ILE | 1259 | 77.904 | 33.565 | 47.489 | 0.00 | 0.00 |

|      |       |      |     |      |        |        |        |      |      |
|------|-------|------|-----|------|--------|--------|--------|------|------|
| ATOM | 18795 | 3HG2 | ILE | 1259 | 79.387 | 33.979 | 46.580 | 0.00 | 0.00 |
| ATOM | 18796 | CG1  | ILE | 1259 | 80.477 | 35.886 | 48.540 | 0.00 | 0.00 |
| ATOM | 18797 | 2HG1 | ILE | 1259 | 81.105 | 36.235 | 47.720 | 0.00 | 0.00 |
| ATOM | 18798 | 3HG1 | ILE | 1259 | 80.421 | 36.721 | 49.238 | 0.00 | 0.00 |
| ATOM | 18799 | CD1  | ILE | 1259 | 81.354 | 34.899 | 49.230 | 0.00 | 0.00 |
| ATOM | 18800 | 1HD1 | ILE | 1259 | 81.547 | 34.096 | 48.518 | 0.00 | 0.00 |
| ATOM | 18801 | 2HD1 | ILE | 1259 | 82.295 | 35.438 | 49.333 | 0.00 | 0.00 |
| ATOM | 18802 | 3HD1 | ILE | 1259 | 80.964 | 34.531 | 50.179 | 0.00 | 0.00 |
| ATOM | 18803 | C    | ILE | 1259 | 78.652 | 36.461 | 45.965 | 0.00 | 0.00 |
| ATOM | 18804 | O    | ILE | 1259 | 79.562 | 37.172 | 45.586 | 0.00 | 0.00 |
| ATOM | 18805 | N    | THR | 1260 | 77.874 | 35.821 | 45.126 | 0.00 | 0.00 |
| ATOM | 18806 | H    | THR | 1260 | 76.992 | 35.478 | 45.478 | 0.00 | 0.00 |
| ATOM | 18807 | CA   | THR | 1260 | 78.117 | 35.811 | 43.711 | 0.00 | 0.00 |
| ATOM | 18808 | HA   | THR | 1260 | 79.167 | 35.881 | 43.428 | 0.00 | 0.00 |
| ATOM | 18809 | CB   | THR | 1260 | 77.579 | 34.607 | 43.059 | 0.00 | 0.00 |
| ATOM | 18810 | HB   | THR | 1260 | 77.588 | 34.785 | 41.984 | 0.00 | 0.00 |
| ATOM | 18811 | CG2  | THR | 1260 | 78.337 | 33.327 | 43.383 | 0.00 | 0.00 |
| ATOM | 18812 | 1HG2 | THR | 1260 | 79.391 | 33.440 | 43.133 | 0.00 | 0.00 |
| ATOM | 18813 | 2HG2 | THR | 1260 | 78.245 | 33.152 | 44.455 | 0.00 | 0.00 |
| ATOM | 18814 | 3HG2 | THR | 1260 | 77.933 | 32.532 | 42.756 | 0.00 | 0.00 |
| ATOM | 18815 | OG1  | THR | 1260 | 76.256 | 34.431 | 43.364 | 0.00 | 0.00 |
| ATOM | 18816 | HG1  | THR | 1260 | 76.191 | 34.254 | 44.305 | 0.00 | 0.00 |
| ATOM | 18817 | C    | THR | 1260 | 77.568 | 37.031 | 43.013 | 0.00 | 0.00 |
| ATOM | 18818 | O    | THR | 1260 | 77.846 | 37.243 | 41.820 | 0.00 | 0.00 |
| ATOM | 18819 | N    | ALA | 1261 | 76.649 | 37.821 | 43.659 | 0.00 | 0.00 |
| ATOM | 18820 | H    | ALA | 1261 | 76.307 | 37.584 | 44.579 | 0.00 | 0.00 |

|      |       |     |     |      |        |        |        |      |      |
|------|-------|-----|-----|------|--------|--------|--------|------|------|
| ATOM | 18821 | CA  | ALA | 1261 | 75.866 | 38.818 | 42.933 | 0.00 | 0.00 |
| ATOM | 18822 | HA  | ALA | 1261 | 75.299 | 38.271 | 42.180 | 0.00 | 0.00 |
| ATOM | 18823 | CB  | ALA | 1261 | 74.845 | 39.484 | 43.830 | 0.00 | 0.00 |
| ATOM | 18824 | HB1 | ALA | 1261 | 74.329 | 38.772 | 44.474 | 0.00 | 0.00 |
| ATOM | 18825 | HB2 | ALA | 1261 | 75.360 | 40.170 | 44.501 | 0.00 | 0.00 |
| ATOM | 18826 | HB3 | ALA | 1261 | 74.162 | 39.994 | 43.150 | 0.00 | 0.00 |
| ATOM | 18827 | C   | ALA | 1261 | 76.735 | 39.961 | 42.264 | 0.00 | 0.00 |
| ATOM | 18828 | O   | ALA | 1261 | 76.371 | 40.551 | 41.256 | 0.00 | 0.00 |
| ATOM | 18829 | N   | CYS | 1262 | 77.805 | 40.369 | 42.888 | 0.00 | 0.00 |
| ATOM | 18830 | H   | CYS | 1262 | 78.126 | 39.845 | 43.689 | 0.00 | 0.00 |
| ATOM | 18831 | CA  | CYS | 1262 | 78.741 | 41.373 | 42.390 | 0.00 | 0.00 |
| ATOM | 18832 | HA  | CYS | 1262 | 78.407 | 42.406 | 42.486 | 0.00 | 0.00 |
| ATOM | 18833 | CB  | CYS | 1262 | 79.895 | 41.317 | 43.375 | 0.00 | 0.00 |
| ATOM | 18834 | HB2 | CYS | 1262 | 80.592 | 42.107 | 43.096 | 0.00 | 0.00 |
| ATOM | 18835 | HB3 | CYS | 1262 | 79.419 | 41.428 | 44.349 | 0.00 | 0.00 |
| ATOM | 18836 | SG  | CYS | 1262 | 80.786 | 39.647 | 43.215 | 0.00 | 0.00 |
| ATOM | 18837 | HG  | CYS | 1262 | 80.875 | 39.468 | 44.536 | 0.00 | 0.00 |
| ATOM | 18838 | C   | CYS | 1262 | 79.216 | 41.129 | 40.914 | 0.00 | 0.00 |
| ATOM | 18839 | O   | CYS | 1262 | 79.894 | 42.017 | 40.339 | 0.00 | 0.00 |
| ATOM | 18840 | N   | ALA | 1263 | 79.017 | 39.940 | 40.317 | 0.00 | 0.00 |
| ATOM | 18841 | H   | ALA | 1263 | 78.635 | 39.251 | 40.949 | 0.00 | 0.00 |
| ATOM | 18842 | CA  | ALA | 1263 | 79.421 | 39.660 | 38.974 | 0.00 | 0.00 |
| ATOM | 18843 | HA  | ALA | 1263 | 80.295 | 40.266 | 38.735 | 0.00 | 0.00 |
| ATOM | 18844 | CB  | ALA | 1263 | 79.807 | 38.203 | 38.844 | 0.00 | 0.00 |
| ATOM | 18845 | HB1 | ALA | 1263 | 80.537 | 37.937 | 39.608 | 0.00 | 0.00 |
| ATOM | 18846 | HB2 | ALA | 1263 | 78.861 | 37.671 | 38.948 | 0.00 | 0.00 |



|      |       |     |     |      |        |        |        |      |      |
|------|-------|-----|-----|------|--------|--------|--------|------|------|
| ATOM | 18847 | HB3 | ALA | 1263 | 80.334 | 38.108 | 37.895 | 0.00 | 0.00 |
| ATOM | 18848 | C   | ALA | 1263 | 78.374 | 40.065 | 37.890 | 0.00 | 0.00 |
| ATOM | 18849 | O   | ALA | 1263 | 78.653 | 40.004 | 36.679 | 0.00 | 0.00 |
| ATOM | 18850 | N   | HIE | 1264 | 77.235 | 40.536 | 38.328 | 0.00 | 0.00 |
| ATOM | 18851 | H   | HIE | 1264 | 77.083 | 40.621 | 39.323 | 0.00 | 0.00 |
| ATOM | 18852 | CA  | HIE | 1264 | 76.062 | 40.772 | 37.430 | 0.00 | 0.00 |
| ATOM | 18853 | HA  | HIE | 1264 | 76.400 | 40.240 | 36.540 | 0.00 | 0.00 |
| ATOM | 18854 | CB  | HIE | 1264 | 74.803 | 40.128 | 38.019 | 0.00 | 0.00 |
| ATOM | 18855 | HB2 | HIE | 1264 | 74.826 | 40.451 | 39.060 | 0.00 | 0.00 |
| ATOM | 18856 | HB3 | HIE | 1264 | 73.947 | 40.558 | 37.500 | 0.00 | 0.00 |
| ATOM | 18857 | CG  | HIE | 1264 | 74.774 | 38.597 | 38.136 | 0.00 | 0.00 |
| ATOM | 18858 | ND1 | HIE | 1264 | 75.394 | 37.728 | 37.297 | 0.00 | 0.00 |
| ATOM | 18859 | CE1 | HIE | 1264 | 75.427 | 36.500 | 37.846 | 0.00 | 0.00 |
| ATOM | 18860 | HE1 | HIE | 1264 | 75.772 | 35.543 | 37.482 | 0.00 | 0.00 |
| ATOM | 18861 | NE2 | HIE | 1264 | 74.777 | 36.606 | 39.013 | 0.00 | 0.00 |
| ATOM | 18862 | HE2 | HIE | 1264 | 74.743 | 35.884 | 39.719 | 0.00 | 0.00 |
| ATOM | 18863 | CD2 | HIE | 1264 | 74.467 | 37.957 | 39.257 | 0.00 | 0.00 |
| ATOM | 18864 | HD2 | HIE | 1264 | 74.054 | 38.518 | 40.082 | 0.00 | 0.00 |
| ATOM | 18865 | C   | HIE | 1264 | 75.871 | 42.314 | 37.078 | 0.00 | 0.00 |
| ATOM | 18866 | O   | HIE | 1264 | 75.982 | 43.129 | 38.024 | 0.00 | 0.00 |
| ATOM | 18867 | N   | PRO | 1265 | 75.612 | 42.694 | 35.872 | 0.00 | 0.00 |
| ATOM | 18868 | CD  | PRO | 1265 | 75.377 | 41.847 | 34.732 | 0.00 | 0.00 |
| ATOM | 18869 | HD2 | PRO | 1265 | 76.265 | 41.283 | 34.447 | 0.00 | 0.00 |
| ATOM | 18870 | HD3 | PRO | 1265 | 74.509 | 41.214 | 34.921 | 0.00 | 0.00 |
| ATOM | 18871 | CG  | PRO | 1265 | 75.064 | 42.735 | 33.595 | 0.00 | 0.00 |
| ATOM | 18872 | HG2 | PRO | 1265 | 75.263 | 42.307 | 32.612 | 0.00 | 0.00 |

|            |          |      |        |        |        |      |      |
|------------|----------|------|--------|--------|--------|------|------|
| ATOM 18873 | HG3 PRO  | 1265 | 74.054 | 43.139 | 33.657 | 0.00 | 0.00 |
| ATOM 18874 | CB PRO   | 1265 | 75.968 | 43.961 | 33.997 | 0.00 | 0.00 |
| ATOM 18875 | HB2 PRO  | 1265 | 76.999 | 43.868 | 33.655 | 0.00 | 0.00 |
| ATOM 18876 | HB3 PRO  | 1265 | 75.594 | 44.894 | 33.575 | 0.00 | 0.00 |
| ATOM 18877 | CA PRO   | 1265 | 75.984 | 44.042 | 35.538 | 0.00 | 0.00 |
| ATOM 18878 | HA PRO   | 1265 | 77.018 | 44.243 | 35.818 | 0.00 | 0.00 |
| ATOM 18879 | C PRO    | 1265 | 75.021 | 45.146 | 36.018 | 0.00 | 0.00 |
| ATOM 18880 | O PRO    | 1265 | 75.314 | 46.356 | 36.105 | 0.00 | 0.00 |
| ATOM 18881 | N ASN    | 1266 | 73.773 | 44.702 | 36.376 | 0.00 | 0.00 |
| ATOM 18882 | H ASN    | 1266 | 73.491 | 43.753 | 36.175 | 0.00 | 0.00 |
| ATOM 18883 | CA ASN   | 1266 | 72.819 | 45.516 | 37.100 | 0.00 | 0.00 |
| ATOM 18884 | HA ASN   | 1266 | 73.112 | 46.553 | 36.935 | 0.00 | 0.00 |
| ATOM 18885 | CB ASN   | 1266 | 71.503 | 45.248 | 36.385 | 0.00 | 0.00 |
| ATOM 18886 | HB2 ASN  | 1266 | 70.777 | 45.983 | 36.734 | 0.00 | 0.00 |
| ATOM 18887 | HB3 ASN  | 1266 | 71.654 | 45.548 | 35.348 | 0.00 | 0.00 |
| ATOM 18888 | CG ASN   | 1266 | 70.914 | 43.933 | 36.607 | 0.00 | 0.00 |
| ATOM 18889 | OD1 ASN  | 1266 | 71.289 | 42.963 | 35.925 | 0.00 | 0.00 |
| ATOM 18890 | ND2 ASN  | 1266 | 70.318 | 43.704 | 37.752 | 0.00 | 0.00 |
| ATOM 18891 | 1HD2 ASN | 1266 | 70.164 | 42.738 | 38.005 | 0.00 | 0.00 |
| ATOM 18892 | 2HD2 ASN | 1266 | 70.218 | 44.456 | 38.419 | 0.00 | 0.00 |
| ATOM 18893 | C ASN    | 1266 | 72.842 | 45.364 | 38.629 | 0.00 | 0.00 |
| ATOM 18894 | O ASN    | 1266 | 71.910 | 45.792 | 39.294 | 0.00 | 0.00 |
| ATOM 18895 | N ILE    | 1267 | 73.882 | 44.860 | 39.228 | 0.00 | 0.00 |
| ATOM 18896 | H ILE    | 1267 | 74.634 | 44.495 | 38.661 | 0.00 | 0.00 |
| ATOM 18897 | CA ILE   | 1267 | 74.106 | 44.892 | 40.730 | 0.00 | 0.00 |
| ATOM 18898 | HA ILE   | 1267 | 73.176 | 45.219 | 41.193 | 0.00 | 0.00 |

|            |      |     |      |        |        |        |      |      |
|------------|------|-----|------|--------|--------|--------|------|------|
| ATOM 18899 | CB   | ILE | 1267 | 74.420 | 43.436 | 41.126 | 0.00 | 0.00 |
| ATOM 18900 | HB   | ILE | 1267 | 75.349 | 43.049 | 40.709 | 0.00 | 0.00 |
| ATOM 18901 | CG2  | ILE | 1267 | 74.691 | 43.324 | 42.621 | 0.00 | 0.00 |
| ATOM 18902 | 1HG2 | ILE | 1267 | 75.574 | 43.909 | 42.878 | 0.00 | 0.00 |
| ATOM 18903 | 2HG2 | ILE | 1267 | 73.889 | 43.700 | 43.256 | 0.00 | 0.00 |
| ATOM 18904 | 3HG2 | ILE | 1267 | 74.962 | 42.349 | 43.027 | 0.00 | 0.00 |
| ATOM 18905 | CG1  | ILE | 1267 | 73.230 | 42.415 | 40.784 | 0.00 | 0.00 |
| ATOM 18906 | 2HG1 | ILE | 1267 | 73.281 | 42.345 | 39.698 | 0.00 | 0.00 |
| ATOM 18907 | 3HG1 | ILE | 1267 | 73.502 | 41.462 | 41.238 | 0.00 | 0.00 |
| ATOM 18908 | CD1  | ILE | 1267 | 71.837 | 42.798 | 41.281 | 0.00 | 0.00 |
| ATOM 18909 | 1HD1 | ILE | 1267 | 71.585 | 43.709 | 40.738 | 0.00 | 0.00 |
| ATOM 18910 | 2HD1 | ILE | 1267 | 71.324 | 41.869 | 41.033 | 0.00 | 0.00 |
| ATOM 18911 | 3HD1 | ILE | 1267 | 71.809 | 42.980 | 42.355 | 0.00 | 0.00 |
| ATOM 18912 | C    | ILE | 1267 | 75.248 | 45.775 | 41.106 | 0.00 | 0.00 |
| ATOM 18913 | O    | ILE | 1267 | 76.295 | 45.736 | 40.517 | 0.00 | 0.00 |
| ATOM 18914 | N    | LEU | 1268 | 75.064 | 46.609 | 42.141 | 0.00 | 0.00 |
| ATOM 18915 | H    | LEU | 1268 | 74.114 | 46.633 | 42.484 | 0.00 | 0.00 |
| ATOM 18916 | CA   | LEU | 1268 | 76.076 | 47.605 | 42.599 | 0.00 | 0.00 |
| ATOM 18917 | HA   | LEU | 1268 | 77.046 | 47.465 | 42.121 | 0.00 | 0.00 |
| ATOM 18918 | CB   | LEU | 1268 | 75.526 | 49.034 | 42.314 | 0.00 | 0.00 |
| ATOM 18919 | HB2  | LEU | 1268 | 74.681 | 49.327 | 42.937 | 0.00 | 0.00 |
| ATOM 18920 | HB3  | LEU | 1268 | 76.375 | 49.696 | 42.481 | 0.00 | 0.00 |
| ATOM 18921 | CG   | LEU | 1268 | 75.197 | 49.356 | 40.829 | 0.00 | 0.00 |
| ATOM 18922 | HG   | LEU | 1268 | 74.317 | 48.809 | 40.490 | 0.00 | 0.00 |
| ATOM 18923 | CD1  | LEU | 1268 | 74.886 | 50.853 | 40.768 | 0.00 | 0.00 |
| ATOM 18924 | 1HD1 | LEU | 1268 | 74.414 | 51.134 | 39.826 | 0.00 | 0.00 |

|            |      |     |      |        |        |        |      |      |
|------------|------|-----|------|--------|--------|--------|------|------|
| ATOM 18925 | 2HD1 | LEU | 1268 | 74.138 | 51.126 | 41.512 | 0.00 | 0.00 |
| ATOM 18926 | 3HD1 | LEU | 1268 | 75.760 | 51.488 | 40.909 | 0.00 | 0.00 |
| ATOM 18927 | CD2  | LEU | 1268 | 76.341 | 49.188 | 39.797 | 0.00 | 0.00 |
| ATOM 18928 | 1HD2 | LEU | 1268 | 77.171 | 49.840 | 40.070 | 0.00 | 0.00 |
| ATOM 18929 | 2HD2 | LEU | 1268 | 76.674 | 48.153 | 39.713 | 0.00 | 0.00 |
| ATOM 18930 | 3HD2 | LEU | 1268 | 76.021 | 49.486 | 38.798 | 0.00 | 0.00 |
| ATOM 18931 | C    | LEU | 1268 | 76.302 | 47.306 | 44.111 | 0.00 | 0.00 |
| ATOM 18932 | O    | LEU | 1268 | 75.499 | 47.776 | 44.928 | 0.00 | 0.00 |
| ATOM 18933 | N    | PRO | 1269 | 77.293 | 46.505 | 44.488 | 0.00 | 0.00 |
| ATOM 18934 | CD   | PRO | 1269 | 78.068 | 45.716 | 43.636 | 0.00 | 0.00 |
| ATOM 18935 | HD2  | PRO | 1269 | 77.390 | 45.211 | 42.948 | 0.00 | 0.00 |
| ATOM 18936 | HD3  | PRO | 1269 | 78.738 | 46.314 | 43.020 | 0.00 | 0.00 |
| ATOM 18937 | CG   | PRO | 1269 | 78.867 | 44.764 | 44.461 | 0.00 | 0.00 |
| ATOM 18938 | HG2  | PRO | 1269 | 79.165 | 43.861 | 43.929 | 0.00 | 0.00 |
| ATOM 18939 | HG3  | PRO | 1269 | 79.740 | 45.266 | 44.878 | 0.00 | 0.00 |
| ATOM 18940 | CB   | PRO | 1269 | 77.970 | 44.413 | 45.674 | 0.00 | 0.00 |
| ATOM 18941 | HB2  | PRO | 1269 | 77.211 | 43.732 | 45.290 | 0.00 | 0.00 |
| ATOM 18942 | HB3  | PRO | 1269 | 78.529 | 44.040 | 46.533 | 0.00 | 0.00 |
| ATOM 18943 | CA   | PRO | 1269 | 77.398 | 45.910 | 45.849 | 0.00 | 0.00 |
| ATOM 18944 | HA   | PRO | 1269 | 76.386 | 45.799 | 46.239 | 0.00 | 0.00 |
| ATOM 18945 | C    | PRO | 1269 | 78.224 | 46.751 | 46.907 | 0.00 | 0.00 |
| ATOM 18946 | O    | PRO | 1269 | 79.203 | 47.407 | 46.580 | 0.00 | 0.00 |
| ATOM 18947 | N    | SER | 1270 | 77.763 | 46.563 | 48.211 | 0.00 | 0.00 |
| ATOM 18948 | H    | SER | 1270 | 76.906 | 46.064 | 48.403 | 0.00 | 0.00 |
| ATOM 18949 | CA   | SER | 1270 | 78.580 | 46.928 | 49.454 | 0.00 | 0.00 |
| ATOM 18950 | HA   | SER | 1270 | 79.603 | 47.008 | 49.086 | 0.00 | 0.00 |

|            |      |          |        |        |        |      |      |
|------------|------|----------|--------|--------|--------|------|------|
| ATOM 18951 | CB   | SER 1270 | 78.050 | 48.140 | 50.097 | 0.00 | 0.00 |
| ATOM 18952 | HB2  | SER 1270 | 78.918 | 48.533 | 50.626 | 0.00 | 0.00 |
| ATOM 18953 | HB3  | SER 1270 | 77.754 | 48.967 | 49.452 | 0.00 | 0.00 |
| ATOM 18954 | OG   | SER 1270 | 76.950 | 47.957 | 50.998 | 0.00 | 0.00 |
| ATOM 18955 | HG   | SER 1270 | 76.889 | 48.774 | 51.497 | 0.00 | 0.00 |
| ATOM 18956 | C    | SER 1270 | 78.624 | 45.738 | 50.438 | 0.00 | 0.00 |
| ATOM 18957 | O    | SER 1270 | 77.842 | 44.791 | 50.441 | 0.00 | 0.00 |
| ATOM 18958 | N    | SER 1271 | 79.525 | 45.856 | 51.477 | 0.00 | 0.00 |
| ATOM 18959 | H    | SER 1271 | 80.129 | 46.663 | 51.414 | 0.00 | 0.00 |
| ATOM 18960 | CA   | SER 1271 | 79.784 | 45.056 | 52.670 | 0.00 | 0.00 |
| ATOM 18961 | HA   | SER 1271 | 79.677 | 43.989 | 52.477 | 0.00 | 0.00 |
| ATOM 18962 | CB   | SER 1271 | 81.296 | 45.133 | 53.085 | 0.00 | 0.00 |
| ATOM 18963 | HB2  | SER 1271 | 81.503 | 44.442 | 53.902 | 0.00 | 0.00 |
| ATOM 18964 | HB3  | SER 1271 | 81.902 | 45.089 | 52.180 | 0.00 | 0.00 |
| ATOM 18965 | OG   | SER 1271 | 81.391 | 46.422 | 53.650 | 0.00 | 0.00 |
| ATOM 18966 | HG   | SER 1271 | 80.948 | 46.369 | 54.501 | 0.00 | 0.00 |
| ATOM 18967 | C    | SER 1271 | 78.792 | 45.310 | 53.764 | 0.00 | 0.00 |
| ATOM 18968 | O    | SER 1271 | 78.091 | 46.334 | 53.742 | 0.00 | 0.00 |
| ATOM 18969 | N    | THR 1272 | 78.832 | 44.403 | 54.787 | 0.00 | 0.00 |
| ATOM 18970 | H    | THR 1272 | 79.357 | 43.542 | 54.721 | 0.00 | 0.00 |
| ATOM 18971 | CA   | THR 1272 | 78.512 | 44.827 | 56.206 | 0.00 | 0.00 |
| ATOM 18972 | HA   | THR 1272 | 77.635 | 45.461 | 56.076 | 0.00 | 0.00 |
| ATOM 18973 | CB   | THR 1272 | 78.095 | 43.584 | 57.042 | 0.00 | 0.00 |
| ATOM 18974 | HB   | THR 1272 | 78.946 | 43.193 | 57.601 | 0.00 | 0.00 |
| ATOM 18975 | CG2  | THR 1272 | 77.023 | 43.939 | 58.037 | 0.00 | 0.00 |
| ATOM 18976 | 1HG2 | THR 1272 | 76.116 | 44.186 | 57.485 | 0.00 | 0.00 |

|            |      |     |      |        |        |        |      |      |
|------------|------|-----|------|--------|--------|--------|------|------|
| ATOM 18977 | 2HG2 | THR | 1272 | 76.859 | 43.096 | 58.709 | 0.00 | 0.00 |
| ATOM 18978 | 3HG2 | THR | 1272 | 77.372 | 44.787 | 58.627 | 0.00 | 0.00 |
| ATOM 18979 | OG1  | THR | 1272 | 77.639 | 42.459 | 56.267 | 0.00 | 0.00 |
| ATOM 18980 | HG1  | THR | 1272 | 78.427 | 42.303 | 55.742 | 0.00 | 0.00 |
| ATOM 18981 | C    | THR | 1272 | 79.563 | 45.794 | 56.721 | 0.00 | 0.00 |
| ATOM 18982 | O    | THR | 1272 | 80.572 | 46.077 | 56.074 | 0.00 | 0.00 |
| ATOM 18983 | N    | ASN | 1273 | 79.314 | 46.319 | 57.910 | 0.00 | 0.00 |
| ATOM 18984 | H    | ASN | 1273 | 78.462 | 46.025 | 58.365 | 0.00 | 0.00 |
| ATOM 18985 | CA   | ASN | 1273 | 80.209 | 47.224 | 58.686 | 0.00 | 0.00 |
| ATOM 18986 | HA   | ASN | 1273 | 81.058 | 47.553 | 58.087 | 0.00 | 0.00 |
| ATOM 18987 | CB   | ASN | 1273 | 79.414 | 48.411 | 59.127 | 0.00 | 0.00 |
| ATOM 18988 | HB2  | ASN | 1273 | 78.876 | 48.821 | 58.273 | 0.00 | 0.00 |
| ATOM 18989 | HB3  | ASN | 1273 | 78.630 | 47.941 | 59.722 | 0.00 | 0.00 |
| ATOM 18990 | CG   | ASN | 1273 | 80.139 | 49.663 | 59.774 | 0.00 | 0.00 |
| ATOM 18991 | OD1  | ASN | 1273 | 80.442 | 49.647 | 60.946 | 0.00 | 0.00 |
| ATOM 18992 | ND2  | ASN | 1273 | 80.567 | 50.658 | 59.063 | 0.00 | 0.00 |
| ATOM 18993 | 1HD2 | ASN | 1273 | 80.985 | 51.421 | 59.577 | 0.00 | 0.00 |
| ATOM 18994 | 2HD2 | ASN | 1273 | 80.505 | 50.729 | 58.058 | 0.00 | 0.00 |
| ATOM 18995 | C    | ASN | 1273 | 81.041 | 46.480 | 59.780 | 0.00 | 0.00 |
| ATOM 18996 | O    | ASN | 1273 | 82.170 | 46.791 | 59.813 | 0.00 | 0.00 |
| ATOM 18997 | N    | PRO | 1274 | 80.565 | 45.536 | 60.605 | 0.00 | 0.00 |
| ATOM 18998 | CD   | PRO | 1274 | 79.136 | 45.081 | 60.795 | 0.00 | 0.00 |
| ATOM 18999 | HD2  | PRO | 1274 | 78.384 | 45.819 | 60.516 | 0.00 | 0.00 |
| ATOM 19000 | HD3  | PRO | 1274 | 78.952 | 44.217 | 60.157 | 0.00 | 0.00 |
| ATOM 19001 | CG   | PRO | 1274 | 79.109 | 44.516 | 62.205 | 0.00 | 0.00 |
| ATOM 19002 | HG2  | PRO | 1274 | 78.869 | 45.281 | 62.944 | 0.00 | 0.00 |

|            |          |      |        |        |        |      |      |
|------------|----------|------|--------|--------|--------|------|------|
| ATOM 19003 | HG3 PRO  | 1274 | 78.287 | 43.800 | 62.187 | 0.00 | 0.00 |
| ATOM 19004 | CB PRO   | 1274 | 80.461 | 43.813 | 62.339 | 0.00 | 0.00 |
| ATOM 19005 | HB2 PRO  | 1274 | 80.733 | 43.736 | 63.392 | 0.00 | 0.00 |
| ATOM 19006 | HB3 PRO  | 1274 | 80.476 | 42.859 | 61.813 | 0.00 | 0.00 |
| ATOM 19007 | CA PRO   | 1274 | 81.426 | 44.793 | 61.581 | 0.00 | 0.00 |
| ATOM 19008 | HA PRO   | 1274 | 81.905 | 45.469 | 62.288 | 0.00 | 0.00 |
| ATOM 19009 | C PRO    | 1274 | 82.551 | 44.027 | 60.872 | 0.00 | 0.00 |
| ATOM 19010 | O PRO    | 1274 | 83.552 | 43.767 | 61.518 | 0.00 | 0.00 |
| ATOM 19011 | N THR    | 1275 | 82.353 | 43.553 | 59.625 | 0.00 | 0.00 |
| ATOM 19012 | H THR    | 1275 | 81.629 | 43.884 | 59.003 | 0.00 | 0.00 |
| ATOM 19013 | CA THR   | 1275 | 83.275 | 42.720 | 58.866 | 0.00 | 0.00 |
| ATOM 19014 | HA THR   | 1275 | 83.875 | 42.043 | 59.474 | 0.00 | 0.00 |
| ATOM 19015 | CB THR   | 1275 | 82.443 | 41.922 | 57.790 | 0.00 | 0.00 |
| ATOM 19016 | HB THR   | 1275 | 83.123 | 41.491 | 57.056 | 0.00 | 0.00 |
| ATOM 19017 | CG2 THR  | 1275 | 81.580 | 40.920 | 58.515 | 0.00 | 0.00 |
| ATOM 19018 | 1HG2 THR | 1275 | 81.074 | 40.390 | 57.709 | 0.00 | 0.00 |
| ATOM 19019 | 2HG2 THR | 1275 | 82.229 | 40.267 | 59.099 | 0.00 | 0.00 |
| ATOM 19020 | 3HG2 THR | 1275 | 80.894 | 41.493 | 59.140 | 0.00 | 0.00 |
| ATOM 19021 | OG1 THR  | 1275 | 81.577 | 42.897 | 57.192 | 0.00 | 0.00 |
| ATOM 19022 | HG1 THR  | 1275 | 81.158 | 42.498 | 56.426 | 0.00 | 0.00 |
| ATOM 19023 | C THR    | 1275 | 84.271 | 43.557 | 58.026 | 0.00 | 0.00 |
| ATOM 19024 | O THR    | 1275 | 84.989 | 43.010 | 57.242 | 0.00 | 0.00 |
| ATOM 19025 | N LEU    | 1276 | 84.354 | 44.892 | 58.233 | 0.00 | 0.00 |
| ATOM 19026 | H LEU    | 1276 | 83.557 | 45.369 | 58.629 | 0.00 | 0.00 |
| ATOM 19027 | CA LEU   | 1276 | 85.380 | 45.749 | 57.620 | 0.00 | 0.00 |
| ATOM 19028 | HA LEU   | 1276 | 85.779 | 45.255 | 56.734 | 0.00 | 0.00 |

|            |               |        |        |        |      |      |
|------------|---------------|--------|--------|--------|------|------|
| ATOM 19029 | CB LEU 1276   | 84.532 | 47.010 | 57.150 | 0.00 | 0.00 |
| ATOM 19030 | HB2 LEU 1276  | 83.541 | 46.664 | 56.856 | 0.00 | 0.00 |
| ATOM 19031 | HB3 LEU 1276  | 84.484 | 47.709 | 57.985 | 0.00 | 0.00 |
| ATOM 19032 | CG LEU 1276   | 85.081 | 47.834 | 56.002 | 0.00 | 0.00 |
| ATOM 19033 | HG LEU 1276   | 86.126 | 48.034 | 56.241 | 0.00 | 0.00 |
| ATOM 19034 | CD1 LEU 1276  | 84.939 | 47.172 | 54.632 | 0.00 | 0.00 |
| ATOM 19035 | 1HD1 LEU 1276 | 85.272 | 46.137 | 54.703 | 0.00 | 0.00 |
| ATOM 19036 | 2HD1 LEU 1276 | 83.873 | 47.178 | 54.402 | 0.00 | 0.00 |
| ATOM 19037 | 3HD1 LEU 1276 | 85.422 | 47.802 | 53.885 | 0.00 | 0.00 |
| ATOM 19038 | CD2 LEU 1276  | 84.402 | 49.170 | 55.782 | 0.00 | 0.00 |
| ATOM 19039 | 1HD2 LEU 1276 | 84.993 | 49.790 | 55.108 | 0.00 | 0.00 |
| ATOM 19040 | 2HD2 LEU 1276 | 83.427 | 49.082 | 55.302 | 0.00 | 0.00 |
| ATOM 19041 | 3HD2 LEU 1276 | 84.230 | 49.732 | 56.701 | 0.00 | 0.00 |
| ATOM 19042 | C LEU 1276    | 86.605 | 46.137 | 58.525 | 0.00 | 0.00 |
| ATOM 19043 | O LEU 1276    | 86.435 | 47.044 | 59.384 | 0.00 | 0.00 |
| ATOM 19044 | N PRO 1277    | 87.697 | 45.420 | 58.526 | 0.00 | 0.00 |
| ATOM 19045 | CD PRO 1277   | 88.870 | 45.951 | 59.149 | 0.00 | 0.00 |
| ATOM 19046 | HD2 PRO 1277  | 89.077 | 46.876 | 58.610 | 0.00 | 0.00 |
| ATOM 19047 | HD3 PRO 1277  | 88.550 | 46.082 | 60.183 | 0.00 | 0.00 |
| ATOM 19048 | CG PRO 1277   | 89.917 | 44.815 | 59.043 | 0.00 | 0.00 |
| ATOM 19049 | HG2 PRO 1277  | 90.902 | 45.222 | 58.815 | 0.00 | 0.00 |
| ATOM 19050 | HG3 PRO 1277  | 90.027 | 44.215 | 59.946 | 0.00 | 0.00 |
| ATOM 19051 | CB PRO 1277   | 89.402 | 43.917 | 57.879 | 0.00 | 0.00 |
| ATOM 19052 | HB2 PRO 1277  | 89.783 | 44.218 | 56.903 | 0.00 | 0.00 |
| ATOM 19053 | HB3 PRO 1277  | 89.783 | 42.904 | 58.008 | 0.00 | 0.00 |
| ATOM 19054 | CA PRO 1277   | 87.868 | 44.039 | 58.067 | 0.00 | 0.00 |



|      |       |     |     |      |        |        |        |      |      |
|------|-------|-----|-----|------|--------|--------|--------|------|------|
| ATOM | 19055 | HA  | PRO | 1277 | 87.424 | 43.818 | 57.096 | 0.00 | 0.00 |
| ATOM | 19056 | C   | PRO | 1277 | 87.487 | 43.003 | 59.140 | 0.00 | 0.00 |
| ATOM | 19057 | O   | PRO | 1277 | 87.021 | 43.333 | 60.226 | 0.00 | 0.00 |
| ATOM | 19058 | N   | TYR | 1278 | 87.550 | 41.671 | 58.805 | 0.00 | 0.00 |
| ATOM | 19059 | H   | TYR | 1278 | 87.796 | 41.405 | 57.862 | 0.00 | 0.00 |
| ATOM | 19060 | CA  | TYR | 1278 | 87.212 | 40.604 | 59.697 | 0.00 | 0.00 |
| ATOM | 19061 | HA  | TYR | 1278 | 86.313 | 40.826 | 60.271 | 0.00 | 0.00 |
| ATOM | 19062 | CB  | TYR | 1278 | 86.932 | 39.434 | 58.713 | 0.00 | 0.00 |
| ATOM | 19063 | HB2 | TYR | 1278 | 86.081 | 39.650 | 58.067 | 0.00 | 0.00 |
| ATOM | 19064 | HB3 | TYR | 1278 | 87.770 | 39.255 | 58.040 | 0.00 | 0.00 |
| ATOM | 19065 | CG  | TYR | 1278 | 86.630 | 38.150 | 59.400 | 0.00 | 0.00 |
| ATOM | 19066 | CD1 | TYR | 1278 | 85.347 | 38.067 | 59.958 | 0.00 | 0.00 |
| ATOM | 19067 | HD1 | TYR | 1278 | 84.712 | 38.931 | 59.827 | 0.00 | 0.00 |
| ATOM | 19068 | CE1 | TYR | 1278 | 84.851 | 36.857 | 60.496 | 0.00 | 0.00 |
| ATOM | 19069 | HE1 | TYR | 1278 | 83.846 | 36.751 | 60.879 | 0.00 | 0.00 |
| ATOM | 19070 | CZ  | TYR | 1278 | 85.807 | 35.810 | 60.605 | 0.00 | 0.00 |
| ATOM | 19071 | OH  | TYR | 1278 | 85.352 | 34.762 | 61.355 | 0.00 | 0.00 |
| ATOM | 19072 | HH  | TYR | 1278 | 85.979 | 34.061 | 61.164 | 0.00 | 0.00 |
| ATOM | 19073 | CE2 | TYR | 1278 | 87.078 | 35.825 | 59.994 | 0.00 | 0.00 |
| ATOM | 19074 | HE2 | TYR | 1278 | 87.706 | 34.955 | 60.115 | 0.00 | 0.00 |
| ATOM | 19075 | CD2 | TYR | 1278 | 87.459 | 36.993 | 59.278 | 0.00 | 0.00 |
| ATOM | 19076 | HD2 | TYR | 1278 | 88.489 | 37.033 | 58.954 | 0.00 | 0.00 |
| ATOM | 19077 | C   | TYR | 1278 | 88.298 | 40.368 | 60.779 | 0.00 | 0.00 |
| ATOM | 19078 | O   | TYR | 1278 | 89.303 | 39.738 | 60.489 | 0.00 | 0.00 |
| ATOM | 19079 | N   | THR | 1279 | 88.091 | 40.813 | 62.039 | 0.00 | 0.00 |
| ATOM | 19080 | H   | THR | 1279 | 87.280 | 41.393 | 62.204 | 0.00 | 0.00 |

|      |       |      |     |      |        |        |        |      |      |
|------|-------|------|-----|------|--------|--------|--------|------|------|
| ATOM | 19081 | CA   | THR | 1279 | 88.946 | 40.503 | 63.267 | 0.00 | 0.00 |
| ATOM | 19082 | HA   | THR | 1279 | 89.922 | 40.164 | 62.919 | 0.00 | 0.00 |
| ATOM | 19083 | CB   | THR | 1279 | 89.248 | 41.817 | 64.026 | 0.00 | 0.00 |
| ATOM | 19084 | HB   | THR | 1279 | 90.216 | 41.833 | 64.527 | 0.00 | 0.00 |
| ATOM | 19085 | CG2  | THR | 1279 | 89.366 | 43.160 | 63.240 | 0.00 | 0.00 |
| ATOM | 19086 | 1HG2 | THR | 1279 | 90.334 | 43.641 | 63.386 | 0.00 | 0.00 |
| ATOM | 19087 | 2HG2 | THR | 1279 | 89.337 | 42.871 | 62.190 | 0.00 | 0.00 |
| ATOM | 19088 | 3HG2 | THR | 1279 | 88.536 | 43.842 | 63.425 | 0.00 | 0.00 |
| ATOM | 19089 | OG1  | THR | 1279 | 88.270 | 42.033 | 65.083 | 0.00 | 0.00 |
| ATOM | 19090 | HG1  | THR | 1279 | 88.668 | 42.674 | 65.677 | 0.00 | 0.00 |
| ATOM | 19091 | C    | THR | 1279 | 88.362 | 39.450 | 64.157 | 0.00 | 0.00 |
| ATOM | 19092 | O    | THR | 1279 | 87.180 | 39.147 | 64.084 | 0.00 | 0.00 |
| ATOM | 19093 | N    | LEU | 1280 | 89.232 | 38.792 | 64.899 | 0.00 | 0.00 |
| ATOM | 19094 | H    | LEU | 1280 | 90.137 | 39.241 | 64.909 | 0.00 | 0.00 |
| ATOM | 19095 | CA   | LEU | 1280 | 88.853 | 37.724 | 65.891 | 0.00 | 0.00 |
| ATOM | 19096 | HA   | LEU | 1280 | 88.402 | 36.877 | 65.375 | 0.00 | 0.00 |
| ATOM | 19097 | CB   | LEU | 1280 | 90.168 | 37.234 | 66.421 | 0.00 | 0.00 |
| ATOM | 19098 | HB2  | LEU | 1280 | 90.888 | 37.093 | 65.614 | 0.00 | 0.00 |
| ATOM | 19099 | HB3  | LEU | 1280 | 90.536 | 37.950 | 67.156 | 0.00 | 0.00 |
| ATOM | 19100 | CG   | LEU | 1280 | 90.055 | 35.891 | 67.136 | 0.00 | 0.00 |
| ATOM | 19101 | HG   | LEU | 1280 | 89.547 | 36.026 | 68.091 | 0.00 | 0.00 |
| ATOM | 19102 | CD1  | LEU | 1280 | 89.254 | 34.778 | 66.457 | 0.00 | 0.00 |
| ATOM | 19103 | 1HD1 | LEU | 1280 | 89.390 | 34.945 | 65.388 | 0.00 | 0.00 |
| ATOM | 19104 | 2HD1 | LEU | 1280 | 89.448 | 33.732 | 66.691 | 0.00 | 0.00 |
| ATOM | 19105 | 3HD1 | LEU | 1280 | 88.181 | 34.821 | 66.642 | 0.00 | 0.00 |
| ATOM | 19106 | CD2  | LEU | 1280 | 91.458 | 35.343 | 67.432 | 0.00 | 0.00 |

|      |       |      |     |      |        |        |        |      |      |
|------|-------|------|-----|------|--------|--------|--------|------|------|
| ATOM | 19107 | 1HD2 | LEU | 1280 | 91.936 | 36.044 | 68.117 | 0.00 | 0.00 |
| ATOM | 19108 | 2HD2 | LEU | 1280 | 91.358 | 34.362 | 67.897 | 0.00 | 0.00 |
| ATOM | 19109 | 3HD2 | LEU | 1280 | 92.059 | 35.170 | 66.539 | 0.00 | 0.00 |
| ATOM | 19110 | C    | LEU | 1280 | 87.889 | 38.215 | 66.965 | 0.00 | 0.00 |
| ATOM | 19111 | O    | LEU | 1280 | 87.257 | 37.297 | 67.508 | 0.00 | 0.00 |
| ATOM | 19112 | N    | ASN | 1281 | 87.695 | 39.573 | 67.136 | 0.00 | 0.00 |
| ATOM | 19113 | H    | ASN | 1281 | 88.315 | 40.225 | 66.677 | 0.00 | 0.00 |
| ATOM | 19114 | CA   | ASN | 1281 | 86.544 | 40.088 | 67.956 | 0.00 | 0.00 |
| ATOM | 19115 | HA   | ASN | 1281 | 86.276 | 39.253 | 68.603 | 0.00 | 0.00 |
| ATOM | 19116 | CB   | ASN | 1281 | 87.110 | 41.322 | 68.839 | 0.00 | 0.00 |
| ATOM | 19117 | HB2  | ASN | 1281 | 87.635 | 42.068 | 68.243 | 0.00 | 0.00 |
| ATOM | 19118 | HB3  | ASN | 1281 | 86.272 | 41.887 | 69.247 | 0.00 | 0.00 |
| ATOM | 19119 | CG   | ASN | 1281 | 88.039 | 40.904 | 69.931 | 0.00 | 0.00 |
| ATOM | 19120 | OD1  | ASN | 1281 | 87.603 | 40.917 | 71.073 | 0.00 | 0.00 |
| ATOM | 19121 | ND2  | ASN | 1281 | 89.214 | 40.430 | 69.713 | 0.00 | 0.00 |
| ATOM | 19122 | 1HD2 | ASN | 1281 | 89.758 | 40.151 | 70.517 | 0.00 | 0.00 |
| ATOM | 19123 | 2HD2 | ASN | 1281 | 89.667 | 40.599 | 68.826 | 0.00 | 0.00 |
| ATOM | 19124 | C    | ASN | 1281 | 85.272 | 40.540 | 67.140 | 0.00 | 0.00 |
| ATOM | 19125 | O    | ASN | 1281 | 84.280 | 40.675 | 67.789 | 0.00 | 0.00 |
| ATOM | 19126 | N    | THR | 1282 | 85.331 | 40.623 | 65.777 | 0.00 | 0.00 |
| ATOM | 19127 | H    | THR | 1282 | 86.213 | 40.408 | 65.334 | 0.00 | 0.00 |
| ATOM | 19128 | CA   | THR | 1282 | 84.171 | 40.707 | 64.875 | 0.00 | 0.00 |
| ATOM | 19129 | HA   | THR | 1282 | 83.557 | 41.591 | 65.048 | 0.00 | 0.00 |
| ATOM | 19130 | CB   | THR | 1282 | 84.669 | 40.867 | 63.446 | 0.00 | 0.00 |
| ATOM | 19131 | HB   | THR | 1282 | 85.451 | 40.147 | 63.205 | 0.00 | 0.00 |
| ATOM | 19132 | CG2  | THR | 1282 | 83.587 | 40.684 | 62.338 | 0.00 | 0.00 |

|      |       |      |     |      |        |        |        |      |      |
|------|-------|------|-----|------|--------|--------|--------|------|------|
| ATOM | 19133 | 1HG2 | THR | 1282 | 84.077 | 40.816 | 61.374 | 0.00 | 0.00 |
| ATOM | 19134 | 2HG2 | THR | 1282 | 83.192 | 39.671 | 62.416 | 0.00 | 0.00 |
| ATOM | 19135 | 3HG2 | THR | 1282 | 82.753 | 41.370 | 62.483 | 0.00 | 0.00 |
| ATOM | 19136 | OG1  | THR | 1282 | 85.302 | 42.112 | 63.272 | 0.00 | 0.00 |
| ATOM | 19137 | HG1  | THR | 1282 | 84.701 | 42.657 | 62.758 | 0.00 | 0.00 |
| ATOM | 19138 | C    | THR | 1282 | 83.340 | 39.435 | 64.973 | 0.00 | 0.00 |
| ATOM | 19139 | O    | THR | 1282 | 82.125 | 39.636 | 65.064 | 0.00 | 0.00 |
| ATOM | 19140 | N    | ILE | 1283 | 83.871 | 38.224 | 65.050 | 0.00 | 0.00 |
| ATOM | 19141 | H    | ILE | 1283 | 84.874 | 38.124 | 64.975 | 0.00 | 0.00 |
| ATOM | 19142 | CA   | ILE | 1283 | 83.179 | 36.982 | 65.114 | 0.00 | 0.00 |
| ATOM | 19143 | HA   | ILE | 1283 | 82.335 | 37.088 | 64.433 | 0.00 | 0.00 |
| ATOM | 19144 | CB   | ILE | 1283 | 84.144 | 35.912 | 64.550 | 0.00 | 0.00 |
| ATOM | 19145 | HB   | ILE | 1283 | 84.448 | 36.317 | 63.585 | 0.00 | 0.00 |
| ATOM | 19146 | CG2  | ILE | 1283 | 85.364 | 35.705 | 65.451 | 0.00 | 0.00 |
| ATOM | 19147 | 1HG2 | ILE | 1283 | 86.044 | 34.930 | 65.099 | 0.00 | 0.00 |
| ATOM | 19148 | 2HG2 | ILE | 1283 | 85.983 | 36.592 | 65.587 | 0.00 | 0.00 |
| ATOM | 19149 | 3HG2 | ILE | 1283 | 85.119 | 35.518 | 66.496 | 0.00 | 0.00 |
| ATOM | 19150 | CG1  | ILE | 1283 | 83.469 | 34.548 | 64.264 | 0.00 | 0.00 |
| ATOM | 19151 | 2HG1 | ILE | 1283 | 84.186 | 33.882 | 63.784 | 0.00 | 0.00 |
| ATOM | 19152 | 3HG1 | ILE | 1283 | 83.204 | 33.989 | 65.161 | 0.00 | 0.00 |
| ATOM | 19153 | CD1  | ILE | 1283 | 82.188 | 34.507 | 63.367 | 0.00 | 0.00 |
| ATOM | 19154 | 1HD1 | ILE | 1283 | 81.837 | 33.487 | 63.208 | 0.00 | 0.00 |
| ATOM | 19155 | 2HD1 | ILE | 1283 | 81.361 | 35.027 | 63.852 | 0.00 | 0.00 |
| ATOM | 19156 | 3HD1 | ILE | 1283 | 82.498 | 34.893 | 62.396 | 0.00 | 0.00 |
| ATOM | 19157 | C    | ILE | 1283 | 82.610 | 36.612 | 66.449 | 0.00 | 0.00 |
| ATOM | 19158 | O    | ILE | 1283 | 81.846 | 35.654 | 66.540 | 0.00 | 0.00 |

|      |       |     |     |      |        |        |        |      |      |
|------|-------|-----|-----|------|--------|--------|--------|------|------|
| ATOM | 19159 | N   | ASP | 1284 | 82.917 | 37.406 | 67.483 | 0.00 | 0.00 |
| ATOM | 19160 | H   | ASP | 1284 | 83.584 | 38.144 | 67.307 | 0.00 | 0.00 |
| ATOM | 19161 | CA  | ASP | 1284 | 82.082 | 37.478 | 68.692 | 0.00 | 0.00 |
| ATOM | 19162 | HA  | ASP | 1284 | 81.516 | 36.551 | 68.782 | 0.00 | 0.00 |
| ATOM | 19163 | CB  | ASP | 1284 | 82.863 | 37.606 | 70.032 | 0.00 | 0.00 |
| ATOM | 19164 | HB2 | ASP | 1284 | 83.572 | 38.433 | 69.996 | 0.00 | 0.00 |
| ATOM | 19165 | HB3 | ASP | 1284 | 82.188 | 37.931 | 70.823 | 0.00 | 0.00 |
| ATOM | 19166 | CG  | ASP | 1284 | 83.602 | 36.335 | 70.457 | 0.00 | 0.00 |
| ATOM | 19167 | OD1 | ASP | 1284 | 82.941 | 35.281 | 70.694 | 0.00 | 0.00 |
| ATOM | 19168 | OD2 | ASP | 1284 | 84.882 | 36.410 | 70.652 | 0.00 | 0.00 |
| ATOM | 19169 | C   | ASP | 1284 | 80.995 | 38.503 | 68.696 | 0.00 | 0.00 |
| ATOM | 19170 | O   | ASP | 1284 | 79.808 | 38.166 | 68.878 | 0.00 | 0.00 |
| ATOM | 19171 | N   | GLU | 1285 | 81.304 | 39.768 | 68.512 | 0.00 | 0.00 |
| ATOM | 19172 | H   | GLU | 1285 | 82.210 | 40.078 | 68.191 | 0.00 | 0.00 |
| ATOM | 19173 | CA  | GLU | 1285 | 80.302 | 40.841 | 68.778 | 0.00 | 0.00 |
| ATOM | 19174 | HA  | GLU | 1285 | 79.923 | 40.801 | 69.799 | 0.00 | 0.00 |
| ATOM | 19175 | CB  | GLU | 1285 | 80.860 | 42.264 | 68.517 | 0.00 | 0.00 |
| ATOM | 19176 | HB2 | GLU | 1285 | 80.032 | 42.972 | 68.560 | 0.00 | 0.00 |
| ATOM | 19177 | HB3 | GLU | 1285 | 81.598 | 42.520 | 69.278 | 0.00 | 0.00 |
| ATOM | 19178 | CG  | GLU | 1285 | 81.497 | 42.496 | 67.110 | 0.00 | 0.00 |
| ATOM | 19179 | HG2 | GLU | 1285 | 82.297 | 41.761 | 67.017 | 0.00 | 0.00 |
| ATOM | 19180 | HG3 | GLU | 1285 | 80.804 | 42.271 | 66.300 | 0.00 | 0.00 |
| ATOM | 19181 | CD  | GLU | 1285 | 82.239 | 43.781 | 66.911 | 0.00 | 0.00 |
| ATOM | 19182 | OE1 | GLU | 1285 | 81.910 | 44.720 | 67.683 | 0.00 | 0.00 |
| ATOM | 19183 | OE2 | GLU | 1285 | 83.114 | 43.916 | 65.991 | 0.00 | 0.00 |
| ATOM | 19184 | C   | GLU | 1285 | 79.055 | 40.711 | 67.918 | 0.00 | 0.00 |

|      |       |     |     |      |        |        |        |      |      |
|------|-------|-----|-----|------|--------|--------|--------|------|------|
| ATOM | 19185 | O   | GLU | 1285 | 77.954 | 41.198 | 68.165 | 0.00 | 0.00 |
| ATOM | 19186 | N   | HID | 1286 | 79.349 | 40.286 | 66.655 | 0.00 | 0.00 |
| ATOM | 19187 | H   | HID | 1286 | 80.303 | 40.071 | 66.406 | 0.00 | 0.00 |
| ATOM | 19188 | CA  | HID | 1286 | 78.385 | 40.226 | 65.513 | 0.00 | 0.00 |
| ATOM | 19189 | HA  | HID | 1286 | 77.921 | 41.212 | 65.512 | 0.00 | 0.00 |
| ATOM | 19190 | CB  | HID | 1286 | 79.136 | 39.948 | 64.164 | 0.00 | 0.00 |
| ATOM | 19191 | HB2 | HID | 1286 | 80.047 | 40.540 | 64.253 | 0.00 | 0.00 |
| ATOM | 19192 | HB3 | HID | 1286 | 79.473 | 38.917 | 64.059 | 0.00 | 0.00 |
| ATOM | 19193 | CG  | HID | 1286 | 78.377 | 40.416 | 62.921 | 0.00 | 0.00 |
| ATOM | 19194 | ND1 | HID | 1286 | 77.063 | 40.708 | 62.730 | 0.00 | 0.00 |
| ATOM | 19195 | HD1 | HID | 1286 | 76.345 | 40.708 | 63.440 | 0.00 | 0.00 |
| ATOM | 19196 | CE1 | HID | 1286 | 76.849 | 40.873 | 61.421 | 0.00 | 0.00 |
| ATOM | 19197 | HE1 | HID | 1286 | 75.933 | 41.000 | 60.863 | 0.00 | 0.00 |
| ATOM | 19198 | NE2 | HID | 1286 | 77.992 | 40.720 | 60.713 | 0.00 | 0.00 |
| ATOM | 19199 | CD2 | HID | 1286 | 78.992 | 40.411 | 61.690 | 0.00 | 0.00 |
| ATOM | 19200 | HD2 | HID | 1286 | 80.007 | 40.071 | 61.544 | 0.00 | 0.00 |
| ATOM | 19201 | C   | HID | 1286 | 77.355 | 39.138 | 65.694 | 0.00 | 0.00 |
| ATOM | 19202 | O   | HID | 1286 | 76.300 | 39.344 | 65.120 | 0.00 | 0.00 |
| ATOM | 19203 | N   | LEU | 1287 | 77.769 | 38.066 | 66.353 | 0.00 | 0.00 |
| ATOM | 19204 | H   | LEU | 1287 | 78.702 | 38.078 | 66.740 | 0.00 | 0.00 |
| ATOM | 19205 | CA  | LEU | 1287 | 76.885 | 36.983 | 66.796 | 0.00 | 0.00 |
| ATOM | 19206 | HA  | LEU | 1287 | 76.130 | 36.756 | 66.043 | 0.00 | 0.00 |
| ATOM | 19207 | CB  | LEU | 1287 | 77.751 | 35.732 | 66.997 | 0.00 | 0.00 |
| ATOM | 19208 | HB2 | LEU | 1287 | 78.446 | 35.636 | 66.163 | 0.00 | 0.00 |
| ATOM | 19209 | HB3 | LEU | 1287 | 78.457 | 36.050 | 67.764 | 0.00 | 0.00 |
| ATOM | 19210 | CG  | LEU | 1287 | 77.049 | 34.402 | 67.203 | 0.00 | 0.00 |

|            |      |     |      |        |        |        |      |      |
|------------|------|-----|------|--------|--------|--------|------|------|
| ATOM 19211 | HG   | LEU | 1287 | 76.291 | 34.542 | 67.974 | 0.00 | 0.00 |
| ATOM 19212 | CD1  | LEU | 1287 | 76.352 | 33.785 | 66.050 | 0.00 | 0.00 |
| ATOM 19213 | 1HD1 | LEU | 1287 | 75.407 | 34.328 | 66.084 | 0.00 | 0.00 |
| ATOM 19214 | 2HD1 | LEU | 1287 | 76.874 | 33.853 | 65.095 | 0.00 | 0.00 |
| ATOM 19215 | 3HD1 | LEU | 1287 | 76.054 | 32.753 | 66.234 | 0.00 | 0.00 |
| ATOM 19216 | CD2  | LEU | 1287 | 77.946 | 33.271 | 67.674 | 0.00 | 0.00 |
| ATOM 19217 | 1HD2 | LEU | 1287 | 78.635 | 33.026 | 66.866 | 0.00 | 0.00 |
| ATOM 19218 | 2HD2 | LEU | 1287 | 78.556 | 33.508 | 68.546 | 0.00 | 0.00 |
| ATOM 19219 | 3HD2 | LEU | 1287 | 77.350 | 32.415 | 67.991 | 0.00 | 0.00 |
| ATOM 19220 | C    | LEU | 1287 | 76.167 | 37.446 | 68.114 | 0.00 | 0.00 |
| ATOM 19221 | O    | LEU | 1287 | 75.130 | 36.952 | 68.447 | 0.00 | 0.00 |
| ATOM 19222 | N    | ASP | 1288 | 76.840 | 38.334 | 68.882 | 0.00 | 0.00 |
| ATOM 19223 | H    | ASP | 1288 | 77.727 | 38.622 | 68.495 | 0.00 | 0.00 |
| ATOM 19224 | CA   | ASP | 1288 | 76.260 | 38.885 | 70.133 | 0.00 | 0.00 |
| ATOM 19225 | HA   | ASP | 1288 | 76.093 | 37.986 | 70.727 | 0.00 | 0.00 |
| ATOM 19226 | CB   | ASP | 1288 | 77.259 | 39.707 | 70.982 | 0.00 | 0.00 |
| ATOM 19227 | HB2  | ASP | 1288 | 78.059 | 39.052 | 71.327 | 0.00 | 0.00 |
| ATOM 19228 | HB3  | ASP | 1288 | 77.553 | 40.602 | 70.434 | 0.00 | 0.00 |
| ATOM 19229 | CG   | ASP | 1288 | 76.609 | 40.193 | 72.309 | 0.00 | 0.00 |
| ATOM 19230 | OD1  | ASP | 1288 | 76.166 | 41.378 | 72.327 | 0.00 | 0.00 |
| ATOM 19231 | OD2  | ASP | 1288 | 76.359 | 39.415 | 73.278 | 0.00 | 0.00 |
| ATOM 19232 | C    | ASP | 1288 | 74.948 | 39.680 | 69.906 | 0.00 | 0.00 |
| ATOM 19233 | O    | ASP | 1288 | 73.927 | 39.279 | 70.465 | 0.00 | 0.00 |
| ATOM 19234 | N    | MET | 1289 | 74.995 | 40.689 | 69.003 | 0.00 | 0.00 |
| ATOM 19235 | H    | MET | 1289 | 75.871 | 40.853 | 68.526 | 0.00 | 0.00 |
| ATOM 19236 | CA   | MET | 1289 | 73.993 | 41.736 | 68.856 | 0.00 | 0.00 |

|            |      |     |      |        |        |        |      |      |
|------------|------|-----|------|--------|--------|--------|------|------|
| ATOM 19237 | HA   | MET | 1289 | 73.848 | 42.261 | 69.800 | 0.00 | 0.00 |
| ATOM 19238 | CB   | MET | 1289 | 74.660 | 42.848 | 67.935 | 0.00 | 0.00 |
| ATOM 19239 | HB2  | MET | 1289 | 73.875 | 43.578 | 67.733 | 0.00 | 0.00 |
| ATOM 19240 | HB3  | MET | 1289 | 75.437 | 43.308 | 68.545 | 0.00 | 0.00 |
| ATOM 19241 | CG   | MET | 1289 | 75.211 | 42.404 | 66.576 | 0.00 | 0.00 |
| ATOM 19242 | HG2  | MET | 1289 | 75.975 | 41.631 | 66.664 | 0.00 | 0.00 |
| ATOM 19243 | HG3  | MET | 1289 | 74.414 | 41.961 | 65.978 | 0.00 | 0.00 |
| ATOM 19244 | SD   | MET | 1289 | 75.869 | 43.641 | 65.413 | 0.00 | 0.00 |
| ATOM 19245 | CE   | MET | 1289 | 77.227 | 44.254 | 66.358 | 0.00 | 0.00 |
| ATOM 19246 | HE1  | MET | 1289 | 77.903 | 44.695 | 65.624 | 0.00 | 0.00 |
| ATOM 19247 | HE2  | MET | 1289 | 76.945 | 44.940 | 67.157 | 0.00 | 0.00 |
| ATOM 19248 | HE3  | MET | 1289 | 77.872 | 43.455 | 66.724 | 0.00 | 0.00 |
| ATOM 19249 | C    | MET | 1289 | 72.686 | 41.164 | 68.327 | 0.00 | 0.00 |
| ATOM 19250 | O    | MET | 1289 | 71.574 | 41.730 | 68.524 | 0.00 | 0.00 |
| ATOM 19251 | N    | LEU | 1290 | 72.696 | 39.958 | 67.758 | 0.00 | 0.00 |
| ATOM 19252 | H    | LEU | 1290 | 73.541 | 39.428 | 67.919 | 0.00 | 0.00 |
| ATOM 19253 | CA   | LEU | 1290 | 71.544 | 39.317 | 67.199 | 0.00 | 0.00 |
| ATOM 19254 | HA   | LEU | 1290 | 71.211 | 39.951 | 66.377 | 0.00 | 0.00 |
| ATOM 19255 | CB   | LEU | 1290 | 71.993 | 37.992 | 66.600 | 0.00 | 0.00 |
| ATOM 19256 | HB2  | LEU | 1290 | 71.080 | 37.646 | 66.115 | 0.00 | 0.00 |
| ATOM 19257 | HB3  | LEU | 1290 | 72.321 | 37.392 | 67.448 | 0.00 | 0.00 |
| ATOM 19258 | CG   | LEU | 1290 | 73.057 | 37.963 | 65.537 | 0.00 | 0.00 |
| ATOM 19259 | HG   | LEU | 1290 | 73.990 | 38.283 | 66.001 | 0.00 | 0.00 |
| ATOM 19260 | CD1  | LEU | 1290 | 73.275 | 36.544 | 65.101 | 0.00 | 0.00 |
| ATOM 19261 | 1HD1 | LEU | 1290 | 74.165 | 36.628 | 64.478 | 0.00 | 0.00 |
| ATOM 19262 | 2HD1 | LEU | 1290 | 73.454 | 35.880 | 65.947 | 0.00 | 0.00 |



|      |       |      |     |      |        |        |        |      |      |
|------|-------|------|-----|------|--------|--------|--------|------|------|
| ATOM | 19263 | 3HD1 | LEU | 1290 | 72.413 | 36.208 | 64.525 | 0.00 | 0.00 |
| ATOM | 19264 | CD2  | LEU | 1290 | 72.844 | 38.841 | 64.316 | 0.00 | 0.00 |
| ATOM | 19265 | 1HD2 | LEU | 1290 | 72.701 | 39.912 | 64.462 | 0.00 | 0.00 |
| ATOM | 19266 | 2HD2 | LEU | 1290 | 73.799 | 38.797 | 63.793 | 0.00 | 0.00 |
| ATOM | 19267 | 3HD2 | LEU | 1290 | 72.011 | 38.455 | 63.728 | 0.00 | 0.00 |
| ATOM | 19268 | C    | LEU | 1290 | 70.388 | 39.124 | 68.187 | 0.00 | 0.00 |
| ATOM | 19269 | O    | LEU | 1290 | 69.239 | 38.901 | 67.796 | 0.00 | 0.00 |
| ATOM | 19270 | N    | MET | 1291 | 70.686 | 39.111 | 69.481 | 0.00 | 0.00 |
| ATOM | 19271 | H    | MET | 1291 | 71.626 | 39.009 | 69.834 | 0.00 | 0.00 |
| ATOM | 19272 | CA   | MET | 1291 | 69.621 | 38.999 | 70.540 | 0.00 | 0.00 |
| ATOM | 19273 | HA   | MET | 1291 | 68.902 | 38.259 | 70.189 | 0.00 | 0.00 |
| ATOM | 19274 | CB   | MET | 1291 | 70.265 | 38.404 | 71.787 | 0.00 | 0.00 |
| ATOM | 19275 | HB2  | MET | 1291 | 71.230 | 38.880 | 71.959 | 0.00 | 0.00 |
| ATOM | 19276 | HB3  | MET | 1291 | 69.611 | 38.625 | 72.630 | 0.00 | 0.00 |
| ATOM | 19277 | CG   | MET | 1291 | 70.486 | 36.896 | 71.682 | 0.00 | 0.00 |
| ATOM | 19278 | HG2  | MET | 1291 | 71.124 | 36.539 | 72.491 | 0.00 | 0.00 |
| ATOM | 19279 | HG3  | MET | 1291 | 69.557 | 36.357 | 71.868 | 0.00 | 0.00 |
| ATOM | 19280 | SD   | MET | 1291 | 71.279 | 36.205 | 70.142 | 0.00 | 0.00 |
| ATOM | 19281 | CE   | MET | 1291 | 69.769 | 35.811 | 69.272 | 0.00 | 0.00 |
| ATOM | 19282 | HE1  | MET | 1291 | 69.353 | 36.746 | 68.898 | 0.00 | 0.00 |
| ATOM | 19283 | HE2  | MET | 1291 | 69.880 | 35.117 | 68.440 | 0.00 | 0.00 |
| ATOM | 19284 | HE3  | MET | 1291 | 69.033 | 35.463 | 69.996 | 0.00 | 0.00 |
| ATOM | 19285 | C    | MET | 1291 | 68.903 | 40.366 | 70.772 | 0.00 | 0.00 |
| ATOM | 19286 | O    | MET | 1291 | 67.805 | 40.283 | 71.340 | 0.00 | 0.00 |
| ATOM | 19287 | N    | VAL | 1292 | 69.471 | 41.499 | 70.316 | 0.00 | 0.00 |
| ATOM | 19288 | H    | VAL | 1292 | 70.359 | 41.449 | 69.837 | 0.00 | 0.00 |

|      |       |      |     |      |        |        |        |      |      |
|------|-------|------|-----|------|--------|--------|--------|------|------|
| ATOM | 19289 | CA   | VAL | 1292 | 68.775 | 42.792 | 70.357 | 0.00 | 0.00 |
| ATOM | 19290 | HA   | VAL | 1292 | 67.984 | 42.651 | 71.093 | 0.00 | 0.00 |
| ATOM | 19291 | CB   | VAL | 1292 | 69.762 | 43.946 | 70.723 | 0.00 | 0.00 |
| ATOM | 19292 | HB   | VAL | 1292 | 70.579 | 43.981 | 70.002 | 0.00 | 0.00 |
| ATOM | 19293 | CG1  | VAL | 1292 | 69.035 | 45.311 | 70.834 | 0.00 | 0.00 |
| ATOM | 19294 | 1HG1 | VAL | 1292 | 68.492 | 45.563 | 69.923 | 0.00 | 0.00 |
| ATOM | 19295 | 2HG1 | VAL | 1292 | 68.233 | 45.242 | 71.569 | 0.00 | 0.00 |
| ATOM | 19296 | 3HG1 | VAL | 1292 | 69.803 | 46.004 | 71.178 | 0.00 | 0.00 |
| ATOM | 19297 | CG2  | VAL | 1292 | 70.468 | 43.746 | 72.061 | 0.00 | 0.00 |
| ATOM | 19298 | 1HG2 | VAL | 1292 | 71.038 | 42.825 | 71.939 | 0.00 | 0.00 |
| ATOM | 19299 | 2HG2 | VAL | 1292 | 71.100 | 44.628 | 72.165 | 0.00 | 0.00 |
| ATOM | 19300 | 3HG2 | VAL | 1292 | 69.909 | 43.585 | 72.983 | 0.00 | 0.00 |
| ATOM | 19301 | C    | VAL | 1292 | 68.207 | 43.051 | 68.926 | 0.00 | 0.00 |
| ATOM | 19302 | O    | VAL | 1292 | 67.016 | 43.365 | 68.838 | 0.00 | 0.00 |
| ATOM | 19303 | N    | CYS | 1293 | 68.997 | 42.917 | 67.837 | 0.00 | 0.00 |
| ATOM | 19304 | H    | CYS | 1293 | 69.941 | 42.560 | 67.874 | 0.00 | 0.00 |
| ATOM | 19305 | CA   | CYS | 1293 | 68.597 | 43.219 | 66.527 | 0.00 | 0.00 |
| ATOM | 19306 | HA   | CYS | 1293 | 68.285 | 44.262 | 66.582 | 0.00 | 0.00 |
| ATOM | 19307 | CB   | CYS | 1293 | 69.769 | 43.028 | 65.518 | 0.00 | 0.00 |
| ATOM | 19308 | HB2  | CYS | 1293 | 70.111 | 41.993 | 65.507 | 0.00 | 0.00 |
| ATOM | 19309 | HB3  | CYS | 1293 | 69.385 | 43.174 | 64.508 | 0.00 | 0.00 |
| ATOM | 19310 | SG   | CYS | 1293 | 71.310 | 44.008 | 65.949 | 0.00 | 0.00 |
| ATOM | 19311 | HG   | CYS | 1293 | 70.756 | 45.211 | 65.775 | 0.00 | 0.00 |
| ATOM | 19312 | C    | CYS | 1293 | 67.334 | 42.402 | 66.031 | 0.00 | 0.00 |
| ATOM | 19313 | O    | CYS | 1293 | 66.689 | 42.828 | 65.021 | 0.00 | 0.00 |
| ATOM | 19314 | N    | HID | 1294 | 66.900 | 41.291 | 66.662 | 0.00 | 0.00 |

|      |       |     |     |      |        |        |        |      |      |
|------|-------|-----|-----|------|--------|--------|--------|------|------|
| ATOM | 19315 | H   | HID | 1294 | 67.497 | 41.029 | 67.433 | 0.00 | 0.00 |
| ATOM | 19316 | CA  | HID | 1294 | 65.730 | 40.467 | 66.388 | 0.00 | 0.00 |
| ATOM | 19317 | HA  | HID | 1294 | 65.024 | 41.006 | 65.755 | 0.00 | 0.00 |
| ATOM | 19318 | CB  | HID | 1294 | 66.207 | 39.167 | 65.690 | 0.00 | 0.00 |
| ATOM | 19319 | HB2 | HID | 1294 | 66.851 | 38.601 | 66.363 | 0.00 | 0.00 |
| ATOM | 19320 | HB3 | HID | 1294 | 65.394 | 38.503 | 65.397 | 0.00 | 0.00 |
| ATOM | 19321 | CG  | HID | 1294 | 66.938 | 39.306 | 64.378 | 0.00 | 0.00 |
| ATOM | 19322 | ND1 | HID | 1294 | 66.542 | 40.018 | 63.217 | 0.00 | 0.00 |
| ATOM | 19323 | HD1 | HID | 1294 | 65.737 | 40.621 | 63.122 | 0.00 | 0.00 |
| ATOM | 19324 | CE1 | HID | 1294 | 67.521 | 40.083 | 62.367 | 0.00 | 0.00 |
| ATOM | 19325 | HE1 | HID | 1294 | 67.516 | 40.580 | 61.408 | 0.00 | 0.00 |
| ATOM | 19326 | NE2 | HID | 1294 | 68.542 | 39.484 | 62.888 | 0.00 | 0.00 |
| ATOM | 19327 | CD2 | HID | 1294 | 68.257 | 38.973 | 64.153 | 0.00 | 0.00 |
| ATOM | 19328 | HD2 | HID | 1294 | 68.913 | 38.377 | 64.769 | 0.00 | 0.00 |
| ATOM | 19329 | C   | HID | 1294 | 64.822 | 40.318 | 67.627 | 0.00 | 0.00 |
| ATOM | 19330 | O   | HID | 1294 | 63.848 | 39.574 | 67.608 | 0.00 | 0.00 |
| ATOM | 19331 | N   | HIE | 1295 | 65.185 | 40.968 | 68.759 | 0.00 | 0.00 |
| ATOM | 19332 | H   | HIE | 1295 | 65.990 | 41.559 | 68.611 | 0.00 | 0.00 |
| ATOM | 19333 | CA  | HIE | 1295 | 64.488 | 40.969 | 70.057 | 0.00 | 0.00 |
| ATOM | 19334 | HA  | HIE | 1295 | 65.194 | 41.236 | 70.844 | 0.00 | 0.00 |
| ATOM | 19335 | CB  | HIE | 1295 | 63.343 | 42.020 | 70.082 | 0.00 | 0.00 |
| ATOM | 19336 | HB2 | HIE | 1295 | 62.555 | 41.871 | 69.345 | 0.00 | 0.00 |
| ATOM | 19337 | HB3 | HIE | 1295 | 62.850 | 42.028 | 71.055 | 0.00 | 0.00 |
| ATOM | 19338 | CG  | HIE | 1295 | 63.925 | 43.404 | 70.086 | 0.00 | 0.00 |
| ATOM | 19339 | ND1 | HIE | 1295 | 64.837 | 43.856 | 71.027 | 0.00 | 0.00 |
| ATOM | 19340 | CE1 | HIE | 1295 | 65.127 | 45.137 | 70.680 | 0.00 | 0.00 |

|      |       |      |     |      |        |        |        |      |      |
|------|-------|------|-----|------|--------|--------|--------|------|------|
| ATOM | 19341 | HE1  | HIE | 1295 | 65.807 | 45.822 | 71.166 | 0.00 | 0.00 |
| ATOM | 19342 | NE2  | HIE | 1295 | 64.358 | 45.437 | 69.610 | 0.00 | 0.00 |
| ATOM | 19343 | HE2  | HIE | 1295 | 64.277 | 46.307 | 69.103 | 0.00 | 0.00 |
| ATOM | 19344 | CD2  | HIE | 1295 | 63.685 | 44.375 | 69.167 | 0.00 | 0.00 |
| ATOM | 19345 | HD2  | HIE | 1295 | 63.029 | 44.321 | 68.311 | 0.00 | 0.00 |
| ATOM | 19346 | C    | HIE | 1295 | 64.110 | 39.588 | 70.486 | 0.00 | 0.00 |
| ATOM | 19347 | O    | HIE | 1295 | 62.958 | 39.178 | 70.510 | 0.00 | 0.00 |
| ATOM | 19348 | N    | LEU | 1296 | 65.104 | 38.758 | 70.858 | 0.00 | 0.00 |
| ATOM | 19349 | H    | LEU | 1296 | 66.064 | 39.070 | 70.853 | 0.00 | 0.00 |
| ATOM | 19350 | CA   | LEU | 1296 | 65.079 | 37.353 | 71.249 | 0.00 | 0.00 |
| ATOM | 19351 | HA   | LEU | 1296 | 64.065 | 36.987 | 71.087 | 0.00 | 0.00 |
| ATOM | 19352 | CB   | LEU | 1296 | 65.885 | 36.556 | 70.213 | 0.00 | 0.00 |
| ATOM | 19353 | HB2  | LEU | 1296 | 66.929 | 36.871 | 70.226 | 0.00 | 0.00 |
| ATOM | 19354 | HB3  | LEU | 1296 | 65.816 | 35.557 | 70.644 | 0.00 | 0.00 |
| ATOM | 19355 | CG   | LEU | 1296 | 65.384 | 36.691 | 68.728 | 0.00 | 0.00 |
| ATOM | 19356 | HG   | LEU | 1296 | 65.362 | 37.749 | 68.469 | 0.00 | 0.00 |
| ATOM | 19357 | CD1  | LEU | 1296 | 66.344 | 36.015 | 67.741 | 0.00 | 0.00 |
| ATOM | 19358 | 1HD1 | LEU | 1296 | 67.355 | 36.341 | 67.985 | 0.00 | 0.00 |
| ATOM | 19359 | 2HD1 | LEU | 1296 | 66.293 | 34.933 | 67.870 | 0.00 | 0.00 |
| ATOM | 19360 | 3HD1 | LEU | 1296 | 66.058 | 36.224 | 66.711 | 0.00 | 0.00 |
| ATOM | 19361 | CD2  | LEU | 1296 | 64.032 | 36.063 | 68.635 | 0.00 | 0.00 |
| ATOM | 19362 | 1HD2 | LEU | 1296 | 63.667 | 36.031 | 67.608 | 0.00 | 0.00 |
| ATOM | 19363 | 2HD2 | LEU | 1296 | 64.168 | 35.011 | 68.882 | 0.00 | 0.00 |
| ATOM | 19364 | 3HD2 | LEU | 1296 | 63.229 | 36.471 | 69.249 | 0.00 | 0.00 |
| ATOM | 19365 | C    | LEU | 1296 | 65.488 | 36.943 | 72.725 | 0.00 | 0.00 |
| ATOM | 19366 | O    | LEU | 1296 | 66.345 | 37.631 | 73.345 | 0.00 | 0.00 |

|      |       |     |     |      |        |        |        |      |      |
|------|-------|-----|-----|------|--------|--------|--------|------|------|
| ATOM | 19367 | N   | ASP | 1297 | 64.976 | 35.780 | 73.207 | 0.00 | 0.00 |
| ATOM | 19368 | H   | ASP | 1297 | 64.233 | 35.299 | 72.720 | 0.00 | 0.00 |
| ATOM | 19369 | CA  | ASP | 1297 | 65.345 | 35.145 | 74.464 | 0.00 | 0.00 |
| ATOM | 19370 | HA  | ASP | 1297 | 66.375 | 35.470 | 74.614 | 0.00 | 0.00 |
| ATOM | 19371 | CB  | ASP | 1297 | 64.447 | 35.554 | 75.709 | 0.00 | 0.00 |
| ATOM | 19372 | HB2 | ASP | 1297 | 63.386 | 35.322 | 75.621 | 0.00 | 0.00 |
| ATOM | 19373 | HB3 | ASP | 1297 | 64.371 | 36.641 | 75.731 | 0.00 | 0.00 |
| ATOM | 19374 | CG  | ASP | 1297 | 64.901 | 35.189 | 77.121 | 0.00 | 0.00 |
| ATOM | 19375 | OD1 | ASP | 1297 | 65.978 | 35.657 | 77.460 | 0.00 | 0.00 |
| ATOM | 19376 | OD2 | ASP | 1297 | 64.258 | 34.371 | 77.752 | 0.00 | 0.00 |
| ATOM | 19377 | C   | ASP | 1297 | 65.390 | 33.565 | 74.323 | 0.00 | 0.00 |
| ATOM | 19378 | O   | ASP | 1297 | 64.641 | 33.059 | 73.493 | 0.00 | 0.00 |
| ATOM | 19379 | N   | PRO | 1298 | 66.130 | 32.796 | 75.082 | 0.00 | 0.00 |
| ATOM | 19380 | CD  | PRO | 1298 | 67.360 | 33.274 | 75.704 | 0.00 | 0.00 |
| ATOM | 19381 | HD2 | PRO | 1298 | 67.866 | 33.999 | 75.067 | 0.00 | 0.00 |
| ATOM | 19382 | HD3 | PRO | 1298 | 67.301 | 33.731 | 76.692 | 0.00 | 0.00 |
| ATOM | 19383 | CG  | PRO | 1298 | 68.311 | 32.089 | 75.759 | 0.00 | 0.00 |
| ATOM | 19384 | HG2 | PRO | 1298 | 68.951 | 32.094 | 74.877 | 0.00 | 0.00 |
| ATOM | 19385 | HG3 | PRO | 1298 | 68.986 | 32.193 | 76.609 | 0.00 | 0.00 |
| ATOM | 19386 | CB  | PRO | 1298 | 67.419 | 30.824 | 75.657 | 0.00 | 0.00 |
| ATOM | 19387 | HB2 | PRO | 1298 | 67.879 | 30.089 | 74.997 | 0.00 | 0.00 |
| ATOM | 19388 | HB3 | PRO | 1298 | 67.373 | 30.318 | 76.621 | 0.00 | 0.00 |
| ATOM | 19389 | CA  | PRO | 1298 | 66.075 | 31.368 | 75.098 | 0.00 | 0.00 |
| ATOM | 19390 | HA  | PRO | 1298 | 66.054 | 31.103 | 74.041 | 0.00 | 0.00 |
| ATOM | 19391 | C   | PRO | 1298 | 64.872 | 30.789 | 75.880 | 0.00 | 0.00 |
| ATOM | 19392 | O   | PRO | 1298 | 64.799 | 29.554 | 75.981 | 0.00 | 0.00 |

|      |       |      |     |      |        |        |        |      |      |
|------|-------|------|-----|------|--------|--------|--------|------|------|
| ATOM | 19393 | N    | ASP | 1299 | 63.885 | 31.573 | 76.248 | 0.00 | 0.00 |
| ATOM | 19394 | H    | ASP | 1299 | 64.070 | 32.557 | 76.386 | 0.00 | 0.00 |
| ATOM | 19395 | CA   | ASP | 1299 | 62.524 | 31.035 | 76.289 | 0.00 | 0.00 |
| ATOM | 19396 | HA   | ASP | 1299 | 62.459 | 30.114 | 76.868 | 0.00 | 0.00 |
| ATOM | 19397 | CB   | ASP | 1299 | 61.516 | 31.961 | 77.038 | 0.00 | 0.00 |
| ATOM | 19398 | HB2  | ASP | 1299 | 61.942 | 32.127 | 78.027 | 0.00 | 0.00 |
| ATOM | 19399 | HB3  | ASP | 1299 | 61.410 | 32.939 | 76.570 | 0.00 | 0.00 |
| ATOM | 19400 | CG   | ASP | 1299 | 60.092 | 31.374 | 77.134 | 0.00 | 0.00 |
| ATOM | 19401 | OD1  | ASP | 1299 | 59.952 | 30.382 | 77.898 | 0.00 | 0.00 |
| ATOM | 19402 | OD2  | ASP | 1299 | 59.152 | 31.819 | 76.364 | 0.00 | 0.00 |
| ATOM | 19403 | C    | ASP | 1299 | 61.999 | 30.670 | 74.918 | 0.00 | 0.00 |
| ATOM | 19404 | O    | ASP | 1299 | 61.289 | 29.658 | 74.735 | 0.00 | 0.00 |
| ATOM | 19405 | N    | ILE | 1300 | 62.348 | 31.449 | 73.830 | 0.00 | 0.00 |
| ATOM | 19406 | H    | ILE | 1300 | 63.041 | 32.163 | 74.004 | 0.00 | 0.00 |
| ATOM | 19407 | CA   | ILE | 1300 | 62.117 | 31.090 | 72.410 | 0.00 | 0.00 |
| ATOM | 19408 | HA   | ILE | 1300 | 61.316 | 30.350 | 72.436 | 0.00 | 0.00 |
| ATOM | 19409 | CB   | ILE | 1300 | 61.406 | 32.214 | 71.608 | 0.00 | 0.00 |
| ATOM | 19410 | HB   | ILE | 1300 | 61.435 | 31.913 | 70.561 | 0.00 | 0.00 |
| ATOM | 19411 | CG2  | ILE | 1300 | 59.986 | 32.371 | 72.079 | 0.00 | 0.00 |
| ATOM | 19412 | 1HG2 | ILE | 1300 | 59.500 | 31.398 | 72.151 | 0.00 | 0.00 |
| ATOM | 19413 | 2HG2 | ILE | 1300 | 60.038 | 32.827 | 73.067 | 0.00 | 0.00 |
| ATOM | 19414 | 3HG2 | ILE | 1300 | 59.471 | 33.097 | 71.450 | 0.00 | 0.00 |
| ATOM | 19415 | CG1  | ILE | 1300 | 62.155 | 33.541 | 71.785 | 0.00 | 0.00 |
| ATOM | 19416 | 2HG1 | ILE | 1300 | 62.299 | 33.801 | 72.834 | 0.00 | 0.00 |
| ATOM | 19417 | 3HG1 | ILE | 1300 | 63.149 | 33.599 | 71.343 | 0.00 | 0.00 |
| ATOM | 19418 | CD1  | ILE | 1300 | 61.402 | 34.664 | 71.116 | 0.00 | 0.00 |

|      |       |      |     |      |        |        |        |      |      |
|------|-------|------|-----|------|--------|--------|--------|------|------|
| ATOM | 19419 | 1HD1 | ILE | 1300 | 60.434 | 34.866 | 71.576 | 0.00 | 0.00 |
| ATOM | 19420 | 2HD1 | ILE | 1300 | 61.900 | 35.629 | 71.211 | 0.00 | 0.00 |
| ATOM | 19421 | 3HD1 | ILE | 1300 | 61.224 | 34.463 | 70.059 | 0.00 | 0.00 |
| ATOM | 19422 | C    | ILE | 1300 | 63.348 | 30.454 | 71.699 | 0.00 | 0.00 |
| ATOM | 19423 | O    | ILE | 1300 | 63.839 | 30.925 | 70.689 | 0.00 | 0.00 |
| ATOM | 19424 | N    | ALA | 1301 | 64.113 | 29.497 | 72.300 | 0.00 | 0.00 |
| ATOM | 19425 | H    | ALA | 1301 | 63.856 | 29.054 | 73.171 | 0.00 | 0.00 |
| ATOM | 19426 | CA   | ALA | 1301 | 65.476 | 29.085 | 71.972 | 0.00 | 0.00 |
| ATOM | 19427 | HA   | ALA | 1301 | 66.051 | 30.004 | 72.088 | 0.00 | 0.00 |
| ATOM | 19428 | CB   | ALA | 1301 | 65.766 | 27.916 | 72.945 | 0.00 | 0.00 |
| ATOM | 19429 | HB1  | ALA | 1301 | 65.938 | 28.213 | 73.980 | 0.00 | 0.00 |
| ATOM | 19430 | HB2  | ALA | 1301 | 64.920 | 27.230 | 72.896 | 0.00 | 0.00 |
| ATOM | 19431 | HB3  | ALA | 1301 | 66.646 | 27.339 | 72.659 | 0.00 | 0.00 |
| ATOM | 19432 | C    | ALA | 1301 | 65.722 | 28.540 | 70.533 | 0.00 | 0.00 |
| ATOM | 19433 | O    | ALA | 1301 | 66.848 | 28.667 | 69.978 | 0.00 | 0.00 |
| ATOM | 19434 | N    | GLU | 1302 | 64.687 | 28.058 | 69.844 | 0.00 | 0.00 |
| ATOM | 19435 | H    | GLU | 1302 | 63.762 | 28.155 | 70.236 | 0.00 | 0.00 |
| ATOM | 19436 | CA   | GLU | 1302 | 64.788 | 27.600 | 68.455 | 0.00 | 0.00 |
| ATOM | 19437 | HA   | GLU | 1302 | 65.665 | 26.972 | 68.304 | 0.00 | 0.00 |
| ATOM | 19438 | CB   | GLU | 1302 | 63.623 | 26.690 | 68.137 | 0.00 | 0.00 |
| ATOM | 19439 | HB2  | GLU | 1302 | 63.385 | 26.072 | 69.003 | 0.00 | 0.00 |
| ATOM | 19440 | HB3  | GLU | 1302 | 62.683 | 27.197 | 67.919 | 0.00 | 0.00 |
| ATOM | 19441 | CG   | GLU | 1302 | 63.865 | 25.863 | 66.850 | 0.00 | 0.00 |
| ATOM | 19442 | HG2  | GLU | 1302 | 64.278 | 26.471 | 66.044 | 0.00 | 0.00 |
| ATOM | 19443 | HG3  | GLU | 1302 | 64.573 | 25.066 | 67.076 | 0.00 | 0.00 |
| ATOM | 19444 | CD   | GLU | 1302 | 62.588 | 25.230 | 66.286 | 0.00 | 0.00 |

|      |       |      |     |      |        |        |        |      |      |
|------|-------|------|-----|------|--------|--------|--------|------|------|
| ATOM | 19445 | OE1  | GLU | 1302 | 61.911 | 25.925 | 65.478 | 0.00 | 0.00 |
| ATOM | 19446 | OE2  | GLU | 1302 | 62.174 | 24.096 | 66.597 | 0.00 | 0.00 |
| ATOM | 19447 | C    | GLU | 1302 | 64.968 | 28.817 | 67.524 | 0.00 | 0.00 |
| ATOM | 19448 | O    | GLU | 1302 | 65.680 | 28.740 | 66.503 | 0.00 | 0.00 |
| ATOM | 19449 | N    | ASP | 1303 | 64.520 | 29.975 | 67.946 | 0.00 | 0.00 |
| ATOM | 19450 | H    | ASP | 1303 | 63.928 | 29.903 | 68.762 | 0.00 | 0.00 |
| ATOM | 19451 | CA   | ASP | 1303 | 64.622 | 31.305 | 67.260 | 0.00 | 0.00 |
| ATOM | 19452 | HA   | ASP | 1303 | 64.453 | 31.022 | 66.221 | 0.00 | 0.00 |
| ATOM | 19453 | CB   | ASP | 1303 | 63.398 | 32.194 | 67.586 | 0.00 | 0.00 |
| ATOM | 19454 | HB2  | ASP | 1303 | 63.405 | 32.274 | 68.673 | 0.00 | 0.00 |
| ATOM | 19455 | HB3  | ASP | 1303 | 63.487 | 33.136 | 67.044 | 0.00 | 0.00 |
| ATOM | 19456 | CG   | ASP | 1303 | 62.021 | 31.719 | 67.085 | 0.00 | 0.00 |
| ATOM | 19457 | OD1  | ASP | 1303 | 61.561 | 32.262 | 66.077 | 0.00 | 0.00 |
| ATOM | 19458 | OD2  | ASP | 1303 | 61.390 | 30.836 | 67.680 | 0.00 | 0.00 |
| ATOM | 19459 | C    | ASP | 1303 | 66.009 | 31.932 | 67.501 | 0.00 | 0.00 |
| ATOM | 19460 | O    | ASP | 1303 | 66.630 | 32.375 | 66.529 | 0.00 | 0.00 |
| ATOM | 19461 | N    | VAL | 1304 | 66.535 | 31.740 | 68.702 | 0.00 | 0.00 |
| ATOM | 19462 | H    | VAL | 1304 | 66.007 | 31.151 | 69.330 | 0.00 | 0.00 |
| ATOM | 19463 | CA   | VAL | 1304 | 67.896 | 32.202 | 69.024 | 0.00 | 0.00 |
| ATOM | 19464 | HA   | VAL | 1304 | 67.933 | 33.277 | 68.845 | 0.00 | 0.00 |
| ATOM | 19465 | CB   | VAL | 1304 | 68.256 | 31.840 | 70.485 | 0.00 | 0.00 |
| ATOM | 19466 | HB   | VAL | 1304 | 68.337 | 30.756 | 70.575 | 0.00 | 0.00 |
| ATOM | 19467 | CG1  | VAL | 1304 | 69.654 | 32.499 | 70.884 | 0.00 | 0.00 |
| ATOM | 19468 | 1HG1 | VAL | 1304 | 69.966 | 32.103 | 71.851 | 0.00 | 0.00 |
| ATOM | 19469 | 2HG1 | VAL | 1304 | 70.380 | 32.184 | 70.135 | 0.00 | 0.00 |
| ATOM | 19470 | 3HG1 | VAL | 1304 | 69.528 | 33.578 | 70.970 | 0.00 | 0.00 |



|      |       |          |      |        |        |        |      |      |
|------|-------|----------|------|--------|--------|--------|------|------|
| ATOM | 19471 | CG2 VAL  | 1304 | 67.276 | 32.499 | 71.476 | 0.00 | 0.00 |
| ATOM | 19472 | 1HG2 VAL | 1304 | 67.539 | 32.193 | 72.489 | 0.00 | 0.00 |
| ATOM | 19473 | 2HG2 VAL | 1304 | 67.307 | 33.588 | 71.450 | 0.00 | 0.00 |
| ATOM | 19474 | 3HG2 VAL | 1304 | 66.288 | 32.130 | 71.201 | 0.00 | 0.00 |
| ATOM | 19475 | C VAL    | 1304 | 68.881 | 31.386 | 68.168 | 0.00 | 0.00 |
| ATOM | 19476 | O VAL    | 1304 | 69.609 | 32.134 | 67.484 | 0.00 | 0.00 |
| ATOM | 19477 | N ALA    | 1305 | 68.725 | 30.097 | 68.025 | 0.00 | 0.00 |
| ATOM | 19478 | H ALA    | 1305 | 67.931 | 29.633 | 68.443 | 0.00 | 0.00 |
| ATOM | 19479 | CA ALA   | 1305 | 69.602 | 29.256 | 67.220 | 0.00 | 0.00 |
| ATOM | 19480 | HA ALA   | 1305 | 70.661 | 29.347 | 67.462 | 0.00 | 0.00 |
| ATOM | 19481 | CB ALA   | 1305 | 69.419 | 27.829 | 67.647 | 0.00 | 0.00 |
| ATOM | 19482 | HB1 ALA  | 1305 | 69.214 | 27.730 | 68.713 | 0.00 | 0.00 |
| ATOM | 19483 | HB2 ALA  | 1305 | 68.492 | 27.458 | 67.209 | 0.00 | 0.00 |
| ATOM | 19484 | HB3 ALA  | 1305 | 70.203 | 27.117 | 67.391 | 0.00 | 0.00 |
| ATOM | 19485 | C ALA    | 1305 | 69.489 | 29.453 | 65.682 | 0.00 | 0.00 |
| ATOM | 19486 | O ALA    | 1305 | 70.430 | 29.290 | 64.907 | 0.00 | 0.00 |
| ATOM | 19487 | N PHE    | 1306 | 68.297 | 29.947 | 65.239 | 0.00 | 0.00 |
| ATOM | 19488 | H PHE    | 1306 | 67.496 | 29.882 | 65.851 | 0.00 | 0.00 |
| ATOM | 19489 | CA PHE   | 1306 | 68.046 | 30.201 | 63.790 | 0.00 | 0.00 |
| ATOM | 19490 | HA PHE   | 1306 | 68.494 | 29.414 | 63.183 | 0.00 | 0.00 |
| ATOM | 19491 | CB PHE   | 1306 | 66.501 | 30.164 | 63.490 | 0.00 | 0.00 |
| ATOM | 19492 | HB2 PHE  | 1306 | 66.057 | 29.207 | 63.764 | 0.00 | 0.00 |
| ATOM | 19493 | HB3 PHE  | 1306 | 66.023 | 30.927 | 64.105 | 0.00 | 0.00 |
| ATOM | 19494 | CG PHE   | 1306 | 66.149 | 30.420 | 62.050 | 0.00 | 0.00 |
| ATOM | 19495 | CD1 PHE  | 1306 | 65.284 | 31.466 | 61.748 | 0.00 | 0.00 |
| ATOM | 19496 | HD1 PHE  | 1306 | 64.757 | 31.973 | 62.543 | 0.00 | 0.00 |

|      |       |     |     |      |        |        |        |      |      |
|------|-------|-----|-----|------|--------|--------|--------|------|------|
| ATOM | 19497 | CE1 | PHE | 1306 | 64.971 | 31.728 | 60.415 | 0.00 | 0.00 |
| ATOM | 19498 | HE1 | PHE | 1306 | 64.132 | 32.382 | 60.226 | 0.00 | 0.00 |
| ATOM | 19499 | CZ  | PHE | 1306 | 65.503 | 30.931 | 59.333 | 0.00 | 0.00 |
| ATOM | 19500 | HZ  | PHE | 1306 | 65.064 | 31.106 | 58.362 | 0.00 | 0.00 |
| ATOM | 19501 | CE2 | PHE | 1306 | 66.300 | 29.808 | 59.669 | 0.00 | 0.00 |
| ATOM | 19502 | HE2 | PHE | 1306 | 66.572 | 29.117 | 58.884 | 0.00 | 0.00 |
| ATOM | 19503 | CD2 | PHE | 1306 | 66.648 | 29.582 | 61.027 | 0.00 | 0.00 |
| ATOM | 19504 | HD2 | PHE | 1306 | 67.325 | 28.804 | 61.348 | 0.00 | 0.00 |
| ATOM | 19505 | C   | PHE | 1306 | 68.624 | 31.463 | 63.385 | 0.00 | 0.00 |
| ATOM | 19506 | O   | PHE | 1306 | 69.298 | 31.574 | 62.342 | 0.00 | 0.00 |
| ATOM | 19507 | N   | ALA | 1307 | 68.590 | 32.482 | 64.256 | 0.00 | 0.00 |
| ATOM | 19508 | H   | ALA | 1307 | 68.020 | 32.282 | 65.066 | 0.00 | 0.00 |
| ATOM | 19509 | CA  | ALA | 1307 | 69.203 | 33.796 | 64.140 | 0.00 | 0.00 |
| ATOM | 19510 | HA  | ALA | 1307 | 68.980 | 34.176 | 63.143 | 0.00 | 0.00 |
| ATOM | 19511 | CB  | ALA | 1307 | 68.597 | 34.784 | 65.102 | 0.00 | 0.00 |
| ATOM | 19512 | HB1 | ALA | 1307 | 68.508 | 34.280 | 66.064 | 0.00 | 0.00 |
| ATOM | 19513 | HB2 | ALA | 1307 | 69.304 | 35.614 | 65.108 | 0.00 | 0.00 |
| ATOM | 19514 | HB3 | ALA | 1307 | 67.595 | 35.063 | 64.777 | 0.00 | 0.00 |
| ATOM | 19515 | C   | ALA | 1307 | 70.717 | 33.692 | 64.194 | 0.00 | 0.00 |
| ATOM | 19516 | O   | ALA | 1307 | 71.341 | 34.162 | 63.240 | 0.00 | 0.00 |
| ATOM | 19517 | N   | GLU | 1308 | 71.278 | 32.973 | 65.162 | 0.00 | 0.00 |
| ATOM | 19518 | H   | GLU | 1308 | 70.679 | 32.561 | 65.863 | 0.00 | 0.00 |
| ATOM | 19519 | CA  | GLU | 1308 | 72.749 | 32.763 | 65.251 | 0.00 | 0.00 |
| ATOM | 19520 | HA  | GLU | 1308 | 73.206 | 33.729 | 65.463 | 0.00 | 0.00 |
| ATOM | 19521 | CB  | GLU | 1308 | 73.037 | 31.882 | 66.422 | 0.00 | 0.00 |
| ATOM | 19522 | HB2 | GLU | 1308 | 72.378 | 31.029 | 66.584 | 0.00 | 0.00 |

|      |       |     |     |      |        |        |        |      |      |
|------|-------|-----|-----|------|--------|--------|--------|------|------|
| ATOM | 19523 | HB3 | GLU | 1308 | 74.059 | 31.534 | 66.270 | 0.00 | 0.00 |
| ATOM | 19524 | CG  | GLU | 1308 | 73.022 | 32.660 | 67.737 | 0.00 | 0.00 |
| ATOM | 19525 | HG2 | GLU | 1308 | 73.713 | 33.489 | 67.580 | 0.00 | 0.00 |
| ATOM | 19526 | HG3 | GLU | 1308 | 72.107 | 33.032 | 68.198 | 0.00 | 0.00 |
| ATOM | 19527 | CD  | GLU | 1308 | 73.585 | 31.742 | 68.873 | 0.00 | 0.00 |
| ATOM | 19528 | OE1 | GLU | 1308 | 74.018 | 32.300 | 69.932 | 0.00 | 0.00 |
| ATOM | 19529 | OE2 | GLU | 1308 | 73.593 | 30.478 | 68.765 | 0.00 | 0.00 |
| ATOM | 19530 | C   | GLU | 1308 | 73.306 | 32.179 | 63.950 | 0.00 | 0.00 |
| ATOM | 19531 | O   | GLU | 1308 | 74.389 | 32.479 | 63.485 | 0.00 | 0.00 |
| ATOM | 19532 | N   | SER | 1309 | 72.514 | 31.293 | 63.311 | 0.00 | 0.00 |
| ATOM | 19533 | H   | SER | 1309 | 71.520 | 31.337 | 63.486 | 0.00 | 0.00 |
| ATOM | 19534 | CA  | SER | 1309 | 72.845 | 30.606 | 62.069 | 0.00 | 0.00 |
| ATOM | 19535 | HA  | SER | 1309 | 73.779 | 30.060 | 62.203 | 0.00 | 0.00 |
| ATOM | 19536 | CB  | SER | 1309 | 71.745 | 29.635 | 61.552 | 0.00 | 0.00 |
| ATOM | 19537 | HB2 | SER | 1309 | 70.887 | 30.200 | 61.190 | 0.00 | 0.00 |
| ATOM | 19538 | HB3 | SER | 1309 | 72.070 | 29.171 | 60.620 | 0.00 | 0.00 |
| ATOM | 19539 | OG  | SER | 1309 | 71.443 | 28.564 | 62.388 | 0.00 | 0.00 |
| ATOM | 19540 | HG  | SER | 1309 | 71.326 | 28.945 | 63.261 | 0.00 | 0.00 |
| ATOM | 19541 | C   | SER | 1309 | 73.052 | 31.589 | 60.842 | 0.00 | 0.00 |
| ATOM | 19542 | O   | SER | 1309 | 73.668 | 31.179 | 59.860 | 0.00 | 0.00 |
| ATOM | 19543 | N   | ARG | 1310 | 72.598 | 32.875 | 60.956 | 0.00 | 0.00 |
| ATOM | 19544 | H   | ARG | 1310 | 72.300 | 33.104 | 61.894 | 0.00 | 0.00 |
| ATOM | 19545 | CA  | ARG | 1310 | 72.974 | 33.978 | 60.016 | 0.00 | 0.00 |
| ATOM | 19546 | HA  | ARG | 1310 | 72.770 | 33.773 | 58.965 | 0.00 | 0.00 |
| ATOM | 19547 | CB  | ARG | 1310 | 72.170 | 35.228 | 60.455 | 0.00 | 0.00 |
| ATOM | 19548 | HB2 | ARG | 1310 | 72.559 | 36.013 | 59.806 | 0.00 | 0.00 |

|      |       |      |     |      |        |        |        |      |      |
|------|-------|------|-----|------|--------|--------|--------|------|------|
| ATOM | 19549 | HB3  | ARG | 1310 | 72.395 | 35.564 | 61.467 | 0.00 | 0.00 |
| ATOM | 19550 | CG   | ARG | 1310 | 70.672 | 35.142 | 60.182 | 0.00 | 0.00 |
| ATOM | 19551 | HG2  | ARG | 1310 | 70.475 | 35.191 | 59.111 | 0.00 | 0.00 |
| ATOM | 19552 | HG3  | ARG | 1310 | 70.277 | 34.268 | 60.701 | 0.00 | 0.00 |
| ATOM | 19553 | CD   | ARG | 1310 | 69.909 | 36.335 | 60.867 | 0.00 | 0.00 |
| ATOM | 19554 | HD2  | ARG | 1310 | 68.866 | 36.037 | 60.974 | 0.00 | 0.00 |
| ATOM | 19555 | HD3  | ARG | 1310 | 70.229 | 36.413 | 61.906 | 0.00 | 0.00 |
| ATOM | 19556 | NE   | ARG | 1310 | 70.077 | 37.655 | 60.312 | 0.00 | 0.00 |
| ATOM | 19557 | HE   | ARG | 1310 | 70.889 | 38.232 | 60.477 | 0.00 | 0.00 |
| ATOM | 19558 | CZ   | ARG | 1310 | 69.174 | 38.302 | 59.595 | 0.00 | 0.00 |
| ATOM | 19559 | NH1  | ARG | 1310 | 67.929 | 37.974 | 59.439 | 0.00 | 0.00 |
| ATOM | 19560 | 1HH1 | ARG | 1310 | 67.374 | 38.553 | 58.827 | 0.00 | 0.00 |
| ATOM | 19561 | 2HH1 | ARG | 1310 | 67.560 | 37.137 | 59.869 | 0.00 | 0.00 |
| ATOM | 19562 | NH2  | ARG | 1310 | 69.524 | 39.422 | 59.050 | 0.00 | 0.00 |
| ATOM | 19563 | 1HH2 | ARG | 1310 | 68.804 | 40.116 | 58.906 | 0.00 | 0.00 |
| ATOM | 19564 | 2HH2 | ARG | 1310 | 70.473 | 39.747 | 59.165 | 0.00 | 0.00 |
| ATOM | 19565 | C    | ARG | 1310 | 74.459 | 34.223 | 59.978 | 0.00 | 0.00 |
| ATOM | 19566 | O    | ARG | 1310 | 74.911 | 34.844 | 59.001 | 0.00 | 0.00 |
| ATOM | 19567 | N    | ILE | 1311 | 75.229 | 33.744 | 60.935 | 0.00 | 0.00 |
| ATOM | 19568 | H    | ILE | 1311 | 74.793 | 33.273 | 61.715 | 0.00 | 0.00 |
| ATOM | 19569 | CA   | ILE | 1311 | 76.657 | 34.125 | 61.017 | 0.00 | 0.00 |
| ATOM | 19570 | HA   | ILE | 1311 | 76.896 | 34.747 | 60.154 | 0.00 | 0.00 |
| ATOM | 19571 | CB   | ILE | 1311 | 77.132 | 34.959 | 62.229 | 0.00 | 0.00 |
| ATOM | 19572 | HB   | ILE | 1311 | 76.798 | 34.380 | 63.091 | 0.00 | 0.00 |
| ATOM | 19573 | CG2  | ILE | 1311 | 78.618 | 35.169 | 62.325 | 0.00 | 0.00 |
| ATOM | 19574 | 1HG2 | ILE | 1311 | 78.845 | 35.565 | 63.315 | 0.00 | 0.00 |

|      |       |      |     |      |        |        |        |      |      |
|------|-------|------|-----|------|--------|--------|--------|------|------|
| ATOM | 19575 | 2HG2 | ILE | 1311 | 79.173 | 34.232 | 62.293 | 0.00 | 0.00 |
| ATOM | 19576 | 3HG2 | ILE | 1311 | 78.985 | 35.825 | 61.535 | 0.00 | 0.00 |
| ATOM | 19577 | CG1  | ILE | 1311 | 76.353 | 36.252 | 62.320 | 0.00 | 0.00 |
| ATOM | 19578 | 2HG1 | ILE | 1311 | 75.272 | 36.209 | 62.453 | 0.00 | 0.00 |
| ATOM | 19579 | 3HG1 | ILE | 1311 | 76.661 | 36.779 | 63.223 | 0.00 | 0.00 |
| ATOM | 19580 | CD1  | ILE | 1311 | 76.540 | 37.291 | 61.205 | 0.00 | 0.00 |
| ATOM | 19581 | 1HD1 | ILE | 1311 | 76.127 | 36.859 | 60.294 | 0.00 | 0.00 |
| ATOM | 19582 | 2HD1 | ILE | 1311 | 76.031 | 38.205 | 61.511 | 0.00 | 0.00 |
| ATOM | 19583 | 3HD1 | ILE | 1311 | 77.582 | 37.549 | 61.021 | 0.00 | 0.00 |
| ATOM | 19584 | C    | ILE | 1311 | 77.400 | 32.827 | 60.867 | 0.00 | 0.00 |
| ATOM | 19585 | O    | ILE | 1311 | 77.469 | 31.931 | 61.773 | 0.00 | 0.00 |
| ATOM | 19586 | N    | ARG | 1312 | 78.098 | 32.713 | 59.745 | 0.00 | 0.00 |
| ATOM | 19587 | H    | ARG | 1312 | 78.079 | 33.434 | 59.038 | 0.00 | 0.00 |
| ATOM | 19588 | CA   | ARG | 1312 | 78.616 | 31.415 | 59.229 | 0.00 | 0.00 |
| ATOM | 19589 | HA   | ARG | 1312 | 78.483 | 30.686 | 60.028 | 0.00 | 0.00 |
| ATOM | 19590 | CB   | ARG | 1312 | 77.971 | 30.892 | 57.905 | 0.00 | 0.00 |
| ATOM | 19591 | HB2  | ARG | 1312 | 78.199 | 31.518 | 57.043 | 0.00 | 0.00 |
| ATOM | 19592 | HB3  | ARG | 1312 | 78.439 | 29.920 | 57.754 | 0.00 | 0.00 |
| ATOM | 19593 | CG   | ARG | 1312 | 76.374 | 30.762 | 58.032 | 0.00 | 0.00 |
| ATOM | 19594 | HG2  | ARG | 1312 | 76.069 | 29.935 | 57.392 | 0.00 | 0.00 |
| ATOM | 19595 | HG3  | ARG | 1312 | 76.090 | 30.478 | 59.046 | 0.00 | 0.00 |
| ATOM | 19596 | CD   | ARG | 1312 | 75.714 | 32.064 | 57.613 | 0.00 | 0.00 |
| ATOM | 19597 | HD2  | ARG | 1312 | 74.641 | 31.945 | 57.761 | 0.00 | 0.00 |
| ATOM | 19598 | HD3  | ARG | 1312 | 76.137 | 32.857 | 58.230 | 0.00 | 0.00 |
| ATOM | 19599 | NE   | ARG | 1312 | 75.912 | 32.410 | 56.240 | 0.00 | 0.00 |
| ATOM | 19600 | HE   | ARG | 1312 | 75.805 | 31.706 | 55.524 | 0.00 | 0.00 |

|                          |        |        |        |      |      |
|--------------------------|--------|--------|--------|------|------|
| ATOM 19601 CZ ARG 1312   | 76.143 | 33.628 | 55.747 | 0.00 | 0.00 |
| ATOM 19602 NH1 ARG 1312  | 76.075 | 34.767 | 56.292 | 0.00 | 0.00 |
| ATOM 19603 1HH1 ARG 1312 | 76.559 | 35.531 | 55.841 | 0.00 | 0.00 |
| ATOM 19604 2HH1 ARG 1312 | 75.696 | 34.820 | 57.227 | 0.00 | 0.00 |
| ATOM 19605 NH2 ARG 1312  | 76.462 | 33.729 | 54.523 | 0.00 | 0.00 |
| ATOM 19606 1HH2 ARG 1312 | 77.010 | 34.510 | 54.192 | 0.00 | 0.00 |
| ATOM 19607 2HH2 ARG 1312 | 76.746 | 32.840 | 54.137 | 0.00 | 0.00 |
| ATOM 19608 C ARG 1312    | 80.089 | 31.441 | 59.075 | 0.00 | 0.00 |
| ATOM 19609 O ARG 1312    | 80.607 | 32.148 | 58.172 | 0.00 | 0.00 |
| ATOM 19610 N ARG 1313    | 80.821 | 30.774 | 59.963 | 0.00 | 0.00 |
| ATOM 19611 H ARG 1313    | 80.534 | 30.036 | 60.590 | 0.00 | 0.00 |
| ATOM 19612 CA ARG 1313   | 82.208 | 31.165 | 60.134 | 0.00 | 0.00 |
| ATOM 19613 HA ARG 1313   | 82.334 | 32.237 | 60.284 | 0.00 | 0.00 |
| ATOM 19614 CB ARG 1313   | 82.578 | 30.483 | 61.481 | 0.00 | 0.00 |
| ATOM 19615 HB2 ARG 1313  | 81.858 | 30.698 | 62.270 | 0.00 | 0.00 |
| ATOM 19616 HB3 ARG 1313  | 82.505 | 29.396 | 61.463 | 0.00 | 0.00 |
| ATOM 19617 CG ARG 1313   | 84.024 | 30.807 | 61.900 | 0.00 | 0.00 |
| ATOM 19618 HG2 ARG 1313  | 84.789 | 30.338 | 61.282 | 0.00 | 0.00 |
| ATOM 19619 HG3 ARG 1313  | 84.197 | 31.883 | 61.920 | 0.00 | 0.00 |
| ATOM 19620 CD ARG 1313   | 84.302 | 30.306 | 63.436 | 0.00 | 0.00 |
| ATOM 19621 HD2 ARG 1313  | 83.422 | 30.570 | 64.022 | 0.00 | 0.00 |
| ATOM 19622 HD3 ARG 1313  | 84.291 | 29.216 | 63.453 | 0.00 | 0.00 |
| ATOM 19623 NE ARG 1313   | 85.542 | 30.795 | 63.935 | 0.00 | 0.00 |
| ATOM 19624 HE ARG 1313   | 86.292 | 30.961 | 63.279 | 0.00 | 0.00 |
| ATOM 19625 CZ ARG 1313   | 85.665 | 31.387 | 65.083 | 0.00 | 0.00 |
| ATOM 19626 NH1 ARG 1313  | 84.733 | 31.768 | 65.879 | 0.00 | 0.00 |

|      |       |      |     |      |        |        |        |      |      |
|------|-------|------|-----|------|--------|--------|--------|------|------|
| ATOM | 19627 | 1HH1 | ARG | 1313 | 84.951 | 32.270 | 66.728 | 0.00 | 0.00 |
| ATOM | 19628 | 2HH1 | ARG | 1313 | 83.788 | 31.879 | 65.540 | 0.00 | 0.00 |
| ATOM | 19629 | NH2  | ARG | 1313 | 86.788 | 31.919 | 65.321 | 0.00 | 0.00 |
| ATOM | 19630 | 1HH2 | ARG | 1313 | 86.948 | 32.340 | 66.225 | 0.00 | 0.00 |
| ATOM | 19631 | 2HH2 | ARG | 1313 | 87.541 | 31.839 | 64.653 | 0.00 | 0.00 |
| ATOM | 19632 | C    | ARG | 1313 | 83.135 | 30.740 | 58.988 | 0.00 | 0.00 |
| ATOM | 19633 | O    | ARG | 1313 | 84.252 | 31.313 | 58.953 | 0.00 | 0.00 |
| ATOM | 19634 | N    | GLU | 1314 | 82.827 | 29.742 | 58.170 | 0.00 | 0.00 |
| ATOM | 19635 | H    | GLU | 1314 | 82.033 | 29.202 | 58.484 | 0.00 | 0.00 |
| ATOM | 19636 | CA   | GLU | 1314 | 83.545 | 29.448 | 56.924 | 0.00 | 0.00 |
| ATOM | 19637 | HA   | GLU | 1314 | 84.599 | 29.372 | 57.192 | 0.00 | 0.00 |
| ATOM | 19638 | CB   | GLU | 1314 | 83.095 | 28.210 | 56.238 | 0.00 | 0.00 |
| ATOM | 19639 | HB2  | GLU | 1314 | 82.030 | 28.323 | 56.035 | 0.00 | 0.00 |
| ATOM | 19640 | HB3  | GLU | 1314 | 83.661 | 28.045 | 55.321 | 0.00 | 0.00 |
| ATOM | 19641 | CG   | GLU | 1314 | 83.233 | 26.920 | 57.202 | 0.00 | 0.00 |
| ATOM | 19642 | HG2  | GLU | 1314 | 82.824 | 27.208 | 58.170 | 0.00 | 0.00 |
| ATOM | 19643 | HG3  | GLU | 1314 | 82.788 | 26.048 | 56.724 | 0.00 | 0.00 |
| ATOM | 19644 | CD   | GLU | 1314 | 84.730 | 26.495 | 57.317 | 0.00 | 0.00 |
| ATOM | 19645 | OE1  | GLU | 1314 | 85.429 | 26.278 | 56.257 | 0.00 | 0.00 |
| ATOM | 19646 | OE2  | GLU | 1314 | 85.261 | 26.365 | 58.430 | 0.00 | 0.00 |
| ATOM | 19647 | C    | GLU | 1314 | 83.433 | 30.538 | 55.821 | 0.00 | 0.00 |
| ATOM | 19648 | O    | GLU | 1314 | 84.491 | 30.747 | 55.208 | 0.00 | 0.00 |
| ATOM | 19649 | N    | THR | 1315 | 82.293 | 31.290 | 55.685 | 0.00 | 0.00 |
| ATOM | 19650 | H    | THR | 1315 | 81.555 | 31.330 | 56.373 | 0.00 | 0.00 |
| ATOM | 19651 | CA   | THR | 1315 | 82.009 | 32.103 | 54.477 | 0.00 | 0.00 |
| ATOM | 19652 | HA   | THR | 1315 | 82.724 | 31.964 | 53.666 | 0.00 | 0.00 |

|      |       |      |     |      |        |        |        |      |      |
|------|-------|------|-----|------|--------|--------|--------|------|------|
| ATOM | 19653 | CB   | THR | 1315 | 80.649 | 31.618 | 53.887 | 0.00 | 0.00 |
| ATOM | 19654 | HB   | THR | 1315 | 80.678 | 32.012 | 52.871 | 0.00 | 0.00 |
| ATOM | 19655 | CG2  | THR | 1315 | 80.449 | 30.078 | 53.747 | 0.00 | 0.00 |
| ATOM | 19656 | 1HG2 | THR | 1315 | 79.597 | 29.709 | 53.175 | 0.00 | 0.00 |
| ATOM | 19657 | 2HG2 | THR | 1315 | 81.209 | 29.741 | 53.042 | 0.00 | 0.00 |
| ATOM | 19658 | 3HG2 | THR | 1315 | 80.665 | 29.525 | 54.661 | 0.00 | 0.00 |
| ATOM | 19659 | OG1  | THR | 1315 | 79.564 | 32.090 | 54.673 | 0.00 | 0.00 |
| ATOM | 19660 | HG1  | THR | 1315 | 79.267 | 32.944 | 54.351 | 0.00 | 0.00 |
| ATOM | 19661 | C    | THR | 1315 | 81.910 | 33.583 | 54.710 | 0.00 | 0.00 |
| ATOM | 19662 | O    | THR | 1315 | 82.171 | 34.418 | 53.867 | 0.00 | 0.00 |
| ATOM | 19663 | N    | ILE | 1316 | 81.570 | 34.084 | 55.926 | 0.00 | 0.00 |
| ATOM | 19664 | H    | ILE | 1316 | 81.359 | 33.416 | 56.654 | 0.00 | 0.00 |
| ATOM | 19665 | CA   | ILE | 1316 | 81.628 | 35.491 | 56.233 | 0.00 | 0.00 |
| ATOM | 19666 | HA   | ILE | 1316 | 80.916 | 35.963 | 55.554 | 0.00 | 0.00 |
| ATOM | 19667 | CB   | ILE | 1316 | 81.166 | 35.728 | 57.676 | 0.00 | 0.00 |
| ATOM | 19668 | HB   | ILE | 1316 | 80.144 | 35.352 | 57.694 | 0.00 | 0.00 |
| ATOM | 19669 | CG2  | ILE | 1316 | 82.133 | 35.114 | 58.671 | 0.00 | 0.00 |
| ATOM | 19670 | 1HG2 | ILE | 1316 | 81.711 | 35.055 | 59.674 | 0.00 | 0.00 |
| ATOM | 19671 | 2HG2 | ILE | 1316 | 82.394 | 34.088 | 58.411 | 0.00 | 0.00 |
| ATOM | 19672 | 3HG2 | ILE | 1316 | 83.096 | 35.618 | 58.764 | 0.00 | 0.00 |
| ATOM | 19673 | CG1  | ILE | 1316 | 80.985 | 37.290 | 57.940 | 0.00 | 0.00 |
| ATOM | 19674 | 2HG1 | ILE | 1316 | 81.976 | 37.727 | 58.059 | 0.00 | 0.00 |
| ATOM | 19675 | 3HG1 | ILE | 1316 | 80.475 | 37.766 | 57.103 | 0.00 | 0.00 |
| ATOM | 19676 | CD1  | ILE | 1316 | 80.155 | 37.592 | 59.233 | 0.00 | 0.00 |
| ATOM | 19677 | 1HD1 | ILE | 1316 | 79.193 | 37.122 | 59.030 | 0.00 | 0.00 |
| ATOM | 19678 | 2HD1 | ILE | 1316 | 80.576 | 37.040 | 60.073 | 0.00 | 0.00 |



|            |      |     |      |        |        |        |      |      |
|------------|------|-----|------|--------|--------|--------|------|------|
| ATOM 19679 | 3HD1 | ILE | 1316 | 80.112 | 38.670 | 59.386 | 0.00 | 0.00 |
| ATOM 19680 | C    | ILE | 1316 | 82.940 | 36.252 | 56.039 | 0.00 | 0.00 |
| ATOM 19681 | O    | ILE | 1316 | 82.956 | 37.477 | 55.721 | 0.00 | 0.00 |
| ATOM 19682 | N    | ALA | 1317 | 84.057 | 35.479 | 56.056 | 0.00 | 0.00 |
| ATOM 19683 | H    | ALA | 1317 | 83.970 | 34.473 | 56.045 | 0.00 | 0.00 |
| ATOM 19684 | CA   | ALA | 1317 | 85.434 | 35.933 | 55.956 | 0.00 | 0.00 |
| ATOM 19685 | HA   | ALA | 1317 | 85.496 | 36.862 | 56.523 | 0.00 | 0.00 |
| ATOM 19686 | CB   | ALA | 1317 | 86.252 | 34.846 | 56.504 | 0.00 | 0.00 |
| ATOM 19687 | HB1  | ALA | 1317 | 85.946 | 34.701 | 57.540 | 0.00 | 0.00 |
| ATOM 19688 | HB2  | ALA | 1317 | 85.991 | 33.951 | 55.939 | 0.00 | 0.00 |
| ATOM 19689 | HB3  | ALA | 1317 | 87.289 | 35.178 | 56.460 | 0.00 | 0.00 |
| ATOM 19690 | C    | ALA | 1317 | 85.850 | 36.384 | 54.480 | 0.00 | 0.00 |
| ATOM 19691 | O    | ALA | 1317 | 87.046 | 36.381 | 54.144 | 0.00 | 0.00 |
| ATOM 19692 | N    | ALA | 1318 | 84.907 | 36.710 | 53.695 | 0.00 | 0.00 |
| ATOM 19693 | H    | ALA | 1318 | 83.974 | 36.523 | 54.033 | 0.00 | 0.00 |
| ATOM 19694 | CA   | ALA | 1318 | 85.034 | 37.139 | 52.306 | 0.00 | 0.00 |
| ATOM 19695 | HA   | ALA | 1318 | 86.008 | 36.934 | 51.863 | 0.00 | 0.00 |
| ATOM 19696 | CB   | ALA | 1318 | 84.075 | 36.366 | 51.480 | 0.00 | 0.00 |
| ATOM 19697 | HB1  | ALA | 1318 | 84.378 | 36.435 | 50.435 | 0.00 | 0.00 |
| ATOM 19698 | HB2  | ALA | 1318 | 84.211 | 35.308 | 51.703 | 0.00 | 0.00 |
| ATOM 19699 | HB3  | ALA | 1318 | 83.052 | 36.742 | 51.442 | 0.00 | 0.00 |
| ATOM 19700 | C    | ALA | 1318 | 84.725 | 38.692 | 52.055 | 0.00 | 0.00 |
| ATOM 19701 | O    | ALA | 1318 | 85.096 | 39.268 | 50.998 | 0.00 | 0.00 |
| ATOM 19702 | N    | GLU | 1319 | 84.070 | 39.321 | 52.993 | 0.00 | 0.00 |
| ATOM 19703 | H    | GLU | 1319 | 83.918 | 38.841 | 53.868 | 0.00 | 0.00 |
| ATOM 19704 | CA   | GLU | 1319 | 83.569 | 40.657 | 52.772 | 0.00 | 0.00 |

|      |       |     |     |      |        |        |        |      |      |
|------|-------|-----|-----|------|--------|--------|--------|------|------|
| ATOM | 19705 | HA  | GLU | 1319 | 83.176 | 40.692 | 51.756 | 0.00 | 0.00 |
| ATOM | 19706 | CB  | GLU | 1319 | 82.548 | 41.079 | 53.800 | 0.00 | 0.00 |
| ATOM | 19707 | HB2 | GLU | 1319 | 82.958 | 41.054 | 54.810 | 0.00 | 0.00 |
| ATOM | 19708 | HB3 | GLU | 1319 | 82.338 | 42.125 | 53.575 | 0.00 | 0.00 |
| ATOM | 19709 | CG  | GLU | 1319 | 81.203 | 40.374 | 53.771 | 0.00 | 0.00 |
| ATOM | 19710 | HG2 | GLU | 1319 | 80.992 | 40.103 | 52.736 | 0.00 | 0.00 |
| ATOM | 19711 | HG3 | GLU | 1319 | 81.271 | 39.390 | 54.235 | 0.00 | 0.00 |
| ATOM | 19712 | CD  | GLU | 1319 | 80.001 | 41.234 | 54.142 | 0.00 | 0.00 |
| ATOM | 19713 | OE1 | GLU | 1319 | 80.062 | 41.823 | 55.268 | 0.00 | 0.00 |
| ATOM | 19714 | OE2 | GLU | 1319 | 79.189 | 41.538 | 53.236 | 0.00 | 0.00 |
| ATOM | 19715 | C   | GLU | 1319 | 84.561 | 41.735 | 52.728 | 0.00 | 0.00 |
| ATOM | 19716 | O   | GLU | 1319 | 84.347 | 42.756 | 52.032 | 0.00 | 0.00 |
| ATOM | 19717 | N   | ASP | 1320 | 85.747 | 41.595 | 53.263 | 0.00 | 0.00 |
| ATOM | 19718 | H   | ASP | 1320 | 85.969 | 40.690 | 53.651 | 0.00 | 0.00 |
| ATOM | 19719 | CA  | ASP | 1320 | 86.873 | 42.512 | 53.138 | 0.00 | 0.00 |
| ATOM | 19720 | HA  | ASP | 1320 | 86.497 | 43.524 | 52.986 | 0.00 | 0.00 |
| ATOM | 19721 | CB  | ASP | 1320 | 87.621 | 42.536 | 54.551 | 0.00 | 0.00 |
| ATOM | 19722 | HB2 | ASP | 1320 | 88.464 | 43.205 | 54.380 | 0.00 | 0.00 |
| ATOM | 19723 | HB3 | ASP | 1320 | 86.883 | 42.936 | 55.247 | 0.00 | 0.00 |
| ATOM | 19724 | CG  | ASP | 1320 | 88.292 | 41.213 | 55.086 | 0.00 | 0.00 |
| ATOM | 19725 | OD1 | ASP | 1320 | 88.755 | 41.192 | 56.235 | 0.00 | 0.00 |
| ATOM | 19726 | OD2 | ASP | 1320 | 88.431 | 40.307 | 54.241 | 0.00 | 0.00 |
| ATOM | 19727 | C   | ASP | 1320 | 87.732 | 42.251 | 51.824 | 0.00 | 0.00 |
| ATOM | 19728 | O   | ASP | 1320 | 88.127 | 43.191 | 51.240 | 0.00 | 0.00 |
| ATOM | 19729 | N   | VAL | 1321 | 87.976 | 40.981 | 51.401 | 0.00 | 0.00 |
| ATOM | 19730 | H   | VAL | 1321 | 87.829 | 40.295 | 52.128 | 0.00 | 0.00 |

|            |      |     |      |        |        |        |      |      |
|------------|------|-----|------|--------|--------|--------|------|------|
| ATOM 19731 | CA   | VAL | 1321 | 88.693 | 40.834 | 50.105 | 0.00 | 0.00 |
| ATOM 19732 | HA   | VAL | 1321 | 89.557 | 41.499 | 50.074 | 0.00 | 0.00 |
| ATOM 19733 | CB   | VAL | 1321 | 89.343 | 39.448 | 49.987 | 0.00 | 0.00 |
| ATOM 19734 | HB   | VAL | 1321 | 90.037 | 39.439 | 50.828 | 0.00 | 0.00 |
| ATOM 19735 | CG1  | VAL | 1321 | 88.353 | 38.236 | 50.047 | 0.00 | 0.00 |
| ATOM 19736 | 1HG1 | VAL | 1321 | 87.706 | 38.182 | 49.172 | 0.00 | 0.00 |
| ATOM 19737 | 2HG1 | VAL | 1321 | 88.854 | 37.277 | 50.177 | 0.00 | 0.00 |
| ATOM 19738 | 3HG1 | VAL | 1321 | 87.679 | 38.322 | 50.900 | 0.00 | 0.00 |
| ATOM 19739 | CG2  | VAL | 1321 | 90.181 | 39.346 | 48.717 | 0.00 | 0.00 |
| ATOM 19740 | 1HG2 | VAL | 1321 | 90.714 | 38.396 | 48.724 | 0.00 | 0.00 |
| ATOM 19741 | 2HG2 | VAL | 1321 | 89.559 | 39.264 | 47.825 | 0.00 | 0.00 |
| ATOM 19742 | 3HG2 | VAL | 1321 | 90.850 | 40.205 | 48.667 | 0.00 | 0.00 |
| ATOM 19743 | C    | VAL | 1321 | 87.841 | 41.155 | 48.856 | 0.00 | 0.00 |
| ATOM 19744 | O    | VAL | 1321 | 88.471 | 41.551 | 47.886 | 0.00 | 0.00 |
| ATOM 19745 | N    | LEU | 1322 | 86.555 | 41.020 | 48.962 | 0.00 | 0.00 |
| ATOM 19746 | H    | LEU | 1322 | 86.174 | 40.869 | 49.885 | 0.00 | 0.00 |
| ATOM 19747 | CA   | LEU | 1322 | 85.642 | 41.348 | 47.910 | 0.00 | 0.00 |
| ATOM 19748 | HA   | LEU | 1322 | 85.889 | 40.880 | 46.957 | 0.00 | 0.00 |
| ATOM 19749 | CB   | LEU | 1322 | 84.183 | 40.923 | 48.321 | 0.00 | 0.00 |
| ATOM 19750 | HB2  | LEU | 1322 | 84.034 | 40.973 | 49.399 | 0.00 | 0.00 |
| ATOM 19751 | HB3  | LEU | 1322 | 83.499 | 41.532 | 47.730 | 0.00 | 0.00 |
| ATOM 19752 | CG   | LEU | 1322 | 83.806 | 39.471 | 47.901 | 0.00 | 0.00 |
| ATOM 19753 | HG   | LEU | 1322 | 84.494 | 38.815 | 48.434 | 0.00 | 0.00 |
| ATOM 19754 | CD1  | LEU | 1322 | 82.414 | 39.209 | 48.402 | 0.00 | 0.00 |
| ATOM 19755 | 1HD1 | LEU | 1322 | 81.632 | 39.709 | 47.831 | 0.00 | 0.00 |
| ATOM 19756 | 2HD1 | LEU | 1322 | 82.165 | 38.152 | 48.319 | 0.00 | 0.00 |

|      |       |      |     |      |        |        |        |      |      |
|------|-------|------|-----|------|--------|--------|--------|------|------|
| ATOM | 19757 | 3HD1 | LEU | 1322 | 82.289 | 39.440 | 49.460 | 0.00 | 0.00 |
| ATOM | 19758 | CD2  | LEU | 1322 | 83.868 | 39.163 | 46.447 | 0.00 | 0.00 |
| ATOM | 19759 | 1HD2 | LEU | 1322 | 83.555 | 38.140 | 46.237 | 0.00 | 0.00 |
| ATOM | 19760 | 2HD2 | LEU | 1322 | 83.240 | 39.911 | 45.963 | 0.00 | 0.00 |
| ATOM | 19761 | 3HD2 | LEU | 1322 | 84.932 | 39.145 | 46.210 | 0.00 | 0.00 |
| ATOM | 19762 | C    | LEU | 1322 | 85.717 | 42.823 | 47.661 | 0.00 | 0.00 |
| ATOM | 19763 | O    | LEU | 1322 | 85.679 | 43.197 | 46.504 | 0.00 | 0.00 |
| ATOM | 19764 | N    | HIE | 1323 | 85.887 | 43.647 | 48.716 | 0.00 | 0.00 |
| ATOM | 19765 | H    | HIE | 1323 | 85.902 | 43.223 | 49.633 | 0.00 | 0.00 |
| ATOM | 19766 | CA   | HIE | 1323 | 86.292 | 45.078 | 48.606 | 0.00 | 0.00 |
| ATOM | 19767 | HA   | HIE | 1323 | 85.537 | 45.422 | 47.900 | 0.00 | 0.00 |
| ATOM | 19768 | CB   | HIE | 1323 | 86.430 | 45.785 | 49.940 | 0.00 | 0.00 |
| ATOM | 19769 | HB2  | HIE | 1323 | 86.773 | 45.020 | 50.637 | 0.00 | 0.00 |
| ATOM | 19770 | HB3  | HIE | 1323 | 87.081 | 46.656 | 49.865 | 0.00 | 0.00 |
| ATOM | 19771 | CG   | HIE | 1323 | 85.128 | 46.401 | 50.341 | 0.00 | 0.00 |
| ATOM | 19772 | ND1  | HIE | 1323 | 84.479 | 47.487 | 49.669 | 0.00 | 0.00 |
| ATOM | 19773 | CE1  | HIE | 1323 | 83.487 | 47.877 | 50.473 | 0.00 | 0.00 |
| ATOM | 19774 | HE1  | HIE | 1323 | 82.735 | 48.634 | 50.307 | 0.00 | 0.00 |
| ATOM | 19775 | NE2  | HIE | 1323 | 83.515 | 47.136 | 51.594 | 0.00 | 0.00 |
| ATOM | 19776 | HE2  | HIE | 1323 | 82.866 | 47.182 | 52.366 | 0.00 | 0.00 |
| ATOM | 19777 | CD2  | HIE | 1323 | 84.478 | 46.173 | 51.480 | 0.00 | 0.00 |
| ATOM | 19778 | HD2  | HIE | 1323 | 84.615 | 45.337 | 52.151 | 0.00 | 0.00 |
| ATOM | 19779 | C    | HIE | 1323 | 87.616 | 45.268 | 47.902 | 0.00 | 0.00 |
| ATOM | 19780 | O    | HIE | 1323 | 87.725 | 46.120 | 46.973 | 0.00 | 0.00 |
| ATOM | 19781 | N    | ASP | 1324 | 88.631 | 44.470 | 48.272 | 0.00 | 0.00 |
| ATOM | 19782 | H    | ASP | 1324 | 88.551 | 43.895 | 49.098 | 0.00 | 0.00 |

|            |      |     |      |        |        |        |      |      |
|------------|------|-----|------|--------|--------|--------|------|------|
| ATOM 19783 | CA   | ASP | 1324 | 89.933 | 44.602 | 47.753 | 0.00 | 0.00 |
| ATOM 19784 | HA   | ASP | 1324 | 90.257 | 45.636 | 47.864 | 0.00 | 0.00 |
| ATOM 19785 | CB   | ASP | 1324 | 90.850 | 43.656 | 48.543 | 0.00 | 0.00 |
| ATOM 19786 | HB2  | ASP | 1324 | 90.841 | 42.594 | 48.297 | 0.00 | 0.00 |
| ATOM 19787 | HB3  | ASP | 1324 | 90.526 | 43.632 | 49.583 | 0.00 | 0.00 |
| ATOM 19788 | CG   | ASP | 1324 | 92.297 | 44.147 | 48.425 | 0.00 | 0.00 |
| ATOM 19789 | OD1  | ASP | 1324 | 92.493 | 45.364 | 48.732 | 0.00 | 0.00 |
| ATOM 19790 | OD2  | ASP | 1324 | 93.198 | 43.477 | 47.952 | 0.00 | 0.00 |
| ATOM 19791 | C    | ASP | 1324 | 90.121 | 44.391 | 46.233 | 0.00 | 0.00 |
| ATOM 19792 | O    | ASP | 1324 | 90.571 | 45.185 | 45.431 | 0.00 | 0.00 |
| ATOM 19793 | N    | LEU | 1325 | 89.480 | 43.312 | 45.696 | 0.00 | 0.00 |
| ATOM 19794 | H    | LEU | 1325 | 89.042 | 42.710 | 46.378 | 0.00 | 0.00 |
| ATOM 19795 | CA   | LEU | 1325 | 89.180 | 43.001 | 44.256 | 0.00 | 0.00 |
| ATOM 19796 | HA   | LEU | 1325 | 90.140 | 42.968 | 43.741 | 0.00 | 0.00 |
| ATOM 19797 | CB   | LEU | 1325 | 88.323 | 41.713 | 44.145 | 0.00 | 0.00 |
| ATOM 19798 | HB2  | LEU | 1325 | 87.582 | 41.784 | 44.940 | 0.00 | 0.00 |
| ATOM 19799 | HB3  | LEU | 1325 | 87.738 | 41.727 | 43.225 | 0.00 | 0.00 |
| ATOM 19800 | CG   | LEU | 1325 | 89.073 | 40.360 | 44.301 | 0.00 | 0.00 |
| ATOM 19801 | HG   | LEU | 1325 | 90.010 | 40.508 | 44.838 | 0.00 | 0.00 |
| ATOM 19802 | CD1  | LEU | 1325 | 88.128 | 39.307 | 44.994 | 0.00 | 0.00 |
| ATOM 19803 | 1HD1 | LEU | 1325 | 88.647 | 38.350 | 45.046 | 0.00 | 0.00 |
| ATOM 19804 | 2HD1 | LEU | 1325 | 87.825 | 39.626 | 45.991 | 0.00 | 0.00 |
| ATOM 19805 | 3HD1 | LEU | 1325 | 87.285 | 39.043 | 44.357 | 0.00 | 0.00 |
| ATOM 19806 | CD2  | LEU | 1325 | 89.379 | 39.840 | 42.936 | 0.00 | 0.00 |
| ATOM 19807 | 1HD2 | LEU | 1325 | 88.486 | 39.890 | 42.314 | 0.00 | 0.00 |
| ATOM 19808 | 2HD2 | LEU | 1325 | 90.120 | 40.469 | 42.443 | 0.00 | 0.00 |

|      |       |      |     |      |        |        |        |      |      |
|------|-------|------|-----|------|--------|--------|--------|------|------|
| ATOM | 19809 | 3HD2 | LEU | 1325 | 89.683 | 38.803 | 43.079 | 0.00 | 0.00 |
| ATOM | 19810 | C    | LEU | 1325 | 88.483 | 44.145 | 43.556 | 0.00 | 0.00 |
| ATOM | 19811 | O    | LEU | 1325 | 88.614 | 44.291 | 42.343 | 0.00 | 0.00 |
| ATOM | 19812 | N    | GLY | 1326 | 87.649 | 44.984 | 44.218 | 0.00 | 0.00 |
| ATOM | 19813 | H    | GLY | 1326 | 87.776 | 44.859 | 45.213 | 0.00 | 0.00 |
| ATOM | 19814 | CA   | GLY | 1326 | 86.704 | 45.875 | 43.647 | 0.00 | 0.00 |
| ATOM | 19815 | HA2  | GLY | 1326 | 86.380 | 46.586 | 44.407 | 0.00 | 0.00 |
| ATOM | 19816 | HA3  | GLY | 1326 | 87.066 | 46.332 | 42.726 | 0.00 | 0.00 |
| ATOM | 19817 | C    | GLY | 1326 | 85.414 | 45.166 | 43.174 | 0.00 | 0.00 |
| ATOM | 19818 | O    | GLY | 1326 | 84.580 | 45.749 | 42.520 | 0.00 | 0.00 |
| ATOM | 19819 | N    | ALA | 1327 | 85.260 | 43.896 | 43.496 | 0.00 | 0.00 |
| ATOM | 19820 | H    | ALA | 1327 | 86.067 | 43.454 | 43.912 | 0.00 | 0.00 |
| ATOM | 19821 | CA   | ALA | 1327 | 83.902 | 43.199 | 43.486 | 0.00 | 0.00 |
| ATOM | 19822 | HA   | ALA | 1327 | 83.411 | 43.210 | 42.513 | 0.00 | 0.00 |
| ATOM | 19823 | CB   | ALA | 1327 | 84.128 | 41.785 | 44.010 | 0.00 | 0.00 |
| ATOM | 19824 | HB1  | ALA | 1327 | 83.383 | 41.091 | 43.620 | 0.00 | 0.00 |
| ATOM | 19825 | HB2  | ALA | 1327 | 85.114 | 41.414 | 43.734 | 0.00 | 0.00 |
| ATOM | 19826 | HB3  | ALA | 1327 | 84.054 | 41.884 | 45.094 | 0.00 | 0.00 |
| ATOM | 19827 | C    | ALA | 1327 | 82.907 | 44.063 | 44.277 | 0.00 | 0.00 |
| ATOM | 19828 | O    | ALA | 1327 | 81.794 | 44.404 | 43.874 | 0.00 | 0.00 |
| ATOM | 19829 | N    | PHE | 1328 | 83.191 | 44.425 | 45.516 | 0.00 | 0.00 |
| ATOM | 19830 | H    | PHE | 1328 | 84.154 | 44.249 | 45.765 | 0.00 | 0.00 |
| ATOM | 19831 | CA   | PHE | 1328 | 82.382 | 45.299 | 46.309 | 0.00 | 0.00 |
| ATOM | 19832 | HA   | PHE | 1328 | 81.318 | 45.148 | 46.132 | 0.00 | 0.00 |
| ATOM | 19833 | CB   | PHE | 1328 | 82.552 | 44.979 | 47.792 | 0.00 | 0.00 |
| ATOM | 19834 | HB2  | PHE | 1328 | 83.602 | 44.923 | 48.080 | 0.00 | 0.00 |

|      |       |     |     |      |        |        |        |      |      |
|------|-------|-----|-----|------|--------|--------|--------|------|------|
| ATOM | 19835 | HB3 | PHE | 1328 | 82.247 | 45.841 | 48.385 | 0.00 | 0.00 |
| ATOM | 19836 | CG  | PHE | 1328 | 81.787 | 43.771 | 48.336 | 0.00 | 0.00 |
| ATOM | 19837 | CD1 | PHE | 1328 | 81.743 | 43.554 | 49.691 | 0.00 | 0.00 |
| ATOM | 19838 | HD1 | PHE | 1328 | 82.308 | 44.229 | 50.317 | 0.00 | 0.00 |
| ATOM | 19839 | CE1 | PHE | 1328 | 81.027 | 42.560 | 50.278 | 0.00 | 0.00 |
| ATOM | 19840 | HE1 | PHE | 1328 | 81.054 | 42.439 | 51.351 | 0.00 | 0.00 |
| ATOM | 19841 | CZ  | PHE | 1328 | 80.274 | 41.705 | 49.471 | 0.00 | 0.00 |
| ATOM | 19842 | HZ  | PHE | 1328 | 79.806 | 40.886 | 49.997 | 0.00 | 0.00 |
| ATOM | 19843 | CE2 | PHE | 1328 | 80.168 | 41.957 | 48.071 | 0.00 | 0.00 |
| ATOM | 19844 | HE2 | PHE | 1328 | 79.507 | 41.380 | 47.442 | 0.00 | 0.00 |
| ATOM | 19845 | CD2 | PHE | 1328 | 80.914 | 43.017 | 47.526 | 0.00 | 0.00 |
| ATOM | 19846 | HD2 | PHE | 1328 | 80.719 | 43.202 | 46.480 | 0.00 | 0.00 |
| ATOM | 19847 | C   | PHE | 1328 | 82.855 | 46.715 | 46.012 | 0.00 | 0.00 |
| ATOM | 19848 | O   | PHE | 1328 | 84.111 | 46.898 | 46.063 | 0.00 | 0.00 |
| ATOM | 19849 | N   | SER | 1329 | 81.926 | 47.664 | 45.708 | 0.00 | 0.00 |
| ATOM | 19850 | H   | SER | 1329 | 80.936 | 47.513 | 45.837 | 0.00 | 0.00 |
| ATOM | 19851 | CA  | SER | 1329 | 82.327 | 48.899 | 45.084 | 0.00 | 0.00 |
| ATOM | 19852 | HA  | SER | 1329 | 83.382 | 48.892 | 44.809 | 0.00 | 0.00 |
| ATOM | 19853 | CB  | SER | 1329 | 81.656 | 49.029 | 43.694 | 0.00 | 0.00 |
| ATOM | 19854 | HB2 | SER | 1329 | 80.570 | 49.084 | 43.771 | 0.00 | 0.00 |
| ATOM | 19855 | HB3 | SER | 1329 | 82.005 | 49.949 | 43.225 | 0.00 | 0.00 |
| ATOM | 19856 | OG  | SER | 1329 | 81.863 | 47.877 | 42.868 | 0.00 | 0.00 |
| ATOM | 19857 | HG  | SER | 1329 | 82.665 | 47.986 | 42.352 | 0.00 | 0.00 |
| ATOM | 19858 | C   | SER | 1329 | 82.106 | 50.205 | 45.829 | 0.00 | 0.00 |
| ATOM | 19859 | O   | SER | 1329 | 82.715 | 51.252 | 45.459 | 0.00 | 0.00 |
| ATOM | 19860 | N   | LEU | 1330 | 81.285 | 50.216 | 46.889 | 0.00 | 0.00 |

|            |      |     |      |        |        |        |      |      |
|------------|------|-----|------|--------|--------|--------|------|------|
| ATOM 19861 | H    | LEU | 1330 | 80.801 | 49.344 | 47.047 | 0.00 | 0.00 |
| ATOM 19862 | CA   | LEU | 1330 | 81.017 | 51.390 | 47.726 | 0.00 | 0.00 |
| ATOM 19863 | HA   | LEU | 1330 | 81.879 | 52.035 | 47.555 | 0.00 | 0.00 |
| ATOM 19864 | CB   | LEU | 1330 | 79.818 | 52.147 | 47.030 | 0.00 | 0.00 |
| ATOM 19865 | HB2  | LEU | 1330 | 79.877 | 53.178 | 47.378 | 0.00 | 0.00 |
| ATOM 19866 | HB3  | LEU | 1330 | 80.028 | 52.243 | 45.964 | 0.00 | 0.00 |
| ATOM 19867 | CG   | LEU | 1330 | 78.357 | 51.674 | 47.185 | 0.00 | 0.00 |
| ATOM 19868 | HG   | LEU | 1330 | 77.708 | 52.238 | 46.516 | 0.00 | 0.00 |
| ATOM 19869 | CD1  | LEU | 1330 | 78.078 | 50.225 | 46.806 | 0.00 | 0.00 |
| ATOM 19870 | 1HD1 | LEU | 1330 | 78.287 | 49.528 | 47.618 | 0.00 | 0.00 |
| ATOM 19871 | 2HD1 | LEU | 1330 | 77.035 | 50.054 | 46.539 | 0.00 | 0.00 |
| ATOM 19872 | 3HD1 | LEU | 1330 | 78.600 | 49.788 | 45.955 | 0.00 | 0.00 |
| ATOM 19873 | CD2  | LEU | 1330 | 77.781 | 51.917 | 48.554 | 0.00 | 0.00 |
| ATOM 19874 | 1HD2 | LEU | 1330 | 78.161 | 51.157 | 49.237 | 0.00 | 0.00 |
| ATOM 19875 | 2HD2 | LEU | 1330 | 77.962 | 52.887 | 49.017 | 0.00 | 0.00 |
| ATOM 19876 | 3HD2 | LEU | 1330 | 76.697 | 51.818 | 48.493 | 0.00 | 0.00 |
| ATOM 19877 | C    | LEU | 1330 | 80.767 | 51.059 | 49.212 | 0.00 | 0.00 |
| ATOM 19878 | O    | LEU | 1330 | 80.589 | 49.869 | 49.477 | 0.00 | 0.00 |
| ATOM 19879 | N    | THR | 1331 | 80.876 | 52.016 | 50.174 | 0.00 | 0.00 |
| ATOM 19880 | H    | THR | 1331 | 81.028 | 52.965 | 49.864 | 0.00 | 0.00 |
| ATOM 19881 | CA   | THR | 1331 | 80.916 | 51.790 | 51.664 | 0.00 | 0.00 |
| ATOM 19882 | HA   | THR | 1331 | 81.243 | 50.768 | 51.855 | 0.00 | 0.00 |
| ATOM 19883 | CB   | THR | 1331 | 81.949 | 52.705 | 52.373 | 0.00 | 0.00 |
| ATOM 19884 | HB   | THR | 1331 | 81.739 | 53.767 | 52.246 | 0.00 | 0.00 |
| ATOM 19885 | CG2  | THR | 1331 | 82.303 | 52.308 | 53.859 | 0.00 | 0.00 |
| ATOM 19886 | 1HG2 | THR | 1331 | 81.543 | 52.333 | 54.640 | 0.00 | 0.00 |



|            |      |     |      |        |        |        |      |      |
|------------|------|-----|------|--------|--------|--------|------|------|
| ATOM 19887 | 2HG2 | THR | 1331 | 82.902 | 51.399 | 53.915 | 0.00 | 0.00 |
| ATOM 19888 | 3HG2 | THR | 1331 | 82.848 | 53.196 | 54.177 | 0.00 | 0.00 |
| ATOM 19889 | OG1  | THR | 1331 | 83.119 | 52.512 | 51.657 | 0.00 | 0.00 |
| ATOM 19890 | HG1  | THR | 1331 | 83.896 | 52.652 | 52.204 | 0.00 | 0.00 |
| ATOM 19891 | C    | THR | 1331 | 79.511 | 51.860 | 52.316 | 0.00 | 0.00 |
| ATOM 19892 | O    | THR | 1331 | 78.575 | 52.364 | 51.724 | 0.00 | 0.00 |
| ATOM 19893 | N    | SER | 1332 | 79.359 | 51.406 | 53.577 | 0.00 | 0.00 |
| ATOM 19894 | H    | SER | 1332 | 80.174 | 51.007 | 54.021 | 0.00 | 0.00 |
| ATOM 19895 | CA   | SER | 1332 | 78.104 | 51.535 | 54.330 | 0.00 | 0.00 |
| ATOM 19896 | HA   | SER | 1332 | 77.713 | 52.544 | 54.199 | 0.00 | 0.00 |
| ATOM 19897 | CB   | SER | 1332 | 77.091 | 50.457 | 53.971 | 0.00 | 0.00 |
| ATOM 19898 | HB2  | SER | 1332 | 77.440 | 49.529 | 54.425 | 0.00 | 0.00 |
| ATOM 19899 | HB3  | SER | 1332 | 76.187 | 50.718 | 54.521 | 0.00 | 0.00 |
| ATOM 19900 | OG   | SER | 1332 | 76.835 | 50.454 | 52.547 | 0.00 | 0.00 |
| ATOM 19901 | HG   | SER | 1332 | 76.931 | 51.374 | 52.291 | 0.00 | 0.00 |
| ATOM 19902 | C    | SER | 1332 | 78.294 | 51.498 | 55.921 | 0.00 | 0.00 |
| ATOM 19903 | O    | SER | 1332 | 79.139 | 50.731 | 56.459 | 0.00 | 0.00 |
| ATOM 19904 | N    | SER | 1333 | 77.431 | 52.196 | 56.638 | 0.00 | 0.00 |
| ATOM 19905 | H    | SER | 1333 | 76.940 | 52.986 | 56.243 | 0.00 | 0.00 |
| ATOM 19906 | CA   | SER | 1333 | 77.583 | 52.337 | 58.091 | 0.00 | 0.00 |
| ATOM 19907 | HA   | SER | 1333 | 78.590 | 52.172 | 58.475 | 0.00 | 0.00 |
| ATOM 19908 | CB   | SER | 1333 | 77.098 | 53.778 | 58.501 | 0.00 | 0.00 |
| ATOM 19909 | HB2  | SER | 1333 | 76.907 | 53.763 | 59.574 | 0.00 | 0.00 |
| ATOM 19910 | HB3  | SER | 1333 | 77.856 | 54.509 | 58.222 | 0.00 | 0.00 |
| ATOM 19911 | OG   | SER | 1333 | 75.857 | 53.942 | 57.934 | 0.00 | 0.00 |
| ATOM 19912 | HG   | SER | 1333 | 76.024 | 54.221 | 57.031 | 0.00 | 0.00 |

|      |       |     |     |      |        |        |        |      |      |
|------|-------|-----|-----|------|--------|--------|--------|------|------|
| ATOM | 19913 | C   | SER | 1333 | 76.721 | 51.274 | 58.820 | 0.00 | 0.00 |
| ATOM | 19914 | O   | SER | 1333 | 77.117 | 50.732 | 59.846 | 0.00 | 0.00 |
| ATOM | 19915 | N   | A21 | 1334 | 75.476 | 51.036 | 58.295 | 0.00 | 0.00 |
| ATOM | 19916 | H   | A21 | 1334 | 75.166 | 51.689 | 57.590 | 0.00 | 0.00 |
| ATOM | 19917 | CA  | A21 | 1334 | 74.405 | 50.361 | 59.034 | 0.00 | 0.00 |
| ATOM | 19918 | HA  | A21 | 1334 | 73.503 | 50.497 | 58.438 | 0.00 | 0.00 |
| ATOM | 19919 | CB  | A21 | 1334 | 74.773 | 48.899 | 58.964 | 0.00 | 0.00 |
| ATOM | 19920 | HB2 | A21 | 1334 | 75.448 | 48.673 | 58.139 | 0.00 | 0.00 |
| ATOM | 19921 | HB3 | A21 | 1334 | 75.332 | 48.733 | 59.886 | 0.00 | 0.00 |
| ATOM | 19922 | CG  | A21 | 1334 | 73.536 | 47.938 | 58.703 | 0.00 | 0.00 |
| ATOM | 19923 | OD1 | A21 | 1334 | 72.427 | 48.345 | 59.106 | 0.00 | 0.00 |
| ATOM | 19924 | OD2 | A21 | 1334 | 73.750 | 46.827 | 58.131 | 0.00 | 0.00 |
| ATOM | 19925 | C   | A21 | 1334 | 74.065 | 51.007 | 60.361 | 0.00 | 0.00 |
| ATOM | 19926 | O   | A21 | 1334 | 73.856 | 50.312 | 61.329 | 0.00 | 0.00 |
| ATOM | 19927 | N   | SER | 1335 | 74.181 | 52.282 | 60.442 | 0.00 | 0.00 |
| ATOM | 19928 | H   | SER | 1335 | 74.337 | 52.708 | 59.540 | 0.00 | 0.00 |
| ATOM | 19929 | CA  | SER | 1335 | 74.298 | 53.124 | 61.624 | 0.00 | 0.00 |
| ATOM | 19930 | HA  | SER | 1335 | 75.286 | 52.954 | 62.054 | 0.00 | 0.00 |
| ATOM | 19931 | CB  | SER | 1335 | 74.159 | 54.638 | 61.250 | 0.00 | 0.00 |
| ATOM | 19932 | HB2 | SER | 1335 | 74.143 | 55.285 | 62.127 | 0.00 | 0.00 |
| ATOM | 19933 | HB3 | SER | 1335 | 74.970 | 54.943 | 60.589 | 0.00 | 0.00 |
| ATOM | 19934 | OG  | SER | 1335 | 72.852 | 54.805 | 60.729 | 0.00 | 0.00 |
| ATOM | 19935 | HG  | SER | 1335 | 72.214 | 54.685 | 61.436 | 0.00 | 0.00 |
| ATOM | 19936 | C   | SER | 1335 | 73.334 | 52.770 | 62.732 | 0.00 | 0.00 |
| ATOM | 19937 | O   | SER | 1335 | 72.173 | 52.927 | 62.534 | 0.00 | 0.00 |
| ATOM | 19938 | N   | GLN | 1336 | 73.813 | 52.262 | 63.879 | 0.00 | 0.00 |

|      |       |      |     |      |        |        |        |      |      |
|------|-------|------|-----|------|--------|--------|--------|------|------|
| ATOM | 19939 | H    | GLN | 1336 | 74.753 | 51.898 | 63.937 | 0.00 | 0.00 |
| ATOM | 19940 | CA   | GLN | 1336 | 73.058 | 52.007 | 65.112 | 0.00 | 0.00 |
| ATOM | 19941 | HA   | GLN | 1336 | 73.788 | 51.558 | 65.785 | 0.00 | 0.00 |
| ATOM | 19942 | CB   | GLN | 1336 | 72.694 | 53.247 | 65.908 | 0.00 | 0.00 |
| ATOM | 19943 | HB2  | GLN | 1336 | 71.937 | 53.860 | 65.419 | 0.00 | 0.00 |
| ATOM | 19944 | HB3  | GLN | 1336 | 72.207 | 52.898 | 66.818 | 0.00 | 0.00 |
| ATOM | 19945 | CG   | GLN | 1336 | 73.961 | 54.150 | 66.315 | 0.00 | 0.00 |
| ATOM | 19946 | HG2  | GLN | 1336 | 73.667 | 55.013 | 66.913 | 0.00 | 0.00 |
| ATOM | 19947 | HG3  | GLN | 1336 | 74.567 | 53.575 | 67.015 | 0.00 | 0.00 |
| ATOM | 19948 | CD   | GLN | 1336 | 74.655 | 54.723 | 65.095 | 0.00 | 0.00 |
| ATOM | 19949 | OE1  | GLN | 1336 | 74.143 | 55.559 | 64.333 | 0.00 | 0.00 |
| ATOM | 19950 | NE2  | GLN | 1336 | 75.789 | 54.274 | 64.765 | 0.00 | 0.00 |
| ATOM | 19951 | 1HE2 | GLN | 1336 | 76.188 | 54.664 | 63.923 | 0.00 | 0.00 |
| ATOM | 19952 | 2HE2 | GLN | 1336 | 76.322 | 53.569 | 65.253 | 0.00 | 0.00 |
| ATOM | 19953 | C    | GLN | 1336 | 72.008 | 50.923 | 64.991 | 0.00 | 0.00 |
| ATOM | 19954 | O    | GLN | 1336 | 71.123 | 50.763 | 65.822 | 0.00 | 0.00 |
| ATOM | 19955 | N    | ALA | 1337 | 71.940 | 50.281 | 63.806 | 0.00 | 0.00 |
| ATOM | 19956 | H    | ALA | 1337 | 72.447 | 50.642 | 63.011 | 0.00 | 0.00 |
| ATOM | 19957 | CA   | ALA | 1337 | 71.045 | 49.093 | 63.539 | 0.00 | 0.00 |
| ATOM | 19958 | HA   | ALA | 1337 | 70.294 | 48.998 | 64.323 | 0.00 | 0.00 |
| ATOM | 19959 | CB   | ALA | 1337 | 70.260 | 49.589 | 62.286 | 0.00 | 0.00 |
| ATOM | 19960 | HB1  | ALA | 1337 | 69.689 | 50.489 | 62.517 | 0.00 | 0.00 |
| ATOM | 19961 | HB2  | ALA | 1337 | 71.010 | 49.804 | 61.525 | 0.00 | 0.00 |
| ATOM | 19962 | HB3  | ALA | 1337 | 69.652 | 48.787 | 61.867 | 0.00 | 0.00 |
| ATOM | 19963 | C    | ALA | 1337 | 71.922 | 47.825 | 63.390 | 0.00 | 0.00 |
| ATOM | 19964 | O    | ALA | 1337 | 71.452 | 46.697 | 63.710 | 0.00 | 0.00 |

|      |       |     |     |      |        |        |        |      |      |
|------|-------|-----|-----|------|--------|--------|--------|------|------|
| ATOM | 19965 | N   | MET | 1338 | 73.166 | 47.876 | 62.898 | 0.00 | 0.00 |
| ATOM | 19966 | H   | MET | 1338 | 73.364 | 48.712 | 62.366 | 0.00 | 0.00 |
| ATOM | 19967 | CA  | MET | 1338 | 74.135 | 46.804 | 62.873 | 0.00 | 0.00 |
| ATOM | 19968 | HA  | MET | 1338 | 74.066 | 46.122 | 63.720 | 0.00 | 0.00 |
| ATOM | 19969 | CB  | MET | 1338 | 73.891 | 45.869 | 61.636 | 0.00 | 0.00 |
| ATOM | 19970 | HB2 | MET | 1338 | 72.996 | 45.359 | 61.995 | 0.00 | 0.00 |
| ATOM | 19971 | HB3 | MET | 1338 | 73.691 | 46.447 | 60.734 | 0.00 | 0.00 |
| ATOM | 19972 | CG  | MET | 1338 | 74.905 | 44.686 | 61.323 | 0.00 | 0.00 |
| ATOM | 19973 | HG2 | MET | 1338 | 75.463 | 44.972 | 60.432 | 0.00 | 0.00 |
| ATOM | 19974 | HG3 | MET | 1338 | 75.527 | 44.524 | 62.204 | 0.00 | 0.00 |
| ATOM | 19975 | SD  | MET | 1338 | 74.252 | 43.063 | 60.967 | 0.00 | 0.00 |
| ATOM | 19976 | CE  | MET | 1338 | 73.685 | 42.686 | 62.724 | 0.00 | 0.00 |
| ATOM | 19977 | HE1 | MET | 1338 | 74.450 | 42.732 | 63.498 | 0.00 | 0.00 |
| ATOM | 19978 | HE2 | MET | 1338 | 72.961 | 43.436 | 63.042 | 0.00 | 0.00 |
| ATOM | 19979 | HE3 | MET | 1338 | 73.256 | 41.685 | 62.673 | 0.00 | 0.00 |
| ATOM | 19980 | C   | MET | 1338 | 75.525 | 47.304 | 62.955 | 0.00 | 0.00 |
| ATOM | 19981 | O   | MET | 1338 | 76.487 | 46.495 | 63.175 | 0.00 | 0.00 |
| TER  | 0     |     |     | 0    |        |        |        |      |      |
| ATOM | 19982 | N   | GLY | 1339 | 75.788 | 48.605 | 62.803 | 0.00 | 0.00 |
| ATOM | 19983 | H   | GLY | 1339 | 74.997 | 49.180 | 62.551 | 0.00 | 0.00 |
| ATOM | 19984 | CA  | GLY | 1339 | 77.161 | 49.052 | 62.523 | 0.00 | 0.00 |
| ATOM | 19985 | HA2 | GLY | 1339 | 77.870 | 48.491 | 63.133 | 0.00 | 0.00 |
| ATOM | 19986 | HA3 | GLY | 1339 | 77.392 | 48.826 | 61.482 | 0.00 | 0.00 |
| ATOM | 19987 | C   | GLY | 1339 | 77.461 | 50.490 | 62.857 | 0.00 | 0.00 |
| ATOM | 19988 | O   | GLY | 1339 | 76.608 | 51.279 | 63.150 | 0.00 | 0.00 |
| ATOM | 19989 | N   | ARG | 1340 | 78.708 | 50.958 | 62.668 | 0.00 | 0.00 |

|            |      |     |      |        |        |        |      |      |
|------------|------|-----|------|--------|--------|--------|------|------|
| ATOM 19990 | H    | ARG | 1340 | 79.372 | 50.468 | 62.086 | 0.00 | 0.00 |
| ATOM 19991 | CA   | ARG | 1340 | 79.225 | 52.187 | 63.175 | 0.00 | 0.00 |
| ATOM 19992 | HA   | ARG | 1340 | 78.559 | 52.452 | 63.997 | 0.00 | 0.00 |
| ATOM 19993 | CB   | ARG | 1340 | 80.610 | 52.023 | 63.810 | 0.00 | 0.00 |
| ATOM 19994 | HB2  | ARG | 1340 | 81.355 | 51.598 | 63.137 | 0.00 | 0.00 |
| ATOM 19995 | HB3  | ARG | 1340 | 80.995 | 53.034 | 63.944 | 0.00 | 0.00 |
| ATOM 19996 | CG   | ARG | 1340 | 80.575 | 51.246 | 65.155 | 0.00 | 0.00 |
| ATOM 19997 | HG2  | ARG | 1340 | 81.003 | 51.823 | 65.975 | 0.00 | 0.00 |
| ATOM 19998 | HG3  | ARG | 1340 | 79.529 | 51.013 | 65.354 | 0.00 | 0.00 |
| ATOM 19999 | CD   | ARG | 1340 | 81.295 | 49.871 | 65.084 | 0.00 | 0.00 |
| ATOM 20000 | HD2  | ARG | 1340 | 80.912 | 49.454 | 64.153 | 0.00 | 0.00 |
| ATOM 20001 | HD3  | ARG | 1340 | 82.343 | 50.166 | 65.038 | 0.00 | 0.00 |
| ATOM 20002 | NE   | ARG | 1340 | 80.983 | 49.044 | 66.259 | 0.00 | 0.00 |
| ATOM 20003 | HE   | ARG | 1340 | 80.699 | 49.528 | 67.099 | 0.00 | 0.00 |
| ATOM 20004 | CZ   | ARG | 1340 | 81.074 | 47.763 | 66.357 | 0.00 | 0.00 |
| ATOM 20005 | NH1  | ARG | 1340 | 81.743 | 46.984 | 65.492 | 0.00 | 0.00 |
| ATOM 20006 | 1HH1 | ARG | 1340 | 81.801 | 45.988 | 65.654 | 0.00 | 0.00 |
| ATOM 20007 | 2HH1 | ARG | 1340 | 82.397 | 47.555 | 64.977 | 0.00 | 0.00 |
| ATOM 20008 | NH2  | ARG | 1340 | 80.448 | 47.207 | 67.347 | 0.00 | 0.00 |
| ATOM 20009 | 1HH2 | ARG | 1340 | 80.783 | 46.265 | 67.486 | 0.00 | 0.00 |
| ATOM 20010 | 2HH2 | ARG | 1340 | 80.038 | 47.822 | 68.036 | 0.00 | 0.00 |
| ATOM 20011 | C    | ARG | 1340 | 79.242 | 53.384 | 62.200 | 0.00 | 0.00 |
| ATOM 20012 | O    | ARG | 1340 | 79.521 | 53.289 | 61.009 | 0.00 | 0.00 |
| ATOM 20013 | N    | VAL | 1341 | 78.913 | 54.507 | 62.821 | 0.00 | 0.00 |
| ATOM 20014 | H    | VAL | 1341 | 78.814 | 54.450 | 63.825 | 0.00 | 0.00 |
| ATOM 20015 | CA   | VAL | 1341 | 78.494 | 55.739 | 61.989 | 0.00 | 0.00 |

|      |       |      |     |      |        |        |        |      |      |
|------|-------|------|-----|------|--------|--------|--------|------|------|
| ATOM | 20016 | HA   | VAL | 1341 | 78.333 | 55.313 | 60.999 | 0.00 | 0.00 |
| ATOM | 20017 | CB   | VAL | 1341 | 77.077 | 56.180 | 62.410 | 0.00 | 0.00 |
| ATOM | 20018 | HB   | VAL | 1341 | 76.487 | 55.270 | 62.523 | 0.00 | 0.00 |
| ATOM | 20019 | CG1  | VAL | 1341 | 77.194 | 57.004 | 63.716 | 0.00 | 0.00 |
| ATOM | 20020 | 1HG1 | VAL | 1341 | 77.631 | 56.331 | 64.454 | 0.00 | 0.00 |
| ATOM | 20021 | 2HG1 | VAL | 1341 | 77.842 | 57.877 | 63.643 | 0.00 | 0.00 |
| ATOM | 20022 | 3HG1 | VAL | 1341 | 76.213 | 57.268 | 64.111 | 0.00 | 0.00 |
| ATOM | 20023 | CG2  | VAL | 1341 | 76.347 | 57.091 | 61.420 | 0.00 | 0.00 |
| ATOM | 20024 | 1HG2 | VAL | 1341 | 75.321 | 57.259 | 61.750 | 0.00 | 0.00 |
| ATOM | 20025 | 2HG2 | VAL | 1341 | 76.827 | 58.069 | 61.435 | 0.00 | 0.00 |
| ATOM | 20026 | 3HG2 | VAL | 1341 | 76.319 | 56.526 | 60.488 | 0.00 | 0.00 |
| ATOM | 20027 | C    | VAL | 1341 | 79.606 | 56.783 | 61.772 | 0.00 | 0.00 |
| ATOM | 20028 | O    | VAL | 1341 | 79.693 | 57.326 | 60.689 | 0.00 | 0.00 |
| ATOM | 20029 | N    | GLY | 1342 | 80.441 | 56.984 | 62.801 | 0.00 | 0.00 |
| ATOM | 20030 | H    | GLY | 1342 | 80.188 | 56.637 | 63.715 | 0.00 | 0.00 |
| ATOM | 20031 | CA   | GLY | 1342 | 81.564 | 57.920 | 62.658 | 0.00 | 0.00 |
| ATOM | 20032 | HA2  | GLY | 1342 | 81.430 | 58.764 | 61.982 | 0.00 | 0.00 |
| ATOM | 20033 | HA3  | GLY | 1342 | 81.768 | 58.402 | 63.614 | 0.00 | 0.00 |
| ATOM | 20034 | C    | GLY | 1342 | 82.838 | 57.199 | 62.251 | 0.00 | 0.00 |
| ATOM | 20035 | O    | GLY | 1342 | 83.914 | 57.745 | 62.575 | 0.00 | 0.00 |
| ATOM | 20036 | N    | GLU | 1343 | 82.735 | 56.054 | 61.624 | 0.00 | 0.00 |
| ATOM | 20037 | H    | GLU | 1343 | 81.824 | 55.623 | 61.548 | 0.00 | 0.00 |
| ATOM | 20038 | CA   | GLU | 1343 | 83.875 | 55.061 | 61.600 | 0.00 | 0.00 |
| ATOM | 20039 | HA   | GLU | 1343 | 84.824 | 55.443 | 61.975 | 0.00 | 0.00 |
| ATOM | 20040 | CB   | GLU | 1343 | 83.530 | 53.975 | 62.627 | 0.00 | 0.00 |
| ATOM | 20041 | HB2  | GLU | 1343 | 83.006 | 54.437 | 63.463 | 0.00 | 0.00 |

|      |       |      |     |      |        |        |        |      |      |
|------|-------|------|-----|------|--------|--------|--------|------|------|
| ATOM | 20042 | HB3  | GLU | 1343 | 82.793 | 53.235 | 62.316 | 0.00 | 0.00 |
| ATOM | 20043 | CG   | GLU | 1343 | 84.796 | 53.363 | 63.238 | 0.00 | 0.00 |
| ATOM | 20044 | HG2  | GLU | 1343 | 85.278 | 52.766 | 62.465 | 0.00 | 0.00 |
| ATOM | 20045 | HG3  | GLU | 1343 | 85.489 | 54.145 | 63.548 | 0.00 | 0.00 |
| ATOM | 20046 | CD   | GLU | 1343 | 84.449 | 52.632 | 64.455 | 0.00 | 0.00 |
| ATOM | 20047 | OE1  | GLU | 1343 | 84.223 | 53.240 | 65.559 | 0.00 | 0.00 |
| ATOM | 20048 | OE2  | GLU | 1343 | 84.374 | 51.395 | 64.383 | 0.00 | 0.00 |
| ATOM | 20049 | C    | GLU | 1343 | 84.068 | 54.436 | 60.188 | 0.00 | 0.00 |
| ATOM | 20050 | O    | GLU | 1343 | 84.890 | 53.532 | 59.971 | 0.00 | 0.00 |
| ATOM | 20051 | N    | VAL | 1344 | 83.399 | 55.041 | 59.105 | 0.00 | 0.00 |
| ATOM | 20052 | H    | VAL | 1344 | 82.669 | 55.679 | 59.389 | 0.00 | 0.00 |
| ATOM | 20053 | CA   | VAL | 1344 | 83.382 | 54.403 | 57.791 | 0.00 | 0.00 |
| ATOM | 20054 | HA   | VAL | 1344 | 83.460 | 53.319 | 57.878 | 0.00 | 0.00 |
| ATOM | 20055 | CB   | VAL | 1344 | 82.088 | 54.734 | 57.017 | 0.00 | 0.00 |
| ATOM | 20056 | HB   | VAL | 1344 | 82.295 | 54.561 | 55.961 | 0.00 | 0.00 |
| ATOM | 20057 | CG1  | VAL | 1344 | 80.968 | 53.820 | 57.547 | 0.00 | 0.00 |
| ATOM | 20058 | 1HG1 | VAL | 1344 | 80.019 | 53.953 | 57.027 | 0.00 | 0.00 |
| ATOM | 20059 | 2HG1 | VAL | 1344 | 81.173 | 52.760 | 57.399 | 0.00 | 0.00 |
| ATOM | 20060 | 3HG1 | VAL | 1344 | 80.691 | 54.037 | 58.579 | 0.00 | 0.00 |
| ATOM | 20061 | CG2  | VAL | 1344 | 81.762 | 56.260 | 57.059 | 0.00 | 0.00 |
| ATOM | 20062 | 1HG2 | VAL | 1344 | 81.550 | 56.670 | 58.047 | 0.00 | 0.00 |
| ATOM | 20063 | 2HG2 | VAL | 1344 | 82.621 | 56.833 | 56.709 | 0.00 | 0.00 |
| ATOM | 20064 | 3HG2 | VAL | 1344 | 81.001 | 56.506 | 56.319 | 0.00 | 0.00 |
| ATOM | 20065 | C    | VAL | 1344 | 84.654 | 54.715 | 56.998 | 0.00 | 0.00 |
| ATOM | 20066 | O    | VAL | 1344 | 84.981 | 53.923 | 56.163 | 0.00 | 0.00 |
| ATOM | 20067 | N    | ILE | 1345 | 85.243 | 55.858 | 57.177 | 0.00 | 0.00 |

|            |      |     |      |        |        |        |      |      |
|------------|------|-----|------|--------|--------|--------|------|------|
| ATOM 20068 | H    | ILE | 1345 | 84.826 | 56.533 | 57.802 | 0.00 | 0.00 |
| ATOM 20069 | CA   | ILE | 1345 | 86.417 | 56.329 | 56.499 | 0.00 | 0.00 |
| ATOM 20070 | HA   | ILE | 1345 | 86.294 | 56.127 | 55.436 | 0.00 | 0.00 |
| ATOM 20071 | CB   | ILE | 1345 | 86.583 | 57.872 | 56.701 | 0.00 | 0.00 |
| ATOM 20072 | HB   | ILE | 1345 | 86.948 | 58.057 | 57.711 | 0.00 | 0.00 |
| ATOM 20073 | CG2  | ILE | 1345 | 87.762 | 58.276 | 55.792 | 0.00 | 0.00 |
| ATOM 20074 | 1HG2 | ILE | 1345 | 87.918 | 59.334 | 56.002 | 0.00 | 0.00 |
| ATOM 20075 | 2HG2 | ILE | 1345 | 88.736 | 57.830 | 55.989 | 0.00 | 0.00 |
| ATOM 20076 | 3HG2 | ILE | 1345 | 87.456 | 58.136 | 54.755 | 0.00 | 0.00 |
| ATOM 20077 | CG1  | ILE | 1345 | 85.374 | 58.793 | 56.454 | 0.00 | 0.00 |
| ATOM 20078 | 2HG1 | ILE | 1345 | 84.617 | 58.750 | 57.237 | 0.00 | 0.00 |
| ATOM 20079 | 3HG1 | ILE | 1345 | 85.760 | 59.811 | 56.497 | 0.00 | 0.00 |
| ATOM 20080 | CD1  | ILE | 1345 | 84.585 | 58.600 | 55.149 | 0.00 | 0.00 |
| ATOM 20081 | 1HD1 | ILE | 1345 | 84.703 | 59.468 | 54.500 | 0.00 | 0.00 |
| ATOM 20082 | 2HD1 | ILE | 1345 | 84.971 | 57.793 | 54.526 | 0.00 | 0.00 |
| ATOM 20083 | 3HD1 | ILE | 1345 | 83.524 | 58.375 | 55.257 | 0.00 | 0.00 |
| ATOM 20084 | C    | ILE | 1345 | 87.674 | 55.643 | 57.106 | 0.00 | 0.00 |
| ATOM 20085 | O    | ILE | 1345 | 88.347 | 54.947 | 56.399 | 0.00 | 0.00 |
| ATOM 20086 | N    | LEU | 1346 | 87.805 | 55.605 | 58.429 | 0.00 | 0.00 |
| ATOM 20087 | H    | LEU | 1346 | 87.059 | 56.070 | 58.927 | 0.00 | 0.00 |
| ATOM 20088 | CA   | LEU | 1346 | 88.768 | 54.827 | 59.227 | 0.00 | 0.00 |
| ATOM 20089 | HA   | LEU | 1346 | 89.756 | 55.277 | 59.129 | 0.00 | 0.00 |
| ATOM 20090 | CB   | LEU | 1346 | 88.391 | 55.051 | 60.695 | 0.00 | 0.00 |
| ATOM 20091 | HB2  | LEU | 1346 | 88.477 | 56.097 | 60.988 | 0.00 | 0.00 |
| ATOM 20092 | HB3  | LEU | 1346 | 87.353 | 54.721 | 60.733 | 0.00 | 0.00 |
| ATOM 20093 | CG   | LEU | 1346 | 89.224 | 54.251 | 61.778 | 0.00 | 0.00 |



|            |      |     |      |        |        |        |      |      |
|------------|------|-----|------|--------|--------|--------|------|------|
| ATOM 20094 | HG   | LEU | 1346 | 89.208 | 53.195 | 61.509 | 0.00 | 0.00 |
| ATOM 20095 | CD1  | LEU | 1346 | 90.700 | 54.648 | 61.825 | 0.00 | 0.00 |
| ATOM 20096 | 1HD1 | LEU | 1346 | 91.181 | 53.959 | 62.519 | 0.00 | 0.00 |
| ATOM 20097 | 2HD1 | LEU | 1346 | 91.145 | 54.502 | 60.841 | 0.00 | 0.00 |
| ATOM 20098 | 3HD1 | LEU | 1346 | 90.820 | 55.623 | 62.297 | 0.00 | 0.00 |
| ATOM 20099 | CD2  | LEU | 1346 | 88.508 | 54.368 | 63.146 | 0.00 | 0.00 |
| ATOM 20100 | 1HD2 | LEU | 1346 | 89.118 | 53.908 | 63.923 | 0.00 | 0.00 |
| ATOM 20101 | 2HD2 | LEU | 1346 | 88.422 | 55.432 | 63.369 | 0.00 | 0.00 |
| ATOM 20102 | 3HD2 | LEU | 1346 | 87.540 | 53.873 | 63.216 | 0.00 | 0.00 |
| ATOM 20103 | C    | LEU | 1346 | 88.770 | 53.329 | 58.839 | 0.00 | 0.00 |
| ATOM 20104 | O    | LEU | 1346 | 89.738 | 52.738 | 58.457 | 0.00 | 0.00 |
| ATOM 20105 | N    | ARG | 1347 | 87.609 | 52.628 | 58.998 | 0.00 | 0.00 |
| ATOM 20106 | H    | ARG | 1347 | 86.767 | 53.108 | 59.281 | 0.00 | 0.00 |
| ATOM 20107 | CA   | ARG | 1347 | 87.501 | 51.241 | 58.560 | 0.00 | 0.00 |
| ATOM 20108 | HA   | ARG | 1347 | 88.248 | 50.670 | 59.112 | 0.00 | 0.00 |
| ATOM 20109 | CB   | ARG | 1347 | 86.098 | 50.722 | 58.993 | 0.00 | 0.00 |
| ATOM 20110 | HB2  | ARG | 1347 | 85.382 | 51.471 | 58.654 | 0.00 | 0.00 |
| ATOM 20111 | HB3  | ARG | 1347 | 85.878 | 49.755 | 58.542 | 0.00 | 0.00 |
| ATOM 20112 | CG   | ARG | 1347 | 85.953 | 50.468 | 60.460 | 0.00 | 0.00 |
| ATOM 20113 | HG2  | ARG | 1347 | 86.694 | 49.707 | 60.705 | 0.00 | 0.00 |
| ATOM 20114 | HG3  | ARG | 1347 | 86.113 | 51.385 | 61.027 | 0.00 | 0.00 |
| ATOM 20115 | CD   | ARG | 1347 | 84.614 | 49.805 | 60.762 | 0.00 | 0.00 |
| ATOM 20116 | HD2  | ARG | 1347 | 83.871 | 50.578 | 60.566 | 0.00 | 0.00 |
| ATOM 20117 | HD3  | ARG | 1347 | 84.398 | 48.954 | 60.116 | 0.00 | 0.00 |
| ATOM 20118 | NE   | ARG | 1347 | 84.601 | 49.512 | 62.130 | 0.00 | 0.00 |
| ATOM 20119 | HE   | ARG | 1347 | 84.482 | 50.326 | 62.715 | 0.00 | 0.00 |

|      |       |      |     |      |        |        |        |      |      |
|------|-------|------|-----|------|--------|--------|--------|------|------|
| ATOM | 20120 | CZ   | ARG | 1347 | 85.051 | 48.418 | 62.776 | 0.00 | 0.00 |
| ATOM | 20121 | NH1  | ARG | 1347 | 85.415 | 47.388 | 62.214 | 0.00 | 0.00 |
| ATOM | 20122 | 1HH1 | ARG | 1347 | 85.989 | 46.847 | 62.845 | 0.00 | 0.00 |
| ATOM | 20123 | 2HH1 | ARG | 1347 | 85.482 | 47.421 | 61.206 | 0.00 | 0.00 |
| ATOM | 20124 | NH2  | ARG | 1347 | 85.037 | 48.351 | 64.058 | 0.00 | 0.00 |
| ATOM | 20125 | 1HH2 | ARG | 1347 | 85.605 | 47.631 | 64.481 | 0.00 | 0.00 |
| ATOM | 20126 | 2HH2 | ARG | 1347 | 84.614 | 49.118 | 64.561 | 0.00 | 0.00 |
| ATOM | 20127 | C    | ARG | 1347 | 87.613 | 50.898 | 57.134 | 0.00 | 0.00 |
| ATOM | 20128 | O    | ARG | 1347 | 88.015 | 49.782 | 56.841 | 0.00 | 0.00 |
| ATOM | 20129 | N    | THR | 1348 | 87.280 | 51.791 | 56.261 | 0.00 | 0.00 |
| ATOM | 20130 | H    | THR | 1348 | 86.724 | 52.589 | 56.534 | 0.00 | 0.00 |
| ATOM | 20131 | CA   | THR | 1348 | 87.710 | 51.578 | 54.825 | 0.00 | 0.00 |
| ATOM | 20132 | HA   | THR | 1348 | 87.465 | 50.579 | 54.466 | 0.00 | 0.00 |
| ATOM | 20133 | CB   | THR | 1348 | 87.067 | 52.666 | 53.934 | 0.00 | 0.00 |
| ATOM | 20134 | HB   | THR | 1348 | 87.235 | 53.646 | 54.382 | 0.00 | 0.00 |
| ATOM | 20135 | CG2  | THR | 1348 | 87.414 | 52.523 | 52.434 | 0.00 | 0.00 |
| ATOM | 20136 | 1HG2 | THR | 1348 | 86.881 | 53.296 | 51.880 | 0.00 | 0.00 |
| ATOM | 20137 | 2HG2 | THR | 1348 | 88.468 | 52.789 | 52.356 | 0.00 | 0.00 |
| ATOM | 20138 | 3HG2 | THR | 1348 | 87.325 | 51.470 | 52.168 | 0.00 | 0.00 |
| ATOM | 20139 | OG1  | THR | 1348 | 85.741 | 52.422 | 53.946 | 0.00 | 0.00 |
| ATOM | 20140 | HG1  | THR | 1348 | 85.425 | 52.864 | 54.737 | 0.00 | 0.00 |
| ATOM | 20141 | C    | THR | 1348 | 89.233 | 51.597 | 54.686 | 0.00 | 0.00 |
| ATOM | 20142 | O    | THR | 1348 | 89.830 | 50.839 | 53.844 | 0.00 | 0.00 |
| ATOM | 20143 | N    | TRP | 1349 | 89.938 | 52.431 | 55.453 | 0.00 | 0.00 |
| ATOM | 20144 | H    | TRP | 1349 | 89.403 | 52.922 | 56.154 | 0.00 | 0.00 |
| ATOM | 20145 | CA   | TRP | 1349 | 91.380 | 52.594 | 55.356 | 0.00 | 0.00 |

|      |       |     |     |      |        |        |        |      |      |
|------|-------|-----|-----|------|--------|--------|--------|------|------|
| ATOM | 20146 | HA  | TRP | 1349 | 91.674 | 52.409 | 54.322 | 0.00 | 0.00 |
| ATOM | 20147 | CB  | TRP | 1349 | 92.056 | 53.898 | 55.646 | 0.00 | 0.00 |
| ATOM | 20148 | HB2 | TRP | 1349 | 92.017 | 54.123 | 56.711 | 0.00 | 0.00 |
| ATOM | 20149 | HB3 | TRP | 1349 | 93.066 | 53.691 | 55.291 | 0.00 | 0.00 |
| ATOM | 20150 | CG  | TRP | 1349 | 91.693 | 55.009 | 54.781 | 0.00 | 0.00 |
| ATOM | 20151 | CD1 | TRP | 1349 | 91.088 | 56.141 | 55.068 | 0.00 | 0.00 |
| ATOM | 20152 | HD1 | TRP | 1349 | 90.574 | 56.278 | 56.008 | 0.00 | 0.00 |
| ATOM | 20153 | NE1 | TRP | 1349 | 90.853 | 56.897 | 53.945 | 0.00 | 0.00 |
| ATOM | 20154 | HE1 | TRP | 1349 | 90.165 | 57.629 | 54.048 | 0.00 | 0.00 |
| ATOM | 20155 | CE2 | TRP | 1349 | 91.418 | 56.283 | 52.830 | 0.00 | 0.00 |
| ATOM | 20156 | CZ2 | TRP | 1349 | 91.465 | 56.619 | 51.434 | 0.00 | 0.00 |
| ATOM | 20157 | HZ2 | TRP | 1349 | 91.073 | 57.566 | 51.093 | 0.00 | 0.00 |
| ATOM | 20158 | CH2 | TRP | 1349 | 92.037 | 55.702 | 50.595 | 0.00 | 0.00 |
| ATOM | 20159 | HH2 | TRP | 1349 | 91.952 | 55.867 | 49.531 | 0.00 | 0.00 |
| ATOM | 20160 | CZ3 | TRP | 1349 | 92.610 | 54.513 | 51.089 | 0.00 | 0.00 |
| ATOM | 20161 | HZ3 | TRP | 1349 | 92.969 | 53.769 | 50.393 | 0.00 | 0.00 |
| ATOM | 20162 | CE3 | TRP | 1349 | 92.593 | 54.192 | 52.453 | 0.00 | 0.00 |
| ATOM | 20163 | HE3 | TRP | 1349 | 92.842 | 53.179 | 52.732 | 0.00 | 0.00 |
| ATOM | 20164 | CD2 | TRP | 1349 | 91.996 | 55.076 | 53.387 | 0.00 | 0.00 |
| ATOM | 20165 | C   | TRP | 1349 | 92.009 | 51.391 | 56.057 | 0.00 | 0.00 |
| ATOM | 20166 | O   | TRP | 1349 | 93.035 | 50.918 | 55.573 | 0.00 | 0.00 |
| ATOM | 20167 | N   | GLN | 1350 | 91.490 | 50.854 | 57.146 | 0.00 | 0.00 |
| ATOM | 20168 | H   | GLN | 1350 | 90.721 | 51.276 | 57.646 | 0.00 | 0.00 |
| ATOM | 20169 | CA  | GLN | 1350 | 92.164 | 49.696 | 57.842 | 0.00 | 0.00 |
| ATOM | 20170 | HA  | GLN | 1350 | 93.222 | 49.946 | 57.920 | 0.00 | 0.00 |
| ATOM | 20171 | CB  | GLN | 1350 | 91.448 | 49.361 | 59.188 | 0.00 | 0.00 |

|            |      |     |      |        |        |        |      |      |
|------------|------|-----|------|--------|--------|--------|------|------|
| ATOM 20172 | HB2  | GLN | 1350 | 90.384 | 49.305 | 58.962 | 0.00 | 0.00 |
| ATOM 20173 | HB3  | GLN | 1350 | 91.701 | 48.348 | 59.502 | 0.00 | 0.00 |
| ATOM 20174 | CG   | GLN | 1350 | 91.699 | 50.222 | 60.380 | 0.00 | 0.00 |
| ATOM 20175 | HG2  | GLN | 1350 | 91.290 | 51.217 | 60.205 | 0.00 | 0.00 |
| ATOM 20176 | HG3  | GLN | 1350 | 91.117 | 49.736 | 61.163 | 0.00 | 0.00 |
| ATOM 20177 | CD   | GLN | 1350 | 93.106 | 50.517 | 60.868 | 0.00 | 0.00 |
| ATOM 20178 | OE1  | GLN | 1350 | 93.943 | 50.868 | 60.076 | 0.00 | 0.00 |
| ATOM 20179 | NE2  | GLN | 1350 | 93.424 | 50.506 | 62.102 | 0.00 | 0.00 |
| ATOM 20180 | 1HE2 | GLN | 1350 | 94.405 | 50.664 | 62.282 | 0.00 | 0.00 |
| ATOM 20181 | 2HE2 | GLN | 1350 | 92.822 | 50.321 | 62.892 | 0.00 | 0.00 |
| ATOM 20182 | C    | GLN | 1350 | 92.089 | 48.362 | 57.046 | 0.00 | 0.00 |
| ATOM 20183 | O    | GLN | 1350 | 92.989 | 47.582 | 57.118 | 0.00 | 0.00 |
| ATOM 20184 | N    | VAL | 1351 | 91.047 | 48.129 | 56.281 | 0.00 | 0.00 |
| ATOM 20185 | H    | VAL | 1351 | 90.384 | 48.891 | 56.273 | 0.00 | 0.00 |
| ATOM 20186 | CA   | VAL | 1351 | 90.895 | 47.104 | 55.282 | 0.00 | 0.00 |
| ATOM 20187 | HA   | VAL | 1351 | 91.053 | 46.139 | 55.764 | 0.00 | 0.00 |
| ATOM 20188 | CB   | VAL | 1351 | 89.494 | 47.128 | 54.612 | 0.00 | 0.00 |
| ATOM 20189 | HB   | VAL | 1351 | 89.335 | 48.159 | 54.298 | 0.00 | 0.00 |
| ATOM 20190 | CG1  | VAL | 1351 | 89.245 | 46.128 | 53.475 | 0.00 | 0.00 |
| ATOM 20191 | 1HG1 | VAL | 1351 | 89.270 | 45.126 | 53.901 | 0.00 | 0.00 |
| ATOM 20192 | 2HG1 | VAL | 1351 | 88.335 | 46.518 | 53.018 | 0.00 | 0.00 |
| ATOM 20193 | 3HG1 | VAL | 1351 | 90.013 | 46.300 | 52.721 | 0.00 | 0.00 |
| ATOM 20194 | CG2  | VAL | 1351 | 88.494 | 46.866 | 55.719 | 0.00 | 0.00 |
| ATOM 20195 | 1HG2 | VAL | 1351 | 88.696 | 45.924 | 56.228 | 0.00 | 0.00 |
| ATOM 20196 | 2HG2 | VAL | 1351 | 88.515 | 47.588 | 56.535 | 0.00 | 0.00 |
| ATOM 20197 | 3HG2 | VAL | 1351 | 87.475 | 46.736 | 55.353 | 0.00 | 0.00 |

|      |       |     |     |      |         |        |        |      |      |
|------|-------|-----|-----|------|---------|--------|--------|------|------|
| ATOM | 20198 | C   | VAL | 1351 | 91.968  | 47.352 | 54.265 | 0.00 | 0.00 |
| ATOM | 20199 | O   | VAL | 1351 | 92.730  | 46.342 | 54.067 | 0.00 | 0.00 |
| ATOM | 20200 | N   | ALA | 1352 | 92.226  | 48.500 | 53.629 | 0.00 | 0.00 |
| ATOM | 20201 | H   | ALA | 1352 | 91.769  | 49.339 | 53.956 | 0.00 | 0.00 |
| ATOM | 20202 | CA  | ALA | 1352 | 93.305  | 48.658 | 52.713 | 0.00 | 0.00 |
| ATOM | 20203 | HA  | ALA | 1352 | 93.159  | 48.003 | 51.855 | 0.00 | 0.00 |
| ATOM | 20204 | CB  | ALA | 1352 | 93.335  | 50.117 | 52.199 | 0.00 | 0.00 |
| ATOM | 20205 | HB1 | ALA | 1352 | 93.579  | 50.761 | 53.044 | 0.00 | 0.00 |
| ATOM | 20206 | HB2 | ALA | 1352 | 94.116  | 50.238 | 51.448 | 0.00 | 0.00 |
| ATOM | 20207 | HB3 | ALA | 1352 | 92.390  | 50.534 | 51.851 | 0.00 | 0.00 |
| ATOM | 20208 | C   | ALA | 1352 | 94.681  | 48.328 | 53.366 | 0.00 | 0.00 |
| ATOM | 20209 | O   | ALA | 1352 | 95.447  | 47.545 | 52.747 | 0.00 | 0.00 |
| ATOM | 20210 | N   | HIE | 1353 | 94.930  | 48.747 | 54.606 | 0.00 | 0.00 |
| ATOM | 20211 | H   | HIE | 1353 | 94.205  | 49.252 | 55.095 | 0.00 | 0.00 |
| ATOM | 20212 | CA  | HIE | 1353 | 96.117  | 48.319 | 55.389 | 0.00 | 0.00 |
| ATOM | 20213 | HA  | HIE | 1353 | 97.032  | 48.541 | 54.840 | 0.00 | 0.00 |
| ATOM | 20214 | CB  | HIE | 1353 | 96.294  | 49.032 | 56.655 | 0.00 | 0.00 |
| ATOM | 20215 | HB2 | HIE | 1353 | 96.408  | 50.111 | 56.548 | 0.00 | 0.00 |
| ATOM | 20216 | HB3 | HIE | 1353 | 95.407  | 48.940 | 57.281 | 0.00 | 0.00 |
| ATOM | 20217 | CG  | HIE | 1353 | 97.516  | 48.572 | 57.493 | 0.00 | 0.00 |
| ATOM | 20218 | ND1 | HIE | 1353 | 98.819  | 48.980 | 57.342 | 0.00 | 0.00 |
| ATOM | 20219 | CE1 | HIE | 1353 | 99.457  | 48.172 | 58.246 | 0.00 | 0.00 |
| ATOM | 20220 | HE1 | HIE | 1353 | 100.521 | 48.220 | 58.425 | 0.00 | 0.00 |
| ATOM | 20221 | NE2 | HIE | 1353 | 98.569  | 47.398 | 58.911 | 0.00 | 0.00 |
| ATOM | 20222 | HE2 | HIE | 1353 | 98.872  | 46.607 | 59.460 | 0.00 | 0.00 |
| ATOM | 20223 | CD2 | HIE | 1353 | 97.306  | 47.626 | 58.421 | 0.00 | 0.00 |

|      |       |      |     |      |        |        |        |      |      |
|------|-------|------|-----|------|--------|--------|--------|------|------|
| ATOM | 20224 | HD2  | HIE | 1353 | 96.354 | 47.245 | 58.760 | 0.00 | 0.00 |
| ATOM | 20225 | C    | HIE | 1353 | 96.179 | 46.819 | 55.564 | 0.00 | 0.00 |
| ATOM | 20226 | O    | HIE | 1353 | 97.171 | 46.239 | 55.210 | 0.00 | 0.00 |
| ATOM | 20227 | N    | ARG | 1354 | 95.084 | 46.168 | 56.081 | 0.00 | 0.00 |
| ATOM | 20228 | H    | ARG | 1354 | 94.313 | 46.726 | 56.418 | 0.00 | 0.00 |
| ATOM | 20229 | CA   | ARG | 1354 | 94.954 | 44.731 | 56.237 | 0.00 | 0.00 |
| ATOM | 20230 | HA   | ARG | 1354 | 95.695 | 44.464 | 56.991 | 0.00 | 0.00 |
| ATOM | 20231 | CB   | ARG | 1354 | 93.713 | 44.297 | 56.939 | 0.00 | 0.00 |
| ATOM | 20232 | HB2  | ARG | 1354 | 93.553 | 44.877 | 57.848 | 0.00 | 0.00 |
| ATOM | 20233 | HB3  | ARG | 1354 | 92.880 | 44.591 | 56.301 | 0.00 | 0.00 |
| ATOM | 20234 | CG   | ARG | 1354 | 93.595 | 42.784 | 57.396 | 0.00 | 0.00 |
| ATOM | 20235 | HG2  | ARG | 1354 | 94.556 | 42.328 | 57.638 | 0.00 | 0.00 |
| ATOM | 20236 | HG3  | ARG | 1354 | 92.833 | 42.628 | 58.159 | 0.00 | 0.00 |
| ATOM | 20237 | CD   | ARG | 1354 | 93.014 | 41.931 | 56.240 | 0.00 | 0.00 |
| ATOM | 20238 | HD2  | ARG | 1354 | 92.683 | 42.477 | 55.357 | 0.00 | 0.00 |
| ATOM | 20239 | HD3  | ARG | 1354 | 93.647 | 41.055 | 56.096 | 0.00 | 0.00 |
| ATOM | 20240 | NE   | ARG | 1354 | 91.767 | 41.314 | 56.700 | 0.00 | 0.00 |
| ATOM | 20241 | HE   | ARG | 1354 | 90.884 | 41.452 | 56.229 | 0.00 | 0.00 |
| ATOM | 20242 | CZ   | ARG | 1354 | 91.682 | 40.239 | 57.432 | 0.00 | 0.00 |
| ATOM | 20243 | NH1  | ARG | 1354 | 92.697 | 39.680 | 58.051 | 0.00 | 0.00 |
| ATOM | 20244 | 1HH1 | ARG | 1354 | 92.494 | 38.820 | 58.540 | 0.00 | 0.00 |
| ATOM | 20245 | 2HH1 | ARG | 1354 | 93.653 | 40.004 | 58.014 | 0.00 | 0.00 |
| ATOM | 20246 | NH2  | ARG | 1354 | 90.574 | 39.746 | 57.695 | 0.00 | 0.00 |
| ATOM | 20247 | 1HH2 | ARG | 1354 | 90.472 | 38.974 | 58.338 | 0.00 | 0.00 |
| ATOM | 20248 | 2HH2 | ARG | 1354 | 89.811 | 40.167 | 57.184 | 0.00 | 0.00 |
| ATOM | 20249 | C    | ARG | 1354 | 95.272 | 43.843 | 55.019 | 0.00 | 0.00 |

|      |       |     |     |      |         |        |        |      |      |
|------|-------|-----|-----|------|---------|--------|--------|------|------|
| ATOM | 20250 | O   | ARG | 1354 | 96.001  | 42.865 | 55.181 | 0.00 | 0.00 |
| ATOM | 20251 | N   | MET | 1355 | 94.826  | 44.337 | 53.832 | 0.00 | 0.00 |
| ATOM | 20252 | H   | MET | 1355 | 94.156  | 45.083 | 53.948 | 0.00 | 0.00 |
| ATOM | 20253 | CA  | MET | 1355 | 95.139  | 43.831 | 52.549 | 0.00 | 0.00 |
| ATOM | 20254 | HA  | MET | 1355 | 95.107  | 42.741 | 52.571 | 0.00 | 0.00 |
| ATOM | 20255 | CB  | MET | 1355 | 94.114  | 44.381 | 51.544 | 0.00 | 0.00 |
| ATOM | 20256 | HB2 | MET | 1355 | 94.305  | 45.450 | 51.633 | 0.00 | 0.00 |
| ATOM | 20257 | HB3 | MET | 1355 | 94.237  | 43.923 | 50.562 | 0.00 | 0.00 |
| ATOM | 20258 | CG  | MET | 1355 | 92.756  | 43.946 | 51.991 | 0.00 | 0.00 |
| ATOM | 20259 | HG2 | MET | 1355 | 92.482  | 44.272 | 52.994 | 0.00 | 0.00 |
| ATOM | 20260 | HG3 | MET | 1355 | 92.039  | 44.418 | 51.319 | 0.00 | 0.00 |
| ATOM | 20261 | SD  | MET | 1355 | 92.365  | 42.163 | 51.973 | 0.00 | 0.00 |
| ATOM | 20262 | CE  | MET | 1355 | 90.972  | 41.931 | 53.066 | 0.00 | 0.00 |
| ATOM | 20263 | HE1 | MET | 1355 | 91.205  | 42.325 | 54.055 | 0.00 | 0.00 |
| ATOM | 20264 | HE2 | MET | 1355 | 90.047  | 42.396 | 52.726 | 0.00 | 0.00 |
| ATOM | 20265 | HE3 | MET | 1355 | 90.757  | 40.863 | 53.106 | 0.00 | 0.00 |
| ATOM | 20266 | C   | MET | 1355 | 96.606  | 43.974 | 52.132 | 0.00 | 0.00 |
| ATOM | 20267 | O   | MET | 1355 | 97.143  | 42.974 | 51.650 | 0.00 | 0.00 |
| ATOM | 20268 | N   | LYS | 1356 | 97.211  | 45.146 | 52.276 | 0.00 | 0.00 |
| ATOM | 20269 | H   | LYS | 1356 | 96.849  | 45.713 | 53.030 | 0.00 | 0.00 |
| ATOM | 20270 | CA  | LYS | 1356 | 98.583  | 45.339 | 51.892 | 0.00 | 0.00 |
| ATOM | 20271 | HA  | LYS | 1356 | 98.633  | 45.203 | 50.812 | 0.00 | 0.00 |
| ATOM | 20272 | CB  | LYS | 1356 | 98.989  | 46.757 | 52.178 | 0.00 | 0.00 |
| ATOM | 20273 | HB2 | LYS | 1356 | 98.261  | 47.445 | 51.749 | 0.00 | 0.00 |
| ATOM | 20274 | HB3 | LYS | 1356 | 99.052  | 47.045 | 53.227 | 0.00 | 0.00 |
| ATOM | 20275 | CG  | LYS | 1356 | 100.269 | 47.205 | 51.455 | 0.00 | 0.00 |

|      |       |      |     |      |         |        |        |      |      |
|------|-------|------|-----|------|---------|--------|--------|------|------|
| ATOM | 20276 | HG2  | LYS | 1356 | 100.376 | 46.527 | 50.608 | 0.00 | 0.00 |
| ATOM | 20277 | HG3  | LYS | 1356 | 100.164 | 48.213 | 51.056 | 0.00 | 0.00 |
| ATOM | 20278 | CD   | LYS | 1356 | 101.615 | 47.149 | 52.163 | 0.00 | 0.00 |
| ATOM | 20279 | HD2  | LYS | 1356 | 101.542 | 47.832 | 53.009 | 0.00 | 0.00 |
| ATOM | 20280 | HD3  | LYS | 1356 | 101.845 | 46.105 | 52.379 | 0.00 | 0.00 |
| ATOM | 20281 | CE   | LYS | 1356 | 102.744 | 47.664 | 51.319 | 0.00 | 0.00 |
| ATOM | 20282 | HE2  | LYS | 1356 | 103.678 | 47.297 | 51.745 | 0.00 | 0.00 |
| ATOM | 20283 | HE3  | LYS | 1356 | 102.654 | 47.129 | 50.374 | 0.00 | 0.00 |
| ATOM | 20284 | NZ   | LYS | 1356 | 102.766 | 49.151 | 51.286 | 0.00 | 0.00 |
| ATOM | 20285 | HZ1  | LYS | 1356 | 102.685 | 49.527 | 52.220 | 0.00 | 0.00 |
| ATOM | 20286 | HZ2  | LYS | 1356 | 103.607 | 49.506 | 50.855 | 0.00 | 0.00 |
| ATOM | 20287 | HZ3  | LYS | 1356 | 102.048 | 49.542 | 50.692 | 0.00 | 0.00 |
| ATOM | 20288 | C    | LYS | 1356 | 99.573  | 44.359 | 52.623 | 0.00 | 0.00 |
| ATOM | 20289 | O    | LYS | 1356 | 100.414 | 43.722 | 51.999 | 0.00 | 0.00 |
| ATOM | 20290 | N    | VAL | 1357 | 99.440  | 44.235 | 53.994 | 0.00 | 0.00 |
| ATOM | 20291 | H    | VAL | 1357 | 98.837  | 44.900 | 54.458 | 0.00 | 0.00 |
| ATOM | 20292 | CA   | VAL | 1357 | 100.406 | 43.513 | 54.809 | 0.00 | 0.00 |
| ATOM | 20293 | HA   | VAL | 1357 | 101.376 | 43.455 | 54.315 | 0.00 | 0.00 |
| ATOM | 20294 | CB   | VAL | 1357 | 100.558 | 44.277 | 56.134 | 0.00 | 0.00 |
| ATOM | 20295 | HB   | VAL | 1357 | 101.454 | 43.850 | 56.584 | 0.00 | 0.00 |
| ATOM | 20296 | CG1  | VAL | 1357 | 100.764 | 45.782 | 55.886 | 0.00 | 0.00 |
| ATOM | 20297 | 1HG1 | VAL | 1357 | 99.848  | 46.351 | 55.726 | 0.00 | 0.00 |
| ATOM | 20298 | 2HG1 | VAL | 1357 | 101.311 | 46.087 | 56.778 | 0.00 | 0.00 |
| ATOM | 20299 | 3HG1 | VAL | 1357 | 101.443 | 46.026 | 55.070 | 0.00 | 0.00 |
| ATOM | 20300 | CG2  | VAL | 1357 | 99.444  | 44.072 | 57.023 | 0.00 | 0.00 |
| ATOM | 20301 | 1HG2 | VAL | 1357 | 99.310  | 44.978 | 57.614 | 0.00 | 0.00 |



|      |       |      |     |      |         |        |        |      |      |
|------|-------|------|-----|------|---------|--------|--------|------|------|
| ATOM | 20302 | 2HG2 | VAL | 1357 | 98.545  | 43.934 | 56.421 | 0.00 | 0.00 |
| ATOM | 20303 | 3HG2 | VAL | 1357 | 99.670  | 43.251 | 57.702 | 0.00 | 0.00 |
| ATOM | 20304 | C    | VAL | 1357 | 99.966  | 42.051 | 54.973 | 0.00 | 0.00 |
| ATOM | 20305 | O    | VAL | 1357 | 100.702 | 41.368 | 55.592 | 0.00 | 0.00 |
| ATOM | 20306 | N    | GLN | 1358 | 98.878  | 41.543 | 54.335 | 0.00 | 0.00 |
| ATOM | 20307 | H    | GLN | 1358 | 98.268  | 42.181 | 53.845 | 0.00 | 0.00 |
| ATOM | 20308 | CA   | GLN | 1358 | 98.584  | 40.095 | 54.264 | 0.00 | 0.00 |
| ATOM | 20309 | HA   | GLN | 1358 | 99.377  | 39.453 | 54.646 | 0.00 | 0.00 |
| ATOM | 20310 | CB   | GLN | 1358 | 97.334  | 39.734 | 55.126 | 0.00 | 0.00 |
| ATOM | 20311 | HB2  | GLN | 1358 | 96.475  | 40.367 | 54.906 | 0.00 | 0.00 |
| ATOM | 20312 | HB3  | GLN | 1358 | 96.975  | 38.723 | 54.932 | 0.00 | 0.00 |
| ATOM | 20313 | CG   | GLN | 1358 | 97.624  | 39.997 | 56.643 | 0.00 | 0.00 |
| ATOM | 20314 | HG2  | GLN | 1358 | 98.467  | 39.392 | 56.977 | 0.00 | 0.00 |
| ATOM | 20315 | HG3  | GLN | 1358 | 97.875  | 41.055 | 56.716 | 0.00 | 0.00 |
| ATOM | 20316 | CD   | GLN | 1358 | 96.520  | 39.733 | 57.607 | 0.00 | 0.00 |
| ATOM | 20317 | OE1  | GLN | 1358 | 95.345  | 39.517 | 57.358 | 0.00 | 0.00 |
| ATOM | 20318 | NE2  | GLN | 1358 | 96.982  | 39.684 | 58.888 | 0.00 | 0.00 |
| ATOM | 20319 | 1HE2 | GLN | 1358 | 96.258  | 39.513 | 59.570 | 0.00 | 0.00 |
| ATOM | 20320 | 2HE2 | GLN | 1358 | 97.949  | 39.893 | 59.092 | 0.00 | 0.00 |
| ATOM | 20321 | C    | GLN | 1358 | 98.346  | 39.580 | 52.851 | 0.00 | 0.00 |
| ATOM | 20322 | O    | GLN | 1358 | 98.948  | 38.602 | 52.525 | 0.00 | 0.00 |
| ATOM | 20323 | N    | ARG | 1359 | 97.550  | 40.292 | 51.985 | 0.00 | 0.00 |
| ATOM | 20324 | H    | ARG | 1359 | 97.214  | 41.176 | 52.341 | 0.00 | 0.00 |
| ATOM | 20325 | CA   | ARG | 1359 | 97.244  | 40.004 | 50.574 | 0.00 | 0.00 |
| ATOM | 20326 | HA   | ARG | 1359 | 97.364  | 38.921 | 50.528 | 0.00 | 0.00 |
| ATOM | 20327 | CB   | ARG | 1359 | 95.834  | 40.504 | 50.267 | 0.00 | 0.00 |

|      |       |      |     |      |         |        |        |      |      |
|------|-------|------|-----|------|---------|--------|--------|------|------|
| ATOM | 20328 | HB2  | ARG | 1359 | 95.213  | 40.562 | 51.161 | 0.00 | 0.00 |
| ATOM | 20329 | HB3  | ARG | 1359 | 95.884  | 41.489 | 49.805 | 0.00 | 0.00 |
| ATOM | 20330 | CG   | ARG | 1359 | 95.095  | 39.439 | 49.344 | 0.00 | 0.00 |
| ATOM | 20331 | HG2  | ARG | 1359 | 95.775  | 39.342 | 48.497 | 0.00 | 0.00 |
| ATOM | 20332 | HG3  | ARG | 1359 | 95.032  | 38.505 | 49.901 | 0.00 | 0.00 |
| ATOM | 20333 | CD   | ARG | 1359 | 93.651  | 39.700 | 48.988 | 0.00 | 0.00 |
| ATOM | 20334 | HD2  | ARG | 1359 | 93.296  | 38.688 | 48.793 | 0.00 | 0.00 |
| ATOM | 20335 | HD3  | ARG | 1359 | 93.099  | 40.064 | 49.855 | 0.00 | 0.00 |
| ATOM | 20336 | NE   | ARG | 1359 | 93.395  | 40.678 | 47.925 | 0.00 | 0.00 |
| ATOM | 20337 | HE   | ARG | 1359 | 93.440  | 41.649 | 48.200 | 0.00 | 0.00 |
| ATOM | 20338 | CZ   | ARG | 1359 | 92.996  | 40.352 | 46.689 | 0.00 | 0.00 |
| ATOM | 20339 | NH1  | ARG | 1359 | 93.170  | 39.160 | 46.240 | 0.00 | 0.00 |
| ATOM | 20340 | 1HH1 | ARG | 1359 | 93.069  | 38.957 | 45.256 | 0.00 | 0.00 |
| ATOM | 20341 | 2HH1 | ARG | 1359 | 93.584  | 38.432 | 46.804 | 0.00 | 0.00 |
| ATOM | 20342 | NH2  | ARG | 1359 | 92.658  | 41.294 | 45.838 | 0.00 | 0.00 |
| ATOM | 20343 | 1HH2 | ARG | 1359 | 92.497  | 41.021 | 44.879 | 0.00 | 0.00 |
| ATOM | 20344 | 2HH2 | ARG | 1359 | 92.593  | 42.265 | 46.111 | 0.00 | 0.00 |
| ATOM | 20345 | C    | ARG | 1359 | 98.200  | 40.526 | 49.518 | 0.00 | 0.00 |
| ATOM | 20346 | O    | ARG | 1359 | 98.113  | 40.132 | 48.347 | 0.00 | 0.00 |
| ATOM | 20347 | N    | GLY | 1360 | 99.159  | 41.413 | 49.949 | 0.00 | 0.00 |
| ATOM | 20348 | H    | GLY | 1360 | 99.063  | 41.824 | 50.866 | 0.00 | 0.00 |
| ATOM | 20349 | CA   | GLY | 1360 | 100.108 | 42.123 | 49.073 | 0.00 | 0.00 |
| ATOM | 20350 | HA2  | GLY | 1360 | 100.561 | 42.969 | 49.589 | 0.00 | 0.00 |
| ATOM | 20351 | HA3  | GLY | 1360 | 100.858 | 41.516 | 48.565 | 0.00 | 0.00 |
| ATOM | 20352 | C    | GLY | 1360 | 99.462  | 42.951 | 47.944 | 0.00 | 0.00 |
| ATOM | 20353 | O    | GLY | 1360 | 98.569  | 43.778 | 48.083 | 0.00 | 0.00 |

|      |       |      |     |      |         |        |        |      |      |
|------|-------|------|-----|------|---------|--------|--------|------|------|
| ATOM | 20354 | N    | ALA | 1361 | 100.009 | 42.674 | 46.740 | 0.00 | 0.00 |
| ATOM | 20355 | H    | ALA | 1361 | 100.663 | 41.906 | 46.770 | 0.00 | 0.00 |
| ATOM | 20356 | CA   | ALA | 1361 | 99.928  | 43.561 | 45.640 | 0.00 | 0.00 |
| ATOM | 20357 | HA   | ALA | 1361 | 100.110 | 44.542 | 46.078 | 0.00 | 0.00 |
| ATOM | 20358 | CB   | ALA | 1361 | 101.057 | 43.305 | 44.669 | 0.00 | 0.00 |
| ATOM | 20359 | HB1  | ALA | 1361 | 100.744 | 42.398 | 44.152 | 0.00 | 0.00 |
| ATOM | 20360 | HB2  | ALA | 1361 | 101.138 | 44.154 | 43.990 | 0.00 | 0.00 |
| ATOM | 20361 | HB3  | ALA | 1361 | 101.935 | 43.131 | 45.291 | 0.00 | 0.00 |
| ATOM | 20362 | C    | ALA | 1361 | 98.563  | 43.448 | 44.933 | 0.00 | 0.00 |
| ATOM | 20363 | O    | ALA | 1361 | 98.006  | 42.337 | 44.824 | 0.00 | 0.00 |
| ATOM | 20364 | N    | LEU | 1362 | 98.226  | 44.626 | 44.419 | 0.00 | 0.00 |
| ATOM | 20365 | H    | LEU | 1362 | 98.775  | 45.453 | 44.605 | 0.00 | 0.00 |
| ATOM | 20366 | CA   | LEU | 1362 | 96.951  | 44.785 | 43.764 | 0.00 | 0.00 |
| ATOM | 20367 | HA   | LEU | 1362 | 96.445  | 43.837 | 43.584 | 0.00 | 0.00 |
| ATOM | 20368 | CB   | LEU | 1362 | 96.059  | 45.663 | 44.668 | 0.00 | 0.00 |
| ATOM | 20369 | HB2  | LEU | 1362 | 96.212  | 45.457 | 45.728 | 0.00 | 0.00 |
| ATOM | 20370 | HB3  | LEU | 1362 | 96.242  | 46.721 | 44.478 | 0.00 | 0.00 |
| ATOM | 20371 | CG   | LEU | 1362 | 94.497  | 45.532 | 44.482 | 0.00 | 0.00 |
| ATOM | 20372 | HG   | LEU | 1362 | 94.209  | 45.846 | 43.478 | 0.00 | 0.00 |
| ATOM | 20373 | CD1  | LEU | 1362 | 93.981  | 44.110 | 44.598 | 0.00 | 0.00 |
| ATOM | 20374 | 1HD1 | LEU | 1362 | 94.411  | 43.644 | 43.711 | 0.00 | 0.00 |
| ATOM | 20375 | 2HD1 | LEU | 1362 | 94.330  | 43.588 | 45.489 | 0.00 | 0.00 |
| ATOM | 20376 | 3HD1 | LEU | 1362 | 92.915  | 44.024 | 44.387 | 0.00 | 0.00 |
| ATOM | 20377 | CD2  | LEU | 1362 | 93.745  | 46.527 | 45.406 | 0.00 | 0.00 |
| ATOM | 20378 | 1HD2 | LEU | 1362 | 92.696  | 46.421 | 45.131 | 0.00 | 0.00 |
| ATOM | 20379 | 2HD2 | LEU | 1362 | 93.960  | 46.474 | 46.474 | 0.00 | 0.00 |

|      |       |      |     |      |         |        |        |      |      |
|------|-------|------|-----|------|---------|--------|--------|------|------|
| ATOM | 20380 | 3HD2 | LEU | 1362 | 94.031  | 47.508 | 45.026 | 0.00 | 0.00 |
| ATOM | 20381 | C    | LEU | 1362 | 96.936  | 45.451 | 42.398 | 0.00 | 0.00 |
| ATOM | 20382 | O    | LEU | 1362 | 95.962  | 45.420 | 41.570 | 0.00 | 0.00 |
| ATOM | 20383 | N    | ALA | 1363 | 97.983  | 46.218 | 42.104 | 0.00 | 0.00 |
| ATOM | 20384 | H    | ALA | 1363 | 98.778  | 46.205 | 42.726 | 0.00 | 0.00 |
| ATOM | 20385 | CA   | ALA | 1363 | 98.310  | 46.934 | 40.900 | 0.00 | 0.00 |
| ATOM | 20386 | HA   | ALA | 1363 | 97.450  | 47.546 | 40.626 | 0.00 | 0.00 |
| ATOM | 20387 | CB   | ALA | 1363 | 99.446  | 47.861 | 41.222 | 0.00 | 0.00 |
| ATOM | 20388 | HB1  | ALA | 1363 | 99.812  | 48.392 | 40.343 | 0.00 | 0.00 |
| ATOM | 20389 | HB2  | ALA | 1363 | 99.172  | 48.571 | 42.002 | 0.00 | 0.00 |
| ATOM | 20390 | HB3  | ALA | 1363 | 100.337 | 47.328 | 41.555 | 0.00 | 0.00 |
| ATOM | 20391 | C    | ALA | 1363 | 98.643  | 46.041 | 39.707 | 0.00 | 0.00 |
| ATOM | 20392 | O    | ALA | 1363 | 99.139  | 44.941 | 39.778 | 0.00 | 0.00 |
| ATOM | 20393 | N    | GLU | 1364 | 98.445  | 46.595 | 38.456 | 0.00 | 0.00 |
| ATOM | 20394 | H    | GLU | 1364 | 98.101  | 47.544 | 38.481 | 0.00 | 0.00 |
| ATOM | 20395 | CA   | GLU | 1364 | 98.688  | 46.017 | 37.124 | 0.00 | 0.00 |
| ATOM | 20396 | HA   | GLU | 1364 | 98.443  | 44.959 | 37.030 | 0.00 | 0.00 |
| ATOM | 20397 | CB   | GLU | 1364 | 97.790  | 46.740 | 36.036 | 0.00 | 0.00 |
| ATOM | 20398 | HB2  | GLU | 1364 | 97.987  | 47.805 | 36.154 | 0.00 | 0.00 |
| ATOM | 20399 | HB3  | GLU | 1364 | 97.983  | 46.465 | 34.999 | 0.00 | 0.00 |
| ATOM | 20400 | CG   | GLU | 1364 | 96.289  | 46.567 | 36.311 | 0.00 | 0.00 |
| ATOM | 20401 | HG2  | GLU | 1364 | 95.958  | 45.551 | 36.096 | 0.00 | 0.00 |
| ATOM | 20402 | HG3  | GLU | 1364 | 95.997  | 46.772 | 37.341 | 0.00 | 0.00 |
| ATOM | 20403 | CD   | GLU | 1364 | 95.464  | 47.521 | 35.452 | 0.00 | 0.00 |
| ATOM | 20404 | OE1  | GLU | 1364 | 95.977  | 48.465 | 34.813 | 0.00 | 0.00 |
| ATOM | 20405 | OE2  | GLU | 1364 | 94.257  | 47.264 | 35.466 | 0.00 | 0.00 |

|      |       |      |     |      |         |        |        |      |      |
|------|-------|------|-----|------|---------|--------|--------|------|------|
| ATOM | 20406 | C    | GLU | 1364 | 100.192 | 46.080 | 36.762 | 0.00 | 0.00 |
| ATOM | 20407 | O    | GLU | 1364 | 100.665 | 45.676 | 35.671 | 0.00 | 0.00 |
| ATOM | 20408 | N    | GLU | 1365 | 100.941 | 46.842 | 37.620 | 0.00 | 0.00 |
| ATOM | 20409 | H    | GLU | 1365 | 100.490 | 47.167 | 38.464 | 0.00 | 0.00 |
| ATOM | 20410 | CA   | GLU | 1365 | 102.382 | 47.183 | 37.322 | 0.00 | 0.00 |
| ATOM | 20411 | HA   | GLU | 1365 | 102.813 | 46.666 | 36.465 | 0.00 | 0.00 |
| ATOM | 20412 | CB   | GLU | 1365 | 102.495 | 48.707 | 36.977 | 0.00 | 0.00 |
| ATOM | 20413 | HB2  | GLU | 1365 | 103.497 | 48.749 | 36.551 | 0.00 | 0.00 |
| ATOM | 20414 | HB3  | GLU | 1365 | 101.836 | 49.062 | 36.184 | 0.00 | 0.00 |
| ATOM | 20415 | CG   | GLU | 1365 | 102.273 | 49.737 | 38.116 | 0.00 | 0.00 |
| ATOM | 20416 | HG2  | GLU | 1365 | 101.397 | 49.428 | 38.687 | 0.00 | 0.00 |
| ATOM | 20417 | HG3  | GLU | 1365 | 103.095 | 49.458 | 38.775 | 0.00 | 0.00 |
| ATOM | 20418 | CD   | GLU | 1365 | 102.160 | 51.234 | 37.777 | 0.00 | 0.00 |
| ATOM | 20419 | OE1  | GLU | 1365 | 101.254 | 51.747 | 37.071 | 0.00 | 0.00 |
| ATOM | 20420 | OE2  | GLU | 1365 | 103.035 | 51.962 | 38.152 | 0.00 | 0.00 |
| ATOM | 20421 | C    | GLU | 1365 | 103.231 | 46.811 | 38.481 | 0.00 | 0.00 |
| ATOM | 20422 | O    | GLU | 1365 | 102.753 | 46.418 | 39.552 | 0.00 | 0.00 |
| ATOM | 20423 | N    | THR | 1366 | 104.538 | 46.817 | 38.267 | 0.00 | 0.00 |
| ATOM | 20424 | H    | THR | 1366 | 104.916 | 47.073 | 37.366 | 0.00 | 0.00 |
| ATOM | 20425 | CA   | THR | 1366 | 105.527 | 46.456 | 39.331 | 0.00 | 0.00 |
| ATOM | 20426 | HA   | THR | 1366 | 105.186 | 45.598 | 39.911 | 0.00 | 0.00 |
| ATOM | 20427 | CB   | THR | 1366 | 106.878 | 46.021 | 38.660 | 0.00 | 0.00 |
| ATOM | 20428 | HB   | THR | 1366 | 107.611 | 45.895 | 39.457 | 0.00 | 0.00 |
| ATOM | 20429 | CG2  | THR | 1366 | 106.751 | 44.619 | 37.950 | 0.00 | 0.00 |
| ATOM | 20430 | 1HG2 | THR | 1366 | 106.131 | 43.999 | 38.598 | 0.00 | 0.00 |
| ATOM | 20431 | 2HG2 | THR | 1366 | 106.243 | 44.669 | 36.987 | 0.00 | 0.00 |

ATOM 20432 3HG2 THR 1366 107.753 44.189 37.944 0.00 0.00  
ATOM 20433 OG1 THR 1366 107.503 46.954 37.761 0.00 0.00  
ATOM 20434 HG1 THR 1366 106.983 46.878 36.957 0.00 0.00  
ATOM 20435 C THR 1366 105.756 47.592 40.298 0.00 0.00  
ATOM 20436 O THR 1366 106.669 47.464 41.173 0.00 0.00  
ATOM 20437 N GLY 1367 104.999 48.688 40.139 0.00 0.00  
ATOM 20438 H GLY 1367 104.382 48.722 39.340 0.00 0.00  
ATOM 20439 CA GLY 1367 105.328 49.962 40.871 0.00 0.00  
ATOM 20440 HA2 GLY 1367 106.240 50.424 40.492 0.00 0.00  
ATOM 20441 HA3 GLY 1367 104.506 50.641 40.643 0.00 0.00  
ATOM 20442 C GLY 1367 105.225 49.921 42.425 0.00 0.00  
ATOM 20443 O GLY 1367 104.150 49.772 43.002 0.00 0.00  
ATOM 20444 N ASP 1368 106.384 50.031 43.142 0.00 0.00  
ATOM 20445 H ASP 1368 107.225 49.971 42.586 0.00 0.00  
ATOM 20446 CA ASP 1368 106.626 50.216 44.621 0.00 0.00  
ATOM 20447 HA ASP 1368 106.054 49.340 44.928 0.00 0.00  
ATOM 20448 CB ASP 1368 108.104 50.034 45.170 0.00 0.00  
ATOM 20449 HB2 ASP 1368 108.336 49.054 44.754 0.00 0.00  
ATOM 20450 HB3 ASP 1368 108.093 49.935 46.255 0.00 0.00  
ATOM 20451 CG ASP 1368 109.042 51.196 44.763 0.00 0.00  
ATOM 20452 OD1 ASP 1368 108.863 51.798 43.627 0.00 0.00  
ATOM 20453 OD2 ASP 1368 110.069 51.471 45.466 0.00 0.00  
ATOM 20454 C ASP 1368 105.910 51.394 45.322 0.00 0.00  
ATOM 20455 O ASP 1368 106.322 51.904 46.354 0.00 0.00  
ATOM 20456 N ASN 1369 104.781 51.868 44.825 0.00 0.00  
ATOM 20457 H ASN 1369 104.373 51.303 44.094 0.00 0.00

|      |       |      |     |      |         |        |        |      |      |
|------|-------|------|-----|------|---------|--------|--------|------|------|
| ATOM | 20458 | CA   | ASN | 1369 | 103.792 | 52.677 | 45.592 | 0.00 | 0.00 |
| ATOM | 20459 | HA   | ASN | 1369 | 104.258 | 52.781 | 46.571 | 0.00 | 0.00 |
| ATOM | 20460 | CB   | ASN | 1369 | 103.685 | 54.078 | 45.034 | 0.00 | 0.00 |
| ATOM | 20461 | HB2  | ASN | 1369 | 103.054 | 54.830 | 45.507 | 0.00 | 0.00 |
| ATOM | 20462 | HB3  | ASN | 1369 | 104.714 | 54.438 | 45.031 | 0.00 | 0.00 |
| ATOM | 20463 | CG   | ASN | 1369 | 103.188 | 53.953 | 43.559 | 0.00 | 0.00 |
| ATOM | 20464 | OD1  | ASN | 1369 | 101.973 | 53.867 | 43.351 | 0.00 | 0.00 |
| ATOM | 20465 | ND2  | ASN | 1369 | 104.104 | 53.911 | 42.587 | 0.00 | 0.00 |
| ATOM | 20466 | 1HD2 | ASN | 1369 | 103.826 | 53.999 | 41.620 | 0.00 | 0.00 |
| ATOM | 20467 | 2HD2 | ASN | 1369 | 105.050 | 54.149 | 42.848 | 0.00 | 0.00 |
| ATOM | 20468 | C    | ASN | 1369 | 102.434 | 52.026 | 45.893 | 0.00 | 0.00 |
| ATOM | 20469 | O    | ASN | 1369 | 102.159 | 50.970 | 45.278 | 0.00 | 0.00 |
| ATOM | 20470 | N    | ASP | 1370 | 101.560 | 52.675 | 46.784 | 0.00 | 0.00 |
| ATOM | 20471 | H    | ASP | 1370 | 101.973 | 53.334 | 47.428 | 0.00 | 0.00 |
| ATOM | 20472 | CA   | ASP | 1370 | 100.225 | 52.067 | 47.115 | 0.00 | 0.00 |
| ATOM | 20473 | HA   | ASP | 1370 | 100.247 | 51.085 | 46.642 | 0.00 | 0.00 |
| ATOM | 20474 | CB   | ASP | 1370 | 100.048 | 51.959 | 48.644 | 0.00 | 0.00 |
| ATOM | 20475 | HB2  | ASP | 1370 | 100.047 | 52.946 | 49.106 | 0.00 | 0.00 |
| ATOM | 20476 | HB3  | ASP | 1370 | 99.075  | 51.601 | 48.982 | 0.00 | 0.00 |
| ATOM | 20477 | CG   | ASP | 1370 | 101.035 | 51.056 | 49.315 | 0.00 | 0.00 |
| ATOM | 20478 | OD1  | ASP | 1370 | 100.902 | 49.803 | 49.251 | 0.00 | 0.00 |
| ATOM | 20479 | OD2  | ASP | 1370 | 101.892 | 51.509 | 50.100 | 0.00 | 0.00 |
| ATOM | 20480 | C    | ASP | 1370 | 99.014  | 52.790 | 46.372 | 0.00 | 0.00 |
| ATOM | 20481 | O    | ASP | 1370 | 97.851  | 52.666 | 46.730 | 0.00 | 0.00 |
| ATOM | 20482 | N    | ASN | 1371 | 99.327  | 53.648 | 45.431 | 0.00 | 0.00 |
| ATOM | 20483 | H    | ASN | 1371 | 100.295 | 53.791 | 45.181 | 0.00 | 0.00 |

|            |      |     |      |         |        |        |      |      |
|------------|------|-----|------|---------|--------|--------|------|------|
| ATOM 20484 | CA   | ASN | 1371 | 98.401  | 54.484 | 44.796 | 0.00 | 0.00 |
| ATOM 20485 | HA   | ASN | 1371 | 97.997  | 55.167 | 45.545 | 0.00 | 0.00 |
| ATOM 20486 | CB   | ASN | 1371 | 99.072  | 55.286 | 43.683 | 0.00 | 0.00 |
| ATOM 20487 | HB2  | ASN | 1371 | 99.470  | 54.668 | 42.878 | 0.00 | 0.00 |
| ATOM 20488 | HB3  | ASN | 1371 | 98.241  | 55.763 | 43.162 | 0.00 | 0.00 |
| ATOM 20489 | CG   | ASN | 1371 | 100.006 | 56.399 | 44.139 | 0.00 | 0.00 |
| ATOM 20490 | OD1  | ASN | 1371 | 100.576 | 56.604 | 45.219 | 0.00 | 0.00 |
| ATOM 20491 | ND2  | ASN | 1371 | 100.209 | 57.248 | 43.207 | 0.00 | 0.00 |
| ATOM 20492 | 1HD2 | ASN | 1371 | 100.622 | 58.116 | 43.515 | 0.00 | 0.00 |
| ATOM 20493 | 2HD2 | ASN | 1371 | 99.872  | 57.057 | 42.274 | 0.00 | 0.00 |
| ATOM 20494 | C    | ASN | 1371 | 97.191  | 53.784 | 44.113 | 0.00 | 0.00 |
| ATOM 20495 | O    | ASN | 1371 | 96.081  | 54.334 | 44.047 | 0.00 | 0.00 |
| ATOM 20496 | N    | PHE | 1372 | 97.428  | 52.557 | 43.648 | 0.00 | 0.00 |
| ATOM 20497 | H    | PHE | 1372 | 98.368  | 52.222 | 43.810 | 0.00 | 0.00 |
| ATOM 20498 | CA   | PHE | 1372 | 96.431  | 51.849 | 42.863 | 0.00 | 0.00 |
| ATOM 20499 | HA   | PHE | 1372 | 95.870  | 52.609 | 42.319 | 0.00 | 0.00 |
| ATOM 20500 | CB   | PHE | 1372 | 96.993  | 50.896 | 41.846 | 0.00 | 0.00 |
| ATOM 20501 | HB2  | PHE | 1372 | 97.644  | 51.535 | 41.249 | 0.00 | 0.00 |
| ATOM 20502 | HB3  | PHE | 1372 | 97.689  | 50.140 | 42.211 | 0.00 | 0.00 |
| ATOM 20503 | CG   | PHE | 1372 | 96.020  | 50.131 | 40.952 | 0.00 | 0.00 |
| ATOM 20504 | CD1  | PHE | 1372 | 95.403  | 49.026 | 41.475 | 0.00 | 0.00 |
| ATOM 20505 | HD1  | PHE | 1372 | 95.446  | 48.806 | 42.531 | 0.00 | 0.00 |
| ATOM 20506 | CE1  | PHE | 1372 | 94.606  | 48.224 | 40.647 | 0.00 | 0.00 |
| ATOM 20507 | HE1  | PHE | 1372 | 94.086  | 47.360 | 41.036 | 0.00 | 0.00 |
| ATOM 20508 | CZ   | PHE | 1372 | 94.512  | 48.483 | 39.296 | 0.00 | 0.00 |
| ATOM 20509 | HZ   | PHE | 1372 | 93.968  | 47.786 | 38.676 | 0.00 | 0.00 |



|      |       |      |     |      |        |        |        |      |      |
|------|-------|------|-----|------|--------|--------|--------|------|------|
| ATOM | 20510 | CE2  | PHE | 1372 | 94.997 | 49.657 | 38.714 | 0.00 | 0.00 |
| ATOM | 20511 | HE2  | PHE | 1372 | 94.755 | 49.905 | 37.691 | 0.00 | 0.00 |
| ATOM | 20512 | CD2  | PHE | 1372 | 95.858 | 50.442 | 39.593 | 0.00 | 0.00 |
| ATOM | 20513 | HD2  | PHE | 1372 | 96.278 | 51.358 | 39.206 | 0.00 | 0.00 |
| ATOM | 20514 | C    | PHE | 1372 | 95.425 | 51.223 | 43.811 | 0.00 | 0.00 |
| ATOM | 20515 | O    | PHE | 1372 | 94.213 | 51.195 | 43.567 | 0.00 | 0.00 |
| ATOM | 20516 | N    | ARG | 1373 | 95.973 | 50.706 | 44.918 | 0.00 | 0.00 |
| ATOM | 20517 | H    | ARG | 1373 | 96.972 | 50.755 | 45.061 | 0.00 | 0.00 |
| ATOM | 20518 | CA   | ARG | 1373 | 95.016 | 50.344 | 45.991 | 0.00 | 0.00 |
| ATOM | 20519 | HA   | ARG | 1373 | 94.229 | 49.761 | 45.513 | 0.00 | 0.00 |
| ATOM | 20520 | CB   | ARG | 1373 | 95.638 | 49.399 | 47.030 | 0.00 | 0.00 |
| ATOM | 20521 | HB2  | ARG | 1373 | 96.046 | 48.526 | 46.521 | 0.00 | 0.00 |
| ATOM | 20522 | HB3  | ARG | 1373 | 96.564 | 49.888 | 47.332 | 0.00 | 0.00 |
| ATOM | 20523 | CG   | ARG | 1373 | 94.717 | 49.064 | 48.294 | 0.00 | 0.00 |
| ATOM | 20524 | HG2  | ARG | 1373 | 94.399 | 49.994 | 48.765 | 0.00 | 0.00 |
| ATOM | 20525 | HG3  | ARG | 1373 | 93.793 | 48.597 | 47.954 | 0.00 | 0.00 |
| ATOM | 20526 | CD   | ARG | 1373 | 95.313 | 48.207 | 49.348 | 0.00 | 0.00 |
| ATOM | 20527 | HD2  | ARG | 1373 | 96.376 | 48.443 | 49.408 | 0.00 | 0.00 |
| ATOM | 20528 | HD3  | ARG | 1373 | 94.760 | 48.325 | 50.280 | 0.00 | 0.00 |
| ATOM | 20529 | NE   | ARG | 1373 | 95.112 | 46.755 | 49.004 | 0.00 | 0.00 |
| ATOM | 20530 | HE   | ARG | 1373 | 94.157 | 46.470 | 48.840 | 0.00 | 0.00 |
| ATOM | 20531 | CZ   | ARG | 1373 | 96.032 | 45.962 | 48.575 | 0.00 | 0.00 |
| ATOM | 20532 | NH1  | ARG | 1373 | 97.278 | 46.195 | 48.472 | 0.00 | 0.00 |
| ATOM | 20533 | 1HH1 | ARG | 1373 | 97.932 | 45.459 | 48.245 | 0.00 | 0.00 |
| ATOM | 20534 | 2HH1 | ARG | 1373 | 97.674 | 47.095 | 48.700 | 0.00 | 0.00 |
| ATOM | 20535 | NH2  | ARG | 1373 | 95.689 | 44.776 | 48.221 | 0.00 | 0.00 |

ATOM 20536 1HH2 ARG 1373 96.387 44.289 47.676 0.00 0.00  
ATOM 20537 2HH2 ARG 1373 94.758 44.396 48.314 0.00 0.00  
ATOM 20538 C ARG 1373 94.330 51.533 46.604 0.00 0.00  
ATOM 20539 O ARG 1373 93.132 51.470 46.773 0.00 0.00  
ATOM 20540 N VAL 1374 95.004 52.687 46.758 0.00 0.00  
ATOM 20541 H VAL 1374 95.986 52.602 46.537 0.00 0.00  
ATOM 20542 CA VAL 1374 94.423 53.858 47.433 0.00 0.00  
ATOM 20543 HA VAL 1374 93.948 53.464 48.331 0.00 0.00  
ATOM 20544 CB VAL 1374 95.457 54.853 47.920 0.00 0.00  
ATOM 20545 HB VAL 1374 96.135 54.996 47.078 0.00 0.00  
ATOM 20546 CG1 VAL 1374 95.080 56.379 48.206 0.00 0.00  
ATOM 20547 1HG1 VAL 1374 94.130 56.416 48.740 0.00 0.00  
ATOM 20548 2HG1 VAL 1374 95.907 56.816 48.765 0.00 0.00  
ATOM 20549 3HG1 VAL 1374 94.915 56.846 47.235 0.00 0.00  
ATOM 20550 CG2 VAL 1374 96.138 54.306 49.140 0.00 0.00  
ATOM 20551 1HG2 VAL 1374 95.410 54.333 49.951 0.00 0.00  
ATOM 20552 2HG2 VAL 1374 96.323 53.242 48.989 0.00 0.00  
ATOM 20553 3HG2 VAL 1374 96.952 54.898 49.558 0.00 0.00  
ATOM 20554 C VAL 1374 93.263 54.565 46.667 0.00 0.00  
ATOM 20555 O VAL 1374 92.206 54.918 47.164 0.00 0.00  
ATOM 20556 N LYS 1375 93.501 54.820 45.347 0.00 0.00  
ATOM 20557 H LYS 1375 94.443 54.662 45.018 0.00 0.00  
ATOM 20558 CA LYS 1375 92.430 55.342 44.416 0.00 0.00  
ATOM 20559 HA LYS 1375 92.109 56.232 44.959 0.00 0.00  
ATOM 20560 CB LYS 1375 93.009 55.782 43.088 0.00 0.00  
ATOM 20561 HB2 LYS 1375 93.608 55.049 42.548 0.00 0.00

|      |       |     |     |      |        |        |        |      |      |
|------|-------|-----|-----|------|--------|--------|--------|------|------|
| ATOM | 20562 | HB3 | LYS | 1375 | 92.174 | 56.140 | 42.485 | 0.00 | 0.00 |
| ATOM | 20563 | CG  | LYS | 1375 | 93.905 | 57.009 | 43.191 | 0.00 | 0.00 |
| ATOM | 20564 | HG2 | LYS | 1375 | 93.225 | 57.777 | 43.559 | 0.00 | 0.00 |
| ATOM | 20565 | HG3 | LYS | 1375 | 94.637 | 56.644 | 43.912 | 0.00 | 0.00 |
| ATOM | 20566 | CD  | LYS | 1375 | 94.642 | 57.515 | 41.962 | 0.00 | 0.00 |
| ATOM | 20567 | HD2 | LYS | 1375 | 93.918 | 57.881 | 41.234 | 0.00 | 0.00 |
| ATOM | 20568 | HD3 | LYS | 1375 | 95.195 | 58.408 | 42.252 | 0.00 | 0.00 |
| ATOM | 20569 | CE  | LYS | 1375 | 95.458 | 56.468 | 41.239 | 0.00 | 0.00 |
| ATOM | 20570 | HE2 | LYS | 1375 | 96.328 | 56.133 | 41.802 | 0.00 | 0.00 |
| ATOM | 20571 | HE3 | LYS | 1375 | 94.946 | 55.525 | 41.047 | 0.00 | 0.00 |
| ATOM | 20572 | NZ  | LYS | 1375 | 95.930 | 57.061 | 39.945 | 0.00 | 0.00 |
| ATOM | 20573 | HZ1 | LYS | 1375 | 96.516 | 56.412 | 39.441 | 0.00 | 0.00 |
| ATOM | 20574 | HZ2 | LYS | 1375 | 95.178 | 57.268 | 39.303 | 0.00 | 0.00 |
| ATOM | 20575 | HZ3 | LYS | 1375 | 96.414 | 57.925 | 40.142 | 0.00 | 0.00 |
| ATOM | 20576 | C   | LYS | 1375 | 91.243 | 54.445 | 44.314 | 0.00 | 0.00 |
| ATOM | 20577 | O   | LYS | 1375 | 90.129 | 54.915 | 44.188 | 0.00 | 0.00 |
| ATOM | 20578 | N   | ARG | 1376 | 91.466 | 53.140 | 44.384 | 0.00 | 0.00 |
| ATOM | 20579 | H   | ARG | 1376 | 92.412 | 52.855 | 44.595 | 0.00 | 0.00 |
| ATOM | 20580 | CA  | ARG | 1376 | 90.416 | 52.068 | 44.459 | 0.00 | 0.00 |
| ATOM | 20581 | HA  | ARG | 1376 | 89.743 | 52.258 | 43.623 | 0.00 | 0.00 |
| ATOM | 20582 | CB  | ARG | 1376 | 90.952 | 50.648 | 44.185 | 0.00 | 0.00 |
| ATOM | 20583 | HB2 | ARG | 1376 | 91.310 | 50.542 | 43.161 | 0.00 | 0.00 |
| ATOM | 20584 | HB3 | ARG | 1376 | 91.857 | 50.476 | 44.769 | 0.00 | 0.00 |
| ATOM | 20585 | CG  | ARG | 1376 | 89.896 | 49.543 | 44.523 | 0.00 | 0.00 |
| ATOM | 20586 | HG2 | ARG | 1376 | 89.708 | 49.635 | 45.593 | 0.00 | 0.00 |
| ATOM | 20587 | HG3 | ARG | 1376 | 88.944 | 49.739 | 44.031 | 0.00 | 0.00 |

|      |       |      |     |      |        |        |        |      |      |
|------|-------|------|-----|------|--------|--------|--------|------|------|
| ATOM | 20588 | CD   | ARG | 1376 | 90.248 | 48.132 | 44.069 | 0.00 | 0.00 |
| ATOM | 20589 | HD2  | ARG | 1376 | 91.107 | 47.837 | 44.672 | 0.00 | 0.00 |
| ATOM | 20590 | HD3  | ARG | 1376 | 89.473 | 47.415 | 44.342 | 0.00 | 0.00 |
| ATOM | 20591 | NE   | ARG | 1376 | 90.551 | 48.013 | 42.643 | 0.00 | 0.00 |
| ATOM | 20592 | HE   | ARG | 1376 | 90.158 | 48.673 | 41.987 | 0.00 | 0.00 |
| ATOM | 20593 | CZ   | ARG | 1376 | 90.964 | 46.859 | 42.125 | 0.00 | 0.00 |
| ATOM | 20594 | NH1  | ARG | 1376 | 91.320 | 45.816 | 42.821 | 0.00 | 0.00 |
| ATOM | 20595 | 1HH1 | ARG | 1376 | 91.572 | 45.031 | 42.237 | 0.00 | 0.00 |
| ATOM | 20596 | 2HH1 | ARG | 1376 | 91.082 | 45.879 | 43.801 | 0.00 | 0.00 |
| ATOM | 20597 | NH2  | ARG | 1376 | 91.160 | 46.761 | 40.842 | 0.00 | 0.00 |
| ATOM | 20598 | 1HH2 | ARG | 1376 | 91.599 | 45.942 | 40.447 | 0.00 | 0.00 |
| ATOM | 20599 | 2HH2 | ARG | 1376 | 91.032 | 47.568 | 40.248 | 0.00 | 0.00 |
| ATOM | 20600 | C    | ARG | 1376 | 89.544 | 52.305 | 45.737 | 0.00 | 0.00 |
| ATOM | 20601 | O    | ARG | 1376 | 88.328 | 52.238 | 45.595 | 0.00 | 0.00 |
| ATOM | 20602 | N    | TYR | 1377 | 90.167 | 52.467 | 46.915 | 0.00 | 0.00 |
| ATOM | 20603 | H    | TYR | 1377 | 91.176 | 52.431 | 46.930 | 0.00 | 0.00 |
| ATOM | 20604 | CA   | TYR | 1377 | 89.409 | 52.575 | 48.162 | 0.00 | 0.00 |
| ATOM | 20605 | HA   | TYR | 1377 | 88.522 | 51.957 | 48.020 | 0.00 | 0.00 |
| ATOM | 20606 | CB   | TYR | 1377 | 90.316 | 52.146 | 49.279 | 0.00 | 0.00 |
| ATOM | 20607 | HB2  | TYR | 1377 | 91.376 | 52.331 | 49.108 | 0.00 | 0.00 |
| ATOM | 20608 | HB3  | TYR | 1377 | 90.111 | 52.713 | 50.187 | 0.00 | 0.00 |
| ATOM | 20609 | CG   | TYR | 1377 | 90.362 | 50.658 | 49.456 | 0.00 | 0.00 |
| ATOM | 20610 | CD1  | TYR | 1377 | 90.928 | 49.829 | 48.508 | 0.00 | 0.00 |
| ATOM | 20611 | HD1  | TYR | 1377 | 91.398 | 50.193 | 47.606 | 0.00 | 0.00 |
| ATOM | 20612 | CE1  | TYR | 1377 | 91.142 | 48.440 | 48.777 | 0.00 | 0.00 |
| ATOM | 20613 | HE1  | TYR | 1377 | 91.707 | 47.768 | 48.148 | 0.00 | 0.00 |

|      |       |      |     |      |        |        |        |      |      |
|------|-------|------|-----|------|--------|--------|--------|------|------|
| ATOM | 20614 | CZ   | TYR | 1377 | 90.704 | 47.933 | 50.058 | 0.00 | 0.00 |
| ATOM | 20615 | OH   | TYR | 1377 | 90.903 | 46.645 | 50.348 | 0.00 | 0.00 |
| ATOM | 20616 | HH   | TYR | 1377 | 91.389 | 46.187 | 49.658 | 0.00 | 0.00 |
| ATOM | 20617 | CE2  | TYR | 1377 | 89.959 | 48.777 | 50.940 | 0.00 | 0.00 |
| ATOM | 20618 | HE2  | TYR | 1377 | 89.590 | 48.370 | 51.870 | 0.00 | 0.00 |
| ATOM | 20619 | CD2  | TYR | 1377 | 89.669 | 50.129 | 50.609 | 0.00 | 0.00 |
| ATOM | 20620 | HD2  | TYR | 1377 | 89.004 | 50.684 | 51.254 | 0.00 | 0.00 |
| ATOM | 20621 | C    | TYR | 1377 | 88.763 | 53.978 | 48.432 | 0.00 | 0.00 |
| ATOM | 20622 | O    | TYR | 1377 | 87.588 | 53.899 | 48.744 | 0.00 | 0.00 |
| ATOM | 20623 | N    | ILE | 1378 | 89.506 | 55.106 | 48.076 | 0.00 | 0.00 |
| ATOM | 20624 | H    | ILE | 1378 | 90.463 | 55.087 | 47.752 | 0.00 | 0.00 |
| ATOM | 20625 | CA   | ILE | 1378 | 88.796 | 56.400 | 48.313 | 0.00 | 0.00 |
| ATOM | 20626 | HA   | ILE | 1378 | 88.549 | 56.318 | 49.371 | 0.00 | 0.00 |
| ATOM | 20627 | CB   | ILE | 1378 | 89.765 | 57.609 | 48.167 | 0.00 | 0.00 |
| ATOM | 20628 | HB   | ILE | 1378 | 90.542 | 57.478 | 48.920 | 0.00 | 0.00 |
| ATOM | 20629 | CG2  | ILE | 1378 | 90.555 | 57.714 | 46.859 | 0.00 | 0.00 |
| ATOM | 20630 | 1HG2 | ILE | 1378 | 90.728 | 58.736 | 46.522 | 0.00 | 0.00 |
| ATOM | 20631 | 2HG2 | ILE | 1378 | 91.540 | 57.267 | 46.997 | 0.00 | 0.00 |
| ATOM | 20632 | 3HG2 | ILE | 1378 | 89.912 | 57.186 | 46.155 | 0.00 | 0.00 |
| ATOM | 20633 | CG1  | ILE | 1378 | 89.056 | 58.942 | 48.523 | 0.00 | 0.00 |
| ATOM | 20634 | 2HG1 | ILE | 1378 | 88.463 | 59.292 | 47.678 | 0.00 | 0.00 |
| ATOM | 20635 | 3HG1 | ILE | 1378 | 88.307 | 58.803 | 49.303 | 0.00 | 0.00 |
| ATOM | 20636 | CD1  | ILE | 1378 | 90.001 | 59.990 | 49.056 | 0.00 | 0.00 |
| ATOM | 20637 | 1HD1 | ILE | 1378 | 89.460 | 60.861 | 49.425 | 0.00 | 0.00 |
| ATOM | 20638 | 2HD1 | ILE | 1378 | 90.574 | 59.606 | 49.900 | 0.00 | 0.00 |
| ATOM | 20639 | 3HD1 | ILE | 1378 | 90.682 | 60.306 | 48.266 | 0.00 | 0.00 |

|      |       |     |     |      |        |        |        |      |      |
|------|-------|-----|-----|------|--------|--------|--------|------|------|
| ATOM | 20640 | C   | ILE | 1378 | 87.500 | 56.609 | 47.476 | 0.00 | 0.00 |
| ATOM | 20641 | O   | ILE | 1378 | 86.470 | 57.131 | 47.891 | 0.00 | 0.00 |
| ATOM | 20642 | N   | ALA | 1379 | 87.464 | 56.014 | 46.248 | 0.00 | 0.00 |
| ATOM | 20643 | H   | ALA | 1379 | 88.333 | 55.697 | 45.844 | 0.00 | 0.00 |
| ATOM | 20644 | CA  | ALA | 1379 | 86.200 | 55.886 | 45.551 | 0.00 | 0.00 |
| ATOM | 20645 | HA  | ALA | 1379 | 85.921 | 56.928 | 45.400 | 0.00 | 0.00 |
| ATOM | 20646 | CB  | ALA | 1379 | 86.437 | 55.163 | 44.207 | 0.00 | 0.00 |
| ATOM | 20647 | HB1 | ALA | 1379 | 85.502 | 55.277 | 43.659 | 0.00 | 0.00 |
| ATOM | 20648 | HB2 | ALA | 1379 | 87.152 | 55.800 | 43.686 | 0.00 | 0.00 |
| ATOM | 20649 | HB3 | ALA | 1379 | 86.749 | 54.119 | 44.187 | 0.00 | 0.00 |
| ATOM | 20650 | C   | ALA | 1379 | 84.975 | 55.276 | 46.268 | 0.00 | 0.00 |
| ATOM | 20651 | O   | ALA | 1379 | 83.843 | 55.649 | 46.049 | 0.00 | 0.00 |
| ATOM | 20652 | N   | LYS | 1380 | 85.202 | 54.283 | 47.142 | 0.00 | 0.00 |
| ATOM | 20653 | H   | LYS | 1380 | 86.159 | 54.005 | 47.306 | 0.00 | 0.00 |
| ATOM | 20654 | CA  | LYS | 1380 | 84.193 | 53.626 | 47.856 | 0.00 | 0.00 |
| ATOM | 20655 | HA  | LYS | 1380 | 83.404 | 53.266 | 47.197 | 0.00 | 0.00 |
| ATOM | 20656 | CB  | LYS | 1380 | 84.771 | 52.350 | 48.554 | 0.00 | 0.00 |
| ATOM | 20657 | HB2 | LYS | 1380 | 85.429 | 52.751 | 49.324 | 0.00 | 0.00 |
| ATOM | 20658 | HB3 | LYS | 1380 | 83.936 | 51.910 | 49.099 | 0.00 | 0.00 |
| ATOM | 20659 | CG  | LYS | 1380 | 85.557 | 51.255 | 47.742 | 0.00 | 0.00 |
| ATOM | 20660 | HG2 | LYS | 1380 | 84.874 | 50.685 | 47.112 | 0.00 | 0.00 |
| ATOM | 20661 | HG3 | LYS | 1380 | 86.306 | 51.658 | 47.060 | 0.00 | 0.00 |
| ATOM | 20662 | CD  | LYS | 1380 | 86.186 | 50.434 | 48.843 | 0.00 | 0.00 |
| ATOM | 20663 | HD2 | LYS | 1380 | 86.708 | 51.038 | 49.585 | 0.00 | 0.00 |
| ATOM | 20664 | HD3 | LYS | 1380 | 85.420 | 49.935 | 49.437 | 0.00 | 0.00 |
| ATOM | 20665 | CE  | LYS | 1380 | 87.114 | 49.278 | 48.288 | 0.00 | 0.00 |

|      |       |     |     |      |        |        |        |      |      |
|------|-------|-----|-----|------|--------|--------|--------|------|------|
| ATOM | 20666 | HE2 | LYS | 1380 | 88.020 | 49.612 | 47.782 | 0.00 | 0.00 |
| ATOM | 20667 | HE3 | LYS | 1380 | 87.353 | 48.592 | 49.100 | 0.00 | 0.00 |
| ATOM | 20668 | NZ  | LYS | 1380 | 86.303 | 48.437 | 47.396 | 0.00 | 0.00 |
| ATOM | 20669 | HZ1 | LYS | 1380 | 86.832 | 47.589 | 47.251 | 0.00 | 0.00 |
| ATOM | 20670 | HZ2 | LYS | 1380 | 85.501 | 48.096 | 47.906 | 0.00 | 0.00 |
| ATOM | 20671 | HZ3 | LYS | 1380 | 85.946 | 48.949 | 46.602 | 0.00 | 0.00 |
| ATOM | 20672 | C   | LYS | 1380 | 83.417 | 54.496 | 48.912 | 0.00 | 0.00 |
| ATOM | 20673 | O   | LYS | 1380 | 82.224 | 54.211 | 49.202 | 0.00 | 0.00 |
| ATOM | 20674 | N   | TYR | 1381 | 83.991 | 55.615 | 49.347 | 0.00 | 0.00 |
| ATOM | 20675 | H   | TYR | 1381 | 84.949 | 55.783 | 49.077 | 0.00 | 0.00 |
| ATOM | 20676 | CA  | TYR | 1381 | 83.247 | 56.669 | 50.117 | 0.00 | 0.00 |
| ATOM | 20677 | HA  | TYR | 1381 | 82.250 | 56.228 | 50.102 | 0.00 | 0.00 |
| ATOM | 20678 | CB  | TYR | 1381 | 83.806 | 56.885 | 51.493 | 0.00 | 0.00 |
| ATOM | 20679 | HB2 | TYR | 1381 | 83.077 | 57.488 | 52.036 | 0.00 | 0.00 |
| ATOM | 20680 | HB3 | TYR | 1381 | 84.044 | 55.892 | 51.875 | 0.00 | 0.00 |
| ATOM | 20681 | CG  | TYR | 1381 | 85.135 | 57.676 | 51.568 | 0.00 | 0.00 |
| ATOM | 20682 | CD1 | TYR | 1381 | 85.098 | 59.033 | 51.785 | 0.00 | 0.00 |
| ATOM | 20683 | HD1 | TYR | 1381 | 84.107 | 59.424 | 51.965 | 0.00 | 0.00 |
| ATOM | 20684 | CE1 | TYR | 1381 | 86.260 | 59.776 | 52.027 | 0.00 | 0.00 |
| ATOM | 20685 | HE1 | TYR | 1381 | 86.165 | 60.838 | 52.195 | 0.00 | 0.00 |
| ATOM | 20686 | CZ  | TYR | 1381 | 87.499 | 59.106 | 52.030 | 0.00 | 0.00 |
| ATOM | 20687 | OH  | TYR | 1381 | 88.694 | 59.757 | 52.150 | 0.00 | 0.00 |
| ATOM | 20688 | HH  | TYR | 1381 | 88.731 | 60.679 | 51.886 | 0.00 | 0.00 |
| ATOM | 20689 | CE2 | TYR | 1381 | 87.502 | 57.729 | 51.863 | 0.00 | 0.00 |
| ATOM | 20690 | HE2 | TYR | 1381 | 88.461 | 57.257 | 52.021 | 0.00 | 0.00 |
| ATOM | 20691 | CD2 | TYR | 1381 | 86.354 | 56.970 | 51.644 | 0.00 | 0.00 |

|      |       |      |     |      |        |        |        |      |      |
|------|-------|------|-----|------|--------|--------|--------|------|------|
| ATOM | 20692 | HD2  | TYR | 1381 | 86.389 | 55.891 | 51.598 | 0.00 | 0.00 |
| ATOM | 20693 | C    | TYR | 1381 | 83.126 | 58.041 | 49.400 | 0.00 | 0.00 |
| ATOM | 20694 | O    | TYR | 1381 | 82.431 | 58.893 | 49.957 | 0.00 | 0.00 |
| ATOM | 20695 | N    | THR | 1382 | 83.734 | 58.150 | 48.266 | 0.00 | 0.00 |
| ATOM | 20696 | H    | THR | 1382 | 84.291 | 57.429 | 47.830 | 0.00 | 0.00 |
| ATOM | 20697 | CA   | THR | 1382 | 83.497 | 59.408 | 47.560 | 0.00 | 0.00 |
| ATOM | 20698 | HA   | THR | 1382 | 82.988 | 60.162 | 48.160 | 0.00 | 0.00 |
| ATOM | 20699 | CB   | THR | 1382 | 84.798 | 60.249 | 47.426 | 0.00 | 0.00 |
| ATOM | 20700 | HB   | THR | 1382 | 84.479 | 61.218 | 47.041 | 0.00 | 0.00 |
| ATOM | 20701 | CG2  | THR | 1382 | 85.587 | 60.512 | 48.691 | 0.00 | 0.00 |
| ATOM | 20702 | 1HG2 | THR | 1382 | 84.940 | 61.092 | 49.350 | 0.00 | 0.00 |
| ATOM | 20703 | 2HG2 | THR | 1382 | 85.668 | 59.518 | 49.130 | 0.00 | 0.00 |
| ATOM | 20704 | 3HG2 | THR | 1382 | 86.545 | 60.997 | 48.504 | 0.00 | 0.00 |
| ATOM | 20705 | OG1  | THR | 1382 | 85.737 | 59.655 | 46.534 | 0.00 | 0.00 |
| ATOM | 20706 | HG1  | THR | 1382 | 86.064 | 60.336 | 45.943 | 0.00 | 0.00 |
| ATOM | 20707 | C    | THR | 1382 | 82.587 | 59.273 | 46.289 | 0.00 | 0.00 |
| ATOM | 20708 | O    | THR | 1382 | 81.339 | 59.324 | 46.305 | 0.00 | 0.00 |
| ATOM | 20709 | N    | ILE | 1383 | 83.200 | 58.866 | 45.128 | 0.00 | 0.00 |
| ATOM | 20710 | H    | ILE | 1383 | 84.194 | 58.686 | 45.134 | 0.00 | 0.00 |
| ATOM | 20711 | CA   | ILE | 1383 | 82.588 | 58.820 | 43.801 | 0.00 | 0.00 |
| ATOM | 20712 | HA   | ILE | 1383 | 81.844 | 59.617 | 43.812 | 0.00 | 0.00 |
| ATOM | 20713 | CB   | ILE | 1383 | 83.637 | 59.174 | 42.694 | 0.00 | 0.00 |
| ATOM | 20714 | HB   | ILE | 1383 | 84.207 | 59.974 | 43.167 | 0.00 | 0.00 |
| ATOM | 20715 | CG2  | ILE | 1383 | 84.545 | 57.972 | 42.340 | 0.00 | 0.00 |
| ATOM | 20716 | 1HG2 | ILE | 1383 | 85.023 | 57.518 | 43.208 | 0.00 | 0.00 |
| ATOM | 20717 | 2HG2 | ILE | 1383 | 83.987 | 57.206 | 41.802 | 0.00 | 0.00 |



|      |       |      |     |      |        |        |        |      |      |
|------|-------|------|-----|------|--------|--------|--------|------|------|
| ATOM | 20718 | 3HG2 | ILE | 1383 | 85.294 | 58.306 | 41.621 | 0.00 | 0.00 |
| ATOM | 20719 | CG1  | ILE | 1383 | 83.068 | 59.847 | 41.417 | 0.00 | 0.00 |
| ATOM | 20720 | 2HG1 | ILE | 1383 | 83.778 | 60.175 | 40.657 | 0.00 | 0.00 |
| ATOM | 20721 | 3HG1 | ILE | 1383 | 82.337 | 59.216 | 40.913 | 0.00 | 0.00 |
| ATOM | 20722 | CD1  | ILE | 1383 | 82.352 | 61.173 | 41.713 | 0.00 | 0.00 |
| ATOM | 20723 | 1HD1 | ILE | 1383 | 82.252 | 61.761 | 40.801 | 0.00 | 0.00 |
| ATOM | 20724 | 2HD1 | ILE | 1383 | 81.380 | 60.946 | 42.151 | 0.00 | 0.00 |
| ATOM | 20725 | 3HD1 | ILE | 1383 | 82.946 | 61.766 | 42.408 | 0.00 | 0.00 |
| ATOM | 20726 | C    | ILE | 1383 | 81.719 | 57.610 | 43.426 | 0.00 | 0.00 |
| ATOM | 20727 | O    | ILE | 1383 | 80.683 | 57.759 | 42.752 | 0.00 | 0.00 |
| ATOM | 20728 | N    | ASN | 1384 | 81.985 | 56.431 | 43.937 | 0.00 | 0.00 |
| ATOM | 20729 | H    | ASN | 1384 | 82.809 | 56.275 | 44.500 | 0.00 | 0.00 |
| ATOM | 20730 | CA   | ASN | 1384 | 81.111 | 55.264 | 43.726 | 0.00 | 0.00 |
| ATOM | 20731 | HA   | ASN | 1384 | 80.729 | 55.261 | 42.705 | 0.00 | 0.00 |
| ATOM | 20732 | CB   | ASN | 1384 | 81.819 | 53.947 | 43.924 | 0.00 | 0.00 |
| ATOM | 20733 | HB2  | ASN | 1384 | 82.307 | 53.970 | 44.898 | 0.00 | 0.00 |
| ATOM | 20734 | HB3  | ASN | 1384 | 81.057 | 53.167 | 43.921 | 0.00 | 0.00 |
| ATOM | 20735 | CG   | ASN | 1384 | 82.743 | 53.644 | 42.793 | 0.00 | 0.00 |
| ATOM | 20736 | OD1  | ASN | 1384 | 82.483 | 54.041 | 41.694 | 0.00 | 0.00 |
| ATOM | 20737 | ND2  | ASN | 1384 | 83.836 | 52.863 | 42.893 | 0.00 | 0.00 |
| ATOM | 20738 | 1HD2 | ASN | 1384 | 84.475 | 52.789 | 42.115 | 0.00 | 0.00 |
| ATOM | 20739 | 2HD2 | ASN | 1384 | 83.996 | 52.282 | 43.704 | 0.00 | 0.00 |
| ATOM | 20740 | C    | ASN | 1384 | 79.745 | 55.359 | 44.510 | 0.00 | 0.00 |
| ATOM | 20741 | O    | ASN | 1384 | 78.676 | 54.942 | 43.950 | 0.00 | 0.00 |
| ATOM | 20742 | N    | PRO | 1385 | 79.692 | 55.810 | 45.805 | 0.00 | 0.00 |
| ATOM | 20743 | CD   | PRO | 1385 | 80.745 | 56.192 | 46.769 | 0.00 | 0.00 |

|      |       |         |      |        |        |        |      |      |
|------|-------|---------|------|--------|--------|--------|------|------|
| ATOM | 20744 | HD2 PRO | 1385 | 81.501 | 56.820 | 46.296 | 0.00 | 0.00 |
| ATOM | 20745 | HD3 PRO | 1385 | 81.201 | 55.251 | 47.078 | 0.00 | 0.00 |
| ATOM | 20746 | CG PRO  | 1385 | 80.048 | 56.887 | 48.044 | 0.00 | 0.00 |
| ATOM | 20747 | HG2 PRO | 1385 | 80.415 | 56.482 | 48.987 | 0.00 | 0.00 |
| ATOM | 20748 | HG3 PRO | 1385 | 80.082 | 57.976 | 48.078 | 0.00 | 0.00 |
| ATOM | 20749 | CB PRO  | 1385 | 78.552 | 56.427 | 47.883 | 0.00 | 0.00 |
| ATOM | 20750 | HB2 PRO | 1385 | 78.563 | 55.423 | 48.307 | 0.00 | 0.00 |
| ATOM | 20751 | HB3 PRO | 1385 | 77.784 | 57.037 | 48.357 | 0.00 | 0.00 |
| ATOM | 20752 | CA PRO  | 1385 | 78.322 | 56.122 | 46.401 | 0.00 | 0.00 |
| ATOM | 20753 | HA PRO  | 1385 | 77.685 | 55.237 | 46.395 | 0.00 | 0.00 |
| ATOM | 20754 | C PRO   | 1385 | 77.541 | 57.274 | 45.716 | 0.00 | 0.00 |
| ATOM | 20755 | O PRO   | 1385 | 76.307 | 57.242 | 45.569 | 0.00 | 0.00 |
| ATOM | 20756 | N ALA   | 1386 | 78.307 | 58.141 | 45.025 | 0.00 | 0.00 |
| ATOM | 20757 | H ALA   | 1386 | 79.282 | 58.142 | 45.287 | 0.00 | 0.00 |
| ATOM | 20758 | CA ALA  | 1386 | 77.740 | 59.199 | 44.234 | 0.00 | 0.00 |
| ATOM | 20759 | HA ALA  | 1386 | 76.882 | 59.691 | 44.691 | 0.00 | 0.00 |
| ATOM | 20760 | CB ALA  | 1386 | 78.760 | 60.343 | 44.190 | 0.00 | 0.00 |
| ATOM | 20761 | HB1 ALA | 1386 | 79.524 | 60.098 | 43.452 | 0.00 | 0.00 |
| ATOM | 20762 | HB2 ALA | 1386 | 78.233 | 61.279 | 44.005 | 0.00 | 0.00 |
| ATOM | 20763 | HB3 ALA | 1386 | 79.235 | 60.343 | 45.172 | 0.00 | 0.00 |
| ATOM | 20764 | C ALA   | 1386 | 77.155 | 58.604 | 42.899 | 0.00 | 0.00 |
| ATOM | 20765 | O ALA   | 1386 | 76.105 | 59.027 | 42.386 | 0.00 | 0.00 |
| ATOM | 20766 | N LEU   | 1387 | 77.822 | 57.531 | 42.336 | 0.00 | 0.00 |
| ATOM | 20767 | H LEU   | 1387 | 78.716 | 57.353 | 42.771 | 0.00 | 0.00 |
| ATOM | 20768 | CA LEU  | 1387 | 77.514 | 56.874 | 41.027 | 0.00 | 0.00 |
| ATOM | 20769 | HA LEU  | 1387 | 77.127 | 57.719 | 40.457 | 0.00 | 0.00 |

|      |       |      |     |      |        |        |        |      |      |
|------|-------|------|-----|------|--------|--------|--------|------|------|
| ATOM | 20770 | CB   | LEU | 1387 | 78.778 | 56.347 | 40.297 | 0.00 | 0.00 |
| ATOM | 20771 | HB2  | LEU | 1387 | 79.442 | 57.185 | 40.083 | 0.00 | 0.00 |
| ATOM | 20772 | HB3  | LEU | 1387 | 79.378 | 55.772 | 41.002 | 0.00 | 0.00 |
| ATOM | 20773 | CG   | LEU | 1387 | 78.629 | 55.609 | 38.994 | 0.00 | 0.00 |
| ATOM | 20774 | HG   | LEU | 1387 | 78.132 | 54.675 | 39.254 | 0.00 | 0.00 |
| ATOM | 20775 | CD1  | LEU | 1387 | 77.886 | 56.391 | 37.959 | 0.00 | 0.00 |
| ATOM | 20776 | 1HD1 | LEU | 1387 | 78.323 | 57.385 | 37.873 | 0.00 | 0.00 |
| ATOM | 20777 | 2HD1 | LEU | 1387 | 78.075 | 55.750 | 37.098 | 0.00 | 0.00 |
| ATOM | 20778 | 3HD1 | LEU | 1387 | 76.819 | 56.423 | 38.179 | 0.00 | 0.00 |
| ATOM | 20779 | CD2  | LEU | 1387 | 79.968 | 55.234 | 38.351 | 0.00 | 0.00 |
| ATOM | 20780 | 1HD2 | LEU | 1387 | 79.723 | 54.398 | 37.695 | 0.00 | 0.00 |
| ATOM | 20781 | 2HD2 | LEU | 1387 | 80.360 | 56.027 | 37.714 | 0.00 | 0.00 |
| ATOM | 20782 | 3HD2 | LEU | 1387 | 80.651 | 55.005 | 39.169 | 0.00 | 0.00 |
| ATOM | 20783 | C    | LEU | 1387 | 76.306 | 55.933 | 41.233 | 0.00 | 0.00 |
| ATOM | 20784 | O    | LEU | 1387 | 75.581 | 55.683 | 40.276 | 0.00 | 0.00 |
| ATOM | 20785 | N    | THR | 1388 | 76.163 | 55.218 | 42.367 | 0.00 | 0.00 |
| ATOM | 20786 | H    | THR | 1388 | 76.955 | 55.410 | 42.963 | 0.00 | 0.00 |
| ATOM | 20787 | CA   | THR | 1388 | 75.043 | 54.257 | 42.720 | 0.00 | 0.00 |
| ATOM | 20788 | HA   | THR | 1388 | 74.806 | 53.593 | 41.888 | 0.00 | 0.00 |
| ATOM | 20789 | CB   | THR | 1388 | 75.278 | 53.605 | 44.156 | 0.00 | 0.00 |
| ATOM | 20790 | HB   | THR | 1388 | 74.371 | 53.250 | 44.646 | 0.00 | 0.00 |
| ATOM | 20791 | CG2  | THR | 1388 | 76.220 | 52.451 | 44.050 | 0.00 | 0.00 |
| ATOM | 20792 | 1HG2 | THR | 1388 | 76.061 | 51.824 | 44.928 | 0.00 | 0.00 |
| ATOM | 20793 | 2HG2 | THR | 1388 | 75.915 | 51.901 | 43.160 | 0.00 | 0.00 |
| ATOM | 20794 | 3HG2 | THR | 1388 | 77.292 | 52.611 | 43.939 | 0.00 | 0.00 |
| ATOM | 20795 | OG1  | THR | 1388 | 75.910 | 54.482 | 45.045 | 0.00 | 0.00 |

|      |       |     |     |      |        |        |        |      |      |
|------|-------|-----|-----|------|--------|--------|--------|------|------|
| ATOM | 20796 | HG1 | THR | 1388 | 76.844 | 54.458 | 44.823 | 0.00 | 0.00 |
| ATOM | 20797 | C   | THR | 1388 | 73.792 | 55.178 | 42.836 | 0.00 | 0.00 |
| ATOM | 20798 | O   | THR | 1388 | 72.791 | 54.728 | 42.458 | 0.00 | 0.00 |
| ATOM | 20799 | N   | HID | 1389 | 73.806 | 56.456 | 43.337 | 0.00 | 0.00 |
| ATOM | 20800 | H   | HID | 1389 | 74.665 | 56.698 | 43.810 | 0.00 | 0.00 |
| ATOM | 20801 | CA  | HID | 1389 | 72.543 | 57.205 | 43.659 | 0.00 | 0.00 |
| ATOM | 20802 | HA  | HID | 1389 | 71.746 | 56.470 | 43.548 | 0.00 | 0.00 |
| ATOM | 20803 | CB  | HID | 1389 | 72.729 | 57.614 | 45.114 | 0.00 | 0.00 |
| ATOM | 20804 | HB2 | HID | 1389 | 73.724 | 58.045 | 45.226 | 0.00 | 0.00 |
| ATOM | 20805 | HB3 | HID | 1389 | 72.017 | 58.394 | 45.382 | 0.00 | 0.00 |
| ATOM | 20806 | CG  | HID | 1389 | 72.699 | 56.512 | 46.125 | 0.00 | 0.00 |
| ATOM | 20807 | ND1 | HID | 1389 | 73.692 | 55.681 | 46.518 | 0.00 | 0.00 |
| ATOM | 20808 | HD1 | HID | 1389 | 74.623 | 55.611 | 46.133 | 0.00 | 0.00 |
| ATOM | 20809 | CE1 | HID | 1389 | 73.108 | 54.704 | 47.276 | 0.00 | 0.00 |
| ATOM | 20810 | HE1 | HID | 1389 | 73.620 | 53.775 | 47.482 | 0.00 | 0.00 |
| ATOM | 20811 | NE2 | HID | 1389 | 71.793 | 54.857 | 47.342 | 0.00 | 0.00 |
| ATOM | 20812 | CD2 | HID | 1389 | 71.528 | 56.012 | 46.609 | 0.00 | 0.00 |
| ATOM | 20813 | HD2 | HID | 1389 | 70.512 | 56.349 | 46.467 | 0.00 | 0.00 |
| ATOM | 20814 | C   | HID | 1389 | 72.242 | 58.346 | 42.706 | 0.00 | 0.00 |
| ATOM | 20815 | O   | HID | 1389 | 71.413 | 59.260 | 42.768 | 0.00 | 0.00 |
| ATOM | 20816 | N   | GLY | 1390 | 73.117 | 58.476 | 41.709 | 0.00 | 0.00 |
| ATOM | 20817 | H   | GLY | 1390 | 73.737 | 57.713 | 41.474 | 0.00 | 0.00 |
| ATOM | 20818 | CA  | GLY | 1390 | 73.021 | 59.414 | 40.632 | 0.00 | 0.00 |
| ATOM | 20819 | HA2 | GLY | 1390 | 73.818 | 59.045 | 39.987 | 0.00 | 0.00 |
| ATOM | 20820 | HA3 | GLY | 1390 | 72.097 | 59.495 | 40.061 | 0.00 | 0.00 |
| ATOM | 20821 | C   | GLY | 1390 | 73.337 | 60.824 | 40.992 | 0.00 | 0.00 |

|      |       |      |     |      |        |        |        |      |      |
|------|-------|------|-----|------|--------|--------|--------|------|------|
| ATOM | 20822 | O    | GLY | 1390 | 72.652 | 61.754 | 40.498 | 0.00 | 0.00 |
| ATOM | 20823 | N    | ILE | 1391 | 74.162 | 61.046 | 41.984 | 0.00 | 0.00 |
| ATOM | 20824 | H    | ILE | 1391 | 74.577 | 60.270 | 42.480 | 0.00 | 0.00 |
| ATOM | 20825 | CA   | ILE | 1391 | 74.573 | 62.372 | 42.447 | 0.00 | 0.00 |
| ATOM | 20826 | HA   | ILE | 1391 | 74.034 | 63.175 | 41.945 | 0.00 | 0.00 |
| ATOM | 20827 | CB   | ILE | 1391 | 74.278 | 62.634 | 43.958 | 0.00 | 0.00 |
| ATOM | 20828 | HB   | ILE | 1391 | 74.622 | 63.658 | 44.106 | 0.00 | 0.00 |
| ATOM | 20829 | CG2  | ILE | 1391 | 72.752 | 62.533 | 44.227 | 0.00 | 0.00 |
| ATOM | 20830 | 1HG2 | ILE | 1391 | 72.346 | 61.565 | 43.934 | 0.00 | 0.00 |
| ATOM | 20831 | 2HG2 | ILE | 1391 | 72.672 | 62.694 | 45.302 | 0.00 | 0.00 |
| ATOM | 20832 | 3HG2 | ILE | 1391 | 72.252 | 63.336 | 43.686 | 0.00 | 0.00 |
| ATOM | 20833 | CG1  | ILE | 1391 | 75.080 | 61.725 | 44.905 | 0.00 | 0.00 |
| ATOM | 20834 | 2HG1 | ILE | 1391 | 74.835 | 60.670 | 44.776 | 0.00 | 0.00 |
| ATOM | 20835 | 3HG1 | ILE | 1391 | 76.098 | 61.879 | 44.547 | 0.00 | 0.00 |
| ATOM | 20836 | CD1  | ILE | 1391 | 74.987 | 61.982 | 46.417 | 0.00 | 0.00 |
| ATOM | 20837 | 1HD1 | ILE | 1391 | 75.728 | 61.337 | 46.889 | 0.00 | 0.00 |
| ATOM | 20838 | 2HD1 | ILE | 1391 | 75.145 | 63.041 | 46.622 | 0.00 | 0.00 |
| ATOM | 20839 | 3HD1 | ILE | 1391 | 74.003 | 61.677 | 46.775 | 0.00 | 0.00 |
| ATOM | 20840 | C    | ILE | 1391 | 76.114 | 62.713 | 42.246 | 0.00 | 0.00 |
| ATOM | 20841 | O    | ILE | 1391 | 76.700 | 63.727 | 42.617 | 0.00 | 0.00 |
| ATOM | 20842 | N    | ALA | 1392 | 76.684 | 61.906 | 41.382 | 0.00 | 0.00 |
| ATOM | 20843 | H    | ALA | 1392 | 76.210 | 61.046 | 41.146 | 0.00 | 0.00 |
| ATOM | 20844 | CA   | ALA | 1392 | 78.120 | 61.990 | 40.897 | 0.00 | 0.00 |
| ATOM | 20845 | HA   | ALA | 1392 | 78.755 | 62.052 | 41.781 | 0.00 | 0.00 |
| ATOM | 20846 | CB   | ALA | 1392 | 78.510 | 60.740 | 40.109 | 0.00 | 0.00 |
| ATOM | 20847 | HB1  | ALA | 1392 | 78.255 | 59.805 | 40.609 | 0.00 | 0.00 |

|      |       |     |     |      |        |        |        |      |      |
|------|-------|-----|-----|------|--------|--------|--------|------|------|
| ATOM | 20848 | HB2 | ALA | 1392 | 78.159 | 60.737 | 39.078 | 0.00 | 0.00 |
| ATOM | 20849 | HB3 | ALA | 1392 | 79.590 | 60.591 | 40.095 | 0.00 | 0.00 |
| ATOM | 20850 | C   | ALA | 1392 | 78.363 | 63.298 | 40.007 | 0.00 | 0.00 |
| ATOM | 20851 | O   | ALA | 1392 | 79.501 | 63.608 | 39.642 | 0.00 | 0.00 |
| ATOM | 20852 | N   | HIE | 1393 | 77.285 | 63.915 | 39.443 | 0.00 | 0.00 |
| ATOM | 20853 | H   | HIE | 1393 | 76.349 | 63.594 | 39.642 | 0.00 | 0.00 |
| ATOM | 20854 | CA  | HIE | 1393 | 77.411 | 65.262 | 38.876 | 0.00 | 0.00 |
| ATOM | 20855 | HA  | HIE | 1393 | 78.324 | 65.375 | 38.292 | 0.00 | 0.00 |
| ATOM | 20856 | CB  | HIE | 1393 | 76.189 | 65.518 | 38.136 | 0.00 | 0.00 |
| ATOM | 20857 | HB2 | HIE | 1393 | 76.253 | 66.487 | 37.641 | 0.00 | 0.00 |
| ATOM | 20858 | HB3 | HIE | 1393 | 76.077 | 64.702 | 37.422 | 0.00 | 0.00 |
| ATOM | 20859 | CG  | HIE | 1393 | 74.821 | 65.482 | 38.806 | 0.00 | 0.00 |
| ATOM | 20860 | ND1 | HIE | 1393 | 74.542 | 64.884 | 40.057 | 0.00 | 0.00 |
| ATOM | 20861 | CE1 | HIE | 1393 | 73.179 | 64.971 | 40.173 | 0.00 | 0.00 |
| ATOM | 20862 | HE1 | HIE | 1393 | 72.610 | 64.509 | 40.966 | 0.00 | 0.00 |
| ATOM | 20863 | NE2 | HIE | 1393 | 72.630 | 65.759 | 39.217 | 0.00 | 0.00 |
| ATOM | 20864 | HE2 | HIE | 1393 | 71.693 | 66.129 | 39.137 | 0.00 | 0.00 |
| ATOM | 20865 | CD2 | HIE | 1393 | 73.661 | 66.097 | 38.345 | 0.00 | 0.00 |
| ATOM | 20866 | HD2 | HIE | 1393 | 73.550 | 66.798 | 37.531 | 0.00 | 0.00 |
| ATOM | 20867 | C   | HIE | 1393 | 77.582 | 66.314 | 39.936 | 0.00 | 0.00 |
| ATOM | 20868 | O   | HIE | 1393 | 78.156 | 67.402 | 39.591 | 0.00 | 0.00 |
| ATOM | 20869 | N   | GLU | 1394 | 77.116 | 66.260 | 41.239 | 0.00 | 0.00 |
| ATOM | 20870 | H   | GLU | 1394 | 76.670 | 65.415 | 41.565 | 0.00 | 0.00 |
| ATOM | 20871 | CA  | GLU | 1394 | 77.098 | 67.465 | 42.113 | 0.00 | 0.00 |
| ATOM | 20872 | HA  | GLU | 1394 | 77.376 | 68.396 | 41.619 | 0.00 | 0.00 |
| ATOM | 20873 | CB  | GLU | 1394 | 75.600 | 67.694 | 42.509 | 0.00 | 0.00 |

|      |       |      |     |      |        |        |        |      |      |
|------|-------|------|-----|------|--------|--------|--------|------|------|
| ATOM | 20874 | HB2  | GLU | 1394 | 74.916 | 67.692 | 41.660 | 0.00 | 0.00 |
| ATOM | 20875 | HB3  | GLU | 1394 | 75.222 | 66.823 | 43.044 | 0.00 | 0.00 |
| ATOM | 20876 | CG   | GLU | 1394 | 75.362 | 68.967 | 43.285 | 0.00 | 0.00 |
| ATOM | 20877 | HG2  | GLU | 1394 | 74.417 | 68.828 | 43.809 | 0.00 | 0.00 |
| ATOM | 20878 | HG3  | GLU | 1394 | 76.164 | 69.240 | 43.971 | 0.00 | 0.00 |
| ATOM | 20879 | CD   | GLU | 1394 | 75.229 | 70.287 | 42.386 | 0.00 | 0.00 |
| ATOM | 20880 | OE1  | GLU | 1394 | 76.114 | 70.455 | 41.510 | 0.00 | 0.00 |
| ATOM | 20881 | OE2  | GLU | 1394 | 74.240 | 71.010 | 42.457 | 0.00 | 0.00 |
| ATOM | 20882 | C    | GLU | 1394 | 78.134 | 67.337 | 43.237 | 0.00 | 0.00 |
| ATOM | 20883 | O    | GLU | 1394 | 78.574 | 68.339 | 43.750 | 0.00 | 0.00 |
| ATOM | 20884 | N    | VAL | 1395 | 78.415 | 66.150 | 43.612 | 0.00 | 0.00 |
| ATOM | 20885 | H    | VAL | 1395 | 77.973 | 65.402 | 43.097 | 0.00 | 0.00 |
| ATOM | 20886 | CA   | VAL | 1395 | 79.276 | 65.858 | 44.816 | 0.00 | 0.00 |
| ATOM | 20887 | HA   | VAL | 1395 | 79.905 | 66.744 | 44.894 | 0.00 | 0.00 |
| ATOM | 20888 | CB   | VAL | 1395 | 78.327 | 65.652 | 46.062 | 0.00 | 0.00 |
| ATOM | 20889 | HB   | VAL | 1395 | 78.919 | 65.585 | 46.974 | 0.00 | 0.00 |
| ATOM | 20890 | CG1  | VAL | 1395 | 77.480 | 66.953 | 46.360 | 0.00 | 0.00 |
| ATOM | 20891 | 1HG1 | VAL | 1395 | 76.701 | 67.164 | 45.627 | 0.00 | 0.00 |
| ATOM | 20892 | 2HG1 | VAL | 1395 | 76.982 | 66.839 | 47.322 | 0.00 | 0.00 |
| ATOM | 20893 | 3HG1 | VAL | 1395 | 78.103 | 67.847 | 46.361 | 0.00 | 0.00 |
| ATOM | 20894 | CG2  | VAL | 1395 | 77.329 | 64.517 | 46.000 | 0.00 | 0.00 |
| ATOM | 20895 | 1HG2 | VAL | 1395 | 76.824 | 64.481 | 46.965 | 0.00 | 0.00 |
| ATOM | 20896 | 2HG2 | VAL | 1395 | 76.667 | 64.786 | 45.177 | 0.00 | 0.00 |
| ATOM | 20897 | 3HG2 | VAL | 1395 | 77.796 | 63.563 | 45.754 | 0.00 | 0.00 |
| ATOM | 20898 | C    | VAL | 1395 | 80.166 | 64.617 | 44.591 | 0.00 | 0.00 |
| ATOM | 20899 | O    | VAL | 1395 | 80.171 | 63.974 | 43.528 | 0.00 | 0.00 |

|      |       |      |     |      |        |        |        |      |      |
|------|-------|------|-----|------|--------|--------|--------|------|------|
| ATOM | 20900 | N    | GLY | 1396 | 80.994 | 64.188 | 45.600 | 0.00 | 0.00 |
| ATOM | 20901 | H    | GLY | 1396 | 80.883 | 64.665 | 46.483 | 0.00 | 0.00 |
| ATOM | 20902 | CA   | GLY | 1396 | 81.711 | 62.890 | 45.546 | 0.00 | 0.00 |
| ATOM | 20903 | HA2  | GLY | 1396 | 81.658 | 62.590 | 46.593 | 0.00 | 0.00 |
| ATOM | 20904 | HA3  | GLY | 1396 | 81.127 | 62.113 | 45.054 | 0.00 | 0.00 |
| ATOM | 20905 | C    | GLY | 1396 | 83.094 | 62.864 | 44.845 | 0.00 | 0.00 |
| ATOM | 20906 | O    | GLY | 1396 | 83.846 | 61.923 | 44.994 | 0.00 | 0.00 |
| ATOM | 20907 | N    | SER | 1397 | 83.519 | 63.932 | 44.130 | 0.00 | 0.00 |
| ATOM | 20908 | H    | SER | 1397 | 82.969 | 64.777 | 44.182 | 0.00 | 0.00 |
| ATOM | 20909 | CA   | SER | 1397 | 84.948 | 64.112 | 43.624 | 0.00 | 0.00 |
| ATOM | 20910 | HA   | SER | 1397 | 85.635 | 63.680 | 44.352 | 0.00 | 0.00 |
| ATOM | 20911 | CB   | SER | 1397 | 85.212 | 63.458 | 42.293 | 0.00 | 0.00 |
| ATOM | 20912 | HB2  | SER | 1397 | 86.140 | 63.844 | 41.872 | 0.00 | 0.00 |
| ATOM | 20913 | HB3  | SER | 1397 | 85.195 | 62.387 | 42.495 | 0.00 | 0.00 |
| ATOM | 20914 | OG   | SER | 1397 | 84.212 | 63.882 | 41.373 | 0.00 | 0.00 |
| ATOM | 20915 | HG   | SER | 1397 | 84.554 | 63.714 | 40.492 | 0.00 | 0.00 |
| ATOM | 20916 | C    | SER | 1397 | 85.326 | 65.623 | 43.475 | 0.00 | 0.00 |
| ATOM | 20917 | O    | SER | 1397 | 84.419 | 66.495 | 43.477 | 0.00 | 0.00 |
| ATOM | 20918 | N    | ILE | 1398 | 86.594 | 65.960 | 43.414 | 0.00 | 0.00 |
| ATOM | 20919 | H    | ILE | 1398 | 87.152 | 65.121 | 43.476 | 0.00 | 0.00 |
| ATOM | 20920 | CA   | ILE | 1398 | 87.218 | 67.321 | 43.359 | 0.00 | 0.00 |
| ATOM | 20921 | HA   | ILE | 1398 | 86.465 | 67.983 | 43.786 | 0.00 | 0.00 |
| ATOM | 20922 | CB   | ILE | 1398 | 88.597 | 67.452 | 44.076 | 0.00 | 0.00 |
| ATOM | 20923 | HB   | ILE | 1398 | 89.393 | 67.029 | 43.463 | 0.00 | 0.00 |
| ATOM | 20924 | CG2  | ILE | 1398 | 88.837 | 68.958 | 44.241 | 0.00 | 0.00 |
| ATOM | 20925 | 1HG2 | ILE | 1398 | 88.169 | 69.304 | 45.030 | 0.00 | 0.00 |



|      |       |      |     |      |        |        |        |      |      |
|------|-------|------|-----|------|--------|--------|--------|------|------|
| ATOM | 20926 | 2HG2 | ILE | 1398 | 89.864 | 69.151 | 44.549 | 0.00 | 0.00 |
| ATOM | 20927 | 3HG2 | ILE | 1398 | 88.673 | 69.392 | 43.255 | 0.00 | 0.00 |
| ATOM | 20928 | CG1  | ILE | 1398 | 88.473 | 66.767 | 45.475 | 0.00 | 0.00 |
| ATOM | 20929 | 2HG1 | ILE | 1398 | 87.663 | 67.200 | 46.064 | 0.00 | 0.00 |
| ATOM | 20930 | 3HG1 | ILE | 1398 | 88.357 | 65.684 | 45.446 | 0.00 | 0.00 |
| ATOM | 20931 | CD1  | ILE | 1398 | 89.786 | 67.061 | 46.281 | 0.00 | 0.00 |
| ATOM | 20932 | 1HD1 | ILE | 1398 | 89.943 | 66.442 | 47.164 | 0.00 | 0.00 |
| ATOM | 20933 | 2HD1 | ILE | 1398 | 90.682 | 66.926 | 45.674 | 0.00 | 0.00 |
| ATOM | 20934 | 3HD1 | ILE | 1398 | 89.707 | 68.061 | 46.708 | 0.00 | 0.00 |
| ATOM | 20935 | C    | ILE | 1398 | 87.263 | 67.768 | 41.899 | 0.00 | 0.00 |
| ATOM | 20936 | O    | ILE | 1398 | 88.331 | 67.780 | 41.272 | 0.00 | 0.00 |
| ATOM | 20937 | N    | GLU | 1399 | 86.091 | 67.941 | 41.267 | 0.00 | 0.00 |
| ATOM | 20938 | H    | GLU | 1399 | 85.265 | 68.004 | 41.845 | 0.00 | 0.00 |
| ATOM | 20939 | CA   | GLU | 1399 | 85.877 | 68.126 | 39.831 | 0.00 | 0.00 |
| ATOM | 20940 | HA   | GLU | 1399 | 86.843 | 68.323 | 39.367 | 0.00 | 0.00 |
| ATOM | 20941 | CB   | GLU | 1399 | 85.361 | 66.866 | 39.174 | 0.00 | 0.00 |
| ATOM | 20942 | HB2  | GLU | 1399 | 84.370 | 66.649 | 39.571 | 0.00 | 0.00 |
| ATOM | 20943 | HB3  | GLU | 1399 | 85.149 | 67.214 | 38.163 | 0.00 | 0.00 |
| ATOM | 20944 | CG   | GLU | 1399 | 86.394 | 65.705 | 39.266 | 0.00 | 0.00 |
| ATOM | 20945 | HG2  | GLU | 1399 | 87.353 | 66.112 | 38.945 | 0.00 | 0.00 |
| ATOM | 20946 | HG3  | GLU | 1399 | 86.546 | 65.502 | 40.326 | 0.00 | 0.00 |
| ATOM | 20947 | CD   | GLU | 1399 | 86.085 | 64.390 | 38.516 | 0.00 | 0.00 |
| ATOM | 20948 | OE1  | GLU | 1399 | 86.349 | 64.505 | 37.322 | 0.00 | 0.00 |
| ATOM | 20949 | OE2  | GLU | 1399 | 85.539 | 63.374 | 39.079 | 0.00 | 0.00 |
| ATOM | 20950 | C    | GLU | 1399 | 85.050 | 69.442 | 39.623 | 0.00 | 0.00 |
| ATOM | 20951 | O    | GLU | 1399 | 84.246 | 69.912 | 40.440 | 0.00 | 0.00 |

|      |       |      |     |      |        |        |        |      |      |
|------|-------|------|-----|------|--------|--------|--------|------|------|
| ATOM | 20952 | N    | VAL | 1400 | 85.147 | 69.996 | 38.392 | 0.00 | 0.00 |
| ATOM | 20953 | H    | VAL | 1400 | 85.697 | 69.588 | 37.650 | 0.00 | 0.00 |
| ATOM | 20954 | CA   | VAL | 1400 | 84.519 | 71.292 | 38.053 | 0.00 | 0.00 |
| ATOM | 20955 | HA   | VAL | 1400 | 84.840 | 71.996 | 38.820 | 0.00 | 0.00 |
| ATOM | 20956 | CB   | VAL | 1400 | 85.210 | 71.871 | 36.841 | 0.00 | 0.00 |
| ATOM | 20957 | HB   | VAL | 1400 | 84.725 | 72.821 | 36.616 | 0.00 | 0.00 |
| ATOM | 20958 | CG1  | VAL | 1400 | 86.729 | 72.272 | 36.897 | 0.00 | 0.00 |
| ATOM | 20959 | 1HG1 | VAL | 1400 | 87.422 | 71.466 | 37.139 | 0.00 | 0.00 |
| ATOM | 20960 | 2HG1 | VAL | 1400 | 87.052 | 72.843 | 36.027 | 0.00 | 0.00 |
| ATOM | 20961 | 3HG1 | VAL | 1400 | 86.888 | 73.025 | 37.668 | 0.00 | 0.00 |
| ATOM | 20962 | CG2  | VAL | 1400 | 85.063 | 70.868 | 35.606 | 0.00 | 0.00 |
| ATOM | 20963 | 1HG2 | VAL | 1400 | 85.691 | 69.986 | 35.735 | 0.00 | 0.00 |
| ATOM | 20964 | 2HG2 | VAL | 1400 | 84.043 | 70.485 | 35.606 | 0.00 | 0.00 |
| ATOM | 20965 | 3HG2 | VAL | 1400 | 85.412 | 71.389 | 34.715 | 0.00 | 0.00 |
| ATOM | 20966 | C    | VAL | 1400 | 82.970 | 71.364 | 38.032 | 0.00 | 0.00 |
| ATOM | 20967 | O    | VAL | 1400 | 82.299 | 70.424 | 37.661 | 0.00 | 0.00 |
| ATOM | 20968 | N    | GLY | 1401 | 82.487 | 72.434 | 38.647 | 0.00 | 0.00 |
| ATOM | 20969 | H    | GLY | 1401 | 83.100 | 73.114 | 39.073 | 0.00 | 0.00 |
| ATOM | 20970 | CA   | GLY | 1401 | 81.054 | 72.794 | 38.702 | 0.00 | 0.00 |
| ATOM | 20971 | HA2  | GLY | 1401 | 80.920 | 73.871 | 38.801 | 0.00 | 0.00 |
| ATOM | 20972 | HA3  | GLY | 1401 | 80.478 | 72.420 | 37.856 | 0.00 | 0.00 |
| ATOM | 20973 | C    | GLY | 1401 | 80.318 | 72.056 | 39.862 | 0.00 | 0.00 |
| ATOM | 20974 | O    | GLY | 1401 | 79.098 | 72.377 | 40.095 | 0.00 | 0.00 |
| ATOM | 20975 | N    | LYS | 1402 | 80.993 | 71.223 | 40.581 | 0.00 | 0.00 |
| ATOM | 20976 | H    | LYS | 1402 | 81.955 | 71.121 | 40.292 | 0.00 | 0.00 |
| ATOM | 20977 | CA   | LYS | 1402 | 80.470 | 70.521 | 41.818 | 0.00 | 0.00 |

|            |     |     |      |        |        |        |      |      |
|------------|-----|-----|------|--------|--------|--------|------|------|
| ATOM 20978 | HA  | LYS | 1402 | 79.440 | 70.200 | 41.661 | 0.00 | 0.00 |
| ATOM 20979 | CB  | LYS | 1402 | 81.350 | 69.357 | 42.254 | 0.00 | 0.00 |
| ATOM 20980 | HB2 | LYS | 1402 | 82.347 | 69.740 | 42.471 | 0.00 | 0.00 |
| ATOM 20981 | HB3 | LYS | 1402 | 80.924 | 68.882 | 43.138 | 0.00 | 0.00 |
| ATOM 20982 | CG  | LYS | 1402 | 81.403 | 68.301 | 41.109 | 0.00 | 0.00 |
| ATOM 20983 | HG2 | LYS | 1402 | 80.369 | 68.181 | 40.787 | 0.00 | 0.00 |
| ATOM 20984 | HG3 | LYS | 1402 | 81.933 | 68.797 | 40.295 | 0.00 | 0.00 |
| ATOM 20985 | CD  | LYS | 1402 | 82.009 | 66.950 | 41.423 | 0.00 | 0.00 |
| ATOM 20986 | HD2 | LYS | 1402 | 83.062 | 66.993 | 41.147 | 0.00 | 0.00 |
| ATOM 20987 | HD3 | LYS | 1402 | 82.005 | 66.825 | 42.506 | 0.00 | 0.00 |
| ATOM 20988 | CE  | LYS | 1402 | 81.318 | 65.909 | 40.504 | 0.00 | 0.00 |
| ATOM 20989 | HE2 | LYS | 1402 | 80.251 | 66.128 | 40.466 | 0.00 | 0.00 |
| ATOM 20990 | HE3 | LYS | 1402 | 81.661 | 66.118 | 39.491 | 0.00 | 0.00 |
| ATOM 20991 | NZ  | LYS | 1402 | 81.639 | 64.584 | 40.936 | 0.00 | 0.00 |
| ATOM 20992 | HZ1 | LYS | 1402 | 81.293 | 64.376 | 41.862 | 0.00 | 0.00 |
| ATOM 20993 | HZ2 | LYS | 1402 | 81.082 | 64.009 | 40.320 | 0.00 | 0.00 |
| ATOM 20994 | HZ3 | LYS | 1402 | 82.616 | 64.413 | 40.747 | 0.00 | 0.00 |
| ATOM 20995 | C   | LYS | 1402 | 80.389 | 71.547 | 42.982 | 0.00 | 0.00 |
| ATOM 20996 | O   | LYS | 1402 | 81.174 | 72.447 | 43.075 | 0.00 | 0.00 |
| ATOM 20997 | N   | LEU | 1403 | 79.458 | 71.267 | 43.904 | 0.00 | 0.00 |
| ATOM 20998 | H   | LEU | 1403 | 78.883 | 70.439 | 43.846 | 0.00 | 0.00 |
| ATOM 20999 | CA  | LEU | 1403 | 79.394 | 72.015 | 45.181 | 0.00 | 0.00 |
| ATOM 21000 | HA  | LEU | 1403 | 79.242 | 73.062 | 44.918 | 0.00 | 0.00 |
| ATOM 21001 | CB  | LEU | 1403 | 78.185 | 71.439 | 45.992 | 0.00 | 0.00 |
| ATOM 21002 | HB2 | LEU | 1403 | 77.323 | 71.580 | 45.340 | 0.00 | 0.00 |
| ATOM 21003 | HB3 | LEU | 1403 | 78.321 | 70.364 | 46.114 | 0.00 | 0.00 |

|            |      |     |      |        |        |        |      |      |
|------------|------|-----|------|--------|--------|--------|------|------|
| ATOM 21004 | CG   | LEU | 1403 | 77.836 | 72.038 | 47.279 | 0.00 | 0.00 |
| ATOM 21005 | HG   | LEU | 1403 | 78.759 | 72.074 | 47.858 | 0.00 | 0.00 |
| ATOM 21006 | CD1  | LEU | 1403 | 77.118 | 73.433 | 47.252 | 0.00 | 0.00 |
| ATOM 21007 | 1HD1 | LEU | 1403 | 76.250 | 73.453 | 46.594 | 0.00 | 0.00 |
| ATOM 21008 | 2HD1 | LEU | 1403 | 76.840 | 73.787 | 48.245 | 0.00 | 0.00 |
| ATOM 21009 | 3HD1 | LEU | 1403 | 77.778 | 74.241 | 46.937 | 0.00 | 0.00 |
| ATOM 21010 | CD2  | LEU | 1403 | 76.939 | 71.195 | 48.083 | 0.00 | 0.00 |
| ATOM 21011 | 1HD2 | LEU | 1403 | 76.045 | 70.868 | 47.553 | 0.00 | 0.00 |
| ATOM 21012 | 2HD2 | LEU | 1403 | 77.489 | 70.270 | 48.255 | 0.00 | 0.00 |
| ATOM 21013 | 3HD2 | LEU | 1403 | 76.658 | 71.745 | 48.981 | 0.00 | 0.00 |
| ATOM 21014 | C    | LEU | 1403 | 80.732 | 71.817 | 45.885 | 0.00 | 0.00 |
| ATOM 21015 | O    | LEU | 1403 | 81.210 | 70.675 | 45.947 | 0.00 | 0.00 |
| ATOM 21016 | N    | ALA | 1404 | 81.347 | 72.860 | 46.417 | 0.00 | 0.00 |
| ATOM 21017 | H    | ALA | 1404 | 80.868 | 73.746 | 46.338 | 0.00 | 0.00 |
| ATOM 21018 | CA   | ALA | 1404 | 82.659 | 72.771 | 47.055 | 0.00 | 0.00 |
| ATOM 21019 | HA   | ALA | 1404 | 83.300 | 72.130 | 46.449 | 0.00 | 0.00 |
| ATOM 21020 | CB   | ALA | 1404 | 83.199 | 74.141 | 47.058 | 0.00 | 0.00 |
| ATOM 21021 | HB1  | ALA | 1404 | 83.314 | 74.535 | 46.048 | 0.00 | 0.00 |
| ATOM 21022 | HB2  | ALA | 1404 | 82.470 | 74.766 | 47.572 | 0.00 | 0.00 |
| ATOM 21023 | HB3  | ALA | 1404 | 84.157 | 74.198 | 47.574 | 0.00 | 0.00 |
| ATOM 21024 | C    | ALA | 1404 | 82.552 | 72.091 | 48.452 | 0.00 | 0.00 |
| ATOM 21025 | O    | ALA | 1404 | 82.849 | 72.635 | 49.524 | 0.00 | 0.00 |
| ATOM 21026 | N    | ASP | 1405 | 82.162 | 70.799 | 48.547 | 0.00 | 0.00 |
| ATOM 21027 | H    | ASP | 1405 | 81.670 | 70.449 | 47.737 | 0.00 | 0.00 |
| ATOM 21028 | CA   | ASP | 1405 | 82.386 | 69.889 | 49.658 | 0.00 | 0.00 |
| ATOM 21029 | HA   | ASP | 1405 | 82.273 | 70.438 | 50.593 | 0.00 | 0.00 |

|            |      |     |      |        |        |        |      |      |
|------------|------|-----|------|--------|--------|--------|------|------|
| ATOM 21030 | CB   | ASP | 1405 | 81.332 | 68.780 | 49.725 | 0.00 | 0.00 |
| ATOM 21031 | HB2  | ASP | 1405 | 81.235 | 68.462 | 48.687 | 0.00 | 0.00 |
| ATOM 21032 | HB3  | ASP | 1405 | 81.667 | 67.960 | 50.360 | 0.00 | 0.00 |
| ATOM 21033 | CG   | ASP | 1405 | 80.006 | 69.315 | 50.294 | 0.00 | 0.00 |
| ATOM 21034 | OD1  | ASP | 1405 | 79.714 | 70.531 | 50.458 | 0.00 | 0.00 |
| ATOM 21035 | OD2  | ASP | 1405 | 79.114 | 68.403 | 50.438 | 0.00 | 0.00 |
| ATOM 21036 | C    | ASP | 1405 | 83.760 | 69.307 | 49.701 | 0.00 | 0.00 |
| ATOM 21037 | O    | ASP | 1405 | 83.984 | 68.181 | 49.334 | 0.00 | 0.00 |
| ATOM 21038 | N    | LEU | 1406 | 84.655 | 69.979 | 50.427 | 0.00 | 0.00 |
| ATOM 21039 | H    | LEU | 1406 | 84.339 | 70.815 | 50.896 | 0.00 | 0.00 |
| ATOM 21040 | CA   | LEU | 1406 | 86.082 | 69.589 | 50.619 | 0.00 | 0.00 |
| ATOM 21041 | HA   | LEU | 1406 | 86.278 | 68.674 | 50.059 | 0.00 | 0.00 |
| ATOM 21042 | CB   | LEU | 1406 | 87.076 | 70.604 | 49.998 | 0.00 | 0.00 |
| ATOM 21043 | HB2  | LEU | 1406 | 87.127 | 71.504 | 50.611 | 0.00 | 0.00 |
| ATOM 21044 | HB3  | LEU | 1406 | 88.042 | 70.124 | 50.151 | 0.00 | 0.00 |
| ATOM 21045 | CG   | LEU | 1406 | 86.838 | 70.957 | 48.529 | 0.00 | 0.00 |
| ATOM 21046 | HG   | LEU | 1406 | 85.842 | 71.399 | 48.560 | 0.00 | 0.00 |
| ATOM 21047 | CD1  | LEU | 1406 | 87.686 | 72.061 | 47.913 | 0.00 | 0.00 |
| ATOM 21048 | 1HD1 | LEU | 1406 | 88.679 | 71.618 | 47.832 | 0.00 | 0.00 |
| ATOM 21049 | 2HD1 | LEU | 1406 | 87.187 | 72.471 | 47.035 | 0.00 | 0.00 |
| ATOM 21050 | 3HD1 | LEU | 1406 | 87.830 | 72.883 | 48.613 | 0.00 | 0.00 |
| ATOM 21051 | CD2  | LEU | 1406 | 86.818 | 69.811 | 47.538 | 0.00 | 0.00 |
| ATOM 21052 | 1HD2 | LEU | 1406 | 86.086 | 69.116 | 47.949 | 0.00 | 0.00 |
| ATOM 21053 | 2HD2 | LEU | 1406 | 86.423 | 70.073 | 46.556 | 0.00 | 0.00 |
| ATOM 21054 | 3HD2 | LEU | 1406 | 87.736 | 69.229 | 47.447 | 0.00 | 0.00 |
| ATOM 21055 | C    | LEU | 1406 | 86.483 | 69.368 | 52.075 | 0.00 | 0.00 |

|      |       |      |     |      |        |        |        |      |      |
|------|-------|------|-----|------|--------|--------|--------|------|------|
| ATOM | 21056 | O    | LEU | 1406 | 86.020 | 70.098 | 52.979 | 0.00 | 0.00 |
| ATOM | 21057 | N    | VAL | 1407 | 87.365 | 68.375 | 52.318 | 0.00 | 0.00 |
| ATOM | 21058 | H    | VAL | 1407 | 87.777 | 67.887 | 51.535 | 0.00 | 0.00 |
| ATOM | 21059 | CA   | VAL | 1407 | 87.737 | 67.937 | 53.603 | 0.00 | 0.00 |
| ATOM | 21060 | HA   | VAL | 1407 | 87.462 | 68.725 | 54.304 | 0.00 | 0.00 |
| ATOM | 21061 | CB   | VAL | 1407 | 86.966 | 66.642 | 53.921 | 0.00 | 0.00 |
| ATOM | 21062 | HB   | VAL | 1407 | 87.105 | 65.945 | 53.094 | 0.00 | 0.00 |
| ATOM | 21063 | CG1  | VAL | 1407 | 87.326 | 66.002 | 55.239 | 0.00 | 0.00 |
| ATOM | 21064 | 1HG1 | VAL | 1407 | 86.746 | 65.083 | 55.329 | 0.00 | 0.00 |
| ATOM | 21065 | 2HG1 | VAL | 1407 | 88.395 | 65.790 | 55.267 | 0.00 | 0.00 |
| ATOM | 21066 | 3HG1 | VAL | 1407 | 87.044 | 66.598 | 56.107 | 0.00 | 0.00 |
| ATOM | 21067 | CG2  | VAL | 1407 | 85.507 | 66.997 | 54.009 | 0.00 | 0.00 |
| ATOM | 21068 | 1HG2 | VAL | 1407 | 85.206 | 67.390 | 53.038 | 0.00 | 0.00 |
| ATOM | 21069 | 2HG2 | VAL | 1407 | 84.878 | 66.135 | 54.232 | 0.00 | 0.00 |
| ATOM | 21070 | 3HG2 | VAL | 1407 | 85.408 | 67.854 | 54.676 | 0.00 | 0.00 |
| ATOM | 21071 | C    | VAL | 1407 | 89.276 | 67.755 | 53.621 | 0.00 | 0.00 |
| ATOM | 21072 | O    | VAL | 1407 | 89.956 | 67.360 | 52.706 | 0.00 | 0.00 |
| ATOM | 21073 | N    | VAL | 1408 | 89.876 | 68.194 | 54.826 | 0.00 | 0.00 |
| ATOM | 21074 | H    | VAL | 1408 | 89.317 | 68.511 | 55.605 | 0.00 | 0.00 |
| ATOM | 21075 | CA   | VAL | 1408 | 91.333 | 68.419 | 54.839 | 0.00 | 0.00 |
| ATOM | 21076 | HA   | VAL | 1408 | 91.819 | 68.019 | 53.949 | 0.00 | 0.00 |
| ATOM | 21077 | CB   | VAL | 1408 | 91.641 | 69.989 | 54.924 | 0.00 | 0.00 |
| ATOM | 21078 | HB   | VAL | 1408 | 91.577 | 70.258 | 55.978 | 0.00 | 0.00 |
| ATOM | 21079 | CG1  | VAL | 1408 | 92.957 | 70.357 | 54.321 | 0.00 | 0.00 |
| ATOM | 21080 | 1HG1 | VAL | 1408 | 93.072 | 71.433 | 54.452 | 0.00 | 0.00 |
| ATOM | 21081 | 2HG1 | VAL | 1408 | 93.759 | 69.902 | 54.901 | 0.00 | 0.00 |

|      |       |      |     |      |        |        |        |      |      |
|------|-------|------|-----|------|--------|--------|--------|------|------|
| ATOM | 21082 | 3HG1 | VAL | 1408 | 93.088 | 70.070 | 53.278 | 0.00 | 0.00 |
| ATOM | 21083 | CG2  | VAL | 1408 | 90.575 | 70.870 | 54.237 | 0.00 | 0.00 |
| ATOM | 21084 | 1HG2 | VAL | 1408 | 90.555 | 70.618 | 53.177 | 0.00 | 0.00 |
| ATOM | 21085 | 2HG2 | VAL | 1408 | 89.642 | 70.623 | 54.744 | 0.00 | 0.00 |
| ATOM | 21086 | 3HG2 | VAL | 1408 | 90.795 | 71.915 | 54.455 | 0.00 | 0.00 |
| ATOM | 21087 | C    | VAL | 1408 | 91.915 | 67.678 | 56.120 | 0.00 | 0.00 |
| ATOM | 21088 | O    | VAL | 1408 | 91.339 | 67.739 | 57.197 | 0.00 | 0.00 |
| ATOM | 21089 | N    | TRP | 1409 | 93.094 | 67.045 | 55.965 | 0.00 | 0.00 |
| ATOM | 21090 | H    | TRP | 1409 | 93.520 | 67.106 | 55.051 | 0.00 | 0.00 |
| ATOM | 21091 | CA   | TRP | 1409 | 93.648 | 66.092 | 56.919 | 0.00 | 0.00 |
| ATOM | 21092 | HA   | TRP | 1409 | 93.095 | 66.228 | 57.849 | 0.00 | 0.00 |
| ATOM | 21093 | CB   | TRP | 1409 | 93.475 | 64.701 | 56.373 | 0.00 | 0.00 |
| ATOM | 21094 | HB2  | TRP | 1409 | 94.281 | 64.688 | 55.639 | 0.00 | 0.00 |
| ATOM | 21095 | HB3  | TRP | 1409 | 93.685 | 63.954 | 57.139 | 0.00 | 0.00 |
| ATOM | 21096 | CG   | TRP | 1409 | 92.172 | 64.342 | 55.708 | 0.00 | 0.00 |
| ATOM | 21097 | CD1  | TRP | 1409 | 91.882 | 64.480 | 54.416 | 0.00 | 0.00 |
| ATOM | 21098 | HD1  | TRP | 1409 | 92.490 | 64.788 | 53.579 | 0.00 | 0.00 |
| ATOM | 21099 | NE1  | TRP | 1409 | 90.622 | 63.953 | 54.172 | 0.00 | 0.00 |
| ATOM | 21100 | HE1  | TRP | 1409 | 90.111 | 64.060 | 53.307 | 0.00 | 0.00 |
| ATOM | 21101 | CE2  | TRP | 1409 | 90.176 | 63.231 | 55.275 | 0.00 | 0.00 |
| ATOM | 21102 | CZ2  | TRP | 1409 | 89.055 | 62.405 | 55.424 | 0.00 | 0.00 |
| ATOM | 21103 | HZ2  | TRP | 1409 | 88.370 | 62.145 | 54.631 | 0.00 | 0.00 |
| ATOM | 21104 | CH2  | TRP | 1409 | 88.777 | 61.944 | 56.698 | 0.00 | 0.00 |
| ATOM | 21105 | HH2  | TRP | 1409 | 87.855 | 61.410 | 56.873 | 0.00 | 0.00 |
| ATOM | 21106 | CZ3  | TRP | 1409 | 89.687 | 62.205 | 57.741 | 0.00 | 0.00 |
| ATOM | 21107 | HZ3  | TRP | 1409 | 89.385 | 61.836 | 58.710 | 0.00 | 0.00 |

|      |       |     |     |      |         |        |        |      |      |
|------|-------|-----|-----|------|---------|--------|--------|------|------|
| ATOM | 21108 | CE3 | TRP | 1409 | 90.754  | 63.047 | 57.581 | 0.00 | 0.00 |
| ATOM | 21109 | HE3 | TRP | 1409 | 91.279  | 63.458 | 58.430 | 0.00 | 0.00 |
| ATOM | 21110 | CD2 | TRP | 1409 | 91.050  | 63.549 | 56.291 | 0.00 | 0.00 |
| ATOM | 21111 | C   | TRP | 1409 | 95.089  | 66.309 | 57.220 | 0.00 | 0.00 |
| ATOM | 21112 | O   | TRP | 1409 | 95.805  | 66.436 | 56.275 | 0.00 | 0.00 |
| ATOM | 21113 | N   | SER | 1410 | 95.554  | 66.241 | 58.453 | 0.00 | 0.00 |
| ATOM | 21114 | H   | SER | 1410 | 94.889  | 66.085 | 59.198 | 0.00 | 0.00 |
| ATOM | 21115 | CA  | SER | 1410 | 96.946  | 66.016 | 58.748 | 0.00 | 0.00 |
| ATOM | 21116 | HA  | SER | 1410 | 97.532  | 66.744 | 58.188 | 0.00 | 0.00 |
| ATOM | 21117 | CB  | SER | 1410 | 97.281  | 66.278 | 60.211 | 0.00 | 0.00 |
| ATOM | 21118 | HB2 | SER | 1410 | 97.519  | 67.309 | 60.472 | 0.00 | 0.00 |
| ATOM | 21119 | HB3 | SER | 1410 | 96.400  | 66.033 | 60.805 | 0.00 | 0.00 |
| ATOM | 21120 | OG  | SER | 1410 | 98.250  | 65.448 | 60.706 | 0.00 | 0.00 |
| ATOM | 21121 | HG  | SER | 1410 | 98.761  | 65.758 | 61.457 | 0.00 | 0.00 |
| ATOM | 21122 | C   | SER | 1410 | 97.346  | 64.642 | 58.230 | 0.00 | 0.00 |
| ATOM | 21123 | O   | SER | 1410 | 96.469  | 63.774 | 58.217 | 0.00 | 0.00 |
| ATOM | 21124 | N   | PRO | 1411 | 98.567  | 64.360 | 57.671 | 0.00 | 0.00 |
| ATOM | 21125 | CD  | PRO | 1411 | 99.637  | 65.347 | 57.393 | 0.00 | 0.00 |
| ATOM | 21126 | HD2 | PRO | 1411 | 100.360 | 65.478 | 58.198 | 0.00 | 0.00 |
| ATOM | 21127 | HD3 | PRO | 1411 | 99.246  | 66.358 | 57.282 | 0.00 | 0.00 |
| ATOM | 21128 | CG  | PRO | 1411 | 100.334 | 64.798 | 56.191 | 0.00 | 0.00 |
| ATOM | 21129 | HG2 | PRO | 1411 | 99.753  | 65.151 | 55.339 | 0.00 | 0.00 |
| ATOM | 21130 | HG3 | PRO | 1411 | 101.361 | 65.161 | 56.218 | 0.00 | 0.00 |
| ATOM | 21131 | CB  | PRO | 1411 | 100.136 | 63.250 | 56.291 | 0.00 | 0.00 |
| ATOM | 21132 | HB2 | PRO | 1411 | 99.829  | 62.791 | 55.351 | 0.00 | 0.00 |
| ATOM | 21133 | HB3 | PRO | 1411 | 100.979 | 62.657 | 56.646 | 0.00 | 0.00 |



|      |       |     |     |      |         |        |        |      |      |
|------|-------|-----|-----|------|---------|--------|--------|------|------|
| ATOM | 21134 | CA  | PRO | 1411 | 99.012  | 62.968 | 57.315 | 0.00 | 0.00 |
| ATOM | 21135 | HA  | PRO | 1411 | 98.233  | 62.451 | 56.754 | 0.00 | 0.00 |
| ATOM | 21136 | C   | PRO | 1411 | 99.378  | 61.984 | 58.518 | 0.00 | 0.00 |
| ATOM | 21137 | O   | PRO | 1411 | 99.222  | 60.777 | 58.362 | 0.00 | 0.00 |
| ATOM | 21138 | N   | ALA | 1412 | 99.566  | 62.533 | 59.678 | 0.00 | 0.00 |
| ATOM | 21139 | H   | ALA | 1412 | 99.562  | 63.541 | 59.742 | 0.00 | 0.00 |
| ATOM | 21140 | CA  | ALA | 1412 | 99.513  | 61.710 | 60.862 | 0.00 | 0.00 |
| ATOM | 21141 | HA  | ALA | 1412 | 100.115 | 60.803 | 60.809 | 0.00 | 0.00 |
| ATOM | 21142 | CB  | ALA | 1412 | 100.128 | 62.528 | 61.937 | 0.00 | 0.00 |
| ATOM | 21143 | HB1 | ALA | 1412 | 101.138 | 62.802 | 61.630 | 0.00 | 0.00 |
| ATOM | 21144 | HB2 | ALA | 1412 | 99.477  | 63.372 | 62.164 | 0.00 | 0.00 |
| ATOM | 21145 | HB3 | ALA | 1412 | 100.189 | 62.025 | 62.902 | 0.00 | 0.00 |
| ATOM | 21146 | C   | ALA | 1412 | 98.046  | 61.297 | 61.271 | 0.00 | 0.00 |
| ATOM | 21147 | O   | ALA | 1412 | 97.783  | 60.273 | 61.969 | 0.00 | 0.00 |
| ATOM | 21148 | N   | PHE | 1413 | 97.109  | 62.170 | 60.966 | 0.00 | 0.00 |
| ATOM | 21149 | H   | PHE | 1413 | 97.403  | 63.095 | 60.687 | 0.00 | 0.00 |
| ATOM | 21150 | CA  | PHE | 1413 | 95.658  | 61.997 | 61.282 | 0.00 | 0.00 |
| ATOM | 21151 | HA  | PHE | 1413 | 95.620  | 61.136 | 61.950 | 0.00 | 0.00 |
| ATOM | 21152 | CB  | PHE | 1413 | 95.137  | 63.203 | 62.207 | 0.00 | 0.00 |
| ATOM | 21153 | HB2 | PHE | 1413 | 95.030  | 64.108 | 61.609 | 0.00 | 0.00 |
| ATOM | 21154 | HB3 | PHE | 1413 | 94.152  | 62.877 | 62.541 | 0.00 | 0.00 |
| ATOM | 21155 | CG  | PHE | 1413 | 95.957  | 63.311 | 63.458 | 0.00 | 0.00 |
| ATOM | 21156 | CD1 | PHE | 1413 | 95.754  | 62.357 | 64.435 | 0.00 | 0.00 |
| ATOM | 21157 | HD1 | PHE | 1413 | 94.869  | 61.746 | 64.332 | 0.00 | 0.00 |
| ATOM | 21158 | CE1 | PHE | 1413 | 96.468  | 62.384 | 65.609 | 0.00 | 0.00 |
| ATOM | 21159 | HE1 | PHE | 1413 | 96.218  | 61.727 | 66.429 | 0.00 | 0.00 |

|      |       |     |     |      |        |        |        |      |      |
|------|-------|-----|-----|------|--------|--------|--------|------|------|
| ATOM | 21160 | CZ  | PHE | 1413 | 97.492 | 63.284 | 65.800 | 0.00 | 0.00 |
| ATOM | 21161 | HZ  | PHE | 1413 | 97.996 | 63.286 | 66.755 | 0.00 | 0.00 |
| ATOM | 21162 | CE2 | PHE | 1413 | 97.788 | 64.197 | 64.811 | 0.00 | 0.00 |
| ATOM | 21163 | HE2 | PHE | 1413 | 98.551 | 64.952 | 64.927 | 0.00 | 0.00 |
| ATOM | 21164 | CD2 | PHE | 1413 | 97.056 | 64.205 | 63.609 | 0.00 | 0.00 |
| ATOM | 21165 | HD2 | PHE | 1413 | 97.283 | 65.058 | 62.987 | 0.00 | 0.00 |
| ATOM | 21166 | C   | PHE | 1413 | 94.901 | 61.492 | 60.061 | 0.00 | 0.00 |
| ATOM | 21167 | O   | PHE | 1413 | 93.643 | 61.401 | 60.202 | 0.00 | 0.00 |
| ATOM | 21168 | N   | PHE | 1414 | 95.563 | 61.023 | 58.959 | 0.00 | 0.00 |
| ATOM | 21169 | H   | PHE | 1414 | 96.546 | 60.790 | 58.993 | 0.00 | 0.00 |
| ATOM | 21170 | CA  | PHE | 1414 | 94.889 | 60.665 | 57.753 | 0.00 | 0.00 |
| ATOM | 21171 | HA  | PHE | 1414 | 94.378 | 61.605 | 57.544 | 0.00 | 0.00 |
| ATOM | 21172 | CB  | PHE | 1414 | 95.833 | 60.515 | 56.546 | 0.00 | 0.00 |
| ATOM | 21173 | HB2 | PHE | 1414 | 96.238 | 61.485 | 56.258 | 0.00 | 0.00 |
| ATOM | 21174 | HB3 | PHE | 1414 | 96.651 | 59.843 | 56.806 | 0.00 | 0.00 |
| ATOM | 21175 | CG  | PHE | 1414 | 95.249 | 59.787 | 55.350 | 0.00 | 0.00 |
| ATOM | 21176 | CD1 | PHE | 1414 | 94.790 | 60.522 | 54.229 | 0.00 | 0.00 |
| ATOM | 21177 | HD1 | PHE | 1414 | 94.810 | 61.600 | 54.284 | 0.00 | 0.00 |
| ATOM | 21178 | CE1 | PHE | 1414 | 94.208 | 59.854 | 53.105 | 0.00 | 0.00 |
| ATOM | 21179 | HE1 | PHE | 1414 | 93.586 | 60.394 | 52.406 | 0.00 | 0.00 |
| ATOM | 21180 | CZ  | PHE | 1414 | 94.102 | 58.479 | 53.117 | 0.00 | 0.00 |
| ATOM | 21181 | HZ  | PHE | 1414 | 93.683 | 57.880 | 52.322 | 0.00 | 0.00 |
| ATOM | 21182 | CE2 | PHE | 1414 | 94.538 | 57.729 | 54.206 | 0.00 | 0.00 |
| ATOM | 21183 | HE2 | PHE | 1414 | 94.370 | 56.664 | 54.278 | 0.00 | 0.00 |
| ATOM | 21184 | CD2 | PHE | 1414 | 95.082 | 58.390 | 55.330 | 0.00 | 0.00 |
| ATOM | 21185 | HD2 | PHE | 1414 | 95.415 | 57.772 | 56.151 | 0.00 | 0.00 |

|      |       |      |     |      |        |        |        |      |      |
|------|-------|------|-----|------|--------|--------|--------|------|------|
| ATOM | 21186 | C    | PHE | 1414 | 93.746 | 59.603 | 57.876 | 0.00 | 0.00 |
| ATOM | 21187 | O    | PHE | 1414 | 94.038 | 58.523 | 58.245 | 0.00 | 0.00 |
| ATOM | 21188 | N    | GLY | 1415 | 92.581 | 60.094 | 57.331 | 0.00 | 0.00 |
| ATOM | 21189 | H    | GLY | 1415 | 92.632 | 60.963 | 56.819 | 0.00 | 0.00 |
| ATOM | 21190 | CA   | GLY | 1415 | 91.256 | 59.358 | 57.319 | 0.00 | 0.00 |
| ATOM | 21191 | HA2  | GLY | 1415 | 90.537 | 59.971 | 56.775 | 0.00 | 0.00 |
| ATOM | 21192 | HA3  | GLY | 1415 | 91.359 | 58.372 | 56.867 | 0.00 | 0.00 |
| ATOM | 21193 | C    | GLY | 1415 | 90.559 | 59.136 | 58.647 | 0.00 | 0.00 |
| ATOM | 21194 | O    | GLY | 1415 | 89.483 | 58.642 | 58.633 | 0.00 | 0.00 |
| ATOM | 21195 | N    | VAL | 1416 | 91.217 | 59.547 | 59.771 | 0.00 | 0.00 |
| ATOM | 21196 | H    | VAL | 1416 | 92.205 | 59.752 | 59.716 | 0.00 | 0.00 |
| ATOM | 21197 | CA   | VAL | 1416 | 90.591 | 59.284 | 61.120 | 0.00 | 0.00 |
| ATOM | 21198 | HA   | VAL | 1416 | 89.692 | 58.668 | 61.079 | 0.00 | 0.00 |
| ATOM | 21199 | CB   | VAL | 1416 | 91.549 | 58.447 | 61.967 | 0.00 | 0.00 |
| ATOM | 21200 | HB   | VAL | 1416 | 91.654 | 57.448 | 61.542 | 0.00 | 0.00 |
| ATOM | 21201 | CG1  | VAL | 1416 | 92.964 | 58.981 | 62.102 | 0.00 | 0.00 |
| ATOM | 21202 | 1HG1 | VAL | 1416 | 93.135 | 59.914 | 62.638 | 0.00 | 0.00 |
| ATOM | 21203 | 2HG1 | VAL | 1416 | 93.655 | 58.250 | 62.524 | 0.00 | 0.00 |
| ATOM | 21204 | 3HG1 | VAL | 1416 | 93.413 | 59.041 | 61.110 | 0.00 | 0.00 |
| ATOM | 21205 | CG2  | VAL | 1416 | 90.918 | 58.221 | 63.372 | 0.00 | 0.00 |
| ATOM | 21206 | 1HG2 | VAL | 1416 | 89.997 | 57.655 | 63.229 | 0.00 | 0.00 |
| ATOM | 21207 | 2HG2 | VAL | 1416 | 91.562 | 57.714 | 64.090 | 0.00 | 0.00 |
| ATOM | 21208 | 3HG2 | VAL | 1416 | 90.702 | 59.180 | 63.844 | 0.00 | 0.00 |
| ATOM | 21209 | C    | VAL | 1416 | 90.119 | 60.547 | 61.779 | 0.00 | 0.00 |
| ATOM | 21210 | O    | VAL | 1416 | 89.036 | 60.516 | 62.377 | 0.00 | 0.00 |
| ATOM | 21211 | N    | LYS | 1417 | 90.847 | 61.697 | 61.637 | 0.00 | 0.00 |

|      |       |     |     |      |        |        |        |      |      |
|------|-------|-----|-----|------|--------|--------|--------|------|------|
| ATOM | 21212 | H   | LYS | 1417 | 91.687 | 61.678 | 61.078 | 0.00 | 0.00 |
| ATOM | 21213 | CA  | LYS | 1417 | 90.500 | 63.024 | 62.221 | 0.00 | 0.00 |
| ATOM | 21214 | HA  | LYS | 1417 | 89.414 | 63.055 | 62.302 | 0.00 | 0.00 |
| ATOM | 21215 | CB  | LYS | 1417 | 91.021 | 63.190 | 63.637 | 0.00 | 0.00 |
| ATOM | 21216 | HB2 | LYS | 1417 | 92.084 | 62.950 | 63.645 | 0.00 | 0.00 |
| ATOM | 21217 | HB3 | LYS | 1417 | 90.896 | 64.219 | 63.973 | 0.00 | 0.00 |
| ATOM | 21218 | CG  | LYS | 1417 | 90.328 | 62.349 | 64.646 | 0.00 | 0.00 |
| ATOM | 21219 | HG2 | LYS | 1417 | 89.268 | 62.521 | 64.457 | 0.00 | 0.00 |
| ATOM | 21220 | HG3 | LYS | 1417 | 90.494 | 61.293 | 64.431 | 0.00 | 0.00 |
| ATOM | 21221 | CD  | LYS | 1417 | 90.697 | 62.478 | 66.156 | 0.00 | 0.00 |
| ATOM | 21222 | HD2 | LYS | 1417 | 91.747 | 62.308 | 66.396 | 0.00 | 0.00 |
| ATOM | 21223 | HD3 | LYS | 1417 | 90.440 | 63.513 | 66.384 | 0.00 | 0.00 |
| ATOM | 21224 | CE  | LYS | 1417 | 89.938 | 61.510 | 67.023 | 0.00 | 0.00 |
| ATOM | 21225 | HE2 | LYS | 1417 | 88.859 | 61.471 | 66.872 | 0.00 | 0.00 |
| ATOM | 21226 | HE3 | LYS | 1417 | 90.192 | 60.461 | 66.878 | 0.00 | 0.00 |
| ATOM | 21227 | NZ  | LYS | 1417 | 90.231 | 61.794 | 68.449 | 0.00 | 0.00 |
| ATOM | 21228 | HZ1 | LYS | 1417 | 90.068 | 62.790 | 68.496 | 0.00 | 0.00 |
| ATOM | 21229 | HZ2 | LYS | 1417 | 89.626 | 61.384 | 69.146 | 0.00 | 0.00 |
| ATOM | 21230 | HZ3 | LYS | 1417 | 91.168 | 61.469 | 68.641 | 0.00 | 0.00 |
| ATOM | 21231 | C   | LYS | 1417 | 90.855 | 64.161 | 61.243 | 0.00 | 0.00 |
| ATOM | 21232 | O   | LYS | 1417 | 91.938 | 64.759 | 61.362 | 0.00 | 0.00 |
| ATOM | 21233 | N   | PRO | 1418 | 89.937 | 64.705 | 60.411 | 0.00 | 0.00 |
| ATOM | 21234 | CD  | PRO | 1418 | 88.534 | 64.337 | 60.301 | 0.00 | 0.00 |
| ATOM | 21235 | HD2 | PRO | 1418 | 88.033 | 64.365 | 61.269 | 0.00 | 0.00 |
| ATOM | 21236 | HD3 | PRO | 1418 | 88.482 | 63.383 | 59.776 | 0.00 | 0.00 |
| ATOM | 21237 | CG  | PRO | 1418 | 87.818 | 65.300 | 59.372 | 0.00 | 0.00 |

|      |       |         |      |        |        |        |      |      |
|------|-------|---------|------|--------|--------|--------|------|------|
| ATOM | 21238 | HG2 PRO | 1418 | 87.228 | 64.683 | 58.695 | 0.00 | 0.00 |
| ATOM | 21239 | HG3 PRO | 1418 | 87.227 | 66.015 | 59.945 | 0.00 | 0.00 |
| ATOM | 21240 | CB PRO  | 1418 | 88.920 | 65.978 | 58.546 | 0.00 | 0.00 |
| ATOM | 21241 | HB2 PRO | 1418 | 89.264 | 65.357 | 57.719 | 0.00 | 0.00 |
| ATOM | 21242 | HB3 PRO | 1418 | 88.609 | 66.976 | 58.237 | 0.00 | 0.00 |
| ATOM | 21243 | CA PRO  | 1418 | 90.133 | 65.942 | 59.551 | 0.00 | 0.00 |
| ATOM | 21244 | HA PRO  | 1418 | 90.983 | 65.839 | 58.877 | 0.00 | 0.00 |
| ATOM | 21245 | C PRO   | 1418 | 90.366 | 67.175 | 60.343 | 0.00 | 0.00 |
| ATOM | 21246 | O PRO   | 1418 | 89.602 | 67.481 | 61.258 | 0.00 | 0.00 |
| ATOM | 21247 | N ALA   | 1419 | 91.338 | 68.015 | 59.965 | 0.00 | 0.00 |
| ATOM | 21248 | H ALA   | 1419 | 91.820 | 67.680 | 59.143 | 0.00 | 0.00 |
| ATOM | 21249 | CA ALA  | 1419 | 91.560 | 69.320 | 60.520 | 0.00 | 0.00 |
| ATOM | 21250 | HA ALA  | 1419 | 91.657 | 69.242 | 61.603 | 0.00 | 0.00 |
| ATOM | 21251 | CB ALA  | 1419 | 92.969 | 69.756 | 59.979 | 0.00 | 0.00 |
| ATOM | 21252 | HB1 ALA | 1419 | 92.943 | 69.983 | 58.913 | 0.00 | 0.00 |
| ATOM | 21253 | HB2 ALA | 1419 | 93.271 | 70.730 | 60.364 | 0.00 | 0.00 |
| ATOM | 21254 | HB3 ALA | 1419 | 93.668 | 68.970 | 60.264 | 0.00 | 0.00 |
| ATOM | 21255 | C ALA   | 1419 | 90.455 | 70.355 | 60.173 | 0.00 | 0.00 |
| ATOM | 21256 | O ALA   | 1419 | 90.100 | 71.265 | 60.924 | 0.00 | 0.00 |
| ATOM | 21257 | N THR   | 1420 | 89.934 | 70.291 | 58.951 | 0.00 | 0.00 |
| ATOM | 21258 | H THR   | 1420 | 90.071 | 69.428 | 58.445 | 0.00 | 0.00 |
| ATOM | 21259 | CA THR  | 1420 | 89.059 | 71.333 | 58.415 | 0.00 | 0.00 |
| ATOM | 21260 | HA THR  | 1420 | 88.483 | 71.841 | 59.188 | 0.00 | 0.00 |
| ATOM | 21261 | CB THR  | 1420 | 89.693 | 72.394 | 57.533 | 0.00 | 0.00 |
| ATOM | 21262 | HB THR  | 1420 | 90.321 | 72.060 | 56.707 | 0.00 | 0.00 |
| ATOM | 21263 | CG2 THR | 1420 | 88.698 | 73.293 | 56.772 | 0.00 | 0.00 |

|      |       |      |     |      |        |        |        |      |      |
|------|-------|------|-----|------|--------|--------|--------|------|------|
| ATOM | 21264 | 1HG2 | THR | 1420 | 88.288 | 72.811 | 55.884 | 0.00 | 0.00 |
| ATOM | 21265 | 2HG2 | THR | 1420 | 87.862 | 73.589 | 57.406 | 0.00 | 0.00 |
| ATOM | 21266 | 3HG2 | THR | 1420 | 89.142 | 74.212 | 56.389 | 0.00 | 0.00 |
| ATOM | 21267 | OG1  | THR | 1420 | 90.538 | 73.236 | 58.299 | 0.00 | 0.00 |
| ATOM | 21268 | HG1  | THR | 1420 | 90.782 | 73.937 | 57.690 | 0.00 | 0.00 |
| ATOM | 21269 | C    | THR | 1420 | 87.975 | 70.581 | 57.576 | 0.00 | 0.00 |
| ATOM | 21270 | O    | THR | 1420 | 88.418 | 69.753 | 56.769 | 0.00 | 0.00 |
| ATOM | 21271 | N    | VAL | 1421 | 86.681 | 70.887 | 57.718 | 0.00 | 0.00 |
| ATOM | 21272 | H    | VAL | 1421 | 86.423 | 71.586 | 58.399 | 0.00 | 0.00 |
| ATOM | 21273 | CA   | VAL | 1421 | 85.553 | 70.230 | 56.933 | 0.00 | 0.00 |
| ATOM | 21274 | HA   | VAL | 1421 | 86.027 | 69.660 | 56.134 | 0.00 | 0.00 |
| ATOM | 21275 | CB   | VAL | 1421 | 84.687 | 69.214 | 57.784 | 0.00 | 0.00 |
| ATOM | 21276 | HB   | VAL | 1421 | 84.082 | 69.828 | 58.451 | 0.00 | 0.00 |
| ATOM | 21277 | CG1  | VAL | 1421 | 83.700 | 68.322 | 57.018 | 0.00 | 0.00 |
| ATOM | 21278 | 1HG1 | VAL | 1421 | 83.157 | 68.938 | 56.302 | 0.00 | 0.00 |
| ATOM | 21279 | 2HG1 | VAL | 1421 | 84.289 | 67.567 | 56.498 | 0.00 | 0.00 |
| ATOM | 21280 | 3HG1 | VAL | 1421 | 83.045 | 67.787 | 57.705 | 0.00 | 0.00 |
| ATOM | 21281 | CG2  | VAL | 1421 | 85.553 | 68.172 | 58.597 | 0.00 | 0.00 |
| ATOM | 21282 | 1HG2 | VAL | 1421 | 86.021 | 68.628 | 59.469 | 0.00 | 0.00 |
| ATOM | 21283 | 2HG2 | VAL | 1421 | 84.978 | 67.303 | 58.917 | 0.00 | 0.00 |
| ATOM | 21284 | 3HG2 | VAL | 1421 | 86.353 | 67.784 | 57.966 | 0.00 | 0.00 |
| ATOM | 21285 | C    | VAL | 1421 | 84.754 | 71.297 | 56.334 | 0.00 | 0.00 |
| ATOM | 21286 | O    | VAL | 1421 | 84.302 | 72.203 | 57.085 | 0.00 | 0.00 |
| ATOM | 21287 | N    | ILE | 1422 | 84.457 | 71.296 | 54.969 | 0.00 | 0.00 |
| ATOM | 21288 | H    | ILE | 1422 | 84.753 | 70.523 | 54.390 | 0.00 | 0.00 |
| ATOM | 21289 | CA   | ILE | 1422 | 83.669 | 72.356 | 54.313 | 0.00 | 0.00 |

|      |       |      |     |      |        |        |        |      |      |
|------|-------|------|-----|------|--------|--------|--------|------|------|
| ATOM | 21290 | HA   | ILE | 1422 | 83.483 | 73.053 | 55.130 | 0.00 | 0.00 |
| ATOM | 21291 | CB   | ILE | 1422 | 84.604 | 72.968 | 53.238 | 0.00 | 0.00 |
| ATOM | 21292 | HB   | ILE | 1422 | 84.926 | 72.134 | 52.614 | 0.00 | 0.00 |
| ATOM | 21293 | CG2  | ILE | 1422 | 83.909 | 73.983 | 52.396 | 0.00 | 0.00 |
| ATOM | 21294 | 1HG2 | ILE | 1422 | 83.590 | 74.855 | 52.968 | 0.00 | 0.00 |
| ATOM | 21295 | 2HG2 | ILE | 1422 | 84.617 | 74.254 | 51.613 | 0.00 | 0.00 |
| ATOM | 21296 | 3HG2 | ILE | 1422 | 83.074 | 73.473 | 51.915 | 0.00 | 0.00 |
| ATOM | 21297 | CG1  | ILE | 1422 | 85.738 | 73.698 | 53.931 | 0.00 | 0.00 |
| ATOM | 21298 | 2HG1 | ILE | 1422 | 85.367 | 74.614 | 54.391 | 0.00 | 0.00 |
| ATOM | 21299 | 3HG1 | ILE | 1422 | 86.262 | 73.120 | 54.692 | 0.00 | 0.00 |
| ATOM | 21300 | CD1  | ILE | 1422 | 86.865 | 74.055 | 52.930 | 0.00 | 0.00 |
| ATOM | 21301 | 1HD1 | ILE | 1422 | 86.869 | 75.091 | 52.590 | 0.00 | 0.00 |
| ATOM | 21302 | 2HD1 | ILE | 1422 | 87.780 | 73.868 | 53.493 | 0.00 | 0.00 |
| ATOM | 21303 | 3HD1 | ILE | 1422 | 86.781 | 73.445 | 52.031 | 0.00 | 0.00 |
| ATOM | 21304 | C    | ILE | 1422 | 82.333 | 71.769 | 53.726 | 0.00 | 0.00 |
| ATOM | 21305 | O    | ILE | 1422 | 82.232 | 70.606 | 53.222 | 0.00 | 0.00 |
| ATOM | 21306 | N    | LYS | 1423 | 81.350 | 72.648 | 53.755 | 0.00 | 0.00 |
| ATOM | 21307 | H    | LYS | 1423 | 81.536 | 73.531 | 54.211 | 0.00 | 0.00 |
| ATOM | 21308 | CA   | LYS | 1423 | 80.075 | 72.562 | 53.037 | 0.00 | 0.00 |
| ATOM | 21309 | HA   | LYS | 1423 | 80.068 | 71.592 | 52.540 | 0.00 | 0.00 |
| ATOM | 21310 | CB   | LYS | 1423 | 78.888 | 72.523 | 54.034 | 0.00 | 0.00 |
| ATOM | 21311 | HB2  | LYS | 1423 | 78.884 | 73.340 | 54.755 | 0.00 | 0.00 |
| ATOM | 21312 | HB3  | LYS | 1423 | 77.952 | 72.573 | 53.477 | 0.00 | 0.00 |
| ATOM | 21313 | CG   | LYS | 1423 | 78.842 | 71.182 | 54.852 | 0.00 | 0.00 |
| ATOM | 21314 | HG2  | LYS | 1423 | 77.995 | 71.112 | 55.534 | 0.00 | 0.00 |
| ATOM | 21315 | HG3  | LYS | 1423 | 79.749 | 71.149 | 55.456 | 0.00 | 0.00 |

|      |       |     |     |      |        |        |        |      |      |
|------|-------|-----|-----|------|--------|--------|--------|------|------|
| ATOM | 21316 | CD  | LYS | 1423 | 78.763 | 69.829 | 54.064 | 0.00 | 0.00 |
| ATOM | 21317 | HD2 | LYS | 1423 | 79.614 | 69.726 | 53.390 | 0.00 | 0.00 |
| ATOM | 21318 | HD3 | LYS | 1423 | 78.697 | 68.982 | 54.746 | 0.00 | 0.00 |
| ATOM | 21319 | CE  | LYS | 1423 | 77.508 | 69.846 | 53.222 | 0.00 | 0.00 |
| ATOM | 21320 | HE2 | LYS | 1423 | 77.288 | 68.799 | 53.012 | 0.00 | 0.00 |
| ATOM | 21321 | HE3 | LYS | 1423 | 76.727 | 70.216 | 53.886 | 0.00 | 0.00 |
| ATOM | 21322 | NZ  | LYS | 1423 | 77.451 | 70.488 | 51.913 | 0.00 | 0.00 |
| ATOM | 21323 | HZ1 | LYS | 1423 | 78.224 | 70.273 | 51.300 | 0.00 | 0.00 |
| ATOM | 21324 | HZ2 | LYS | 1423 | 76.580 | 70.326 | 51.427 | 0.00 | 0.00 |
| ATOM | 21325 | HZ3 | LYS | 1423 | 77.600 | 71.483 | 52.002 | 0.00 | 0.00 |
| ATOM | 21326 | C   | LYS | 1423 | 79.911 | 73.666 | 51.981 | 0.00 | 0.00 |
| ATOM | 21327 | O   | LYS | 1423 | 79.933 | 74.837 | 52.307 | 0.00 | 0.00 |
| ATOM | 21328 | N   | GLY | 1424 | 79.794 | 73.320 | 50.692 | 0.00 | 0.00 |
| ATOM | 21329 | H   | GLY | 1424 | 79.804 | 72.327 | 50.507 | 0.00 | 0.00 |
| ATOM | 21330 | CA  | GLY | 1424 | 79.387 | 74.286 | 49.653 | 0.00 | 0.00 |
| ATOM | 21331 | HA2 | GLY | 1424 | 79.538 | 73.698 | 48.747 | 0.00 | 0.00 |
| ATOM | 21332 | HA3 | GLY | 1424 | 78.325 | 74.497 | 49.773 | 0.00 | 0.00 |
| ATOM | 21333 | C   | GLY | 1424 | 80.158 | 75.645 | 49.530 | 0.00 | 0.00 |
| ATOM | 21334 | O   | GLY | 1424 | 79.482 | 76.654 | 49.249 | 0.00 | 0.00 |
| ATOM | 21335 | N   | GLY | 1425 | 81.426 | 75.666 | 49.929 | 0.00 | 0.00 |
| ATOM | 21336 | H   | GLY | 1425 | 81.647 | 74.735 | 50.251 | 0.00 | 0.00 |
| ATOM | 21337 | CA  | GLY | 1425 | 82.351 | 76.767 | 50.107 | 0.00 | 0.00 |
| ATOM | 21338 | HA2 | GLY | 1425 | 83.327 | 76.458 | 49.731 | 0.00 | 0.00 |
| ATOM | 21339 | HA3 | GLY | 1425 | 82.094 | 77.528 | 49.370 | 0.00 | 0.00 |
| ATOM | 21340 | C   | GLY | 1425 | 82.524 | 77.367 | 51.626 | 0.00 | 0.00 |
| ATOM | 21341 | O   | GLY | 1425 | 83.539 | 77.997 | 51.727 | 0.00 | 0.00 |



|      |       |      |     |      |        |        |        |      |      |
|------|-------|------|-----|------|--------|--------|--------|------|------|
| ATOM | 21342 | N    | MET | 1426 | 81.806 | 77.042 | 52.678 | 0.00 | 0.00 |
| ATOM | 21343 | H    | MET | 1426 | 81.047 | 76.382 | 52.595 | 0.00 | 0.00 |
| ATOM | 21344 | CA   | MET | 1426 | 82.287 | 77.354 | 54.056 | 0.00 | 0.00 |
| ATOM | 21345 | HA   | MET | 1426 | 83.174 | 77.986 | 54.031 | 0.00 | 0.00 |
| ATOM | 21346 | CB   | MET | 1426 | 81.193 | 78.156 | 54.757 | 0.00 | 0.00 |
| ATOM | 21347 | HB2  | MET | 1426 | 80.364 | 77.456 | 54.862 | 0.00 | 0.00 |
| ATOM | 21348 | HB3  | MET | 1426 | 81.618 | 78.430 | 55.723 | 0.00 | 0.00 |
| ATOM | 21349 | CG   | MET | 1426 | 80.678 | 79.457 | 54.190 | 0.00 | 0.00 |
| ATOM | 21350 | HG2  | MET | 1426 | 81.480 | 80.120 | 53.869 | 0.00 | 0.00 |
| ATOM | 21351 | HG3  | MET | 1426 | 80.055 | 79.161 | 53.345 | 0.00 | 0.00 |
| ATOM | 21352 | SD   | MET | 1426 | 79.558 | 80.306 | 55.403 | 0.00 | 0.00 |
| ATOM | 21353 | CE   | MET | 1426 | 80.722 | 81.525 | 56.101 | 0.00 | 0.00 |
| ATOM | 21354 | HE1  | MET | 1426 | 80.303 | 82.075 | 56.944 | 0.00 | 0.00 |
| ATOM | 21355 | HE2  | MET | 1426 | 81.543 | 80.987 | 56.576 | 0.00 | 0.00 |
| ATOM | 21356 | HE3  | MET | 1426 | 81.117 | 82.227 | 55.366 | 0.00 | 0.00 |
| ATOM | 21357 | C    | MET | 1426 | 82.698 | 76.155 | 54.969 | 0.00 | 0.00 |
| ATOM | 21358 | O    | MET | 1426 | 82.126 | 75.081 | 55.030 | 0.00 | 0.00 |
| ATOM | 21359 | N    | ILE | 1427 | 83.757 | 76.436 | 55.758 | 0.00 | 0.00 |
| ATOM | 21360 | H    | ILE | 1427 | 84.160 | 77.349 | 55.602 | 0.00 | 0.00 |
| ATOM | 21361 | CA   | ILE | 1427 | 84.210 | 75.644 | 56.869 | 0.00 | 0.00 |
| ATOM | 21362 | HA   | ILE | 1427 | 84.470 | 74.702 | 56.385 | 0.00 | 0.00 |
| ATOM | 21363 | CB   | ILE | 1427 | 85.420 | 76.168 | 57.596 | 0.00 | 0.00 |
| ATOM | 21364 | HB   | ILE | 1427 | 85.352 | 77.144 | 58.078 | 0.00 | 0.00 |
| ATOM | 21365 | CG2  | ILE | 1427 | 85.631 | 75.243 | 58.818 | 0.00 | 0.00 |
| ATOM | 21366 | 1HG2 | ILE | 1427 | 86.625 | 75.446 | 59.218 | 0.00 | 0.00 |
| ATOM | 21367 | 2HG2 | ILE | 1427 | 84.855 | 75.442 | 59.557 | 0.00 | 0.00 |

|      |       |      |     |      |        |        |        |      |      |
|------|-------|------|-----|------|--------|--------|--------|------|------|
| ATOM | 21368 | 3HG2 | ILE | 1427 | 85.563 | 74.209 | 58.480 | 0.00 | 0.00 |
| ATOM | 21369 | CG1  | ILE | 1427 | 86.635 | 76.412 | 56.710 | 0.00 | 0.00 |
| ATOM | 21370 | 2HG1 | ILE | 1427 | 86.905 | 75.432 | 56.318 | 0.00 | 0.00 |
| ATOM | 21371 | 3HG1 | ILE | 1427 | 86.279 | 77.028 | 55.885 | 0.00 | 0.00 |
| ATOM | 21372 | CD1  | ILE | 1427 | 87.755 | 77.107 | 57.340 | 0.00 | 0.00 |
| ATOM | 21373 | 1HD1 | ILE | 1427 | 88.130 | 76.541 | 58.193 | 0.00 | 0.00 |
| ATOM | 21374 | 2HD1 | ILE | 1427 | 88.662 | 77.196 | 56.741 | 0.00 | 0.00 |
| ATOM | 21375 | 3HD1 | ILE | 1427 | 87.444 | 78.118 | 57.601 | 0.00 | 0.00 |
| ATOM | 21376 | C    | ILE | 1427 | 83.070 | 75.483 | 57.783 | 0.00 | 0.00 |
| ATOM | 21377 | O    | ILE | 1427 | 82.375 | 76.392 | 58.143 | 0.00 | 0.00 |
| ATOM | 21378 | N    | ALA | 1428 | 82.628 | 74.221 | 58.033 | 0.00 | 0.00 |
| ATOM | 21379 | H    | ALA | 1428 | 83.077 | 73.491 | 57.498 | 0.00 | 0.00 |
| ATOM | 21380 | CA   | ALA | 1428 | 81.532 | 73.764 | 58.863 | 0.00 | 0.00 |
| ATOM | 21381 | HA   | ALA | 1428 | 80.989 | 74.659 | 59.165 | 0.00 | 0.00 |
| ATOM | 21382 | CB   | ALA | 1428 | 80.464 | 73.029 | 57.981 | 0.00 | 0.00 |
| ATOM | 21383 | HB1  | ALA | 1428 | 80.656 | 71.959 | 57.897 | 0.00 | 0.00 |
| ATOM | 21384 | HB2  | ALA | 1428 | 79.441 | 73.090 | 58.352 | 0.00 | 0.00 |
| ATOM | 21385 | HB3  | ALA | 1428 | 80.477 | 73.489 | 56.992 | 0.00 | 0.00 |
| ATOM | 21386 | C    | ALA | 1428 | 81.882 | 73.028 | 60.214 | 0.00 | 0.00 |
| ATOM | 21387 | O    | ALA | 1428 | 81.273 | 73.191 | 61.231 | 0.00 | 0.00 |
| ATOM | 21388 | N    | ILE | 1429 | 82.974 | 72.242 | 60.186 | 0.00 | 0.00 |
| ATOM | 21389 | H    | ILE | 1429 | 83.536 | 72.095 | 59.360 | 0.00 | 0.00 |
| ATOM | 21390 | CA   | ILE | 1429 | 83.478 | 71.762 | 61.523 | 0.00 | 0.00 |
| ATOM | 21391 | HA   | ILE | 1429 | 83.407 | 72.555 | 62.267 | 0.00 | 0.00 |
| ATOM | 21392 | CB   | ILE | 1429 | 82.509 | 70.545 | 62.008 | 0.00 | 0.00 |
| ATOM | 21393 | HB   | ILE | 1429 | 81.497 | 70.946 | 61.954 | 0.00 | 0.00 |

|      |       |      |     |      |        |        |        |      |      |
|------|-------|------|-----|------|--------|--------|--------|------|------|
| ATOM | 21394 | CG2  | ILE | 1429 | 82.692 | 69.249 | 61.164 | 0.00 | 0.00 |
| ATOM | 21395 | 1HG2 | ILE | 1429 | 82.082 | 68.448 | 61.580 | 0.00 | 0.00 |
| ATOM | 21396 | 2HG2 | ILE | 1429 | 82.348 | 69.371 | 60.137 | 0.00 | 0.00 |
| ATOM | 21397 | 3HG2 | ILE | 1429 | 83.718 | 68.890 | 61.243 | 0.00 | 0.00 |
| ATOM | 21398 | CG1  | ILE | 1429 | 82.861 | 70.198 | 63.471 | 0.00 | 0.00 |
| ATOM | 21399 | 2HG1 | ILE | 1429 | 83.641 | 69.459 | 63.660 | 0.00 | 0.00 |
| ATOM | 21400 | 3HG1 | ILE | 1429 | 83.123 | 71.069 | 64.072 | 0.00 | 0.00 |
| ATOM | 21401 | CD1  | ILE | 1429 | 81.647 | 69.553 | 64.202 | 0.00 | 0.00 |
| ATOM | 21402 | 1HD1 | ILE | 1429 | 82.073 | 69.179 | 65.133 | 0.00 | 0.00 |
| ATOM | 21403 | 2HD1 | ILE | 1429 | 80.975 | 70.384 | 64.416 | 0.00 | 0.00 |
| ATOM | 21404 | 3HD1 | ILE | 1429 | 81.178 | 68.722 | 63.675 | 0.00 | 0.00 |
| ATOM | 21405 | C    | ILE | 1429 | 84.918 | 71.337 | 61.500 | 0.00 | 0.00 |
| ATOM | 21406 | O    | ILE | 1429 | 85.407 | 70.899 | 60.459 | 0.00 | 0.00 |
| ATOM | 21407 | N    | ALA | 1430 | 85.613 | 71.581 | 62.617 | 0.00 | 0.00 |
| ATOM | 21408 | H    | ALA | 1430 | 85.095 | 72.087 | 63.321 | 0.00 | 0.00 |
| ATOM | 21409 | CA   | ALA | 1430 | 87.035 | 71.467 | 62.836 | 0.00 | 0.00 |
| ATOM | 21410 | HA   | ALA | 1430 | 87.295 | 70.635 | 62.181 | 0.00 | 0.00 |
| ATOM | 21411 | CB   | ALA | 1430 | 87.606 | 72.865 | 62.423 | 0.00 | 0.00 |
| ATOM | 21412 | HB1  | ALA | 1430 | 86.975 | 73.562 | 62.974 | 0.00 | 0.00 |
| ATOM | 21413 | HB2  | ALA | 1430 | 88.675 | 72.955 | 62.617 | 0.00 | 0.00 |
| ATOM | 21414 | HB3  | ALA | 1430 | 87.397 | 72.963 | 61.358 | 0.00 | 0.00 |
| ATOM | 21415 | C    | ALA | 1430 | 87.220 | 71.176 | 64.350 | 0.00 | 0.00 |
| ATOM | 21416 | O    | ALA | 1430 | 86.432 | 71.746 | 65.141 | 0.00 | 0.00 |
| ATOM | 21417 | N    | PRO | 1431 | 88.408 | 70.734 | 64.757 | 0.00 | 0.00 |
| ATOM | 21418 | CD   | PRO | 1431 | 89.491 | 70.158 | 63.942 | 0.00 | 0.00 |
| ATOM | 21419 | HD2  | PRO | 1431 | 90.077 | 70.956 | 63.486 | 0.00 | 0.00 |

|            |         |      |        |        |        |      |      |
|------------|---------|------|--------|--------|--------|------|------|
| ATOM 21420 | HD3 PRO | 1431 | 89.092 | 69.449 | 63.217 | 0.00 | 0.00 |
| ATOM 21421 | CG PRO  | 1431 | 90.424 | 69.422 | 64.914 | 0.00 | 0.00 |
| ATOM 21422 | HG2 PRO | 1431 | 90.458 | 68.385 | 64.579 | 0.00 | 0.00 |
| ATOM 21423 | HG3 PRO | 1431 | 91.459 | 69.763 | 64.873 | 0.00 | 0.00 |
| ATOM 21424 | CB PRO  | 1431 | 89.788 | 69.644 | 66.326 | 0.00 | 0.00 |
| ATOM 21425 | HB2 PRO | 1431 | 89.188 | 68.767 | 66.569 | 0.00 | 0.00 |
| ATOM 21426 | HB3 PRO | 1431 | 90.517 | 69.831 | 67.114 | 0.00 | 0.00 |
| ATOM 21427 | CA PRO  | 1431 | 88.787 | 70.829 | 66.070 | 0.00 | 0.00 |
| ATOM 21428 | HA PRO  | 1431 | 87.929 | 70.685 | 66.727 | 0.00 | 0.00 |
| ATOM 21429 | C PRO   | 1431 | 89.394 | 72.223 | 66.228 | 0.00 | 0.00 |
| ATOM 21430 | O PRO   | 1431 | 90.192 | 72.738 | 65.487 | 0.00 | 0.00 |
| ATOM 21431 | N MET   | 1432 | 89.211 | 72.756 | 67.425 | 0.00 | 0.00 |
| ATOM 21432 | H MET   | 1432 | 88.575 | 72.293 | 68.059 | 0.00 | 0.00 |
| ATOM 21433 | CA MET  | 1432 | 89.528 | 74.134 | 67.815 | 0.00 | 0.00 |
| ATOM 21434 | HA MET  | 1432 | 90.376 | 74.384 | 67.178 | 0.00 | 0.00 |
| ATOM 21435 | CB MET  | 1432 | 88.333 | 75.032 | 67.470 | 0.00 | 0.00 |
| ATOM 21436 | HB2 MET | 1432 | 88.174 | 74.866 | 66.405 | 0.00 | 0.00 |
| ATOM 21437 | HB3 MET | 1432 | 87.418 | 74.757 | 67.995 | 0.00 | 0.00 |
| ATOM 21438 | CG MET  | 1432 | 88.497 | 76.541 | 67.603 | 0.00 | 0.00 |
| ATOM 21439 | HG2 MET | 1432 | 87.480 | 76.924 | 67.513 | 0.00 | 0.00 |
| ATOM 21440 | HG3 MET | 1432 | 89.021 | 76.770 | 68.531 | 0.00 | 0.00 |
| ATOM 21441 | SD MET  | 1432 | 89.632 | 77.097 | 66.250 | 0.00 | 0.00 |
| ATOM 21442 | CE MET  | 1432 | 89.565 | 78.887 | 66.427 | 0.00 | 0.00 |
| ATOM 21443 | HE1 MET | 1432 | 89.933 | 79.124 | 67.426 | 0.00 | 0.00 |
| ATOM 21444 | HE2 MET | 1432 | 90.136 | 79.334 | 65.614 | 0.00 | 0.00 |
| ATOM 21445 | HE3 MET | 1432 | 88.578 | 79.335 | 66.311 | 0.00 | 0.00 |

|      |       |     |     |      |        |        |        |      |      |
|------|-------|-----|-----|------|--------|--------|--------|------|------|
| ATOM | 21446 | C   | MET | 1432 | 89.893 | 74.308 | 69.288 | 0.00 | 0.00 |
| ATOM | 21447 | O   | MET | 1432 | 89.325 | 73.698 | 70.194 | 0.00 | 0.00 |
| ATOM | 21448 | N   | GLY | 1433 | 90.678 | 75.374 | 69.605 | 0.00 | 0.00 |
| ATOM | 21449 | H   | GLY | 1433 | 90.974 | 76.008 | 68.876 | 0.00 | 0.00 |
| ATOM | 21450 | CA  | GLY | 1433 | 91.144 | 75.626 | 70.972 | 0.00 | 0.00 |
| ATOM | 21451 | HA2 | GLY | 1433 | 91.295 | 74.673 | 71.478 | 0.00 | 0.00 |
| ATOM | 21452 | HA3 | GLY | 1433 | 92.041 | 76.245 | 70.960 | 0.00 | 0.00 |
| ATOM | 21453 | C   | GLY | 1433 | 90.041 | 76.382 | 71.795 | 0.00 | 0.00 |
| ATOM | 21454 | O   | GLY | 1433 | 88.933 | 76.724 | 71.272 | 0.00 | 0.00 |
| ATOM | 21455 | N   | ASP | 1434 | 90.472 | 76.715 | 73.015 | 0.00 | 0.00 |
| ATOM | 21456 | H   | ASP | 1434 | 91.306 | 76.347 | 73.451 | 0.00 | 0.00 |
| ATOM | 21457 | CA  | ASP | 1434 | 89.652 | 77.577 | 73.951 | 0.00 | 0.00 |
| ATOM | 21458 | HA  | ASP | 1434 | 88.811 | 76.954 | 74.254 | 0.00 | 0.00 |
| ATOM | 21459 | CB  | ASP | 1434 | 90.596 | 77.792 | 75.134 | 0.00 | 0.00 |
| ATOM | 21460 | HB2 | ASP | 1434 | 90.854 | 76.874 | 75.662 | 0.00 | 0.00 |
| ATOM | 21461 | HB3 | ASP | 1434 | 91.589 | 78.062 | 74.776 | 0.00 | 0.00 |
| ATOM | 21462 | CG  | ASP | 1434 | 90.117 | 78.795 | 76.205 | 0.00 | 0.00 |
| ATOM | 21463 | OD1 | ASP | 1434 | 88.818 | 78.875 | 76.408 | 0.00 | 0.00 |
| ATOM | 21464 | OD2 | ASP | 1434 | 90.910 | 79.369 | 76.962 | 0.00 | 0.00 |
| ATOM | 21465 | C   | ASP | 1434 | 89.332 | 78.930 | 73.282 | 0.00 | 0.00 |
| ATOM | 21466 | O   | ASP | 1434 | 90.234 | 79.625 | 72.827 | 0.00 | 0.00 |
| ATOM | 21467 | N   | ILE | 1435 | 88.024 | 79.309 | 73.365 | 0.00 | 0.00 |
| ATOM | 21468 | H   | ILE | 1435 | 87.393 | 78.657 | 73.810 | 0.00 | 0.00 |
| ATOM | 21469 | CA  | ILE | 1435 | 87.348 | 80.437 | 72.816 | 0.00 | 0.00 |
| ATOM | 21470 | HA  | ILE | 1435 | 87.577 | 80.435 | 71.750 | 0.00 | 0.00 |
| ATOM | 21471 | CB  | ILE | 1435 | 85.772 | 80.401 | 73.008 | 0.00 | 0.00 |

|      |       |      |     |      |        |        |        |      |      |
|------|-------|------|-----|------|--------|--------|--------|------|------|
| ATOM | 21472 | HB   | ILE | 1435 | 85.547 | 80.213 | 74.057 | 0.00 | 0.00 |
| ATOM | 21473 | CG2  | ILE | 1435 | 84.852 | 81.605 | 72.709 | 0.00 | 0.00 |
| ATOM | 21474 | 1HG2 | ILE | 1435 | 84.684 | 81.726 | 71.638 | 0.00 | 0.00 |
| ATOM | 21475 | 2HG2 | ILE | 1435 | 83.881 | 81.448 | 73.179 | 0.00 | 0.00 |
| ATOM | 21476 | 3HG2 | ILE | 1435 | 85.352 | 82.435 | 73.208 | 0.00 | 0.00 |
| ATOM | 21477 | CG1  | ILE | 1435 | 85.276 | 79.132 | 72.286 | 0.00 | 0.00 |
| ATOM | 21478 | 2HG1 | ILE | 1435 | 85.506 | 78.213 | 72.824 | 0.00 | 0.00 |
| ATOM | 21479 | 3HG1 | ILE | 1435 | 84.188 | 79.189 | 72.314 | 0.00 | 0.00 |
| ATOM | 21480 | CD1  | ILE | 1435 | 85.805 | 78.788 | 70.829 | 0.00 | 0.00 |
| ATOM | 21481 | 1HD1 | ILE | 1435 | 86.789 | 78.321 | 70.861 | 0.00 | 0.00 |
| ATOM | 21482 | 2HD1 | ILE | 1435 | 85.102 | 78.074 | 70.399 | 0.00 | 0.00 |
| ATOM | 21483 | 3HD1 | ILE | 1435 | 85.780 | 79.641 | 70.151 | 0.00 | 0.00 |
| ATOM | 21484 | C    | ILE | 1435 | 87.843 | 81.763 | 73.408 | 0.00 | 0.00 |
| ATOM | 21485 | O    | ILE | 1435 | 87.798 | 82.840 | 72.827 | 0.00 | 0.00 |
| ATOM | 21486 | N    | ASN | 1436 | 88.282 | 81.604 | 74.707 | 0.00 | 0.00 |
| ATOM | 21487 | H    | ASN | 1436 | 88.182 | 80.757 | 75.247 | 0.00 | 0.00 |
| ATOM | 21488 | CA   | ASN | 1436 | 88.940 | 82.699 | 75.432 | 0.00 | 0.00 |
| ATOM | 21489 | HA   | ASN | 1436 | 88.380 | 83.592 | 75.157 | 0.00 | 0.00 |
| ATOM | 21490 | CB   | ASN | 1436 | 88.742 | 82.439 | 76.930 | 0.00 | 0.00 |
| ATOM | 21491 | HB2  | ASN | 1436 | 87.755 | 82.047 | 77.178 | 0.00 | 0.00 |
| ATOM | 21492 | HB3  | ASN | 1436 | 89.392 | 81.656 | 77.319 | 0.00 | 0.00 |
| ATOM | 21493 | CG   | ASN | 1436 | 89.005 | 83.662 | 77.815 | 0.00 | 0.00 |
| ATOM | 21494 | OD1  | ASN | 1436 | 88.113 | 84.475 | 77.915 | 0.00 | 0.00 |
| ATOM | 21495 | ND2  | ASN | 1436 | 90.198 | 83.849 | 78.289 | 0.00 | 0.00 |
| ATOM | 21496 | 1HD2 | ASN | 1436 | 90.416 | 84.703 | 78.782 | 0.00 | 0.00 |
| ATOM | 21497 | 2HD2 | ASN | 1436 | 90.786 | 83.039 | 78.156 | 0.00 | 0.00 |

|      |       |     |     |      |        |        |        |      |      |
|------|-------|-----|-----|------|--------|--------|--------|------|------|
| ATOM | 21498 | C   | ASN | 1436 | 90.417 | 83.063 | 75.043 | 0.00 | 0.00 |
| ATOM | 21499 | O   | ASN | 1436 | 90.818 | 84.165 | 75.282 | 0.00 | 0.00 |
| ATOM | 21500 | N   | ALA | 1437 | 91.135 | 82.144 | 74.377 | 0.00 | 0.00 |
| ATOM | 21501 | H   | ALA | 1437 | 90.876 | 81.178 | 74.236 | 0.00 | 0.00 |
| ATOM | 21502 | CA  | ALA | 1437 | 92.515 | 82.309 | 74.048 | 0.00 | 0.00 |
| ATOM | 21503 | HA  | ALA | 1437 | 92.964 | 82.611 | 74.994 | 0.00 | 0.00 |
| ATOM | 21504 | CB  | ALA | 1437 | 93.144 | 80.973 | 73.750 | 0.00 | 0.00 |
| ATOM | 21505 | HB1 | ALA | 1437 | 94.147 | 81.066 | 73.333 | 0.00 | 0.00 |
| ATOM | 21506 | HB2 | ALA | 1437 | 93.080 | 80.303 | 74.607 | 0.00 | 0.00 |
| ATOM | 21507 | HB3 | ALA | 1437 | 92.439 | 80.637 | 72.990 | 0.00 | 0.00 |
| ATOM | 21508 | C   | ALA | 1437 | 92.787 | 83.449 | 73.035 | 0.00 | 0.00 |
| ATOM | 21509 | O   | ALA | 1437 | 92.047 | 83.763 | 72.101 | 0.00 | 0.00 |
| ATOM | 21510 | N   | SER | 1438 | 94.063 | 83.886 | 73.178 | 0.00 | 0.00 |
| ATOM | 21511 | H   | SER | 1438 | 94.587 | 83.657 | 74.011 | 0.00 | 0.00 |
| ATOM | 21512 | CA  | SER | 1438 | 94.909 | 84.643 | 72.195 | 0.00 | 0.00 |
| ATOM | 21513 | HA  | SER | 1438 | 94.432 | 85.607 | 72.015 | 0.00 | 0.00 |
| ATOM | 21514 | CB  | SER | 1438 | 96.256 | 84.982 | 72.894 | 0.00 | 0.00 |
| ATOM | 21515 | HB2 | SER | 1438 | 96.860 | 85.573 | 72.206 | 0.00 | 0.00 |
| ATOM | 21516 | HB3 | SER | 1438 | 95.952 | 85.624 | 73.722 | 0.00 | 0.00 |
| ATOM | 21517 | OG  | SER | 1438 | 96.832 | 83.778 | 73.308 | 0.00 | 0.00 |
| ATOM | 21518 | HG  | SER | 1438 | 96.255 | 83.495 | 74.021 | 0.00 | 0.00 |
| ATOM | 21519 | C   | SER | 1438 | 95.160 | 84.154 | 70.763 | 0.00 | 0.00 |
| ATOM | 21520 | O   | SER | 1438 | 95.670 | 84.915 | 69.882 | 0.00 | 0.00 |
| ATOM | 21521 | N   | ILE | 1439 | 94.932 | 82.889 | 70.507 | 0.00 | 0.00 |
| ATOM | 21522 | H   | ILE | 1439 | 94.592 | 82.265 | 71.226 | 0.00 | 0.00 |
| ATOM | 21523 | CA  | ILE | 1439 | 95.436 | 82.068 | 69.358 | 0.00 | 0.00 |

|      |       |      |     |      |        |        |        |      |      |
|------|-------|------|-----|------|--------|--------|--------|------|------|
| ATOM | 21524 | HA   | ILE | 1439 | 95.507 | 82.611 | 68.416 | 0.00 | 0.00 |
| ATOM | 21525 | CB   | ILE | 1439 | 96.901 | 81.613 | 69.655 | 0.00 | 0.00 |
| ATOM | 21526 | HB   | ILE | 1439 | 97.164 | 80.807 | 68.970 | 0.00 | 0.00 |
| ATOM | 21527 | CG2  | ILE | 1439 | 97.890 | 82.767 | 69.514 | 0.00 | 0.00 |
| ATOM | 21528 | 1HG2 | ILE | 1439 | 98.912 | 82.388 | 69.510 | 0.00 | 0.00 |
| ATOM | 21529 | 2HG2 | ILE | 1439 | 97.639 | 83.288 | 68.590 | 0.00 | 0.00 |
| ATOM | 21530 | 3HG2 | ILE | 1439 | 97.750 | 83.379 | 70.405 | 0.00 | 0.00 |
| ATOM | 21531 | CG1  | ILE | 1439 | 97.030 | 80.838 | 70.972 | 0.00 | 0.00 |
| ATOM | 21532 | 2HG1 | ILE | 1439 | 97.197 | 81.441 | 71.864 | 0.00 | 0.00 |
| ATOM | 21533 | 3HG1 | ILE | 1439 | 96.084 | 80.362 | 71.229 | 0.00 | 0.00 |
| ATOM | 21534 | CD1  | ILE | 1439 | 98.166 | 79.791 | 70.978 | 0.00 | 0.00 |
| ATOM | 21535 | 1HD1 | ILE | 1439 | 99.131 | 80.295 | 70.934 | 0.00 | 0.00 |
| ATOM | 21536 | 2HD1 | ILE | 1439 | 98.022 | 79.193 | 71.878 | 0.00 | 0.00 |
| ATOM | 21537 | 3HD1 | ILE | 1439 | 97.965 | 79.153 | 70.117 | 0.00 | 0.00 |
| ATOM | 21538 | C    | ILE | 1439 | 94.443 | 80.909 | 69.260 | 0.00 | 0.00 |
| ATOM | 21539 | O    | ILE | 1439 | 93.756 | 80.684 | 70.317 | 0.00 | 0.00 |
| ATOM | 21540 | N    | PRO | 1440 | 94.354 | 80.111 | 68.151 | 0.00 | 0.00 |
| ATOM | 21541 | CD   | PRO | 1440 | 95.149 | 80.318 | 66.937 | 0.00 | 0.00 |
| ATOM | 21542 | HD2  | PRO | 1440 | 95.131 | 81.391 | 66.742 | 0.00 | 0.00 |
| ATOM | 21543 | HD3  | PRO | 1440 | 96.153 | 79.905 | 67.040 | 0.00 | 0.00 |
| ATOM | 21544 | CG   | PRO | 1440 | 94.350 | 79.592 | 65.833 | 0.00 | 0.00 |
| ATOM | 21545 | HG2  | PRO | 1440 | 94.222 | 80.227 | 64.956 | 0.00 | 0.00 |
| ATOM | 21546 | HG3  | PRO | 1440 | 94.973 | 78.718 | 65.643 | 0.00 | 0.00 |
| ATOM | 21547 | CB   | PRO | 1440 | 92.988 | 79.346 | 66.389 | 0.00 | 0.00 |
| ATOM | 21548 | HB2  | PRO | 1440 | 92.479 | 80.265 | 66.098 | 0.00 | 0.00 |
| ATOM | 21549 | HB3  | PRO | 1440 | 92.448 | 78.555 | 65.868 | 0.00 | 0.00 |



ATOM 21550 CA PRO 1440 93.234 79.192 67.940 0.00 0.00  
ATOM 21551 HA PRO 1440 92.389 79.575 68.512 0.00 0.00  
ATOM 21552 C PRO 1440 93.455 77.740 68.421 0.00 0.00  
ATOM 21553 O PRO 1440 92.607 76.934 68.082 0.00 0.00  
ATOM 21554 N THR 1441 94.606 77.559 69.026 0.00 0.00  
ATOM 21555 H THR 1441 95.207 78.323 69.299 0.00 0.00  
ATOM 21556 CA THR 1441 95.209 76.231 69.081 0.00 0.00  
ATOM 21557 HA THR 1441 94.487 75.574 68.594 0.00 0.00  
ATOM 21558 CB THR 1441 96.469 76.246 68.155 0.00 0.00  
ATOM 21559 HB THR 1441 97.110 75.396 68.390 0.00 0.00  
ATOM 21560 CG2 THR 1441 96.103 75.966 66.722 0.00 0.00  
ATOM 21561 1HG2 THR 1441 97.015 75.860 66.133 0.00 0.00  
ATOM 21562 2HG2 THR 1441 95.602 74.998 66.732 0.00 0.00  
ATOM 21563 3HG2 THR 1441 95.383 76.711 66.385 0.00 0.00  
ATOM 21564 OG1 THR 1441 97.307 77.406 68.205 0.00 0.00  
TER 0 0  
ATOM 21565 HG1 THR 1441 98.004 77.176 68.825 0.00 0.00  
ATOM 21566 C THR 1441 95.530 75.530 70.474 0.00 0.00  
ATOM 21567 O THR 1441 96.012 74.354 70.502 0.00 0.00  
ATOM 21568 N PRO 1442 95.317 76.119 71.658 0.00 0.00  
ATOM 21569 CD PRO 1442 95.008 77.529 71.856 0.00 0.00  
ATOM 21570 HD2 PRO 1442 94.015 77.656 71.424 0.00 0.00  
ATOM 21571 HD3 PRO 1442 95.810 78.105 71.396 0.00 0.00  
ATOM 21572 CG PRO 1442 94.995 77.770 73.332 0.00 0.00  
ATOM 21573 HG2 PRO 1442 95.269 78.782 73.626 0.00 0.00  
ATOM 21574 HG3 PRO 1442 93.989 77.638 73.733 0.00 0.00

|      |       |      |     |      |        |        |        |      |      |
|------|-------|------|-----|------|--------|--------|--------|------|------|
| ATOM | 21575 | CB   | PRO | 1442 | 95.884 | 76.734 | 73.875 | 0.00 | 0.00 |
| ATOM | 21576 | HB2  | PRO | 1442 | 96.916 | 77.086 | 73.864 | 0.00 | 0.00 |
| ATOM | 21577 | HB3  | PRO | 1442 | 95.746 | 76.564 | 74.943 | 0.00 | 0.00 |
| ATOM | 21578 | CA   | PRO | 1442 | 95.678 | 75.548 | 72.963 | 0.00 | 0.00 |
| ATOM | 21579 | HA   | PRO | 1442 | 96.603 | 74.975 | 72.892 | 0.00 | 0.00 |
| ATOM | 21580 | C    | PRO | 1442 | 94.528 | 74.716 | 73.593 | 0.00 | 0.00 |
| ATOM | 21581 | O    | PRO | 1442 | 93.366 | 74.797 | 73.222 | 0.00 | 0.00 |
| ATOM | 21582 | N    | GLN | 1443 | 94.914 | 73.821 | 74.568 | 0.00 | 0.00 |
| ATOM | 21583 | H    | GLN | 1443 | 95.904 | 73.679 | 74.712 | 0.00 | 0.00 |
| ATOM | 21584 | CA   | GLN | 1443 | 94.059 | 72.828 | 75.206 | 0.00 | 0.00 |
| ATOM | 21585 | HA   | GLN | 1443 | 93.593 | 72.262 | 74.400 | 0.00 | 0.00 |
| ATOM | 21586 | CB   | GLN | 1443 | 94.956 | 71.786 | 75.963 | 0.00 | 0.00 |
| ATOM | 21587 | HB2  | GLN | 1443 | 95.421 | 72.190 | 76.862 | 0.00 | 0.00 |
| ATOM | 21588 | HB3  | GLN | 1443 | 94.351 | 70.942 | 76.294 | 0.00 | 0.00 |
| ATOM | 21589 | CG   | GLN | 1443 | 95.948 | 71.158 | 74.950 | 0.00 | 0.00 |
| ATOM | 21590 | HG2  | GLN | 1443 | 96.733 | 71.851 | 74.648 | 0.00 | 0.00 |
| ATOM | 21591 | HG3  | GLN | 1443 | 96.556 | 70.481 | 75.550 | 0.00 | 0.00 |
| ATOM | 21592 | CD   | GLN | 1443 | 95.273 | 70.420 | 73.807 | 0.00 | 0.00 |
| ATOM | 21593 | OE1  | GLN | 1443 | 94.285 | 69.769 | 73.918 | 0.00 | 0.00 |
| ATOM | 21594 | NE2  | GLN | 1443 | 95.713 | 70.662 | 72.597 | 0.00 | 0.00 |
| ATOM | 21595 | 1HE2 | GLN | 1443 | 95.294 | 70.009 | 71.950 | 0.00 | 0.00 |
| ATOM | 21596 | 2HE2 | GLN | 1443 | 96.602 | 71.088 | 72.380 | 0.00 | 0.00 |
| ATOM | 21597 | C    | GLN | 1443 | 92.879 | 73.452 | 76.146 | 0.00 | 0.00 |
| ATOM | 21598 | O    | GLN | 1443 | 93.185 | 74.396 | 76.813 | 0.00 | 0.00 |
| ATOM | 21599 | N    | PRO | 1444 | 91.651 | 72.973 | 76.006 | 0.00 | 0.00 |
| ATOM | 21600 | CD   | PRO | 1444 | 90.601 | 73.404 | 76.878 | 0.00 | 0.00 |

|            |          |      |        |        |        |      |      |
|------------|----------|------|--------|--------|--------|------|------|
| ATOM 21601 | HD2 PRO  | 1444 | 90.980 | 73.051 | 77.837 | 0.00 | 0.00 |
| ATOM 21602 | HD3 PRO  | 1444 | 90.373 | 74.460 | 76.733 | 0.00 | 0.00 |
| ATOM 21603 | CG PRO   | 1444 | 89.271 | 72.707 | 76.538 | 0.00 | 0.00 |
| ATOM 21604 | HG2 PRO  | 1444 | 88.857 | 72.397 | 77.498 | 0.00 | 0.00 |
| ATOM 21605 | HG3 PRO  | 1444 | 88.698 | 73.334 | 75.856 | 0.00 | 0.00 |
| ATOM 21606 | CB PRO   | 1444 | 89.810 | 71.486 | 75.738 | 0.00 | 0.00 |
| ATOM 21607 | HB2 PRO  | 1444 | 89.910 | 70.631 | 76.406 | 0.00 | 0.00 |
| ATOM 21608 | HB3 PRO  | 1444 | 89.011 | 71.223 | 75.044 | 0.00 | 0.00 |
| ATOM 21609 | CA PRO   | 1444 | 91.142 | 71.919 | 75.158 | 0.00 | 0.00 |
| ATOM 21610 | HA PRO   | 1444 | 91.795 | 71.052 | 75.258 | 0.00 | 0.00 |
| ATOM 21611 | C PRO    | 1444 | 91.063 | 72.296 | 73.700 | 0.00 | 0.00 |
| ATOM 21612 | O PRO    | 1444 | 90.392 | 73.252 | 73.296 | 0.00 | 0.00 |
| ATOM 21613 | N VAL    | 1445 | 91.597 | 71.385 | 72.873 | 0.00 | 0.00 |
| ATOM 21614 | H VAL    | 1445 | 92.080 | 70.620 | 73.323 | 0.00 | 0.00 |
| ATOM 21615 | CA VAL   | 1445 | 91.356 | 71.280 | 71.446 | 0.00 | 0.00 |
| ATOM 21616 | HA VAL   | 1445 | 91.011 | 72.272 | 71.154 | 0.00 | 0.00 |
| ATOM 21617 | CB VAL   | 1445 | 92.698 | 71.095 | 70.643 | 0.00 | 0.00 |
| ATOM 21618 | HB VAL   | 1445 | 93.153 | 70.221 | 71.108 | 0.00 | 0.00 |
| ATOM 21619 | CG1 VAL  | 1445 | 92.477 | 71.012 | 69.125 | 0.00 | 0.00 |
| ATOM 21620 | 1HG1 VAL | 1445 | 93.483 | 70.854 | 68.736 | 0.00 | 0.00 |
| ATOM 21621 | 2HG1 VAL | 1445 | 91.796 | 70.190 | 68.902 | 0.00 | 0.00 |
| ATOM 21622 | 3HG1 VAL | 1445 | 92.230 | 72.004 | 68.747 | 0.00 | 0.00 |
| ATOM 21623 | CG2 VAL  | 1445 | 93.619 | 72.267 | 70.889 | 0.00 | 0.00 |
| ATOM 21624 | 1HG2 VAL | 1445 | 93.131 | 73.221 | 70.688 | 0.00 | 0.00 |
| ATOM 21625 | 2HG2 VAL | 1445 | 93.877 | 72.186 | 71.945 | 0.00 | 0.00 |
| ATOM 21626 | 3HG2 VAL | 1445 | 94.543 | 72.171 | 70.318 | 0.00 | 0.00 |

|      |       |     |     |      |        |        |        |      |      |
|------|-------|-----|-----|------|--------|--------|--------|------|------|
| ATOM | 21627 | C   | VAL | 1445 | 90.312 | 70.121 | 71.075 | 0.00 | 0.00 |
| ATOM | 21628 | O   | VAL | 1445 | 90.563 | 68.962 | 71.215 | 0.00 | 0.00 |
| ATOM | 21629 | N   | HIE | 1446 | 89.090 | 70.575 | 70.657 | 0.00 | 0.00 |
| ATOM | 21630 | H   | HIE | 1446 | 89.018 | 71.572 | 70.802 | 0.00 | 0.00 |
| ATOM | 21631 | CA  | HIE | 1446 | 87.866 | 69.701 | 70.386 | 0.00 | 0.00 |
| ATOM | 21632 | HA  | HIE | 1446 | 88.294 | 68.772 | 70.011 | 0.00 | 0.00 |
| ATOM | 21633 | CB  | HIE | 1446 | 87.155 | 69.390 | 71.692 | 0.00 | 0.00 |
| ATOM | 21634 | HB2 | HIE | 1446 | 86.539 | 68.491 | 71.664 | 0.00 | 0.00 |
| ATOM | 21635 | HB3 | HIE | 1446 | 87.959 | 69.232 | 72.411 | 0.00 | 0.00 |
| ATOM | 21636 | CG  | HIE | 1446 | 86.321 | 70.550 | 72.214 | 0.00 | 0.00 |
| ATOM | 21637 | ND1 | HIE | 1446 | 85.206 | 71.013 | 71.506 | 0.00 | 0.00 |
| ATOM | 21638 | CE1 | HIE | 1446 | 84.642 | 71.959 | 72.263 | 0.00 | 0.00 |
| ATOM | 21639 | HE1 | HIE | 1446 | 83.607 | 72.248 | 72.154 | 0.00 | 0.00 |
| ATOM | 21640 | NE2 | HIE | 1446 | 85.354 | 72.122 | 73.372 | 0.00 | 0.00 |
| ATOM | 21641 | HE2 | HIE | 1446 | 85.122 | 72.710 | 74.160 | 0.00 | 0.00 |
| ATOM | 21642 | CD2 | HIE | 1446 | 86.419 | 71.242 | 73.407 | 0.00 | 0.00 |
| ATOM | 21643 | HD2 | HIE | 1446 | 87.063 | 71.024 | 74.247 | 0.00 | 0.00 |
| ATOM | 21644 | C   | HIE | 1446 | 86.996 | 70.187 | 69.259 | 0.00 | 0.00 |
| ATOM | 21645 | O   | HIE | 1446 | 87.129 | 71.309 | 68.682 | 0.00 | 0.00 |
| ATOM | 21646 | N   | TYR | 1447 | 86.125 | 69.337 | 68.771 | 0.00 | 0.00 |
| ATOM | 21647 | H   | TYR | 1447 | 86.027 | 68.502 | 69.333 | 0.00 | 0.00 |
| ATOM | 21648 | CA  | TYR | 1447 | 85.309 | 69.612 | 67.545 | 0.00 | 0.00 |
| ATOM | 21649 | HA  | TYR | 1447 | 86.032 | 70.107 | 66.896 | 0.00 | 0.00 |
| ATOM | 21650 | CB  | TYR | 1447 | 84.938 | 68.374 | 66.657 | 0.00 | 0.00 |
| ATOM | 21651 | HB2 | TYR | 1447 | 84.425 | 67.684 | 67.327 | 0.00 | 0.00 |
| ATOM | 21652 | HB3 | TYR | 1447 | 84.179 | 68.737 | 65.964 | 0.00 | 0.00 |

|      |       |     |     |      |        |        |        |      |      |
|------|-------|-----|-----|------|--------|--------|--------|------|------|
| ATOM | 21653 | CG  | TYR | 1447 | 85.976 | 67.660 | 65.795 | 0.00 | 0.00 |
| ATOM | 21654 | CD1 | TYR | 1447 | 86.989 | 66.917 | 66.430 | 0.00 | 0.00 |
| ATOM | 21655 | HD1 | TYR | 1447 | 86.842 | 66.764 | 67.489 | 0.00 | 0.00 |
| ATOM | 21656 | CE1 | TYR | 1447 | 87.972 | 66.268 | 65.685 | 0.00 | 0.00 |
| ATOM | 21657 | HE1 | TYR | 1447 | 88.669 | 65.568 | 66.121 | 0.00 | 0.00 |
| ATOM | 21658 | CZ  | TYR | 1447 | 88.079 | 66.476 | 64.309 | 0.00 | 0.00 |
| ATOM | 21659 | OH  | TYR | 1447 | 88.991 | 65.832 | 63.584 | 0.00 | 0.00 |
| ATOM | 21660 | HH  | TYR | 1447 | 89.151 | 66.261 | 62.740 | 0.00 | 0.00 |
| ATOM | 21661 | CE2 | TYR | 1447 | 87.076 | 67.214 | 63.680 | 0.00 | 0.00 |
| ATOM | 21662 | HE2 | TYR | 1447 | 87.050 | 67.329 | 62.606 | 0.00 | 0.00 |
| ATOM | 21663 | CD2 | TYR | 1447 | 86.046 | 67.835 | 64.421 | 0.00 | 0.00 |
| ATOM | 21664 | HD2 | TYR | 1447 | 85.228 | 68.206 | 63.822 | 0.00 | 0.00 |
| ATOM | 21665 | C   | TYR | 1447 | 84.123 | 70.452 | 67.816 | 0.00 | 0.00 |
| ATOM | 21666 | O   | TYR | 1447 | 83.115 | 69.977 | 68.338 | 0.00 | 0.00 |
| ATOM | 21667 | N   | ARG | 1448 | 84.163 | 71.718 | 67.335 | 0.00 | 0.00 |
| ATOM | 21668 | H   | ARG | 1448 | 84.958 | 71.890 | 66.736 | 0.00 | 0.00 |
| ATOM | 21669 | CA  | ARG | 1448 | 83.307 | 72.871 | 67.567 | 0.00 | 0.00 |
| ATOM | 21670 | HA  | ARG | 1448 | 82.484 | 72.485 | 68.168 | 0.00 | 0.00 |
| ATOM | 21671 | CB  | ARG | 1448 | 84.045 | 74.071 | 68.255 | 0.00 | 0.00 |
| ATOM | 21672 | HB2 | ARG | 1448 | 84.789 | 74.506 | 67.587 | 0.00 | 0.00 |
| ATOM | 21673 | HB3 | ARG | 1448 | 83.326 | 74.882 | 68.369 | 0.00 | 0.00 |
| ATOM | 21674 | CG  | ARG | 1448 | 84.788 | 73.765 | 69.520 | 0.00 | 0.00 |
| ATOM | 21675 | HG2 | ARG | 1448 | 84.080 | 73.427 | 70.277 | 0.00 | 0.00 |
| ATOM | 21676 | HG3 | ARG | 1448 | 85.440 | 72.913 | 69.330 | 0.00 | 0.00 |
| ATOM | 21677 | CD  | ARG | 1448 | 85.509 | 74.975 | 70.147 | 0.00 | 0.00 |
| ATOM | 21678 | HD2 | ARG | 1448 | 84.830 | 75.528 | 70.796 | 0.00 | 0.00 |

|      |       |      |     |      |        |        |        |      |      |
|------|-------|------|-----|------|--------|--------|--------|------|------|
| ATOM | 21679 | HD3  | ARG | 1448 | 85.840 | 75.635 | 69.345 | 0.00 | 0.00 |
| ATOM | 21680 | NE   | ARG | 1448 | 86.698 | 74.577 | 70.941 | 0.00 | 0.00 |
| ATOM | 21681 | HE   | ARG | 1448 | 87.521 | 74.228 | 70.471 | 0.00 | 0.00 |
| ATOM | 21682 | CZ   | ARG | 1448 | 86.838 | 74.776 | 72.256 | 0.00 | 0.00 |
| ATOM | 21683 | NH1  | ARG | 1448 | 87.814 | 74.298 | 72.902 | 0.00 | 0.00 |
| ATOM | 21684 | 1HH1 | ARG | 1448 | 87.793 | 74.492 | 73.893 | 0.00 | 0.00 |
| ATOM | 21685 | 2HH1 | ARG | 1448 | 88.442 | 73.737 | 72.344 | 0.00 | 0.00 |
| ATOM | 21686 | NH2  | ARG | 1448 | 85.998 | 75.403 | 73.017 | 0.00 | 0.00 |
| ATOM | 21687 | 1HH2 | ARG | 1448 | 86.073 | 75.330 | 74.022 | 0.00 | 0.00 |
| ATOM | 21688 | 2HH2 | ARG | 1448 | 85.172 | 75.729 | 72.536 | 0.00 | 0.00 |
| ATOM | 21689 | C    | ARG | 1448 | 82.636 | 73.320 | 66.268 | 0.00 | 0.00 |
| ATOM | 21690 | O    | ARG | 1448 | 83.351 | 73.358 | 65.246 | 0.00 | 0.00 |
| ATOM | 21691 | N    | PRO | 1449 | 81.313 | 73.576 | 66.197 | 0.00 | 0.00 |
| ATOM | 21692 | CD   | PRO | 1449 | 80.414 | 73.666 | 67.326 | 0.00 | 0.00 |
| ATOM | 21693 | HD2  | PRO | 1449 | 80.803 | 74.307 | 68.117 | 0.00 | 0.00 |
| ATOM | 21694 | HD3  | PRO | 1449 | 80.221 | 72.713 | 67.819 | 0.00 | 0.00 |
| ATOM | 21695 | CG   | PRO | 1449 | 79.084 | 74.257 | 66.808 | 0.00 | 0.00 |
| ATOM | 21696 | HG2  | PRO | 1449 | 78.224 | 74.007 | 67.430 | 0.00 | 0.00 |
| ATOM | 21697 | HG3  | PRO | 1449 | 79.129 | 75.341 | 66.914 | 0.00 | 0.00 |
| ATOM | 21698 | CB   | PRO | 1449 | 79.018 | 73.838 | 65.385 | 0.00 | 0.00 |
| ATOM | 21699 | HB2  | PRO | 1449 | 78.691 | 72.798 | 65.395 | 0.00 | 0.00 |
| ATOM | 21700 | HB3  | PRO | 1449 | 78.531 | 74.507 | 64.675 | 0.00 | 0.00 |
| ATOM | 21701 | CA   | PRO | 1449 | 80.495 | 73.833 | 64.969 | 0.00 | 0.00 |
| ATOM | 21702 | HA   | PRO | 1449 | 80.663 | 73.065 | 64.214 | 0.00 | 0.00 |
| ATOM | 21703 | C    | PRO | 1449 | 80.884 | 75.266 | 64.406 | 0.00 | 0.00 |
| ATOM | 21704 | O    | PRO | 1449 | 81.226 | 76.194 | 65.140 | 0.00 | 0.00 |

|      |       |     |     |      |        |        |        |      |      |
|------|-------|-----|-----|------|--------|--------|--------|------|------|
| ATOM | 21705 | N   | MET | 1450 | 80.933 | 75.397 | 63.092 | 0.00 | 0.00 |
| ATOM | 21706 | H   | MET | 1450 | 80.479 | 74.764 | 62.448 | 0.00 | 0.00 |
| ATOM | 21707 | CA  | MET | 1450 | 81.346 | 76.594 | 62.387 | 0.00 | 0.00 |
| ATOM | 21708 | HA  | MET | 1450 | 81.443 | 77.420 | 63.092 | 0.00 | 0.00 |
| ATOM | 21709 | CB  | MET | 1450 | 82.822 | 76.368 | 61.779 | 0.00 | 0.00 |
| ATOM | 21710 | HB2 | MET | 1450 | 82.800 | 75.525 | 61.088 | 0.00 | 0.00 |
| ATOM | 21711 | HB3 | MET | 1450 | 83.159 | 77.271 | 61.269 | 0.00 | 0.00 |
| ATOM | 21712 | CG  | MET | 1450 | 83.847 | 76.058 | 62.924 | 0.00 | 0.00 |
| ATOM | 21713 | HG2 | MET | 1450 | 83.452 | 75.289 | 63.588 | 0.00 | 0.00 |
| ATOM | 21714 | HG3 | MET | 1450 | 84.763 | 75.704 | 62.451 | 0.00 | 0.00 |
| ATOM | 21715 | SD  | MET | 1450 | 84.248 | 77.520 | 63.907 | 0.00 | 0.00 |
| ATOM | 21716 | CE  | MET | 1450 | 85.091 | 76.699 | 65.300 | 0.00 | 0.00 |
| ATOM | 21717 | HE1 | MET | 1450 | 85.920 | 76.100 | 64.921 | 0.00 | 0.00 |
| ATOM | 21718 | HE2 | MET | 1450 | 85.491 | 77.478 | 65.949 | 0.00 | 0.00 |
| ATOM | 21719 | HE3 | MET | 1450 | 84.450 | 76.090 | 65.938 | 0.00 | 0.00 |
| ATOM | 21720 | C   | MET | 1450 | 80.336 | 77.068 | 61.341 | 0.00 | 0.00 |
| ATOM | 21721 | O   | MET | 1450 | 79.310 | 76.383 | 61.094 | 0.00 | 0.00 |
| ATOM | 21722 | N   | PHE | 1451 | 80.509 | 78.187 | 60.701 | 0.00 | 0.00 |
| ATOM | 21723 | H   | PHE | 1451 | 81.363 | 78.717 | 60.802 | 0.00 | 0.00 |
| ATOM | 21724 | CA  | PHE | 1451 | 79.527 | 78.867 | 59.866 | 0.00 | 0.00 |
| ATOM | 21725 | HA  | PHE | 1451 | 78.741 | 79.204 | 60.542 | 0.00 | 0.00 |
| ATOM | 21726 | CB  | PHE | 1451 | 80.311 | 80.118 | 59.319 | 0.00 | 0.00 |
| ATOM | 21727 | HB2 | PHE | 1451 | 81.164 | 79.702 | 58.781 | 0.00 | 0.00 |
| ATOM | 21728 | HB3 | PHE | 1451 | 79.696 | 80.814 | 58.749 | 0.00 | 0.00 |
| ATOM | 21729 | CG  | PHE | 1451 | 80.863 | 81.018 | 60.492 | 0.00 | 0.00 |
| ATOM | 21730 | CD1 | PHE | 1451 | 82.277 | 81.138 | 60.654 | 0.00 | 0.00 |

|      |       |     |     |      |        |        |        |      |      |
|------|-------|-----|-----|------|--------|--------|--------|------|------|
| ATOM | 21731 | HD1 | PHE | 1451 | 82.940 | 80.656 | 59.950 | 0.00 | 0.00 |
| ATOM | 21732 | CE1 | PHE | 1451 | 82.838 | 81.947 | 61.668 | 0.00 | 0.00 |
| ATOM | 21733 | HE1 | PHE | 1451 | 83.911 | 81.911 | 61.784 | 0.00 | 0.00 |
| ATOM | 21734 | CZ  | PHE | 1451 | 81.946 | 82.680 | 62.396 | 0.00 | 0.00 |
| ATOM | 21735 | HZ  | PHE | 1451 | 82.295 | 83.283 | 63.221 | 0.00 | 0.00 |
| ATOM | 21736 | CE2 | PHE | 1451 | 80.544 | 82.640 | 62.241 | 0.00 | 0.00 |
| ATOM | 21737 | HE2 | PHE | 1451 | 79.898 | 83.200 | 62.901 | 0.00 | 0.00 |
| ATOM | 21738 | CD2 | PHE | 1451 | 79.974 | 81.708 | 61.320 | 0.00 | 0.00 |
| ATOM | 21739 | HD2 | PHE | 1451 | 78.913 | 81.813 | 61.146 | 0.00 | 0.00 |
| ATOM | 21740 | C   | PHE | 1451 | 78.792 | 78.114 | 58.770 | 0.00 | 0.00 |
| ATOM | 21741 | O   | PHE | 1451 | 77.612 | 78.439 | 58.481 | 0.00 | 0.00 |
| ATOM | 21742 | N   | GLY | 1452 | 79.362 | 77.089 | 58.091 | 0.00 | 0.00 |
| ATOM | 21743 | H   | GLY | 1452 | 80.312 | 76.820 | 58.301 | 0.00 | 0.00 |
| ATOM | 21744 | CA  | GLY | 1452 | 78.595 | 76.262 | 57.145 | 0.00 | 0.00 |
| ATOM | 21745 | HA2 | GLY | 1452 | 78.318 | 76.948 | 56.344 | 0.00 | 0.00 |
| ATOM | 21746 | HA3 | GLY | 1452 | 79.300 | 75.578 | 56.672 | 0.00 | 0.00 |
| ATOM | 21747 | C   | GLY | 1452 | 77.447 | 75.489 | 57.756 | 0.00 | 0.00 |
| ATOM | 21748 | O   | GLY | 1452 | 76.519 | 75.042 | 57.109 | 0.00 | 0.00 |
| ATOM | 21749 | N   | ALA | 1453 | 77.348 | 75.467 | 59.035 | 0.00 | 0.00 |
| ATOM | 21750 | H   | ALA | 1453 | 77.889 | 76.142 | 59.557 | 0.00 | 0.00 |
| ATOM | 21751 | CA  | ALA | 1453 | 76.321 | 74.807 | 59.874 | 0.00 | 0.00 |
| ATOM | 21752 | HA  | ALA | 1453 | 75.581 | 74.313 | 59.245 | 0.00 | 0.00 |
| ATOM | 21753 | CB  | ALA | 1453 | 76.930 | 73.660 | 60.726 | 0.00 | 0.00 |
| ATOM | 21754 | HB1 | ALA | 1453 | 76.389 | 73.494 | 61.657 | 0.00 | 0.00 |
| ATOM | 21755 | HB2 | ALA | 1453 | 77.070 | 72.774 | 60.106 | 0.00 | 0.00 |
| ATOM | 21756 | HB3 | ALA | 1453 | 77.912 | 73.907 | 61.128 | 0.00 | 0.00 |



|      |       |      |     |      |        |        |        |      |      |
|------|-------|------|-----|------|--------|--------|--------|------|------|
| ATOM | 21757 | C    | ALA | 1453 | 75.485 | 75.884 | 60.656 | 0.00 | 0.00 |
| ATOM | 21758 | O    | ALA | 1453 | 74.622 | 75.526 | 61.522 | 0.00 | 0.00 |
| ATOM | 21759 | N    | LEU | 1454 | 75.545 | 77.153 | 60.311 | 0.00 | 0.00 |
| ATOM | 21760 | H    | LEU | 1454 | 76.100 | 77.427 | 59.513 | 0.00 | 0.00 |
| ATOM | 21761 | CA   | LEU | 1454 | 74.798 | 78.236 | 61.045 | 0.00 | 0.00 |
| ATOM | 21762 | HA   | LEU | 1454 | 74.225 | 77.723 | 61.818 | 0.00 | 0.00 |
| ATOM | 21763 | CB   | LEU | 1454 | 75.754 | 79.237 | 61.540 | 0.00 | 0.00 |
| ATOM | 21764 | HB2  | LEU | 1454 | 76.604 | 78.757 | 62.025 | 0.00 | 0.00 |
| ATOM | 21765 | HB3  | LEU | 1454 | 76.384 | 79.654 | 60.755 | 0.00 | 0.00 |
| ATOM | 21766 | CG   | LEU | 1454 | 75.145 | 80.227 | 62.551 | 0.00 | 0.00 |
| ATOM | 21767 | HG   | LEU | 1454 | 74.351 | 80.816 | 62.092 | 0.00 | 0.00 |
| ATOM | 21768 | CD1  | LEU | 1454 | 74.491 | 79.589 | 63.783 | 0.00 | 0.00 |
| ATOM | 21769 | 1HD1 | LEU | 1454 | 74.100 | 80.367 | 64.438 | 0.00 | 0.00 |
| ATOM | 21770 | 2HD1 | LEU | 1454 | 73.609 | 78.987 | 63.562 | 0.00 | 0.00 |
| ATOM | 21771 | 3HD1 | LEU | 1454 | 75.169 | 78.923 | 64.317 | 0.00 | 0.00 |
| ATOM | 21772 | CD2  | LEU | 1454 | 76.216 | 81.074 | 63.196 | 0.00 | 0.00 |
| ATOM | 21773 | 1HD2 | LEU | 1454 | 77.081 | 80.422 | 63.313 | 0.00 | 0.00 |
| ATOM | 21774 | 2HD2 | LEU | 1454 | 76.473 | 81.856 | 62.481 | 0.00 | 0.00 |
| ATOM | 21775 | 3HD2 | LEU | 1454 | 75.868 | 81.524 | 64.126 | 0.00 | 0.00 |
| ATOM | 21776 | C    | LEU | 1454 | 73.715 | 78.963 | 60.193 | 0.00 | 0.00 |
| ATOM | 21777 | O    | LEU | 1454 | 73.950 | 79.315 | 59.036 | 0.00 | 0.00 |
| ATOM | 21778 | N    | GLY | 1455 | 72.549 | 79.234 | 60.778 | 0.00 | 0.00 |
| ATOM | 21779 | H    | GLY | 1455 | 72.397 | 78.957 | 61.737 | 0.00 | 0.00 |
| ATOM | 21780 | CA   | GLY | 1455 | 71.670 | 80.251 | 60.277 | 0.00 | 0.00 |
| ATOM | 21781 | HA2  | GLY | 1455 | 70.828 | 80.257 | 60.969 | 0.00 | 0.00 |
| ATOM | 21782 | HA3  | GLY | 1455 | 72.224 | 81.189 | 60.298 | 0.00 | 0.00 |

|      |       |     |     |      |        |        |        |      |      |
|------|-------|-----|-----|------|--------|--------|--------|------|------|
| ATOM | 21783 | C   | GLY | 1455 | 71.143 | 79.940 | 58.862 | 0.00 | 0.00 |
| ATOM | 21784 | O   | GLY | 1455 | 70.873 | 78.751 | 58.501 | 0.00 | 0.00 |
| ATOM | 21785 | N   | SER | 1456 | 70.868 | 80.981 | 58.116 | 0.00 | 0.00 |
| ATOM | 21786 | H   | SER | 1456 | 71.202 | 81.858 | 58.489 | 0.00 | 0.00 |
| ATOM | 21787 | CA  | SER | 1456 | 70.604 | 80.887 | 56.710 | 0.00 | 0.00 |
| ATOM | 21788 | HA  | SER | 1456 | 69.968 | 80.050 | 56.422 | 0.00 | 0.00 |
| ATOM | 21789 | CB  | SER | 1456 | 69.858 | 82.109 | 56.236 | 0.00 | 0.00 |
| ATOM | 21790 | HB2 | SER | 1456 | 69.580 | 82.093 | 55.183 | 0.00 | 0.00 |
| ATOM | 21791 | HB3 | SER | 1456 | 69.008 | 82.235 | 56.907 | 0.00 | 0.00 |
| ATOM | 21792 | OG  | SER | 1456 | 70.651 | 83.204 | 56.498 | 0.00 | 0.00 |
| ATOM | 21793 | HG  | SER | 1456 | 70.189 | 83.864 | 55.975 | 0.00 | 0.00 |
| ATOM | 21794 | C   | SER | 1456 | 71.841 | 80.707 | 55.785 | 0.00 | 0.00 |
| ATOM | 21795 | O   | SER | 1456 | 71.771 | 80.173 | 54.724 | 0.00 | 0.00 |
| ATOM | 21796 | N   | ALA | 1457 | 73.078 | 80.985 | 56.331 | 0.00 | 0.00 |
| ATOM | 21797 | H   | ALA | 1457 | 73.145 | 81.511 | 57.190 | 0.00 | 0.00 |
| ATOM | 21798 | CA  | ALA | 1457 | 74.327 | 80.465 | 55.767 | 0.00 | 0.00 |
| ATOM | 21799 | HA  | ALA | 1457 | 74.504 | 80.938 | 54.801 | 0.00 | 0.00 |
| ATOM | 21800 | CB  | ALA | 1457 | 75.509 | 80.908 | 56.589 | 0.00 | 0.00 |
| ATOM | 21801 | HB1 | ALA | 1457 | 75.306 | 80.539 | 57.594 | 0.00 | 0.00 |
| ATOM | 21802 | HB2 | ALA | 1457 | 76.415 | 80.357 | 56.338 | 0.00 | 0.00 |
| ATOM | 21803 | HB3 | ALA | 1457 | 75.690 | 81.960 | 56.367 | 0.00 | 0.00 |
| ATOM | 21804 | C   | ALA | 1457 | 74.349 | 78.912 | 55.504 | 0.00 | 0.00 |
| ATOM | 21805 | O   | ALA | 1457 | 74.603 | 78.497 | 54.358 | 0.00 | 0.00 |
| ATOM | 21806 | N   | ARG | 1458 | 73.945 | 78.100 | 56.526 | 0.00 | 0.00 |
| ATOM | 21807 | H   | ARG | 1458 | 73.821 | 78.576 | 57.408 | 0.00 | 0.00 |
| ATOM | 21808 | CA  | ARG | 1458 | 73.621 | 76.668 | 56.469 | 0.00 | 0.00 |

|      |       |      |     |      |        |        |        |      |      |
|------|-------|------|-----|------|--------|--------|--------|------|------|
| ATOM | 21809 | HA   | ARG | 1458 | 74.610 | 76.218 | 56.377 | 0.00 | 0.00 |
| ATOM | 21810 | CB   | ARG | 1458 | 72.920 | 76.157 | 57.714 | 0.00 | 0.00 |
| ATOM | 21811 | HB2  | ARG | 1458 | 73.586 | 76.461 | 58.522 | 0.00 | 0.00 |
| ATOM | 21812 | HB3  | ARG | 1458 | 71.987 | 76.615 | 58.041 | 0.00 | 0.00 |
| ATOM | 21813 | CG   | ARG | 1458 | 72.753 | 74.609 | 57.765 | 0.00 | 0.00 |
| ATOM | 21814 | HG2  | ARG | 1458 | 73.677 | 74.155 | 57.405 | 0.00 | 0.00 |
| ATOM | 21815 | HG3  | ARG | 1458 | 72.024 | 74.257 | 57.035 | 0.00 | 0.00 |
| ATOM | 21816 | CD   | ARG | 1458 | 72.320 | 74.006 | 59.123 | 0.00 | 0.00 |
| ATOM | 21817 | HD2  | ARG | 1458 | 71.933 | 73.006 | 58.926 | 0.00 | 0.00 |
| ATOM | 21818 | HD3  | ARG | 1458 | 73.213 | 74.022 | 59.747 | 0.00 | 0.00 |
| ATOM | 21819 | NE   | ARG | 1458 | 71.221 | 74.706 | 59.820 | 0.00 | 0.00 |
| ATOM | 21820 | HE   | ARG | 1458 | 70.464 | 74.941 | 59.195 | 0.00 | 0.00 |
| ATOM | 21821 | CZ   | ARG | 1458 | 70.909 | 75.091 | 61.059 | 0.00 | 0.00 |
| ATOM | 21822 | NH1  | ARG | 1458 | 71.767 | 75.043 | 62.125 | 0.00 | 0.00 |
| ATOM | 21823 | 1HH1 | ARG | 1458 | 71.605 | 75.543 | 62.987 | 0.00 | 0.00 |
| ATOM | 21824 | 2HH1 | ARG | 1458 | 72.715 | 74.784 | 61.890 | 0.00 | 0.00 |
| ATOM | 21825 | NH2  | ARG | 1458 | 69.681 | 75.567 | 61.228 | 0.00 | 0.00 |
| ATOM | 21826 | 1HH2 | ARG | 1458 | 69.406 | 75.703 | 62.191 | 0.00 | 0.00 |
| ATOM | 21827 | 2HH2 | ARG | 1458 | 69.043 | 75.663 | 60.451 | 0.00 | 0.00 |
| ATOM | 21828 | C    | ARG | 1458 | 72.796 | 76.405 | 55.206 | 0.00 | 0.00 |
| ATOM | 21829 | O    | ARG | 1458 | 73.254 | 75.645 | 54.384 | 0.00 | 0.00 |
| ATOM | 21830 | N    | HIE | 1459 | 71.647 | 77.043 | 54.983 | 0.00 | 0.00 |
| ATOM | 21831 | H    | HIE | 1459 | 71.334 | 77.653 | 55.725 | 0.00 | 0.00 |
| ATOM | 21832 | CA   | HIE | 1459 | 70.830 | 76.870 | 53.804 | 0.00 | 0.00 |
| ATOM | 21833 | HA   | HIE | 1459 | 70.576 | 75.816 | 53.688 | 0.00 | 0.00 |
| ATOM | 21834 | CB   | HIE | 1459 | 69.486 | 77.702 | 53.928 | 0.00 | 0.00 |

|      |       |     |     |      |        |        |        |      |      |
|------|-------|-----|-----|------|--------|--------|--------|------|------|
| ATOM | 21835 | HB2 | HIE | 1459 | 69.726 | 78.720 | 54.234 | 0.00 | 0.00 |
| ATOM | 21836 | HB3 | HIE | 1459 | 68.965 | 77.626 | 52.973 | 0.00 | 0.00 |
| ATOM | 21837 | CG  | HIE | 1459 | 68.476 | 77.174 | 54.952 | 0.00 | 0.00 |
| ATOM | 21838 | ND1 | HIE | 1459 | 67.778 | 77.901 | 55.895 | 0.00 | 0.00 |
| ATOM | 21839 | CE1 | HIE | 1459 | 66.922 | 77.023 | 56.356 | 0.00 | 0.00 |
| ATOM | 21840 | HE1 | HIE | 1459 | 66.267 | 77.157 | 57.204 | 0.00 | 0.00 |
| ATOM | 21841 | NE2 | HIE | 1459 | 67.086 | 75.841 | 55.818 | 0.00 | 0.00 |
| ATOM | 21842 | HE2 | HIE | 1459 | 66.546 | 75.007 | 56.001 | 0.00 | 0.00 |
| ATOM | 21843 | CD2 | HIE | 1459 | 67.941 | 75.935 | 54.829 | 0.00 | 0.00 |
| ATOM | 21844 | HD2 | HIE | 1459 | 68.226 | 75.135 | 54.162 | 0.00 | 0.00 |
| ATOM | 21845 | C   | HIE | 1459 | 71.497 | 77.202 | 52.428 | 0.00 | 0.00 |
| ATOM | 21846 | O   | HIE | 1459 | 71.176 | 76.574 | 51.437 | 0.00 | 0.00 |
| ATOM | 21847 | N   | HIE | 1460 | 72.558 | 78.033 | 52.476 | 0.00 | 0.00 |
| ATOM | 21848 | H   | HIE | 1460 | 72.796 | 78.473 | 53.353 | 0.00 | 0.00 |
| ATOM | 21849 | CA  | HIE | 1460 | 73.375 | 78.256 | 51.269 | 0.00 | 0.00 |
| ATOM | 21850 | HA  | HIE | 1460 | 72.738 | 78.170 | 50.390 | 0.00 | 0.00 |
| ATOM | 21851 | CB  | HIE | 1460 | 73.926 | 79.724 | 51.354 | 0.00 | 0.00 |
| ATOM | 21852 | HB2 | HIE | 1460 | 73.317 | 80.325 | 52.028 | 0.00 | 0.00 |
| ATOM | 21853 | HB3 | HIE | 1460 | 74.936 | 79.669 | 51.761 | 0.00 | 0.00 |
| ATOM | 21854 | CG  | HIE | 1460 | 73.915 | 80.553 | 50.095 | 0.00 | 0.00 |
| ATOM | 21855 | ND1 | HIE | 1460 | 72.942 | 81.365 | 49.725 | 0.00 | 0.00 |
| ATOM | 21856 | CE1 | HIE | 1460 | 73.071 | 81.521 | 48.402 | 0.00 | 0.00 |
| ATOM | 21857 | HE1 | HIE | 1460 | 72.500 | 82.204 | 47.790 | 0.00 | 0.00 |
| ATOM | 21858 | NE2 | HIE | 1460 | 74.113 | 80.918 | 47.940 | 0.00 | 0.00 |
| ATOM | 21859 | HE2 | HIE | 1460 | 74.331 | 80.868 | 46.955 | 0.00 | 0.00 |
| ATOM | 21860 | CD2 | HIE | 1460 | 74.661 | 80.260 | 48.967 | 0.00 | 0.00 |

|      |       |     |     |      |        |        |        |      |      |
|------|-------|-----|-----|------|--------|--------|--------|------|------|
| ATOM | 21861 | HD2 | HIE | 1460 | 75.309 | 79.402 | 48.867 | 0.00 | 0.00 |
| ATOM | 21862 | C   | HIE | 1460 | 74.545 | 77.229 | 51.065 | 0.00 | 0.00 |
| ATOM | 21863 | O   | HIE | 1460 | 75.089 | 77.107 | 50.008 | 0.00 | 0.00 |
| ATOM | 21864 | N   | CYS | 1461 | 74.916 | 76.460 | 52.157 | 0.00 | 0.00 |
| ATOM | 21865 | H   | CYS | 1461 | 74.391 | 76.641 | 53.000 | 0.00 | 0.00 |
| ATOM | 21866 | CA  | CYS | 1461 | 76.102 | 75.551 | 52.308 | 0.00 | 0.00 |
| ATOM | 21867 | HA  | CYS | 1461 | 76.748 | 75.799 | 51.466 | 0.00 | 0.00 |
| ATOM | 21868 | CB  | CYS | 1461 | 76.788 | 75.822 | 53.653 | 0.00 | 0.00 |
| ATOM | 21869 | HB2 | CYS | 1461 | 76.039 | 75.831 | 54.444 | 0.00 | 0.00 |
| ATOM | 21870 | HB3 | CYS | 1461 | 77.589 | 75.107 | 53.843 | 0.00 | 0.00 |
| ATOM | 21871 | SG  | CYS | 1461 | 77.578 | 77.556 | 53.477 | 0.00 | 0.00 |
| ATOM | 21872 | HG  | CYS | 1461 | 76.493 | 78.332 | 53.543 | 0.00 | 0.00 |
| ATOM | 21873 | C   | CYS | 1461 | 75.734 | 74.016 | 52.025 | 0.00 | 0.00 |
| ATOM | 21874 | O   | CYS | 1461 | 76.598 | 73.284 | 51.598 | 0.00 | 0.00 |
| ATOM | 21875 | N   | ARG | 1462 | 74.473 | 73.580 | 52.351 | 0.00 | 0.00 |
| ATOM | 21876 | H   | ARG | 1462 | 73.824 | 74.239 | 52.756 | 0.00 | 0.00 |
| ATOM | 21877 | CA  | ARG | 1462 | 74.015 | 72.239 | 52.180 | 0.00 | 0.00 |
| ATOM | 21878 | HA  | ARG | 1462 | 74.830 | 71.660 | 51.747 | 0.00 | 0.00 |
| ATOM | 21879 | CB  | ARG | 1462 | 73.842 | 71.546 | 53.483 | 0.00 | 0.00 |
| ATOM | 21880 | HB2 | ARG | 1462 | 73.610 | 70.508 | 53.245 | 0.00 | 0.00 |
| ATOM | 21881 | HB3 | ARG | 1462 | 74.825 | 71.586 | 53.953 | 0.00 | 0.00 |
| ATOM | 21882 | CG  | ARG | 1462 | 72.864 | 71.994 | 54.459 | 0.00 | 0.00 |
| ATOM | 21883 | HG2 | ARG | 1462 | 73.074 | 71.653 | 55.472 | 0.00 | 0.00 |
| ATOM | 21884 | HG3 | ARG | 1462 | 72.906 | 73.077 | 54.579 | 0.00 | 0.00 |
| ATOM | 21885 | CD  | ARG | 1462 | 71.418 | 71.751 | 53.965 | 0.00 | 0.00 |
| ATOM | 21886 | HD2 | ARG | 1462 | 70.652 | 72.183 | 54.609 | 0.00 | 0.00 |

|      |       |      |     |      |        |        |        |      |      |
|------|-------|------|-----|------|--------|--------|--------|------|------|
| ATOM | 21887 | HD3  | ARG | 1462 | 71.177 | 72.173 | 52.989 | 0.00 | 0.00 |
| ATOM | 21888 | NE   | ARG | 1462 | 71.091 | 70.333 | 54.037 | 0.00 | 0.00 |
| ATOM | 21889 | HE   | ARG | 1462 | 71.562 | 69.842 | 54.783 | 0.00 | 0.00 |
| ATOM | 21890 | CZ   | ARG | 1462 | 70.155 | 69.650 | 53.415 | 0.00 | 0.00 |
| ATOM | 21891 | NH1  | ARG | 1462 | 69.349 | 70.297 | 52.559 | 0.00 | 0.00 |
| ATOM | 21892 | 1HH1 | ARG | 1462 | 68.718 | 69.840 | 51.917 | 0.00 | 0.00 |
| ATOM | 21893 | 2HH1 | ARG | 1462 | 69.164 | 71.286 | 52.642 | 0.00 | 0.00 |
| ATOM | 21894 | NH2  | ARG | 1462 | 70.084 | 68.346 | 53.537 | 0.00 | 0.00 |
| ATOM | 21895 | 1HH2 | ARG | 1462 | 69.236 | 67.938 | 53.170 | 0.00 | 0.00 |
| ATOM | 21896 | 2HH2 | ARG | 1462 | 70.606 | 67.979 | 54.320 | 0.00 | 0.00 |
| ATOM | 21897 | C    | ARG | 1462 | 72.919 | 72.070 | 51.177 | 0.00 | 0.00 |
| ATOM | 21898 | O    | ARG | 1462 | 72.295 | 73.027 | 50.804 | 0.00 | 0.00 |
| ATOM | 21899 | N    | LEU | 1463 | 72.778 | 70.899 | 50.637 | 0.00 | 0.00 |
| ATOM | 21900 | H    | LEU | 1463 | 73.230 | 70.152 | 51.145 | 0.00 | 0.00 |
| ATOM | 21901 | CA   | LEU | 1463 | 71.975 | 70.576 | 49.473 | 0.00 | 0.00 |
| ATOM | 21902 | HA   | LEU | 1463 | 71.439 | 71.465 | 49.141 | 0.00 | 0.00 |
| ATOM | 21903 | CB   | LEU | 1463 | 73.079 | 70.307 | 48.384 | 0.00 | 0.00 |
| ATOM | 21904 | HB2  | LEU | 1463 | 73.886 | 71.035 | 48.463 | 0.00 | 0.00 |
| ATOM | 21905 | HB3  | LEU | 1463 | 73.598 | 69.361 | 48.543 | 0.00 | 0.00 |
| ATOM | 21906 | CG   | LEU | 1463 | 72.580 | 70.486 | 46.880 | 0.00 | 0.00 |
| ATOM | 21907 | HG   | LEU | 1463 | 72.143 | 71.484 | 46.872 | 0.00 | 0.00 |
| ATOM | 21908 | CD1  | LEU | 1463 | 73.838 | 70.702 | 46.012 | 0.00 | 0.00 |
| ATOM | 21909 | 1HD1 | LEU | 1463 | 74.439 | 69.793 | 46.042 | 0.00 | 0.00 |
| ATOM | 21910 | 2HD1 | LEU | 1463 | 73.638 | 70.644 | 44.942 | 0.00 | 0.00 |
| ATOM | 21911 | 3HD1 | LEU | 1463 | 74.271 | 71.676 | 46.240 | 0.00 | 0.00 |
| ATOM | 21912 | CD2  | LEU | 1463 | 71.725 | 69.460 | 46.171 | 0.00 | 0.00 |

|      |       |      |     |      |        |        |        |      |      |
|------|-------|------|-----|------|--------|--------|--------|------|------|
| ATOM | 21913 | 1HD2 | LEU | 1463 | 70.731 | 69.410 | 46.617 | 0.00 | 0.00 |
| ATOM | 21914 | 2HD2 | LEU | 1463 | 71.571 | 69.834 | 45.159 | 0.00 | 0.00 |
| ATOM | 21915 | 3HD2 | LEU | 1463 | 72.219 | 68.489 | 46.153 | 0.00 | 0.00 |
| ATOM | 21916 | C    | LEU | 1463 | 70.976 | 69.441 | 49.781 | 0.00 | 0.00 |
| ATOM | 21917 | O    | LEU | 1463 | 71.390 | 68.383 | 50.276 | 0.00 | 0.00 |
| ATOM | 21918 | N    | THR | 1464 | 69.698 | 69.572 | 49.271 | 0.00 | 0.00 |
| ATOM | 21919 | H    | THR | 1464 | 69.445 | 70.429 | 48.800 | 0.00 | 0.00 |
| ATOM | 21920 | CA   | THR | 1464 | 68.717 | 68.491 | 49.249 | 0.00 | 0.00 |
| ATOM | 21921 | HA   | THR | 1464 | 68.971 | 67.793 | 50.047 | 0.00 | 0.00 |
| ATOM | 21922 | CB   | THR | 1464 | 67.343 | 69.150 | 49.570 | 0.00 | 0.00 |
| ATOM | 21923 | HB   | THR | 1464 | 67.129 | 70.016 | 48.945 | 0.00 | 0.00 |
| ATOM | 21924 | CG2  | THR | 1464 | 66.146 | 68.223 | 49.456 | 0.00 | 0.00 |
| ATOM | 21925 | 1HG2 | THR | 1464 | 66.380 | 67.248 | 49.883 | 0.00 | 0.00 |
| ATOM | 21926 | 2HG2 | THR | 1464 | 65.189 | 68.565 | 49.849 | 0.00 | 0.00 |
| ATOM | 21927 | 3HG2 | THR | 1464 | 65.908 | 68.065 | 48.405 | 0.00 | 0.00 |
| ATOM | 21928 | OG1  | THR | 1464 | 67.326 | 69.565 | 50.853 | 0.00 | 0.00 |
| ATOM | 21929 | HG1  | THR | 1464 | 66.514 | 70.067 | 50.951 | 0.00 | 0.00 |
| ATOM | 21930 | C    | THR | 1464 | 68.468 | 67.838 | 47.876 | 0.00 | 0.00 |
| ATOM | 21931 | O    | THR | 1464 | 68.133 | 68.518 | 46.950 | 0.00 | 0.00 |
| ATOM | 21932 | N    | PHE | 1465 | 68.759 | 66.534 | 47.803 | 0.00 | 0.00 |
| ATOM | 21933 | H    | PHE | 1465 | 69.110 | 66.048 | 48.616 | 0.00 | 0.00 |
| ATOM | 21934 | CA   | PHE | 1465 | 68.465 | 65.749 | 46.548 | 0.00 | 0.00 |
| ATOM | 21935 | HA   | PHE | 1465 | 68.730 | 66.367 | 45.691 | 0.00 | 0.00 |
| ATOM | 21936 | CB   | PHE | 1465 | 69.315 | 64.491 | 46.543 | 0.00 | 0.00 |
| ATOM | 21937 | HB2  | PHE | 1465 | 69.125 | 63.844 | 47.399 | 0.00 | 0.00 |
| ATOM | 21938 | HB3  | PHE | 1465 | 69.071 | 63.980 | 45.612 | 0.00 | 0.00 |

|      |       |      |     |      |        |        |        |      |      |
|------|-------|------|-----|------|--------|--------|--------|------|------|
| ATOM | 21939 | CG   | PHE | 1465 | 70.844 | 64.769 | 46.392 | 0.00 | 0.00 |
| ATOM | 21940 | CD1  | PHE | 1465 | 71.696 | 64.745 | 47.517 | 0.00 | 0.00 |
| ATOM | 21941 | HD1  | PHE | 1465 | 71.272 | 64.640 | 48.505 | 0.00 | 0.00 |
| ATOM | 21942 | CE1  | PHE | 1465 | 73.031 | 65.002 | 47.328 | 0.00 | 0.00 |
| ATOM | 21943 | HE1  | PHE | 1465 | 73.677 | 64.963 | 48.192 | 0.00 | 0.00 |
| ATOM | 21944 | CZ   | PHE | 1465 | 73.545 | 65.484 | 46.109 | 0.00 | 0.00 |
| ATOM | 21945 | HZ   | PHE | 1465 | 74.581 | 65.785 | 46.053 | 0.00 | 0.00 |
| ATOM | 21946 | CE2  | PHE | 1465 | 72.681 | 65.612 | 44.974 | 0.00 | 0.00 |
| ATOM | 21947 | HE2  | PHE | 1465 | 73.098 | 65.897 | 44.020 | 0.00 | 0.00 |
| ATOM | 21948 | CD2  | PHE | 1465 | 71.333 | 65.195 | 45.150 | 0.00 | 0.00 |
| ATOM | 21949 | HD2  | PHE | 1465 | 70.687 | 65.067 | 44.294 | 0.00 | 0.00 |
| ATOM | 21950 | C    | PHE | 1465 | 67.001 | 65.348 | 46.450 | 0.00 | 0.00 |
| ATOM | 21951 | O    | PHE | 1465 | 66.407 | 64.824 | 47.385 | 0.00 | 0.00 |
| ATOM | 21952 | N    | LEU | 1466 | 66.430 | 65.483 | 45.276 | 0.00 | 0.00 |
| ATOM | 21953 | H    | LEU | 1466 | 66.962 | 65.956 | 44.560 | 0.00 | 0.00 |
| ATOM | 21954 | CA   | LEU | 1466 | 65.086 | 65.167 | 44.967 | 0.00 | 0.00 |
| ATOM | 21955 | HA   | LEU | 1466 | 64.696 | 64.520 | 45.753 | 0.00 | 0.00 |
| ATOM | 21956 | CB   | LEU | 1466 | 64.318 | 66.525 | 44.897 | 0.00 | 0.00 |
| ATOM | 21957 | HB2  | LEU | 1466 | 64.761 | 67.188 | 44.155 | 0.00 | 0.00 |
| ATOM | 21958 | HB3  | LEU | 1466 | 63.333 | 66.221 | 44.544 | 0.00 | 0.00 |
| ATOM | 21959 | CG   | LEU | 1466 | 64.031 | 67.253 | 46.199 | 0.00 | 0.00 |
| ATOM | 21960 | HG   | LEU | 1466 | 64.988 | 67.445 | 46.683 | 0.00 | 0.00 |
| ATOM | 21961 | CD1  | LEU | 1466 | 63.506 | 68.702 | 45.931 | 0.00 | 0.00 |
| ATOM | 21962 | 1HD1 | LEU | 1466 | 63.350 | 69.192 | 46.892 | 0.00 | 0.00 |
| ATOM | 21963 | 2HD1 | LEU | 1466 | 64.086 | 69.321 | 45.247 | 0.00 | 0.00 |
| ATOM | 21964 | 3HD1 | LEU | 1466 | 62.513 | 68.640 | 45.485 | 0.00 | 0.00 |



|      |       |      |     |      |        |        |        |      |      |
|------|-------|------|-----|------|--------|--------|--------|------|------|
| ATOM | 21965 | CD2  | LEU | 1466 | 63.055 | 66.534 | 47.139 | 0.00 | 0.00 |
| ATOM | 21966 | 1HD2 | LEU | 1466 | 63.494 | 65.570 | 47.396 | 0.00 | 0.00 |
| ATOM | 21967 | 2HD2 | LEU | 1466 | 62.965 | 67.083 | 48.076 | 0.00 | 0.00 |
| ATOM | 21968 | 3HD2 | LEU | 1466 | 62.063 | 66.445 | 46.696 | 0.00 | 0.00 |
| ATOM | 21969 | C    | LEU | 1466 | 64.987 | 64.380 | 43.715 | 0.00 | 0.00 |
| ATOM | 21970 | O    | LEU | 1466 | 65.848 | 64.342 | 42.869 | 0.00 | 0.00 |
| ATOM | 21971 | N    | SER | 1467 | 63.755 | 63.836 | 43.501 | 0.00 | 0.00 |
| ATOM | 21972 | H    | SER | 1467 | 63.084 | 63.807 | 44.256 | 0.00 | 0.00 |
| ATOM | 21973 | CA   | SER | 1467 | 63.296 | 63.215 | 42.252 | 0.00 | 0.00 |
| ATOM | 21974 | HA   | SER | 1467 | 64.170 | 62.858 | 41.706 | 0.00 | 0.00 |
| ATOM | 21975 | CB   | SER | 1467 | 62.414 | 62.001 | 42.560 | 0.00 | 0.00 |
| ATOM | 21976 | HB2  | SER | 1467 | 62.363 | 61.348 | 41.689 | 0.00 | 0.00 |
| ATOM | 21977 | HB3  | SER | 1467 | 62.926 | 61.372 | 43.288 | 0.00 | 0.00 |
| ATOM | 21978 | OG   | SER | 1467 | 61.179 | 62.518 | 43.074 | 0.00 | 0.00 |
| ATOM | 21979 | HG   | SER | 1467 | 61.148 | 62.375 | 44.023 | 0.00 | 0.00 |
| ATOM | 21980 | C    | SER | 1467 | 62.520 | 64.319 | 41.385 | 0.00 | 0.00 |
| ATOM | 21981 | O    | SER | 1467 | 62.140 | 65.379 | 41.866 | 0.00 | 0.00 |
| ATOM | 21982 | N    | GLN | 1468 | 62.235 | 63.928 | 40.140 | 0.00 | 0.00 |
| ATOM | 21983 | H    | GLN | 1468 | 62.634 | 63.062 | 39.808 | 0.00 | 0.00 |
| ATOM | 21984 | CA   | GLN | 1468 | 61.595 | 64.864 | 39.225 | 0.00 | 0.00 |
| ATOM | 21985 | HA   | GLN | 1468 | 62.100 | 65.828 | 39.295 | 0.00 | 0.00 |
| ATOM | 21986 | CB   | GLN | 1468 | 61.891 | 64.380 | 37.763 | 0.00 | 0.00 |
| ATOM | 21987 | HB2  | GLN | 1468 | 62.978 | 64.305 | 37.727 | 0.00 | 0.00 |
| ATOM | 21988 | HB3  | GLN | 1468 | 61.450 | 63.388 | 37.663 | 0.00 | 0.00 |
| ATOM | 21989 | CG   | GLN | 1468 | 61.399 | 65.252 | 36.609 | 0.00 | 0.00 |
| ATOM | 21990 | HG2  | GLN | 1468 | 60.327 | 65.119 | 36.466 | 0.00 | 0.00 |

|            |      |     |      |        |        |        |      |      |
|------------|------|-----|------|--------|--------|--------|------|------|
| ATOM 21991 | HG3  | GLN | 1468 | 61.612 | 66.302 | 36.809 | 0.00 | 0.00 |
| ATOM 21992 | CD   | GLN | 1468 | 62.052 | 65.034 | 35.265 | 0.00 | 0.00 |
| ATOM 21993 | OE1  | GLN | 1468 | 62.914 | 64.190 | 35.099 | 0.00 | 0.00 |
| ATOM 21994 | NE2  | GLN | 1468 | 61.592 | 65.594 | 34.193 | 0.00 | 0.00 |
| ATOM 21995 | 1HE2 | GLN | 1468 | 62.112 | 65.335 | 33.366 | 0.00 | 0.00 |
| ATOM 21996 | 2HE2 | GLN | 1468 | 60.894 | 66.318 | 34.285 | 0.00 | 0.00 |
| ATOM 21997 | C    | GLN | 1468 | 60.118 | 65.112 | 39.369 | 0.00 | 0.00 |
| ATOM 21998 | O    | GLN | 1468 | 59.621 | 66.216 | 39.154 | 0.00 | 0.00 |
| ATOM 21999 | N    | ALA | 1469 | 59.508 | 64.076 | 39.937 | 0.00 | 0.00 |
| ATOM 22000 | H    | ALA | 1469 | 60.045 | 63.225 | 40.030 | 0.00 | 0.00 |
| ATOM 22001 | CA   | ALA | 1469 | 58.138 | 64.090 | 40.344 | 0.00 | 0.00 |
| ATOM 22002 | HA   | ALA | 1469 | 57.428 | 64.318 | 39.549 | 0.00 | 0.00 |
| ATOM 22003 | CB   | ALA | 1469 | 57.745 | 62.680 | 40.719 | 0.00 | 0.00 |
| ATOM 22004 | HB1  | ALA | 1469 | 57.838 | 62.033 | 39.847 | 0.00 | 0.00 |
| ATOM 22005 | HB2  | ALA | 1469 | 58.383 | 62.304 | 41.519 | 0.00 | 0.00 |
| ATOM 22006 | HB3  | ALA | 1469 | 56.701 | 62.706 | 41.031 | 0.00 | 0.00 |
| ATOM 22007 | C    | ALA | 1469 | 57.921 | 65.002 | 41.560 | 0.00 | 0.00 |
| ATOM 22008 | O    | ALA | 1469 | 56.974 | 65.769 | 41.658 | 0.00 | 0.00 |
| ATOM 22009 | N    | ALA | 1470 | 58.828 | 64.865 | 42.523 | 0.00 | 0.00 |
| ATOM 22010 | H    | ALA | 1470 | 59.597 | 64.223 | 42.395 | 0.00 | 0.00 |
| ATOM 22011 | CA   | ALA | 1470 | 58.975 | 65.779 | 43.712 | 0.00 | 0.00 |
| ATOM 22012 | HA   | ALA | 1470 | 58.105 | 65.721 | 44.366 | 0.00 | 0.00 |
| ATOM 22013 | CB   | ALA | 1470 | 60.167 | 65.227 | 44.567 | 0.00 | 0.00 |
| ATOM 22014 | HB1  | ALA | 1470 | 61.026 | 65.296 | 43.901 | 0.00 | 0.00 |
| ATOM 22015 | HB2  | ALA | 1470 | 60.303 | 65.720 | 45.530 | 0.00 | 0.00 |
| ATOM 22016 | HB3  | ALA | 1470 | 59.971 | 64.189 | 44.837 | 0.00 | 0.00 |

|      |       |     |     |      |        |        |        |      |      |
|------|-------|-----|-----|------|--------|--------|--------|------|------|
| ATOM | 22017 | C   | ALA | 1470 | 59.195 | 67.237 | 43.427 | 0.00 | 0.00 |
| ATOM | 22018 | O   | ALA | 1470 | 58.745 | 68.089 | 44.206 | 0.00 | 0.00 |
| ATOM | 22019 | N   | ALA | 1471 | 59.918 | 67.501 | 42.318 | 0.00 | 0.00 |
| ATOM | 22020 | H   | ALA | 1471 | 60.340 | 66.706 | 41.860 | 0.00 | 0.00 |
| ATOM | 22021 | CA  | ALA | 1471 | 60.300 | 68.789 | 41.907 | 0.00 | 0.00 |
| ATOM | 22022 | HA  | ALA | 1471 | 60.602 | 69.339 | 42.798 | 0.00 | 0.00 |
| ATOM | 22023 | CB  | ALA | 1471 | 61.576 | 68.582 | 41.122 | 0.00 | 0.00 |
| ATOM | 22024 | HB1 | ALA | 1471 | 61.407 | 68.013 | 40.207 | 0.00 | 0.00 |
| ATOM | 22025 | HB2 | ALA | 1471 | 62.006 | 69.572 | 40.973 | 0.00 | 0.00 |
| ATOM | 22026 | HB3 | ALA | 1471 | 62.318 | 68.064 | 41.730 | 0.00 | 0.00 |
| ATOM | 22027 | C   | ALA | 1471 | 59.187 | 69.521 | 41.188 | 0.00 | 0.00 |
| ATOM | 22028 | O   | ALA | 1471 | 59.191 | 70.762 | 41.089 | 0.00 | 0.00 |
| ATOM | 22029 | N   | ALA | 1472 | 58.359 | 68.667 | 40.508 | 0.00 | 0.00 |
| ATOM | 22030 | H   | ALA | 1472 | 58.527 | 67.675 | 40.585 | 0.00 | 0.00 |
| ATOM | 22031 | CA  | ALA | 1472 | 57.161 | 69.121 | 39.787 | 0.00 | 0.00 |
| ATOM | 22032 | HA  | ALA | 1472 | 57.188 | 70.010 | 39.156 | 0.00 | 0.00 |
| ATOM | 22033 | CB  | ALA | 1472 | 56.661 | 67.939 | 38.915 | 0.00 | 0.00 |
| ATOM | 22034 | HB1 | ALA | 1472 | 57.430 | 67.437 | 38.329 | 0.00 | 0.00 |
| ATOM | 22035 | HB2 | ALA | 1472 | 56.176 | 67.100 | 39.414 | 0.00 | 0.00 |
| ATOM | 22036 | HB3 | ALA | 1472 | 55.832 | 68.194 | 38.254 | 0.00 | 0.00 |
| ATOM | 22037 | C   | ALA | 1472 | 56.010 | 69.380 | 40.725 | 0.00 | 0.00 |
| ATOM | 22038 | O   | ALA | 1472 | 55.205 | 70.289 | 40.641 | 0.00 | 0.00 |
| ATOM | 22039 | N   | ASN | 1473 | 55.862 | 68.575 | 41.754 | 0.00 | 0.00 |
| ATOM | 22040 | H   | ASN | 1473 | 56.442 | 67.751 | 41.686 | 0.00 | 0.00 |
| ATOM | 22041 | CA  | ASN | 1473 | 54.997 | 68.697 | 42.910 | 0.00 | 0.00 |
| ATOM | 22042 | HA  | ASN | 1473 | 53.987 | 68.668 | 42.502 | 0.00 | 0.00 |

|      |       |      |     |      |        |        |        |      |      |
|------|-------|------|-----|------|--------|--------|--------|------|------|
| ATOM | 22043 | CB   | ASN | 1473 | 55.098 | 67.430 | 43.739 | 0.00 | 0.00 |
| ATOM | 22044 | HB2  | ASN | 1473 | 54.994 | 66.564 | 43.086 | 0.00 | 0.00 |
| ATOM | 22045 | HB3  | ASN | 1473 | 56.070 | 67.292 | 44.213 | 0.00 | 0.00 |
| ATOM | 22046 | CG   | ASN | 1473 | 53.954 | 67.377 | 44.784 | 0.00 | 0.00 |
| ATOM | 22047 | OD1  | ASN | 1473 | 52.958 | 68.071 | 44.678 | 0.00 | 0.00 |
| ATOM | 22048 | ND2  | ASN | 1473 | 54.085 | 66.605 | 45.838 | 0.00 | 0.00 |
| ATOM | 22049 | 1HD2 | ASN | 1473 | 53.316 | 66.568 | 46.491 | 0.00 | 0.00 |
| ATOM | 22050 | 2HD2 | ASN | 1473 | 54.840 | 65.934 | 45.822 | 0.00 | 0.00 |
| ATOM | 22051 | C    | ASN | 1473 | 55.280 | 69.936 | 43.703 | 0.00 | 0.00 |
| ATOM | 22052 | O    | ASN | 1473 | 54.433 | 70.749 | 43.997 | 0.00 | 0.00 |
| ATOM | 22053 | N    | GLY | 1474 | 56.553 | 70.223 | 44.080 | 0.00 | 0.00 |
| ATOM | 22054 | H    | GLY | 1474 | 57.273 | 69.523 | 43.971 | 0.00 | 0.00 |
| ATOM | 22055 | CA   | GLY | 1474 | 56.895 | 71.457 | 44.805 | 0.00 | 0.00 |
| ATOM | 22056 | HA2  | GLY | 1474 | 57.821 | 71.843 | 44.378 | 0.00 | 0.00 |
| ATOM | 22057 | HA3  | GLY | 1474 | 56.069 | 72.161 | 44.706 | 0.00 | 0.00 |
| ATOM | 22058 | C    | GLY | 1474 | 56.986 | 71.133 | 46.320 | 0.00 | 0.00 |
| ATOM | 22059 | O    | GLY | 1474 | 56.762 | 72.010 | 47.123 | 0.00 | 0.00 |
| ATOM | 22060 | N    | VAL | 1475 | 57.457 | 69.894 | 46.700 | 0.00 | 0.00 |
| ATOM | 22061 | H    | VAL | 1475 | 57.673 | 69.205 | 45.994 | 0.00 | 0.00 |
| ATOM | 22062 | CA   | VAL | 1475 | 57.578 | 69.518 | 48.149 | 0.00 | 0.00 |
| ATOM | 22063 | HA   | VAL | 1475 | 56.623 | 69.462 | 48.672 | 0.00 | 0.00 |
| ATOM | 22064 | CB   | VAL | 1475 | 58.169 | 68.097 | 48.225 | 0.00 | 0.00 |
| ATOM | 22065 | HB   | VAL | 1475 | 58.132 | 67.833 | 49.282 | 0.00 | 0.00 |
| ATOM | 22066 | CG1  | VAL | 1475 | 57.252 | 67.046 | 47.505 | 0.00 | 0.00 |
| ATOM | 22067 | 1HG1 | VAL | 1475 | 57.593 | 66.076 | 47.868 | 0.00 | 0.00 |
| ATOM | 22068 | 2HG1 | VAL | 1475 | 56.219 | 67.164 | 47.832 | 0.00 | 0.00 |

|      |       |      |     |      |        |        |        |      |      |
|------|-------|------|-----|------|--------|--------|--------|------|------|
| ATOM | 22069 | 3HG1 | VAL | 1475 | 57.407 | 67.044 | 46.427 | 0.00 | 0.00 |
| ATOM | 22070 | CG2  | VAL | 1475 | 59.578 | 67.913 | 47.728 | 0.00 | 0.00 |
| ATOM | 22071 | 1HG2 | VAL | 1475 | 59.911 | 66.880 | 47.818 | 0.00 | 0.00 |
| ATOM | 22072 | 2HG2 | VAL | 1475 | 59.818 | 68.224 | 46.711 | 0.00 | 0.00 |
| ATOM | 22073 | 3HG2 | VAL | 1475 | 60.267 | 68.425 | 48.401 | 0.00 | 0.00 |
| ATOM | 22074 | C    | VAL | 1475 | 58.437 | 70.539 | 48.958 | 0.00 | 0.00 |
| ATOM | 22075 | O    | VAL | 1475 | 58.078 | 70.828 | 50.075 | 0.00 | 0.00 |
| ATOM | 22076 | N    | ALA | 1476 | 59.480 | 71.215 | 48.343 | 0.00 | 0.00 |
| ATOM | 22077 | H    | ALA | 1476 | 59.687 | 71.002 | 47.377 | 0.00 | 0.00 |
| ATOM | 22078 | CA   | ALA | 1476 | 60.253 | 72.253 | 48.980 | 0.00 | 0.00 |
| ATOM | 22079 | HA   | ALA | 1476 | 60.463 | 71.904 | 49.991 | 0.00 | 0.00 |
| ATOM | 22080 | CB   | ALA | 1476 | 61.706 | 72.486 | 48.304 | 0.00 | 0.00 |
| ATOM | 22081 | HB1  | ALA | 1476 | 61.472 | 72.809 | 47.289 | 0.00 | 0.00 |
| ATOM | 22082 | HB2  | ALA | 1476 | 62.137 | 73.341 | 48.826 | 0.00 | 0.00 |
| ATOM | 22083 | HB3  | ALA | 1476 | 62.331 | 71.597 | 48.388 | 0.00 | 0.00 |
| ATOM | 22084 | C    | ALA | 1476 | 59.485 | 73.618 | 49.128 | 0.00 | 0.00 |
| ATOM | 22085 | O    | ALA | 1476 | 59.675 | 74.249 | 50.149 | 0.00 | 0.00 |
| ATOM | 22086 | N    | GLU | 1477 | 58.518 | 73.888 | 48.282 | 0.00 | 0.00 |
| ATOM | 22087 | H    | GLU | 1477 | 58.407 | 73.190 | 47.561 | 0.00 | 0.00 |
| ATOM | 22088 | CA   | GLU | 1477 | 57.424 | 74.906 | 48.403 | 0.00 | 0.00 |
| ATOM | 22089 | HA   | GLU | 1477 | 57.918 | 75.779 | 48.830 | 0.00 | 0.00 |
| ATOM | 22090 | CB   | GLU | 1477 | 56.780 | 75.352 | 47.070 | 0.00 | 0.00 |
| ATOM | 22091 | HB2  | GLU | 1477 | 56.106 | 74.559 | 46.745 | 0.00 | 0.00 |
| ATOM | 22092 | HB3  | GLU | 1477 | 56.134 | 76.230 | 47.108 | 0.00 | 0.00 |
| ATOM | 22093 | CG   | GLU | 1477 | 57.700 | 75.552 | 45.822 | 0.00 | 0.00 |
| ATOM | 22094 | HG2  | GLU | 1477 | 58.072 | 74.544 | 45.639 | 0.00 | 0.00 |

|      |       |      |     |      |        |        |        |      |      |
|------|-------|------|-----|------|--------|--------|--------|------|------|
| ATOM | 22095 | HG3  | GLU | 1477 | 57.058 | 75.997 | 45.062 | 0.00 | 0.00 |
| ATOM | 22096 | CD   | GLU | 1477 | 58.908 | 76.474 | 46.160 | 0.00 | 0.00 |
| ATOM | 22097 | OE1  | GLU | 1477 | 60.099 | 76.032 | 46.302 | 0.00 | 0.00 |
| ATOM | 22098 | OE2  | GLU | 1477 | 58.653 | 77.660 | 46.297 | 0.00 | 0.00 |
| ATOM | 22099 | C    | GLU | 1477 | 56.271 | 74.536 | 49.339 | 0.00 | 0.00 |
| ATOM | 22100 | O    | GLU | 1477 | 55.962 | 75.314 | 50.251 | 0.00 | 0.00 |
| ATOM | 22101 | N    | ARG | 1478 | 55.677 | 73.349 | 49.228 | 0.00 | 0.00 |
| ATOM | 22102 | H    | ARG | 1478 | 55.961 | 72.767 | 48.453 | 0.00 | 0.00 |
| ATOM | 22103 | CA   | ARG | 1478 | 54.651 | 72.792 | 50.139 | 0.00 | 0.00 |
| ATOM | 22104 | HA   | ARG | 1478 | 53.708 | 73.337 | 50.130 | 0.00 | 0.00 |
| ATOM | 22105 | CB   | ARG | 1478 | 54.278 | 71.352 | 49.688 | 0.00 | 0.00 |
| ATOM | 22106 | HB2  | ARG | 1478 | 55.128 | 70.676 | 49.594 | 0.00 | 0.00 |
| ATOM | 22107 | HB3  | ARG | 1478 | 53.625 | 71.032 | 50.499 | 0.00 | 0.00 |
| ATOM | 22108 | CG   | ARG | 1478 | 53.544 | 71.423 | 48.287 | 0.00 | 0.00 |
| ATOM | 22109 | HG2  | ARG | 1478 | 52.724 | 72.141 | 48.315 | 0.00 | 0.00 |
| ATOM | 22110 | HG3  | ARG | 1478 | 54.210 | 71.772 | 47.498 | 0.00 | 0.00 |
| ATOM | 22111 | CD   | ARG | 1478 | 53.054 | 70.101 | 47.730 | 0.00 | 0.00 |
| ATOM | 22112 | HD2  | ARG | 1478 | 53.969 | 69.520 | 47.616 | 0.00 | 0.00 |
| ATOM | 22113 | HD3  | ARG | 1478 | 52.384 | 69.621 | 48.444 | 0.00 | 0.00 |
| ATOM | 22114 | NE   | ARG | 1478 | 52.249 | 70.383 | 46.506 | 0.00 | 0.00 |
| ATOM | 22115 | HE   | ARG | 1478 | 52.628 | 70.154 | 45.599 | 0.00 | 0.00 |
| ATOM | 22116 | CZ   | ARG | 1478 | 50.963 | 70.827 | 46.469 | 0.00 | 0.00 |
| ATOM | 22117 | NH1  | ARG | 1478 | 50.275 | 70.932 | 45.383 | 0.00 | 0.00 |
| ATOM | 22118 | 1HH1 | ARG | 1478 | 49.299 | 71.084 | 45.594 | 0.00 | 0.00 |
| ATOM | 22119 | 2HH1 | ARG | 1478 | 50.672 | 70.663 | 44.495 | 0.00 | 0.00 |
| ATOM | 22120 | NH2  | ARG | 1478 | 50.316 | 71.345 | 47.528 | 0.00 | 0.00 |

|      |       |      |     |      |        |        |        |      |      |
|------|-------|------|-----|------|--------|--------|--------|------|------|
| ATOM | 22121 | 1HH2 | ARG | 1478 | 49.337 | 71.594 | 47.546 | 0.00 | 0.00 |
| ATOM | 22122 | 2HH2 | ARG | 1478 | 50.788 | 71.385 | 48.419 | 0.00 | 0.00 |
| ATOM | 22123 | C    | ARG | 1478 | 55.054 | 72.812 | 51.558 | 0.00 | 0.00 |
| ATOM | 22124 | O    | ARG | 1478 | 54.336 | 73.435 | 52.392 | 0.00 | 0.00 |
| ATOM | 22125 | N    | LEU | 1479 | 56.198 | 72.220 | 51.891 | 0.00 | 0.00 |
| ATOM | 22126 | H    | LEU | 1479 | 56.850 | 72.044 | 51.140 | 0.00 | 0.00 |
| ATOM | 22127 | CA   | LEU | 1479 | 56.726 | 72.163 | 53.307 | 0.00 | 0.00 |
| ATOM | 22128 | HA   | LEU | 1479 | 55.868 | 72.038 | 53.967 | 0.00 | 0.00 |
| ATOM | 22129 | CB   | LEU | 1479 | 57.597 | 70.850 | 53.426 | 0.00 | 0.00 |
| ATOM | 22130 | HB2  | LEU | 1479 | 58.523 | 71.070 | 52.896 | 0.00 | 0.00 |
| ATOM | 22131 | HB3  | LEU | 1479 | 57.822 | 70.674 | 54.478 | 0.00 | 0.00 |
| ATOM | 22132 | CG   | LEU | 1479 | 57.084 | 69.518 | 52.891 | 0.00 | 0.00 |
| ATOM | 22133 | HG   | LEU | 1479 | 56.802 | 69.518 | 51.839 | 0.00 | 0.00 |
| ATOM | 22134 | CD1  | LEU | 1479 | 58.105 | 68.402 | 52.988 | 0.00 | 0.00 |
| ATOM | 22135 | 1HD1 | LEU | 1479 | 57.742 | 67.440 | 52.628 | 0.00 | 0.00 |
| ATOM | 22136 | 2HD1 | LEU | 1479 | 58.893 | 68.671 | 52.285 | 0.00 | 0.00 |
| ATOM | 22137 | 3HD1 | LEU | 1479 | 58.372 | 68.409 | 54.045 | 0.00 | 0.00 |
| ATOM | 22138 | CD2  | LEU | 1479 | 55.821 | 69.069 | 53.655 | 0.00 | 0.00 |
| ATOM | 22139 | 1HD2 | LEU | 1479 | 55.965 | 68.967 | 54.730 | 0.00 | 0.00 |
| ATOM | 22140 | 2HD2 | LEU | 1479 | 54.990 | 69.716 | 53.373 | 0.00 | 0.00 |
| ATOM | 22141 | 3HD2 | LEU | 1479 | 55.667 | 68.025 | 53.379 | 0.00 | 0.00 |
| ATOM | 22142 | C    | LEU | 1479 | 57.494 | 73.390 | 53.773 | 0.00 | 0.00 |
| ATOM | 22143 | O    | LEU | 1479 | 58.075 | 73.406 | 54.891 | 0.00 | 0.00 |
| ATOM | 22144 | N    | ASN | 1480 | 57.564 | 74.406 | 53.001 | 0.00 | 0.00 |
| ATOM | 22145 | H    | ASN | 1480 | 57.054 | 74.285 | 52.137 | 0.00 | 0.00 |
| ATOM | 22146 | CA   | ASN | 1480 | 58.235 | 75.688 | 53.199 | 0.00 | 0.00 |

|            |               |        |        |        |      |      |
|------------|---------------|--------|--------|--------|------|------|
| ATOM 22147 | HA ASN 1480   | 58.297 | 76.128 | 52.204 | 0.00 | 0.00 |
| ATOM 22148 | CB ASN 1480   | 57.333 | 76.624 | 53.968 | 0.00 | 0.00 |
| ATOM 22149 | HB2 ASN 1480  | 57.352 | 76.266 | 54.997 | 0.00 | 0.00 |
| ATOM 22150 | HB3 ASN 1480  | 56.324 | 76.628 | 53.556 | 0.00 | 0.00 |
| ATOM 22151 | CG ASN 1480   | 57.735 | 78.105 | 53.971 | 0.00 | 0.00 |
| ATOM 22152 | OD1 ASN 1480  | 58.435 | 78.627 | 53.129 | 0.00 | 0.00 |
| ATOM 22153 | ND2 ASN 1480  | 57.078 | 78.846 | 54.774 | 0.00 | 0.00 |
| ATOM 22154 | 1HD2 ASN 1480 | 57.344 | 79.800 | 54.973 | 0.00 | 0.00 |
| ATOM 22155 | 2HD2 ASN 1480 | 56.274 | 78.478 | 55.262 | 0.00 | 0.00 |
| ATOM 22156 | C ASN 1480    | 59.801 | 75.614 | 53.630 | 0.00 | 0.00 |
| ATOM 22157 | O ASN 1480    | 60.210 | 76.168 | 54.653 | 0.00 | 0.00 |
| ATOM 22158 | N LEU 1481    | 60.626 | 74.954 | 52.803 | 0.00 | 0.00 |
| ATOM 22159 | H LEU 1481    | 60.227 | 74.725 | 51.904 | 0.00 | 0.00 |
| ATOM 22160 | CA LEU 1481   | 62.063 | 74.660 | 52.909 | 0.00 | 0.00 |
| ATOM 22161 | HA LEU 1481   | 62.197 | 74.607 | 53.990 | 0.00 | 0.00 |
| ATOM 22162 | CB LEU 1481   | 62.374 | 73.258 | 52.343 | 0.00 | 0.00 |
| ATOM 22163 | HB2 LEU 1481  | 62.346 | 73.400 | 51.262 | 0.00 | 0.00 |
| ATOM 22164 | HB3 LEU 1481  | 63.416 | 73.005 | 52.539 | 0.00 | 0.00 |
| ATOM 22165 | CG LEU 1481   | 61.518 | 72.049 | 52.776 | 0.00 | 0.00 |
| ATOM 22166 | HG LEU 1481   | 60.540 | 72.219 | 52.327 | 0.00 | 0.00 |
| ATOM 22167 | CD1 LEU 1481  | 62.034 | 70.714 | 52.289 | 0.00 | 0.00 |
| ATOM 22168 | 1HD1 LEU 1481 | 61.364 | 69.905 | 52.579 | 0.00 | 0.00 |
| ATOM 22169 | 2HD1 LEU 1481 | 62.177 | 70.731 | 51.209 | 0.00 | 0.00 |
| ATOM 22170 | 3HD1 LEU 1481 | 62.962 | 70.379 | 52.752 | 0.00 | 0.00 |
| ATOM 22171 | CD2 LEU 1481  | 61.321 | 71.986 | 54.323 | 0.00 | 0.00 |
| ATOM 22172 | 1HD2 LEU 1481 | 60.950 | 71.025 | 54.680 | 0.00 | 0.00 |



|      |       |      |     |      |        |        |        |      |      |
|------|-------|------|-----|------|--------|--------|--------|------|------|
| ATOM | 22173 | 2HD2 | LEU | 1481 | 62.284 | 72.000 | 54.834 | 0.00 | 0.00 |
| ATOM | 22174 | 3HD2 | LEU | 1481 | 60.702 | 72.806 | 54.686 | 0.00 | 0.00 |
| ATOM | 22175 | C    | LEU | 1481 | 62.917 | 75.798 | 52.265 | 0.00 | 0.00 |
| ATOM | 22176 | O    | LEU | 1481 | 62.302 | 76.574 | 51.523 | 0.00 | 0.00 |
| ATOM | 22177 | N    | ARG | 1482 | 64.254 | 75.854 | 52.516 | 0.00 | 0.00 |
| ATOM | 22178 | H    | ARG | 1482 | 64.521 | 75.051 | 53.068 | 0.00 | 0.00 |
| ATOM | 22179 | CA   | ARG | 1482 | 65.151 | 76.903 | 52.017 | 0.00 | 0.00 |
| ATOM | 22180 | HA   | ARG | 1482 | 64.723 | 77.435 | 51.167 | 0.00 | 0.00 |
| ATOM | 22181 | CB   | ARG | 1482 | 65.189 | 77.946 | 53.188 | 0.00 | 0.00 |
| ATOM | 22182 | HB2  | ARG | 1482 | 64.158 | 78.298 | 53.160 | 0.00 | 0.00 |
| ATOM | 22183 | HB3  | ARG | 1482 | 65.352 | 77.428 | 54.134 | 0.00 | 0.00 |
| ATOM | 22184 | CG   | ARG | 1482 | 66.193 | 79.179 | 53.132 | 0.00 | 0.00 |
| ATOM | 22185 | HG2  | ARG | 1482 | 66.286 | 79.691 | 54.090 | 0.00 | 0.00 |
| ATOM | 22186 | HG3  | ARG | 1482 | 67.167 | 78.801 | 52.822 | 0.00 | 0.00 |
| ATOM | 22187 | CD   | ARG | 1482 | 65.748 | 80.207 | 52.080 | 0.00 | 0.00 |
| ATOM | 22188 | HD2  | ARG | 1482 | 65.605 | 79.799 | 51.079 | 0.00 | 0.00 |
| ATOM | 22189 | HD3  | ARG | 1482 | 64.758 | 80.477 | 52.447 | 0.00 | 0.00 |
| ATOM | 22190 | NE   | ARG | 1482 | 66.707 | 81.372 | 52.040 | 0.00 | 0.00 |
| ATOM | 22191 | HE   | ARG | 1482 | 67.549 | 81.215 | 52.574 | 0.00 | 0.00 |
| ATOM | 22192 | CZ   | ARG | 1482 | 66.662 | 82.381 | 51.196 | 0.00 | 0.00 |
| ATOM | 22193 | NH1  | ARG | 1482 | 65.619 | 82.532 | 50.442 | 0.00 | 0.00 |
| ATOM | 22194 | 1HH1 | ARG | 1482 | 65.433 | 83.426 | 50.010 | 0.00 | 0.00 |
| ATOM | 22195 | 2HH1 | ARG | 1482 | 64.779 | 82.023 | 50.677 | 0.00 | 0.00 |
| ATOM | 22196 | NH2  | ARG | 1482 | 67.688 | 83.074 | 51.000 | 0.00 | 0.00 |
| ATOM | 22197 | 1HH2 | ARG | 1482 | 67.604 | 83.744 | 50.248 | 0.00 | 0.00 |
| ATOM | 22198 | 2HH2 | ARG | 1482 | 68.496 | 82.718 | 51.491 | 0.00 | 0.00 |

|      |       |     |     |      |        |        |        |      |      |
|------|-------|-----|-----|------|--------|--------|--------|------|------|
| ATOM | 22199 | C   | ARG | 1482 | 66.599 | 76.493 | 51.534 | 0.00 | 0.00 |
| ATOM | 22200 | O   | ARG | 1482 | 67.370 | 77.298 | 50.996 | 0.00 | 0.00 |
| ATOM | 22201 | N   | SER | 1483 | 66.910 | 75.227 | 51.682 | 0.00 | 0.00 |
| ATOM | 22202 | H   | SER | 1483 | 66.246 | 74.711 | 52.241 | 0.00 | 0.00 |
| ATOM | 22203 | CA  | SER | 1483 | 68.139 | 74.653 | 51.159 | 0.00 | 0.00 |
| ATOM | 22204 | HA  | SER | 1483 | 68.810 | 75.321 | 51.698 | 0.00 | 0.00 |
| ATOM | 22205 | CB  | SER | 1483 | 68.371 | 73.178 | 51.495 | 0.00 | 0.00 |
| ATOM | 22206 | HB2 | SER | 1483 | 67.629 | 72.623 | 50.921 | 0.00 | 0.00 |
| ATOM | 22207 | HB3 | SER | 1483 | 69.307 | 72.827 | 51.060 | 0.00 | 0.00 |
| ATOM | 22208 | OG  | SER | 1483 | 68.321 | 72.795 | 52.848 | 0.00 | 0.00 |
| ATOM | 22209 | HG  | SER | 1483 | 67.396 | 72.744 | 53.101 | 0.00 | 0.00 |
| ATOM | 22210 | C   | SER | 1483 | 68.274 | 74.907 | 49.643 | 0.00 | 0.00 |
| ATOM | 22211 | O   | SER | 1483 | 67.316 | 74.938 | 48.909 | 0.00 | 0.00 |
| ATOM | 22212 | N   | ALA | 1484 | 69.528 | 75.003 | 49.119 | 0.00 | 0.00 |
| ATOM | 22213 | H   | ALA | 1484 | 70.351 | 75.086 | 49.699 | 0.00 | 0.00 |
| ATOM | 22214 | CA  | ALA | 1484 | 69.666 | 74.705 | 47.700 | 0.00 | 0.00 |
| ATOM | 22215 | HA  | ALA | 1484 | 69.039 | 75.386 | 47.125 | 0.00 | 0.00 |
| ATOM | 22216 | CB  | ALA | 1484 | 71.118 | 74.888 | 47.361 | 0.00 | 0.00 |
| ATOM | 22217 | HB1 | ALA | 1484 | 71.310 | 74.903 | 46.288 | 0.00 | 0.00 |
| ATOM | 22218 | HB2 | ALA | 1484 | 71.402 | 75.922 | 47.553 | 0.00 | 0.00 |
| ATOM | 22219 | HB3 | ALA | 1484 | 71.761 | 74.107 | 47.768 | 0.00 | 0.00 |
| ATOM | 22220 | C   | ALA | 1484 | 69.172 | 73.228 | 47.497 | 0.00 | 0.00 |
| ATOM | 22221 | O   | ALA | 1484 | 69.095 | 72.402 | 48.439 | 0.00 | 0.00 |
| ATOM | 22222 | N   | ILE | 1485 | 68.892 | 72.849 | 46.229 | 0.00 | 0.00 |
| ATOM | 22223 | H   | ILE | 1485 | 69.121 | 73.448 | 45.449 | 0.00 | 0.00 |
| ATOM | 22224 | CA  | ILE | 1485 | 68.446 | 71.577 | 45.775 | 0.00 | 0.00 |

|      |       |      |     |      |        |        |        |      |      |
|------|-------|------|-----|------|--------|--------|--------|------|------|
| ATOM | 22225 | HA   | ILE | 1485 | 68.663 | 70.828 | 46.536 | 0.00 | 0.00 |
| ATOM | 22226 | CB   | ILE | 1485 | 66.927 | 71.705 | 45.518 | 0.00 | 0.00 |
| ATOM | 22227 | HB   | ILE | 1485 | 66.785 | 70.977 | 44.721 | 0.00 | 0.00 |
| ATOM | 22228 | CG2  | ILE | 1485 | 66.125 | 71.364 | 46.802 | 0.00 | 0.00 |
| ATOM | 22229 | 1HG2 | ILE | 1485 | 65.038 | 71.421 | 46.751 | 0.00 | 0.00 |
| ATOM | 22230 | 2HG2 | ILE | 1485 | 66.260 | 70.310 | 47.046 | 0.00 | 0.00 |
| ATOM | 22231 | 3HG2 | ILE | 1485 | 66.469 | 72.023 | 47.599 | 0.00 | 0.00 |
| ATOM | 22232 | CG1  | ILE | 1485 | 66.405 | 72.968 | 44.847 | 0.00 | 0.00 |
| ATOM | 22233 | 2HG1 | ILE | 1485 | 66.522 | 73.754 | 45.593 | 0.00 | 0.00 |
| ATOM | 22234 | 3HG1 | ILE | 1485 | 67.007 | 73.220 | 43.973 | 0.00 | 0.00 |
| ATOM | 22235 | CD1  | ILE | 1485 | 64.934 | 72.927 | 44.459 | 0.00 | 0.00 |
| ATOM | 22236 | 1HD1 | ILE | 1485 | 64.579 | 72.025 | 43.960 | 0.00 | 0.00 |
| ATOM | 22237 | 2HD1 | ILE | 1485 | 64.286 | 73.101 | 45.318 | 0.00 | 0.00 |
| ATOM | 22238 | 3HD1 | ILE | 1485 | 64.894 | 73.785 | 43.788 | 0.00 | 0.00 |
| ATOM | 22239 | C    | ILE | 1485 | 69.122 | 71.230 | 44.440 | 0.00 | 0.00 |
| ATOM | 22240 | O    | ILE | 1485 | 69.536 | 72.046 | 43.662 | 0.00 | 0.00 |
| ATOM | 22241 | N    | ALA | 1486 | 69.111 | 69.931 | 44.087 | 0.00 | 0.00 |
| ATOM | 22242 | H    | ALA | 1486 | 68.923 | 69.159 | 44.711 | 0.00 | 0.00 |
| ATOM | 22243 | CA   | ALA | 1486 | 69.278 | 69.459 | 42.722 | 0.00 | 0.00 |
| ATOM | 22244 | HA   | ALA | 1486 | 68.813 | 70.171 | 42.040 | 0.00 | 0.00 |
| ATOM | 22245 | CB   | ALA | 1486 | 70.794 | 69.319 | 42.438 | 0.00 | 0.00 |
| ATOM | 22246 | HB1  | ALA | 1486 | 70.948 | 68.753 | 41.519 | 0.00 | 0.00 |
| ATOM | 22247 | HB2  | ALA | 1486 | 71.287 | 70.290 | 42.395 | 0.00 | 0.00 |
| ATOM | 22248 | HB3  | ALA | 1486 | 71.328 | 68.834 | 43.255 | 0.00 | 0.00 |
| ATOM | 22249 | C    | ALA | 1486 | 68.570 | 68.087 | 42.559 | 0.00 | 0.00 |
| ATOM | 22250 | O    | ALA | 1486 | 68.319 | 67.343 | 43.515 | 0.00 | 0.00 |

|      |       |      |     |      |        |        |        |      |      |
|------|-------|------|-----|------|--------|--------|--------|------|------|
| ATOM | 22251 | N    | VAL | 1487 | 68.287 | 67.705 | 41.290 | 0.00 | 0.00 |
| ATOM | 22252 | H    | VAL | 1487 | 68.497 | 68.417 | 40.605 | 0.00 | 0.00 |
| ATOM | 22253 | CA   | VAL | 1487 | 67.755 | 66.363 | 40.887 | 0.00 | 0.00 |
| ATOM | 22254 | HA   | VAL | 1487 | 67.154 | 65.989 | 41.715 | 0.00 | 0.00 |
| ATOM | 22255 | CB   | VAL | 1487 | 66.778 | 66.428 | 39.656 | 0.00 | 0.00 |
| ATOM | 22256 | HB   | VAL | 1487 | 66.246 | 67.380 | 39.644 | 0.00 | 0.00 |
| ATOM | 22257 | CG1  | VAL | 1487 | 67.459 | 66.426 | 38.264 | 0.00 | 0.00 |
| ATOM | 22258 | 1HG1 | VAL | 1487 | 68.267 | 65.699 | 38.195 | 0.00 | 0.00 |
| ATOM | 22259 | 2HG1 | VAL | 1487 | 66.716 | 66.426 | 37.466 | 0.00 | 0.00 |
| ATOM | 22260 | 3HG1 | VAL | 1487 | 67.955 | 67.396 | 38.228 | 0.00 | 0.00 |
| ATOM | 22261 | CG2  | VAL | 1487 | 65.726 | 65.326 | 39.660 | 0.00 | 0.00 |
| ATOM | 22262 | 1HG2 | VAL | 1487 | 66.139 | 64.336 | 39.851 | 0.00 | 0.00 |
| ATOM | 22263 | 2HG2 | VAL | 1487 | 64.997 | 65.623 | 40.413 | 0.00 | 0.00 |
| ATOM | 22264 | 3HG2 | VAL | 1487 | 65.229 | 65.302 | 38.690 | 0.00 | 0.00 |
| ATOM | 22265 | C    | VAL | 1487 | 68.820 | 65.241 | 40.807 | 0.00 | 0.00 |
| ATOM | 22266 | O    | VAL | 1487 | 69.978 | 65.498 | 40.457 | 0.00 | 0.00 |
| ATOM | 22267 | N    | VAL | 1488 | 68.458 | 63.999 | 41.110 | 0.00 | 0.00 |
| ATOM | 22268 | H    | VAL | 1488 | 67.483 | 63.863 | 41.335 | 0.00 | 0.00 |
| ATOM | 22269 | CA   | VAL | 1488 | 69.236 | 62.783 | 40.688 | 0.00 | 0.00 |
| ATOM | 22270 | HA   | VAL | 1488 | 70.268 | 62.853 | 41.032 | 0.00 | 0.00 |
| ATOM | 22271 | CB   | VAL | 1488 | 68.651 | 61.501 | 41.300 | 0.00 | 0.00 |
| ATOM | 22272 | HB   | VAL | 1488 | 69.160 | 60.690 | 40.781 | 0.00 | 0.00 |
| ATOM | 22273 | CG1  | VAL | 1488 | 69.140 | 61.506 | 42.749 | 0.00 | 0.00 |
| ATOM | 22274 | 1HG1 | VAL | 1488 | 68.756 | 62.392 | 43.256 | 0.00 | 0.00 |
| ATOM | 22275 | 2HG1 | VAL | 1488 | 68.681 | 60.689 | 43.306 | 0.00 | 0.00 |
| ATOM | 22276 | 3HG1 | VAL | 1488 | 70.224 | 61.573 | 42.838 | 0.00 | 0.00 |

|      |       |      |     |      |        |        |        |      |      |
|------|-------|------|-----|------|--------|--------|--------|------|------|
| ATOM | 22277 | CG2  | VAL | 1488 | 67.132 | 61.302 | 41.273 | 0.00 | 0.00 |
| ATOM | 22278 | 1HG2 | VAL | 1488 | 66.861 | 60.470 | 41.924 | 0.00 | 0.00 |
| ATOM | 22279 | 2HG2 | VAL | 1488 | 66.604 | 62.171 | 41.663 | 0.00 | 0.00 |
| ATOM | 22280 | 3HG2 | VAL | 1488 | 66.870 | 61.073 | 40.240 | 0.00 | 0.00 |
| ATOM | 22281 | C    | VAL | 1488 | 69.333 | 62.569 | 39.192 | 0.00 | 0.00 |
| ATOM | 22282 | O    | VAL | 1488 | 68.317 | 62.757 | 38.499 | 0.00 | 0.00 |
| ATOM | 22283 | N    | LYS | 1489 | 70.506 | 62.161 | 38.649 | 0.00 | 0.00 |
| ATOM | 22284 | H    | LYS | 1489 | 71.345 | 62.118 | 39.210 | 0.00 | 0.00 |
| ATOM | 22285 | CA   | LYS | 1489 | 70.750 | 62.043 | 37.205 | 0.00 | 0.00 |
| ATOM | 22286 | HA   | LYS | 1489 | 69.798 | 62.147 | 36.684 | 0.00 | 0.00 |
| ATOM | 22287 | CB   | LYS | 1489 | 71.610 | 63.232 | 36.732 | 0.00 | 0.00 |
| ATOM | 22288 | HB2  | LYS | 1489 | 72.444 | 63.349 | 37.424 | 0.00 | 0.00 |
| ATOM | 22289 | HB3  | LYS | 1489 | 72.147 | 63.002 | 35.812 | 0.00 | 0.00 |
| ATOM | 22290 | CG   | LYS | 1489 | 70.726 | 64.546 | 36.676 | 0.00 | 0.00 |
| ATOM | 22291 | HG2  | LYS | 1489 | 70.145 | 64.641 | 37.593 | 0.00 | 0.00 |
| ATOM | 22292 | HG3  | LYS | 1489 | 71.411 | 65.376 | 36.509 | 0.00 | 0.00 |
| ATOM | 22293 | CD   | LYS | 1489 | 69.777 | 64.623 | 35.391 | 0.00 | 0.00 |
| ATOM | 22294 | HD2  | LYS | 1489 | 70.235 | 64.299 | 34.457 | 0.00 | 0.00 |
| ATOM | 22295 | HD3  | LYS | 1489 | 68.930 | 63.953 | 35.544 | 0.00 | 0.00 |
| ATOM | 22296 | CE   | LYS | 1489 | 69.134 | 65.978 | 35.089 | 0.00 | 0.00 |
| ATOM | 22297 | HE2  | LYS | 1489 | 68.569 | 66.344 | 35.946 | 0.00 | 0.00 |
| ATOM | 22298 | HE3  | LYS | 1489 | 69.887 | 66.723 | 34.829 | 0.00 | 0.00 |
| ATOM | 22299 | NZ   | LYS | 1489 | 68.148 | 65.889 | 33.960 | 0.00 | 0.00 |
| ATOM | 22300 | HZ1  | LYS | 1489 | 68.568 | 65.546 | 33.108 | 0.00 | 0.00 |
| ATOM | 22301 | HZ2  | LYS | 1489 | 67.300 | 65.372 | 34.145 | 0.00 | 0.00 |
| ATOM | 22302 | HZ3  | LYS | 1489 | 67.832 | 66.830 | 33.774 | 0.00 | 0.00 |

|      |       |     |     |      |        |        |        |      |      |
|------|-------|-----|-----|------|--------|--------|--------|------|------|
| ATOM | 22303 | C   | LYS | 1489 | 71.389 | 60.676 | 36.927 | 0.00 | 0.00 |
| ATOM | 22304 | O   | LYS | 1489 | 72.376 | 60.417 | 37.687 | 0.00 | 0.00 |
| ATOM | 22305 | N   | GLY | 1490 | 70.908 | 59.745 | 36.112 | 0.00 | 0.00 |
| ATOM | 22306 | H   | GLY | 1490 | 70.135 | 60.026 | 35.527 | 0.00 | 0.00 |
| ATOM | 22307 | CA  | GLY | 1490 | 71.694 | 58.515 | 35.681 | 0.00 | 0.00 |
| ATOM | 22308 | HA2 | GLY | 1490 | 71.414 | 58.432 | 34.631 | 0.00 | 0.00 |
| ATOM | 22309 | HA3 | GLY | 1490 | 72.770 | 58.688 | 35.718 | 0.00 | 0.00 |
| ATOM | 22310 | C   | GLY | 1490 | 71.331 | 57.239 | 36.405 | 0.00 | 0.00 |
| ATOM | 22311 | O   | GLY | 1490 | 71.904 | 56.183 | 36.119 | 0.00 | 0.00 |
| ATOM | 22312 | N   | CYS | 1491 | 70.326 | 57.300 | 37.355 | 0.00 | 0.00 |
| ATOM | 22313 | H   | CYS | 1491 | 70.064 | 58.188 | 37.758 | 0.00 | 0.00 |
| ATOM | 22314 | CA  | CYS | 1491 | 70.042 | 56.150 | 38.318 | 0.00 | 0.00 |
| ATOM | 22315 | HA  | CYS | 1491 | 70.886 | 56.013 | 38.994 | 0.00 | 0.00 |
| ATOM | 22316 | CB  | CYS | 1491 | 68.810 | 56.537 | 39.260 | 0.00 | 0.00 |
| ATOM | 22317 | HB2 | CYS | 1491 | 68.146 | 57.193 | 38.698 | 0.00 | 0.00 |
| ATOM | 22318 | HB3 | CYS | 1491 | 68.332 | 55.621 | 39.608 | 0.00 | 0.00 |
| ATOM | 22319 | SG  | CYS | 1491 | 69.447 | 57.485 | 40.703 | 0.00 | 0.00 |
| ATOM | 22320 | HG  | CYS | 1491 | 69.042 | 58.632 | 40.150 | 0.00 | 0.00 |
| ATOM | 22321 | C   | CYS | 1491 | 69.720 | 54.818 | 37.583 | 0.00 | 0.00 |
| ATOM | 22322 | O   | CYS | 1491 | 69.612 | 53.786 | 38.220 | 0.00 | 0.00 |
| ATOM | 22323 | N   | ARG | 1492 | 69.385 | 54.826 | 36.287 | 0.00 | 0.00 |
| ATOM | 22324 | H   | ARG | 1492 | 69.478 | 55.726 | 35.838 | 0.00 | 0.00 |
| ATOM | 22325 | CA  | ARG | 1492 | 69.095 | 53.615 | 35.439 | 0.00 | 0.00 |
| ATOM | 22326 | HA  | ARG | 1492 | 69.038 | 52.812 | 36.173 | 0.00 | 0.00 |
| ATOM | 22327 | CB  | ARG | 1492 | 67.733 | 53.765 | 34.710 | 0.00 | 0.00 |
| ATOM | 22328 | HB2 | ARG | 1492 | 67.777 | 54.597 | 34.008 | 0.00 | 0.00 |

|      |       |      |     |      |        |        |        |      |      |
|------|-------|------|-----|------|--------|--------|--------|------|------|
| ATOM | 22329 | HB3  | ARG | 1492 | 67.558 | 52.907 | 34.062 | 0.00 | 0.00 |
| ATOM | 22330 | CG   | ARG | 1492 | 66.553 | 53.725 | 35.697 | 0.00 | 0.00 |
| ATOM | 22331 | HG2  | ARG | 1492 | 66.659 | 54.501 | 36.456 | 0.00 | 0.00 |
| ATOM | 22332 | HG3  | ARG | 1492 | 65.719 | 54.073 | 35.088 | 0.00 | 0.00 |
| ATOM | 22333 | CD   | ARG | 1492 | 66.334 | 52.460 | 36.445 | 0.00 | 0.00 |
| ATOM | 22334 | HD2  | ARG | 1492 | 65.262 | 52.403 | 36.637 | 0.00 | 0.00 |
| ATOM | 22335 | HD3  | ARG | 1492 | 66.481 | 51.603 | 35.788 | 0.00 | 0.00 |
| ATOM | 22336 | NE   | ARG | 1492 | 67.157 | 52.413 | 37.659 | 0.00 | 0.00 |
| ATOM | 22337 | HE   | ARG | 1492 | 67.698 | 53.204 | 37.975 | 0.00 | 0.00 |
| ATOM | 22338 | CZ   | ARG | 1492 | 67.303 | 51.390 | 38.481 | 0.00 | 0.00 |
| ATOM | 22339 | NH1  | ARG | 1492 | 66.567 | 50.325 | 38.409 | 0.00 | 0.00 |
| ATOM | 22340 | 1HH1 | ARG | 1492 | 66.731 | 49.508 | 38.978 | 0.00 | 0.00 |
| ATOM | 22341 | 2HH1 | ARG | 1492 | 65.879 | 50.335 | 37.669 | 0.00 | 0.00 |
| ATOM | 22342 | NH2  | ARG | 1492 | 68.170 | 51.458 | 39.412 | 0.00 | 0.00 |
| ATOM | 22343 | 1HH2 | ARG | 1492 | 68.269 | 50.718 | 40.093 | 0.00 | 0.00 |
| ATOM | 22344 | 2HH2 | ARG | 1492 | 68.761 | 52.275 | 39.461 | 0.00 | 0.00 |
| ATOM | 22345 | C    | ARG | 1492 | 70.272 | 53.324 | 34.459 | 0.00 | 0.00 |
| ATOM | 22346 | O    | ARG | 1492 | 70.563 | 52.187 | 34.178 | 0.00 | 0.00 |
| ATOM | 22347 | N    | THR | 1493 | 71.018 | 54.334 | 33.946 | 0.00 | 0.00 |
| ATOM | 22348 | H    | THR | 1493 | 70.567 | 55.206 | 34.185 | 0.00 | 0.00 |
| ATOM | 22349 | CA   | THR | 1493 | 72.105 | 54.073 | 33.005 | 0.00 | 0.00 |
| ATOM | 22350 | HA   | THR | 1493 | 71.884 | 53.208 | 32.380 | 0.00 | 0.00 |
| ATOM | 22351 | CB   | THR | 1493 | 72.387 | 55.263 | 32.078 | 0.00 | 0.00 |
| ATOM | 22352 | HB   | THR | 1493 | 73.144 | 54.987 | 31.344 | 0.00 | 0.00 |
| ATOM | 22353 | CG2  | THR | 1493 | 71.186 | 55.566 | 31.219 | 0.00 | 0.00 |
| ATOM | 22354 | 1HG2 | THR | 1493 | 70.311 | 55.719 | 31.851 | 0.00 | 0.00 |

|      |       |      |     |      |        |        |        |      |      |
|------|-------|------|-----|------|--------|--------|--------|------|------|
| ATOM | 22355 | 2HG2 | THR | 1493 | 71.523 | 56.449 | 30.677 | 0.00 | 0.00 |
| ATOM | 22356 | 3HG2 | THR | 1493 | 70.916 | 54.781 | 30.512 | 0.00 | 0.00 |
| ATOM | 22357 | OG1  | THR | 1493 | 72.831 | 56.391 | 32.806 | 0.00 | 0.00 |
| ATOM | 22358 | HG1  | THR | 1493 | 72.770 | 57.205 | 32.301 | 0.00 | 0.00 |
| ATOM | 22359 | C    | THR | 1493 | 73.420 | 53.533 | 33.646 | 0.00 | 0.00 |
| ATOM | 22360 | O    | THR | 1493 | 74.346 | 53.057 | 32.876 | 0.00 | 0.00 |
| ATOM | 22361 | N    | VAL | 1494 | 73.568 | 53.535 | 34.961 | 0.00 | 0.00 |
| ATOM | 22362 | H    | VAL | 1494 | 72.808 | 53.772 | 35.582 | 0.00 | 0.00 |
| ATOM | 22363 | CA   | VAL | 1494 | 74.760 | 53.064 | 35.662 | 0.00 | 0.00 |
| ATOM | 22364 | HA   | VAL | 1494 | 75.649 | 53.481 | 35.189 | 0.00 | 0.00 |
| ATOM | 22365 | CB   | VAL | 1494 | 74.814 | 53.614 | 37.117 | 0.00 | 0.00 |
| ATOM | 22366 | HB   | VAL | 1494 | 75.003 | 54.678 | 36.973 | 0.00 | 0.00 |
| ATOM | 22367 | CG1  | VAL | 1494 | 73.509 | 53.499 | 37.818 | 0.00 | 0.00 |
| ATOM | 22368 | 1HG1 | VAL | 1494 | 72.711 | 53.920 | 37.206 | 0.00 | 0.00 |
| ATOM | 22369 | 2HG1 | VAL | 1494 | 73.331 | 52.424 | 37.838 | 0.00 | 0.00 |
| ATOM | 22370 | 3HG1 | VAL | 1494 | 73.463 | 53.883 | 38.837 | 0.00 | 0.00 |
| ATOM | 22371 | CG2  | VAL | 1494 | 75.828 | 52.975 | 37.976 | 0.00 | 0.00 |
| ATOM | 22372 | 1HG2 | VAL | 1494 | 75.884 | 51.887 | 38.018 | 0.00 | 0.00 |
| ATOM | 22373 | 2HG2 | VAL | 1494 | 76.766 | 53.222 | 37.479 | 0.00 | 0.00 |
| ATOM | 22374 | 3HG2 | VAL | 1494 | 75.784 | 53.360 | 38.995 | 0.00 | 0.00 |
| ATOM | 22375 | C    | VAL | 1494 | 74.729 | 51.514 | 35.632 | 0.00 | 0.00 |
| ATOM | 22376 | O    | VAL | 1494 | 73.641 | 50.934 | 35.763 | 0.00 | 0.00 |
| ATOM | 22377 | N    | GLN | 1495 | 75.908 | 50.912 | 35.554 | 0.00 | 0.00 |
| ATOM | 22378 | H    | GLN | 1495 | 76.748 | 51.471 | 35.499 | 0.00 | 0.00 |
| ATOM | 22379 | CA   | GLN | 1495 | 76.261 | 49.486 | 35.657 | 0.00 | 0.00 |
| ATOM | 22380 | HA   | GLN | 1495 | 75.464 | 48.884 | 36.094 | 0.00 | 0.00 |



|      |       |      |     |      |        |        |        |      |      |
|------|-------|------|-----|------|--------|--------|--------|------|------|
| ATOM | 22381 | CB   | GLN | 1495 | 76.473 | 49.025 | 34.201 | 0.00 | 0.00 |
| ATOM | 22382 | HB2  | GLN | 1495 | 77.321 | 49.570 | 33.786 | 0.00 | 0.00 |
| ATOM | 22383 | HB3  | GLN | 1495 | 76.682 | 47.958 | 34.114 | 0.00 | 0.00 |
| ATOM | 22384 | CG   | GLN | 1495 | 75.300 | 49.381 | 33.252 | 0.00 | 0.00 |
| ATOM | 22385 | HG2  | GLN | 1495 | 74.359 | 49.140 | 33.747 | 0.00 | 0.00 |
| ATOM | 22386 | HG3  | GLN | 1495 | 75.273 | 50.440 | 32.997 | 0.00 | 0.00 |
| ATOM | 22387 | CD   | GLN | 1495 | 75.254 | 48.538 | 31.953 | 0.00 | 0.00 |
| ATOM | 22388 | OE1  | GLN | 1495 | 76.152 | 47.727 | 31.626 | 0.00 | 0.00 |
| ATOM | 22389 | NE2  | GLN | 1495 | 74.194 | 48.800 | 31.137 | 0.00 | 0.00 |
| ATOM | 22390 | 1HE2 | GLN | 1495 | 74.190 | 48.361 | 30.227 | 0.00 | 0.00 |
| ATOM | 22391 | 2HE2 | GLN | 1495 | 73.561 | 49.551 | 31.374 | 0.00 | 0.00 |
| ATOM | 22392 | C    | GLN | 1495 | 77.495 | 49.212 | 36.510 | 0.00 | 0.00 |
| ATOM | 22393 | O    | GLN | 1495 | 78.123 | 50.125 | 37.005 | 0.00 | 0.00 |
| ATOM | 22394 | N    | LYS | 1496 | 77.786 | 47.897 | 36.701 | 0.00 | 0.00 |
| ATOM | 22395 | H    | LYS | 1496 | 77.057 | 47.274 | 36.385 | 0.00 | 0.00 |
| ATOM | 22396 | CA   | LYS | 1496 | 78.942 | 47.532 | 37.485 | 0.00 | 0.00 |
| ATOM | 22397 | HA   | LYS | 1496 | 78.873 | 48.039 | 38.448 | 0.00 | 0.00 |
| ATOM | 22398 | CB   | LYS | 1496 | 78.816 | 46.007 | 37.767 | 0.00 | 0.00 |
| ATOM | 22399 | HB2  | LYS | 1496 | 77.806 | 45.837 | 38.143 | 0.00 | 0.00 |
| ATOM | 22400 | HB3  | LYS | 1496 | 78.860 | 45.509 | 36.799 | 0.00 | 0.00 |
| ATOM | 22401 | CG   | LYS | 1496 | 79.887 | 45.438 | 38.719 | 0.00 | 0.00 |
| ATOM | 22402 | HG2  | LYS | 1496 | 79.716 | 44.361 | 38.694 | 0.00 | 0.00 |
| ATOM | 22403 | HG3  | LYS | 1496 | 80.848 | 45.674 | 38.262 | 0.00 | 0.00 |
| ATOM | 22404 | CD   | LYS | 1496 | 79.942 | 46.083 | 40.092 | 0.00 | 0.00 |
| ATOM | 22405 | HD2  | LYS | 1496 | 80.525 | 46.994 | 39.961 | 0.00 | 0.00 |
| ATOM | 22406 | HD3  | LYS | 1496 | 78.955 | 46.376 | 40.451 | 0.00 | 0.00 |

|      |       |     |     |      |        |        |        |      |      |
|------|-------|-----|-----|------|--------|--------|--------|------|------|
| ATOM | 22407 | CE  | LYS | 1496 | 80.727 | 45.294 | 41.215 | 0.00 | 0.00 |
| ATOM | 22408 | HE2 | LYS | 1496 | 80.504 | 45.740 | 42.184 | 0.00 | 0.00 |
| ATOM | 22409 | HE3 | LYS | 1496 | 80.475 | 44.236 | 41.139 | 0.00 | 0.00 |
| ATOM | 22410 | NZ  | LYS | 1496 | 82.175 | 45.321 | 40.987 | 0.00 | 0.00 |
| ATOM | 22411 | HZ1 | LYS | 1496 | 82.726 | 45.122 | 41.810 | 0.00 | 0.00 |
| ATOM | 22412 | HZ2 | LYS | 1496 | 82.541 | 44.698 | 40.283 | 0.00 | 0.00 |
| ATOM | 22413 | HZ3 | LYS | 1496 | 82.378 | 46.256 | 40.665 | 0.00 | 0.00 |
| ATOM | 22414 | C   | LYS | 1496 | 80.294 | 47.921 | 36.868 | 0.00 | 0.00 |
| ATOM | 22415 | O   | LYS | 1496 | 81.127 | 48.485 | 37.530 | 0.00 | 0.00 |
| ATOM | 22416 | N   | ALA | 1497 | 80.516 | 47.596 | 35.604 | 0.00 | 0.00 |
| ATOM | 22417 | H   | ALA | 1497 | 79.816 | 47.159 | 35.021 | 0.00 | 0.00 |
| ATOM | 22418 | CA  | ALA | 1497 | 81.753 | 48.007 | 34.931 | 0.00 | 0.00 |
| ATOM | 22419 | HA  | ALA | 1497 | 82.592 | 47.589 | 35.488 | 0.00 | 0.00 |
| ATOM | 22420 | CB  | ALA | 1497 | 81.858 | 47.170 | 33.603 | 0.00 | 0.00 |
| ATOM | 22421 | HB1 | ALA | 1497 | 81.857 | 46.098 | 33.800 | 0.00 | 0.00 |
| ATOM | 22422 | HB2 | ALA | 1497 | 81.020 | 47.454 | 32.967 | 0.00 | 0.00 |
| ATOM | 22423 | HB3 | ALA | 1497 | 82.759 | 47.334 | 33.011 | 0.00 | 0.00 |
| ATOM | 22424 | C   | ALA | 1497 | 82.030 | 49.530 | 34.720 | 0.00 | 0.00 |
| ATOM | 22425 | O   | ALA | 1497 | 83.033 | 49.846 | 34.076 | 0.00 | 0.00 |
| ATOM | 22426 | N   | ASP | 1498 | 81.159 | 50.400 | 35.282 | 0.00 | 0.00 |
| ATOM | 22427 | H   | ASP | 1498 | 80.407 | 50.037 | 35.851 | 0.00 | 0.00 |
| ATOM | 22428 | CA  | ASP | 1498 | 81.399 | 51.888 | 35.374 | 0.00 | 0.00 |
| ATOM | 22429 | HA  | ASP | 1498 | 82.206 | 52.176 | 34.700 | 0.00 | 0.00 |
| ATOM | 22430 | CB  | ASP | 1498 | 80.031 | 52.558 | 35.073 | 0.00 | 0.00 |
| ATOM | 22431 | HB2 | ASP | 1498 | 79.367 | 52.258 | 35.883 | 0.00 | 0.00 |
| ATOM | 22432 | HB3 | ASP | 1498 | 80.178 | 53.634 | 35.164 | 0.00 | 0.00 |

|      |       |     |     |      |        |        |        |      |      |
|------|-------|-----|-----|------|--------|--------|--------|------|------|
| ATOM | 22433 | CG  | ASP | 1498 | 79.334 | 52.270 | 33.807 | 0.00 | 0.00 |
| ATOM | 22434 | OD1 | ASP | 1498 | 78.116 | 52.530 | 33.676 | 0.00 | 0.00 |
| ATOM | 22435 | OD2 | ASP | 1498 | 80.058 | 51.919 | 32.832 | 0.00 | 0.00 |
| ATOM | 22436 | C   | ASP | 1498 | 81.845 | 52.359 | 36.779 | 0.00 | 0.00 |
| ATOM | 22437 | O   | ASP | 1498 | 82.327 | 53.453 | 36.926 | 0.00 | 0.00 |
| ATOM | 22438 | N   | MET | 1499 | 81.688 | 51.482 | 37.818 | 0.00 | 0.00 |
| ATOM | 22439 | H   | MET | 1499 | 81.334 | 50.549 | 37.663 | 0.00 | 0.00 |
| ATOM | 22440 | CA  | MET | 1499 | 82.165 | 51.802 | 39.136 | 0.00 | 0.00 |
| ATOM | 22441 | HA  | MET | 1499 | 81.684 | 52.726 | 39.455 | 0.00 | 0.00 |
| ATOM | 22442 | CB  | MET | 1499 | 81.863 | 50.655 | 40.096 | 0.00 | 0.00 |
| ATOM | 22443 | HB2 | MET | 1499 | 82.218 | 49.792 | 39.532 | 0.00 | 0.00 |
| ATOM | 22444 | HB3 | MET | 1499 | 82.563 | 50.558 | 40.926 | 0.00 | 0.00 |
| ATOM | 22445 | CG  | MET | 1499 | 80.380 | 50.465 | 40.445 | 0.00 | 0.00 |
| ATOM | 22446 | HG2 | MET | 1499 | 79.795 | 50.826 | 39.598 | 0.00 | 0.00 |
| ATOM | 22447 | HG3 | MET | 1499 | 80.196 | 49.409 | 40.640 | 0.00 | 0.00 |
| ATOM | 22448 | SD  | MET | 1499 | 79.787 | 51.282 | 41.969 | 0.00 | 0.00 |
| ATOM | 22449 | CE  | MET | 1499 | 79.232 | 52.799 | 41.287 | 0.00 | 0.00 |
| ATOM | 22450 | HE1 | MET | 1499 | 79.998 | 53.543 | 41.066 | 0.00 | 0.00 |
| ATOM | 22451 | HE2 | MET | 1499 | 78.687 | 52.725 | 40.347 | 0.00 | 0.00 |
| ATOM | 22452 | HE3 | MET | 1499 | 78.614 | 53.226 | 42.077 | 0.00 | 0.00 |
| ATOM | 22453 | C   | MET | 1499 | 83.655 | 52.038 | 39.118 | 0.00 | 0.00 |
| ATOM | 22454 | O   | MET | 1499 | 84.446 | 51.091 | 38.929 | 0.00 | 0.00 |
| ATOM | 22455 | N   | VAL | 1500 | 84.125 | 53.242 | 39.547 | 0.00 | 0.00 |
| ATOM | 22456 | H   | VAL | 1500 | 83.444 | 53.877 | 39.938 | 0.00 | 0.00 |
| ATOM | 22457 | CA  | VAL | 1500 | 85.430 | 53.757 | 39.201 | 0.00 | 0.00 |
| ATOM | 22458 | HA  | VAL | 1500 | 85.618 | 53.568 | 38.144 | 0.00 | 0.00 |

|      |       |      |     |      |        |        |        |      |      |
|------|-------|------|-----|------|--------|--------|--------|------|------|
| ATOM | 22459 | CB   | VAL | 1500 | 85.498 | 55.266 | 39.424 | 0.00 | 0.00 |
| ATOM | 22460 | HB   | VAL | 1500 | 85.519 | 55.408 | 40.505 | 0.00 | 0.00 |
| ATOM | 22461 | CG1  | VAL | 1500 | 86.764 | 55.764 | 38.712 | 0.00 | 0.00 |
| ATOM | 22462 | 1HG1 | VAL | 1500 | 87.750 | 55.530 | 39.114 | 0.00 | 0.00 |
| ATOM | 22463 | 2HG1 | VAL | 1500 | 86.776 | 55.354 | 37.702 | 0.00 | 0.00 |
| ATOM | 22464 | 3HG1 | VAL | 1500 | 86.678 | 56.850 | 38.685 | 0.00 | 0.00 |
| ATOM | 22465 | CG2  | VAL | 1500 | 84.342 | 56.125 | 38.922 | 0.00 | 0.00 |
| ATOM | 22466 | 1HG2 | VAL | 1500 | 84.232 | 55.849 | 37.873 | 0.00 | 0.00 |
| ATOM | 22467 | 2HG2 | VAL | 1500 | 83.451 | 55.962 | 39.528 | 0.00 | 0.00 |
| ATOM | 22468 | 3HG2 | VAL | 1500 | 84.470 | 57.178 | 39.170 | 0.00 | 0.00 |
| ATOM | 22469 | C    | VAL | 1500 | 86.421 | 52.962 | 39.979 | 0.00 | 0.00 |
| ATOM | 22470 | O    | VAL | 1500 | 86.275 | 52.860 | 41.234 | 0.00 | 0.00 |
| ATOM | 22471 | N    | HIE | 1501 | 87.485 | 52.430 | 39.374 | 0.00 | 0.00 |
| ATOM | 22472 | H    | HIE | 1501 | 87.710 | 52.805 | 38.463 | 0.00 | 0.00 |
| ATOM | 22473 | CA   | HIE | 1501 | 88.492 | 51.540 | 39.996 | 0.00 | 0.00 |
| ATOM | 22474 | HA   | HIE | 1501 | 89.067 | 51.032 | 39.222 | 0.00 | 0.00 |
| ATOM | 22475 | CB   | HIE | 1501 | 89.371 | 52.303 | 40.941 | 0.00 | 0.00 |
| ATOM | 22476 | HB2  | HIE | 1501 | 88.749 | 52.694 | 41.745 | 0.00 | 0.00 |
| ATOM | 22477 | HB3  | HIE | 1501 | 90.098 | 51.579 | 41.310 | 0.00 | 0.00 |
| ATOM | 22478 | CG   | HIE | 1501 | 90.113 | 53.495 | 40.346 | 0.00 | 0.00 |
| ATOM | 22479 | ND1  | HIE | 1501 | 90.903 | 53.442 | 39.137 | 0.00 | 0.00 |
| ATOM | 22480 | CE1  | HIE | 1501 | 91.245 | 54.733 | 38.831 | 0.00 | 0.00 |
| ATOM | 22481 | HE1  | HIE | 1501 | 91.770 | 55.003 | 37.927 | 0.00 | 0.00 |
| ATOM | 22482 | NE2  | HIE | 1501 | 90.801 | 55.516 | 39.813 | 0.00 | 0.00 |
| ATOM | 22483 | HE2  | HIE | 1501 | 90.904 | 56.521 | 39.827 | 0.00 | 0.00 |
| ATOM | 22484 | CD2  | HIE | 1501 | 90.113 | 54.814 | 40.781 | 0.00 | 0.00 |

|      |       |      |     |      |        |        |        |      |      |
|------|-------|------|-----|------|--------|--------|--------|------|------|
| ATOM | 22485 | HD2  | HIE | 1501 | 89.663 | 55.211 | 41.679 | 0.00 | 0.00 |
| ATOM | 22486 | C    | HIE | 1501 | 87.897 | 50.306 | 40.808 | 0.00 | 0.00 |
| ATOM | 22487 | O    | HIE | 1501 | 88.641 | 49.648 | 41.534 | 0.00 | 0.00 |
| ATOM | 22488 | N    | ASN | 1502 | 86.619 | 49.987 | 40.645 | 0.00 | 0.00 |
| ATOM | 22489 | H    | ASN | 1502 | 86.065 | 50.601 | 40.066 | 0.00 | 0.00 |
| ATOM | 22490 | CA   | ASN | 1502 | 85.924 | 48.876 | 41.283 | 0.00 | 0.00 |
| ATOM | 22491 | HA   | ASN | 1502 | 86.649 | 48.117 | 41.579 | 0.00 | 0.00 |
| ATOM | 22492 | CB   | ASN | 1502 | 85.237 | 49.443 | 42.495 | 0.00 | 0.00 |
| ATOM | 22493 | HB2  | ASN | 1502 | 84.690 | 50.288 | 42.076 | 0.00 | 0.00 |
| ATOM | 22494 | HB3  | ASN | 1502 | 84.577 | 48.672 | 42.891 | 0.00 | 0.00 |
| ATOM | 22495 | CG   | ASN | 1502 | 86.117 | 49.950 | 43.680 | 0.00 | 0.00 |
| ATOM | 22496 | OD1  | ASN | 1502 | 86.280 | 49.355 | 44.702 | 0.00 | 0.00 |
| ATOM | 22497 | ND2  | ASN | 1502 | 86.583 | 51.151 | 43.677 | 0.00 | 0.00 |
| ATOM | 22498 | 1HD2 | ASN | 1502 | 87.048 | 51.411 | 44.535 | 0.00 | 0.00 |
| ATOM | 22499 | 2HD2 | ASN | 1502 | 86.356 | 51.766 | 42.909 | 0.00 | 0.00 |
| ATOM | 22500 | C    | ASN | 1502 | 84.955 | 48.158 | 40.343 | 0.00 | 0.00 |
| ATOM | 22501 | O    | ASN | 1502 | 83.790 | 47.870 | 40.709 | 0.00 | 0.00 |
| ATOM | 22502 | N    | SER | 1503 | 85.362 | 48.101 | 39.144 | 0.00 | 0.00 |
| ATOM | 22503 | H    | SER | 1503 | 86.325 | 48.315 | 38.931 | 0.00 | 0.00 |
| ATOM | 22504 | CA   | SER | 1503 | 84.547 | 47.705 | 38.020 | 0.00 | 0.00 |
| ATOM | 22505 | HA   | SER | 1503 | 83.532 | 48.060 | 38.202 | 0.00 | 0.00 |
| ATOM | 22506 | CB   | SER | 1503 | 85.024 | 48.488 | 36.749 | 0.00 | 0.00 |
| ATOM | 22507 | HB2  | SER | 1503 | 84.449 | 48.110 | 35.904 | 0.00 | 0.00 |
| ATOM | 22508 | HB3  | SER | 1503 | 84.740 | 49.529 | 36.896 | 0.00 | 0.00 |
| ATOM | 22509 | OG   | SER | 1503 | 86.440 | 48.330 | 36.631 | 0.00 | 0.00 |
| ATOM | 22510 | HG   | SER | 1503 | 86.821 | 49.103 | 36.210 | 0.00 | 0.00 |

|      |       |      |     |      |        |        |        |      |      |
|------|-------|------|-----|------|--------|--------|--------|------|------|
| ATOM | 22511 | C    | SER | 1503 | 84.419 | 46.131 | 37.914 | 0.00 | 0.00 |
| ATOM | 22512 | O    | SER | 1503 | 83.466 | 45.717 | 37.173 | 0.00 | 0.00 |
| ATOM | 22513 | N    | LEU | 1504 | 85.354 | 45.379 | 38.486 | 0.00 | 0.00 |
| ATOM | 22514 | H    | LEU | 1504 | 86.084 | 45.874 | 38.979 | 0.00 | 0.00 |
| ATOM | 22515 | CA   | LEU | 1504 | 85.402 | 43.903 | 38.342 | 0.00 | 0.00 |
| ATOM | 22516 | HA   | LEU | 1504 | 85.778 | 43.700 | 37.339 | 0.00 | 0.00 |
| ATOM | 22517 | CB   | LEU | 1504 | 86.432 | 43.315 | 39.341 | 0.00 | 0.00 |
| ATOM | 22518 | HB2  | LEU | 1504 | 87.370 | 43.868 | 39.288 | 0.00 | 0.00 |
| ATOM | 22519 | HB3  | LEU | 1504 | 86.133 | 43.531 | 40.367 | 0.00 | 0.00 |
| ATOM | 22520 | CG   | LEU | 1504 | 86.813 | 41.817 | 39.131 | 0.00 | 0.00 |
| ATOM | 22521 | HG   | LEU | 1504 | 85.851 | 41.344 | 39.331 | 0.00 | 0.00 |
| ATOM | 22522 | CD1  | LEU | 1504 | 87.200 | 41.350 | 37.714 | 0.00 | 0.00 |
| ATOM | 22523 | 1HD1 | LEU | 1504 | 87.271 | 40.263 | 37.763 | 0.00 | 0.00 |
| ATOM | 22524 | 2HD1 | LEU | 1504 | 86.440 | 41.552 | 36.960 | 0.00 | 0.00 |
| ATOM | 22525 | 3HD1 | LEU | 1504 | 88.189 | 41.749 | 37.489 | 0.00 | 0.00 |
| ATOM | 22526 | CD2  | LEU | 1504 | 87.925 | 41.366 | 40.121 | 0.00 | 0.00 |
| ATOM | 22527 | 1HD2 | LEU | 1504 | 87.899 | 41.690 | 41.161 | 0.00 | 0.00 |
| ATOM | 22528 | 2HD2 | LEU | 1504 | 88.071 | 40.297 | 39.965 | 0.00 | 0.00 |
| ATOM | 22529 | 3HD2 | LEU | 1504 | 88.884 | 41.782 | 39.811 | 0.00 | 0.00 |
| ATOM | 22530 | C    | LEU | 1504 | 84.051 | 43.196 | 38.527 | 0.00 | 0.00 |
| ATOM | 22531 | O    | LEU | 1504 | 83.487 | 43.322 | 39.671 | 0.00 | 0.00 |
| ATOM | 22532 | N    | GLN | 1505 | 83.738 | 42.325 | 37.589 | 0.00 | 0.00 |
| ATOM | 22533 | H    | GLN | 1505 | 84.225 | 42.490 | 36.720 | 0.00 | 0.00 |
| ATOM | 22534 | CA   | GLN | 1505 | 82.711 | 41.265 | 37.650 | 0.00 | 0.00 |
| ATOM | 22535 | HA   | GLN | 1505 | 82.138 | 41.359 | 38.573 | 0.00 | 0.00 |
| ATOM | 22536 | CB   | GLN | 1505 | 81.768 | 41.432 | 36.400 | 0.00 | 0.00 |

|      |       |      |     |      |        |        |        |      |      |
|------|-------|------|-----|------|--------|--------|--------|------|------|
| ATOM | 22537 | HB2  | GLN | 1505 | 82.364 | 41.560 | 35.496 | 0.00 | 0.00 |
| ATOM | 22538 | HB3  | GLN | 1505 | 81.243 | 40.483 | 36.292 | 0.00 | 0.00 |
| ATOM | 22539 | CG   | GLN | 1505 | 80.784 | 42.635 | 36.554 | 0.00 | 0.00 |
| ATOM | 22540 | HG2  | GLN | 1505 | 79.932 | 42.368 | 37.179 | 0.00 | 0.00 |
| ATOM | 22541 | HG3  | GLN | 1505 | 81.341 | 43.500 | 36.914 | 0.00 | 0.00 |
| ATOM | 22542 | CD   | GLN | 1505 | 80.205 | 42.959 | 35.259 | 0.00 | 0.00 |
| ATOM | 22543 | OE1  | GLN | 1505 | 80.685 | 43.819 | 34.534 | 0.00 | 0.00 |
| ATOM | 22544 | NE2  | GLN | 1505 | 79.278 | 42.164 | 34.700 | 0.00 | 0.00 |
| ATOM | 22545 | 1HE2 | GLN | 1505 | 79.119 | 42.340 | 33.719 | 0.00 | 0.00 |
| ATOM | 22546 | 2HE2 | GLN | 1505 | 78.911 | 41.371 | 35.207 | 0.00 | 0.00 |
| ATOM | 22547 | C    | GLN | 1505 | 83.470 | 39.988 | 37.736 | 0.00 | 0.00 |
| ATOM | 22548 | O    | GLN | 1505 | 84.003 | 39.623 | 36.714 | 0.00 | 0.00 |
| ATOM | 22549 | N    | PRO | 1506 | 83.617 | 39.395 | 38.928 | 0.00 | 0.00 |
| ATOM | 22550 | CD   | PRO | 1506 | 83.068 | 39.857 | 40.240 | 0.00 | 0.00 |
| ATOM | 22551 | HD2  | PRO | 1506 | 83.089 | 40.945 | 40.305 | 0.00 | 0.00 |
| ATOM | 22552 | HD3  | PRO | 1506 | 81.991 | 39.749 | 40.111 | 0.00 | 0.00 |
| ATOM | 22553 | CG   | PRO | 1506 | 83.628 | 39.060 | 41.345 | 0.00 | 0.00 |
| ATOM | 22554 | HG2  | PRO | 1506 | 83.866 | 39.645 | 42.234 | 0.00 | 0.00 |
| ATOM | 22555 | HG3  | PRO | 1506 | 83.052 | 38.175 | 41.614 | 0.00 | 0.00 |
| ATOM | 22556 | CB   | PRO | 1506 | 84.964 | 38.641 | 40.729 | 0.00 | 0.00 |
| ATOM | 22557 | HB2  | PRO | 1506 | 85.642 | 39.475 | 40.914 | 0.00 | 0.00 |
| ATOM | 22558 | HB3  | PRO | 1506 | 85.472 | 37.774 | 41.151 | 0.00 | 0.00 |
| ATOM | 22559 | CA   | PRO | 1506 | 84.727 | 38.540 | 39.230 | 0.00 | 0.00 |
| ATOM | 22560 | HA   | PRO | 1506 | 85.590 | 38.827 | 38.630 | 0.00 | 0.00 |
| ATOM | 22561 | C    | PRO | 1506 | 84.294 | 37.039 | 38.851 | 0.00 | 0.00 |
| ATOM | 22562 | O    | PRO | 1506 | 83.072 | 36.691 | 38.985 | 0.00 | 0.00 |

|      |       |      |     |      |        |        |        |      |      |
|------|-------|------|-----|------|--------|--------|--------|------|------|
| ATOM | 22563 | N    | ASN | 1507 | 85.180 | 36.181 | 38.373 | 0.00 | 0.00 |
| ATOM | 22564 | H    | ASN | 1507 | 86.086 | 36.568 | 38.152 | 0.00 | 0.00 |
| ATOM | 22565 | CA   | ASN | 1507 | 84.874 | 34.714 | 38.228 | 0.00 | 0.00 |
| ATOM | 22566 | HA   | ASN | 1507 | 83.982 | 34.561 | 37.620 | 0.00 | 0.00 |
| ATOM | 22567 | CB   | ASN | 1507 | 86.016 | 34.102 | 37.375 | 0.00 | 0.00 |
| ATOM | 22568 | HB2  | ASN | 1507 | 86.162 | 34.602 | 36.417 | 0.00 | 0.00 |
| ATOM | 22569 | HB3  | ASN | 1507 | 87.000 | 34.241 | 37.821 | 0.00 | 0.00 |
| ATOM | 22570 | CG   | ASN | 1507 | 85.808 | 32.626 | 37.003 | 0.00 | 0.00 |
| ATOM | 22571 | OD1  | ASN | 1507 | 84.669 | 32.144 | 36.922 | 0.00 | 0.00 |
| ATOM | 22572 | ND2  | ASN | 1507 | 86.902 | 31.965 | 36.735 | 0.00 | 0.00 |
| ATOM | 22573 | 1HD2 | ASN | 1507 | 86.809 | 31.007 | 36.427 | 0.00 | 0.00 |
| ATOM | 22574 | 2HD2 | ASN | 1507 | 87.821 | 32.383 | 36.759 | 0.00 | 0.00 |
| ATOM | 22575 | C    | ASN | 1507 | 84.772 | 34.043 | 39.585 | 0.00 | 0.00 |
| ATOM | 22576 | O    | ASN | 1507 | 85.774 | 33.756 | 40.216 | 0.00 | 0.00 |
| ATOM | 22577 | N    | ILE | 1508 | 83.562 | 33.900 | 40.154 | 0.00 | 0.00 |
| ATOM | 22578 | H    | ILE | 1508 | 82.774 | 34.273 | 39.643 | 0.00 | 0.00 |
| ATOM | 22579 | CA   | ILE | 1508 | 83.241 | 33.720 | 41.625 | 0.00 | 0.00 |
| ATOM | 22580 | HA   | ILE | 1508 | 84.100 | 33.376 | 42.202 | 0.00 | 0.00 |
| ATOM | 22581 | CB   | ILE | 1508 | 82.845 | 35.125 | 42.210 | 0.00 | 0.00 |
| ATOM | 22582 | HB   | ILE | 1508 | 83.597 | 35.888 | 42.005 | 0.00 | 0.00 |
| ATOM | 22583 | CG2  | ILE | 1508 | 81.479 | 35.549 | 41.635 | 0.00 | 0.00 |
| ATOM | 22584 | 1HG2 | ILE | 1508 | 81.472 | 35.559 | 40.545 | 0.00 | 0.00 |
| ATOM | 22585 | 2HG2 | ILE | 1508 | 80.643 | 34.932 | 41.963 | 0.00 | 0.00 |
| ATOM | 22586 | 3HG2 | ILE | 1508 | 81.317 | 36.548 | 42.040 | 0.00 | 0.00 |
| ATOM | 22587 | CG1  | ILE | 1508 | 82.800 | 34.873 | 43.724 | 0.00 | 0.00 |
| ATOM | 22588 | 2HG1 | ILE | 1508 | 82.009 | 34.152 | 43.932 | 0.00 | 0.00 |



|      |       |      |     |      |        |        |        |      |      |
|------|-------|------|-----|------|--------|--------|--------|------|------|
| ATOM | 22589 | 3HG1 | ILE | 1508 | 83.660 | 34.378 | 44.176 | 0.00 | 0.00 |
| ATOM | 22590 | CD1  | ILE | 1508 | 82.559 | 36.148 | 44.633 | 0.00 | 0.00 |
| ATOM | 22591 | 1HD1 | ILE | 1508 | 83.467 | 36.738 | 44.507 | 0.00 | 0.00 |
| ATOM | 22592 | 2HD1 | ILE | 1508 | 81.730 | 36.758 | 44.276 | 0.00 | 0.00 |
| ATOM | 22593 | 3HD1 | ILE | 1508 | 82.468 | 35.902 | 45.691 | 0.00 | 0.00 |
| ATOM | 22594 | C    | ILE | 1508 | 82.228 | 32.591 | 41.964 | 0.00 | 0.00 |
| ATOM | 22595 | O    | ILE | 1508 | 81.120 | 32.493 | 41.453 | 0.00 | 0.00 |
| ATOM | 22596 | N    | THR | 1509 | 82.543 | 31.678 | 42.924 | 0.00 | 0.00 |
| ATOM | 22597 | H    | THR | 1509 | 83.448 | 31.732 | 43.370 | 0.00 | 0.00 |
| ATOM | 22598 | CA   | THR | 1509 | 81.579 | 30.638 | 43.449 | 0.00 | 0.00 |
| ATOM | 22599 | HA   | THR | 1509 | 80.639 | 31.157 | 43.260 | 0.00 | 0.00 |
| ATOM | 22600 | CB   | THR | 1509 | 81.671 | 29.334 | 42.620 | 0.00 | 0.00 |
| ATOM | 22601 | HB   | THR | 1509 | 81.587 | 29.473 | 41.543 | 0.00 | 0.00 |
| ATOM | 22602 | CG2  | THR | 1509 | 82.921 | 28.558 | 42.897 | 0.00 | 0.00 |
| ATOM | 22603 | 1HG2 | THR | 1509 | 83.790 | 29.174 | 42.666 | 0.00 | 0.00 |
| ATOM | 22604 | 2HG2 | THR | 1509 | 82.896 | 28.233 | 43.937 | 0.00 | 0.00 |
| ATOM | 22605 | 3HG2 | THR | 1509 | 82.932 | 27.677 | 42.254 | 0.00 | 0.00 |
| ATOM | 22606 | OG1  | THR | 1509 | 80.589 | 28.457 | 42.931 | 0.00 | 0.00 |
| ATOM | 22607 | HG1  | THR | 1509 | 80.396 | 27.986 | 42.117 | 0.00 | 0.00 |
| ATOM | 22608 | C    | THR | 1509 | 81.665 | 30.275 | 44.957 | 0.00 | 0.00 |
| ATOM | 22609 | O    | THR | 1509 | 82.638 | 30.560 | 45.584 | 0.00 | 0.00 |
| ATOM | 22610 | N    | VAL | 1510 | 80.587 | 29.582 | 45.512 | 0.00 | 0.00 |
| ATOM | 22611 | H    | VAL | 1510 | 79.940 | 29.139 | 44.876 | 0.00 | 0.00 |
| ATOM | 22612 | CA   | VAL | 1510 | 80.597 | 28.928 | 46.845 | 0.00 | 0.00 |
| ATOM | 22613 | HA   | VAL | 1510 | 81.607 | 28.679 | 47.173 | 0.00 | 0.00 |
| ATOM | 22614 | CB   | VAL | 1510 | 79.951 | 29.889 | 47.863 | 0.00 | 0.00 |

|      |       |      |     |      |        |        |        |      |      |
|------|-------|------|-----|------|--------|--------|--------|------|------|
| ATOM | 22615 | HB   | VAL | 1510 | 80.557 | 30.794 | 47.852 | 0.00 | 0.00 |
| ATOM | 22616 | CG1  | VAL | 1510 | 78.570 | 30.345 | 47.523 | 0.00 | 0.00 |
| ATOM | 22617 | 1HG1 | VAL | 1510 | 77.914 | 29.479 | 47.607 | 0.00 | 0.00 |
| ATOM | 22618 | 2HG1 | VAL | 1510 | 78.187 | 31.143 | 48.159 | 0.00 | 0.00 |
| ATOM | 22619 | 3HG1 | VAL | 1510 | 78.438 | 30.680 | 46.494 | 0.00 | 0.00 |
| ATOM | 22620 | CG2  | VAL | 1510 | 80.074 | 29.294 | 49.322 | 0.00 | 0.00 |
| ATOM | 22621 | 1HG2 | VAL | 1510 | 79.492 | 29.836 | 50.067 | 0.00 | 0.00 |
| ATOM | 22622 | 2HG2 | VAL | 1510 | 79.720 | 28.263 | 49.309 | 0.00 | 0.00 |
| ATOM | 22623 | 3HG2 | VAL | 1510 | 81.141 | 29.268 | 49.545 | 0.00 | 0.00 |
| ATOM | 22624 | C    | VAL | 1510 | 79.822 | 27.612 | 46.797 | 0.00 | 0.00 |
| ATOM | 22625 | O    | VAL | 1510 | 78.759 | 27.538 | 46.205 | 0.00 | 0.00 |
| ATOM | 22626 | N    | ASP | 1511 | 80.410 | 26.600 | 47.380 | 0.00 | 0.00 |
| ATOM | 22627 | H    | ASP | 1511 | 81.156 | 26.826 | 48.024 | 0.00 | 0.00 |
| ATOM | 22628 | CA   | ASP | 1511 | 79.868 | 25.281 | 47.484 | 0.00 | 0.00 |
| ATOM | 22629 | HA   | ASP | 1511 | 79.391 | 24.977 | 46.552 | 0.00 | 0.00 |
| ATOM | 22630 | CB   | ASP | 1511 | 81.081 | 24.395 | 47.829 | 0.00 | 0.00 |
| ATOM | 22631 | HB2  | ASP | 1511 | 81.800 | 24.475 | 47.013 | 0.00 | 0.00 |
| ATOM | 22632 | HB3  | ASP | 1511 | 81.567 | 24.737 | 48.743 | 0.00 | 0.00 |
| ATOM | 22633 | CG   | ASP | 1511 | 80.637 | 22.875 | 47.895 | 0.00 | 0.00 |
| ATOM | 22634 | OD1  | ASP | 1511 | 80.323 | 22.284 | 46.829 | 0.00 | 0.00 |
| ATOM | 22635 | OD2  | ASP | 1511 | 80.549 | 22.367 | 49.033 | 0.00 | 0.00 |
| ATOM | 22636 | C    | ASP | 1511 | 78.793 | 25.156 | 48.664 | 0.00 | 0.00 |
| ATOM | 22637 | O    | ASP | 1511 | 79.135 | 25.473 | 49.814 | 0.00 | 0.00 |
| ATOM | 22638 | N    | ALA | 1512 | 77.612 | 24.603 | 48.359 | 0.00 | 0.00 |
| ATOM | 22639 | H    | ALA | 1512 | 77.396 | 24.364 | 47.401 | 0.00 | 0.00 |
| ATOM | 22640 | CA   | ALA | 1512 | 76.499 | 24.455 | 49.329 | 0.00 | 0.00 |

|      |       |      |     |      |        |        |        |      |      |
|------|-------|------|-----|------|--------|--------|--------|------|------|
| ATOM | 22641 | HA   | ALA | 1512 | 76.507 | 25.302 | 50.015 | 0.00 | 0.00 |
| ATOM | 22642 | CB   | ALA | 1512 | 75.199 | 24.512 | 48.570 | 0.00 | 0.00 |
| ATOM | 22643 | HB1  | ALA | 1512 | 75.026 | 23.680 | 47.886 | 0.00 | 0.00 |
| ATOM | 22644 | HB2  | ALA | 1512 | 74.318 | 24.497 | 49.211 | 0.00 | 0.00 |
| ATOM | 22645 | HB3  | ALA | 1512 | 75.125 | 25.441 | 48.005 | 0.00 | 0.00 |
| ATOM | 22646 | C    | ALA | 1512 | 76.710 | 23.302 | 50.283 | 0.00 | 0.00 |
| ATOM | 22647 | O    | ALA | 1512 | 75.833 | 23.161 | 51.166 | 0.00 | 0.00 |
| ATOM | 22648 | N    | GLN | 1513 | 77.665 | 22.380 | 50.233 | 0.00 | 0.00 |
| ATOM | 22649 | H    | GLN | 1513 | 78.221 | 22.280 | 49.395 | 0.00 | 0.00 |
| ATOM | 22650 | CA   | GLN | 1513 | 77.772 | 21.193 | 51.090 | 0.00 | 0.00 |
| ATOM | 22651 | HA   | GLN | 1513 | 76.879 | 20.942 | 51.663 | 0.00 | 0.00 |
| ATOM | 22652 | CB   | GLN | 1513 | 78.071 | 20.000 | 50.167 | 0.00 | 0.00 |
| ATOM | 22653 | HB2  | GLN | 1513 | 78.791 | 20.245 | 49.386 | 0.00 | 0.00 |
| ATOM | 22654 | HB3  | GLN | 1513 | 78.616 | 19.326 | 50.829 | 0.00 | 0.00 |
| ATOM | 22655 | CG   | GLN | 1513 | 76.755 | 19.277 | 49.672 | 0.00 | 0.00 |
| ATOM | 22656 | HG2  | GLN | 1513 | 77.151 | 18.361 | 49.233 | 0.00 | 0.00 |
| ATOM | 22657 | HG3  | GLN | 1513 | 76.146 | 19.060 | 50.550 | 0.00 | 0.00 |
| ATOM | 22658 | CD   | GLN | 1513 | 75.845 | 20.027 | 48.661 | 0.00 | 0.00 |
| ATOM | 22659 | OE1  | GLN | 1513 | 76.202 | 20.921 | 47.890 | 0.00 | 0.00 |
| ATOM | 22660 | NE2  | GLN | 1513 | 74.591 | 19.700 | 48.646 | 0.00 | 0.00 |
| ATOM | 22661 | 1HE2 | GLN | 1513 | 73.908 | 19.988 | 47.960 | 0.00 | 0.00 |
| ATOM | 22662 | 2HE2 | GLN | 1513 | 74.269 | 19.012 | 49.311 | 0.00 | 0.00 |
| ATOM | 22663 | C    | GLN | 1513 | 78.895 | 21.394 | 52.058 | 0.00 | 0.00 |
| ATOM | 22664 | O    | GLN | 1513 | 78.841 | 20.872 | 53.172 | 0.00 | 0.00 |
| ATOM | 22665 | N    | THR | 1514 | 80.012 | 21.962 | 51.621 | 0.00 | 0.00 |
| ATOM | 22666 | H    | THR | 1514 | 80.030 | 22.162 | 50.631 | 0.00 | 0.00 |

|      |       |      |     |      |        |        |        |      |      |
|------|-------|------|-----|------|--------|--------|--------|------|------|
| ATOM | 22667 | CA   | THR | 1514 | 81.263 | 22.119 | 52.352 | 0.00 | 0.00 |
| ATOM | 22668 | HA   | THR | 1514 | 81.201 | 21.430 | 53.194 | 0.00 | 0.00 |
| ATOM | 22669 | CB   | THR | 1514 | 82.508 | 21.725 | 51.566 | 0.00 | 0.00 |
| ATOM | 22670 | HB   | THR | 1514 | 83.419 | 21.824 | 52.156 | 0.00 | 0.00 |
| ATOM | 22671 | CG2  | THR | 1514 | 82.445 | 20.270 | 50.987 | 0.00 | 0.00 |
| ATOM | 22672 | 1HG2 | THR | 1514 | 82.530 | 19.500 | 51.753 | 0.00 | 0.00 |
| ATOM | 22673 | 2HG2 | THR | 1514 | 81.496 | 20.179 | 50.459 | 0.00 | 0.00 |
| ATOM | 22674 | 3HG2 | THR | 1514 | 83.327 | 20.056 | 50.384 | 0.00 | 0.00 |
| ATOM | 22675 | OG1  | THR | 1514 | 82.709 | 22.627 | 50.520 | 0.00 | 0.00 |
| ATOM | 22676 | HG1  | THR | 1514 | 81.939 | 22.464 | 49.970 | 0.00 | 0.00 |
| ATOM | 22677 | C    | THR | 1514 | 81.467 | 23.519 | 52.821 | 0.00 | 0.00 |
| ATOM | 22678 | O    | THR | 1514 | 82.210 | 23.847 | 53.746 | 0.00 | 0.00 |
| ATOM | 22679 | N    | TYR | 1515 | 80.745 | 24.413 | 52.221 | 0.00 | 0.00 |
| ATOM | 22680 | H    | TYR | 1515 | 80.123 | 24.121 | 51.481 | 0.00 | 0.00 |
| ATOM | 22681 | CA   | TYR | 1515 | 80.820 | 25.865 | 52.541 | 0.00 | 0.00 |
| ATOM | 22682 | HA   | TYR | 1515 | 80.061 | 26.248 | 51.859 | 0.00 | 0.00 |
| ATOM | 22683 | CB   | TYR | 1515 | 80.235 | 26.216 | 53.910 | 0.00 | 0.00 |
| ATOM | 22684 | HB2  | TYR | 1515 | 80.999 | 26.178 | 54.687 | 0.00 | 0.00 |
| ATOM | 22685 | HB3  | TYR | 1515 | 79.844 | 27.223 | 53.762 | 0.00 | 0.00 |
| ATOM | 22686 | CG   | TYR | 1515 | 79.001 | 25.327 | 54.232 | 0.00 | 0.00 |
| ATOM | 22687 | CD1  | TYR | 1515 | 77.751 | 25.506 | 53.672 | 0.00 | 0.00 |
| ATOM | 22688 | HD1  | TYR | 1515 | 77.676 | 26.298 | 52.942 | 0.00 | 0.00 |
| ATOM | 22689 | CE1  | TYR | 1515 | 76.738 | 24.575 | 53.923 | 0.00 | 0.00 |
| ATOM | 22690 | HE1  | TYR | 1515 | 75.767 | 24.762 | 53.487 | 0.00 | 0.00 |
| ATOM | 22691 | CZ   | TYR | 1515 | 76.976 | 23.513 | 54.836 | 0.00 | 0.00 |
| ATOM | 22692 | OH   | TYR | 1515 | 75.925 | 22.743 | 55.230 | 0.00 | 0.00 |

|      |       |     |     |      |        |        |        |      |      |
|------|-------|-----|-----|------|--------|--------|--------|------|------|
| ATOM | 22693 | HH  | TYR | 1515 | 75.085 | 22.915 | 54.798 | 0.00 | 0.00 |
| ATOM | 22694 | CE2 | TYR | 1515 | 78.215 | 23.328 | 55.448 | 0.00 | 0.00 |
| ATOM | 22695 | HE2 | TYR | 1515 | 78.343 | 22.446 | 56.058 | 0.00 | 0.00 |
| ATOM | 22696 | CD2 | TYR | 1515 | 79.226 | 24.222 | 55.056 | 0.00 | 0.00 |
| ATOM | 22697 | HD2 | TYR | 1515 | 80.247 | 24.111 | 55.389 | 0.00 | 0.00 |
| ATOM | 22698 | C   | TYR | 1515 | 82.182 | 26.526 | 52.075 | 0.00 | 0.00 |
| ATOM | 22699 | O   | TYR | 1515 | 82.488 | 27.640 | 52.512 | 0.00 | 0.00 |
| ATOM | 22700 | N   | GLU | 1516 | 83.020 | 25.885 | 51.278 | 0.00 | 0.00 |
| ATOM | 22701 | H   | GLU | 1516 | 82.918 | 24.893 | 51.118 | 0.00 | 0.00 |
| ATOM | 22702 | CA  | GLU | 1516 | 84.189 | 26.501 | 50.588 | 0.00 | 0.00 |
| ATOM | 22703 | HA  | GLU | 1516 | 84.955 | 26.737 | 51.327 | 0.00 | 0.00 |
| ATOM | 22704 | CB  | GLU | 1516 | 84.832 | 25.326 | 49.803 | 0.00 | 0.00 |
| ATOM | 22705 | HB2 | GLU | 1516 | 84.920 | 24.453 | 50.449 | 0.00 | 0.00 |
| ATOM | 22706 | HB3 | GLU | 1516 | 84.166 | 25.017 | 48.998 | 0.00 | 0.00 |
| ATOM | 22707 | CG  | GLU | 1516 | 86.226 | 25.709 | 49.354 | 0.00 | 0.00 |
| ATOM | 22708 | HG2 | GLU | 1516 | 86.227 | 26.622 | 48.758 | 0.00 | 0.00 |
| ATOM | 22709 | HG3 | GLU | 1516 | 86.838 | 26.020 | 50.200 | 0.00 | 0.00 |
| ATOM | 22710 | CD  | GLU | 1516 | 86.752 | 24.579 | 48.422 | 0.00 | 0.00 |
| ATOM | 22711 | OE1 | GLU | 1516 | 86.155 | 24.320 | 47.375 | 0.00 | 0.00 |
| ATOM | 22712 | OE2 | GLU | 1516 | 87.809 | 24.000 | 48.700 | 0.00 | 0.00 |
| ATOM | 22713 | C   | GLU | 1516 | 83.881 | 27.640 | 49.514 | 0.00 | 0.00 |
| ATOM | 22714 | O   | GLU | 1516 | 83.007 | 27.353 | 48.685 | 0.00 | 0.00 |
| ATOM | 22715 | N   | VAL | 1517 | 84.468 | 28.799 | 49.546 | 0.00 | 0.00 |
| ATOM | 22716 | H   | VAL | 1517 | 85.283 | 28.812 | 50.143 | 0.00 | 0.00 |
| ATOM | 22717 | CA  | VAL | 1517 | 84.345 | 29.954 | 48.636 | 0.00 | 0.00 |
| ATOM | 22718 | HA  | VAL | 1517 | 83.413 | 29.868 | 48.078 | 0.00 | 0.00 |

|      |       |      |     |      |        |        |        |      |      |
|------|-------|------|-----|------|--------|--------|--------|------|------|
| ATOM | 22719 | CB   | VAL | 1517 | 84.335 | 31.288 | 49.405 | 0.00 | 0.00 |
| ATOM | 22720 | HB   | VAL | 1517 | 85.278 | 31.538 | 49.891 | 0.00 | 0.00 |
| ATOM | 22721 | CG1  | VAL | 1517 | 83.993 | 32.578 | 48.602 | 0.00 | 0.00 |
| ATOM | 22722 | 1HG1 | VAL | 1517 | 83.371 | 32.230 | 47.777 | 0.00 | 0.00 |
| ATOM | 22723 | 2HG1 | VAL | 1517 | 83.538 | 33.377 | 49.188 | 0.00 | 0.00 |
| ATOM | 22724 | 3HG1 | VAL | 1517 | 84.931 | 32.875 | 48.134 | 0.00 | 0.00 |
| ATOM | 22725 | CG2  | VAL | 1517 | 83.375 | 31.407 | 50.515 | 0.00 | 0.00 |
| ATOM | 22726 | 1HG2 | VAL | 1517 | 82.365 | 31.428 | 50.107 | 0.00 | 0.00 |
| ATOM | 22727 | 2HG2 | VAL | 1517 | 83.342 | 30.551 | 51.189 | 0.00 | 0.00 |
| ATOM | 22728 | 3HG2 | VAL | 1517 | 83.415 | 32.241 | 51.217 | 0.00 | 0.00 |
| ATOM | 22729 | C    | VAL | 1517 | 85.565 | 29.977 | 47.688 | 0.00 | 0.00 |
| ATOM | 22730 | O    | VAL | 1517 | 86.689 | 30.049 | 48.184 | 0.00 | 0.00 |
| ATOM | 22731 | N    | ARG | 1518 | 85.428 | 30.184 | 46.373 | 0.00 | 0.00 |
| ATOM | 22732 | H    | ARG | 1518 | 84.497 | 30.377 | 46.030 | 0.00 | 0.00 |
| ATOM | 22733 | CA   | ARG | 1518 | 86.560 | 30.423 | 45.440 | 0.00 | 0.00 |
| ATOM | 22734 | HA   | ARG | 1518 | 87.446 | 30.516 | 46.067 | 0.00 | 0.00 |
| ATOM | 22735 | CB   | ARG | 1518 | 86.831 | 29.075 | 44.688 | 0.00 | 0.00 |
| ATOM | 22736 | HB2  | ARG | 1518 | 85.835 | 28.788 | 44.349 | 0.00 | 0.00 |
| ATOM | 22737 | HB3  | ARG | 1518 | 87.528 | 29.162 | 43.854 | 0.00 | 0.00 |
| ATOM | 22738 | CG   | ARG | 1518 | 87.345 | 27.931 | 45.531 | 0.00 | 0.00 |
| ATOM | 22739 | HG2  | ARG | 1518 | 88.281 | 28.276 | 45.971 | 0.00 | 0.00 |
| ATOM | 22740 | HG3  | ARG | 1518 | 86.618 | 27.687 | 46.305 | 0.00 | 0.00 |
| ATOM | 22741 | CD   | ARG | 1518 | 87.529 | 26.693 | 44.769 | 0.00 | 0.00 |
| ATOM | 22742 | HD2  | ARG | 1518 | 86.548 | 26.421 | 44.379 | 0.00 | 0.00 |
| ATOM | 22743 | HD3  | ARG | 1518 | 88.177 | 26.771 | 43.895 | 0.00 | 0.00 |
| ATOM | 22744 | NE   | ARG | 1518 | 87.944 | 25.538 | 45.584 | 0.00 | 0.00 |

|      |       |      |     |      |        |        |        |      |      |
|------|-------|------|-----|------|--------|--------|--------|------|------|
| ATOM | 22745 | HE   | ARG | 1518 | 87.306 | 24.979 | 46.134 | 0.00 | 0.00 |
| ATOM | 22746 | CZ   | ARG | 1518 | 89.249 | 25.158 | 45.682 | 0.00 | 0.00 |
| ATOM | 22747 | NH1  | ARG | 1518 | 90.275 | 25.714 | 45.107 | 0.00 | 0.00 |
| ATOM | 22748 | 1HH1 | ARG | 1518 | 91.187 | 25.386 | 45.391 | 0.00 | 0.00 |
| ATOM | 22749 | 2HH1 | ARG | 1518 | 90.197 | 26.387 | 44.358 | 0.00 | 0.00 |
| ATOM | 22750 | NH2  | ARG | 1518 | 89.607 | 24.162 | 46.367 | 0.00 | 0.00 |
| ATOM | 22751 | 1HH2 | ARG | 1518 | 90.556 | 23.846 | 46.510 | 0.00 | 0.00 |
| ATOM | 22752 | 2HH2 | ARG | 1518 | 88.949 | 23.896 | 47.085 | 0.00 | 0.00 |
| ATOM | 22753 | C    | ARG | 1518 | 86.326 | 31.628 | 44.556 | 0.00 | 0.00 |
| ATOM | 22754 | O    | ARG | 1518 | 85.244 | 32.110 | 44.292 | 0.00 | 0.00 |
| ATOM | 22755 | N    | VAL | 1519 | 87.446 | 32.027 | 44.015 | 0.00 | 0.00 |
| ATOM | 22756 | H    | VAL | 1519 | 88.253 | 31.496 | 44.310 | 0.00 | 0.00 |
| ATOM | 22757 | CA   | VAL | 1519 | 87.712 | 33.068 | 42.958 | 0.00 | 0.00 |
| ATOM | 22758 | HA   | VAL | 1519 | 86.750 | 33.175 | 42.458 | 0.00 | 0.00 |
| ATOM | 22759 | CB   | VAL | 1519 | 88.145 | 34.490 | 43.535 | 0.00 | 0.00 |
| ATOM | 22760 | HB   | VAL | 1519 | 88.976 | 34.307 | 44.215 | 0.00 | 0.00 |
| ATOM | 22761 | CG1  | VAL | 1519 | 88.697 | 35.549 | 42.474 | 0.00 | 0.00 |
| ATOM | 22762 | 1HG1 | VAL | 1519 | 89.149 | 36.422 | 42.946 | 0.00 | 0.00 |
| ATOM | 22763 | 2HG1 | VAL | 1519 | 89.482 | 35.168 | 41.821 | 0.00 | 0.00 |
| ATOM | 22764 | 3HG1 | VAL | 1519 | 87.886 | 35.834 | 41.803 | 0.00 | 0.00 |
| ATOM | 22765 | CG2  | VAL | 1519 | 86.909 | 35.105 | 44.237 | 0.00 | 0.00 |
| ATOM | 22766 | 1HG2 | VAL | 1519 | 86.153 | 35.176 | 43.454 | 0.00 | 0.00 |
| ATOM | 22767 | 2HG2 | VAL | 1519 | 86.590 | 34.564 | 45.127 | 0.00 | 0.00 |
| ATOM | 22768 | 3HG2 | VAL | 1519 | 87.066 | 36.152 | 44.495 | 0.00 | 0.00 |
| ATOM | 22769 | C    | VAL | 1519 | 88.714 | 32.597 | 41.929 | 0.00 | 0.00 |
| ATOM | 22770 | O    | VAL | 1519 | 89.759 | 32.059 | 42.260 | 0.00 | 0.00 |

|      |       |     |     |      |        |        |        |      |      |
|------|-------|-----|-----|------|--------|--------|--------|------|------|
| ATOM | 22771 | N   | ASP | 1520 | 88.497 | 32.653 | 40.648 | 0.00 | 0.00 |
| ATOM | 22772 | H   | ASP | 1520 | 87.585 | 32.980 | 40.362 | 0.00 | 0.00 |
| ATOM | 22773 | CA  | ASP | 1520 | 89.236 | 31.908 | 39.641 | 0.00 | 0.00 |
| ATOM | 22774 | HA  | ASP | 1520 | 88.682 | 32.085 | 38.719 | 0.00 | 0.00 |
| ATOM | 22775 | CB  | ASP | 1520 | 90.557 | 32.694 | 39.297 | 0.00 | 0.00 |
| ATOM | 22776 | HB2 | ASP | 1520 | 90.402 | 33.769 | 39.393 | 0.00 | 0.00 |
| ATOM | 22777 | HB3 | ASP | 1520 | 91.284 | 32.398 | 40.054 | 0.00 | 0.00 |
| ATOM | 22778 | CG  | ASP | 1520 | 90.945 | 32.358 | 37.870 | 0.00 | 0.00 |
| ATOM | 22779 | OD1 | ASP | 1520 | 92.141 | 31.997 | 37.650 | 0.00 | 0.00 |
| ATOM | 22780 | OD2 | ASP | 1520 | 90.116 | 32.465 | 36.985 | 0.00 | 0.00 |
| ATOM | 22781 | C   | ASP | 1520 | 89.444 | 30.324 | 39.891 | 0.00 | 0.00 |
| ATOM | 22782 | O   | ASP | 1520 | 90.373 | 29.713 | 39.458 | 0.00 | 0.00 |
| ATOM | 22783 | N   | GLY | 1521 | 88.554 | 29.752 | 40.781 | 0.00 | 0.00 |
| ATOM | 22784 | H   | GLY | 1521 | 87.692 | 30.197 | 41.061 | 0.00 | 0.00 |
| ATOM | 22785 | CA  | GLY | 1521 | 88.727 | 28.359 | 41.231 | 0.00 | 0.00 |
| ATOM | 22786 | HA2 | GLY | 1521 | 87.727 | 27.998 | 41.472 | 0.00 | 0.00 |
| ATOM | 22787 | HA3 | GLY | 1521 | 89.025 | 27.823 | 40.330 | 0.00 | 0.00 |
| ATOM | 22788 | C   | GLY | 1521 | 89.709 | 28.109 | 42.333 | 0.00 | 0.00 |
| ATOM | 22789 | O   | GLY | 1521 | 90.119 | 27.047 | 42.682 | 0.00 | 0.00 |
| ATOM | 22790 | N   | GLU | 1522 | 90.193 | 29.197 | 42.971 | 0.00 | 0.00 |
| ATOM | 22791 | H   | GLU | 1522 | 89.881 | 30.038 | 42.506 | 0.00 | 0.00 |
| ATOM | 22792 | CA  | GLU | 1522 | 91.419 | 29.194 | 43.904 | 0.00 | 0.00 |
| ATOM | 22793 | HA  | GLU | 1522 | 91.617 | 28.159 | 44.181 | 0.00 | 0.00 |
| ATOM | 22794 | CB  | GLU | 1522 | 92.675 | 29.881 | 43.323 | 0.00 | 0.00 |
| ATOM | 22795 | HB2 | GLU | 1522 | 93.074 | 29.444 | 42.408 | 0.00 | 0.00 |
| ATOM | 22796 | HB3 | GLU | 1522 | 92.565 | 30.933 | 43.063 | 0.00 | 0.00 |



|      |       |      |     |      |        |        |        |      |      |
|------|-------|------|-----|------|--------|--------|--------|------|------|
| ATOM | 22797 | CG   | GLU | 1522 | 93.864 | 29.787 | 44.227 | 0.00 | 0.00 |
| ATOM | 22798 | HG2  | GLU | 1522 | 94.710 | 30.163 | 43.651 | 0.00 | 0.00 |
| ATOM | 22799 | HG3  | GLU | 1522 | 93.727 | 30.340 | 45.156 | 0.00 | 0.00 |
| ATOM | 22800 | CD   | GLU | 1522 | 94.075 | 28.284 | 44.548 | 0.00 | 0.00 |
| ATOM | 22801 | OE1  | GLU | 1522 | 94.709 | 27.554 | 43.726 | 0.00 | 0.00 |
| ATOM | 22802 | OE2  | GLU | 1522 | 93.567 | 27.796 | 45.568 | 0.00 | 0.00 |
| ATOM | 22803 | C    | GLU | 1522 | 90.904 | 29.792 | 45.249 | 0.00 | 0.00 |
| ATOM | 22804 | O    | GLU | 1522 | 90.034 | 30.661 | 45.206 | 0.00 | 0.00 |
| ATOM | 22805 | N    | LEU | 1523 | 91.587 | 29.474 | 46.445 | 0.00 | 0.00 |
| ATOM | 22806 | H    | LEU | 1523 | 92.348 | 28.812 | 46.392 | 0.00 | 0.00 |
| ATOM | 22807 | CA   | LEU | 1523 | 91.116 | 29.996 | 47.693 | 0.00 | 0.00 |
| ATOM | 22808 | HA   | LEU | 1523 | 90.032 | 29.897 | 47.750 | 0.00 | 0.00 |
| ATOM | 22809 | CB   | LEU | 1523 | 91.657 | 29.163 | 48.870 | 0.00 | 0.00 |
| ATOM | 22810 | HB2  | LEU | 1523 | 92.724 | 29.004 | 48.718 | 0.00 | 0.00 |
| ATOM | 22811 | HB3  | LEU | 1523 | 91.382 | 29.806 | 49.707 | 0.00 | 0.00 |
| ATOM | 22812 | CG   | LEU | 1523 | 90.965 | 27.806 | 48.884 | 0.00 | 0.00 |
| ATOM | 22813 | HG   | LEU | 1523 | 91.051 | 27.321 | 47.911 | 0.00 | 0.00 |
| ATOM | 22814 | CD1  | LEU | 1523 | 91.738 | 26.828 | 49.824 | 0.00 | 0.00 |
| ATOM | 22815 | 1HD1 | LEU | 1523 | 91.468 | 27.123 | 50.838 | 0.00 | 0.00 |
| ATOM | 22816 | 2HD1 | LEU | 1523 | 91.318 | 25.824 | 49.760 | 0.00 | 0.00 |
| ATOM | 22817 | 3HD1 | LEU | 1523 | 92.812 | 26.846 | 49.640 | 0.00 | 0.00 |
| ATOM | 22818 | CD2  | LEU | 1523 | 89.481 | 27.799 | 49.294 | 0.00 | 0.00 |
| ATOM | 22819 | 1HD2 | LEU | 1523 | 88.935 | 28.243 | 48.462 | 0.00 | 0.00 |
| ATOM | 22820 | 2HD2 | LEU | 1523 | 89.105 | 26.780 | 49.388 | 0.00 | 0.00 |
| ATOM | 22821 | 3HD2 | LEU | 1523 | 89.526 | 28.423 | 50.186 | 0.00 | 0.00 |
| ATOM | 22822 | C    | LEU | 1523 | 91.538 | 31.449 | 47.822 | 0.00 | 0.00 |

|      |       |      |     |      |        |        |        |      |      |
|------|-------|------|-----|------|--------|--------|--------|------|------|
| ATOM | 22823 | O    | LEU | 1523 | 92.566 | 31.863 | 47.259 | 0.00 | 0.00 |
| ATOM | 22824 | N    | ILE | 1524 | 90.726 | 32.244 | 48.523 | 0.00 | 0.00 |
| ATOM | 22825 | H    | ILE | 1524 | 90.007 | 31.794 | 49.071 | 0.00 | 0.00 |
| ATOM | 22826 | CA   | ILE | 1524 | 90.736 | 33.702 | 48.433 | 0.00 | 0.00 |
| ATOM | 22827 | HA   | ILE | 1524 | 91.755 | 33.970 | 48.154 | 0.00 | 0.00 |
| ATOM | 22828 | CB   | ILE | 1524 | 89.673 | 34.161 | 47.389 | 0.00 | 0.00 |
| ATOM | 22829 | HB   | ILE | 1524 | 89.881 | 33.697 | 46.425 | 0.00 | 0.00 |
| ATOM | 22830 | CG2  | ILE | 1524 | 88.258 | 33.825 | 47.751 | 0.00 | 0.00 |
| ATOM | 22831 | 1HG2 | ILE | 1524 | 87.591 | 33.940 | 46.897 | 0.00 | 0.00 |
| ATOM | 22832 | 2HG2 | ILE | 1524 | 88.215 | 32.764 | 47.999 | 0.00 | 0.00 |
| ATOM | 22833 | 3HG2 | ILE | 1524 | 87.966 | 34.424 | 48.613 | 0.00 | 0.00 |
| ATOM | 22834 | CG1  | ILE | 1524 | 89.637 | 35.617 | 47.074 | 0.00 | 0.00 |
| ATOM | 22835 | 2HG1 | ILE | 1524 | 88.895 | 35.803 | 46.297 | 0.00 | 0.00 |
| ATOM | 22836 | 3HG1 | ILE | 1524 | 89.441 | 36.130 | 48.015 | 0.00 | 0.00 |
| ATOM | 22837 | CD1  | ILE | 1524 | 91.007 | 36.223 | 46.639 | 0.00 | 0.00 |
| ATOM | 22838 | 1HD1 | ILE | 1524 | 91.583 | 35.498 | 46.063 | 0.00 | 0.00 |
| ATOM | 22839 | 2HD1 | ILE | 1524 | 90.689 | 37.101 | 46.078 | 0.00 | 0.00 |
| ATOM | 22840 | 3HD1 | ILE | 1524 | 91.503 | 36.496 | 47.571 | 0.00 | 0.00 |
| ATOM | 22841 | C    | ILE | 1524 | 90.527 | 34.339 | 49.822 | 0.00 | 0.00 |
| ATOM | 22842 | O    | ILE | 1524 | 91.174 | 35.368 | 50.038 | 0.00 | 0.00 |
| ATOM | 22843 | N    | THR | 1525 | 89.633 | 33.881 | 50.624 | 0.00 | 0.00 |
| ATOM | 22844 | H    | THR | 1525 | 89.275 | 32.944 | 50.505 | 0.00 | 0.00 |
| ATOM | 22845 | CA   | THR | 1525 | 89.125 | 34.424 | 51.932 | 0.00 | 0.00 |
| ATOM | 22846 | HA   | THR | 1525 | 88.614 | 35.364 | 51.723 | 0.00 | 0.00 |
| ATOM | 22847 | CB   | THR | 1525 | 88.121 | 33.576 | 52.648 | 0.00 | 0.00 |
| ATOM | 22848 | HB   | THR | 1525 | 87.957 | 33.843 | 53.692 | 0.00 | 0.00 |

|      |       |      |     |      |        |        |        |      |      |
|------|-------|------|-----|------|--------|--------|--------|------|------|
| ATOM | 22849 | CG2  | THR | 1525 | 86.812 | 33.649 | 51.888 | 0.00 | 0.00 |
| ATOM | 22850 | 1HG2 | THR | 1525 | 86.153 | 32.918 | 52.356 | 0.00 | 0.00 |
| ATOM | 22851 | 2HG2 | THR | 1525 | 86.460 | 34.679 | 51.852 | 0.00 | 0.00 |
| ATOM | 22852 | 3HG2 | THR | 1525 | 86.887 | 33.281 | 50.864 | 0.00 | 0.00 |
| ATOM | 22853 | OG1  | THR | 1525 | 88.527 | 32.223 | 52.753 | 0.00 | 0.00 |
| ATOM | 22854 | HG1  | THR | 1525 | 87.792 | 31.814 | 53.215 | 0.00 | 0.00 |
| ATOM | 22855 | C    | THR | 1525 | 90.208 | 34.705 | 52.974 | 0.00 | 0.00 |
| ATOM | 22856 | O    | THR | 1525 | 91.164 | 34.004 | 53.146 | 0.00 | 0.00 |
| ATOM | 22857 | N    | SER | 1526 | 90.053 | 35.861 | 53.607 | 0.00 | 0.00 |
| ATOM | 22858 | H    | SER | 1526 | 89.168 | 36.335 | 53.498 | 0.00 | 0.00 |
| ATOM | 22859 | CA   | SER | 1526 | 90.842 | 36.440 | 54.660 | 0.00 | 0.00 |
| ATOM | 22860 | HA   | SER | 1526 | 91.866 | 36.489 | 54.291 | 0.00 | 0.00 |
| ATOM | 22861 | CB   | SER | 1526 | 90.414 | 37.865 | 54.982 | 0.00 | 0.00 |
| ATOM | 22862 | HB2  | SER | 1526 | 89.481 | 37.791 | 55.539 | 0.00 | 0.00 |
| ATOM | 22863 | HB3  | SER | 1526 | 91.162 | 38.326 | 55.628 | 0.00 | 0.00 |
| ATOM | 22864 | OG   | SER | 1526 | 90.347 | 38.601 | 53.773 | 0.00 | 0.00 |
| ATOM | 22865 | HG   | SER | 1526 | 89.686 | 39.262 | 53.992 | 0.00 | 0.00 |
| ATOM | 22866 | C    | SER | 1526 | 90.899 | 35.605 | 55.917 | 0.00 | 0.00 |
| ATOM | 22867 | O    | SER | 1526 | 89.974 | 34.893 | 56.322 | 0.00 | 0.00 |
| ATOM | 22868 | N    | GLU | 1527 | 92.060 | 35.689 | 56.643 | 0.00 | 0.00 |
| ATOM | 22869 | H    | GLU | 1527 | 92.849 | 36.244 | 56.343 | 0.00 | 0.00 |
| ATOM | 22870 | CA   | GLU | 1527 | 92.164 | 35.186 | 58.040 | 0.00 | 0.00 |
| ATOM | 22871 | HA   | GLU | 1527 | 91.649 | 34.225 | 58.056 | 0.00 | 0.00 |
| ATOM | 22872 | CB   | GLU | 1527 | 93.695 | 34.982 | 58.191 | 0.00 | 0.00 |
| ATOM | 22873 | HB2  | GLU | 1527 | 93.796 | 34.415 | 59.117 | 0.00 | 0.00 |
| ATOM | 22874 | HB3  | GLU | 1527 | 94.135 | 34.272 | 57.490 | 0.00 | 0.00 |

|      |       |     |     |      |        |        |        |      |      |
|------|-------|-----|-----|------|--------|--------|--------|------|------|
| ATOM | 22875 | CG  | GLU | 1527 | 94.449 | 36.305 | 58.270 | 0.00 | 0.00 |
| ATOM | 22876 | HG2 | GLU | 1527 | 94.417 | 36.849 | 57.327 | 0.00 | 0.00 |
| ATOM | 22877 | HG3 | GLU | 1527 | 94.177 | 36.918 | 59.129 | 0.00 | 0.00 |
| ATOM | 22878 | CD  | GLU | 1527 | 95.924 | 35.904 | 58.508 | 0.00 | 0.00 |
| ATOM | 22879 | OE1 | GLU | 1527 | 96.573 | 35.293 | 57.635 | 0.00 | 0.00 |
| ATOM | 22880 | OE2 | GLU | 1527 | 96.507 | 36.265 | 59.563 | 0.00 | 0.00 |
| ATOM | 22881 | C   | GLU | 1527 | 91.530 | 36.114 | 59.146 | 0.00 | 0.00 |
| ATOM | 22882 | O   | GLU | 1527 | 91.437 | 37.355 | 58.981 | 0.00 | 0.00 |
| ATOM | 22883 | N   | PRO | 1528 | 91.226 | 35.620 | 60.322 | 0.00 | 0.00 |
| ATOM | 22884 | CD  | PRO | 1528 | 91.361 | 34.265 | 60.753 | 0.00 | 0.00 |
| ATOM | 22885 | HD2 | PRO | 1528 | 91.084 | 33.466 | 60.065 | 0.00 | 0.00 |
| ATOM | 22886 | HD3 | PRO | 1528 | 92.406 | 34.204 | 61.056 | 0.00 | 0.00 |
| ATOM | 22887 | CG  | PRO | 1528 | 90.565 | 34.068 | 62.091 | 0.00 | 0.00 |
| ATOM | 22888 | HG2 | PRO | 1528 | 89.570 | 33.716 | 61.819 | 0.00 | 0.00 |
| ATOM | 22889 | HG3 | PRO | 1528 | 91.064 | 33.389 | 62.782 | 0.00 | 0.00 |
| ATOM | 22890 | CB  | PRO | 1528 | 90.597 | 35.521 | 62.609 | 0.00 | 0.00 |
| ATOM | 22891 | HB2 | PRO | 1528 | 89.695 | 35.860 | 63.118 | 0.00 | 0.00 |
| ATOM | 22892 | HB3 | PRO | 1528 | 91.425 | 35.448 | 63.315 | 0.00 | 0.00 |
| ATOM | 22893 | CA  | PRO | 1528 | 90.820 | 36.471 | 61.448 | 0.00 | 0.00 |
| ATOM | 22894 | HA  | PRO | 1528 | 89.947 | 37.052 | 61.151 | 0.00 | 0.00 |
| ATOM | 22895 | C   | PRO | 1528 | 91.899 | 37.481 | 61.733 | 0.00 | 0.00 |
| ATOM | 22896 | O   | PRO | 1528 | 93.023 | 37.244 | 62.079 | 0.00 | 0.00 |
| ATOM | 22897 | N   | ALA | 1529 | 91.548 | 38.780 | 61.719 | 0.00 | 0.00 |
| ATOM | 22898 | H   | ALA | 1529 | 90.659 | 39.003 | 61.295 | 0.00 | 0.00 |
| ATOM | 22899 | CA  | ALA | 1529 | 92.491 | 39.846 | 62.061 | 0.00 | 0.00 |
| ATOM | 22900 | HA  | ALA | 1529 | 93.433 | 39.605 | 61.568 | 0.00 | 0.00 |

|      |       |      |     |      |        |        |        |      |      |
|------|-------|------|-----|------|--------|--------|--------|------|------|
| ATOM | 22901 | CB   | ALA | 1529 | 92.054 | 41.207 | 61.346 | 0.00 | 0.00 |
| ATOM | 22902 | HB1  | ALA | 1529 | 91.365 | 41.747 | 61.996 | 0.00 | 0.00 |
| ATOM | 22903 | HB2  | ALA | 1529 | 92.996 | 41.668 | 61.048 | 0.00 | 0.00 |
| ATOM | 22904 | HB3  | ALA | 1529 | 91.446 | 41.081 | 60.450 | 0.00 | 0.00 |
| ATOM | 22905 | C    | ALA | 1529 | 92.770 | 40.069 | 63.559 | 0.00 | 0.00 |
| ATOM | 22906 | O    | ALA | 1529 | 91.793 | 39.951 | 64.376 | 0.00 | 0.00 |
| ATOM | 22907 | N    | ASP | 1530 | 94.036 | 40.423 | 63.925 | 0.00 | 0.00 |
| ATOM | 22908 | H    | ASP | 1530 | 94.672 | 40.477 | 63.142 | 0.00 | 0.00 |
| ATOM | 22909 | CA   | ASP | 1530 | 94.552 | 40.364 | 65.267 | 0.00 | 0.00 |
| ATOM | 22910 | HA   | ASP | 1530 | 93.709 | 40.137 | 65.920 | 0.00 | 0.00 |
| ATOM | 22911 | CB   | ASP | 1530 | 95.486 | 39.179 | 65.358 | 0.00 | 0.00 |
| ATOM | 22912 | HB2  | ASP | 1530 | 94.985 | 38.320 | 64.912 | 0.00 | 0.00 |
| ATOM | 22913 | HB3  | ASP | 1530 | 96.372 | 39.363 | 64.751 | 0.00 | 0.00 |
| ATOM | 22914 | CG   | ASP | 1530 | 95.823 | 38.833 | 66.788 | 0.00 | 0.00 |
| ATOM | 22915 | OD1  | ASP | 1530 | 95.012 | 38.995 | 67.768 | 0.00 | 0.00 |
| ATOM | 22916 | OD2  | ASP | 1530 | 96.933 | 38.301 | 66.987 | 0.00 | 0.00 |
| ATOM | 22917 | C    | ASP | 1530 | 95.279 | 41.656 | 65.655 | 0.00 | 0.00 |
| ATOM | 22918 | O    | ASP | 1530 | 94.913 | 42.195 | 66.660 | 0.00 | 0.00 |
| ATOM | 22919 | N    | VAL | 1531 | 96.202 | 42.127 | 64.842 | 0.00 | 0.00 |
| ATOM | 22920 | H    | VAL | 1531 | 96.352 | 41.633 | 63.973 | 0.00 | 0.00 |
| ATOM | 22921 | CA   | VAL | 1531 | 96.865 | 43.386 | 65.081 | 0.00 | 0.00 |
| ATOM | 22922 | HA   | VAL | 1531 | 96.314 | 43.869 | 65.888 | 0.00 | 0.00 |
| ATOM | 22923 | CB   | VAL | 1531 | 98.358 | 43.277 | 65.358 | 0.00 | 0.00 |
| ATOM | 22924 | HB   | VAL | 1531 | 98.865 | 44.240 | 65.422 | 0.00 | 0.00 |
| ATOM | 22925 | CG1  | VAL | 1531 | 98.691 | 42.427 | 66.603 | 0.00 | 0.00 |
| ATOM | 22926 | 1HG1 | VAL | 1531 | 98.209 | 41.450 | 66.597 | 0.00 | 0.00 |

|      |       |      |     |      |         |        |        |      |      |
|------|-------|------|-----|------|---------|--------|--------|------|------|
| ATOM | 22927 | 2HG1 | VAL | 1531 | 99.747  | 42.211 | 66.767 | 0.00 | 0.00 |
| ATOM | 22928 | 3HG1 | VAL | 1531 | 98.354  | 42.996 | 67.469 | 0.00 | 0.00 |
| ATOM | 22929 | CG2  | VAL | 1531 | 98.994  | 42.562 | 64.166 | 0.00 | 0.00 |
| ATOM | 22930 | 1HG2 | VAL | 1531 | 100.074 | 42.462 | 64.271 | 0.00 | 0.00 |
| ATOM | 22931 | 2HG2 | VAL | 1531 | 98.527  | 41.581 | 64.076 | 0.00 | 0.00 |
| ATOM | 22932 | 3HG2 | VAL | 1531 | 98.763  | 43.087 | 63.239 | 0.00 | 0.00 |
| ATOM | 22933 | C    | VAL | 1531 | 96.605  | 44.358 | 63.925 | 0.00 | 0.00 |
| ATOM | 22934 | O    | VAL | 1531 | 96.665  | 43.969 | 62.728 | 0.00 | 0.00 |
| ATOM | 22935 | N    | LEU | 1532 | 96.250  | 45.557 | 64.243 | 0.00 | 0.00 |
| ATOM | 22936 | H    | LEU | 1532 | 96.140  | 45.734 | 65.231 | 0.00 | 0.00 |
| ATOM | 22937 | CA   | LEU | 1532 | 96.063  | 46.751 | 63.341 | 0.00 | 0.00 |
| ATOM | 22938 | HA   | LEU | 1532 | 96.696  | 46.500 | 62.490 | 0.00 | 0.00 |
| ATOM | 22939 | CB   | LEU | 1532 | 94.555  | 46.731 | 62.946 | 0.00 | 0.00 |
| ATOM | 22940 | HB2  | LEU | 1532 | 93.934  | 46.650 | 63.838 | 0.00 | 0.00 |
| ATOM | 22941 | HB3  | LEU | 1532 | 94.266  | 47.688 | 62.510 | 0.00 | 0.00 |
| ATOM | 22942 | CG   | LEU | 1532 | 94.044  | 45.584 | 61.997 | 0.00 | 0.00 |
| ATOM | 22943 | HG   | LEU | 1532 | 94.247  | 44.617 | 62.457 | 0.00 | 0.00 |
| ATOM | 22944 | CD1  | LEU | 1532 | 92.544  | 45.621 | 61.702 | 0.00 | 0.00 |
| ATOM | 22945 | 1HD1 | LEU | 1532 | 92.267  | 44.628 | 61.348 | 0.00 | 0.00 |
| ATOM | 22946 | 2HD1 | LEU | 1532 | 92.045  | 45.970 | 62.606 | 0.00 | 0.00 |
| ATOM | 22947 | 3HD1 | LEU | 1532 | 92.333  | 46.367 | 60.937 | 0.00 | 0.00 |
| ATOM | 22948 | CD2  | LEU | 1532 | 94.744  | 45.748 | 60.684 | 0.00 | 0.00 |
| ATOM | 22949 | 1HD2 | LEU | 1532 | 95.776  | 45.417 | 60.799 | 0.00 | 0.00 |
| ATOM | 22950 | 2HD2 | LEU | 1532 | 94.246  | 45.137 | 59.931 | 0.00 | 0.00 |
| ATOM | 22951 | 3HD2 | LEU | 1532 | 94.727  | 46.773 | 60.314 | 0.00 | 0.00 |
| ATOM | 22952 | C    | LEU | 1532 | 96.592  | 48.000 | 63.967 | 0.00 | 0.00 |

|      |       |     |     |      |        |        |        |      |      |
|------|-------|-----|-----|------|--------|--------|--------|------|------|
| ATOM | 22953 | O   | LEU | 1532 | 96.781 | 47.986 | 65.213 | 0.00 | 0.00 |
| ATOM | 22954 | N   | PRO | 1533 | 96.830 | 49.038 | 63.167 | 0.00 | 0.00 |
| ATOM | 22955 | CD  | PRO | 1533 | 96.670 | 49.028 | 61.663 | 0.00 | 0.00 |
| ATOM | 22956 | HD2 | PRO | 1533 | 95.692 | 49.015 | 61.181 | 0.00 | 0.00 |
| ATOM | 22957 | HD3 | PRO | 1533 | 97.280 | 48.224 | 61.250 | 0.00 | 0.00 |
| ATOM | 22958 | CG  | PRO | 1533 | 97.357 | 50.285 | 61.107 | 0.00 | 0.00 |
| ATOM | 22959 | HG2 | PRO | 1533 | 98.009 | 50.002 | 60.281 | 0.00 | 0.00 |
| ATOM | 22960 | HG3 | PRO | 1533 | 96.541 | 50.990 | 60.950 | 0.00 | 0.00 |
| ATOM | 22961 | CB  | PRO | 1533 | 98.211 | 50.703 | 62.241 | 0.00 | 0.00 |
| ATOM | 22962 | HB2 | PRO | 1533 | 99.064 | 50.043 | 62.078 | 0.00 | 0.00 |
| ATOM | 22963 | HB3 | PRO | 1533 | 98.427 | 51.765 | 62.132 | 0.00 | 0.00 |
| ATOM | 22964 | CA  | PRO | 1533 | 97.417 | 50.260 | 63.496 | 0.00 | 0.00 |
| ATOM | 22965 | HA  | PRO | 1533 | 98.196 | 50.044 | 64.227 | 0.00 | 0.00 |
| ATOM | 22966 | C   | PRO | 1533 | 96.471 | 51.289 | 63.951 | 0.00 | 0.00 |
| ATOM | 22967 | O   | PRO | 1533 | 95.267 | 51.088 | 63.958 | 0.00 | 0.00 |
| ATOM | 22968 | N   | MET | 1534 | 97.019 | 52.418 | 64.361 | 0.00 | 0.00 |
| ATOM | 22969 | H   | MET | 1534 | 98.029 | 52.429 | 64.349 | 0.00 | 0.00 |
| ATOM | 22970 | CA  | MET | 1534 | 96.379 | 53.665 | 64.753 | 0.00 | 0.00 |
| ATOM | 22971 | HA  | MET | 1534 | 97.199 | 54.058 | 65.354 | 0.00 | 0.00 |
| ATOM | 22972 | CB  | MET | 1534 | 96.036 | 54.668 | 63.653 | 0.00 | 0.00 |
| ATOM | 22973 | HB2 | MET | 1534 | 95.526 | 55.488 | 64.159 | 0.00 | 0.00 |
| ATOM | 22974 | HB3 | MET | 1534 | 96.949 | 55.051 | 63.197 | 0.00 | 0.00 |
| ATOM | 22975 | CG  | MET | 1534 | 95.165 | 54.088 | 62.559 | 0.00 | 0.00 |
| ATOM | 22976 | HG2 | MET | 1534 | 95.645 | 53.232 | 62.086 | 0.00 | 0.00 |
| ATOM | 22977 | HG3 | MET | 1534 | 94.228 | 53.733 | 62.990 | 0.00 | 0.00 |
| ATOM | 22978 | SD  | MET | 1534 | 94.847 | 55.299 | 61.295 | 0.00 | 0.00 |

|      |       |     |     |      |        |        |        |      |      |
|------|-------|-----|-----|------|--------|--------|--------|------|------|
| ATOM | 22979 | CE  | MET | 1534 | 93.788 | 54.332 | 59.985 | 0.00 | 0.00 |
| ATOM | 22980 | HE1 | MET | 1534 | 93.098 | 53.785 | 60.628 | 0.00 | 0.00 |
| ATOM | 22981 | HE2 | MET | 1534 | 93.282 | 55.104 | 59.407 | 0.00 | 0.00 |
| ATOM | 22982 | HE3 | MET | 1534 | 94.433 | 53.713 | 59.362 | 0.00 | 0.00 |
| ATOM | 22983 | C   | MET | 1534 | 95.288 | 53.550 | 65.813 | 0.00 | 0.00 |
| ATOM | 22984 | O   | MET | 1534 | 95.438 | 54.041 | 66.978 | 0.00 | 0.00 |
| ATOM | 22985 | N   | ALA | 1535 | 94.055 | 53.065 | 65.513 | 0.00 | 0.00 |
| ATOM | 22986 | H   | ALA | 1535 | 93.923 | 52.419 | 64.748 | 0.00 | 0.00 |
| ATOM | 22987 | CA  | ALA | 1535 | 92.907 | 53.135 | 66.368 | 0.00 | 0.00 |
| ATOM | 22988 | HA  | ALA | 1535 | 92.860 | 54.207 | 66.559 | 0.00 | 0.00 |
| ATOM | 22989 | CB  | ALA | 1535 | 91.632 | 52.590 | 65.651 | 0.00 | 0.00 |
| ATOM | 22990 | HB1 | ALA | 1535 | 91.785 | 51.536 | 65.420 | 0.00 | 0.00 |
| ATOM | 22991 | HB2 | ALA | 1535 | 90.810 | 52.608 | 66.366 | 0.00 | 0.00 |
| ATOM | 22992 | HB3 | ALA | 1535 | 91.276 | 53.162 | 64.794 | 0.00 | 0.00 |
| ATOM | 22993 | C   | ALA | 1535 | 93.150 | 52.459 | 67.747 | 0.00 | 0.00 |
| ATOM | 22994 | O   | ALA | 1535 | 92.523 | 52.770 | 68.761 | 0.00 | 0.00 |
| ATOM | 22995 | N   | GLN | 1536 | 94.182 | 51.611 | 67.909 | 0.00 | 0.00 |
| ATOM | 22996 | H   | GLN | 1536 | 94.769 | 51.314 | 67.142 | 0.00 | 0.00 |
| ATOM | 22997 | CA  | GLN | 1536 | 94.542 | 51.020 | 69.211 | 0.00 | 0.00 |
| ATOM | 22998 | HA  | GLN | 1536 | 93.637 | 50.612 | 69.662 | 0.00 | 0.00 |
| ATOM | 22999 | CB  | GLN | 1536 | 95.371 | 49.717 | 69.041 | 0.00 | 0.00 |
| ATOM | 23000 | HB2 | GLN | 1536 | 95.516 | 49.333 | 70.051 | 0.00 | 0.00 |
| ATOM | 23001 | HB3 | GLN | 1536 | 94.729 | 49.056 | 68.459 | 0.00 | 0.00 |
| ATOM | 23002 | CG  | GLN | 1536 | 96.602 | 49.714 | 68.234 | 0.00 | 0.00 |
| ATOM | 23003 | HG2 | GLN | 1536 | 96.959 | 48.687 | 68.152 | 0.00 | 0.00 |
| ATOM | 23004 | HG3 | GLN | 1536 | 96.336 | 50.103 | 67.251 | 0.00 | 0.00 |



|      |       |      |     |      |         |        |        |      |      |
|------|-------|------|-----|------|---------|--------|--------|------|------|
| ATOM | 23005 | CD   | GLN | 1536 | 97.756  | 50.586 | 68.756 | 0.00 | 0.00 |
| ATOM | 23006 | OE1  | GLN | 1536 | 98.187  | 51.527 | 68.127 | 0.00 | 0.00 |
| ATOM | 23007 | NE2  | GLN | 1536 | 98.228  | 50.275 | 69.922 | 0.00 | 0.00 |
| ATOM | 23008 | 1HE2 | GLN | 1536 | 99.027  | 50.764 | 70.299 | 0.00 | 0.00 |
| ATOM | 23009 | 2HE2 | GLN | 1536 | 97.836  | 49.546 | 70.500 | 0.00 | 0.00 |
| ATOM | 23010 | C    | GLN | 1536 | 95.134  | 51.943 | 70.243 | 0.00 | 0.00 |
| ATOM | 23011 | O    | GLN | 1536 | 95.301  | 51.516 | 71.398 | 0.00 | 0.00 |
| ATOM | 23012 | N    | ARG | 1537 | 95.376  | 53.249 | 69.864 | 0.00 | 0.00 |
| ATOM | 23013 | H    | ARG | 1537 | 95.285  | 53.493 | 68.888 | 0.00 | 0.00 |
| ATOM | 23014 | CA   | ARG | 1537 | 96.064  | 54.283 | 70.738 | 0.00 | 0.00 |
| ATOM | 23015 | HA   | ARG | 1537 | 95.641  | 54.182 | 71.737 | 0.00 | 0.00 |
| ATOM | 23016 | CB   | ARG | 1537 | 97.594  | 54.062 | 70.825 | 0.00 | 0.00 |
| ATOM | 23017 | HB2  | ARG | 1537 | 98.052  | 54.471 | 71.726 | 0.00 | 0.00 |
| ATOM | 23018 | HB3  | ARG | 1537 | 97.797  | 53.000 | 70.965 | 0.00 | 0.00 |
| ATOM | 23019 | CG   | ARG | 1537 | 98.415  | 54.548 | 69.683 | 0.00 | 0.00 |
| ATOM | 23020 | HG2  | ARG | 1537 | 97.873  | 54.377 | 68.754 | 0.00 | 0.00 |
| ATOM | 23021 | HG3  | ARG | 1537 | 98.359  | 55.635 | 69.631 | 0.00 | 0.00 |
| ATOM | 23022 | CD   | ARG | 1537 | 99.861  | 54.116 | 69.694 | 0.00 | 0.00 |
| ATOM | 23023 | HD2  | ARG | 1537 | 100.333 | 54.385 | 70.639 | 0.00 | 0.00 |
| ATOM | 23024 | HD3  | ARG | 1537 | 99.822  | 53.033 | 69.584 | 0.00 | 0.00 |
| ATOM | 23025 | NE   | ARG | 1537 | 100.647 | 54.809 | 68.653 | 0.00 | 0.00 |
| ATOM | 23026 | HE   | ARG | 1537 | 101.327 | 55.485 | 68.970 | 0.00 | 0.00 |
| ATOM | 23027 | CZ   | ARG | 1537 | 100.511 | 54.674 | 67.316 | 0.00 | 0.00 |
| ATOM | 23028 | NH1  | ARG | 1537 | 99.886  | 53.563 | 66.940 | 0.00 | 0.00 |
| ATOM | 23029 | 1HH1 | ARG | 1537 | 99.745  | 53.283 | 65.980 | 0.00 | 0.00 |
| ATOM | 23030 | 2HH1 | ARG | 1537 | 99.559  | 52.890 | 67.618 | 0.00 | 0.00 |

|      |       |      |     |      |         |        |        |      |      |
|------|-------|------|-----|------|---------|--------|--------|------|------|
| ATOM | 23031 | NH2  | ARG | 1537 | 101.194 | 55.296 | 66.435 | 0.00 | 0.00 |
| ATOM | 23032 | 1HH2 | ARG | 1537 | 101.213 | 54.984 | 65.475 | 0.00 | 0.00 |
| ATOM | 23033 | 2HH2 | ARG | 1537 | 101.968 | 55.831 | 66.800 | 0.00 | 0.00 |
| ATOM | 23034 | C    | ARG | 1537 | 95.743  | 55.793 | 70.404 | 0.00 | 0.00 |
| ATOM | 23035 | O    | ARG | 1537 | 96.397  | 56.725 | 70.877 | 0.00 | 0.00 |
| ATOM | 23036 | N    | TYR | 1538 | 94.745  | 56.054 | 69.552 | 0.00 | 0.00 |
| ATOM | 23037 | H    | TYR | 1538 | 94.273  | 55.237 | 69.191 | 0.00 | 0.00 |
| ATOM | 23038 | CA   | TYR | 1538 | 94.377  | 57.407 | 68.990 | 0.00 | 0.00 |
| ATOM | 23039 | HA   | TYR | 1538 | 95.187  | 58.136 | 69.011 | 0.00 | 0.00 |
| ATOM | 23040 | CB   | TYR | 1538 | 94.032  | 57.183 | 67.519 | 0.00 | 0.00 |
| ATOM | 23041 | HB2  | TYR | 1538 | 93.632  | 56.194 | 67.296 | 0.00 | 0.00 |
| ATOM | 23042 | HB3  | TYR | 1538 | 93.200  | 57.820 | 67.216 | 0.00 | 0.00 |
| ATOM | 23043 | CG   | TYR | 1538 | 95.194  | 57.389 | 66.586 | 0.00 | 0.00 |
| ATOM | 23044 | CD1  | TYR | 1538 | 96.436  | 56.787 | 66.750 | 0.00 | 0.00 |
| ATOM | 23045 | HD1  | TYR | 1538 | 96.604  | 56.165 | 67.616 | 0.00 | 0.00 |
| ATOM | 23046 | CE1  | TYR | 1538 | 97.490  | 57.163 | 65.918 | 0.00 | 0.00 |
| ATOM | 23047 | HE1  | TYR | 1538 | 98.467  | 56.753 | 66.130 | 0.00 | 0.00 |
| ATOM | 23048 | CZ   | TYR | 1538 | 97.251  | 58.020 | 64.835 | 0.00 | 0.00 |
| ATOM | 23049 | OH   | TYR | 1538 | 98.277  | 58.348 | 64.049 | 0.00 | 0.00 |
| ATOM | 23050 | HH   | TYR | 1538 | 97.940  | 58.819 | 63.284 | 0.00 | 0.00 |
| ATOM | 23051 | CE2  | TYR | 1538 | 95.979  | 58.561 | 64.594 | 0.00 | 0.00 |
| ATOM | 23052 | HE2  | TYR | 1538 | 95.881  | 59.181 | 63.715 | 0.00 | 0.00 |
| ATOM | 23053 | CD2  | TYR | 1538 | 94.959  | 58.319 | 65.535 | 0.00 | 0.00 |
| ATOM | 23054 | HD2  | TYR | 1538 | 93.937  | 58.621 | 65.361 | 0.00 | 0.00 |
| ATOM | 23055 | C    | TYR | 1538 | 93.181  | 58.082 | 69.668 | 0.00 | 0.00 |
| ATOM | 23056 | O    | TYR | 1538 | 92.791  | 59.215 | 69.366 | 0.00 | 0.00 |

|      |       |     |     |      |        |        |        |      |      |
|------|-------|-----|-----|------|--------|--------|--------|------|------|
| ATOM | 23057 | N   | PHE | 1539 | 92.456 | 57.356 | 70.561 | 0.00 | 0.00 |
| ATOM | 23058 | H   | PHE | 1539 | 92.841 | 56.445 | 70.763 | 0.00 | 0.00 |
| ATOM | 23059 | CA  | PHE | 1539 | 91.178 | 57.753 | 71.131 | 0.00 | 0.00 |
| ATOM | 23060 | HA  | PHE | 1539 | 90.974 | 58.794 | 70.879 | 0.00 | 0.00 |
| ATOM | 23061 | CB  | PHE | 1539 | 90.166 | 56.899 | 70.522 | 0.00 | 0.00 |
| ATOM | 23062 | HB2 | PHE | 1539 | 90.467 | 55.852 | 70.492 | 0.00 | 0.00 |
| ATOM | 23063 | HB3 | PHE | 1539 | 89.252 | 57.007 | 71.105 | 0.00 | 0.00 |
| ATOM | 23064 | CG  | PHE | 1539 | 89.661 | 57.386 | 69.144 | 0.00 | 0.00 |
| ATOM | 23065 | CD1 | PHE | 1539 | 90.354 | 56.920 | 68.036 | 0.00 | 0.00 |
| ATOM | 23066 | HD1 | PHE | 1539 | 91.223 | 56.282 | 68.082 | 0.00 | 0.00 |
| ATOM | 23067 | CE1 | PHE | 1539 | 89.939 | 57.247 | 66.723 | 0.00 | 0.00 |
| ATOM | 23068 | HE1 | PHE | 1539 | 90.536 | 56.992 | 65.860 | 0.00 | 0.00 |
| ATOM | 23069 | CZ  | PHE | 1539 | 88.743 | 58.077 | 66.564 | 0.00 | 0.00 |
| ATOM | 23070 | HZ  | PHE | 1539 | 88.287 | 58.265 | 65.603 | 0.00 | 0.00 |
| ATOM | 23071 | CE2 | PHE | 1539 | 88.039 | 58.516 | 67.682 | 0.00 | 0.00 |
| ATOM | 23072 | HE2 | PHE | 1539 | 87.124 | 59.074 | 67.550 | 0.00 | 0.00 |
| ATOM | 23073 | CD2 | PHE | 1539 | 88.532 | 58.233 | 68.948 | 0.00 | 0.00 |
| ATOM | 23074 | HD2 | PHE | 1539 | 87.961 | 58.492 | 69.827 | 0.00 | 0.00 |
| ATOM | 23075 | C   | PHE | 1539 | 91.165 | 57.599 | 72.701 | 0.00 | 0.00 |
| ATOM | 23076 | O   | PHE | 1539 | 91.666 | 56.576 | 73.219 | 0.00 | 0.00 |
| ATOM | 23077 | N   | LEU | 1540 | 90.550 | 58.493 | 73.396 | 0.00 | 0.00 |
| ATOM | 23078 | H   | LEU | 1540 | 90.102 | 59.239 | 72.883 | 0.00 | 0.00 |
| ATOM | 23079 | CA  | LEU | 1540 | 90.366 | 58.445 | 74.865 | 0.00 | 0.00 |
| ATOM | 23080 | HA  | LEU | 1540 | 91.322 | 58.340 | 75.378 | 0.00 | 0.00 |
| ATOM | 23081 | CB  | LEU | 1540 | 89.843 | 59.840 | 75.371 | 0.00 | 0.00 |
| ATOM | 23082 | HB2 | LEU | 1540 | 90.508 | 60.602 | 74.964 | 0.00 | 0.00 |

|            |          |      |        |        |        |      |      |
|------------|----------|------|--------|--------|--------|------|------|
| ATOM 23083 | HB3 LEU  | 1540 | 88.840 | 59.935 | 74.955 | 0.00 | 0.00 |
| ATOM 23084 | CG LEU   | 1540 | 89.730 | 60.044 | 76.932 | 0.00 | 0.00 |
| ATOM 23085 | HG LEU   | 1540 | 89.183 | 59.196 | 77.346 | 0.00 | 0.00 |
| ATOM 23086 | CD1 LEU  | 1540 | 91.144 | 60.038 | 77.637 | 0.00 | 0.00 |
| ATOM 23087 | 1HD1 LEU | 1540 | 91.870 | 60.710 | 77.179 | 0.00 | 0.00 |
| ATOM 23088 | 2HD1 LEU | 1540 | 90.956 | 60.236 | 78.692 | 0.00 | 0.00 |
| ATOM 23089 | 3HD1 LEU | 1540 | 91.606 | 59.053 | 77.563 | 0.00 | 0.00 |
| ATOM 23090 | CD2 LEU  | 1540 | 88.990 | 61.340 | 77.253 | 0.00 | 0.00 |
| ATOM 23091 | 1HD2 LEU | 1540 | 88.061 | 61.329 | 76.682 | 0.00 | 0.00 |
| ATOM 23092 | 2HD2 LEU | 1540 | 88.768 | 61.417 | 78.317 | 0.00 | 0.00 |
| ATOM 23093 | 3HD2 LEU | 1540 | 89.602 | 62.177 | 76.917 | 0.00 | 0.00 |
| ATOM 23094 | C LEU    | 1540 | 89.551 | 57.210 | 75.321 | 0.00 | 0.00 |
| ATOM 23095 | O LEU    | 1540 | 89.703 | 56.860 | 76.517 | 0.00 | 0.00 |
| ATOM 23096 | N PHC    | 1541 | 88.654 | 56.524 | 74.601 | 0.00 | 0.00 |
| ATOM 23097 | H PHC    | 1541 | 88.483 | 56.891 | 73.675 | 0.00 | 0.00 |
| ATOM 23098 | CA PHC   | 1541 | 87.932 | 55.313 | 74.974 | 0.00 | 0.00 |
| ATOM 23099 | HA PHC   | 1541 | 88.591 | 54.747 | 75.633 | 0.00 | 0.00 |
| ATOM 23100 | CB PHC   | 1541 | 86.548 | 55.591 | 75.699 | 0.00 | 0.00 |
| ATOM 23101 | HB2 PHC  | 1541 | 85.766 | 55.974 | 75.043 | 0.00 | 0.00 |
| ATOM 23102 | HB3 PHC  | 1541 | 86.199 | 54.597 | 75.977 | 0.00 | 0.00 |
| ATOM 23103 | CG PHC   | 1541 | 86.585 | 56.406 | 76.888 | 0.00 | 0.00 |
| ATOM 23104 | CD1 PHC  | 1541 | 86.596 | 57.790 | 76.784 | 0.00 | 0.00 |
| ATOM 23105 | HD1 PHC  | 1541 | 86.556 | 58.246 | 75.806 | 0.00 | 0.00 |
| ATOM 23106 | CE1 PHC  | 1541 | 86.672 | 58.582 | 77.999 | 0.00 | 0.00 |
| ATOM 23107 | HE1 PHC  | 1541 | 86.886 | 59.629 | 77.840 | 0.00 | 0.00 |
| ATOM 23108 | CZ PHC   | 1541 | 86.670 | 57.948 | 79.266 | 0.00 | 0.00 |

|      |       |     |     |      |        |        |        |      |      |
|------|-------|-----|-----|------|--------|--------|--------|------|------|
| ATOM | 23109 | HZ  | PHC | 1541 | 86.832 | 58.516 | 80.170 | 0.00 | 0.00 |
| ATOM | 23110 | CE2 | PHC | 1541 | 86.699 | 56.519 | 79.321 | 0.00 | 0.00 |
| ATOM | 23111 | HE2 | PHC | 1541 | 86.781 | 56.032 | 80.281 | 0.00 | 0.00 |
| ATOM | 23112 | CD2 | PHC | 1541 | 86.559 | 55.774 | 78.148 | 0.00 | 0.00 |
| ATOM | 23113 | HD2 | PHC | 1541 | 86.588 | 54.705 | 78.295 | 0.00 | 0.00 |
| ATOM | 23114 | C   | PHC | 1541 | 87.773 | 54.358 | 73.846 | 0.00 | 0.00 |
| ATOM | 23115 | O   | PHC | 1541 | 88.430 | 53.302 | 73.875 | 0.00 | 0.00 |
| ATOM | 23116 | OXT | PHC | 1541 | 86.951 | 54.652 | 72.888 | 0.00 | 0.00 |
| ATOM | 23117 | O   | ONB | 1542 | 71.119 | 46.337 | 57.716 | 0.00 | 0.00 |
| ATOM | 23118 | H1  | ONB | 1542 | 72.067 | 46.300 | 57.865 | 0.00 | 0.00 |
| ATOM | 23119 | H1  | ON1 | 1543 | 69.936 | 45.304 | 58.482 | 0.00 | 0.00 |
| ATOM | 23120 | O   | ON1 | 1543 | 69.298 | 45.384 | 57.700 | 0.00 | 0.00 |
| ATOM | 23121 | H2  | ON1 | 1543 | 69.421 | 46.371 | 57.510 | 0.00 | 0.00 |
| ATOM | 23122 | H1  | ON2 | 1544 | 69.821 | 47.929 | 60.146 | 0.00 | 0.00 |
| ATOM | 23123 | O   | ON2 | 1544 | 70.151 | 47.104 | 59.661 | 0.00 | 0.00 |
| ATOM | 23124 | H2  | ON2 | 1544 | 71.160 | 47.130 | 59.733 | 0.00 | 0.00 |
| TER  | 0     |     |     | 0    |        |        |        |      |      |
| ATOM | 23125 | NI  | NI1 | 1545 | 96.745 | 93.302 | 63.905 | 0.00 | 0.00 |
| ATOM | 23126 | NI  | NI2 | 1546 | 94.019 | 91.375 | 64.733 | 0.00 | 0.00 |
| ATOM | 23127 | N   | MEN | 1547 | 69.652 | 52.888 | 82.864 | 0.00 | 0.00 |
| ATOM | 23128 | H1  | MEN | 1547 | 70.156 | 52.054 | 82.598 | 0.00 | 0.00 |
| ATOM | 23129 | H2  | MEN | 1547 | 69.148 | 53.178 | 82.039 | 0.00 | 0.00 |
| ATOM | 23130 | H3  | MEN | 1547 | 68.837 | 52.689 | 83.427 | 0.00 | 0.00 |
| ATOM | 23131 | CA  | MEN | 1547 | 70.486 | 54.063 | 83.399 | 0.00 | 0.00 |
| ATOM | 23132 | HA  | MEN | 1547 | 70.658 | 53.988 | 84.472 | 0.00 | 0.00 |
| ATOM | 23133 | CB  | MEN | 1547 | 71.825 | 54.291 | 82.791 | 0.00 | 0.00 |

|      |       |     |     |      |        |        |        |      |      |
|------|-------|-----|-----|------|--------|--------|--------|------|------|
| ATOM | 23134 | HB2 | MEN | 1547 | 72.437 | 53.499 | 83.222 | 0.00 | 0.00 |
| ATOM | 23135 | HB3 | MEN | 1547 | 71.697 | 54.274 | 81.709 | 0.00 | 0.00 |
| ATOM | 23136 | CG  | MEN | 1547 | 72.574 | 55.580 | 83.104 | 0.00 | 0.00 |
| ATOM | 23137 | HG2 | MEN | 1547 | 71.992 | 56.497 | 83.016 | 0.00 | 0.00 |
| ATOM | 23138 | HG3 | MEN | 1547 | 72.783 | 55.615 | 84.174 | 0.00 | 0.00 |
| ATOM | 23139 | SD  | MEN | 1547 | 74.300 | 55.803 | 82.483 | 0.00 | 0.00 |
| ATOM | 23140 | CE  | MEN | 1547 | 75.085 | 54.399 | 83.266 | 0.00 | 0.00 |
| ATOM | 23141 | HE1 | MEN | 1547 | 74.581 | 53.531 | 82.841 | 0.00 | 0.00 |
| ATOM | 23142 | HE2 | MEN | 1547 | 76.166 | 54.447 | 83.139 | 0.00 | 0.00 |
| ATOM | 23143 | HE3 | MEN | 1547 | 74.878 | 54.634 | 84.310 | 0.00 | 0.00 |
| ATOM | 23144 | C   | MEN | 1547 | 69.679 | 55.329 | 83.296 | 0.00 | 0.00 |
| ATOM | 23145 | O   | MEN | 1547 | 69.009 | 55.725 | 84.271 | 0.00 | 0.00 |
| ATOM | 23146 | N   | GLU | 1548 | 69.440 | 55.867 | 82.074 | 0.00 | 0.00 |
| ATOM | 23147 | H   | GLU | 1548 | 70.025 | 55.602 | 81.295 | 0.00 | 0.00 |
| ATOM | 23148 | CA  | GLU | 1548 | 68.489 | 56.931 | 81.746 | 0.00 | 0.00 |
| ATOM | 23149 | HA  | GLU | 1548 | 68.689 | 57.204 | 80.709 | 0.00 | 0.00 |
| ATOM | 23150 | CB  | GLU | 1548 | 67.020 | 56.423 | 81.824 | 0.00 | 0.00 |
| ATOM | 23151 | HB2 | GLU | 1548 | 66.785 | 55.959 | 82.782 | 0.00 | 0.00 |
| ATOM | 23152 | HB3 | GLU | 1548 | 66.291 | 57.225 | 81.708 | 0.00 | 0.00 |
| ATOM | 23153 | CG  | GLU | 1548 | 66.683 | 55.349 | 80.847 | 0.00 | 0.00 |
| ATOM | 23154 | HG2 | GLU | 1548 | 65.597 | 55.276 | 80.904 | 0.00 | 0.00 |
| ATOM | 23155 | HG3 | GLU | 1548 | 66.919 | 55.623 | 79.818 | 0.00 | 0.00 |
| ATOM | 23156 | CD  | GLU | 1548 | 67.288 | 53.961 | 81.146 | 0.00 | 0.00 |
| ATOM | 23157 | OE1 | GLU | 1548 | 66.910 | 53.365 | 82.168 | 0.00 | 0.00 |
| ATOM | 23158 | OE2 | GLU | 1548 | 68.287 | 53.500 | 80.524 | 0.00 | 0.00 |
| ATOM | 23159 | C   | GLU | 1548 | 68.601 | 58.307 | 82.530 | 0.00 | 0.00 |

|      |       |      |     |      |        |        |        |      |      |
|------|-------|------|-----|------|--------|--------|--------|------|------|
| ATOM | 23160 | O    | GLU | 1548 | 67.660 | 58.820 | 83.134 | 0.00 | 0.00 |
| ATOM | 23161 | N    | LEU | 1549 | 69.764 | 59.017 | 82.445 | 0.00 | 0.00 |
| ATOM | 23162 | H    | LEU | 1549 | 70.574 | 58.648 | 81.968 | 0.00 | 0.00 |
| ATOM | 23163 | CA   | LEU | 1549 | 70.026 | 60.307 | 83.129 | 0.00 | 0.00 |
| ATOM | 23164 | HA   | LEU | 1549 | 69.625 | 60.285 | 84.143 | 0.00 | 0.00 |
| ATOM | 23165 | CB   | LEU | 1549 | 71.557 | 60.576 | 83.311 | 0.00 | 0.00 |
| ATOM | 23166 | HB2  | LEU | 1549 | 71.950 | 61.035 | 82.403 | 0.00 | 0.00 |
| ATOM | 23167 | HB3  | LEU | 1549 | 71.684 | 61.346 | 84.072 | 0.00 | 0.00 |
| ATOM | 23168 | CG   | LEU | 1549 | 72.422 | 59.356 | 83.614 | 0.00 | 0.00 |
| ATOM | 23169 | HG   | LEU | 1549 | 72.201 | 58.579 | 82.882 | 0.00 | 0.00 |
| ATOM | 23170 | CD1  | LEU | 1549 | 73.957 | 59.569 | 83.630 | 0.00 | 0.00 |
| ATOM | 23171 | 1HD1 | LEU | 1549 | 74.216 | 59.529 | 82.572 | 0.00 | 0.00 |
| ATOM | 23172 | 2HD1 | LEU | 1549 | 74.187 | 60.488 | 84.169 | 0.00 | 0.00 |
| ATOM | 23173 | 3HD1 | LEU | 1549 | 74.512 | 58.687 | 83.949 | 0.00 | 0.00 |
| ATOM | 23174 | CD2  | LEU | 1549 | 72.157 | 58.799 | 85.006 | 0.00 | 0.00 |
| ATOM | 23175 | 1HD2 | LEU | 1549 | 72.678 | 57.860 | 85.195 | 0.00 | 0.00 |
| ATOM | 23176 | 2HD2 | LEU | 1549 | 72.430 | 59.545 | 85.752 | 0.00 | 0.00 |
| ATOM | 23177 | 3HD2 | LEU | 1549 | 71.096 | 58.699 | 85.237 | 0.00 | 0.00 |
| ATOM | 23178 | C    | LEU | 1549 | 69.163 | 61.477 | 82.481 | 0.00 | 0.00 |
| ATOM | 23179 | O    | LEU | 1549 | 69.041 | 61.606 | 81.265 | 0.00 | 0.00 |
| ATOM | 23180 | N    | THR | 1550 | 68.629 | 62.319 | 83.363 | 0.00 | 0.00 |
| ATOM | 23181 | H    | THR | 1550 | 68.846 | 62.123 | 84.330 | 0.00 | 0.00 |
| ATOM | 23182 | CA   | THR | 1550 | 67.904 | 63.527 | 83.049 | 0.00 | 0.00 |
| ATOM | 23183 | HA   | THR | 1550 | 67.593 | 63.408 | 82.011 | 0.00 | 0.00 |
| ATOM | 23184 | CB   | THR | 1550 | 66.662 | 63.680 | 84.010 | 0.00 | 0.00 |
| ATOM | 23185 | HB   | THR | 1550 | 66.077 | 64.570 | 83.777 | 0.00 | 0.00 |

|      |       |      |     |      |        |        |        |      |      |
|------|-------|------|-----|------|--------|--------|--------|------|------|
| ATOM | 23186 | CG2  | THR | 1550 | 65.656 | 62.510 | 83.960 | 0.00 | 0.00 |
| ATOM | 23187 | 1HG2 | THR | 1550 | 66.223 | 61.579 | 83.930 | 0.00 | 0.00 |
| ATOM | 23188 | 2HG2 | THR | 1550 | 64.843 | 62.618 | 84.677 | 0.00 | 0.00 |
| ATOM | 23189 | 3HG2 | THR | 1550 | 65.239 | 62.509 | 82.953 | 0.00 | 0.00 |
| ATOM | 23190 | OG1  | THR | 1550 | 67.090 | 63.927 | 85.310 | 0.00 | 0.00 |
| ATOM | 23191 | HG1  | THR | 1550 | 67.633 | 63.223 | 85.672 | 0.00 | 0.00 |
| ATOM | 23192 | C    | THR | 1550 | 68.853 | 64.733 | 83.214 | 0.00 | 0.00 |
| ATOM | 23193 | O    | THR | 1550 | 69.979 | 64.503 | 83.515 | 0.00 | 0.00 |
| ATOM | 23194 | N    | PRO | 1551 | 68.455 | 65.983 | 82.875 | 0.00 | 0.00 |
| ATOM | 23195 | CD   | PRO | 1551 | 67.234 | 66.271 | 82.168 | 0.00 | 0.00 |
| ATOM | 23196 | HD2  | PRO | 1551 | 66.563 | 66.461 | 83.007 | 0.00 | 0.00 |
| ATOM | 23197 | HD3  | PRO | 1551 | 66.995 | 65.470 | 81.469 | 0.00 | 0.00 |
| ATOM | 23198 | CG   | PRO | 1551 | 67.381 | 67.603 | 81.474 | 0.00 | 0.00 |
| ATOM | 23199 | HG2  | PRO | 1551 | 67.710 | 67.253 | 80.496 | 0.00 | 0.00 |
| ATOM | 23200 | HG3  | PRO | 1551 | 66.438 | 68.116 | 81.285 | 0.00 | 0.00 |
| ATOM | 23201 | CB   | PRO | 1551 | 68.550 | 68.263 | 82.179 | 0.00 | 0.00 |
| ATOM | 23202 | HB2  | PRO | 1551 | 69.135 | 68.818 | 81.445 | 0.00 | 0.00 |
| ATOM | 23203 | HB3  | PRO | 1551 | 68.194 | 69.024 | 82.874 | 0.00 | 0.00 |
| ATOM | 23204 | CA   | PRO | 1551 | 69.397 | 67.113 | 82.775 | 0.00 | 0.00 |
| ATOM | 23205 | HA   | PRO | 1551 | 70.180 | 67.065 | 82.017 | 0.00 | 0.00 |
| ATOM | 23206 | C    | PRO | 1551 | 70.030 | 67.496 | 84.090 | 0.00 | 0.00 |
| ATOM | 23207 | O    | PRO | 1551 | 71.229 | 67.509 | 84.179 | 0.00 | 0.00 |
| ATOM | 23208 | N    | ARG | 1552 | 69.232 | 67.499 | 85.165 | 0.00 | 0.00 |
| ATOM | 23209 | H    | ARG | 1552 | 68.256 | 67.373 | 84.935 | 0.00 | 0.00 |
| ATOM | 23210 | CA   | ARG | 1552 | 69.734 | 67.652 | 86.523 | 0.00 | 0.00 |
| ATOM | 23211 | HA   | ARG | 1552 | 70.228 | 68.619 | 86.423 | 0.00 | 0.00 |



|      |       |      |     |      |        |        |        |      |      |
|------|-------|------|-----|------|--------|--------|--------|------|------|
| ATOM | 23212 | CB   | ARG | 1552 | 68.607 | 67.644 | 87.496 | 0.00 | 0.00 |
| ATOM | 23213 | HB2  | ARG | 1552 | 68.972 | 68.250 | 88.326 | 0.00 | 0.00 |
| ATOM | 23214 | HB3  | ARG | 1552 | 67.717 | 68.053 | 87.019 | 0.00 | 0.00 |
| ATOM | 23215 | CG   | ARG | 1552 | 68.227 | 66.351 | 88.050 | 0.00 | 0.00 |
| ATOM | 23216 | HG2  | ARG | 1552 | 69.101 | 66.005 | 88.603 | 0.00 | 0.00 |
| ATOM | 23217 | HG3  | ARG | 1552 | 67.976 | 65.645 | 87.259 | 0.00 | 0.00 |
| ATOM | 23218 | CD   | ARG | 1552 | 67.074 | 66.435 | 89.073 | 0.00 | 0.00 |
| ATOM | 23219 | HD2  | ARG | 1552 | 67.226 | 67.287 | 89.736 | 0.00 | 0.00 |
| ATOM | 23220 | HD3  | ARG | 1552 | 66.166 | 66.581 | 88.489 | 0.00 | 0.00 |
| ATOM | 23221 | NE   | ARG | 1552 | 66.974 | 65.297 | 90.028 | 0.00 | 0.00 |
| ATOM | 23222 | HE   | ARG | 1552 | 67.808 | 64.747 | 90.180 | 0.00 | 0.00 |
| ATOM | 23223 | CZ   | ARG | 1552 | 65.853 | 64.960 | 90.714 | 0.00 | 0.00 |
| ATOM | 23224 | NH1  | ARG | 1552 | 65.863 | 63.849 | 91.378 | 0.00 | 0.00 |
| ATOM | 23225 | 1HH1 | ARG | 1552 | 65.127 | 63.798 | 92.068 | 0.00 | 0.00 |
| ATOM | 23226 | 2HH1 | ARG | 1552 | 66.746 | 63.427 | 91.629 | 0.00 | 0.00 |
| ATOM | 23227 | NH2  | ARG | 1552 | 64.782 | 65.740 | 90.884 | 0.00 | 0.00 |
| ATOM | 23228 | 1HH2 | ARG | 1552 | 64.002 | 65.466 | 91.465 | 0.00 | 0.00 |
| ATOM | 23229 | 2HH2 | ARG | 1552 | 64.847 | 66.708 | 90.604 | 0.00 | 0.00 |
| ATOM | 23230 | C    | ARG | 1552 | 70.824 | 66.620 | 86.940 | 0.00 | 0.00 |
| ATOM | 23231 | O    | ARG | 1552 | 71.785 | 67.020 | 87.644 | 0.00 | 0.00 |
| ATOM | 23232 | N    | GLU | 1553 | 70.831 | 65.440 | 86.400 | 0.00 | 0.00 |
| ATOM | 23233 | H    | GLU | 1553 | 70.029 | 65.070 | 85.910 | 0.00 | 0.00 |
| ATOM | 23234 | CA   | GLU | 1553 | 71.814 | 64.386 | 86.633 | 0.00 | 0.00 |
| ATOM | 23235 | HA   | GLU | 1553 | 72.040 | 64.406 | 87.699 | 0.00 | 0.00 |
| ATOM | 23236 | CB   | GLU | 1553 | 71.223 | 62.967 | 86.343 | 0.00 | 0.00 |
| ATOM | 23237 | HB2  | GLU | 1553 | 70.745 | 63.041 | 85.366 | 0.00 | 0.00 |

|      |       |     |     |      |        |        |        |      |      |
|------|-------|-----|-----|------|--------|--------|--------|------|------|
| ATOM | 23238 | HB3 | GLU | 1553 | 71.902 | 62.115 | 86.386 | 0.00 | 0.00 |
| ATOM | 23239 | CG  | GLU | 1553 | 70.081 | 62.645 | 87.345 | 0.00 | 0.00 |
| ATOM | 23240 | HG2 | GLU | 1553 | 70.374 | 62.398 | 88.365 | 0.00 | 0.00 |
| ATOM | 23241 | HG3 | GLU | 1553 | 69.429 | 63.512 | 87.455 | 0.00 | 0.00 |
| ATOM | 23242 | CD  | GLU | 1553 | 69.345 | 61.373 | 86.870 | 0.00 | 0.00 |
| ATOM | 23243 | OE1 | GLU | 1553 | 69.762 | 60.260 | 87.224 | 0.00 | 0.00 |
| ATOM | 23244 | OE2 | GLU | 1553 | 68.390 | 61.600 | 86.076 | 0.00 | 0.00 |
| ATOM | 23245 | C   | GLU | 1553 | 73.175 | 64.560 | 85.983 | 0.00 | 0.00 |
| ATOM | 23246 | O   | GLU | 1553 | 74.118 | 63.938 | 86.398 | 0.00 | 0.00 |
| ATOM | 23247 | N   | LYS | 1554 | 73.151 | 65.260 | 84.841 | 0.00 | 0.00 |
| ATOM | 23248 | H   | LYS | 1554 | 72.283 | 65.729 | 84.625 | 0.00 | 0.00 |
| ATOM | 23249 | CA  | LYS | 1554 | 74.335 | 65.620 | 84.072 | 0.00 | 0.00 |
| ATOM | 23250 | HA  | LYS | 1554 | 75.186 | 64.960 | 84.240 | 0.00 | 0.00 |
| ATOM | 23251 | CB  | LYS | 1554 | 73.916 | 65.578 | 82.477 | 0.00 | 0.00 |
| ATOM | 23252 | HB2 | LYS | 1554 | 73.060 | 66.213 | 82.246 | 0.00 | 0.00 |
| ATOM | 23253 | HB3 | LYS | 1554 | 74.655 | 65.870 | 81.731 | 0.00 | 0.00 |
| ATOM | 23254 | CG  | LYS | 1554 | 73.649 | 64.110 | 82.136 | 0.00 | 0.00 |
| ATOM | 23255 | HG2 | LYS | 1554 | 74.558 | 63.538 | 82.321 | 0.00 | 0.00 |
| ATOM | 23256 | HG3 | LYS | 1554 | 72.915 | 63.719 | 82.840 | 0.00 | 0.00 |
| ATOM | 23257 | CD  | LYS | 1554 | 73.239 | 63.903 | 80.703 | 0.00 | 0.00 |
| ATOM | 23258 | HD2 | LYS | 1554 | 73.913 | 64.342 | 79.967 | 0.00 | 0.00 |
| ATOM | 23259 | HD3 | LYS | 1554 | 73.340 | 62.862 | 80.396 | 0.00 | 0.00 |
| ATOM | 23260 | CE  | LYS | 1554 | 71.763 | 64.344 | 80.471 | 0.00 | 0.00 |
| ATOM | 23261 | HE2 | LYS | 1554 | 71.136 | 63.618 | 80.989 | 0.00 | 0.00 |
| ATOM | 23262 | HE3 | LYS | 1554 | 71.648 | 65.331 | 80.920 | 0.00 | 0.00 |
| ATOM | 23263 | NZ  | LYS | 1554 | 71.484 | 64.452 | 79.009 | 0.00 | 0.00 |

|      |       |     |     |      |        |        |        |      |      |
|------|-------|-----|-----|------|--------|--------|--------|------|------|
| ATOM | 23264 | HZ1 | LYS | 1554 | 70.514 | 64.602 | 78.773 | 0.00 | 0.00 |
| ATOM | 23265 | HZ2 | LYS | 1554 | 71.934 | 65.227 | 78.544 | 0.00 | 0.00 |
| ATOM | 23266 | HZ3 | LYS | 1554 | 71.764 | 63.605 | 78.536 | 0.00 | 0.00 |
| ATOM | 23267 | C   | LYS | 1554 | 74.810 | 66.987 | 84.415 | 0.00 | 0.00 |
| ATOM | 23268 | O   | LYS | 1554 | 76.051 | 67.183 | 84.356 | 0.00 | 0.00 |
| ATOM | 23269 | N   | ASP | 1555 | 74.027 | 67.938 | 84.864 | 0.00 | 0.00 |
| ATOM | 23270 | H   | ASP | 1555 | 73.054 | 67.794 | 84.633 | 0.00 | 0.00 |
| ATOM | 23271 | CA  | ASP | 1555 | 74.350 | 69.289 | 85.327 | 0.00 | 0.00 |
| ATOM | 23272 | HA  | ASP | 1555 | 75.036 | 69.786 | 84.642 | 0.00 | 0.00 |
| ATOM | 23273 | CB  | ASP | 1555 | 73.107 | 70.180 | 85.228 | 0.00 | 0.00 |
| ATOM | 23274 | HB2 | ASP | 1555 | 72.411 | 69.907 | 86.021 | 0.00 | 0.00 |
| ATOM | 23275 | HB3 | ASP | 1555 | 72.672 | 70.006 | 84.243 | 0.00 | 0.00 |
| ATOM | 23276 | CG  | ASP | 1555 | 73.394 | 71.688 | 85.502 | 0.00 | 0.00 |
| ATOM | 23277 | OD1 | ASP | 1555 | 74.501 | 72.167 | 85.137 | 0.00 | 0.00 |
| ATOM | 23278 | OD2 | ASP | 1555 | 72.366 | 72.370 | 85.718 | 0.00 | 0.00 |
| ATOM | 23279 | C   | ASP | 1555 | 74.917 | 69.297 | 86.720 | 0.00 | 0.00 |
| ATOM | 23280 | O   | ASP | 1555 | 75.979 | 69.868 | 86.907 | 0.00 | 0.00 |
| ATOM | 23281 | N   | LYS | 1556 | 74.310 | 68.589 | 87.675 | 0.00 | 0.00 |
| ATOM | 23282 | H   | LYS | 1556 | 73.425 | 68.152 | 87.462 | 0.00 | 0.00 |
| ATOM | 23283 | CA  | LYS | 1556 | 74.866 | 68.398 | 89.001 | 0.00 | 0.00 |
| ATOM | 23284 | HA  | LYS | 1556 | 75.114 | 69.389 | 89.381 | 0.00 | 0.00 |
| ATOM | 23285 | CB  | LYS | 1556 | 73.733 | 68.043 | 89.967 | 0.00 | 0.00 |
| ATOM | 23286 | HB2 | LYS | 1556 | 73.218 | 67.136 | 89.652 | 0.00 | 0.00 |
| ATOM | 23287 | HB3 | LYS | 1556 | 74.071 | 67.809 | 90.977 | 0.00 | 0.00 |
| ATOM | 23288 | CG  | LYS | 1556 | 72.645 | 69.118 | 90.040 | 0.00 | 0.00 |
| ATOM | 23289 | HG2 | LYS | 1556 | 73.039 | 69.976 | 90.586 | 0.00 | 0.00 |

|      |       |      |     |      |        |        |        |      |      |
|------|-------|------|-----|------|--------|--------|--------|------|------|
| ATOM | 23290 | HG3  | LYS | 1556 | 72.283 | 69.353 | 89.040 | 0.00 | 0.00 |
| ATOM | 23291 | CD   | LYS | 1556 | 71.414 | 68.768 | 90.847 | 0.00 | 0.00 |
| ATOM | 23292 | HD2  | LYS | 1556 | 71.056 | 67.853 | 90.376 | 0.00 | 0.00 |
| ATOM | 23293 | HD3  | LYS | 1556 | 71.770 | 68.457 | 91.829 | 0.00 | 0.00 |
| ATOM | 23294 | CE   | LYS | 1556 | 70.441 | 69.883 | 91.001 | 0.00 | 0.00 |
| ATOM | 23295 | HE2  | LYS | 1556 | 70.998 | 70.770 | 91.304 | 0.00 | 0.00 |
| ATOM | 23296 | HE3  | LYS | 1556 | 69.990 | 69.924 | 90.010 | 0.00 | 0.00 |
| ATOM | 23297 | NZ   | LYS | 1556 | 69.358 | 69.615 | 91.926 | 0.00 | 0.00 |
| ATOM | 23298 | HZ1  | LYS | 1556 | 68.681 | 70.359 | 92.014 | 0.00 | 0.00 |
| ATOM | 23299 | HZ2  | LYS | 1556 | 68.889 | 68.722 | 91.869 | 0.00 | 0.00 |
| ATOM | 23300 | HZ3  | LYS | 1556 | 69.874 | 69.749 | 92.783 | 0.00 | 0.00 |
| ATOM | 23301 | C    | LYS | 1556 | 76.170 | 67.552 | 89.009 | 0.00 | 0.00 |
| ATOM | 23302 | O    | LYS | 1556 | 76.884 | 67.529 | 89.991 | 0.00 | 0.00 |
| ATOM | 23303 | N    | LEU | 1557 | 76.372 | 66.774 | 87.968 | 0.00 | 0.00 |
| ATOM | 23304 | H    | LEU | 1557 | 75.670 | 66.721 | 87.243 | 0.00 | 0.00 |
| ATOM | 23305 | CA   | LEU | 1557 | 77.634 | 66.026 | 87.745 | 0.00 | 0.00 |
| ATOM | 23306 | HA   | LEU | 1557 | 78.012 | 65.570 | 88.660 | 0.00 | 0.00 |
| ATOM | 23307 | CB   | LEU | 1557 | 77.351 | 64.782 | 86.911 | 0.00 | 0.00 |
| ATOM | 23308 | HB2  | LEU | 1557 | 76.587 | 64.077 | 87.239 | 0.00 | 0.00 |
| ATOM | 23309 | HB3  | LEU | 1557 | 76.907 | 65.169 | 85.993 | 0.00 | 0.00 |
| ATOM | 23310 | CG   | LEU | 1557 | 78.526 | 63.900 | 86.515 | 0.00 | 0.00 |
| ATOM | 23311 | HG   | LEU | 1557 | 79.400 | 64.463 | 86.188 | 0.00 | 0.00 |
| ATOM | 23312 | CD1  | LEU | 1557 | 78.968 | 63.108 | 87.768 | 0.00 | 0.00 |
| ATOM | 23313 | 1HD1 | LEU | 1557 | 79.865 | 62.590 | 87.428 | 0.00 | 0.00 |
| ATOM | 23314 | 2HD1 | LEU | 1557 | 79.265 | 63.778 | 88.575 | 0.00 | 0.00 |
| ATOM | 23315 | 3HD1 | LEU | 1557 | 78.302 | 62.317 | 88.112 | 0.00 | 0.00 |

|      |       |      |     |      |        |        |        |      |      |
|------|-------|------|-----|------|--------|--------|--------|------|------|
| ATOM | 23316 | CD2  | LEU | 1557 | 78.151 | 62.814 | 85.490 | 0.00 | 0.00 |
| ATOM | 23317 | 1HD2 | LEU | 1557 | 78.947 | 62.071 | 85.550 | 0.00 | 0.00 |
| ATOM | 23318 | 2HD2 | LEU | 1557 | 77.143 | 62.430 | 85.644 | 0.00 | 0.00 |
| ATOM | 23319 | 3HD2 | LEU | 1557 | 78.136 | 63.263 | 84.497 | 0.00 | 0.00 |
| ATOM | 23320 | C    | LEU | 1557 | 78.776 | 66.804 | 87.181 | 0.00 | 0.00 |
| ATOM | 23321 | O    | LEU | 1557 | 79.930 | 66.586 | 87.485 | 0.00 | 0.00 |
| ATOM | 23322 | N    | LEU | 1558 | 78.517 | 67.785 | 86.362 | 0.00 | 0.00 |
| ATOM | 23323 | H    | LEU | 1558 | 77.606 | 67.857 | 85.933 | 0.00 | 0.00 |
| ATOM | 23324 | CA   | LEU | 1558 | 79.367 | 68.957 | 86.135 | 0.00 | 0.00 |
| ATOM | 23325 | HA   | LEU | 1558 | 80.303 | 68.481 | 85.844 | 0.00 | 0.00 |
| ATOM | 23326 | CB   | LEU | 1558 | 78.719 | 69.883 | 85.059 | 0.00 | 0.00 |
| ATOM | 23327 | HB2  | LEU | 1558 | 78.015 | 69.270 | 84.497 | 0.00 | 0.00 |
| ATOM | 23328 | HB3  | LEU | 1558 | 78.002 | 70.565 | 85.516 | 0.00 | 0.00 |
| ATOM | 23329 | CG   | LEU | 1558 | 79.702 | 70.746 | 84.215 | 0.00 | 0.00 |
| ATOM | 23330 | HG   | LEU | 1558 | 80.564 | 70.164 | 83.891 | 0.00 | 0.00 |
| ATOM | 23331 | CD1  | LEU | 1558 | 78.984 | 71.248 | 82.969 | 0.00 | 0.00 |
| ATOM | 23332 | 1HD1 | LEU | 1558 | 78.134 | 71.860 | 83.270 | 0.00 | 0.00 |
| ATOM | 23333 | 2HD1 | LEU | 1558 | 79.670 | 71.762 | 82.296 | 0.00 | 0.00 |
| ATOM | 23334 | 3HD1 | LEU | 1558 | 78.674 | 70.393 | 82.368 | 0.00 | 0.00 |
| ATOM | 23335 | CD2  | LEU | 1558 | 80.252 | 71.930 | 85.034 | 0.00 | 0.00 |
| ATOM | 23336 | 1HD2 | LEU | 1558 | 80.971 | 71.515 | 85.741 | 0.00 | 0.00 |
| ATOM | 23337 | 2HD2 | LEU | 1558 | 80.839 | 72.612 | 84.418 | 0.00 | 0.00 |
| ATOM | 23338 | 3HD2 | LEU | 1558 | 79.457 | 72.389 | 85.622 | 0.00 | 0.00 |
| ATOM | 23339 | C    | LEU | 1558 | 79.801 | 69.644 | 87.415 | 0.00 | 0.00 |
| ATOM | 23340 | O    | LEU | 1558 | 81.023 | 69.887 | 87.646 | 0.00 | 0.00 |
| ATOM | 23341 | N    | LEU | 1559 | 78.900 | 69.912 | 88.360 | 0.00 | 0.00 |

|      |       |      |     |      |        |        |        |      |      |
|------|-------|------|-----|------|--------|--------|--------|------|------|
| ATOM | 23342 | H    | LEU | 1559 | 77.941 | 69.712 | 88.115 | 0.00 | 0.00 |
| ATOM | 23343 | CA   | LEU | 1559 | 79.240 | 70.624 | 89.635 | 0.00 | 0.00 |
| ATOM | 23344 | HA   | LEU | 1559 | 79.835 | 71.496 | 89.365 | 0.00 | 0.00 |
| ATOM | 23345 | CB   | LEU | 1559 | 77.970 | 71.056 | 90.353 | 0.00 | 0.00 |
| ATOM | 23346 | HB2  | LEU | 1559 | 77.373 | 71.647 | 89.659 | 0.00 | 0.00 |
| ATOM | 23347 | HB3  | LEU | 1559 | 77.399 | 70.200 | 90.713 | 0.00 | 0.00 |
| ATOM | 23348 | CG   | LEU | 1559 | 78.297 | 72.019 | 91.515 | 0.00 | 0.00 |
| ATOM | 23349 | HG   | LEU | 1559 | 78.983 | 71.391 | 92.085 | 0.00 | 0.00 |
| ATOM | 23350 | CD1  | LEU | 1559 | 78.894 | 73.375 | 91.177 | 0.00 | 0.00 |
| ATOM | 23351 | 1HD1 | LEU | 1559 | 78.924 | 74.010 | 92.063 | 0.00 | 0.00 |
| ATOM | 23352 | 2HD1 | LEU | 1559 | 79.958 | 73.242 | 90.981 | 0.00 | 0.00 |
| ATOM | 23353 | 3HD1 | LEU | 1559 | 78.364 | 73.852 | 90.353 | 0.00 | 0.00 |
| ATOM | 23354 | CD2  | LEU | 1559 | 76.931 | 72.298 | 92.251 | 0.00 | 0.00 |
| ATOM | 23355 | 1HD2 | LEU | 1559 | 76.454 | 71.398 | 92.639 | 0.00 | 0.00 |
| ATOM | 23356 | 2HD2 | LEU | 1559 | 77.128 | 72.822 | 93.186 | 0.00 | 0.00 |
| ATOM | 23357 | 3HD2 | LEU | 1559 | 76.175 | 72.774 | 91.627 | 0.00 | 0.00 |
| ATOM | 23358 | C    | LEU | 1559 | 80.132 | 69.621 | 90.495 | 0.00 | 0.00 |
| ATOM | 23359 | O    | LEU | 1559 | 81.047 | 70.122 | 91.144 | 0.00 | 0.00 |
| ATOM | 23360 | N    | PHE | 1560 | 79.844 | 68.322 | 90.510 | 0.00 | 0.00 |
| ATOM | 23361 | H    | PHE | 1560 | 79.080 | 67.930 | 89.979 | 0.00 | 0.00 |
| ATOM | 23362 | CA   | PHE | 1560 | 80.664 | 67.301 | 91.191 | 0.00 | 0.00 |
| ATOM | 23363 | HA   | PHE | 1560 | 80.720 | 67.434 | 92.272 | 0.00 | 0.00 |
| ATOM | 23364 | CB   | PHE | 1560 | 80.162 | 65.876 | 90.884 | 0.00 | 0.00 |
| ATOM | 23365 | HB2  | PHE | 1560 | 79.193 | 65.631 | 91.319 | 0.00 | 0.00 |
| ATOM | 23366 | HB3  | PHE | 1560 | 80.065 | 65.757 | 89.804 | 0.00 | 0.00 |
| ATOM | 23367 | CG   | PHE | 1560 | 81.184 | 64.836 | 91.251 | 0.00 | 0.00 |

|      |       |      |     |      |        |        |        |      |      |
|------|-------|------|-----|------|--------|--------|--------|------|------|
| ATOM | 23368 | CD1  | PHE | 1560 | 81.319 | 64.439 | 92.582 | 0.00 | 0.00 |
| ATOM | 23369 | HD1  | PHE | 1560 | 80.621 | 64.857 | 93.292 | 0.00 | 0.00 |
| ATOM | 23370 | CE1  | PHE | 1560 | 82.230 | 63.582 | 93.071 | 0.00 | 0.00 |
| ATOM | 23371 | HE1  | PHE | 1560 | 82.228 | 63.249 | 94.098 | 0.00 | 0.00 |
| ATOM | 23372 | CZ   | PHE | 1560 | 83.138 | 63.009 | 92.166 | 0.00 | 0.00 |
| ATOM | 23373 | HZ   | PHE | 1560 | 83.880 | 62.260 | 92.401 | 0.00 | 0.00 |
| ATOM | 23374 | CE2  | PHE | 1560 | 82.941 | 63.236 | 90.781 | 0.00 | 0.00 |
| ATOM | 23375 | HE2  | PHE | 1560 | 83.454 | 62.641 | 90.040 | 0.00 | 0.00 |
| ATOM | 23376 | CD2  | PHE | 1560 | 82.009 | 64.219 | 90.373 | 0.00 | 0.00 |
| ATOM | 23377 | HD2  | PHE | 1560 | 81.770 | 64.432 | 89.341 | 0.00 | 0.00 |
| ATOM | 23378 | C    | PHE | 1560 | 82.149 | 67.483 | 90.758 | 0.00 | 0.00 |
| ATOM | 23379 | O    | PHE | 1560 | 83.061 | 67.366 | 91.596 | 0.00 | 0.00 |
| ATOM | 23380 | N    | THR | 1561 | 82.415 | 67.677 | 89.463 | 0.00 | 0.00 |
| ATOM | 23381 | H    | THR | 1561 | 81.631 | 67.659 | 88.828 | 0.00 | 0.00 |
| ATOM | 23382 | CA   | THR | 1561 | 83.801 | 67.824 | 88.921 | 0.00 | 0.00 |
| ATOM | 23383 | HA   | THR | 1561 | 84.489 | 67.081 | 89.323 | 0.00 | 0.00 |
| ATOM | 23384 | CB   | THR | 1561 | 83.800 | 67.607 | 87.393 | 0.00 | 0.00 |
| ATOM | 23385 | HB   | THR | 1561 | 84.854 | 67.738 | 87.148 | 0.00 | 0.00 |
| ATOM | 23386 | CG2  | THR | 1561 | 83.544 | 66.146 | 86.932 | 0.00 | 0.00 |
| ATOM | 23387 | 1HG2 | THR | 1561 | 82.474 | 66.041 | 86.751 | 0.00 | 0.00 |
| ATOM | 23388 | 2HG2 | THR | 1561 | 83.845 | 65.976 | 85.899 | 0.00 | 0.00 |
| ATOM | 23389 | 3HG2 | THR | 1561 | 84.086 | 65.407 | 87.522 | 0.00 | 0.00 |
| ATOM | 23390 | OG1  | THR | 1561 | 83.055 | 68.549 | 86.628 | 0.00 | 0.00 |
| ATOM | 23391 | HG1  | THR | 1561 | 82.327 | 68.933 | 87.123 | 0.00 | 0.00 |
| ATOM | 23392 | C    | THR | 1561 | 84.408 | 69.222 | 89.303 | 0.00 | 0.00 |
| ATOM | 23393 | O    | THR | 1561 | 85.593 | 69.254 | 89.645 | 0.00 | 0.00 |

|      |       |     |     |      |        |        |        |      |      |
|------|-------|-----|-----|------|--------|--------|--------|------|------|
| ATOM | 23394 | N   | ALA | 1562 | 83.584 | 70.304 | 89.378 | 0.00 | 0.00 |
| ATOM | 23395 | H   | ALA | 1562 | 82.597 | 70.089 | 89.347 | 0.00 | 0.00 |
| ATOM | 23396 | CA  | ALA | 1562 | 84.074 | 71.544 | 90.059 | 0.00 | 0.00 |
| ATOM | 23397 | HA  | ALA | 1562 | 84.953 | 71.994 | 89.598 | 0.00 | 0.00 |
| ATOM | 23398 | CB  | ALA | 1562 | 83.022 | 72.650 | 89.843 | 0.00 | 0.00 |
| ATOM | 23399 | HB1 | ALA | 1562 | 82.171 | 72.429 | 90.487 | 0.00 | 0.00 |
| ATOM | 23400 | HB2 | ALA | 1562 | 83.344 | 73.604 | 90.260 | 0.00 | 0.00 |
| ATOM | 23401 | HB3 | ALA | 1562 | 82.830 | 72.794 | 88.780 | 0.00 | 0.00 |
| ATOM | 23402 | C   | ALA | 1562 | 84.422 | 71.290 | 91.596 | 0.00 | 0.00 |
| ATOM | 23403 | O   | ALA | 1562 | 85.456 | 71.730 | 92.060 | 0.00 | 0.00 |
| ATOM | 23404 | N   | ALA | 1563 | 83.813 | 70.347 | 92.235 | 0.00 | 0.00 |
| ATOM | 23405 | H   | ALA | 1563 | 83.023 | 69.881 | 91.813 | 0.00 | 0.00 |
| ATOM | 23406 | CA  | ALA | 1563 | 84.104 | 70.050 | 93.681 | 0.00 | 0.00 |
| ATOM | 23407 | HA  | ALA | 1563 | 84.275 | 71.004 | 94.180 | 0.00 | 0.00 |
| ATOM | 23408 | CB  | ALA | 1563 | 82.805 | 69.349 | 94.176 | 0.00 | 0.00 |
| ATOM | 23409 | HB1 | ALA | 1563 | 82.960 | 69.192 | 95.244 | 0.00 | 0.00 |
| ATOM | 23410 | HB2 | ALA | 1563 | 81.955 | 69.946 | 93.844 | 0.00 | 0.00 |
| ATOM | 23411 | HB3 | ALA | 1563 | 82.661 | 68.366 | 93.729 | 0.00 | 0.00 |
| ATOM | 23412 | C   | ALA | 1563 | 85.374 | 69.218 | 93.868 | 0.00 | 0.00 |
| ATOM | 23413 | O   | ALA | 1563 | 86.043 | 69.146 | 94.903 | 0.00 | 0.00 |
| ATOM | 23414 | N   | LEU | 1564 | 85.707 | 68.481 | 92.785 | 0.00 | 0.00 |
| ATOM | 23415 | H   | LEU | 1564 | 85.120 | 68.577 | 91.969 | 0.00 | 0.00 |
| ATOM | 23416 | CA  | LEU | 1564 | 86.827 | 67.559 | 92.669 | 0.00 | 0.00 |
| ATOM | 23417 | HA  | LEU | 1564 | 86.924 | 67.112 | 93.658 | 0.00 | 0.00 |
| ATOM | 23418 | CB  | LEU | 1564 | 86.516 | 66.466 | 91.683 | 0.00 | 0.00 |
| ATOM | 23419 | HB2 | LEU | 1564 | 85.450 | 66.556 | 91.472 | 0.00 | 0.00 |



|      |       |      |     |      |        |        |        |      |      |
|------|-------|------|-----|------|--------|--------|--------|------|------|
| ATOM | 23420 | HB3  | LEU | 1564 | 86.949 | 66.526 | 90.685 | 0.00 | 0.00 |
| ATOM | 23421 | CG   | LEU | 1564 | 86.710 | 65.009 | 92.174 | 0.00 | 0.00 |
| ATOM | 23422 | HG   | LEU | 1564 | 86.610 | 64.413 | 91.267 | 0.00 | 0.00 |
| ATOM | 23423 | CD1  | LEU | 1564 | 88.178 | 64.823 | 92.654 | 0.00 | 0.00 |
| ATOM | 23424 | 1HD1 | LEU | 1564 | 88.417 | 63.769 | 92.512 | 0.00 | 0.00 |
| ATOM | 23425 | 2HD1 | LEU | 1564 | 88.893 | 65.313 | 91.994 | 0.00 | 0.00 |
| ATOM | 23426 | 3HD1 | LEU | 1564 | 88.289 | 65.144 | 93.689 | 0.00 | 0.00 |
| ATOM | 23427 | CD2  | LEU | 1564 | 85.760 | 64.750 | 93.378 | 0.00 | 0.00 |
| ATOM | 23428 | 1HD2 | LEU | 1564 | 85.860 | 63.720 | 93.721 | 0.00 | 0.00 |
| ATOM | 23429 | 2HD2 | LEU | 1564 | 85.938 | 65.485 | 94.163 | 0.00 | 0.00 |
| ATOM | 23430 | 3HD2 | LEU | 1564 | 84.781 | 65.025 | 92.986 | 0.00 | 0.00 |
| ATOM | 23431 | C    | LEU | 1564 | 88.156 | 68.302 | 92.428 | 0.00 | 0.00 |
| ATOM | 23432 | O    | LEU | 1564 | 89.105 | 68.056 | 93.133 | 0.00 | 0.00 |
| ATOM | 23433 | N    | VAL | 1565 | 88.231 | 69.327 | 91.513 | 0.00 | 0.00 |
| ATOM | 23434 | H    | VAL | 1565 | 87.437 | 69.606 | 90.954 | 0.00 | 0.00 |
| ATOM | 23435 | CA   | VAL | 1565 | 89.348 | 70.225 | 91.346 | 0.00 | 0.00 |
| ATOM | 23436 | HA   | VAL | 1565 | 90.294 | 69.692 | 91.250 | 0.00 | 0.00 |
| ATOM | 23437 | CB   | VAL | 1565 | 89.143 | 71.049 | 90.030 | 0.00 | 0.00 |
| ATOM | 23438 | HB   | VAL | 1565 | 88.528 | 70.514 | 89.307 | 0.00 | 0.00 |
| ATOM | 23439 | CG1  | VAL | 1565 | 88.400 | 72.463 | 90.176 | 0.00 | 0.00 |
| ATOM | 23440 | 1HG1 | VAL | 1565 | 89.019 | 73.153 | 90.749 | 0.00 | 0.00 |
| ATOM | 23441 | 2HG1 | VAL | 1565 | 88.345 | 72.888 | 89.174 | 0.00 | 0.00 |
| ATOM | 23442 | 3HG1 | VAL | 1565 | 87.444 | 72.264 | 90.661 | 0.00 | 0.00 |
| ATOM | 23443 | CG2  | VAL | 1565 | 90.485 | 71.319 | 89.381 | 0.00 | 0.00 |
| ATOM | 23444 | 1HG2 | VAL | 1565 | 91.091 | 70.413 | 89.368 | 0.00 | 0.00 |
| ATOM | 23445 | 2HG2 | VAL | 1565 | 90.389 | 71.546 | 88.319 | 0.00 | 0.00 |

|      |       |      |     |      |        |        |        |      |      |
|------|-------|------|-----|------|--------|--------|--------|------|------|
| ATOM | 23446 | 3HG2 | VAL | 1565 | 91.060 | 72.107 | 89.866 | 0.00 | 0.00 |
| ATOM | 23447 | C    | VAL | 1565 | 89.499 | 71.080 | 92.643 | 0.00 | 0.00 |
| ATOM | 23448 | O    | VAL | 1565 | 90.606 | 71.369 | 93.120 | 0.00 | 0.00 |
| ATOM | 23449 | N    | ALA | 1566 | 88.387 | 71.481 | 93.283 | 0.00 | 0.00 |
| ATOM | 23450 | H    | ALA | 1566 | 87.458 | 71.298 | 92.931 | 0.00 | 0.00 |
| ATOM | 23451 | CA   | ALA | 1566 | 88.485 | 72.094 | 94.578 | 0.00 | 0.00 |
| ATOM | 23452 | HA   | ALA | 1566 | 89.027 | 73.039 | 94.582 | 0.00 | 0.00 |
| ATOM | 23453 | CB   | ALA | 1566 | 87.058 | 72.531 | 94.917 | 0.00 | 0.00 |
| ATOM | 23454 | HB1  | ALA | 1566 | 86.400 | 71.668 | 95.014 | 0.00 | 0.00 |
| ATOM | 23455 | HB2  | ALA | 1566 | 87.026 | 73.109 | 95.840 | 0.00 | 0.00 |
| ATOM | 23456 | HB3  | ALA | 1566 | 86.694 | 73.238 | 94.172 | 0.00 | 0.00 |
| ATOM | 23457 | C    | ALA | 1566 | 89.149 | 71.257 | 95.676 | 0.00 | 0.00 |
| ATOM | 23458 | O    | ALA | 1566 | 90.107 | 71.822 | 96.271 | 0.00 | 0.00 |
| ATOM | 23459 | N    | GLU | 1567 | 88.810 | 69.997 | 95.939 | 0.00 | 0.00 |
| ATOM | 23460 | H    | GLU | 1567 | 87.920 | 69.591 | 95.688 | 0.00 | 0.00 |
| ATOM | 23461 | CA   | GLU | 1567 | 89.499 | 69.190 | 96.932 | 0.00 | 0.00 |
| ATOM | 23462 | HA   | GLU | 1567 | 89.507 | 69.831 | 97.813 | 0.00 | 0.00 |
| ATOM | 23463 | CB   | GLU | 1567 | 88.684 | 68.004 | 97.325 | 0.00 | 0.00 |
| ATOM | 23464 | HB2  | GLU | 1567 | 88.869 | 67.621 | 98.328 | 0.00 | 0.00 |
| ATOM | 23465 | HB3  | GLU | 1567 | 87.651 | 68.350 | 97.368 | 0.00 | 0.00 |
| ATOM | 23466 | CG   | GLU | 1567 | 88.690 | 66.815 | 96.297 | 0.00 | 0.00 |
| ATOM | 23467 | HG2  | GLU | 1567 | 88.404 | 67.123 | 95.291 | 0.00 | 0.00 |
| ATOM | 23468 | HG3  | GLU | 1567 | 89.701 | 66.412 | 96.250 | 0.00 | 0.00 |
| ATOM | 23469 | CD   | GLU | 1567 | 87.836 | 65.613 | 96.731 | 0.00 | 0.00 |
| ATOM | 23470 | OE1  | GLU | 1567 | 88.305 | 64.436 | 96.754 | 0.00 | 0.00 |
| ATOM | 23471 | OE2  | GLU | 1567 | 86.789 | 65.827 | 97.358 | 0.00 | 0.00 |

|      |       |      |     |      |        |        |        |      |      |
|------|-------|------|-----|------|--------|--------|--------|------|------|
| ATOM | 23472 | C    | GLU | 1567 | 90.910 | 68.854 | 96.550 | 0.00 | 0.00 |
| ATOM | 23473 | O    | GLU | 1567 | 91.821 | 68.920 | 97.363 | 0.00 | 0.00 |
| ATOM | 23474 | N    | ARG | 1568 | 91.234 | 68.833 | 95.222 | 0.00 | 0.00 |
| ATOM | 23475 | H    | ARG | 1568 | 90.520 | 68.907 | 94.512 | 0.00 | 0.00 |
| ATOM | 23476 | CA   | ARG | 1568 | 92.613 | 68.502 | 94.795 | 0.00 | 0.00 |
| ATOM | 23477 | HA   | ARG | 1568 | 92.953 | 67.598 | 95.300 | 0.00 | 0.00 |
| ATOM | 23478 | CB   | ARG | 1568 | 92.544 | 68.061 | 93.307 | 0.00 | 0.00 |
| ATOM | 23479 | HB2  | ARG | 1568 | 91.918 | 68.727 | 92.713 | 0.00 | 0.00 |
| ATOM | 23480 | HB3  | ARG | 1568 | 93.541 | 68.143 | 92.873 | 0.00 | 0.00 |
| ATOM | 23481 | CG   | ARG | 1568 | 92.117 | 66.606 | 93.182 | 0.00 | 0.00 |
| ATOM | 23482 | HG2  | ARG | 1568 | 92.865 | 66.002 | 93.696 | 0.00 | 0.00 |
| ATOM | 23483 | HG3  | ARG | 1568 | 91.212 | 66.431 | 93.762 | 0.00 | 0.00 |
| ATOM | 23484 | CD   | ARG | 1568 | 91.956 | 66.057 | 91.770 | 0.00 | 0.00 |
| ATOM | 23485 | HD2  | ARG | 1568 | 91.761 | 64.986 | 91.831 | 0.00 | 0.00 |
| ATOM | 23486 | HD3  | ARG | 1568 | 91.071 | 66.500 | 91.314 | 0.00 | 0.00 |
| ATOM | 23487 | NE   | ARG | 1568 | 93.196 | 66.168 | 90.978 | 0.00 | 0.00 |
| ATOM | 23488 | HE   | ARG | 1568 | 93.356 | 67.100 | 90.622 | 0.00 | 0.00 |
| ATOM | 23489 | CZ   | ARG | 1568 | 94.122 | 65.249 | 90.640 | 0.00 | 0.00 |
| ATOM | 23490 | NH1  | ARG | 1568 | 94.080 | 64.064 | 91.155 | 0.00 | 0.00 |
| ATOM | 23491 | 1HH1 | ARG | 1568 | 94.778 | 63.369 | 90.931 | 0.00 | 0.00 |
| ATOM | 23492 | 2HH1 | ARG | 1568 | 93.386 | 63.801 | 91.841 | 0.00 | 0.00 |
| ATOM | 23493 | NH2  | ARG | 1568 | 95.141 | 65.453 | 89.856 | 0.00 | 0.00 |
| ATOM | 23494 | 1HH2 | ARG | 1568 | 95.729 | 64.695 | 89.539 | 0.00 | 0.00 |
| ATOM | 23495 | 2HH2 | ARG | 1568 | 95.208 | 66.330 | 89.360 | 0.00 | 0.00 |
| ATOM | 23496 | C    | ARG | 1568 | 93.597 | 69.658 | 94.969 | 0.00 | 0.00 |
| ATOM | 23497 | O    | ARG | 1568 | 94.676 | 69.424 | 95.459 | 0.00 | 0.00 |

|      |       |      |     |      |        |        |        |      |      |
|------|-------|------|-----|------|--------|--------|--------|------|------|
| ATOM | 23498 | N    | ARG | 1569 | 93.089 | 70.848 | 94.737 | 0.00 | 0.00 |
| ATOM | 23499 | H    | ARG | 1569 | 92.094 | 70.811 | 94.571 | 0.00 | 0.00 |
| ATOM | 23500 | CA   | ARG | 1569 | 93.807 | 72.126 | 94.911 | 0.00 | 0.00 |
| ATOM | 23501 | HA   | ARG | 1569 | 94.822 | 72.069 | 94.517 | 0.00 | 0.00 |
| ATOM | 23502 | CB   | ARG | 1569 | 93.036 | 73.261 | 94.299 | 0.00 | 0.00 |
| ATOM | 23503 | HB2  | ARG | 1569 | 91.989 | 73.267 | 94.602 | 0.00 | 0.00 |
| ATOM | 23504 | HB3  | ARG | 1569 | 93.492 | 74.179 | 94.670 | 0.00 | 0.00 |
| ATOM | 23505 | CG   | ARG | 1569 | 93.253 | 73.305 | 92.775 | 0.00 | 0.00 |
| ATOM | 23506 | HG2  | ARG | 1569 | 94.227 | 73.711 | 92.500 | 0.00 | 0.00 |
| ATOM | 23507 | HG3  | ARG | 1569 | 93.230 | 72.287 | 92.386 | 0.00 | 0.00 |
| ATOM | 23508 | CD   | ARG | 1569 | 92.279 | 74.123 | 91.997 | 0.00 | 0.00 |
| ATOM | 23509 | HD2  | ARG | 1569 | 91.289 | 73.667 | 92.027 | 0.00 | 0.00 |
| ATOM | 23510 | HD3  | ARG | 1569 | 92.248 | 75.114 | 92.450 | 0.00 | 0.00 |
| ATOM | 23511 | NE   | ARG | 1569 | 92.564 | 74.121 | 90.556 | 0.00 | 0.00 |
| ATOM | 23512 | HE   | ARG | 1569 | 93.219 | 73.427 | 90.225 | 0.00 | 0.00 |
| ATOM | 23513 | CZ   | ARG | 1569 | 91.974 | 74.942 | 89.655 | 0.00 | 0.00 |
| ATOM | 23514 | NH1  | ARG | 1569 | 92.273 | 74.928 | 88.425 | 0.00 | 0.00 |
| ATOM | 23515 | 1HH1 | ARG | 1569 | 91.919 | 75.588 | 87.747 | 0.00 | 0.00 |
| ATOM | 23516 | 2HH1 | ARG | 1569 | 92.911 | 74.263 | 88.012 | 0.00 | 0.00 |
| ATOM | 23517 | NH2  | ARG | 1569 | 91.113 | 75.901 | 90.078 | 0.00 | 0.00 |
| ATOM | 23518 | 1HH2 | ARG | 1569 | 90.633 | 76.498 | 89.418 | 0.00 | 0.00 |
| ATOM | 23519 | 2HH2 | ARG | 1569 | 90.928 | 75.931 | 91.070 | 0.00 | 0.00 |
| ATOM | 23520 | C    | ARG | 1569 | 94.011 | 72.281 | 96.410 | 0.00 | 0.00 |
| ATOM | 23521 | O    | ARG | 1569 | 95.171 | 72.371 | 96.800 | 0.00 | 0.00 |
| ATOM | 23522 | N    | LEU | 1570 | 92.998 | 72.160 | 97.254 | 0.00 | 0.00 |
| ATOM | 23523 | H    | LEU | 1570 | 92.081 | 72.016 | 96.857 | 0.00 | 0.00 |

|      |       |      |     |      |        |        |         |      |      |
|------|-------|------|-----|------|--------|--------|---------|------|------|
| ATOM | 23524 | CA   | LEU | 1570 | 93.228 | 72.231 | 98.709  | 0.00 | 0.00 |
| ATOM | 23525 | HA   | LEU | 1570 | 93.804 | 73.154 | 98.769  | 0.00 | 0.00 |
| ATOM | 23526 | CB   | LEU | 1570 | 91.879 | 72.305 | 99.533  | 0.00 | 0.00 |
| ATOM | 23527 | HB2  | LEU | 1570 | 91.275 | 73.110 | 99.116  | 0.00 | 0.00 |
| ATOM | 23528 | HB3  | LEU | 1570 | 91.381 | 71.345 | 99.398  | 0.00 | 0.00 |
| ATOM | 23529 | CG   | LEU | 1570 | 91.796 | 72.621 | 101.034 | 0.00 | 0.00 |
| ATOM | 23530 | HG   | LEU | 1570 | 92.246 | 71.799 | 101.590 | 0.00 | 0.00 |
| ATOM | 23531 | CD1  | LEU | 1570 | 92.386 | 73.896 | 101.599 | 0.00 | 0.00 |
| ATOM | 23532 | 1HD1 | LEU | 1570 | 92.338 | 73.745 | 102.678 | 0.00 | 0.00 |
| ATOM | 23533 | 2HD1 | LEU | 1570 | 93.445 | 73.832 | 101.352 | 0.00 | 0.00 |
| ATOM | 23534 | 3HD1 | LEU | 1570 | 91.952 | 74.796 | 101.165 | 0.00 | 0.00 |
| ATOM | 23535 | CD2  | LEU | 1570 | 90.324 | 72.602 | 101.449 | 0.00 | 0.00 |
| ATOM | 23536 | 1HD2 | LEU | 1570 | 89.852 | 71.638 | 101.263 | 0.00 | 0.00 |
| ATOM | 23537 | 2HD2 | LEU | 1570 | 90.331 | 72.835 | 102.513 | 0.00 | 0.00 |
| ATOM | 23538 | 3HD2 | LEU | 1570 | 89.817 | 73.359 | 100.849 | 0.00 | 0.00 |
| ATOM | 23539 | C    | LEU | 1570 | 94.143 | 71.148 | 99.365  | 0.00 | 0.00 |
| ATOM | 23540 | O    | LEU | 1570 | 94.826 | 71.434 | 100.266 | 0.00 | 0.00 |
| ATOM | 23541 | N    | ALA | 1571 | 94.239 | 69.950 | 98.792  | 0.00 | 0.00 |
| ATOM | 23542 | H    | ALA | 1571 | 93.734 | 69.828 | 97.926  | 0.00 | 0.00 |
| ATOM | 23543 | CA   | ALA | 1571 | 95.162 | 68.882 | 99.250  | 0.00 | 0.00 |
| ATOM | 23544 | HA   | ALA | 1571 | 94.909 | 68.754 | 100.302 | 0.00 | 0.00 |
| ATOM | 23545 | CB   | ALA | 1571 | 94.838 | 67.590 | 98.613  | 0.00 | 0.00 |
| ATOM | 23546 | HB1  | ALA | 1571 | 93.782 | 67.410 | 98.811  | 0.00 | 0.00 |
| ATOM | 23547 | HB2  | ALA | 1571 | 95.128 | 67.641 | 97.564  | 0.00 | 0.00 |
| ATOM | 23548 | HB3  | ALA | 1571 | 95.481 | 66.852 | 99.094  | 0.00 | 0.00 |
| ATOM | 23549 | C    | ALA | 1571 | 96.649 | 69.273 | 98.983  | 0.00 | 0.00 |

|      |       |      |     |      |        |        |        |      |      |
|------|-------|------|-----|------|--------|--------|--------|------|------|
| ATOM | 23550 | O    | ALA | 1571 | 97.560 | 68.794 | 99.669 | 0.00 | 0.00 |
| ATOM | 23551 | N    | ARG | 1572 | 96.891 | 70.143 | 97.987 | 0.00 | 0.00 |
| ATOM | 23552 | H    | ARG | 1572 | 96.113 | 70.466 | 97.430 | 0.00 | 0.00 |
| ATOM | 23553 | CA   | ARG | 1572 | 98.225 | 70.697 | 97.733 | 0.00 | 0.00 |
| ATOM | 23554 | HA   | ARG | 1572 | 98.996 | 69.955 | 97.943 | 0.00 | 0.00 |
| ATOM | 23555 | CB   | ARG | 1572 | 98.405 | 71.004 | 96.232 | 0.00 | 0.00 |
| ATOM | 23556 | HB2  | ARG | 1572 | 97.491 | 71.451 | 95.841 | 0.00 | 0.00 |
| ATOM | 23557 | HB3  | ARG | 1572 | 99.293 | 71.602 | 96.028 | 0.00 | 0.00 |
| ATOM | 23558 | CG   | ARG | 1572 | 98.388 | 69.683 | 95.439 | 0.00 | 0.00 |
| ATOM | 23559 | HG2  | ARG | 1572 | 97.396 | 69.251 | 95.563 | 0.00 | 0.00 |
| ATOM | 23560 | HG3  | ARG | 1572 | 99.268 | 69.178 | 95.837 | 0.00 | 0.00 |
| ATOM | 23561 | CD   | ARG | 1572 | 98.721 | 69.802 | 93.950 | 0.00 | 0.00 |
| ATOM | 23562 | HD2  | ARG | 1572 | 99.719 | 70.227 | 93.850 | 0.00 | 0.00 |
| ATOM | 23563 | HD3  | ARG | 1572 | 98.805 | 68.804 | 93.521 | 0.00 | 0.00 |
| ATOM | 23564 | NE   | ARG | 1572 | 97.849 | 70.700 | 93.186 | 0.00 | 0.00 |
| ATOM | 23565 | HE   | ARG | 1572 | 98.136 | 71.658 | 93.049 | 0.00 | 0.00 |
| ATOM | 23566 | CZ   | ARG | 1572 | 96.752 | 70.475 | 92.508 | 0.00 | 0.00 |
| ATOM | 23567 | NH1  | ARG | 1572 | 96.458 | 69.215 | 92.162 | 0.00 | 0.00 |
| ATOM | 23568 | 1HH1 | ARG | 1572 | 95.536 | 68.960 | 91.839 | 0.00 | 0.00 |
| ATOM | 23569 | 2HH1 | ARG | 1572 | 96.932 | 68.424 | 92.575 | 0.00 | 0.00 |
| ATOM | 23570 | NH2  | ARG | 1572 | 96.059 | 71.477 | 92.110 | 0.00 | 0.00 |
| ATOM | 23571 | 1HH2 | ARG | 1572 | 95.337 | 71.282 | 91.431 | 0.00 | 0.00 |
| ATOM | 23572 | 2HH2 | ARG | 1572 | 96.320 | 72.434 | 92.297 | 0.00 | 0.00 |
| ATOM | 23573 | C    | ARG | 1572 | 98.576 | 71.956 | 98.585 | 0.00 | 0.00 |
| ATOM | 23574 | O    | ARG | 1572 | 99.702 | 72.456 | 98.547 | 0.00 | 0.00 |
| ATOM | 23575 | N    | GLY | 1573 | 97.642 | 72.401 | 99.453 | 0.00 | 0.00 |

|      |       |      |     |      |        |        |         |      |      |
|------|-------|------|-----|------|--------|--------|---------|------|------|
| ATOM | 23576 | H    | GLY | 1573 | 96.673 | 72.236 | 99.218  | 0.00 | 0.00 |
| ATOM | 23577 | CA   | GLY | 1573 | 97.931 | 73.407 | 100.464 | 0.00 | 0.00 |
| ATOM | 23578 | HA2  | GLY | 1573 | 97.221 | 73.257 | 101.278 | 0.00 | 0.00 |
| ATOM | 23579 | HA3  | GLY | 1573 | 98.900 | 73.246 | 100.936 | 0.00 | 0.00 |
| ATOM | 23580 | C    | GLY | 1573 | 97.774 | 74.824 | 100.109 | 0.00 | 0.00 |
| ATOM | 23581 | O    | GLY | 1573 | 98.451 | 75.716 | 100.696 | 0.00 | 0.00 |
| ATOM | 23582 | N    | LEU | 1574 | 96.979 | 75.224 | 99.060  | 0.00 | 0.00 |
| ATOM | 23583 | H    | LEU | 1574 | 96.355 | 74.531 | 98.673  | 0.00 | 0.00 |
| ATOM | 23584 | CA   | LEU | 1574 | 96.658 | 76.555 | 98.644  | 0.00 | 0.00 |
| ATOM | 23585 | HA   | LEU | 1574 | 97.241 | 77.248 | 99.251  | 0.00 | 0.00 |
| ATOM | 23586 | CB   | LEU | 1574 | 96.967 | 76.689 | 97.199  | 0.00 | 0.00 |
| ATOM | 23587 | HB2  | LEU | 1574 | 97.262 | 77.710 | 96.958  | 0.00 | 0.00 |
| ATOM | 23588 | HB3  | LEU | 1574 | 97.926 | 76.209 | 97.005  | 0.00 | 0.00 |
| ATOM | 23589 | CG   | LEU | 1574 | 95.867 | 76.057 | 96.279  | 0.00 | 0.00 |
| ATOM | 23590 | HG   | LEU | 1574 | 95.462 | 75.121 | 96.665  | 0.00 | 0.00 |
| ATOM | 23591 | CD1  | LEU | 1574 | 94.701 | 76.968 | 95.807  | 0.00 | 0.00 |
| ATOM | 23592 | 1HD1 | LEU | 1574 | 94.994 | 78.017 | 95.754  | 0.00 | 0.00 |
| ATOM | 23593 | 2HD1 | LEU | 1574 | 94.173 | 76.643 | 94.911  | 0.00 | 0.00 |
| ATOM | 23594 | 3HD1 | LEU | 1574 | 93.966 | 76.964 | 96.612  | 0.00 | 0.00 |
| ATOM | 23595 | CD2  | LEU | 1574 | 96.480 | 75.707 | 94.955  | 0.00 | 0.00 |
| ATOM | 23596 | 1HD2 | LEU | 1574 | 97.018 | 76.573 | 94.571  | 0.00 | 0.00 |
| ATOM | 23597 | 2HD2 | LEU | 1574 | 97.151 | 74.855 | 95.058  | 0.00 | 0.00 |
| ATOM | 23598 | 3HD2 | LEU | 1574 | 95.755 | 75.428 | 94.191  | 0.00 | 0.00 |
| ATOM | 23599 | C    | LEU | 1574 | 95.116 | 76.908 | 98.956  | 0.00 | 0.00 |
| ATOM | 23600 | O    | LEU | 1574 | 94.352 | 75.921 | 99.090  | 0.00 | 0.00 |
| ATOM | 23601 | N    | LYS | 1575 | 94.777 | 78.205 | 99.129  | 0.00 | 0.00 |

|      |       |     |     |      |        |        |         |      |      |
|------|-------|-----|-----|------|--------|--------|---------|------|------|
| ATOM | 23602 | H   | LYS | 1575 | 95.504 | 78.875 | 98.921  | 0.00 | 0.00 |
| ATOM | 23603 | CA  | LYS | 1575 | 93.470 | 78.730 | 99.471  | 0.00 | 0.00 |
| ATOM | 23604 | HA  | LYS | 1575 | 92.977 | 78.066 | 100.181 | 0.00 | 0.00 |
| ATOM | 23605 | CB  | LYS | 1575 | 93.574 | 79.951 | 100.318 | 0.00 | 0.00 |
| ATOM | 23606 | HB2 | LYS | 1575 | 93.699 | 80.818 | 99.669  | 0.00 | 0.00 |
| ATOM | 23607 | HB3 | LYS | 1575 | 92.592 | 80.079 | 100.773 | 0.00 | 0.00 |
| ATOM | 23608 | CG  | LYS | 1575 | 94.600 | 79.640 | 101.497 | 0.00 | 0.00 |
| ATOM | 23609 | HG2 | LYS | 1575 | 94.137 | 78.885 | 102.132 | 0.00 | 0.00 |
| ATOM | 23610 | HG3 | LYS | 1575 | 95.578 | 79.288 | 101.169 | 0.00 | 0.00 |
| ATOM | 23611 | CD  | LYS | 1575 | 94.762 | 81.052 | 102.178 | 0.00 | 0.00 |
| ATOM | 23612 | HD2 | LYS | 1575 | 95.354 | 81.708 | 101.539 | 0.00 | 0.00 |
| ATOM | 23613 | HD3 | LYS | 1575 | 93.739 | 81.417 | 102.268 | 0.00 | 0.00 |
| ATOM | 23614 | CE  | LYS | 1575 | 95.412 | 80.981 | 103.570 | 0.00 | 0.00 |
| ATOM | 23615 | HE2 | LYS | 1575 | 95.063 | 80.081 | 104.076 | 0.00 | 0.00 |
| ATOM | 23616 | HE3 | LYS | 1575 | 96.502 | 80.963 | 103.544 | 0.00 | 0.00 |
| ATOM | 23617 | NZ  | LYS | 1575 | 95.055 | 82.176 | 104.321 | 0.00 | 0.00 |
| ATOM | 23618 | HZ1 | LYS | 1575 | 95.284 | 82.125 | 105.303 | 0.00 | 0.00 |
| ATOM | 23619 | HZ2 | LYS | 1575 | 95.487 | 83.007 | 103.942 | 0.00 | 0.00 |
| ATOM | 23620 | HZ3 | LYS | 1575 | 94.047 | 82.215 | 104.283 | 0.00 | 0.00 |
| ATOM | 23621 | C   | LYS | 1575 | 92.479 | 78.803 | 98.313  | 0.00 | 0.00 |
| ATOM | 23622 | O   | LYS | 1575 | 92.798 | 79.288 | 97.225  | 0.00 | 0.00 |
| ATOM | 23623 | N   | LEU | 1576 | 91.237 | 78.334 | 98.538  | 0.00 | 0.00 |
| ATOM | 23624 | H   | LEU | 1576 | 91.036 | 77.898 | 99.427  | 0.00 | 0.00 |
| ATOM | 23625 | CA  | LEU | 1576 | 90.219 | 78.242 | 97.507  | 0.00 | 0.00 |
| ATOM | 23626 | HA  | LEU | 1576 | 90.767 | 77.908 | 96.626  | 0.00 | 0.00 |
| ATOM | 23627 | CB  | LEU | 1576 | 89.301 | 77.059 | 97.836  | 0.00 | 0.00 |



|      |       |          |      |        |        |        |      |      |
|------|-------|----------|------|--------|--------|--------|------|------|
| ATOM | 23628 | HB2 LEU  | 1576 | 88.899 | 77.395 | 98.792 | 0.00 | 0.00 |
| ATOM | 23629 | HB3 LEU  | 1576 | 88.513 | 77.021 | 97.084 | 0.00 | 0.00 |
| ATOM | 23630 | CG LEU   | 1576 | 89.882 | 75.602 | 97.973 | 0.00 | 0.00 |
| ATOM | 23631 | HG LEU   | 1576 | 90.583 | 75.578 | 98.808 | 0.00 | 0.00 |
| ATOM | 23632 | CD1 LEU  | 1576 | 88.675 | 74.661 | 98.197 | 0.00 | 0.00 |
| ATOM | 23633 | 1HD1 LEU | 1576 | 88.991 | 73.619 | 98.152 | 0.00 | 0.00 |
| ATOM | 23634 | 2HD1 LEU | 1576 | 88.177 | 74.846 | 99.148 | 0.00 | 0.00 |
| ATOM | 23635 | 3HD1 LEU | 1576 | 88.072 | 74.896 | 97.319 | 0.00 | 0.00 |
| ATOM | 23636 | CD2 LEU  | 1576 | 90.731 | 75.158 | 96.729 | 0.00 | 0.00 |
| ATOM | 23637 | 1HD2 LEU | 1576 | 90.050 | 75.081 | 95.881 | 0.00 | 0.00 |
| ATOM | 23638 | 2HD2 LEU | 1576 | 91.512 | 75.886 | 96.509 | 0.00 | 0.00 |
| ATOM | 23639 | 3HD2 LEU | 1576 | 91.325 | 74.250 | 96.833 | 0.00 | 0.00 |
| ATOM | 23640 | C LEU    | 1576 | 89.473 | 79.580 | 97.314 | 0.00 | 0.00 |
| ATOM | 23641 | O LEU    | 1576 | 89.406 | 80.441 | 98.191 | 0.00 | 0.00 |
| ATOM | 23642 | N ASN    | 1577 | 88.940 | 79.761 | 96.127 | 0.00 | 0.00 |
| ATOM | 23643 | H ASN    | 1577 | 89.117 | 78.991 | 95.498 | 0.00 | 0.00 |
| ATOM | 23644 | CA ASN   | 1577 | 88.460 | 80.966 | 95.567 | 0.00 | 0.00 |
| ATOM | 23645 | HA ASN   | 1577 | 88.711 | 81.748 | 96.283 | 0.00 | 0.00 |
| ATOM | 23646 | CB ASN   | 1577 | 89.066 | 81.235 | 94.219 | 0.00 | 0.00 |
| ATOM | 23647 | HB2 ASN  | 1577 | 88.841 | 82.252 | 93.898 | 0.00 | 0.00 |
| ATOM | 23648 | HB3 ASN  | 1577 | 90.141 | 81.054 | 94.213 | 0.00 | 0.00 |
| ATOM | 23649 | CG ASN   | 1577 | 88.560 | 80.290 | 93.076 | 0.00 | 0.00 |
| ATOM | 23650 | OD1 ASN  | 1577 | 87.611 | 79.580 | 93.171 | 0.00 | 0.00 |
| ATOM | 23651 | ND2 ASN  | 1577 | 89.151 | 80.378 | 91.880 | 0.00 | 0.00 |
| ATOM | 23652 | 1HD2 ASN | 1577 | 88.811 | 79.860 | 91.082 | 0.00 | 0.00 |
| ATOM | 23653 | 2HD2 ASN | 1577 | 89.769 | 81.175 | 91.826 | 0.00 | 0.00 |

|      |       |     |     |      |        |        |        |      |      |
|------|-------|-----|-----|------|--------|--------|--------|------|------|
| ATOM | 23654 | C   | ASN | 1577 | 86.909 | 80.921 | 95.596 | 0.00 | 0.00 |
| ATOM | 23655 | O   | ASN | 1577 | 86.238 | 80.005 | 96.111 | 0.00 | 0.00 |
| ATOM | 23656 | N   | TYR | 1578 | 86.300 | 81.947 | 94.977 | 0.00 | 0.00 |
| ATOM | 23657 | H   | TYR | 1578 | 86.850 | 82.610 | 94.449 | 0.00 | 0.00 |
| ATOM | 23658 | CA  | TYR | 1578 | 84.858 | 82.154 | 95.030 | 0.00 | 0.00 |
| ATOM | 23659 | HA  | TYR | 1578 | 84.662 | 82.354 | 96.084 | 0.00 | 0.00 |
| ATOM | 23660 | CB  | TYR | 1578 | 84.516 | 83.414 | 94.223 | 0.00 | 0.00 |
| ATOM | 23661 | HB2 | TYR | 1578 | 85.070 | 84.302 | 94.530 | 0.00 | 0.00 |
| ATOM | 23662 | HB3 | TYR | 1578 | 84.954 | 83.276 | 93.234 | 0.00 | 0.00 |
| ATOM | 23663 | CG  | TYR | 1578 | 83.133 | 83.854 | 94.051 | 0.00 | 0.00 |
| ATOM | 23664 | CD1 | TYR | 1578 | 82.445 | 84.422 | 95.120 | 0.00 | 0.00 |
| ATOM | 23665 | HD1 | TYR | 1578 | 82.913 | 84.525 | 96.088 | 0.00 | 0.00 |
| ATOM | 23666 | CE1 | TYR | 1578 | 81.134 | 84.914 | 94.930 | 0.00 | 0.00 |
| ATOM | 23667 | HE1 | TYR | 1578 | 80.663 | 85.214 | 95.855 | 0.00 | 0.00 |
| ATOM | 23668 | CZ  | TYR | 1578 | 80.478 | 84.741 | 93.648 | 0.00 | 0.00 |
| ATOM | 23669 | OH  | TYR | 1578 | 79.135 | 84.820 | 93.580 | 0.00 | 0.00 |
| ATOM | 23670 | HH  | TYR | 1578 | 78.805 | 85.205 | 94.395 | 0.00 | 0.00 |
| ATOM | 23671 | CE2 | TYR | 1578 | 81.254 | 84.296 | 92.540 | 0.00 | 0.00 |
| ATOM | 23672 | HE2 | TYR | 1578 | 80.880 | 84.333 | 91.527 | 0.00 | 0.00 |
| ATOM | 23673 | CD2 | TYR | 1578 | 82.620 | 83.905 | 92.725 | 0.00 | 0.00 |
| ATOM | 23674 | HD2 | TYR | 1578 | 83.052 | 83.551 | 91.800 | 0.00 | 0.00 |
| ATOM | 23675 | C   | TYR | 1578 | 84.087 | 80.982 | 94.585 | 0.00 | 0.00 |
| ATOM | 23676 | O   | TYR | 1578 | 83.297 | 80.419 | 95.393 | 0.00 | 0.00 |
| ATOM | 23677 | N   | PRO | 1579 | 84.142 | 80.506 | 93.298 | 0.00 | 0.00 |
| ATOM | 23678 | CD  | PRO | 1579 | 85.011 | 80.885 | 92.195 | 0.00 | 0.00 |
| ATOM | 23679 | HD2 | PRO | 1579 | 84.584 | 81.704 | 91.616 | 0.00 | 0.00 |

|      |       |         |      |        |        |        |      |      |
|------|-------|---------|------|--------|--------|--------|------|------|
| ATOM | 23680 | HD3 PRO | 1579 | 86.042 | 81.040 | 92.513 | 0.00 | 0.00 |
| ATOM | 23681 | CG PRO  | 1579 | 84.964 | 79.719 | 91.208 | 0.00 | 0.00 |
| ATOM | 23682 | HG2 PRO | 1579 | 85.004 | 80.062 | 90.174 | 0.00 | 0.00 |
| ATOM | 23683 | HG3 PRO | 1579 | 85.747 | 79.006 | 91.467 | 0.00 | 0.00 |
| ATOM | 23684 | CB PRO  | 1579 | 83.591 | 79.181 | 91.359 | 0.00 | 0.00 |
| ATOM | 23685 | HB2 PRO | 1579 | 82.810 | 79.759 | 90.865 | 0.00 | 0.00 |
| ATOM | 23686 | HB3 PRO | 1579 | 83.547 | 78.138 | 91.045 | 0.00 | 0.00 |
| ATOM | 23687 | CA PRO  | 1579 | 83.435 | 79.315 | 92.865 | 0.00 | 0.00 |
| ATOM | 23688 | HA PRO  | 1579 | 82.369 | 79.454 | 93.048 | 0.00 | 0.00 |
| ATOM | 23689 | C PRO   | 1579 | 83.905 | 78.029 | 93.525 | 0.00 | 0.00 |
| ATOM | 23690 | O PRO   | 1579 | 83.110 | 77.094 | 93.829 | 0.00 | 0.00 |
| ATOM | 23691 | N GLU   | 1580 | 85.190 | 77.913 | 93.838 | 0.00 | 0.00 |
| ATOM | 23692 | H GLU   | 1580 | 85.888 | 78.622 | 93.663 | 0.00 | 0.00 |
| ATOM | 23693 | CA GLU  | 1580 | 85.721 | 76.665 | 94.337 | 0.00 | 0.00 |
| ATOM | 23694 | HA GLU  | 1580 | 85.507 | 75.780 | 93.738 | 0.00 | 0.00 |
| ATOM | 23695 | CB GLU  | 1580 | 87.312 | 76.845 | 94.505 | 0.00 | 0.00 |
| ATOM | 23696 | HB2 GLU | 1580 | 87.452 | 77.823 | 94.967 | 0.00 | 0.00 |
| ATOM | 23697 | HB3 GLU | 1580 | 87.581 | 76.068 | 95.221 | 0.00 | 0.00 |
| ATOM | 23698 | CG GLU  | 1580 | 88.165 | 76.691 | 93.244 | 0.00 | 0.00 |
| ATOM | 23699 | HG2 GLU | 1580 | 88.099 | 75.682 | 92.837 | 0.00 | 0.00 |
| ATOM | 23700 | HG3 GLU | 1580 | 87.800 | 77.367 | 92.470 | 0.00 | 0.00 |
| ATOM | 23701 | CD GLU  | 1580 | 89.640 | 77.151 | 93.424 | 0.00 | 0.00 |
| ATOM | 23702 | OE1 GLU | 1580 | 89.928 | 77.912 | 94.349 | 0.00 | 0.00 |
| ATOM | 23703 | OE2 GLU | 1580 | 90.457 | 76.737 | 92.614 | 0.00 | 0.00 |
| ATOM | 23704 | C GLU   | 1580 | 85.190 | 76.302 | 95.791 | 0.00 | 0.00 |
| ATOM | 23705 | O GLU   | 1580 | 84.778 | 75.154 | 96.035 | 0.00 | 0.00 |

|      |       |      |     |      |        |        |        |      |      |
|------|-------|------|-----|------|--------|--------|--------|------|------|
| ATOM | 23706 | N    | SER | 1581 | 84.989 | 77.300 | 96.592 | 0.00 | 0.00 |
| ATOM | 23707 | H    | SER | 1581 | 85.124 | 78.157 | 96.075 | 0.00 | 0.00 |
| ATOM | 23708 | CA   | SER | 1581 | 84.321 | 77.236 | 97.907 | 0.00 | 0.00 |
| ATOM | 23709 | HA   | SER | 1581 | 84.711 | 76.407 | 98.497 | 0.00 | 0.00 |
| ATOM | 23710 | CB   | SER | 1581 | 84.581 | 78.470 | 98.700 | 0.00 | 0.00 |
| ATOM | 23711 | HB2  | SER | 1581 | 84.138 | 79.347 | 98.227 | 0.00 | 0.00 |
| ATOM | 23712 | HB3  | SER | 1581 | 84.180 | 78.322 | 99.703 | 0.00 | 0.00 |
| ATOM | 23713 | OG   | SER | 1581 | 85.960 | 78.701 | 98.752 | 0.00 | 0.00 |
| ATOM | 23714 | HG   | SER | 1581 | 86.281 | 78.984 | 97.892 | 0.00 | 0.00 |
| ATOM | 23715 | C    | SER | 1581 | 82.825 | 76.897 | 97.849 | 0.00 | 0.00 |
| ATOM | 23716 | O    | SER | 1581 | 82.285 | 76.294 | 98.747 | 0.00 | 0.00 |
| ATOM | 23717 | N    | VAL | 1582 | 82.117 | 77.313 | 96.783 | 0.00 | 0.00 |
| ATOM | 23718 | H    | VAL | 1582 | 82.442 | 77.966 | 96.085 | 0.00 | 0.00 |
| ATOM | 23719 | CA   | VAL | 1582 | 80.735 | 76.845 | 96.576 | 0.00 | 0.00 |
| ATOM | 23720 | HA   | VAL | 1582 | 80.250 | 76.792 | 97.551 | 0.00 | 0.00 |
| ATOM | 23721 | CB   | VAL | 1582 | 79.948 | 77.793 | 95.705 | 0.00 | 0.00 |
| ATOM | 23722 | HB   | VAL | 1582 | 80.511 | 77.994 | 94.794 | 0.00 | 0.00 |
| ATOM | 23723 | CG1  | VAL | 1582 | 78.559 | 77.268 | 95.283 | 0.00 | 0.00 |
| ATOM | 23724 | 1HG1 | VAL | 1582 | 77.992 | 76.776 | 96.074 | 0.00 | 0.00 |
| ATOM | 23725 | 2HG1 | VAL | 1582 | 77.972 | 78.015 | 94.749 | 0.00 | 0.00 |
| ATOM | 23726 | 3HG1 | VAL | 1582 | 78.740 | 76.441 | 94.597 | 0.00 | 0.00 |
| ATOM | 23727 | CG2  | VAL | 1582 | 79.765 | 79.106 | 96.531 | 0.00 | 0.00 |
| ATOM | 23728 | 1HG2 | VAL | 1582 | 79.390 | 78.876 | 97.528 | 0.00 | 0.00 |
| ATOM | 23729 | 2HG2 | VAL | 1582 | 80.715 | 79.634 | 96.614 | 0.00 | 0.00 |
| ATOM | 23730 | 3HG2 | VAL | 1582 | 79.034 | 79.735 | 96.023 | 0.00 | 0.00 |
| ATOM | 23731 | C    | VAL | 1582 | 80.695 | 75.417 | 96.170 | 0.00 | 0.00 |

|      |       |      |     |      |        |        |         |      |      |
|------|-------|------|-----|------|--------|--------|---------|------|------|
| ATOM | 23732 | O    | VAL | 1582 | 79.768 | 74.653 | 96.591  | 0.00 | 0.00 |
| ATOM | 23733 | N    | ALA | 1583 | 81.513 | 74.890 | 95.232  | 0.00 | 0.00 |
| ATOM | 23734 | H    | ALA | 1583 | 82.215 | 75.464 | 94.787  | 0.00 | 0.00 |
| ATOM | 23735 | CA   | ALA | 1583 | 81.434 | 73.537 | 94.752  | 0.00 | 0.00 |
| ATOM | 23736 | HA   | ALA | 1583 | 80.413 | 73.385 | 94.403  | 0.00 | 0.00 |
| ATOM | 23737 | CB   | ALA | 1583 | 82.298 | 73.415 | 93.489  | 0.00 | 0.00 |
| ATOM | 23738 | HB1  | ALA | 1583 | 82.056 | 74.249 | 92.831  | 0.00 | 0.00 |
| ATOM | 23739 | HB2  | ALA | 1583 | 83.378 | 73.498 | 93.616  | 0.00 | 0.00 |
| ATOM | 23740 | HB3  | ALA | 1583 | 82.169 | 72.432 | 93.037  | 0.00 | 0.00 |
| ATOM | 23741 | C    | ALA | 1583 | 81.716 | 72.485 | 95.835  | 0.00 | 0.00 |
| ATOM | 23742 | O    | ALA | 1583 | 81.007 | 71.525 | 95.879  | 0.00 | 0.00 |
| ATOM | 23743 | N    | LEU | 1584 | 82.766 | 72.693 | 96.668  | 0.00 | 0.00 |
| ATOM | 23744 | H    | LEU | 1584 | 83.328 | 73.524 | 96.549  | 0.00 | 0.00 |
| ATOM | 23745 | CA   | LEU | 1584 | 83.110 | 71.627 | 97.578  | 0.00 | 0.00 |
| ATOM | 23746 | HA   | LEU | 1584 | 83.032 | 70.706 | 97.001  | 0.00 | 0.00 |
| ATOM | 23747 | CB   | LEU | 1584 | 84.510 | 71.910 | 98.172  | 0.00 | 0.00 |
| ATOM | 23748 | HB2  | LEU | 1584 | 85.172 | 72.036 | 97.315  | 0.00 | 0.00 |
| ATOM | 23749 | HB3  | LEU | 1584 | 84.382 | 72.852 | 98.706  | 0.00 | 0.00 |
| ATOM | 23750 | CG   | LEU | 1584 | 85.087 | 70.782 | 98.989  | 0.00 | 0.00 |
| ATOM | 23751 | HG   | LEU | 1584 | 84.783 | 69.806 | 98.609  | 0.00 | 0.00 |
| ATOM | 23752 | CD1  | LEU | 1584 | 86.579 | 70.889 | 98.808  | 0.00 | 0.00 |
| ATOM | 23753 | 1HD1 | LEU | 1584 | 86.963 | 70.781 | 97.794  | 0.00 | 0.00 |
| ATOM | 23754 | 2HD1 | LEU | 1584 | 86.811 | 71.858 | 99.249  | 0.00 | 0.00 |
| ATOM | 23755 | 3HD1 | LEU | 1584 | 87.023 | 70.175 | 99.502  | 0.00 | 0.00 |
| ATOM | 23756 | CD2  | LEU | 1584 | 84.809 | 70.997 | 100.465 | 0.00 | 0.00 |
| ATOM | 23757 | 1HD2 | LEU | 1584 | 85.213 | 71.926 | 100.867 | 0.00 | 0.00 |

|      |       |      |     |      |        |        |         |      |      |
|------|-------|------|-----|------|--------|--------|---------|------|------|
| ATOM | 23758 | 2HD2 | LEU | 1584 | 83.752 | 71.053 | 100.725 | 0.00 | 0.00 |
| ATOM | 23759 | 3HD2 | LEU | 1584 | 85.193 | 70.166 | 101.055 | 0.00 | 0.00 |
| ATOM | 23760 | C    | LEU | 1584 | 82.041 | 71.575 | 98.680  | 0.00 | 0.00 |
| ATOM | 23761 | O    | LEU | 1584 | 81.644 | 70.458 | 99.079  | 0.00 | 0.00 |
| ATOM | 23762 | N    | ILE | 1585 | 81.432 | 72.699 | 99.151  | 0.00 | 0.00 |
| ATOM | 23763 | H    | ILE | 1585 | 81.721 | 73.568 | 98.725  | 0.00 | 0.00 |
| ATOM | 23764 | CA   | ILE | 1585 | 80.319 | 72.802 | 100.203 | 0.00 | 0.00 |
| ATOM | 23765 | HA   | ILE | 1585 | 80.564 | 72.169 | 101.055 | 0.00 | 0.00 |
| ATOM | 23766 | CB   | ILE | 1585 | 80.240 | 74.282 | 100.777 | 0.00 | 0.00 |
| ATOM | 23767 | HB   | ILE | 1585 | 79.940 | 74.875 | 99.913  | 0.00 | 0.00 |
| ATOM | 23768 | CG2  | ILE | 1585 | 79.077 | 74.260 | 101.800 | 0.00 | 0.00 |
| ATOM | 23769 | 1HG2 | ILE | 1585 | 78.890 | 75.217 | 102.287 | 0.00 | 0.00 |
| ATOM | 23770 | 2HG2 | ILE | 1585 | 78.169 | 73.946 | 101.286 | 0.00 | 0.00 |
| ATOM | 23771 | 3HG2 | ILE | 1585 | 79.307 | 73.561 | 102.605 | 0.00 | 0.00 |
| ATOM | 23772 | CG1  | ILE | 1585 | 81.614 | 74.563 | 101.433 | 0.00 | 0.00 |
| ATOM | 23773 | 2HG1 | ILE | 1585 | 81.710 | 73.887 | 102.282 | 0.00 | 0.00 |
| ATOM | 23774 | 3HG1 | ILE | 1585 | 82.458 | 74.379 | 100.768 | 0.00 | 0.00 |
| ATOM | 23775 | CD1  | ILE | 1585 | 81.592 | 75.991 | 101.985 | 0.00 | 0.00 |
| ATOM | 23776 | 1HD1 | ILE | 1585 | 81.320 | 76.677 | 101.182 | 0.00 | 0.00 |
| ATOM | 23777 | 2HD1 | ILE | 1585 | 80.919 | 76.058 | 102.840 | 0.00 | 0.00 |
| ATOM | 23778 | 3HD1 | ILE | 1585 | 82.595 | 76.291 | 102.287 | 0.00 | 0.00 |
| ATOM | 23779 | C    | ILE | 1585 | 78.930 | 72.312 | 99.648  | 0.00 | 0.00 |
| ATOM | 23780 | O    | ILE | 1585 | 78.214 | 71.535 | 100.281 | 0.00 | 0.00 |
| ATOM | 23781 | N    | SER | 1586 | 78.505 | 72.718 | 98.423  | 0.00 | 0.00 |
| ATOM | 23782 | H    | SER | 1586 | 79.063 | 73.387 | 97.911  | 0.00 | 0.00 |
| ATOM | 23783 | CA   | SER | 1586 | 77.313 | 72.117 | 97.700  | 0.00 | 0.00 |

|      |       |     |     |      |        |        |         |      |      |
|------|-------|-----|-----|------|--------|--------|---------|------|------|
| ATOM | 23784 | HA  | SER | 1586 | 76.481 | 72.282 | 98.384  | 0.00 | 0.00 |
| ATOM | 23785 | CB  | SER | 1586 | 77.182 | 72.692 | 96.273  | 0.00 | 0.00 |
| ATOM | 23786 | HB2 | SER | 1586 | 78.000 | 72.382 | 95.622  | 0.00 | 0.00 |
| ATOM | 23787 | HB3 | SER | 1586 | 76.271 | 72.185 | 95.953  | 0.00 | 0.00 |
| ATOM | 23788 | OG  | SER | 1586 | 77.140 | 74.033 | 96.418  | 0.00 | 0.00 |
| ATOM | 23789 | HG  | SER | 1586 | 78.020 | 74.416 | 96.426  | 0.00 | 0.00 |
| ATOM | 23790 | C   | SER | 1586 | 77.401 | 70.621 | 97.530  | 0.00 | 0.00 |
| ATOM | 23791 | O   | SER | 1586 | 76.461 | 69.855 | 97.584  | 0.00 | 0.00 |
| ATOM | 23792 | N   | ALA | 1587 | 78.618 | 70.133 | 97.433  | 0.00 | 0.00 |
| ATOM | 23793 | H   | ALA | 1587 | 79.429 | 70.734 | 97.404  | 0.00 | 0.00 |
| ATOM | 23794 | CA  | ALA | 1587 | 78.881 | 68.702 | 97.188  | 0.00 | 0.00 |
| ATOM | 23795 | HA  | ALA | 1587 | 78.182 | 68.262 | 96.478  | 0.00 | 0.00 |
| ATOM | 23796 | CB  | ALA | 1587 | 80.292 | 68.537 | 96.553  | 0.00 | 0.00 |
| ATOM | 23797 | HB1 | ALA | 1587 | 80.693 | 67.550 | 96.782  | 0.00 | 0.00 |
| ATOM | 23798 | HB2 | ALA | 1587 | 80.267 | 68.699 | 95.475  | 0.00 | 0.00 |
| ATOM | 23799 | HB3 | ALA | 1587 | 81.014 | 69.201 | 97.027  | 0.00 | 0.00 |
| ATOM | 23800 | C   | ALA | 1587 | 78.676 | 67.960 | 98.441  | 0.00 | 0.00 |
| ATOM | 23801 | O   | ALA | 1587 | 78.076 | 66.863 | 98.364  | 0.00 | 0.00 |
| ATOM | 23802 | N   | PHE | 1588 | 79.004 | 68.622 | 99.566  | 0.00 | 0.00 |
| ATOM | 23803 | H   | PHE | 1588 | 79.422 | 69.538 | 99.483  | 0.00 | 0.00 |
| ATOM | 23804 | CA  | PHE | 1588 | 78.686 | 68.063 | 100.877 | 0.00 | 0.00 |
| ATOM | 23805 | HA  | PHE | 1588 | 78.938 | 67.014 | 101.031 | 0.00 | 0.00 |
| ATOM | 23806 | CB  | PHE | 1588 | 79.449 | 68.873 | 101.939 | 0.00 | 0.00 |
| ATOM | 23807 | HB2 | PHE | 1588 | 80.507 | 68.654 | 101.798 | 0.00 | 0.00 |
| ATOM | 23808 | HB3 | PHE | 1588 | 79.193 | 69.933 | 101.923 | 0.00 | 0.00 |
| ATOM | 23809 | CG  | PHE | 1588 | 79.203 | 68.406 | 103.397 | 0.00 | 0.00 |

|      |       |      |     |      |        |        |         |      |      |
|------|-------|------|-----|------|--------|--------|---------|------|------|
| ATOM | 23810 | CD1  | PHE | 1588 | 79.866 | 67.287 | 104.024 | 0.00 | 0.00 |
| ATOM | 23811 | HD1  | PHE | 1588 | 80.585 | 66.689 | 103.484 | 0.00 | 0.00 |
| ATOM | 23812 | CE1  | PHE | 1588 | 79.428 | 66.812 | 105.276 | 0.00 | 0.00 |
| ATOM | 23813 | HE1  | PHE | 1588 | 79.982 | 65.989 | 105.702 | 0.00 | 0.00 |
| ATOM | 23814 | CZ   | PHE | 1588 | 78.445 | 67.528 | 105.972 | 0.00 | 0.00 |
| ATOM | 23815 | HZ   | PHE | 1588 | 78.200 | 67.071 | 106.919 | 0.00 | 0.00 |
| ATOM | 23816 | CE2  | PHE | 1588 | 77.808 | 68.627 | 105.373 | 0.00 | 0.00 |
| ATOM | 23817 | HE2  | PHE | 1588 | 77.078 | 69.153 | 105.969 | 0.00 | 0.00 |
| ATOM | 23818 | CD2  | PHE | 1588 | 78.133 | 69.025 | 104.078 | 0.00 | 0.00 |
| ATOM | 23819 | HD2  | PHE | 1588 | 77.500 | 69.754 | 103.593 | 0.00 | 0.00 |
| ATOM | 23820 | C    | PHE | 1588 | 77.194 | 68.099 | 101.091 | 0.00 | 0.00 |
| ATOM | 23821 | O    | PHE | 1588 | 76.645 | 67.226 | 101.808 | 0.00 | 0.00 |
| ATOM | 23822 | N    | ILE | 1589 | 76.430 | 69.082 | 100.516 | 0.00 | 0.00 |
| ATOM | 23823 | H    | ILE | 1589 | 76.938 | 69.848 | 100.098 | 0.00 | 0.00 |
| ATOM | 23824 | CA   | ILE | 1589 | 74.981 | 69.044 | 100.584 | 0.00 | 0.00 |
| ATOM | 23825 | HA   | ILE | 1589 | 74.711 | 68.828 | 101.618 | 0.00 | 0.00 |
| ATOM | 23826 | CB   | ILE | 1589 | 74.381 | 70.407 | 100.281 | 0.00 | 0.00 |
| ATOM | 23827 | HB   | ILE | 1589 | 74.657 | 70.640 | 99.252  | 0.00 | 0.00 |
| ATOM | 23828 | CG2  | ILE | 1589 | 72.853 | 70.398 | 100.303 | 0.00 | 0.00 |
| ATOM | 23829 | 1HG2 | ILE | 1589 | 72.418 | 69.723 | 99.566  | 0.00 | 0.00 |
| ATOM | 23830 | 2HG2 | ILE | 1589 | 72.528 | 70.105 | 101.301 | 0.00 | 0.00 |
| ATOM | 23831 | 3HG2 | ILE | 1589 | 72.393 | 71.328 | 99.971  | 0.00 | 0.00 |
| ATOM | 23832 | CG1  | ILE | 1589 | 74.979 | 71.507 | 101.163 | 0.00 | 0.00 |
| ATOM | 23833 | 2HG1 | ILE | 1589 | 76.058 | 71.642 | 101.089 | 0.00 | 0.00 |
| ATOM | 23834 | 3HG1 | ILE | 1589 | 74.473 | 72.443 | 100.927 | 0.00 | 0.00 |
| ATOM | 23835 | CD1  | ILE | 1589 | 74.579 | 71.392 | 102.660 | 0.00 | 0.00 |



|      |       |      |     |      |        |        |         |      |      |
|------|-------|------|-----|------|--------|--------|---------|------|------|
| ATOM | 23836 | 1HD1 | ILE | 1589 | 74.867 | 70.416 | 103.049 | 0.00 | 0.00 |
| ATOM | 23837 | 2HD1 | ILE | 1589 | 75.064 | 72.208 | 103.196 | 0.00 | 0.00 |
| ATOM | 23838 | 3HD1 | ILE | 1589 | 73.504 | 71.530 | 102.776 | 0.00 | 0.00 |
| ATOM | 23839 | C    | ILE | 1589 | 74.425 | 67.963 | 99.694  | 0.00 | 0.00 |
| ATOM | 23840 | O    | ILE | 1589 | 73.500 | 67.258 | 100.189 | 0.00 | 0.00 |
| ATOM | 23841 | N    | MET | 1590 | 75.000 | 67.644 | 98.534  | 0.00 | 0.00 |
| ATOM | 23842 | H    | MET | 1590 | 75.781 | 68.219 | 98.251  | 0.00 | 0.00 |
| ATOM | 23843 | CA   | MET | 1590 | 74.473 | 66.608 | 97.661  | 0.00 | 0.00 |
| ATOM | 23844 | HA   | MET | 1590 | 73.396 | 66.738 | 97.563  | 0.00 | 0.00 |
| ATOM | 23845 | CB   | MET | 1590 | 75.188 | 66.669 | 96.245  | 0.00 | 0.00 |
| ATOM | 23846 | HB2  | MET | 1590 | 76.254 | 66.638 | 96.473  | 0.00 | 0.00 |
| ATOM | 23847 | HB3  | MET | 1590 | 74.891 | 65.740 | 95.758  | 0.00 | 0.00 |
| ATOM | 23848 | CG   | MET | 1590 | 74.703 | 67.980 | 95.546  | 0.00 | 0.00 |
| ATOM | 23849 | HG2  | MET | 1590 | 73.620 | 68.008 | 95.667  | 0.00 | 0.00 |
| ATOM | 23850 | HG3  | MET | 1590 | 75.131 | 68.901 | 95.940  | 0.00 | 0.00 |
| ATOM | 23851 | SD   | MET | 1590 | 74.831 | 67.964 | 93.710  | 0.00 | 0.00 |
| ATOM | 23852 | CE   | MET | 1590 | 76.654 | 67.816 | 93.660  | 0.00 | 0.00 |
| ATOM | 23853 | HE1  | MET | 1590 | 76.966 | 67.920 | 92.620  | 0.00 | 0.00 |
| ATOM | 23854 | HE2  | MET | 1590 | 77.143 | 68.511 | 94.342  | 0.00 | 0.00 |
| ATOM | 23855 | HE3  | MET | 1590 | 76.866 | 66.818 | 94.043  | 0.00 | 0.00 |
| ATOM | 23856 | C    | MET | 1590 | 74.632 | 65.203 | 98.310  | 0.00 | 0.00 |
| ATOM | 23857 | O    | MET | 1590 | 73.690 | 64.363 | 98.304  | 0.00 | 0.00 |
| ATOM | 23858 | N    | GLU | 1591 | 75.818 | 65.005 | 98.942  | 0.00 | 0.00 |
| ATOM | 23859 | H    | GLU | 1591 | 76.359 | 65.858 | 98.973  | 0.00 | 0.00 |
| ATOM | 23860 | CA   | GLU | 1591 | 76.079 | 63.823 | 99.747  | 0.00 | 0.00 |
| ATOM | 23861 | HA   | GLU | 1591 | 75.810 | 62.930 | 99.183  | 0.00 | 0.00 |

|      |       |     |     |      |        |        |         |      |      |
|------|-------|-----|-----|------|--------|--------|---------|------|------|
| ATOM | 23862 | CB  | GLU | 1591 | 77.569 | 63.726 | 100.186 | 0.00 | 0.00 |
| ATOM | 23863 | HB2 | GLU | 1591 | 78.035 | 64.614 | 100.614 | 0.00 | 0.00 |
| ATOM | 23864 | HB3 | GLU | 1591 | 77.801 | 62.924 | 100.887 | 0.00 | 0.00 |
| ATOM | 23865 | CG  | GLU | 1591 | 78.575 | 63.448 | 99.010  | 0.00 | 0.00 |
| ATOM | 23866 | HG2 | GLU | 1591 | 78.715 | 64.442 | 98.586  | 0.00 | 0.00 |
| ATOM | 23867 | HG3 | GLU | 1591 | 79.500 | 63.253 | 99.552  | 0.00 | 0.00 |
| ATOM | 23868 | CD  | GLU | 1591 | 78.129 | 62.406 | 98.068  | 0.00 | 0.00 |
| ATOM | 23869 | OE1 | GLU | 1591 | 78.013 | 61.183 | 98.321  | 0.00 | 0.00 |
| ATOM | 23870 | OE2 | GLU | 1591 | 77.843 | 62.726 | 96.939  | 0.00 | 0.00 |
| ATOM | 23871 | C   | GLU | 1591 | 75.298 | 63.824 | 101.087 | 0.00 | 0.00 |
| ATOM | 23872 | O   | GLU | 1591 | 74.957 | 62.734 | 101.639 | 0.00 | 0.00 |
| ATOM | 23873 | N   | GLY | 1592 | 75.054 | 64.943 | 101.668 | 0.00 | 0.00 |
| ATOM | 23874 | H   | GLY | 1592 | 75.511 | 65.765 | 101.300 | 0.00 | 0.00 |
| ATOM | 23875 | CA  | GLY | 1592 | 74.232 | 65.080 | 102.820 | 0.00 | 0.00 |
| ATOM | 23876 | HA2 | GLY | 1592 | 74.473 | 64.473 | 103.692 | 0.00 | 0.00 |
| ATOM | 23877 | HA3 | GLY | 1592 | 74.139 | 66.127 | 103.110 | 0.00 | 0.00 |
| ATOM | 23878 | C   | GLY | 1592 | 72.760 | 64.583 | 102.499 | 0.00 | 0.00 |
| ATOM | 23879 | O   | GLY | 1592 | 72.133 | 63.928 | 103.321 | 0.00 | 0.00 |
| ATOM | 23880 | N   | ALA | 1593 | 72.133 | 64.982 | 101.359 | 0.00 | 0.00 |
| ATOM | 23881 | H   | ALA | 1593 | 72.707 | 65.532 | 100.736 | 0.00 | 0.00 |
| ATOM | 23882 | CA  | ALA | 1593 | 70.802 | 64.466 | 100.940 | 0.00 | 0.00 |
| ATOM | 23883 | HA  | ALA | 1593 | 69.985 | 64.682 | 101.627 | 0.00 | 0.00 |
| ATOM | 23884 | CB  | ALA | 1593 | 70.413 | 65.185 | 99.685  | 0.00 | 0.00 |
| ATOM | 23885 | HB1 | ALA | 1593 | 69.358 | 65.039 | 99.456  | 0.00 | 0.00 |
| ATOM | 23886 | HB2 | ALA | 1593 | 70.704 | 66.228 | 99.810  | 0.00 | 0.00 |
| ATOM | 23887 | HB3 | ALA | 1593 | 70.896 | 64.841 | 98.770  | 0.00 | 0.00 |

|      |       |      |     |      |        |        |         |      |      |
|------|-------|------|-----|------|--------|--------|---------|------|------|
| ATOM | 23888 | C    | ALA | 1593 | 70.835 | 62.907 | 100.839 | 0.00 | 0.00 |
| ATOM | 23889 | O    | ALA | 1593 | 69.883 | 62.203 | 101.190 | 0.00 | 0.00 |
| ATOM | 23890 | N    | ARG | 1594 | 71.941 | 62.429 | 100.325 | 0.00 | 0.00 |
| ATOM | 23891 | H    | ARG | 1594 | 72.519 | 63.134 | 99.891  | 0.00 | 0.00 |
| ATOM | 23892 | CA   | ARG | 1594 | 72.169 | 61.024 | 99.990  | 0.00 | 0.00 |
| ATOM | 23893 | HA   | ARG | 1594 | 71.259 | 60.596 | 99.571  | 0.00 | 0.00 |
| ATOM | 23894 | CB   | ARG | 1594 | 73.330 | 60.962 | 99.005  | 0.00 | 0.00 |
| ATOM | 23895 | HB2  | ARG | 1594 | 73.020 | 61.663 | 98.231  | 0.00 | 0.00 |
| ATOM | 23896 | HB3  | ARG | 1594 | 74.158 | 61.505 | 99.459  | 0.00 | 0.00 |
| ATOM | 23897 | CG   | ARG | 1594 | 73.755 | 59.679 | 98.393  | 0.00 | 0.00 |
| ATOM | 23898 | HG2  | ARG | 1594 | 74.705 | 59.679 | 97.859  | 0.00 | 0.00 |
| ATOM | 23899 | HG3  | ARG | 1594 | 73.955 | 59.014 | 99.233  | 0.00 | 0.00 |
| ATOM | 23900 | CD   | ARG | 1594 | 72.650 | 59.243 | 97.318  | 0.00 | 0.00 |
| ATOM | 23901 | HD2  | ARG | 1594 | 71.659 | 59.311 | 97.767  | 0.00 | 0.00 |
| ATOM | 23902 | HD3  | ARG | 1594 | 72.668 | 60.018 | 96.553  | 0.00 | 0.00 |
| ATOM | 23903 | NE   | ARG | 1594 | 72.891 | 57.873 | 96.784  | 0.00 | 0.00 |
| ATOM | 23904 | HE   | ARG | 1594 | 73.362 | 57.691 | 95.910  | 0.00 | 0.00 |
| ATOM | 23905 | CZ   | ARG | 1594 | 72.477 | 56.840 | 97.450  | 0.00 | 0.00 |
| ATOM | 23906 | NH1  | ARG | 1594 | 71.782 | 56.835 | 98.530  | 0.00 | 0.00 |
| ATOM | 23907 | 1HH1 | ARG | 1594 | 71.785 | 56.049 | 99.164  | 0.00 | 0.00 |
| ATOM | 23908 | 2HH1 | ARG | 1594 | 71.238 | 57.649 | 98.779  | 0.00 | 0.00 |
| ATOM | 23909 | NH2  | ARG | 1594 | 72.752 | 55.685 | 96.902  | 0.00 | 0.00 |
| ATOM | 23910 | 1HH2 | ARG | 1594 | 72.636 | 54.757 | 97.284  | 0.00 | 0.00 |
| ATOM | 23911 | 2HH2 | ARG | 1594 | 73.205 | 55.704 | 96.000  | 0.00 | 0.00 |
| ATOM | 23912 | C    | ARG | 1594 | 72.483 | 60.172 | 101.264 | 0.00 | 0.00 |
| ATOM | 23913 | O    | ARG | 1594 | 72.025 | 59.010 | 101.337 | 0.00 | 0.00 |

|      |       |     |     |      |        |        |         |      |      |
|------|-------|-----|-----|------|--------|--------|---------|------|------|
| ATOM | 23914 | N   | ASP | 1595 | 73.237 | 60.729 | 102.217 | 0.00 | 0.00 |
| ATOM | 23915 | H   | ASP | 1595 | 73.763 | 61.577 | 102.061 | 0.00 | 0.00 |
| ATOM | 23916 | CA  | ASP | 1595 | 73.305 | 60.136 | 103.518 | 0.00 | 0.00 |
| ATOM | 23917 | HA  | ASP | 1595 | 73.698 | 59.120 | 103.501 | 0.00 | 0.00 |
| ATOM | 23918 | CB  | ASP | 1595 | 74.338 | 61.001 | 104.272 | 0.00 | 0.00 |
| ATOM | 23919 | HB2 | ASP | 1595 | 75.263 | 60.652 | 103.812 | 0.00 | 0.00 |
| ATOM | 23920 | HB3 | ASP | 1595 | 74.009 | 62.036 | 104.174 | 0.00 | 0.00 |
| ATOM | 23921 | CG  | ASP | 1595 | 74.507 | 60.626 | 105.725 | 0.00 | 0.00 |
| ATOM | 23922 | OD1 | ASP | 1595 | 73.846 | 61.325 | 106.555 | 0.00 | 0.00 |
| ATOM | 23923 | OD2 | ASP | 1595 | 75.281 | 59.719 | 106.091 | 0.00 | 0.00 |
| ATOM | 23924 | C   | ASP | 1595 | 71.968 | 60.034 | 104.277 | 0.00 | 0.00 |
| ATOM | 23925 | O   | ASP | 1595 | 71.708 | 59.022 | 104.926 | 0.00 | 0.00 |
| ATOM | 23926 | N   | GLY | 1596 | 71.129 | 61.036 | 104.139 | 0.00 | 0.00 |
| ATOM | 23927 | H   | GLY | 1596 | 71.529 | 61.907 | 103.820 | 0.00 | 0.00 |
| ATOM | 23928 | CA  | GLY | 1596 | 69.764 | 61.039 | 104.733 | 0.00 | 0.00 |
| ATOM | 23929 | HA2 | GLY | 1596 | 69.092 | 61.274 | 103.908 | 0.00 | 0.00 |
| ATOM | 23930 | HA3 | GLY | 1596 | 69.536 | 60.037 | 105.098 | 0.00 | 0.00 |
| ATOM | 23931 | C   | GLY | 1596 | 69.636 | 61.937 | 105.916 | 0.00 | 0.00 |
| ATOM | 23932 | O   | GLY | 1596 | 68.833 | 61.656 | 106.790 | 0.00 | 0.00 |
| ATOM | 23933 | N   | LYS | 1597 | 70.188 | 63.121 | 105.940 | 0.00 | 0.00 |
| ATOM | 23934 | H   | LYS | 1597 | 70.594 | 63.452 | 105.077 | 0.00 | 0.00 |
| ATOM | 23935 | CA  | LYS | 1597 | 69.860 | 64.138 | 106.912 | 0.00 | 0.00 |
| ATOM | 23936 | HA  | LYS | 1597 | 69.620 | 63.759 | 107.906 | 0.00 | 0.00 |
| ATOM | 23937 | CB  | LYS | 1597 | 71.105 | 65.029 | 107.162 | 0.00 | 0.00 |
| ATOM | 23938 | HB2 | LYS | 1597 | 71.344 | 65.395 | 106.163 | 0.00 | 0.00 |
| ATOM | 23939 | HB3 | LYS | 1597 | 70.884 | 65.881 | 107.805 | 0.00 | 0.00 |

|      |       |     |     |      |        |        |         |      |      |
|------|-------|-----|-----|------|--------|--------|---------|------|------|
| ATOM | 23940 | CG  | LYS | 1597 | 72.328 | 64.339 | 107.828 | 0.00 | 0.00 |
| ATOM | 23941 | HG2 | LYS | 1597 | 72.602 | 63.515 | 107.170 | 0.00 | 0.00 |
| ATOM | 23942 | HG3 | LYS | 1597 | 71.967 | 63.956 | 108.783 | 0.00 | 0.00 |
| ATOM | 23943 | CD  | LYS | 1597 | 73.617 | 65.215 | 108.042 | 0.00 | 0.00 |
| ATOM | 23944 | HD2 | LYS | 1597 | 73.890 | 65.630 | 107.072 | 0.00 | 0.00 |
| ATOM | 23945 | HD3 | LYS | 1597 | 73.381 | 66.091 | 108.647 | 0.00 | 0.00 |
| ATOM | 23946 | CE  | LYS | 1597 | 74.636 | 64.357 | 108.830 | 0.00 | 0.00 |
| ATOM | 23947 | HE2 | LYS | 1597 | 75.460 | 64.988 | 109.162 | 0.00 | 0.00 |
| ATOM | 23948 | HE3 | LYS | 1597 | 74.333 | 63.773 | 109.699 | 0.00 | 0.00 |
| ATOM | 23949 | NZ  | LYS | 1597 | 75.180 | 63.258 | 107.945 | 0.00 | 0.00 |
| ATOM | 23950 | HZ1 | LYS | 1597 | 75.718 | 62.698 | 108.591 | 0.00 | 0.00 |
| ATOM | 23951 | HZ2 | LYS | 1597 | 74.472 | 62.742 | 107.444 | 0.00 | 0.00 |
| ATOM | 23952 | HZ3 | LYS | 1597 | 75.794 | 63.572 | 107.207 | 0.00 | 0.00 |
| ATOM | 23953 | C   | LYS | 1597 | 68.667 | 64.856 | 106.431 | 0.00 | 0.00 |
| ATOM | 23954 | O   | LYS | 1597 | 68.459 | 65.026 | 105.243 | 0.00 | 0.00 |
| ATOM | 23955 | N   | SER | 1598 | 67.832 | 65.399 | 107.324 | 0.00 | 0.00 |
| ATOM | 23956 | H   | SER | 1598 | 68.068 | 65.249 | 108.294 | 0.00 | 0.00 |
| ATOM | 23957 | CA  | SER | 1598 | 66.778 | 66.355 | 107.073 | 0.00 | 0.00 |
| ATOM | 23958 | HA  | SER | 1598 | 66.260 | 65.928 | 106.214 | 0.00 | 0.00 |
| ATOM | 23959 | CB  | SER | 1598 | 65.807 | 66.363 | 108.241 | 0.00 | 0.00 |
| ATOM | 23960 | HB2 | SER | 1598 | 64.847 | 66.697 | 107.849 | 0.00 | 0.00 |
| ATOM | 23961 | HB3 | SER | 1598 | 65.683 | 65.357 | 108.642 | 0.00 | 0.00 |
| ATOM | 23962 | OG  | SER | 1598 | 66.211 | 67.254 | 109.226 | 0.00 | 0.00 |
| ATOM | 23963 | HG  | SER | 1598 | 65.511 | 67.248 | 109.882 | 0.00 | 0.00 |
| ATOM | 23964 | C   | SER | 1598 | 67.195 | 67.661 | 106.545 | 0.00 | 0.00 |
| ATOM | 23965 | O   | SER | 1598 | 68.349 | 68.061 | 106.830 | 0.00 | 0.00 |

|      |       |      |     |      |        |        |         |      |      |
|------|-------|------|-----|------|--------|--------|---------|------|------|
| ATOM | 23966 | N    | VAL | 1599 | 66.365 | 68.406 | 105.816 | 0.00 | 0.00 |
| ATOM | 23967 | H    | VAL | 1599 | 65.502 | 67.919 | 105.616 | 0.00 | 0.00 |
| ATOM | 23968 | CA   | VAL | 1599 | 66.620 | 69.772 | 105.363 | 0.00 | 0.00 |
| ATOM | 23969 | HA   | VAL | 1599 | 67.497 | 69.686 | 104.721 | 0.00 | 0.00 |
| ATOM | 23970 | CB   | VAL | 1599 | 65.566 | 70.402 | 104.458 | 0.00 | 0.00 |
| ATOM | 23971 | HB   | VAL | 1599 | 65.906 | 71.412 | 104.227 | 0.00 | 0.00 |
| ATOM | 23972 | CG1  | VAL | 1599 | 65.464 | 69.750 | 103.046 | 0.00 | 0.00 |
| ATOM | 23973 | 1HG1 | VAL | 1599 | 66.151 | 70.281 | 102.386 | 0.00 | 0.00 |
| ATOM | 23974 | 2HG1 | VAL | 1599 | 65.599 | 68.668 | 103.066 | 0.00 | 0.00 |
| ATOM | 23975 | 3HG1 | VAL | 1599 | 64.450 | 69.922 | 102.687 | 0.00 | 0.00 |
| ATOM | 23976 | CG2  | VAL | 1599 | 64.241 | 70.601 | 105.222 | 0.00 | 0.00 |
| ATOM | 23977 | 1HG2 | VAL | 1599 | 63.724 | 69.650 | 105.346 | 0.00 | 0.00 |
| ATOM | 23978 | 2HG2 | VAL | 1599 | 64.416 | 71.060 | 106.195 | 0.00 | 0.00 |
| ATOM | 23979 | 3HG2 | VAL | 1599 | 63.646 | 71.246 | 104.576 | 0.00 | 0.00 |
| ATOM | 23980 | C    | VAL | 1599 | 67.078 | 70.700 | 106.524 | 0.00 | 0.00 |
| ATOM | 23981 | O    | VAL | 1599 | 67.662 | 71.742 | 106.206 | 0.00 | 0.00 |
| ATOM | 23982 | N    | ALA | 1600 | 66.698 | 70.455 | 107.777 | 0.00 | 0.00 |
| ATOM | 23983 | H    | ALA | 1600 | 65.918 | 69.820 | 107.870 | 0.00 | 0.00 |
| ATOM | 23984 | CA   | ALA | 1600 | 67.103 | 71.231 | 108.934 | 0.00 | 0.00 |
| ATOM | 23985 | HA   | ALA | 1600 | 67.218 | 72.271 | 108.628 | 0.00 | 0.00 |
| ATOM | 23986 | CB   | ALA | 1600 | 65.929 | 71.050 | 109.901 | 0.00 | 0.00 |
| ATOM | 23987 | HB1  | ALA | 1600 | 65.037 | 71.463 | 109.429 | 0.00 | 0.00 |
| ATOM | 23988 | HB2  | ALA | 1600 | 65.774 | 69.971 | 109.898 | 0.00 | 0.00 |
| ATOM | 23989 | HB3  | ALA | 1600 | 66.148 | 71.474 | 110.880 | 0.00 | 0.00 |
| ATOM | 23990 | C    | ALA | 1600 | 68.410 | 70.736 | 109.590 | 0.00 | 0.00 |
| ATOM | 23991 | O    | ALA | 1600 | 69.345 | 71.555 | 109.801 | 0.00 | 0.00 |

|            |      |          |        |        |         |      |      |
|------------|------|----------|--------|--------|---------|------|------|
| ATOM 23992 | N    | SER 1601 | 68.475 | 69.437 | 109.866 | 0.00 | 0.00 |
| ATOM 23993 | H    | SER 1601 | 67.619 | 68.912 | 109.759 | 0.00 | 0.00 |
| ATOM 23994 | CA   | SER 1601 | 69.691 | 68.757 | 110.333 | 0.00 | 0.00 |
| ATOM 23995 | HA   | SER 1601 | 70.054 | 69.156 | 111.281 | 0.00 | 0.00 |
| ATOM 23996 | CB   | SER 1601 | 69.295 | 67.350 | 110.858 | 0.00 | 0.00 |
| ATOM 23997 | HB2  | SER 1601 | 68.887 | 66.838 | 109.986 | 0.00 | 0.00 |
| ATOM 23998 | HB3  | SER 1601 | 70.157 | 66.749 | 111.152 | 0.00 | 0.00 |
| ATOM 23999 | OG   | SER 1601 | 68.397 | 67.413 | 111.972 | 0.00 | 0.00 |
| ATOM 24000 | HG   | SER 1601 | 67.860 | 66.618 | 111.940 | 0.00 | 0.00 |
| ATOM 24001 | C    | SER 1601 | 70.847 | 68.570 | 109.426 | 0.00 | 0.00 |
| ATOM 24002 | O    | SER 1601 | 71.936 | 68.291 | 110.008 | 0.00 | 0.00 |
| ATOM 24003 | N    | LEU 1602 | 70.784 | 68.878 | 108.128 | 0.00 | 0.00 |
| ATOM 24004 | H    | LEU 1602 | 69.854 | 69.094 | 107.798 | 0.00 | 0.00 |
| ATOM 24005 | CA   | LEU 1602 | 71.971 | 69.102 | 107.329 | 0.00 | 0.00 |
| ATOM 24006 | HA   | LEU 1602 | 72.728 | 68.396 | 107.673 | 0.00 | 0.00 |
| ATOM 24007 | CB   | LEU 1602 | 71.642 | 68.678 | 105.862 | 0.00 | 0.00 |
| ATOM 24008 | HB2  | LEU 1602 | 71.330 | 67.634 | 105.859 | 0.00 | 0.00 |
| ATOM 24009 | HB3  | LEU 1602 | 70.804 | 69.237 | 105.445 | 0.00 | 0.00 |
| ATOM 24010 | CG   | LEU 1602 | 72.764 | 68.724 | 104.825 | 0.00 | 0.00 |
| ATOM 24011 | HG   | LEU 1602 | 73.155 | 69.735 | 104.714 | 0.00 | 0.00 |
| ATOM 24012 | CD1  | LEU 1602 | 73.918 | 67.818 | 105.257 | 0.00 | 0.00 |
| ATOM 24013 | 1HD1 | LEU 1602 | 74.400 | 68.045 | 106.208 | 0.00 | 0.00 |
| ATOM 24014 | 2HD1 | LEU 1602 | 73.497 | 66.813 | 105.240 | 0.00 | 0.00 |
| ATOM 24015 | 3HD1 | LEU 1602 | 74.756 | 67.812 | 104.560 | 0.00 | 0.00 |
| ATOM 24016 | CD2  | LEU 1602 | 72.300 | 68.231 | 103.467 | 0.00 | 0.00 |
| ATOM 24017 | 1HD2 | LEU 1602 | 71.423 | 68.798 | 103.155 | 0.00 | 0.00 |

|      |       |      |     |      |        |        |         |      |      |
|------|-------|------|-----|------|--------|--------|---------|------|------|
| ATOM | 24018 | 2HD2 | LEU | 1602 | 73.089 | 68.493 | 102.761 | 0.00 | 0.00 |
| ATOM | 24019 | 3HD2 | LEU | 1602 | 72.171 | 67.150 | 103.520 | 0.00 | 0.00 |
| ATOM | 24020 | C    | LEU | 1602 | 72.580 | 70.480 | 107.266 | 0.00 | 0.00 |
| ATOM | 24021 | O    | LEU | 1602 | 73.780 | 70.614 | 107.114 | 0.00 | 0.00 |
| ATOM | 24022 | N    | MET | 1603 | 71.812 | 71.568 | 107.444 | 0.00 | 0.00 |
| ATOM | 24023 | H    | MET | 1603 | 70.827 | 71.415 | 107.608 | 0.00 | 0.00 |
| ATOM | 24024 | CA   | MET | 1603 | 72.194 | 72.970 | 107.166 | 0.00 | 0.00 |
| ATOM | 24025 | HA   | MET | 1603 | 72.549 | 72.924 | 106.136 | 0.00 | 0.00 |
| ATOM | 24026 | CB   | MET | 1603 | 70.975 | 73.888 | 107.346 | 0.00 | 0.00 |
| ATOM | 24027 | HB2  | MET | 1603 | 70.185 | 73.311 | 106.864 | 0.00 | 0.00 |
| ATOM | 24028 | HB3  | MET | 1603 | 70.637 | 73.970 | 108.379 | 0.00 | 0.00 |
| ATOM | 24029 | CG   | MET | 1603 | 71.028 | 75.318 | 106.760 | 0.00 | 0.00 |
| ATOM | 24030 | HG2  | MET | 1603 | 71.427 | 75.268 | 105.747 | 0.00 | 0.00 |
| ATOM | 24031 | HG3  | MET | 1603 | 69.996 | 75.607 | 106.560 | 0.00 | 0.00 |
| ATOM | 24032 | SD   | MET | 1603 | 72.078 | 76.544 | 107.601 | 0.00 | 0.00 |
| ATOM | 24033 | CE   | MET | 1603 | 70.845 | 77.569 | 108.353 | 0.00 | 0.00 |
| ATOM | 24034 | HE1  | MET | 1603 | 71.392 | 78.324 | 108.918 | 0.00 | 0.00 |
| ATOM | 24035 | HE2  | MET | 1603 | 70.256 | 78.073 | 107.586 | 0.00 | 0.00 |
| ATOM | 24036 | HE3  | MET | 1603 | 70.091 | 77.014 | 108.910 | 0.00 | 0.00 |
| ATOM | 24037 | C    | MET | 1603 | 73.286 | 73.458 | 108.016 | 0.00 | 0.00 |
| ATOM | 24038 | O    | MET | 1603 | 74.205 | 74.074 | 107.523 | 0.00 | 0.00 |
| ATOM | 24039 | N    | GLU | 1604 | 73.233 | 73.070 | 109.289 | 0.00 | 0.00 |
| ATOM | 24040 | H    | GLU | 1604 | 72.455 | 72.508 | 109.602 | 0.00 | 0.00 |
| ATOM | 24041 | CA   | GLU | 1604 | 74.202 | 73.554 | 110.270 | 0.00 | 0.00 |
| ATOM | 24042 | HA   | GLU | 1604 | 74.475 | 74.601 | 110.140 | 0.00 | 0.00 |
| ATOM | 24043 | CB   | GLU | 1604 | 73.619 | 73.557 | 111.681 | 0.00 | 0.00 |



|      |       |     |     |      |        |        |         |      |      |
|------|-------|-----|-----|------|--------|--------|---------|------|------|
| ATOM | 24044 | HB2 | GLU | 1604 | 73.264 | 72.540 | 111.847 | 0.00 | 0.00 |
| ATOM | 24045 | HB3 | GLU | 1604 | 74.418 | 73.861 | 112.357 | 0.00 | 0.00 |
| ATOM | 24046 | CG  | GLU | 1604 | 72.510 | 74.605 | 111.666 | 0.00 | 0.00 |
| ATOM | 24047 | HG2 | GLU | 1604 | 72.853 | 75.603 | 111.394 | 0.00 | 0.00 |
| ATOM | 24048 | HG3 | GLU | 1604 | 71.750 | 74.356 | 110.926 | 0.00 | 0.00 |
| ATOM | 24049 | CD  | GLU | 1604 | 71.963 | 74.669 | 113.129 | 0.00 | 0.00 |
| ATOM | 24050 | OE1 | GLU | 1604 | 71.170 | 73.779 | 113.512 | 0.00 | 0.00 |
| ATOM | 24051 | OE2 | GLU | 1604 | 72.369 | 75.621 | 113.877 | 0.00 | 0.00 |
| ATOM | 24052 | C   | GLU | 1604 | 75.479 | 72.711 | 110.164 | 0.00 | 0.00 |
| ATOM | 24053 | O   | GLU | 1604 | 76.498 | 73.143 | 110.707 | 0.00 | 0.00 |
| ATOM | 24054 | N   | GLU | 1605 | 75.468 | 71.528 | 109.476 | 0.00 | 0.00 |
| ATOM | 24055 | H   | GLU | 1605 | 74.651 | 71.336 | 108.914 | 0.00 | 0.00 |
| ATOM | 24056 | CA  | GLU | 1605 | 76.700 | 70.766 | 109.136 | 0.00 | 0.00 |
| ATOM | 24057 | HA  | GLU | 1605 | 77.394 | 70.802 | 109.976 | 0.00 | 0.00 |
| ATOM | 24058 | CB  | GLU | 1605 | 76.354 | 69.270 | 108.878 | 0.00 | 0.00 |
| ATOM | 24059 | HB2 | GLU | 1605 | 75.628 | 69.170 | 108.071 | 0.00 | 0.00 |
| ATOM | 24060 | HB3 | GLU | 1605 | 77.202 | 68.735 | 108.452 | 0.00 | 0.00 |
| ATOM | 24061 | CG  | GLU | 1605 | 75.827 | 68.504 | 110.074 | 0.00 | 0.00 |
| ATOM | 24062 | HG2 | GLU | 1605 | 74.822 | 68.681 | 110.457 | 0.00 | 0.00 |
| ATOM | 24063 | HG3 | GLU | 1605 | 75.657 | 67.484 | 109.730 | 0.00 | 0.00 |
| ATOM | 24064 | CD  | GLU | 1605 | 76.938 | 68.595 | 111.111 | 0.00 | 0.00 |
| ATOM | 24065 | OE1 | GLU | 1605 | 78.036 | 68.035 | 110.966 | 0.00 | 0.00 |
| ATOM | 24066 | OE2 | GLU | 1605 | 76.758 | 69.336 | 112.099 | 0.00 | 0.00 |
| ATOM | 24067 | C   | GLU | 1605 | 77.472 | 71.381 | 107.956 | 0.00 | 0.00 |
| ATOM | 24068 | O   | GLU | 1605 | 78.692 | 71.301 | 107.825 | 0.00 | 0.00 |
| ATOM | 24069 | N   | GLY | 1606 | 76.691 | 72.169 | 107.124 | 0.00 | 0.00 |

|      |       |      |     |      |        |        |         |      |      |
|------|-------|------|-----|------|--------|--------|---------|------|------|
| ATOM | 24070 | H    | GLY | 1606 | 75.696 | 72.202 | 107.296 | 0.00 | 0.00 |
| ATOM | 24071 | CA   | GLY | 1606 | 77.179 | 72.993 | 106.008 | 0.00 | 0.00 |
| ATOM | 24072 | HA2  | GLY | 1606 | 77.669 | 72.399 | 105.236 | 0.00 | 0.00 |
| ATOM | 24073 | HA3  | GLY | 1606 | 76.314 | 73.417 | 105.496 | 0.00 | 0.00 |
| ATOM | 24074 | C    | GLY | 1606 | 78.196 | 74.071 | 106.317 | 0.00 | 0.00 |
| ATOM | 24075 | O    | GLY | 1606 | 78.900 | 74.492 | 105.366 | 0.00 | 0.00 |
| ATOM | 24076 | N    | ARG | 1607 | 78.441 | 74.356 | 107.594 | 0.00 | 0.00 |
| ATOM | 24077 | H    | ARG | 1607 | 77.961 | 73.782 | 108.273 | 0.00 | 0.00 |
| ATOM | 24078 | CA   | ARG | 1607 | 79.084 | 75.560 | 108.146 | 0.00 | 0.00 |
| ATOM | 24079 | HA   | ARG | 1607 | 79.247 | 76.333 | 107.396 | 0.00 | 0.00 |
| ATOM | 24080 | CB   | ARG | 1607 | 78.255 | 76.165 | 109.300 | 0.00 | 0.00 |
| ATOM | 24081 | HB2  | ARG | 1607 | 78.360 | 75.600 | 110.226 | 0.00 | 0.00 |
| ATOM | 24082 | HB3  | ARG | 1607 | 78.561 | 77.201 | 109.445 | 0.00 | 0.00 |
| ATOM | 24083 | CG   | ARG | 1607 | 76.783 | 76.254 | 108.924 | 0.00 | 0.00 |
| ATOM | 24084 | HG2  | ARG | 1607 | 76.703 | 76.624 | 107.902 | 0.00 | 0.00 |
| ATOM | 24085 | HG3  | ARG | 1607 | 76.465 | 75.214 | 108.860 | 0.00 | 0.00 |
| ATOM | 24086 | CD   | ARG | 1607 | 75.995 | 77.087 | 109.923 | 0.00 | 0.00 |
| ATOM | 24087 | HD2  | ARG | 1607 | 74.949 | 76.790 | 109.853 | 0.00 | 0.00 |
| ATOM | 24088 | HD3  | ARG | 1607 | 76.483 | 76.864 | 110.871 | 0.00 | 0.00 |
| ATOM | 24089 | NE   | ARG | 1607 | 76.095 | 78.533 | 109.713 | 0.00 | 0.00 |
| ATOM | 24090 | HE   | ARG | 1607 | 76.710 | 78.919 | 109.010 | 0.00 | 0.00 |
| ATOM | 24091 | CZ   | ARG | 1607 | 75.401 | 79.419 | 110.437 | 0.00 | 0.00 |
| ATOM | 24092 | NH1  | ARG | 1607 | 74.846 | 79.234 | 111.567 | 0.00 | 0.00 |
| ATOM | 24093 | 1HH1 | ARG | 1607 | 74.531 | 79.992 | 112.155 | 0.00 | 0.00 |
| ATOM | 24094 | 2HH1 | ARG | 1607 | 74.954 | 78.260 | 111.813 | 0.00 | 0.00 |
| ATOM | 24095 | NH2  | ARG | 1607 | 75.304 | 80.665 | 110.049 | 0.00 | 0.00 |

|      |       |      |     |      |        |        |         |      |      |
|------|-------|------|-----|------|--------|--------|---------|------|------|
| ATOM | 24096 | 1HH2 | ARG | 1607 | 74.687 | 81.246 | 110.598 | 0.00 | 0.00 |
| ATOM | 24097 | 2HH2 | ARG | 1607 | 75.524 | 80.872 | 109.085 | 0.00 | 0.00 |
| ATOM | 24098 | C    | ARG | 1607 | 80.475 | 75.212 | 108.593 | 0.00 | 0.00 |
| ATOM | 24099 | O    | ARG | 1607 | 81.168 | 76.149 | 109.014 | 0.00 | 0.00 |
| ATOM | 24100 | N    | HIE | 1608 | 80.863 | 73.965 | 108.615 | 0.00 | 0.00 |
| ATOM | 24101 | H    | HIE | 1608 | 80.102 | 73.336 | 108.400 | 0.00 | 0.00 |
| ATOM | 24102 | CA   | HIE | 1608 | 82.154 | 73.502 | 108.954 | 0.00 | 0.00 |
| ATOM | 24103 | HA   | HIE | 1608 | 82.845 | 74.340 | 109.048 | 0.00 | 0.00 |
| ATOM | 24104 | CB   | HIE | 1608 | 82.185 | 72.869 | 110.292 | 0.00 | 0.00 |
| ATOM | 24105 | HB2  | HIE | 1608 | 81.509 | 72.014 | 110.326 | 0.00 | 0.00 |
| ATOM | 24106 | HB3  | HIE | 1608 | 83.175 | 72.514 | 110.578 | 0.00 | 0.00 |
| ATOM | 24107 | CG   | HIE | 1608 | 81.730 | 73.744 | 111.374 | 0.00 | 0.00 |
| ATOM | 24108 | ND1  | HIE | 1608 | 82.444 | 74.836 | 111.781 | 0.00 | 0.00 |
| ATOM | 24109 | CE1  | HIE | 1608 | 81.611 | 75.446 | 112.668 | 0.00 | 0.00 |
| ATOM | 24110 | HE1  | HIE | 1608 | 81.698 | 76.454 | 113.046 | 0.00 | 0.00 |
| ATOM | 24111 | NE2  | HIE | 1608 | 80.462 | 74.768 | 112.809 | 0.00 | 0.00 |
| ATOM | 24112 | HE2  | HIE | 1608 | 79.738 | 75.076 | 113.442 | 0.00 | 0.00 |
| ATOM | 24113 | CD2  | HIE | 1608 | 80.540 | 73.617 | 112.064 | 0.00 | 0.00 |
| ATOM | 24114 | HD2  | HIE | 1608 | 79.722 | 73.000 | 111.723 | 0.00 | 0.00 |
| ATOM | 24115 | C    | HIE | 1608 | 82.876 | 72.690 | 107.911 | 0.00 | 0.00 |
| ATOM | 24116 | O    | HIE | 1608 | 83.954 | 72.256 | 108.286 | 0.00 | 0.00 |
| ATOM | 24117 | N    | VAL | 1609 | 82.344 | 72.436 | 106.704 | 0.00 | 0.00 |
| ATOM | 24118 | H    | VAL | 1609 | 81.448 | 72.848 | 106.484 | 0.00 | 0.00 |
| ATOM | 24119 | CA   | VAL | 1609 | 82.974 | 71.736 | 105.614 | 0.00 | 0.00 |
| ATOM | 24120 | HA   | VAL | 1609 | 83.241 | 70.757 | 106.013 | 0.00 | 0.00 |
| ATOM | 24121 | CB   | VAL | 1609 | 82.092 | 71.478 | 104.338 | 0.00 | 0.00 |

|      |       |      |     |      |        |        |         |      |      |
|------|-------|------|-----|------|--------|--------|---------|------|------|
| ATOM | 24122 | HB   | VAL | 1609 | 81.821 | 72.383 | 103.795 | 0.00 | 0.00 |
| ATOM | 24123 | CG1  | VAL | 1609 | 82.635 | 70.508 | 103.326 | 0.00 | 0.00 |
| ATOM | 24124 | 1HG1 | VAL | 1609 | 83.546 | 70.879 | 102.857 | 0.00 | 0.00 |
| ATOM | 24125 | 2HG1 | VAL | 1609 | 82.881 | 69.500 | 103.660 | 0.00 | 0.00 |
| ATOM | 24126 | 3HG1 | VAL | 1609 | 81.895 | 70.438 | 102.529 | 0.00 | 0.00 |
| ATOM | 24127 | CG2  | VAL | 1609 | 80.731 | 70.915 | 104.728 | 0.00 | 0.00 |
| ATOM | 24128 | 1HG2 | VAL | 1609 | 80.055 | 70.798 | 103.882 | 0.00 | 0.00 |
| ATOM | 24129 | 2HG2 | VAL | 1609 | 81.026 | 69.961 | 105.164 | 0.00 | 0.00 |
| ATOM | 24130 | 3HG2 | VAL | 1609 | 80.298 | 71.657 | 105.400 | 0.00 | 0.00 |
| ATOM | 24131 | C    | VAL | 1609 | 84.220 | 72.423 | 105.067 | 0.00 | 0.00 |
| ATOM | 24132 | O    | VAL | 1609 | 85.173 | 71.759 | 104.524 | 0.00 | 0.00 |
| ATOM | 24133 | N    | LEU | 1610 | 84.181 | 73.791 | 105.047 | 0.00 | 0.00 |
| ATOM | 24134 | H    | LEU | 1610 | 83.276 | 74.230 | 105.138 | 0.00 | 0.00 |
| ATOM | 24135 | CA   | LEU | 1610 | 85.382 | 74.539 | 104.582 | 0.00 | 0.00 |
| ATOM | 24136 | HA   | LEU | 1610 | 86.312 | 73.972 | 104.552 | 0.00 | 0.00 |
| ATOM | 24137 | CB   | LEU | 1610 | 85.179 | 74.896 | 103.135 | 0.00 | 0.00 |
| ATOM | 24138 | HB2  | LEU | 1610 | 84.769 | 74.101 | 102.512 | 0.00 | 0.00 |
| ATOM | 24139 | HB3  | LEU | 1610 | 84.432 | 75.690 | 103.156 | 0.00 | 0.00 |
| ATOM | 24140 | CG   | LEU | 1610 | 86.428 | 75.364 | 102.301 | 0.00 | 0.00 |
| ATOM | 24141 | HG   | LEU | 1610 | 86.977 | 76.141 | 102.832 | 0.00 | 0.00 |
| ATOM | 24142 | CD1  | LEU | 1610 | 87.463 | 74.320 | 102.220 | 0.00 | 0.00 |
| ATOM | 24143 | 1HD1 | LEU | 1610 | 87.888 | 74.047 | 103.186 | 0.00 | 0.00 |
| ATOM | 24144 | 2HD1 | LEU | 1610 | 87.183 | 73.594 | 101.457 | 0.00 | 0.00 |
| ATOM | 24145 | 3HD1 | LEU | 1610 | 88.341 | 74.675 | 101.679 | 0.00 | 0.00 |
| ATOM | 24146 | CD2  | LEU | 1610 | 86.003 | 75.861 | 100.828 | 0.00 | 0.00 |
| ATOM | 24147 | 1HD2 | LEU | 1610 | 85.852 | 75.031 | 100.139 | 0.00 | 0.00 |

|      |       |      |     |      |        |        |         |      |      |
|------|-------|------|-----|------|--------|--------|---------|------|------|
| ATOM | 24148 | 2HD2 | LEU | 1610 | 85.130 | 76.508 | 100.917 | 0.00 | 0.00 |
| ATOM | 24149 | 3HD2 | LEU | 1610 | 86.792 | 76.512 | 100.449 | 0.00 | 0.00 |
| ATOM | 24150 | C    | LEU | 1610 | 85.551 | 75.724 | 105.496 | 0.00 | 0.00 |
| ATOM | 24151 | O    | LEU | 1610 | 84.585 | 76.459 | 105.710 | 0.00 | 0.00 |
| ATOM | 24152 | N    | THR | 1611 | 86.730 | 75.851 | 106.090 | 0.00 | 0.00 |
| ATOM | 24153 | H    | THR | 1611 | 87.521 | 75.307 | 105.778 | 0.00 | 0.00 |
| ATOM | 24154 | CA   | THR | 1611 | 86.909 | 76.726 | 107.235 | 0.00 | 0.00 |
| ATOM | 24155 | HA   | THR | 1611 | 85.957 | 77.177 | 107.516 | 0.00 | 0.00 |
| ATOM | 24156 | CB   | THR | 1611 | 87.582 | 76.098 | 108.495 | 0.00 | 0.00 |
| ATOM | 24157 | HB   | THR | 1611 | 87.586 | 76.928 | 109.202 | 0.00 | 0.00 |
| ATOM | 24158 | CG2  | THR | 1611 | 86.588 | 75.134 | 109.065 | 0.00 | 0.00 |
| ATOM | 24159 | 1HG2 | THR | 1611 | 85.833 | 75.778 | 109.515 | 0.00 | 0.00 |
| ATOM | 24160 | 2HG2 | THR | 1611 | 85.981 | 74.575 | 108.352 | 0.00 | 0.00 |
| ATOM | 24161 | 3HG2 | THR | 1611 | 87.144 | 74.525 | 109.779 | 0.00 | 0.00 |
| ATOM | 24162 | OG1  | THR | 1611 | 88.859 | 75.400 | 108.466 | 0.00 | 0.00 |
| ATOM | 24163 | HG1  | THR | 1611 | 88.802 | 74.763 | 107.751 | 0.00 | 0.00 |
| ATOM | 24164 | C    | THR | 1611 | 87.738 | 77.915 | 106.810 | 0.00 | 0.00 |
| ATOM | 24165 | O    | THR | 1611 | 88.431 | 77.894 | 105.777 | 0.00 | 0.00 |
| ATOM | 24166 | N    | ARG | 1612 | 87.686 | 79.015 | 107.537 | 0.00 | 0.00 |
| ATOM | 24167 | H    | ARG | 1612 | 87.113 | 79.086 | 108.366 | 0.00 | 0.00 |
| ATOM | 24168 | CA   | ARG | 1612 | 88.146 | 80.323 | 106.965 | 0.00 | 0.00 |
| ATOM | 24169 | HA   | ARG | 1612 | 87.746 | 80.342 | 105.951 | 0.00 | 0.00 |
| ATOM | 24170 | CB   | ARG | 1612 | 87.448 | 81.401 | 107.830 | 0.00 | 0.00 |
| ATOM | 24171 | HB2  | ARG | 1612 | 86.396 | 81.497 | 107.561 | 0.00 | 0.00 |
| ATOM | 24172 | HB3  | ARG | 1612 | 87.433 | 80.971 | 108.832 | 0.00 | 0.00 |
| ATOM | 24173 | CG   | ARG | 1612 | 88.143 | 82.771 | 107.791 | 0.00 | 0.00 |

|      |       |      |     |      |        |        |         |      |      |
|------|-------|------|-----|------|--------|--------|---------|------|------|
| ATOM | 24174 | HG2  | ARG | 1612 | 89.165 | 82.639 | 108.146 | 0.00 | 0.00 |
| ATOM | 24175 | HG3  | ARG | 1612 | 88.157 | 83.153 | 106.770 | 0.00 | 0.00 |
| ATOM | 24176 | CD   | ARG | 1612 | 87.518 | 83.709 | 108.808 | 0.00 | 0.00 |
| ATOM | 24177 | HD2  | ARG | 1612 | 87.519 | 83.279 | 109.810 | 0.00 | 0.00 |
| ATOM | 24178 | HD3  | ARG | 1612 | 87.961 | 84.705 | 108.827 | 0.00 | 0.00 |
| ATOM | 24179 | NE   | ARG | 1612 | 86.087 | 83.843 | 108.570 | 0.00 | 0.00 |
| ATOM | 24180 | HE   | ARG | 1612 | 85.461 | 83.130 | 108.916 | 0.00 | 0.00 |
| ATOM | 24181 | CZ   | ARG | 1612 | 85.420 | 84.880 | 108.057 | 0.00 | 0.00 |
| ATOM | 24182 | NH1  | ARG | 1612 | 85.947 | 85.964 | 107.537 | 0.00 | 0.00 |
| ATOM | 24183 | 1HH1 | ARG | 1612 | 85.364 | 86.598 | 107.010 | 0.00 | 0.00 |
| ATOM | 24184 | 2HH1 | ARG | 1612 | 86.916 | 85.897 | 107.261 | 0.00 | 0.00 |
| ATOM | 24185 | NH2  | ARG | 1612 | 84.093 | 84.867 | 108.137 | 0.00 | 0.00 |
| ATOM | 24186 | 1HH2 | ARG | 1612 | 83.617 | 85.666 | 107.744 | 0.00 | 0.00 |
| ATOM | 24187 | 2HH2 | ARG | 1612 | 83.701 | 84.226 | 108.811 | 0.00 | 0.00 |
| ATOM | 24188 | C    | ARG | 1612 | 89.696 | 80.510 | 106.780 | 0.00 | 0.00 |
| ATOM | 24189 | O    | ARG | 1612 | 90.245 | 81.404 | 106.177 | 0.00 | 0.00 |
| ATOM | 24190 | N    | GLU | 1613 | 90.391 | 79.522 | 107.374 | 0.00 | 0.00 |
| ATOM | 24191 | H    | GLU | 1613 | 89.923 | 78.809 | 107.915 | 0.00 | 0.00 |
| ATOM | 24192 | CA   | GLU | 1613 | 91.822 | 79.398 | 107.171 | 0.00 | 0.00 |
| ATOM | 24193 | HA   | GLU | 1613 | 92.218 | 80.413 | 107.149 | 0.00 | 0.00 |
| ATOM | 24194 | CB   | GLU | 1613 | 92.513 | 78.755 | 108.344 | 0.00 | 0.00 |
| ATOM | 24195 | HB2  | GLU | 1613 | 93.587 | 78.872 | 108.195 | 0.00 | 0.00 |
| ATOM | 24196 | HB3  | GLU | 1613 | 92.277 | 79.266 | 109.278 | 0.00 | 0.00 |
| ATOM | 24197 | CG   | GLU | 1613 | 92.147 | 77.223 | 108.444 | 0.00 | 0.00 |
| ATOM | 24198 | HG2  | GLU | 1613 | 91.085 | 77.032 | 108.290 | 0.00 | 0.00 |
| ATOM | 24199 | HG3  | GLU | 1613 | 92.683 | 76.805 | 107.591 | 0.00 | 0.00 |

|      |       |      |     |      |        |        |         |      |      |
|------|-------|------|-----|------|--------|--------|---------|------|------|
| ATOM | 24200 | CD   | GLU | 1613 | 92.487 | 76.768 | 109.866 | 0.00 | 0.00 |
| ATOM | 24201 | OE1  | GLU | 1613 | 91.808 | 77.096 | 110.887 | 0.00 | 0.00 |
| ATOM | 24202 | OE2  | GLU | 1613 | 93.536 | 76.072 | 110.004 | 0.00 | 0.00 |
| ATOM | 24203 | C    | GLU | 1613 | 92.158 | 78.841 | 105.776 | 0.00 | 0.00 |
| ATOM | 24204 | O    | GLU | 1613 | 93.297 | 78.539 | 105.445 | 0.00 | 0.00 |
| ATOM | 24205 | N    | GLN | 1614 | 91.209 | 78.525 | 104.945 | 0.00 | 0.00 |
| ATOM | 24206 | H    | GLN | 1614 | 90.239 | 78.661 | 105.191 | 0.00 | 0.00 |
| ATOM | 24207 | CA   | GLN | 1614 | 91.382 | 77.664 | 103.748 | 0.00 | 0.00 |
| ATOM | 24208 | HA   | GLN | 1614 | 92.459 | 77.575 | 103.611 | 0.00 | 0.00 |
| ATOM | 24209 | CB   | GLN | 1614 | 90.627 | 76.319 | 103.982 | 0.00 | 0.00 |
| ATOM | 24210 | HB2  | GLN | 1614 | 89.546 | 76.452 | 104.027 | 0.00 | 0.00 |
| ATOM | 24211 | HB3  | GLN | 1614 | 90.862 | 75.635 | 103.167 | 0.00 | 0.00 |
| ATOM | 24212 | CG   | GLN | 1614 | 91.037 | 75.531 | 105.261 | 0.00 | 0.00 |
| ATOM | 24213 | HG2  | GLN | 1614 | 92.110 | 75.352 | 105.178 | 0.00 | 0.00 |
| ATOM | 24214 | HG3  | GLN | 1614 | 91.041 | 76.222 | 106.104 | 0.00 | 0.00 |
| ATOM | 24215 | CD   | GLN | 1614 | 90.166 | 74.276 | 105.497 | 0.00 | 0.00 |
| ATOM | 24216 | OE1  | GLN | 1614 | 89.016 | 74.365 | 106.029 | 0.00 | 0.00 |
| ATOM | 24217 | NE2  | GLN | 1614 | 90.583 | 73.077 | 105.080 | 0.00 | 0.00 |
| ATOM | 24218 | 1HE2 | GLN | 1614 | 89.917 | 72.338 | 104.910 | 0.00 | 0.00 |
| ATOM | 24219 | 2HE2 | GLN | 1614 | 91.527 | 72.961 | 104.740 | 0.00 | 0.00 |
| ATOM | 24220 | C    | GLN | 1614 | 90.936 | 78.384 | 102.527 | 0.00 | 0.00 |
| ATOM | 24221 | O    | GLN | 1614 | 90.889 | 77.741 | 101.463 | 0.00 | 0.00 |
| ATOM | 24222 | N    | VAL | 1615 | 90.488 | 79.649 | 102.625 | 0.00 | 0.00 |
| ATOM | 24223 | H    | VAL | 1615 | 90.571 | 80.196 | 103.470 | 0.00 | 0.00 |
| ATOM | 24224 | CA   | VAL | 1615 | 89.878 | 80.385 | 101.501 | 0.00 | 0.00 |
| ATOM | 24225 | HA   | VAL | 1615 | 90.118 | 79.932 | 100.539 | 0.00 | 0.00 |

|      |       |      |     |      |        |        |         |      |      |
|------|-------|------|-----|------|--------|--------|---------|------|------|
| ATOM | 24226 | CB   | VAL | 1615 | 88.351 | 80.502 | 101.637 | 0.00 | 0.00 |
| ATOM | 24227 | HB   | VAL | 1615 | 87.964 | 81.077 | 100.796 | 0.00 | 0.00 |
| ATOM | 24228 | CG1  | VAL | 1615 | 87.714 | 79.086 | 101.555 | 0.00 | 0.00 |
| ATOM | 24229 | 1HG1 | VAL | 1615 | 88.119 | 78.369 | 102.269 | 0.00 | 0.00 |
| ATOM | 24230 | 2HG1 | VAL | 1615 | 86.631 | 79.141 | 101.667 | 0.00 | 0.00 |
| ATOM | 24231 | 3HG1 | VAL | 1615 | 87.885 | 78.817 | 100.513 | 0.00 | 0.00 |
| ATOM | 24232 | CG2  | VAL | 1615 | 87.754 | 81.284 | 102.757 | 0.00 | 0.00 |
| ATOM | 24233 | 1HG2 | VAL | 1615 | 86.705 | 81.448 | 102.508 | 0.00 | 0.00 |
| ATOM | 24234 | 2HG2 | VAL | 1615 | 87.940 | 80.698 | 103.657 | 0.00 | 0.00 |
| ATOM | 24235 | 3HG2 | VAL | 1615 | 88.213 | 82.262 | 102.901 | 0.00 | 0.00 |
| ATOM | 24236 | C    | VAL | 1615 | 90.452 | 81.809 | 101.334 | 0.00 | 0.00 |
| ATOM | 24237 | O    | VAL | 1615 | 91.068 | 82.321 | 102.276 | 0.00 | 0.00 |
| ATOM | 24238 | N    | MET | 1616 | 90.434 | 82.321 | 100.102 | 0.00 | 0.00 |
| ATOM | 24239 | H    | MET | 1616 | 89.944 | 81.781 | 99.403  | 0.00 | 0.00 |
| ATOM | 24240 | CA   | MET | 1616 | 91.172 | 83.499 | 99.778  | 0.00 | 0.00 |
| ATOM | 24241 | HA   | MET | 1616 | 92.207 | 83.358 | 100.091 | 0.00 | 0.00 |
| ATOM | 24242 | CB   | MET | 1616 | 91.165 | 83.686 | 98.213  | 0.00 | 0.00 |
| ATOM | 24243 | HB2  | MET | 1616 | 90.152 | 83.686 | 97.811  | 0.00 | 0.00 |
| ATOM | 24244 | HB3  | MET | 1616 | 91.544 | 84.674 | 97.952  | 0.00 | 0.00 |
| ATOM | 24245 | CG   | MET | 1616 | 91.946 | 82.624 | 97.528  | 0.00 | 0.00 |
| ATOM | 24246 | HG2  | MET | 1616 | 92.985 | 82.662 | 97.858  | 0.00 | 0.00 |
| ATOM | 24247 | HG3  | MET | 1616 | 91.529 | 81.647 | 97.772  | 0.00 | 0.00 |
| ATOM | 24248 | SD   | MET | 1616 | 91.779 | 82.792 | 95.738  | 0.00 | 0.00 |
| ATOM | 24249 | CE   | MET | 1616 | 93.396 | 83.671 | 95.348  | 0.00 | 0.00 |
| ATOM | 24250 | HE1  | MET | 1616 | 93.789 | 83.524 | 94.342  | 0.00 | 0.00 |
| ATOM | 24251 | HE2  | MET | 1616 | 93.199 | 84.726 | 95.539  | 0.00 | 0.00 |



|      |       |     |     |      |        |        |         |      |      |
|------|-------|-----|-----|------|--------|--------|---------|------|------|
| ATOM | 24252 | HE3 | MET | 1616 | 94.237 | 83.253 | 95.901  | 0.00 | 0.00 |
| ATOM | 24253 | C   | MET | 1616 | 90.616 | 84.754 | 100.509 | 0.00 | 0.00 |
| ATOM | 24254 | O   | MET | 1616 | 89.425 | 84.906 | 100.790 | 0.00 | 0.00 |
| ATOM | 24255 | N   | GLU | 1617 | 91.432 | 85.803 | 100.684 | 0.00 | 0.00 |
| ATOM | 24256 | H   | GLU | 1617 | 92.386 | 85.720 | 100.363 | 0.00 | 0.00 |
| ATOM | 24257 | CA  | GLU | 1617 | 91.022 | 87.090 | 101.410 | 0.00 | 0.00 |
| ATOM | 24258 | HA  | GLU | 1617 | 90.713 | 86.870 | 102.432 | 0.00 | 0.00 |
| ATOM | 24259 | CB  | GLU | 1617 | 92.217 | 88.016 | 101.366 | 0.00 | 0.00 |
| ATOM | 24260 | HB2 | GLU | 1617 | 93.017 | 87.640 | 102.004 | 0.00 | 0.00 |
| ATOM | 24261 | HB3 | GLU | 1617 | 92.566 | 87.871 | 100.344 | 0.00 | 0.00 |
| ATOM | 24262 | CG  | GLU | 1617 | 92.062 | 89.548 | 101.667 | 0.00 | 0.00 |
| ATOM | 24263 | HG2 | GLU | 1617 | 93.001 | 90.039 | 101.413 | 0.00 | 0.00 |
| ATOM | 24264 | HG3 | GLU | 1617 | 91.317 | 89.961 | 100.986 | 0.00 | 0.00 |
| ATOM | 24265 | CD  | GLU | 1617 | 91.751 | 89.878 | 103.143 | 0.00 | 0.00 |
| ATOM | 24266 | OE1 | GLU | 1617 | 90.595 | 89.673 | 103.597 | 0.00 | 0.00 |
| ATOM | 24267 | OE2 | GLU | 1617 | 92.688 | 90.315 | 103.868 | 0.00 | 0.00 |
| ATOM | 24268 | C   | GLU | 1617 | 89.724 | 87.635 | 100.766 | 0.00 | 0.00 |
| ATOM | 24269 | O   | GLU | 1617 | 89.581 | 87.700 | 99.558  | 0.00 | 0.00 |
| ATOM | 24270 | N   | GLY | 1618 | 88.753 | 88.165 | 101.560 | 0.00 | 0.00 |
| ATOM | 24271 | H   | GLY | 1618 | 88.892 | 87.992 | 102.545 | 0.00 | 0.00 |
| ATOM | 24272 | CA  | GLY | 1618 | 87.410 | 88.619 | 101.127 | 0.00 | 0.00 |
| ATOM | 24273 | HA2 | GLY | 1618 | 86.953 | 89.379 | 101.761 | 0.00 | 0.00 |
| ATOM | 24274 | HA3 | GLY | 1618 | 87.382 | 89.074 | 100.137 | 0.00 | 0.00 |
| ATOM | 24275 | C   | GLY | 1618 | 86.424 | 87.457 | 100.940 | 0.00 | 0.00 |
| ATOM | 24276 | O   | GLY | 1618 | 85.248 | 87.695 | 101.178 | 0.00 | 0.00 |
| ATOM | 24277 | N   | VAL | 1619 | 86.869 | 86.242 | 100.622 | 0.00 | 0.00 |

|      |       |      |     |      |        |        |         |      |      |
|------|-------|------|-----|------|--------|--------|---------|------|------|
| ATOM | 24278 | H    | VAL | 1619 | 87.852 | 86.119 | 100.424 | 0.00 | 0.00 |
| ATOM | 24279 | CA   | VAL | 1619 | 85.981 | 85.210 | 100.012 | 0.00 | 0.00 |
| ATOM | 24280 | HA   | VAL | 1619 | 85.340 | 85.643 | 99.245  | 0.00 | 0.00 |
| ATOM | 24281 | CB   | VAL | 1619 | 86.722 | 84.023 | 99.372  | 0.00 | 0.00 |
| ATOM | 24282 | HB   | VAL | 1619 | 87.380 | 83.683 | 100.172 | 0.00 | 0.00 |
| ATOM | 24283 | CG1  | VAL | 1619 | 85.781 | 82.884 | 99.021  | 0.00 | 0.00 |
| ATOM | 24284 | 1HG1 | VAL | 1619 | 86.352 | 82.036 | 98.642  | 0.00 | 0.00 |
| ATOM | 24285 | 2HG1 | VAL | 1619 | 85.273 | 82.515 | 99.912  | 0.00 | 0.00 |
| ATOM | 24286 | 3HG1 | VAL | 1619 | 85.097 | 83.084 | 98.197  | 0.00 | 0.00 |
| ATOM | 24287 | CG2  | VAL | 1619 | 87.409 | 84.489 | 98.038  | 0.00 | 0.00 |
| ATOM | 24288 | 1HG2 | VAL | 1619 | 88.109 | 85.306 | 98.215  | 0.00 | 0.00 |
| ATOM | 24289 | 2HG2 | VAL | 1619 | 87.863 | 83.557 | 97.702  | 0.00 | 0.00 |
| ATOM | 24290 | 3HG2 | VAL | 1619 | 86.732 | 84.781 | 97.235  | 0.00 | 0.00 |
| ATOM | 24291 | C    | VAL | 1619 | 84.764 | 84.870 | 100.899 | 0.00 | 0.00 |
| ATOM | 24292 | O    | VAL | 1619 | 83.612 | 84.914 | 100.448 | 0.00 | 0.00 |
| ATOM | 24293 | N    | PRO | 1620 | 84.985 | 84.669 | 102.224 | 0.00 | 0.00 |
| ATOM | 24294 | CD   | PRO | 1620 | 86.220 | 84.690 | 103.024 | 0.00 | 0.00 |
| ATOM | 24295 | HD2  | PRO | 1620 | 87.021 | 84.190 | 102.478 | 0.00 | 0.00 |
| ATOM | 24296 | HD3  | PRO | 1620 | 86.425 | 85.755 | 103.125 | 0.00 | 0.00 |
| ATOM | 24297 | CG   | PRO | 1620 | 86.020 | 84.015 | 104.379 | 0.00 | 0.00 |
| ATOM | 24298 | HG2  | PRO | 1620 | 86.273 | 82.955 | 104.356 | 0.00 | 0.00 |
| ATOM | 24299 | HG3  | PRO | 1620 | 86.455 | 84.576 | 105.205 | 0.00 | 0.00 |
| ATOM | 24300 | CB   | PRO | 1620 | 84.567 | 84.248 | 104.472 | 0.00 | 0.00 |
| ATOM | 24301 | HB2  | PRO | 1620 | 84.185 | 83.353 | 104.962 | 0.00 | 0.00 |
| ATOM | 24302 | HB3  | PRO | 1620 | 84.340 | 85.110 | 105.099 | 0.00 | 0.00 |
| ATOM | 24303 | CA   | PRO | 1620 | 83.865 | 84.387 | 103.143 | 0.00 | 0.00 |

|      |       |     |     |      |        |        |         |      |      |
|------|-------|-----|-----|------|--------|--------|---------|------|------|
| ATOM | 24304 | HA  | PRO | 1620 | 83.449 | 83.400 | 102.943 | 0.00 | 0.00 |
| ATOM | 24305 | C   | PRO | 1620 | 82.695 | 85.345 | 103.259 | 0.00 | 0.00 |
| ATOM | 24306 | O   | PRO | 1620 | 81.581 | 84.860 | 103.291 | 0.00 | 0.00 |
| ATOM | 24307 | N   | GLU | 1621 | 82.941 | 86.644 | 103.196 | 0.00 | 0.00 |
| ATOM | 24308 | H   | GLU | 1621 | 83.873 | 87.032 | 103.156 | 0.00 | 0.00 |
| ATOM | 24309 | CA  | GLU | 1621 | 81.842 | 87.724 | 103.225 | 0.00 | 0.00 |
| ATOM | 24310 | HA  | GLU | 1621 | 81.056 | 87.376 | 103.896 | 0.00 | 0.00 |
| ATOM | 24311 | CB  | GLU | 1621 | 82.439 | 88.992 | 103.865 | 0.00 | 0.00 |
| ATOM | 24312 | HB2 | GLU | 1621 | 83.455 | 89.148 | 103.500 | 0.00 | 0.00 |
| ATOM | 24313 | HB3 | GLU | 1621 | 81.722 | 89.767 | 103.595 | 0.00 | 0.00 |
| ATOM | 24314 | CG  | GLU | 1621 | 82.516 | 88.901 | 105.385 | 0.00 | 0.00 |
| ATOM | 24315 | HG2 | GLU | 1621 | 82.963 | 89.841 | 105.708 | 0.00 | 0.00 |
| ATOM | 24316 | HG3 | GLU | 1621 | 81.523 | 88.791 | 105.821 | 0.00 | 0.00 |
| ATOM | 24317 | CD  | GLU | 1621 | 83.350 | 87.760 | 105.944 | 0.00 | 0.00 |
| ATOM | 24318 | OE1 | GLU | 1621 | 82.884 | 86.924 | 106.742 | 0.00 | 0.00 |
| ATOM | 24319 | OE2 | GLU | 1621 | 84.531 | 87.688 | 105.551 | 0.00 | 0.00 |
| ATOM | 24320 | C   | GLU | 1621 | 81.301 | 88.027 | 101.835 | 0.00 | 0.00 |
| ATOM | 24321 | O   | GLU | 1621 | 80.219 | 88.474 | 101.645 | 0.00 | 0.00 |
| ATOM | 24322 | N   | MET | 1622 | 82.020 | 87.600 | 100.793 | 0.00 | 0.00 |
| ATOM | 24323 | H   | MET | 1622 | 82.885 | 87.118 | 100.993 | 0.00 | 0.00 |
| ATOM | 24324 | CA  | MET | 1622 | 81.566 | 87.455 | 99.412  | 0.00 | 0.00 |
| ATOM | 24325 | HA  | MET | 1622 | 81.123 | 88.439 | 99.260  | 0.00 | 0.00 |
| ATOM | 24326 | CB  | MET | 1622 | 82.654 | 87.230 | 98.274  | 0.00 | 0.00 |
| ATOM | 24327 | HB2 | MET | 1622 | 83.245 | 86.391 | 98.643  | 0.00 | 0.00 |
| ATOM | 24328 | HB3 | MET | 1622 | 82.186 | 86.981 | 97.322  | 0.00 | 0.00 |
| ATOM | 24329 | CG  | MET | 1622 | 83.652 | 88.365 | 98.063  | 0.00 | 0.00 |

|      |       |      |     |      |        |        |         |      |      |
|------|-------|------|-----|------|--------|--------|---------|------|------|
| ATOM | 24330 | HG2  | MET | 1622 | 83.185 | 88.909 | 97.242  | 0.00 | 0.00 |
| ATOM | 24331 | HG3  | MET | 1622 | 83.834 | 89.106 | 98.841  | 0.00 | 0.00 |
| ATOM | 24332 | SD   | MET | 1622 | 85.265 | 87.838 | 97.436  | 0.00 | 0.00 |
| ATOM | 24333 | CE   | MET | 1622 | 84.878 | 87.494 | 95.656  | 0.00 | 0.00 |
| ATOM | 24334 | HE1  | MET | 1622 | 85.790 | 87.242 | 95.115  | 0.00 | 0.00 |
| ATOM | 24335 | HE2  | MET | 1622 | 84.296 | 86.574 | 95.725  | 0.00 | 0.00 |
| ATOM | 24336 | HE3  | MET | 1622 | 84.340 | 88.308 | 95.171  | 0.00 | 0.00 |
| ATOM | 24337 | C    | MET | 1622 | 80.446 | 86.447 | 99.237  | 0.00 | 0.00 |
| ATOM | 24338 | O    | MET | 1622 | 79.793 | 86.502 | 98.180  | 0.00 | 0.00 |
| ATOM | 24339 | N    | ILE | 1623 | 80.191 | 85.560 | 100.240 | 0.00 | 0.00 |
| ATOM | 24340 | H    | ILE | 1623 | 80.897 | 85.482 | 100.959 | 0.00 | 0.00 |
| ATOM | 24341 | CA   | ILE | 1623 | 79.303 | 84.405 | 100.075 | 0.00 | 0.00 |
| ATOM | 24342 | HA   | ILE | 1623 | 78.718 | 84.514 | 99.162  | 0.00 | 0.00 |
| ATOM | 24343 | CB   | ILE | 1623 | 80.203 | 83.183 | 99.921  | 0.00 | 0.00 |
| ATOM | 24344 | HB   | ILE | 1623 | 80.810 | 83.184 | 100.826 | 0.00 | 0.00 |
| ATOM | 24345 | CG2  | ILE | 1623 | 79.335 | 81.949 | 99.836  | 0.00 | 0.00 |
| ATOM | 24346 | 1HG2 | ILE | 1623 | 78.399 | 82.167 | 100.350 | 0.00 | 0.00 |
| ATOM | 24347 | 2HG2 | ILE | 1623 | 79.131 | 81.795 | 98.777  | 0.00 | 0.00 |
| ATOM | 24348 | 3HG2 | ILE | 1623 | 79.807 | 81.024 | 100.166 | 0.00 | 0.00 |
| ATOM | 24349 | CG1  | ILE | 1623 | 81.038 | 83.243 | 98.669  | 0.00 | 0.00 |
| ATOM | 24350 | 2HG1 | ILE | 1623 | 80.371 | 83.461 | 97.835  | 0.00 | 0.00 |
| ATOM | 24351 | 3HG1 | ILE | 1623 | 81.713 | 84.098 | 98.723  | 0.00 | 0.00 |
| ATOM | 24352 | CD1  | ILE | 1623 | 81.903 | 82.085 | 98.266  | 0.00 | 0.00 |
| ATOM | 24353 | 1HD1 | ILE | 1623 | 81.256 | 81.224 | 98.099  | 0.00 | 0.00 |
| ATOM | 24354 | 2HD1 | ILE | 1623 | 82.521 | 82.263 | 97.386  | 0.00 | 0.00 |
| ATOM | 24355 | 3HD1 | ILE | 1623 | 82.493 | 81.749 | 99.119  | 0.00 | 0.00 |

|      |       |     |     |      |        |        |         |      |      |
|------|-------|-----|-----|------|--------|--------|---------|------|------|
| ATOM | 24356 | C   | ILE | 1623 | 78.388 | 84.511 | 101.339 | 0.00 | 0.00 |
| ATOM | 24357 | O   | ILE | 1623 | 78.670 | 83.920 | 102.371 | 0.00 | 0.00 |
| ATOM | 24358 | N   | PRO | 1624 | 77.228 | 85.174 | 101.235 | 0.00 | 0.00 |
| ATOM | 24359 | CD  | PRO | 1624 | 76.743 | 86.054 | 100.245 | 0.00 | 0.00 |
| ATOM | 24360 | HD2 | PRO | 1624 | 77.559 | 86.354 | 99.588  | 0.00 | 0.00 |
| ATOM | 24361 | HD3 | PRO | 1624 | 75.888 | 85.536 | 99.810  | 0.00 | 0.00 |
| ATOM | 24362 | CG  | PRO | 1624 | 76.196 | 87.242 | 101.043 | 0.00 | 0.00 |
| ATOM | 24363 | HG2 | PRO | 1624 | 77.057 | 87.861 | 101.298 | 0.00 | 0.00 |
| ATOM | 24364 | HG3 | PRO | 1624 | 75.472 | 87.789 | 100.439 | 0.00 | 0.00 |
| ATOM | 24365 | CB  | PRO | 1624 | 75.588 | 86.593 | 102.311 | 0.00 | 0.00 |
| ATOM | 24366 | HB2 | PRO | 1624 | 75.760 | 87.259 | 103.157 | 0.00 | 0.00 |
| ATOM | 24367 | HB3 | PRO | 1624 | 74.556 | 86.387 | 102.026 | 0.00 | 0.00 |
| ATOM | 24368 | CA  | PRO | 1624 | 76.358 | 85.324 | 102.442 | 0.00 | 0.00 |
| ATOM | 24369 | HA  | PRO | 1624 | 76.957 | 85.477 | 103.339 | 0.00 | 0.00 |
| ATOM | 24370 | C   | PRO | 1624 | 75.420 | 84.035 | 102.690 | 0.00 | 0.00 |
| ATOM | 24371 | O   | PRO | 1624 | 74.933 | 83.816 | 103.770 | 0.00 | 0.00 |
| ATOM | 24372 | N   | ASP | 1625 | 75.117 | 83.324 | 101.613 | 0.00 | 0.00 |
| ATOM | 24373 | H   | ASP | 1625 | 75.559 | 83.632 | 100.758 | 0.00 | 0.00 |
| ATOM | 24374 | CA  | ASP | 1625 | 74.490 | 81.967 | 101.599 | 0.00 | 0.00 |
| ATOM | 24375 | HA  | ASP | 1625 | 74.729 | 81.357 | 102.470 | 0.00 | 0.00 |
| ATOM | 24376 | CB  | ASP | 1625 | 72.964 | 82.185 | 101.582 | 0.00 | 0.00 |
| ATOM | 24377 | HB2 | ASP | 1625 | 72.453 | 81.249 | 101.808 | 0.00 | 0.00 |
| ATOM | 24378 | HB3 | ASP | 1625 | 72.674 | 82.825 | 102.415 | 0.00 | 0.00 |
| ATOM | 24379 | CG  | ASP | 1625 | 72.608 | 82.946 | 100.226 | 0.00 | 0.00 |
| ATOM | 24380 | OD1 | ASP | 1625 | 72.251 | 82.153 | 99.311  | 0.00 | 0.00 |
| ATOM | 24381 | OD2 | ASP | 1625 | 72.855 | 84.148 | 99.945  | 0.00 | 0.00 |

|      |       |      |     |      |        |        |         |      |      |
|------|-------|------|-----|------|--------|--------|---------|------|------|
| ATOM | 24382 | C    | ASP | 1625 | 74.933 | 81.246 | 100.365 | 0.00 | 0.00 |
| ATOM | 24383 | O    | ASP | 1625 | 75.692 | 81.755 | 99.474  | 0.00 | 0.00 |
| ATOM | 24384 | N    | ILE | 1626 | 74.437 | 80.014 | 100.317 | 0.00 | 0.00 |
| ATOM | 24385 | H    | ILE | 1626 | 73.950 | 79.707 | 101.147 | 0.00 | 0.00 |
| ATOM | 24386 | CA   | ILE | 1626 | 74.130 | 79.118 | 99.210  | 0.00 | 0.00 |
| ATOM | 24387 | HA   | ILE | 1626 | 74.123 | 79.715 | 98.298  | 0.00 | 0.00 |
| ATOM | 24388 | CB   | ILE | 1626 | 75.237 | 77.947 | 99.194  | 0.00 | 0.00 |
| ATOM | 24389 | HB   | ILE | 1626 | 75.218 | 77.457 | 100.167 | 0.00 | 0.00 |
| ATOM | 24390 | CG2  | ILE | 1626 | 75.001 | 76.890 | 98.146  | 0.00 | 0.00 |
| ATOM | 24391 | 1HG2 | ILE | 1626 | 75.819 | 76.184 | 98.288  | 0.00 | 0.00 |
| ATOM | 24392 | 2HG2 | ILE | 1626 | 74.020 | 76.436 | 98.284  | 0.00 | 0.00 |
| ATOM | 24393 | 3HG2 | ILE | 1626 | 75.032 | 77.255 | 97.119  | 0.00 | 0.00 |
| ATOM | 24394 | CG1  | ILE | 1626 | 76.661 | 78.511 | 99.030  | 0.00 | 0.00 |
| ATOM | 24395 | 2HG1 | ILE | 1626 | 76.855 | 78.828 | 98.005  | 0.00 | 0.00 |
| ATOM | 24396 | 3HG1 | ILE | 1626 | 76.815 | 79.377 | 99.673  | 0.00 | 0.00 |
| ATOM | 24397 | CD1  | ILE | 1626 | 77.716 | 77.444 | 99.462  | 0.00 | 0.00 |
| ATOM | 24398 | 1HD1 | ILE | 1626 | 78.718 | 77.859 | 99.568  | 0.00 | 0.00 |
| ATOM | 24399 | 2HD1 | ILE | 1626 | 77.521 | 77.057 | 100.462 | 0.00 | 0.00 |
| ATOM | 24400 | 3HD1 | ILE | 1626 | 77.739 | 76.576 | 98.802  | 0.00 | 0.00 |
| ATOM | 24401 | C    | ILE | 1626 | 72.746 | 78.535 | 99.337  | 0.00 | 0.00 |
| ATOM | 24402 | O    | ILE | 1626 | 72.356 | 78.206 | 100.420 | 0.00 | 0.00 |
| ATOM | 24403 | N    | GLN | 1627 | 72.031 | 78.335 | 98.194  | 0.00 | 0.00 |
| ATOM | 24404 | H    | GLN | 1627 | 72.396 | 78.612 | 97.295  | 0.00 | 0.00 |
| ATOM | 24405 | CA   | GLN | 1627 | 70.973 | 77.397 | 98.125  | 0.00 | 0.00 |
| ATOM | 24406 | HA   | GLN | 1627 | 70.698 | 77.152 | 99.151  | 0.00 | 0.00 |
| ATOM | 24407 | CB   | GLN | 1627 | 69.743 | 78.101 | 97.510  | 0.00 | 0.00 |

|      |       |      |     |      |        |        |        |      |      |
|------|-------|------|-----|------|--------|--------|--------|------|------|
| ATOM | 24408 | HB2  | GLN | 1627 | 70.059 | 78.759 | 96.701 | 0.00 | 0.00 |
| ATOM | 24409 | HB3  | GLN | 1627 | 69.084 | 77.324 | 97.122 | 0.00 | 0.00 |
| ATOM | 24410 | CG   | GLN | 1627 | 68.979 | 78.802 | 98.636 | 0.00 | 0.00 |
| ATOM | 24411 | HG2  | GLN | 1627 | 68.627 | 77.972 | 99.249 | 0.00 | 0.00 |
| ATOM | 24412 | HG3  | GLN | 1627 | 69.634 | 79.463 | 99.203 | 0.00 | 0.00 |
| ATOM | 24413 | CD   | GLN | 1627 | 67.783 | 79.557 | 97.960 | 0.00 | 0.00 |
| ATOM | 24414 | OE1  | GLN | 1627 | 67.867 | 80.265 | 96.998 | 0.00 | 0.00 |
| ATOM | 24415 | NE2  | GLN | 1627 | 66.636 | 79.508 | 98.549 | 0.00 | 0.00 |
| ATOM | 24416 | 1HE2 | GLN | 1627 | 65.902 | 79.982 | 98.043 | 0.00 | 0.00 |
| ATOM | 24417 | 2HE2 | GLN | 1627 | 66.411 | 79.170 | 99.474 | 0.00 | 0.00 |
| ATOM | 24418 | C    | GLN | 1627 | 71.366 | 76.168 | 97.273 | 0.00 | 0.00 |
| ATOM | 24419 | O    | GLN | 1627 | 71.985 | 76.308 | 96.202 | 0.00 | 0.00 |
| ATOM | 24420 | N    | VAL | 1628 | 70.912 | 74.976 | 97.620 | 0.00 | 0.00 |
| ATOM | 24421 | H    | VAL | 1628 | 70.210 | 74.927 | 98.345 | 0.00 | 0.00 |
| ATOM | 24422 | CA   | VAL | 1628 | 71.046 | 73.746 | 96.805 | 0.00 | 0.00 |
| ATOM | 24423 | HA   | VAL | 1628 | 71.415 | 74.023 | 95.817 | 0.00 | 0.00 |
| ATOM | 24424 | CB   | VAL | 1628 | 72.091 | 72.765 | 97.356 | 0.00 | 0.00 |
| ATOM | 24425 | HB   | VAL | 1628 | 71.673 | 71.977 | 97.983 | 0.00 | 0.00 |
| ATOM | 24426 | CG1  | VAL | 1628 | 72.524 | 71.777 | 96.203 | 0.00 | 0.00 |
| ATOM | 24427 | 1HG1 | VAL | 1628 | 73.406 | 71.201 | 96.481 | 0.00 | 0.00 |
| ATOM | 24428 | 2HG1 | VAL | 1628 | 71.706 | 71.141 | 95.863 | 0.00 | 0.00 |
| ATOM | 24429 | 3HG1 | VAL | 1628 | 72.890 | 72.339 | 95.343 | 0.00 | 0.00 |
| ATOM | 24430 | CG2  | VAL | 1628 | 73.230 | 73.552 | 98.038 | 0.00 | 0.00 |
| ATOM | 24431 | 1HG2 | VAL | 1628 | 73.961 | 72.764 | 98.218 | 0.00 | 0.00 |
| ATOM | 24432 | 2HG2 | VAL | 1628 | 73.487 | 74.407 | 97.413 | 0.00 | 0.00 |
| ATOM | 24433 | 3HG2 | VAL | 1628 | 72.876 | 73.887 | 99.013 | 0.00 | 0.00 |

|            |     |     |      |        |        |        |      |      |
|------------|-----|-----|------|--------|--------|--------|------|------|
| ATOM 24434 | C   | VAL | 1628 | 69.743 | 73.030 | 96.794 | 0.00 | 0.00 |
| ATOM 24435 | O   | VAL | 1628 | 69.187 | 72.911 | 97.848 | 0.00 | 0.00 |
| ATOM 24436 | N   | GLU | 1629 | 69.364 | 72.412 | 95.679 | 0.00 | 0.00 |
| ATOM 24437 | H   | GLU | 1629 | 69.837 | 72.548 | 94.797 | 0.00 | 0.00 |
| ATOM 24438 | CA  | GLU | 1629 | 68.426 | 71.321 | 95.772 | 0.00 | 0.00 |
| ATOM 24439 | HA  | GLU | 1629 | 67.984 | 71.291 | 96.767 | 0.00 | 0.00 |
| ATOM 24440 | CB  | GLU | 1629 | 67.254 | 71.468 | 94.802 | 0.00 | 0.00 |
| ATOM 24441 | HB2 | GLU | 1629 | 67.565 | 71.716 | 93.787 | 0.00 | 0.00 |
| ATOM 24442 | HB3 | GLU | 1629 | 66.875 | 70.469 | 94.588 | 0.00 | 0.00 |
| ATOM 24443 | CG  | GLU | 1629 | 65.950 | 72.332 | 95.220 | 0.00 | 0.00 |
| ATOM 24444 | HG2 | GLU | 1629 | 66.189 | 73.395 | 95.207 | 0.00 | 0.00 |
| ATOM 24445 | HG3 | GLU | 1629 | 65.791 | 72.207 | 96.291 | 0.00 | 0.00 |
| ATOM 24446 | CD  | GLU | 1629 | 64.607 | 72.010 | 94.499 | 0.00 | 0.00 |
| ATOM 24447 | OE1 | GLU | 1629 | 63.779 | 72.892 | 94.494 | 0.00 | 0.00 |
| ATOM 24448 | OE2 | GLU | 1629 | 64.265 | 70.847 | 94.138 | 0.00 | 0.00 |
| ATOM 24449 | C   | GLU | 1629 | 69.170 | 70.041 | 95.539 | 0.00 | 0.00 |
| ATOM 24450 | O   | GLU | 1629 | 69.769 | 69.919 | 94.525 | 0.00 | 0.00 |
| ATOM 24451 | N   | ALA | 1630 | 68.845 | 68.941 | 96.266 | 0.00 | 0.00 |
| ATOM 24452 | H   | ALA | 1630 | 68.257 | 69.055 | 97.080 | 0.00 | 0.00 |
| ATOM 24453 | CA  | ALA | 1630 | 69.213 | 67.612 | 95.994 | 0.00 | 0.00 |
| ATOM 24454 | HA  | ALA | 1630 | 69.663 | 67.510 | 95.007 | 0.00 | 0.00 |
| ATOM 24455 | CB  | ALA | 1630 | 70.411 | 67.405 | 96.958 | 0.00 | 0.00 |
| ATOM 24456 | HB1 | ALA | 1630 | 70.260 | 67.735 | 97.986 | 0.00 | 0.00 |
| ATOM 24457 | HB2 | ALA | 1630 | 70.636 | 66.345 | 96.836 | 0.00 | 0.00 |
| ATOM 24458 | HB3 | ALA | 1630 | 71.313 | 67.909 | 96.613 | 0.00 | 0.00 |
| ATOM 24459 | C   | ALA | 1630 | 68.183 | 66.524 | 96.398 | 0.00 | 0.00 |



|      |       |      |     |      |        |        |         |      |      |
|------|-------|------|-----|------|--------|--------|---------|------|------|
| ATOM | 24460 | O    | ALA | 1630 | 67.206 | 66.790 | 97.115  | 0.00 | 0.00 |
| ATOM | 24461 | N    | THR | 1631 | 68.300 | 65.270 | 95.925  | 0.00 | 0.00 |
| ATOM | 24462 | H    | THR | 1631 | 69.081 | 65.148 | 95.295  | 0.00 | 0.00 |
| ATOM | 24463 | CA   | THR | 1631 | 67.323 | 64.165 | 96.138  | 0.00 | 0.00 |
| ATOM | 24464 | HA   | THR | 1631 | 66.343 | 64.633 | 96.040  | 0.00 | 0.00 |
| ATOM | 24465 | CB   | THR | 1631 | 67.353 | 63.046 | 95.046  | 0.00 | 0.00 |
| ATOM | 24466 | HB   | THR | 1631 | 68.300 | 62.546 | 94.839  | 0.00 | 0.00 |
| ATOM | 24467 | CG2  | THR | 1631 | 66.103 | 62.117 | 95.087  | 0.00 | 0.00 |
| ATOM | 24468 | 1HG2 | THR | 1631 | 66.068 | 61.770 | 96.120  | 0.00 | 0.00 |
| ATOM | 24469 | 2HG2 | THR | 1631 | 65.147 | 62.607 | 94.901  | 0.00 | 0.00 |
| ATOM | 24470 | 3HG2 | THR | 1631 | 66.081 | 61.363 | 94.301  | 0.00 | 0.00 |
| ATOM | 24471 | OG1  | THR | 1631 | 67.082 | 63.799 | 93.847  | 0.00 | 0.00 |
| ATOM | 24472 | HG1  | THR | 1631 | 67.890 | 64.211 | 93.533  | 0.00 | 0.00 |
| ATOM | 24473 | C    | THR | 1631 | 67.589 | 63.569 | 97.529  | 0.00 | 0.00 |
| ATOM | 24474 | O    | THR | 1631 | 68.372 | 62.647 | 97.701  | 0.00 | 0.00 |
| ATOM | 24475 | N    | PHE | 1632 | 66.953 | 64.120 | 98.591  | 0.00 | 0.00 |
| ATOM | 24476 | H    | PHE | 1632 | 66.217 | 64.766 | 98.346  | 0.00 | 0.00 |
| ATOM | 24477 | CA   | PHE | 1632 | 66.668 | 63.519 | 99.864  | 0.00 | 0.00 |
| ATOM | 24478 | HA   | PHE | 1632 | 67.599 | 63.141 | 100.287 | 0.00 | 0.00 |
| ATOM | 24479 | CB   | PHE | 1632 | 65.972 | 64.622 | 100.776 | 0.00 | 0.00 |
| ATOM | 24480 | HB2  | PHE | 1632 | 65.194 | 65.128 | 100.205 | 0.00 | 0.00 |
| ATOM | 24481 | HB3  | PHE | 1632 | 65.470 | 64.260 | 101.673 | 0.00 | 0.00 |
| ATOM | 24482 | CG   | PHE | 1632 | 66.861 | 65.785 | 101.195 | 0.00 | 0.00 |
| ATOM | 24483 | CD1  | PHE | 1632 | 67.500 | 65.855 | 102.424 | 0.00 | 0.00 |
| ATOM | 24484 | HD1  | PHE | 1632 | 67.388 | 65.072 | 103.159 | 0.00 | 0.00 |
| ATOM | 24485 | CE1  | PHE | 1632 | 68.501 | 66.815 | 102.742 | 0.00 | 0.00 |

|      |       |     |     |      |        |        |         |      |      |
|------|-------|-----|-----|------|--------|--------|---------|------|------|
| ATOM | 24486 | HE1 | PHE | 1632 | 69.208 | 66.699 | 103.550 | 0.00 | 0.00 |
| ATOM | 24487 | CZ  | PHE | 1632 | 68.726 | 67.840 | 101.806 | 0.00 | 0.00 |
| ATOM | 24488 | HZ  | PHE | 1632 | 69.526 | 68.561 | 101.886 | 0.00 | 0.00 |
| ATOM | 24489 | CE2 | PHE | 1632 | 68.016 | 67.818 | 100.600 | 0.00 | 0.00 |
| ATOM | 24490 | HE2 | PHE | 1632 | 68.205 | 68.527 | 99.808  | 0.00 | 0.00 |
| ATOM | 24491 | CD2 | PHE | 1632 | 67.181 | 66.818 | 100.329 | 0.00 | 0.00 |
| ATOM | 24492 | HD2 | PHE | 1632 | 66.673 | 66.942 | 99.384  | 0.00 | 0.00 |
| ATOM | 24493 | C   | PHE | 1632 | 65.794 | 62.265 | 99.769  | 0.00 | 0.00 |
| ATOM | 24494 | O   | PHE | 1632 | 65.093 | 62.144 | 98.762  | 0.00 | 0.00 |
| ATOM | 24495 | N   | PRO | 1633 | 65.735 | 61.386 | 100.805 | 0.00 | 0.00 |
| ATOM | 24496 | CD  | PRO | 1633 | 66.641 | 61.399 | 101.941 | 0.00 | 0.00 |
| ATOM | 24497 | HD2 | PRO | 1633 | 66.476 | 62.206 | 102.655 | 0.00 | 0.00 |
| ATOM | 24498 | HD3 | PRO | 1633 | 67.680 | 61.318 | 101.622 | 0.00 | 0.00 |
| ATOM | 24499 | CG  | PRO | 1633 | 66.235 | 60.087 | 102.662 | 0.00 | 0.00 |
| ATOM | 24500 | HG2 | PRO | 1633 | 67.063 | 59.454 | 102.342 | 0.00 | 0.00 |
| ATOM | 24501 | HG3 | PRO | 1633 | 66.166 | 60.093 | 103.750 | 0.00 | 0.00 |
| ATOM | 24502 | CB  | PRO | 1633 | 64.876 | 59.660 | 102.011 | 0.00 | 0.00 |
| ATOM | 24503 | HB2 | PRO | 1633 | 64.716 | 58.587 | 102.113 | 0.00 | 0.00 |
| ATOM | 24504 | HB3 | PRO | 1633 | 64.102 | 60.169 | 102.585 | 0.00 | 0.00 |
| ATOM | 24505 | CA  | PRO | 1633 | 64.866 | 60.202 | 100.635 | 0.00 | 0.00 |
| ATOM | 24506 | HA  | PRO | 1633 | 65.261 | 59.452 | 99.951  | 0.00 | 0.00 |
| ATOM | 24507 | C   | PRO | 1633 | 63.314 | 60.409 | 100.249 | 0.00 | 0.00 |
| ATOM | 24508 | O   | PRO | 1633 | 62.714 | 59.369 | 99.972  | 0.00 | 0.00 |
| ATOM | 24509 | N   | ASP | 1634 | 62.778 | 61.618 | 100.314 | 0.00 | 0.00 |
| ATOM | 24510 | H   | ASP | 1634 | 63.220 | 62.426 | 100.727 | 0.00 | 0.00 |
| ATOM | 24511 | CA  | ASP | 1634 | 61.386 | 61.915 | 99.705  | 0.00 | 0.00 |

|      |       |     |     |      |        |        |         |      |      |
|------|-------|-----|-----|------|--------|--------|---------|------|------|
| ATOM | 24512 | HA  | ASP | 1634 | 60.880 | 60.949 | 99.689  | 0.00 | 0.00 |
| ATOM | 24513 | CB  | ASP | 1634 | 60.486 | 62.725 | 100.679 | 0.00 | 0.00 |
| ATOM | 24514 | HB2 | ASP | 1634 | 59.422 | 62.488 | 100.669 | 0.00 | 0.00 |
| ATOM | 24515 | HB3 | ASP | 1634 | 60.808 | 62.425 | 101.676 | 0.00 | 0.00 |
| ATOM | 24516 | CG  | ASP | 1634 | 60.748 | 64.249 | 100.577 | 0.00 | 0.00 |
| ATOM | 24517 | OD1 | ASP | 1634 | 60.909 | 64.878 | 101.662 | 0.00 | 0.00 |
| ATOM | 24518 | OD2 | ASP | 1634 | 60.892 | 64.728 | 99.467  | 0.00 | 0.00 |
| ATOM | 24519 | C   | ASP | 1634 | 61.369 | 62.308 | 98.175  | 0.00 | 0.00 |
| ATOM | 24520 | O   | ASP | 1634 | 60.321 | 62.157 | 97.516  | 0.00 | 0.00 |
| ATOM | 24521 | N   | GLY | 1635 | 62.539 | 62.751 | 97.633  | 0.00 | 0.00 |
| ATOM | 24522 | H   | GLY | 1635 | 63.382 | 62.730 | 98.189  | 0.00 | 0.00 |
| ATOM | 24523 | CA  | GLY | 1635 | 62.629 | 63.355 | 96.302  | 0.00 | 0.00 |
| ATOM | 24524 | HA2 | GLY | 1635 | 63.059 | 62.660 | 95.581  | 0.00 | 0.00 |
| ATOM | 24525 | HA3 | GLY | 1635 | 61.655 | 63.707 | 95.963  | 0.00 | 0.00 |
| ATOM | 24526 | C   | GLY | 1635 | 63.518 | 64.567 | 96.381  | 0.00 | 0.00 |
| ATOM | 24527 | O   | GLY | 1635 | 64.208 | 64.837 | 97.356  | 0.00 | 0.00 |
| ATOM | 24528 | N   | SER | 1636 | 63.524 | 65.391 | 95.327  | 0.00 | 0.00 |
| ATOM | 24529 | H   | SER | 1636 | 62.942 | 65.291 | 94.508  | 0.00 | 0.00 |
| ATOM | 24530 | CA  | SER | 1636 | 64.353 | 66.655 | 95.422  | 0.00 | 0.00 |
| ATOM | 24531 | HA  | SER | 1636 | 65.322 | 66.429 | 95.866  | 0.00 | 0.00 |
| ATOM | 24532 | CB  | SER | 1636 | 64.452 | 67.322 | 94.056  | 0.00 | 0.00 |
| ATOM | 24533 | HB2 | SER | 1636 | 64.980 | 66.619 | 93.412  | 0.00 | 0.00 |
| ATOM | 24534 | HB3 | SER | 1636 | 63.486 | 67.538 | 93.601  | 0.00 | 0.00 |
| ATOM | 24535 | OG  | SER | 1636 | 65.349 | 68.396 | 94.110  | 0.00 | 0.00 |
| ATOM | 24536 | HG  | SER | 1636 | 64.937 | 69.236 | 94.326  | 0.00 | 0.00 |
| ATOM | 24537 | C   | SER | 1636 | 63.754 | 67.729 | 96.321  | 0.00 | 0.00 |

|      |       |     |     |      |        |        |         |      |      |
|------|-------|-----|-----|------|--------|--------|---------|------|------|
| ATOM | 24538 | O   | SER | 1636 | 62.562 | 67.998 | 96.316  | 0.00 | 0.00 |
| ATOM | 24539 | N   | LYS | 1637 | 64.570 | 68.167 | 97.290  | 0.00 | 0.00 |
| ATOM | 24540 | H   | LYS | 1637 | 65.539 | 67.883 | 97.285  | 0.00 | 0.00 |
| ATOM | 24541 | CA  | LYS | 1637 | 64.220 | 69.178 | 98.253  | 0.00 | 0.00 |
| ATOM | 24542 | HA  | LYS | 1637 | 63.289 | 69.639 | 97.923  | 0.00 | 0.00 |
| ATOM | 24543 | CB  | LYS | 1637 | 63.774 | 68.518 | 99.614  | 0.00 | 0.00 |
| ATOM | 24544 | HB2 | LYS | 1637 | 64.600 | 67.994 | 100.096 | 0.00 | 0.00 |
| ATOM | 24545 | HB3 | LYS | 1637 | 63.537 | 69.356 | 100.270 | 0.00 | 0.00 |
| ATOM | 24546 | CG  | LYS | 1637 | 62.513 | 67.634 | 99.553  | 0.00 | 0.00 |
| ATOM | 24547 | HG2 | LYS | 1637 | 62.674 | 66.871 | 98.792  | 0.00 | 0.00 |
| ATOM | 24548 | HG3 | LYS | 1637 | 62.461 | 67.092 | 100.498 | 0.00 | 0.00 |
| ATOM | 24549 | CD  | LYS | 1637 | 61.283 | 68.548 | 99.396  | 0.00 | 0.00 |
| ATOM | 24550 | HD2 | LYS | 1637 | 61.212 | 69.342 | 100.140 | 0.00 | 0.00 |
| ATOM | 24551 | HD3 | LYS | 1637 | 61.206 | 69.014 | 98.414  | 0.00 | 0.00 |
| ATOM | 24552 | CE  | LYS | 1637 | 59.928 | 67.806 | 99.504  | 0.00 | 0.00 |
| ATOM | 24553 | HE2 | LYS | 1637 | 59.859 | 66.977 | 98.800  | 0.00 | 0.00 |
| ATOM | 24554 | HE3 | LYS | 1637 | 59.834 | 67.396 | 100.510 | 0.00 | 0.00 |
| ATOM | 24555 | NZ  | LYS | 1637 | 58.786 | 68.805 | 99.322  | 0.00 | 0.00 |
| ATOM | 24556 | HZ1 | LYS | 1637 | 59.070 | 69.771 | 99.406  | 0.00 | 0.00 |
| ATOM | 24557 | HZ2 | LYS | 1637 | 58.443 | 68.793 | 98.373  | 0.00 | 0.00 |
| ATOM | 24558 | HZ3 | LYS | 1637 | 58.000 | 68.512 | 99.885  | 0.00 | 0.00 |
| ATOM | 24559 | C   | LYS | 1637 | 65.390 | 70.236 | 98.418  | 0.00 | 0.00 |
| ATOM | 24560 | O   | LYS | 1637 | 66.601 | 70.014 | 98.235  | 0.00 | 0.00 |
| ATOM | 24561 | N   | LEU | 1638 | 64.931 | 71.368 | 98.879  | 0.00 | 0.00 |
| ATOM | 24562 | H   | LEU | 1638 | 63.944 | 71.427 | 99.087  | 0.00 | 0.00 |
| ATOM | 24563 | CA  | LEU | 1638 | 65.641 | 72.678 | 99.062  | 0.00 | 0.00 |

|            |      |     |      |        |        |         |      |      |
|------------|------|-----|------|--------|--------|---------|------|------|
| ATOM 24564 | HA   | LEU | 1638 | 66.451 | 72.787 | 98.342  | 0.00 | 0.00 |
| ATOM 24565 | CB   | LEU | 1638 | 64.716 | 73.809 | 98.723  | 0.00 | 0.00 |
| ATOM 24566 | HB2  | LEU | 1638 | 64.502 | 73.666 | 97.664  | 0.00 | 0.00 |
| ATOM 24567 | HB3  | LEU | 1638 | 63.720 | 73.647 | 99.135  | 0.00 | 0.00 |
| ATOM 24568 | CG   | LEU | 1638 | 65.003 | 75.290 | 98.944  | 0.00 | 0.00 |
| ATOM 24569 | HG   | LEU | 1638 | 65.296 | 75.477 | 99.977  | 0.00 | 0.00 |
| ATOM 24570 | CD1  | LEU | 1638 | 66.256 | 75.540 | 98.165  | 0.00 | 0.00 |
| ATOM 24571 | 1HD1 | LEU | 1638 | 66.149 | 75.127 | 97.162  | 0.00 | 0.00 |
| ATOM 24572 | 2HD1 | LEU | 1638 | 66.487 | 76.600 | 98.061  | 0.00 | 0.00 |
| ATOM 24573 | 3HD1 | LEU | 1638 | 67.088 | 75.021 | 98.640  | 0.00 | 0.00 |
| ATOM 24574 | CD2  | LEU | 1638 | 63.809 | 76.199 | 98.548  | 0.00 | 0.00 |
| ATOM 24575 | 1HD2 | LEU | 1638 | 63.064 | 76.083 | 99.335  | 0.00 | 0.00 |
| ATOM 24576 | 2HD2 | LEU | 1638 | 64.179 | 77.210 | 98.382  | 0.00 | 0.00 |
| ATOM 24577 | 3HD2 | LEU | 1638 | 63.446 | 75.756 | 97.620  | 0.00 | 0.00 |
| ATOM 24578 | C    | LEU | 1638 | 66.182 | 72.902 | 100.484 | 0.00 | 0.00 |
| ATOM 24579 | O    | LEU | 1638 | 65.458 | 72.883 | 101.451 | 0.00 | 0.00 |
| ATOM 24580 | N    | VAL | 1639 | 67.479 | 73.209 | 100.559 | 0.00 | 0.00 |
| ATOM 24581 | H    | VAL | 1639 | 67.973 | 73.133 | 99.681  | 0.00 | 0.00 |
| ATOM 24582 | CA   | VAL | 1639 | 68.216 | 73.787 | 101.667 | 0.00 | 0.00 |
| ATOM 24583 | HA   | VAL | 1639 | 67.535 | 73.837 | 102.517 | 0.00 | 0.00 |
| ATOM 24584 | CB   | VAL | 1639 | 69.367 | 72.883 | 102.125 | 0.00 | 0.00 |
| ATOM 24585 | HB   | VAL | 1639 | 70.117 | 72.807 | 101.337 | 0.00 | 0.00 |
| ATOM 24586 | CG1  | VAL | 1639 | 70.068 | 73.455 | 103.339 | 0.00 | 0.00 |
| ATOM 24587 | 1HG1 | VAL | 1639 | 70.869 | 72.788 | 103.657 | 0.00 | 0.00 |
| ATOM 24588 | 2HG1 | VAL | 1639 | 70.506 | 74.421 | 103.091 | 0.00 | 0.00 |
| ATOM 24589 | 3HG1 | VAL | 1639 | 69.386 | 73.473 | 104.189 | 0.00 | 0.00 |

|      |       |          |      |        |        |         |      |      |
|------|-------|----------|------|--------|--------|---------|------|------|
| ATOM | 24590 | CG2 VAL  | 1639 | 68.974 | 71.466 | 102.389 | 0.00 | 0.00 |
| ATOM | 24591 | 1HG2 VAL | 1639 | 69.639 | 71.089 | 103.167 | 0.00 | 0.00 |
| ATOM | 24592 | 2HG2 VAL | 1639 | 67.914 | 71.351 | 102.613 | 0.00 | 0.00 |
| ATOM | 24593 | 3HG2 VAL | 1639 | 69.064 | 70.895 | 101.465 | 0.00 | 0.00 |
| ATOM | 24594 | C VAL    | 1639 | 68.701 | 75.188 | 101.296 | 0.00 | 0.00 |
| ATOM | 24595 | O VAL    | 1639 | 69.168 | 75.412 | 100.153 | 0.00 | 0.00 |
| ATOM | 24596 | N THR    | 1640 | 68.578 | 76.097 | 102.182 | 0.00 | 0.00 |
| ATOM | 24597 | H THR    | 1640 | 67.886 | 75.969 | 102.907 | 0.00 | 0.00 |
| ATOM | 24598 | CA THR   | 1640 | 69.409 | 77.298 | 102.273 | 0.00 | 0.00 |
| ATOM | 24599 | HA THR   | 1640 | 69.935 | 77.320 | 101.319 | 0.00 | 0.00 |
| ATOM | 24600 | CB THR   | 1640 | 68.721 | 78.727 | 102.327 | 0.00 | 0.00 |
| ATOM | 24601 | HB THR   | 1640 | 68.395 | 78.826 | 103.362 | 0.00 | 0.00 |
| ATOM | 24602 | CG2 THR  | 1640 | 69.712 | 79.876 | 102.110 | 0.00 | 0.00 |
| ATOM | 24603 | 1HG2 THR | 1640 | 70.540 | 79.570 | 101.469 | 0.00 | 0.00 |
| ATOM | 24604 | 2HG2 THR | 1640 | 69.256 | 80.756 | 101.656 | 0.00 | 0.00 |
| ATOM | 24605 | 3HG2 THR | 1640 | 70.081 | 80.303 | 103.042 | 0.00 | 0.00 |
| ATOM | 24606 | OG1 THR  | 1640 | 67.708 | 78.920 | 101.431 | 0.00 | 0.00 |
| ATOM | 24607 | HG1 THR  | 1640 | 66.921 | 79.083 | 101.956 | 0.00 | 0.00 |
| ATOM | 24608 | C THR    | 1640 | 70.413 | 77.214 | 103.420 | 0.00 | 0.00 |
| ATOM | 24609 | O THR    | 1640 | 70.072 | 77.209 | 104.628 | 0.00 | 0.00 |
| ATOM | 24610 | N VAL    | 1641 | 71.714 | 77.314 | 103.049 | 0.00 | 0.00 |
| ATOM | 24611 | H VAL    | 1641 | 71.922 | 77.542 | 102.088 | 0.00 | 0.00 |
| ATOM | 24612 | CA VAL   | 1641 | 72.853 | 77.318 | 103.915 | 0.00 | 0.00 |
| ATOM | 24613 | HA VAL   | 1641 | 72.511 | 76.807 | 104.815 | 0.00 | 0.00 |
| ATOM | 24614 | CB VAL   | 1641 | 73.965 | 76.442 | 103.418 | 0.00 | 0.00 |
| ATOM | 24615 | HB VAL   | 1641 | 74.474 | 77.007 | 102.637 | 0.00 | 0.00 |

|      |       |      |     |      |        |        |         |      |      |
|------|-------|------|-----|------|--------|--------|---------|------|------|
| ATOM | 24616 | CG1  | VAL | 1641 | 75.104 | 76.085 | 104.493 | 0.00 | 0.00 |
| ATOM | 24617 | 1HG1 | VAL | 1641 | 74.659 | 75.422 | 105.235 | 0.00 | 0.00 |
| ATOM | 24618 | 2HG1 | VAL | 1641 | 75.961 | 75.673 | 103.961 | 0.00 | 0.00 |
| ATOM | 24619 | 3HG1 | VAL | 1641 | 75.424 | 77.067 | 104.843 | 0.00 | 0.00 |
| ATOM | 24620 | CG2  | VAL | 1641 | 73.465 | 75.122 | 102.825 | 0.00 | 0.00 |
| ATOM | 24621 | 1HG2 | VAL | 1641 | 72.887 | 74.615 | 103.597 | 0.00 | 0.00 |
| ATOM | 24622 | 2HG2 | VAL | 1641 | 73.018 | 75.310 | 101.849 | 0.00 | 0.00 |
| ATOM | 24623 | 3HG2 | VAL | 1641 | 74.349 | 74.505 | 102.660 | 0.00 | 0.00 |
| ATOM | 24624 | C    | VAL | 1641 | 73.243 | 78.796 | 104.136 | 0.00 | 0.00 |
| ATOM | 24625 | O    | VAL | 1641 | 74.153 | 79.259 | 103.480 | 0.00 | 0.00 |
| ATOM | 24626 | N    | HIE | 1642 | 72.702 | 79.407 | 105.225 | 0.00 | 0.00 |
| ATOM | 24627 | H    | HIE | 1642 | 71.916 | 78.890 | 105.591 | 0.00 | 0.00 |
| ATOM | 24628 | CA   | HIE | 1642 | 73.106 | 80.661 | 105.875 | 0.00 | 0.00 |
| ATOM | 24629 | HA   | HIE | 1642 | 73.098 | 81.499 | 105.179 | 0.00 | 0.00 |
| ATOM | 24630 | CB   | HIE | 1642 | 72.056 | 81.066 | 106.893 | 0.00 | 0.00 |
| ATOM | 24631 | HB2  | HIE | 1642 | 71.896 | 80.183 | 107.512 | 0.00 | 0.00 |
| ATOM | 24632 | HB3  | HIE | 1642 | 72.396 | 81.885 | 107.526 | 0.00 | 0.00 |
| ATOM | 24633 | CG   | HIE | 1642 | 70.710 | 81.407 | 106.371 | 0.00 | 0.00 |
| ATOM | 24634 | ND1  | HIE | 1642 | 70.259 | 82.722 | 106.206 | 0.00 | 0.00 |
| ATOM | 24635 | CE1  | HIE | 1642 | 69.042 | 82.605 | 105.737 | 0.00 | 0.00 |
| ATOM | 24636 | HE1  | HIE | 1642 | 68.398 | 83.439 | 105.500 | 0.00 | 0.00 |
| ATOM | 24637 | NE2  | HIE | 1642 | 68.709 | 81.320 | 105.478 | 0.00 | 0.00 |
| ATOM | 24638 | HE2  | HIE | 1642 | 67.820 | 80.954 | 105.169 | 0.00 | 0.00 |
| ATOM | 24639 | CD2  | HIE | 1642 | 69.820 | 80.581 | 105.812 | 0.00 | 0.00 |
| ATOM | 24640 | HD2  | HIE | 1642 | 69.941 | 79.508 | 105.805 | 0.00 | 0.00 |
| ATOM | 24641 | C    | HIE | 1642 | 74.453 | 80.678 | 106.527 | 0.00 | 0.00 |

|      |       |      |     |      |        |        |         |      |      |
|------|-------|------|-----|------|--------|--------|---------|------|------|
| ATOM | 24642 | O    | HIE | 1642 | 74.810 | 79.789 | 107.296 | 0.00 | 0.00 |
| ATOM | 24643 | N    | ASN | 1643 | 75.265 | 81.687 | 106.177 | 0.00 | 0.00 |
| ATOM | 24644 | H    | ASN | 1643 | 74.884 | 82.442 | 105.625 | 0.00 | 0.00 |
| ATOM | 24645 | CA   | ASN | 1643 | 76.702 | 81.889 | 106.395 | 0.00 | 0.00 |
| ATOM | 24646 | HA   | ASN | 1643 | 77.017 | 82.512 | 105.558 | 0.00 | 0.00 |
| ATOM | 24647 | CB   | ASN | 1643 | 76.978 | 82.711 | 107.682 | 0.00 | 0.00 |
| ATOM | 24648 | HB2  | ASN | 1643 | 76.790 | 82.080 | 108.550 | 0.00 | 0.00 |
| ATOM | 24649 | HB3  | ASN | 1643 | 78.024 | 83.014 | 107.644 | 0.00 | 0.00 |
| ATOM | 24650 | CG   | ASN | 1643 | 76.093 | 83.926 | 107.787 | 0.00 | 0.00 |
| ATOM | 24651 | OD1  | ASN | 1643 | 75.237 | 84.058 | 108.635 | 0.00 | 0.00 |
| ATOM | 24652 | ND2  | ASN | 1643 | 76.300 | 84.881 | 106.864 | 0.00 | 0.00 |
| ATOM | 24653 | 1HD2 | ASN | 1643 | 75.753 | 85.726 | 106.955 | 0.00 | 0.00 |
| ATOM | 24654 | 2HD2 | ASN | 1643 | 77.173 | 84.775 | 106.368 | 0.00 | 0.00 |
| ATOM | 24655 | C    | ASN | 1643 | 77.421 | 80.569 | 106.417 | 0.00 | 0.00 |
| ATOM | 24656 | O    | ASN | 1643 | 77.738 | 80.041 | 107.541 | 0.00 | 0.00 |
| ATOM | 24657 | N    | PRO | 1644 | 77.810 | 80.053 | 105.231 | 0.00 | 0.00 |
| ATOM | 24658 | CD   | PRO | 1644 | 77.373 | 80.463 | 103.872 | 0.00 | 0.00 |
| ATOM | 24659 | HD2  | PRO | 1644 | 76.380 | 80.906 | 103.806 | 0.00 | 0.00 |
| ATOM | 24660 | HD3  | PRO | 1644 | 78.072 | 81.176 | 103.435 | 0.00 | 0.00 |
| ATOM | 24661 | CG   | PRO | 1644 | 77.410 | 79.125 | 103.038 | 0.00 | 0.00 |
| ATOM | 24662 | HG2  | PRO | 1644 | 76.553 | 78.480 | 103.233 | 0.00 | 0.00 |
| ATOM | 24663 | HG3  | PRO | 1644 | 77.495 | 79.388 | 101.984 | 0.00 | 0.00 |
| ATOM | 24664 | CB   | PRO | 1644 | 78.611 | 78.508 | 103.642 | 0.00 | 0.00 |
| ATOM | 24665 | HB2  | PRO | 1644 | 78.680 | 77.465 | 103.333 | 0.00 | 0.00 |
| ATOM | 24666 | HB3  | PRO | 1644 | 79.486 | 79.018 | 103.239 | 0.00 | 0.00 |
| ATOM | 24667 | CA   | PRO | 1644 | 78.603 | 78.818 | 105.138 | 0.00 | 0.00 |



|      |       |      |     |      |        |        |         |      |      |
|------|-------|------|-----|------|--------|--------|---------|------|------|
| ATOM | 24668 | HA   | PRO | 1644 | 78.113 | 78.027 | 105.705 | 0.00 | 0.00 |
| ATOM | 24669 | C    | PRO | 1644 | 80.089 | 78.857 | 105.566 | 0.00 | 0.00 |
| ATOM | 24670 | O    | PRO | 1644 | 80.682 | 77.845 | 105.951 | 0.00 | 0.00 |
| ATOM | 24671 | N    | ILE | 1645 | 80.686 | 80.107 | 105.682 | 0.00 | 0.00 |
| ATOM | 24672 | H    | ILE | 1645 | 80.269 | 80.980 | 105.390 | 0.00 | 0.00 |
| ATOM | 24673 | CA   | ILE | 1645 | 82.068 | 80.194 | 106.147 | 0.00 | 0.00 |
| ATOM | 24674 | HA   | ILE | 1645 | 82.370 | 79.269 | 106.638 | 0.00 | 0.00 |
| ATOM | 24675 | CB   | ILE | 1645 | 83.039 | 80.624 | 104.993 | 0.00 | 0.00 |
| ATOM | 24676 | HB   | ILE | 1645 | 82.791 | 81.606 | 104.588 | 0.00 | 0.00 |
| ATOM | 24677 | CG2  | ILE | 1645 | 84.445 | 80.506 | 105.579 | 0.00 | 0.00 |
| ATOM | 24678 | 1HG2 | ILE | 1645 | 85.229 | 80.668 | 104.840 | 0.00 | 0.00 |
| ATOM | 24679 | 2HG2 | ILE | 1645 | 84.505 | 81.312 | 106.311 | 0.00 | 0.00 |
| ATOM | 24680 | 3HG2 | ILE | 1645 | 84.645 | 79.625 | 106.188 | 0.00 | 0.00 |
| ATOM | 24681 | CG1  | ILE | 1645 | 82.971 | 79.595 | 103.796 | 0.00 | 0.00 |
| ATOM | 24682 | 2HG1 | ILE | 1645 | 83.349 | 78.600 | 104.032 | 0.00 | 0.00 |
| ATOM | 24683 | 3HG1 | ILE | 1645 | 81.916 | 79.510 | 103.534 | 0.00 | 0.00 |
| ATOM | 24684 | CD1  | ILE | 1645 | 83.743 | 80.122 | 102.553 | 0.00 | 0.00 |
| ATOM | 24685 | 1HD1 | ILE | 1645 | 84.796 | 80.385 | 102.655 | 0.00 | 0.00 |
| ATOM | 24686 | 2HD1 | ILE | 1645 | 83.629 | 79.407 | 101.738 | 0.00 | 0.00 |
| ATOM | 24687 | 3HD1 | ILE | 1645 | 83.386 | 81.081 | 102.180 | 0.00 | 0.00 |
| ATOM | 24688 | C    | ILE | 1645 | 82.091 | 81.284 | 107.184 | 0.00 | 0.00 |
| ATOM | 24689 | O    | ILE | 1645 | 82.087 | 82.481 | 106.815 | 0.00 | 0.00 |
| ATOM | 24690 | N    | ILC | 1646 | 82.064 | 80.844 | 108.433 | 0.00 | 0.00 |
| ATOM | 24691 | H    | ILC | 1646 | 81.976 | 79.852 | 108.603 | 0.00 | 0.00 |
| ATOM | 24692 | CA   | ILC | 1646 | 81.907 | 81.672 | 109.600 | 0.00 | 0.00 |
| ATOM | 24693 | HA   | ILC | 1646 | 81.586 | 82.666 | 109.288 | 0.00 | 0.00 |

|            |      |     |      |        |        |         |      |      |
|------------|------|-----|------|--------|--------|---------|------|------|
| ATOM 24694 | CB   | ILC | 1646 | 80.868 | 80.971 | 110.585 | 0.00 | 0.00 |
| ATOM 24695 | HB   | ILC | 1646 | 81.320 | 81.022 | 111.575 | 0.00 | 0.00 |
| ATOM 24696 | CG2  | ILC | 1646 | 79.649 | 81.852 | 110.507 | 0.00 | 0.00 |
| ATOM 24697 | 1HG2 | ILC | 1646 | 79.804 | 82.880 | 110.836 | 0.00 | 0.00 |
| ATOM 24698 | 2HG2 | ILC | 1646 | 79.308 | 81.825 | 109.472 | 0.00 | 0.00 |
| ATOM 24699 | 3HG2 | ILC | 1646 | 78.880 | 81.442 | 111.161 | 0.00 | 0.00 |
| ATOM 24700 | CG1  | ILC | 1646 | 80.615 | 79.490 | 110.322 | 0.00 | 0.00 |
| ATOM 24701 | 2HG1 | ILC | 1646 | 80.004 | 79.379 | 109.427 | 0.00 | 0.00 |
| ATOM 24702 | 3HG1 | ILC | 1646 | 81.575 | 78.986 | 110.208 | 0.00 | 0.00 |
| ATOM 24703 | CD1  | ILC | 1646 | 79.802 | 78.947 | 111.500 | 0.00 | 0.00 |
| ATOM 24704 | 1HD1 | ILC | 1646 | 80.310 | 79.202 | 112.431 | 0.00 | 0.00 |
| ATOM 24705 | 2HD1 | ILC | 1646 | 78.820 | 79.408 | 111.602 | 0.00 | 0.00 |
| ATOM 24706 | 3HD1 | ILC | 1646 | 79.676 | 77.882 | 111.305 | 0.00 | 0.00 |
| ATOM 24707 | C    | ILC | 1646 | 83.246 | 81.807 | 110.255 | 0.00 | 0.00 |
| ATOM 24708 | O    | ILC | 1646 | 83.877 | 80.837 | 110.815 | 0.00 | 0.00 |
| ATOM 24709 | OXT  | ILC | 1646 | 83.724 | 82.990 | 110.072 | 0.00 | 0.00 |
| ATOM 24710 | N    | MEN | 1647 | 86.777 | 96.174 | 105.213 | 0.00 | 0.00 |
| ATOM 24711 | H1   | MEN | 1647 | 85.781 | 96.046 | 105.103 | 0.00 | 0.00 |
| ATOM 24712 | H2   | MEN | 1647 | 86.820 | 96.962 | 105.844 | 0.00 | 0.00 |
| ATOM 24713 | H3   | MEN | 1647 | 87.184 | 95.359 | 105.648 | 0.00 | 0.00 |
| ATOM 24714 | CA   | MEN | 1647 | 87.469 | 96.561 | 103.888 | 0.00 | 0.00 |
| ATOM 24715 | HA   | MEN | 1647 | 86.813 | 97.392 | 103.628 | 0.00 | 0.00 |
| ATOM 24716 | CB   | MEN | 1647 | 88.875 | 97.189 | 104.113 | 0.00 | 0.00 |
| ATOM 24717 | HB2  | MEN | 1647 | 88.728 | 98.082 | 104.720 | 0.00 | 0.00 |
| ATOM 24718 | HB3  | MEN | 1647 | 89.500 | 96.523 | 104.708 | 0.00 | 0.00 |
| ATOM 24719 | CG   | MEN | 1647 | 89.698 | 97.715 | 102.915 | 0.00 | 0.00 |

|            |               |        |        |         |      |      |
|------------|---------------|--------|--------|---------|------|------|
| ATOM 24720 | HG2 MEN 1647  | 90.477 | 98.368 | 103.310 | 0.00 | 0.00 |
| ATOM 24721 | HG3 MEN 1647  | 90.157 | 96.870 | 102.402 | 0.00 | 0.00 |
| ATOM 24722 | SD MEN 1647   | 88.752 | 98.637 | 101.756 | 0.00 | 0.00 |
| ATOM 24723 | CE MEN 1647   | 90.084 | 99.200 | 100.632 | 0.00 | 0.00 |
| ATOM 24724 | HE1 MEN 1647  | 90.551 | 98.307 | 100.217 | 0.00 | 0.00 |
| ATOM 24725 | HE2 MEN 1647  | 89.772 | 99.678 | 99.704  | 0.00 | 0.00 |
| ATOM 24726 | HE3 MEN 1647  | 90.775 | 99.766 | 101.258 | 0.00 | 0.00 |
| ATOM 24727 | C MEN 1647    | 87.282 | 95.500 | 102.774 | 0.00 | 0.00 |
| ATOM 24728 | O MEN 1647    | 88.241 | 95.151 | 102.209 | 0.00 | 0.00 |
| ATOM 24729 | N ILE 1648    | 86.051 | 95.224 | 102.484 | 0.00 | 0.00 |
| ATOM 24730 | H ILE 1648    | 85.296 | 95.688 | 102.969 | 0.00 | 0.00 |
| ATOM 24731 | CA ILE 1648   | 85.828 | 94.059 | 101.574 | 0.00 | 0.00 |
| ATOM 24732 | HA ILE 1648   | 86.614 | 93.306 | 101.641 | 0.00 | 0.00 |
| ATOM 24733 | CB ILE 1648   | 84.612 | 93.153 | 102.102 | 0.00 | 0.00 |
| ATOM 24734 | HB ILE 1648   | 84.495 | 92.360 | 101.363 | 0.00 | 0.00 |
| ATOM 24735 | CG2 ILE 1648  | 84.819 | 92.549 | 103.539 | 0.00 | 0.00 |
| ATOM 24736 | 1HG2 ILE 1648 | 84.840 | 93.308 | 104.321 | 0.00 | 0.00 |
| ATOM 24737 | 2HG2 ILE 1648 | 84.108 | 91.747 | 103.738 | 0.00 | 0.00 |
| ATOM 24738 | 3HG2 ILE 1648 | 85.847 | 92.197 | 103.457 | 0.00 | 0.00 |
| ATOM 24739 | CG1 ILE 1648  | 83.246 | 93.818 | 102.048 | 0.00 | 0.00 |
| ATOM 24740 | 2HG1 ILE 1648 | 83.191 | 94.651 | 102.749 | 0.00 | 0.00 |
| ATOM 24741 | 3HG1 ILE 1648 | 83.122 | 94.237 | 101.049 | 0.00 | 0.00 |
| ATOM 24742 | CD1 ILE 1648  | 82.078 | 92.880 | 102.360 | 0.00 | 0.00 |
| ATOM 24743 | 1HD1 ILE 1648 | 82.072 | 92.778 | 103.446 | 0.00 | 0.00 |
| ATOM 24744 | 2HD1 ILE 1648 | 81.148 | 93.373 | 102.079 | 0.00 | 0.00 |
| ATOM 24745 | 3HD1 ILE 1648 | 82.120 | 91.913 | 101.858 | 0.00 | 0.00 |

|      |       |     |     |      |        |        |         |      |      |
|------|-------|-----|-----|------|--------|--------|---------|------|------|
| ATOM | 24746 | C   | ILE | 1648 | 85.660 | 94.392 | 100.052 | 0.00 | 0.00 |
| ATOM | 24747 | O   | ILE | 1648 | 85.430 | 95.537 | 99.722  | 0.00 | 0.00 |
| ATOM | 24748 | N   | PRO | 1649 | 85.884 | 93.365 | 99.179  | 0.00 | 0.00 |
| ATOM | 24749 | CD  | PRO | 1649 | 86.478 | 92.012 | 99.388  | 0.00 | 0.00 |
| ATOM | 24750 | HD2 | PRO | 1649 | 87.372 | 92.099 | 100.005 | 0.00 | 0.00 |
| ATOM | 24751 | HD3 | PRO | 1649 | 85.801 | 91.309 | 99.874  | 0.00 | 0.00 |
| ATOM | 24752 | CG  | PRO | 1649 | 86.758 | 91.401 | 98.019  | 0.00 | 0.00 |
| ATOM | 24753 | HG2 | PRO | 1649 | 87.740 | 91.587 | 97.585  | 0.00 | 0.00 |
| ATOM | 24754 | HG3 | PRO | 1649 | 86.629 | 90.319 | 98.048  | 0.00 | 0.00 |
| ATOM | 24755 | CB  | PRO | 1649 | 85.739 | 92.124 | 97.106  | 0.00 | 0.00 |
| ATOM | 24756 | HB2 | PRO | 1649 | 86.118 | 92.208 | 96.087  | 0.00 | 0.00 |
| ATOM | 24757 | HB3 | PRO | 1649 | 84.776 | 91.617 | 97.035  | 0.00 | 0.00 |
| ATOM | 24758 | CA  | PRO | 1649 | 85.598 | 93.544 | 97.777  | 0.00 | 0.00 |
| ATOM | 24759 | HA  | PRO | 1649 | 86.359 | 94.185 | 97.332  | 0.00 | 0.00 |
| ATOM | 24760 | C   | PRO | 1649 | 84.168 | 94.134 | 97.556  | 0.00 | 0.00 |
| ATOM | 24761 | O   | PRO | 1649 | 83.195 | 93.621 | 98.010  | 0.00 | 0.00 |
| ATOM | 24762 | N   | GLY | 1650 | 84.042 | 95.313 | 96.900  | 0.00 | 0.00 |
| ATOM | 24763 | H   | GLY | 1650 | 84.899 | 95.647 | 96.481  | 0.00 | 0.00 |
| ATOM | 24764 | CA  | GLY | 1650 | 82.725 | 95.925 | 96.558  | 0.00 | 0.00 |
| ATOM | 24765 | HA2 | GLY | 1650 | 82.825 | 96.613 | 95.719  | 0.00 | 0.00 |
| ATOM | 24766 | HA3 | GLY | 1650 | 82.006 | 95.170 | 96.241  | 0.00 | 0.00 |
| ATOM | 24767 | C   | GLY | 1650 | 82.129 | 96.675 | 97.741  | 0.00 | 0.00 |
| ATOM | 24768 | O   | GLY | 1650 | 81.028 | 97.158 | 97.614  | 0.00 | 0.00 |
| ATOM | 24769 | N   | GLU | 1651 | 82.784 | 96.836 | 98.890  | 0.00 | 0.00 |
| ATOM | 24770 | H   | GLU | 1651 | 83.735 | 96.501 | 98.933  | 0.00 | 0.00 |
| ATOM | 24771 | CA  | GLU | 1651 | 82.339 | 97.452 | 100.168 | 0.00 | 0.00 |

|      |       |     |     |      |        |         |         |      |      |
|------|-------|-----|-----|------|--------|---------|---------|------|------|
| ATOM | 24772 | HA  | GLU | 1651 | 81.655 | 96.708  | 100.576 | 0.00 | 0.00 |
| ATOM | 24773 | CB  | GLU | 1651 | 83.518 | 97.524  | 101.180 | 0.00 | 0.00 |
| ATOM | 24774 | HB2 | GLU | 1651 | 83.633 | 96.529  | 101.612 | 0.00 | 0.00 |
| ATOM | 24775 | HB3 | GLU | 1651 | 84.481 | 97.817  | 100.761 | 0.00 | 0.00 |
| ATOM | 24776 | CG  | GLU | 1651 | 83.307 | 98.485  | 102.382 | 0.00 | 0.00 |
| ATOM | 24777 | HG2 | GLU | 1651 | 83.132 | 99.508  | 102.051 | 0.00 | 0.00 |
| ATOM | 24778 | HG3 | GLU | 1651 | 82.358 | 98.122  | 102.778 | 0.00 | 0.00 |
| ATOM | 24779 | CD  | GLU | 1651 | 84.353 | 98.311  | 103.458 | 0.00 | 0.00 |
| ATOM | 24780 | OE1 | GLU | 1651 | 84.547 | 97.223  | 103.848 | 0.00 | 0.00 |
| ATOM | 24781 | OE2 | GLU | 1651 | 84.773 | 99.352  | 104.030 | 0.00 | 0.00 |
| ATOM | 24782 | C   | GLU | 1651 | 81.682 | 98.910  | 99.931  | 0.00 | 0.00 |
| ATOM | 24783 | O   | GLU | 1651 | 82.133 | 99.749  | 99.176  | 0.00 | 0.00 |
| ATOM | 24784 | N   | TYR | 1652 | 80.625 | 99.155  | 100.696 | 0.00 | 0.00 |
| ATOM | 24785 | H   | TYR | 1652 | 80.142 | 98.472  | 101.263 | 0.00 | 0.00 |
| ATOM | 24786 | CA  | TYR | 1652 | 79.992 | 100.508 | 100.827 | 0.00 | 0.00 |
| ATOM | 24787 | HA  | TYR | 1652 | 79.935 | 100.916 | 99.818  | 0.00 | 0.00 |
| ATOM | 24788 | CB  | TYR | 1652 | 78.525 | 100.395 | 101.234 | 0.00 | 0.00 |
| ATOM | 24789 | HB2 | TYR | 1652 | 78.449 | 99.587  | 101.962 | 0.00 | 0.00 |
| ATOM | 24790 | HB3 | TYR | 1652 | 78.264 | 101.346 | 101.699 | 0.00 | 0.00 |
| ATOM | 24791 | CG  | TYR | 1652 | 77.631 | 100.139 | 100.036 | 0.00 | 0.00 |
| ATOM | 24792 | CD1 | TYR | 1652 | 77.504 | 101.046 | 99.040  | 0.00 | 0.00 |
| ATOM | 24793 | HD1 | TYR | 1652 | 78.118 | 101.925 | 99.172  | 0.00 | 0.00 |
| ATOM | 24794 | CE1 | TYR | 1652 | 76.664 | 100.843 | 97.969  | 0.00 | 0.00 |
| ATOM | 24795 | HE1 | TYR | 1652 | 76.509 | 101.558 | 97.175  | 0.00 | 0.00 |
| ATOM | 24796 | CZ  | TYR | 1652 | 75.925 | 99.678  | 97.901  | 0.00 | 0.00 |
| ATOM | 24797 | OH  | TYR | 1652 | 75.167 | 99.384  | 96.823  | 0.00 | 0.00 |

|      |       |     |     |      |        |         |         |      |      |
|------|-------|-----|-----|------|--------|---------|---------|------|------|
| ATOM | 24798 | HH  | TYR | 1652 | 74.756 | 98.519  | 96.886  | 0.00 | 0.00 |
| ATOM | 24799 | CE2 | TYR | 1652 | 75.936 | 98.756  | 98.925  | 0.00 | 0.00 |
| ATOM | 24800 | HE2 | TYR | 1652 | 75.471 | 97.781  | 98.898  | 0.00 | 0.00 |
| ATOM | 24801 | CD2 | TYR | 1652 | 76.771 | 98.980  | 99.999  | 0.00 | 0.00 |
| ATOM | 24802 | HD2 | TYR | 1652 | 76.780 | 98.305  | 100.842 | 0.00 | 0.00 |
| ATOM | 24803 | C   | TYR | 1652 | 80.751 | 101.521 | 101.654 | 0.00 | 0.00 |
| ATOM | 24804 | O   | TYR | 1652 | 81.058 | 101.243 | 102.767 | 0.00 | 0.00 |
| ATOM | 24805 | N   | HIE | 1653 | 80.952 | 102.803 | 101.174 | 0.00 | 0.00 |
| ATOM | 24806 | H   | HIE | 1653 | 80.563 | 103.086 | 100.286 | 0.00 | 0.00 |
| ATOM | 24807 | CA  | HIE | 1653 | 81.353 | 103.920 | 102.050 | 0.00 | 0.00 |
| ATOM | 24808 | HA  | HIE | 1653 | 81.305 | 103.477 | 103.045 | 0.00 | 0.00 |
| ATOM | 24809 | CB  | HIE | 1653 | 82.787 | 104.349 | 101.799 | 0.00 | 0.00 |
| ATOM | 24810 | HB2 | HIE | 1653 | 83.489 | 103.528 | 101.947 | 0.00 | 0.00 |
| ATOM | 24811 | HB3 | HIE | 1653 | 82.959 | 104.584 | 100.749 | 0.00 | 0.00 |
| ATOM | 24812 | CG  | HIE | 1653 | 83.362 | 105.424 | 102.677 | 0.00 | 0.00 |
| ATOM | 24813 | ND1 | HIE | 1653 | 83.459 | 105.256 | 104.049 | 0.00 | 0.00 |
| ATOM | 24814 | CE1 | HIE | 1653 | 84.045 | 106.341 | 104.520 | 0.00 | 0.00 |
| ATOM | 24815 | HE1 | HIE | 1653 | 84.393 | 106.348 | 105.542 | 0.00 | 0.00 |
| ATOM | 24816 | NE2 | HIE | 1653 | 84.383 | 107.206 | 103.503 | 0.00 | 0.00 |
| ATOM | 24817 | HE2 | HIE | 1653 | 85.045 | 107.968 | 103.527 | 0.00 | 0.00 |
| ATOM | 24818 | CD2 | HIE | 1653 | 83.896 | 106.647 | 102.351 | 0.00 | 0.00 |
| ATOM | 24819 | HD2 | HIE | 1653 | 84.017 | 107.125 | 101.390 | 0.00 | 0.00 |
| ATOM | 24820 | C   | HIE | 1653 | 80.340 | 105.093 | 102.163 | 0.00 | 0.00 |
| ATOM | 24821 | O   | HIE | 1653 | 80.217 | 105.913 | 101.256 | 0.00 | 0.00 |
| ATOM | 24822 | N   | VAL | 1654 | 79.541 | 105.127 | 103.230 | 0.00 | 0.00 |
| ATOM | 24823 | H   | VAL | 1654 | 79.812 | 104.488 | 103.963 | 0.00 | 0.00 |

|      |       |      |     |      |        |         |         |      |      |
|------|-------|------|-----|------|--------|---------|---------|------|------|
| ATOM | 24824 | CA   | VAL | 1654 | 78.425 | 106.040 | 103.492 | 0.00 | 0.00 |
| ATOM | 24825 | HA   | VAL | 1654 | 78.430 | 106.853 | 102.766 | 0.00 | 0.00 |
| ATOM | 24826 | CB   | VAL | 1654 | 77.047 | 105.250 | 103.246 | 0.00 | 0.00 |
| ATOM | 24827 | HB   | VAL | 1654 | 77.125 | 104.759 | 102.276 | 0.00 | 0.00 |
| ATOM | 24828 | CG1  | VAL | 1654 | 76.755 | 104.134 | 104.321 | 0.00 | 0.00 |
| ATOM | 24829 | 1HG1 | VAL | 1654 | 76.115 | 103.354 | 103.907 | 0.00 | 0.00 |
| ATOM | 24830 | 2HG1 | VAL | 1654 | 77.674 | 103.618 | 104.599 | 0.00 | 0.00 |
| ATOM | 24831 | 3HG1 | VAL | 1654 | 76.211 | 104.565 | 105.162 | 0.00 | 0.00 |
| ATOM | 24832 | CG2  | VAL | 1654 | 75.956 | 106.301 | 103.235 | 0.00 | 0.00 |
| ATOM | 24833 | 1HG2 | VAL | 1654 | 75.061 | 105.701 | 103.070 | 0.00 | 0.00 |
| ATOM | 24834 | 2HG2 | VAL | 1654 | 75.768 | 106.793 | 104.190 | 0.00 | 0.00 |
| ATOM | 24835 | 3HG2 | VAL | 1654 | 76.064 | 106.983 | 102.391 | 0.00 | 0.00 |
| ATOM | 24836 | C    | VAL | 1654 | 78.593 | 106.785 | 104.844 | 0.00 | 0.00 |
| ATOM | 24837 | O    | VAL | 1654 | 79.111 | 106.263 | 105.845 | 0.00 | 0.00 |
| ATOM | 24838 | N    | LYS | 1655 | 78.185 | 108.080 | 104.851 | 0.00 | 0.00 |
| ATOM | 24839 | H    | LYS | 1655 | 77.815 | 108.491 | 104.006 | 0.00 | 0.00 |
| ATOM | 24840 | CA   | LYS | 1655 | 78.122 | 108.952 | 106.041 | 0.00 | 0.00 |
| ATOM | 24841 | HA   | LYS | 1655 | 78.944 | 108.624 | 106.678 | 0.00 | 0.00 |
| ATOM | 24842 | CB   | LYS | 1655 | 78.412 | 110.402 | 105.676 | 0.00 | 0.00 |
| ATOM | 24843 | HB2  | LYS | 1655 | 77.537 | 110.723 | 105.110 | 0.00 | 0.00 |
| ATOM | 24844 | HB3  | LYS | 1655 | 78.475 | 110.930 | 106.628 | 0.00 | 0.00 |
| ATOM | 24845 | CG   | LYS | 1655 | 79.794 | 110.644 | 104.990 | 0.00 | 0.00 |
| ATOM | 24846 | HG2  | LYS | 1655 | 80.576 | 110.663 | 105.749 | 0.00 | 0.00 |
| ATOM | 24847 | HG3  | LYS | 1655 | 79.964 | 109.956 | 104.162 | 0.00 | 0.00 |
| ATOM | 24848 | CD   | LYS | 1655 | 80.072 | 112.008 | 104.438 | 0.00 | 0.00 |
| ATOM | 24849 | HD2  | LYS | 1655 | 80.378 | 112.685 | 105.235 | 0.00 | 0.00 |

|      |       |     |     |      |        |         |         |      |      |
|------|-------|-----|-----|------|--------|---------|---------|------|------|
| ATOM | 24850 | HD3 | LYS | 1655 | 80.888 | 111.802 | 103.745 | 0.00 | 0.00 |
| ATOM | 24851 | CE  | LYS | 1655 | 79.013 | 112.695 | 103.585 | 0.00 | 0.00 |
| ATOM | 24852 | HE2 | LYS | 1655 | 78.184 | 112.807 | 104.283 | 0.00 | 0.00 |
| ATOM | 24853 | HE3 | LYS | 1655 | 79.357 | 113.701 | 103.344 | 0.00 | 0.00 |
| ATOM | 24854 | NZ  | LYS | 1655 | 78.524 | 112.060 | 102.343 | 0.00 | 0.00 |
| ATOM | 24855 | HZ1 | LYS | 1655 | 77.773 | 112.548 | 101.876 | 0.00 | 0.00 |
| ATOM | 24856 | HZ2 | LYS | 1655 | 79.256 | 112.056 | 101.647 | 0.00 | 0.00 |
| ATOM | 24857 | HZ3 | LYS | 1655 | 78.222 | 111.109 | 102.501 | 0.00 | 0.00 |
| ATOM | 24858 | C   | LYS | 1655 | 76.878 | 108.670 | 106.832 | 0.00 | 0.00 |
| ATOM | 24859 | O   | LYS | 1655 | 75.791 | 108.505 | 106.204 | 0.00 | 0.00 |
| ATOM | 24860 | N   | PRO | 1656 | 76.874 | 108.735 | 108.186 | 0.00 | 0.00 |
| ATOM | 24861 | CD  | PRO | 1656 | 77.987 | 108.724 | 109.093 | 0.00 | 0.00 |
| ATOM | 24862 | HD2 | PRO | 1656 | 78.595 | 107.861 | 108.823 | 0.00 | 0.00 |
| ATOM | 24863 | HD3 | PRO | 1656 | 78.561 | 109.642 | 108.962 | 0.00 | 0.00 |
| ATOM | 24864 | CG  | PRO | 1656 | 77.540 | 108.511 | 110.461 | 0.00 | 0.00 |
| ATOM | 24865 | HG2 | PRO | 1656 | 78.345 | 108.102 | 111.071 | 0.00 | 0.00 |
| ATOM | 24866 | HG3 | PRO | 1656 | 77.282 | 109.508 | 110.818 | 0.00 | 0.00 |
| ATOM | 24867 | CB  | PRO | 1656 | 76.123 | 107.821 | 110.332 | 0.00 | 0.00 |
| ATOM | 24868 | HB2 | PRO | 1656 | 76.234 | 106.740 | 110.423 | 0.00 | 0.00 |
| ATOM | 24869 | HB3 | PRO | 1656 | 75.450 | 108.085 | 111.148 | 0.00 | 0.00 |
| ATOM | 24870 | CA  | PRO | 1656 | 75.653 | 108.409 | 109.034 | 0.00 | 0.00 |
| ATOM | 24871 | HA  | PRO | 1656 | 75.120 | 107.691 | 108.410 | 0.00 | 0.00 |
| ATOM | 24872 | C   | PRO | 1656 | 74.806 | 109.678 | 109.205 | 0.00 | 0.00 |
| ATOM | 24873 | O   | PRO | 1656 | 75.118 | 110.701 | 108.642 | 0.00 | 0.00 |
| ATOM | 24874 | N   | GLY | 1657 | 73.694 | 109.676 | 109.913 | 0.00 | 0.00 |
| ATOM | 24875 | H   | GLY | 1657 | 73.457 | 108.796 | 110.349 | 0.00 | 0.00 |



|      |       |      |     |      |        |         |         |      |      |
|------|-------|------|-----|------|--------|---------|---------|------|------|
| ATOM | 24876 | CA   | GLY | 1657 | 72.830 | 110.842 | 110.213 | 0.00 | 0.00 |
| ATOM | 24877 | HA2  | GLY | 1657 | 73.136 | 111.260 | 111.173 | 0.00 | 0.00 |
| ATOM | 24878 | HA3  | GLY | 1657 | 72.886 | 111.642 | 109.475 | 0.00 | 0.00 |
| ATOM | 24879 | C    | GLY | 1657 | 71.297 | 110.492 | 110.137 | 0.00 | 0.00 |
| ATOM | 24880 | O    | GLY | 1657 | 70.965 | 109.404 | 110.612 | 0.00 | 0.00 |
| ATOM | 24881 | N    | GLN | 1658 | 70.431 | 111.367 | 109.538 | 0.00 | 0.00 |
| ATOM | 24882 | H    | GLN | 1658 | 70.777 | 112.273 | 109.256 | 0.00 | 0.00 |
| ATOM | 24883 | CA   | GLN | 1658 | 68.941 | 111.099 | 109.395 | 0.00 | 0.00 |
| ATOM | 24884 | HA   | GLN | 1658 | 68.656 | 110.055 | 109.261 | 0.00 | 0.00 |
| ATOM | 24885 | CB   | GLN | 1658 | 68.290 | 111.520 | 110.728 | 0.00 | 0.00 |
| ATOM | 24886 | HB2  | GLN | 1658 | 67.207 | 111.487 | 110.613 | 0.00 | 0.00 |
| ATOM | 24887 | HB3  | GLN | 1658 | 68.482 | 110.713 | 111.436 | 0.00 | 0.00 |
| ATOM | 24888 | CG   | GLN | 1658 | 68.682 | 112.857 | 111.329 | 0.00 | 0.00 |
| ATOM | 24889 | HG2  | GLN | 1658 | 69.743 | 112.847 | 111.576 | 0.00 | 0.00 |
| ATOM | 24890 | HG3  | GLN | 1658 | 68.597 | 113.694 | 110.636 | 0.00 | 0.00 |
| ATOM | 24891 | CD   | GLN | 1658 | 67.981 | 113.318 | 112.611 | 0.00 | 0.00 |
| ATOM | 24892 | OE1  | GLN | 1658 | 67.250 | 112.550 | 113.253 | 0.00 | 0.00 |
| ATOM | 24893 | NE2  | GLN | 1658 | 68.122 | 114.506 | 113.099 | 0.00 | 0.00 |
| ATOM | 24894 | 1HE2 | GLN | 1658 | 67.864 | 114.640 | 114.067 | 0.00 | 0.00 |
| ATOM | 24895 | 2HE2 | GLN | 1658 | 68.604 | 115.265 | 112.640 | 0.00 | 0.00 |
| ATOM | 24896 | C    | GLN | 1658 | 68.288 | 111.925 | 108.287 | 0.00 | 0.00 |
| ATOM | 24897 | O    | GLN | 1658 | 68.801 | 113.023 | 108.027 | 0.00 | 0.00 |
| ATOM | 24898 | N    | ILE | 1659 | 67.149 | 111.500 | 107.725 | 0.00 | 0.00 |
| ATOM | 24899 | H    | ILE | 1659 | 66.710 | 110.681 | 108.121 | 0.00 | 0.00 |
| ATOM | 24900 | CA   | ILE | 1659 | 66.381 | 112.159 | 106.748 | 0.00 | 0.00 |
| ATOM | 24901 | HA   | ILE | 1659 | 66.698 | 113.201 | 106.796 | 0.00 | 0.00 |

|      |       |      |     |      |        |         |         |      |      |
|------|-------|------|-----|------|--------|---------|---------|------|------|
| ATOM | 24902 | CB   | ILE | 1659 | 66.645 | 111.547 | 105.319 | 0.00 | 0.00 |
| ATOM | 24903 | HB   | ILE | 1659 | 66.389 | 110.494 | 105.436 | 0.00 | 0.00 |
| ATOM | 24904 | CG2  | ILE | 1659 | 65.694 | 112.178 | 104.300 | 0.00 | 0.00 |
| ATOM | 24905 | 1HG2 | ILE | 1659 | 65.692 | 113.232 | 104.580 | 0.00 | 0.00 |
| ATOM | 24906 | 2HG2 | ILE | 1659 | 66.154 | 112.090 | 103.316 | 0.00 | 0.00 |
| ATOM | 24907 | 3HG2 | ILE | 1659 | 64.704 | 111.759 | 104.123 | 0.00 | 0.00 |
| ATOM | 24908 | CG1  | ILE | 1659 | 68.174 | 111.638 | 104.951 | 0.00 | 0.00 |
| ATOM | 24909 | 2HG1 | ILE | 1659 | 68.375 | 112.707 | 105.011 | 0.00 | 0.00 |
| ATOM | 24910 | 3HG1 | ILE | 1659 | 68.789 | 111.085 | 105.662 | 0.00 | 0.00 |
| ATOM | 24911 | CD1  | ILE | 1659 | 68.401 | 111.168 | 103.489 | 0.00 | 0.00 |
| ATOM | 24912 | 1HD1 | ILE | 1659 | 68.102 | 111.906 | 102.745 | 0.00 | 0.00 |
| ATOM | 24913 | 2HD1 | ILE | 1659 | 69.483 | 111.089 | 103.375 | 0.00 | 0.00 |
| ATOM | 24914 | 3HD1 | ILE | 1659 | 67.895 | 110.203 | 103.453 | 0.00 | 0.00 |
| ATOM | 24915 | C    | ILE | 1659 | 64.939 | 112.051 | 107.260 | 0.00 | 0.00 |
| ATOM | 24916 | O    | ILE | 1659 | 64.476 | 111.008 | 107.678 | 0.00 | 0.00 |
| ATOM | 24917 | N    | ALA | 1660 | 64.217 | 113.149 | 107.009 | 0.00 | 0.00 |
| ATOM | 24918 | H    | ALA | 1660 | 64.688 | 113.927 | 106.568 | 0.00 | 0.00 |
| ATOM | 24919 | CA   | ALA | 1660 | 62.727 | 113.136 | 107.007 | 0.00 | 0.00 |
| ATOM | 24920 | HA   | ALA | 1660 | 62.444 | 112.268 | 107.601 | 0.00 | 0.00 |
| ATOM | 24921 | CB   | ALA | 1660 | 62.226 | 114.424 | 107.624 | 0.00 | 0.00 |
| ATOM | 24922 | HB1  | ALA | 1660 | 61.145 | 114.409 | 107.483 | 0.00 | 0.00 |
| ATOM | 24923 | HB2  | ALA | 1660 | 62.507 | 114.550 | 108.669 | 0.00 | 0.00 |
| ATOM | 24924 | HB3  | ALA | 1660 | 62.615 | 115.301 | 107.106 | 0.00 | 0.00 |
| ATOM | 24925 | C    | ALA | 1660 | 62.229 | 112.971 | 105.601 | 0.00 | 0.00 |
| ATOM | 24926 | O    | ALA | 1660 | 62.876 | 113.418 | 104.634 | 0.00 | 0.00 |
| ATOM | 24927 | N    | LEU | 1661 | 61.078 | 112.321 | 105.478 | 0.00 | 0.00 |

|      |       |      |     |      |        |         |         |      |      |
|------|-------|------|-----|------|--------|---------|---------|------|------|
| ATOM | 24928 | H    | LEU | 1661 | 60.580 | 112.106 | 106.330 | 0.00 | 0.00 |
| ATOM | 24929 | CA   | LEU | 1661 | 60.434 | 112.006 | 104.247 | 0.00 | 0.00 |
| ATOM | 24930 | HA   | LEU | 1661 | 61.143 | 112.243 | 103.453 | 0.00 | 0.00 |
| ATOM | 24931 | CB   | LEU | 1661 | 60.080 | 110.538 | 104.259 | 0.00 | 0.00 |
| ATOM | 24932 | HB2  | LEU | 1661 | 59.305 | 110.448 | 105.019 | 0.00 | 0.00 |
| ATOM | 24933 | HB3  | LEU | 1661 | 59.633 | 110.191 | 103.327 | 0.00 | 0.00 |
| ATOM | 24934 | CG   | LEU | 1661 | 61.173 | 109.512 | 104.577 | 0.00 | 0.00 |
| ATOM | 24935 | HG   | LEU | 1661 | 61.669 | 109.666 | 105.535 | 0.00 | 0.00 |
| ATOM | 24936 | CD1  | LEU | 1661 | 60.426 | 108.141 | 104.613 | 0.00 | 0.00 |
| ATOM | 24937 | 1HD1 | LEU | 1661 | 59.928 | 107.979 | 103.657 | 0.00 | 0.00 |
| ATOM | 24938 | 2HD1 | LEU | 1661 | 61.178 | 107.409 | 104.907 | 0.00 | 0.00 |
| ATOM | 24939 | 3HD1 | LEU | 1661 | 59.582 | 108.153 | 105.302 | 0.00 | 0.00 |
| ATOM | 24940 | CD2  | LEU | 1661 | 62.223 | 109.438 | 103.451 | 0.00 | 0.00 |
| ATOM | 24941 | 1HD2 | LEU | 1661 | 62.950 | 110.247 | 103.532 | 0.00 | 0.00 |
| ATOM | 24942 | 2HD2 | LEU | 1661 | 62.752 | 108.493 | 103.565 | 0.00 | 0.00 |
| ATOM | 24943 | 3HD2 | LEU | 1661 | 61.753 | 109.429 | 102.467 | 0.00 | 0.00 |
| ATOM | 24944 | C    | LEU | 1661 | 59.120 | 112.784 | 103.886 | 0.00 | 0.00 |
| ATOM | 24945 | O    | LEU | 1661 | 58.357 | 113.087 | 104.771 | 0.00 | 0.00 |
| ATOM | 24946 | N    | ASN | 1662 | 58.896 | 113.141 | 102.611 | 0.00 | 0.00 |
| ATOM | 24947 | H    | ASN | 1662 | 59.575 | 112.835 | 101.929 | 0.00 | 0.00 |
| ATOM | 24948 | CA   | ASN | 1662 | 57.733 | 113.854 | 102.082 | 0.00 | 0.00 |
| ATOM | 24949 | HA   | ASN | 1662 | 58.105 | 114.429 | 101.234 | 0.00 | 0.00 |
| ATOM | 24950 | CB   | ASN | 1662 | 56.608 | 112.842 | 101.562 | 0.00 | 0.00 |
| ATOM | 24951 | HB2  | ASN | 1662 | 55.723 | 113.411 | 101.279 | 0.00 | 0.00 |
| ATOM | 24952 | HB3  | ASN | 1662 | 56.939 | 112.267 | 100.697 | 0.00 | 0.00 |
| ATOM | 24953 | CG   | ASN | 1662 | 56.266 | 111.827 | 102.645 | 0.00 | 0.00 |

|      |       |      |     |      |        |         |         |      |      |
|------|-------|------|-----|------|--------|---------|---------|------|------|
| ATOM | 24954 | OD1  | ASN | 1662 | 56.726 | 110.696 | 102.589 | 0.00 | 0.00 |
| ATOM | 24955 | ND2  | ASN | 1662 | 55.394 | 112.249 | 103.553 | 0.00 | 0.00 |
| ATOM | 24956 | 1HD2 | ASN | 1662 | 55.127 | 111.669 | 104.336 | 0.00 | 0.00 |
| ATOM | 24957 | 2HD2 | ASN | 1662 | 55.414 | 113.236 | 103.765 | 0.00 | 0.00 |
| ATOM | 24958 | C    | ASN | 1662 | 57.192 | 114.995 | 102.941 | 0.00 | 0.00 |
| ATOM | 24959 | O    | ASN | 1662 | 56.020 | 115.020 | 103.161 | 0.00 | 0.00 |
| ATOM | 24960 | N    | THR | 1663 | 57.947 | 115.944 | 103.477 | 0.00 | 0.00 |
| ATOM | 24961 | H    | THR | 1663 | 58.939 | 115.779 | 103.389 | 0.00 | 0.00 |
| ATOM | 24962 | CA   | THR | 1663 | 57.570 | 117.122 | 104.314 | 0.00 | 0.00 |
| ATOM | 24963 | HA   | THR | 1663 | 56.857 | 116.714 | 105.030 | 0.00 | 0.00 |
| ATOM | 24964 | CB   | THR | 1663 | 58.815 | 117.598 | 105.151 | 0.00 | 0.00 |
| ATOM | 24965 | HB   | THR | 1663 | 58.495 | 118.456 | 105.743 | 0.00 | 0.00 |
| ATOM | 24966 | CG2  | THR | 1663 | 59.267 | 116.541 | 106.186 | 0.00 | 0.00 |
| ATOM | 24967 | 1HG2 | THR | 1663 | 59.567 | 115.577 | 105.775 | 0.00 | 0.00 |
| ATOM | 24968 | 2HG2 | THR | 1663 | 60.004 | 117.073 | 106.787 | 0.00 | 0.00 |
| ATOM | 24969 | 3HG2 | THR | 1663 | 58.403 | 116.380 | 106.831 | 0.00 | 0.00 |
| ATOM | 24970 | OG1  | THR | 1663 | 59.842 | 118.050 | 104.342 | 0.00 | 0.00 |
| ATOM | 24971 | HG1  | THR | 1663 | 60.301 | 117.303 | 103.952 | 0.00 | 0.00 |
| ATOM | 24972 | C    | THR | 1663 | 56.899 | 118.258 | 103.541 | 0.00 | 0.00 |
| ATOM | 24973 | O    | THR | 1663 | 56.932 | 118.263 | 102.336 | 0.00 | 0.00 |
| ATOM | 24974 | N    | GLY | 1664 | 56.223 | 119.170 | 104.146 | 0.00 | 0.00 |
| ATOM | 24975 | H    | GLY | 1664 | 56.283 | 119.047 | 105.147 | 0.00 | 0.00 |
| ATOM | 24976 | CA   | GLY | 1664 | 55.511 | 120.396 | 103.548 | 0.00 | 0.00 |
| ATOM | 24977 | HA2  | GLY | 1664 | 55.222 | 121.052 | 104.369 | 0.00 | 0.00 |
| ATOM | 24978 | HA3  | GLY | 1664 | 56.280 | 120.856 | 102.927 | 0.00 | 0.00 |
| ATOM | 24979 | C    | GLY | 1664 | 54.274 | 119.977 | 102.767 | 0.00 | 0.00 |

|      |       |      |     |      |        |         |         |      |      |
|------|-------|------|-----|------|--------|---------|---------|------|------|
| ATOM | 24980 | O    | GLY | 1664 | 53.810 | 120.702 | 101.888 | 0.00 | 0.00 |
| ATOM | 24981 | N    | ARG | 1665 | 53.708 | 118.837 | 103.088 | 0.00 | 0.00 |
| ATOM | 24982 | H    | ARG | 1665 | 54.143 | 118.264 | 103.797 | 0.00 | 0.00 |
| ATOM | 24983 | CA   | ARG | 1665 | 52.548 | 118.149 | 102.410 | 0.00 | 0.00 |
| ATOM | 24984 | HA   | ARG | 1665 | 52.107 | 118.753 | 101.617 | 0.00 | 0.00 |
| ATOM | 24985 | CB   | ARG | 1665 | 53.051 | 116.825 | 101.842 | 0.00 | 0.00 |
| ATOM | 24986 | HB2  | ARG | 1665 | 53.563 | 116.258 | 102.619 | 0.00 | 0.00 |
| ATOM | 24987 | HB3  | ARG | 1665 | 52.301 | 116.087 | 101.558 | 0.00 | 0.00 |
| ATOM | 24988 | CG   | ARG | 1665 | 54.044 | 116.901 | 100.611 | 0.00 | 0.00 |
| ATOM | 24989 | HG2  | ARG | 1665 | 53.452 | 117.254 | 99.767  | 0.00 | 0.00 |
| ATOM | 24990 | HG3  | ARG | 1665 | 54.930 | 117.501 | 100.819 | 0.00 | 0.00 |
| ATOM | 24991 | CD   | ARG | 1665 | 54.581 | 115.531 | 100.169 | 0.00 | 0.00 |
| ATOM | 24992 | HD2  | ARG | 1665 | 55.345 | 115.858 | 99.465  | 0.00 | 0.00 |
| ATOM | 24993 | HD3  | ARG | 1665 | 54.989 | 115.151 | 101.106 | 0.00 | 0.00 |
| ATOM | 24994 | NE   | ARG | 1665 | 53.538 | 114.679 | 99.621  | 0.00 | 0.00 |
| ATOM | 24995 | HE   | ARG | 1665 | 52.621 | 115.101 | 99.661  | 0.00 | 0.00 |
| ATOM | 24996 | CZ   | ARG | 1665 | 53.661 | 113.643 | 98.835  | 0.00 | 0.00 |
| ATOM | 24997 | NH1  | ARG | 1665 | 54.792 | 113.293 | 98.377  | 0.00 | 0.00 |
| ATOM | 24998 | 1HH1 | ARG | 1665 | 54.895 | 112.403 | 97.913  | 0.00 | 0.00 |
| ATOM | 24999 | 2HH1 | ARG | 1665 | 55.534 | 113.973 | 98.455  | 0.00 | 0.00 |
| ATOM | 25000 | NH2  | ARG | 1665 | 52.695 | 112.921 | 98.427  | 0.00 | 0.00 |
| ATOM | 25001 | 1HH2 | ARG | 1665 | 52.953 | 112.147 | 97.832  | 0.00 | 0.00 |
| ATOM | 25002 | 2HH2 | ARG | 1665 | 51.728 | 113.056 | 98.685  | 0.00 | 0.00 |
| ATOM | 25003 | C    | ARG | 1665 | 51.422 | 117.945 | 103.420 | 0.00 | 0.00 |
| ATOM | 25004 | O    | ARG | 1665 | 51.713 | 117.557 | 104.534 | 0.00 | 0.00 |
| ATOM | 25005 | N    | ALA | 1666 | 50.221 | 118.091 | 102.885 | 0.00 | 0.00 |

|      |       |      |     |      |        |         |         |      |      |
|------|-------|------|-----|------|--------|---------|---------|------|------|
| ATOM | 25006 | H    | ALA | 1666 | 50.120 | 118.437 | 101.941 | 0.00 | 0.00 |
| ATOM | 25007 | CA   | ALA | 1666 | 48.981 | 117.910 | 103.626 | 0.00 | 0.00 |
| ATOM | 25008 | HA   | ALA | 1666 | 48.906 | 118.612 | 104.457 | 0.00 | 0.00 |
| ATOM | 25009 | CB   | ALA | 1666 | 47.653 | 118.267 | 102.739 | 0.00 | 0.00 |
| ATOM | 25010 | HB1  | ALA | 1666 | 47.638 | 117.616 | 101.864 | 0.00 | 0.00 |
| ATOM | 25011 | HB2  | ALA | 1666 | 46.795 | 117.849 | 103.266 | 0.00 | 0.00 |
| ATOM | 25012 | HB3  | ALA | 1666 | 47.600 | 119.316 | 102.448 | 0.00 | 0.00 |
| ATOM | 25013 | C    | ALA | 1666 | 49.024 | 116.484 | 104.304 | 0.00 | 0.00 |
| ATOM | 25014 | O    | ALA | 1666 | 49.085 | 115.434 | 103.634 | 0.00 | 0.00 |
| ATOM | 25015 | N    | THR | 1667 | 48.847 | 116.514 | 105.665 | 0.00 | 0.00 |
| ATOM | 25016 | H    | THR | 1667 | 48.750 | 117.442 | 106.053 | 0.00 | 0.00 |
| ATOM | 25017 | CA   | THR | 1667 | 48.968 | 115.362 | 106.573 | 0.00 | 0.00 |
| ATOM | 25018 | HA   | THR | 1667 | 48.870 | 114.488 | 105.930 | 0.00 | 0.00 |
| ATOM | 25019 | CB   | THR | 1667 | 50.437 | 115.381 | 107.196 | 0.00 | 0.00 |
| ATOM | 25020 | HB   | THR | 1667 | 50.463 | 116.248 | 107.856 | 0.00 | 0.00 |
| ATOM | 25021 | CG2  | THR | 1667 | 50.986 | 114.180 | 107.933 | 0.00 | 0.00 |
| ATOM | 25022 | 1HG2 | THR | 1667 | 51.225 | 113.413 | 107.196 | 0.00 | 0.00 |
| ATOM | 25023 | 2HG2 | THR | 1667 | 51.880 | 114.433 | 108.503 | 0.00 | 0.00 |
| ATOM | 25024 | 3HG2 | THR | 1667 | 50.172 | 113.802 | 108.552 | 0.00 | 0.00 |
| ATOM | 25025 | OG1  | THR | 1667 | 51.376 | 115.552 | 106.145 | 0.00 | 0.00 |
| ATOM | 25026 | HG1  | THR | 1667 | 51.442 | 116.504 | 106.039 | 0.00 | 0.00 |
| ATOM | 25027 | C    | THR | 1667 | 47.812 | 115.426 | 107.563 | 0.00 | 0.00 |
| ATOM | 25028 | O    | THR | 1667 | 47.358 | 116.518 | 107.978 | 0.00 | 0.00 |
| ATOM | 25029 | N    | CYS | 1668 | 47.359 | 114.215 | 107.908 | 0.00 | 0.00 |
| ATOM | 25030 | H    | CYS | 1668 | 47.693 | 113.343 | 107.522 | 0.00 | 0.00 |
| ATOM | 25031 | CA   | CYS | 1668 | 46.316 | 114.059 | 108.964 | 0.00 | 0.00 |

|      |       |      |     |      |        |         |         |      |      |
|------|-------|------|-----|------|--------|---------|---------|------|------|
| ATOM | 25032 | HA   | CYS | 1668 | 46.366 | 114.852 | 109.710 | 0.00 | 0.00 |
| ATOM | 25033 | CB   | CYS | 1668 | 44.941 | 114.067 | 108.323 | 0.00 | 0.00 |
| ATOM | 25034 | HB2  | CYS | 1668 | 44.142 | 114.065 | 109.064 | 0.00 | 0.00 |
| ATOM | 25035 | HB3  | CYS | 1668 | 44.798 | 114.935 | 107.680 | 0.00 | 0.00 |
| ATOM | 25036 | SG   | CYS | 1668 | 44.595 | 112.614 | 107.339 | 0.00 | 0.00 |
| ATOM | 25037 | HG   | CYS | 1668 | 45.684 | 112.635 | 106.565 | 0.00 | 0.00 |
| ATOM | 25038 | C    | CYS | 1668 | 46.544 | 112.833 | 109.871 | 0.00 | 0.00 |
| ATOM | 25039 | O    | CYS | 1668 | 47.412 | 111.984 | 109.546 | 0.00 | 0.00 |
| ATOM | 25040 | N    | ARG | 1669 | 45.789 | 112.731 | 110.975 | 0.00 | 0.00 |
| ATOM | 25041 | H    | ARG | 1669 | 45.098 | 113.440 | 111.171 | 0.00 | 0.00 |
| ATOM | 25042 | CA   | ARG | 1669 | 45.705 | 111.566 | 111.822 | 0.00 | 0.00 |
| ATOM | 25043 | HA   | ARG | 1669 | 46.222 | 110.767 | 111.291 | 0.00 | 0.00 |
| ATOM | 25044 | CB   | ARG | 1669 | 46.293 | 111.934 | 113.200 | 0.00 | 0.00 |
| ATOM | 25045 | HB2  | ARG | 1669 | 46.234 | 113.016 | 113.319 | 0.00 | 0.00 |
| ATOM | 25046 | HB3  | ARG | 1669 | 45.631 | 111.541 | 113.972 | 0.00 | 0.00 |
| ATOM | 25047 | CG   | ARG | 1669 | 47.782 | 111.433 | 113.322 | 0.00 | 0.00 |
| ATOM | 25048 | HG2  | ARG | 1669 | 48.327 | 111.882 | 112.491 | 0.00 | 0.00 |
| ATOM | 25049 | HG3  | ARG | 1669 | 47.919 | 110.352 | 113.298 | 0.00 | 0.00 |
| ATOM | 25050 | CD   | ARG | 1669 | 48.323 | 111.824 | 114.617 | 0.00 | 0.00 |
| ATOM | 25051 | HD2  | ARG | 1669 | 48.013 | 112.800 | 114.991 | 0.00 | 0.00 |
| ATOM | 25052 | HD3  | ARG | 1669 | 47.964 | 111.081 | 115.329 | 0.00 | 0.00 |
| ATOM | 25053 | NE   | ARG | 1669 | 49.767 | 111.626 | 114.514 | 0.00 | 0.00 |
| ATOM | 25054 | HE   | ARG | 1669 | 50.283 | 112.084 | 113.777 | 0.00 | 0.00 |
| ATOM | 25055 | CZ   | ARG | 1669 | 50.519 | 110.740 | 115.124 | 0.00 | 0.00 |
| ATOM | 25056 | NH1  | ARG | 1669 | 50.110 | 110.091 | 116.251 | 0.00 | 0.00 |
| ATOM | 25057 | 1HH1 | ARG | 1669 | 50.880 | 109.760 | 116.815 | 0.00 | 0.00 |

|      |       |      |     |      |        |         |         |      |      |
|------|-------|------|-----|------|--------|---------|---------|------|------|
| ATOM | 25058 | 2HH1 | ARG | 1669 | 49.218 | 110.305 | 116.673 | 0.00 | 0.00 |
| ATOM | 25059 | NH2  | ARG | 1669 | 51.802 | 110.617 | 114.690 | 0.00 | 0.00 |
| ATOM | 25060 | 1HH2 | ARG | 1669 | 52.236 | 109.741 | 114.943 | 0.00 | 0.00 |
| ATOM | 25061 | 2HH2 | ARG | 1669 | 52.028 | 110.848 | 113.733 | 0.00 | 0.00 |
| ATOM | 25062 | C    | ARG | 1669 | 44.247 | 111.012 | 111.971 | 0.00 | 0.00 |
| ATOM | 25063 | O    | ARG | 1669 | 43.341 | 111.812 | 111.820 | 0.00 | 0.00 |
| ATOM | 25064 | N    | VAL | 1670 | 44.180 | 109.670 | 112.226 | 0.00 | 0.00 |
| ATOM | 25065 | H    | VAL | 1670 | 45.104 | 109.264 | 112.243 | 0.00 | 0.00 |
| ATOM | 25066 | CA   | VAL | 1670 | 42.925 | 108.929 | 112.398 | 0.00 | 0.00 |
| ATOM | 25067 | HA   | VAL | 1670 | 42.149 | 109.623 | 112.722 | 0.00 | 0.00 |
| ATOM | 25068 | CB   | VAL | 1670 | 42.377 | 108.425 | 111.050 | 0.00 | 0.00 |
| ATOM | 25069 | HB   | VAL | 1670 | 43.046 | 107.742 | 110.527 | 0.00 | 0.00 |
| ATOM | 25070 | CG1  | VAL | 1670 | 41.223 | 107.496 | 111.315 | 0.00 | 0.00 |
| ATOM | 25071 | 1HG1 | VAL | 1670 | 41.586 | 106.570 | 111.761 | 0.00 | 0.00 |
| ATOM | 25072 | 2HG1 | VAL | 1670 | 40.490 | 107.978 | 111.962 | 0.00 | 0.00 |
| ATOM | 25073 | 3HG1 | VAL | 1670 | 40.714 | 107.319 | 110.367 | 0.00 | 0.00 |
| ATOM | 25074 | CG2  | VAL | 1670 | 42.086 | 109.459 | 109.956 | 0.00 | 0.00 |
| ATOM | 25075 | 1HG2 | VAL | 1670 | 41.292 | 110.152 | 110.233 | 0.00 | 0.00 |
| ATOM | 25076 | 2HG2 | VAL | 1670 | 42.984 | 109.989 | 109.640 | 0.00 | 0.00 |
| ATOM | 25077 | 3HG2 | VAL | 1670 | 41.775 | 108.904 | 109.070 | 0.00 | 0.00 |
| ATOM | 25078 | C    | VAL | 1670 | 43.104 | 107.783 | 113.449 | 0.00 | 0.00 |
| ATOM | 25079 | O    | VAL | 1670 | 44.147 | 107.121 | 113.385 | 0.00 | 0.00 |
| ATOM | 25080 | N    | VAL | 1671 | 42.181 | 107.550 | 114.452 | 0.00 | 0.00 |
| ATOM | 25081 | H    | VAL | 1671 | 41.465 | 108.250 | 114.583 | 0.00 | 0.00 |
| ATOM | 25082 | CA   | VAL | 1671 | 42.015 | 106.319 | 115.265 | 0.00 | 0.00 |
| ATOM | 25083 | HA   | VAL | 1671 | 42.988 | 105.828 | 115.275 | 0.00 | 0.00 |



|            |               |        |         |         |      |      |
|------------|---------------|--------|---------|---------|------|------|
| ATOM 25084 | CB VAL 1671   | 41.685 | 106.606 | 116.756 | 0.00 | 0.00 |
| ATOM 25085 | HB VAL 1671   | 41.431 | 105.651 | 117.216 | 0.00 | 0.00 |
| ATOM 25086 | CG1 VAL 1671  | 42.930 | 107.118 | 117.572 | 0.00 | 0.00 |
| ATOM 25087 | 1HG1 VAL 1671 | 42.759 | 107.107 | 118.649 | 0.00 | 0.00 |
| ATOM 25088 | 2HG1 VAL 1671 | 43.715 | 106.389 | 117.369 | 0.00 | 0.00 |
| ATOM 25089 | 3HG1 VAL 1671 | 43.354 | 108.055 | 117.213 | 0.00 | 0.00 |
| ATOM 25090 | CG2 VAL 1671  | 40.421 | 107.370 | 116.982 | 0.00 | 0.00 |
| ATOM 25091 | 1HG2 VAL 1671 | 40.313 | 107.498 | 118.059 | 0.00 | 0.00 |
| ATOM 25092 | 2HG2 VAL 1671 | 40.489 | 108.355 | 116.520 | 0.00 | 0.00 |
| ATOM 25093 | 3HG2 VAL 1671 | 39.589 | 106.837 | 116.522 | 0.00 | 0.00 |
| ATOM 25094 | C VAL 1671    | 41.072 | 105.272 | 114.714 | 0.00 | 0.00 |
| ATOM 25095 | O VAL 1671    | 40.101 | 105.559 | 114.057 | 0.00 | 0.00 |
| ATOM 25096 | N VAL 1672    | 41.488 | 103.985 | 114.812 | 0.00 | 0.00 |
| ATOM 25097 | H VAL 1672    | 42.304 | 103.776 | 115.369 | 0.00 | 0.00 |
| ATOM 25098 | CA VAL 1672   | 40.833 | 102.814 | 114.181 | 0.00 | 0.00 |
| ATOM 25099 | HA VAL 1672   | 39.750 | 102.931 | 114.128 | 0.00 | 0.00 |
| ATOM 25100 | CB VAL 1672   | 41.399 | 102.759 | 112.745 | 0.00 | 0.00 |
| ATOM 25101 | HB VAL 1672   | 40.759 | 103.518 | 112.295 | 0.00 | 0.00 |
| ATOM 25102 | CG1 VAL 1672  | 42.869 | 103.128 | 112.577 | 0.00 | 0.00 |
| ATOM 25103 | 1HG1 VAL 1672 | 43.526 | 102.542 | 113.221 | 0.00 | 0.00 |
| ATOM 25104 | 2HG1 VAL 1672 | 43.197 | 103.059 | 111.540 | 0.00 | 0.00 |
| ATOM 25105 | 3HG1 VAL 1672 | 42.895 | 104.157 | 112.937 | 0.00 | 0.00 |
| ATOM 25106 | CG2 VAL 1672  | 41.142 | 101.456 | 112.085 | 0.00 | 0.00 |
| ATOM 25107 | 1HG2 VAL 1672 | 40.122 | 101.112 | 112.258 | 0.00 | 0.00 |
| ATOM 25108 | 2HG2 VAL 1672 | 41.358 | 101.584 | 111.024 | 0.00 | 0.00 |
| ATOM 25109 | 3HG2 VAL 1672 | 41.762 | 100.707 | 112.577 | 0.00 | 0.00 |

|      |       |     |     |      |        |         |         |      |      |
|------|-------|-----|-----|------|--------|---------|---------|------|------|
| ATOM | 25110 | C   | VAL | 1672 | 41.091 | 101.483 | 114.925 | 0.00 | 0.00 |
| ATOM | 25111 | O   | VAL | 1672 | 42.235 | 101.215 | 115.414 | 0.00 | 0.00 |
| ATOM | 25112 | N   | GLU | 1673 | 40.048 | 100.584 | 115.022 | 0.00 | 0.00 |
| ATOM | 25113 | H   | GLU | 1673 | 39.137 | 100.757 | 114.620 | 0.00 | 0.00 |
| ATOM | 25114 | CA  | GLU | 1673 | 40.115 | 99.257  | 115.739 | 0.00 | 0.00 |
| ATOM | 25115 | HA  | GLU | 1673 | 41.132 | 99.129  | 116.108 | 0.00 | 0.00 |
| ATOM | 25116 | CB  | GLU | 1673 | 39.208 | 99.219  | 117.020 | 0.00 | 0.00 |
| ATOM | 25117 | HB2 | GLU | 1673 | 39.481 | 98.312  | 117.560 | 0.00 | 0.00 |
| ATOM | 25118 | HB3 | GLU | 1673 | 39.260 | 100.092 | 117.672 | 0.00 | 0.00 |
| ATOM | 25119 | CG  | GLU | 1673 | 37.730 | 98.936  | 116.665 | 0.00 | 0.00 |
| ATOM | 25120 | HG2 | GLU | 1673 | 37.363 | 99.813  | 116.131 | 0.00 | 0.00 |
| ATOM | 25121 | HG3 | GLU | 1673 | 37.568 | 98.104  | 115.979 | 0.00 | 0.00 |
| ATOM | 25122 | CD  | GLU | 1673 | 36.938 | 98.622  | 117.938 | 0.00 | 0.00 |
| ATOM | 25123 | OE1 | GLU | 1673 | 36.131 | 99.487  | 118.419 | 0.00 | 0.00 |
| ATOM | 25124 | OE2 | GLU | 1673 | 37.005 | 97.531  | 118.465 | 0.00 | 0.00 |
| ATOM | 25125 | C   | GLU | 1673 | 39.789 | 98.145  | 114.750 | 0.00 | 0.00 |
| ATOM | 25126 | O   | GLU | 1673 | 38.870 | 98.233  | 113.893 | 0.00 | 0.00 |
| ATOM | 25127 | N   | ASN | 1674 | 40.571 | 97.067  | 114.755 | 0.00 | 0.00 |
| ATOM | 25128 | H   | ASN | 1674 | 41.240 | 97.052  | 115.511 | 0.00 | 0.00 |
| ATOM | 25129 | CA  | ASN | 1674 | 40.205 | 95.811  | 114.136 | 0.00 | 0.00 |
| ATOM | 25130 | HA  | ASN | 1674 | 39.926 | 95.959  | 113.093 | 0.00 | 0.00 |
| ATOM | 25131 | CB  | ASN | 1674 | 41.452 | 94.883  | 113.976 | 0.00 | 0.00 |
| ATOM | 25132 | HB2 | ASN | 1674 | 42.194 | 95.354  | 113.332 | 0.00 | 0.00 |
| ATOM | 25133 | HB3 | ASN | 1674 | 41.910 | 94.743  | 114.955 | 0.00 | 0.00 |
| ATOM | 25134 | CG  | ASN | 1674 | 41.092 | 93.585  | 113.257 | 0.00 | 0.00 |
| ATOM | 25135 | OD1 | ASN | 1674 | 39.942 | 93.259  | 113.055 | 0.00 | 0.00 |

|      |       |      |     |      |        |        |         |      |      |
|------|-------|------|-----|------|--------|--------|---------|------|------|
| ATOM | 25136 | ND2  | ASN | 1674 | 42.062 | 92.847 | 112.709 | 0.00 | 0.00 |
| ATOM | 25137 | 1HD2 | ASN | 1674 | 41.811 | 92.041 | 112.154 | 0.00 | 0.00 |
| ATOM | 25138 | 2HD2 | ASN | 1674 | 43.040 | 93.057 | 112.848 | 0.00 | 0.00 |
| ATOM | 25139 | C    | ASN | 1674 | 39.100 | 95.072 | 114.814 | 0.00 | 0.00 |
| ATOM | 25140 | O    | ASN | 1674 | 39.351 | 94.453 | 115.847 | 0.00 | 0.00 |
| ATOM | 25141 | N    | HID | 1675 | 37.903 | 95.160 | 114.278 | 0.00 | 0.00 |
| ATOM | 25142 | H    | HID | 1675 | 37.882 | 95.685 | 113.416 | 0.00 | 0.00 |
| ATOM | 25143 | CA   | HID | 1675 | 36.667 | 94.755 | 114.923 | 0.00 | 0.00 |
| ATOM | 25144 | HA   | HID | 1675 | 36.934 | 94.623 | 115.972 | 0.00 | 0.00 |
| ATOM | 25145 | CB   | HID | 1675 | 35.609 | 95.868 | 114.768 | 0.00 | 0.00 |
| ATOM | 25146 | HB2  | HID | 1675 | 36.177 | 96.799 | 114.777 | 0.00 | 0.00 |
| ATOM | 25147 | HB3  | HID | 1675 | 35.136 | 95.805 | 113.788 | 0.00 | 0.00 |
| ATOM | 25148 | CG   | HID | 1675 | 34.557 | 95.737 | 115.915 | 0.00 | 0.00 |
| ATOM | 25149 | ND1  | HID | 1675 | 34.707 | 96.236 | 117.177 | 0.00 | 0.00 |
| ATOM | 25150 | HD1  | HID | 1675 | 35.426 | 96.830 | 117.564 | 0.00 | 0.00 |
| ATOM | 25151 | CE1  | HID | 1675 | 33.561 | 95.994 | 117.869 | 0.00 | 0.00 |
| ATOM | 25152 | HE1  | HID | 1675 | 33.443 | 96.295 | 118.899 | 0.00 | 0.00 |
| ATOM | 25153 | NE2  | HID | 1675 | 32.622 | 95.413 | 117.078 | 0.00 | 0.00 |
| ATOM | 25154 | CD2  | HID | 1675 | 33.273 | 95.163 | 115.881 | 0.00 | 0.00 |
| ATOM | 25155 | HD2  | HID | 1675 | 32.953 | 94.663 | 114.978 | 0.00 | 0.00 |
| ATOM | 25156 | C    | HID | 1675 | 36.151 | 93.364 | 114.404 | 0.00 | 0.00 |
| ATOM | 25157 | O    | HID | 1675 | 35.048 | 93.184 | 113.919 | 0.00 | 0.00 |
| ATOM | 25158 | N    | GLY | 1676 | 37.070 | 92.395 | 114.381 | 0.00 | 0.00 |
| ATOM | 25159 | H    | GLY | 1676 | 38.001 | 92.643 | 114.683 | 0.00 | 0.00 |
| ATOM | 25160 | CA   | GLY | 1676 | 36.990 | 90.923 | 114.079 | 0.00 | 0.00 |
| ATOM | 25161 | HA2  | GLY | 1676 | 36.237 | 90.502 | 114.746 | 0.00 | 0.00 |

|      |       |     |     |      |        |        |         |      |      |
|------|-------|-----|-----|------|--------|--------|---------|------|------|
| ATOM | 25162 | HA3 | GLY | 1676 | 36.719 | 90.737 | 113.040 | 0.00 | 0.00 |
| ATOM | 25163 | C   | GLY | 1676 | 38.261 | 90.186 | 114.300 | 0.00 | 0.00 |
| ATOM | 25164 | O   | GLY | 1676 | 39.216 | 90.648 | 114.966 | 0.00 | 0.00 |
| ATOM | 25165 | N   | ASP | 1677 | 38.209 | 88.941 | 113.983 | 0.00 | 0.00 |
| ATOM | 25166 | H   | ASP | 1677 | 37.452 | 88.621 | 113.395 | 0.00 | 0.00 |
| ATOM | 25167 | CA  | ASP | 1677 | 39.040 | 87.855 | 114.433 | 0.00 | 0.00 |
| ATOM | 25168 | HA  | ASP | 1677 | 39.539 | 88.151 | 115.356 | 0.00 | 0.00 |
| ATOM | 25169 | CB  | ASP | 1677 | 38.111 | 86.639 | 114.786 | 0.00 | 0.00 |
| ATOM | 25170 | HB2 | ASP | 1677 | 37.303 | 86.977 | 115.434 | 0.00 | 0.00 |
| ATOM | 25171 | HB3 | ASP | 1677 | 37.818 | 86.186 | 113.839 | 0.00 | 0.00 |
| ATOM | 25172 | CG  | ASP | 1677 | 38.774 | 85.607 | 115.654 | 0.00 | 0.00 |
| ATOM | 25173 | OD1 | ASP | 1677 | 39.609 | 86.030 | 116.517 | 0.00 | 0.00 |
| ATOM | 25174 | OD2 | ASP | 1677 | 38.482 | 84.418 | 115.581 | 0.00 | 0.00 |
| ATOM | 25175 | C   | ASP | 1677 | 40.152 | 87.481 | 113.434 | 0.00 | 0.00 |
| ATOM | 25176 | O   | ASP | 1677 | 40.872 | 86.495 | 113.630 | 0.00 | 0.00 |
| ATOM | 25177 | N   | ARG | 1678 | 40.288 | 88.238 | 112.349 | 0.00 | 0.00 |
| ATOM | 25178 | H   | ARG | 1678 | 39.729 | 89.070 | 112.223 | 0.00 | 0.00 |
| ATOM | 25179 | CA  | ARG | 1678 | 41.365 | 88.064 | 111.254 | 0.00 | 0.00 |
| ATOM | 25180 | HA  | ARG | 1678 | 41.897 | 87.132 | 111.445 | 0.00 | 0.00 |
| ATOM | 25181 | CB  | ARG | 1678 | 40.677 | 87.809 | 109.921 | 0.00 | 0.00 |
| ATOM | 25182 | HB2 | ARG | 1678 | 40.055 | 88.692 | 109.776 | 0.00 | 0.00 |
| ATOM | 25183 | HB3 | ARG | 1678 | 41.488 | 87.896 | 109.198 | 0.00 | 0.00 |
| ATOM | 25184 | CG  | ARG | 1678 | 39.818 | 86.527 | 109.889 | 0.00 | 0.00 |
| ATOM | 25185 | HG2 | ARG | 1678 | 40.435 | 85.644 | 110.055 | 0.00 | 0.00 |
| ATOM | 25186 | HG3 | ARG | 1678 | 39.058 | 86.566 | 110.670 | 0.00 | 0.00 |
| ATOM | 25187 | CD  | ARG | 1678 | 39.078 | 86.208 | 108.565 | 0.00 | 0.00 |

|      |       |      |     |      |        |        |         |      |      |
|------|-------|------|-----|------|--------|--------|---------|------|------|
| ATOM | 25188 | HD2  | ARG | 1678 | 39.729 | 86.371 | 107.706 | 0.00 | 0.00 |
| ATOM | 25189 | HD3  | ARG | 1678 | 38.852 | 85.151 | 108.425 | 0.00 | 0.00 |
| ATOM | 25190 | NE   | ARG | 1678 | 37.930 | 86.990 | 108.651 | 0.00 | 0.00 |
| ATOM | 25191 | HE   | ARG | 1678 | 37.778 | 87.572 | 109.463 | 0.00 | 0.00 |
| ATOM | 25192 | CZ   | ARG | 1678 | 36.887 | 87.006 | 107.868 | 0.00 | 0.00 |
| ATOM | 25193 | NH1  | ARG | 1678 | 36.648 | 86.194 | 106.889 | 0.00 | 0.00 |
| ATOM | 25194 | 1HH1 | ARG | 1678 | 36.038 | 86.559 | 106.172 | 0.00 | 0.00 |
| ATOM | 25195 | 2HH1 | ARG | 1678 | 37.302 | 85.471 | 106.625 | 0.00 | 0.00 |
| ATOM | 25196 | NH2  | ARG | 1678 | 35.978 | 87.897 | 108.088 | 0.00 | 0.00 |
| ATOM | 25197 | 1HH2 | ARG | 1678 | 35.290 | 88.048 | 107.364 | 0.00 | 0.00 |
| ATOM | 25198 | 2HH2 | ARG | 1678 | 36.125 | 88.627 | 108.771 | 0.00 | 0.00 |
| ATOM | 25199 | C    | ARG | 1678 | 42.311 | 89.265 | 111.197 | 0.00 | 0.00 |
| ATOM | 25200 | O    | ARG | 1678 | 41.831 | 90.419 | 111.419 | 0.00 | 0.00 |
| ATOM | 25201 | N    | PRO | 1679 | 43.621 | 89.142 | 110.951 | 0.00 | 0.00 |
| ATOM | 25202 | CD   | PRO | 1679 | 44.403 | 87.936 | 110.705 | 0.00 | 0.00 |
| ATOM | 25203 | HD2  | PRO | 1679 | 44.367 | 87.405 | 111.656 | 0.00 | 0.00 |
| ATOM | 25204 | HD3  | PRO | 1679 | 43.990 | 87.286 | 109.934 | 0.00 | 0.00 |
| ATOM | 25205 | CG   | PRO | 1679 | 45.781 | 88.373 | 110.162 | 0.00 | 0.00 |
| ATOM | 25206 | HG2  | PRO | 1679 | 46.518 | 87.699 | 110.598 | 0.00 | 0.00 |
| ATOM | 25207 | HG3  | PRO | 1679 | 45.727 | 88.388 | 109.074 | 0.00 | 0.00 |
| ATOM | 25208 | CB   | PRO | 1679 | 45.994 | 89.770 | 110.764 | 0.00 | 0.00 |
| ATOM | 25209 | HB2  | PRO | 1679 | 46.413 | 89.569 | 111.750 | 0.00 | 0.00 |
| ATOM | 25210 | HB3  | PRO | 1679 | 46.722 | 90.373 | 110.221 | 0.00 | 0.00 |
| ATOM | 25211 | CA   | PRO | 1679 | 44.523 | 90.290 | 110.818 | 0.00 | 0.00 |
| ATOM | 25212 | HA   | PRO | 1679 | 44.437 | 90.891 | 111.724 | 0.00 | 0.00 |
| ATOM | 25213 | C    | PRO | 1679 | 44.170 | 90.992 | 109.486 | 0.00 | 0.00 |

|      |       |      |     |      |        |        |         |      |      |
|------|-------|------|-----|------|--------|--------|---------|------|------|
| ATOM | 25214 | O    | PRO | 1679 | 43.626 | 90.423 | 108.498 | 0.00 | 0.00 |
| ATOM | 25215 | N    | ILE | 1680 | 44.416 | 92.266 | 109.445 | 0.00 | 0.00 |
| ATOM | 25216 | H    | ILE | 1680 | 44.812 | 92.624 | 110.303 | 0.00 | 0.00 |
| ATOM | 25217 | CA   | ILE | 1680 | 44.718 | 92.986 | 108.198 | 0.00 | 0.00 |
| ATOM | 25218 | HA   | ILE | 1680 | 44.670 | 92.321 | 107.335 | 0.00 | 0.00 |
| ATOM | 25219 | CB   | ILE | 1680 | 43.655 | 94.123 | 107.985 | 0.00 | 0.00 |
| ATOM | 25220 | HB   | ILE | 1680 | 43.675 | 94.809 | 108.832 | 0.00 | 0.00 |
| ATOM | 25221 | CG2  | ILE | 1680 | 43.825 | 95.008 | 106.721 | 0.00 | 0.00 |
| ATOM | 25222 | 1HG2 | ILE | 1680 | 42.816 | 95.313 | 106.441 | 0.00 | 0.00 |
| ATOM | 25223 | 2HG2 | ILE | 1680 | 44.399 | 95.887 | 107.016 | 0.00 | 0.00 |
| ATOM | 25224 | 3HG2 | ILE | 1680 | 44.226 | 94.526 | 105.830 | 0.00 | 0.00 |
| ATOM | 25225 | CG1  | ILE | 1680 | 42.261 | 93.388 | 107.997 | 0.00 | 0.00 |
| ATOM | 25226 | 2HG1 | ILE | 1680 | 41.596 | 93.885 | 107.291 | 0.00 | 0.00 |
| ATOM | 25227 | 3HG1 | ILE | 1680 | 42.238 | 92.351 | 107.661 | 0.00 | 0.00 |
| ATOM | 25228 | CD1  | ILE | 1680 | 41.476 | 93.468 | 109.410 | 0.00 | 0.00 |
| ATOM | 25229 | 1HD1 | ILE | 1680 | 41.451 | 94.526 | 109.671 | 0.00 | 0.00 |
| ATOM | 25230 | 2HD1 | ILE | 1680 | 40.447 | 93.110 | 109.392 | 0.00 | 0.00 |
| ATOM | 25231 | 3HD1 | ILE | 1680 | 42.079 | 93.056 | 110.219 | 0.00 | 0.00 |
| ATOM | 25232 | C    | ILE | 1680 | 46.149 | 93.524 | 108.229 | 0.00 | 0.00 |
| ATOM | 25233 | O    | ILE | 1680 | 46.843 | 93.495 | 109.226 | 0.00 | 0.00 |
| ATOM | 25234 | N    | GLN | 1681 | 46.671 | 94.076 | 107.081 | 0.00 | 0.00 |
| ATOM | 25235 | H    | GLN | 1681 | 46.096 | 93.911 | 106.266 | 0.00 | 0.00 |
| ATOM | 25236 | CA   | GLN | 1681 | 47.888 | 94.860 | 107.084 | 0.00 | 0.00 |
| ATOM | 25237 | HA   | GLN | 1681 | 47.911 | 95.389 | 108.036 | 0.00 | 0.00 |
| ATOM | 25238 | CB   | GLN | 1681 | 49.047 | 93.812 | 106.837 | 0.00 | 0.00 |
| ATOM | 25239 | HB2  | GLN | 1681 | 49.085 | 93.078 | 107.641 | 0.00 | 0.00 |

|      |       |      |     |      |        |         |         |      |      |
|------|-------|------|-----|------|--------|---------|---------|------|------|
| ATOM | 25240 | HB3  | GLN | 1681 | 48.804 | 93.174  | 105.987 | 0.00 | 0.00 |
| ATOM | 25241 | CG   | GLN | 1681 | 50.471 | 94.458  | 106.669 | 0.00 | 0.00 |
| ATOM | 25242 | HG2  | GLN | 1681 | 50.424 | 94.765  | 105.624 | 0.00 | 0.00 |
| ATOM | 25243 | HG3  | GLN | 1681 | 50.730 | 95.232  | 107.391 | 0.00 | 0.00 |
| ATOM | 25244 | CD   | GLN | 1681 | 51.560 | 93.385  | 107.025 | 0.00 | 0.00 |
| ATOM | 25245 | OE1  | GLN | 1681 | 51.654 | 92.828  | 108.100 | 0.00 | 0.00 |
| ATOM | 25246 | NE2  | GLN | 1681 | 52.459 | 93.039  | 106.106 | 0.00 | 0.00 |
| ATOM | 25247 | 1HE2 | GLN | 1681 | 53.195 | 92.434  | 106.439 | 0.00 | 0.00 |
| ATOM | 25248 | 2HE2 | GLN | 1681 | 52.580 | 93.516  | 105.224 | 0.00 | 0.00 |
| ATOM | 25249 | C    | GLN | 1681 | 47.776 | 95.834  | 105.888 | 0.00 | 0.00 |
| ATOM | 25250 | O    | GLN | 1681 | 47.409 | 95.374  | 104.812 | 0.00 | 0.00 |
| ATOM | 25251 | N    | VAL | 1682 | 47.996 | 97.142  | 106.088 | 0.00 | 0.00 |
| ATOM | 25252 | H    | VAL | 1682 | 48.219 | 97.493  | 107.008 | 0.00 | 0.00 |
| ATOM | 25253 | CA   | VAL | 1682 | 48.056 | 98.121  | 105.027 | 0.00 | 0.00 |
| ATOM | 25254 | HA   | VAL | 1682 | 47.700 | 97.742  | 104.069 | 0.00 | 0.00 |
| ATOM | 25255 | CB   | VAL | 1682 | 47.084 | 99.218  | 105.406 | 0.00 | 0.00 |
| ATOM | 25256 | HB   | VAL | 1682 | 47.361 | 99.759  | 106.311 | 0.00 | 0.00 |
| ATOM | 25257 | CG1  | VAL | 1682 | 46.922 | 100.262 | 104.268 | 0.00 | 0.00 |
| ATOM | 25258 | 1HG1 | VAL | 1682 | 46.243 | 101.080 | 104.507 | 0.00 | 0.00 |
| ATOM | 25259 | 2HG1 | VAL | 1682 | 47.843 | 100.764 | 103.974 | 0.00 | 0.00 |
| ATOM | 25260 | 3HG1 | VAL | 1682 | 46.616 | 99.716  | 103.375 | 0.00 | 0.00 |
| ATOM | 25261 | CG2  | VAL | 1682 | 45.626 | 98.772  | 105.561 | 0.00 | 0.00 |
| ATOM | 25262 | 1HG2 | VAL | 1682 | 45.190 | 98.310  | 104.675 | 0.00 | 0.00 |
| ATOM | 25263 | 2HG2 | VAL | 1682 | 45.559 | 98.055  | 106.379 | 0.00 | 0.00 |
| ATOM | 25264 | 3HG2 | VAL | 1682 | 44.988 | 99.642  | 105.712 | 0.00 | 0.00 |
| ATOM | 25265 | C    | VAL | 1682 | 49.498 | 98.651  | 104.778 | 0.00 | 0.00 |

|      |       |     |     |      |        |         |         |      |      |
|------|-------|-----|-----|------|--------|---------|---------|------|------|
| ATOM | 25266 | O   | VAL | 1682 | 50.225 | 99.011  | 105.734 | 0.00 | 0.00 |
| ATOM | 25267 | N   | GLY | 1683 | 49.860 | 98.687  | 103.517 | 0.00 | 0.00 |
| ATOM | 25268 | H   | GLY | 1683 | 49.234 | 98.306  | 102.821 | 0.00 | 0.00 |
| ATOM | 25269 | CA  | GLY | 1683 | 51.075 | 99.196  | 102.861 | 0.00 | 0.00 |
| ATOM | 25270 | HA2 | GLY | 1683 | 52.022 | 98.807  | 103.235 | 0.00 | 0.00 |
| ATOM | 25271 | HA3 | GLY | 1683 | 51.090 | 98.781  | 101.853 | 0.00 | 0.00 |
| ATOM | 25272 | C   | GLY | 1683 | 51.119 | 100.702 | 102.615 | 0.00 | 0.00 |
| ATOM | 25273 | O   | GLY | 1683 | 50.099 | 101.405 | 102.833 | 0.00 | 0.00 |
| ATOM | 25274 | N   | SER | 1684 | 52.268 | 101.371 | 102.287 | 0.00 | 0.00 |
| ATOM | 25275 | H   | SER | 1684 | 53.092 | 100.790 | 102.334 | 0.00 | 0.00 |
| ATOM | 25276 | CA  | SER | 1684 | 52.363 | 102.804 | 102.510 | 0.00 | 0.00 |
| ATOM | 25277 | HA  | SER | 1684 | 51.990 | 102.998 | 103.516 | 0.00 | 0.00 |
| ATOM | 25278 | CB  | SER | 1684 | 53.798 | 103.332 | 102.402 | 0.00 | 0.00 |
| ATOM | 25279 | HB2 | SER | 1684 | 53.892 | 104.418 | 102.404 | 0.00 | 0.00 |
| ATOM | 25280 | HB3 | SER | 1684 | 54.347 | 102.900 | 103.239 | 0.00 | 0.00 |
| ATOM | 25281 | OG  | SER | 1684 | 54.373 | 102.960 | 101.136 | 0.00 | 0.00 |
| ATOM | 25282 | HG  | SER | 1684 | 54.150 | 103.622 | 100.478 | 0.00 | 0.00 |
| ATOM | 25283 | C   | SER | 1684 | 51.611 | 103.629 | 101.520 | 0.00 | 0.00 |
| ATOM | 25284 | O   | SER | 1684 | 51.172 | 104.692 | 101.877 | 0.00 | 0.00 |
| ATOM | 25285 | N   | HIE | 1685 | 51.508 | 103.196 | 100.285 | 0.00 | 0.00 |
| ATOM | 25286 | H   | HIE | 1685 | 51.909 | 102.279 | 100.151 | 0.00 | 0.00 |
| ATOM | 25287 | CA  | HIE | 1685 | 50.932 | 103.979 | 99.139  | 0.00 | 0.00 |
| ATOM | 25288 | HA  | HIE | 1685 | 50.878 | 105.052 | 99.323  | 0.00 | 0.00 |
| ATOM | 25289 | CB  | HIE | 1685 | 51.718 | 103.857 | 97.837  | 0.00 | 0.00 |
| ATOM | 25290 | HB2 | HIE | 1685 | 52.071 | 102.827 | 97.795  | 0.00 | 0.00 |
| ATOM | 25291 | HB3 | HIE | 1685 | 51.175 | 104.170 | 96.945  | 0.00 | 0.00 |



|      |       |     |     |      |        |         |         |      |      |
|------|-------|-----|-----|------|--------|---------|---------|------|------|
| ATOM | 25292 | CG  | HIE | 1685 | 52.981 | 104.736 | 97.941  | 0.00 | 0.00 |
| ATOM | 25293 | ND1 | HIE | 1685 | 54.059 | 104.589 | 98.861  | 0.00 | 0.00 |
| ATOM | 25294 | CE1 | HIE | 1685 | 54.794 | 105.727 | 98.577  | 0.00 | 0.00 |
| ATOM | 25295 | HE1 | HIE | 1685 | 55.579 | 106.185 | 99.160  | 0.00 | 0.00 |
| ATOM | 25296 | NE2 | HIE | 1685 | 54.258 | 106.494 | 97.627  | 0.00 | 0.00 |
| ATOM | 25297 | HE2 | HIE | 1685 | 54.641 | 107.383 | 97.341  | 0.00 | 0.00 |
| ATOM | 25298 | CD2 | HIE | 1685 | 53.149 | 105.878 | 97.168  | 0.00 | 0.00 |
| ATOM | 25299 | HD2 | HIE | 1685 | 52.469 | 106.191 | 96.389  | 0.00 | 0.00 |
| ATOM | 25300 | C   | HIE | 1685 | 49.435 | 103.667 | 98.913  | 0.00 | 0.00 |
| ATOM | 25301 | O   | HIE | 1685 | 48.853 | 104.201 | 98.015  | 0.00 | 0.00 |
| ATOM | 25302 | N   | TYR | 1686 | 48.811 | 102.765 | 99.720  | 0.00 | 0.00 |
| ATOM | 25303 | H   | TYR | 1686 | 49.395 | 102.281 | 100.387 | 0.00 | 0.00 |
| ATOM | 25304 | CA  | TYR | 1686 | 47.417 | 102.438 | 99.520  | 0.00 | 0.00 |
| ATOM | 25305 | HA  | TYR | 1686 | 47.243 | 102.395 | 98.445  | 0.00 | 0.00 |
| ATOM | 25306 | CB  | TYR | 1686 | 46.993 | 101.116 | 100.243 | 0.00 | 0.00 |
| ATOM | 25307 | HB2 | TYR | 1686 | 47.752 | 100.361 | 100.040 | 0.00 | 0.00 |
| ATOM | 25308 | HB3 | TYR | 1686 | 47.056 | 101.216 | 101.326 | 0.00 | 0.00 |
| ATOM | 25309 | CG  | TYR | 1686 | 45.609 | 100.468 | 100.067 | 0.00 | 0.00 |
| ATOM | 25310 | CD1 | TYR | 1686 | 45.505 | 99.290  | 99.267  | 0.00 | 0.00 |
| ATOM | 25311 | HD1 | TYR | 1686 | 46.321 | 98.846  | 98.715  | 0.00 | 0.00 |
| ATOM | 25312 | CE1 | TYR | 1686 | 44.307 | 98.669  | 99.170  | 0.00 | 0.00 |
| ATOM | 25313 | HE1 | TYR | 1686 | 44.243 | 97.692  | 98.713  | 0.00 | 0.00 |
| ATOM | 25314 | CZ  | TYR | 1686 | 43.098 | 99.231  | 99.641  | 0.00 | 0.00 |
| ATOM | 25315 | OH  | TYR | 1686 | 41.834 | 98.647  | 99.539  | 0.00 | 0.00 |
| ATOM | 25316 | HH  | TYR | 1686 | 41.135 | 99.100  | 100.016 | 0.00 | 0.00 |
| ATOM | 25317 | CE2 | TYR | 1686 | 43.208 | 100.447 | 100.333 | 0.00 | 0.00 |

|      |       |     |     |      |        |         |         |      |      |
|------|-------|-----|-----|------|--------|---------|---------|------|------|
| ATOM | 25318 | HE2 | TYR | 1686 | 42.273 | 100.891 | 100.642 | 0.00 | 0.00 |
| ATOM | 25319 | CD2 | TYR | 1686 | 44.457 | 101.024 | 100.628 | 0.00 | 0.00 |
| ATOM | 25320 | HD2 | TYR | 1686 | 44.512 | 101.947 | 101.187 | 0.00 | 0.00 |
| ATOM | 25321 | C   | TYR | 1686 | 46.397 | 103.550 | 99.943  | 0.00 | 0.00 |
| ATOM | 25322 | O   | TYR | 1686 | 46.568 | 104.097 | 101.024 | 0.00 | 0.00 |
| ATOM | 25323 | N   | HID | 1687 | 45.362 | 103.851 | 99.147  | 0.00 | 0.00 |
| ATOM | 25324 | H   | HID | 1687 | 45.214 | 103.347 | 98.285  | 0.00 | 0.00 |
| ATOM | 25325 | CA  | HID | 1687 | 44.299 | 104.811 | 99.585  | 0.00 | 0.00 |
| ATOM | 25326 | HA  | HID | 1687 | 44.788 | 105.737 | 99.886  | 0.00 | 0.00 |
| ATOM | 25327 | CB  | HID | 1687 | 43.425 | 105.227 | 98.355  | 0.00 | 0.00 |
| ATOM | 25328 | HB2 | HID | 1687 | 44.053 | 105.668 | 97.582  | 0.00 | 0.00 |
| ATOM | 25329 | HB3 | HID | 1687 | 42.905 | 104.354 | 97.959  | 0.00 | 0.00 |
| ATOM | 25330 | CG  | HID | 1687 | 42.291 | 106.197 | 98.634  | 0.00 | 0.00 |
| ATOM | 25331 | ND1 | HID | 1687 | 41.028 | 106.082 | 98.234  | 0.00 | 0.00 |
| ATOM | 25332 | HD1 | HID | 1687 | 40.645 | 105.386 | 97.611  | 0.00 | 0.00 |
| ATOM | 25333 | CE1 | HID | 1687 | 40.358 | 107.244 | 98.629  | 0.00 | 0.00 |
| ATOM | 25334 | HE1 | HID | 1687 | 39.291 | 107.409 | 98.648  | 0.00 | 0.00 |
| ATOM | 25335 | NE2 | HID | 1687 | 41.188 | 107.963 | 99.355  | 0.00 | 0.00 |
| ATOM | 25336 | CD2 | HID | 1687 | 42.411 | 107.354 | 99.346  | 0.00 | 0.00 |
| ATOM | 25337 | HD2 | HID | 1687 | 43.324 | 107.768 | 99.748  | 0.00 | 0.00 |
| ATOM | 25338 | C   | HID | 1687 | 43.418 | 104.284 | 100.697 | 0.00 | 0.00 |
| ATOM | 25339 | O   | HID | 1687 | 42.555 | 103.452 | 100.653 | 0.00 | 0.00 |
| ATOM | 25340 | N   | PHE | 1688 | 43.693 | 104.893 | 101.875 | 0.00 | 0.00 |
| ATOM | 25341 | H   | PHE | 1688 | 44.196 | 105.768 | 101.906 | 0.00 | 0.00 |
| ATOM | 25342 | CA  | PHE | 1688 | 43.241 | 104.332 | 103.180 | 0.00 | 0.00 |
| ATOM | 25343 | HA  | PHE | 1688 | 43.467 | 103.269 | 103.265 | 0.00 | 0.00 |

|      |       |     |     |      |        |         |         |      |      |
|------|-------|-----|-----|------|--------|---------|---------|------|------|
| ATOM | 25344 | CB  | PHE | 1688 | 44.001 | 105.032 | 104.322 | 0.00 | 0.00 |
| ATOM | 25345 | HB2 | PHE | 1688 | 43.673 | 106.071 | 104.302 | 0.00 | 0.00 |
| ATOM | 25346 | HB3 | PHE | 1688 | 45.044 | 104.920 | 104.026 | 0.00 | 0.00 |
| ATOM | 25347 | CG  | PHE | 1688 | 43.850 | 104.438 | 105.671 | 0.00 | 0.00 |
| ATOM | 25348 | CD1 | PHE | 1688 | 44.224 | 103.086 | 105.857 | 0.00 | 0.00 |
| ATOM | 25349 | HD1 | PHE | 1688 | 44.785 | 102.576 | 105.088 | 0.00 | 0.00 |
| ATOM | 25350 | CE1 | PHE | 1688 | 43.966 | 102.527 | 107.143 | 0.00 | 0.00 |
| ATOM | 25351 | HE1 | PHE | 1688 | 44.385 | 101.594 | 107.491 | 0.00 | 0.00 |
| ATOM | 25352 | CZ  | PHE | 1688 | 43.246 | 103.220 | 108.200 | 0.00 | 0.00 |
| ATOM | 25353 | HZ  | PHE | 1688 | 42.810 | 102.767 | 109.078 | 0.00 | 0.00 |
| ATOM | 25354 | CE2 | PHE | 1688 | 42.855 | 104.512 | 107.917 | 0.00 | 0.00 |
| ATOM | 25355 | HE2 | PHE | 1688 | 42.227 | 105.096 | 108.574 | 0.00 | 0.00 |
| ATOM | 25356 | CD2 | PHE | 1688 | 43.241 | 105.129 | 106.692 | 0.00 | 0.00 |
| ATOM | 25357 | HD2 | PHE | 1688 | 42.888 | 106.111 | 106.411 | 0.00 | 0.00 |
| ATOM | 25358 | C   | PHE | 1688 | 41.718 | 104.312 | 103.497 | 0.00 | 0.00 |
| ATOM | 25359 | O   | PHE | 1688 | 41.282 | 103.509 | 104.248 | 0.00 | 0.00 |
| ATOM | 25360 | N   | ALA | 1689 | 40.885 | 105.052 | 102.732 | 0.00 | 0.00 |
| ATOM | 25361 | H   | ALA | 1689 | 41.324 | 105.442 | 101.910 | 0.00 | 0.00 |
| ATOM | 25362 | CA  | ALA | 1689 | 39.455 | 105.057 | 102.823 | 0.00 | 0.00 |
| ATOM | 25363 | HA  | ALA | 1689 | 39.127 | 105.174 | 103.856 | 0.00 | 0.00 |
| ATOM | 25364 | CB  | ALA | 1689 | 38.861 | 106.289 | 102.051 | 0.00 | 0.00 |
| ATOM | 25365 | HB1 | ALA | 1689 | 39.329 | 106.443 | 101.078 | 0.00 | 0.00 |
| ATOM | 25366 | HB2 | ALA | 1689 | 37.781 | 106.239 | 101.908 | 0.00 | 0.00 |
| ATOM | 25367 | HB3 | ALA | 1689 | 39.042 | 107.141 | 102.705 | 0.00 | 0.00 |
| ATOM | 25368 | C   | ALA | 1689 | 38.832 | 103.785 | 102.234 | 0.00 | 0.00 |
| ATOM | 25369 | O   | ALA | 1689 | 37.655 | 103.521 | 102.533 | 0.00 | 0.00 |

|      |       |      |     |      |        |         |         |      |      |
|------|-------|------|-----|------|--------|---------|---------|------|------|
| ATOM | 25370 | N    | GLU | 1690 | 39.552 | 103.012 | 101.375 | 0.00 | 0.00 |
| ATOM | 25371 | H    | GLU | 1690 | 40.485 | 103.318 | 101.142 | 0.00 | 0.00 |
| ATOM | 25372 | CA   | GLU | 1690 | 39.131 | 101.783 | 100.753 | 0.00 | 0.00 |
| ATOM | 25373 | HA   | GLU | 1690 | 38.051 | 101.720 | 100.884 | 0.00 | 0.00 |
| ATOM | 25374 | CB   | GLU | 1690 | 39.464 | 101.925 | 99.206  | 0.00 | 0.00 |
| ATOM | 25375 | HB2  | GLU | 1690 | 40.473 | 102.273 | 98.986  | 0.00 | 0.00 |
| ATOM | 25376 | HB3  | GLU | 1690 | 39.273 | 101.008 | 98.648  | 0.00 | 0.00 |
| ATOM | 25377 | CG   | GLU | 1690 | 38.477 | 102.975 | 98.628  | 0.00 | 0.00 |
| ATOM | 25378 | HG2  | GLU | 1690 | 37.551 | 102.427 | 98.800  | 0.00 | 0.00 |
| ATOM | 25379 | HG3  | GLU | 1690 | 38.464 | 103.944 | 99.127  | 0.00 | 0.00 |
| ATOM | 25380 | CD   | GLU | 1690 | 38.705 | 103.332 | 97.165  | 0.00 | 0.00 |
| ATOM | 25381 | OE1  | GLU | 1690 | 39.180 | 104.449 | 96.849  | 0.00 | 0.00 |
| ATOM | 25382 | OE2  | GLU | 1690 | 38.206 | 102.561 | 96.334  | 0.00 | 0.00 |
| ATOM | 25383 | C    | GLU | 1690 | 39.689 | 100.444 | 101.433 | 0.00 | 0.00 |
| ATOM | 25384 | O    | GLU | 1690 | 39.688 | 99.348  | 100.826 | 0.00 | 0.00 |
| ATOM | 25385 | N    | VAL | 1691 | 40.130 | 100.605 | 102.682 | 0.00 | 0.00 |
| ATOM | 25386 | H    | VAL | 1691 | 40.185 | 101.528 | 103.089 | 0.00 | 0.00 |
| ATOM | 25387 | CA   | VAL | 1691 | 40.603 | 99.443  | 103.458 | 0.00 | 0.00 |
| ATOM | 25388 | HA   | VAL | 1691 | 41.360 | 98.919  | 102.874 | 0.00 | 0.00 |
| ATOM | 25389 | CB   | VAL | 1691 | 41.425 | 99.707  | 104.767 | 0.00 | 0.00 |
| ATOM | 25390 | HB   | VAL | 1691 | 41.601 | 98.753  | 105.264 | 0.00 | 0.00 |
| ATOM | 25391 | CG1  | VAL | 1691 | 42.749 | 100.200 | 104.323 | 0.00 | 0.00 |
| ATOM | 25392 | 1HG1 | VAL | 1691 | 43.106 | 99.257  | 103.908 | 0.00 | 0.00 |
| ATOM | 25393 | 2HG1 | VAL | 1691 | 42.777 | 101.025 | 103.612 | 0.00 | 0.00 |
| ATOM | 25394 | 3HG1 | VAL | 1691 | 43.310 | 100.436 | 105.227 | 0.00 | 0.00 |
| ATOM | 25395 | CG2  | VAL | 1691 | 40.693 | 100.657 | 105.734 | 0.00 | 0.00 |

|      |       |      |     |      |        |         |         |      |      |
|------|-------|------|-----|------|--------|---------|---------|------|------|
| ATOM | 25396 | 1HG2 | VAL | 1691 | 39.859 | 100.140 | 106.209 | 0.00 | 0.00 |
| ATOM | 25397 | 2HG2 | VAL | 1691 | 41.332 | 101.069 | 106.515 | 0.00 | 0.00 |
| ATOM | 25398 | 3HG2 | VAL | 1691 | 40.304 | 101.456 | 105.104 | 0.00 | 0.00 |
| ATOM | 25399 | C    | VAL | 1691 | 39.407 | 98.444  | 103.706 | 0.00 | 0.00 |
| ATOM | 25400 | O    | VAL | 1691 | 38.247 | 98.753  | 103.705 | 0.00 | 0.00 |
| ATOM | 25401 | N    | ASN | 1692 | 39.769 | 97.167  | 104.026 | 0.00 | 0.00 |
| ATOM | 25402 | H    | ASN | 1692 | 40.714 | 96.873  | 103.824 | 0.00 | 0.00 |
| ATOM | 25403 | CA   | ASN | 1692 | 38.945 | 96.116  | 104.548 | 0.00 | 0.00 |
| ATOM | 25404 | HA   | ASN | 1692 | 38.466 | 95.524  | 103.769 | 0.00 | 0.00 |
| ATOM | 25405 | CB   | ASN | 1692 | 39.921 | 95.189  | 105.333 | 0.00 | 0.00 |
| ATOM | 25406 | HB2  | ASN | 1692 | 40.712 | 94.850  | 104.664 | 0.00 | 0.00 |
| ATOM | 25407 | HB3  | ASN | 1692 | 40.401 | 95.730  | 106.149 | 0.00 | 0.00 |
| ATOM | 25408 | CG   | ASN | 1692 | 39.159 | 93.912  | 105.822 | 0.00 | 0.00 |
| ATOM | 25409 | OD1  | ASN | 1692 | 37.956 | 93.884  | 106.108 | 0.00 | 0.00 |
| ATOM | 25410 | ND2  | ASN | 1692 | 39.921 | 92.874  | 105.870 | 0.00 | 0.00 |
| ATOM | 25411 | 1HD2 | ASN | 1692 | 39.380 | 92.072  | 106.160 | 0.00 | 0.00 |
| ATOM | 25412 | 2HD2 | ASN | 1692 | 40.918 | 92.902  | 105.712 | 0.00 | 0.00 |
| ATOM | 25413 | C    | ASN | 1692 | 37.863 | 96.647  | 105.435 | 0.00 | 0.00 |
| ATOM | 25414 | O    | ASN | 1692 | 38.270 | 97.263  | 106.437 | 0.00 | 0.00 |
| ATOM | 25415 | N    | PRO | 1693 | 36.548 | 96.434  | 105.159 | 0.00 | 0.00 |
| ATOM | 25416 | CD   | PRO | 1693 | 35.989 | 96.213  | 103.771 | 0.00 | 0.00 |
| ATOM | 25417 | HD2  | PRO | 1693 | 36.572 | 96.790  | 103.053 | 0.00 | 0.00 |
| ATOM | 25418 | HD3  | PRO | 1693 | 35.968 | 95.148  | 103.542 | 0.00 | 0.00 |
| ATOM | 25419 | CG   | PRO | 1693 | 34.541 | 96.677  | 103.824 | 0.00 | 0.00 |
| ATOM | 25420 | HG2  | PRO | 1693 | 34.513 | 97.731  | 103.550 | 0.00 | 0.00 |
| ATOM | 25421 | HG3  | PRO | 1693 | 33.985 | 95.994  | 103.182 | 0.00 | 0.00 |

|            |         |      |        |        |         |      |      |
|------------|---------|------|--------|--------|---------|------|------|
| ATOM 25422 | CB PRO  | 1693 | 34.197 | 96.579 | 105.306 | 0.00 | 0.00 |
| ATOM 25423 | HB2 PRO | 1693 | 33.337 | 97.223 | 105.491 | 0.00 | 0.00 |
| ATOM 25424 | HB3 PRO | 1693 | 33.889 | 95.581 | 105.617 | 0.00 | 0.00 |
| ATOM 25425 | CA PRO  | 1693 | 35.486 | 96.956 | 105.983 | 0.00 | 0.00 |
| ATOM 25426 | HA PRO  | 1693 | 35.613 | 98.039 | 105.998 | 0.00 | 0.00 |
| ATOM 25427 | C PRO   | 1693 | 35.580 | 96.518 | 107.521 | 0.00 | 0.00 |
| ATOM 25428 | O PRO   | 1693 | 34.779 | 97.014 | 108.278 | 0.00 | 0.00 |
| ATOM 25429 | N ALA   | 1694 | 36.348 | 95.489 | 107.946 | 0.00 | 0.00 |
| ATOM 25430 | H ALA   | 1694 | 37.063 | 95.123 | 107.334 | 0.00 | 0.00 |
| ATOM 25431 | CA ALA  | 1694 | 36.503 | 95.105 | 109.336 | 0.00 | 0.00 |
| ATOM 25432 | HA ALA  | 1694 | 35.492 | 94.866 | 109.664 | 0.00 | 0.00 |
| ATOM 25433 | CB ALA  | 1694 | 37.242 | 93.768 | 109.389 | 0.00 | 0.00 |
| ATOM 25434 | HB1 ALA | 1694 | 38.179 | 93.880 | 108.844 | 0.00 | 0.00 |
| ATOM 25435 | HB2 ALA | 1694 | 37.474 | 93.321 | 110.355 | 0.00 | 0.00 |
| ATOM 25436 | HB3 ALA | 1694 | 36.747 | 92.976 | 108.826 | 0.00 | 0.00 |
| ATOM 25437 | C ALA   | 1694 | 37.182 | 96.161 | 110.206 | 0.00 | 0.00 |
| ATOM 25438 | O ALA   | 1694 | 36.996 | 96.129 | 111.391 | 0.00 | 0.00 |
| ATOM 25439 | N LEU   | 1695 | 37.946 | 97.008 | 109.553 | 0.00 | 0.00 |
| ATOM 25440 | H LEU   | 1695 | 37.806 | 97.016 | 108.553 | 0.00 | 0.00 |
| ATOM 25441 | CA LEU  | 1695 | 38.636 | 98.146 | 110.141 | 0.00 | 0.00 |
| ATOM 25442 | HA LEU  | 1695 | 39.047 | 97.896 | 111.119 | 0.00 | 0.00 |
| ATOM 25443 | CB LEU  | 1695 | 39.785 | 98.541 | 109.273 | 0.00 | 0.00 |
| ATOM 25444 | HB2 LEU | 1695 | 39.409 | 98.608 | 108.252 | 0.00 | 0.00 |
| ATOM 25445 | HB3 LEU | 1695 | 40.115 | 99.524 | 109.610 | 0.00 | 0.00 |
| ATOM 25446 | CG LEU  | 1695 | 40.970 | 97.594 | 109.319 | 0.00 | 0.00 |
| ATOM 25447 | HG LEU  | 1695 | 40.677 | 96.755 | 108.688 | 0.00 | 0.00 |

|      |       |      |     |      |        |         |         |      |      |
|------|-------|------|-----|------|--------|---------|---------|------|------|
| ATOM | 25448 | CD1  | LEU | 1695 | 42.156 | 98.293  | 108.678 | 0.00 | 0.00 |
| ATOM | 25449 | 1HD1 | LEU | 1695 | 42.706 | 99.004  | 109.295 | 0.00 | 0.00 |
| ATOM | 25450 | 2HD1 | LEU | 1695 | 42.797 | 97.507  | 108.280 | 0.00 | 0.00 |
| ATOM | 25451 | 3HD1 | LEU | 1695 | 41.897 | 98.899  | 107.810 | 0.00 | 0.00 |
| ATOM | 25452 | CD2  | LEU | 1695 | 41.324 | 97.063  | 110.714 | 0.00 | 0.00 |
| ATOM | 25453 | 1HD2 | LEU | 1695 | 42.296 | 96.581  | 110.609 | 0.00 | 0.00 |
| ATOM | 25454 | 2HD2 | LEU | 1695 | 41.520 | 97.932  | 111.342 | 0.00 | 0.00 |
| ATOM | 25455 | 3HD2 | LEU | 1695 | 40.516 | 96.464  | 111.133 | 0.00 | 0.00 |
| ATOM | 25456 | C    | LEU | 1695 | 37.584 | 99.250  | 110.462 | 0.00 | 0.00 |
| ATOM | 25457 | O    | LEU | 1695 | 37.157 | 99.974  | 109.536 | 0.00 | 0.00 |
| ATOM | 25458 | N    | LYS | 1696 | 37.192 | 99.453  | 111.750 | 0.00 | 0.00 |
| ATOM | 25459 | H    | LYS | 1696 | 37.754 | 99.083  | 112.503 | 0.00 | 0.00 |
| ATOM | 25460 | CA   | LYS | 1696 | 36.128 | 100.373 | 112.182 | 0.00 | 0.00 |
| ATOM | 25461 | HA   | LYS | 1696 | 35.318 | 100.526 | 111.469 | 0.00 | 0.00 |
| ATOM | 25462 | CB   | LYS | 1696 | 35.398 | 99.734  | 113.416 | 0.00 | 0.00 |
| ATOM | 25463 | HB2  | LYS | 1696 | 35.004 | 98.803  | 113.009 | 0.00 | 0.00 |
| ATOM | 25464 | HB3  | LYS | 1696 | 36.148 | 99.536  | 114.181 | 0.00 | 0.00 |
| ATOM | 25465 | CG   | LYS | 1696 | 34.177 | 100.558 | 113.938 | 0.00 | 0.00 |
| ATOM | 25466 | HG2  | LYS | 1696 | 34.446 | 101.520 | 114.374 | 0.00 | 0.00 |
| ATOM | 25467 | HG3  | LYS | 1696 | 33.582 | 100.773 | 113.050 | 0.00 | 0.00 |
| ATOM | 25468 | CD   | LYS | 1696 | 33.316 | 99.834  | 114.972 | 0.00 | 0.00 |
| ATOM | 25469 | HD2  | LYS | 1696 | 32.994 | 98.840  | 114.660 | 0.00 | 0.00 |
| ATOM | 25470 | HD3  | LYS | 1696 | 33.983 | 99.711  | 115.825 | 0.00 | 0.00 |
| ATOM | 25471 | CE   | LYS | 1696 | 32.130 | 100.742 | 115.347 | 0.00 | 0.00 |
| ATOM | 25472 | HE2  | LYS | 1696 | 32.544 | 101.706 | 115.642 | 0.00 | 0.00 |
| ATOM | 25473 | HE3  | LYS | 1696 | 31.392 | 100.752 | 114.545 | 0.00 | 0.00 |

|      |       |     |     |      |        |         |         |      |      |
|------|-------|-----|-----|------|--------|---------|---------|------|------|
| ATOM | 25474 | NZ  | LYS | 1696 | 31.535 | 100.267 | 116.610 | 0.00 | 0.00 |
| ATOM | 25475 | HZ1 | LYS | 1696 | 30.706 | 100.824 | 116.762 | 0.00 | 0.00 |
| ATOM | 25476 | HZ2 | LYS | 1696 | 31.298 | 99.286  | 116.619 | 0.00 | 0.00 |
| ATOM | 25477 | HZ3 | LYS | 1696 | 32.154 | 100.470 | 117.382 | 0.00 | 0.00 |
| ATOM | 25478 | C   | LYS | 1696 | 36.675 | 101.723 | 112.516 | 0.00 | 0.00 |
| ATOM | 25479 | O   | LYS | 1696 | 37.503 | 101.788 | 113.429 | 0.00 | 0.00 |
| ATOM | 25480 | N   | PHE | 1697 | 36.295 | 102.769 | 111.692 | 0.00 | 0.00 |
| ATOM | 25481 | H   | PHE | 1697 | 35.753 | 102.469 | 110.894 | 0.00 | 0.00 |
| ATOM | 25482 | CA  | PHE | 1697 | 36.597 | 104.225 | 111.731 | 0.00 | 0.00 |
| ATOM | 25483 | HA  | PHE | 1697 | 36.252 | 104.685 | 112.657 | 0.00 | 0.00 |
| ATOM | 25484 | CB  | PHE | 1697 | 38.096 | 104.546 | 111.533 | 0.00 | 0.00 |
| ATOM | 25485 | HB2 | PHE | 1697 | 38.284 | 105.602 | 111.730 | 0.00 | 0.00 |
| ATOM | 25486 | HB3 | PHE | 1697 | 38.609 | 103.923 | 112.266 | 0.00 | 0.00 |
| ATOM | 25487 | CG  | PHE | 1697 | 38.590 | 104.362 | 110.054 | 0.00 | 0.00 |
| ATOM | 25488 | CD1 | PHE | 1697 | 38.765 | 103.086 | 109.509 | 0.00 | 0.00 |
| ATOM | 25489 | HD1 | PHE | 1697 | 38.588 | 102.186 | 110.080 | 0.00 | 0.00 |
| ATOM | 25490 | CE1 | PHE | 1697 | 39.200 | 102.955 | 108.182 | 0.00 | 0.00 |
| ATOM | 25491 | HE1 | PHE | 1697 | 39.251 | 101.964 | 107.757 | 0.00 | 0.00 |
| ATOM | 25492 | CZ  | PHE | 1697 | 39.510 | 104.072 | 107.412 | 0.00 | 0.00 |
| ATOM | 25493 | HZ  | PHE | 1697 | 40.045 | 103.927 | 106.485 | 0.00 | 0.00 |
| ATOM | 25494 | CE2 | PHE | 1697 | 39.453 | 105.384 | 107.993 | 0.00 | 0.00 |
| ATOM | 25495 | HE2 | PHE | 1697 | 39.941 | 106.217 | 107.510 | 0.00 | 0.00 |
| ATOM | 25496 | CD2 | PHE | 1697 | 38.929 | 105.500 | 109.276 | 0.00 | 0.00 |
| ATOM | 25497 | HD2 | PHE | 1697 | 38.863 | 106.471 | 109.744 | 0.00 | 0.00 |
| ATOM | 25498 | C   | PHE | 1697 | 35.812 | 104.944 | 110.593 | 0.00 | 0.00 |
| ATOM | 25499 | O   | PHE | 1697 | 35.344 | 104.288 | 109.692 | 0.00 | 0.00 |



|      |       |     |     |      |        |         |         |      |      |
|------|-------|-----|-----|------|--------|---------|---------|------|------|
| ATOM | 25500 | N   | ASP | 1698 | 35.828 | 106.292 | 110.537 | 0.00 | 0.00 |
| ATOM | 25501 | H   | ASP | 1698 | 36.377 | 106.809 | 111.210 | 0.00 | 0.00 |
| ATOM | 25502 | CA  | ASP | 1698 | 35.081 | 107.045 | 109.512 | 0.00 | 0.00 |
| ATOM | 25503 | HA  | ASP | 1698 | 34.126 | 106.561 | 109.306 | 0.00 | 0.00 |
| ATOM | 25504 | CB  | ASP | 1698 | 34.614 | 108.381 | 110.071 | 0.00 | 0.00 |
| ATOM | 25505 | HB2 | ASP | 1698 | 33.799 | 108.172 | 110.764 | 0.00 | 0.00 |
| ATOM | 25506 | HB3 | ASP | 1698 | 35.409 | 108.860 | 110.642 | 0.00 | 0.00 |
| ATOM | 25507 | CG  | ASP | 1698 | 34.038 | 109.369 | 109.099 | 0.00 | 0.00 |
| ATOM | 25508 | OD1 | ASP | 1698 | 34.607 | 110.497 | 108.984 | 0.00 | 0.00 |
| ATOM | 25509 | OD2 | ASP | 1698 | 33.126 | 108.994 | 108.366 | 0.00 | 0.00 |
| ATOM | 25510 | C   | ASP | 1698 | 35.852 | 107.144 | 108.184 | 0.00 | 0.00 |
| ATOM | 25511 | O   | ASP | 1698 | 36.812 | 107.918 | 108.136 | 0.00 | 0.00 |
| ATOM | 25512 | N   | ARG | 1699 | 35.492 | 106.473 | 107.088 | 0.00 | 0.00 |
| ATOM | 25513 | H   | ARG | 1699 | 34.767 | 105.779 | 107.204 | 0.00 | 0.00 |
| ATOM | 25514 | CA  | ARG | 1699 | 36.318 | 106.399 | 105.814 | 0.00 | 0.00 |
| ATOM | 25515 | HA  | ARG | 1699 | 37.269 | 106.019 | 106.186 | 0.00 | 0.00 |
| ATOM | 25516 | CB  | ARG | 1699 | 35.607 | 105.333 | 104.839 | 0.00 | 0.00 |
| ATOM | 25517 | HB2 | ARG | 1699 | 34.548 | 105.581 | 104.771 | 0.00 | 0.00 |
| ATOM | 25518 | HB3 | ARG | 1699 | 35.974 | 105.431 | 103.817 | 0.00 | 0.00 |
| ATOM | 25519 | CG  | ARG | 1699 | 35.881 | 103.878 | 105.238 | 0.00 | 0.00 |
| ATOM | 25520 | HG2 | ARG | 1699 | 35.319 | 103.181 | 104.617 | 0.00 | 0.00 |
| ATOM | 25521 | HG3 | ARG | 1699 | 36.935 | 103.736 | 104.999 | 0.00 | 0.00 |
| ATOM | 25522 | CD  | ARG | 1699 | 35.635 | 103.481 | 106.643 | 0.00 | 0.00 |
| ATOM | 25523 | HD2 | ARG | 1699 | 36.329 | 103.998 | 107.306 | 0.00 | 0.00 |
| ATOM | 25524 | HD3 | ARG | 1699 | 34.641 | 103.803 | 106.954 | 0.00 | 0.00 |
| ATOM | 25525 | NE  | ARG | 1699 | 35.783 | 101.972 | 106.763 | 0.00 | 0.00 |

|      |       |      |     |      |        |         |         |      |      |
|------|-------|------|-----|------|--------|---------|---------|------|------|
| ATOM | 25526 | HE   | ARG | 1699 | 36.209 | 101.452 | 106.010 | 0.00 | 0.00 |
| ATOM | 25527 | CZ   | ARG | 1699 | 35.094 | 101.269 | 107.602 | 0.00 | 0.00 |
| ATOM | 25528 | NH1  | ARG | 1699 | 34.535 | 101.749 | 108.649 | 0.00 | 0.00 |
| ATOM | 25529 | 1HH1 | ARG | 1699 | 33.957 | 101.135 | 109.204 | 0.00 | 0.00 |
| ATOM | 25530 | 2HH1 | ARG | 1699 | 34.536 | 102.751 | 108.776 | 0.00 | 0.00 |
| ATOM | 25531 | NH2  | ARG | 1699 | 34.835 | 100.008 | 107.352 | 0.00 | 0.00 |
| ATOM | 25532 | 1HH2 | ARG | 1699 | 34.251 | 99.611  | 108.074 | 0.00 | 0.00 |
| ATOM | 25533 | 2HH2 | ARG | 1699 | 35.192 | 99.579  | 106.510 | 0.00 | 0.00 |
| ATOM | 25534 | C    | ARG | 1699 | 36.494 | 107.758 | 105.237 | 0.00 | 0.00 |
| ATOM | 25535 | O    | ARG | 1699 | 37.543 | 108.044 | 104.616 | 0.00 | 0.00 |
| ATOM | 25536 | N    | GLN | 1700 | 35.545 | 108.677 | 105.405 | 0.00 | 0.00 |
| ATOM | 25537 | H    | GLN | 1700 | 34.679 | 108.508 | 105.898 | 0.00 | 0.00 |
| ATOM | 25538 | CA   | GLN | 1700 | 35.694 | 109.989 | 104.779 | 0.00 | 0.00 |
| ATOM | 25539 | HA   | GLN | 1700 | 35.937 | 109.856 | 103.725 | 0.00 | 0.00 |
| ATOM | 25540 | CB   | GLN | 1700 | 34.399 | 110.850 | 105.010 | 0.00 | 0.00 |
| ATOM | 25541 | HB2  | GLN | 1700 | 33.541 | 110.246 | 104.718 | 0.00 | 0.00 |
| ATOM | 25542 | HB3  | GLN | 1700 | 34.468 | 111.179 | 106.047 | 0.00 | 0.00 |
| ATOM | 25543 | CG   | GLN | 1700 | 34.256 | 112.048 | 104.159 | 0.00 | 0.00 |
| ATOM | 25544 | HG2  | GLN | 1700 | 35.101 | 112.736 | 104.127 | 0.00 | 0.00 |
| ATOM | 25545 | HG3  | GLN | 1700 | 34.206 | 111.752 | 103.111 | 0.00 | 0.00 |
| ATOM | 25546 | CD   | GLN | 1700 | 32.881 | 112.796 | 104.333 | 0.00 | 0.00 |
| ATOM | 25547 | OE1  | GLN | 1700 | 32.149 | 112.702 | 105.325 | 0.00 | 0.00 |
| ATOM | 25548 | NE2  | GLN | 1700 | 32.552 | 113.614 | 103.378 | 0.00 | 0.00 |
| ATOM | 25549 | 1HE2 | GLN | 1700 | 31.695 | 114.148 | 103.415 | 0.00 | 0.00 |
| ATOM | 25550 | 2HE2 | GLN | 1700 | 33.294 | 113.954 | 102.783 | 0.00 | 0.00 |
| ATOM | 25551 | C    | GLN | 1700 | 36.826 | 110.849 | 105.367 | 0.00 | 0.00 |

|      |       |      |     |      |        |         |         |      |      |
|------|-------|------|-----|------|--------|---------|---------|------|------|
| ATOM | 25552 | O    | GLN | 1700 | 37.436 | 111.654 | 104.693 | 0.00 | 0.00 |
| ATOM | 25553 | N    | GLN | 1701 | 37.275 | 110.691 | 106.709 | 0.00 | 0.00 |
| ATOM | 25554 | H    | GLN | 1701 | 36.944 | 109.898 | 107.240 | 0.00 | 0.00 |
| ATOM | 25555 | CA   | GLN | 1701 | 38.454 | 111.355 | 107.191 | 0.00 | 0.00 |
| ATOM | 25556 | HA   | GLN | 1701 | 38.521 | 112.403 | 106.899 | 0.00 | 0.00 |
| ATOM | 25557 | CB   | GLN | 1701 | 38.365 | 111.352 | 108.623 | 0.00 | 0.00 |
| ATOM | 25558 | HB2  | GLN | 1701 | 38.162 | 110.332 | 108.947 | 0.00 | 0.00 |
| ATOM | 25559 | HB3  | GLN | 1701 | 39.285 | 111.668 | 109.115 | 0.00 | 0.00 |
| ATOM | 25560 | CG   | GLN | 1701 | 37.313 | 112.308 | 109.227 | 0.00 | 0.00 |
| ATOM | 25561 | HG2  | GLN | 1701 | 37.657 | 113.332 | 109.081 | 0.00 | 0.00 |
| ATOM | 25562 | HG3  | GLN | 1701 | 36.361 | 112.272 | 108.696 | 0.00 | 0.00 |
| ATOM | 25563 | CD   | GLN | 1701 | 37.069 | 112.218 | 110.724 | 0.00 | 0.00 |
| ATOM | 25564 | OE1  | GLN | 1701 | 37.887 | 112.636 | 111.536 | 0.00 | 0.00 |
| ATOM | 25565 | NE2  | GLN | 1701 | 35.945 | 111.585 | 111.122 | 0.00 | 0.00 |
| ATOM | 25566 | 1HE2 | GLN | 1701 | 35.719 | 111.593 | 112.106 | 0.00 | 0.00 |
| ATOM | 25567 | 2HE2 | GLN | 1701 | 35.307 | 111.303 | 110.392 | 0.00 | 0.00 |
| ATOM | 25568 | C    | GLN | 1701 | 39.761 | 110.698 | 106.764 | 0.00 | 0.00 |
| ATOM | 25569 | O    | GLN | 1701 | 40.814 | 111.174 | 107.216 | 0.00 | 0.00 |
| ATOM | 25570 | N    | ALA | 1702 | 39.769 | 109.662 | 105.848 | 0.00 | 0.00 |
| ATOM | 25571 | H    | ALA | 1702 | 38.913 | 109.220 | 105.545 | 0.00 | 0.00 |
| ATOM | 25572 | CA   | ALA | 1702 | 40.912 | 109.204 | 105.056 | 0.00 | 0.00 |
| ATOM | 25573 | HA   | ALA | 1702 | 41.834 | 109.641 | 105.439 | 0.00 | 0.00 |
| ATOM | 25574 | CB   | ALA | 1702 | 41.008 | 107.753 | 105.337 | 0.00 | 0.00 |
| ATOM | 25575 | HB1  | ALA | 1702 | 41.761 | 107.287 | 104.701 | 0.00 | 0.00 |
| ATOM | 25576 | HB2  | ALA | 1702 | 41.396 | 107.779 | 106.355 | 0.00 | 0.00 |
| ATOM | 25577 | HB3  | ALA | 1702 | 40.067 | 107.225 | 105.180 | 0.00 | 0.00 |

|      |       |     |     |      |        |         |         |      |      |
|------|-------|-----|-----|------|--------|---------|---------|------|------|
| ATOM | 25578 | C   | ALA | 1702 | 40.828 | 109.422 | 103.500 | 0.00 | 0.00 |
| ATOM | 25579 | O   | ALA | 1702 | 41.693 | 108.981 | 102.734 | 0.00 | 0.00 |
| ATOM | 25580 | N   | ALA | 1703 | 39.811 | 110.116 | 103.036 | 0.00 | 0.00 |
| ATOM | 25581 | H   | ALA | 1703 | 39.087 | 110.453 | 103.655 | 0.00 | 0.00 |
| ATOM | 25582 | CA  | ALA | 1703 | 39.486 | 110.333 | 101.577 | 0.00 | 0.00 |
| ATOM | 25583 | HA  | ALA | 1703 | 39.641 | 109.391 | 101.052 | 0.00 | 0.00 |
| ATOM | 25584 | CB  | ALA | 1703 | 37.999 | 110.766 | 101.460 | 0.00 | 0.00 |
| ATOM | 25585 | HB1 | ALA | 1703 | 37.253 | 110.077 | 101.856 | 0.00 | 0.00 |
| ATOM | 25586 | HB2 | ALA | 1703 | 37.894 | 111.729 | 101.960 | 0.00 | 0.00 |
| ATOM | 25587 | HB3 | ALA | 1703 | 37.871 | 110.950 | 100.394 | 0.00 | 0.00 |
| ATOM | 25588 | C   | ALA | 1703 | 40.543 | 111.269 | 101.022 | 0.00 | 0.00 |
| ATOM | 25589 | O   | ALA | 1703 | 40.754 | 112.315 | 101.470 | 0.00 | 0.00 |
| ATOM | 25590 | N   | GLY | 1704 | 41.173 | 110.819 | 99.930  | 0.00 | 0.00 |
| ATOM | 25591 | H   | GLY | 1704 | 40.893 | 109.915 | 99.576  | 0.00 | 0.00 |
| ATOM | 25592 | CA  | GLY | 1704 | 42.317 | 111.419 | 99.282  | 0.00 | 0.00 |
| ATOM | 25593 | HA2 | GLY | 1704 | 42.316 | 111.026 | 98.265  | 0.00 | 0.00 |
| ATOM | 25594 | HA3 | GLY | 1704 | 42.087 | 112.484 | 99.247  | 0.00 | 0.00 |
| ATOM | 25595 | C   | GLY | 1704 | 43.741 | 111.225 | 99.959  | 0.00 | 0.00 |
| ATOM | 25596 | O   | GLY | 1704 | 44.706 | 111.912 | 99.662  | 0.00 | 0.00 |
| ATOM | 25597 | N   | TYR | 1705 | 43.824 | 110.204 | 100.834 | 0.00 | 0.00 |
| ATOM | 25598 | H   | TYR | 1705 | 43.021 | 109.594 | 100.887 | 0.00 | 0.00 |
| ATOM | 25599 | CA  | TYR | 1705 | 45.025 | 110.021 | 101.707 | 0.00 | 0.00 |
| ATOM | 25600 | HA  | TYR | 1705 | 45.863 | 110.644 | 101.395 | 0.00 | 0.00 |
| ATOM | 25601 | CB  | TYR | 1705 | 44.614 | 110.401 | 103.122 | 0.00 | 0.00 |
| ATOM | 25602 | HB2 | TYR | 1705 | 43.654 | 109.936 | 103.345 | 0.00 | 0.00 |
| ATOM | 25603 | HB3 | TYR | 1705 | 45.321 | 109.875 | 103.763 | 0.00 | 0.00 |

|      |       |     |     |      |        |         |         |      |      |
|------|-------|-----|-----|------|--------|---------|---------|------|------|
| ATOM | 25604 | CG  | TYR | 1705 | 44.721 | 111.885 | 103.404 | 0.00 | 0.00 |
| ATOM | 25605 | CD1 | TYR | 1705 | 43.699 | 112.807 | 103.034 | 0.00 | 0.00 |
| ATOM | 25606 | HD1 | TYR | 1705 | 42.850 | 112.403 | 102.502 | 0.00 | 0.00 |
| ATOM | 25607 | CE1 | TYR | 1705 | 43.897 | 114.207 | 103.327 | 0.00 | 0.00 |
| ATOM | 25608 | HE1 | TYR | 1705 | 43.193 | 114.972 | 103.033 | 0.00 | 0.00 |
| ATOM | 25609 | CZ  | TYR | 1705 | 45.075 | 114.652 | 103.905 | 0.00 | 0.00 |
| ATOM | 25610 | OH  | TYR | 1705 | 45.123 | 115.928 | 104.238 | 0.00 | 0.00 |
| ATOM | 25611 | HH  | TYR | 1705 | 45.932 | 116.348 | 104.538 | 0.00 | 0.00 |
| ATOM | 25612 | CE2 | TYR | 1705 | 46.102 | 113.797 | 104.209 | 0.00 | 0.00 |
| ATOM | 25613 | HE2 | TYR | 1705 | 46.973 | 114.161 | 104.735 | 0.00 | 0.00 |
| ATOM | 25614 | CD2 | TYR | 1705 | 45.882 | 112.423 | 103.933 | 0.00 | 0.00 |
| ATOM | 25615 | HD2 | TYR | 1705 | 46.722 | 111.752 | 104.038 | 0.00 | 0.00 |
| ATOM | 25616 | C   | TYR | 1705 | 45.462 | 108.535 | 101.680 | 0.00 | 0.00 |
| ATOM | 25617 | O   | TYR | 1705 | 44.697 | 107.588 | 101.793 | 0.00 | 0.00 |
| ATOM | 25618 | N   | ARG | 1706 | 46.844 | 108.366 | 101.585 | 0.00 | 0.00 |
| ATOM | 25619 | H   | ARG | 1706 | 47.419 | 109.196 | 101.552 | 0.00 | 0.00 |
| ATOM | 25620 | CA  | ARG | 1706 | 47.459 | 107.026 | 101.843 | 0.00 | 0.00 |
| ATOM | 25621 | HA  | ARG | 1706 | 46.658 | 106.339 | 102.115 | 0.00 | 0.00 |
| ATOM | 25622 | CB  | ARG | 1706 | 48.154 | 106.602 | 100.522 | 0.00 | 0.00 |
| ATOM | 25623 | HB2 | ARG | 1706 | 48.675 | 105.649 | 100.616 | 0.00 | 0.00 |
| ATOM | 25624 | HB3 | ARG | 1706 | 47.354 | 106.391 | 99.811  | 0.00 | 0.00 |
| ATOM | 25625 | CG  | ARG | 1706 | 49.106 | 107.602 | 99.854  | 0.00 | 0.00 |
| ATOM | 25626 | HG2 | ARG | 1706 | 49.350 | 107.194 | 98.873  | 0.00 | 0.00 |
| ATOM | 25627 | HG3 | ARG | 1706 | 48.638 | 108.583 | 99.773  | 0.00 | 0.00 |
| ATOM | 25628 | CD  | ARG | 1706 | 50.400 | 107.734 | 100.723 | 0.00 | 0.00 |
| ATOM | 25629 | HD2 | ARG | 1706 | 50.158 | 108.376 | 101.570 | 0.00 | 0.00 |

|      |       |      |     |      |        |         |         |      |      |
|------|-------|------|-----|------|--------|---------|---------|------|------|
| ATOM | 25630 | HD3  | ARG | 1706 | 50.705 | 106.772 | 101.135 | 0.00 | 0.00 |
| ATOM | 25631 | NE   | ARG | 1706 | 51.547 | 108.412 | 100.043 | 0.00 | 0.00 |
| ATOM | 25632 | HE   | ARG | 1706 | 51.395 | 108.708 | 99.089  | 0.00 | 0.00 |
| ATOM | 25633 | CZ   | ARG | 1706 | 52.783 | 108.447 | 100.440 | 0.00 | 0.00 |
| ATOM | 25634 | NH1  | ARG | 1706 | 53.185 | 107.882 | 101.522 | 0.00 | 0.00 |
| ATOM | 25635 | 1HH1 | ARG | 1706 | 54.174 | 107.950 | 101.716 | 0.00 | 0.00 |
| ATOM | 25636 | 2HH1 | ARG | 1706 | 52.515 | 107.487 | 102.166 | 0.00 | 0.00 |
| ATOM | 25637 | NH2  | ARG | 1706 | 53.744 | 109.032 | 99.753  | 0.00 | 0.00 |
| ATOM | 25638 | 1HH2 | ARG | 1706 | 54.676 | 108.992 | 100.139 | 0.00 | 0.00 |
| ATOM | 25639 | 2HH2 | ARG | 1706 | 53.582 | 109.387 | 98.822  | 0.00 | 0.00 |
| ATOM | 25640 | C    | ARG | 1706 | 48.273 | 107.092 | 103.159 | 0.00 | 0.00 |
| ATOM | 25641 | O    | ARG | 1706 | 48.119 | 108.082 | 103.852 | 0.00 | 0.00 |
| ATOM | 25642 | N    | LEU | 1707 | 49.104 | 106.158 | 103.623 | 0.00 | 0.00 |
| ATOM | 25643 | H    | LEU | 1707 | 49.320 | 105.299 | 103.136 | 0.00 | 0.00 |
| ATOM | 25644 | CA   | LEU | 1707 | 49.753 | 106.294 | 105.008 | 0.00 | 0.00 |
| ATOM | 25645 | HA   | LEU | 1707 | 49.015 | 106.754 | 105.665 | 0.00 | 0.00 |
| ATOM | 25646 | CB   | LEU | 1707 | 50.019 | 104.856 | 105.603 | 0.00 | 0.00 |
| ATOM | 25647 | HB2  | LEU | 1707 | 50.609 | 104.257 | 104.910 | 0.00 | 0.00 |
| ATOM | 25648 | HB3  | LEU | 1707 | 50.643 | 105.057 | 106.473 | 0.00 | 0.00 |
| ATOM | 25649 | CG   | LEU | 1707 | 48.793 | 104.140 | 106.138 | 0.00 | 0.00 |
| ATOM | 25650 | HG   | LEU | 1707 | 48.148 | 104.691 | 106.823 | 0.00 | 0.00 |
| ATOM | 25651 | CD1  | LEU | 1707 | 47.948 | 103.638 | 104.958 | 0.00 | 0.00 |
| ATOM | 25652 | 1HD1 | LEU | 1707 | 47.385 | 104.486 | 104.568 | 0.00 | 0.00 |
| ATOM | 25653 | 2HD1 | LEU | 1707 | 48.538 | 103.078 | 104.232 | 0.00 | 0.00 |
| ATOM | 25654 | 3HD1 | LEU | 1707 | 47.169 | 102.946 | 105.279 | 0.00 | 0.00 |
| ATOM | 25655 | CD2  | LEU | 1707 | 49.268 | 102.854 | 106.874 | 0.00 | 0.00 |

|      |       |      |     |      |        |         |         |      |      |
|------|-------|------|-----|------|--------|---------|---------|------|------|
| ATOM | 25656 | 1HD2 | LEU | 1707 | 49.660 | 102.127 | 106.163 | 0.00 | 0.00 |
| ATOM | 25657 | 2HD2 | LEU | 1707 | 50.091 | 103.068 | 107.555 | 0.00 | 0.00 |
| ATOM | 25658 | 3HD2 | LEU | 1707 | 48.472 | 102.336 | 107.410 | 0.00 | 0.00 |
| ATOM | 25659 | C    | LEU | 1707 | 50.963 | 107.219 | 104.978 | 0.00 | 0.00 |
| ATOM | 25660 | O    | LEU | 1707 | 51.672 | 107.266 | 103.964 | 0.00 | 0.00 |
| ATOM | 25661 | N    | ASN | 1708 | 51.287 | 107.787 | 106.159 | 0.00 | 0.00 |
| ATOM | 25662 | H    | ASN | 1708 | 50.692 | 107.542 | 106.938 | 0.00 | 0.00 |
| ATOM | 25663 | CA   | ASN | 1708 | 52.507 | 108.558 | 106.365 | 0.00 | 0.00 |
| ATOM | 25664 | HA   | ASN | 1708 | 52.990 | 108.841 | 105.429 | 0.00 | 0.00 |
| ATOM | 25665 | CB   | ASN | 1708 | 52.281 | 109.818 | 107.146 | 0.00 | 0.00 |
| ATOM | 25666 | HB2  | ASN | 1708 | 51.408 | 110.361 | 106.785 | 0.00 | 0.00 |
| ATOM | 25667 | HB3  | ASN | 1708 | 52.097 | 109.624 | 108.203 | 0.00 | 0.00 |
| ATOM | 25668 | CG   | ASN | 1708 | 53.567 | 110.727 | 106.890 | 0.00 | 0.00 |
| ATOM | 25669 | OD1  | ASN | 1708 | 54.162 | 110.622 | 105.847 | 0.00 | 0.00 |
| ATOM | 25670 | ND2  | ASN | 1708 | 53.899 | 111.656 | 107.714 | 0.00 | 0.00 |
| ATOM | 25671 | 1HD2 | ASN | 1708 | 54.741 | 112.210 | 107.639 | 0.00 | 0.00 |
| ATOM | 25672 | 2HD2 | ASN | 1708 | 53.327 | 111.793 | 108.535 | 0.00 | 0.00 |
| ATOM | 25673 | C    | ASN | 1708 | 53.597 | 107.679 | 107.147 | 0.00 | 0.00 |
| ATOM | 25674 | O    | ASN | 1708 | 53.585 | 107.549 | 108.360 | 0.00 | 0.00 |
| ATOM | 25675 | N    | ILE | 1709 | 54.367 | 106.854 | 106.410 | 0.00 | 0.00 |
| ATOM | 25676 | H    | ILE | 1709 | 54.121 | 106.705 | 105.441 | 0.00 | 0.00 |
| ATOM | 25677 | CA   | ILE | 1709 | 55.406 | 105.921 | 106.800 | 0.00 | 0.00 |
| ATOM | 25678 | HA   | ILE | 1709 | 55.842 | 106.321 | 107.716 | 0.00 | 0.00 |
| ATOM | 25679 | CB   | ILE | 1709 | 54.839 | 104.493 | 107.259 | 0.00 | 0.00 |
| ATOM | 25680 | HB   | ILE | 1709 | 55.644 | 103.762 | 107.336 | 0.00 | 0.00 |
| ATOM | 25681 | CG2  | ILE | 1709 | 54.192 | 104.525 | 108.639 | 0.00 | 0.00 |

|      |       |      |     |      |        |         |         |      |      |
|------|-------|------|-----|------|--------|---------|---------|------|------|
| ATOM | 25682 | 1HG2 | ILE | 1709 | 54.842 | 105.156 | 109.245 | 0.00 | 0.00 |
| ATOM | 25683 | 2HG2 | ILE | 1709 | 53.200 | 104.975 | 108.663 | 0.00 | 0.00 |
| ATOM | 25684 | 3HG2 | ILE | 1709 | 54.182 | 103.562 | 109.149 | 0.00 | 0.00 |
| ATOM | 25685 | CG1  | ILE | 1709 | 53.937 | 103.905 | 106.193 | 0.00 | 0.00 |
| ATOM | 25686 | 2HG1 | ILE | 1709 | 53.041 | 104.520 | 106.107 | 0.00 | 0.00 |
| ATOM | 25687 | 3HG1 | ILE | 1709 | 54.442 | 103.993 | 105.231 | 0.00 | 0.00 |
| ATOM | 25688 | CD1  | ILE | 1709 | 53.412 | 102.453 | 106.367 | 0.00 | 0.00 |
| ATOM | 25689 | 1HD1 | ILE | 1709 | 52.747 | 102.291 | 105.519 | 0.00 | 0.00 |
| ATOM | 25690 | 2HD1 | ILE | 1709 | 54.172 | 101.675 | 106.292 | 0.00 | 0.00 |
| ATOM | 25691 | 3HD1 | ILE | 1709 | 53.015 | 102.344 | 107.376 | 0.00 | 0.00 |
| ATOM | 25692 | C    | ILE | 1709 | 56.408 | 105.883 | 105.571 | 0.00 | 0.00 |
| ATOM | 25693 | O    | ILE | 1709 | 55.978 | 106.345 | 104.533 | 0.00 | 0.00 |
| ATOM | 25694 | N    | PRO | 1710 | 57.625 | 105.344 | 105.632 | 0.00 | 0.00 |
| ATOM | 25695 | CD   | PRO | 1710 | 58.154 | 104.591 | 106.752 | 0.00 | 0.00 |
| ATOM | 25696 | HD2  | PRO | 1710 | 58.026 | 105.198 | 107.648 | 0.00 | 0.00 |
| ATOM | 25697 | HD3  | PRO | 1710 | 57.859 | 103.548 | 106.870 | 0.00 | 0.00 |
| ATOM | 25698 | CG   | PRO | 1710 | 59.608 | 104.538 | 106.436 | 0.00 | 0.00 |
| ATOM | 25699 | HG2  | PRO | 1710 | 60.093 | 105.429 | 106.836 | 0.00 | 0.00 |
| ATOM | 25700 | HG3  | PRO | 1710 | 59.904 | 103.633 | 106.967 | 0.00 | 0.00 |
| ATOM | 25701 | CB   | PRO | 1710 | 59.720 | 104.528 | 104.896 | 0.00 | 0.00 |
| ATOM | 25702 | HB2  | PRO | 1710 | 60.616 | 105.095 | 104.643 | 0.00 | 0.00 |
| ATOM | 25703 | HB3  | PRO | 1710 | 59.905 | 103.527 | 104.507 | 0.00 | 0.00 |
| ATOM | 25704 | CA   | PRO | 1710 | 58.390 | 105.172 | 104.417 | 0.00 | 0.00 |
| ATOM | 25705 | HA   | PRO | 1710 | 58.632 | 106.133 | 103.965 | 0.00 | 0.00 |
| ATOM | 25706 | C    | PRO | 1710 | 57.743 | 104.293 | 103.362 | 0.00 | 0.00 |
| ATOM | 25707 | O    | PRO | 1710 | 57.076 | 103.310 | 103.648 | 0.00 | 0.00 |



|      |       |      |     |      |        |         |         |      |      |
|------|-------|------|-----|------|--------|---------|---------|------|------|
| ATOM | 25708 | N    | ALA | 1711 | 58.110 | 104.582 | 102.101 | 0.00 | 0.00 |
| ATOM | 25709 | H    | ALA | 1711 | 58.769 | 105.342 | 102.006 | 0.00 | 0.00 |
| ATOM | 25710 | CA   | ALA | 1711 | 57.579 | 104.039 | 100.854 | 0.00 | 0.00 |
| ATOM | 25711 | HA   | ALA | 1711 | 56.497 | 104.083 | 100.979 | 0.00 | 0.00 |
| ATOM | 25712 | CB   | ALA | 1711 | 58.050 | 104.866 | 99.703  | 0.00 | 0.00 |
| ATOM | 25713 | HB1  | ALA | 1711 | 59.138 | 104.930 | 99.701  | 0.00 | 0.00 |
| ATOM | 25714 | HB2  | ALA | 1711 | 57.751 | 104.277 | 98.836  | 0.00 | 0.00 |
| ATOM | 25715 | HB3  | ALA | 1711 | 57.600 | 105.859 | 99.705  | 0.00 | 0.00 |
| ATOM | 25716 | C    | ALA | 1711 | 57.887 | 102.541 | 100.775 | 0.00 | 0.00 |
| ATOM | 25717 | O    | ALA | 1711 | 59.018 | 102.109 | 100.712 | 0.00 | 0.00 |
| ATOM | 25718 | N    | GLY | 1712 | 56.841 | 101.693 | 100.643 | 0.00 | 0.00 |
| ATOM | 25719 | H    | GLY | 1712 | 55.936 | 102.135 | 100.720 | 0.00 | 0.00 |
| ATOM | 25720 | CA   | GLY | 1712 | 56.921 | 100.295 | 100.616 | 0.00 | 0.00 |
| ATOM | 25721 | HA2  | GLY | 1712 | 56.034 | 100.014 | 100.048 | 0.00 | 0.00 |
| ATOM | 25722 | HA3  | GLY | 1712 | 57.813 | 99.914  | 100.120 | 0.00 | 0.00 |
| ATOM | 25723 | C    | GLY | 1712 | 56.839 | 99.674  | 101.999 | 0.00 | 0.00 |
| ATOM | 25724 | O    | GLY | 1712 | 56.749 | 98.454  | 102.109 | 0.00 | 0.00 |
| ATOM | 25725 | N    | THR | 1713 | 56.767 | 100.449 | 103.078 | 0.00 | 0.00 |
| ATOM | 25726 | H    | THR | 1713 | 56.827 | 101.452 | 102.970 | 0.00 | 0.00 |
| ATOM | 25727 | CA   | THR | 1713 | 56.512 | 99.830  | 104.399 | 0.00 | 0.00 |
| ATOM | 25728 | HA   | THR | 1713 | 56.943 | 98.834  | 104.502 | 0.00 | 0.00 |
| ATOM | 25729 | CB   | THR | 1713 | 57.216 | 100.511 | 105.543 | 0.00 | 0.00 |
| ATOM | 25730 | HB   | THR | 1713 | 57.191 | 99.842  | 106.403 | 0.00 | 0.00 |
| ATOM | 25731 | CG2  | THR | 1713 | 58.716 | 100.774 | 105.189 | 0.00 | 0.00 |
| ATOM | 25732 | 1HG2 | THR | 1713 | 59.177 | 99.792  | 105.083 | 0.00 | 0.00 |
| ATOM | 25733 | 2HG2 | THR | 1713 | 58.894 | 101.466 | 104.365 | 0.00 | 0.00 |

|      |       |      |     |      |        |         |         |      |      |
|------|-------|------|-----|------|--------|---------|---------|------|------|
| ATOM | 25734 | 3HG2 | THR | 1713 | 59.084 | 101.273 | 106.085 | 0.00 | 0.00 |
| ATOM | 25735 | OG1  | THR | 1713 | 56.726 | 101.746 | 105.808 | 0.00 | 0.00 |
| ATOM | 25736 | HG1  | THR | 1713 | 56.823 | 102.273 | 105.011 | 0.00 | 0.00 |
| ATOM | 25737 | C    | THR | 1713 | 55.020 | 99.643  | 104.797 | 0.00 | 0.00 |
| ATOM | 25738 | O    | THR | 1713 | 54.202 | 99.910  | 103.950 | 0.00 | 0.00 |
| ATOM | 25739 | N    | ALA | 1714 | 54.687 | 99.050  | 105.942 | 0.00 | 0.00 |
| ATOM | 25740 | H    | ALA | 1714 | 55.349 | 98.776  | 106.654 | 0.00 | 0.00 |
| ATOM | 25741 | CA   | ALA | 1714 | 53.337 | 98.691  | 106.300 | 0.00 | 0.00 |
| ATOM | 25742 | HA   | ALA | 1714 | 52.644 | 99.439  | 105.914 | 0.00 | 0.00 |
| ATOM | 25743 | CB   | ALA | 1714 | 53.045 | 97.369  | 105.650 | 0.00 | 0.00 |
| ATOM | 25744 | HB1  | ALA | 1714 | 53.550 | 96.570  | 106.193 | 0.00 | 0.00 |
| ATOM | 25745 | HB2  | ALA | 1714 | 52.002 | 97.089  | 105.798 | 0.00 | 0.00 |
| ATOM | 25746 | HB3  | ALA | 1714 | 53.275 | 97.385  | 104.585 | 0.00 | 0.00 |
| ATOM | 25747 | C    | ALA | 1714 | 52.994 | 98.622  | 107.774 | 0.00 | 0.00 |
| ATOM | 25748 | O    | ALA | 1714 | 53.847 | 98.753  | 108.683 | 0.00 | 0.00 |
| ATOM | 25749 | N    | VAL | 1715 | 51.628 | 98.334  | 107.958 | 0.00 | 0.00 |
| ATOM | 25750 | H    | VAL | 1715 | 51.003 | 98.106  | 107.197 | 0.00 | 0.00 |
| ATOM | 25751 | CA   | VAL | 1715 | 51.047 | 98.496  | 109.328 | 0.00 | 0.00 |
| ATOM | 25752 | HA   | VAL | 1715 | 51.817 | 98.320  | 110.078 | 0.00 | 0.00 |
| ATOM | 25753 | CB   | VAL | 1715 | 50.346 | 99.855  | 109.534 | 0.00 | 0.00 |
| ATOM | 25754 | HB   | VAL | 1715 | 49.736 | 100.124 | 108.671 | 0.00 | 0.00 |
| ATOM | 25755 | CG1  | VAL | 1715 | 49.674 | 99.804  | 110.897 | 0.00 | 0.00 |
| ATOM | 25756 | 1HG1 | VAL | 1715 | 48.783 | 99.176  | 110.883 | 0.00 | 0.00 |
| ATOM | 25757 | 2HG1 | VAL | 1715 | 50.336 | 99.562  | 111.728 | 0.00 | 0.00 |
| ATOM | 25758 | 3HG1 | VAL | 1715 | 49.346 | 100.833 | 111.051 | 0.00 | 0.00 |
| ATOM | 25759 | CG2  | VAL | 1715 | 51.327 | 100.955 | 109.590 | 0.00 | 0.00 |

|      |       |      |     |      |        |         |         |      |      |
|------|-------|------|-----|------|--------|---------|---------|------|------|
| ATOM | 25760 | 1HG2 | VAL | 1715 | 52.164 | 100.830 | 110.277 | 0.00 | 0.00 |
| ATOM | 25761 | 2HG2 | VAL | 1715 | 51.758 | 101.013 | 108.591 | 0.00 | 0.00 |
| ATOM | 25762 | 3HG2 | VAL | 1715 | 50.856 | 101.927 | 109.731 | 0.00 | 0.00 |
| ATOM | 25763 | C    | VAL | 1715 | 50.107 | 97.322  | 109.527 | 0.00 | 0.00 |
| ATOM | 25764 | O    | VAL | 1715 | 49.006 | 97.290  | 109.005 | 0.00 | 0.00 |
| ATOM | 25765 | N    | ARG | 1716 | 50.598 | 96.294  | 110.200 | 0.00 | 0.00 |
| ATOM | 25766 | H    | ARG | 1716 | 51.504 | 96.520  | 110.586 | 0.00 | 0.00 |
| ATOM | 25767 | CA   | ARG | 1716 | 49.714 | 95.130  | 110.614 | 0.00 | 0.00 |
| ATOM | 25768 | HA   | ARG | 1716 | 49.272 | 94.787  | 109.679 | 0.00 | 0.00 |
| ATOM | 25769 | CB   | ARG | 1716 | 50.631 | 94.021  | 111.156 | 0.00 | 0.00 |
| ATOM | 25770 | HB2  | ARG | 1716 | 51.615 | 94.014  | 110.687 | 0.00 | 0.00 |
| ATOM | 25771 | HB3  | ARG | 1716 | 50.835 | 94.194  | 112.213 | 0.00 | 0.00 |
| ATOM | 25772 | CG   | ARG | 1716 | 49.978 | 92.654  | 111.051 | 0.00 | 0.00 |
| ATOM | 25773 | HG2  | ARG | 1716 | 49.227 | 92.637  | 111.841 | 0.00 | 0.00 |
| ATOM | 25774 | HG3  | ARG | 1716 | 49.482 | 92.485  | 110.095 | 0.00 | 0.00 |
| ATOM | 25775 | CD   | ARG | 1716 | 50.868 | 91.457  | 111.226 | 0.00 | 0.00 |
| ATOM | 25776 | HD2  | ARG | 1716 | 51.738 | 91.679  | 110.609 | 0.00 | 0.00 |
| ATOM | 25777 | HD3  | ARG | 1716 | 51.216 | 91.396  | 112.257 | 0.00 | 0.00 |
| ATOM | 25778 | NE   | ARG | 1716 | 50.213 | 90.166  | 110.889 | 0.00 | 0.00 |
| ATOM | 25779 | HE   | ARG | 1716 | 49.531 | 89.770  | 111.521 | 0.00 | 0.00 |
| ATOM | 25780 | CZ   | ARG | 1716 | 50.216 | 89.597  | 109.715 | 0.00 | 0.00 |
| ATOM | 25781 | NH1  | ARG | 1716 | 50.868 | 90.146  | 108.753 | 0.00 | 0.00 |
| ATOM | 25782 | 1HH1 | ARG | 1716 | 50.513 | 89.753  | 107.893 | 0.00 | 0.00 |
| ATOM | 25783 | 2HH1 | ARG | 1716 | 51.095 | 91.128  | 108.820 | 0.00 | 0.00 |
| ATOM | 25784 | NH2  | ARG | 1716 | 49.585 | 88.477  | 109.523 | 0.00 | 0.00 |
| ATOM | 25785 | 1HH2 | ARG | 1716 | 49.587 | 88.008  | 108.629 | 0.00 | 0.00 |

|      |       |      |     |      |        |         |         |      |      |
|------|-------|------|-----|------|--------|---------|---------|------|------|
| ATOM | 25786 | 2HH2 | ARG | 1716 | 49.348 | 87.916  | 110.328 | 0.00 | 0.00 |
| ATOM | 25787 | C    | ARG | 1716 | 48.665 | 95.579  | 111.598 | 0.00 | 0.00 |
| ATOM | 25788 | O    | ARG | 1716 | 49.002 | 96.125  | 112.684 | 0.00 | 0.00 |
| ATOM | 25789 | N    | PHE | 1717 | 47.455 | 95.197  | 111.371 | 0.00 | 0.00 |
| ATOM | 25790 | H    | PHE | 1717 | 47.333 | 94.682  | 110.511 | 0.00 | 0.00 |
| ATOM | 25791 | CA   | PHE | 1717 | 46.176 | 95.379  | 112.209 | 0.00 | 0.00 |
| ATOM | 25792 | HA   | PHE | 1717 | 46.263 | 96.087  | 113.033 | 0.00 | 0.00 |
| ATOM | 25793 | CB   | PHE | 1717 | 45.074 | 95.898  | 111.302 | 0.00 | 0.00 |
| ATOM | 25794 | HB2  | PHE | 1717 | 45.230 | 95.348  | 110.374 | 0.00 | 0.00 |
| ATOM | 25795 | HB3  | PHE | 1717 | 44.095 | 95.665  | 111.719 | 0.00 | 0.00 |
| ATOM | 25796 | CG   | PHE | 1717 | 45.255 | 97.396  | 110.963 | 0.00 | 0.00 |
| ATOM | 25797 | CD1  | PHE | 1717 | 44.676 | 98.397  | 111.836 | 0.00 | 0.00 |
| ATOM | 25798 | HD1  | PHE | 1717 | 43.977 | 98.163  | 112.626 | 0.00 | 0.00 |
| ATOM | 25799 | CE1  | PHE | 1717 | 44.917 | 99.778  | 111.495 | 0.00 | 0.00 |
| ATOM | 25800 | HE1  | PHE | 1717 | 44.674 | 100.565 | 112.194 | 0.00 | 0.00 |
| ATOM | 25801 | CZ   | PHE | 1717 | 45.755 | 100.123 | 110.421 | 0.00 | 0.00 |
| ATOM | 25802 | HZ   | PHE | 1717 | 45.905 | 101.179 | 110.252 | 0.00 | 0.00 |
| ATOM | 25803 | CE2  | PHE | 1717 | 46.161 | 99.068  | 109.528 | 0.00 | 0.00 |
| ATOM | 25804 | HE2  | PHE | 1717 | 46.791 | 99.226  | 108.664 | 0.00 | 0.00 |
| ATOM | 25805 | CD2  | PHE | 1717 | 45.947 | 97.723  | 109.824 | 0.00 | 0.00 |
| ATOM | 25806 | HD2  | PHE | 1717 | 46.401 | 97.091  | 109.076 | 0.00 | 0.00 |
| ATOM | 25807 | C    | PHE | 1717 | 45.748 | 93.989  | 112.815 | 0.00 | 0.00 |
| ATOM | 25808 | O    | PHE | 1717 | 45.054 | 93.283  | 112.138 | 0.00 | 0.00 |
| ATOM | 25809 | N    | GLU | 1718 | 46.191 | 93.653  | 114.038 | 0.00 | 0.00 |
| ATOM | 25810 | H    | GLU | 1718 | 46.665 | 94.314  | 114.637 | 0.00 | 0.00 |
| ATOM | 25811 | CA   | GLU | 1718 | 45.880 | 92.369  | 114.617 | 0.00 | 0.00 |

|      |       |     |     |      |        |        |         |      |      |
|------|-------|-----|-----|------|--------|--------|---------|------|------|
| ATOM | 25812 | HA  | GLU | 1718 | 45.912 | 91.545 | 113.904 | 0.00 | 0.00 |
| ATOM | 25813 | CB  | GLU | 1718 | 46.995 | 92.099 | 115.690 | 0.00 | 0.00 |
| ATOM | 25814 | HB2 | GLU | 1718 | 47.178 | 92.964 | 116.327 | 0.00 | 0.00 |
| ATOM | 25815 | HB3 | GLU | 1718 | 46.635 | 91.320 | 116.362 | 0.00 | 0.00 |
| ATOM | 25816 | CG  | GLU | 1718 | 48.286 | 91.635 | 115.005 | 0.00 | 0.00 |
| ATOM | 25817 | HG2 | GLU | 1718 | 48.799 | 92.452 | 114.496 | 0.00 | 0.00 |
| ATOM | 25818 | HG3 | GLU | 1718 | 48.959 | 91.347 | 115.812 | 0.00 | 0.00 |
| ATOM | 25819 | CD  | GLU | 1718 | 48.118 | 90.422 | 114.075 | 0.00 | 0.00 |
| ATOM | 25820 | OE1 | GLU | 1718 | 47.300 | 89.521 | 114.415 | 0.00 | 0.00 |
| ATOM | 25821 | OE2 | GLU | 1718 | 48.890 | 90.206 | 113.148 | 0.00 | 0.00 |
| ATOM | 25822 | C   | GLU | 1718 | 44.498 | 92.448 | 115.362 | 0.00 | 0.00 |
| ATOM | 25823 | O   | GLU | 1718 | 44.122 | 93.538 | 115.801 | 0.00 | 0.00 |
| ATOM | 25824 | N   | PRO | 1719 | 43.780 | 91.299 | 115.460 | 0.00 | 0.00 |
| ATOM | 25825 | CD  | PRO | 1719 | 44.186 | 89.917 | 115.252 | 0.00 | 0.00 |
| ATOM | 25826 | HD2 | PRO | 1719 | 44.207 | 89.714 | 114.182 | 0.00 | 0.00 |
| ATOM | 25827 | HD3 | PRO | 1719 | 45.182 | 89.710 | 115.643 | 0.00 | 0.00 |
| ATOM | 25828 | CG  | PRO | 1719 | 43.181 | 88.961 | 116.024 | 0.00 | 0.00 |
| ATOM | 25829 | HG2 | PRO | 1719 | 43.117 | 87.962 | 115.592 | 0.00 | 0.00 |
| ATOM | 25830 | HG3 | PRO | 1719 | 43.470 | 89.027 | 117.072 | 0.00 | 0.00 |
| ATOM | 25831 | CB  | PRO | 1719 | 41.964 | 89.733 | 115.724 | 0.00 | 0.00 |
| ATOM | 25832 | HB2 | PRO | 1719 | 41.734 | 89.613 | 114.665 | 0.00 | 0.00 |
| ATOM | 25833 | HB3 | PRO | 1719 | 41.128 | 89.441 | 116.360 | 0.00 | 0.00 |
| ATOM | 25834 | CA  | PRO | 1719 | 42.366 | 91.224 | 115.797 | 0.00 | 0.00 |
| ATOM | 25835 | HA  | PRO | 1719 | 41.906 | 91.849 | 115.031 | 0.00 | 0.00 |
| ATOM | 25836 | C   | PRO | 1719 | 42.091 | 91.840 | 117.158 | 0.00 | 0.00 |
| ATOM | 25837 | O   | PRO | 1719 | 42.750 | 91.541 | 118.154 | 0.00 | 0.00 |

|      |       |      |     |      |        |        |         |      |      |
|------|-------|------|-----|------|--------|--------|---------|------|------|
| ATOM | 25838 | N    | GLY | 1720 | 41.162 | 92.819 | 117.229 | 0.00 | 0.00 |
| ATOM | 25839 | H    | GLY | 1720 | 40.670 | 93.118 | 116.398 | 0.00 | 0.00 |
| ATOM | 25840 | CA   | GLY | 1720 | 40.898 | 93.693 | 118.419 | 0.00 | 0.00 |
| ATOM | 25841 | HA2  | GLY | 1720 | 39.901 | 94.134 | 118.434 | 0.00 | 0.00 |
| ATOM | 25842 | HA3  | GLY | 1720 | 41.045 | 93.125 | 119.337 | 0.00 | 0.00 |
| ATOM | 25843 | C    | GLY | 1720 | 41.830 | 94.861 | 118.589 | 0.00 | 0.00 |
| ATOM | 25844 | O    | GLY | 1720 | 41.626 | 95.693 | 119.515 | 0.00 | 0.00 |
| ATOM | 25845 | N    | GLN | 1721 | 42.936 | 94.908 | 117.907 | 0.00 | 0.00 |
| ATOM | 25846 | H    | GLN | 1721 | 43.206 | 94.272 | 117.171 | 0.00 | 0.00 |
| ATOM | 25847 | CA   | GLN | 1721 | 43.934 | 95.941 | 118.081 | 0.00 | 0.00 |
| ATOM | 25848 | HA   | GLN | 1721 | 44.242 | 95.991 | 119.126 | 0.00 | 0.00 |
| ATOM | 25849 | CB   | GLN | 1721 | 45.175 | 95.758 | 117.158 | 0.00 | 0.00 |
| ATOM | 25850 | HB2  | GLN | 1721 | 45.664 | 94.801 | 117.343 | 0.00 | 0.00 |
| ATOM | 25851 | HB3  | GLN | 1721 | 44.881 | 95.884 | 116.116 | 0.00 | 0.00 |
| ATOM | 25852 | CG   | GLN | 1721 | 46.138 | 96.831 | 117.283 | 0.00 | 0.00 |
| ATOM | 25853 | HG2  | GLN | 1721 | 45.635 | 97.726 | 116.916 | 0.00 | 0.00 |
| ATOM | 25854 | HG3  | GLN | 1721 | 46.331 | 96.987 | 118.344 | 0.00 | 0.00 |
| ATOM | 25855 | CD   | GLN | 1721 | 47.395 | 96.528 | 116.540 | 0.00 | 0.00 |
| ATOM | 25856 | OE1  | GLN | 1721 | 47.509 | 96.011 | 115.467 | 0.00 | 0.00 |
| ATOM | 25857 | NE2  | GLN | 1721 | 48.516 | 96.747 | 117.113 | 0.00 | 0.00 |
| ATOM | 25858 | 1HE2 | GLN | 1721 | 49.386 | 96.476 | 116.678 | 0.00 | 0.00 |
| ATOM | 25859 | 2HE2 | GLN | 1721 | 48.547 | 97.185 | 118.022 | 0.00 | 0.00 |
| ATOM | 25860 | C    | GLN | 1721 | 43.190 | 97.301 | 117.783 | 0.00 | 0.00 |
| ATOM | 25861 | O    | GLN | 1721 | 42.779 | 97.567 | 116.639 | 0.00 | 0.00 |
| ATOM | 25862 | N    | LYS | 1722 | 43.198 | 98.233 | 118.763 | 0.00 | 0.00 |
| ATOM | 25863 | H    | LYS | 1722 | 43.382 | 97.953 | 119.716 | 0.00 | 0.00 |

|      |       |     |     |      |        |         |         |      |      |
|------|-------|-----|-----|------|--------|---------|---------|------|------|
| ATOM | 25864 | CA  | LYS | 1722 | 43.151 | 99.698  | 118.565 | 0.00 | 0.00 |
| ATOM | 25865 | HA  | LYS | 1722 | 42.334 | 99.962  | 117.893 | 0.00 | 0.00 |
| ATOM | 25866 | CB  | LYS | 1722 | 42.777 | 100.313 | 119.894 | 0.00 | 0.00 |
| ATOM | 25867 | HB2 | LYS | 1722 | 43.379 | 99.795  | 120.641 | 0.00 | 0.00 |
| ATOM | 25868 | HB3 | LYS | 1722 | 43.011 | 101.376 | 119.839 | 0.00 | 0.00 |
| ATOM | 25869 | CG  | LYS | 1722 | 41.221 | 100.113 | 120.130 | 0.00 | 0.00 |
| ATOM | 25870 | HG2 | LYS | 1722 | 40.652 | 100.649 | 119.370 | 0.00 | 0.00 |
| ATOM | 25871 | HG3 | LYS | 1722 | 41.021 | 99.045  | 120.040 | 0.00 | 0.00 |
| ATOM | 25872 | CD  | LYS | 1722 | 40.904 | 100.538 | 121.547 | 0.00 | 0.00 |
| ATOM | 25873 | HD2 | LYS | 1722 | 39.890 | 100.181 | 121.727 | 0.00 | 0.00 |
| ATOM | 25874 | HD3 | LYS | 1722 | 41.528 | 100.116 | 122.335 | 0.00 | 0.00 |
| ATOM | 25875 | CE  | LYS | 1722 | 41.058 | 102.018 | 121.868 | 0.00 | 0.00 |
| ATOM | 25876 | HE2 | LYS | 1722 | 42.142 | 102.133 | 121.857 | 0.00 | 0.00 |
| ATOM | 25877 | HE3 | LYS | 1722 | 40.641 | 102.674 | 121.104 | 0.00 | 0.00 |
| ATOM | 25878 | NZ  | LYS | 1722 | 40.493 | 102.488 | 123.102 | 0.00 | 0.00 |
| ATOM | 25879 | HZ1 | LYS | 1722 | 40.451 | 103.489 | 123.232 | 0.00 | 0.00 |
| ATOM | 25880 | HZ2 | LYS | 1722 | 39.527 | 102.194 | 123.145 | 0.00 | 0.00 |
| ATOM | 25881 | HZ3 | LYS | 1722 | 40.891 | 102.092 | 123.941 | 0.00 | 0.00 |
| ATOM | 25882 | C   | LYS | 1722 | 44.520 | 100.216 | 118.054 | 0.00 | 0.00 |
| ATOM | 25883 | O   | LYS | 1722 | 45.568 | 99.851  | 118.568 | 0.00 | 0.00 |
| ATOM | 25884 | N   | ARG | 1723 | 44.408 | 101.264 | 117.198 | 0.00 | 0.00 |
| ATOM | 25885 | H   | ARG | 1723 | 43.519 | 101.549 | 116.814 | 0.00 | 0.00 |
| ATOM | 25886 | CA  | ARG | 1723 | 45.510 | 102.081 | 116.763 | 0.00 | 0.00 |
| ATOM | 25887 | HA  | ARG | 1723 | 46.357 | 102.093 | 117.449 | 0.00 | 0.00 |
| ATOM | 25888 | CB  | ARG | 1723 | 46.127 | 101.543 | 115.478 | 0.00 | 0.00 |
| ATOM | 25889 | HB2 | ARG | 1723 | 45.269 | 101.209 | 114.895 | 0.00 | 0.00 |

|      |       |      |     |      |        |         |         |      |      |
|------|-------|------|-----|------|--------|---------|---------|------|------|
| ATOM | 25890 | HB3  | ARG | 1723 | 46.802 | 102.226 | 114.963 | 0.00 | 0.00 |
| ATOM | 25891 | CG   | ARG | 1723 | 47.068 | 100.407 | 115.711 | 0.00 | 0.00 |
| ATOM | 25892 | HG2  | ARG | 1723 | 47.900 | 100.673 | 116.363 | 0.00 | 0.00 |
| ATOM | 25893 | HG3  | ARG | 1723 | 46.581 | 99.571  | 116.213 | 0.00 | 0.00 |
| ATOM | 25894 | CD   | ARG | 1723 | 47.570 | 99.945  | 114.337 | 0.00 | 0.00 |
| ATOM | 25895 | HD2  | ARG | 1723 | 46.653 | 99.644  | 113.830 | 0.00 | 0.00 |
| ATOM | 25896 | HD3  | ARG | 1723 | 47.912 | 100.778 | 113.724 | 0.00 | 0.00 |
| ATOM | 25897 | NE   | ARG | 1723 | 48.463 | 98.825  | 114.475 | 0.00 | 0.00 |
| ATOM | 25898 | HE   | ARG | 1723 | 48.169 | 97.968  | 114.029 | 0.00 | 0.00 |
| ATOM | 25899 | CZ   | ARG | 1723 | 49.707 | 98.763  | 114.909 | 0.00 | 0.00 |
| ATOM | 25900 | NH1  | ARG | 1723 | 50.355 | 97.669  | 114.770 | 0.00 | 0.00 |
| ATOM | 25901 | 1HH1 | ARG | 1723 | 51.242 | 97.554  | 115.238 | 0.00 | 0.00 |
| ATOM | 25902 | 2HH1 | ARG | 1723 | 49.954 | 96.821  | 114.397 | 0.00 | 0.00 |
| ATOM | 25903 | NH2  | ARG | 1723 | 50.403 | 99.730  | 115.456 | 0.00 | 0.00 |
| ATOM | 25904 | 1HH2 | ARG | 1723 | 51.392 | 99.532  | 115.402 | 0.00 | 0.00 |
| ATOM | 25905 | 2HH2 | ARG | 1723 | 49.983 | 100.628 | 115.646 | 0.00 | 0.00 |
| ATOM | 25906 | C    | ARG | 1723 | 45.214 | 103.562 | 116.641 | 0.00 | 0.00 |
| ATOM | 25907 | O    | ARG | 1723 | 44.045 | 103.943 | 116.392 | 0.00 | 0.00 |
| ATOM | 25908 | N    | GLU | 1724 | 46.257 | 104.386 | 116.715 | 0.00 | 0.00 |
| ATOM | 25909 | H    | GLU | 1724 | 47.141 | 104.048 | 117.068 | 0.00 | 0.00 |
| ATOM | 25910 | CA   | GLU | 1724 | 46.333 | 105.672 | 115.955 | 0.00 | 0.00 |
| ATOM | 25911 | HA   | GLU | 1724 | 45.353 | 105.878 | 115.524 | 0.00 | 0.00 |
| ATOM | 25912 | CB   | GLU | 1724 | 46.650 | 106.888 | 116.853 | 0.00 | 0.00 |
| ATOM | 25913 | HB2  | GLU | 1724 | 45.987 | 106.751 | 117.707 | 0.00 | 0.00 |
| ATOM | 25914 | HB3  | GLU | 1724 | 47.685 | 106.758 | 117.168 | 0.00 | 0.00 |
| ATOM | 25915 | CG   | GLU | 1724 | 46.325 | 108.220 | 116.107 | 0.00 | 0.00 |



|      |       |      |     |      |        |         |         |      |      |
|------|-------|------|-----|------|--------|---------|---------|------|------|
| ATOM | 25916 | HG2  | GLU | 1724 | 46.895 | 108.425 | 115.200 | 0.00 | 0.00 |
| ATOM | 25917 | HG3  | GLU | 1724 | 45.292 | 108.122 | 115.775 | 0.00 | 0.00 |
| ATOM | 25918 | CD   | GLU | 1724 | 46.291 | 109.392 | 117.005 | 0.00 | 0.00 |
| ATOM | 25919 | OE1  | GLU | 1724 | 47.392 | 109.893 | 117.355 | 0.00 | 0.00 |
| ATOM | 25920 | OE2  | GLU | 1724 | 45.197 | 109.799 | 117.391 | 0.00 | 0.00 |
| ATOM | 25921 | C    | GLU | 1724 | 47.330 | 105.509 | 114.812 | 0.00 | 0.00 |
| ATOM | 25922 | O    | GLU | 1724 | 48.385 | 104.926 | 114.969 | 0.00 | 0.00 |
| ATOM | 25923 | N    | VAL | 1725 | 46.885 | 105.915 | 113.612 | 0.00 | 0.00 |
| ATOM | 25924 | H    | VAL | 1725 | 45.886 | 106.016 | 113.498 | 0.00 | 0.00 |
| ATOM | 25925 | CA   | VAL | 1725 | 47.767 | 105.959 | 112.394 | 0.00 | 0.00 |
| ATOM | 25926 | HA   | VAL | 1725 | 48.771 | 105.709 | 112.735 | 0.00 | 0.00 |
| ATOM | 25927 | CB   | VAL | 1725 | 47.248 | 104.911 | 111.369 | 0.00 | 0.00 |
| ATOM | 25928 | HB   | VAL | 1725 | 46.329 | 105.262 | 110.899 | 0.00 | 0.00 |
| ATOM | 25929 | CG1  | VAL | 1725 | 48.219 | 104.744 | 110.154 | 0.00 | 0.00 |
| ATOM | 25930 | 1HG1 | VAL | 1725 | 47.791 | 104.003 | 109.479 | 0.00 | 0.00 |
| ATOM | 25931 | 2HG1 | VAL | 1725 | 48.315 | 105.703 | 109.643 | 0.00 | 0.00 |
| ATOM | 25932 | 3HG1 | VAL | 1725 | 49.166 | 104.336 | 110.508 | 0.00 | 0.00 |
| ATOM | 25933 | CG2  | VAL | 1725 | 46.945 | 103.545 | 111.887 | 0.00 | 0.00 |
| ATOM | 25934 | 1HG2 | VAL | 1725 | 45.969 | 103.430 | 112.357 | 0.00 | 0.00 |
| ATOM | 25935 | 2HG2 | VAL | 1725 | 46.956 | 102.906 | 111.003 | 0.00 | 0.00 |
| ATOM | 25936 | 3HG2 | VAL | 1725 | 47.699 | 103.205 | 112.598 | 0.00 | 0.00 |
| ATOM | 25937 | C    | VAL | 1725 | 47.803 | 107.394 | 111.746 | 0.00 | 0.00 |
| ATOM | 25938 | O    | VAL | 1725 | 46.844 | 108.172 | 111.817 | 0.00 | 0.00 |
| ATOM | 25939 | N    | GLU | 1726 | 48.951 | 107.831 | 111.262 | 0.00 | 0.00 |
| ATOM | 25940 | H    | GLU | 1726 | 49.793 | 107.274 | 111.308 | 0.00 | 0.00 |
| ATOM | 25941 | CA   | GLU | 1726 | 49.185 | 109.097 | 110.655 | 0.00 | 0.00 |

|      |       |      |     |      |        |         |         |      |      |
|------|-------|------|-----|------|--------|---------|---------|------|------|
| ATOM | 25942 | HA   | GLU | 1726 | 48.408 | 109.801 | 110.950 | 0.00 | 0.00 |
| ATOM | 25943 | CB   | GLU | 1726 | 50.487 | 109.777 | 111.152 | 0.00 | 0.00 |
| ATOM | 25944 | HB2  | GLU | 1726 | 50.354 | 109.923 | 112.224 | 0.00 | 0.00 |
| ATOM | 25945 | HB3  | GLU | 1726 | 51.357 | 109.120 | 111.170 | 0.00 | 0.00 |
| ATOM | 25946 | CG   | GLU | 1726 | 50.934 | 111.134 | 110.493 | 0.00 | 0.00 |
| ATOM | 25947 | HG2  | GLU | 1726 | 51.006 | 110.893 | 109.432 | 0.00 | 0.00 |
| ATOM | 25948 | HG3  | GLU | 1726 | 50.178 | 111.895 | 110.686 | 0.00 | 0.00 |
| ATOM | 25949 | CD   | GLU | 1726 | 52.245 | 111.675 | 111.161 | 0.00 | 0.00 |
| ATOM | 25950 | OE1  | GLU | 1726 | 52.165 | 111.973 | 112.398 | 0.00 | 0.00 |
| ATOM | 25951 | OE2  | GLU | 1726 | 53.279 | 111.904 | 110.455 | 0.00 | 0.00 |
| ATOM | 25952 | C    | GLU | 1726 | 49.131 | 108.922 | 109.072 | 0.00 | 0.00 |
| ATOM | 25953 | O    | GLU | 1726 | 49.517 | 107.888 | 108.572 | 0.00 | 0.00 |
| ATOM | 25954 | N    | LEU | 1727 | 48.618 | 109.871 | 108.340 | 0.00 | 0.00 |
| ATOM | 25955 | H    | LEU | 1727 | 48.303 | 110.762 | 108.695 | 0.00 | 0.00 |
| ATOM | 25956 | CA   | LEU | 1727 | 48.320 | 109.766 | 106.844 | 0.00 | 0.00 |
| ATOM | 25957 | HA   | LEU | 1727 | 48.662 | 108.883 | 106.304 | 0.00 | 0.00 |
| ATOM | 25958 | CB   | LEU | 1727 | 46.805 | 109.844 | 106.666 | 0.00 | 0.00 |
| ATOM | 25959 | HB2  | LEU | 1727 | 46.440 | 110.805 | 107.028 | 0.00 | 0.00 |
| ATOM | 25960 | HB3  | LEU | 1727 | 46.660 | 109.809 | 105.586 | 0.00 | 0.00 |
| ATOM | 25961 | CG   | LEU | 1727 | 46.021 | 108.692 | 107.364 | 0.00 | 0.00 |
| ATOM | 25962 | HG   | LEU | 1727 | 46.204 | 108.873 | 108.423 | 0.00 | 0.00 |
| ATOM | 25963 | CD1  | LEU | 1727 | 44.553 | 108.840 | 107.168 | 0.00 | 0.00 |
| ATOM | 25964 | 1HD1 | LEU | 1727 | 44.018 | 108.150 | 107.820 | 0.00 | 0.00 |
| ATOM | 25965 | 2HD1 | LEU | 1727 | 44.228 | 109.840 | 107.456 | 0.00 | 0.00 |
| ATOM | 25966 | 3HD1 | LEU | 1727 | 44.324 | 108.743 | 106.107 | 0.00 | 0.00 |
| ATOM | 25967 | CD2  | LEU | 1727 | 46.418 | 107.276 | 106.961 | 0.00 | 0.00 |

|      |       |      |     |      |        |         |         |      |      |
|------|-------|------|-----|------|--------|---------|---------|------|------|
| ATOM | 25968 | 1HD2 | LEU | 1727 | 47.461 | 107.148 | 107.251 | 0.00 | 0.00 |
| ATOM | 25969 | 2HD2 | LEU | 1727 | 45.703 | 106.594 | 107.420 | 0.00 | 0.00 |
| ATOM | 25970 | 3HD2 | LEU | 1727 | 46.340 | 107.109 | 105.886 | 0.00 | 0.00 |
| ATOM | 25971 | C    | LEU | 1727 | 48.862 | 110.994 | 106.086 | 0.00 | 0.00 |
| ATOM | 25972 | O    | LEU | 1727 | 48.909 | 112.103 | 106.594 | 0.00 | 0.00 |
| ATOM | 25973 | N    | VAL | 1728 | 49.203 | 110.889 | 104.792 | 0.00 | 0.00 |
| ATOM | 25974 | H    | VAL | 1728 | 48.986 | 110.035 | 104.299 | 0.00 | 0.00 |
| ATOM | 25975 | CA   | VAL | 1728 | 49.709 | 111.934 | 103.843 | 0.00 | 0.00 |
| ATOM | 25976 | HA   | VAL | 1728 | 49.544 | 112.942 | 104.224 | 0.00 | 0.00 |
| ATOM | 25977 | CB   | VAL | 1728 | 51.272 | 111.824 | 103.607 | 0.00 | 0.00 |
| ATOM | 25978 | HB   | VAL | 1728 | 51.677 | 111.878 | 104.618 | 0.00 | 0.00 |
| ATOM | 25979 | CG1  | VAL | 1728 | 51.663 | 110.510 | 103.075 | 0.00 | 0.00 |
| ATOM | 25980 | 1HG1 | VAL | 1728 | 51.344 | 109.735 | 103.772 | 0.00 | 0.00 |
| ATOM | 25981 | 2HG1 | VAL | 1728 | 51.282 | 110.402 | 102.059 | 0.00 | 0.00 |
| ATOM | 25982 | 3HG1 | VAL | 1728 | 52.752 | 110.486 | 103.119 | 0.00 | 0.00 |
| ATOM | 25983 | CG2  | VAL | 1728 | 51.748 | 112.960 | 102.654 | 0.00 | 0.00 |
| ATOM | 25984 | 1HG2 | VAL | 1728 | 52.807 | 112.841 | 102.427 | 0.00 | 0.00 |
| ATOM | 25985 | 2HG2 | VAL | 1728 | 51.167 | 113.028 | 101.734 | 0.00 | 0.00 |
| ATOM | 25986 | 3HG2 | VAL | 1728 | 51.571 | 113.845 | 103.265 | 0.00 | 0.00 |
| ATOM | 25987 | C    | VAL | 1728 | 48.940 | 111.842 | 102.503 | 0.00 | 0.00 |
| ATOM | 25988 | O    | VAL | 1728 | 48.694 | 110.796 | 101.920 | 0.00 | 0.00 |
| ATOM | 25989 | N    | ALA | 1729 | 48.591 | 112.973 | 101.915 | 0.00 | 0.00 |
| ATOM | 25990 | H    | ALA | 1729 | 48.679 | 113.770 | 102.530 | 0.00 | 0.00 |
| ATOM | 25991 | CA   | ALA | 1729 | 47.888 | 113.154 | 100.618 | 0.00 | 0.00 |
| ATOM | 25992 | HA   | ALA | 1729 | 47.141 | 112.361 | 100.642 | 0.00 | 0.00 |
| ATOM | 25993 | CB   | ALA | 1729 | 47.264 | 114.534 | 100.613 | 0.00 | 0.00 |

|      |       |     |     |      |        |         |         |      |      |
|------|-------|-----|-----|------|--------|---------|---------|------|------|
| ATOM | 25994 | HB1 | ALA | 1729 | 48.015 | 115.285 | 100.858 | 0.00 | 0.00 |
| ATOM | 25995 | HB2 | ALA | 1729 | 46.716 | 114.701 | 99.686  | 0.00 | 0.00 |
| ATOM | 25996 | HB3 | ALA | 1729 | 46.496 | 114.480 | 101.383 | 0.00 | 0.00 |
| ATOM | 25997 | C   | ALA | 1729 | 48.717 | 112.906 | 99.397  | 0.00 | 0.00 |
| ATOM | 25998 | O   | ALA | 1729 | 49.916 | 112.970 | 99.364  | 0.00 | 0.00 |
| ATOM | 25999 | N   | PHE | 1730 | 48.005 | 112.718 | 98.305  | 0.00 | 0.00 |
| ATOM | 26000 | H   | PHE | 1730 | 47.012 | 112.557 | 98.397  | 0.00 | 0.00 |
| ATOM | 26001 | CA  | PHE | 1730 | 48.534 | 112.562 | 96.908  | 0.00 | 0.00 |
| ATOM | 26002 | HA  | PHE | 1730 | 49.495 | 112.058 | 97.013  | 0.00 | 0.00 |
| ATOM | 26003 | CB  | PHE | 1730 | 47.489 | 111.645 | 96.299  | 0.00 | 0.00 |
| ATOM | 26004 | HB2 | PHE | 1730 | 46.487 | 112.040 | 96.468  | 0.00 | 0.00 |
| ATOM | 26005 | HB3 | PHE | 1730 | 47.687 | 111.778 | 95.235  | 0.00 | 0.00 |
| ATOM | 26006 | CG  | PHE | 1730 | 47.588 | 110.152 | 96.579  | 0.00 | 0.00 |
| ATOM | 26007 | CD1 | PHE | 1730 | 48.716 | 109.431 | 96.264  | 0.00 | 0.00 |
| ATOM | 26008 | HD1 | PHE | 1730 | 49.532 | 109.908 | 95.742  | 0.00 | 0.00 |
| ATOM | 26009 | CE1 | PHE | 1730 | 48.748 | 108.029 | 96.423  | 0.00 | 0.00 |
| ATOM | 26010 | HE1 | PHE | 1730 | 49.648 | 107.531 | 96.092  | 0.00 | 0.00 |
| ATOM | 26011 | CZ  | PHE | 1730 | 47.593 | 107.354 | 96.914  | 0.00 | 0.00 |
| ATOM | 26012 | HZ  | PHE | 1730 | 47.564 | 106.283 | 97.048  | 0.00 | 0.00 |
| ATOM | 26013 | CE2 | PHE | 1730 | 46.531 | 108.094 | 97.380  | 0.00 | 0.00 |
| ATOM | 26014 | HE2 | PHE | 1730 | 45.677 | 107.484 | 97.637  | 0.00 | 0.00 |
| ATOM | 26015 | CD2 | PHE | 1730 | 46.565 | 109.464 | 97.209  | 0.00 | 0.00 |
| ATOM | 26016 | HD2 | PHE | 1730 | 45.679 | 110.017 | 97.484  | 0.00 | 0.00 |
| ATOM | 26017 | C   | PHE | 1730 | 48.629 | 113.840 | 96.200  | 0.00 | 0.00 |
| ATOM | 26018 | O   | PHE | 1730 | 48.126 | 114.838 | 96.623  | 0.00 | 0.00 |
| ATOM | 26019 | N   | ALA | 1731 | 49.202 | 113.753 | 95.005  | 0.00 | 0.00 |

|      |       |     |     |      |        |         |        |      |      |
|------|-------|-----|-----|------|--------|---------|--------|------|------|
| ATOM | 26020 | H   | ALA | 1731 | 49.376 | 112.825 | 94.647 | 0.00 | 0.00 |
| ATOM | 26021 | CA  | ALA | 1731 | 49.584 | 114.893 | 94.146 | 0.00 | 0.00 |
| ATOM | 26022 | HA  | ALA | 1731 | 49.988 | 115.551 | 94.915 | 0.00 | 0.00 |
| ATOM | 26023 | CB  | ALA | 1731 | 50.682 | 114.475 | 93.167 | 0.00 | 0.00 |
| ATOM | 26024 | HB1 | ALA | 1731 | 50.357 | 113.490 | 92.831 | 0.00 | 0.00 |
| ATOM | 26025 | HB2 | ALA | 1731 | 50.883 | 115.213 | 92.390 | 0.00 | 0.00 |
| ATOM | 26026 | HB3 | ALA | 1731 | 51.616 | 114.314 | 93.705 | 0.00 | 0.00 |
| ATOM | 26027 | C   | ALA | 1731 | 48.459 | 115.599 | 93.406 | 0.00 | 0.00 |
| ATOM | 26028 | O   | ALA | 1731 | 47.603 | 114.969 | 92.836 | 0.00 | 0.00 |
| ATOM | 26029 | N   | GLY | 1732 | 48.453 | 116.934 | 93.338 | 0.00 | 0.00 |
| ATOM | 26030 | H   | GLY | 1732 | 49.225 | 117.393 | 93.800 | 0.00 | 0.00 |
| ATOM | 26031 | CA  | GLY | 1732 | 47.462 | 117.728 | 92.610 | 0.00 | 0.00 |
| ATOM | 26032 | HA2 | GLY | 1732 | 47.648 | 118.759 | 92.910 | 0.00 | 0.00 |
| ATOM | 26033 | HA3 | GLY | 1732 | 47.433 | 117.725 | 91.520 | 0.00 | 0.00 |
| ATOM | 26034 | C   | GLY | 1732 | 45.954 | 117.398 | 92.991 | 0.00 | 0.00 |
| ATOM | 26035 | O   | GLY | 1732 | 45.509 | 117.771 | 94.091 | 0.00 | 0.00 |
| ATOM | 26036 | N   | HIE | 1733 | 45.190 | 116.820 | 92.109 | 0.00 | 0.00 |
| ATOM | 26037 | H   | HIE | 1733 | 45.618 | 116.682 | 91.204 | 0.00 | 0.00 |
| ATOM | 26038 | CA  | HIE | 1733 | 43.774 | 116.448 | 92.275 | 0.00 | 0.00 |
| ATOM | 26039 | HA  | HIE | 1733 | 43.238 | 117.352 | 92.565 | 0.00 | 0.00 |
| ATOM | 26040 | CB  | HIE | 1733 | 43.283 | 115.904 | 90.898 | 0.00 | 0.00 |
| ATOM | 26041 | HB2 | HIE | 1733 | 42.285 | 115.466 | 90.860 | 0.00 | 0.00 |
| ATOM | 26042 | HB3 | HIE | 1733 | 43.264 | 116.670 | 90.122 | 0.00 | 0.00 |
| ATOM | 26043 | CG  | HIE | 1733 | 44.068 | 114.745 | 90.325 | 0.00 | 0.00 |
| ATOM | 26044 | ND1 | HIE | 1733 | 44.196 | 113.435 | 90.867 | 0.00 | 0.00 |
| ATOM | 26045 | CE1 | HIE | 1733 | 44.957 | 112.804 | 90.048 | 0.00 | 0.00 |

|      |       |      |     |      |        |         |         |      |      |
|------|-------|------|-----|------|--------|---------|---------|------|------|
| ATOM | 26046 | HE1  | HIE | 1733 | 45.454 | 111.853 | 90.173  | 0.00 | 0.00 |
| ATOM | 26047 | NE2  | HIE | 1733 | 45.229 | 113.511 | 88.957  | 0.00 | 0.00 |
| ATOM | 26048 | HE2  | HIE | 1733 | 45.888 | 113.272 | 88.229  | 0.00 | 0.00 |
| ATOM | 26049 | CD2  | HIE | 1733 | 44.630 | 114.710 | 89.074  | 0.00 | 0.00 |
| ATOM | 26050 | HD2  | HIE | 1733 | 44.684 | 115.532 | 88.376  | 0.00 | 0.00 |
| ATOM | 26051 | C    | HIE | 1733 | 43.486 | 115.440 | 93.403  | 0.00 | 0.00 |
| ATOM | 26052 | O    | HIE | 1733 | 42.301 | 115.292 | 93.745  | 0.00 | 0.00 |
| ATOM | 26053 | N    | ARG | 1734 | 44.546 | 114.780 | 93.968  | 0.00 | 0.00 |
| ATOM | 26054 | H    | ARG | 1734 | 45.494 | 115.038 | 93.734  | 0.00 | 0.00 |
| ATOM | 26055 | CA   | ARG | 1734 | 44.430 | 113.760 | 95.059  | 0.00 | 0.00 |
| ATOM | 26056 | HA   | ARG | 1734 | 45.396 | 113.312 | 95.289  | 0.00 | 0.00 |
| ATOM | 26057 | CB   | ARG | 1734 | 43.742 | 114.187 | 96.331  | 0.00 | 0.00 |
| ATOM | 26058 | HB2  | ARG | 1734 | 42.685 | 114.396 | 96.166  | 0.00 | 0.00 |
| ATOM | 26059 | HB3  | ARG | 1734 | 43.817 | 113.504 | 97.176  | 0.00 | 0.00 |
| ATOM | 26060 | CG   | ARG | 1734 | 44.575 | 115.426 | 96.814  | 0.00 | 0.00 |
| ATOM | 26061 | HG2  | ARG | 1734 | 45.641 | 115.215 | 96.892  | 0.00 | 0.00 |
| ATOM | 26062 | HG3  | ARG | 1734 | 44.404 | 116.372 | 96.299  | 0.00 | 0.00 |
| ATOM | 26063 | CD   | ARG | 1734 | 44.100 | 115.777 | 98.246  | 0.00 | 0.00 |
| ATOM | 26064 | HD2  | ARG | 1734 | 43.043 | 116.005 | 98.101  | 0.00 | 0.00 |
| ATOM | 26065 | HD3  | ARG | 1734 | 44.349 | 115.009 | 98.978  | 0.00 | 0.00 |
| ATOM | 26066 | NE   | ARG | 1734 | 44.741 | 116.993 | 98.800  | 0.00 | 0.00 |
| ATOM | 26067 | HE   | ARG | 1734 | 45.211 | 117.578 | 98.123  | 0.00 | 0.00 |
| ATOM | 26068 | CZ   | ARG | 1734 | 44.600 | 117.430 | 100.005 | 0.00 | 0.00 |
| ATOM | 26069 | NH1  | ARG | 1734 | 43.898 | 116.837 | 100.873 | 0.00 | 0.00 |
| ATOM | 26070 | 1HH1 | ARG | 1734 | 43.493 | 117.383 | 101.620 | 0.00 | 0.00 |
| ATOM | 26071 | 2HH1 | ARG | 1734 | 43.402 | 115.992 | 100.629 | 0.00 | 0.00 |

|      |       |      |     |      |        |         |         |      |      |
|------|-------|------|-----|------|--------|---------|---------|------|------|
| ATOM | 26072 | NH2  | ARG | 1734 | 45.166 | 118.502 | 100.461 | 0.00 | 0.00 |
| ATOM | 26073 | 1HH2 | ARG | 1734 | 44.923 | 118.908 | 101.353 | 0.00 | 0.00 |
| ATOM | 26074 | 2HH2 | ARG | 1734 | 45.676 | 119.111 | 99.838  | 0.00 | 0.00 |
| ATOM | 26075 | C    | ARG | 1734 | 43.683 | 112.509 | 94.541  | 0.00 | 0.00 |
| ATOM | 26076 | O    | ARG | 1734 | 43.447 | 111.659 | 95.342  | 0.00 | 0.00 |
| ATOM | 26077 | N    | ALA | 1735 | 43.205 | 112.472 | 93.358  | 0.00 | 0.00 |
| ATOM | 26078 | H    | ALA | 1735 | 43.473 | 113.222 | 92.738  | 0.00 | 0.00 |
| ATOM | 26079 | CA   | ALA | 1735 | 42.223 | 111.540 | 92.913  | 0.00 | 0.00 |
| ATOM | 26080 | HA   | ALA | 1735 | 41.424 | 111.305 | 93.616  | 0.00 | 0.00 |
| ATOM | 26081 | CB   | ALA | 1735 | 41.425 | 112.136 | 91.784  | 0.00 | 0.00 |
| ATOM | 26082 | HB1  | ALA | 1735 | 40.456 | 111.656 | 91.648  | 0.00 | 0.00 |
| ATOM | 26083 | HB2  | ALA | 1735 | 41.230 | 113.185 | 92.009  | 0.00 | 0.00 |
| ATOM | 26084 | HB3  | ALA | 1735 | 41.906 | 112.155 | 90.806  | 0.00 | 0.00 |
| ATOM | 26085 | C    | ALA | 1735 | 42.807 | 110.179 | 92.630  | 0.00 | 0.00 |
| ATOM | 26086 | O    | ALA | 1735 | 43.786 | 110.188 | 91.853  | 0.00 | 0.00 |
| ATOM | 26087 | N    | VAL | 1736 | 42.087 | 109.031 | 92.886  | 0.00 | 0.00 |
| ATOM | 26088 | H    | VAL | 1736 | 41.194 | 109.086 | 93.356  | 0.00 | 0.00 |
| ATOM | 26089 | CA   | VAL | 1736 | 42.528 | 107.668 | 92.547  | 0.00 | 0.00 |
| ATOM | 26090 | HA   | VAL | 1736 | 43.403 | 107.772 | 91.906  | 0.00 | 0.00 |
| ATOM | 26091 | CB   | VAL | 1736 | 42.936 | 106.836 | 93.793  | 0.00 | 0.00 |
| ATOM | 26092 | HB   | VAL | 1736 | 43.163 | 105.842 | 93.407  | 0.00 | 0.00 |
| ATOM | 26093 | CG1  | VAL | 1736 | 44.261 | 107.368 | 94.374  | 0.00 | 0.00 |
| ATOM | 26094 | 1HG1 | VAL | 1736 | 44.618 | 106.630 | 95.094  | 0.00 | 0.00 |
| ATOM | 26095 | 2HG1 | VAL | 1736 | 44.910 | 107.455 | 93.503  | 0.00 | 0.00 |
| ATOM | 26096 | 3HG1 | VAL | 1736 | 44.014 | 108.306 | 94.872  | 0.00 | 0.00 |
| ATOM | 26097 | CG2  | VAL | 1736 | 41.865 | 106.636 | 94.837  | 0.00 | 0.00 |

|      |       |      |     |      |        |         |        |      |      |
|------|-------|------|-----|------|--------|---------|--------|------|------|
| ATOM | 26098 | 1HG2 | VAL | 1736 | 41.709 | 107.523 | 95.450 | 0.00 | 0.00 |
| ATOM | 26099 | 2HG2 | VAL | 1736 | 40.958 | 106.369 | 94.293 | 0.00 | 0.00 |
| ATOM | 26100 | 3HG2 | VAL | 1736 | 42.257 | 105.858 | 95.493 | 0.00 | 0.00 |
| ATOM | 26101 | C    | VAL | 1736 | 41.488 | 106.880 | 91.660 | 0.00 | 0.00 |
| ATOM | 26102 | O    | VAL | 1736 | 40.249 | 107.012 | 91.783 | 0.00 | 0.00 |
| ATOM | 26103 | N    | PHE | 1737 | 42.035 | 105.803 | 91.001 | 0.00 | 0.00 |
| ATOM | 26104 | H    | PHE | 1737 | 43.039 | 105.693 | 90.999 | 0.00 | 0.00 |
| ATOM | 26105 | CA   | PHE | 1737 | 41.240 | 104.645 | 90.646 | 0.00 | 0.00 |
| ATOM | 26106 | HA   | PHE | 1737 | 40.420 | 104.564 | 91.360 | 0.00 | 0.00 |
| ATOM | 26107 | CB   | PHE | 1737 | 40.475 | 104.721 | 89.329 | 0.00 | 0.00 |
| ATOM | 26108 | HB2  | PHE | 1737 | 39.963 | 105.681 | 89.273 | 0.00 | 0.00 |
| ATOM | 26109 | HB3  | PHE | 1737 | 41.198 | 104.606 | 88.522 | 0.00 | 0.00 |
| ATOM | 26110 | CG   | PHE | 1737 | 39.395 | 103.684 | 89.185 | 0.00 | 0.00 |
| ATOM | 26111 | CD1  | PHE | 1737 | 38.293 | 103.809 | 90.036 | 0.00 | 0.00 |
| ATOM | 26112 | HD1  | PHE | 1737 | 38.231 | 104.615 | 90.751 | 0.00 | 0.00 |
| ATOM | 26113 | CE1  | PHE | 1737 | 37.213 | 102.901 | 90.012 | 0.00 | 0.00 |
| ATOM | 26114 | HE1  | PHE | 1737 | 36.312 | 103.108 | 90.571 | 0.00 | 0.00 |
| ATOM | 26115 | CZ   | PHE | 1737 | 37.178 | 101.924 | 89.014 | 0.00 | 0.00 |
| ATOM | 26116 | HZ   | PHE | 1737 | 36.345 | 101.248 | 88.898 | 0.00 | 0.00 |
| ATOM | 26117 | CE2  | PHE | 1737 | 38.355 | 101.729 | 88.199 | 0.00 | 0.00 |
| ATOM | 26118 | HE2  | PHE | 1737 | 38.310 | 100.962 | 87.439 | 0.00 | 0.00 |
| ATOM | 26119 | CD2  | PHE | 1737 | 39.473 | 102.575 | 88.350 | 0.00 | 0.00 |
| ATOM | 26120 | HD2  | PHE | 1737 | 40.356 | 102.410 | 87.751 | 0.00 | 0.00 |
| ATOM | 26121 | C    | PHE | 1737 | 42.124 | 103.429 | 90.919 | 0.00 | 0.00 |
| ATOM | 26122 | O    | PHE | 1737 | 43.340 | 103.558 | 91.181 | 0.00 | 0.00 |
| ATOM | 26123 | N    | GLY | 1738 | 41.560 | 102.206 | 90.907 | 0.00 | 0.00 |



|      |       |     |     |      |        |         |        |      |      |
|------|-------|-----|-----|------|--------|---------|--------|------|------|
| ATOM | 26124 | H   | GLY | 1738 | 40.552 | 102.256 | 90.918 | 0.00 | 0.00 |
| ATOM | 26125 | CA  | GLY | 1738 | 42.191 | 101.109 | 91.640 | 0.00 | 0.00 |
| ATOM | 26126 | HA2 | GLY | 1738 | 41.907 | 100.193 | 91.123 | 0.00 | 0.00 |
| ATOM | 26127 | HA3 | GLY | 1738 | 43.278 | 101.089 | 91.721 | 0.00 | 0.00 |
| ATOM | 26128 | C   | GLY | 1738 | 41.462 | 101.094 | 93.059 | 0.00 | 0.00 |
| ATOM | 26129 | O   | GLY | 1738 | 40.401 | 101.673 | 93.344 | 0.00 | 0.00 |
| ATOM | 26130 | N   | PHE | 1739 | 42.088 | 100.353 | 93.922 | 0.00 | 0.00 |
| ATOM | 26131 | H   | PHE | 1739 | 42.897 | 99.808  | 93.659 | 0.00 | 0.00 |
| ATOM | 26132 | CA  | PHE | 1739 | 41.433 | 100.010 | 95.269 | 0.00 | 0.00 |
| ATOM | 26133 | HA  | PHE | 1739 | 42.072 | 99.247  | 95.714 | 0.00 | 0.00 |
| ATOM | 26134 | CB  | PHE | 1739 | 41.419 | 101.266 | 96.198 | 0.00 | 0.00 |
| ATOM | 26135 | HB2 | PHE | 1739 | 40.703 | 102.016 | 95.861 | 0.00 | 0.00 |
| ATOM | 26136 | HB3 | PHE | 1739 | 41.168 | 101.025 | 97.231 | 0.00 | 0.00 |
| ATOM | 26137 | CG  | PHE | 1739 | 42.876 | 101.957 | 96.151 | 0.00 | 0.00 |
| ATOM | 26138 | CD1 | PHE | 1739 | 43.104 | 103.110 | 95.421 | 0.00 | 0.00 |
| ATOM | 26139 | HD1 | PHE | 1739 | 42.275 | 103.528 | 94.870 | 0.00 | 0.00 |
| ATOM | 26140 | CE1 | PHE | 1739 | 44.365 | 103.646 | 95.315 | 0.00 | 0.00 |
| ATOM | 26141 | HE1 | PHE | 1739 | 44.631 | 104.496 | 94.705 | 0.00 | 0.00 |
| ATOM | 26142 | CZ  | PHE | 1739 | 45.406 | 103.039 | 95.990 | 0.00 | 0.00 |
| ATOM | 26143 | HZ  | PHE | 1739 | 46.372 | 103.521 | 96.028 | 0.00 | 0.00 |
| ATOM | 26144 | CE2 | PHE | 1739 | 45.234 | 101.804 | 96.618 | 0.00 | 0.00 |
| ATOM | 26145 | HE2 | PHE | 1739 | 46.027 | 101.163 | 96.975 | 0.00 | 0.00 |
| ATOM | 26146 | CD2 | PHE | 1739 | 43.967 | 101.300 | 96.772 | 0.00 | 0.00 |
| ATOM | 26147 | HD2 | PHE | 1739 | 43.769 | 100.385 | 97.310 | 0.00 | 0.00 |
| ATOM | 26148 | C   | PHE | 1739 | 40.109 | 99.256  | 95.222 | 0.00 | 0.00 |
| ATOM | 26149 | O   | PHE | 1739 | 39.993 | 98.265  | 94.540 | 0.00 | 0.00 |

|      |       |      |     |      |        |         |         |      |      |
|------|-------|------|-----|------|--------|---------|---------|------|------|
| ATOM | 26150 | N    | ARG | 1740 | 39.070 | 99.632  | 96.004  | 0.00 | 0.00 |
| ATOM | 26151 | H    | ARG | 1740 | 39.128 | 100.518 | 96.483  | 0.00 | 0.00 |
| ATOM | 26152 | CA   | ARG | 1740 | 37.676 | 99.041  | 95.973  | 0.00 | 0.00 |
| ATOM | 26153 | HA   | ARG | 1740 | 37.689 | 97.962  | 95.817  | 0.00 | 0.00 |
| ATOM | 26154 | CB   | ARG | 1740 | 36.902 | 99.301  | 97.300  | 0.00 | 0.00 |
| ATOM | 26155 | HB2  | ARG | 1740 | 36.928 | 100.354 | 97.581  | 0.00 | 0.00 |
| ATOM | 26156 | HB3  | ARG | 1740 | 35.916 | 98.851  | 97.193  | 0.00 | 0.00 |
| ATOM | 26157 | CG   | ARG | 1740 | 37.575 | 98.521  | 98.516  | 0.00 | 0.00 |
| ATOM | 26158 | HG2  | ARG | 1740 | 37.711 | 97.485  | 98.206  | 0.00 | 0.00 |
| ATOM | 26159 | HG3  | ARG | 1740 | 38.541 | 98.980  | 98.728  | 0.00 | 0.00 |
| ATOM | 26160 | CD   | ARG | 1740 | 36.791 | 98.534  | 99.825  | 0.00 | 0.00 |
| ATOM | 26161 | HD2  | ARG | 1740 | 37.385 | 97.938  | 100.518 | 0.00 | 0.00 |
| ATOM | 26162 | HD3  | ARG | 1740 | 36.578 | 99.555  | 100.144 | 0.00 | 0.00 |
| ATOM | 26163 | NE   | ARG | 1740 | 35.453 | 97.905  | 99.735  | 0.00 | 0.00 |
| ATOM | 26164 | HE   | ARG | 1740 | 34.685 | 98.524  | 99.522  | 0.00 | 0.00 |
| ATOM | 26165 | CZ   | ARG | 1740 | 35.177 | 96.665  | 99.658  | 0.00 | 0.00 |
| ATOM | 26166 | NH1  | ARG | 1740 | 33.927 | 96.267  | 99.610  | 0.00 | 0.00 |
| ATOM | 26167 | 1HH1 | ARG | 1740 | 33.838 | 95.279  | 99.420  | 0.00 | 0.00 |
| ATOM | 26168 | 2HH1 | ARG | 1740 | 33.189 | 96.937  | 99.773  | 0.00 | 0.00 |
| ATOM | 26169 | NH2  | ARG | 1740 | 36.145 | 95.805  | 99.650  | 0.00 | 0.00 |
| ATOM | 26170 | 1HH2 | ARG | 1740 | 35.997 | 94.805  | 99.648  | 0.00 | 0.00 |
| ATOM | 26171 | 2HH2 | ARG | 1740 | 37.083 | 96.112  | 99.861  | 0.00 | 0.00 |
| ATOM | 26172 | C    | ARG | 1740 | 36.818 | 99.630  | 94.764  | 0.00 | 0.00 |
| ATOM | 26173 | O    | ARG | 1740 | 35.837 | 99.054  | 94.364  | 0.00 | 0.00 |
| ATOM | 26174 | N    | GLY | 1741 | 37.289 | 100.736 | 94.181  | 0.00 | 0.00 |
| ATOM | 26175 | H    | GLY | 1741 | 38.027 | 101.133 | 94.743  | 0.00 | 0.00 |

|      |       |     |     |      |        |         |        |      |      |
|------|-------|-----|-----|------|--------|---------|--------|------|------|
| ATOM | 26176 | CA  | GLY | 1741 | 36.787 | 101.549 | 93.117 | 0.00 | 0.00 |
| ATOM | 26177 | HA2 | GLY | 1741 | 37.550 | 102.233 | 92.745 | 0.00 | 0.00 |
| ATOM | 26178 | HA3 | GLY | 1741 | 36.550 | 100.867 | 92.301 | 0.00 | 0.00 |
| ATOM | 26179 | C   | GLY | 1741 | 35.595 | 102.275 | 93.630 | 0.00 | 0.00 |
| ATOM | 26180 | O   | GLY | 1741 | 34.678 | 102.636 | 92.891 | 0.00 | 0.00 |
| ATOM | 26181 | N   | GLU | 1742 | 35.663 | 102.669 | 94.900 | 0.00 | 0.00 |
| ATOM | 26182 | H   | GLU | 1742 | 36.510 | 102.423 | 95.393 | 0.00 | 0.00 |
| ATOM | 26183 | CA  | GLU | 1742 | 34.386 | 103.032 | 95.582 | 0.00 | 0.00 |
| ATOM | 26184 | HA  | GLU | 1742 | 33.554 | 102.917 | 94.888 | 0.00 | 0.00 |
| ATOM | 26185 | CB  | GLU | 1742 | 34.096 | 101.941 | 96.658 | 0.00 | 0.00 |
| ATOM | 26186 | HB2 | GLU | 1742 | 34.201 | 100.966 | 96.183 | 0.00 | 0.00 |
| ATOM | 26187 | HB3 | GLU | 1742 | 34.892 | 101.944 | 97.403 | 0.00 | 0.00 |
| ATOM | 26188 | CG  | GLU | 1742 | 32.702 | 102.088 | 97.279 | 0.00 | 0.00 |
| ATOM | 26189 | HG2 | GLU | 1742 | 32.611 | 103.136 | 97.565 | 0.00 | 0.00 |
| ATOM | 26190 | HG3 | GLU | 1742 | 32.125 | 101.800 | 96.400 | 0.00 | 0.00 |
| ATOM | 26191 | CD  | GLU | 1742 | 32.604 | 101.170 | 98.451 | 0.00 | 0.00 |
| ATOM | 26192 | OE1 | GLU | 1742 | 32.313 | 99.934  | 98.327 | 0.00 | 0.00 |
| ATOM | 26193 | OE2 | GLU | 1742 | 32.554 | 101.666 | 99.626 | 0.00 | 0.00 |
| ATOM | 26194 | C   | GLU | 1742 | 34.348 | 104.507 | 96.013 | 0.00 | 0.00 |
| ATOM | 26195 | O   | GLU | 1742 | 33.367 | 105.215 | 95.914 | 0.00 | 0.00 |
| ATOM | 26196 | N   | VAL | 1743 | 35.490 | 104.939 | 96.552 | 0.00 | 0.00 |
| ATOM | 26197 | H   | VAL | 1743 | 36.288 | 104.326 | 96.467 | 0.00 | 0.00 |
| ATOM | 26198 | CA  | VAL | 1743 | 35.832 | 106.280 | 97.117 | 0.00 | 0.00 |
| ATOM | 26199 | HA  | VAL | 1743 | 34.872 | 106.658 | 97.468 | 0.00 | 0.00 |
| ATOM | 26200 | CB  | VAL | 1743 | 36.529 | 106.180 | 98.494 | 0.00 | 0.00 |
| ATOM | 26201 | HB  | VAL | 1743 | 37.571 | 105.923 | 98.301 | 0.00 | 0.00 |

|      |       |          |      |        |         |         |      |      |
|------|-------|----------|------|--------|---------|---------|------|------|
| ATOM | 26202 | CG1 VAL  | 1743 | 36.387 | 107.620 | 99.092  | 0.00 | 0.00 |
| ATOM | 26203 | 1HG1 VAL | 1743 | 36.631 | 107.616 | 100.154 | 0.00 | 0.00 |
| ATOM | 26204 | 2HG1 VAL | 1743 | 36.932 | 108.340 | 98.481  | 0.00 | 0.00 |
| ATOM | 26205 | 3HG1 VAL | 1743 | 35.317 | 107.822 | 99.036  | 0.00 | 0.00 |
| ATOM | 26206 | CG2 VAL  | 1743 | 35.908 | 105.154 | 99.507  | 0.00 | 0.00 |
| ATOM | 26207 | 1HG2 VAL | 1743 | 34.879 | 105.504 | 99.585  | 0.00 | 0.00 |
| ATOM | 26208 | 2HG2 VAL | 1743 | 35.820 | 104.155 | 99.080  | 0.00 | 0.00 |
| ATOM | 26209 | 3HG2 VAL | 1743 | 36.481 | 105.178 | 100.434 | 0.00 | 0.00 |
| ATOM | 26210 | C VAL    | 1743 | 36.455 | 107.249 | 96.092  | 0.00 | 0.00 |
| ATOM | 26211 | O VAL    | 1743 | 35.980 | 108.385 | 95.937  | 0.00 | 0.00 |
| ATOM | 26212 | N MET    | 1744 | 37.402 | 106.641 | 95.303  | 0.00 | 0.00 |
| ATOM | 26213 | H MET    | 1744 | 37.716 | 105.779 | 95.725  | 0.00 | 0.00 |
| ATOM | 26214 | CA MET   | 1744 | 37.957 | 107.210 | 94.101  | 0.00 | 0.00 |
| ATOM | 26215 | HA MET   | 1744 | 38.658 | 106.429 | 93.807  | 0.00 | 0.00 |
| ATOM | 26216 | CB MET   | 1744 | 36.814 | 107.375 | 93.090  | 0.00 | 0.00 |
| ATOM | 26217 | HB2 MET  | 1744 | 36.221 | 108.247 | 93.362  | 0.00 | 0.00 |
| ATOM | 26218 | HB3 MET  | 1744 | 37.301 | 107.461 | 92.119  | 0.00 | 0.00 |
| ATOM | 26219 | CG MET   | 1744 | 35.661 | 106.345 | 93.008  | 0.00 | 0.00 |
| ATOM | 26220 | HG2 MET  | 1744 | 36.051 | 105.347 | 92.806  | 0.00 | 0.00 |
| ATOM | 26221 | HG3 MET  | 1744 | 35.140 | 106.282 | 93.963  | 0.00 | 0.00 |
| ATOM | 26222 | SD MET   | 1744 | 34.556 | 106.628 | 91.677  | 0.00 | 0.00 |
| ATOM | 26223 | CE MET   | 1744 | 33.804 | 105.067 | 91.196  | 0.00 | 0.00 |
| ATOM | 26224 | HE1 MET  | 1744 | 33.276 | 104.830 | 92.120  | 0.00 | 0.00 |
| ATOM | 26225 | HE2 MET  | 1744 | 33.152 | 105.168 | 90.328  | 0.00 | 0.00 |
| ATOM | 26226 | HE3 MET  | 1744 | 34.489 | 104.267 | 90.916  | 0.00 | 0.00 |
| ATOM | 26227 | C MET    | 1744 | 38.840 | 108.510 | 94.199  | 0.00 | 0.00 |

|      |       |     |     |      |        |         |         |      |      |
|------|-------|-----|-----|------|--------|---------|---------|------|------|
| ATOM | 26228 | O   | MET | 1744 | 39.206 | 109.158 | 93.237  | 0.00 | 0.00 |
| ATOM | 26229 | N   | GLY | 1745 | 39.120 | 108.907 | 95.460  | 0.00 | 0.00 |
| ATOM | 26230 | H   | GLY | 1745 | 38.645 | 108.483 | 96.245  | 0.00 | 0.00 |
| ATOM | 26231 | CA  | GLY | 1745 | 39.795 | 110.160 | 95.811  | 0.00 | 0.00 |
| ATOM | 26232 | HA2 | GLY | 1745 | 40.828 | 109.860 | 95.987  | 0.00 | 0.00 |
| ATOM | 26233 | HA3 | GLY | 1745 | 39.701 | 110.842 | 94.966  | 0.00 | 0.00 |
| ATOM | 26234 | C   | GLY | 1745 | 39.262 | 110.806 | 97.106  | 0.00 | 0.00 |
| ATOM | 26235 | O   | GLY | 1745 | 38.968 | 110.124 | 98.061  | 0.00 | 0.00 |
| ATOM | 26236 | N   | PRO | 1746 | 39.008 | 112.091 | 97.090  | 0.00 | 0.00 |
| ATOM | 26237 | CD  | PRO | 1746 | 39.564 | 113.104 | 96.167  | 0.00 | 0.00 |
| ATOM | 26238 | HD2 | PRO | 1746 | 40.440 | 112.695 | 95.662  | 0.00 | 0.00 |
| ATOM | 26239 | HD3 | PRO | 1746 | 38.804 | 113.361 | 95.429  | 0.00 | 0.00 |
| ATOM | 26240 | CG  | PRO | 1746 | 39.964 | 114.273 | 97.060  | 0.00 | 0.00 |
| ATOM | 26241 | HG2 | PRO | 1746 | 40.897 | 114.012 | 97.560  | 0.00 | 0.00 |
| ATOM | 26242 | HG3 | PRO | 1746 | 39.960 | 115.152 | 96.416  | 0.00 | 0.00 |
| ATOM | 26243 | CB  | PRO | 1746 | 38.694 | 114.306 | 97.926  | 0.00 | 0.00 |
| ATOM | 26244 | HB2 | PRO | 1746 | 38.910 | 114.644 | 98.940  | 0.00 | 0.00 |
| ATOM | 26245 | HB3 | PRO | 1746 | 37.938 | 114.877 | 97.388  | 0.00 | 0.00 |
| ATOM | 26246 | CA  | PRO | 1746 | 38.268 | 112.840 | 98.123  | 0.00 | 0.00 |
| ATOM | 26247 | HA  | PRO | 1746 | 38.602 | 112.485 | 99.098  | 0.00 | 0.00 |
| ATOM | 26248 | C   | PRO | 1746 | 36.756 | 112.644 | 98.156  | 0.00 | 0.00 |
| ATOM | 26249 | O   | PRO | 1746 | 36.224 | 112.397 | 97.078  | 0.00 | 0.00 |
| ATOM | 26250 | N   | LEC | 1747 | 36.130 | 112.790 | 99.322  | 0.00 | 0.00 |
| ATOM | 26251 | H   | LEC | 1747 | 36.644 | 112.873 | 100.188 | 0.00 | 0.00 |
| ATOM | 26252 | CA  | LEC | 1747 | 34.680 | 112.525 | 99.643  | 0.00 | 0.00 |
| ATOM | 26253 | HA  | LEC | 1747 | 34.248 | 112.628 | 98.647  | 0.00 | 0.00 |

|      |       |      |     |      |        |         |         |      |      |
|------|-------|------|-----|------|--------|---------|---------|------|------|
| ATOM | 26254 | CB   | LEC | 1747 | 34.518 | 111.105 | 100.105 | 0.00 | 0.00 |
| ATOM | 26255 | HB2  | LEC | 1747 | 35.240 | 110.440 | 99.631  | 0.00 | 0.00 |
| ATOM | 26256 | HB3  | LEC | 1747 | 34.972 | 111.084 | 101.096 | 0.00 | 0.00 |
| ATOM | 26257 | CG   | LEC | 1747 | 33.075 | 110.552 | 100.108 | 0.00 | 0.00 |
| ATOM | 26258 | HG   | LEC | 1747 | 32.372 | 111.244 | 100.573 | 0.00 | 0.00 |
| ATOM | 26259 | CD1  | LEC | 1747 | 32.560 | 110.031 | 98.753  | 0.00 | 0.00 |
| ATOM | 26260 | 1HD1 | LEC | 1747 | 31.667 | 109.415 | 98.863  | 0.00 | 0.00 |
| ATOM | 26261 | 2HD1 | LEC | 1747 | 32.415 | 110.914 | 98.131  | 0.00 | 0.00 |
| ATOM | 26262 | 3HD1 | LEC | 1747 | 33.283 | 109.375 | 98.269  | 0.00 | 0.00 |
| ATOM | 26263 | CD2  | LEC | 1747 | 33.111 | 109.301 | 101.084 | 0.00 | 0.00 |
| ATOM | 26264 | 1HD2 | LEC | 1747 | 33.769 | 108.550 | 100.647 | 0.00 | 0.00 |
| ATOM | 26265 | 2HD2 | LEC | 1747 | 33.337 | 109.679 | 102.080 | 0.00 | 0.00 |
| ATOM | 26266 | 3HD2 | LEC | 1747 | 32.057 | 109.026 | 101.122 | 0.00 | 0.00 |
| ATOM | 26267 | C    | LEC | 1747 | 34.026 | 113.557 | 100.554 | 0.00 | 0.00 |
| ATOM | 26268 | O    | LEC | 1747 | 32.983 | 114.078 | 100.269 | 0.00 | 0.00 |
| ATOM | 26269 | OXT  | LEC | 1747 | 34.735 | 113.992 | 101.546 | 0.00 | 0.00 |
| ATOM | 26270 | N    | SEN | 1748 | 57.527 | 111.275 | 108.461 | 0.00 | 0.00 |
| ATOM | 26271 | H1   | SEN | 1748 | 57.702 | 112.210 | 108.801 | 0.00 | 0.00 |
| ATOM | 26272 | H2   | SEN | 1748 | 56.610 | 110.905 | 108.670 | 0.00 | 0.00 |
| ATOM | 26273 | H3   | SEN | 1748 | 57.673 | 111.217 | 107.464 | 0.00 | 0.00 |
| ATOM | 26274 | CA   | SEN | 1748 | 58.379 | 110.328 | 109.227 | 0.00 | 0.00 |
| ATOM | 26275 | HA   | SEN | 1748 | 58.159 | 110.476 | 110.284 | 0.00 | 0.00 |
| ATOM | 26276 | CB   | SEN | 1748 | 58.319 | 108.896 | 108.728 | 0.00 | 0.00 |
| ATOM | 26277 | HB2  | SEN | 1748 | 58.613 | 108.741 | 107.689 | 0.00 | 0.00 |
| ATOM | 26278 | HB3  | SEN | 1748 | 59.011 | 108.344 | 109.363 | 0.00 | 0.00 |
| ATOM | 26279 | OG   | SEN | 1748 | 57.051 | 108.441 | 108.872 | 0.00 | 0.00 |

|      |       |      |     |      |        |         |         |      |      |
|------|-------|------|-----|------|--------|---------|---------|------|------|
| ATOM | 26280 | HG   | SEN | 1748 | 57.117 | 107.618 | 109.362 | 0.00 | 0.00 |
| ATOM | 26281 | C    | SEN | 1748 | 59.835 | 110.637 | 109.121 | 0.00 | 0.00 |
| ATOM | 26282 | O    | SEN | 1748 | 60.205 | 111.194 | 108.103 | 0.00 | 0.00 |
| ATOM | 26283 | N    | ASN | 1749 | 60.627 | 110.237 | 110.136 | 0.00 | 0.00 |
| ATOM | 26284 | H    | ASN | 1749 | 60.206 | 109.718 | 110.893 | 0.00 | 0.00 |
| ATOM | 26285 | CA   | ASN | 1749 | 62.036 | 110.167 | 110.198 | 0.00 | 0.00 |
| ATOM | 26286 | HA   | ASN | 1749 | 62.506 | 110.865 | 109.505 | 0.00 | 0.00 |
| ATOM | 26287 | CB   | ASN | 1749 | 62.529 | 110.714 | 111.572 | 0.00 | 0.00 |
| ATOM | 26288 | HB2  | ASN | 1749 | 61.897 | 111.554 | 111.863 | 0.00 | 0.00 |
| ATOM | 26289 | HB3  | ASN | 1749 | 62.384 | 109.951 | 112.337 | 0.00 | 0.00 |
| ATOM | 26290 | CG   | ASN | 1749 | 63.954 | 111.257 | 111.627 | 0.00 | 0.00 |
| ATOM | 26291 | OD1  | ASN | 1749 | 64.613 | 111.546 | 110.636 | 0.00 | 0.00 |
| ATOM | 26292 | ND2  | ASN | 1749 | 64.600 | 111.280 | 112.741 | 0.00 | 0.00 |
| ATOM | 26293 | 1HD2 | ASN | 1749 | 65.564 | 111.578 | 112.717 | 0.00 | 0.00 |
| ATOM | 26294 | 2HD2 | ASN | 1749 | 64.144 | 111.254 | 113.642 | 0.00 | 0.00 |
| ATOM | 26295 | C    | ASN | 1749 | 62.599 | 108.704 | 109.949 | 0.00 | 0.00 |
| ATOM | 26296 | O    | ASN | 1749 | 61.834 | 107.715 | 110.251 | 0.00 | 0.00 |
| ATOM | 26297 | N    | ILE | 1750 | 63.898 | 108.610 | 109.481 | 0.00 | 0.00 |
| ATOM | 26298 | H    | ILE | 1750 | 64.403 | 109.475 | 109.353 | 0.00 | 0.00 |
| ATOM | 26299 | CA   | ILE | 1750 | 64.623 | 107.360 | 109.241 | 0.00 | 0.00 |
| ATOM | 26300 | HA   | ILE | 1750 | 64.326 | 106.766 | 110.106 | 0.00 | 0.00 |
| ATOM | 26301 | CB   | ILE | 1750 | 64.168 | 106.790 | 107.917 | 0.00 | 0.00 |
| ATOM | 26302 | HB   | ILE | 1750 | 63.115 | 106.594 | 108.121 | 0.00 | 0.00 |
| ATOM | 26303 | CG2  | ILE | 1750 | 64.317 | 107.605 | 106.651 | 0.00 | 0.00 |
| ATOM | 26304 | 1HG2 | ILE | 1750 | 63.710 | 107.160 | 105.862 | 0.00 | 0.00 |
| ATOM | 26305 | 2HG2 | ILE | 1750 | 63.935 | 108.621 | 106.745 | 0.00 | 0.00 |

|      |       |      |     |      |        |         |         |      |      |
|------|-------|------|-----|------|--------|---------|---------|------|------|
| ATOM | 26306 | 3HG2 | ILE | 1750 | 65.331 | 107.715 | 106.266 | 0.00 | 0.00 |
| ATOM | 26307 | CG1  | ILE | 1750 | 64.802 | 105.383 | 107.802 | 0.00 | 0.00 |
| ATOM | 26308 | 2HG1 | ILE | 1750 | 65.888 | 105.444 | 107.863 | 0.00 | 0.00 |
| ATOM | 26309 | 3HG1 | ILE | 1750 | 64.345 | 104.733 | 108.548 | 0.00 | 0.00 |
| ATOM | 26310 | CD1  | ILE | 1750 | 64.564 | 104.650 | 106.468 | 0.00 | 0.00 |
| ATOM | 26311 | 1HD1 | ILE | 1750 | 63.523 | 104.885 | 106.247 | 0.00 | 0.00 |
| ATOM | 26312 | 2HD1 | ILE | 1750 | 65.258 | 104.948 | 105.682 | 0.00 | 0.00 |
| ATOM | 26313 | 3HD1 | ILE | 1750 | 64.647 | 103.585 | 106.687 | 0.00 | 0.00 |
| ATOM | 26314 | C    | ILE | 1750 | 66.131 | 107.595 | 109.437 | 0.00 | 0.00 |
| ATOM | 26315 | O    | ILE | 1750 | 66.646 | 108.607 | 108.895 | 0.00 | 0.00 |
| ATOM | 26316 | N    | SER | 1751 | 66.889 | 106.772 | 110.187 | 0.00 | 0.00 |
| ATOM | 26317 | H    | SER | 1751 | 66.434 | 105.977 | 110.612 | 0.00 | 0.00 |
| ATOM | 26318 | CA   | SER | 1751 | 68.340 | 106.913 | 110.127 | 0.00 | 0.00 |
| ATOM | 26319 | HA   | SER | 1751 | 68.446 | 107.889 | 110.600 | 0.00 | 0.00 |
| ATOM | 26320 | CB   | SER | 1751 | 69.070 | 105.914 | 111.092 | 0.00 | 0.00 |
| ATOM | 26321 | HB2  | SER | 1751 | 69.819 | 106.404 | 111.715 | 0.00 | 0.00 |
| ATOM | 26322 | HB3  | SER | 1751 | 68.272 | 105.621 | 111.775 | 0.00 | 0.00 |
| ATOM | 26323 | OG   | SER | 1751 | 69.755 | 104.777 | 110.510 | 0.00 | 0.00 |
| ATOM | 26324 | HG   | SER | 1751 | 69.841 | 104.216 | 111.285 | 0.00 | 0.00 |
| ATOM | 26325 | C    | SER | 1751 | 68.951 | 106.856 | 108.736 | 0.00 | 0.00 |
| ATOM | 26326 | O    | SER | 1751 | 68.481 | 106.057 | 107.947 | 0.00 | 0.00 |
| ATOM | 26327 | N    | ARG | 1752 | 70.055 | 107.524 | 108.524 | 0.00 | 0.00 |
| ATOM | 26328 | H    | ARG | 1752 | 70.421 | 108.016 | 109.326 | 0.00 | 0.00 |
| ATOM | 26329 | CA   | ARG | 1752 | 70.652 | 107.680 | 107.143 | 0.00 | 0.00 |
| ATOM | 26330 | HA   | ARG | 1752 | 69.879 | 107.969 | 106.432 | 0.00 | 0.00 |
| ATOM | 26331 | CB   | ARG | 1752 | 71.607 | 108.834 | 107.108 | 0.00 | 0.00 |



|      |       |      |     |      |        |         |         |      |      |
|------|-------|------|-----|------|--------|---------|---------|------|------|
| ATOM | 26332 | HB2  | ARG | 1752 | 71.174 | 109.741 | 107.530 | 0.00 | 0.00 |
| ATOM | 26333 | HB3  | ARG | 1752 | 72.407 | 108.552 | 107.793 | 0.00 | 0.00 |
| ATOM | 26334 | CG   | ARG | 1752 | 72.233 | 109.198 | 105.745 | 0.00 | 0.00 |
| ATOM | 26335 | HG2  | ARG | 1752 | 71.491 | 109.034 | 104.963 | 0.00 | 0.00 |
| ATOM | 26336 | HG3  | ARG | 1752 | 72.978 | 108.434 | 105.520 | 0.00 | 0.00 |
| ATOM | 26337 | CD   | ARG | 1752 | 72.831 | 110.577 | 105.763 | 0.00 | 0.00 |
| ATOM | 26338 | HD2  | ARG | 1752 | 72.158 | 111.332 | 106.168 | 0.00 | 0.00 |
| ATOM | 26339 | HD3  | ARG | 1752 | 73.818 | 110.440 | 106.206 | 0.00 | 0.00 |
| ATOM | 26340 | NE   | ARG | 1752 | 72.931 | 110.923 | 104.321 | 0.00 | 0.00 |
| ATOM | 26341 | HE   | ARG | 1752 | 72.224 | 111.535 | 103.938 | 0.00 | 0.00 |
| ATOM | 26342 | CZ   | ARG | 1752 | 73.851 | 110.526 | 103.475 | 0.00 | 0.00 |
| ATOM | 26343 | NH1  | ARG | 1752 | 74.855 | 109.827 | 103.872 | 0.00 | 0.00 |
| ATOM | 26344 | 1HH1 | ARG | 1752 | 75.522 | 109.585 | 103.153 | 0.00 | 0.00 |
| ATOM | 26345 | 2HH1 | ARG | 1752 | 74.704 | 109.300 | 104.720 | 0.00 | 0.00 |
| ATOM | 26346 | NH2  | ARG | 1752 | 73.826 | 110.881 | 102.215 | 0.00 | 0.00 |
| ATOM | 26347 | 1HH2 | ARG | 1752 | 74.599 | 110.583 | 101.637 | 0.00 | 0.00 |
| ATOM | 26348 | 2HH2 | ARG | 1752 | 72.961 | 111.201 | 101.804 | 0.00 | 0.00 |
| ATOM | 26349 | C    | ARG | 1752 | 71.230 | 106.340 | 106.741 | 0.00 | 0.00 |
| ATOM | 26350 | O    | ARG | 1752 | 71.122 | 105.885 | 105.564 | 0.00 | 0.00 |
| ATOM | 26351 | N    | GLN | 1753 | 71.790 | 105.535 | 107.696 | 0.00 | 0.00 |
| ATOM | 26352 | H    | GLN | 1753 | 71.765 | 105.834 | 108.660 | 0.00 | 0.00 |
| ATOM | 26353 | CA   | GLN | 1753 | 72.368 | 104.176 | 107.595 | 0.00 | 0.00 |
| ATOM | 26354 | HA   | GLN | 1753 | 73.144 | 104.162 | 106.830 | 0.00 | 0.00 |
| ATOM | 26355 | CB   | GLN | 1753 | 73.059 | 103.728 | 108.907 | 0.00 | 0.00 |
| ATOM | 26356 | HB2  | GLN | 1753 | 72.274 | 103.579 | 109.648 | 0.00 | 0.00 |
| ATOM | 26357 | HB3  | GLN | 1753 | 73.547 | 102.784 | 108.660 | 0.00 | 0.00 |

|      |       |      |     |      |        |         |         |      |      |
|------|-------|------|-----|------|--------|---------|---------|------|------|
| ATOM | 26358 | CG   | GLN | 1753 | 74.056 | 104.659 | 109.434 | 0.00 | 0.00 |
| ATOM | 26359 | HG2  | GLN | 1753 | 74.720 | 104.061 | 110.057 | 0.00 | 0.00 |
| ATOM | 26360 | HG3  | GLN | 1753 | 74.512 | 105.171 | 108.586 | 0.00 | 0.00 |
| ATOM | 26361 | CD   | GLN | 1753 | 73.378 | 105.712 | 110.293 | 0.00 | 0.00 |
| ATOM | 26362 | OE1  | GLN | 1753 | 72.898 | 106.742 | 109.839 | 0.00 | 0.00 |
| ATOM | 26363 | NE2  | GLN | 1753 | 73.477 | 105.601 | 111.557 | 0.00 | 0.00 |
| ATOM | 26364 | 1HE2 | GLN | 1753 | 72.966 | 106.272 | 112.114 | 0.00 | 0.00 |
| ATOM | 26365 | 2HE2 | GLN | 1753 | 74.010 | 104.886 | 112.032 | 0.00 | 0.00 |
| ATOM | 26366 | C    | GLN | 1753 | 71.298 | 103.115 | 107.107 | 0.00 | 0.00 |
| ATOM | 26367 | O    | GLN | 1753 | 71.663 | 102.204 | 106.333 | 0.00 | 0.00 |
| ATOM | 26368 | N    | ALA | 1754 | 70.025 | 103.338 | 107.376 | 0.00 | 0.00 |
| ATOM | 26369 | H    | ALA | 1754 | 69.775 | 104.150 | 107.922 | 0.00 | 0.00 |
| ATOM | 26370 | CA   | ALA | 1754 | 68.872 | 102.515 | 107.029 | 0.00 | 0.00 |
| ATOM | 26371 | HA   | ALA | 1754 | 69.118 | 101.461 | 106.902 | 0.00 | 0.00 |
| ATOM | 26372 | CB   | ALA | 1754 | 67.857 | 102.677 | 108.159 | 0.00 | 0.00 |
| ATOM | 26373 | HB1  | ALA | 1754 | 68.276 | 102.253 | 109.072 | 0.00 | 0.00 |
| ATOM | 26374 | HB2  | ALA | 1754 | 67.642 | 103.736 | 108.308 | 0.00 | 0.00 |
| ATOM | 26375 | HB3  | ALA | 1754 | 66.890 | 102.189 | 108.034 | 0.00 | 0.00 |
| ATOM | 26376 | C    | ALA | 1754 | 68.177 | 102.874 | 105.703 | 0.00 | 0.00 |
| ATOM | 26377 | O    | ALA | 1754 | 67.697 | 102.021 | 104.984 | 0.00 | 0.00 |
| ATOM | 26378 | N    | TYR | 1755 | 68.277 | 104.135 | 105.355 | 0.00 | 0.00 |
| ATOM | 26379 | H    | TYR | 1755 | 68.715 | 104.748 | 106.028 | 0.00 | 0.00 |
| ATOM | 26380 | CA   | TYR | 1755 | 67.885 | 104.656 | 104.020 | 0.00 | 0.00 |
| ATOM | 26381 | HA   | TYR | 1755 | 66.963 | 104.133 | 103.766 | 0.00 | 0.00 |
| ATOM | 26382 | CB   | TYR | 1755 | 67.721 | 106.143 | 104.230 | 0.00 | 0.00 |
| ATOM | 26383 | HB2  | TYR | 1755 | 66.992 | 106.256 | 105.032 | 0.00 | 0.00 |

|      |       |     |     |      |        |         |         |      |      |
|------|-------|-----|-----|------|--------|---------|---------|------|------|
| ATOM | 26384 | HB3 | TYR | 1755 | 68.747 | 106.461 | 104.412 | 0.00 | 0.00 |
| ATOM | 26385 | CG  | TYR | 1755 | 67.123 | 106.756 | 102.892 | 0.00 | 0.00 |
| ATOM | 26386 | CD1 | TYR | 1755 | 65.761 | 106.770 | 102.703 | 0.00 | 0.00 |
| ATOM | 26387 | HD1 | TYR | 1755 | 65.154 | 106.316 | 103.473 | 0.00 | 0.00 |
| ATOM | 26388 | CE1 | TYR | 1755 | 65.174 | 107.209 | 101.524 | 0.00 | 0.00 |
| ATOM | 26389 | HE1 | TYR | 1755 | 64.159 | 107.089 | 101.174 | 0.00 | 0.00 |
| ATOM | 26390 | CZ  | TYR | 1755 | 66.016 | 107.838 | 100.532 | 0.00 | 0.00 |
| ATOM | 26391 | OH  | TYR | 1755 | 65.477 | 108.203 | 99.295  | 0.00 | 0.00 |
| ATOM | 26392 | HH  | TYR | 1755 | 64.547 | 107.987 | 99.197  | 0.00 | 0.00 |
| ATOM | 26393 | CE2 | TYR | 1755 | 67.433 | 107.849 | 100.751 | 0.00 | 0.00 |
| ATOM | 26394 | HE2 | TYR | 1755 | 68.056 | 108.308 | 99.998  | 0.00 | 0.00 |
| ATOM | 26395 | CD2 | TYR | 1755 | 67.977 | 107.372 | 101.943 | 0.00 | 0.00 |
| ATOM | 26396 | HD2 | TYR | 1755 | 69.041 | 107.448 | 102.108 | 0.00 | 0.00 |
| ATOM | 26397 | C   | TYR | 1755 | 68.957 | 104.347 | 102.972 | 0.00 | 0.00 |
| ATOM | 26398 | O   | TYR | 1755 | 68.550 | 104.003 | 101.899 | 0.00 | 0.00 |
| ATOM | 26399 | N   | ALA | 1756 | 70.221 | 104.244 | 103.273 | 0.00 | 0.00 |
| ATOM | 26400 | H   | ALA | 1756 | 70.428 | 104.381 | 104.252 | 0.00 | 0.00 |
| ATOM | 26401 | CA  | ALA | 1756 | 71.238 | 103.531 | 102.467 | 0.00 | 0.00 |
| ATOM | 26402 | HA  | ALA | 1756 | 71.310 | 104.030 | 101.501 | 0.00 | 0.00 |
| ATOM | 26403 | CB  | ALA | 1756 | 72.574 | 103.700 | 103.161 | 0.00 | 0.00 |
| ATOM | 26404 | HB1 | ALA | 1756 | 72.541 | 102.996 | 103.992 | 0.00 | 0.00 |
| ATOM | 26405 | HB2 | ALA | 1756 | 73.414 | 103.576 | 102.477 | 0.00 | 0.00 |
| ATOM | 26406 | HB3 | ALA | 1756 | 72.629 | 104.728 | 103.518 | 0.00 | 0.00 |
| ATOM | 26407 | C   | ALA | 1756 | 70.974 | 102.036 | 102.049 | 0.00 | 0.00 |
| ATOM | 26408 | O   | ALA | 1756 | 71.441 | 101.519 | 101.011 | 0.00 | 0.00 |
| ATOM | 26409 | N   | ASP | 1757 | 70.302 | 101.334 | 102.982 | 0.00 | 0.00 |

|      |       |     |     |      |        |         |         |      |      |
|------|-------|-----|-----|------|--------|---------|---------|------|------|
| ATOM | 26410 | H   | ASP | 1757 | 70.169 | 101.862 | 103.833 | 0.00 | 0.00 |
| ATOM | 26411 | CA  | ASP | 1757 | 70.099 | 99.933  | 103.090 | 0.00 | 0.00 |
| ATOM | 26412 | HA  | ASP | 1757 | 70.921 | 99.440  | 102.571 | 0.00 | 0.00 |
| ATOM | 26413 | CB  | ASP | 1757 | 70.220 | 99.560  | 104.564 | 0.00 | 0.00 |
| ATOM | 26414 | HB2 | ASP | 1757 | 70.999 | 100.091 | 105.110 | 0.00 | 0.00 |
| ATOM | 26415 | HB3 | ASP | 1757 | 69.294 | 99.756  | 105.104 | 0.00 | 0.00 |
| ATOM | 26416 | CG  | ASP | 1757 | 70.566 | 98.092  | 104.713 | 0.00 | 0.00 |
| ATOM | 26417 | OD1 | ASP | 1757 | 71.625 | 97.774  | 104.051 | 0.00 | 0.00 |
| ATOM | 26418 | OD2 | ASP | 1757 | 69.878 | 97.360  | 105.397 | 0.00 | 0.00 |
| ATOM | 26419 | C   | ASP | 1757 | 68.795 | 99.476  | 102.439 | 0.00 | 0.00 |
| ATOM | 26420 | O   | ASP | 1757 | 68.761 | 98.458  | 101.745 | 0.00 | 0.00 |
| ATOM | 26421 | N   | MET | 1758 | 67.702 | 100.272 | 102.689 | 0.00 | 0.00 |
| ATOM | 26422 | H   | MET | 1758 | 67.752 | 101.074 | 103.301 | 0.00 | 0.00 |
| ATOM | 26423 | CA  | MET | 1758 | 66.460 | 100.038 | 102.074 | 0.00 | 0.00 |
| ATOM | 26424 | HA  | MET | 1758 | 66.148 | 98.994  | 102.105 | 0.00 | 0.00 |
| ATOM | 26425 | CB  | MET | 1758 | 65.332 | 100.644 | 102.945 | 0.00 | 0.00 |
| ATOM | 26426 | HB2 | MET | 1758 | 64.411 | 100.697 | 102.363 | 0.00 | 0.00 |
| ATOM | 26427 | HB3 | MET | 1758 | 65.736 | 101.649 | 103.065 | 0.00 | 0.00 |
| ATOM | 26428 | CG  | MET | 1758 | 65.070 | 99.802  | 104.225 | 0.00 | 0.00 |
| ATOM | 26429 | HG2 | MET | 1758 | 64.252 | 99.119  | 103.994 | 0.00 | 0.00 |
| ATOM | 26430 | HG3 | MET | 1758 | 65.984 | 99.301  | 104.543 | 0.00 | 0.00 |
| ATOM | 26431 | SD  | MET | 1758 | 64.485 | 100.923 | 105.535 | 0.00 | 0.00 |
| ATOM | 26432 | CE  | MET | 1758 | 62.796 | 101.259 | 104.948 | 0.00 | 0.00 |
| ATOM | 26433 | HE1 | MET | 1758 | 62.202 | 101.434 | 105.845 | 0.00 | 0.00 |
| ATOM | 26434 | HE2 | MET | 1758 | 62.785 | 102.150 | 104.320 | 0.00 | 0.00 |
| ATOM | 26435 | HE3 | MET | 1758 | 62.420 | 100.361 | 104.459 | 0.00 | 0.00 |

|      |       |     |     |      |        |         |         |      |      |
|------|-------|-----|-----|------|--------|---------|---------|------|------|
| ATOM | 26436 | C   | MET | 1758 | 66.424 | 100.474 | 100.597 | 0.00 | 0.00 |
| ATOM | 26437 | O   | MET | 1758 | 65.658 | 99.858  | 99.838  | 0.00 | 0.00 |
| ATOM | 26438 | N   | PHE | 1759 | 67.206 | 101.507 | 100.293 | 0.00 | 0.00 |
| ATOM | 26439 | H   | PHE | 1759 | 67.551 | 102.014 | 101.095 | 0.00 | 0.00 |
| ATOM | 26440 | CA  | PHE | 1759 | 67.024 | 102.239 | 99.002  | 0.00 | 0.00 |
| ATOM | 26441 | HA  | PHE | 1759 | 66.428 | 101.548 | 98.406  | 0.00 | 0.00 |
| ATOM | 26442 | CB  | PHE | 1759 | 66.171 | 103.461 | 99.142  | 0.00 | 0.00 |
| ATOM | 26443 | HB2 | PHE | 1759 | 66.764 | 104.285 | 99.539  | 0.00 | 0.00 |
| ATOM | 26444 | HB3 | PHE | 1759 | 65.817 | 103.773 | 98.159  | 0.00 | 0.00 |
| ATOM | 26445 | CG  | PHE | 1759 | 64.950 | 103.262 | 100.033 | 0.00 | 0.00 |
| ATOM | 26446 | CD1 | PHE | 1759 | 64.972 | 103.913 | 101.270 | 0.00 | 0.00 |
| ATOM | 26447 | HD1 | PHE | 1759 | 65.915 | 104.257 | 101.669 | 0.00 | 0.00 |
| ATOM | 26448 | CE1 | PHE | 1759 | 63.816 | 103.969 | 101.995 | 0.00 | 0.00 |
| ATOM | 26449 | HE1 | PHE | 1759 | 63.707 | 104.569 | 102.887 | 0.00 | 0.00 |
| ATOM | 26450 | CZ  | PHE | 1759 | 62.655 | 103.157 | 101.665 | 0.00 | 0.00 |
| ATOM | 26451 | HZ  | PHE | 1759 | 61.739 | 103.172 | 102.238 | 0.00 | 0.00 |
| ATOM | 26452 | CE2 | PHE | 1759 | 62.757 | 102.323 | 100.513 | 0.00 | 0.00 |
| ATOM | 26453 | HE2 | PHE | 1759 | 61.880 | 101.756 | 100.238 | 0.00 | 0.00 |
| ATOM | 26454 | CD2 | PHE | 1759 | 63.807 | 102.505 | 99.631  | 0.00 | 0.00 |
| ATOM | 26455 | HD2 | PHE | 1759 | 63.778 | 102.104 | 98.628  | 0.00 | 0.00 |
| ATOM | 26456 | C   | PHE | 1759 | 68.388 | 102.450 | 98.288  | 0.00 | 0.00 |
| ATOM | 26457 | O   | PHE | 1759 | 68.469 | 103.127 | 97.249  | 0.00 | 0.00 |
| ATOM | 26458 | N   | GLY | 1760 | 69.435 | 101.714 | 98.698  | 0.00 | 0.00 |
| ATOM | 26459 | H   | GLY | 1760 | 69.337 | 101.293 | 99.611  | 0.00 | 0.00 |
| ATOM | 26460 | CA  | GLY | 1760 | 70.711 | 101.620 | 97.984  | 0.00 | 0.00 |
| ATOM | 26461 | HA2 | GLY | 1760 | 71.339 | 100.835 | 98.405  | 0.00 | 0.00 |

|      |       |      |     |      |        |         |         |      |      |
|------|-------|------|-----|------|--------|---------|---------|------|------|
| ATOM | 26462 | HA3  | GLY | 1760 | 70.433 | 101.317 | 96.974  | 0.00 | 0.00 |
| ATOM | 26463 | C    | GLY | 1760 | 71.543 | 102.896 | 98.087  | 0.00 | 0.00 |
| ATOM | 26464 | O    | GLY | 1760 | 71.458 | 103.617 | 99.086  | 0.00 | 0.00 |
| ATOM | 26465 | N    | PRO | 1761 | 72.380 | 103.162 | 97.122  | 0.00 | 0.00 |
| ATOM | 26466 | CD   | PRO | 1761 | 72.641 | 102.320 | 95.989  | 0.00 | 0.00 |
| ATOM | 26467 | HD2  | PRO | 1761 | 73.167 | 101.434 | 96.343  | 0.00 | 0.00 |
| ATOM | 26468 | HD3  | PRO | 1761 | 71.695 | 101.900 | 95.646  | 0.00 | 0.00 |
| ATOM | 26469 | CG   | PRO | 1761 | 73.459 | 103.103 | 94.986  | 0.00 | 0.00 |
| ATOM | 26470 | HG2  | PRO | 1761 | 74.163 | 102.413 | 94.520  | 0.00 | 0.00 |
| ATOM | 26471 | HG3  | PRO | 1761 | 72.996 | 103.679 | 94.185  | 0.00 | 0.00 |
| ATOM | 26472 | CB   | PRO | 1761 | 74.261 | 103.939 | 95.975  | 0.00 | 0.00 |
| ATOM | 26473 | HB2  | PRO | 1761 | 75.081 | 103.321 | 96.341  | 0.00 | 0.00 |
| ATOM | 26474 | HB3  | PRO | 1761 | 74.604 | 104.854 | 95.492  | 0.00 | 0.00 |
| ATOM | 26475 | CA   | PRO | 1761 | 73.355 | 104.201 | 97.188  | 0.00 | 0.00 |
| ATOM | 26476 | HA   | PRO | 1761 | 73.971 | 103.988 | 98.061  | 0.00 | 0.00 |
| ATOM | 26477 | C    | PRO | 1761 | 72.728 | 105.638 | 97.258  | 0.00 | 0.00 |
| ATOM | 26478 | O    | PRO | 1761 | 72.020 | 106.081 | 96.342  | 0.00 | 0.00 |
| ATOM | 26479 | N    | THR | 1762 | 73.218 | 106.473 | 98.142  | 0.00 | 0.00 |
| ATOM | 26480 | H    | THR | 1762 | 73.839 | 105.990 | 98.774  | 0.00 | 0.00 |
| ATOM | 26481 | CA   | THR | 1762 | 72.941 | 107.895 | 98.482  | 0.00 | 0.00 |
| ATOM | 26482 | HA   | THR | 1762 | 71.930 | 108.242 | 98.271  | 0.00 | 0.00 |
| ATOM | 26483 | CB   | THR | 1762 | 72.967 | 108.274 | 100.006 | 0.00 | 0.00 |
| ATOM | 26484 | HB   | THR | 1762 | 73.042 | 109.344 | 100.197 | 0.00 | 0.00 |
| ATOM | 26485 | CG2  | THR | 1762 | 71.827 | 107.688 | 100.800 | 0.00 | 0.00 |
| ATOM | 26486 | 1HG2 | THR | 1762 | 70.938 | 108.224 | 100.468 | 0.00 | 0.00 |
| ATOM | 26487 | 2HG2 | THR | 1762 | 71.667 | 106.631 | 100.587 | 0.00 | 0.00 |

ATOM 26488 3HG2 THR 1762 72.064 107.819 101.856 0.00 0.00  
ATOM 26489 OG1 THR 1762 74.091 107.676 100.622 0.00 0.00  
ATOM 26490 HG1 THR 1762 74.702 108.316 100.994 0.00 0.00  
ATOM 26491 C THR 1762 73.916 108.847 97.678 0.00 0.00  
ATOM 26492 O THR 1762 75.061 108.495 97.287 0.00 0.00  
ATOM 26493 N VAL 1763 73.396 110.011 97.414 0.00 0.00  
ATOM 26494 H VAL 1763 72.471 110.267 97.727 0.00 0.00  
ATOM 26495 CA VAL 1763 74.294 111.112 96.962 0.00 0.00  
ATOM 26496 HA VAL 1763 74.693 110.790 96.001 0.00 0.00  
ATOM 26497 CB VAL 1763 73.534 112.403 96.403 0.00 0.00  
ATOM 26498 HB VAL 1763 72.796 111.981 95.721 0.00 0.00  
ATOM 26499 CG1 VAL 1763 72.671 113.173 97.339 0.00 0.00  
ATOM 26500 1HG1 VAL 1763 73.256 113.575 98.166 0.00 0.00  
ATOM 26501 2HG1 VAL 1763 72.214 114.062 96.905 0.00 0.00  
ATOM 26502 3HG1 VAL 1763 71.894 112.596 97.840 0.00 0.00  
ATOM 26503 CG2 VAL 1763 74.408 113.325 95.503 0.00 0.00  
ATOM 26504 1HG2 VAL 1763 75.082 112.785 94.839 0.00 0.00  
ATOM 26505 2HG2 VAL 1763 73.666 113.962 95.021 0.00 0.00  
ATOM 26506 3HG2 VAL 1763 75.094 113.865 96.156 0.00 0.00  
ATOM 26507 C VAL 1763 75.481 111.462 97.961 0.00 0.00  
ATOM 26508 O VAL 1763 75.254 111.362 99.177 0.00 0.00  
ATOM 26509 N GLY 1764 76.641 111.872 97.393 0.00 0.00  
ATOM 26510 H GLY 1764 76.715 111.865 96.386 0.00 0.00  
ATOM 26511 CA GLY 1764 77.724 112.319 98.191 0.00 0.00  
ATOM 26512 HA2 GLY 1764 78.431 113.027 97.759 0.00 0.00  
ATOM 26513 HA3 GLY 1764 77.289 112.823 99.054 0.00 0.00

|      |       |     |     |      |        |         |         |      |      |
|------|-------|-----|-----|------|--------|---------|---------|------|------|
| ATOM | 26514 | C   | GLY | 1764 | 78.548 | 111.214 | 98.841  | 0.00 | 0.00 |
| ATOM | 26515 | O   | GLY | 1764 | 79.364 | 111.377 | 99.716  | 0.00 | 0.00 |
| ATOM | 26516 | N   | ASP | 1765 | 78.239 | 109.932 | 98.432  | 0.00 | 0.00 |
| ATOM | 26517 | H   | ASP | 1765 | 77.710 | 109.787 | 97.583  | 0.00 | 0.00 |
| ATOM | 26518 | CA  | ASP | 1765 | 78.683 | 108.670 | 99.090  | 0.00 | 0.00 |
| ATOM | 26519 | HA  | ASP | 1765 | 79.622 | 108.902 | 99.593  | 0.00 | 0.00 |
| ATOM | 26520 | CB  | ASP | 1765 | 77.645 | 108.138 | 100.038 | 0.00 | 0.00 |
| ATOM | 26521 | HB2 | ASP | 1765 | 76.663 | 107.969 | 99.597  | 0.00 | 0.00 |
| ATOM | 26522 | HB3 | ASP | 1765 | 78.004 | 107.156 | 100.347 | 0.00 | 0.00 |
| ATOM | 26523 | CG  | ASP | 1765 | 77.409 | 109.034 | 101.272 | 0.00 | 0.00 |
| ATOM | 26524 | OD1 | ASP | 1765 | 78.278 | 109.308 | 102.118 | 0.00 | 0.00 |
| ATOM | 26525 | OD2 | ASP | 1765 | 76.171 | 109.399 | 101.476 | 0.00 | 0.00 |
| ATOM | 26526 | C   | ASP | 1765 | 79.108 | 107.666 | 98.090  | 0.00 | 0.00 |
| ATOM | 26527 | O   | ASP | 1765 | 78.729 | 107.704 | 96.910  | 0.00 | 0.00 |
| ATOM | 26528 | N   | LYS | 1766 | 79.928 | 106.690 | 98.536  | 0.00 | 0.00 |
| ATOM | 26529 | H   | LYS | 1766 | 79.962 | 106.587 | 99.541  | 0.00 | 0.00 |
| ATOM | 26530 | CA  | LYS | 1766 | 80.877 | 105.952 | 97.713  | 0.00 | 0.00 |
| ATOM | 26531 | HA  | LYS | 1766 | 80.570 | 106.247 | 96.709  | 0.00 | 0.00 |
| ATOM | 26532 | CB  | LYS | 1766 | 82.343 | 106.281 | 98.038  | 0.00 | 0.00 |
| ATOM | 26533 | HB2 | LYS | 1766 | 82.489 | 106.092 | 99.102  | 0.00 | 0.00 |
| ATOM | 26534 | HB3 | LYS | 1766 | 83.122 | 105.669 | 97.583  | 0.00 | 0.00 |
| ATOM | 26535 | CG  | LYS | 1766 | 82.825 | 107.766 | 97.766  | 0.00 | 0.00 |
| ATOM | 26536 | HG2 | LYS | 1766 | 82.350 | 108.081 | 96.837  | 0.00 | 0.00 |
| ATOM | 26537 | HG3 | LYS | 1766 | 82.491 | 108.478 | 98.520  | 0.00 | 0.00 |
| ATOM | 26538 | CD  | LYS | 1766 | 84.320 | 107.890 | 97.711  | 0.00 | 0.00 |
| ATOM | 26539 | HD2 | LYS | 1766 | 84.840 | 107.331 | 98.490  | 0.00 | 0.00 |



|      |       |      |     |      |        |         |        |      |      |
|------|-------|------|-----|------|--------|---------|--------|------|------|
| ATOM | 26540 | HD3  | LYS | 1766 | 84.659 | 107.530 | 96.740 | 0.00 | 0.00 |
| ATOM | 26541 | CE   | LYS | 1766 | 84.763 | 109.367 | 97.754 | 0.00 | 0.00 |
| ATOM | 26542 | HE2  | LYS | 1766 | 85.235 | 109.610 | 96.801 | 0.00 | 0.00 |
| ATOM | 26543 | HE3  | LYS | 1766 | 83.885 | 110.007 | 97.835 | 0.00 | 0.00 |
| ATOM | 26544 | NZ   | LYS | 1766 | 85.762 | 109.612 | 98.776 | 0.00 | 0.00 |
| ATOM | 26545 | HZ1  | LYS | 1766 | 86.199 | 110.517 | 98.674 | 0.00 | 0.00 |
| ATOM | 26546 | HZ2  | LYS | 1766 | 85.400 | 109.558 | 99.717 | 0.00 | 0.00 |
| ATOM | 26547 | HZ3  | LYS | 1766 | 86.542 | 108.979 | 98.675 | 0.00 | 0.00 |
| ATOM | 26548 | C    | LYS | 1766 | 80.702 | 104.441 | 97.709 | 0.00 | 0.00 |
| ATOM | 26549 | O    | LYS | 1766 | 80.159 | 103.912 | 98.677 | 0.00 | 0.00 |
| ATOM | 26550 | N    | VAL | 1767 | 81.110 | 103.758 | 96.651 | 0.00 | 0.00 |
| ATOM | 26551 | H    | VAL | 1767 | 81.563 | 104.312 | 95.938 | 0.00 | 0.00 |
| ATOM | 26552 | CA   | VAL | 1767 | 81.194 | 102.284 | 96.645 | 0.00 | 0.00 |
| ATOM | 26553 | HA   | VAL | 1767 | 81.285 | 102.075 | 97.710 | 0.00 | 0.00 |
| ATOM | 26554 | CB   | VAL | 1767 | 79.921 | 101.593 | 96.168 | 0.00 | 0.00 |
| ATOM | 26555 | HB   | VAL | 1767 | 78.939 | 101.923 | 96.506 | 0.00 | 0.00 |
| ATOM | 26556 | CG1  | VAL | 1767 | 79.738 | 101.643 | 94.644 | 0.00 | 0.00 |
| ATOM | 26557 | 1HG1 | VAL | 1767 | 78.667 | 101.539 | 94.471 | 0.00 | 0.00 |
| ATOM | 26558 | 2HG1 | VAL | 1767 | 80.041 | 102.608 | 94.237 | 0.00 | 0.00 |
| ATOM | 26559 | 3HG1 | VAL | 1767 | 80.234 | 100.842 | 94.096 | 0.00 | 0.00 |
| ATOM | 26560 | CG2  | VAL | 1767 | 79.964 | 100.104 | 96.546 | 0.00 | 0.00 |
| ATOM | 26561 | 1HG2 | VAL | 1767 | 79.112 | 99.567  | 96.129 | 0.00 | 0.00 |
| ATOM | 26562 | 2HG2 | VAL | 1767 | 80.892 | 99.560  | 96.369 | 0.00 | 0.00 |
| ATOM | 26563 | 3HG2 | VAL | 1767 | 79.864 | 100.002 | 97.627 | 0.00 | 0.00 |
| ATOM | 26564 | C    | VAL | 1767 | 82.408 | 101.788 | 95.933 | 0.00 | 0.00 |
| ATOM | 26565 | O    | VAL | 1767 | 82.925 | 102.457 | 95.036 | 0.00 | 0.00 |

|      |       |      |     |      |        |         |        |      |      |
|------|-------|------|-----|------|--------|---------|--------|------|------|
| ATOM | 26566 | N    | ARG | 1768 | 83.062 | 100.731 | 96.439 | 0.00 | 0.00 |
| ATOM | 26567 | H    | ARG | 1768 | 82.723 | 100.255 | 97.263 | 0.00 | 0.00 |
| ATOM | 26568 | CA   | ARG | 1768 | 84.220 | 100.095 | 95.795 | 0.00 | 0.00 |
| ATOM | 26569 | HA   | ARG | 1768 | 84.885 | 100.841 | 95.359 | 0.00 | 0.00 |
| ATOM | 26570 | CB   | ARG | 1768 | 85.014 | 99.381  | 96.960 | 0.00 | 0.00 |
| ATOM | 26571 | HB2  | ARG | 1768 | 85.297 | 100.138 | 97.690 | 0.00 | 0.00 |
| ATOM | 26572 | HB3  | ARG | 1768 | 84.341 | 98.691  | 97.469 | 0.00 | 0.00 |
| ATOM | 26573 | CG   | ARG | 1768 | 86.254 | 98.579  | 96.553 | 0.00 | 0.00 |
| ATOM | 26574 | HG2  | ARG | 1768 | 86.027 | 97.760  | 95.871 | 0.00 | 0.00 |
| ATOM | 26575 | HG3  | ARG | 1768 | 86.887 | 99.303  | 96.041 | 0.00 | 0.00 |
| ATOM | 26576 | CD   | ARG | 1768 | 86.959 | 98.117  | 97.789 | 0.00 | 0.00 |
| ATOM | 26577 | HD2  | ARG | 1768 | 86.336 | 97.377  | 98.291 | 0.00 | 0.00 |
| ATOM | 26578 | HD3  | ARG | 1768 | 87.310 | 98.950  | 98.398 | 0.00 | 0.00 |
| ATOM | 26579 | NE   | ARG | 1768 | 88.231 | 97.456  | 97.409 | 0.00 | 0.00 |
| ATOM | 26580 | HE   | ARG | 1768 | 88.592 | 97.814  | 96.537 | 0.00 | 0.00 |
| ATOM | 26581 | CZ   | ARG | 1768 | 88.776 | 96.412  | 97.931 | 0.00 | 0.00 |
| ATOM | 26582 | NH1  | ARG | 1768 | 88.277 | 95.767  | 98.902 | 0.00 | 0.00 |
| ATOM | 26583 | 1HH1 | ARG | 1768 | 88.740 | 94.918  | 99.192 | 0.00 | 0.00 |
| ATOM | 26584 | 2HH1 | ARG | 1768 | 87.323 | 96.015  | 99.125 | 0.00 | 0.00 |
| ATOM | 26585 | NH2  | ARG | 1768 | 89.817 | 95.926  | 97.432 | 0.00 | 0.00 |
| ATOM | 26586 | 1HH2 | ARG | 1768 | 90.267 | 95.113  | 97.828 | 0.00 | 0.00 |
| ATOM | 26587 | 2HH2 | ARG | 1768 | 90.469 | 96.515  | 96.934 | 0.00 | 0.00 |
| ATOM | 26588 | C    | ARG | 1768 | 83.835 | 99.198  | 94.639 | 0.00 | 0.00 |
| ATOM | 26589 | O    | ARG | 1768 | 82.711 | 98.693  | 94.472 | 0.00 | 0.00 |
| ATOM | 26590 | N    | LEU | 1769 | 84.808 | 98.790  | 93.812 | 0.00 | 0.00 |
| ATOM | 26591 | H    | LEU | 1769 | 85.781 | 99.038  | 93.923 | 0.00 | 0.00 |

|            |      |     |      |        |         |        |      |      |
|------------|------|-----|------|--------|---------|--------|------|------|
| ATOM 26592 | CA   | LEU | 1769 | 84.644 | 98.025  | 92.536 | 0.00 | 0.00 |
| ATOM 26593 | HA   | LEU | 1769 | 83.605 | 97.733  | 92.388 | 0.00 | 0.00 |
| ATOM 26594 | CB   | LEU | 1769 | 84.972 | 98.941  | 91.294 | 0.00 | 0.00 |
| ATOM 26595 | HB2  | LEU | 1769 | 85.952 | 99.386  | 91.462 | 0.00 | 0.00 |
| ATOM 26596 | HB3  | LEU | 1769 | 84.809 | 98.413  | 90.354 | 0.00 | 0.00 |
| ATOM 26597 | CG   | LEU | 1769 | 83.909 | 100.074 | 91.204 | 0.00 | 0.00 |
| ATOM 26598 | HG   | LEU | 1769 | 83.632 | 100.458 | 92.186 | 0.00 | 0.00 |
| ATOM 26599 | CD1  | LEU | 1769 | 84.435 | 101.165 | 90.309 | 0.00 | 0.00 |
| ATOM 26600 | 1HD1 | LEU | 1769 | 84.052 | 102.173 | 90.468 | 0.00 | 0.00 |
| ATOM 26601 | 2HD1 | LEU | 1769 | 85.502 | 101.133 | 90.087 | 0.00 | 0.00 |
| ATOM 26602 | 3HD1 | LEU | 1769 | 84.146 | 100.974 | 89.275 | 0.00 | 0.00 |
| ATOM 26603 | CD2  | LEU | 1769 | 82.536 | 99.722  | 90.516 | 0.00 | 0.00 |
| ATOM 26604 | 1HD2 | LEU | 1769 | 81.978 | 99.165  | 91.269 | 0.00 | 0.00 |
| ATOM 26605 | 2HD2 | LEU | 1769 | 81.993 | 100.632 | 90.261 | 0.00 | 0.00 |
| ATOM 26606 | 3HD2 | LEU | 1769 | 82.649 | 99.116  | 89.617 | 0.00 | 0.00 |
| ATOM 26607 | C    | LEU | 1769 | 85.467 | 96.768  | 92.631 | 0.00 | 0.00 |
| ATOM 26608 | O    | LEU | 1769 | 86.673 | 96.872  | 92.616 | 0.00 | 0.00 |
| ATOM 26609 | N    | ALA | 1770 | 84.820 | 95.599  | 92.870 | 0.00 | 0.00 |
| ATOM 26610 | H    | ALA | 1770 | 83.811 | 95.570  | 92.901 | 0.00 | 0.00 |
| ATOM 26611 | CA   | ALA | 1770 | 85.471 | 94.363  | 93.092 | 0.00 | 0.00 |
| ATOM 26612 | HA   | ALA | 1770 | 84.714 | 93.702  | 93.516 | 0.00 | 0.00 |
| ATOM 26613 | CB   | ALA | 1770 | 85.883 | 93.826  | 91.691 | 0.00 | 0.00 |
| ATOM 26614 | HB1  | ALA | 1770 | 85.086 | 94.038  | 90.978 | 0.00 | 0.00 |
| ATOM 26615 | HB2  | ALA | 1770 | 86.763 | 94.393  | 91.387 | 0.00 | 0.00 |
| ATOM 26616 | HB3  | ALA | 1770 | 86.166 | 92.779  | 91.798 | 0.00 | 0.00 |
| ATOM 26617 | C    | ALA | 1770 | 86.642 | 94.424  | 94.195 | 0.00 | 0.00 |

|      |       |      |     |      |        |        |        |      |      |
|------|-------|------|-----|------|--------|--------|--------|------|------|
| ATOM | 26618 | O    | ALA | 1770 | 86.504 | 95.116 | 95.201 | 0.00 | 0.00 |
| ATOM | 26619 | N    | ASP | 1771 | 87.696 | 93.626 | 93.938 | 0.00 | 0.00 |
| ATOM | 26620 | H    | ASP | 1771 | 87.770 | 93.156 | 93.047 | 0.00 | 0.00 |
| ATOM | 26621 | CA   | ASP | 1771 | 88.904 | 93.650 | 94.796 | 0.00 | 0.00 |
| ATOM | 26622 | HA   | ASP | 1771 | 88.528 | 93.970 | 95.768 | 0.00 | 0.00 |
| ATOM | 26623 | CB   | ASP | 1771 | 89.381 | 92.150 | 94.888 | 0.00 | 0.00 |
| ATOM | 26624 | HB2  | ASP | 1771 | 90.034 | 92.208 | 95.759 | 0.00 | 0.00 |
| ATOM | 26625 | HB3  | ASP | 1771 | 88.543 | 91.491 | 95.112 | 0.00 | 0.00 |
| ATOM | 26626 | CG   | ASP | 1771 | 90.056 | 91.581 | 93.713 | 0.00 | 0.00 |
| ATOM | 26627 | OD1  | ASP | 1771 | 89.615 | 91.886 | 92.560 | 0.00 | 0.00 |
| ATOM | 26628 | OD2  | ASP | 1771 | 91.029 | 90.775 | 93.871 | 0.00 | 0.00 |
| ATOM | 26629 | C    | ASP | 1771 | 89.936 | 94.714 | 94.441 | 0.00 | 0.00 |
| ATOM | 26630 | O    | ASP | 1771 | 91.065 | 94.568 | 94.808 | 0.00 | 0.00 |
| ATOM | 26631 | N    | THR | 1772 | 89.559 | 95.736 | 93.674 | 0.00 | 0.00 |
| ATOM | 26632 | H    | THR | 1772 | 88.554 | 95.831 | 93.637 | 0.00 | 0.00 |
| ATOM | 26633 | CA   | THR | 1772 | 90.403 | 96.959 | 93.249 | 0.00 | 0.00 |
| ATOM | 26634 | HA   | THR | 1772 | 91.427 | 96.650 | 93.040 | 0.00 | 0.00 |
| ATOM | 26635 | CB   | THR | 1772 | 89.841 | 97.606 | 91.937 | 0.00 | 0.00 |
| ATOM | 26636 | HB   | THR | 1772 | 90.648 | 98.192 | 91.497 | 0.00 | 0.00 |
| ATOM | 26637 | CG2  | THR | 1772 | 89.450 | 96.611 | 90.836 | 0.00 | 0.00 |
| ATOM | 26638 | 1HG2 | THR | 1772 | 90.241 | 95.898 | 90.604 | 0.00 | 0.00 |
| ATOM | 26639 | 2HG2 | THR | 1772 | 88.575 | 95.989 | 91.019 | 0.00 | 0.00 |
| ATOM | 26640 | 3HG2 | THR | 1772 | 89.122 | 97.158 | 89.953 | 0.00 | 0.00 |
| ATOM | 26641 | OG1  | THR | 1772 | 88.747 | 98.393 | 92.139 | 0.00 | 0.00 |
| ATOM | 26642 | HG1  | THR | 1772 | 87.939 | 97.887 | 92.249 | 0.00 | 0.00 |
| ATOM | 26643 | C    | THR | 1772 | 90.498 | 98.036 | 94.267 | 0.00 | 0.00 |

|      |       |     |     |      |        |         |        |      |      |
|------|-------|-----|-----|------|--------|---------|--------|------|------|
| ATOM | 26644 | O   | THR | 1772 | 89.838 | 98.069  | 95.291 | 0.00 | 0.00 |
| ATOM | 26645 | N   | GLU | 1773 | 91.394 | 98.957  | 93.985 | 0.00 | 0.00 |
| ATOM | 26646 | H   | GLU | 1773 | 92.094 | 98.776  | 93.279 | 0.00 | 0.00 |
| ATOM | 26647 | CA  | GLU | 1773 | 91.599 | 100.188 | 94.664 | 0.00 | 0.00 |
| ATOM | 26648 | HA  | GLU | 1773 | 91.455 | 100.092 | 95.740 | 0.00 | 0.00 |
| ATOM | 26649 | CB  | GLU | 1773 | 93.065 | 100.645 | 94.571 | 0.00 | 0.00 |
| ATOM | 26650 | HB2 | GLU | 1773 | 93.345 | 100.444 | 93.537 | 0.00 | 0.00 |
| ATOM | 26651 | HB3 | GLU | 1773 | 93.328 | 101.681 | 94.787 | 0.00 | 0.00 |
| ATOM | 26652 | CG  | GLU | 1773 | 94.024 | 99.768  | 95.483 | 0.00 | 0.00 |
| ATOM | 26653 | HG2 | GLU | 1773 | 93.849 | 98.700  | 95.353 | 0.00 | 0.00 |
| ATOM | 26654 | HG3 | GLU | 1773 | 95.064 | 99.840  | 95.163 | 0.00 | 0.00 |
| ATOM | 26655 | CD  | GLU | 1773 | 93.890 | 100.279 | 96.935 | 0.00 | 0.00 |
| ATOM | 26656 | OE1 | GLU | 1773 | 93.098 | 99.662  | 97.684 | 0.00 | 0.00 |
| ATOM | 26657 | OE2 | GLU | 1773 | 94.638 | 101.228 | 97.370 | 0.00 | 0.00 |
| ATOM | 26658 | C   | GLU | 1773 | 90.593 | 101.298 | 94.162 | 0.00 | 0.00 |
| ATOM | 26659 | O   | GLU | 1773 | 90.727 | 102.483 | 94.487 | 0.00 | 0.00 |
| ATOM | 26660 | N   | LEU | 1774 | 89.579 | 100.954 | 93.346 | 0.00 | 0.00 |
| ATOM | 26661 | H   | LEU | 1774 | 89.506 | 100.033 | 92.939 | 0.00 | 0.00 |
| ATOM | 26662 | CA  | LEU | 1774 | 88.659 | 101.944 | 92.797 | 0.00 | 0.00 |
| ATOM | 26663 | HA  | LEU | 1774 | 89.226 | 102.873 | 92.755 | 0.00 | 0.00 |
| ATOM | 26664 | CB  | LEU | 1774 | 88.329 | 101.493 | 91.355 | 0.00 | 0.00 |
| ATOM | 26665 | HB2 | LEU | 1774 | 87.842 | 100.531 | 91.518 | 0.00 | 0.00 |
| ATOM | 26666 | HB3 | LEU | 1774 | 87.619 | 102.157 | 90.862 | 0.00 | 0.00 |
| ATOM | 26667 | CG  | LEU | 1774 | 89.551 | 101.341 | 90.375 | 0.00 | 0.00 |
| ATOM | 26668 | HG  | LEU | 1774 | 90.292 | 100.676 | 90.817 | 0.00 | 0.00 |
| ATOM | 26669 | CD1 | LEU | 1774 | 89.030 | 100.665 | 89.057 | 0.00 | 0.00 |

|      |       |      |     |      |        |         |         |      |      |
|------|-------|------|-----|------|--------|---------|---------|------|------|
| ATOM | 26670 | 1HD1 | LEU | 1774 | 88.211 | 101.060 | 88.456  | 0.00 | 0.00 |
| ATOM | 26671 | 2HD1 | LEU | 1774 | 89.899 | 100.515 | 88.416  | 0.00 | 0.00 |
| ATOM | 26672 | 3HD1 | LEU | 1774 | 88.510 | 99.733  | 89.279  | 0.00 | 0.00 |
| ATOM | 26673 | CD2  | LEU | 1774 | 90.362 | 102.570 | 89.969  | 0.00 | 0.00 |
| ATOM | 26674 | 1HD2 | LEU | 1774 | 89.835 | 103.303 | 89.357  | 0.00 | 0.00 |
| ATOM | 26675 | 2HD2 | LEU | 1774 | 90.790 | 102.985 | 90.881  | 0.00 | 0.00 |
| ATOM | 26676 | 3HD2 | LEU | 1774 | 91.193 | 102.131 | 89.417  | 0.00 | 0.00 |
| ATOM | 26677 | C    | LEU | 1774 | 87.373 | 102.151 | 93.543  | 0.00 | 0.00 |
| ATOM | 26678 | O    | LEU | 1774 | 86.688 | 101.159 | 93.902  | 0.00 | 0.00 |
| ATOM | 26679 | N    | TRP | 1775 | 87.186 | 103.400 | 93.897  | 0.00 | 0.00 |
| ATOM | 26680 | H    | TRP | 1775 | 87.908 | 104.029 | 93.574  | 0.00 | 0.00 |
| ATOM | 26681 | CA   | TRP | 1775 | 85.999 | 103.913 | 94.596  | 0.00 | 0.00 |
| ATOM | 26682 | HA   | TRP | 1775 | 85.352 | 103.085 | 94.886  | 0.00 | 0.00 |
| ATOM | 26683 | CB   | TRP | 1775 | 86.362 | 104.533 | 95.953  | 0.00 | 0.00 |
| ATOM | 26684 | HB2  | TRP | 1775 | 87.024 | 105.386 | 95.805  | 0.00 | 0.00 |
| ATOM | 26685 | HB3  | TRP | 1775 | 85.504 | 105.146 | 96.227  | 0.00 | 0.00 |
| ATOM | 26686 | CG   | TRP | 1775 | 86.920 | 103.795 | 97.177  | 0.00 | 0.00 |
| ATOM | 26687 | CD1  | TRP | 1775 | 88.151 | 103.780 | 97.597  | 0.00 | 0.00 |
| ATOM | 26688 | HD1  | TRP | 1775 | 88.921 | 104.174 | 96.950  | 0.00 | 0.00 |
| ATOM | 26689 | NE1  | TRP | 1775 | 88.340 | 103.037 | 98.758  | 0.00 | 0.00 |
| ATOM | 26690 | HE1  | TRP | 1775 | 89.237 | 102.962 | 99.216  | 0.00 | 0.00 |
| ATOM | 26691 | CE2  | TRP | 1775 | 87.134 | 102.574 | 99.217  | 0.00 | 0.00 |
| ATOM | 26692 | CZ2  | TRP | 1775 | 86.756 | 101.831 | 100.320 | 0.00 | 0.00 |
| ATOM | 26693 | HZ2  | TRP | 1775 | 87.502 | 101.466 | 101.011 | 0.00 | 0.00 |
| ATOM | 26694 | CH2  | TRP | 1775 | 85.367 | 101.573 | 100.541 | 0.00 | 0.00 |
| ATOM | 26695 | HH2  | TRP | 1775 | 85.009 | 101.026 | 101.401 | 0.00 | 0.00 |

|      |       |      |     |      |        |         |        |      |      |
|------|-------|------|-----|------|--------|---------|--------|------|------|
| ATOM | 26696 | CZ3  | TRP | 1775 | 84.452 | 102.185 | 99.665 | 0.00 | 0.00 |
| ATOM | 26697 | HZ3  | TRP | 1775 | 83.396 | 102.047 | 99.844 | 0.00 | 0.00 |
| ATOM | 26698 | CE3  | TRP | 1775 | 84.828 | 102.976 | 98.580 | 0.00 | 0.00 |
| ATOM | 26699 | HE3  | TRP | 1775 | 84.120 | 103.336 | 97.848 | 0.00 | 0.00 |
| ATOM | 26700 | CD2  | TRP | 1775 | 86.185 | 103.122 | 98.284 | 0.00 | 0.00 |
| ATOM | 26701 | C    | TRP | 1775 | 85.293 | 105.027 | 93.831 | 0.00 | 0.00 |
| ATOM | 26702 | O    | TRP | 1775 | 85.864 | 106.053 | 93.630 | 0.00 | 0.00 |
| ATOM | 26703 | N    | ILE | 1776 | 84.017 | 104.813 | 93.395 | 0.00 | 0.00 |
| ATOM | 26704 | H    | ILE | 1776 | 83.575 | 103.932 | 93.614 | 0.00 | 0.00 |
| ATOM | 26705 | CA   | ILE | 1776 | 83.157 | 105.831 | 92.626 | 0.00 | 0.00 |
| ATOM | 26706 | HA   | ILE | 1776 | 83.785 | 106.602 | 92.181 | 0.00 | 0.00 |
| ATOM | 26707 | CB   | ILE | 1776 | 82.386 | 105.245 | 91.470 | 0.00 | 0.00 |
| ATOM | 26708 | HB   | ILE | 1776 | 81.632 | 105.950 | 91.119 | 0.00 | 0.00 |
| ATOM | 26709 | CG2  | ILE | 1776 | 83.375 | 105.083 | 90.335 | 0.00 | 0.00 |
| ATOM | 26710 | 1HG2 | ILE | 1776 | 83.852 | 106.050 | 90.178 | 0.00 | 0.00 |
| ATOM | 26711 | 2HG2 | ILE | 1776 | 84.117 | 104.354 | 90.662 | 0.00 | 0.00 |
| ATOM | 26712 | 3HG2 | ILE | 1776 | 82.904 | 104.781 | 89.399 | 0.00 | 0.00 |
| ATOM | 26713 | CG1  | ILE | 1776 | 81.680 | 103.907 | 91.915 | 0.00 | 0.00 |
| ATOM | 26714 | 2HG1 | ILE | 1776 | 82.490 | 103.177 | 91.922 | 0.00 | 0.00 |
| ATOM | 26715 | 3HG1 | ILE | 1776 | 81.092 | 104.055 | 92.821 | 0.00 | 0.00 |
| ATOM | 26716 | CD1  | ILE | 1776 | 80.720 | 103.653 | 90.766 | 0.00 | 0.00 |
| ATOM | 26717 | 1HD1 | ILE | 1776 | 81.220 | 103.398 | 89.832 | 0.00 | 0.00 |
| ATOM | 26718 | 2HD1 | ILE | 1776 | 80.095 | 102.789 | 90.996 | 0.00 | 0.00 |
| ATOM | 26719 | 3HD1 | ILE | 1776 | 80.007 | 104.470 | 90.654 | 0.00 | 0.00 |
| ATOM | 26720 | C    | ILE | 1776 | 82.246 | 106.570 | 93.647 | 0.00 | 0.00 |
| ATOM | 26721 | O    | ILE | 1776 | 81.616 | 105.917 | 94.491 | 0.00 | 0.00 |

|      |       |      |     |      |        |         |        |      |      |
|------|-------|------|-----|------|--------|---------|--------|------|------|
| ATOM | 26722 | N    | GLU | 1777 | 82.071 | 107.887 | 93.595 | 0.00 | 0.00 |
| ATOM | 26723 | H    | GLU | 1777 | 82.450 | 108.274 | 92.743 | 0.00 | 0.00 |
| ATOM | 26724 | CA   | GLU | 1777 | 81.059 | 108.634 | 94.438 | 0.00 | 0.00 |
| ATOM | 26725 | HA   | GLU | 1777 | 80.850 | 108.053 | 95.337 | 0.00 | 0.00 |
| ATOM | 26726 | CB   | GLU | 1777 | 81.751 | 109.952 | 94.895 | 0.00 | 0.00 |
| ATOM | 26727 | HB2  | GLU | 1777 | 82.726 | 109.787 | 95.353 | 0.00 | 0.00 |
| ATOM | 26728 | HB3  | GLU | 1777 | 81.932 | 110.540 | 93.996 | 0.00 | 0.00 |
| ATOM | 26729 | CG   | GLU | 1777 | 80.929 | 110.743 | 95.891 | 0.00 | 0.00 |
| ATOM | 26730 | HG2  | GLU | 1777 | 79.945 | 110.995 | 95.494 | 0.00 | 0.00 |
| ATOM | 26731 | HG3  | GLU | 1777 | 80.732 | 110.083 | 96.735 | 0.00 | 0.00 |
| ATOM | 26732 | CD   | GLU | 1777 | 81.547 | 112.021 | 96.325 | 0.00 | 0.00 |
| ATOM | 26733 | OE1  | GLU | 1777 | 82.634 | 111.927 | 96.997 | 0.00 | 0.00 |
| ATOM | 26734 | OE2  | GLU | 1777 | 80.994 | 113.160 | 96.119 | 0.00 | 0.00 |
| ATOM | 26735 | C    | GLU | 1777 | 79.733 | 108.853 | 93.629 | 0.00 | 0.00 |
| ATOM | 26736 | O    | GLU | 1777 | 79.823 | 109.245 | 92.397 | 0.00 | 0.00 |
| ATOM | 26737 | N    | VAL | 1778 | 78.550 | 108.704 | 94.219 | 0.00 | 0.00 |
| ATOM | 26738 | H    | VAL | 1778 | 78.491 | 108.352 | 95.164 | 0.00 | 0.00 |
| ATOM | 26739 | CA   | VAL | 1778 | 77.321 | 109.140 | 93.529 | 0.00 | 0.00 |
| ATOM | 26740 | HA   | VAL | 1778 | 77.250 | 108.683 | 92.542 | 0.00 | 0.00 |
| ATOM | 26741 | CB   | VAL | 1778 | 76.054 | 108.683 | 94.172 | 0.00 | 0.00 |
| ATOM | 26742 | HB   | VAL | 1778 | 76.005 | 109.063 | 95.192 | 0.00 | 0.00 |
| ATOM | 26743 | CG1  | VAL | 1778 | 74.776 | 109.289 | 93.557 | 0.00 | 0.00 |
| ATOM | 26744 | 1HG1 | VAL | 1778 | 74.865 | 110.336 | 93.848 | 0.00 | 0.00 |
| ATOM | 26745 | 2HG1 | VAL | 1778 | 74.783 | 109.074 | 92.488 | 0.00 | 0.00 |
| ATOM | 26746 | 3HG1 | VAL | 1778 | 73.861 | 108.864 | 93.968 | 0.00 | 0.00 |
| ATOM | 26747 | CG2  | VAL | 1778 | 75.924 | 107.136 | 94.265 | 0.00 | 0.00 |



|      |       |      |     |      |        |         |        |      |      |
|------|-------|------|-----|------|--------|---------|--------|------|------|
| ATOM | 26748 | 1HG2 | VAL | 1778 | 75.471 | 106.660 | 93.395 | 0.00 | 0.00 |
| ATOM | 26749 | 2HG2 | VAL | 1778 | 76.860 | 106.623 | 94.486 | 0.00 | 0.00 |
| ATOM | 26750 | 3HG2 | VAL | 1778 | 75.167 | 106.867 | 95.002 | 0.00 | 0.00 |
| ATOM | 26751 | C    | VAL | 1778 | 77.298 | 110.643 | 93.344 | 0.00 | 0.00 |
| ATOM | 26752 | O    | VAL | 1778 | 77.152 | 111.403 | 94.343 | 0.00 | 0.00 |
| ATOM | 26753 | N    | GLU | 1779 | 77.315 | 111.065 | 92.126 | 0.00 | 0.00 |
| ATOM | 26754 | H    | GLU | 1779 | 77.503 | 110.391 | 91.397 | 0.00 | 0.00 |
| ATOM | 26755 | CA   | GLU | 1779 | 77.384 | 112.433 | 91.648 | 0.00 | 0.00 |
| ATOM | 26756 | HA   | GLU | 1779 | 78.094 | 112.960 | 92.286 | 0.00 | 0.00 |
| ATOM | 26757 | CB   | GLU | 1779 | 77.990 | 112.497 | 90.230 | 0.00 | 0.00 |
| ATOM | 26758 | HB2  | GLU | 1779 | 77.390 | 111.862 | 89.577 | 0.00 | 0.00 |
| ATOM | 26759 | HB3  | GLU | 1779 | 77.920 | 113.533 | 89.900 | 0.00 | 0.00 |
| ATOM | 26760 | CG   | GLU | 1779 | 79.430 | 111.884 | 90.106 | 0.00 | 0.00 |
| ATOM | 26761 | HG2  | GLU | 1779 | 80.112 | 112.474 | 90.720 | 0.00 | 0.00 |
| ATOM | 26762 | HG3  | GLU | 1779 | 79.491 | 110.865 | 90.488 | 0.00 | 0.00 |
| ATOM | 26763 | CD   | GLU | 1779 | 79.953 | 111.939 | 88.696 | 0.00 | 0.00 |
| ATOM | 26764 | OE1  | GLU | 1779 | 81.126 | 112.302 | 88.481 | 0.00 | 0.00 |
| ATOM | 26765 | OE2  | GLU | 1779 | 79.200 | 111.692 | 87.752 | 0.00 | 0.00 |
| ATOM | 26766 | C    | GLU | 1779 | 76.021 | 113.174 | 91.886 | 0.00 | 0.00 |
| ATOM | 26767 | O    | GLU | 1779 | 76.008 | 114.345 | 92.334 | 0.00 | 0.00 |
| ATOM | 26768 | N    | ASP | 1780 | 74.964 | 112.467 | 91.517 | 0.00 | 0.00 |
| ATOM | 26769 | H    | ASP | 1780 | 75.150 | 111.505 | 91.272 | 0.00 | 0.00 |
| ATOM | 26770 | CA   | ASP | 1780 | 73.627 | 112.813 | 91.994 | 0.00 | 0.00 |
| ATOM | 26771 | HA   | ASP | 1780 | 73.704 | 113.382 | 92.920 | 0.00 | 0.00 |
| ATOM | 26772 | CB   | ASP | 1780 | 73.101 | 113.762 | 90.943 | 0.00 | 0.00 |
| ATOM | 26773 | HB2  | ASP | 1780 | 72.736 | 113.176 | 90.099 | 0.00 | 0.00 |

|      |       |     |     |      |        |         |        |      |      |
|------|-------|-----|-----|------|--------|---------|--------|------|------|
| ATOM | 26774 | HB3 | ASP | 1780 | 73.897 | 114.446 | 90.648 | 0.00 | 0.00 |
| ATOM | 26775 | CG  | ASP | 1780 | 71.812 | 114.520 | 91.487 | 0.00 | 0.00 |
| ATOM | 26776 | OD1 | ASP | 1780 | 70.854 | 114.708 | 90.645 | 0.00 | 0.00 |
| ATOM | 26777 | OD2 | ASP | 1780 | 71.813 | 114.985 | 92.619 | 0.00 | 0.00 |
| ATOM | 26778 | C   | ASP | 1780 | 72.619 | 111.686 | 92.176 | 0.00 | 0.00 |
| ATOM | 26779 | O   | ASP | 1780 | 72.652 | 110.603 | 91.534 | 0.00 | 0.00 |
| ATOM | 26780 | N   | ASP | 1781 | 71.702 | 111.781 | 93.105 | 0.00 | 0.00 |
| ATOM | 26781 | H   | ASP | 1781 | 71.788 | 112.540 | 93.766 | 0.00 | 0.00 |
| ATOM | 26782 | CA  | ASP | 1781 | 70.559 | 110.831 | 93.327 | 0.00 | 0.00 |
| ATOM | 26783 | HA  | ASP | 1781 | 70.700 | 109.965 | 92.681 | 0.00 | 0.00 |
| ATOM | 26784 | CB  | ASP | 1781 | 70.691 | 110.299 | 94.727 | 0.00 | 0.00 |
| ATOM | 26785 | HB2 | ASP | 1781 | 71.717 | 109.999 | 94.940 | 0.00 | 0.00 |
| ATOM | 26786 | HB3 | ASP | 1781 | 70.526 | 111.235 | 95.260 | 0.00 | 0.00 |
| ATOM | 26787 | CG  | ASP | 1781 | 69.635 | 109.241 | 95.043 | 0.00 | 0.00 |
| ATOM | 26788 | OD1 | ASP | 1781 | 69.345 | 108.969 | 96.230 | 0.00 | 0.00 |
| ATOM | 26789 | OD2 | ASP | 1781 | 69.171 | 108.594 | 94.107 | 0.00 | 0.00 |
| ATOM | 26790 | C   | ASP | 1781 | 69.261 | 111.385 | 92.974 | 0.00 | 0.00 |
| ATOM | 26791 | O   | ASP | 1781 | 68.764 | 112.358 | 93.663 | 0.00 | 0.00 |
| ATOM | 26792 | N   | LEU | 1782 | 68.708 | 110.954 | 91.833 | 0.00 | 0.00 |
| ATOM | 26793 | H   | LEU | 1782 | 69.239 | 110.185 | 91.450 | 0.00 | 0.00 |
| ATOM | 26794 | CA  | LEU | 1782 | 67.514 | 111.474 | 91.240 | 0.00 | 0.00 |
| ATOM | 26795 | HA  | LEU | 1782 | 67.365 | 112.551 | 91.324 | 0.00 | 0.00 |
| ATOM | 26796 | CB  | LEU | 1782 | 67.621 | 111.119 | 89.709 | 0.00 | 0.00 |
| ATOM | 26797 | HB2 | LEU | 1782 | 68.019 | 110.110 | 89.601 | 0.00 | 0.00 |
| ATOM | 26798 | HB3 | LEU | 1782 | 66.563 | 111.002 | 89.473 | 0.00 | 0.00 |
| ATOM | 26799 | CG  | LEU | 1782 | 68.255 | 112.136 | 88.732 | 0.00 | 0.00 |

|            |               |        |         |        |      |      |
|------------|---------------|--------|---------|--------|------|------|
| ATOM 26800 | HG LEU 1782   | 67.884 | 113.102 | 89.077 | 0.00 | 0.00 |
| ATOM 26801 | CD1 LEU 1782  | 69.821 | 112.176 | 88.852 | 0.00 | 0.00 |
| ATOM 26802 | 1HD1 LEU 1782 | 70.133 | 112.406 | 89.871 | 0.00 | 0.00 |
| ATOM 26803 | 2HD1 LEU 1782 | 70.257 | 111.225 | 88.546 | 0.00 | 0.00 |
| ATOM 26804 | 3HD1 LEU 1782 | 70.190 | 112.982 | 88.218 | 0.00 | 0.00 |
| ATOM 26805 | CD2 LEU 1782  | 67.871 | 111.957 | 87.297 | 0.00 | 0.00 |
| ATOM 26806 | 1HD2 LEU 1782 | 68.470 | 112.553 | 86.609 | 0.00 | 0.00 |
| ATOM 26807 | 2HD2 LEU 1782 | 67.979 | 110.932 | 86.941 | 0.00 | 0.00 |
| ATOM 26808 | 3HD2 LEU 1782 | 66.889 | 112.385 | 87.098 | 0.00 | 0.00 |
| ATOM 26809 | C LEU 1782    | 66.398 | 110.708 | 91.993 | 0.00 | 0.00 |
| ATOM 26810 | O LEU 1782    | 65.786 | 109.772 | 91.481 | 0.00 | 0.00 |
| ATOM 26811 | N THR 1783    | 66.312 | 111.054 | 93.298 | 0.00 | 0.00 |
| ATOM 26812 | H THR 1783    | 67.041 | 111.659 | 93.649 | 0.00 | 0.00 |
| ATOM 26813 | CA THR 1783   | 65.251 | 110.568 | 94.245 | 0.00 | 0.00 |
| ATOM 26814 | HA THR 1783   | 64.546 | 109.895 | 93.758 | 0.00 | 0.00 |
| ATOM 26815 | CB THR 1783   | 65.897 | 109.702 | 95.440 | 0.00 | 0.00 |
| ATOM 26816 | HB THR 1783   | 66.624 | 108.969 | 95.090 | 0.00 | 0.00 |
| ATOM 26817 | CG2 THR 1783  | 66.476 | 110.574 | 96.575 | 0.00 | 0.00 |
| ATOM 26818 | 1HG2 THR 1783 | 65.745 | 111.203 | 97.083 | 0.00 | 0.00 |
| ATOM 26819 | 2HG2 THR 1783 | 66.907 | 109.841 | 97.257 | 0.00 | 0.00 |
| ATOM 26820 | 3HG2 THR 1783 | 67.288 | 111.184 | 96.179 | 0.00 | 0.00 |
| ATOM 26821 | OG1 THR 1783  | 64.896 | 109.003 | 96.074 | 0.00 | 0.00 |
| ATOM 26822 | HG1 THR 1783  | 65.308 | 108.494 | 96.776 | 0.00 | 0.00 |
| ATOM 26823 | C THR 1783    | 64.352 | 111.723 | 94.648 | 0.00 | 0.00 |
| ATOM 26824 | O THR 1783    | 64.537 | 112.845 | 94.186 | 0.00 | 0.00 |
| ATOM 26825 | N THR 1784    | 63.405 | 111.467 | 95.535 | 0.00 | 0.00 |

|      |       |      |     |      |        |         |         |      |      |
|------|-------|------|-----|------|--------|---------|---------|------|------|
| ATOM | 26826 | H    | THR | 1784 | 63.236 | 110.487 | 95.711  | 0.00 | 0.00 |
| ATOM | 26827 | CA   | THR | 1784 | 62.402 | 112.444 | 95.967  | 0.00 | 0.00 |
| ATOM | 26828 | HA   | THR | 1784 | 62.724 | 113.431 | 95.633  | 0.00 | 0.00 |
| ATOM | 26829 | CB   | THR | 1784 | 61.011 | 112.143 | 95.517  | 0.00 | 0.00 |
| ATOM | 26830 | HB   | THR | 1784 | 60.555 | 111.372 | 96.138  | 0.00 | 0.00 |
| ATOM | 26831 | CG2  | THR | 1784 | 60.023 | 113.301 | 95.233  | 0.00 | 0.00 |
| ATOM | 26832 | 1HG2 | THR | 1784 | 59.078 | 112.820 | 94.980  | 0.00 | 0.00 |
| ATOM | 26833 | 2HG2 | THR | 1784 | 59.740 | 113.824 | 96.146  | 0.00 | 0.00 |
| ATOM | 26834 | 3HG2 | THR | 1784 | 60.343 | 113.963 | 94.429  | 0.00 | 0.00 |
| ATOM | 26835 | OG1  | THR | 1784 | 61.054 | 111.500 | 94.244  | 0.00 | 0.00 |
| ATOM | 26836 | HG1  | THR | 1784 | 61.377 | 110.604 | 94.366  | 0.00 | 0.00 |
| ATOM | 26837 | C    | THR | 1784 | 62.256 | 112.475 | 97.525  | 0.00 | 0.00 |
| ATOM | 26838 | O    | THR | 1784 | 61.509 | 113.366 | 97.998  | 0.00 | 0.00 |
| ATOM | 26839 | N    | TYR | 1785 | 62.892 | 111.516 | 98.268  | 0.00 | 0.00 |
| ATOM | 26840 | H    | TYR | 1785 | 63.648 | 111.013 | 97.825  | 0.00 | 0.00 |
| ATOM | 26841 | CA   | TYR | 1785 | 62.746 | 111.261 | 99.668  | 0.00 | 0.00 |
| ATOM | 26842 | HA   | TYR | 1785 | 63.236 | 110.325 | 99.935  | 0.00 | 0.00 |
| ATOM | 26843 | CB   | TYR | 1785 | 63.434 | 112.356 | 100.454 | 0.00 | 0.00 |
| ATOM | 26844 | HB2  | TYR | 1785 | 63.009 | 113.323 | 100.184 | 0.00 | 0.00 |
| ATOM | 26845 | HB3  | TYR | 1785 | 63.299 | 112.261 | 101.532 | 0.00 | 0.00 |
| ATOM | 26846 | CG   | TYR | 1785 | 64.904 | 112.474 | 100.124 | 0.00 | 0.00 |
| ATOM | 26847 | CD1  | TYR | 1785 | 65.374 | 113.517 | 99.274  | 0.00 | 0.00 |
| ATOM | 26848 | HD1  | TYR | 1785 | 64.714 | 114.324 | 98.992  | 0.00 | 0.00 |
| ATOM | 26849 | CE1  | TYR | 1785 | 66.690 | 113.442 | 98.758  | 0.00 | 0.00 |
| ATOM | 26850 | HE1  | TYR | 1785 | 66.991 | 114.205 | 98.055  | 0.00 | 0.00 |
| ATOM | 26851 | CZ   | TYR | 1785 | 67.613 | 112.450 | 99.176  | 0.00 | 0.00 |

|      |       |     |     |      |        |         |         |      |      |
|------|-------|-----|-----|------|--------|---------|---------|------|------|
| ATOM | 26852 | OH  | TYR | 1785 | 68.883 | 112.358 | 98.657  | 0.00 | 0.00 |
| ATOM | 26853 | HH  | TYR | 1785 | 68.998 | 112.943 | 97.905  | 0.00 | 0.00 |
| ATOM | 26854 | CE2 | TYR | 1785 | 67.126 | 111.454 | 99.987  | 0.00 | 0.00 |
| ATOM | 26855 | HE2 | TYR | 1785 | 67.873 | 110.717 | 100.242 | 0.00 | 0.00 |
| ATOM | 26856 | CD2 | TYR | 1785 | 65.810 | 111.400 | 100.454 | 0.00 | 0.00 |
| ATOM | 26857 | HD2 | TYR | 1785 | 65.408 | 110.592 | 101.047 | 0.00 | 0.00 |
| ATOM | 26858 | C   | TYR | 1785 | 61.248 | 111.074 | 100.153 | 0.00 | 0.00 |
| ATOM | 26859 | O   | TYR | 1785 | 60.726 | 111.813 | 100.934 | 0.00 | 0.00 |
| ATOM | 26860 | N   | GLY | 1786 | 60.517 | 110.050 | 99.660  | 0.00 | 0.00 |
| ATOM | 26861 | H   | GLY | 1786 | 61.106 | 109.512 | 99.041  | 0.00 | 0.00 |
| ATOM | 26862 | CA  | GLY | 1786 | 59.179 | 109.622 | 100.053 | 0.00 | 0.00 |
| ATOM | 26863 | HA2 | GLY | 1786 | 59.245 | 108.930 | 100.893 | 0.00 | 0.00 |
| ATOM | 26864 | HA3 | GLY | 1786 | 58.662 | 110.578 | 100.134 | 0.00 | 0.00 |
| ATOM | 26865 | C   | GLY | 1786 | 58.343 | 108.929 | 99.005  | 0.00 | 0.00 |
| ATOM | 26866 | O   | GLY | 1786 | 57.186 | 108.609 | 99.290  | 0.00 | 0.00 |
| ATOM | 26867 | N   | GLU | 1787 | 58.768 | 108.683 | 97.806  | 0.00 | 0.00 |
| ATOM | 26868 | H   | GLU | 1787 | 59.738 | 108.875 | 97.602  | 0.00 | 0.00 |
| ATOM | 26869 | CA  | GLU | 1787 | 57.916 | 108.245 | 96.694  | 0.00 | 0.00 |
| ATOM | 26870 | HA  | GLU | 1787 | 56.936 | 108.022 | 97.117  | 0.00 | 0.00 |
| ATOM | 26871 | CB  | GLU | 1787 | 57.593 | 109.439 | 95.710  | 0.00 | 0.00 |
| ATOM | 26872 | HB2 | GLU | 1787 | 58.531 | 109.658 | 95.200  | 0.00 | 0.00 |
| ATOM | 26873 | HB3 | GLU | 1787 | 57.098 | 108.937 | 94.879  | 0.00 | 0.00 |
| ATOM | 26874 | CG  | GLU | 1787 | 56.736 | 110.578 | 96.213  | 0.00 | 0.00 |
| ATOM | 26875 | HG2 | GLU | 1787 | 57.263 | 111.070 | 97.030  | 0.00 | 0.00 |
| ATOM | 26876 | HG3 | GLU | 1787 | 56.697 | 111.352 | 95.446  | 0.00 | 0.00 |
| ATOM | 26877 | CD  | GLU | 1787 | 55.287 | 110.172 | 96.589  | 0.00 | 0.00 |

|      |       |     |     |      |        |         |        |      |      |
|------|-------|-----|-----|------|--------|---------|--------|------|------|
| ATOM | 26878 | OE1 | GLU | 1787 | 54.901 | 108.978 | 96.433 | 0.00 | 0.00 |
| ATOM | 26879 | OE2 | GLU | 1787 | 54.475 | 111.042 | 96.939 | 0.00 | 0.00 |
| ATOM | 26880 | C   | GLU | 1787 | 58.446 | 107.007 | 95.973 | 0.00 | 0.00 |
| ATOM | 26881 | O   | GLU | 1787 | 57.913 | 106.576 | 94.982 | 0.00 | 0.00 |
| ATOM | 26882 | N   | GLU | 1788 | 59.489 | 106.539 | 96.577 | 0.00 | 0.00 |
| ATOM | 26883 | H   | GLU | 1788 | 59.784 | 107.083 | 97.376 | 0.00 | 0.00 |
| ATOM | 26884 | CA  | GLU | 1788 | 60.412 | 105.519 | 96.019 | 0.00 | 0.00 |
| ATOM | 26885 | HA  | GLU | 1788 | 60.821 | 105.857 | 95.067 | 0.00 | 0.00 |
| ATOM | 26886 | CB  | GLU | 1788 | 61.664 | 105.260 | 96.982 | 0.00 | 0.00 |
| ATOM | 26887 | HB2 | GLU | 1788 | 61.243 | 105.121 | 97.978 | 0.00 | 0.00 |
| ATOM | 26888 | HB3 | GLU | 1788 | 62.195 | 104.373 | 96.638 | 0.00 | 0.00 |
| ATOM | 26889 | CG  | GLU | 1788 | 62.688 | 106.424 | 97.035 | 0.00 | 0.00 |
| ATOM | 26890 | HG2 | GLU | 1788 | 63.617 | 105.956 | 97.361 | 0.00 | 0.00 |
| ATOM | 26891 | HG3 | GLU | 1788 | 62.831 | 106.771 | 96.011 | 0.00 | 0.00 |
| ATOM | 26892 | CD  | GLU | 1788 | 62.336 | 107.729 | 97.764 | 0.00 | 0.00 |
| ATOM | 26893 | OE1 | GLU | 1788 | 62.898 | 107.935 | 98.875 | 0.00 | 0.00 |
| ATOM | 26894 | OE2 | GLU | 1788 | 61.613 | 108.592 | 97.190 | 0.00 | 0.00 |
| ATOM | 26895 | C   | GLU | 1788 | 59.792 | 104.152 | 95.681 | 0.00 | 0.00 |
| ATOM | 26896 | O   | GLU | 1788 | 59.352 | 103.495 | 96.624 | 0.00 | 0.00 |
| ATOM | 26897 | N   | VAL | 1789 | 59.888 | 103.665 | 94.430 | 0.00 | 0.00 |
| ATOM | 26898 | H   | VAL | 1789 | 60.454 | 104.070 | 93.698 | 0.00 | 0.00 |
| ATOM | 26899 | CA  | VAL | 1789 | 59.138 | 102.394 | 94.049 | 0.00 | 0.00 |
| ATOM | 26900 | HA  | VAL | 1789 | 58.428 | 102.246 | 94.863 | 0.00 | 0.00 |
| ATOM | 26901 | CB  | VAL | 1789 | 58.302 | 102.665 | 92.795 | 0.00 | 0.00 |
| ATOM | 26902 | HB  | VAL | 1789 | 57.818 | 101.793 | 92.356 | 0.00 | 0.00 |
| ATOM | 26903 | CG1 | VAL | 1789 | 57.221 | 103.758 | 92.915 | 0.00 | 0.00 |

|      |       |      |     |      |        |         |        |      |      |
|------|-------|------|-----|------|--------|---------|--------|------|------|
| ATOM | 26904 | 1HG1 | VAL | 1789 | 57.565 | 104.670 | 93.401 | 0.00 | 0.00 |
| ATOM | 26905 | 2HG1 | VAL | 1789 | 56.749 | 103.932 | 91.947 | 0.00 | 0.00 |
| ATOM | 26906 | 3HG1 | VAL | 1789 | 56.447 | 103.377 | 93.581 | 0.00 | 0.00 |
| ATOM | 26907 | CG2  | VAL | 1789 | 59.147 | 103.073 | 91.586 | 0.00 | 0.00 |
| ATOM | 26908 | 1HG2 | VAL | 1789 | 58.543 | 103.042 | 90.679 | 0.00 | 0.00 |
| ATOM | 26909 | 2HG2 | VAL | 1789 | 59.564 | 104.070 | 91.726 | 0.00 | 0.00 |
| ATOM | 26910 | 3HG2 | VAL | 1789 | 60.010 | 102.427 | 91.420 | 0.00 | 0.00 |
| ATOM | 26911 | C    | VAL | 1789 | 59.941 | 101.093 | 93.978 | 0.00 | 0.00 |
| ATOM | 26912 | O    | VAL | 1789 | 61.026 | 100.987 | 93.361 | 0.00 | 0.00 |
| ATOM | 26913 | N    | LYS | 1790 | 59.357 | 100.123 | 94.655 | 0.00 | 0.00 |
| ATOM | 26914 | H    | LYS | 1790 | 58.451 | 100.301 | 95.065 | 0.00 | 0.00 |
| ATOM | 26915 | CA   | LYS | 1790 | 59.858 | 98.746  | 94.830 | 0.00 | 0.00 |
| ATOM | 26916 | HA   | LYS | 1790 | 60.575 | 98.600  | 94.022 | 0.00 | 0.00 |
| ATOM | 26917 | CB   | LYS | 1790 | 60.398 | 98.529  | 96.267 | 0.00 | 0.00 |
| ATOM | 26918 | HB2  | LYS | 1790 | 59.558 | 98.447  | 96.958 | 0.00 | 0.00 |
| ATOM | 26919 | HB3  | LYS | 1790 | 60.818 | 99.517  | 96.457 | 0.00 | 0.00 |
| ATOM | 26920 | CG   | LYS | 1790 | 61.344 | 97.389  | 96.400 | 0.00 | 0.00 |
| ATOM | 26921 | HG2  | LYS | 1790 | 60.926 | 96.459  | 96.015 | 0.00 | 0.00 |
| ATOM | 26922 | HG3  | LYS | 1790 | 62.258 | 97.586  | 95.841 | 0.00 | 0.00 |
| ATOM | 26923 | CD   | LYS | 1790 | 61.928 | 97.261  | 97.855 | 0.00 | 0.00 |
| ATOM | 26924 | HD2  | LYS | 1790 | 61.086 | 97.101  | 98.527 | 0.00 | 0.00 |
| ATOM | 26925 | HD3  | LYS | 1790 | 62.587 | 96.395  | 97.927 | 0.00 | 0.00 |
| ATOM | 26926 | CE   | LYS | 1790 | 62.738 | 98.494  | 98.307 | 0.00 | 0.00 |
| ATOM | 26927 | HE2  | LYS | 1790 | 62.343 | 99.424  | 97.900 | 0.00 | 0.00 |
| ATOM | 26928 | HE3  | LYS | 1790 | 62.852 | 98.523  | 99.391 | 0.00 | 0.00 |
| ATOM | 26929 | NZ   | LYS | 1790 | 64.127 | 98.331  | 97.802 | 0.00 | 0.00 |

|      |       |     |     |      |        |        |        |      |      |
|------|-------|-----|-----|------|--------|--------|--------|------|------|
| ATOM | 26930 | HZ1 | LYS | 1790 | 64.272 | 97.358 | 97.575 | 0.00 | 0.00 |
| ATOM | 26931 | HZ2 | LYS | 1790 | 64.264 | 98.772 | 96.904 | 0.00 | 0.00 |
| ATOM | 26932 | HZ3 | LYS | 1790 | 64.785 | 98.827 | 98.386 | 0.00 | 0.00 |
| ATOM | 26933 | C   | LYS | 1790 | 58.749 | 97.717 | 94.463 | 0.00 | 0.00 |
| ATOM | 26934 | O   | LYS | 1790 | 57.524 | 97.908 | 94.719 | 0.00 | 0.00 |
| ATOM | 26935 | N   | PHE | 1791 | 59.128 | 96.521 | 94.148 | 0.00 | 0.00 |
| ATOM | 26936 | H   | PHE | 1791 | 60.094 | 96.422 | 93.871 | 0.00 | 0.00 |
| ATOM | 26937 | CA  | PHE | 1791 | 58.232 | 95.323 | 94.016 | 0.00 | 0.00 |
| ATOM | 26938 | HA  | PHE | 1791 | 57.206 | 95.607 | 94.252 | 0.00 | 0.00 |
| ATOM | 26939 | CB  | PHE | 1791 | 58.235 | 94.961 | 92.540 | 0.00 | 0.00 |
| ATOM | 26940 | HB2 | PHE | 1791 | 57.874 | 95.828 | 91.986 | 0.00 | 0.00 |
| ATOM | 26941 | HB3 | PHE | 1791 | 59.216 | 94.739 | 92.121 | 0.00 | 0.00 |
| ATOM | 26942 | CG  | PHE | 1791 | 57.482 | 93.797 | 92.148 | 0.00 | 0.00 |
| ATOM | 26943 | CD1 | PHE | 1791 | 56.087 | 93.906 | 91.982 | 0.00 | 0.00 |
| ATOM | 26944 | HD1 | PHE | 1791 | 55.605 | 94.863 | 92.113 | 0.00 | 0.00 |
| ATOM | 26945 | CE1 | PHE | 1791 | 55.325 | 92.807 | 91.699 | 0.00 | 0.00 |
| ATOM | 26946 | HE1 | PHE | 1791 | 54.264 | 93.006 | 91.654 | 0.00 | 0.00 |
| ATOM | 26947 | CZ  | PHE | 1791 | 55.936 | 91.492 | 91.686 | 0.00 | 0.00 |
| ATOM | 26948 | HZ  | PHE | 1791 | 55.279 | 90.649 | 91.530 | 0.00 | 0.00 |
| ATOM | 26949 | CE2 | PHE | 1791 | 57.287 | 91.378 | 92.051 | 0.00 | 0.00 |
| ATOM | 26950 | HE2 | PHE | 1791 | 57.784 | 90.434 | 92.222 | 0.00 | 0.00 |
| ATOM | 26951 | CD2 | PHE | 1791 | 58.065 | 92.511 | 92.237 | 0.00 | 0.00 |
| ATOM | 26952 | HD2 | PHE | 1791 | 59.103 | 92.350 | 92.491 | 0.00 | 0.00 |
| ATOM | 26953 | C   | PHE | 1791 | 58.646 | 94.110 | 94.901 | 0.00 | 0.00 |
| ATOM | 26954 | O   | PHE | 1791 | 59.776 | 93.996 | 95.319 | 0.00 | 0.00 |
| ATOM | 26955 | N   | GLY | 1792 | 57.609 | 93.298 | 95.283 | 0.00 | 0.00 |



|      |       |     |     |      |        |        |         |      |      |
|------|-------|-----|-----|------|--------|--------|---------|------|------|
| ATOM | 26956 | H   | GLY | 1792 | 56.703 | 93.400 | 94.849  | 0.00 | 0.00 |
| ATOM | 26957 | CA  | GLY | 1792 | 57.618 | 92.302 | 96.324  | 0.00 | 0.00 |
| ATOM | 26958 | HA2 | GLY | 1792 | 57.882 | 91.402 | 95.769  | 0.00 | 0.00 |
| ATOM | 26959 | HA3 | GLY | 1792 | 58.524 | 92.374 | 96.926  | 0.00 | 0.00 |
| ATOM | 26960 | C   | GLY | 1792 | 56.365 | 92.164 | 97.077  | 0.00 | 0.00 |
| ATOM | 26961 | O   | GLY | 1792 | 55.523 | 93.061 | 97.023  | 0.00 | 0.00 |
| ATOM | 26962 | N   | GLY | 1793 | 56.321 | 91.205 | 98.003  | 0.00 | 0.00 |
| ATOM | 26963 | H   | GLY | 1793 | 57.172 | 90.702 | 98.210  | 0.00 | 0.00 |
| ATOM | 26964 | CA  | GLY | 1793 | 55.365 | 91.049 | 99.106  | 0.00 | 0.00 |
| ATOM | 26965 | HA2 | GLY | 1793 | 54.396 | 90.899 | 98.630  | 0.00 | 0.00 |
| ATOM | 26966 | HA3 | GLY | 1793 | 55.612 | 90.160 | 99.687  | 0.00 | 0.00 |
| ATOM | 26967 | C   | GLY | 1793 | 55.201 | 92.322 | 99.941  | 0.00 | 0.00 |
| ATOM | 26968 | O   | GLY | 1793 | 56.143 | 92.881 | 100.593 | 0.00 | 0.00 |
| ATOM | 26969 | N   | GLY | 1794 | 53.974 | 92.826 | 99.869  | 0.00 | 0.00 |
| ATOM | 26970 | H   | GLY | 1794 | 53.274 | 92.314 | 99.351  | 0.00 | 0.00 |
| ATOM | 26971 | CA  | GLY | 1794 | 53.603 | 94.070 | 100.474 | 0.00 | 0.00 |
| ATOM | 26972 | HA2 | GLY | 1794 | 52.529 | 94.212 | 100.353 | 0.00 | 0.00 |
| ATOM | 26973 | HA3 | GLY | 1794 | 53.818 | 94.037 | 101.542 | 0.00 | 0.00 |
| ATOM | 26974 | C   | GLY | 1794 | 54.203 | 95.358 | 99.906  | 0.00 | 0.00 |
| ATOM | 26975 | O   | GLY | 1794 | 54.015 | 96.402 | 100.469 | 0.00 | 0.00 |
| ATOM | 26976 | N   | LYS | 1795 | 54.814 | 95.383 | 98.724  | 0.00 | 0.00 |
| ATOM | 26977 | H   | LYS | 1795 | 54.843 | 94.588 | 98.102  | 0.00 | 0.00 |
| ATOM | 26978 | CA  | LYS | 1795 | 55.522 | 96.516 | 98.154  | 0.00 | 0.00 |
| ATOM | 26979 | HA  | LYS | 1795 | 55.478 | 97.188 | 99.012  | 0.00 | 0.00 |
| ATOM | 26980 | CB  | LYS | 1795 | 56.985 | 96.112 | 97.787  | 0.00 | 0.00 |
| ATOM | 26981 | HB2 | LYS | 1795 | 57.003 | 95.591 | 96.829  | 0.00 | 0.00 |

|      |       |      |     |      |        |         |         |      |      |
|------|-------|------|-----|------|--------|---------|---------|------|------|
| ATOM | 26982 | HB3  | LYS | 1795 | 57.583 | 97.009  | 97.627  | 0.00 | 0.00 |
| ATOM | 26983 | CG   | LYS | 1795 | 57.837 | 95.277  | 98.774  | 0.00 | 0.00 |
| ATOM | 26984 | HG2  | LYS | 1795 | 57.458 | 94.281  | 99.002  | 0.00 | 0.00 |
| ATOM | 26985 | HG3  | LYS | 1795 | 58.857 | 95.182  | 98.404  | 0.00 | 0.00 |
| ATOM | 26986 | CD   | LYS | 1795 | 57.880 | 96.103  | 100.116 | 0.00 | 0.00 |
| ATOM | 26987 | HD2  | LYS | 1795 | 58.343 | 97.063  | 99.886  | 0.00 | 0.00 |
| ATOM | 26988 | HD3  | LYS | 1795 | 56.913 | 96.245  | 100.600 | 0.00 | 0.00 |
| ATOM | 26989 | CE   | LYS | 1795 | 58.864 | 95.488  | 101.143 | 0.00 | 0.00 |
| ATOM | 26990 | HE2  | LYS | 1795 | 59.887 | 95.718  | 100.844 | 0.00 | 0.00 |
| ATOM | 26991 | HE3  | LYS | 1795 | 58.783 | 95.997  | 102.104 | 0.00 | 0.00 |
| ATOM | 26992 | NZ   | LYS | 1795 | 58.559 | 94.013  | 101.352 | 0.00 | 0.00 |
| ATOM | 26993 | HZ1  | LYS | 1795 | 57.698 | 93.968  | 101.879 | 0.00 | 0.00 |
| ATOM | 26994 | HZ2  | LYS | 1795 | 58.526 | 93.542  | 100.460 | 0.00 | 0.00 |
| ATOM | 26995 | HZ3  | LYS | 1795 | 59.120 | 93.578  | 102.071 | 0.00 | 0.00 |
| ATOM | 26996 | C    | LYS | 1795 | 54.730 | 97.493  | 97.210  | 0.00 | 0.00 |
| ATOM | 26997 | O    | LYS | 1795 | 53.509 | 97.542  | 97.320  | 0.00 | 0.00 |
| ATOM | 26998 | N    | VAL | 1796 | 55.402 | 98.411  | 96.537  | 0.00 | 0.00 |
| ATOM | 26999 | H    | VAL | 1796 | 56.405 | 98.298  | 96.506  | 0.00 | 0.00 |
| ATOM | 27000 | CA   | VAL | 1796 | 54.843 | 99.692  | 96.219  | 0.00 | 0.00 |
| ATOM | 27001 | HA   | VAL | 1796 | 53.993 | 99.885  | 96.873  | 0.00 | 0.00 |
| ATOM | 27002 | CB   | VAL | 1796 | 56.029 | 100.814 | 96.121  | 0.00 | 0.00 |
| ATOM | 27003 | HB   | VAL | 1796 | 56.639 | 100.573 | 95.251  | 0.00 | 0.00 |
| ATOM | 27004 | CG1  | VAL | 1796 | 55.432 | 102.280 | 96.056  | 0.00 | 0.00 |
| ATOM | 27005 | 1HG1 | VAL | 1796 | 55.229 | 102.695 | 97.044  | 0.00 | 0.00 |
| ATOM | 27006 | 2HG1 | VAL | 1796 | 56.177 | 103.025 | 95.775  | 0.00 | 0.00 |
| ATOM | 27007 | 3HG1 | VAL | 1796 | 54.669 | 102.283 | 95.278  | 0.00 | 0.00 |

|      |       |      |     |      |        |         |        |      |      |
|------|-------|------|-----|------|--------|---------|--------|------|------|
| ATOM | 27008 | CG2  | VAL | 1796 | 56.961 | 100.825 | 97.332 | 0.00 | 0.00 |
| ATOM | 27009 | 1HG2 | VAL | 1796 | 57.485 | 99.874  | 97.421 | 0.00 | 0.00 |
| ATOM | 27010 | 2HG2 | VAL | 1796 | 57.712 | 101.613 | 97.278 | 0.00 | 0.00 |
| ATOM | 27011 | 3HG2 | VAL | 1796 | 56.273 | 101.088 | 98.136 | 0.00 | 0.00 |
| ATOM | 27012 | C    | VAL | 1796 | 54.271 | 99.653  | 94.790 | 0.00 | 0.00 |
| ATOM | 27013 | O    | VAL | 1796 | 53.171 | 100.163 | 94.557 | 0.00 | 0.00 |
| ATOM | 27014 | N    | ILE | 1797 | 54.967 | 99.026  | 93.786 | 0.00 | 0.00 |
| ATOM | 27015 | H    | ILE | 1797 | 55.741 | 98.423  | 94.028 | 0.00 | 0.00 |
| ATOM | 27016 | CA   | ILE | 1797 | 54.520 | 98.850  | 92.455 | 0.00 | 0.00 |
| ATOM | 27017 | HA   | ILE | 1797 | 54.258 | 99.872  | 92.181 | 0.00 | 0.00 |
| ATOM | 27018 | CB   | ILE | 1797 | 55.659 | 98.411  | 91.516 | 0.00 | 0.00 |
| ATOM | 27019 | HB   | ILE | 1797 | 56.005 | 97.423  | 91.820 | 0.00 | 0.00 |
| ATOM | 27020 | CG2  | ILE | 1797 | 55.307 | 98.226  | 90.014 | 0.00 | 0.00 |
| ATOM | 27021 | 1HG2 | ILE | 1797 | 56.200 | 97.830  | 89.531 | 0.00 | 0.00 |
| ATOM | 27022 | 2HG2 | ILE | 1797 | 54.454 | 97.555  | 89.922 | 0.00 | 0.00 |
| ATOM | 27023 | 3HG2 | ILE | 1797 | 55.084 | 99.213  | 89.609 | 0.00 | 0.00 |
| ATOM | 27024 | CG1  | ILE | 1797 | 56.859 | 99.360  | 91.503 | 0.00 | 0.00 |
| ATOM | 27025 | 2HG1 | ILE | 1797 | 56.628 | 100.280 | 90.967 | 0.00 | 0.00 |
| ATOM | 27026 | 3HG1 | ILE | 1797 | 56.974 | 99.633  | 92.552 | 0.00 | 0.00 |
| ATOM | 27027 | CD1  | ILE | 1797 | 58.236 | 98.780  | 90.959 | 0.00 | 0.00 |
| ATOM | 27028 | 1HD1 | ILE | 1797 | 59.033 | 99.523  | 90.984 | 0.00 | 0.00 |
| ATOM | 27029 | 2HD1 | ILE | 1797 | 58.420 | 97.916  | 91.596 | 0.00 | 0.00 |
| ATOM | 27030 | 3HD1 | ILE | 1797 | 58.161 | 98.338  | 89.965 | 0.00 | 0.00 |
| ATOM | 27031 | C    | ILE | 1797 | 53.250 | 98.000  | 92.408 | 0.00 | 0.00 |
| ATOM | 27032 | O    | ILE | 1797 | 53.284 | 96.837  | 91.939 | 0.00 | 0.00 |
| ATOM | 27033 | N    | ARG | 1798 | 52.128 | 98.579  | 92.779 | 0.00 | 0.00 |

|      |       |      |     |      |        |         |        |      |      |
|------|-------|------|-----|------|--------|---------|--------|------|------|
| ATOM | 27034 | H    | ARG | 1798 | 52.264 | 99.452  | 93.269 | 0.00 | 0.00 |
| ATOM | 27035 | CA   | ARG | 1798 | 50.826 | 97.942  | 92.822 | 0.00 | 0.00 |
| ATOM | 27036 | HA   | ARG | 1798 | 50.889 | 97.032  | 92.224 | 0.00 | 0.00 |
| ATOM | 27037 | CB   | ARG | 1798 | 50.257 | 97.536  | 94.211 | 0.00 | 0.00 |
| ATOM | 27038 | HB2  | ARG | 1798 | 50.240 | 98.449  | 94.806 | 0.00 | 0.00 |
| ATOM | 27039 | HB3  | ARG | 1798 | 49.322 | 97.022  | 93.989 | 0.00 | 0.00 |
| ATOM | 27040 | CG   | ARG | 1798 | 51.182 | 96.461  | 94.895 | 0.00 | 0.00 |
| ATOM | 27041 | HG2  | ARG | 1798 | 51.091 | 95.593  | 94.241 | 0.00 | 0.00 |
| ATOM | 27042 | HG3  | ARG | 1798 | 52.181 | 96.878  | 95.027 | 0.00 | 0.00 |
| ATOM | 27043 | CD   | ARG | 1798 | 50.772 | 95.892  | 96.209 | 0.00 | 0.00 |
| ATOM | 27044 | HD2  | ARG | 1798 | 49.765 | 95.482  | 96.133 | 0.00 | 0.00 |
| ATOM | 27045 | HD3  | ARG | 1798 | 51.486 | 95.089  | 96.393 | 0.00 | 0.00 |
| ATOM | 27046 | NE   | ARG | 1798 | 50.789 | 96.901  | 97.277 | 0.00 | 0.00 |
| ATOM | 27047 | HE   | ARG | 1798 | 51.586 | 97.520  | 97.310 | 0.00 | 0.00 |
| ATOM | 27048 | CZ   | ARG | 1798 | 50.031 | 96.926  | 98.374 | 0.00 | 0.00 |
| ATOM | 27049 | NH1  | ARG | 1798 | 49.503 | 95.777  | 98.782 | 0.00 | 0.00 |
| ATOM | 27050 | 1HH1 | ARG | 1798 | 48.684 | 95.840  | 99.370 | 0.00 | 0.00 |
| ATOM | 27051 | 2HH1 | ARG | 1798 | 49.871 | 94.927  | 98.381 | 0.00 | 0.00 |
| ATOM | 27052 | NH2  | ARG | 1798 | 49.895 | 97.943  | 99.133 | 0.00 | 0.00 |
| ATOM | 27053 | 1HH2 | ARG | 1798 | 49.289 | 97.877  | 99.938 | 0.00 | 0.00 |
| ATOM | 27054 | 2HH2 | ARG | 1798 | 50.406 | 98.791  | 98.933 | 0.00 | 0.00 |
| ATOM | 27055 | C    | ARG | 1798 | 49.816 | 98.816  | 92.041 | 0.00 | 0.00 |
| ATOM | 27056 | O    | ARG | 1798 | 49.954 | 100.027 | 91.963 | 0.00 | 0.00 |
| ATOM | 27057 | N    | ASP | 1799 | 48.880 | 98.203  | 91.291 | 0.00 | 0.00 |
| ATOM | 27058 | H    | ASP | 1799 | 48.798 | 97.197  | 91.301 | 0.00 | 0.00 |
| ATOM | 27059 | CA   | ASP | 1799 | 47.782 | 98.884  | 90.548 | 0.00 | 0.00 |

|      |       |     |     |      |        |         |        |      |      |
|------|-------|-----|-----|------|--------|---------|--------|------|------|
| ATOM | 27060 | HA  | ASP | 1799 | 48.261 | 99.466  | 89.760 | 0.00 | 0.00 |
| ATOM | 27061 | CB  | ASP | 1799 | 46.736 | 97.900  | 89.893 | 0.00 | 0.00 |
| ATOM | 27062 | HB2 | ASP | 1799 | 47.244 | 97.201  | 89.227 | 0.00 | 0.00 |
| ATOM | 27063 | HB3 | ASP | 1799 | 46.241 | 97.290  | 90.649 | 0.00 | 0.00 |
| ATOM | 27064 | CG  | ASP | 1799 | 45.722 | 98.655  | 89.008 | 0.00 | 0.00 |
| ATOM | 27065 | OD1 | ASP | 1799 | 46.061 | 99.607  | 88.235 | 0.00 | 0.00 |
| ATOM | 27066 | OD2 | ASP | 1799 | 44.541 | 98.366  | 89.198 | 0.00 | 0.00 |
| ATOM | 27067 | C   | ASP | 1799 | 46.903 | 99.813  | 91.392 | 0.00 | 0.00 |
| ATOM | 27068 | O   | ASP | 1799 | 46.624 | 99.461  | 92.517 | 0.00 | 0.00 |
| ATOM | 27069 | N   | GLY | 1800 | 46.510 | 101.013 | 90.920 | 0.00 | 0.00 |
| ATOM | 27070 | H   | GLY | 1800 | 46.801 | 101.208 | 89.972 | 0.00 | 0.00 |
| ATOM | 27071 | CA  | GLY | 1800 | 46.033 | 102.123 | 91.775 | 0.00 | 0.00 |
| ATOM | 27072 | HA2 | GLY | 1800 | 45.498 | 102.832 | 91.144 | 0.00 | 0.00 |
| ATOM | 27073 | HA3 | GLY | 1800 | 45.383 | 101.737 | 92.561 | 0.00 | 0.00 |
| ATOM | 27074 | C   | GLY | 1800 | 47.087 | 102.926 | 92.511 | 0.00 | 0.00 |
| ATOM | 27075 | O   | GLY | 1800 | 46.946 | 104.109 | 92.711 | 0.00 | 0.00 |
| ATOM | 27076 | N   | MET | 1801 | 48.216 | 102.280 | 92.794 | 0.00 | 0.00 |
| ATOM | 27077 | H   | MET | 1801 | 48.334 | 101.291 | 92.628 | 0.00 | 0.00 |
| ATOM | 27078 | CA  | MET | 1801 | 49.360 | 102.815 | 93.593 | 0.00 | 0.00 |
| ATOM | 27079 | HA  | MET | 1801 | 49.057 | 103.804 | 93.939 | 0.00 | 0.00 |
| ATOM | 27080 | CB  | MET | 1801 | 49.785 | 101.868 | 94.696 | 0.00 | 0.00 |
| ATOM | 27081 | HB2 | MET | 1801 | 50.113 | 100.941 | 94.227 | 0.00 | 0.00 |
| ATOM | 27082 | HB3 | MET | 1801 | 50.526 | 102.443 | 95.253 | 0.00 | 0.00 |
| ATOM | 27083 | CG  | MET | 1801 | 48.634 | 101.614 | 95.645 | 0.00 | 0.00 |
| ATOM | 27084 | HG2 | MET | 1801 | 48.493 | 102.479 | 96.294 | 0.00 | 0.00 |
| ATOM | 27085 | HG3 | MET | 1801 | 47.761 | 101.357 | 95.046 | 0.00 | 0.00 |

|      |       |     |     |      |        |         |        |      |      |
|------|-------|-----|-----|------|--------|---------|--------|------|------|
| ATOM | 27086 | SD  | MET | 1801 | 49.034 | 100.184 | 96.589 | 0.00 | 0.00 |
| ATOM | 27087 | CE  | MET | 1801 | 47.827 | 99.042  | 95.834 | 0.00 | 0.00 |
| ATOM | 27088 | HE1 | MET | 1801 | 47.888 | 98.031  | 96.237 | 0.00 | 0.00 |
| ATOM | 27089 | HE2 | MET | 1801 | 46.840 | 99.453  | 96.045 | 0.00 | 0.00 |
| ATOM | 27090 | HE3 | MET | 1801 | 47.953 | 98.938  | 94.756 | 0.00 | 0.00 |
| ATOM | 27091 | C   | MET | 1801 | 50.561 | 103.074 | 92.688 | 0.00 | 0.00 |
| ATOM | 27092 | O   | MET | 1801 | 50.491 | 103.863 | 91.740 | 0.00 | 0.00 |
| ATOM | 27093 | N   | GLY | 1802 | 51.799 | 102.559 | 92.959 | 0.00 | 0.00 |
| ATOM | 27094 | H   | GLY | 1802 | 51.777 | 101.812 | 93.639 | 0.00 | 0.00 |
| ATOM | 27095 | CA  | GLY | 1802 | 53.087 | 102.875 | 92.170 | 0.00 | 0.00 |
| ATOM | 27096 | HA2 | GLY | 1802 | 53.291 | 103.945 | 92.207 | 0.00 | 0.00 |
| ATOM | 27097 | HA3 | GLY | 1802 | 53.948 | 102.555 | 92.757 | 0.00 | 0.00 |
| ATOM | 27098 | C   | GLY | 1802 | 53.226 | 102.318 | 90.790 | 0.00 | 0.00 |
| ATOM | 27099 | O   | GLY | 1802 | 54.076 | 102.701 | 90.017 | 0.00 | 0.00 |
| ATOM | 27100 | N   | GLN | 1803 | 52.260 | 101.503 | 90.426 | 0.00 | 0.00 |
| ATOM | 27101 | H   | GLN | 1803 | 51.549 | 101.372 | 91.131 | 0.00 | 0.00 |
| ATOM | 27102 | CA  | GLN | 1803 | 51.873 | 101.135 | 89.048 | 0.00 | 0.00 |
| ATOM | 27103 | HA  | GLN | 1803 | 52.627 | 101.389 | 88.303 | 0.00 | 0.00 |
| ATOM | 27104 | CB  | GLN | 1803 | 51.602 | 99.585  | 88.929 | 0.00 | 0.00 |
| ATOM | 27105 | HB2 | GLN | 1803 | 52.448 | 99.150  | 89.462 | 0.00 | 0.00 |
| ATOM | 27106 | HB3 | GLN | 1803 | 50.753 | 99.261  | 89.530 | 0.00 | 0.00 |
| ATOM | 27107 | CG  | GLN | 1803 | 51.332 | 99.125  | 87.465 | 0.00 | 0.00 |
| ATOM | 27108 | HG2 | GLN | 1803 | 50.542 | 99.691  | 86.970 | 0.00 | 0.00 |
| ATOM | 27109 | HG3 | GLN | 1803 | 52.206 | 99.269  | 86.830 | 0.00 | 0.00 |
| ATOM | 27110 | CD  | GLN | 1803 | 50.934 | 97.673  | 87.320 | 0.00 | 0.00 |
| ATOM | 27111 | OE1 | GLN | 1803 | 51.762 | 96.759  | 87.246 | 0.00 | 0.00 |

|      |       |      |     |      |        |         |        |      |      |
|------|-------|------|-----|------|--------|---------|--------|------|------|
| ATOM | 27112 | NE2  | GLN | 1803 | 49.778 | 97.369  | 86.846 | 0.00 | 0.00 |
| ATOM | 27113 | 1HE2 | GLN | 1803 | 49.397 | 96.479  | 87.133 | 0.00 | 0.00 |
| ATOM | 27114 | 2HE2 | GLN | 1803 | 49.138 | 98.143  | 86.743 | 0.00 | 0.00 |
| ATOM | 27115 | C    | GLN | 1803 | 50.554 | 101.742 | 88.750 | 0.00 | 0.00 |
| ATOM | 27116 | O    | GLN | 1803 | 49.627 | 101.763 | 89.542 | 0.00 | 0.00 |
| ATOM | 27117 | N    | GLY | 1804 | 50.441 | 102.449 | 87.614 | 0.00 | 0.00 |
| ATOM | 27118 | H    | GLY | 1804 | 51.264 | 102.530 | 87.034 | 0.00 | 0.00 |
| ATOM | 27119 | CA   | GLY | 1804 | 49.322 | 103.300 | 87.254 | 0.00 | 0.00 |
| ATOM | 27120 | HA2  | GLY | 1804 | 48.550 | 103.197 | 88.016 | 0.00 | 0.00 |
| ATOM | 27121 | HA3  | GLY | 1804 | 49.562 | 104.361 | 87.185 | 0.00 | 0.00 |
| ATOM | 27122 | C    | GLY | 1804 | 48.542 | 103.012 | 86.028 | 0.00 | 0.00 |
| ATOM | 27123 | O    | GLY | 1804 | 48.737 | 102.033 | 85.246 | 0.00 | 0.00 |
| ATOM | 27124 | N    | GLN | 1805 | 47.551 | 103.871 | 85.768 | 0.00 | 0.00 |
| ATOM | 27125 | H    | GLN | 1805 | 47.350 | 104.690 | 86.324 | 0.00 | 0.00 |
| ATOM | 27126 | CA   | GLN | 1805 | 46.384 | 103.420 | 84.952 | 0.00 | 0.00 |
| ATOM | 27127 | HA   | GLN | 1805 | 46.709 | 102.420 | 84.665 | 0.00 | 0.00 |
| ATOM | 27128 | CB   | GLN | 1805 | 45.118 | 103.444 | 85.779 | 0.00 | 0.00 |
| ATOM | 27129 | HB2  | GLN | 1805 | 45.058 | 104.453 | 86.186 | 0.00 | 0.00 |
| ATOM | 27130 | HB3  | GLN | 1805 | 44.187 | 103.300 | 85.230 | 0.00 | 0.00 |
| ATOM | 27131 | CG   | GLN | 1805 | 45.185 | 102.412 | 86.910 | 0.00 | 0.00 |
| ATOM | 27132 | HG2  | GLN | 1805 | 45.180 | 101.468 | 86.366 | 0.00 | 0.00 |
| ATOM | 27133 | HG3  | GLN | 1805 | 46.116 | 102.496 | 87.471 | 0.00 | 0.00 |
| ATOM | 27134 | CD   | GLN | 1805 | 44.025 | 102.461 | 87.929 | 0.00 | 0.00 |
| ATOM | 27135 | OE1  | GLN | 1805 | 43.189 | 103.343 | 87.945 | 0.00 | 0.00 |
| ATOM | 27136 | NE2  | GLN | 1805 | 44.046 | 101.439 | 88.805 | 0.00 | 0.00 |
| ATOM | 27137 | 1HE2 | GLN | 1805 | 43.336 | 101.418 | 89.524 | 0.00 | 0.00 |

|      |       |      |     |      |        |         |        |      |      |
|------|-------|------|-----|------|--------|---------|--------|------|------|
| ATOM | 27138 | 2HE2 | GLN | 1805 | 44.819 | 100.800 | 88.691 | 0.00 | 0.00 |
| ATOM | 27139 | C    | GLN | 1805 | 46.261 | 104.216 | 83.674 | 0.00 | 0.00 |
| ATOM | 27140 | O    | GLN | 1805 | 45.161 | 104.372 | 83.212 | 0.00 | 0.00 |
| ATOM | 27141 | N    | MET | 1806 | 47.405 | 104.552 | 83.116 | 0.00 | 0.00 |
| ATOM | 27142 | H    | MET | 1806 | 48.237 | 104.239 | 83.595 | 0.00 | 0.00 |
| ATOM | 27143 | CA   | MET | 1806 | 47.586 | 105.113 | 81.817 | 0.00 | 0.00 |
| ATOM | 27144 | HA   | MET | 1806 | 46.807 | 105.842 | 81.591 | 0.00 | 0.00 |
| ATOM | 27145 | CB   | MET | 1806 | 48.882 | 105.924 | 81.847 | 0.00 | 0.00 |
| ATOM | 27146 | HB2  | MET | 1806 | 48.993 | 106.521 | 80.942 | 0.00 | 0.00 |
| ATOM | 27147 | HB3  | MET | 1806 | 48.810 | 106.608 | 82.692 | 0.00 | 0.00 |
| ATOM | 27148 | CG   | MET | 1806 | 50.151 | 105.033 | 81.975 | 0.00 | 0.00 |
| ATOM | 27149 | HG2  | MET | 1806 | 50.034 | 104.128 | 81.378 | 0.00 | 0.00 |
| ATOM | 27150 | HG3  | MET | 1806 | 51.005 | 105.658 | 81.715 | 0.00 | 0.00 |
| ATOM | 27151 | SD   | MET | 1806 | 50.617 | 104.548 | 83.619 | 0.00 | 0.00 |
| ATOM | 27152 | CE   | MET | 1806 | 51.074 | 106.074 | 84.542 | 0.00 | 0.00 |
| ATOM | 27153 | HE1  | MET | 1806 | 50.225 | 106.757 | 84.536 | 0.00 | 0.00 |
| ATOM | 27154 | HE2  | MET | 1806 | 51.428 | 105.838 | 85.546 | 0.00 | 0.00 |
| ATOM | 27155 | HE3  | MET | 1806 | 51.909 | 106.555 | 84.032 | 0.00 | 0.00 |
| ATOM | 27156 | C    | MET | 1806 | 47.512 | 104.096 | 80.761 | 0.00 | 0.00 |
| ATOM | 27157 | O    | MET | 1806 | 47.662 | 102.879 | 80.945 | 0.00 | 0.00 |
| ATOM | 27158 | N    | LEU | 1807 | 47.026 | 104.498 | 79.561 | 0.00 | 0.00 |
| ATOM | 27159 | H    | LEU | 1807 | 46.601 | 105.401 | 79.410 | 0.00 | 0.00 |
| ATOM | 27160 | CA   | LEU | 1807 | 46.773 | 103.466 | 78.554 | 0.00 | 0.00 |
| ATOM | 27161 | HA   | LEU | 1807 | 46.188 | 102.612 | 78.896 | 0.00 | 0.00 |
| ATOM | 27162 | CB   | LEU | 1807 | 46.153 | 104.241 | 77.374 | 0.00 | 0.00 |
| ATOM | 27163 | HB2  | LEU | 1807 | 46.817 | 104.940 | 76.865 | 0.00 | 0.00 |



|            |      |     |      |        |         |        |      |      |
|------------|------|-----|------|--------|---------|--------|------|------|
| ATOM 27164 | HB3  | LEU | 1807 | 46.083 | 103.483 | 76.594 | 0.00 | 0.00 |
| ATOM 27165 | CG   | LEU | 1807 | 44.728 | 104.851 | 77.451 | 0.00 | 0.00 |
| ATOM 27166 | HG   | LEU | 1807 | 44.841 | 105.745 | 78.064 | 0.00 | 0.00 |
| ATOM 27167 | CD1  | LEU | 1807 | 44.283 | 105.221 | 76.023 | 0.00 | 0.00 |
| ATOM 27168 | 1HD1 | LEU | 1807 | 44.974 | 105.916 | 75.546 | 0.00 | 0.00 |
| ATOM 27169 | 2HD1 | LEU | 1807 | 44.190 | 104.279 | 75.483 | 0.00 | 0.00 |
| ATOM 27170 | 3HD1 | LEU | 1807 | 43.331 | 105.752 | 76.026 | 0.00 | 0.00 |
| ATOM 27171 | CD2  | LEU | 1807 | 43.803 | 103.912 | 78.209 | 0.00 | 0.00 |
| ATOM 27172 | 1HD2 | LEU | 1807 | 43.867 | 102.906 | 77.794 | 0.00 | 0.00 |
| ATOM 27173 | 2HD2 | LEU | 1807 | 44.068 | 103.848 | 79.264 | 0.00 | 0.00 |
| ATOM 27174 | 3HD2 | LEU | 1807 | 42.816 | 104.361 | 78.097 | 0.00 | 0.00 |
| ATOM 27175 | C    | LEU | 1807 | 48.087 | 102.791 | 78.124 | 0.00 | 0.00 |
| ATOM 27176 | O    | LEU | 1807 | 49.148 | 103.439 | 78.100 | 0.00 | 0.00 |
| ATOM 27177 | N    | ALA | 1808 | 48.154 | 101.605 | 77.637 | 0.00 | 0.00 |
| ATOM 27178 | H    | ALA | 1808 | 47.312 | 101.131 | 77.343 | 0.00 | 0.00 |
| ATOM 27179 | CA   | ALA | 1808 | 49.428 | 100.809 | 77.582 | 0.00 | 0.00 |
| ATOM 27180 | HA   | ALA | 1808 | 49.869 | 100.662 | 78.568 | 0.00 | 0.00 |
| ATOM 27181 | CB   | ALA | 1808 | 49.049 | 99.463  | 76.977 | 0.00 | 0.00 |
| ATOM 27182 | HB1  | ALA | 1808 | 49.901 | 98.789  | 77.070 | 0.00 | 0.00 |
| ATOM 27183 | HB2  | ALA | 1808 | 48.178 | 99.064  | 77.497 | 0.00 | 0.00 |
| ATOM 27184 | HB3  | ALA | 1808 | 48.818 | 99.633  | 75.926 | 0.00 | 0.00 |
| ATOM 27185 | C    | ALA | 1808 | 50.743 | 101.346 | 76.798 | 0.00 | 0.00 |
| ATOM 27186 | O    | ALA | 1808 | 51.890 | 101.084 | 77.020 | 0.00 | 0.00 |
| ATOM 27187 | N    | ALA | 1809 | 50.499 | 102.232 | 75.830 | 0.00 | 0.00 |
| ATOM 27188 | H    | ALA | 1809 | 49.517 | 102.332 | 75.615 | 0.00 | 0.00 |
| ATOM 27189 | CA   | ALA | 1809 | 51.441 | 102.999 | 75.025 | 0.00 | 0.00 |

|      |       |     |     |      |        |         |        |      |      |
|------|-------|-----|-----|------|--------|---------|--------|------|------|
| ATOM | 27190 | HA  | ALA | 1809 | 52.278 | 102.358 | 74.749 | 0.00 | 0.00 |
| ATOM | 27191 | CB  | ALA | 1809 | 50.714 | 103.411 | 73.704 | 0.00 | 0.00 |
| ATOM | 27192 | HB1 | ALA | 1809 | 49.733 | 103.876 | 73.807 | 0.00 | 0.00 |
| ATOM | 27193 | HB2 | ALA | 1809 | 51.454 | 103.922 | 73.087 | 0.00 | 0.00 |
| ATOM | 27194 | HB3 | ALA | 1809 | 50.411 | 102.489 | 73.209 | 0.00 | 0.00 |
| ATOM | 27195 | C   | ALA | 1809 | 52.128 | 104.151 | 75.734 | 0.00 | 0.00 |
| ATOM | 27196 | O   | ALA | 1809 | 53.179 | 104.658 | 75.322 | 0.00 | 0.00 |
| ATOM | 27197 | N   | ASP | 1810 | 51.397 | 104.625 | 76.780 | 0.00 | 0.00 |
| ATOM | 27198 | H   | ASP | 1810 | 50.551 | 104.212 | 77.145 | 0.00 | 0.00 |
| ATOM | 27199 | CA  | ASP | 1810 | 51.868 | 105.842 | 77.506 | 0.00 | 0.00 |
| ATOM | 27200 | HA  | ASP | 1810 | 52.431 | 106.465 | 76.810 | 0.00 | 0.00 |
| ATOM | 27201 | CB  | ASP | 1810 | 50.654 | 106.631 | 77.999 | 0.00 | 0.00 |
| ATOM | 27202 | HB2 | ASP | 1810 | 50.082 | 106.937 | 77.124 | 0.00 | 0.00 |
| ATOM | 27203 | HB3 | ASP | 1810 | 50.004 | 105.952 | 78.551 | 0.00 | 0.00 |
| ATOM | 27204 | CG  | ASP | 1810 | 50.853 | 107.887 | 78.812 | 0.00 | 0.00 |
| ATOM | 27205 | OD1 | ASP | 1810 | 51.641 | 108.759 | 78.317 | 0.00 | 0.00 |
| ATOM | 27206 | OD2 | ASP | 1810 | 50.113 | 108.120 | 79.763 | 0.00 | 0.00 |
| ATOM | 27207 | C   | ASP | 1810 | 52.743 | 105.502 | 78.737 | 0.00 | 0.00 |
| ATOM | 27208 | O   | ASP | 1810 | 53.548 | 106.278 | 79.286 | 0.00 | 0.00 |
| ATOM | 27209 | N   | CYS | 1811 | 52.713 | 104.246 | 79.157 | 0.00 | 0.00 |
| ATOM | 27210 | H   | CYS | 1811 | 51.994 | 103.622 | 78.821 | 0.00 | 0.00 |
| ATOM | 27211 | CA  | CYS | 1811 | 53.646 | 103.683 | 80.149 | 0.00 | 0.00 |
| ATOM | 27212 | HA  | CYS | 1811 | 54.016 | 104.421 | 80.861 | 0.00 | 0.00 |
| ATOM | 27213 | CB  | CYS | 1811 | 52.874 | 102.672 | 81.136 | 0.00 | 0.00 |
| ATOM | 27214 | HB2 | CYS | 1811 | 53.645 | 102.079 | 81.629 | 0.00 | 0.00 |
| ATOM | 27215 | HB3 | CYS | 1811 | 52.372 | 103.279 | 81.890 | 0.00 | 0.00 |

|      |       |      |     |      |        |         |        |      |      |
|------|-------|------|-----|------|--------|---------|--------|------|------|
| ATOM | 27216 | SG   | CYS | 1811 | 51.652 | 101.525 | 80.378 | 0.00 | 0.00 |
| ATOM | 27217 | HG   | CYS | 1811 | 52.212 | 101.142 | 79.228 | 0.00 | 0.00 |
| ATOM | 27218 | C    | CYS | 1811 | 54.833 | 102.987 | 79.441 | 0.00 | 0.00 |
| ATOM | 27219 | O    | CYS | 1811 | 54.602 | 102.579 | 78.293 | 0.00 | 0.00 |
| ATOM | 27220 | N    | VAL | 1812 | 55.963 | 102.745 | 80.092 | 0.00 | 0.00 |
| ATOM | 27221 | H    | VAL | 1812 | 56.072 | 103.039 | 81.052 | 0.00 | 0.00 |
| ATOM | 27222 | CA   | VAL | 1812 | 57.098 | 102.001 | 79.521 | 0.00 | 0.00 |
| ATOM | 27223 | HA   | VAL | 1812 | 57.251 | 102.394 | 78.516 | 0.00 | 0.00 |
| ATOM | 27224 | CB   | VAL | 1812 | 58.456 | 102.159 | 80.293 | 0.00 | 0.00 |
| ATOM | 27225 | HB   | VAL | 1812 | 59.208 | 101.510 | 79.844 | 0.00 | 0.00 |
| ATOM | 27226 | CG1  | VAL | 1812 | 58.927 | 103.608 | 80.100 | 0.00 | 0.00 |
| ATOM | 27227 | 1HG1 | VAL | 1812 | 58.318 | 104.266 | 80.720 | 0.00 | 0.00 |
| ATOM | 27228 | 2HG1 | VAL | 1812 | 59.952 | 103.658 | 80.466 | 0.00 | 0.00 |
| ATOM | 27229 | 3HG1 | VAL | 1812 | 58.963 | 103.989 | 79.079 | 0.00 | 0.00 |
| ATOM | 27230 | CG2  | VAL | 1812 | 58.421 | 101.858 | 81.796 | 0.00 | 0.00 |
| ATOM | 27231 | 1HG2 | VAL | 1812 | 59.403 | 101.931 | 82.263 | 0.00 | 0.00 |
| ATOM | 27232 | 2HG2 | VAL | 1812 | 57.806 | 102.627 | 82.264 | 0.00 | 0.00 |
| ATOM | 27233 | 3HG2 | VAL | 1812 | 58.034 | 100.854 | 81.974 | 0.00 | 0.00 |
| ATOM | 27234 | C    | VAL | 1812 | 56.747 | 100.453 | 79.439 | 0.00 | 0.00 |
| ATOM | 27235 | O    | VAL | 1812 | 55.835 | 100.004 | 80.140 | 0.00 | 0.00 |
| ATOM | 27236 | N    | ASP | 1813 | 57.544 | 99.678  | 78.660 | 0.00 | 0.00 |
| ATOM | 27237 | H    | ASP | 1813 | 58.354 | 100.115 | 78.244 | 0.00 | 0.00 |
| ATOM | 27238 | CA   | ASP | 1813 | 57.359 | 98.254  | 78.396 | 0.00 | 0.00 |
| ATOM | 27239 | HA   | ASP | 1813 | 56.313 | 98.070  | 78.640 | 0.00 | 0.00 |
| ATOM | 27240 | CB   | ASP | 1813 | 57.707 | 97.887  | 76.935 | 0.00 | 0.00 |
| ATOM | 27241 | HB2  | ASP | 1813 | 58.738 | 98.217  | 76.807 | 0.00 | 0.00 |

|      |       |      |     |      |        |        |        |      |      |
|------|-------|------|-----|------|--------|--------|--------|------|------|
| ATOM | 27242 | HB3  | ASP | 1813 | 57.607 | 96.804 | 76.860 | 0.00 | 0.00 |
| ATOM | 27243 | CG   | ASP | 1813 | 56.790 | 98.670 | 75.986 | 0.00 | 0.00 |
| ATOM | 27244 | OD1  | ASP | 1813 | 55.575 | 98.684 | 76.218 | 0.00 | 0.00 |
| ATOM | 27245 | OD2  | ASP | 1813 | 57.243 | 99.280 | 74.994 | 0.00 | 0.00 |
| ATOM | 27246 | C    | ASP | 1813 | 58.281 | 97.417 | 79.393 | 0.00 | 0.00 |
| ATOM | 27247 | O    | ASP | 1813 | 57.978 | 96.299 | 79.807 | 0.00 | 0.00 |
| ATOM | 27248 | N    | LEU | 1814 | 59.456 | 98.022 | 79.723 | 0.00 | 0.00 |
| ATOM | 27249 | H    | LEU | 1814 | 59.809 | 98.823 | 79.218 | 0.00 | 0.00 |
| ATOM | 27250 | CA   | LEU | 1814 | 60.355 | 97.524 | 80.773 | 0.00 | 0.00 |
| ATOM | 27251 | HA   | LEU | 1814 | 59.856 | 96.862 | 81.480 | 0.00 | 0.00 |
| ATOM | 27252 | CB   | LEU | 1814 | 61.519 | 96.670 | 80.255 | 0.00 | 0.00 |
| ATOM | 27253 | HB2  | LEU | 1814 | 61.046 | 95.860 | 79.698 | 0.00 | 0.00 |
| ATOM | 27254 | HB3  | LEU | 1814 | 61.916 | 97.156 | 79.364 | 0.00 | 0.00 |
| ATOM | 27255 | CG   | LEU | 1814 | 62.508 | 95.947 | 81.136 | 0.00 | 0.00 |
| ATOM | 27256 | HG   | LEU | 1814 | 62.028 | 95.825 | 82.107 | 0.00 | 0.00 |
| ATOM | 27257 | CD1  | LEU | 1814 | 63.088 | 94.672 | 80.532 | 0.00 | 0.00 |
| ATOM | 27258 | 1HD1 | LEU | 1814 | 63.568 | 94.928 | 79.587 | 0.00 | 0.00 |
| ATOM | 27259 | 2HD1 | LEU | 1814 | 63.916 | 94.338 | 81.157 | 0.00 | 0.00 |
| ATOM | 27260 | 3HD1 | LEU | 1814 | 62.318 | 93.919 | 80.367 | 0.00 | 0.00 |
| ATOM | 27261 | CD2  | LEU | 1814 | 63.769 | 96.764 | 81.450 | 0.00 | 0.00 |
| ATOM | 27262 | 1HD2 | LEU | 1814 | 63.469 | 97.696 | 81.930 | 0.00 | 0.00 |
| ATOM | 27263 | 2HD2 | LEU | 1814 | 64.514 | 96.265 | 82.069 | 0.00 | 0.00 |
| ATOM | 27264 | 3HD2 | LEU | 1814 | 64.176 | 97.048 | 80.479 | 0.00 | 0.00 |
| ATOM | 27265 | C    | LEU | 1814 | 60.765 | 98.748 | 81.680 | 0.00 | 0.00 |
| ATOM | 27266 | O    | LEU | 1814 | 60.883 | 99.877 | 81.163 | 0.00 | 0.00 |
| ATOM | 27267 | N    | VAL | 1815 | 60.983 | 98.449 | 82.940 | 0.00 | 0.00 |

|      |       |      |     |      |        |         |        |      |      |
|------|-------|------|-----|------|--------|---------|--------|------|------|
| ATOM | 27268 | H    | VAL | 1815 | 60.879 | 97.484  | 83.217 | 0.00 | 0.00 |
| ATOM | 27269 | CA   | VAL | 1815 | 61.595 | 99.350  | 83.959 | 0.00 | 0.00 |
| ATOM | 27270 | HA   | VAL | 1815 | 62.067 | 100.107 | 83.333 | 0.00 | 0.00 |
| ATOM | 27271 | CB   | VAL | 1815 | 60.553 | 100.102 | 84.772 | 0.00 | 0.00 |
| ATOM | 27272 | HB   | VAL | 1815 | 59.810 | 100.480 | 84.069 | 0.00 | 0.00 |
| ATOM | 27273 | CG1  | VAL | 1815 | 59.860 | 99.363  | 85.915 | 0.00 | 0.00 |
| ATOM | 27274 | 1HG1 | VAL | 1815 | 59.213 | 98.547  | 85.595 | 0.00 | 0.00 |
| ATOM | 27275 | 2HG1 | VAL | 1815 | 60.558 | 98.885  | 86.603 | 0.00 | 0.00 |
| ATOM | 27276 | 3HG1 | VAL | 1815 | 59.202 | 100.113 | 86.353 | 0.00 | 0.00 |
| ATOM | 27277 | CG2  | VAL | 1815 | 61.188 | 101.343 | 85.437 | 0.00 | 0.00 |
| ATOM | 27278 | 1HG2 | VAL | 1815 | 60.432 | 102.109 | 85.606 | 0.00 | 0.00 |
| ATOM | 27279 | 2HG2 | VAL | 1815 | 61.739 | 101.028 | 86.324 | 0.00 | 0.00 |
| ATOM | 27280 | 3HG2 | VAL | 1815 | 61.872 | 101.894 | 84.792 | 0.00 | 0.00 |
| ATOM | 27281 | C    | VAL | 1815 | 62.724 | 98.715  | 84.752 | 0.00 | 0.00 |
| ATOM | 27282 | O    | VAL | 1815 | 62.618 | 97.613  | 85.267 | 0.00 | 0.00 |
| ATOM | 27283 | N    | LEU | 1816 | 63.869 | 99.446  | 84.759 | 0.00 | 0.00 |
| ATOM | 27284 | H    | LEU | 1816 | 63.823 | 100.361 | 84.334 | 0.00 | 0.00 |
| ATOM | 27285 | CA   | LEU | 1816 | 65.043 | 99.161  | 85.572 | 0.00 | 0.00 |
| ATOM | 27286 | HA   | LEU | 1816 | 64.956 | 98.129  | 85.914 | 0.00 | 0.00 |
| ATOM | 27287 | CB   | LEU | 1816 | 66.338 | 99.209  | 84.781 | 0.00 | 0.00 |
| ATOM | 27288 | HB2  | LEU | 1816 | 66.171 | 99.111  | 83.709 | 0.00 | 0.00 |
| ATOM | 27289 | HB3  | LEU | 1816 | 66.829 | 100.179 | 84.865 | 0.00 | 0.00 |
| ATOM | 27290 | CG   | LEU | 1816 | 67.428 | 98.116  | 85.015 | 0.00 | 0.00 |
| ATOM | 27291 | HG   | LEU | 1816 | 66.996 | 97.255  | 84.504 | 0.00 | 0.00 |
| ATOM | 27292 | CD1  | LEU | 1816 | 68.786 | 98.495  | 84.353 | 0.00 | 0.00 |
| ATOM | 27293 | 1HD1 | LEU | 1816 | 69.250 | 99.307  | 84.912 | 0.00 | 0.00 |

|      |       |      |     |      |        |         |        |      |      |
|------|-------|------|-----|------|--------|---------|--------|------|------|
| ATOM | 27294 | 2HD1 | LEU | 1816 | 69.469 | 97.646  | 84.371 | 0.00 | 0.00 |
| ATOM | 27295 | 3HD1 | LEU | 1816 | 68.713 | 98.805  | 83.310 | 0.00 | 0.00 |
| ATOM | 27296 | CD2  | LEU | 1816 | 67.606 | 97.810  | 86.514 | 0.00 | 0.00 |
| ATOM | 27297 | 1HD2 | LEU | 1816 | 67.856 | 98.676  | 87.127 | 0.00 | 0.00 |
| ATOM | 27298 | 2HD2 | LEU | 1816 | 66.694 | 97.330  | 86.870 | 0.00 | 0.00 |
| ATOM | 27299 | 3HD2 | LEU | 1816 | 68.421 | 97.087  | 86.498 | 0.00 | 0.00 |
| ATOM | 27300 | C    | LEU | 1816 | 64.918 | 100.082 | 86.842 | 0.00 | 0.00 |
| ATOM | 27301 | O    | LEU | 1816 | 64.767 | 101.295 | 86.718 | 0.00 | 0.00 |
| ATOM | 27302 | N    | THR | 1817 | 64.819 | 99.499  | 88.045 | 0.00 | 0.00 |
| ATOM | 27303 | H    | THR | 1817 | 65.027 | 98.520  | 88.182 | 0.00 | 0.00 |
| ATOM | 27304 | CA   | THR | 1817 | 64.399 | 100.110 | 89.302 | 0.00 | 0.00 |
| ATOM | 27305 | HA   | THR | 1817 | 64.047 | 101.123 | 89.105 | 0.00 | 0.00 |
| ATOM | 27306 | CB   | THR | 1817 | 63.189 | 99.467  | 89.936 | 0.00 | 0.00 |
| ATOM | 27307 | HB   | THR | 1817 | 63.004 | 99.839  | 90.943 | 0.00 | 0.00 |
| ATOM | 27308 | CG2  | THR | 1817 | 61.975 | 99.784  | 89.197 | 0.00 | 0.00 |
| ATOM | 27309 | 1HG2 | THR | 1817 | 61.105 | 99.466  | 89.771 | 0.00 | 0.00 |
| ATOM | 27310 | 2HG2 | THR | 1817 | 61.931 | 100.837 | 88.921 | 0.00 | 0.00 |
| ATOM | 27311 | 3HG2 | THR | 1817 | 61.969 | 99.178  | 88.290 | 0.00 | 0.00 |
| ATOM | 27312 | OG1  | THR | 1817 | 63.332 | 98.058  | 90.123 | 0.00 | 0.00 |
| ATOM | 27313 | HG1  | THR | 1817 | 63.510 | 97.704  | 89.249 | 0.00 | 0.00 |
| ATOM | 27314 | C    | THR | 1817 | 65.570 | 100.092 | 90.259 | 0.00 | 0.00 |
| ATOM | 27315 | O    | THR | 1817 | 66.170 | 99.111  | 90.567 | 0.00 | 0.00 |
| ATOM | 27316 | N    | ASN | 1818 | 65.924 | 101.228 | 90.890 | 0.00 | 0.00 |
| ATOM | 27317 | H    | ASN | 1818 | 65.431 | 102.027 | 90.517 | 0.00 | 0.00 |
| ATOM | 27318 | CA   | ASN | 1818 | 66.988 | 101.439 | 91.905 | 0.00 | 0.00 |
| ATOM | 27319 | HA   | ASN | 1818 | 67.099 | 102.486 | 92.187 | 0.00 | 0.00 |

|      |       |      |     |      |        |         |        |      |      |
|------|-------|------|-----|------|--------|---------|--------|------|------|
| ATOM | 27320 | CB   | ASN | 1818 | 66.597 | 100.731 | 93.232 | 0.00 | 0.00 |
| ATOM | 27321 | HB2  | ASN | 1818 | 65.518 | 100.882 | 93.267 | 0.00 | 0.00 |
| ATOM | 27322 | HB3  | ASN | 1818 | 66.790 | 99.667  | 93.096 | 0.00 | 0.00 |
| ATOM | 27323 | CG   | ASN | 1818 | 67.280 | 101.203 | 94.503 | 0.00 | 0.00 |
| ATOM | 27324 | OD1  | ASN | 1818 | 67.876 | 100.454 | 95.252 | 0.00 | 0.00 |
| ATOM | 27325 | ND2  | ASN | 1818 | 67.195 | 102.446 | 94.892 | 0.00 | 0.00 |
| ATOM | 27326 | 1HD2 | ASN | 1818 | 67.581 | 102.722 | 95.784 | 0.00 | 0.00 |
| ATOM | 27327 | 2HD2 | ASN | 1818 | 66.465 | 103.037 | 94.520 | 0.00 | 0.00 |
| ATOM | 27328 | C    | ASN | 1818 | 68.469 | 101.050 | 91.538 | 0.00 | 0.00 |
| ATOM | 27329 | O    | ASN | 1818 | 69.203 | 100.357 | 92.283 | 0.00 | 0.00 |
| ATOM | 27330 | N    | ALA | 1819 | 68.936 | 101.597 | 90.404 | 0.00 | 0.00 |
| ATOM | 27331 | H    | ALA | 1819 | 68.341 | 102.263 | 89.931 | 0.00 | 0.00 |
| ATOM | 27332 | CA   | ALA | 1819 | 70.240 | 101.251 | 89.863 | 0.00 | 0.00 |
| ATOM | 27333 | HA   | ALA | 1819 | 70.670 | 100.343 | 90.287 | 0.00 | 0.00 |
| ATOM | 27334 | CB   | ALA | 1819 | 70.052 | 100.987 | 88.285 | 0.00 | 0.00 |
| ATOM | 27335 | HB1  | ALA | 1819 | 70.997 | 100.898 | 87.749 | 0.00 | 0.00 |
| ATOM | 27336 | HB2  | ALA | 1819 | 69.305 | 100.197 | 88.213 | 0.00 | 0.00 |
| ATOM | 27337 | HB3  | ALA | 1819 | 69.408 | 101.805 | 87.963 | 0.00 | 0.00 |
| ATOM | 27338 | C    | ALA | 1819 | 71.196 | 102.390 | 90.231 | 0.00 | 0.00 |
| ATOM | 27339 | O    | ALA | 1819 | 70.811 | 103.538 | 90.397 | 0.00 | 0.00 |
| ATOM | 27340 | N    | LEU | 1820 | 72.542 | 102.141 | 90.177 | 0.00 | 0.00 |
| ATOM | 27341 | H    | LEU | 1820 | 72.832 | 101.175 | 90.223 | 0.00 | 0.00 |
| ATOM | 27342 | CA   | LEU | 1820 | 73.537 | 103.199 | 89.776 | 0.00 | 0.00 |
| ATOM | 27343 | HA   | LEU | 1820 | 73.065 | 104.176 | 89.873 | 0.00 | 0.00 |
| ATOM | 27344 | CB   | LEU | 1820 | 74.656 | 103.279 | 90.796 | 0.00 | 0.00 |
| ATOM | 27345 | HB2  | LEU | 1820 | 74.222 | 103.730 | 91.688 | 0.00 | 0.00 |

|      |       |      |     |      |        |         |        |      |      |
|------|-------|------|-----|------|--------|---------|--------|------|------|
| ATOM | 27346 | HB3  | LEU | 1820 | 75.031 | 102.272 | 90.980 | 0.00 | 0.00 |
| ATOM | 27347 | CG   | LEU | 1820 | 75.926 | 104.115 | 90.443 | 0.00 | 0.00 |
| ATOM | 27348 | HG   | LEU | 1820 | 76.316 | 103.677 | 89.525 | 0.00 | 0.00 |
| ATOM | 27349 | CD1  | LEU | 1820 | 75.606 | 105.539 | 90.218 | 0.00 | 0.00 |
| ATOM | 27350 | 1HD1 | LEU | 1820 | 75.399 | 105.991 | 91.188 | 0.00 | 0.00 |
| ATOM | 27351 | 2HD1 | LEU | 1820 | 76.407 | 106.046 | 89.680 | 0.00 | 0.00 |
| ATOM | 27352 | 3HD1 | LEU | 1820 | 74.703 | 105.525 | 89.607 | 0.00 | 0.00 |
| ATOM | 27353 | CD2  | LEU | 1820 | 77.017 | 103.855 | 91.492 | 0.00 | 0.00 |
| ATOM | 27354 | 1HD2 | LEU | 1820 | 77.876 | 104.502 | 91.317 | 0.00 | 0.00 |
| ATOM | 27355 | 2HD2 | LEU | 1820 | 76.573 | 104.102 | 92.456 | 0.00 | 0.00 |
| ATOM | 27356 | 3HD2 | LEU | 1820 | 77.296 | 102.803 | 91.556 | 0.00 | 0.00 |
| ATOM | 27357 | C    | LEU | 1820 | 74.038 | 102.981 | 88.374 | 0.00 | 0.00 |
| ATOM | 27358 | O    | LEU | 1820 | 74.365 | 101.900 | 87.948 | 0.00 | 0.00 |
| ATOM | 27359 | N    | ILE | 1821 | 74.103 | 104.073 | 87.568 | 0.00 | 0.00 |
| ATOM | 27360 | H    | ILE | 1821 | 73.663 | 104.941 | 87.836 | 0.00 | 0.00 |
| ATOM | 27361 | CA   | ILE | 1821 | 74.675 | 104.054 | 86.230 | 0.00 | 0.00 |
| ATOM | 27362 | HA   | ILE | 1821 | 74.549 | 103.089 | 85.740 | 0.00 | 0.00 |
| ATOM | 27363 | CB   | ILE | 1821 | 73.945 | 105.288 | 85.504 | 0.00 | 0.00 |
| ATOM | 27364 | HB   | ILE | 1821 | 74.043 | 106.035 | 86.293 | 0.00 | 0.00 |
| ATOM | 27365 | CG2  | ILE | 1821 | 74.679 | 105.894 | 84.315 | 0.00 | 0.00 |
| ATOM | 27366 | 1HG2 | ILE | 1821 | 75.638 | 106.310 | 84.624 | 0.00 | 0.00 |
| ATOM | 27367 | 2HG2 | ILE | 1821 | 74.881 | 105.086 | 83.612 | 0.00 | 0.00 |
| ATOM | 27368 | 3HG2 | ILE | 1821 | 74.209 | 106.782 | 83.892 | 0.00 | 0.00 |
| ATOM | 27369 | CG1  | ILE | 1821 | 72.514 | 104.966 | 85.125 | 0.00 | 0.00 |
| ATOM | 27370 | 2HG1 | ILE | 1821 | 72.497 | 104.190 | 84.359 | 0.00 | 0.00 |
| ATOM | 27371 | 3HG1 | ILE | 1821 | 72.011 | 104.458 | 85.948 | 0.00 | 0.00 |



|      |       |      |     |      |        |         |        |      |      |
|------|-------|------|-----|------|--------|---------|--------|------|------|
| ATOM | 27372 | CD1  | ILE | 1821 | 71.644 | 106.209 | 84.926 | 0.00 | 0.00 |
| ATOM | 27373 | 1HD1 | ILE | 1821 | 71.265 | 106.501 | 85.906 | 0.00 | 0.00 |
| ATOM | 27374 | 2HD1 | ILE | 1821 | 72.165 | 107.059 | 84.485 | 0.00 | 0.00 |
| ATOM | 27375 | 3HD1 | ILE | 1821 | 70.821 | 106.009 | 84.239 | 0.00 | 0.00 |
| ATOM | 27376 | C    | ILE | 1821 | 76.168 | 104.393 | 86.304 | 0.00 | 0.00 |
| ATOM | 27377 | O    | ILE | 1821 | 76.711 | 105.240 | 86.976 | 0.00 | 0.00 |
| ATOM | 27378 | N    | VAL | 1822 | 76.892 | 103.660 | 85.495 | 0.00 | 0.00 |
| ATOM | 27379 | H    | VAL | 1822 | 76.442 | 103.051 | 84.826 | 0.00 | 0.00 |
| ATOM | 27380 | CA   | VAL | 1822 | 78.238 | 104.087 | 85.040 | 0.00 | 0.00 |
| ATOM | 27381 | HA   | VAL | 1822 | 78.494 | 105.031 | 85.519 | 0.00 | 0.00 |
| ATOM | 27382 | CB   | VAL | 1822 | 79.328 | 102.985 | 85.584 | 0.00 | 0.00 |
| ATOM | 27383 | HB   | VAL | 1822 | 78.969 | 101.977 | 85.375 | 0.00 | 0.00 |
| ATOM | 27384 | CG1  | VAL | 1822 | 80.781 | 103.266 | 85.038 | 0.00 | 0.00 |
| ATOM | 27385 | 1HG1 | VAL | 1822 | 81.494 | 102.616 | 85.545 | 0.00 | 0.00 |
| ATOM | 27386 | 2HG1 | VAL | 1822 | 80.821 | 103.046 | 83.971 | 0.00 | 0.00 |
| ATOM | 27387 | 3HG1 | VAL | 1822 | 81.074 | 104.307 | 85.170 | 0.00 | 0.00 |
| ATOM | 27388 | CG2  | VAL | 1822 | 79.437 | 103.085 | 87.112 | 0.00 | 0.00 |
| ATOM | 27389 | 1HG2 | VAL | 1822 | 80.107 | 102.305 | 87.474 | 0.00 | 0.00 |
| ATOM | 27390 | 2HG2 | VAL | 1822 | 79.741 | 104.086 | 87.417 | 0.00 | 0.00 |
| ATOM | 27391 | 3HG2 | VAL | 1822 | 78.447 | 103.081 | 87.569 | 0.00 | 0.00 |
| ATOM | 27392 | C    | VAL | 1822 | 78.304 | 104.337 | 83.591 | 0.00 | 0.00 |
| ATOM | 27393 | O    | VAL | 1822 | 78.242 | 103.455 | 82.726 | 0.00 | 0.00 |
| ATOM | 27394 | N    | ASP | 1823 | 78.625 | 105.583 | 83.217 | 0.00 | 0.00 |
| ATOM | 27395 | H    | ASP | 1823 | 78.607 | 106.331 | 83.895 | 0.00 | 0.00 |
| ATOM | 27396 | CA   | ASP | 1823 | 78.644 | 106.034 | 81.781 | 0.00 | 0.00 |
| ATOM | 27397 | HA   | ASP | 1823 | 78.921 | 105.222 | 81.108 | 0.00 | 0.00 |

|      |       |     |     |      |        |         |        |      |      |
|------|-------|-----|-----|------|--------|---------|--------|------|------|
| ATOM | 27398 | CB  | ASP | 1823 | 77.237 | 106.381 | 81.428 | 0.00 | 0.00 |
| ATOM | 27399 | HB2 | ASP | 1823 | 77.021 | 107.443 | 81.545 | 0.00 | 0.00 |
| ATOM | 27400 | HB3 | ASP | 1823 | 76.601 | 105.797 | 82.093 | 0.00 | 0.00 |
| ATOM | 27401 | CG  | ASP | 1823 | 76.904 | 106.093 | 79.927 | 0.00 | 0.00 |
| ATOM | 27402 | OD1 | ASP | 1823 | 77.741 | 105.464 | 79.183 | 0.00 | 0.00 |
| ATOM | 27403 | OD2 | ASP | 1823 | 75.748 | 106.310 | 79.459 | 0.00 | 0.00 |
| ATOM | 27404 | C   | ASP | 1823 | 79.544 | 107.306 | 81.580 | 0.00 | 0.00 |
| ATOM | 27405 | O   | ASP | 1823 | 79.971 | 108.001 | 82.509 | 0.00 | 0.00 |
| ATOM | 27406 | N   | HIE | 1824 | 79.793 | 107.582 | 80.339 | 0.00 | 0.00 |
| ATOM | 27407 | H   | HIE | 1824 | 79.436 | 107.042 | 79.563 | 0.00 | 0.00 |
| ATOM | 27408 | CA  | HIE | 1824 | 80.827 | 108.572 | 80.075 | 0.00 | 0.00 |
| ATOM | 27409 | HA  | HIE | 1824 | 81.761 | 108.316 | 80.576 | 0.00 | 0.00 |
| ATOM | 27410 | CB  | HIE | 1824 | 81.130 | 108.512 | 78.595 | 0.00 | 0.00 |
| ATOM | 27411 | HB2 | HIE | 1824 | 82.044 | 109.079 | 78.418 | 0.00 | 0.00 |
| ATOM | 27412 | HB3 | HIE | 1824 | 81.392 | 107.477 | 78.379 | 0.00 | 0.00 |
| ATOM | 27413 | CG  | HIE | 1824 | 80.057 | 108.973 | 77.576 | 0.00 | 0.00 |
| ATOM | 27414 | ND1 | HIE | 1824 | 79.888 | 110.226 | 77.042 | 0.00 | 0.00 |
| ATOM | 27415 | CE1 | HIE | 1824 | 78.782 | 110.243 | 76.227 | 0.00 | 0.00 |
| ATOM | 27416 | HE1 | HIE | 1824 | 78.380 | 111.123 | 75.747 | 0.00 | 0.00 |
| ATOM | 27417 | NE2 | HIE | 1824 | 78.190 | 109.071 | 76.257 | 0.00 | 0.00 |
| ATOM | 27418 | HE2 | HIE | 1824 | 77.336 | 108.756 | 75.821 | 0.00 | 0.00 |
| ATOM | 27419 | CD2 | HIE | 1824 | 78.982 | 108.242 | 77.075 | 0.00 | 0.00 |
| ATOM | 27420 | HD2 | HIE | 1824 | 78.673 | 107.230 | 77.293 | 0.00 | 0.00 |
| ATOM | 27421 | C   | HIE | 1824 | 80.426 | 109.984 | 80.576 | 0.00 | 0.00 |
| ATOM | 27422 | O   | HIE | 1824 | 81.303 | 110.800 | 80.774 | 0.00 | 0.00 |
| ATOM | 27423 | N   | TRP | 1825 | 79.155 | 110.294 | 80.893 | 0.00 | 0.00 |

|      |       |     |     |      |        |         |        |      |      |
|------|-------|-----|-----|------|--------|---------|--------|------|------|
| ATOM | 27424 | H   | TRP | 1825 | 78.522 | 109.523 | 80.735 | 0.00 | 0.00 |
| ATOM | 27425 | CA  | TRP | 1825 | 78.652 | 111.633 | 81.398 | 0.00 | 0.00 |
| ATOM | 27426 | HA  | TRP | 1825 | 79.371 | 112.444 | 81.279 | 0.00 | 0.00 |
| ATOM | 27427 | CB  | TRP | 1825 | 77.533 | 112.045 | 80.415 | 0.00 | 0.00 |
| ATOM | 27428 | HB2 | TRP | 1825 | 77.149 | 113.033 | 80.668 | 0.00 | 0.00 |
| ATOM | 27429 | HB3 | TRP | 1825 | 77.847 | 112.157 | 79.377 | 0.00 | 0.00 |
| ATOM | 27430 | CG  | TRP | 1825 | 76.413 | 110.975 | 80.354 | 0.00 | 0.00 |
| ATOM | 27431 | CD1 | TRP | 1825 | 76.328 | 109.910 | 79.430 | 0.00 | 0.00 |
| ATOM | 27432 | HD1 | TRP | 1825 | 76.979 | 109.805 | 78.575 | 0.00 | 0.00 |
| ATOM | 27433 | NE1 | TRP | 1825 | 75.326 | 108.944 | 79.889 | 0.00 | 0.00 |
| ATOM | 27434 | HE1 | TRP | 1825 | 75.237 | 108.047 | 79.433 | 0.00 | 0.00 |
| ATOM | 27435 | CE2 | TRP | 1825 | 74.703 | 109.413 | 81.037 | 0.00 | 0.00 |
| ATOM | 27436 | CZ2 | TRP | 1825 | 73.656 | 108.812 | 81.811 | 0.00 | 0.00 |
| ATOM | 27437 | HZ2 | TRP | 1825 | 73.251 | 107.848 | 81.538 | 0.00 | 0.00 |
| ATOM | 27438 | CH2 | TRP | 1825 | 73.161 | 109.438 | 82.943 | 0.00 | 0.00 |
| ATOM | 27439 | HH2 | TRP | 1825 | 72.338 | 108.992 | 83.482 | 0.00 | 0.00 |
| ATOM | 27440 | CZ3 | TRP | 1825 | 73.657 | 110.713 | 83.199 | 0.00 | 0.00 |
| ATOM | 27441 | HZ3 | TRP | 1825 | 73.197 | 111.260 | 84.009 | 0.00 | 0.00 |
| ATOM | 27442 | CE3 | TRP | 1825 | 74.705 | 111.318 | 82.449 | 0.00 | 0.00 |
| ATOM | 27443 | HE3 | TRP | 1825 | 75.093 | 112.307 | 82.642 | 0.00 | 0.00 |
| ATOM | 27444 | CD2 | TRP | 1825 | 75.338 | 110.681 | 81.324 | 0.00 | 0.00 |
| ATOM | 27445 | C   | TRP | 1825 | 78.238 | 111.726 | 82.893 | 0.00 | 0.00 |
| ATOM | 27446 | O   | TRP | 1825 | 77.747 | 112.768 | 83.297 | 0.00 | 0.00 |
| ATOM | 27447 | N   | GLY | 1826 | 78.466 | 110.619 | 83.646 | 0.00 | 0.00 |
| ATOM | 27448 | H   | GLY | 1826 | 78.761 | 109.843 | 83.070 | 0.00 | 0.00 |
| ATOM | 27449 | CA  | GLY | 1826 | 78.240 | 110.541 | 85.103 | 0.00 | 0.00 |

|      |       |      |     |      |        |         |        |      |      |
|------|-------|------|-----|------|--------|---------|--------|------|------|
| ATOM | 27450 | HA2  | GLY | 1826 | 79.087 | 111.138 | 85.440 | 0.00 | 0.00 |
| ATOM | 27451 | HA3  | GLY | 1826 | 77.329 | 111.078 | 85.370 | 0.00 | 0.00 |
| ATOM | 27452 | C    | GLY | 1826 | 78.162 | 109.156 | 85.765 | 0.00 | 0.00 |
| ATOM | 27453 | O    | GLY | 1826 | 78.122 | 108.129 | 85.106 | 0.00 | 0.00 |
| ATOM | 27454 | N    | ILE | 1827 | 78.233 | 109.146 | 87.133 | 0.00 | 0.00 |
| ATOM | 27455 | H    | ILE | 1827 | 78.464 | 110.053 | 87.513 | 0.00 | 0.00 |
| ATOM | 27456 | CA   | ILE | 1827 | 77.955 | 108.123 | 88.118 | 0.00 | 0.00 |
| ATOM | 27457 | HA   | ILE | 1827 | 77.791 | 107.186 | 87.586 | 0.00 | 0.00 |
| ATOM | 27458 | CB   | ILE | 1827 | 79.216 | 107.998 | 88.979 | 0.00 | 0.00 |
| ATOM | 27459 | HB   | ILE | 1827 | 79.543 | 108.999 | 89.258 | 0.00 | 0.00 |
| ATOM | 27460 | CG2  | ILE | 1827 | 78.872 | 107.226 | 90.227 | 0.00 | 0.00 |
| ATOM | 27461 | 1HG2 | ILE | 1827 | 78.027 | 107.677 | 90.746 | 0.00 | 0.00 |
| ATOM | 27462 | 2HG2 | ILE | 1827 | 78.641 | 106.192 | 89.972 | 0.00 | 0.00 |
| ATOM | 27463 | 3HG2 | ILE | 1827 | 79.731 | 107.256 | 90.897 | 0.00 | 0.00 |
| ATOM | 27464 | CG1  | ILE | 1827 | 80.418 | 107.194 | 88.345 | 0.00 | 0.00 |
| ATOM | 27465 | 2HG1 | ILE | 1827 | 80.993 | 106.679 | 89.115 | 0.00 | 0.00 |
| ATOM | 27466 | 3HG1 | ILE | 1827 | 79.922 | 106.358 | 87.852 | 0.00 | 0.00 |
| ATOM | 27467 | CD1  | ILE | 1827 | 81.383 | 107.826 | 87.258 | 0.00 | 0.00 |
| ATOM | 27468 | 1HD1 | ILE | 1827 | 81.824 | 106.931 | 86.820 | 0.00 | 0.00 |
| ATOM | 27469 | 2HD1 | ILE | 1827 | 80.816 | 108.157 | 86.389 | 0.00 | 0.00 |
| ATOM | 27470 | 3HD1 | ILE | 1827 | 82.162 | 108.430 | 87.724 | 0.00 | 0.00 |
| ATOM | 27471 | C    | ILE | 1827 | 76.700 | 108.647 | 88.894 | 0.00 | 0.00 |
| ATOM | 27472 | O    | ILE | 1827 | 76.807 | 109.387 | 89.854 | 0.00 | 0.00 |
| ATOM | 27473 | N    | VAL | 1828 | 75.526 | 108.516 | 88.282 | 0.00 | 0.00 |
| ATOM | 27474 | H    | VAL | 1828 | 75.569 | 108.068 | 87.377 | 0.00 | 0.00 |
| ATOM | 27475 | CA   | VAL | 1828 | 74.192 | 108.921 | 88.814 | 0.00 | 0.00 |

|      |       |      |     |      |        |         |        |      |      |
|------|-------|------|-----|------|--------|---------|--------|------|------|
| ATOM | 27476 | HA   | VAL | 1828 | 74.417 | 109.298 | 89.812 | 0.00 | 0.00 |
| ATOM | 27477 | CB   | VAL | 1828 | 73.595 | 110.146 | 88.069 | 0.00 | 0.00 |
| ATOM | 27478 | HB   | VAL | 1828 | 72.710 | 110.554 | 88.555 | 0.00 | 0.00 |
| ATOM | 27479 | CG1  | VAL | 1828 | 74.606 | 111.314 | 87.865 | 0.00 | 0.00 |
| ATOM | 27480 | 1HG1 | VAL | 1828 | 75.490 | 110.911 | 87.370 | 0.00 | 0.00 |
| ATOM | 27481 | 2HG1 | VAL | 1828 | 74.021 | 112.125 | 87.433 | 0.00 | 0.00 |
| ATOM | 27482 | 3HG1 | VAL | 1828 | 74.949 | 111.641 | 88.846 | 0.00 | 0.00 |
| ATOM | 27483 | CG2  | VAL | 1828 | 73.147 | 109.675 | 86.663 | 0.00 | 0.00 |
| ATOM | 27484 | 1HG2 | VAL | 1828 | 72.502 | 110.441 | 86.232 | 0.00 | 0.00 |
| ATOM | 27485 | 2HG2 | VAL | 1828 | 74.083 | 109.501 | 86.133 | 0.00 | 0.00 |
| ATOM | 27486 | 3HG2 | VAL | 1828 | 72.508 | 108.794 | 86.734 | 0.00 | 0.00 |
| ATOM | 27487 | C    | VAL | 1828 | 73.256 | 107.790 | 89.222 | 0.00 | 0.00 |
| ATOM | 27488 | O    | VAL | 1828 | 73.045 | 106.867 | 88.428 | 0.00 | 0.00 |
| ATOM | 27489 | N    | LYS | 1829 | 72.573 | 107.938 | 90.353 | 0.00 | 0.00 |
| ATOM | 27490 | H    | LYS | 1829 | 72.637 | 108.743 | 90.959 | 0.00 | 0.00 |
| ATOM | 27491 | CA   | LYS | 1829 | 71.718 | 106.847 | 90.856 | 0.00 | 0.00 |
| ATOM | 27492 | HA   | LYS | 1829 | 71.913 | 105.875 | 90.402 | 0.00 | 0.00 |
| ATOM | 27493 | CB   | LYS | 1829 | 71.830 | 106.758 | 92.413 | 0.00 | 0.00 |
| ATOM | 27494 | HB2  | LYS | 1829 | 72.832 | 106.818 | 92.838 | 0.00 | 0.00 |
| ATOM | 27495 | HB3  | LYS | 1829 | 71.313 | 107.622 | 92.831 | 0.00 | 0.00 |
| ATOM | 27496 | CG   | LYS | 1829 | 71.148 | 105.508 | 93.045 | 0.00 | 0.00 |
| ATOM | 27497 | HG2  | LYS | 1829 | 71.546 | 104.539 | 92.745 | 0.00 | 0.00 |
| ATOM | 27498 | HG3  | LYS | 1829 | 71.501 | 105.538 | 94.076 | 0.00 | 0.00 |
| ATOM | 27499 | CD   | LYS | 1829 | 69.658 | 105.361 | 93.050 | 0.00 | 0.00 |
| ATOM | 27500 | HD2  | LYS | 1829 | 69.140 | 106.216 | 92.615 | 0.00 | 0.00 |
| ATOM | 27501 | HD3  | LYS | 1829 | 69.504 | 104.561 | 92.326 | 0.00 | 0.00 |

|      |       |     |     |      |        |         |        |      |      |
|------|-------|-----|-----|------|--------|---------|--------|------|------|
| ATOM | 27502 | CE  | LYS | 1829 | 69.056 | 105.102 | 94.422 | 0.00 | 0.00 |
| ATOM | 27503 | HE2 | LYS | 1829 | 67.968 | 105.041 | 94.432 | 0.00 | 0.00 |
| ATOM | 27504 | HE3 | LYS | 1829 | 69.526 | 104.168 | 94.731 | 0.00 | 0.00 |
| ATOM | 27505 | NZ  | LYS | 1829 | 69.436 | 106.154 | 95.352 | 0.00 | 0.00 |
| ATOM | 27506 | HZ1 | LYS | 1829 | 69.395 | 107.111 | 95.033 | 0.00 | 0.00 |
| ATOM | 27507 | HZ2 | LYS | 1829 | 68.947 | 106.073 | 96.232 | 0.00 | 0.00 |
| ATOM | 27508 | HZ3 | LYS | 1829 | 70.391 | 106.108 | 95.677 | 0.00 | 0.00 |
| ATOM | 27509 | C   | LYS | 1829 | 70.304 | 107.172 | 90.351 | 0.00 | 0.00 |
| ATOM | 27510 | O   | LYS | 1829 | 69.797 | 108.265 | 90.604 | 0.00 | 0.00 |
| ATOM | 27511 | N   | ALA | 1830 | 69.509 | 106.235 | 89.706 | 0.00 | 0.00 |
| ATOM | 27512 | H   | ALA | 1830 | 69.899 | 105.303 | 89.728 | 0.00 | 0.00 |
| ATOM | 27513 | CA  | ALA | 1830 | 68.255 | 106.483 | 89.070 | 0.00 | 0.00 |
| ATOM | 27514 | HA  | ALA | 1830 | 67.789 | 107.316 | 89.596 | 0.00 | 0.00 |
| ATOM | 27515 | CB  | ALA | 1830 | 68.563 | 106.948 | 87.644 | 0.00 | 0.00 |
| ATOM | 27516 | HB1 | ALA | 1830 | 69.280 | 107.769 | 87.674 | 0.00 | 0.00 |
| ATOM | 27517 | HB2 | ALA | 1830 | 69.022 | 106.160 | 87.048 | 0.00 | 0.00 |
| ATOM | 27518 | HB3 | ALA | 1830 | 67.697 | 107.447 | 87.208 | 0.00 | 0.00 |
| ATOM | 27519 | C   | ALA | 1830 | 67.326 | 105.293 | 88.984 | 0.00 | 0.00 |
| ATOM | 27520 | O   | ALA | 1830 | 67.687 | 104.203 | 89.374 | 0.00 | 0.00 |
| ATOM | 27521 | N   | ASP | 1831 | 66.118 | 105.480 | 88.432 | 0.00 | 0.00 |
| ATOM | 27522 | H   | ASP | 1831 | 65.800 | 106.421 | 88.249 | 0.00 | 0.00 |
| ATOM | 27523 | CA  | ASP | 1831 | 65.390 | 104.420 | 87.736 | 0.00 | 0.00 |
| ATOM | 27524 | HA  | ASP | 1831 | 65.894 | 103.462 | 87.862 | 0.00 | 0.00 |
| ATOM | 27525 | CB  | ASP | 1831 | 63.910 | 104.393 | 88.087 | 0.00 | 0.00 |
| ATOM | 27526 | HB2 | ASP | 1831 | 63.359 | 105.239 | 87.677 | 0.00 | 0.00 |
| ATOM | 27527 | HB3 | ASP | 1831 | 63.420 | 103.451 | 87.841 | 0.00 | 0.00 |

|      |       |      |     |      |        |         |        |      |      |
|------|-------|------|-----|------|--------|---------|--------|------|------|
| ATOM | 27528 | CG   | ASP | 1831 | 63.629 | 104.255 | 89.563 | 0.00 | 0.00 |
| ATOM | 27529 | OD1  | ASP | 1831 | 62.951 | 105.230 | 90.048 | 0.00 | 0.00 |
| ATOM | 27530 | OD2  | ASP | 1831 | 63.970 | 103.269 | 90.302 | 0.00 | 0.00 |
| ATOM | 27531 | C    | ASP | 1831 | 65.631 | 104.709 | 86.229 | 0.00 | 0.00 |
| ATOM | 27532 | O    | ASP | 1831 | 65.947 | 105.877 | 85.865 | 0.00 | 0.00 |
| ATOM | 27533 | N    | ILE | 1832 | 65.389 | 103.651 | 85.385 | 0.00 | 0.00 |
| ATOM | 27534 | H    | ILE | 1832 | 65.134 | 102.756 | 85.778 | 0.00 | 0.00 |
| ATOM | 27535 | CA   | ILE | 1832 | 65.501 | 103.620 | 83.930 | 0.00 | 0.00 |
| ATOM | 27536 | HA   | ILE | 1832 | 65.420 | 104.690 | 83.736 | 0.00 | 0.00 |
| ATOM | 27537 | CB   | ILE | 1832 | 66.935 | 103.160 | 83.441 | 0.00 | 0.00 |
| ATOM | 27538 | HB   | ILE | 1832 | 67.031 | 102.104 | 83.692 | 0.00 | 0.00 |
| ATOM | 27539 | CG2  | ILE | 1832 | 67.093 | 103.245 | 81.842 | 0.00 | 0.00 |
| ATOM | 27540 | 1HG2 | ILE | 1832 | 66.431 | 102.572 | 81.297 | 0.00 | 0.00 |
| ATOM | 27541 | 2HG2 | ILE | 1832 | 66.694 | 104.211 | 81.532 | 0.00 | 0.00 |
| ATOM | 27542 | 3HG2 | ILE | 1832 | 68.128 | 103.099 | 81.531 | 0.00 | 0.00 |
| ATOM | 27543 | CG1  | ILE | 1832 | 68.182 | 103.861 | 84.152 | 0.00 | 0.00 |
| ATOM | 27544 | 2HG1 | ILE | 1832 | 69.022 | 103.797 | 83.460 | 0.00 | 0.00 |
| ATOM | 27545 | 3HG1 | ILE | 1832 | 67.911 | 104.904 | 84.315 | 0.00 | 0.00 |
| ATOM | 27546 | CD1  | ILE | 1832 | 68.697 | 103.330 | 85.449 | 0.00 | 0.00 |
| ATOM | 27547 | 1HD1 | ILE | 1832 | 69.084 | 102.319 | 85.327 | 0.00 | 0.00 |
| ATOM | 27548 | 2HD1 | ILE | 1832 | 69.577 | 103.916 | 85.715 | 0.00 | 0.00 |
| ATOM | 27549 | 3HD1 | ILE | 1832 | 68.045 | 103.289 | 86.321 | 0.00 | 0.00 |
| ATOM | 27550 | C    | ILE | 1832 | 64.378 | 102.918 | 83.111 | 0.00 | 0.00 |
| ATOM | 27551 | O    | ILE | 1832 | 64.111 | 101.682 | 83.200 | 0.00 | 0.00 |
| ATOM | 27552 | N    | GLY | 1833 | 63.690 | 103.750 | 82.336 | 0.00 | 0.00 |
| ATOM | 27553 | H    | GLY | 1833 | 64.114 | 104.654 | 82.180 | 0.00 | 0.00 |

|      |       |      |     |      |        |         |        |      |      |
|------|-------|------|-----|------|--------|---------|--------|------|------|
| ATOM | 27554 | CA   | GLY | 1833 | 62.517 | 103.434 | 81.579 | 0.00 | 0.00 |
| ATOM | 27555 | HA2  | GLY | 1833 | 61.895 | 102.668 | 82.041 | 0.00 | 0.00 |
| ATOM | 27556 | HA3  | GLY | 1833 | 61.790 | 104.245 | 81.610 | 0.00 | 0.00 |
| ATOM | 27557 | C    | GLY | 1833 | 62.827 | 103.107 | 80.083 | 0.00 | 0.00 |
| ATOM | 27558 | O    | GLY | 1833 | 63.512 | 103.861 | 79.403 | 0.00 | 0.00 |
| ATOM | 27559 | N    | VAL | 1834 | 62.190 | 102.073 | 79.571 | 0.00 | 0.00 |
| ATOM | 27560 | H    | VAL | 1834 | 61.610 | 101.534 | 80.198 | 0.00 | 0.00 |
| ATOM | 27561 | CA   | VAL | 1834 | 62.426 | 101.464 | 78.283 | 0.00 | 0.00 |
| ATOM | 27562 | HA   | VAL | 1834 | 63.116 | 102.099 | 77.727 | 0.00 | 0.00 |
| ATOM | 27563 | CB   | VAL | 1834 | 63.077 | 100.091 | 78.399 | 0.00 | 0.00 |
| ATOM | 27564 | HB   | VAL | 1834 | 62.347 | 99.460  | 78.906 | 0.00 | 0.00 |
| ATOM | 27565 | CG1  | VAL | 1834 | 63.223 | 99.403  | 77.085 | 0.00 | 0.00 |
| ATOM | 27566 | 1HG1 | VAL | 1834 | 62.249 | 99.325  | 76.601 | 0.00 | 0.00 |
| ATOM | 27567 | 2HG1 | VAL | 1834 | 63.863 | 100.009 | 76.444 | 0.00 | 0.00 |
| ATOM | 27568 | 3HG1 | VAL | 1834 | 63.653 | 98.444  | 77.374 | 0.00 | 0.00 |
| ATOM | 27569 | CG2  | VAL | 1834 | 64.453 | 100.037 | 79.120 | 0.00 | 0.00 |
| ATOM | 27570 | 1HG2 | VAL | 1834 | 64.793 | 99.004  | 79.053 | 0.00 | 0.00 |
| ATOM | 27571 | 2HG2 | VAL | 1834 | 65.246 | 100.628 | 78.662 | 0.00 | 0.00 |
| ATOM | 27572 | 3HG2 | VAL | 1834 | 64.389 | 100.268 | 80.184 | 0.00 | 0.00 |
| ATOM | 27573 | C    | VAL | 1834 | 61.113 | 101.339 | 77.519 | 0.00 | 0.00 |
| ATOM | 27574 | O    | VAL | 1834 | 60.194 | 100.735 | 78.035 | 0.00 | 0.00 |
| ATOM | 27575 | N    | LYS | 1835 | 60.971 | 101.894 | 76.288 | 0.00 | 0.00 |
| ATOM | 27576 | H    | LYS | 1835 | 61.773 | 102.394 | 75.932 | 0.00 | 0.00 |
| ATOM | 27577 | CA   | LYS | 1835 | 59.738 | 101.648 | 75.482 | 0.00 | 0.00 |
| ATOM | 27578 | HA   | LYS | 1835 | 59.119 | 100.869 | 75.930 | 0.00 | 0.00 |
| ATOM | 27579 | CB   | LYS | 1835 | 58.962 | 102.945 | 75.342 | 0.00 | 0.00 |



|      |       |     |     |      |        |         |        |      |      |
|------|-------|-----|-----|------|--------|---------|--------|------|------|
| ATOM | 27580 | HB2 | LYS | 1835 | 58.778 | 103.379 | 76.324 | 0.00 | 0.00 |
| ATOM | 27581 | HB3 | LYS | 1835 | 59.569 | 103.591 | 74.708 | 0.00 | 0.00 |
| ATOM | 27582 | CG  | LYS | 1835 | 57.624 | 102.789 | 74.659 | 0.00 | 0.00 |
| ATOM | 27583 | HG2 | LYS | 1835 | 57.385 | 103.722 | 74.149 | 0.00 | 0.00 |
| ATOM | 27584 | HG3 | LYS | 1835 | 57.631 | 102.061 | 73.847 | 0.00 | 0.00 |
| ATOM | 27585 | CD  | LYS | 1835 | 56.555 | 102.368 | 75.677 | 0.00 | 0.00 |
| ATOM | 27586 | HD2 | LYS | 1835 | 56.830 | 101.498 | 76.274 | 0.00 | 0.00 |
| ATOM | 27587 | HD3 | LYS | 1835 | 56.339 | 103.171 | 76.382 | 0.00 | 0.00 |
| ATOM | 27588 | CE  | LYS | 1835 | 55.288 | 102.040 | 75.001 | 0.00 | 0.00 |
| ATOM | 27589 | HE2 | LYS | 1835 | 54.727 | 102.895 | 74.624 | 0.00 | 0.00 |
| ATOM | 27590 | HE3 | LYS | 1835 | 55.436 | 101.561 | 74.033 | 0.00 | 0.00 |
| ATOM | 27591 | NZ  | LYS | 1835 | 54.508 | 101.160 | 75.891 | 0.00 | 0.00 |
| ATOM | 27592 | HZ1 | LYS | 1835 | 54.852 | 100.210 | 75.874 | 0.00 | 0.00 |
| ATOM | 27593 | HZ2 | LYS | 1835 | 54.694 | 101.565 | 76.797 | 0.00 | 0.00 |
| ATOM | 27594 | HZ3 | LYS | 1835 | 53.502 | 101.079 | 75.846 | 0.00 | 0.00 |
| ATOM | 27595 | C   | LYS | 1835 | 60.260 | 101.196 | 74.079 | 0.00 | 0.00 |
| ATOM | 27596 | O   | LYS | 1835 | 61.256 | 101.741 | 73.647 | 0.00 | 0.00 |
| ATOM | 27597 | N   | ASP | 1836 | 59.715 | 100.169 | 73.489 | 0.00 | 0.00 |
| ATOM | 27598 | H   | ASP | 1836 | 58.902 | 99.769  | 73.935 | 0.00 | 0.00 |
| ATOM | 27599 | CA  | ASP | 1836 | 60.081 | 99.609  | 72.206 | 0.00 | 0.00 |
| ATOM | 27600 | HA  | ASP | 1836 | 59.455 | 98.733  | 72.035 | 0.00 | 0.00 |
| ATOM | 27601 | CB  | ASP | 1836 | 59.781 | 100.686 | 71.080 | 0.00 | 0.00 |
| ATOM | 27602 | HB2 | ASP | 1836 | 58.874 | 101.265 | 71.251 | 0.00 | 0.00 |
| ATOM | 27603 | HB3 | ASP | 1836 | 60.613 | 101.390 | 71.040 | 0.00 | 0.00 |
| ATOM | 27604 | CG  | ASP | 1836 | 59.505 | 99.937  | 69.765 | 0.00 | 0.00 |
| ATOM | 27605 | OD1 | ASP | 1836 | 58.813 | 98.884  | 69.737 | 0.00 | 0.00 |

|      |       |     |     |      |        |         |        |      |      |
|------|-------|-----|-----|------|--------|---------|--------|------|------|
| ATOM | 27606 | OD2 | ASP | 1836 | 60.084 | 100.384 | 68.724 | 0.00 | 0.00 |
| ATOM | 27607 | C   | ASP | 1836 | 61.507 | 99.182  | 72.140 | 0.00 | 0.00 |
| ATOM | 27608 | O   | ASP | 1836 | 62.137 | 99.385  | 71.109 | 0.00 | 0.00 |
| ATOM | 27609 | N   | GLY | 1837 | 61.968 | 98.551  | 73.255 | 0.00 | 0.00 |
| ATOM | 27610 | H   | GLY | 1837 | 61.368 | 98.466  | 74.062 | 0.00 | 0.00 |
| ATOM | 27611 | CA  | GLY | 1837 | 63.293 | 98.026  | 73.437 | 0.00 | 0.00 |
| ATOM | 27612 | HA2 | GLY | 1837 | 63.383 | 97.531  | 74.404 | 0.00 | 0.00 |
| ATOM | 27613 | HA3 | GLY | 1837 | 63.408 | 97.378  | 72.568 | 0.00 | 0.00 |
| ATOM | 27614 | C   | GLY | 1837 | 64.307 | 99.104  | 73.428 | 0.00 | 0.00 |
| ATOM | 27615 | O   | GLY | 1837 | 65.502 | 98.792  | 73.324 | 0.00 | 0.00 |
| ATOM | 27616 | N   | ARG | 1838 | 63.922 | 100.427 | 73.452 | 0.00 | 0.00 |
| ATOM | 27617 | H   | ARG | 1838 | 62.942 | 100.622 | 73.307 | 0.00 | 0.00 |
| ATOM | 27618 | CA  | ARG | 1838 | 64.744 | 101.699 | 73.444 | 0.00 | 0.00 |
| ATOM | 27619 | HA  | ARG | 1838 | 65.792 | 101.401 | 73.402 | 0.00 | 0.00 |
| ATOM | 27620 | CB  | ARG | 1838 | 64.529 | 102.676 | 72.220 | 0.00 | 0.00 |
| ATOM | 27621 | HB2 | ARG | 1838 | 63.479 | 102.931 | 72.079 | 0.00 | 0.00 |
| ATOM | 27622 | HB3 | ARG | 1838 | 64.984 | 103.660 | 72.337 | 0.00 | 0.00 |
| ATOM | 27623 | CG  | ARG | 1838 | 65.172 | 102.026 | 70.971 | 0.00 | 0.00 |
| ATOM | 27624 | HG2 | ARG | 1838 | 66.210 | 101.737 | 71.138 | 0.00 | 0.00 |
| ATOM | 27625 | HG3 | ARG | 1838 | 64.616 | 101.100 | 70.825 | 0.00 | 0.00 |
| ATOM | 27626 | CD  | ARG | 1838 | 65.034 | 102.907 | 69.716 | 0.00 | 0.00 |
| ATOM | 27627 | HD2 | ARG | 1838 | 63.972 | 103.100 | 69.561 | 0.00 | 0.00 |
| ATOM | 27628 | HD3 | ARG | 1838 | 65.546 | 103.844 | 69.930 | 0.00 | 0.00 |
| ATOM | 27629 | NE  | ARG | 1838 | 65.688 | 102.343 | 68.517 | 0.00 | 0.00 |
| ATOM | 27630 | HE  | ARG | 1838 | 65.151 | 101.607 | 68.082 | 0.00 | 0.00 |
| ATOM | 27631 | CZ  | ARG | 1838 | 66.750 | 102.776 | 67.913 | 0.00 | 0.00 |

|      |       |      |     |      |        |         |        |      |      |
|------|-------|------|-----|------|--------|---------|--------|------|------|
| ATOM | 27632 | NH1  | ARG | 1838 | 67.249 | 102.129 | 66.827 | 0.00 | 0.00 |
| ATOM | 27633 | 1HH1 | ARG | 1838 | 67.876 | 102.653 | 66.233 | 0.00 | 0.00 |
| ATOM | 27634 | 2HH1 | ARG | 1838 | 66.778 | 101.318 | 66.452 | 0.00 | 0.00 |
| ATOM | 27635 | NH2  | ARG | 1838 | 67.404 | 103.891 | 68.048 | 0.00 | 0.00 |
| ATOM | 27636 | 1HH2 | ARG | 1838 | 68.224 | 104.062 | 67.483 | 0.00 | 0.00 |
| ATOM | 27637 | 2HH2 | ARG | 1838 | 67.204 | 104.408 | 68.892 | 0.00 | 0.00 |
| ATOM | 27638 | C    | ARG | 1838 | 64.702 | 102.490 | 74.712 | 0.00 | 0.00 |
| ATOM | 27639 | O    | ARG | 1838 | 63.715 | 102.529 | 75.442 | 0.00 | 0.00 |
| ATOM | 27640 | N    | ILE | 1839 | 65.757 | 103.191 | 75.124 | 0.00 | 0.00 |
| ATOM | 27641 | H    | ILE | 1839 | 66.584 | 103.209 | 74.545 | 0.00 | 0.00 |
| ATOM | 27642 | CA   | ILE | 1839 | 65.901 | 104.007 | 76.301 | 0.00 | 0.00 |
| ATOM | 27643 | HA   | ILE | 1839 | 65.516 | 103.366 | 77.094 | 0.00 | 0.00 |
| ATOM | 27644 | CB   | ILE | 1839 | 67.366 | 104.398 | 76.503 | 0.00 | 0.00 |
| ATOM | 27645 | HB   | ILE | 1839 | 67.755 | 104.903 | 75.619 | 0.00 | 0.00 |
| ATOM | 27646 | CG2  | ILE | 1839 | 67.484 | 105.221 | 77.832 | 0.00 | 0.00 |
| ATOM | 27647 | 1HG2 | ILE | 1839 | 66.737 | 106.011 | 77.908 | 0.00 | 0.00 |
| ATOM | 27648 | 2HG2 | ILE | 1839 | 67.512 | 104.601 | 78.728 | 0.00 | 0.00 |
| ATOM | 27649 | 3HG2 | ILE | 1839 | 68.425 | 105.768 | 77.781 | 0.00 | 0.00 |
| ATOM | 27650 | CG1  | ILE | 1839 | 68.148 | 103.117 | 76.831 | 0.00 | 0.00 |
| ATOM | 27651 | 2HG1 | ILE | 1839 | 67.722 | 102.705 | 77.746 | 0.00 | 0.00 |
| ATOM | 27652 | 3HG1 | ILE | 1839 | 67.871 | 102.443 | 76.020 | 0.00 | 0.00 |
| ATOM | 27653 | CD1  | ILE | 1839 | 69.637 | 103.341 | 77.098 | 0.00 | 0.00 |
| ATOM | 27654 | 1HD1 | ILE | 1839 | 69.775 | 104.017 | 77.942 | 0.00 | 0.00 |
| ATOM | 27655 | 2HD1 | ILE | 1839 | 70.156 | 102.408 | 77.318 | 0.00 | 0.00 |
| ATOM | 27656 | 3HD1 | ILE | 1839 | 70.051 | 103.820 | 76.211 | 0.00 | 0.00 |
| ATOM | 27657 | C    | ILE | 1839 | 64.947 | 105.269 | 76.235 | 0.00 | 0.00 |

|      |       |     |     |      |        |         |        |      |      |
|------|-------|-----|-----|------|--------|---------|--------|------|------|
| ATOM | 27658 | O   | ILE | 1839 | 65.115 | 106.140 | 75.387 | 0.00 | 0.00 |
| ATOM | 27659 | N   | PHE | 1840 | 63.890 | 105.306 | 77.089 | 0.00 | 0.00 |
| ATOM | 27660 | H   | PHE | 1840 | 63.903 | 104.620 | 77.831 | 0.00 | 0.00 |
| ATOM | 27661 | CA  | PHE | 1840 | 62.784 | 106.237 | 77.139 | 0.00 | 0.00 |
| ATOM | 27662 | HA  | PHE | 1840 | 62.875 | 106.812 | 76.218 | 0.00 | 0.00 |
| ATOM | 27663 | CB  | PHE | 1840 | 61.560 | 105.446 | 77.453 | 0.00 | 0.00 |
| ATOM | 27664 | HB2 | PHE | 1840 | 61.457 | 104.655 | 76.709 | 0.00 | 0.00 |
| ATOM | 27665 | HB3 | PHE | 1840 | 61.639 | 104.931 | 78.410 | 0.00 | 0.00 |
| ATOM | 27666 | CG  | PHE | 1840 | 60.290 | 106.327 | 77.382 | 0.00 | 0.00 |
| ATOM | 27667 | CD1 | PHE | 1840 | 59.631 | 106.554 | 76.165 | 0.00 | 0.00 |
| ATOM | 27668 | HD1 | PHE | 1840 | 59.956 | 106.027 | 75.280 | 0.00 | 0.00 |
| ATOM | 27669 | CE1 | PHE | 1840 | 58.488 | 107.389 | 76.143 | 0.00 | 0.00 |
| ATOM | 27670 | HE1 | PHE | 1840 | 57.993 | 107.732 | 75.246 | 0.00 | 0.00 |
| ATOM | 27671 | CZ  | PHE | 1840 | 58.089 | 108.039 | 77.355 | 0.00 | 0.00 |
| ATOM | 27672 | HZ  | PHE | 1840 | 57.208 | 108.661 | 77.313 | 0.00 | 0.00 |
| ATOM | 27673 | CE2 | PHE | 1840 | 58.861 | 107.902 | 78.581 | 0.00 | 0.00 |
| ATOM | 27674 | HE2 | PHE | 1840 | 58.483 | 108.319 | 79.503 | 0.00 | 0.00 |
| ATOM | 27675 | CD2 | PHE | 1840 | 59.854 | 106.915 | 78.536 | 0.00 | 0.00 |
| ATOM | 27676 | HD2 | PHE | 1840 | 60.449 | 106.783 | 79.427 | 0.00 | 0.00 |
| ATOM | 27677 | C   | PHE | 1840 | 63.050 | 107.445 | 78.051 | 0.00 | 0.00 |
| ATOM | 27678 | O   | PHE | 1840 | 63.148 | 108.613 | 77.664 | 0.00 | 0.00 |
| ATOM | 27679 | N   | ALA | 1841 | 63.378 | 107.038 | 79.265 | 0.00 | 0.00 |
| ATOM | 27680 | H   | ALA | 1841 | 63.307 | 106.072 | 79.552 | 0.00 | 0.00 |
| ATOM | 27681 | CA  | ALA | 1841 | 63.824 | 107.948 | 80.362 | 0.00 | 0.00 |
| ATOM | 27682 | HA  | ALA | 1841 | 64.297 | 108.802 | 79.877 | 0.00 | 0.00 |
| ATOM | 27683 | CB  | ALA | 1841 | 62.586 | 108.653 | 80.999 | 0.00 | 0.00 |

|      |       |      |     |      |        |         |        |      |      |
|------|-------|------|-----|------|--------|---------|--------|------|------|
| ATOM | 27684 | HB1  | ALA | 1841 | 62.144 | 109.290 | 80.233 | 0.00 | 0.00 |
| ATOM | 27685 | HB2  | ALA | 1841 | 61.797 | 107.924 | 81.189 | 0.00 | 0.00 |
| ATOM | 27686 | HB3  | ALA | 1841 | 62.936 | 109.086 | 81.936 | 0.00 | 0.00 |
| ATOM | 27687 | C    | ALA | 1841 | 64.805 | 107.472 | 81.385 | 0.00 | 0.00 |
| ATOM | 27688 | O    | ALA | 1841 | 64.844 | 106.332 | 81.726 | 0.00 | 0.00 |
| ATOM | 27689 | N    | ILE | 1842 | 65.502 | 108.456 | 82.078 | 0.00 | 0.00 |
| ATOM | 27690 | H    | ILE | 1842 | 65.392 | 109.389 | 81.707 | 0.00 | 0.00 |
| ATOM | 27691 | CA   | ILE | 1842 | 66.347 | 108.267 | 83.272 | 0.00 | 0.00 |
| ATOM | 27692 | HA   | ILE | 1842 | 66.381 | 107.240 | 83.634 | 0.00 | 0.00 |
| ATOM | 27693 | CB   | ILE | 1842 | 67.836 | 108.507 | 82.880 | 0.00 | 0.00 |
| ATOM | 27694 | HB   | ILE | 1842 | 67.871 | 109.504 | 82.441 | 0.00 | 0.00 |
| ATOM | 27695 | CG2  | ILE | 1842 | 68.745 | 108.517 | 84.121 | 0.00 | 0.00 |
| ATOM | 27696 | 1HG2 | ILE | 1842 | 68.703 | 107.621 | 84.740 | 0.00 | 0.00 |
| ATOM | 27697 | 2HG2 | ILE | 1842 | 69.777 | 108.638 | 83.792 | 0.00 | 0.00 |
| ATOM | 27698 | 3HG2 | ILE | 1842 | 68.517 | 109.391 | 84.732 | 0.00 | 0.00 |
| ATOM | 27699 | CG1  | ILE | 1842 | 68.332 | 107.417 | 81.914 | 0.00 | 0.00 |
| ATOM | 27700 | 2HG1 | ILE | 1842 | 68.519 | 106.524 | 82.510 | 0.00 | 0.00 |
| ATOM | 27701 | 3HG1 | ILE | 1842 | 67.525 | 106.991 | 81.319 | 0.00 | 0.00 |
| ATOM | 27702 | CD1  | ILE | 1842 | 69.333 | 107.825 | 80.890 | 0.00 | 0.00 |
| ATOM | 27703 | 1HD1 | ILE | 1842 | 69.668 | 106.972 | 80.301 | 0.00 | 0.00 |
| ATOM | 27704 | 2HD1 | ILE | 1842 | 68.933 | 108.518 | 80.149 | 0.00 | 0.00 |
| ATOM | 27705 | 3HD1 | ILE | 1842 | 70.166 | 108.332 | 81.377 | 0.00 | 0.00 |
| ATOM | 27706 | C    | ILE | 1842 | 65.907 | 109.264 | 84.348 | 0.00 | 0.00 |
| ATOM | 27707 | O    | ILE | 1842 | 65.495 | 110.424 | 84.006 | 0.00 | 0.00 |
| ATOM | 27708 | N    | GLY | 1843 | 65.832 | 108.833 | 85.622 | 0.00 | 0.00 |
| ATOM | 27709 | H    | GLY | 1843 | 66.172 | 107.904 | 85.822 | 0.00 | 0.00 |

|      |       |     |     |      |        |         |        |      |      |
|------|-------|-----|-----|------|--------|---------|--------|------|------|
| ATOM | 27710 | CA  | GLY | 1843 | 65.287 | 109.675 | 86.702 | 0.00 | 0.00 |
| ATOM | 27711 | HA2 | GLY | 1843 | 66.162 | 110.183 | 87.108 | 0.00 | 0.00 |
| ATOM | 27712 | HA3 | GLY | 1843 | 64.617 | 110.472 | 86.379 | 0.00 | 0.00 |
| ATOM | 27713 | C   | GLY | 1843 | 64.576 | 108.889 | 87.851 | 0.00 | 0.00 |
| ATOM | 27714 | O   | GLY | 1843 | 65.172 | 108.135 | 88.659 | 0.00 | 0.00 |
| ATOM | 27715 | N   | LYS | 1844 | 63.246 | 109.084 | 87.882 | 0.00 | 0.00 |
| ATOM | 27716 | H   | LYS | 1844 | 62.846 | 109.667 | 87.160 | 0.00 | 0.00 |
| ATOM | 27717 | CA  | LYS | 1844 | 62.402 | 108.463 | 88.961 | 0.00 | 0.00 |
| ATOM | 27718 | HA  | LYS | 1844 | 62.914 | 107.634 | 89.450 | 0.00 | 0.00 |
| ATOM | 27719 | CB  | LYS | 1844 | 62.236 | 109.555 | 89.991 | 0.00 | 0.00 |
| ATOM | 27720 | HB2 | LYS | 1844 | 63.275 | 109.813 | 90.194 | 0.00 | 0.00 |
| ATOM | 27721 | HB3 | LYS | 1844 | 61.777 | 110.443 | 89.556 | 0.00 | 0.00 |
| ATOM | 27722 | CG  | LYS | 1844 | 61.571 | 109.111 | 91.261 | 0.00 | 0.00 |
| ATOM | 27723 | HG2 | LYS | 1844 | 61.808 | 108.059 | 91.416 | 0.00 | 0.00 |
| ATOM | 27724 | HG3 | LYS | 1844 | 62.105 | 109.556 | 92.100 | 0.00 | 0.00 |
| ATOM | 27725 | CD  | LYS | 1844 | 60.034 | 109.506 | 91.325 | 0.00 | 0.00 |
| ATOM | 27726 | HD2 | LYS | 1844 | 59.853 | 110.579 | 91.388 | 0.00 | 0.00 |
| ATOM | 27727 | HD3 | LYS | 1844 | 59.588 | 108.961 | 90.492 | 0.00 | 0.00 |
| ATOM | 27728 | CE  | LYS | 1844 | 59.373 | 108.900 | 92.583 | 0.00 | 0.00 |
| ATOM | 27729 | HE2 | LYS | 1844 | 59.636 | 109.451 | 93.486 | 0.00 | 0.00 |
| ATOM | 27730 | HE3 | LYS | 1844 | 58.310 | 109.137 | 92.537 | 0.00 | 0.00 |
| ATOM | 27731 | NZ  | LYS | 1844 | 59.535 | 107.389 | 92.733 | 0.00 | 0.00 |
| ATOM | 27732 | HZ1 | LYS | 1844 | 58.954 | 107.059 | 93.491 | 0.00 | 0.00 |
| ATOM | 27733 | HZ2 | LYS | 1844 | 59.296 | 106.915 | 91.874 | 0.00 | 0.00 |
| ATOM | 27734 | HZ3 | LYS | 1844 | 60.496 | 107.279 | 93.023 | 0.00 | 0.00 |
| ATOM | 27735 | C   | LYS | 1844 | 61.143 | 107.770 | 88.315 | 0.00 | 0.00 |

|      |       |     |     |      |        |         |        |      |      |
|------|-------|-----|-----|------|--------|---------|--------|------|------|
| ATOM | 27736 | O   | LYS | 1844 | 60.400 | 108.378 | 87.574 | 0.00 | 0.00 |
| ATOM | 27737 | N   | ALA | 1845 | 60.989 | 106.472 | 88.596 | 0.00 | 0.00 |
| ATOM | 27738 | H   | ALA | 1845 | 61.662 | 105.907 | 89.094 | 0.00 | 0.00 |
| ATOM | 27739 | CA  | ALA | 1845 | 59.817 | 105.699 | 88.215 | 0.00 | 0.00 |
| ATOM | 27740 | HA  | ALA | 1845 | 59.409 | 106.184 | 87.328 | 0.00 | 0.00 |
| ATOM | 27741 | CB  | ALA | 1845 | 60.156 | 104.288 | 87.874 | 0.00 | 0.00 |
| ATOM | 27742 | HB1 | ALA | 1845 | 59.243 | 103.847 | 87.476 | 0.00 | 0.00 |
| ATOM | 27743 | HB2 | ALA | 1845 | 60.914 | 104.182 | 87.098 | 0.00 | 0.00 |
| ATOM | 27744 | HB3 | ALA | 1845 | 60.459 | 103.858 | 88.829 | 0.00 | 0.00 |
| ATOM | 27745 | C   | ALA | 1845 | 58.583 | 105.924 | 89.155 | 0.00 | 0.00 |
| ATOM | 27746 | O   | ALA | 1845 | 58.691 | 106.294 | 90.346 | 0.00 | 0.00 |
| ATOM | 27747 | N   | GLY | 1846 | 57.401 | 105.734 | 88.659 | 0.00 | 0.00 |
| ATOM | 27748 | H   | GLY | 1846 | 57.326 | 105.644 | 87.656 | 0.00 | 0.00 |
| ATOM | 27749 | CA  | GLY | 1846 | 56.145 | 105.585 | 89.363 | 0.00 | 0.00 |
| ATOM | 27750 | HA2 | GLY | 1846 | 56.007 | 104.511 | 89.481 | 0.00 | 0.00 |
| ATOM | 27751 | HA3 | GLY | 1846 | 56.180 | 106.033 | 90.356 | 0.00 | 0.00 |
| ATOM | 27752 | C   | GLY | 1846 | 54.907 | 105.952 | 88.544 | 0.00 | 0.00 |
| ATOM | 27753 | O   | GLY | 1846 | 54.965 | 105.872 | 87.328 | 0.00 | 0.00 |
| ATOM | 27754 | N   | ASN | 1847 | 53.818 | 106.317 | 89.258 | 0.00 | 0.00 |
| ATOM | 27755 | H   | ASN | 1847 | 53.900 | 106.192 | 90.257 | 0.00 | 0.00 |
| ATOM | 27756 | CA  | ASN | 1847 | 52.575 | 106.758 | 88.695 | 0.00 | 0.00 |
| ATOM | 27757 | HA  | ASN | 1847 | 52.599 | 106.384 | 87.671 | 0.00 | 0.00 |
| ATOM | 27758 | CB  | ASN | 1847 | 51.437 | 105.962 | 89.388 | 0.00 | 0.00 |
| ATOM | 27759 | HB2 | ASN | 1847 | 51.661 | 104.898 | 89.313 | 0.00 | 0.00 |
| ATOM | 27760 | HB3 | ASN | 1847 | 51.414 | 106.309 | 90.421 | 0.00 | 0.00 |
| ATOM | 27761 | CG  | ASN | 1847 | 50.112 | 106.273 | 88.864 | 0.00 | 0.00 |

|            |               |        |         |        |      |      |
|------------|---------------|--------|---------|--------|------|------|
| ATOM 27762 | OD1 ASN 1847  | 49.916 | 106.961 | 87.883 | 0.00 | 0.00 |
| ATOM 27763 | ND2 ASN 1847  | 49.192 | 105.620 | 89.537 | 0.00 | 0.00 |
| ATOM 27764 | 1HD2 ASN 1847 | 48.233 | 105.597 | 89.221 | 0.00 | 0.00 |
| ATOM 27765 | 2HD2 ASN 1847 | 49.405 | 105.010 | 90.314 | 0.00 | 0.00 |
| ATOM 27766 | C ASN 1847    | 52.499 | 108.341 | 88.748 | 0.00 | 0.00 |
| ATOM 27767 | O ASN 1847    | 52.017 | 108.877 | 89.759 | 0.00 | 0.00 |
| ATOM 27768 | N PRO 1848    | 52.651 | 109.067 | 87.614 | 0.00 | 0.00 |
| ATOM 27769 | CD PRO 1848   | 52.767 | 108.496 | 86.300 | 0.00 | 0.00 |
| ATOM 27770 | HD2 PRO 1848  | 51.774 | 108.288 | 85.901 | 0.00 | 0.00 |
| ATOM 27771 | HD3 PRO 1848  | 53.343 | 107.580 | 86.170 | 0.00 | 0.00 |
| ATOM 27772 | CG PRO 1848   | 53.450 | 109.553 | 85.466 | 0.00 | 0.00 |
| ATOM 27773 | HG2 PRO 1848  | 54.489 | 109.231 | 85.404 | 0.00 | 0.00 |
| ATOM 27774 | HG3 PRO 1848  | 53.131 | 109.603 | 84.425 | 0.00 | 0.00 |
| ATOM 27775 | CB PRO 1848   | 53.404 | 110.973 | 86.160 | 0.00 | 0.00 |
| ATOM 27776 | HB2 PRO 1848  | 54.447 | 111.251 | 86.311 | 0.00 | 0.00 |
| ATOM 27777 | HB3 PRO 1848  | 52.845 | 111.709 | 85.582 | 0.00 | 0.00 |
| ATOM 27778 | CA PRO 1848   | 52.795 | 110.548 | 87.549 | 0.00 | 0.00 |
| ATOM 27779 | HA PRO 1848   | 53.550 | 110.926 | 88.239 | 0.00 | 0.00 |
| ATOM 27780 | C PRO 1848    | 51.434 | 111.333 | 87.816 | 0.00 | 0.00 |
| ATOM 27781 | O PRO 1848    | 51.471 | 112.562 | 88.059 | 0.00 | 0.00 |
| ATOM 27782 | N ASP 1849    | 50.296 | 110.626 | 87.732 | 0.00 | 0.00 |
| ATOM 27783 | H ASP 1849    | 50.394 | 109.631 | 87.595 | 0.00 | 0.00 |
| ATOM 27784 | CA ASP 1849   | 48.903 | 110.981 | 88.100 | 0.00 | 0.00 |
| ATOM 27785 | HA ASP 1849   | 48.595 | 111.898 | 87.597 | 0.00 | 0.00 |
| ATOM 27786 | CB ASP 1849   | 47.838 | 109.927 | 87.642 | 0.00 | 0.00 |
| ATOM 27787 | HB2 ASP 1849  | 48.011 | 109.791 | 86.575 | 0.00 | 0.00 |



|      |       |      |     |      |        |         |        |      |      |
|------|-------|------|-----|------|--------|---------|--------|------|------|
| ATOM | 27788 | HB3  | ASP | 1849 | 48.015 | 109.005 | 88.196 | 0.00 | 0.00 |
| ATOM | 27789 | CG   | ASP | 1849 | 46.396 | 110.413 | 87.761 | 0.00 | 0.00 |
| ATOM | 27790 | OD1  | ASP | 1849 | 45.623 | 109.678 | 88.444 | 0.00 | 0.00 |
| ATOM | 27791 | OD2  | ASP | 1849 | 46.072 | 111.387 | 87.014 | 0.00 | 0.00 |
| ATOM | 27792 | C    | ASP | 1849 | 48.777 | 111.309 | 89.577 | 0.00 | 0.00 |
| ATOM | 27793 | O    | ASP | 1849 | 48.135 | 112.346 | 89.849 | 0.00 | 0.00 |
| ATOM | 27794 | N    | ILE | 1850 | 49.449 | 110.600 | 90.413 | 0.00 | 0.00 |
| ATOM | 27795 | H    | ILE | 1850 | 50.300 | 110.157 | 90.099 | 0.00 | 0.00 |
| ATOM | 27796 | CA   | ILE | 1850 | 49.268 | 110.522 | 91.813 | 0.00 | 0.00 |
| ATOM | 27797 | HA   | ILE | 1850 | 48.736 | 111.447 | 92.035 | 0.00 | 0.00 |
| ATOM | 27798 | CB   | ILE | 1850 | 48.458 | 109.316 | 92.294 | 0.00 | 0.00 |
| ATOM | 27799 | HB   | ILE | 1850 | 48.428 | 109.419 | 93.379 | 0.00 | 0.00 |
| ATOM | 27800 | CG2  | ILE | 1850 | 47.018 | 109.380 | 91.848 | 0.00 | 0.00 |
| ATOM | 27801 | 1HG2 | ILE | 1850 | 46.481 | 108.494 | 92.185 | 0.00 | 0.00 |
| ATOM | 27802 | 2HG2 | ILE | 1850 | 46.584 | 110.357 | 92.064 | 0.00 | 0.00 |
| ATOM | 27803 | 3HG2 | ILE | 1850 | 46.855 | 109.306 | 90.773 | 0.00 | 0.00 |
| ATOM | 27804 | CG1  | ILE | 1850 | 49.221 | 108.025 | 92.016 | 0.00 | 0.00 |
| ATOM | 27805 | 2HG1 | ILE | 1850 | 49.014 | 107.658 | 91.011 | 0.00 | 0.00 |
| ATOM | 27806 | 3HG1 | ILE | 1850 | 50.291 | 108.176 | 92.153 | 0.00 | 0.00 |
| ATOM | 27807 | CD1  | ILE | 1850 | 48.759 | 106.892 | 92.968 | 0.00 | 0.00 |
| ATOM | 27808 | 1HD1 | ILE | 1850 | 47.762 | 106.470 | 92.841 | 0.00 | 0.00 |
| ATOM | 27809 | 2HD1 | ILE | 1850 | 49.366 | 106.026 | 92.704 | 0.00 | 0.00 |
| ATOM | 27810 | 3HD1 | ILE | 1850 | 48.809 | 107.172 | 94.020 | 0.00 | 0.00 |
| ATOM | 27811 | C    | ILE | 1850 | 50.513 | 110.674 | 92.686 | 0.00 | 0.00 |
| ATOM | 27812 | O    | ILE | 1850 | 50.395 | 110.930 | 93.891 | 0.00 | 0.00 |
| ATOM | 27813 | N    | GLN | 1851 | 51.709 | 110.584 | 92.070 | 0.00 | 0.00 |

|      |       |      |     |      |        |         |        |      |      |
|------|-------|------|-----|------|--------|---------|--------|------|------|
| ATOM | 27814 | H    | GLN | 1851 | 51.679 | 110.267 | 91.111 | 0.00 | 0.00 |
| ATOM | 27815 | CA   | GLN | 1851 | 53.047 | 110.933 | 92.553 | 0.00 | 0.00 |
| ATOM | 27816 | HA   | GLN | 1851 | 52.982 | 111.179 | 93.613 | 0.00 | 0.00 |
| ATOM | 27817 | CB   | GLN | 1851 | 53.851 | 109.611 | 92.588 | 0.00 | 0.00 |
| ATOM | 27818 | HB2  | GLN | 1851 | 54.070 | 109.347 | 91.554 | 0.00 | 0.00 |
| ATOM | 27819 | HB3  | GLN | 1851 | 54.827 | 109.861 | 93.003 | 0.00 | 0.00 |
| ATOM | 27820 | CG   | GLN | 1851 | 53.357 | 108.394 | 93.342 | 0.00 | 0.00 |
| ATOM | 27821 | HG2  | GLN | 1851 | 53.039 | 108.551 | 94.373 | 0.00 | 0.00 |
| ATOM | 27822 | HG3  | GLN | 1851 | 52.453 | 108.071 | 92.826 | 0.00 | 0.00 |
| ATOM | 27823 | CD   | GLN | 1851 | 54.372 | 107.233 | 93.295 | 0.00 | 0.00 |
| ATOM | 27824 | OE1  | GLN | 1851 | 54.383 | 106.429 | 92.386 | 0.00 | 0.00 |
| ATOM | 27825 | NE2  | GLN | 1851 | 55.238 | 107.116 | 94.266 | 0.00 | 0.00 |
| ATOM | 27826 | 1HE2 | GLN | 1851 | 55.925 | 106.383 | 94.165 | 0.00 | 0.00 |
| ATOM | 27827 | 2HE2 | GLN | 1851 | 55.175 | 107.845 | 94.962 | 0.00 | 0.00 |
| ATOM | 27828 | C    | GLN | 1851 | 53.806 | 111.971 | 91.814 | 0.00 | 0.00 |
| ATOM | 27829 | O    | GLN | 1851 | 53.777 | 111.877 | 90.577 | 0.00 | 0.00 |
| ATOM | 27830 | N    | PRO | 1852 | 54.274 | 112.949 | 92.595 | 0.00 | 0.00 |
| ATOM | 27831 | CD   | PRO | 1852 | 54.314 | 112.948 | 94.069 | 0.00 | 0.00 |
| ATOM | 27832 | HD2  | PRO | 1852 | 53.297 | 113.004 | 94.458 | 0.00 | 0.00 |
| ATOM | 27833 | HD3  | PRO | 1852 | 54.716 | 112.014 | 94.461 | 0.00 | 0.00 |
| ATOM | 27834 | CG   | PRO | 1852 | 55.284 | 114.066 | 94.456 | 0.00 | 0.00 |
| ATOM | 27835 | HG2  | PRO | 1852 | 54.743 | 114.618 | 95.224 | 0.00 | 0.00 |
| ATOM | 27836 | HG3  | PRO | 1852 | 56.174 | 113.653 | 94.933 | 0.00 | 0.00 |
| ATOM | 27837 | CB   | PRO | 1852 | 55.377 | 114.917 | 93.163 | 0.00 | 0.00 |
| ATOM | 27838 | HB2  | PRO | 1852 | 54.468 | 115.514 | 93.082 | 0.00 | 0.00 |
| ATOM | 27839 | HB3  | PRO | 1852 | 56.287 | 115.516 | 93.158 | 0.00 | 0.00 |

|      |       |      |     |      |        |         |        |      |      |
|------|-------|------|-----|------|--------|---------|--------|------|------|
| ATOM | 27840 | CA   | PRO | 1852 | 55.244 | 113.933 | 92.023 | 0.00 | 0.00 |
| ATOM | 27841 | HA   | PRO | 1852 | 54.793 | 114.398 | 91.146 | 0.00 | 0.00 |
| ATOM | 27842 | C    | PRO | 1852 | 56.598 | 113.384 | 91.538 | 0.00 | 0.00 |
| ATOM | 27843 | O    | PRO | 1852 | 56.916 | 112.215 | 91.776 | 0.00 | 0.00 |
| ATOM | 27844 | N    | ASN | 1853 | 57.445 | 114.231 | 90.970 | 0.00 | 0.00 |
| ATOM | 27845 | H    | ASN | 1853 | 57.098 | 115.160 | 90.781 | 0.00 | 0.00 |
| ATOM | 27846 | CA   | ASN | 1853 | 58.863 | 114.138 | 90.497 | 0.00 | 0.00 |
| ATOM | 27847 | HA   | ASN | 1853 | 59.033 | 115.065 | 89.950 | 0.00 | 0.00 |
| ATOM | 27848 | CB   | ASN | 1853 | 59.815 | 113.982 | 91.760 | 0.00 | 0.00 |
| ATOM | 27849 | HB2  | ASN | 1853 | 59.532 | 114.662 | 92.563 | 0.00 | 0.00 |
| ATOM | 27850 | HB3  | ASN | 1853 | 59.674 | 112.999 | 92.210 | 0.00 | 0.00 |
| ATOM | 27851 | CG   | ASN | 1853 | 61.259 | 114.347 | 91.526 | 0.00 | 0.00 |
| ATOM | 27852 | OD1  | ASN | 1853 | 61.452 | 115.289 | 90.736 | 0.00 | 0.00 |
| ATOM | 27853 | ND2  | ASN | 1853 | 62.297 | 113.692 | 92.083 | 0.00 | 0.00 |
| ATOM | 27854 | 1HD2 | ASN | 1853 | 63.197 | 114.009 | 91.753 | 0.00 | 0.00 |
| ATOM | 27855 | 2HD2 | ASN | 1853 | 62.185 | 112.817 | 92.575 | 0.00 | 0.00 |
| ATOM | 27856 | C    | ASN | 1853 | 59.097 | 112.984 | 89.468 | 0.00 | 0.00 |
| ATOM | 27857 | O    | ASN | 1853 | 60.201 | 112.739 | 89.082 | 0.00 | 0.00 |
| ATOM | 27858 | N    | VAL | 1854 | 58.052 | 112.299 | 89.129 | 0.00 | 0.00 |
| ATOM | 27859 | H    | VAL | 1854 | 57.159 | 112.444 | 89.579 | 0.00 | 0.00 |
| ATOM | 27860 | CA   | VAL | 1854 | 58.162 | 111.058 | 88.253 | 0.00 | 0.00 |
| ATOM | 27861 | HA   | VAL | 1854 | 58.995 | 110.415 | 88.537 | 0.00 | 0.00 |
| ATOM | 27862 | CB   | VAL | 1854 | 56.897 | 110.170 | 88.297 | 0.00 | 0.00 |
| ATOM | 27863 | HB   | VAL | 1854 | 55.987 | 110.711 | 88.038 | 0.00 | 0.00 |
| ATOM | 27864 | CG1  | VAL | 1854 | 56.994 | 108.960 | 87.291 | 0.00 | 0.00 |
| ATOM | 27865 | 1HG1 | VAL | 1854 | 56.028 | 108.470 | 87.421 | 0.00 | 0.00 |

|      |       |      |     |      |        |         |        |      |      |
|------|-------|------|-----|------|--------|---------|--------|------|------|
| ATOM | 27866 | 2HG1 | VAL | 1854 | 57.085 | 109.310 | 86.263 | 0.00 | 0.00 |
| ATOM | 27867 | 3HG1 | VAL | 1854 | 57.819 | 108.260 | 87.422 | 0.00 | 0.00 |
| ATOM | 27868 | CG2  | VAL | 1854 | 56.598 | 109.538 | 89.655 | 0.00 | 0.00 |
| ATOM | 27869 | 1HG2 | VAL | 1854 | 57.551 | 109.319 | 90.138 | 0.00 | 0.00 |
| ATOM | 27870 | 2HG2 | VAL | 1854 | 55.985 | 110.230 | 90.233 | 0.00 | 0.00 |
| ATOM | 27871 | 3HG2 | VAL | 1854 | 56.093 | 108.575 | 89.585 | 0.00 | 0.00 |
| ATOM | 27872 | C    | VAL | 1854 | 58.518 | 111.438 | 86.813 | 0.00 | 0.00 |
| ATOM | 27873 | O    | VAL | 1854 | 57.977 | 112.337 | 86.225 | 0.00 | 0.00 |
| ATOM | 27874 | N    | THR | 1855 | 59.398 | 110.630 | 86.189 | 0.00 | 0.00 |
| ATOM | 27875 | H    | THR | 1855 | 59.741 | 109.836 | 86.711 | 0.00 | 0.00 |
| ATOM | 27876 | CA   | THR | 1855 | 59.904 | 110.760 | 84.816 | 0.00 | 0.00 |
| ATOM | 27877 | HA   | THR | 1855 | 59.199 | 111.396 | 84.280 | 0.00 | 0.00 |
| ATOM | 27878 | CB   | THR | 1855 | 61.261 | 111.447 | 84.789 | 0.00 | 0.00 |
| ATOM | 27879 | HB   | THR | 1855 | 61.633 | 111.134 | 83.814 | 0.00 | 0.00 |
| ATOM | 27880 | CG2  | THR | 1855 | 61.013 | 112.944 | 84.838 | 0.00 | 0.00 |
| ATOM | 27881 | 1HG2 | THR | 1855 | 61.900 | 113.541 | 84.624 | 0.00 | 0.00 |
| ATOM | 27882 | 2HG2 | THR | 1855 | 60.378 | 113.226 | 83.998 | 0.00 | 0.00 |
| ATOM | 27883 | 3HG2 | THR | 1855 | 60.431 | 113.236 | 85.713 | 0.00 | 0.00 |
| ATOM | 27884 | OG1  | THR | 1855 | 62.016 | 111.045 | 85.917 | 0.00 | 0.00 |
| ATOM | 27885 | HG1  | THR | 1855 | 61.949 | 111.759 | 86.555 | 0.00 | 0.00 |
| ATOM | 27886 | C    | THR | 1855 | 59.837 | 109.463 | 84.037 | 0.00 | 0.00 |
| ATOM | 27887 | O    | THR | 1855 | 60.100 | 109.396 | 82.787 | 0.00 | 0.00 |
| ATOM | 27888 | N    | ILE | 1856 | 59.248 | 108.420 | 84.639 | 0.00 | 0.00 |
| ATOM | 27889 | H    | ILE | 1856 | 58.987 | 108.545 | 85.606 | 0.00 | 0.00 |
| ATOM | 27890 | CA   | ILE | 1856 | 59.032 | 107.114 | 83.974 | 0.00 | 0.00 |
| ATOM | 27891 | HA   | ILE | 1856 | 59.017 | 107.175 | 82.886 | 0.00 | 0.00 |

|      |       |      |     |      |        |         |        |      |      |
|------|-------|------|-----|------|--------|---------|--------|------|------|
| ATOM | 27892 | CB   | ILE | 1856 | 60.192 | 106.138 | 84.371 | 0.00 | 0.00 |
| ATOM | 27893 | HB   | ILE | 1856 | 60.126 | 106.029 | 85.453 | 0.00 | 0.00 |
| ATOM | 27894 | CG2  | ILE | 1856 | 59.996 | 104.774 | 83.679 | 0.00 | 0.00 |
| ATOM | 27895 | 1HG2 | ILE | 1856 | 59.686 | 105.015 | 82.662 | 0.00 | 0.00 |
| ATOM | 27896 | 2HG2 | ILE | 1856 | 60.852 | 104.111 | 83.555 | 0.00 | 0.00 |
| ATOM | 27897 | 3HG2 | ILE | 1856 | 59.170 | 104.228 | 84.135 | 0.00 | 0.00 |
| ATOM | 27898 | CG1  | ILE | 1856 | 61.633 | 106.678 | 84.020 | 0.00 | 0.00 |
| ATOM | 27899 | 2HG1 | ILE | 1856 | 62.220 | 105.985 | 83.416 | 0.00 | 0.00 |
| ATOM | 27900 | 3HG1 | ILE | 1856 | 61.569 | 107.547 | 83.365 | 0.00 | 0.00 |
| ATOM | 27901 | CD1  | ILE | 1856 | 62.420 | 106.967 | 85.313 | 0.00 | 0.00 |
| ATOM | 27902 | 1HD1 | ILE | 1856 | 62.184 | 106.130 | 85.970 | 0.00 | 0.00 |
| ATOM | 27903 | 2HD1 | ILE | 1856 | 63.492 | 106.885 | 85.131 | 0.00 | 0.00 |
| ATOM | 27904 | 3HD1 | ILE | 1856 | 62.037 | 107.893 | 85.743 | 0.00 | 0.00 |
| ATOM | 27905 | C    | ILE | 1856 | 57.675 | 106.587 | 84.431 | 0.00 | 0.00 |
| ATOM | 27906 | O    | ILE | 1856 | 57.632 | 106.061 | 85.531 | 0.00 | 0.00 |
| ATOM | 27907 | N    | PRO | 1857 | 56.636 | 106.746 | 83.645 | 0.00 | 0.00 |
| ATOM | 27908 | CD   | PRO | 1857 | 56.533 | 107.635 | 82.480 | 0.00 | 0.00 |
| ATOM | 27909 | HD2  | PRO | 1857 | 56.574 | 108.685 | 82.769 | 0.00 | 0.00 |
| ATOM | 27910 | HD3  | PRO | 1857 | 57.371 | 107.522 | 81.792 | 0.00 | 0.00 |
| ATOM | 27911 | CG   | PRO | 1857 | 55.256 | 107.228 | 81.795 | 0.00 | 0.00 |
| ATOM | 27912 | HG2  | PRO | 1857 | 54.796 | 108.063 | 81.267 | 0.00 | 0.00 |
| ATOM | 27913 | HG3  | PRO | 1857 | 55.506 | 106.453 | 81.071 | 0.00 | 0.00 |
| ATOM | 27914 | CB   | PRO | 1857 | 54.415 | 106.633 | 82.859 | 0.00 | 0.00 |
| ATOM | 27915 | HB2  | PRO | 1857 | 53.814 | 107.360 | 83.405 | 0.00 | 0.00 |
| ATOM | 27916 | HB3  | PRO | 1857 | 53.765 | 105.866 | 82.438 | 0.00 | 0.00 |
| ATOM | 27917 | CA   | PRO | 1857 | 55.352 | 106.091 | 83.908 | 0.00 | 0.00 |

|      |       |      |     |      |        |         |        |      |      |
|------|-------|------|-----|------|--------|---------|--------|------|------|
| ATOM | 27918 | HA   | PRO | 1857 | 54.990 | 106.445 | 84.873 | 0.00 | 0.00 |
| ATOM | 27919 | C    | PRO | 1857 | 55.411 | 104.537 | 83.954 | 0.00 | 0.00 |
| ATOM | 27920 | O    | PRO | 1857 | 55.637 | 103.915 | 82.905 | 0.00 | 0.00 |
| ATOM | 27921 | N    | ILE | 1858 | 55.164 | 103.951 | 85.089 | 0.00 | 0.00 |
| ATOM | 27922 | H    | ILE | 1858 | 55.199 | 104.521 | 85.921 | 0.00 | 0.00 |
| ATOM | 27923 | CA   | ILE | 1858 | 54.875 | 102.528 | 85.264 | 0.00 | 0.00 |
| ATOM | 27924 | HA   | ILE | 1858 | 55.345 | 102.047 | 84.407 | 0.00 | 0.00 |
| ATOM | 27925 | CB   | ILE | 1858 | 55.353 | 101.802 | 86.549 | 0.00 | 0.00 |
| ATOM | 27926 | HB   | ILE | 1858 | 54.894 | 102.274 | 87.418 | 0.00 | 0.00 |
| ATOM | 27927 | CG2  | ILE | 1858 | 55.087 | 100.210 | 86.637 | 0.00 | 0.00 |
| ATOM | 27928 | 1HG2 | ILE | 1858 | 55.857 | 99.675  | 86.081 | 0.00 | 0.00 |
| ATOM | 27929 | 2HG2 | ILE | 1858 | 55.046 | 99.800  | 87.646 | 0.00 | 0.00 |
| ATOM | 27930 | 3HG2 | ILE | 1858 | 54.101 | 99.938  | 86.261 | 0.00 | 0.00 |
| ATOM | 27931 | CG1  | ILE | 1858 | 56.867 | 102.013 | 86.673 | 0.00 | 0.00 |
| ATOM | 27932 | 2HG1 | ILE | 1858 | 57.264 | 101.554 | 85.767 | 0.00 | 0.00 |
| ATOM | 27933 | 3HG1 | ILE | 1858 | 57.188 | 103.054 | 86.711 | 0.00 | 0.00 |
| ATOM | 27934 | CD1  | ILE | 1858 | 57.345 | 101.349 | 87.926 | 0.00 | 0.00 |
| ATOM | 27935 | 1HD1 | ILE | 1858 | 58.341 | 101.720 | 88.167 | 0.00 | 0.00 |
| ATOM | 27936 | 2HD1 | ILE | 1858 | 56.678 | 101.600 | 88.751 | 0.00 | 0.00 |
| ATOM | 27937 | 3HD1 | ILE | 1858 | 57.497 | 100.279 | 87.782 | 0.00 | 0.00 |
| ATOM | 27938 | C    | ILE | 1858 | 53.349 | 102.290 | 85.114 | 0.00 | 0.00 |
| ATOM | 27939 | O    | ILE | 1858 | 52.491 | 102.953 | 85.715 | 0.00 | 0.00 |
| ATOM | 27940 | N    | GLY | 1859 | 53.018 | 101.225 | 84.416 | 0.00 | 0.00 |
| ATOM | 27941 | H    | GLY | 1859 | 53.768 | 100.585 | 84.196 | 0.00 | 0.00 |
| ATOM | 27942 | CA   | GLY | 1859 | 51.705 | 100.813 | 84.137 | 0.00 | 0.00 |
| ATOM | 27943 | HA2  | GLY | 1859 | 51.324 | 101.361 | 83.276 | 0.00 | 0.00 |

|      |       |     |     |      |        |         |        |      |      |
|------|-------|-----|-----|------|--------|---------|--------|------|------|
| ATOM | 27944 | HA3 | GLY | 1859 | 51.082 | 101.174 | 84.955 | 0.00 | 0.00 |
| ATOM | 27945 | C   | GLY | 1859 | 51.477 | 99.294  | 83.939 | 0.00 | 0.00 |
| ATOM | 27946 | O   | GLY | 1859 | 52.371 | 98.438  | 84.220 | 0.00 | 0.00 |
| ATOM | 27947 | N   | ALA | 1860 | 50.277 | 99.000  | 83.515 | 0.00 | 0.00 |
| ATOM | 27948 | H   | ALA | 1860 | 49.730 | 99.794  | 83.215 | 0.00 | 0.00 |
| ATOM | 27949 | CA  | ALA | 1860 | 49.884 | 97.593  | 83.275 | 0.00 | 0.00 |
| ATOM | 27950 | HA  | ALA | 1860 | 49.979 | 97.279  | 84.314 | 0.00 | 0.00 |
| ATOM | 27951 | CB  | ALA | 1860 | 48.410 | 97.566  | 82.773 | 0.00 | 0.00 |
| ATOM | 27952 | HB1 | ALA | 1860 | 47.685 | 97.897  | 83.517 | 0.00 | 0.00 |
| ATOM | 27953 | HB2 | ALA | 1860 | 48.253 | 98.185  | 81.890 | 0.00 | 0.00 |
| ATOM | 27954 | HB3 | ALA | 1860 | 48.144 | 96.574  | 82.407 | 0.00 | 0.00 |
| ATOM | 27955 | C   | ALA | 1860 | 50.811 | 96.836  | 82.225 | 0.00 | 0.00 |
| ATOM | 27956 | O   | ALA | 1860 | 50.957 | 95.616  | 82.233 | 0.00 | 0.00 |
| ATOM | 27957 | N   | ALA | 1861 | 51.425 | 97.594  | 81.296 | 0.00 | 0.00 |
| ATOM | 27958 | H   | ALA | 1861 | 51.245 | 98.587  | 81.331 | 0.00 | 0.00 |
| ATOM | 27959 | CA  | ALA | 1861 | 52.260 | 96.937  | 80.229 | 0.00 | 0.00 |
| ATOM | 27960 | HA  | ALA | 1861 | 51.840 | 95.933  | 80.166 | 0.00 | 0.00 |
| ATOM | 27961 | CB  | ALA | 1861 | 52.014 | 97.728  | 78.894 | 0.00 | 0.00 |
| ATOM | 27962 | HB1 | ALA | 1861 | 52.724 | 97.387  | 78.140 | 0.00 | 0.00 |
| ATOM | 27963 | HB2 | ALA | 1861 | 50.995 | 97.559  | 78.546 | 0.00 | 0.00 |
| ATOM | 27964 | HB3 | ALA | 1861 | 52.194 | 98.783  | 79.101 | 0.00 | 0.00 |
| ATOM | 27965 | C   | ALA | 1861 | 53.699 | 96.737  | 80.652 | 0.00 | 0.00 |
| ATOM | 27966 | O   | ALA | 1861 | 54.526 | 96.316  | 79.868 | 0.00 | 0.00 |
| ATOM | 27967 | N   | THR | 1862 | 54.097 | 97.015  | 81.909 | 0.00 | 0.00 |
| ATOM | 27968 | H   | THR | 1862 | 53.448 | 97.485  | 82.525 | 0.00 | 0.00 |
| ATOM | 27969 | CA  | THR | 1862 | 55.474 | 97.121  | 82.439 | 0.00 | 0.00 |

|      |       |      |     |      |        |        |        |      |      |
|------|-------|------|-----|------|--------|--------|--------|------|------|
| ATOM | 27970 | HA   | THR | 1862 | 56.225 | 97.193 | 81.652 | 0.00 | 0.00 |
| ATOM | 27971 | CB   | THR | 1862 | 55.606 | 98.379 | 83.402 | 0.00 | 0.00 |
| ATOM | 27972 | HB   | THR | 1862 | 55.091 | 98.195 | 84.345 | 0.00 | 0.00 |
| ATOM | 27973 | CG2  | THR | 1862 | 56.970 | 98.607 | 83.938 | 0.00 | 0.00 |
| ATOM | 27974 | 1HG2 | THR | 1862 | 57.669 | 98.404 | 83.126 | 0.00 | 0.00 |
| ATOM | 27975 | 2HG2 | THR | 1862 | 57.148 | 99.555 | 84.446 | 0.00 | 0.00 |
| ATOM | 27976 | 3HG2 | THR | 1862 | 57.079 | 97.840 | 84.705 | 0.00 | 0.00 |
| ATOM | 27977 | OG1  | THR | 1862 | 55.039 | 99.608 | 82.868 | 0.00 | 0.00 |
| ATOM | 27978 | HG1  | THR | 1862 | 55.416 | 99.730 | 81.993 | 0.00 | 0.00 |
| ATOM | 27979 | C    | THR | 1862 | 55.923 | 95.937 | 83.222 | 0.00 | 0.00 |
| ATOM | 27980 | O    | THR | 1862 | 55.213 | 95.416 | 84.094 | 0.00 | 0.00 |
| ATOM | 27981 | N    | GLU | 1863 | 57.130 | 95.394 | 82.865 | 0.00 | 0.00 |
| ATOM | 27982 | H    | GLU | 1863 | 57.595 | 95.622 | 81.998 | 0.00 | 0.00 |
| ATOM | 27983 | CA   | GLU | 1863 | 57.873 | 94.452 | 83.775 | 0.00 | 0.00 |
| ATOM | 27984 | HA   | GLU | 1863 | 57.211 | 93.868 | 84.415 | 0.00 | 0.00 |
| ATOM | 27985 | CB   | GLU | 1863 | 58.502 | 93.288 | 82.943 | 0.00 | 0.00 |
| ATOM | 27986 | HB2  | GLU | 1863 | 57.823 | 92.740 | 82.290 | 0.00 | 0.00 |
| ATOM | 27987 | HB3  | GLU | 1863 | 59.121 | 93.773 | 82.188 | 0.00 | 0.00 |
| ATOM | 27988 | CG   | GLU | 1863 | 59.411 | 92.288 | 83.607 | 0.00 | 0.00 |
| ATOM | 27989 | HG2  | GLU | 1863 | 59.951 | 91.685 | 82.877 | 0.00 | 0.00 |
| ATOM | 27990 | HG3  | GLU | 1863 | 60.192 | 92.888 | 84.072 | 0.00 | 0.00 |
| ATOM | 27991 | CD   | GLU | 1863 | 58.710 | 91.395 | 84.748 | 0.00 | 0.00 |
| ATOM | 27992 | OE1  | GLU | 1863 | 58.693 | 90.187 | 84.696 | 0.00 | 0.00 |
| ATOM | 27993 | OE2  | GLU | 1863 | 58.255 | 92.072 | 85.654 | 0.00 | 0.00 |
| ATOM | 27994 | C    | GLU | 1863 | 58.918 | 95.130 | 84.622 | 0.00 | 0.00 |
| ATOM | 27995 | O    | GLU | 1863 | 59.354 | 96.222 | 84.247 | 0.00 | 0.00 |



|            |      |          |        |        |        |      |      |
|------------|------|----------|--------|--------|--------|------|------|
| ATOM 27996 | N    | VAL 1864 | 59.244 | 94.620 | 85.812 | 0.00 | 0.00 |
| ATOM 27997 | H    | VAL 1864 | 58.881 | 93.705 | 86.038 | 0.00 | 0.00 |
| ATOM 27998 | CA   | VAL 1864 | 60.179 | 95.288 | 86.783 | 0.00 | 0.00 |
| ATOM 27999 | HA   | VAL 1864 | 60.575 | 96.206 | 86.349 | 0.00 | 0.00 |
| ATOM 28000 | CB   | VAL 1864 | 59.487 | 95.693 | 88.069 | 0.00 | 0.00 |
| ATOM 28001 | HB   | VAL 1864 | 58.817 | 96.517 | 87.819 | 0.00 | 0.00 |
| ATOM 28002 | CG1  | VAL 1864 | 58.726 | 94.596 | 88.905 | 0.00 | 0.00 |
| ATOM 28003 | 1HG1 | VAL 1864 | 59.491 | 94.048 | 89.455 | 0.00 | 0.00 |
| ATOM 28004 | 2HG1 | VAL 1864 | 58.208 | 95.177 | 89.669 | 0.00 | 0.00 |
| ATOM 28005 | 3HG1 | VAL 1864 | 57.999 | 93.979 | 88.376 | 0.00 | 0.00 |
| ATOM 28006 | CG2  | VAL 1864 | 60.538 | 96.304 | 88.921 | 0.00 | 0.00 |
| ATOM 28007 | 1HG2 | VAL 1864 | 61.119 | 97.027 | 88.348 | 0.00 | 0.00 |
| ATOM 28008 | 2HG2 | VAL 1864 | 60.012 | 96.676 | 89.799 | 0.00 | 0.00 |
| ATOM 28009 | 3HG2 | VAL 1864 | 61.266 | 95.561 | 89.248 | 0.00 | 0.00 |
| ATOM 28010 | C    | VAL 1864 | 61.432 | 94.440 | 86.941 | 0.00 | 0.00 |
| ATOM 28011 | O    | VAL 1864 | 61.352 | 93.301 | 87.484 | 0.00 | 0.00 |
| ATOM 28012 | N    | ILE 1865 | 62.618 | 94.991 | 86.662 | 0.00 | 0.00 |
| ATOM 28013 | H    | ILE 1865 | 62.533 | 95.945 | 86.340 | 0.00 | 0.00 |
| ATOM 28014 | CA   | ILE 1865 | 63.861 | 94.427 | 86.938 | 0.00 | 0.00 |
| ATOM 28015 | HA   | ILE 1865 | 63.825 | 93.375 | 87.220 | 0.00 | 0.00 |
| ATOM 28016 | CB   | ILE 1865 | 64.875 | 94.472 | 85.811 | 0.00 | 0.00 |
| ATOM 28017 | HB   | ILE 1865 | 65.033 | 95.525 | 85.578 | 0.00 | 0.00 |
| ATOM 28018 | CG2  | ILE 1865 | 66.201 | 93.843 | 86.242 | 0.00 | 0.00 |
| ATOM 28019 | 1HG2 | ILE 1865 | 66.137 | 92.763 | 86.109 | 0.00 | 0.00 |
| ATOM 28020 | 2HG2 | ILE 1865 | 66.899 | 94.240 | 85.505 | 0.00 | 0.00 |
| ATOM 28021 | 3HG2 | ILE 1865 | 66.449 | 94.026 | 87.288 | 0.00 | 0.00 |

|      |       |      |     |      |        |        |        |      |      |
|------|-------|------|-----|------|--------|--------|--------|------|------|
| ATOM | 28022 | CG1  | ILE | 1865 | 64.316 | 93.757 | 84.507 | 0.00 | 0.00 |
| ATOM | 28023 | 2HG1 | ILE | 1865 | 63.946 | 92.771 | 84.790 | 0.00 | 0.00 |
| ATOM | 28024 | 3HG1 | ILE | 1865 | 63.527 | 94.353 | 84.049 | 0.00 | 0.00 |
| ATOM | 28025 | CD1  | ILE | 1865 | 65.358 | 93.493 | 83.355 | 0.00 | 0.00 |
| ATOM | 28026 | 1HD1 | ILE | 1865 | 66.188 | 92.833 | 83.610 | 0.00 | 0.00 |
| ATOM | 28027 | 2HD1 | ILE | 1865 | 64.946 | 93.063 | 82.442 | 0.00 | 0.00 |
| ATOM | 28028 | 3HD1 | ILE | 1865 | 65.829 | 94.431 | 83.061 | 0.00 | 0.00 |
| ATOM | 28029 | C    | ILE | 1865 | 64.308 | 95.126 | 88.262 | 0.00 | 0.00 |
| ATOM | 28030 | O    | ILE | 1865 | 64.332 | 96.380 | 88.314 | 0.00 | 0.00 |
| ATOM | 28031 | N    | ALA | 1866 | 64.868 | 94.437 | 89.238 | 0.00 | 0.00 |
| ATOM | 28032 | H    | ALA | 1866 | 65.138 | 93.481 | 89.053 | 0.00 | 0.00 |
| ATOM | 28033 | CA   | ALA | 1866 | 65.328 | 95.006 | 90.479 | 0.00 | 0.00 |
| ATOM | 28034 | HA   | ALA | 1866 | 64.787 | 95.906 | 90.774 | 0.00 | 0.00 |
| ATOM | 28035 | CB   | ALA | 1866 | 64.775 | 94.128 | 91.644 | 0.00 | 0.00 |
| ATOM | 28036 | HB1  | ALA | 1866 | 63.695 | 93.985 | 91.611 | 0.00 | 0.00 |
| ATOM | 28037 | HB2  | ALA | 1866 | 65.257 | 93.158 | 91.523 | 0.00 | 0.00 |
| ATOM | 28038 | HB3  | ALA | 1866 | 65.085 | 94.383 | 92.657 | 0.00 | 0.00 |
| ATOM | 28039 | C    | ALA | 1866 | 66.822 | 95.094 | 90.450 | 0.00 | 0.00 |
| ATOM | 28040 | O    | ALA | 1866 | 67.439 | 94.052 | 90.335 | 0.00 | 0.00 |
| ATOM | 28041 | N    | ALA | 1867 | 67.480 | 96.314 | 90.616 | 0.00 | 0.00 |
| ATOM | 28042 | H    | ALA | 1867 | 66.897 | 97.135 | 90.541 | 0.00 | 0.00 |
| ATOM | 28043 | CA   | ALA | 1867 | 68.880 | 96.458 | 90.919 | 0.00 | 0.00 |
| ATOM | 28044 | HA   | ALA | 1867 | 69.379 | 95.572 | 90.527 | 0.00 | 0.00 |
| ATOM | 28045 | CB   | ALA | 1867 | 69.451 | 97.612 | 90.114 | 0.00 | 0.00 |
| ATOM | 28046 | HB1  | ALA | 1867 | 70.486 | 97.798 | 90.402 | 0.00 | 0.00 |
| ATOM | 28047 | HB2  | ALA | 1867 | 69.428 | 97.531 | 89.028 | 0.00 | 0.00 |

|      |       |     |     |      |        |         |        |      |      |
|------|-------|-----|-----|------|--------|---------|--------|------|------|
| ATOM | 28048 | HB3 | ALA | 1867 | 68.934 | 98.543  | 90.347 | 0.00 | 0.00 |
| ATOM | 28049 | C   | ALA | 1867 | 69.194 | 96.459  | 92.436 | 0.00 | 0.00 |
| ATOM | 28050 | O   | ALA | 1867 | 70.233 | 95.910  | 92.804 | 0.00 | 0.00 |
| ATOM | 28051 | N   | GLU | 1868 | 68.403 | 96.981  | 93.344 | 0.00 | 0.00 |
| ATOM | 28052 | H   | GLU | 1868 | 67.482 | 97.247  | 93.027 | 0.00 | 0.00 |
| ATOM | 28053 | CA  | GLU | 1868 | 68.782 | 97.154  | 94.756 | 0.00 | 0.00 |
| ATOM | 28054 | HA  | GLU | 1868 | 68.044 | 97.811  | 95.215 | 0.00 | 0.00 |
| ATOM | 28055 | CB  | GLU | 1868 | 68.515 | 95.881  | 95.442 | 0.00 | 0.00 |
| ATOM | 28056 | HB2 | GLU | 1868 | 69.218 | 95.162  | 95.020 | 0.00 | 0.00 |
| ATOM | 28057 | HB3 | GLU | 1868 | 68.739 | 95.845  | 96.508 | 0.00 | 0.00 |
| ATOM | 28058 | CG  | GLU | 1868 | 67.005 | 95.364  | 95.229 | 0.00 | 0.00 |
| ATOM | 28059 | HG2 | GLU | 1868 | 66.687 | 95.507  | 94.196 | 0.00 | 0.00 |
| ATOM | 28060 | HG3 | GLU | 1868 | 66.927 | 94.310  | 95.499 | 0.00 | 0.00 |
| ATOM | 28061 | CD  | GLU | 1868 | 66.050 | 96.081  | 96.157 | 0.00 | 0.00 |
| ATOM | 28062 | OE1 | GLU | 1868 | 66.568 | 96.739  | 97.087 | 0.00 | 0.00 |
| ATOM | 28063 | OE2 | GLU | 1868 | 64.806 | 95.858  | 96.176 | 0.00 | 0.00 |
| ATOM | 28064 | C   | GLU | 1868 | 70.193 | 97.775  | 94.951 | 0.00 | 0.00 |
| ATOM | 28065 | O   | GLU | 1868 | 70.953 | 97.438  | 95.859 | 0.00 | 0.00 |
| ATOM | 28066 | N   | GLY | 1869 | 70.625 | 98.687  | 94.056 | 0.00 | 0.00 |
| ATOM | 28067 | H   | GLY | 1869 | 70.022 | 99.028  | 93.321 | 0.00 | 0.00 |
| ATOM | 28068 | CA  | GLY | 1869 | 71.904 | 99.418  | 94.035 | 0.00 | 0.00 |
| ATOM | 28069 | HA2 | GLY | 1869 | 71.759 | 100.391 | 93.566 | 0.00 | 0.00 |
| ATOM | 28070 | HA3 | GLY | 1869 | 72.140 | 99.471  | 95.098 | 0.00 | 0.00 |
| ATOM | 28071 | C   | GLY | 1869 | 73.042 | 98.804  | 93.300 | 0.00 | 0.00 |
| ATOM | 28072 | O   | GLY | 1869 | 74.168 | 99.300  | 93.278 | 0.00 | 0.00 |
| ATOM | 28073 | N   | LYS | 1870 | 72.802 | 97.595  | 92.754 | 0.00 | 0.00 |

|      |       |     |     |      |        |        |        |      |      |
|------|-------|-----|-----|------|--------|--------|--------|------|------|
| ATOM | 28074 | H   | LYS | 1870 | 71.853 | 97.262 | 92.847 | 0.00 | 0.00 |
| ATOM | 28075 | CA  | LYS | 1870 | 73.676 | 97.019 | 91.680 | 0.00 | 0.00 |
| ATOM | 28076 | HA  | LYS | 1870 | 74.682 | 96.807 | 92.040 | 0.00 | 0.00 |
| ATOM | 28077 | CB  | LYS | 1870 | 73.006 | 95.840 | 91.086 | 0.00 | 0.00 |
| ATOM | 28078 | HB2 | LYS | 1870 | 72.016 | 96.146 | 90.750 | 0.00 | 0.00 |
| ATOM | 28079 | HB3 | LYS | 1870 | 73.577 | 95.379 | 90.280 | 0.00 | 0.00 |
| ATOM | 28080 | CG  | LYS | 1870 | 72.849 | 94.732 | 92.133 | 0.00 | 0.00 |
| ATOM | 28081 | HG2 | LYS | 1870 | 73.827 | 94.325 | 92.389 | 0.00 | 0.00 |
| ATOM | 28082 | HG3 | LYS | 1870 | 72.545 | 95.091 | 93.116 | 0.00 | 0.00 |
| ATOM | 28083 | CD  | LYS | 1870 | 71.971 | 93.504 | 91.615 | 0.00 | 0.00 |
| ATOM | 28084 | HD2 | LYS | 1870 | 70.941 | 93.725 | 91.337 | 0.00 | 0.00 |
| ATOM | 28085 | HD3 | LYS | 1870 | 72.481 | 93.084 | 90.748 | 0.00 | 0.00 |
| ATOM | 28086 | CE  | LYS | 1870 | 71.821 | 92.483 | 92.791 | 0.00 | 0.00 |
| ATOM | 28087 | HE2 | LYS | 1870 | 71.340 | 91.609 | 92.352 | 0.00 | 0.00 |
| ATOM | 28088 | HE3 | LYS | 1870 | 72.747 | 92.206 | 93.295 | 0.00 | 0.00 |
| ATOM | 28089 | NZ  | LYS | 1870 | 70.866 | 93.141 | 93.763 | 0.00 | 0.00 |
| ATOM | 28090 | HZ1 | LYS | 1870 | 71.101 | 94.093 | 94.003 | 0.00 | 0.00 |
| ATOM | 28091 | HZ2 | LYS | 1870 | 69.957 | 93.220 | 93.329 | 0.00 | 0.00 |
| ATOM | 28092 | HZ3 | LYS | 1870 | 70.677 | 92.558 | 94.566 | 0.00 | 0.00 |
| ATOM | 28093 | C   | LYS | 1870 | 73.889 | 98.150 | 90.611 | 0.00 | 0.00 |
| ATOM | 28094 | O   | LYS | 1870 | 73.087 | 99.099 | 90.407 | 0.00 | 0.00 |
| ATOM | 28095 | N   | ILE | 1871 | 74.906 | 97.976 | 89.829 | 0.00 | 0.00 |
| ATOM | 28096 | H   | ILE | 1871 | 75.485 | 97.169 | 90.010 | 0.00 | 0.00 |
| ATOM | 28097 | CA  | ILE | 1871 | 75.420 | 98.961 | 88.885 | 0.00 | 0.00 |
| ATOM | 28098 | HA  | ILE | 1871 | 74.909 | 99.880 | 89.172 | 0.00 | 0.00 |
| ATOM | 28099 | CB  | ILE | 1871 | 76.916 | 99.111 | 89.199 | 0.00 | 0.00 |

|      |       |      |     |      |        |         |        |      |      |
|------|-------|------|-----|------|--------|---------|--------|------|------|
| ATOM | 28100 | HB   | ILE | 1871 | 77.490 | 98.252  | 88.851 | 0.00 | 0.00 |
| ATOM | 28101 | CG2  | ILE | 1871 | 77.376 | 100.273 | 88.322 | 0.00 | 0.00 |
| ATOM | 28102 | 1HG2 | ILE | 1871 | 78.394 | 100.620 | 88.501 | 0.00 | 0.00 |
| ATOM | 28103 | 2HG2 | ILE | 1871 | 77.249 | 100.029 | 87.267 | 0.00 | 0.00 |
| ATOM | 28104 | 3HG2 | ILE | 1871 | 76.738 | 101.130 | 88.536 | 0.00 | 0.00 |
| ATOM | 28105 | CG1  | ILE | 1871 | 77.260 | 99.576  | 90.717 | 0.00 | 0.00 |
| ATOM | 28106 | 2HG1 | ILE | 1871 | 76.723 | 100.493 | 90.959 | 0.00 | 0.00 |
| ATOM | 28107 | 3HG1 | ILE | 1871 | 76.796 | 98.922  | 91.455 | 0.00 | 0.00 |
| ATOM | 28108 | CD1  | ILE | 1871 | 78.769 | 99.589  | 90.967 | 0.00 | 0.00 |
| ATOM | 28109 | 1HD1 | ILE | 1871 | 78.939 | 99.463  | 92.036 | 0.00 | 0.00 |
| ATOM | 28110 | 2HD1 | ILE | 1871 | 79.218 | 98.761  | 90.418 | 0.00 | 0.00 |
| ATOM | 28111 | 3HD1 | ILE | 1871 | 79.349 | 100.480 | 90.729 | 0.00 | 0.00 |
| ATOM | 28112 | C    | ILE | 1871 | 75.120 | 98.603  | 87.444 | 0.00 | 0.00 |
| ATOM | 28113 | O    | ILE | 1871 | 75.351 | 97.436  | 87.016 | 0.00 | 0.00 |
| ATOM | 28114 | N    | VAL | 1872 | 74.605 | 99.568  | 86.655 | 0.00 | 0.00 |
| ATOM | 28115 | H    | VAL | 1872 | 74.521 | 100.463 | 87.116 | 0.00 | 0.00 |
| ATOM | 28116 | CA   | VAL | 1872 | 74.206 | 99.332  | 85.286 | 0.00 | 0.00 |
| ATOM | 28117 | HA   | VAL | 1872 | 74.292 | 98.264  | 85.090 | 0.00 | 0.00 |
| ATOM | 28118 | CB   | VAL | 1872 | 72.729 | 99.619  | 84.994 | 0.00 | 0.00 |
| ATOM | 28119 | HB   | VAL | 1872 | 71.975 | 99.085  | 85.573 | 0.00 | 0.00 |
| ATOM | 28120 | CG1  | VAL | 1872 | 72.340 | 101.085 | 84.884 | 0.00 | 0.00 |
| ATOM | 28121 | 1HG1 | VAL | 1872 | 72.909 | 101.523 | 84.064 | 0.00 | 0.00 |
| ATOM | 28122 | 2HG1 | VAL | 1872 | 71.280 | 101.193 | 84.656 | 0.00 | 0.00 |
| ATOM | 28123 | 3HG1 | VAL | 1872 | 72.593 | 101.525 | 85.849 | 0.00 | 0.00 |
| ATOM | 28124 | CG2  | VAL | 1872 | 72.424 | 99.217  | 83.499 | 0.00 | 0.00 |
| ATOM | 28125 | 1HG2 | VAL | 1872 | 73.126 | 99.662  | 82.794 | 0.00 | 0.00 |

|      |       |      |     |      |        |         |        |      |      |
|------|-------|------|-----|------|--------|---------|--------|------|------|
| ATOM | 28126 | 2HG2 | VAL | 1872 | 72.336 | 98.135  | 83.406 | 0.00 | 0.00 |
| ATOM | 28127 | 3HG2 | VAL | 1872 | 71.411 | 99.520  | 83.236 | 0.00 | 0.00 |
| ATOM | 28128 | C    | VAL | 1872 | 75.190 | 99.977  | 84.284 | 0.00 | 0.00 |
| ATOM | 28129 | O    | VAL | 1872 | 75.612 | 101.128 | 84.481 | 0.00 | 0.00 |
| ATOM | 28130 | N    | THR | 1873 | 75.512 | 99.318  | 83.185 | 0.00 | 0.00 |
| ATOM | 28131 | H    | THR | 1873 | 75.129 | 98.389  | 83.086 | 0.00 | 0.00 |
| ATOM | 28132 | CA   | THR | 1873 | 76.308 | 99.868  | 82.101 | 0.00 | 0.00 |
| ATOM | 28133 | HA   | THR | 1873 | 76.177 | 100.949 | 82.131 | 0.00 | 0.00 |
| ATOM | 28134 | CB   | THR | 1873 | 77.805 | 99.439  | 82.239 | 0.00 | 0.00 |
| ATOM | 28135 | HB   | THR | 1873 | 78.274 | 99.888  | 81.364 | 0.00 | 0.00 |
| ATOM | 28136 | CG2  | THR | 1873 | 78.503 | 99.853  | 83.526 | 0.00 | 0.00 |
| ATOM | 28137 | 1HG2 | THR | 1873 | 79.457 | 99.327  | 83.529 | 0.00 | 0.00 |
| ATOM | 28138 | 2HG2 | THR | 1873 | 78.521 | 100.939 | 83.433 | 0.00 | 0.00 |
| ATOM | 28139 | 3HG2 | THR | 1873 | 78.037 | 99.499  | 84.446 | 0.00 | 0.00 |
| ATOM | 28140 | OG1  | THR | 1873 | 78.024 | 98.043  | 82.302 | 0.00 | 0.00 |
| ATOM | 28141 | HG1  | THR | 1873 | 77.151 | 97.748  | 82.032 | 0.00 | 0.00 |
| ATOM | 28142 | C    | THR | 1873 | 75.837 | 99.476  | 80.722 | 0.00 | 0.00 |
| ATOM | 28143 | O    | THR | 1873 | 75.338 | 98.384  | 80.514 | 0.00 | 0.00 |
| ATOM | 28144 | N    | ALA | 1874 | 75.952 | 100.376 | 79.703 | 0.00 | 0.00 |
| ATOM | 28145 | H    | ALA | 1874 | 76.372 | 101.256 | 79.966 | 0.00 | 0.00 |
| ATOM | 28146 | CA   | ALA | 1874 | 75.483 | 100.103 | 78.300 | 0.00 | 0.00 |
| ATOM | 28147 | HA   | ALA | 1874 | 74.476 | 99.690  | 78.342 | 0.00 | 0.00 |
| ATOM | 28148 | CB   | ALA | 1874 | 75.426 | 101.434 | 77.488 | 0.00 | 0.00 |
| ATOM | 28149 | HB1  | ALA | 1874 | 76.200 | 101.452 | 76.720 | 0.00 | 0.00 |
| ATOM | 28150 | HB2  | ALA | 1874 | 74.414 | 101.587 | 77.113 | 0.00 | 0.00 |
| ATOM | 28151 | HB3  | ALA | 1874 | 75.803 | 102.250 | 78.105 | 0.00 | 0.00 |

|      |       |      |     |      |        |        |        |      |      |
|------|-------|------|-----|------|--------|--------|--------|------|------|
| ATOM | 28152 | C    | ALA | 1874 | 76.257 | 99.048 | 77.533 | 0.00 | 0.00 |
| ATOM | 28153 | O    | ALA | 1874 | 77.316 | 98.589 | 78.029 | 0.00 | 0.00 |
| ATOM | 28154 | N    | GLY | 1875 | 75.630 | 98.595 | 76.467 | 0.00 | 0.00 |
| ATOM | 28155 | H    | GLY | 1875 | 74.776 | 99.051 | 76.178 | 0.00 | 0.00 |
| ATOM | 28156 | CA   | GLY | 1875 | 76.178 | 97.410 | 75.793 | 0.00 | 0.00 |
| ATOM | 28157 | HA2  | GLY | 1875 | 76.195 | 96.642 | 76.566 | 0.00 | 0.00 |
| ATOM | 28158 | HA3  | GLY | 1875 | 75.468 | 97.157 | 75.005 | 0.00 | 0.00 |
| ATOM | 28159 | C    | GLY | 1875 | 77.594 | 97.526 | 75.249 | 0.00 | 0.00 |
| ATOM | 28160 | O    | GLY | 1875 | 77.793 | 98.286 | 74.296 | 0.00 | 0.00 |
| ATOM | 28161 | N    | GLY | 1876 | 78.563 | 96.796 | 75.682 | 0.00 | 0.00 |
| ATOM | 28162 | H    | GLY | 1876 | 78.405 | 96.130 | 76.425 | 0.00 | 0.00 |
| ATOM | 28163 | CA   | GLY | 1876 | 79.931 | 96.866 | 75.210 | 0.00 | 0.00 |
| ATOM | 28164 | HA2  | GLY | 1876 | 80.426 | 97.680 | 75.740 | 0.00 | 0.00 |
| ATOM | 28165 | HA3  | GLY | 1876 | 80.353 | 95.925 | 75.562 | 0.00 | 0.00 |
| ATOM | 28166 | C    | GLY | 1876 | 79.961 | 96.768 | 73.681 | 0.00 | 0.00 |
| ATOM | 28167 | O    | GLY | 1876 | 79.243 | 95.894 | 73.173 | 0.00 | 0.00 |
| ATOM | 28168 | N    | ILE | 1877 | 80.869 | 97.436 | 73.000 | 0.00 | 0.00 |
| ATOM | 28169 | H    | ILE | 1877 | 81.496 | 97.964 | 73.591 | 0.00 | 0.00 |
| ATOM | 28170 | CA   | ILE | 1877 | 81.322 | 97.366 | 71.560 | 0.00 | 0.00 |
| ATOM | 28171 | HA   | ILE | 1877 | 80.737 | 96.584 | 71.075 | 0.00 | 0.00 |
| ATOM | 28172 | CB   | ILE | 1877 | 80.933 | 98.715 | 70.811 | 0.00 | 0.00 |
| ATOM | 28173 | HB   | ILE | 1877 | 81.596 | 99.441 | 71.283 | 0.00 | 0.00 |
| ATOM | 28174 | CG2  | ILE | 1877 | 81.158 | 98.538 | 69.325 | 0.00 | 0.00 |
| ATOM | 28175 | 1HG2 | ILE | 1877 | 80.379 | 97.900 | 68.906 | 0.00 | 0.00 |
| ATOM | 28176 | 2HG2 | ILE | 1877 | 81.171 | 99.447 | 68.724 | 0.00 | 0.00 |
| ATOM | 28177 | 3HG2 | ILE | 1877 | 82.036 | 97.934 | 69.093 | 0.00 | 0.00 |

|      |       |      |     |      |        |         |        |      |      |
|------|-------|------|-----|------|--------|---------|--------|------|------|
| ATOM | 28178 | CG1  | ILE | 1877 | 79.486 | 99.211  | 71.086 | 0.00 | 0.00 |
| ATOM | 28179 | 2HG1 | ILE | 1877 | 78.735 | 98.437  | 70.930 | 0.00 | 0.00 |
| ATOM | 28180 | 3HG1 | ILE | 1877 | 79.410 | 99.582  | 72.108 | 0.00 | 0.00 |
| ATOM | 28181 | CD1  | ILE | 1877 | 79.111 | 100.300 | 70.156 | 0.00 | 0.00 |
| ATOM | 28182 | 1HD1 | ILE | 1877 | 79.955 | 100.977 | 70.020 | 0.00 | 0.00 |
| ATOM | 28183 | 2HD1 | ILE | 1877 | 78.724 | 99.945  | 69.201 | 0.00 | 0.00 |
| ATOM | 28184 | 3HD1 | ILE | 1877 | 78.345 | 100.817 | 70.733 | 0.00 | 0.00 |
| ATOM | 28185 | C    | ILE | 1877 | 82.835 | 97.101  | 71.497 | 0.00 | 0.00 |
| ATOM | 28186 | O    | ILE | 1877 | 83.538 | 98.054  | 71.844 | 0.00 | 0.00 |
| ATOM | 28187 | N    | ASP | 1878 | 83.326 | 95.997  | 70.901 | 0.00 | 0.00 |
| ATOM | 28188 | H    | ASP | 1878 | 82.695 | 95.320  | 70.496 | 0.00 | 0.00 |
| ATOM | 28189 | CA   | ASP | 1878 | 84.769 | 95.882  | 70.584 | 0.00 | 0.00 |
| ATOM | 28190 | HA   | ASP | 1878 | 85.195 | 96.659  | 71.219 | 0.00 | 0.00 |
| ATOM | 28191 | CB   | ASP | 1878 | 85.360 | 94.489  | 70.992 | 0.00 | 0.00 |
| ATOM | 28192 | HB2  | ASP | 1878 | 85.122 | 94.289  | 72.037 | 0.00 | 0.00 |
| ATOM | 28193 | HB3  | ASP | 1878 | 84.916 | 93.675  | 70.418 | 0.00 | 0.00 |
| ATOM | 28194 | CG   | ASP | 1878 | 86.903 | 94.583  | 70.699 | 0.00 | 0.00 |
| ATOM | 28195 | OD1  | ASP | 1878 | 87.399 | 94.003  | 69.760 | 0.00 | 0.00 |
| ATOM | 28196 | OD2  | ASP | 1878 | 87.481 | 95.470  | 71.326 | 0.00 | 0.00 |
| ATOM | 28197 | C    | ASP | 1878 | 84.991 | 96.261  | 69.127 | 0.00 | 0.00 |
| ATOM | 28198 | O    | ASP | 1878 | 84.054 | 96.074  | 68.281 | 0.00 | 0.00 |
| ATOM | 28199 | N    | THR | 1879 | 86.194 | 96.754  | 68.800 | 0.00 | 0.00 |
| ATOM | 28200 | H    | THR | 1879 | 86.884 | 96.788  | 69.537 | 0.00 | 0.00 |
| ATOM | 28201 | CA   | THR | 1879 | 86.522 | 97.255  | 67.401 | 0.00 | 0.00 |
| ATOM | 28202 | HA   | THR | 1879 | 85.728 | 97.649  | 66.767 | 0.00 | 0.00 |
| ATOM | 28203 | CB   | THR | 1879 | 87.495 | 98.427  | 67.519 | 0.00 | 0.00 |



|      |       |      |     |      |        |         |        |      |      |
|------|-------|------|-----|------|--------|---------|--------|------|------|
| ATOM | 28204 | HB   | THR | 1879 | 87.815 | 98.700  | 66.513 | 0.00 | 0.00 |
| ATOM | 28205 | CG2  | THR | 1879 | 86.958 | 99.713  | 68.127 | 0.00 | 0.00 |
| ATOM | 28206 | 1HG2 | THR | 1879 | 86.104 | 100.169 | 67.628 | 0.00 | 0.00 |
| ATOM | 28207 | 2HG2 | THR | 1879 | 86.700 | 99.577  | 69.177 | 0.00 | 0.00 |
| ATOM | 28208 | 3HG2 | THR | 1879 | 87.818 | 100.382 | 68.155 | 0.00 | 0.00 |
| ATOM | 28209 | OG1  | THR | 1879 | 88.681 | 97.976  | 68.233 | 0.00 | 0.00 |
| ATOM | 28210 | HG1  | THR | 1879 | 88.759 | 98.509  | 69.028 | 0.00 | 0.00 |
| ATOM | 28211 | C    | THR | 1879 | 87.183 | 96.164  | 66.465 | 0.00 | 0.00 |
| ATOM | 28212 | O    | THR | 1879 | 87.517 | 96.446  | 65.324 | 0.00 | 0.00 |
| ATOM | 28213 | N    | H21 | 1880 | 87.562 | 95.010  | 66.926 | 0.00 | 0.00 |
| ATOM | 28214 | H    | H21 | 1880 | 87.585 | 94.848  | 67.922 | 0.00 | 0.00 |
| ATOM | 28215 | CA   | H21 | 1880 | 88.481 | 94.041  | 66.305 | 0.00 | 0.00 |
| ATOM | 28216 | HA   | H21 | 1880 | 88.471 | 94.238  | 65.233 | 0.00 | 0.00 |
| ATOM | 28217 | CB   | H21 | 1880 | 89.879 | 94.461  | 66.830 | 0.00 | 0.00 |
| ATOM | 28218 | HB2  | H21 | 1880 | 89.927 | 95.548  | 66.893 | 0.00 | 0.00 |
| ATOM | 28219 | HB3  | H21 | 1880 | 90.080 | 93.974  | 67.784 | 0.00 | 0.00 |
| ATOM | 28220 | CG   | H21 | 1880 | 90.992 | 94.065  | 65.958 | 0.00 | 0.00 |
| ATOM | 28221 | ND1  | H21 | 1880 | 91.989 | 94.908  | 65.425 | 0.00 | 0.00 |
| ATOM | 28222 | HD1  | H21 | 1880 | 92.054 | 95.914  | 65.477 | 0.00 | 0.00 |
| ATOM | 28223 | CE1  | H21 | 1880 | 93.081 | 94.171  | 65.031 | 0.00 | 0.00 |
| ATOM | 28224 | HE1  | H21 | 1880 | 94.007 | 94.582  | 64.657 | 0.00 | 0.00 |
| ATOM | 28225 | NE2  | H21 | 1880 | 92.737 | 92.862  | 65.193 | 0.00 | 0.00 |
| ATOM | 28226 | CD2  | H21 | 1880 | 91.442 | 92.856  | 65.755 | 0.00 | 0.00 |
| ATOM | 28227 | HD2  | H21 | 1880 | 90.947 | 91.955  | 66.086 | 0.00 | 0.00 |
| ATOM | 28228 | C    | H21 | 1880 | 88.074 | 92.627  | 66.630 | 0.00 | 0.00 |
| ATOM | 28229 | O    | H21 | 1880 | 88.930 | 91.975  | 67.161 | 0.00 | 0.00 |

|      |       |      |     |      |        |        |        |      |      |
|------|-------|------|-----|------|--------|--------|--------|------|------|
| ATOM | 28230 | N    | ILE | 1881 | 86.876 | 92.132 | 66.279 | 0.00 | 0.00 |
| ATOM | 28231 | H    | ILE | 1881 | 86.261 | 92.869 | 65.965 | 0.00 | 0.00 |
| ATOM | 28232 | CA   | ILE | 1881 | 86.468 | 90.778 | 66.440 | 0.00 | 0.00 |
| ATOM | 28233 | HA   | ILE | 1881 | 86.990 | 90.373 | 67.307 | 0.00 | 0.00 |
| ATOM | 28234 | CB   | ILE | 1881 | 84.986 | 90.733 | 66.690 | 0.00 | 0.00 |
| ATOM | 28235 | HB   | ILE | 1881 | 84.426 | 91.380 | 66.014 | 0.00 | 0.00 |
| ATOM | 28236 | CG2  | ILE | 1881 | 84.508 | 89.272 | 66.500 | 0.00 | 0.00 |
| ATOM | 28237 | 1HG2 | ILE | 1881 | 84.992 | 88.521 | 67.124 | 0.00 | 0.00 |
| ATOM | 28238 | 2HG2 | ILE | 1881 | 83.461 | 89.215 | 66.799 | 0.00 | 0.00 |
| ATOM | 28239 | 3HG2 | ILE | 1881 | 84.650 | 88.949 | 65.468 | 0.00 | 0.00 |
| ATOM | 28240 | CG1  | ILE | 1881 | 84.706 | 91.287 | 68.121 | 0.00 | 0.00 |
| ATOM | 28241 | 2HG1 | ILE | 1881 | 85.322 | 92.177 | 68.254 | 0.00 | 0.00 |
| ATOM | 28242 | 3HG1 | ILE | 1881 | 83.674 | 91.633 | 68.077 | 0.00 | 0.00 |
| ATOM | 28243 | CD1  | ILE | 1881 | 84.834 | 90.380 | 69.357 | 0.00 | 0.00 |
| ATOM | 28244 | 1HD1 | ILE | 1881 | 84.010 | 89.680 | 69.219 | 0.00 | 0.00 |
| ATOM | 28245 | 2HD1 | ILE | 1881 | 85.806 | 89.911 | 69.507 | 0.00 | 0.00 |
| ATOM | 28246 | 3HD1 | ILE | 1881 | 84.646 | 91.086 | 70.166 | 0.00 | 0.00 |
| ATOM | 28247 | C    | ILE | 1881 | 86.858 | 89.927 | 65.240 | 0.00 | 0.00 |
| ATOM | 28248 | O    | ILE | 1881 | 86.343 | 90.204 | 64.150 | 0.00 | 0.00 |
| ATOM | 28249 | N    | H22 | 1882 | 87.733 | 88.976 | 65.438 | 0.00 | 0.00 |
| ATOM | 28250 | H    | H22 | 1882 | 87.909 | 88.747 | 66.406 | 0.00 | 0.00 |
| ATOM | 28251 | CA   | H22 | 1882 | 88.140 | 88.097 | 64.344 | 0.00 | 0.00 |
| ATOM | 28252 | HA   | H22 | 1882 | 88.140 | 88.615 | 63.385 | 0.00 | 0.00 |
| ATOM | 28253 | CB   | H22 | 1882 | 89.611 | 87.707 | 64.737 | 0.00 | 0.00 |
| ATOM | 28254 | HB2  | H22 | 1882 | 89.749 | 87.580 | 65.811 | 0.00 | 0.00 |
| ATOM | 28255 | HB3  | H22 | 1882 | 89.885 | 86.835 | 64.144 | 0.00 | 0.00 |

|      |       |     |     |      |        |        |        |      |      |
|------|-------|-----|-----|------|--------|--------|--------|------|------|
| ATOM | 28256 | CG  | H22 | 1882 | 90.682 | 88.648 | 64.272 | 0.00 | 0.00 |
| ATOM | 28257 | ND1 | H22 | 1882 | 91.450 | 88.464 | 63.083 | 0.00 | 0.00 |
| ATOM | 28258 | HD1 | H22 | 1882 | 91.148 | 87.846 | 62.344 | 0.00 | 0.00 |
| ATOM | 28259 | CE1 | H22 | 1882 | 92.466 | 89.309 | 63.054 | 0.00 | 0.00 |
| ATOM | 28260 | HE1 | H22 | 1882 | 93.283 | 89.308 | 62.348 | 0.00 | 0.00 |
| ATOM | 28261 | NE2 | H22 | 1882 | 92.416 | 89.971 | 64.202 | 0.00 | 0.00 |
| ATOM | 28262 | CD2 | H22 | 1882 | 91.382 | 89.535 | 65.000 | 0.00 | 0.00 |
| ATOM | 28263 | HD2 | H22 | 1882 | 91.240 | 89.831 | 66.029 | 0.00 | 0.00 |
| ATOM | 28264 | C   | H22 | 1882 | 87.182 | 86.846 | 64.231 | 0.00 | 0.00 |
| ATOM | 28265 | O   | H22 | 1882 | 87.120 | 85.972 | 65.065 | 0.00 | 0.00 |
| ATOM | 28266 | N   | TRP | 1883 | 86.602 | 86.645 | 63.021 | 0.00 | 0.00 |
| ATOM | 28267 | H   | TRP | 1883 | 86.839 | 87.389 | 62.380 | 0.00 | 0.00 |
| ATOM | 28268 | CA  | TRP | 1883 | 85.535 | 85.744 | 62.752 | 0.00 | 0.00 |
| ATOM | 28269 | HA  | TRP | 1883 | 85.030 | 85.653 | 63.713 | 0.00 | 0.00 |
| ATOM | 28270 | CB  | TRP | 1883 | 84.435 | 86.241 | 61.803 | 0.00 | 0.00 |
| ATOM | 28271 | HB2 | TRP | 1883 | 84.914 | 86.441 | 60.844 | 0.00 | 0.00 |
| ATOM | 28272 | HB3 | TRP | 1883 | 83.761 | 85.410 | 61.595 | 0.00 | 0.00 |
| ATOM | 28273 | CG  | TRP | 1883 | 83.585 | 87.385 | 62.214 | 0.00 | 0.00 |
| ATOM | 28274 | CD1 | TRP | 1883 | 83.231 | 88.540 | 61.460 | 0.00 | 0.00 |
| ATOM | 28275 | HD1 | TRP | 1883 | 83.588 | 88.724 | 60.457 | 0.00 | 0.00 |
| ATOM | 28276 | NE1 | TRP | 1883 | 82.425 | 89.421 | 62.186 | 0.00 | 0.00 |
| ATOM | 28277 | HE1 | TRP | 1883 | 82.098 | 90.310 | 61.836 | 0.00 | 0.00 |
| ATOM | 28278 | CE2 | TRP | 1883 | 82.122 | 88.829 | 63.361 | 0.00 | 0.00 |
| ATOM | 28279 | CZ2 | TRP | 1883 | 81.364 | 89.280 | 64.392 | 0.00 | 0.00 |
| ATOM | 28280 | HZ2 | TRP | 1883 | 81.028 | 90.306 | 64.379 | 0.00 | 0.00 |
| ATOM | 28281 | CH2 | TRP | 1883 | 81.251 | 88.478 | 65.529 | 0.00 | 0.00 |

|      |       |      |     |      |        |        |        |      |      |
|------|-------|------|-----|------|--------|--------|--------|------|------|
| ATOM | 28282 | HH2  | TRP | 1883 | 80.660 | 88.802 | 66.373 | 0.00 | 0.00 |
| ATOM | 28283 | CZ3  | TRP | 1883 | 81.815 | 87.213 | 65.549 | 0.00 | 0.00 |
| ATOM | 28284 | HZ3  | TRP | 1883 | 81.678 | 86.552 | 66.392 | 0.00 | 0.00 |
| ATOM | 28285 | CE3  | TRP | 1883 | 82.594 | 86.732 | 64.483 | 0.00 | 0.00 |
| ATOM | 28286 | HE3  | TRP | 1883 | 83.161 | 85.814 | 64.537 | 0.00 | 0.00 |
| ATOM | 28287 | CD2  | TRP | 1883 | 82.770 | 87.542 | 63.379 | 0.00 | 0.00 |
| ATOM | 28288 | C    | TRP | 1883 | 85.999 | 84.323 | 62.408 | 0.00 | 0.00 |
| ATOM | 28289 | O    | TRP | 1883 | 85.687 | 83.723 | 61.430 | 0.00 | 0.00 |
| ATOM | 28290 | N    | ILE | 1884 | 86.929 | 83.827 | 63.248 | 0.00 | 0.00 |
| ATOM | 28291 | H    | ILE | 1884 | 87.121 | 84.312 | 64.113 | 0.00 | 0.00 |
| ATOM | 28292 | CA   | ILE | 1884 | 87.505 | 82.435 | 63.215 | 0.00 | 0.00 |
| ATOM | 28293 | HA   | ILE | 1884 | 87.707 | 82.053 | 62.214 | 0.00 | 0.00 |
| ATOM | 28294 | CB   | ILE | 1884 | 88.901 | 82.392 | 63.895 | 0.00 | 0.00 |
| ATOM | 28295 | HB   | ILE | 1884 | 88.765 | 82.151 | 64.949 | 0.00 | 0.00 |
| ATOM | 28296 | CG2  | ILE | 1884 | 89.565 | 81.152 | 63.149 | 0.00 | 0.00 |
| ATOM | 28297 | 1HG2 | ILE | 1884 | 90.613 | 81.105 | 63.443 | 0.00 | 0.00 |
| ATOM | 28298 | 2HG2 | ILE | 1884 | 88.994 | 80.248 | 63.361 | 0.00 | 0.00 |
| ATOM | 28299 | 3HG2 | ILE | 1884 | 89.571 | 81.376 | 62.083 | 0.00 | 0.00 |
| ATOM | 28300 | CG1  | ILE | 1884 | 89.697 | 83.704 | 63.978 | 0.00 | 0.00 |
| ATOM | 28301 | 2HG1 | ILE | 1884 | 89.718 | 84.153 | 62.985 | 0.00 | 0.00 |
| ATOM | 28302 | 3HG1 | ILE | 1884 | 89.149 | 84.457 | 64.544 | 0.00 | 0.00 |
| ATOM | 28303 | CD1  | ILE | 1884 | 91.116 | 83.540 | 64.462 | 0.00 | 0.00 |
| ATOM | 28304 | 1HD1 | ILE | 1884 | 91.232 | 83.111 | 65.458 | 0.00 | 0.00 |
| ATOM | 28305 | 2HD1 | ILE | 1884 | 91.716 | 82.915 | 63.801 | 0.00 | 0.00 |
| ATOM | 28306 | 3HD1 | ILE | 1884 | 91.406 | 84.567 | 64.683 | 0.00 | 0.00 |
| ATOM | 28307 | C    | ILE | 1884 | 86.534 | 81.407 | 63.802 | 0.00 | 0.00 |

|      |       |     |     |      |        |        |        |      |      |
|------|-------|-----|-----|------|--------|--------|--------|------|------|
| ATOM | 28308 | O   | ILE | 1884 | 86.431 | 80.311 | 63.284 | 0.00 | 0.00 |
| ATOM | 28309 | N   | CYS | 1885 | 85.719 | 81.773 | 64.784 | 0.00 | 0.00 |
| ATOM | 28310 | H   | CYS | 1885 | 85.931 | 82.644 | 65.249 | 0.00 | 0.00 |
| ATOM | 28311 | CA  | CYS | 1885 | 84.607 | 81.018 | 65.219 | 0.00 | 0.00 |
| ATOM | 28312 | HA  | CYS | 1885 | 84.427 | 80.289 | 64.429 | 0.00 | 0.00 |
| ATOM | 28313 | CB  | CYS | 1885 | 85.028 | 80.211 | 66.515 | 0.00 | 0.00 |
| ATOM | 28314 | HB2 | CYS | 1885 | 84.464 | 79.283 | 66.601 | 0.00 | 0.00 |
| ATOM | 28315 | HB3 | CYS | 1885 | 86.088 | 79.961 | 66.573 | 0.00 | 0.00 |
| ATOM | 28316 | SG  | CYS | 1885 | 84.559 | 81.165 | 68.000 | 0.00 | 0.00 |
| ATOM | 28317 | HG  | CYS | 1885 | 85.211 | 82.280 | 67.657 | 0.00 | 0.00 |
| ATOM | 28318 | C   | CYS | 1885 | 83.254 | 81.729 | 65.458 | 0.00 | 0.00 |
| ATOM | 28319 | O   | CYS | 1885 | 83.192 | 82.894 | 65.769 | 0.00 | 0.00 |
| ATOM | 28320 | N   | PRO | 1886 | 82.065 | 81.033 | 65.406 | 0.00 | 0.00 |
| ATOM | 28321 | CD  | PRO | 1886 | 81.868 | 79.724 | 64.870 | 0.00 | 0.00 |
| ATOM | 28322 | HD2 | PRO | 1886 | 82.075 | 79.818 | 63.804 | 0.00 | 0.00 |
| ATOM | 28323 | HD3 | PRO | 1886 | 82.496 | 78.955 | 65.320 | 0.00 | 0.00 |
| ATOM | 28324 | CG  | PRO | 1886 | 80.370 | 79.485 | 64.930 | 0.00 | 0.00 |
| ATOM | 28325 | HG2 | PRO | 1886 | 80.013 | 79.112 | 63.970 | 0.00 | 0.00 |
| ATOM | 28326 | HG3 | PRO | 1886 | 80.183 | 78.810 | 65.765 | 0.00 | 0.00 |
| ATOM | 28327 | CB  | PRO | 1886 | 79.705 | 80.766 | 65.259 | 0.00 | 0.00 |
| ATOM | 28328 | HB2 | PRO | 1886 | 79.421 | 81.167 | 64.286 | 0.00 | 0.00 |
| ATOM | 28329 | HB3 | PRO | 1886 | 78.789 | 80.694 | 65.846 | 0.00 | 0.00 |
| ATOM | 28330 | CA  | PRO | 1886 | 80.782 | 81.578 | 65.944 | 0.00 | 0.00 |
| ATOM | 28331 | HA  | PRO | 1886 | 80.673 | 82.625 | 65.662 | 0.00 | 0.00 |
| ATOM | 28332 | C   | PRO | 1886 | 80.633 | 81.308 | 67.450 | 0.00 | 0.00 |
| ATOM | 28333 | O   | PRO | 1886 | 79.792 | 82.031 | 68.006 | 0.00 | 0.00 |

|      |       |      |     |      |        |        |        |      |      |
|------|-------|------|-----|------|--------|--------|--------|------|------|
| ATOM | 28334 | N    | GLN | 1887 | 81.397 | 80.568 | 68.227 | 0.00 | 0.00 |
| ATOM | 28335 | H    | GLN | 1887 | 82.054 | 79.967 | 67.751 | 0.00 | 0.00 |
| ATOM | 28336 | CA   | GLN | 1887 | 81.209 | 80.418 | 69.740 | 0.00 | 0.00 |
| ATOM | 28337 | HA   | GLN | 1887 | 80.151 | 80.190 | 69.868 | 0.00 | 0.00 |
| ATOM | 28338 | CB   | GLN | 1887 | 82.095 | 79.428 | 70.419 | 0.00 | 0.00 |
| ATOM | 28339 | HB2  | GLN | 1887 | 83.148 | 79.697 | 70.344 | 0.00 | 0.00 |
| ATOM | 28340 | HB3  | GLN | 1887 | 81.913 | 79.592 | 71.481 | 0.00 | 0.00 |
| ATOM | 28341 | CG   | GLN | 1887 | 81.817 | 77.975 | 70.098 | 0.00 | 0.00 |
| ATOM | 28342 | HG2  | GLN | 1887 | 82.358 | 77.292 | 70.753 | 0.00 | 0.00 |
| ATOM | 28343 | HG3  | GLN | 1887 | 80.834 | 77.775 | 70.526 | 0.00 | 0.00 |
| ATOM | 28344 | CD   | GLN | 1887 | 82.153 | 77.525 | 68.692 | 0.00 | 0.00 |
| ATOM | 28345 | OE1  | GLN | 1887 | 83.295 | 77.486 | 68.272 | 0.00 | 0.00 |
| ATOM | 28346 | NE2  | GLN | 1887 | 81.148 | 77.162 | 67.949 | 0.00 | 0.00 |
| ATOM | 28347 | 1HE2 | GLN | 1887 | 81.343 | 76.808 | 67.023 | 0.00 | 0.00 |
| ATOM | 28348 | 2HE2 | GLN | 1887 | 80.199 | 77.248 | 68.283 | 0.00 | 0.00 |
| ATOM | 28349 | C    | GLN | 1887 | 81.302 | 81.788 | 70.463 | 0.00 | 0.00 |
| ATOM | 28350 | O    | GLN | 1887 | 80.645 | 82.012 | 71.429 | 0.00 | 0.00 |
| ATOM | 28351 | N    | GLN | 1888 | 82.238 | 82.680 | 70.094 | 0.00 | 0.00 |
| ATOM | 28352 | H    | GLN | 1888 | 82.812 | 82.358 | 69.328 | 0.00 | 0.00 |
| ATOM | 28353 | CA   | GLN | 1888 | 82.494 | 84.003 | 70.695 | 0.00 | 0.00 |
| ATOM | 28354 | HA   | GLN | 1888 | 82.856 | 83.915 | 71.720 | 0.00 | 0.00 |
| ATOM | 28355 | CB   | GLN | 1888 | 83.626 | 84.765 | 69.940 | 0.00 | 0.00 |
| ATOM | 28356 | HB2  | GLN | 1888 | 83.782 | 85.684 | 70.505 | 0.00 | 0.00 |
| ATOM | 28357 | HB3  | GLN | 1888 | 84.520 | 84.160 | 70.090 | 0.00 | 0.00 |
| ATOM | 28358 | CG   | GLN | 1888 | 83.441 | 85.091 | 68.477 | 0.00 | 0.00 |
| ATOM | 28359 | HG2  | GLN | 1888 | 83.221 | 84.114 | 68.046 | 0.00 | 0.00 |

|      |       |      |     |      |        |        |        |      |      |
|------|-------|------|-----|------|--------|--------|--------|------|------|
| ATOM | 28360 | HG3  | GLN | 1888 | 82.610 | 85.791 | 68.398 | 0.00 | 0.00 |
| ATOM | 28361 | CD   | GLN | 1888 | 84.702 | 85.638 | 67.855 | 0.00 | 0.00 |
| ATOM | 28362 | OE1  | GLN | 1888 | 85.577 | 86.303 | 68.367 | 0.00 | 0.00 |
| ATOM | 28363 | NE2  | GLN | 1888 | 84.849 | 85.272 | 66.612 | 0.00 | 0.00 |
| ATOM | 28364 | 1HE2 | GLN | 1888 | 85.824 | 85.375 | 66.371 | 0.00 | 0.00 |
| ATOM | 28365 | 2HE2 | GLN | 1888 | 84.290 | 84.569 | 66.148 | 0.00 | 0.00 |
| ATOM | 28366 | C    | GLN | 1888 | 81.194 | 84.743 | 70.908 | 0.00 | 0.00 |
| ATOM | 28367 | O    | GLN | 1888 | 81.115 | 85.562 | 71.791 | 0.00 | 0.00 |
| ATOM | 28368 | N    | ALA | 1889 | 80.185 | 84.546 | 70.076 | 0.00 | 0.00 |
| ATOM | 28369 | H    | ALA | 1889 | 80.304 | 83.826 | 69.378 | 0.00 | 0.00 |
| ATOM | 28370 | CA   | ALA | 1889 | 78.984 | 85.363 | 69.992 | 0.00 | 0.00 |
| ATOM | 28371 | HA   | ALA | 1889 | 79.222 | 86.419 | 70.117 | 0.00 | 0.00 |
| ATOM | 28372 | CB   | ALA | 1889 | 78.454 | 85.193 | 68.600 | 0.00 | 0.00 |
| ATOM | 28373 | HB1  | ALA | 1889 | 79.181 | 85.631 | 67.915 | 0.00 | 0.00 |
| ATOM | 28374 | HB2  | ALA | 1889 | 78.013 | 84.201 | 68.501 | 0.00 | 0.00 |
| ATOM | 28375 | HB3  | ALA | 1889 | 77.589 | 85.836 | 68.439 | 0.00 | 0.00 |
| ATOM | 28376 | C    | ALA | 1889 | 77.920 | 85.009 | 71.084 | 0.00 | 0.00 |
| ATOM | 28377 | O    | ALA | 1889 | 76.842 | 85.531 | 71.132 | 0.00 | 0.00 |
| ATOM | 28378 | N    | GLU | 1890 | 78.160 | 83.984 | 71.847 | 0.00 | 0.00 |
| ATOM | 28379 | H    | GLU | 1890 | 79.021 | 83.525 | 71.586 | 0.00 | 0.00 |
| ATOM | 28380 | CA   | GLU | 1890 | 77.176 | 83.261 | 72.759 | 0.00 | 0.00 |
| ATOM | 28381 | HA   | GLU | 1890 | 76.339 | 83.886 | 73.068 | 0.00 | 0.00 |
| ATOM | 28382 | CB   | GLU | 1890 | 76.503 | 82.156 | 71.959 | 0.00 | 0.00 |
| ATOM | 28383 | HB2  | GLU | 1890 | 77.185 | 81.364 | 71.648 | 0.00 | 0.00 |
| ATOM | 28384 | HB3  | GLU | 1890 | 75.835 | 81.643 | 72.651 | 0.00 | 0.00 |
| ATOM | 28385 | CG   | GLU | 1890 | 75.608 | 82.586 | 70.786 | 0.00 | 0.00 |

|      |       |     |     |      |        |        |        |      |      |
|------|-------|-----|-----|------|--------|--------|--------|------|------|
| ATOM | 28386 | HG2 | GLU | 1890 | 75.001 | 83.437 | 71.095 | 0.00 | 0.00 |
| ATOM | 28387 | HG3 | GLU | 1890 | 76.170 | 83.242 | 70.121 | 0.00 | 0.00 |
| ATOM | 28388 | CD  | GLU | 1890 | 74.801 | 81.506 | 70.018 | 0.00 | 0.00 |
| ATOM | 28389 | OE1 | GLU | 1890 | 75.188 | 81.116 | 68.877 | 0.00 | 0.00 |
| ATOM | 28390 | OE2 | GLU | 1890 | 73.783 | 81.117 | 70.558 | 0.00 | 0.00 |
| ATOM | 28391 | C   | GLU | 1890 | 77.841 | 82.675 | 74.044 | 0.00 | 0.00 |
| ATOM | 28392 | O   | GLU | 1890 | 77.217 | 82.819 | 75.097 | 0.00 | 0.00 |
| ATOM | 28393 | N   | GLU | 1891 | 79.115 | 82.158 | 73.919 | 0.00 | 0.00 |
| ATOM | 28394 | H   | GLU | 1891 | 79.488 | 82.021 | 72.991 | 0.00 | 0.00 |
| ATOM | 28395 | CA  | GLU | 1891 | 79.860 | 81.683 | 75.081 | 0.00 | 0.00 |
| ATOM | 28396 | HA  | GLU | 1891 | 79.233 | 81.193 | 75.826 | 0.00 | 0.00 |
| ATOM | 28397 | CB  | GLU | 1891 | 80.937 | 80.637 | 74.733 | 0.00 | 0.00 |
| ATOM | 28398 | HB2 | GLU | 1891 | 81.393 | 80.130 | 75.584 | 0.00 | 0.00 |
| ATOM | 28399 | HB3 | GLU | 1891 | 81.674 | 81.160 | 74.124 | 0.00 | 0.00 |
| ATOM | 28400 | CG  | GLU | 1891 | 80.364 | 79.498 | 73.869 | 0.00 | 0.00 |
| ATOM | 28401 | HG2 | GLU | 1891 | 79.815 | 79.982 | 73.061 | 0.00 | 0.00 |
| ATOM | 28402 | HG3 | GLU | 1891 | 81.219 | 78.941 | 73.487 | 0.00 | 0.00 |
| ATOM | 28403 | CD  | GLU | 1891 | 79.453 | 78.533 | 74.612 | 0.00 | 0.00 |
| ATOM | 28404 | OE1 | GLU | 1891 | 78.359 | 78.854 | 75.194 | 0.00 | 0.00 |
| ATOM | 28405 | OE2 | GLU | 1891 | 79.948 | 77.378 | 74.568 | 0.00 | 0.00 |
| ATOM | 28406 | C   | GLU | 1891 | 80.716 | 82.792 | 75.847 | 0.00 | 0.00 |
| ATOM | 28407 | O   | GLU | 1891 | 80.888 | 82.565 | 77.035 | 0.00 | 0.00 |
| ATOM | 28408 | N   | ALA | 1892 | 81.162 | 83.869 | 75.222 | 0.00 | 0.00 |
| ATOM | 28409 | H   | ALA | 1892 | 80.915 | 84.020 | 74.255 | 0.00 | 0.00 |
| ATOM | 28410 | CA  | ALA | 1892 | 81.913 | 85.031 | 75.749 | 0.00 | 0.00 |
| ATOM | 28411 | HA  | ALA | 1892 | 82.158 | 84.731 | 76.768 | 0.00 | 0.00 |



|            |      |     |      |        |        |        |      |      |
|------------|------|-----|------|--------|--------|--------|------|------|
| ATOM 28412 | CB   | ALA | 1892 | 83.197 | 85.172 | 74.967 | 0.00 | 0.00 |
| ATOM 28413 | HB1  | ALA | 1892 | 83.007 | 85.763 | 74.071 | 0.00 | 0.00 |
| ATOM 28414 | HB2  | ALA | 1892 | 83.936 | 85.743 | 75.530 | 0.00 | 0.00 |
| ATOM 28415 | HB3  | ALA | 1892 | 83.596 | 84.175 | 74.778 | 0.00 | 0.00 |
| ATOM 28416 | C    | ALA | 1892 | 81.031 | 86.283 | 75.728 | 0.00 | 0.00 |
| ATOM 28417 | O    | ALA | 1892 | 81.591 | 87.261 | 76.253 | 0.00 | 0.00 |
| ATOM 28418 | N    | LEU | 1893 | 79.733 | 86.261 | 75.430 | 0.00 | 0.00 |
| ATOM 28419 | H    | LEU | 1893 | 79.307 | 85.431 | 75.042 | 0.00 | 0.00 |
| ATOM 28420 | CA   | LEU | 1893 | 78.783 | 87.382 | 75.625 | 0.00 | 0.00 |
| ATOM 28421 | HA   | LEU | 1893 | 79.060 | 88.305 | 75.116 | 0.00 | 0.00 |
| ATOM 28422 | CB   | LEU | 1893 | 77.404 | 86.802 | 75.100 | 0.00 | 0.00 |
| ATOM 28423 | HB2  | LEU | 1893 | 77.555 | 85.874 | 74.549 | 0.00 | 0.00 |
| ATOM 28424 | HB3  | LEU | 1893 | 76.809 | 86.455 | 75.944 | 0.00 | 0.00 |
| ATOM 28425 | CG   | LEU | 1893 | 76.689 | 87.815 | 74.243 | 0.00 | 0.00 |
| ATOM 28426 | HG   | LEU | 1893 | 77.227 | 88.040 | 73.322 | 0.00 | 0.00 |
| ATOM 28427 | CD1  | LEU | 1893 | 75.278 | 87.241 | 73.821 | 0.00 | 0.00 |
| ATOM 28428 | 1HD1 | LEU | 1893 | 74.928 | 87.807 | 72.957 | 0.00 | 0.00 |
| ATOM 28429 | 2HD1 | LEU | 1893 | 75.272 | 86.186 | 73.550 | 0.00 | 0.00 |
| ATOM 28430 | 3HD1 | LEU | 1893 | 74.540 | 87.380 | 74.612 | 0.00 | 0.00 |
| ATOM 28431 | CD2  | LEU | 1893 | 76.319 | 89.167 | 74.915 | 0.00 | 0.00 |
| ATOM 28432 | 1HD2 | LEU | 1893 | 75.738 | 88.943 | 75.810 | 0.00 | 0.00 |
| ATOM 28433 | 2HD2 | LEU | 1893 | 77.239 | 89.690 | 75.174 | 0.00 | 0.00 |
| ATOM 28434 | 3HD2 | LEU | 1893 | 75.731 | 89.853 | 74.305 | 0.00 | 0.00 |
| ATOM 28435 | C    | LEU | 1893 | 78.631 | 87.815 | 77.078 | 0.00 | 0.00 |
| ATOM 28436 | O    | LEU | 1893 | 78.487 | 89.040 | 77.456 | 0.00 | 0.00 |
| ATOM 28437 | N    | VAL | 1894 | 78.795 | 86.790 | 77.957 | 0.00 | 0.00 |

|      |       |      |     |      |        |        |        |      |      |
|------|-------|------|-----|------|--------|--------|--------|------|------|
| ATOM | 28438 | H    | VAL | 1894 | 78.822 | 85.901 | 77.478 | 0.00 | 0.00 |
| ATOM | 28439 | CA   | VAL | 1894 | 79.008 | 86.973 | 79.411 | 0.00 | 0.00 |
| ATOM | 28440 | HA   | VAL | 1894 | 78.068 | 87.357 | 79.807 | 0.00 | 0.00 |
| ATOM | 28441 | CB   | VAL | 1894 | 79.260 | 85.556 | 80.106 | 0.00 | 0.00 |
| ATOM | 28442 | HB   | VAL | 1894 | 79.133 | 85.704 | 81.178 | 0.00 | 0.00 |
| ATOM | 28443 | CG1  | VAL | 1894 | 78.169 | 84.483 | 79.724 | 0.00 | 0.00 |
| ATOM | 28444 | 1HG1 | VAL | 1894 | 78.069 | 84.305 | 78.653 | 0.00 | 0.00 |
| ATOM | 28445 | 2HG1 | VAL | 1894 | 78.415 | 83.492 | 80.106 | 0.00 | 0.00 |
| ATOM | 28446 | 3HG1 | VAL | 1894 | 77.269 | 84.807 | 80.247 | 0.00 | 0.00 |
| ATOM | 28447 | CG2  | VAL | 1894 | 80.571 | 84.993 | 79.840 | 0.00 | 0.00 |
| ATOM | 28448 | 1HG2 | VAL | 1894 | 80.627 | 84.022 | 80.332 | 0.00 | 0.00 |
| ATOM | 28449 | 2HG2 | VAL | 1894 | 80.763 | 84.916 | 78.770 | 0.00 | 0.00 |
| ATOM | 28450 | 3HG2 | VAL | 1894 | 81.372 | 85.618 | 80.233 | 0.00 | 0.00 |
| ATOM | 28451 | C    | VAL | 1894 | 80.066 | 87.937 | 79.876 | 0.00 | 0.00 |
| ATOM | 28452 | O    | VAL | 1894 | 80.017 | 88.237 | 81.070 | 0.00 | 0.00 |
| ATOM | 28453 | N    | SER | 1895 | 81.046 | 88.412 | 79.032 | 0.00 | 0.00 |
| ATOM | 28454 | H    | SER | 1895 | 81.046 | 88.023 | 78.100 | 0.00 | 0.00 |
| ATOM | 28455 | CA   | SER | 1895 | 81.921 | 89.530 | 79.308 | 0.00 | 0.00 |
| ATOM | 28456 | HA   | SER | 1895 | 82.720 | 89.316 | 80.017 | 0.00 | 0.00 |
| ATOM | 28457 | CB   | SER | 1895 | 82.732 | 89.754 | 78.049 | 0.00 | 0.00 |
| ATOM | 28458 | HB2  | SER | 1895 | 83.411 | 90.586 | 78.233 | 0.00 | 0.00 |
| ATOM | 28459 | HB3  | SER | 1895 | 83.347 | 88.869 | 77.887 | 0.00 | 0.00 |
| ATOM | 28460 | OG   | SER | 1895 | 82.119 | 89.888 | 76.775 | 0.00 | 0.00 |
| ATOM | 28461 | HG   | SER | 1895 | 81.901 | 88.993 | 76.505 | 0.00 | 0.00 |
| ATOM | 28462 | C    | SER | 1895 | 81.242 | 90.798 | 79.605 | 0.00 | 0.00 |
| ATOM | 28463 | O    | SER | 1895 | 81.684 | 91.555 | 80.467 | 0.00 | 0.00 |

|      |       |      |     |      |        |        |        |      |      |
|------|-------|------|-----|------|--------|--------|--------|------|------|
| ATOM | 28464 | N    | GLY | 1896 | 80.087 | 91.006 | 78.988 | 0.00 | 0.00 |
| ATOM | 28465 | H    | GLY | 1896 | 79.765 | 90.203 | 78.468 | 0.00 | 0.00 |
| ATOM | 28466 | CA   | GLY | 1896 | 79.344 | 92.310 | 78.932 | 0.00 | 0.00 |
| ATOM | 28467 | HA2  | GLY | 1896 | 78.296 | 92.045 | 79.070 | 0.00 | 0.00 |
| ATOM | 28468 | HA3  | GLY | 1896 | 79.749 | 93.005 | 79.668 | 0.00 | 0.00 |
| ATOM | 28469 | C    | GLY | 1896 | 79.483 | 93.027 | 77.610 | 0.00 | 0.00 |
| ATOM | 28470 | O    | GLY | 1896 | 79.169 | 94.272 | 77.465 | 0.00 | 0.00 |
| ATOM | 28471 | N    | VAL | 1897 | 80.119 | 92.381 | 76.612 | 0.00 | 0.00 |
| ATOM | 28472 | H    | VAL | 1897 | 80.396 | 91.414 | 76.709 | 0.00 | 0.00 |
| ATOM | 28473 | CA   | VAL | 1897 | 80.340 | 92.866 | 75.195 | 0.00 | 0.00 |
| ATOM | 28474 | HA   | VAL | 1897 | 80.360 | 93.955 | 75.230 | 0.00 | 0.00 |
| ATOM | 28475 | CB   | VAL | 1897 | 81.720 | 92.546 | 74.622 | 0.00 | 0.00 |
| ATOM | 28476 | HB   | VAL | 1897 | 81.844 | 91.477 | 74.445 | 0.00 | 0.00 |
| ATOM | 28477 | CG1  | VAL | 1897 | 82.008 | 93.311 | 73.297 | 0.00 | 0.00 |
| ATOM | 28478 | 1HG1 | VAL | 1897 | 81.986 | 94.397 | 73.383 | 0.00 | 0.00 |
| ATOM | 28479 | 2HG1 | VAL | 1897 | 83.025 | 93.024 | 73.026 | 0.00 | 0.00 |
| ATOM | 28480 | 3HG1 | VAL | 1897 | 81.319 | 93.058 | 72.491 | 0.00 | 0.00 |
| ATOM | 28481 | CG2  | VAL | 1897 | 82.853 | 92.921 | 75.600 | 0.00 | 0.00 |
| ATOM | 28482 | 1HG2 | VAL | 1897 | 82.783 | 92.177 | 76.393 | 0.00 | 0.00 |
| ATOM | 28483 | 2HG2 | VAL | 1897 | 83.862 | 92.935 | 75.188 | 0.00 | 0.00 |
| ATOM | 28484 | 3HG2 | VAL | 1897 | 82.792 | 93.908 | 76.059 | 0.00 | 0.00 |
| ATOM | 28485 | C    | VAL | 1897 | 79.162 | 92.441 | 74.279 | 0.00 | 0.00 |
| ATOM | 28486 | O    | VAL | 1897 | 78.990 | 91.335 | 73.831 | 0.00 | 0.00 |
| ATOM | 28487 | N    | THR | 1898 | 78.211 | 93.363 | 74.068 | 0.00 | 0.00 |
| ATOM | 28488 | H    | THR | 1898 | 78.379 | 94.256 | 74.509 | 0.00 | 0.00 |
| ATOM | 28489 | CA   | THR | 1898 | 76.891 | 93.044 | 73.396 | 0.00 | 0.00 |

|      |       |      |     |      |        |        |        |      |      |
|------|-------|------|-----|------|--------|--------|--------|------|------|
| ATOM | 28490 | HA   | THR | 1898 | 76.940 | 91.957 | 73.463 | 0.00 | 0.00 |
| ATOM | 28491 | CB   | THR | 1898 | 75.589 | 93.454 | 73.997 | 0.00 | 0.00 |
| ATOM | 28492 | HB   | THR | 1898 | 74.760 | 93.039 | 73.425 | 0.00 | 0.00 |
| ATOM | 28493 | CG2  | THR | 1898 | 75.449 | 92.953 | 75.388 | 0.00 | 0.00 |
| ATOM | 28494 | 1HG2 | THR | 1898 | 76.195 | 93.303 | 76.102 | 0.00 | 0.00 |
| ATOM | 28495 | 2HG2 | THR | 1898 | 74.473 | 93.275 | 75.749 | 0.00 | 0.00 |
| ATOM | 28496 | 3HG2 | THR | 1898 | 75.261 | 91.892 | 75.552 | 0.00 | 0.00 |
| ATOM | 28497 | OG1  | THR | 1898 | 75.444 | 94.905 | 73.933 | 0.00 | 0.00 |
| ATOM | 28498 | HG1  | THR | 1898 | 74.730 | 94.982 | 73.296 | 0.00 | 0.00 |
| ATOM | 28499 | C    | THR | 1898 | 76.940 | 93.368 | 71.859 | 0.00 | 0.00 |
| ATOM | 28500 | O    | THR | 1898 | 75.996 | 93.043 | 71.144 | 0.00 | 0.00 |
| ATOM | 28501 | N    | THR | 1899 | 77.933 | 94.072 | 71.418 | 0.00 | 0.00 |
| ATOM | 28502 | H    | THR | 1899 | 78.486 | 94.433 | 72.183 | 0.00 | 0.00 |
| ATOM | 28503 | CA   | THR | 1899 | 78.188 | 94.391 | 70.037 | 0.00 | 0.00 |
| ATOM | 28504 | HA   | THR | 1899 | 77.472 | 93.971 | 69.331 | 0.00 | 0.00 |
| ATOM | 28505 | CB   | THR | 1899 | 77.964 | 95.867 | 69.919 | 0.00 | 0.00 |
| ATOM | 28506 | HB   | THR | 1899 | 78.672 | 96.438 | 70.521 | 0.00 | 0.00 |
| ATOM | 28507 | CG2  | THR | 1899 | 78.192 | 96.431 | 68.536 | 0.00 | 0.00 |
| ATOM | 28508 | 1HG2 | THR | 1899 | 79.218 | 96.414 | 68.167 | 0.00 | 0.00 |
| ATOM | 28509 | 2HG2 | THR | 1899 | 77.598 | 95.862 | 67.821 | 0.00 | 0.00 |
| ATOM | 28510 | 3HG2 | THR | 1899 | 77.890 | 97.478 | 68.490 | 0.00 | 0.00 |
| ATOM | 28511 | OG1  | THR | 1899 | 76.750 | 96.230 | 70.486 | 0.00 | 0.00 |
| ATOM | 28512 | HG1  | THR | 1899 | 76.837 | 96.146 | 71.438 | 0.00 | 0.00 |
| ATOM | 28513 | C    | THR | 1899 | 79.524 | 93.943 | 69.544 | 0.00 | 0.00 |
| ATOM | 28514 | O    | THR | 1899 | 80.478 | 94.015 | 70.364 | 0.00 | 0.00 |
| ATOM | 28515 | N    | MET | 1900 | 79.613 | 93.559 | 68.255 | 0.00 | 0.00 |

|            |      |     |      |        |        |        |      |      |
|------------|------|-----|------|--------|--------|--------|------|------|
| ATOM 28516 | H    | MET | 1900 | 78.753 | 93.451 | 67.736 | 0.00 | 0.00 |
| ATOM 28517 | CA   | MET | 1900 | 80.873 | 93.131 | 67.654 | 0.00 | 0.00 |
| ATOM 28518 | HA   | MET | 1900 | 81.744 | 93.356 | 68.269 | 0.00 | 0.00 |
| ATOM 28519 | CB   | MET | 1900 | 80.741 | 91.570 | 67.734 | 0.00 | 0.00 |
| ATOM 28520 | HB2  | MET | 1900 | 79.838 | 91.126 | 67.315 | 0.00 | 0.00 |
| ATOM 28521 | HB3  | MET | 1900 | 81.605 | 91.124 | 67.241 | 0.00 | 0.00 |
| ATOM 28522 | CG   | MET | 1900 | 80.903 | 91.070 | 69.115 | 0.00 | 0.00 |
| ATOM 28523 | HG2  | MET | 1900 | 81.865 | 91.433 | 69.479 | 0.00 | 0.00 |
| ATOM 28524 | HG3  | MET | 1900 | 80.114 | 91.443 | 69.767 | 0.00 | 0.00 |
| ATOM 28525 | SD   | MET | 1900 | 80.911 | 89.219 | 69.337 | 0.00 | 0.00 |
| ATOM 28526 | CE   | MET | 1900 | 81.181 | 89.086 | 71.132 | 0.00 | 0.00 |
| ATOM 28527 | HE1  | MET | 1900 | 81.606 | 88.103 | 71.333 | 0.00 | 0.00 |
| ATOM 28528 | HE2  | MET | 1900 | 81.847 | 89.839 | 71.552 | 0.00 | 0.00 |
| ATOM 28529 | HE3  | MET | 1900 | 80.209 | 89.081 | 71.624 | 0.00 | 0.00 |
| ATOM 28530 | C    | MET | 1900 | 81.150 | 93.630 | 66.200 | 0.00 | 0.00 |
| ATOM 28531 | O    | MET | 1900 | 80.556 | 93.171 | 65.263 | 0.00 | 0.00 |
| ATOM 28532 | N    | VAL | 1901 | 81.984 | 94.692 | 66.027 | 0.00 | 0.00 |
| ATOM 28533 | H    | VAL | 1901 | 82.406 | 95.156 | 66.819 | 0.00 | 0.00 |
| ATOM 28534 | CA   | VAL | 1901 | 82.626 | 95.076 | 64.759 | 0.00 | 0.00 |
| ATOM 28535 | HA   | VAL | 1901 | 81.782 | 95.064 | 64.070 | 0.00 | 0.00 |
| ATOM 28536 | CB   | VAL | 1901 | 83.235 | 96.484 | 64.711 | 0.00 | 0.00 |
| ATOM 28537 | HB   | VAL | 1901 | 84.158 | 96.584 | 65.282 | 0.00 | 0.00 |
| ATOM 28538 | CG1  | VAL | 1901 | 83.638 | 96.701 | 63.252 | 0.00 | 0.00 |
| ATOM 28539 | 1HG1 | VAL | 1901 | 82.879 | 96.643 | 62.472 | 0.00 | 0.00 |
| ATOM 28540 | 2HG1 | VAL | 1901 | 84.053 | 97.707 | 63.194 | 0.00 | 0.00 |
| ATOM 28541 | 3HG1 | VAL | 1901 | 84.422 | 95.973 | 63.045 | 0.00 | 0.00 |

|      |       |      |     |      |        |        |        |      |      |
|------|-------|------|-----|------|--------|--------|--------|------|------|
| ATOM | 28542 | CG2  | VAL | 1901 | 82.181 | 97.531 | 65.177 | 0.00 | 0.00 |
| ATOM | 28543 | 1HG2 | VAL | 1901 | 81.856 | 97.449 | 66.215 | 0.00 | 0.00 |
| ATOM | 28544 | 2HG2 | VAL | 1901 | 82.628 | 98.516 | 65.045 | 0.00 | 0.00 |
| ATOM | 28545 | 3HG2 | VAL | 1901 | 81.348 | 97.499 | 64.475 | 0.00 | 0.00 |
| ATOM | 28546 | C    | VAL | 1901 | 83.748 | 93.962 | 64.447 | 0.00 | 0.00 |
| ATOM | 28547 | O    | VAL | 1901 | 84.587 | 93.692 | 65.285 | 0.00 | 0.00 |
| ATOM | 28548 | N    | GLY | 1902 | 83.584 | 93.207 | 63.328 | 0.00 | 0.00 |
| ATOM | 28549 | H    | GLY | 1902 | 82.776 | 93.479 | 62.786 | 0.00 | 0.00 |
| ATOM | 28550 | CA   | GLY | 1902 | 84.520 | 92.187 | 63.049 | 0.00 | 0.00 |
| ATOM | 28551 | HA2  | GLY | 1902 | 85.505 | 92.372 | 63.478 | 0.00 | 0.00 |
| ATOM | 28552 | HA3  | GLY | 1902 | 84.251 | 91.238 | 63.512 | 0.00 | 0.00 |
| ATOM | 28553 | C    | GLY | 1902 | 84.851 | 91.945 | 61.532 | 0.00 | 0.00 |
| ATOM | 28554 | O    | GLY | 1902 | 84.212 | 92.526 | 60.686 | 0.00 | 0.00 |
| ATOM | 28555 | N    | GLY | 1903 | 85.698 | 90.956 | 61.289 | 0.00 | 0.00 |
| ATOM | 28556 | H    | GLY | 1903 | 85.959 | 90.533 | 62.168 | 0.00 | 0.00 |
| ATOM | 28557 | CA   | GLY | 1903 | 86.101 | 90.384 | 59.997 | 0.00 | 0.00 |
| ATOM | 28558 | HA2  | GLY | 1903 | 86.585 | 91.134 | 59.372 | 0.00 | 0.00 |
| ATOM | 28559 | HA3  | GLY | 1903 | 85.117 | 90.365 | 59.528 | 0.00 | 0.00 |
| ATOM | 28560 | C    | GLY | 1903 | 86.643 | 88.998 | 60.061 | 0.00 | 0.00 |
| ATOM | 28561 | O    | GLY | 1903 | 87.402 | 88.659 | 61.004 | 0.00 | 0.00 |
| ATOM | 28562 | N    | GLY | 1904 | 86.354 | 88.189 | 59.014 | 0.00 | 0.00 |
| ATOM | 28563 | H    | GLY | 1904 | 85.937 | 88.535 | 58.162 | 0.00 | 0.00 |
| ATOM | 28564 | CA   | GLY | 1904 | 86.850 | 86.794 | 58.848 | 0.00 | 0.00 |
| ATOM | 28565 | HA2  | GLY | 1904 | 87.716 | 86.894 | 58.193 | 0.00 | 0.00 |
| ATOM | 28566 | HA3  | GLY | 1904 | 86.957 | 86.293 | 59.810 | 0.00 | 0.00 |
| ATOM | 28567 | C    | GLY | 1904 | 85.799 | 85.988 | 58.037 | 0.00 | 0.00 |

|      |       |      |     |      |        |        |        |      |      |
|------|-------|------|-----|------|--------|--------|--------|------|------|
| ATOM | 28568 | O    | GLY | 1904 | 84.727 | 86.502 | 57.626 | 0.00 | 0.00 |
| ATOM | 28569 | N    | THR | 1905 | 85.879 | 84.697 | 58.107 | 0.00 | 0.00 |
| ATOM | 28570 | H    | THR | 1905 | 86.794 | 84.367 | 58.379 | 0.00 | 0.00 |
| ATOM | 28571 | CA   | THR | 1905 | 85.057 | 83.786 | 57.245 | 0.00 | 0.00 |
| ATOM | 28572 | HA   | THR | 1905 | 84.062 | 84.171 | 57.024 | 0.00 | 0.00 |
| ATOM | 28573 | CB   | THR | 1905 | 85.763 | 83.592 | 55.878 | 0.00 | 0.00 |
| ATOM | 28574 | HB   | THR | 1905 | 85.084 | 82.936 | 55.333 | 0.00 | 0.00 |
| ATOM | 28575 | CG2  | THR | 1905 | 86.105 | 84.831 | 55.099 | 0.00 | 0.00 |
| ATOM | 28576 | 1HG2 | THR | 1905 | 86.894 | 85.440 | 55.541 | 0.00 | 0.00 |
| ATOM | 28577 | 2HG2 | THR | 1905 | 86.389 | 84.518 | 54.094 | 0.00 | 0.00 |
| ATOM | 28578 | 3HG2 | THR | 1905 | 85.188 | 85.403 | 54.957 | 0.00 | 0.00 |
| ATOM | 28579 | OG1  | THR | 1905 | 86.934 | 82.900 | 56.077 | 0.00 | 0.00 |
| ATOM | 28580 | HG1  | THR | 1905 | 87.548 | 83.554 | 56.418 | 0.00 | 0.00 |
| ATOM | 28581 | C    | THR | 1905 | 84.836 | 82.399 | 57.852 | 0.00 | 0.00 |
| ATOM | 28582 | O    | THR | 1905 | 83.917 | 81.694 | 57.469 | 0.00 | 0.00 |
| ATOM | 28583 | N    | GLY | 1906 | 85.654 | 81.955 | 58.845 | 0.00 | 0.00 |
| ATOM | 28584 | H    | GLY | 1906 | 86.230 | 82.649 | 59.298 | 0.00 | 0.00 |
| ATOM | 28585 | CA   | GLY | 1906 | 85.887 | 80.550 | 59.307 | 0.00 | 0.00 |
| ATOM | 28586 | HA2  | GLY | 1906 | 85.188 | 80.393 | 60.129 | 0.00 | 0.00 |
| ATOM | 28587 | HA3  | GLY | 1906 | 85.613 | 79.963 | 58.430 | 0.00 | 0.00 |
| ATOM | 28588 | C    | GLY | 1906 | 87.314 | 80.218 | 59.730 | 0.00 | 0.00 |
| ATOM | 28589 | O    | GLY | 1906 | 88.076 | 81.109 | 59.715 | 0.00 | 0.00 |
| ATOM | 28590 | N    | PRO | 1907 | 87.663 | 78.990 | 60.217 | 0.00 | 0.00 |
| ATOM | 28591 | CD   | PRO | 1907 | 86.760 | 77.974 | 60.722 | 0.00 | 0.00 |
| ATOM | 28592 | HD2  | PRO | 1907 | 86.073 | 78.606 | 61.285 | 0.00 | 0.00 |
| ATOM | 28593 | HD3  | PRO | 1907 | 86.334 | 77.380 | 59.913 | 0.00 | 0.00 |

|            |     |     |      |        |        |        |      |      |
|------------|-----|-----|------|--------|--------|--------|------|------|
| ATOM 28594 | CG  | PRO | 1907 | 87.618 | 77.110 | 61.664 | 0.00 | 0.00 |
| ATOM 28595 | HG2 | PRO | 1907 | 87.783 | 77.602 | 62.622 | 0.00 | 0.00 |
| ATOM 28596 | HG3 | PRO | 1907 | 87.281 | 76.101 | 61.903 | 0.00 | 0.00 |
| ATOM 28597 | CB  | PRO | 1907 | 88.955 | 77.121 | 60.957 | 0.00 | 0.00 |
| ATOM 28598 | HB2 | PRO | 1907 | 89.690 | 76.838 | 61.711 | 0.00 | 0.00 |
| ATOM 28599 | HB3 | PRO | 1907 | 88.973 | 76.461 | 60.090 | 0.00 | 0.00 |
| ATOM 28600 | CA  | PRO | 1907 | 89.072 | 78.590 | 60.466 | 0.00 | 0.00 |
| ATOM 28601 | HA  | PRO | 1907 | 89.508 | 79.203 | 61.255 | 0.00 | 0.00 |
| ATOM 28602 | C   | PRO | 1907 | 90.040 | 78.658 | 59.242 | 0.00 | 0.00 |
| ATOM 28603 | O   | PRO | 1907 | 90.740 | 77.700 | 58.841 | 0.00 | 0.00 |
| ATOM 28604 | N   | ALA | 1908 | 90.053 | 79.803 | 58.556 | 0.00 | 0.00 |
| ATOM 28605 | H   | ALA | 1908 | 89.506 | 80.588 | 58.878 | 0.00 | 0.00 |
| ATOM 28606 | CA  | ALA | 1908 | 90.889 | 80.119 | 57.377 | 0.00 | 0.00 |
| ATOM 28607 | HA  | ALA | 1908 | 91.114 | 79.160 | 56.911 | 0.00 | 0.00 |
| ATOM 28608 | CB  | ALA | 1908 | 89.883 | 80.857 | 56.378 | 0.00 | 0.00 |
| ATOM 28609 | HB1 | ALA | 1908 | 90.339 | 81.165 | 55.438 | 0.00 | 0.00 |
| ATOM 28610 | HB2 | ALA | 1908 | 89.046 | 80.208 | 56.123 | 0.00 | 0.00 |
| ATOM 28611 | HB3 | ALA | 1908 | 89.549 | 81.771 | 56.869 | 0.00 | 0.00 |
| ATOM 28612 | C   | ALA | 1908 | 92.149 | 80.952 | 57.736 | 0.00 | 0.00 |
| ATOM 28613 | O   | ALA | 1908 | 92.146 | 81.639 | 58.750 | 0.00 | 0.00 |
| ATOM 28614 | N   | ALA | 1909 | 93.023 | 81.025 | 56.789 | 0.00 | 0.00 |
| ATOM 28615 | H   | ALA | 1909 | 92.917 | 80.539 | 55.910 | 0.00 | 0.00 |
| ATOM 28616 | CA  | ALA | 1909 | 94.275 | 81.747 | 56.940 | 0.00 | 0.00 |
| ATOM 28617 | HA  | ALA | 1909 | 94.722 | 81.500 | 57.903 | 0.00 | 0.00 |
| ATOM 28618 | CB  | ALA | 1909 | 95.298 | 81.293 | 55.898 | 0.00 | 0.00 |
| ATOM 28619 | HB1 | ALA | 1909 | 95.017 | 81.667 | 54.914 | 0.00 | 0.00 |



|      |       |      |     |      |        |        |        |      |      |
|------|-------|------|-----|------|--------|--------|--------|------|------|
| ATOM | 28620 | HB2  | ALA | 1909 | 96.287 | 81.720 | 56.062 | 0.00 | 0.00 |
| ATOM | 28621 | HB3  | ALA | 1909 | 95.450 | 80.228 | 56.075 | 0.00 | 0.00 |
| ATOM | 28622 | C    | ALA | 1909 | 94.193 | 83.245 | 56.914 | 0.00 | 0.00 |
| ATOM | 28623 | O    | ALA | 1909 | 94.892 | 83.845 | 57.752 | 0.00 | 0.00 |
| ATOM | 28624 | N    | GLY | 1910 | 93.490 | 83.865 | 55.957 | 0.00 | 0.00 |
| ATOM | 28625 | H    | GLY | 1910 | 92.921 | 83.403 | 55.262 | 0.00 | 0.00 |
| ATOM | 28626 | CA   | GLY | 1910 | 93.291 | 85.294 | 56.061 | 0.00 | 0.00 |
| ATOM | 28627 | HA2  | GLY | 1910 | 94.284 | 85.652 | 56.332 | 0.00 | 0.00 |
| ATOM | 28628 | HA3  | GLY | 1910 | 92.818 | 85.757 | 55.195 | 0.00 | 0.00 |
| ATOM | 28629 | C    | GLY | 1910 | 92.525 | 85.737 | 57.197 | 0.00 | 0.00 |
| ATOM | 28630 | O    | GLY | 1910 | 92.738 | 86.742 | 57.848 | 0.00 | 0.00 |
| ATOM | 28631 | N    | THR | 1911 | 91.580 | 84.871 | 57.659 | 0.00 | 0.00 |
| ATOM | 28632 | H    | THR | 1911 | 91.145 | 84.366 | 56.900 | 0.00 | 0.00 |
| ATOM | 28633 | CA   | THR | 1911 | 90.796 | 85.156 | 58.834 | 0.00 | 0.00 |
| ATOM | 28634 | HA   | THR | 1911 | 90.404 | 86.169 | 58.750 | 0.00 | 0.00 |
| ATOM | 28635 | CB   | THR | 1911 | 89.597 | 84.105 | 58.797 | 0.00 | 0.00 |
| ATOM | 28636 | HB   | THR | 1911 | 90.063 | 83.130 | 58.654 | 0.00 | 0.00 |
| ATOM | 28637 | CG2  | THR | 1911 | 88.737 | 84.204 | 59.968 | 0.00 | 0.00 |
| ATOM | 28638 | 1HG2 | THR | 1911 | 88.635 | 85.241 | 60.286 | 0.00 | 0.00 |
| ATOM | 28639 | 2HG2 | THR | 1911 | 87.807 | 83.685 | 59.736 | 0.00 | 0.00 |
| ATOM | 28640 | 3HG2 | THR | 1911 | 89.184 | 83.637 | 60.784 | 0.00 | 0.00 |
| ATOM | 28641 | OG1  | THR | 1911 | 88.693 | 84.419 | 57.771 | 0.00 | 0.00 |
| ATOM | 28642 | HG1  | THR | 1911 | 89.211 | 84.434 | 56.964 | 0.00 | 0.00 |
| ATOM | 28643 | C    | THR | 1911 | 91.629 | 85.091 | 60.204 | 0.00 | 0.00 |
| ATOM | 28644 | O    | THR | 1911 | 91.274 | 85.774 | 61.146 | 0.00 | 0.00 |
| ATOM | 28645 | N    | HIE | 1912 | 92.638 | 84.166 | 60.260 | 0.00 | 0.00 |

|      |       |     |     |      |        |        |        |      |      |
|------|-------|-----|-----|------|--------|--------|--------|------|------|
| ATOM | 28646 | H   | HIE | 1912 | 92.821 | 83.647 | 59.413 | 0.00 | 0.00 |
| ATOM | 28647 | CA  | HIE | 1912 | 93.477 | 83.999 | 61.397 | 0.00 | 0.00 |
| ATOM | 28648 | HA  | HIE | 1912 | 92.812 | 84.096 | 62.255 | 0.00 | 0.00 |
| ATOM | 28649 | CB  | HIE | 1912 | 94.201 | 82.658 | 61.277 | 0.00 | 0.00 |
| ATOM | 28650 | HB2 | HIE | 1912 | 93.474 | 81.889 | 61.539 | 0.00 | 0.00 |
| ATOM | 28651 | HB3 | HIE | 1912 | 94.507 | 82.347 | 60.278 | 0.00 | 0.00 |
| ATOM | 28652 | CG  | HIE | 1912 | 95.336 | 82.472 | 62.212 | 0.00 | 0.00 |
| ATOM | 28653 | ND1 | HIE | 1912 | 96.445 | 81.676 | 61.961 | 0.00 | 0.00 |
| ATOM | 28654 | CE1 | HIE | 1912 | 97.162 | 81.698 | 63.107 | 0.00 | 0.00 |
| ATOM | 28655 | HE1 | HIE | 1912 | 98.029 | 81.092 | 63.324 | 0.00 | 0.00 |
| ATOM | 28656 | NE2 | HIE | 1912 | 96.448 | 82.394 | 64.082 | 0.00 | 0.00 |
| ATOM | 28657 | HE2 | HIE | 1912 | 96.600 | 82.381 | 65.080 | 0.00 | 0.00 |
| ATOM | 28658 | CD2 | HIE | 1912 | 95.281 | 82.814 | 63.504 | 0.00 | 0.00 |
| ATOM | 28659 | HD2 | HIE | 1912 | 94.607 | 83.505 | 63.990 | 0.00 | 0.00 |
| ATOM | 28660 | C   | HIE | 1912 | 94.489 | 85.168 | 61.450 | 0.00 | 0.00 |
| ATOM | 28661 | O   | HIE | 1912 | 94.934 | 85.557 | 62.519 | 0.00 | 0.00 |
| ATOM | 28662 | N   | ALA | 1913 | 95.004 | 85.574 | 60.335 | 0.00 | 0.00 |
| ATOM | 28663 | H   | ALA | 1913 | 94.659 | 85.147 | 59.487 | 0.00 | 0.00 |
| ATOM | 28664 | CA  | ALA | 1913 | 95.969 | 86.658 | 60.184 | 0.00 | 0.00 |
| ATOM | 28665 | HA  | ALA | 1913 | 96.762 | 86.629 | 60.931 | 0.00 | 0.00 |
| ATOM | 28666 | CB  | ALA | 1913 | 96.614 | 86.445 | 58.784 | 0.00 | 0.00 |
| ATOM | 28667 | HB1 | ALA | 1913 | 97.271 | 87.308 | 58.674 | 0.00 | 0.00 |
| ATOM | 28668 | HB2 | ALA | 1913 | 97.186 | 85.522 | 58.686 | 0.00 | 0.00 |
| ATOM | 28669 | HB3 | ALA | 1913 | 95.912 | 86.468 | 57.951 | 0.00 | 0.00 |
| ATOM | 28670 | C   | ALA | 1913 | 95.209 | 88.046 | 60.358 | 0.00 | 0.00 |
| ATOM | 28671 | O   | ALA | 1913 | 95.643 | 88.996 | 61.073 | 0.00 | 0.00 |

|            |      |     |      |        |        |        |      |      |
|------------|------|-----|------|--------|--------|--------|------|------|
| ATOM 28672 | N    | THR | 1914 | 93.985 | 88.170 | 59.824 | 0.00 | 0.00 |
| ATOM 28673 | H    | THR | 1914 | 93.613 | 87.371 | 59.331 | 0.00 | 0.00 |
| ATOM 28674 | CA   | THR | 1914 | 93.445 | 89.532 | 59.507 | 0.00 | 0.00 |
| ATOM 28675 | HA   | THR | 1914 | 93.930 | 90.245 | 60.174 | 0.00 | 0.00 |
| ATOM 28676 | CB   | THR | 1914 | 93.759 | 89.995 | 58.116 | 0.00 | 0.00 |
| ATOM 28677 | HB   | THR | 1914 | 93.572 | 91.069 | 58.108 | 0.00 | 0.00 |
| ATOM 28678 | CG2  | THR | 1914 | 95.247 | 89.732 | 57.673 | 0.00 | 0.00 |
| ATOM 28679 | 1HG2 | THR | 1914 | 95.466 | 90.196 | 56.712 | 0.00 | 0.00 |
| ATOM 28680 | 2HG2 | THR | 1914 | 96.020 | 90.009 | 58.389 | 0.00 | 0.00 |
| ATOM 28681 | 3HG2 | THR | 1914 | 95.404 | 88.691 | 57.392 | 0.00 | 0.00 |
| ATOM 28682 | OG1  | THR | 1914 | 92.779 | 89.419 | 57.206 | 0.00 | 0.00 |
| ATOM 28683 | HG1  | THR | 1914 | 92.706 | 88.475 | 57.364 | 0.00 | 0.00 |
| ATOM 28684 | C    | THR | 1914 | 92.002 | 89.608 | 59.822 | 0.00 | 0.00 |
| ATOM 28685 | O    | THR | 1914 | 91.256 | 88.645 | 59.918 | 0.00 | 0.00 |
| ATOM 28686 | N    | THR | 1915 | 91.523 | 90.823 | 60.004 | 0.00 | 0.00 |
| ATOM 28687 | H    | THR | 1915 | 92.107 | 91.647 | 60.021 | 0.00 | 0.00 |
| ATOM 28688 | CA   | THR | 1915 | 90.105 | 91.168 | 60.287 | 0.00 | 0.00 |
| ATOM 28689 | HA   | THR | 1915 | 89.630 | 90.212 | 60.506 | 0.00 | 0.00 |
| ATOM 28690 | CB   | THR | 1915 | 89.921 | 92.119 | 61.501 | 0.00 | 0.00 |
| ATOM 28691 | HB   | THR | 1915 | 89.824 | 93.171 | 61.233 | 0.00 | 0.00 |
| ATOM 28692 | CG2  | THR | 1915 | 88.903 | 91.609 | 62.488 | 0.00 | 0.00 |
| ATOM 28693 | 1HG2 | THR | 1915 | 89.043 | 90.528 | 62.473 | 0.00 | 0.00 |
| ATOM 28694 | 2HG2 | THR | 1915 | 88.920 | 91.974 | 63.515 | 0.00 | 0.00 |
| ATOM 28695 | 3HG2 | THR | 1915 | 87.940 | 91.952 | 62.109 | 0.00 | 0.00 |
| ATOM 28696 | OG1  | THR | 1915 | 91.077 | 92.193 | 62.286 | 0.00 | 0.00 |
| ATOM 28697 | HG1  | THR | 1915 | 90.943 | 91.444 | 62.871 | 0.00 | 0.00 |

|      |       |      |     |      |        |        |        |      |      |
|------|-------|------|-----|------|--------|--------|--------|------|------|
| ATOM | 28698 | C    | THR | 1915 | 89.408 | 91.624 | 59.038 | 0.00 | 0.00 |
| ATOM | 28699 | O    | THR | 1915 | 88.989 | 92.821 | 58.893 | 0.00 | 0.00 |
| ATOM | 28700 | N    | CYS | 1916 | 89.356 | 90.741 | 58.033 | 0.00 | 0.00 |
| ATOM | 28701 | H    | CYS | 1916 | 89.829 | 89.859 | 58.165 | 0.00 | 0.00 |
| ATOM | 28702 | CA   | CYS | 1916 | 88.815 | 91.015 | 56.746 | 0.00 | 0.00 |
| ATOM | 28703 | HA   | CYS | 1916 | 88.215 | 91.923 | 56.788 | 0.00 | 0.00 |
| ATOM | 28704 | CB   | CYS | 1916 | 89.856 | 91.238 | 55.680 | 0.00 | 0.00 |
| ATOM | 28705 | HB2  | CYS | 1916 | 90.338 | 90.285 | 55.465 | 0.00 | 0.00 |
| ATOM | 28706 | HB3  | CYS | 1916 | 89.320 | 91.477 | 54.762 | 0.00 | 0.00 |
| ATOM | 28707 | SG   | CYS | 1916 | 91.087 | 92.591 | 56.037 | 0.00 | 0.00 |
| ATOM | 28708 | HG   | CYS | 1916 | 90.177 | 93.561 | 55.909 | 0.00 | 0.00 |
| ATOM | 28709 | C    | CYS | 1916 | 87.845 | 89.885 | 56.326 | 0.00 | 0.00 |
| ATOM | 28710 | O    | CYS | 1916 | 88.267 | 88.756 | 56.120 | 0.00 | 0.00 |
| ATOM | 28711 | N    | THR | 1917 | 86.611 | 90.170 | 56.073 | 0.00 | 0.00 |
| ATOM | 28712 | H    | THR | 1917 | 86.262 | 91.032 | 56.468 | 0.00 | 0.00 |
| ATOM | 28713 | CA   | THR | 1917 | 85.709 | 89.414 | 55.238 | 0.00 | 0.00 |
| ATOM | 28714 | HA   | THR | 1917 | 85.967 | 88.375 | 55.440 | 0.00 | 0.00 |
| ATOM | 28715 | CB   | THR | 1917 | 84.261 | 89.529 | 55.748 | 0.00 | 0.00 |
| ATOM | 28716 | HB   | THR | 1917 | 84.056 | 90.594 | 55.640 | 0.00 | 0.00 |
| ATOM | 28717 | CG2  | THR | 1917 | 83.172 | 88.738 | 55.037 | 0.00 | 0.00 |
| ATOM | 28718 | 1HG2 | THR | 1917 | 82.187 | 88.901 | 55.476 | 0.00 | 0.00 |
| ATOM | 28719 | 2HG2 | THR | 1917 | 83.156 | 88.981 | 53.975 | 0.00 | 0.00 |
| ATOM | 28720 | 3HG2 | THR | 1917 | 83.467 | 87.702 | 55.205 | 0.00 | 0.00 |
| ATOM | 28721 | OG1  | THR | 1917 | 84.065 | 89.247 | 57.120 | 0.00 | 0.00 |
| ATOM | 28722 | HG1  | THR | 1917 | 84.034 | 88.300 | 57.274 | 0.00 | 0.00 |
| ATOM | 28723 | C    | THR | 1917 | 85.885 | 89.714 | 53.767 | 0.00 | 0.00 |

|            |     |     |      |        |        |        |      |      |
|------------|-----|-----|------|--------|--------|--------|------|------|
| ATOM 28724 | O   | THR | 1917 | 85.430 | 90.802 | 53.439 | 0.00 | 0.00 |
| ATOM 28725 | N   | PRO | 1918 | 86.561 | 88.857 | 52.932 | 0.00 | 0.00 |
| ATOM 28726 | CD  | PRO | 1918 | 87.234 | 87.665 | 53.284 | 0.00 | 0.00 |
| ATOM 28727 | HD2 | PRO | 1918 | 86.639 | 86.894 | 52.794 | 0.00 | 0.00 |
| ATOM 28728 | HD3 | PRO | 1918 | 87.403 | 87.492 | 54.347 | 0.00 | 0.00 |
| ATOM 28729 | CG  | PRO | 1918 | 88.618 | 87.764 | 52.592 | 0.00 | 0.00 |
| ATOM 28730 | HG2 | PRO | 1918 | 89.329 | 88.427 | 53.085 | 0.00 | 0.00 |
| ATOM 28731 | HG3 | PRO | 1918 | 89.132 | 86.807 | 52.507 | 0.00 | 0.00 |
| ATOM 28732 | CB  | PRO | 1918 | 88.282 | 88.459 | 51.295 | 0.00 | 0.00 |
| ATOM 28733 | HB2 | PRO | 1918 | 89.183 | 88.858 | 50.830 | 0.00 | 0.00 |
| ATOM 28734 | HB3 | PRO | 1918 | 87.961 | 87.687 | 50.596 | 0.00 | 0.00 |
| ATOM 28735 | CA  | PRO | 1918 | 87.176 | 89.443 | 51.775 | 0.00 | 0.00 |
| ATOM 28736 | HA  | PRO | 1918 | 87.771 | 90.261 | 52.182 | 0.00 | 0.00 |
| ATOM 28737 | C   | PRO | 1918 | 86.184 | 89.914 | 50.672 | 0.00 | 0.00 |
| ATOM 28738 | O   | PRO | 1918 | 86.406 | 90.970 | 50.128 | 0.00 | 0.00 |
| ATOM 28739 | N   | GLY | 1919 | 85.270 | 89.029 | 50.293 | 0.00 | 0.00 |
| ATOM 28740 | H   | GLY | 1919 | 85.303 | 88.110 | 50.710 | 0.00 | 0.00 |
| ATOM 28741 | CA  | GLY | 1919 | 84.457 | 89.079 | 49.037 | 0.00 | 0.00 |
| ATOM 28742 | HA2 | GLY | 1919 | 84.830 | 89.868 | 48.384 | 0.00 | 0.00 |
| ATOM 28743 | HA3 | GLY | 1919 | 84.565 | 88.101 | 48.570 | 0.00 | 0.00 |
| ATOM 28744 | C   | GLY | 1919 | 82.886 | 89.035 | 49.296 | 0.00 | 0.00 |
| ATOM 28745 | O   | GLY | 1919 | 82.402 | 88.332 | 50.268 | 0.00 | 0.00 |
| ATOM 28746 | N   | PRO | 1920 | 82.078 | 89.623 | 48.414 | 0.00 | 0.00 |
| ATOM 28747 | CD  | PRO | 1920 | 82.621 | 90.395 | 47.281 | 0.00 | 0.00 |
| ATOM 28748 | HD2 | PRO | 1920 | 83.403 | 91.090 | 47.587 | 0.00 | 0.00 |
| ATOM 28749 | HD3 | PRO | 1920 | 83.056 | 89.763 | 46.508 | 0.00 | 0.00 |

|            |     |     |      |        |        |        |      |      |
|------------|-----|-----|------|--------|--------|--------|------|------|
| ATOM 28750 | CG  | PRO | 1920 | 81.392 | 91.015 | 46.713 | 0.00 | 0.00 |
| ATOM 28751 | HG2 | PRO | 1920 | 81.281 | 92.024 | 47.110 | 0.00 | 0.00 |
| ATOM 28752 | HG3 | PRO | 1920 | 81.496 | 90.989 | 45.629 | 0.00 | 0.00 |
| ATOM 28753 | CB  | PRO | 1920 | 80.155 | 90.254 | 47.058 | 0.00 | 0.00 |
| ATOM 28754 | HB2 | PRO | 1920 | 79.260 | 90.869 | 47.151 | 0.00 | 0.00 |
| ATOM 28755 | HB3 | PRO | 1920 | 80.119 | 89.538 | 46.237 | 0.00 | 0.00 |
| ATOM 28756 | CA  | PRO | 1920 | 80.569 | 89.727 | 48.433 | 0.00 | 0.00 |
| ATOM 28757 | HA  | PRO | 1920 | 80.128 | 90.411 | 49.157 | 0.00 | 0.00 |
| ATOM 28758 | C   | PRO | 1920 | 79.867 | 88.409 | 48.774 | 0.00 | 0.00 |
| ATOM 28759 | O   | PRO | 1920 | 78.895 | 88.487 | 49.512 | 0.00 | 0.00 |
| ATOM 28760 | N   | TRP | 1921 | 80.331 | 87.227 | 48.298 | 0.00 | 0.00 |
| ATOM 28761 | H   | TRP | 1921 | 80.941 | 87.239 | 47.493 | 0.00 | 0.00 |
| ATOM 28762 | CA  | TRP | 1921 | 79.733 | 85.961 | 48.669 | 0.00 | 0.00 |
| ATOM 28763 | HA  | TRP | 1921 | 78.671 | 86.062 | 48.446 | 0.00 | 0.00 |
| ATOM 28764 | CB  | TRP | 1921 | 80.279 | 84.937 | 47.698 | 0.00 | 0.00 |
| ATOM 28765 | HB2 | TRP | 1921 | 80.189 | 85.385 | 46.708 | 0.00 | 0.00 |
| ATOM 28766 | HB3 | TRP | 1921 | 81.349 | 84.747 | 47.784 | 0.00 | 0.00 |
| ATOM 28767 | CG  | TRP | 1921 | 79.583 | 83.577 | 47.719 | 0.00 | 0.00 |
| ATOM 28768 | CD1 | TRP | 1921 | 78.518 | 83.233 | 46.933 | 0.00 | 0.00 |
| ATOM 28769 | HD1 | TRP | 1921 | 78.126 | 83.943 | 46.220 | 0.00 | 0.00 |
| ATOM 28770 | NE1 | TRP | 1921 | 78.065 | 81.957 | 47.238 | 0.00 | 0.00 |
| ATOM 28771 | HE1 | TRP | 1921 | 77.317 | 81.449 | 46.787 | 0.00 | 0.00 |
| ATOM 28772 | CE2 | TRP | 1921 | 78.800 | 81.476 | 48.247 | 0.00 | 0.00 |
| ATOM 28773 | CZ2 | TRP | 1921 | 78.802 | 80.219 | 48.862 | 0.00 | 0.00 |
| ATOM 28774 | HZ2 | TRP | 1921 | 77.978 | 79.559 | 48.635 | 0.00 | 0.00 |
| ATOM 28775 | CH2 | TRP | 1921 | 79.840 | 79.823 | 49.723 | 0.00 | 0.00 |

|            |     |     |      |        |        |        |      |      |
|------------|-----|-----|------|--------|--------|--------|------|------|
| ATOM 28776 | HH2 | TRP | 1921 | 79.924 | 78.837 | 50.156 | 0.00 | 0.00 |
| ATOM 28777 | CZ3 | TRP | 1921 | 80.721 | 80.806 | 50.145 | 0.00 | 0.00 |
| ATOM 28778 | HZ3 | TRP | 1921 | 81.459 | 80.638 | 50.916 | 0.00 | 0.00 |
| ATOM 28779 | CE3 | TRP | 1921 | 80.799 | 82.056 | 49.537 | 0.00 | 0.00 |
| ATOM 28780 | HE3 | TRP | 1921 | 81.567 | 82.808 | 49.642 | 0.00 | 0.00 |
| ATOM 28781 | CD2 | TRP | 1921 | 79.909 | 82.362 | 48.493 | 0.00 | 0.00 |
| ATOM 28782 | C   | TRP | 1921 | 79.964 | 85.563 | 50.137 | 0.00 | 0.00 |
| ATOM 28783 | O   | TRP | 1921 | 79.007 | 85.340 | 50.899 | 0.00 | 0.00 |
| ATOM 28784 | N   | TYR | 1922 | 81.157 | 85.759 | 50.644 | 0.00 | 0.00 |
| ATOM 28785 | H   | TYR | 1922 | 81.787 | 86.315 | 50.083 | 0.00 | 0.00 |
| ATOM 28786 | CA  | TYR | 1922 | 81.452 | 85.667 | 52.066 | 0.00 | 0.00 |
| ATOM 28787 | HA  | TYR | 1922 | 80.989 | 84.722 | 52.349 | 0.00 | 0.00 |
| ATOM 28788 | CB  | TYR | 1922 | 82.976 | 85.554 | 52.213 | 0.00 | 0.00 |
| ATOM 28789 | HB2 | TYR | 1922 | 83.385 | 86.052 | 51.334 | 0.00 | 0.00 |
| ATOM 28790 | HB3 | TYR | 1922 | 83.351 | 86.246 | 52.967 | 0.00 | 0.00 |
| ATOM 28791 | CG  | TYR | 1922 | 83.417 | 84.122 | 52.463 | 0.00 | 0.00 |
| ATOM 28792 | CD1 | TYR | 1922 | 83.863 | 83.313 | 51.402 | 0.00 | 0.00 |
| ATOM 28793 | HD1 | TYR | 1922 | 84.032 | 83.727 | 50.418 | 0.00 | 0.00 |
| ATOM 28794 | CE1 | TYR | 1922 | 84.173 | 81.938 | 51.604 | 0.00 | 0.00 |
| ATOM 28795 | HE1 | TYR | 1922 | 84.624 | 81.317 | 50.844 | 0.00 | 0.00 |
| ATOM 28796 | CZ  | TYR | 1922 | 84.048 | 81.422 | 52.885 | 0.00 | 0.00 |
| ATOM 28797 | OH  | TYR | 1922 | 84.381 | 80.148 | 53.178 | 0.00 | 0.00 |
| ATOM 28798 | HH  | TYR | 1922 | 84.713 | 79.623 | 52.446 | 0.00 | 0.00 |
| ATOM 28799 | CE2 | TYR | 1922 | 83.393 | 82.182 | 53.896 | 0.00 | 0.00 |
| ATOM 28800 | HE2 | TYR | 1922 | 83.172 | 81.704 | 54.839 | 0.00 | 0.00 |
| ATOM 28801 | CD2 | TYR | 1922 | 83.138 | 83.515 | 53.741 | 0.00 | 0.00 |

|            |      |     |      |        |        |        |      |      |
|------------|------|-----|------|--------|--------|--------|------|------|
| ATOM 28802 | HD2  | TYR | 1922 | 82.604 | 84.040 | 54.519 | 0.00 | 0.00 |
| ATOM 28803 | C    | TYR | 1922 | 80.867 | 86.812 | 52.857 | 0.00 | 0.00 |
| ATOM 28804 | O    | TYR | 1922 | 80.490 | 86.547 | 54.009 | 0.00 | 0.00 |
| ATOM 28805 | N    | ILE | 1923 | 80.660 | 88.050 | 52.338 | 0.00 | 0.00 |
| ATOM 28806 | H    | ILE | 1923 | 80.816 | 88.183 | 51.349 | 0.00 | 0.00 |
| ATOM 28807 | CA   | ILE | 1923 | 80.116 | 89.182 | 53.055 | 0.00 | 0.00 |
| ATOM 28808 | HA   | ILE | 1923 | 80.443 | 89.180 | 54.094 | 0.00 | 0.00 |
| ATOM 28809 | CB   | ILE | 1923 | 80.335 | 90.565 | 52.291 | 0.00 | 0.00 |
| ATOM 28810 | HB   | ILE | 1923 | 79.904 | 90.480 | 51.294 | 0.00 | 0.00 |
| ATOM 28811 | CG2  | ILE | 1923 | 79.564 | 91.780 | 52.883 | 0.00 | 0.00 |
| ATOM 28812 | 1HG2 | ILE | 1923 | 80.112 | 92.176 | 53.738 | 0.00 | 0.00 |
| ATOM 28813 | 2HG2 | ILE | 1923 | 79.566 | 92.574 | 52.135 | 0.00 | 0.00 |
| ATOM 28814 | 3HG2 | ILE | 1923 | 78.527 | 91.663 | 53.197 | 0.00 | 0.00 |
| ATOM 28815 | CG1  | ILE | 1923 | 81.851 | 90.945 | 52.186 | 0.00 | 0.00 |
| ATOM 28816 | 2HG1 | ILE | 1923 | 82.321 | 91.212 | 53.133 | 0.00 | 0.00 |
| ATOM 28817 | 3HG1 | ILE | 1923 | 82.384 | 90.023 | 51.955 | 0.00 | 0.00 |
| ATOM 28818 | CD1  | ILE | 1923 | 82.269 | 92.013 | 51.165 | 0.00 | 0.00 |
| ATOM 28819 | 1HD1 | ILE | 1923 | 83.350 | 92.152 | 51.160 | 0.00 | 0.00 |
| ATOM 28820 | 2HD1 | ILE | 1923 | 82.067 | 91.535 | 50.207 | 0.00 | 0.00 |
| ATOM 28821 | 3HD1 | ILE | 1923 | 81.880 | 93.011 | 51.368 | 0.00 | 0.00 |
| ATOM 28822 | C    | ILE | 1923 | 78.579 | 88.856 | 53.263 | 0.00 | 0.00 |
| ATOM 28823 | O    | ILE | 1923 | 78.062 | 88.920 | 54.346 | 0.00 | 0.00 |
| ATOM 28824 | N    | SER | 1924 | 77.935 | 88.316 | 52.158 | 0.00 | 0.00 |
| ATOM 28825 | H    | SER | 1924 | 78.397 | 88.225 | 51.264 | 0.00 | 0.00 |
| ATOM 28826 | CA   | SER | 1924 | 76.583 | 87.787 | 52.269 | 0.00 | 0.00 |
| ATOM 28827 | HA   | SER | 1924 | 75.973 | 88.566 | 52.728 | 0.00 | 0.00 |



|            |      |     |      |        |        |        |      |      |
|------------|------|-----|------|--------|--------|--------|------|------|
| ATOM 28828 | CB   | SER | 1924 | 76.028 | 87.335 | 50.963 | 0.00 | 0.00 |
| ATOM 28829 | HB2  | SER | 1924 | 76.571 | 86.547 | 50.442 | 0.00 | 0.00 |
| ATOM 28830 | HB3  | SER | 1924 | 74.990 | 87.000 | 50.967 | 0.00 | 0.00 |
| ATOM 28831 | OG   | SER | 1924 | 76.206 | 88.498 | 50.145 | 0.00 | 0.00 |
| ATOM 28832 | HG   | SER | 1924 | 77.132 | 88.502 | 49.893 | 0.00 | 0.00 |
| ATOM 28833 | C    | SER | 1924 | 76.371 | 86.599 | 53.169 | 0.00 | 0.00 |
| ATOM 28834 | O    | SER | 1924 | 75.473 | 86.682 | 53.969 | 0.00 | 0.00 |
| ATOM 28835 | N    | ARG | 1925 | 77.254 | 85.538 | 53.190 | 0.00 | 0.00 |
| ATOM 28836 | H    | ARG | 1925 | 78.146 | 85.579 | 52.719 | 0.00 | 0.00 |
| ATOM 28837 | CA   | ARG | 1925 | 77.202 | 84.428 | 54.166 | 0.00 | 0.00 |
| ATOM 28838 | HA   | ARG | 1925 | 76.243 | 83.910 | 54.176 | 0.00 | 0.00 |
| ATOM 28839 | CB   | ARG | 1925 | 78.173 | 83.359 | 53.742 | 0.00 | 0.00 |
| ATOM 28840 | HB2  | ARG | 1925 | 78.453 | 82.775 | 54.619 | 0.00 | 0.00 |
| ATOM 28841 | HB3  | ARG | 1925 | 79.076 | 83.826 | 53.348 | 0.00 | 0.00 |
| ATOM 28842 | CG   | ARG | 1925 | 77.585 | 82.338 | 52.766 | 0.00 | 0.00 |
| ATOM 28843 | HG2  | ARG | 1925 | 78.361 | 81.573 | 52.740 | 0.00 | 0.00 |
| ATOM 28844 | HG3  | ARG | 1925 | 76.703 | 81.941 | 53.268 | 0.00 | 0.00 |
| ATOM 28845 | CD   | ARG | 1925 | 77.250 | 82.769 | 51.364 | 0.00 | 0.00 |
| ATOM 28846 | HD2  | ARG | 1925 | 78.023 | 83.302 | 50.810 | 0.00 | 0.00 |
| ATOM 28847 | HD3  | ARG | 1925 | 77.116 | 81.865 | 50.771 | 0.00 | 0.00 |
| ATOM 28848 | NE   | ARG | 1925 | 76.022 | 83.554 | 51.195 | 0.00 | 0.00 |
| ATOM 28849 | HE   | ARG | 1925 | 75.387 | 83.697 | 51.968 | 0.00 | 0.00 |
| ATOM 28850 | CZ   | ARG | 1925 | 75.590 | 84.039 | 50.012 | 0.00 | 0.00 |
| ATOM 28851 | NH1  | ARG | 1925 | 74.371 | 84.431 | 49.964 | 0.00 | 0.00 |
| ATOM 28852 | 1HH1 | ARG | 1925 | 73.952 | 84.735 | 49.097 | 0.00 | 0.00 |
| ATOM 28853 | 2HH1 | ARG | 1925 | 73.876 | 84.379 | 50.842 | 0.00 | 0.00 |

|            |      |     |      |        |        |        |      |      |
|------------|------|-----|------|--------|--------|--------|------|------|
| ATOM 28854 | NH2  | ARG | 1925 | 76.283 | 84.032 | 48.847 | 0.00 | 0.00 |
| ATOM 28855 | 1HH2 | ARG | 1925 | 75.852 | 84.421 | 48.021 | 0.00 | 0.00 |
| ATOM 28856 | 2HH2 | ARG | 1925 | 77.215 | 83.644 | 48.870 | 0.00 | 0.00 |
| ATOM 28857 | C    | ARG | 1925 | 77.554 | 84.924 | 55.574 | 0.00 | 0.00 |
| ATOM 28858 | O    | ARG | 1925 | 76.803 | 84.514 | 56.423 | 0.00 | 0.00 |
| ATOM 28859 | N    | MET | 1926 | 78.610 | 85.774 | 55.816 | 0.00 | 0.00 |
| ATOM 28860 | H    | MET | 1926 | 79.249 | 86.052 | 55.085 | 0.00 | 0.00 |
| ATOM 28861 | CA   | MET | 1926 | 78.785 | 86.383 | 57.201 | 0.00 | 0.00 |
| ATOM 28862 | HA   | MET | 1926 | 78.881 | 85.602 | 57.956 | 0.00 | 0.00 |
| ATOM 28863 | CB   | MET | 1926 | 80.122 | 87.082 | 57.239 | 0.00 | 0.00 |
| ATOM 28864 | HB2  | MET | 1926 | 80.244 | 87.854 | 56.479 | 0.00 | 0.00 |
| ATOM 28865 | HB3  | MET | 1926 | 80.020 | 87.542 | 58.222 | 0.00 | 0.00 |
| ATOM 28866 | CG   | MET | 1926 | 81.437 | 86.165 | 57.220 | 0.00 | 0.00 |
| ATOM 28867 | HG2  | MET | 1926 | 81.597 | 85.747 | 56.226 | 0.00 | 0.00 |
| ATOM 28868 | HG3  | MET | 1926 | 82.331 | 86.707 | 57.531 | 0.00 | 0.00 |
| ATOM 28869 | SD   | MET | 1926 | 81.199 | 84.725 | 58.423 | 0.00 | 0.00 |
| ATOM 28870 | CE   | MET | 1926 | 81.269 | 85.748 | 59.888 | 0.00 | 0.00 |
| ATOM 28871 | HE1  | MET | 1926 | 80.566 | 86.581 | 59.914 | 0.00 | 0.00 |
| ATOM 28872 | HE2  | MET | 1926 | 81.157 | 85.055 | 60.722 | 0.00 | 0.00 |
| ATOM 28873 | HE3  | MET | 1926 | 82.299 | 86.093 | 59.979 | 0.00 | 0.00 |
| ATOM 28874 | C    | MET | 1926 | 77.623 | 87.351 | 57.632 | 0.00 | 0.00 |
| ATOM 28875 | O    | MET | 1926 | 77.501 | 87.508 | 58.820 | 0.00 | 0.00 |
| ATOM 28876 | N    | LEU | 1927 | 76.796 | 87.968 | 56.725 | 0.00 | 0.00 |
| ATOM 28877 | H    | LEU | 1927 | 77.006 | 88.131 | 55.751 | 0.00 | 0.00 |
| ATOM 28878 | CA   | LEU | 1927 | 75.570 | 88.587 | 57.104 | 0.00 | 0.00 |
| ATOM 28879 | HA   | LEU | 1927 | 75.604 | 89.177 | 58.020 | 0.00 | 0.00 |

|            |      |     |      |        |        |        |      |      |
|------------|------|-----|------|--------|--------|--------|------|------|
| ATOM 28880 | CB   | LEU | 1927 | 74.989 | 89.530 | 56.079 | 0.00 | 0.00 |
| ATOM 28881 | HB2  | LEU | 1927 | 75.032 | 89.087 | 55.084 | 0.00 | 0.00 |
| ATOM 28882 | HB3  | LEU | 1927 | 73.935 | 89.585 | 56.354 | 0.00 | 0.00 |
| ATOM 28883 | CG   | LEU | 1927 | 75.693 | 90.879 | 56.087 | 0.00 | 0.00 |
| ATOM 28884 | HG   | LEU | 1927 | 76.773 | 90.735 | 56.059 | 0.00 | 0.00 |
| ATOM 28885 | CD1  | LEU | 1927 | 75.175 | 91.795 | 54.950 | 0.00 | 0.00 |
| ATOM 28886 | 1HD1 | LEU | 1927 | 75.538 | 91.315 | 54.041 | 0.00 | 0.00 |
| ATOM 28887 | 2HD1 | LEU | 1927 | 74.087 | 91.861 | 54.949 | 0.00 | 0.00 |
| ATOM 28888 | 3HD1 | LEU | 1927 | 75.718 | 92.740 | 54.945 | 0.00 | 0.00 |
| ATOM 28889 | CD2  | LEU | 1927 | 75.333 | 91.719 | 57.374 | 0.00 | 0.00 |
| ATOM 28890 | 1HD2 | LEU | 1927 | 74.254 | 91.847 | 57.460 | 0.00 | 0.00 |
| ATOM 28891 | 2HD2 | LEU | 1927 | 75.461 | 91.182 | 58.315 | 0.00 | 0.00 |
| ATOM 28892 | 3HD2 | LEU | 1927 | 75.884 | 92.645 | 57.535 | 0.00 | 0.00 |
| ATOM 28893 | C    | LEU | 1927 | 74.502 | 87.557 | 57.495 | 0.00 | 0.00 |
| ATOM 28894 | O    | LEU | 1927 | 73.751 | 87.634 | 58.488 | 0.00 | 0.00 |
| ATOM 28895 | N    | GLN | 1928 | 74.464 | 86.574 | 56.687 | 0.00 | 0.00 |
| ATOM 28896 | H    | GLN | 1928 | 75.082 | 86.656 | 55.892 | 0.00 | 0.00 |
| ATOM 28897 | CA   | GLN | 1928 | 73.455 | 85.494 | 56.765 | 0.00 | 0.00 |
| ATOM 28898 | HA   | GLN | 1928 | 72.436 | 85.860 | 56.889 | 0.00 | 0.00 |
| ATOM 28899 | CB   | GLN | 1928 | 73.477 | 84.615 | 55.586 | 0.00 | 0.00 |
| ATOM 28900 | HB2  | GLN | 1928 | 74.529 | 84.568 | 55.301 | 0.00 | 0.00 |
| ATOM 28901 | HB3  | GLN | 1928 | 73.138 | 83.597 | 55.774 | 0.00 | 0.00 |
| ATOM 28902 | CG   | GLN | 1928 | 72.675 | 85.141 | 54.404 | 0.00 | 0.00 |
| ATOM 28903 | HG2  | GLN | 1928 | 71.712 | 84.992 | 54.893 | 0.00 | 0.00 |
| ATOM 28904 | HG3  | GLN | 1928 | 72.828 | 86.198 | 54.186 | 0.00 | 0.00 |
| ATOM 28905 | CD   | GLN | 1928 | 72.666 | 84.235 | 53.114 | 0.00 | 0.00 |

|            |      |     |      |        |        |        |      |      |
|------------|------|-----|------|--------|--------|--------|------|------|
| ATOM 28906 | OE1  | GLN | 1928 | 73.622 | 83.723 | 52.599 | 0.00 | 0.00 |
| ATOM 28907 | NE2  | GLN | 1928 | 71.477 | 84.041 | 52.552 | 0.00 | 0.00 |
| ATOM 28908 | 1HE2 | GLN | 1928 | 71.573 | 83.569 | 51.664 | 0.00 | 0.00 |
| ATOM 28909 | 2HE2 | GLN | 1928 | 70.586 | 84.205 | 52.998 | 0.00 | 0.00 |
| ATOM 28910 | C    | GLN | 1928 | 73.735 | 84.618 | 57.997 | 0.00 | 0.00 |
| ATOM 28911 | O    | GLN | 1928 | 72.768 | 84.215 | 58.619 | 0.00 | 0.00 |
| ATOM 28912 | N    | ALA | 1929 | 74.912 | 84.283 | 58.401 | 0.00 | 0.00 |
| ATOM 28913 | H    | ALA | 1929 | 75.624 | 84.560 | 57.741 | 0.00 | 0.00 |
| ATOM 28914 | CA   | ALA | 1929 | 75.355 | 83.655 | 59.577 | 0.00 | 0.00 |
| ATOM 28915 | HA   | ALA | 1929 | 74.791 | 82.736 | 59.737 | 0.00 | 0.00 |
| ATOM 28916 | CB   | ALA | 1929 | 76.794 | 83.432 | 59.399 | 0.00 | 0.00 |
| ATOM 28917 | HB1  | ALA | 1929 | 77.248 | 84.402 | 59.195 | 0.00 | 0.00 |
| ATOM 28918 | HB2  | ALA | 1929 | 77.249 | 82.984 | 60.282 | 0.00 | 0.00 |
| ATOM 28919 | HB3  | ALA | 1929 | 77.039 | 82.716 | 58.614 | 0.00 | 0.00 |
| ATOM 28920 | C    | ALA | 1929 | 75.061 | 84.521 | 60.808 | 0.00 | 0.00 |
| ATOM 28921 | O    | ALA | 1929 | 74.451 | 84.153 | 61.787 | 0.00 | 0.00 |
| ATOM 28922 | N    | ALA | 1930 | 75.419 | 85.850 | 60.732 | 0.00 | 0.00 |
| ATOM 28923 | H    | ALA | 1930 | 76.183 | 86.119 | 60.128 | 0.00 | 0.00 |
| ATOM 28924 | CA   | ALA | 1930 | 75.211 | 86.655 | 61.877 | 0.00 | 0.00 |
| ATOM 28925 | HA   | ALA | 1930 | 75.542 | 86.139 | 62.778 | 0.00 | 0.00 |
| ATOM 28926 | CB   | ALA | 1930 | 76.146 | 87.967 | 61.646 | 0.00 | 0.00 |
| ATOM 28927 | HB1  | ALA | 1930 | 75.809 | 88.475 | 60.742 | 0.00 | 0.00 |
| ATOM 28928 | HB2  | ALA | 1930 | 76.071 | 88.692 | 62.456 | 0.00 | 0.00 |
| ATOM 28929 | HB3  | ALA | 1930 | 77.183 | 87.710 | 61.431 | 0.00 | 0.00 |
| ATOM 28930 | C    | ALA | 1930 | 73.796 | 87.080 | 62.219 | 0.00 | 0.00 |
| ATOM 28931 | O    | ALA | 1930 | 73.476 | 87.299 | 63.439 | 0.00 | 0.00 |

|            |     |     |      |        |        |        |      |      |
|------------|-----|-----|------|--------|--------|--------|------|------|
| ATOM 28932 | N   | ASP | 1931 | 72.936 | 87.027 | 61.228 | 0.00 | 0.00 |
| ATOM 28933 | H   | ASP | 1931 | 73.357 | 86.699 | 60.371 | 0.00 | 0.00 |
| ATOM 28934 | CA  | ASP | 1931 | 71.476 | 87.212 | 61.310 | 0.00 | 0.00 |
| ATOM 28935 | HA  | ASP | 1931 | 71.350 | 88.272 | 61.532 | 0.00 | 0.00 |
| ATOM 28936 | CB  | ASP | 1931 | 70.913 | 87.202 | 59.927 | 0.00 | 0.00 |
| ATOM 28937 | HB2 | ASP | 1931 | 71.401 | 87.986 | 59.347 | 0.00 | 0.00 |
| ATOM 28938 | HB3 | ASP | 1931 | 71.146 | 86.269 | 59.414 | 0.00 | 0.00 |
| ATOM 28939 | CG  | ASP | 1931 | 69.444 | 87.521 | 59.840 | 0.00 | 0.00 |
| ATOM 28940 | OD1 | ASP | 1931 | 68.593 | 86.729 | 59.344 | 0.00 | 0.00 |
| ATOM 28941 | OD2 | ASP | 1931 | 69.085 | 88.684 | 60.137 | 0.00 | 0.00 |
| ATOM 28942 | C   | ASP | 1931 | 70.862 | 86.140 | 62.282 | 0.00 | 0.00 |
| ATOM 28943 | O   | ASP | 1931 | 69.652 | 86.231 | 62.587 | 0.00 | 0.00 |
| ATOM 28944 | N   | SER | 1932 | 71.671 | 85.214 | 62.760 | 0.00 | 0.00 |
| ATOM 28945 | H   | SER | 1932 | 72.627 | 85.290 | 62.443 | 0.00 | 0.00 |
| ATOM 28946 | CA  | SER | 1932 | 71.308 | 84.008 | 63.611 | 0.00 | 0.00 |
| ATOM 28947 | HA  | SER | 1932 | 70.349 | 84.221 | 64.083 | 0.00 | 0.00 |
| ATOM 28948 | CB  | SER | 1932 | 71.025 | 82.737 | 62.848 | 0.00 | 0.00 |
| ATOM 28949 | HB2 | SER | 1932 | 71.930 | 82.393 | 62.347 | 0.00 | 0.00 |
| ATOM 28950 | HB3 | SER | 1932 | 70.824 | 81.974 | 63.600 | 0.00 | 0.00 |
| ATOM 28951 | OG  | SER | 1932 | 69.836 | 82.904 | 62.021 | 0.00 | 0.00 |
| ATOM 28952 | HG  | SER | 1932 | 70.169 | 83.156 | 61.157 | 0.00 | 0.00 |
| ATOM 28953 | C   | SER | 1932 | 72.231 | 83.856 | 64.861 | 0.00 | 0.00 |
| ATOM 28954 | O   | SER | 1932 | 72.722 | 82.757 | 65.196 | 0.00 | 0.00 |
| ATOM 28955 | N   | LEU | 1933 | 72.717 | 85.020 | 65.371 | 0.00 | 0.00 |
| ATOM 28956 | H   | LEU | 1933 | 72.436 | 85.830 | 64.838 | 0.00 | 0.00 |
| ATOM 28957 | CA  | LEU | 1933 | 73.591 | 85.228 | 66.591 | 0.00 | 0.00 |

|            |      |     |      |        |        |        |      |      |
|------------|------|-----|------|--------|--------|--------|------|------|
| ATOM 28958 | HA   | LEU | 1933 | 73.517 | 84.297 | 67.154 | 0.00 | 0.00 |
| ATOM 28959 | CB   | LEU | 1933 | 75.050 | 85.582 | 66.149 | 0.00 | 0.00 |
| ATOM 28960 | HB2  | LEU | 1933 | 75.151 | 86.361 | 65.393 | 0.00 | 0.00 |
| ATOM 28961 | HB3  | LEU | 1933 | 75.524 | 85.996 | 67.040 | 0.00 | 0.00 |
| ATOM 28962 | CG   | LEU | 1933 | 75.885 | 84.428 | 65.638 | 0.00 | 0.00 |
| ATOM 28963 | HG   | LEU | 1933 | 75.371 | 84.167 | 64.713 | 0.00 | 0.00 |
| ATOM 28964 | CD1  | LEU | 1933 | 77.240 | 84.942 | 65.230 | 0.00 | 0.00 |
| ATOM 28965 | 1HD1 | LEU | 1933 | 77.820 | 85.190 | 66.119 | 0.00 | 0.00 |
| ATOM 28966 | 2HD1 | LEU | 1933 | 77.755 | 84.256 | 64.557 | 0.00 | 0.00 |
| ATOM 28967 | 3HD1 | LEU | 1933 | 77.125 | 85.883 | 64.693 | 0.00 | 0.00 |
| ATOM 28968 | CD2  | LEU | 1933 | 76.069 | 83.159 | 66.498 | 0.00 | 0.00 |
| ATOM 28969 | 1HD2 | LEU | 1933 | 76.918 | 82.515 | 66.267 | 0.00 | 0.00 |
| ATOM 28970 | 2HD2 | LEU | 1933 | 76.312 | 83.652 | 67.440 | 0.00 | 0.00 |
| ATOM 28971 | 3HD2 | LEU | 1933 | 75.157 | 82.564 | 66.471 | 0.00 | 0.00 |
| ATOM 28972 | C    | LEU | 1933 | 72.923 | 86.251 | 67.512 | 0.00 | 0.00 |
| ATOM 28973 | O    | LEU | 1933 | 72.362 | 87.186 | 66.948 | 0.00 | 0.00 |
| ATOM 28974 | N    | PRO | 1934 | 73.013 | 86.302 | 68.850 | 0.00 | 0.00 |
| ATOM 28975 | CD   | PRO | 1934 | 73.755 | 85.340 | 69.646 | 0.00 | 0.00 |
| ATOM 28976 | HD2  | PRO | 1934 | 73.356 | 84.326 | 69.630 | 0.00 | 0.00 |
| ATOM 28977 | HD3  | PRO | 1934 | 74.829 | 85.368 | 69.459 | 0.00 | 0.00 |
| ATOM 28978 | CG   | PRO | 1934 | 73.433 | 85.778 | 71.102 | 0.00 | 0.00 |
| ATOM 28979 | HG2  | PRO | 1934 | 73.232 | 84.866 | 71.665 | 0.00 | 0.00 |
| ATOM 28980 | HG3  | PRO | 1934 | 74.309 | 86.344 | 71.420 | 0.00 | 0.00 |
| ATOM 28981 | CB   | PRO | 1934 | 72.138 | 86.677 | 70.974 | 0.00 | 0.00 |
| ATOM 28982 | HB2  | PRO | 1934 | 71.323 | 85.954 | 70.946 | 0.00 | 0.00 |
| ATOM 28983 | HB3  | PRO | 1934 | 72.017 | 87.389 | 71.791 | 0.00 | 0.00 |

|            |      |     |      |        |        |        |      |      |
|------------|------|-----|------|--------|--------|--------|------|------|
| ATOM 28984 | CA   | PRO | 1934 | 72.284 | 87.317 | 69.580 | 0.00 | 0.00 |
| ATOM 28985 | HA   | PRO | 1934 | 71.350 | 87.528 | 69.059 | 0.00 | 0.00 |
| ATOM 28986 | C    | PRO | 1934 | 72.935 | 88.676 | 69.707 | 0.00 | 0.00 |
| ATOM 28987 | O    | PRO | 1934 | 72.285 | 89.572 | 70.227 | 0.00 | 0.00 |
| ATOM 28988 | N    | VAL | 1935 | 74.239 | 88.851 | 69.332 | 0.00 | 0.00 |
| ATOM 28989 | H    | VAL | 1935 | 74.706 | 88.159 | 68.764 | 0.00 | 0.00 |
| ATOM 28990 | CA   | VAL | 1935 | 75.032 | 90.134 | 69.490 | 0.00 | 0.00 |
| ATOM 28991 | HA   | VAL | 1935 | 74.717 | 90.756 | 70.329 | 0.00 | 0.00 |
| ATOM 28992 | CB   | VAL | 1935 | 76.561 | 89.861 | 69.697 | 0.00 | 0.00 |
| ATOM 28993 | HB   | VAL | 1935 | 77.179 | 90.757 | 69.655 | 0.00 | 0.00 |
| ATOM 28994 | CG1  | VAL | 1935 | 76.720 | 89.180 | 71.065 | 0.00 | 0.00 |
| ATOM 28995 | 1HG1 | VAL | 1935 | 77.754 | 88.879 | 71.232 | 0.00 | 0.00 |
| ATOM 28996 | 2HG1 | VAL | 1935 | 76.302 | 89.857 | 71.810 | 0.00 | 0.00 |
| ATOM 28997 | 3HG1 | VAL | 1935 | 76.197 | 88.224 | 71.061 | 0.00 | 0.00 |
| ATOM 28998 | CG2  | VAL | 1935 | 77.077 | 88.809 | 68.678 | 0.00 | 0.00 |
| ATOM 28999 | 1HG2 | VAL | 1935 | 78.151 | 88.675 | 68.809 | 0.00 | 0.00 |
| ATOM 29000 | 2HG2 | VAL | 1935 | 76.559 | 87.856 | 68.790 | 0.00 | 0.00 |
| ATOM 29001 | 3HG2 | VAL | 1935 | 76.846 | 89.235 | 67.702 | 0.00 | 0.00 |
| ATOM 29002 | C    | VAL | 1935 | 74.796 | 90.989 | 68.214 | 0.00 | 0.00 |
| ATOM 29003 | O    | VAL | 1935 | 74.573 | 90.347 | 67.143 | 0.00 | 0.00 |
| ATOM 29004 | N    | ASN | 1936 | 74.872 | 92.360 | 68.332 | 0.00 | 0.00 |
| ATOM 29005 | H    | ASN | 1936 | 75.180 | 92.748 | 69.212 | 0.00 | 0.00 |
| ATOM 29006 | CA   | ASN | 1936 | 74.764 | 93.232 | 67.150 | 0.00 | 0.00 |
| ATOM 29007 | HA   | ASN | 1936 | 73.962 | 92.935 | 66.474 | 0.00 | 0.00 |
| ATOM 29008 | CB   | ASN | 1936 | 74.442 | 94.702 | 67.644 | 0.00 | 0.00 |
| ATOM 29009 | HB2  | ASN | 1936 | 75.325 | 95.261 | 67.955 | 0.00 | 0.00 |

|            |               |        |        |        |      |      |
|------------|---------------|--------|--------|--------|------|------|
| ATOM 29010 | HB3 ASN 1936  | 73.919 | 95.193 | 66.823 | 0.00 | 0.00 |
| ATOM 29011 | CG ASN 1936   | 73.425 | 94.818 | 68.722 | 0.00 | 0.00 |
| ATOM 29012 | OD1 ASN 1936  | 72.303 | 94.326 | 68.715 | 0.00 | 0.00 |
| ATOM 29013 | ND2 ASN 1936  | 73.806 | 95.483 | 69.824 | 0.00 | 0.00 |
| ATOM 29014 | 1HD2 ASN 1936 | 73.203 | 95.494 | 70.634 | 0.00 | 0.00 |
| ATOM 29015 | 2HD2 ASN 1936 | 74.743 | 95.821 | 69.990 | 0.00 | 0.00 |
| ATOM 29016 | C ASN 1936    | 76.070 | 93.199 | 66.319 | 0.00 | 0.00 |
| ATOM 29017 | O ASN 1936    | 77.135 | 93.497 | 66.842 | 0.00 | 0.00 |
| ATOM 29018 | N ILE 1937    | 75.991 | 92.877 | 65.012 | 0.00 | 0.00 |
| ATOM 29019 | H ILE 1937    | 75.145 | 93.170 | 64.544 | 0.00 | 0.00 |
| ATOM 29020 | CA ILE 1937   | 77.115 | 92.541 | 64.129 | 0.00 | 0.00 |
| ATOM 29021 | HA ILE 1937   | 78.043 | 92.768 | 64.653 | 0.00 | 0.00 |
| ATOM 29022 | CB ILE 1937   | 77.328 | 90.929 | 63.978 | 0.00 | 0.00 |
| ATOM 29023 | HB ILE 1937   | 76.361 | 90.444 | 63.847 | 0.00 | 0.00 |
| ATOM 29024 | CG2 ILE 1937  | 78.165 | 90.590 | 62.727 | 0.00 | 0.00 |
| ATOM 29025 | 1HG2 ILE 1937 | 77.641 | 90.976 | 61.853 | 0.00 | 0.00 |
| ATOM 29026 | 2HG2 ILE 1937 | 79.171 | 91.007 | 62.676 | 0.00 | 0.00 |
| ATOM 29027 | 3HG2 ILE 1937 | 78.219 | 89.502 | 62.749 | 0.00 | 0.00 |
| ATOM 29028 | CG1 ILE 1937  | 78.012 | 90.452 | 65.268 | 0.00 | 0.00 |
| ATOM 29029 | 2HG1 ILE 1937 | 79.044 | 90.802 | 65.282 | 0.00 | 0.00 |
| ATOM 29030 | 3HG1 ILE 1937 | 77.567 | 90.903 | 66.155 | 0.00 | 0.00 |
| ATOM 29031 | CD1 ILE 1937  | 78.042 | 88.883 | 65.297 | 0.00 | 0.00 |
| ATOM 29032 | 1HD1 ILE 1937 | 77.022 | 88.502 | 65.272 | 0.00 | 0.00 |
| ATOM 29033 | 2HD1 ILE 1937 | 78.617 | 88.423 | 64.493 | 0.00 | 0.00 |
| ATOM 29034 | 3HD1 ILE 1937 | 78.416 | 88.511 | 66.251 | 0.00 | 0.00 |
| ATOM 29035 | C ILE 1937    | 77.136 | 93.380 | 62.815 | 0.00 | 0.00 |



|            |      |     |      |        |        |        |      |      |
|------------|------|-----|------|--------|--------|--------|------|------|
| ATOM 29036 | O    | ILE | 1937 | 76.154 | 93.540 | 62.097 | 0.00 | 0.00 |
| ATOM 29037 | N    | GLY | 1938 | 78.348 | 93.920 | 62.566 | 0.00 | 0.00 |
| ATOM 29038 | H    | GLY | 1938 | 79.083 | 93.580 | 63.169 | 0.00 | 0.00 |
| ATOM 29039 | CA   | GLY | 1938 | 78.930 | 94.730 | 61.483 | 0.00 | 0.00 |
| ATOM 29040 | HA2  | GLY | 1938 | 79.065 | 95.801 | 61.629 | 0.00 | 0.00 |
| ATOM 29041 | HA3  | GLY | 1938 | 78.259 | 94.549 | 60.643 | 0.00 | 0.00 |
| ATOM 29042 | C    | GLY | 1938 | 80.271 | 94.111 | 61.039 | 0.00 | 0.00 |
| ATOM 29043 | O    | GLY | 1938 | 81.023 | 93.583 | 61.865 | 0.00 | 0.00 |
| ATOM 29044 | N    | LEU | 1939 | 80.532 | 94.097 | 59.708 | 0.00 | 0.00 |
| ATOM 29045 | H    | LEU | 1939 | 79.799 | 94.533 | 59.167 | 0.00 | 0.00 |
| ATOM 29046 | CA   | LEU | 1939 | 81.654 | 93.392 | 59.013 | 0.00 | 0.00 |
| ATOM 29047 | HA   | LEU | 1939 | 82.145 | 92.570 | 59.534 | 0.00 | 0.00 |
| ATOM 29048 | CB   | LEU | 1939 | 81.105 | 92.616 | 57.817 | 0.00 | 0.00 |
| ATOM 29049 | HB2  | LEU | 1939 | 80.660 | 93.334 | 57.128 | 0.00 | 0.00 |
| ATOM 29050 | HB3  | LEU | 1939 | 81.919 | 92.118 | 57.291 | 0.00 | 0.00 |
| ATOM 29051 | CG   | LEU | 1939 | 79.940 | 91.646 | 58.277 | 0.00 | 0.00 |
| ATOM 29052 | HG   | LEU | 1939 | 79.148 | 92.166 | 58.817 | 0.00 | 0.00 |
| ATOM 29053 | CD1  | LEU | 1939 | 79.412 | 91.104 | 56.919 | 0.00 | 0.00 |
| ATOM 29054 | 1HD1 | LEU | 1939 | 79.057 | 91.962 | 56.348 | 0.00 | 0.00 |
| ATOM 29055 | 2HD1 | LEU | 1939 | 80.215 | 90.631 | 56.354 | 0.00 | 0.00 |
| ATOM 29056 | 3HD1 | LEU | 1939 | 78.538 | 90.491 | 57.139 | 0.00 | 0.00 |
| ATOM 29057 | CD2  | LEU | 1939 | 80.414 | 90.568 | 59.264 | 0.00 | 0.00 |
| ATOM 29058 | 1HD2 | LEU | 1939 | 79.672 | 89.818 | 59.541 | 0.00 | 0.00 |
| ATOM 29059 | 2HD2 | LEU | 1939 | 81.306 | 90.127 | 58.818 | 0.00 | 0.00 |
| ATOM 29060 | 3HD2 | LEU | 1939 | 80.633 | 90.994 | 60.243 | 0.00 | 0.00 |
| ATOM 29061 | C    | LEU | 1939 | 82.675 | 94.389 | 58.469 | 0.00 | 0.00 |

|            |      |     |      |        |        |        |      |      |
|------------|------|-----|------|--------|--------|--------|------|------|
| ATOM 29062 | O    | LEU | 1939 | 82.330 | 95.478 | 57.998 | 0.00 | 0.00 |
| ATOM 29063 | N    | LEU | 1940 | 83.967 | 94.064 | 58.517 | 0.00 | 0.00 |
| ATOM 29064 | H    | LEU | 1940 | 84.157 | 93.199 | 59.003 | 0.00 | 0.00 |
| ATOM 29065 | CA   | LEU | 1940 | 85.127 | 94.759 | 57.845 | 0.00 | 0.00 |
| ATOM 29066 | HA   | LEU | 1940 | 84.666 | 95.726 | 57.641 | 0.00 | 0.00 |
| ATOM 29067 | CB   | LEU | 1940 | 86.253 | 94.885 | 58.937 | 0.00 | 0.00 |
| ATOM 29068 | HB2  | LEU | 1940 | 86.423 | 93.830 | 59.151 | 0.00 | 0.00 |
| ATOM 29069 | HB3  | LEU | 1940 | 87.171 | 95.206 | 58.445 | 0.00 | 0.00 |
| ATOM 29070 | CG   | LEU | 1940 | 86.031 | 95.836 | 60.158 | 0.00 | 0.00 |
| ATOM 29071 | HG   | LEU | 1940 | 85.099 | 95.541 | 60.641 | 0.00 | 0.00 |
| ATOM 29072 | CD1  | LEU | 1940 | 87.126 | 95.715 | 61.199 | 0.00 | 0.00 |
| ATOM 29073 | 1HD1 | LEU | 1940 | 86.792 | 96.340 | 62.027 | 0.00 | 0.00 |
| ATOM 29074 | 2HD1 | LEU | 1940 | 87.106 | 94.679 | 61.537 | 0.00 | 0.00 |
| ATOM 29075 | 3HD1 | LEU | 1940 | 88.120 | 96.032 | 60.884 | 0.00 | 0.00 |
| ATOM 29076 | CD2  | LEU | 1940 | 85.903 | 97.315 | 59.710 | 0.00 | 0.00 |
| ATOM 29077 | 1HD2 | LEU | 1940 | 86.104 | 97.968 | 60.560 | 0.00 | 0.00 |
| ATOM 29078 | 2HD2 | LEU | 1940 | 86.854 | 97.585 | 59.249 | 0.00 | 0.00 |
| ATOM 29079 | 3HD2 | LEU | 1940 | 84.962 | 97.506 | 59.195 | 0.00 | 0.00 |
| ATOM 29080 | C    | LEU | 1940 | 85.572 | 93.996 | 56.650 | 0.00 | 0.00 |
| ATOM 29081 | O    | LEU | 1940 | 85.670 | 92.797 | 56.742 | 0.00 | 0.00 |
| ATOM 29082 | N    | GLY | 1941 | 85.858 | 94.611 | 55.525 | 0.00 | 0.00 |
| ATOM 29083 | H    | GLY | 1941 | 85.731 | 95.611 | 55.470 | 0.00 | 0.00 |
| ATOM 29084 | CA   | GLY | 1941 | 86.365 | 94.016 | 54.251 | 0.00 | 0.00 |
| ATOM 29085 | HA2  | GLY | 1941 | 86.147 | 92.948 | 54.245 | 0.00 | 0.00 |
| ATOM 29086 | HA3  | GLY | 1941 | 85.879 | 94.463 | 53.384 | 0.00 | 0.00 |
| ATOM 29087 | C    | GLY | 1941 | 87.899 | 94.143 | 54.240 | 0.00 | 0.00 |

|      |       |     |     |      |        |        |        |      |      |
|------|-------|-----|-----|------|--------|--------|--------|------|------|
| ATOM | 29088 | O   | GLY | 1941 | 88.609 | 94.719 | 55.074 | 0.00 | 0.00 |
| ATOM | 29089 | N   | LYS | 1942 | 88.471 | 93.601 | 53.110 | 0.00 | 0.00 |
| ATOM | 29090 | H   | LYS | 1942 | 87.758 | 93.313 | 52.454 | 0.00 | 0.00 |
| ATOM | 29091 | CA  | LYS | 1942 | 89.852 | 93.671 | 52.663 | 0.00 | 0.00 |
| ATOM | 29092 | HA  | LYS | 1942 | 90.457 | 93.564 | 53.564 | 0.00 | 0.00 |
| ATOM | 29093 | CB  | LYS | 1942 | 90.202 | 92.552 | 51.655 | 0.00 | 0.00 |
| ATOM | 29094 | HB2 | LYS | 1942 | 89.831 | 91.629 | 52.101 | 0.00 | 0.00 |
| ATOM | 29095 | HB3 | LYS | 1942 | 89.683 | 92.723 | 50.712 | 0.00 | 0.00 |
| ATOM | 29096 | CG  | LYS | 1942 | 91.728 | 92.491 | 51.522 | 0.00 | 0.00 |
| ATOM | 29097 | HG2 | LYS | 1942 | 92.119 | 93.506 | 51.448 | 0.00 | 0.00 |
| ATOM | 29098 | HG3 | LYS | 1942 | 92.112 | 92.166 | 52.489 | 0.00 | 0.00 |
| ATOM | 29099 | CD  | LYS | 1942 | 92.155 | 91.651 | 50.324 | 0.00 | 0.00 |
| ATOM | 29100 | HD2 | LYS | 1942 | 91.706 | 92.015 | 49.400 | 0.00 | 0.00 |
| ATOM | 29101 | HD3 | LYS | 1942 | 93.230 | 91.660 | 50.143 | 0.00 | 0.00 |
| ATOM | 29102 | CE  | LYS | 1942 | 91.771 | 90.197 | 50.634 | 0.00 | 0.00 |
| ATOM | 29103 | HE2 | LYS | 1942 | 92.300 | 89.808 | 51.504 | 0.00 | 0.00 |
| ATOM | 29104 | HE3 | LYS | 1942 | 90.724 | 90.216 | 50.934 | 0.00 | 0.00 |
| ATOM | 29105 | NZ  | LYS | 1942 | 92.077 | 89.291 | 49.463 | 0.00 | 0.00 |
| ATOM | 29106 | HZ1 | LYS | 1942 | 91.544 | 89.552 | 48.646 | 0.00 | 0.00 |
| ATOM | 29107 | HZ2 | LYS | 1942 | 93.063 | 89.397 | 49.271 | 0.00 | 0.00 |
| ATOM | 29108 | HZ3 | LYS | 1942 | 91.938 | 88.301 | 49.606 | 0.00 | 0.00 |
| ATOM | 29109 | C   | LYS | 1942 | 90.025 | 95.053 | 52.034 | 0.00 | 0.00 |
| ATOM | 29110 | O   | LYS | 1942 | 89.771 | 95.247 | 50.880 | 0.00 | 0.00 |
| ATOM | 29111 | N   | GLY | 1943 | 90.489 | 96.082 | 52.712 | 0.00 | 0.00 |
| ATOM | 29112 | H   | GLY | 1943 | 90.717 | 95.976 | 53.690 | 0.00 | 0.00 |
| ATOM | 29113 | CA  | GLY | 1943 | 90.793 | 97.478 | 52.188 | 0.00 | 0.00 |

|      |       |      |     |      |        |        |        |      |      |
|------|-------|------|-----|------|--------|--------|--------|------|------|
| ATOM | 29114 | HA2  | GLY | 1943 | 89.965 | 97.813 | 51.562 | 0.00 | 0.00 |
| ATOM | 29115 | HA3  | GLY | 1943 | 90.908 | 98.239 | 52.959 | 0.00 | 0.00 |
| ATOM | 29116 | C    | GLY | 1943 | 92.042 | 97.595 | 51.316 | 0.00 | 0.00 |
| ATOM | 29117 | O    | GLY | 1943 | 92.364 | 98.707 | 50.822 | 0.00 | 0.00 |
| ATOM | 29118 | N    | ASN | 1944 | 92.717 | 96.458 | 51.205 | 0.00 | 0.00 |
| ATOM | 29119 | H    | ASN | 1944 | 92.345 | 95.649 | 51.681 | 0.00 | 0.00 |
| ATOM | 29120 | CA   | ASN | 1944 | 94.155 | 96.425 | 50.816 | 0.00 | 0.00 |
| ATOM | 29121 | HA   | ASN | 1944 | 94.536 | 97.445 | 50.767 | 0.00 | 0.00 |
| ATOM | 29122 | CB   | ASN | 1944 | 94.915 | 95.663 | 51.867 | 0.00 | 0.00 |
| ATOM | 29123 | HB2  | ASN | 1944 | 94.520 | 95.824 | 52.870 | 0.00 | 0.00 |
| ATOM | 29124 | HB3  | ASN | 1944 | 94.857 | 94.610 | 51.592 | 0.00 | 0.00 |
| ATOM | 29125 | CG   | ASN | 1944 | 96.396 | 96.108 | 51.823 | 0.00 | 0.00 |
| ATOM | 29126 | OD1  | ASN | 1944 | 96.799 | 97.005 | 52.567 | 0.00 | 0.00 |
| ATOM | 29127 | ND2  | ASN | 1944 | 97.208 | 95.720 | 50.855 | 0.00 | 0.00 |
| ATOM | 29128 | 1HD2 | ASN | 1944 | 98.172 | 95.991 | 50.991 | 0.00 | 0.00 |
| ATOM | 29129 | 2HD2 | ASN | 1944 | 96.859 | 95.052 | 50.183 | 0.00 | 0.00 |
| ATOM | 29130 | C    | ASN | 1944 | 94.278 | 95.995 | 49.321 | 0.00 | 0.00 |
| ATOM | 29131 | O    | ASN | 1944 | 94.894 | 94.933 | 49.125 | 0.00 | 0.00 |
| ATOM | 29132 | N    | VAL | 1945 | 93.710 | 96.744 | 48.436 | 0.00 | 0.00 |
| ATOM | 29133 | H    | VAL | 1945 | 93.021 | 97.420 | 48.733 | 0.00 | 0.00 |
| ATOM | 29134 | CA   | VAL | 1945 | 93.564 | 96.470 | 47.027 | 0.00 | 0.00 |
| ATOM | 29135 | HA   | VAL | 1945 | 94.387 | 95.808 | 46.759 | 0.00 | 0.00 |
| ATOM | 29136 | CB   | VAL | 1945 | 92.276 | 95.813 | 46.603 | 0.00 | 0.00 |
| ATOM | 29137 | HB   | VAL | 1945 | 91.625 | 96.578 | 46.180 | 0.00 | 0.00 |
| ATOM | 29138 | CG1  | VAL | 1945 | 92.590 | 94.944 | 45.353 | 0.00 | 0.00 |
| ATOM | 29139 | 1HG1 | VAL | 1945 | 93.057 | 95.606 | 44.624 | 0.00 | 0.00 |

|      |       |      |     |      |        |         |        |      |      |
|------|-------|------|-----|------|--------|---------|--------|------|------|
| ATOM | 29140 | 2HG1 | VAL | 1945 | 93.368 | 94.223  | 45.603 | 0.00 | 0.00 |
| ATOM | 29141 | 3HG1 | VAL | 1945 | 91.813 | 94.363  | 44.856 | 0.00 | 0.00 |
| ATOM | 29142 | CG2  | VAL | 1945 | 91.526 | 94.981  | 47.589 | 0.00 | 0.00 |
| ATOM | 29143 | 1HG2 | VAL | 1945 | 92.208 | 94.192  | 47.903 | 0.00 | 0.00 |
| ATOM | 29144 | 2HG2 | VAL | 1945 | 91.296 | 95.585  | 48.467 | 0.00 | 0.00 |
| ATOM | 29145 | 3HG2 | VAL | 1945 | 90.611 | 94.529  | 47.205 | 0.00 | 0.00 |
| ATOM | 29146 | C    | VAL | 1945 | 93.687 | 97.799  | 46.364 | 0.00 | 0.00 |
| ATOM | 29147 | O    | VAL | 1945 | 92.924 | 98.735  | 46.525 | 0.00 | 0.00 |
| ATOM | 29148 | N    | SER | 1946 | 94.659 | 97.890  | 45.441 | 0.00 | 0.00 |
| ATOM | 29149 | H    | SER | 1946 | 95.222 | 97.069  | 45.274 | 0.00 | 0.00 |
| ATOM | 29150 | CA   | SER | 1946 | 95.030 | 99.103  | 44.649 | 0.00 | 0.00 |
| ATOM | 29151 | HA   | SER | 1946 | 94.901 | 100.040 | 45.190 | 0.00 | 0.00 |
| ATOM | 29152 | CB   | SER | 1946 | 96.474 | 99.022  | 44.094 | 0.00 | 0.00 |
| ATOM | 29153 | HB2  | SER | 1946 | 96.622 | 98.058  | 43.607 | 0.00 | 0.00 |
| ATOM | 29154 | HB3  | SER | 1946 | 96.657 | 99.849  | 43.409 | 0.00 | 0.00 |
| ATOM | 29155 | OG   | SER | 1946 | 97.300 | 99.211  | 45.260 | 0.00 | 0.00 |
| ATOM | 29156 | HG   | SER | 1946 | 97.210 | 98.451  | 45.840 | 0.00 | 0.00 |
| ATOM | 29157 | C    | SER | 1946 | 94.003 | 99.270  | 43.472 | 0.00 | 0.00 |
| ATOM | 29158 | O    | SER | 1946 | 94.408 | 99.824  | 42.444 | 0.00 | 0.00 |
| ATOM | 29159 | N    | GLN | 1947 | 92.808 | 98.808  | 43.567 | 0.00 | 0.00 |
| ATOM | 29160 | H    | GLN | 1947 | 92.620 | 98.265  | 44.398 | 0.00 | 0.00 |
| ATOM | 29161 | CA   | GLN | 1947 | 91.751 | 98.786  | 42.538 | 0.00 | 0.00 |
| ATOM | 29162 | HA   | GLN | 1947 | 92.004 | 99.340  | 41.634 | 0.00 | 0.00 |
| ATOM | 29163 | CB   | GLN | 1947 | 91.735 | 97.270  | 42.068 | 0.00 | 0.00 |
| ATOM | 29164 | HB2  | GLN | 1947 | 92.661 | 97.072  | 41.529 | 0.00 | 0.00 |
| ATOM | 29165 | HB3  | GLN | 1947 | 91.699 | 96.532  | 42.870 | 0.00 | 0.00 |

|            |      |     |      |        |         |        |      |      |
|------------|------|-----|------|--------|---------|--------|------|------|
| ATOM 29166 | CG   | GLN | 1947 | 90.541 | 96.933  | 41.201 | 0.00 | 0.00 |
| ATOM 29167 | HG2  | GLN | 1947 | 90.669 | 95.984  | 40.682 | 0.00 | 0.00 |
| ATOM 29168 | HG3  | GLN | 1947 | 89.643 | 96.719  | 41.781 | 0.00 | 0.00 |
| ATOM 29169 | CD   | GLN | 1947 | 90.359 | 97.987  | 40.156 | 0.00 | 0.00 |
| ATOM 29170 | OE1  | GLN | 1947 | 89.361 | 98.677  | 40.191 | 0.00 | 0.00 |
| ATOM 29171 | NE2  | GLN | 1947 | 91.316 | 98.193  | 39.288 | 0.00 | 0.00 |
| ATOM 29172 | 1HE2 | GLN | 1947 | 91.163 | 98.900  | 38.583 | 0.00 | 0.00 |
| ATOM 29173 | 2HE2 | GLN | 1947 | 92.123 | 97.585  | 39.286 | 0.00 | 0.00 |
| ATOM 29174 | C    | GLN | 1947 | 90.469 | 99.283  | 43.147 | 0.00 | 0.00 |
| ATOM 29175 | O    | GLN | 1947 | 89.849 | 98.557  | 44.008 | 0.00 | 0.00 |
| ATOM 29176 | N    | PRO | 1948 | 90.069 | 100.500 | 42.755 | 0.00 | 0.00 |
| ATOM 29177 | CD   | PRO | 1948 | 90.695 | 101.324 | 41.781 | 0.00 | 0.00 |
| ATOM 29178 | HD2  | PRO | 1948 | 91.784 | 101.367 | 41.795 | 0.00 | 0.00 |
| ATOM 29179 | HD3  | PRO | 1948 | 90.326 | 101.281 | 40.756 | 0.00 | 0.00 |
| ATOM 29180 | CG   | PRO | 1948 | 90.235 | 102.785 | 42.316 | 0.00 | 0.00 |
| ATOM 29181 | HG2  | PRO | 1948 | 90.807 | 102.853 | 43.241 | 0.00 | 0.00 |
| ATOM 29182 | HG3  | PRO | 1948 | 90.351 | 103.579 | 41.579 | 0.00 | 0.00 |
| ATOM 29183 | CB   | PRO | 1948 | 88.809 | 102.467 | 42.689 | 0.00 | 0.00 |
| ATOM 29184 | HB2  | PRO | 1948 | 88.560 | 103.199 | 43.456 | 0.00 | 0.00 |
| ATOM 29185 | HB3  | PRO | 1948 | 88.120 | 102.427 | 41.845 | 0.00 | 0.00 |
| ATOM 29186 | CA   | PRO | 1948 | 88.909 | 101.131 | 43.424 | 0.00 | 0.00 |
| ATOM 29187 | HA   | PRO | 1948 | 89.094 | 101.338 | 44.478 | 0.00 | 0.00 |
| ATOM 29188 | C    | PRO | 1948 | 87.587 | 100.482 | 43.300 | 0.00 | 0.00 |
| ATOM 29189 | O    | PRO | 1948 | 86.821 | 100.549 | 44.226 | 0.00 | 0.00 |
| ATOM 29190 | N    | ASP | 1949 | 87.375 | 99.806  | 42.182 | 0.00 | 0.00 |
| ATOM 29191 | H    | ASP | 1949 | 88.178 | 99.698  | 41.579 | 0.00 | 0.00 |

|      |       |     |     |      |        |         |        |      |      |
|------|-------|-----|-----|------|--------|---------|--------|------|------|
| ATOM | 29192 | CA  | ASP | 1949 | 86.058 | 99.076  | 41.989 | 0.00 | 0.00 |
| ATOM | 29193 | HA  | ASP | 1949 | 85.201 | 99.745  | 42.076 | 0.00 | 0.00 |
| ATOM | 29194 | CB  | ASP | 1949 | 86.027 | 98.501  | 40.608 | 0.00 | 0.00 |
| ATOM | 29195 | HB2 | ASP | 1949 | 86.412 | 99.309  | 39.985 | 0.00 | 0.00 |
| ATOM | 29196 | HB3 | ASP | 1949 | 86.650 | 97.607  | 40.572 | 0.00 | 0.00 |
| ATOM | 29197 | CG  | ASP | 1949 | 84.661 | 98.110  | 40.081 | 0.00 | 0.00 |
| ATOM | 29198 | OD1 | ASP | 1949 | 84.178 | 97.013  | 40.431 | 0.00 | 0.00 |
| ATOM | 29199 | OD2 | ASP | 1949 | 84.135 | 98.952  | 39.369 | 0.00 | 0.00 |
| ATOM | 29200 | C   | ASP | 1949 | 85.880 | 97.918  | 42.914 | 0.00 | 0.00 |
| ATOM | 29201 | O   | ASP | 1949 | 84.821 | 97.776  | 43.522 | 0.00 | 0.00 |
| ATOM | 29202 | N   | ALA | 1950 | 86.940 | 97.209  | 43.269 | 0.00 | 0.00 |
| ATOM | 29203 | H   | ALA | 1950 | 87.739 | 97.433  | 42.693 | 0.00 | 0.00 |
| ATOM | 29204 | CA  | ALA | 1950 | 86.932 | 96.061  | 44.222 | 0.00 | 0.00 |
| ATOM | 29205 | HA  | ALA | 1950 | 86.184 | 95.338  | 43.897 | 0.00 | 0.00 |
| ATOM | 29206 | CB  | ALA | 1950 | 88.268 | 95.332  | 44.155 | 0.00 | 0.00 |
| ATOM | 29207 | HB1 | ALA | 1950 | 89.159 | 95.947  | 44.284 | 0.00 | 0.00 |
| ATOM | 29208 | HB2 | ALA | 1950 | 88.304 | 94.669  | 45.018 | 0.00 | 0.00 |
| ATOM | 29209 | HB3 | ALA | 1950 | 88.323 | 94.777  | 43.219 | 0.00 | 0.00 |
| ATOM | 29210 | C   | ALA | 1950 | 86.548 | 96.501  | 45.629 | 0.00 | 0.00 |
| ATOM | 29211 | O   | ALA | 1950 | 85.898 | 95.774  | 46.345 | 0.00 | 0.00 |
| ATOM | 29212 | N   | LEU | 1951 | 87.080 | 97.652  | 46.076 | 0.00 | 0.00 |
| ATOM | 29213 | H   | LEU | 1951 | 87.561 | 98.188  | 45.367 | 0.00 | 0.00 |
| ATOM | 29214 | CA  | LEU | 1951 | 86.759 | 98.190  | 47.357 | 0.00 | 0.00 |
| ATOM | 29215 | HA  | LEU | 1951 | 86.757 | 97.386  | 48.093 | 0.00 | 0.00 |
| ATOM | 29216 | CB  | LEU | 1951 | 87.794 | 99.221  | 47.754 | 0.00 | 0.00 |
| ATOM | 29217 | HB2 | LEU | 1951 | 87.783 | 100.036 | 47.031 | 0.00 | 0.00 |

|      |       |      |     |      |        |         |        |      |      |
|------|-------|------|-----|------|--------|---------|--------|------|------|
| ATOM | 29218 | HB3  | LEU | 1951 | 87.528 | 99.587  | 48.746 | 0.00 | 0.00 |
| ATOM | 29219 | CG   | LEU | 1951 | 89.354 | 98.742  | 47.877 | 0.00 | 0.00 |
| ATOM | 29220 | HG   | LEU | 1951 | 89.694 | 98.577  | 46.855 | 0.00 | 0.00 |
| ATOM | 29221 | CD1  | LEU | 1951 | 90.202 | 99.802  | 48.532 | 0.00 | 0.00 |
| ATOM | 29222 | 1HD1 | LEU | 1951 | 89.834 | 99.898  | 49.554 | 0.00 | 0.00 |
| ATOM | 29223 | 2HD1 | LEU | 1951 | 91.263 | 99.577  | 48.428 | 0.00 | 0.00 |
| ATOM | 29224 | 3HD1 | LEU | 1951 | 90.069 | 100.734 | 47.984 | 0.00 | 0.00 |
| ATOM | 29225 | CD2  | LEU | 1951 | 89.433 | 97.481  | 48.762 | 0.00 | 0.00 |
| ATOM | 29226 | 1HD2 | LEU | 1951 | 89.230 | 96.507  | 48.317 | 0.00 | 0.00 |
| ATOM | 29227 | 2HD2 | LEU | 1951 | 90.437 | 97.392  | 49.177 | 0.00 | 0.00 |
| ATOM | 29228 | 3HD2 | LEU | 1951 | 88.722 | 97.687  | 49.562 | 0.00 | 0.00 |
| ATOM | 29229 | C    | LEU | 1951 | 85.316 | 98.790  | 47.435 | 0.00 | 0.00 |
| ATOM | 29230 | O    | LEU | 1951 | 84.650 | 98.490  | 48.447 | 0.00 | 0.00 |
| ATOM | 29231 | N    | ARG | 1952 | 84.733 | 99.363  | 46.337 | 0.00 | 0.00 |
| ATOM | 29232 | H    | ARG | 1952 | 85.395 | 99.492  | 45.585 | 0.00 | 0.00 |
| ATOM | 29233 | CA   | ARG | 1952 | 83.389 | 99.797  | 46.174 | 0.00 | 0.00 |
| ATOM | 29234 | HA   | ARG | 1952 | 83.254 | 100.404 | 47.069 | 0.00 | 0.00 |
| ATOM | 29235 | CB   | ARG | 1952 | 83.116 | 100.660 | 44.919 | 0.00 | 0.00 |
| ATOM | 29236 | HB2  | ARG | 1952 | 83.681 | 100.278 | 44.068 | 0.00 | 0.00 |
| ATOM | 29237 | HB3  | ARG | 1952 | 82.062 | 100.639 | 44.641 | 0.00 | 0.00 |
| ATOM | 29238 | CG   | ARG | 1952 | 83.569 | 102.096 | 45.141 | 0.00 | 0.00 |
| ATOM | 29239 | HG2  | ARG | 1952 | 83.272 | 102.392 | 46.147 | 0.00 | 0.00 |
| ATOM | 29240 | HG3  | ARG | 1952 | 84.651 | 102.175 | 45.042 | 0.00 | 0.00 |
| ATOM | 29241 | CD   | ARG | 1952 | 83.021 | 103.191 | 44.175 | 0.00 | 0.00 |
| ATOM | 29242 | HD2  | ARG | 1952 | 81.960 | 102.957 | 44.095 | 0.00 | 0.00 |
| ATOM | 29243 | HD3  | ARG | 1952 | 83.228 | 104.139 | 44.672 | 0.00 | 0.00 |



|      |       |      |     |      |        |         |        |      |      |
|------|-------|------|-----|------|--------|---------|--------|------|------|
| ATOM | 29244 | NE   | ARG | 1952 | 83.549 | 102.995 | 42.895 | 0.00 | 0.00 |
| ATOM | 29245 | HE   | ARG | 1952 | 83.017 | 102.374 | 42.303 | 0.00 | 0.00 |
| ATOM | 29246 | CZ   | ARG | 1952 | 84.586 | 103.574 | 42.361 | 0.00 | 0.00 |
| ATOM | 29247 | NH1  | ARG | 1952 | 85.209 | 104.611 | 42.838 | 0.00 | 0.00 |
| ATOM | 29248 | 1HH1 | ARG | 1952 | 85.828 | 105.135 | 42.235 | 0.00 | 0.00 |
| ATOM | 29249 | 2HH1 | ARG | 1952 | 84.784 | 105.200 | 43.540 | 0.00 | 0.00 |
| ATOM | 29250 | NH2  | ARG | 1952 | 85.217 | 103.187 | 41.271 | 0.00 | 0.00 |
| ATOM | 29251 | 1HH2 | ARG | 1952 | 86.124 | 103.597 | 41.100 | 0.00 | 0.00 |
| ATOM | 29252 | 2HH2 | ARG | 1952 | 84.904 | 102.373 | 40.761 | 0.00 | 0.00 |
| ATOM | 29253 | C    | ARG | 1952 | 82.430 | 98.659  | 46.235 | 0.00 | 0.00 |
| ATOM | 29254 | O    | ARG | 1952 | 81.407 | 98.714  | 46.957 | 0.00 | 0.00 |
| ATOM | 29255 | N    | GLU | 1953 | 82.785 | 97.536  | 45.583 | 0.00 | 0.00 |
| ATOM | 29256 | H    | GLU | 1953 | 83.632 | 97.511  | 45.034 | 0.00 | 0.00 |
| ATOM | 29257 | CA   | GLU | 1953 | 81.984 | 96.290  | 45.519 | 0.00 | 0.00 |
| ATOM | 29258 | HA   | GLU | 1953 | 80.991 | 96.568  | 45.166 | 0.00 | 0.00 |
| ATOM | 29259 | CB   | GLU | 1953 | 82.686 | 95.238  | 44.680 | 0.00 | 0.00 |
| ATOM | 29260 | HB2  | GLU | 1953 | 82.849 | 95.664  | 43.690 | 0.00 | 0.00 |
| ATOM | 29261 | HB3  | GLU | 1953 | 83.619 | 94.762  | 44.982 | 0.00 | 0.00 |
| ATOM | 29262 | CG   | GLU | 1953 | 81.688 | 94.088  | 44.482 | 0.00 | 0.00 |
| ATOM | 29263 | HG2  | GLU | 1953 | 82.365 | 93.238  | 44.403 | 0.00 | 0.00 |
| ATOM | 29264 | HG3  | GLU | 1953 | 81.062 | 93.861  | 45.345 | 0.00 | 0.00 |
| ATOM | 29265 | CD   | GLU | 1953 | 80.832 | 94.240  | 43.152 | 0.00 | 0.00 |
| ATOM | 29266 | OE1  | GLU | 1953 | 81.227 | 93.590  | 42.173 | 0.00 | 0.00 |
| ATOM | 29267 | OE2  | GLU | 1953 | 79.813 | 94.932  | 43.100 | 0.00 | 0.00 |
| ATOM | 29268 | C    | GLU | 1953 | 81.866 | 95.787  | 46.946 | 0.00 | 0.00 |
| ATOM | 29269 | O    | GLU | 1953 | 80.736 | 95.349  | 47.302 | 0.00 | 0.00 |

|      |       |      |     |      |        |         |        |      |      |
|------|-------|------|-----|------|--------|---------|--------|------|------|
| ATOM | 29270 | N    | GLN | 1954 | 82.900 | 95.814  | 47.788 | 0.00 | 0.00 |
| ATOM | 29271 | H    | GLN | 1954 | 83.713 | 96.280  | 47.411 | 0.00 | 0.00 |
| ATOM | 29272 | CA   | GLN | 1954 | 82.796 | 95.280  | 49.115 | 0.00 | 0.00 |
| ATOM | 29273 | HA   | GLN | 1954 | 82.463 | 94.246  | 49.031 | 0.00 | 0.00 |
| ATOM | 29274 | CB   | GLN | 1954 | 84.200 | 95.236  | 49.786 | 0.00 | 0.00 |
| ATOM | 29275 | HB2  | GLN | 1954 | 84.638 | 96.217  | 49.971 | 0.00 | 0.00 |
| ATOM | 29276 | HB3  | GLN | 1954 | 84.075 | 95.016  | 50.846 | 0.00 | 0.00 |
| ATOM | 29277 | CG   | GLN | 1954 | 85.107 | 94.165  | 49.239 | 0.00 | 0.00 |
| ATOM | 29278 | HG2  | GLN | 1954 | 84.689 | 93.187  | 49.479 | 0.00 | 0.00 |
| ATOM | 29279 | HG3  | GLN | 1954 | 85.100 | 94.194  | 48.149 | 0.00 | 0.00 |
| ATOM | 29280 | CD   | GLN | 1954 | 86.510 | 94.393  | 49.832 | 0.00 | 0.00 |
| ATOM | 29281 | OE1  | GLN | 1954 | 86.673 | 94.428  | 51.037 | 0.00 | 0.00 |
| ATOM | 29282 | NE2  | GLN | 1954 | 87.534 | 94.766  | 49.081 | 0.00 | 0.00 |
| ATOM | 29283 | 1HE2 | GLN | 1954 | 88.414 | 95.032  | 49.501 | 0.00 | 0.00 |
| ATOM | 29284 | 2HE2 | GLN | 1954 | 87.336 | 94.958  | 48.110 | 0.00 | 0.00 |
| ATOM | 29285 | C    | GLN | 1954 | 81.789 | 96.025  | 49.962 | 0.00 | 0.00 |
| ATOM | 29286 | O    | GLN | 1954 | 80.882 | 95.405  | 50.500 | 0.00 | 0.00 |
| ATOM | 29287 | N    | VAL | 1955 | 81.875 | 97.355  | 50.001 | 0.00 | 0.00 |
| ATOM | 29288 | H    | VAL | 1955 | 82.442 | 97.815  | 49.303 | 0.00 | 0.00 |
| ATOM | 29289 | CA   | VAL | 1955 | 81.074 | 98.194  | 50.852 | 0.00 | 0.00 |
| ATOM | 29290 | HA   | VAL | 1955 | 81.187 | 97.850  | 51.880 | 0.00 | 0.00 |
| ATOM | 29291 | CB   | VAL | 1955 | 81.435 | 99.749  | 50.636 | 0.00 | 0.00 |
| ATOM | 29292 | HB   | VAL | 1955 | 81.360 | 100.033 | 49.587 | 0.00 | 0.00 |
| ATOM | 29293 | CG1  | VAL | 1955 | 80.478 | 100.699 | 51.398 | 0.00 | 0.00 |
| ATOM | 29294 | 1HG1 | VAL | 1955 | 80.518 | 100.549 | 52.477 | 0.00 | 0.00 |
| ATOM | 29295 | 2HG1 | VAL | 1955 | 80.755 | 101.746 | 51.277 | 0.00 | 0.00 |

|      |       |      |     |      |        |         |        |      |      |
|------|-------|------|-----|------|--------|---------|--------|------|------|
| ATOM | 29296 | 3HG1 | VAL | 1955 | 79.452 | 100.677 | 51.029 | 0.00 | 0.00 |
| ATOM | 29297 | CG2  | VAL | 1955 | 82.830 | 99.966  | 51.141 | 0.00 | 0.00 |
| ATOM | 29298 | 1HG2 | VAL | 1955 | 83.077 | 101.028 | 51.113 | 0.00 | 0.00 |
| ATOM | 29299 | 2HG2 | VAL | 1955 | 82.957 | 99.669  | 52.182 | 0.00 | 0.00 |
| ATOM | 29300 | 3HG2 | VAL | 1955 | 83.505 | 99.426  | 50.477 | 0.00 | 0.00 |
| ATOM | 29301 | C    | VAL | 1955 | 79.626 | 98.036  | 50.469 | 0.00 | 0.00 |
| ATOM | 29302 | O    | VAL | 1955 | 78.858 | 97.777  | 51.364 | 0.00 | 0.00 |
| ATOM | 29303 | N    | ALA | 1956 | 79.287 | 98.097  | 49.164 | 0.00 | 0.00 |
| ATOM | 29304 | H    | ALA | 1956 | 80.077 | 98.185  | 48.540 | 0.00 | 0.00 |
| ATOM | 29305 | CA   | ALA | 1956 | 77.977 | 97.873  | 48.576 | 0.00 | 0.00 |
| ATOM | 29306 | HA   | ALA | 1956 | 77.196 | 98.416  | 49.108 | 0.00 | 0.00 |
| ATOM | 29307 | CB   | ALA | 1956 | 78.000 | 98.230  | 47.056 | 0.00 | 0.00 |
| ATOM | 29308 | HB1  | ALA | 1956 | 78.377 | 99.237  | 46.873 | 0.00 | 0.00 |
| ATOM | 29309 | HB2  | ALA | 1956 | 78.593 | 97.480  | 46.533 | 0.00 | 0.00 |
| ATOM | 29310 | HB3  | ALA | 1956 | 76.962 | 98.266  | 46.727 | 0.00 | 0.00 |
| ATOM | 29311 | C    | ALA | 1956 | 77.506 | 96.390  | 48.692 | 0.00 | 0.00 |
| ATOM | 29312 | O    | ALA | 1956 | 76.321 | 96.191  | 48.548 | 0.00 | 0.00 |
| ATOM | 29313 | N    | ALA | 1957 | 78.363 | 95.364  | 48.953 | 0.00 | 0.00 |
| ATOM | 29314 | H    | ALA | 1957 | 79.358 | 95.478  | 49.080 | 0.00 | 0.00 |
| ATOM | 29315 | CA   | ALA | 1957 | 77.945 | 94.028  | 49.313 | 0.00 | 0.00 |
| ATOM | 29316 | HA   | ALA | 1957 | 77.132 | 93.685  | 48.674 | 0.00 | 0.00 |
| ATOM | 29317 | CB   | ALA | 1957 | 78.986 | 92.950  | 48.979 | 0.00 | 0.00 |
| ATOM | 29318 | HB1  | ALA | 1957 | 78.626 | 91.934  | 49.142 | 0.00 | 0.00 |
| ATOM | 29319 | HB2  | ALA | 1957 | 79.187 | 92.884  | 47.910 | 0.00 | 0.00 |
| ATOM | 29320 | HB3  | ALA | 1957 | 79.876 | 93.148  | 49.576 | 0.00 | 0.00 |
| ATOM | 29321 | C    | ALA | 1957 | 77.481 | 93.977  | 50.791 | 0.00 | 0.00 |

|      |       |      |     |      |        |        |        |      |      |
|------|-------|------|-----|------|--------|--------|--------|------|------|
| ATOM | 29322 | O    | ALA | 1957 | 76.582 | 93.205 | 51.123 | 0.00 | 0.00 |
| ATOM | 29323 | N    | GLY | 1958 | 78.088 | 94.839 | 51.689 | 0.00 | 0.00 |
| ATOM | 29324 | H    | GLY | 1958 | 78.886 | 95.408 | 51.444 | 0.00 | 0.00 |
| ATOM | 29325 | CA   | GLY | 1958 | 77.614 | 94.971 | 53.096 | 0.00 | 0.00 |
| ATOM | 29326 | HA2  | GLY | 1958 | 76.734 | 95.605 | 52.988 | 0.00 | 0.00 |
| ATOM | 29327 | HA3  | GLY | 1958 | 77.287 | 93.971 | 53.382 | 0.00 | 0.00 |
| ATOM | 29328 | C    | GLY | 1958 | 78.529 | 95.542 | 54.145 | 0.00 | 0.00 |
| ATOM | 29329 | O    | GLY | 1958 | 78.018 | 95.860 | 55.231 | 0.00 | 0.00 |
| ATOM | 29330 | N    | VAL | 1959 | 79.818 | 95.601 | 53.780 | 0.00 | 0.00 |
| ATOM | 29331 | H    | VAL | 1959 | 80.043 | 95.446 | 52.808 | 0.00 | 0.00 |
| ATOM | 29332 | CA   | VAL | 1959 | 80.957 | 95.887 | 54.810 | 0.00 | 0.00 |
| ATOM | 29333 | HA   | VAL | 1959 | 80.617 | 95.349 | 55.695 | 0.00 | 0.00 |
| ATOM | 29334 | CB   | VAL | 1959 | 82.386 | 95.369 | 54.494 | 0.00 | 0.00 |
| ATOM | 29335 | HB   | VAL | 1959 | 83.040 | 95.674 | 55.311 | 0.00 | 0.00 |
| ATOM | 29336 | CG1  | VAL | 1959 | 82.325 | 93.851 | 54.259 | 0.00 | 0.00 |
| ATOM | 29337 | 1HG1 | VAL | 1959 | 81.971 | 93.448 | 55.208 | 0.00 | 0.00 |
| ATOM | 29338 | 2HG1 | VAL | 1959 | 81.715 | 93.628 | 53.384 | 0.00 | 0.00 |
| ATOM | 29339 | 3HG1 | VAL | 1959 | 83.341 | 93.477 | 54.132 | 0.00 | 0.00 |
| ATOM | 29340 | CG2  | VAL | 1959 | 83.058 | 96.065 | 53.315 | 0.00 | 0.00 |
| ATOM | 29341 | 1HG2 | VAL | 1959 | 84.097 | 95.767 | 53.179 | 0.00 | 0.00 |
| ATOM | 29342 | 2HG2 | VAL | 1959 | 82.502 | 95.850 | 52.403 | 0.00 | 0.00 |
| ATOM | 29343 | 3HG2 | VAL | 1959 | 82.981 | 97.130 | 53.533 | 0.00 | 0.00 |
| ATOM | 29344 | C    | VAL | 1959 | 80.857 | 97.342 | 55.318 | 0.00 | 0.00 |
| ATOM | 29345 | O    | VAL | 1959 | 80.798 | 98.275 | 54.555 | 0.00 | 0.00 |
| ATOM | 29346 | N    | ILE | 1960 | 80.795 | 97.573 | 56.666 | 0.00 | 0.00 |
| ATOM | 29347 | H    | ILE | 1960 | 80.683 | 96.766 | 57.264 | 0.00 | 0.00 |

|            |      |     |      |        |         |        |      |      |
|------------|------|-----|------|--------|---------|--------|------|------|
| ATOM 29348 | CA   | ILE | 1960 | 80.710 | 98.973  | 57.224 | 0.00 | 0.00 |
| ATOM 29349 | HA   | ILE | 1960 | 80.089 | 99.682  | 56.676 | 0.00 | 0.00 |
| ATOM 29350 | CB   | ILE | 1960 | 80.159 | 99.106  | 58.628 | 0.00 | 0.00 |
| ATOM 29351 | HB   | ILE | 1960 | 80.308 | 100.144 | 58.926 | 0.00 | 0.00 |
| ATOM 29352 | CG2  | ILE | 1960 | 78.633 | 98.827  | 58.425 | 0.00 | 0.00 |
| ATOM 29353 | 1HG2 | ILE | 1960 | 78.169 | 99.412  | 57.631 | 0.00 | 0.00 |
| ATOM 29354 | 2HG2 | ILE | 1960 | 78.403 | 97.774  | 58.263 | 0.00 | 0.00 |
| ATOM 29355 | 3HG2 | ILE | 1960 | 78.144 | 99.055  | 59.372 | 0.00 | 0.00 |
| ATOM 29356 | CG1  | ILE | 1960 | 80.833 | 98.196  | 59.650 | 0.00 | 0.00 |
| ATOM 29357 | 2HG1 | ILE | 1960 | 80.659 | 97.174  | 59.312 | 0.00 | 0.00 |
| ATOM 29358 | 3HG1 | ILE | 1960 | 81.889 | 98.426  | 59.788 | 0.00 | 0.00 |
| ATOM 29359 | CD1  | ILE | 1960 | 80.315 | 98.318  | 61.025 | 0.00 | 0.00 |
| ATOM 29360 | 1HD1 | ILE | 1960 | 80.962 | 97.739  | 61.684 | 0.00 | 0.00 |
| ATOM 29361 | 2HD1 | ILE | 1960 | 80.258 | 99.343  | 61.391 | 0.00 | 0.00 |
| ATOM 29362 | 3HD1 | ILE | 1960 | 79.373 | 97.795  | 61.190 | 0.00 | 0.00 |
| ATOM 29363 | C    | ILE | 1960 | 82.144 | 99.549  | 57.175 | 0.00 | 0.00 |
| ATOM 29364 | O    | ILE | 1960 | 82.187 | 100.745 | 57.395 | 0.00 | 0.00 |
| ATOM 29365 | N    | GLY | 1961 | 83.242 | 98.778  | 57.223 | 0.00 | 0.00 |
| ATOM 29366 | H    | GLY | 1961 | 83.176 | 97.788  | 57.414 | 0.00 | 0.00 |
| ATOM 29367 | CA   | GLY | 1961 | 84.553 | 99.414  | 57.105 | 0.00 | 0.00 |
| ATOM 29368 | HA2  | GLY | 1961 | 84.558 | 100.400 | 56.640 | 0.00 | 0.00 |
| ATOM 29369 | HA3  | GLY | 1961 | 85.106 | 99.367  | 58.043 | 0.00 | 0.00 |
| ATOM 29370 | C    | GLY | 1961 | 85.396 | 98.586  | 56.215 | 0.00 | 0.00 |
| ATOM 29371 | O    | GLY | 1961 | 85.100 | 97.536  | 55.652 | 0.00 | 0.00 |
| ATOM 29372 | N    | LEU | 1962 | 86.609 | 99.156  | 56.022 | 0.00 | 0.00 |
| ATOM 29373 | H    | LEU | 1962 | 86.800 | 100.093 | 56.347 | 0.00 | 0.00 |

|            |      |     |      |        |         |        |      |      |
|------------|------|-----|------|--------|---------|--------|------|------|
| ATOM 29374 | CA   | LEU | 1962 | 87.714 | 98.490  | 55.315 | 0.00 | 0.00 |
| ATOM 29375 | HA   | LEU | 1962 | 87.469 | 97.440  | 55.157 | 0.00 | 0.00 |
| ATOM 29376 | CB   | LEU | 1962 | 87.919 | 99.082  | 53.917 | 0.00 | 0.00 |
| ATOM 29377 | HB2  | LEU | 1962 | 88.272 | 100.096 | 54.106 | 0.00 | 0.00 |
| ATOM 29378 | HB3  | LEU | 1962 | 88.873 | 98.696  | 53.557 | 0.00 | 0.00 |
| ATOM 29379 | CG   | LEU | 1962 | 86.786 | 98.942  | 52.865 | 0.00 | 0.00 |
| ATOM 29380 | HG   | LEU | 1962 | 85.838 | 99.308  | 53.260 | 0.00 | 0.00 |
| ATOM 29381 | CD1  | LEU | 1962 | 87.063 | 99.714  | 51.541 | 0.00 | 0.00 |
| ATOM 29382 | 1HD1 | LEU | 1962 | 86.247 | 99.406  | 50.887 | 0.00 | 0.00 |
| ATOM 29383 | 2HD1 | LEU | 1962 | 86.950 | 100.790 | 51.664 | 0.00 | 0.00 |
| ATOM 29384 | 3HD1 | LEU | 1962 | 88.037 | 99.409  | 51.158 | 0.00 | 0.00 |
| ATOM 29385 | CD2  | LEU | 1962 | 86.666 | 97.432  | 52.611 | 0.00 | 0.00 |
| ATOM 29386 | 1HD2 | LEU | 1962 | 86.349 | 96.999  | 53.559 | 0.00 | 0.00 |
| ATOM 29387 | 2HD2 | LEU | 1962 | 85.839 | 97.156  | 51.957 | 0.00 | 0.00 |
| ATOM 29388 | 3HD2 | LEU | 1962 | 87.601 | 97.007  | 52.246 | 0.00 | 0.00 |
| ATOM 29389 | C    | LEU | 1962 | 89.009 | 98.427  | 56.130 | 0.00 | 0.00 |
| ATOM 29390 | O    | LEU | 1962 | 89.388 | 99.424  | 56.737 | 0.00 | 0.00 |
| ATOM 29391 | N    | KCB | 1963 | 89.631 | 97.265  | 56.229 | 0.00 | 0.00 |
| ATOM 29392 | H    | KCB | 1963 | 89.302 | 96.420  | 55.784 | 0.00 | 0.00 |
| ATOM 29393 | CA   | KCB | 1963 | 90.931 | 97.167  | 56.910 | 0.00 | 0.00 |
| ATOM 29394 | HA   | KCB | 1963 | 91.121 | 98.033  | 57.545 | 0.00 | 0.00 |
| ATOM 29395 | CB   | KCB | 1963 | 90.955 | 95.931  | 57.869 | 0.00 | 0.00 |
| ATOM 29396 | HB2  | KCB | 1963 | 90.068 | 95.858  | 58.499 | 0.00 | 0.00 |
| ATOM 29397 | HB3  | KCB | 1963 | 90.838 | 95.037  | 57.257 | 0.00 | 0.00 |
| ATOM 29398 | CG   | KCB | 1963 | 92.140 | 95.714  | 58.786 | 0.00 | 0.00 |
| ATOM 29399 | HG2  | KCB | 1963 | 93.032 | 95.454  | 58.215 | 0.00 | 0.00 |

|            |          |      |        |         |        |      |      |
|------------|----------|------|--------|---------|--------|------|------|
| ATOM 29400 | HG3 KCB  | 1963 | 92.244 | 96.610  | 59.398 | 0.00 | 0.00 |
| ATOM 29401 | CD KCB   | 1963 | 92.167 | 94.510  | 59.774 | 0.00 | 0.00 |
| ATOM 29402 | HD2 KCB  | 1963 | 91.331 | 94.425  | 60.468 | 0.00 | 0.00 |
| ATOM 29403 | HD3 KCB  | 1963 | 92.147 | 93.616  | 59.150 | 0.00 | 0.00 |
| ATOM 29404 | CE KCB   | 1963 | 93.487 | 94.540  | 60.514 | 0.00 | 0.00 |
| ATOM 29405 | HE2 KCB  | 1963 | 94.314 | 94.649  | 59.812 | 0.00 | 0.00 |
| ATOM 29406 | HE3 KCB  | 1963 | 93.540 | 95.439  | 61.128 | 0.00 | 0.00 |
| ATOM 29407 | NZ KCB   | 1963 | 93.586 | 93.414  | 61.406 | 0.00 | 0.00 |
| ATOM 29408 | HZ1 KCB  | 1963 | 92.772 | 92.828  | 61.527 | 0.00 | 0.00 |
| ATOM 29409 | CX KCB   | 1963 | 94.458 | 93.097  | 62.364 | 0.00 | 0.00 |
| ATOM 29410 | OX1 KCB  | 1963 | 95.329 | 93.925  | 62.744 | 0.00 | 0.00 |
| ATOM 29411 | OX2 KCB  | 1963 | 94.349 | 91.887  | 62.774 | 0.00 | 0.00 |
| ATOM 29412 | C KCB    | 1963 | 92.085 | 97.132  | 55.884 | 0.00 | 0.00 |
| ATOM 29413 | O KCB    | 1963 | 92.164 | 96.269  | 55.003 | 0.00 | 0.00 |
| ATOM 29414 | N ILE    | 1964 | 93.109 | 97.949  | 56.049 | 0.00 | 0.00 |
| ATOM 29415 | H ILE    | 1964 | 93.047 | 98.566  | 56.846 | 0.00 | 0.00 |
| ATOM 29416 | CA ILE   | 1964 | 94.516 | 97.810  | 55.543 | 0.00 | 0.00 |
| ATOM 29417 | HA ILE   | 1964 | 94.665 | 97.512  | 54.505 | 0.00 | 0.00 |
| ATOM 29418 | CB ILE   | 1964 | 95.123 | 99.176  | 55.630 | 0.00 | 0.00 |
| ATOM 29419 | HB ILE   | 1964 | 94.993 | 99.581  | 56.634 | 0.00 | 0.00 |
| ATOM 29420 | CG2 ILE  | 1964 | 96.660 | 99.102  | 55.376 | 0.00 | 0.00 |
| ATOM 29421 | 1HG2 ILE | 1964 | 97.220 | 98.599  | 56.164 | 0.00 | 0.00 |
| ATOM 29422 | 2HG2 ILE | 1964 | 96.861 | 98.793  | 54.350 | 0.00 | 0.00 |
| ATOM 29423 | 3HG2 ILE | 1964 | 97.091 | 100.100 | 55.458 | 0.00 | 0.00 |
| ATOM 29424 | CG1 ILE  | 1964 | 94.398 | 100.259 | 54.719 | 0.00 | 0.00 |
| ATOM 29425 | 2HG1 ILE | 1964 | 93.342 | 100.128 | 54.957 | 0.00 | 0.00 |

|      |       |      |     |      |        |         |        |      |      |
|------|-------|------|-----|------|--------|---------|--------|------|------|
| ATOM | 29426 | 3HG1 | ILE | 1964 | 94.750 | 101.224 | 55.084 | 0.00 | 0.00 |
| ATOM | 29427 | CD1  | ILE | 1964 | 94.632 | 100.198 | 53.252 | 0.00 | 0.00 |
| ATOM | 29428 | 1HD1 | ILE | 1964 | 94.813 | 99.169  | 52.939 | 0.00 | 0.00 |
| ATOM | 29429 | 2HD1 | ILE | 1964 | 93.729 | 100.635 | 52.828 | 0.00 | 0.00 |
| ATOM | 29430 | 3HD1 | ILE | 1964 | 95.508 | 100.797 | 53.002 | 0.00 | 0.00 |
| ATOM | 29431 | C    | ILE | 1964 | 95.203 | 96.786  | 56.446 | 0.00 | 0.00 |
| ATOM | 29432 | O    | ILE | 1964 | 95.191 | 96.848  | 57.666 | 0.00 | 0.00 |
| ATOM | 29433 | N    | HIE | 1965 | 95.876 | 95.820  | 55.750 | 0.00 | 0.00 |
| ATOM | 29434 | H    | HIE | 1965 | 95.817 | 95.818  | 54.742 | 0.00 | 0.00 |
| ATOM | 29435 | CA   | HIE | 1965 | 96.766 | 94.864  | 56.358 | 0.00 | 0.00 |
| ATOM | 29436 | HA   | HIE | 1965 | 97.062 | 95.340  | 57.293 | 0.00 | 0.00 |
| ATOM | 29437 | CB   | HIE | 1965 | 95.984 | 93.614  | 56.729 | 0.00 | 0.00 |
| ATOM | 29438 | HB2  | HIE | 1965 | 94.918 | 93.780  | 56.888 | 0.00 | 0.00 |
| ATOM | 29439 | HB3  | HIE | 1965 | 96.108 | 92.910  | 55.907 | 0.00 | 0.00 |
| ATOM | 29440 | CG   | HIE | 1965 | 96.506 | 93.047  | 57.969 | 0.00 | 0.00 |
| ATOM | 29441 | ND1  | HIE | 1965 | 97.881 | 92.930  | 58.217 | 0.00 | 0.00 |
| ATOM | 29442 | CE1  | HIE | 1965 | 97.930 | 92.356  | 59.421 | 0.00 | 0.00 |
| ATOM | 29443 | HE1  | HIE | 1965 | 98.836 | 92.130  | 59.963 | 0.00 | 0.00 |
| ATOM | 29444 | NE2  | HIE | 1965 | 96.712 | 92.014  | 59.893 | 0.00 | 0.00 |
| ATOM | 29445 | HE2  | HIE | 1965 | 96.522 | 91.584  | 60.787 | 0.00 | 0.00 |
| ATOM | 29446 | CD2  | HIE | 1965 | 95.780 | 92.543  | 59.025 | 0.00 | 0.00 |
| ATOM | 29447 | HD2  | HIE | 1965 | 94.702 | 92.475  | 59.037 | 0.00 | 0.00 |
| ATOM | 29448 | C    | HIE | 1965 | 97.968 | 94.541  | 55.442 | 0.00 | 0.00 |
| ATOM | 29449 | O    | HIE | 1965 | 97.829 | 94.156  | 54.302 | 0.00 | 0.00 |
| ATOM | 29450 | N    | GLU | 1966 | 99.165 | 94.616  | 55.999 | 0.00 | 0.00 |
| ATOM | 29451 | H    | GLU | 1966 | 99.341 | 94.819  | 56.973 | 0.00 | 0.00 |



|      |       |     |     |      |         |        |        |      |      |
|------|-------|-----|-----|------|---------|--------|--------|------|------|
| ATOM | 29452 | CA  | GLU | 1966 | 100.442 | 94.121 | 55.391 | 0.00 | 0.00 |
| ATOM | 29453 | HA  | GLU | 1966 | 100.634 | 94.747 | 54.520 | 0.00 | 0.00 |
| ATOM | 29454 | CB  | GLU | 1966 | 101.647 | 94.294 | 56.278 | 0.00 | 0.00 |
| ATOM | 29455 | HB2 | GLU | 1966 | 102.453 | 93.583 | 56.096 | 0.00 | 0.00 |
| ATOM | 29456 | HB3 | GLU | 1966 | 101.995 | 95.312 | 56.099 | 0.00 | 0.00 |
| ATOM | 29457 | CG  | GLU | 1966 | 101.319 | 94.163 | 57.757 | 0.00 | 0.00 |
| ATOM | 29458 | HG2 | GLU | 1966 | 100.822 | 95.069 | 58.103 | 0.00 | 0.00 |
| ATOM | 29459 | HG3 | GLU | 1966 | 100.514 | 93.428 | 57.744 | 0.00 | 0.00 |
| ATOM | 29460 | CD  | GLU | 1966 | 102.466 | 93.743 | 58.705 | 0.00 | 0.00 |
| ATOM | 29461 | OE1 | GLU | 1966 | 103.656 | 93.905 | 58.402 | 0.00 | 0.00 |
| ATOM | 29462 | OE2 | GLU | 1966 | 102.164 | 93.117 | 59.765 | 0.00 | 0.00 |
| ATOM | 29463 | C   | GLU | 1966 | 100.292 | 92.612 | 54.996 | 0.00 | 0.00 |
| ATOM | 29464 | O   | GLU | 1966 | 100.734 | 92.318 | 53.881 | 0.00 | 0.00 |
| ATOM | 29465 | N   | ASP | 1967 | 99.592  | 91.746 | 55.736 | 0.00 | 0.00 |
| ATOM | 29466 | H   | ASP | 1967 | 99.287  | 92.105 | 56.629 | 0.00 | 0.00 |
| ATOM | 29467 | CA  | ASP | 1967 | 99.290  | 90.421 | 55.323 | 0.00 | 0.00 |
| ATOM | 29468 | HA  | ASP | 1967 | 100.202 | 89.836 | 55.204 | 0.00 | 0.00 |
| ATOM | 29469 | CB  | ASP | 1967 | 98.477  | 89.799 | 56.409 | 0.00 | 0.00 |
| ATOM | 29470 | HB2 | ASP | 1967 | 97.661  | 90.401 | 56.810 | 0.00 | 0.00 |
| ATOM | 29471 | HB3 | ASP | 1967 | 98.054  | 88.849 | 56.083 | 0.00 | 0.00 |
| ATOM | 29472 | CG  | ASP | 1967 | 99.370  | 89.439 | 57.599 | 0.00 | 0.00 |
| ATOM | 29473 | OD1 | ASP | 1967 | 98.901  | 89.522 | 58.720 | 0.00 | 0.00 |
| ATOM | 29474 | OD2 | ASP | 1967 | 100.522 | 88.958 | 57.512 | 0.00 | 0.00 |
| ATOM | 29475 | C   | ASP | 1967 | 98.579  | 90.336 | 53.962 | 0.00 | 0.00 |
| ATOM | 29476 | O   | ASP | 1967 | 98.839  | 89.365 | 53.229 | 0.00 | 0.00 |
| ATOM | 29477 | N   | TRP | 1968 | 97.830  | 91.340 | 53.532 | 0.00 | 0.00 |

|            |     |     |      |         |        |        |      |      |
|------------|-----|-----|------|---------|--------|--------|------|------|
| ATOM 29478 | H   | TRP | 1968 | 97.672  | 92.015 | 54.266 | 0.00 | 0.00 |
| ATOM 29479 | CA  | TRP | 1968 | 97.257  | 91.395 | 52.208 | 0.00 | 0.00 |
| ATOM 29480 | HA  | TRP | 1968 | 97.254  | 90.378 | 51.816 | 0.00 | 0.00 |
| ATOM 29481 | CB  | TRP | 1968 | 95.763  | 91.877 | 52.450 | 0.00 | 0.00 |
| ATOM 29482 | HB2 | TRP | 1968 | 95.674  | 92.751 | 53.094 | 0.00 | 0.00 |
| ATOM 29483 | HB3 | TRP | 1968 | 95.302  | 92.033 | 51.475 | 0.00 | 0.00 |
| ATOM 29484 | CG  | TRP | 1968 | 94.911  | 90.876 | 53.065 | 0.00 | 0.00 |
| ATOM 29485 | CD1 | TRP | 1968 | 94.158  | 91.164 | 54.191 | 0.00 | 0.00 |
| ATOM 29486 | HD1 | TRP | 1968 | 94.207  | 92.072 | 54.773 | 0.00 | 0.00 |
| ATOM 29487 | NE1 | TRP | 1968 | 93.347  | 90.062 | 54.382 | 0.00 | 0.00 |
| ATOM 29488 | HE1 | TRP | 1968 | 92.719  | 90.059 | 55.173 | 0.00 | 0.00 |
| ATOM 29489 | CE2 | TRP | 1968 | 93.529  | 89.048 | 53.488 | 0.00 | 0.00 |
| ATOM 29490 | CZ2 | TRP | 1968 | 92.829  | 87.876 | 53.250 | 0.00 | 0.00 |
| ATOM 29491 | HZ2 | TRP | 1968 | 92.078  | 87.545 | 53.952 | 0.00 | 0.00 |
| ATOM 29492 | CH2 | TRP | 1968 | 93.095  | 87.111 | 52.114 | 0.00 | 0.00 |
| ATOM 29493 | HH2 | TRP | 1968 | 92.554  | 86.191 | 51.946 | 0.00 | 0.00 |
| ATOM 29494 | CZ3 | TRP | 1968 | 94.082  | 87.535 | 51.265 | 0.00 | 0.00 |
| ATOM 29495 | HZ3 | TRP | 1968 | 94.327  | 86.957 | 50.386 | 0.00 | 0.00 |
| ATOM 29496 | CE3 | TRP | 1968 | 94.808  | 88.721 | 51.509 | 0.00 | 0.00 |
| ATOM 29497 | HE3 | TRP | 1968 | 95.511  | 89.046 | 50.756 | 0.00 | 0.00 |
| ATOM 29498 | CD2 | TRP | 1968 | 94.549  | 89.573 | 52.609 | 0.00 | 0.00 |
| ATOM 29499 | C   | TRP | 1968 | 97.990  | 92.330 | 51.270 | 0.00 | 0.00 |
| ATOM 29500 | O   | TRP | 1968 | 97.714  | 92.375 | 50.115 | 0.00 | 0.00 |
| ATOM 29501 | N   | GLY | 1969 | 99.006  | 93.094 | 51.706 | 0.00 | 0.00 |
| ATOM 29502 | H   | GLY | 1969 | 99.175  | 93.115 | 52.702 | 0.00 | 0.00 |
| ATOM 29503 | CA  | GLY | 1969 | 100.023 | 93.771 | 50.890 | 0.00 | 0.00 |

|      |       |      |     |      |         |        |        |      |      |
|------|-------|------|-----|------|---------|--------|--------|------|------|
| ATOM | 29504 | HA2  | GLY | 1969 | 100.799 | 93.051 | 50.630 | 0.00 | 0.00 |
| ATOM | 29505 | HA3  | GLY | 1969 | 99.618  | 94.136 | 49.946 | 0.00 | 0.00 |
| ATOM | 29506 | C    | GLY | 1969 | 100.571 | 94.969 | 51.536 | 0.00 | 0.00 |
| ATOM | 29507 | O    | GLY | 1969 | 99.807  | 95.800 | 51.994 | 0.00 | 0.00 |
| ATOM | 29508 | N    | ALA | 1970 | 101.851 | 95.045 | 51.534 | 0.00 | 0.00 |
| ATOM | 29509 | H    | ALA | 1970 | 102.382 | 94.318 | 51.077 | 0.00 | 0.00 |
| ATOM | 29510 | CA   | ALA | 1970 | 102.427 | 96.279 | 51.959 | 0.00 | 0.00 |
| ATOM | 29511 | HA   | ALA | 1970 | 101.853 | 96.737 | 52.765 | 0.00 | 0.00 |
| ATOM | 29512 | CB   | ALA | 1970 | 103.769 | 96.014 | 52.489 | 0.00 | 0.00 |
| ATOM | 29513 | HB1  | ALA | 1970 | 103.638 | 95.353 | 53.346 | 0.00 | 0.00 |
| ATOM | 29514 | HB2  | ALA | 1970 | 104.435 | 95.604 | 51.729 | 0.00 | 0.00 |
| ATOM | 29515 | HB3  | ALA | 1970 | 104.228 | 96.953 | 52.798 | 0.00 | 0.00 |
| ATOM | 29516 | C    | ALA | 1970 | 102.360 | 97.339 | 50.808 | 0.00 | 0.00 |
| ATOM | 29517 | O    | ALA | 1970 | 103.379 | 97.638 | 50.176 | 0.00 | 0.00 |
| ATOM | 29518 | N    | THR | 1971 | 101.200 | 97.844 | 50.495 | 0.00 | 0.00 |
| ATOM | 29519 | H    | THR | 1971 | 100.418 | 97.444 | 50.994 | 0.00 | 0.00 |
| ATOM | 29520 | CA   | THR | 1971 | 100.927 | 98.731 | 49.317 | 0.00 | 0.00 |
| ATOM | 29521 | HA   | THR | 1971 | 101.884 | 98.850 | 48.808 | 0.00 | 0.00 |
| ATOM | 29522 | CB   | THR | 1971 | 99.890  | 97.998 | 48.440 | 0.00 | 0.00 |
| ATOM | 29523 | HB   | THR | 1971 | 99.679  | 98.675 | 47.613 | 0.00 | 0.00 |
| ATOM | 29524 | CG2  | THR | 1971 | 100.512 | 96.842 | 47.754 | 0.00 | 0.00 |
| ATOM | 29525 | 1HG2 | THR | 1971 | 100.126 | 96.716 | 46.742 | 0.00 | 0.00 |
| ATOM | 29526 | 2HG2 | THR | 1971 | 101.559 | 97.035 | 47.524 | 0.00 | 0.00 |
| ATOM | 29527 | 3HG2 | THR | 1971 | 100.528 | 95.948 | 48.378 | 0.00 | 0.00 |
| ATOM | 29528 | OG1  | THR | 1971 | 98.727  | 97.664 | 48.968 | 0.00 | 0.00 |
| ATOM | 29529 | HG1  | THR | 1971 | 98.089  | 97.495 | 48.271 | 0.00 | 0.00 |

|            |     |     |      |         |         |        |      |      |
|------------|-----|-----|------|---------|---------|--------|------|------|
| ATOM 29530 | C   | THR | 1971 | 100.490 | 100.149 | 49.702 | 0.00 | 0.00 |
| ATOM 29531 | O   | THR | 1971 | 99.270  | 100.405 | 49.877 | 0.00 | 0.00 |
| ATOM 29532 | N   | PRO | 1972 | 101.415 | 101.148 | 49.647 | 0.00 | 0.00 |
| ATOM 29533 | CD  | PRO | 1972 | 102.887 | 101.040 | 49.850 | 0.00 | 0.00 |
| ATOM 29534 | HD2 | PRO | 1972 | 103.028 | 100.086 | 50.359 | 0.00 | 0.00 |
| ATOM 29535 | HD3 | PRO | 1972 | 103.326 | 101.055 | 48.852 | 0.00 | 0.00 |
| ATOM 29536 | CG  | PRO | 1972 | 103.304 | 102.292 | 50.690 | 0.00 | 0.00 |
| ATOM 29537 | HG2 | PRO | 1972 | 103.149 | 102.076 | 51.747 | 0.00 | 0.00 |
| ATOM 29538 | HG3 | PRO | 1972 | 104.317 | 102.578 | 50.406 | 0.00 | 0.00 |
| ATOM 29539 | CB  | PRO | 1972 | 102.238 | 103.275 | 50.063 | 0.00 | 0.00 |
| ATOM 29540 | HB2 | PRO | 1972 | 102.199 | 104.218 | 50.609 | 0.00 | 0.00 |
| ATOM 29541 | HB3 | PRO | 1972 | 102.472 | 103.582 | 49.044 | 0.00 | 0.00 |
| ATOM 29542 | CA  | PRO | 1972 | 100.898 | 102.521 | 49.958 | 0.00 | 0.00 |
| ATOM 29543 | HA  | PRO | 1972 | 100.325 | 102.548 | 50.885 | 0.00 | 0.00 |
| ATOM 29544 | C   | PRO | 1972 | 99.891  | 103.127 | 48.901 | 0.00 | 0.00 |
| ATOM 29545 | O   | PRO | 1972 | 99.134  | 103.924 | 49.231 | 0.00 | 0.00 |
| ATOM 29546 | N   | ALA | 1973 | 99.861  | 102.561 | 47.665 | 0.00 | 0.00 |
| ATOM 29547 | H   | ALA | 1973 | 100.592 | 101.891 | 47.471 | 0.00 | 0.00 |
| ATOM 29548 | CA  | ALA | 1973 | 98.737  | 102.596 | 46.662 | 0.00 | 0.00 |
| ATOM 29549 | HA  | ALA | 1973 | 98.605  | 103.642 | 46.389 | 0.00 | 0.00 |
| ATOM 29550 | CB  | ALA | 1973 | 99.226  | 101.710 | 45.596 | 0.00 | 0.00 |
| ATOM 29551 | HB1 | ALA | 1973 | 99.372  | 100.692 | 45.958 | 0.00 | 0.00 |
| ATOM 29552 | HB2 | ALA | 1973 | 98.436  | 101.695 | 44.845 | 0.00 | 0.00 |
| ATOM 29553 | HB3 | ALA | 1973 | 100.171 | 102.041 | 45.165 | 0.00 | 0.00 |
| ATOM 29554 | C   | ALA | 1973 | 97.337  | 102.180 | 47.210 | 0.00 | 0.00 |
| ATOM 29555 | O   | ALA | 1973 | 96.367  | 102.964 | 47.035 | 0.00 | 0.00 |

|      |       |      |     |      |         |         |        |      |      |
|------|-------|------|-----|------|---------|---------|--------|------|------|
| ATOM | 29556 | N    | ALA | 1974 | 97.187  | 101.119 | 48.026 | 0.00 | 0.00 |
| ATOM | 29557 | H    | ALA | 1974 | 98.064  | 100.651 | 48.203 | 0.00 | 0.00 |
| ATOM | 29558 | CA   | ALA | 1974 | 95.909  | 100.729 | 48.641 | 0.00 | 0.00 |
| ATOM | 29559 | HA   | ALA | 1974 | 95.161  | 100.845 | 47.857 | 0.00 | 0.00 |
| ATOM | 29560 | CB   | ALA | 1974 | 95.860  | 99.376  | 49.281 | 0.00 | 0.00 |
| ATOM | 29561 | HB1  | ALA | 1974 | 94.782  | 99.295  | 49.422 | 0.00 | 0.00 |
| ATOM | 29562 | HB2  | ALA | 1974 | 96.259  | 98.628  | 48.596 | 0.00 | 0.00 |
| ATOM | 29563 | HB3  | ALA | 1974 | 96.413  | 99.354  | 50.220 | 0.00 | 0.00 |
| ATOM | 29564 | C    | ALA | 1974 | 95.450  | 101.743 | 49.728 | 0.00 | 0.00 |
| ATOM | 29565 | O    | ALA | 1974 | 94.239  | 102.102 | 49.704 | 0.00 | 0.00 |
| ATOM | 29566 | N    | ILE | 1975 | 96.347  | 102.236 | 50.624 | 0.00 | 0.00 |
| ATOM | 29567 | H    | ILE | 1975 | 97.309  | 101.933 | 50.686 | 0.00 | 0.00 |
| ATOM | 29568 | CA   | ILE | 1975 | 96.025  | 103.233 | 51.673 | 0.00 | 0.00 |
| ATOM | 29569 | HA   | ILE | 1975 | 95.520  | 102.753 | 52.512 | 0.00 | 0.00 |
| ATOM | 29570 | CB   | ILE | 1975 | 97.333  | 103.815 | 52.359 | 0.00 | 0.00 |
| ATOM | 29571 | HB   | ILE | 1975 | 97.934  | 104.299 | 51.590 | 0.00 | 0.00 |
| ATOM | 29572 | CG2  | ILE | 1975 | 96.915  | 104.796 | 53.532 | 0.00 | 0.00 |
| ATOM | 29573 | 1HG2 | ILE | 1975 | 96.870  | 104.224 | 54.459 | 0.00 | 0.00 |
| ATOM | 29574 | 2HG2 | ILE | 1975 | 97.641  | 105.597 | 53.667 | 0.00 | 0.00 |
| ATOM | 29575 | 3HG2 | ILE | 1975 | 95.991  | 105.337 | 53.327 | 0.00 | 0.00 |
| ATOM | 29576 | CG1  | ILE | 1975 | 98.226  | 102.688 | 52.955 | 0.00 | 0.00 |
| ATOM | 29577 | 2HG1 | ILE | 1975 | 97.788  | 102.143 | 53.791 | 0.00 | 0.00 |
| ATOM | 29578 | 3HG1 | ILE | 1975 | 98.455  | 101.899 | 52.238 | 0.00 | 0.00 |
| ATOM | 29579 | CD1  | ILE | 1975 | 99.599  | 103.313 | 53.441 | 0.00 | 0.00 |
| ATOM | 29580 | 1HD1 | ILE | 1975 | 100.276 | 102.530 | 53.784 | 0.00 | 0.00 |
| ATOM | 29581 | 2HD1 | ILE | 1975 | 100.081 | 103.764 | 52.574 | 0.00 | 0.00 |

|            |      |     |      |        |         |        |      |      |
|------------|------|-----|------|--------|---------|--------|------|------|
| ATOM 29582 | 3HD1 | ILE | 1975 | 99.385 | 104.191 | 54.050 | 0.00 | 0.00 |
| ATOM 29583 | C    | ILE | 1975 | 95.188 | 104.386 | 51.072 | 0.00 | 0.00 |
| ATOM 29584 | O    | ILE | 1975 | 93.994 | 104.560 | 51.454 | 0.00 | 0.00 |
| ATOM 29585 | N    | ASP | 1976 | 95.779 | 104.882 | 49.975 | 0.00 | 0.00 |
| ATOM 29586 | H    | ASP | 1976 | 96.645 | 104.491 | 49.634 | 0.00 | 0.00 |
| ATOM 29587 | CA   | ASP | 1976 | 95.124 | 105.964 | 49.199 | 0.00 | 0.00 |
| ATOM 29588 | HA   | ASP | 1976 | 94.778 | 106.803 | 49.802 | 0.00 | 0.00 |
| ATOM 29589 | CB   | ASP | 1976 | 96.099 | 106.492 | 48.162 | 0.00 | 0.00 |
| ATOM 29590 | HB2  | ASP | 1976 | 96.967 | 106.849 | 48.717 | 0.00 | 0.00 |
| ATOM 29591 | HB3  | ASP | 1976 | 96.358 | 105.697 | 47.463 | 0.00 | 0.00 |
| ATOM 29592 | CG   | ASP | 1976 | 95.431 | 107.574 | 47.387 | 0.00 | 0.00 |
| ATOM 29593 | OD1  | ASP | 1976 | 95.184 | 107.378 | 46.235 | 0.00 | 0.00 |
| ATOM 29594 | OD2  | ASP | 1976 | 95.017 | 108.579 | 48.029 | 0.00 | 0.00 |
| ATOM 29595 | C    | ASP | 1976 | 93.848 | 105.503 | 48.401 | 0.00 | 0.00 |
| ATOM 29596 | O    | ASP | 1976 | 92.770 | 106.130 | 48.462 | 0.00 | 0.00 |
| ATOM 29597 | N    | CYS | 1977 | 93.900 | 104.271 | 47.824 | 0.00 | 0.00 |
| ATOM 29598 | H    | CYS | 1977 | 94.772 | 103.762 | 47.853 | 0.00 | 0.00 |
| ATOM 29599 | CA   | CYS | 1977 | 92.723 | 103.667 | 47.128 | 0.00 | 0.00 |
| ATOM 29600 | HA   | CYS | 1977 | 92.458 | 104.317 | 46.295 | 0.00 | 0.00 |
| ATOM 29601 | CB   | CYS | 1977 | 93.156 | 102.305 | 46.615 | 0.00 | 0.00 |
| ATOM 29602 | HB2  | CYS | 1977 | 94.164 | 102.323 | 46.201 | 0.00 | 0.00 |
| ATOM 29603 | HB3  | CYS | 1977 | 93.281 | 101.610 | 47.445 | 0.00 | 0.00 |
| ATOM 29604 | SG   | CYS | 1977 | 91.926 | 101.719 | 45.361 | 0.00 | 0.00 |
| ATOM 29605 | HG   | CYS | 1977 | 91.372 | 100.677 | 45.987 | 0.00 | 0.00 |
| ATOM 29606 | C    | CYS | 1977 | 91.427 | 103.660 | 48.017 | 0.00 | 0.00 |
| ATOM 29607 | O    | CYS | 1977 | 90.369 | 104.166 | 47.606 | 0.00 | 0.00 |

|            |      |     |      |        |         |        |      |      |
|------------|------|-----|------|--------|---------|--------|------|------|
| ATOM 29608 | N    | ALA | 1978 | 91.568 | 103.177 | 49.270 | 0.00 | 0.00 |
| ATOM 29609 | H    | ALA | 1978 | 92.469 | 102.758 | 49.450 | 0.00 | 0.00 |
| ATOM 29610 | CA   | ALA | 1978 | 90.537 | 102.916 | 50.219 | 0.00 | 0.00 |
| ATOM 29611 | HA   | ALA | 1978 | 89.719 | 102.386 | 49.731 | 0.00 | 0.00 |
| ATOM 29612 | CB   | ALA | 1978 | 91.131 | 102.012 | 51.294 | 0.00 | 0.00 |
| ATOM 29613 | HB1  | ALA | 1978 | 90.398 | 101.745 | 52.055 | 0.00 | 0.00 |
| ATOM 29614 | HB2  | ALA | 1978 | 91.311 | 101.021 | 50.877 | 0.00 | 0.00 |
| ATOM 29615 | HB3  | ALA | 1978 | 92.040 | 102.374 | 51.774 | 0.00 | 0.00 |
| ATOM 29616 | C    | ALA | 1978 | 89.988 | 104.235 | 50.775 | 0.00 | 0.00 |
| ATOM 29617 | O    | ALA | 1978 | 88.790 | 104.335 | 50.919 | 0.00 | 0.00 |
| ATOM 29618 | N    | LEU | 1979 | 90.893 | 105.205 | 50.928 | 0.00 | 0.00 |
| ATOM 29619 | H    | LEU | 1979 | 91.862 | 105.071 | 50.678 | 0.00 | 0.00 |
| ATOM 29620 | CA   | LEU | 1979 | 90.524 | 106.479 | 51.375 | 0.00 | 0.00 |
| ATOM 29621 | HA   | LEU | 1979 | 89.766 | 106.345 | 52.146 | 0.00 | 0.00 |
| ATOM 29622 | CB   | LEU | 1979 | 91.740 | 107.273 | 51.962 | 0.00 | 0.00 |
| ATOM 29623 | HB2  | LEU | 1979 | 92.547 | 107.305 | 51.229 | 0.00 | 0.00 |
| ATOM 29624 | HB3  | LEU | 1979 | 91.397 | 108.282 | 52.190 | 0.00 | 0.00 |
| ATOM 29625 | CG   | LEU | 1979 | 92.200 | 106.639 | 53.194 | 0.00 | 0.00 |
| ATOM 29626 | HG   | LEU | 1979 | 92.340 | 105.591 | 52.931 | 0.00 | 0.00 |
| ATOM 29627 | CD1  | LEU | 1979 | 93.552 | 107.282 | 53.554 | 0.00 | 0.00 |
| ATOM 29628 | 1HD1 | LEU | 1979 | 93.399 | 108.346 | 53.735 | 0.00 | 0.00 |
| ATOM 29629 | 2HD1 | LEU | 1979 | 94.021 | 106.813 | 54.419 | 0.00 | 0.00 |
| ATOM 29630 | 3HD1 | LEU | 1979 | 94.286 | 107.211 | 52.752 | 0.00 | 0.00 |
| ATOM 29631 | CD2  | LEU | 1979 | 91.283 | 106.866 | 54.368 | 0.00 | 0.00 |
| ATOM 29632 | 1HD2 | LEU | 1979 | 91.678 | 106.232 | 55.162 | 0.00 | 0.00 |
| ATOM 29633 | 2HD2 | LEU | 1979 | 91.137 | 107.915 | 54.624 | 0.00 | 0.00 |

|            |      |     |      |        |         |        |      |      |
|------------|------|-----|------|--------|---------|--------|------|------|
| ATOM 29634 | 3HD2 | LEU | 1979 | 90.277 | 106.511 | 54.143 | 0.00 | 0.00 |
| ATOM 29635 | C    | LEU | 1979 | 89.840 | 107.303 | 50.297 | 0.00 | 0.00 |
| ATOM 29636 | O    | LEU | 1979 | 89.107 | 108.211 | 50.585 | 0.00 | 0.00 |
| ATOM 29637 | N    | THR | 1980 | 89.986 | 106.984 | 48.981 | 0.00 | 0.00 |
| ATOM 29638 | H    | THR | 1980 | 90.666 | 106.251 | 48.835 | 0.00 | 0.00 |
| ATOM 29639 | CA   | THR | 1980 | 89.242 | 107.573 | 47.843 | 0.00 | 0.00 |
| ATOM 29640 | HA   | THR | 1980 | 89.144 | 108.629 | 48.094 | 0.00 | 0.00 |
| ATOM 29641 | CB   | THR | 1980 | 90.041 | 107.428 | 46.547 | 0.00 | 0.00 |
| ATOM 29642 | HB   | THR | 1980 | 89.840 | 106.425 | 46.170 | 0.00 | 0.00 |
| ATOM 29643 | CG2  | THR | 1980 | 89.653 | 108.388 | 45.466 | 0.00 | 0.00 |
| ATOM 29644 | 1HG2 | THR | 1980 | 89.937 | 109.402 | 45.748 | 0.00 | 0.00 |
| ATOM 29645 | 2HG2 | THR | 1980 | 90.206 | 108.139 | 44.561 | 0.00 | 0.00 |
| ATOM 29646 | 3HG2 | THR | 1980 | 88.571 | 108.352 | 45.336 | 0.00 | 0.00 |
| ATOM 29647 | OG1  | THR | 1980 | 91.472 | 107.673 | 46.629 | 0.00 | 0.00 |
| ATOM 29648 | HG1  | THR | 1980 | 91.797 | 107.087 | 47.317 | 0.00 | 0.00 |
| ATOM 29649 | C    | THR | 1980 | 87.850 | 106.953 | 47.739 | 0.00 | 0.00 |
| ATOM 29650 | O    | THR | 1980 | 86.884 | 107.566 | 47.339 | 0.00 | 0.00 |
| ATOM 29651 | N    | VAL | 1981 | 87.614 | 105.723 | 48.106 | 0.00 | 0.00 |
| ATOM 29652 | H    | VAL | 1981 | 88.363 | 105.163 | 48.486 | 0.00 | 0.00 |
| ATOM 29653 | CA   | VAL | 1981 | 86.258 | 105.085 | 48.267 | 0.00 | 0.00 |
| ATOM 29654 | HA   | VAL | 1981 | 85.635 | 105.479 | 47.463 | 0.00 | 0.00 |
| ATOM 29655 | CB   | VAL | 1981 | 86.374 | 103.505 | 48.276 | 0.00 | 0.00 |
| ATOM 29656 | HB   | VAL | 1981 | 87.124 | 103.162 | 48.988 | 0.00 | 0.00 |
| ATOM 29657 | CG1  | VAL | 1981 | 85.111 | 102.845 | 48.799 | 0.00 | 0.00 |
| ATOM 29658 | 1HG1 | VAL | 1981 | 85.190 | 102.602 | 49.859 | 0.00 | 0.00 |
| ATOM 29659 | 2HG1 | VAL | 1981 | 84.249 | 103.503 | 48.690 | 0.00 | 0.00 |



|      |       |      |     |      |        |         |        |      |      |
|------|-------|------|-----|------|--------|---------|--------|------|------|
| ATOM | 29660 | 3HG1 | VAL | 1981 | 84.962 | 101.867 | 48.341 | 0.00 | 0.00 |
| ATOM | 29661 | CG2  | VAL | 1981 | 86.846 | 103.087 | 46.872 | 0.00 | 0.00 |
| ATOM | 29662 | 1HG2 | VAL | 1981 | 87.747 | 103.672 | 46.683 | 0.00 | 0.00 |
| ATOM | 29663 | 2HG2 | VAL | 1981 | 86.819 | 101.999 | 46.819 | 0.00 | 0.00 |
| ATOM | 29664 | 3HG2 | VAL | 1981 | 86.106 | 103.363 | 46.121 | 0.00 | 0.00 |
| ATOM | 29665 | C    | VAL | 1981 | 85.600 | 105.476 | 49.555 | 0.00 | 0.00 |
| ATOM | 29666 | O    | VAL | 1981 | 84.382 | 105.707 | 49.573 | 0.00 | 0.00 |
| ATOM | 29667 | N    | ALA | 1982 | 86.352 | 105.627 | 50.669 | 0.00 | 0.00 |
| ATOM | 29668 | H    | ALA | 1982 | 87.254 | 105.177 | 50.732 | 0.00 | 0.00 |
| ATOM | 29669 | CA   | ALA | 1982 | 85.776 | 106.127 | 51.902 | 0.00 | 0.00 |
| ATOM | 29670 | HA   | ALA | 1982 | 84.972 | 105.468 | 52.232 | 0.00 | 0.00 |
| ATOM | 29671 | CB   | ALA | 1982 | 86.830 | 106.227 | 52.985 | 0.00 | 0.00 |
| ATOM | 29672 | HB1  | ALA | 1982 | 87.547 | 106.965 | 52.624 | 0.00 | 0.00 |
| ATOM | 29673 | HB2  | ALA | 1982 | 86.352 | 106.557 | 53.907 | 0.00 | 0.00 |
| ATOM | 29674 | HB3  | ALA | 1982 | 87.408 | 105.305 | 53.045 | 0.00 | 0.00 |
| ATOM | 29675 | C    | ALA | 1982 | 85.141 | 107.436 | 51.732 | 0.00 | 0.00 |
| ATOM | 29676 | O    | ALA | 1982 | 84.110 | 107.669 | 52.261 | 0.00 | 0.00 |
| ATOM | 29677 | N    | ASP | 1983 | 85.756 | 108.324 | 50.939 | 0.00 | 0.00 |
| ATOM | 29678 | H    | ASP | 1983 | 86.652 | 108.087 | 50.537 | 0.00 | 0.00 |
| ATOM | 29679 | CA   | ASP | 1983 | 85.239 | 109.721 | 50.729 | 0.00 | 0.00 |
| ATOM | 29680 | HA   | ASP | 1983 | 85.247 | 110.222 | 51.697 | 0.00 | 0.00 |
| ATOM | 29681 | CB   | ASP | 1983 | 86.364 | 110.371 | 49.847 | 0.00 | 0.00 |
| ATOM | 29682 | HB2  | ASP | 1983 | 87.254 | 110.514 | 50.459 | 0.00 | 0.00 |
| ATOM | 29683 | HB3  | ASP | 1983 | 86.589 | 109.666 | 49.046 | 0.00 | 0.00 |
| ATOM | 29684 | CG   | ASP | 1983 | 86.203 | 111.792 | 49.349 | 0.00 | 0.00 |
| ATOM | 29685 | OD1  | ASP | 1983 | 86.187 | 111.898 | 48.144 | 0.00 | 0.00 |

|      |       |     |     |      |        |         |        |      |      |
|------|-------|-----|-----|------|--------|---------|--------|------|------|
| ATOM | 29686 | OD2 | ASP | 1983 | 86.087 | 112.786 | 50.110 | 0.00 | 0.00 |
| ATOM | 29687 | C   | ASP | 1983 | 83.927 | 109.822 | 49.940 | 0.00 | 0.00 |
| ATOM | 29688 | O   | ASP | 1983 | 83.133 | 110.793 | 50.060 | 0.00 | 0.00 |
| ATOM | 29689 | N   | GLU | 1984 | 83.585 | 108.746 | 49.192 | 0.00 | 0.00 |
| ATOM | 29690 | H   | GLU | 1984 | 84.122 | 107.892 | 49.247 | 0.00 | 0.00 |
| ATOM | 29691 | CA  | GLU | 1984 | 82.368 | 108.558 | 48.404 | 0.00 | 0.00 |
| ATOM | 29692 | HA  | GLU | 1984 | 81.882 | 109.517 | 48.223 | 0.00 | 0.00 |
| ATOM | 29693 | CB  | GLU | 1984 | 82.756 | 108.348 | 46.927 | 0.00 | 0.00 |
| ATOM | 29694 | HB2 | GLU | 1984 | 81.848 | 108.318 | 46.325 | 0.00 | 0.00 |
| ATOM | 29695 | HB3 | GLU | 1984 | 83.363 | 109.203 | 46.630 | 0.00 | 0.00 |
| ATOM | 29696 | CG  | GLU | 1984 | 83.451 | 107.021 | 46.759 | 0.00 | 0.00 |
| ATOM | 29697 | HG2 | GLU | 1984 | 84.372 | 107.106 | 47.336 | 0.00 | 0.00 |
| ATOM | 29698 | HG3 | GLU | 1984 | 82.955 | 106.131 | 47.146 | 0.00 | 0.00 |
| ATOM | 29699 | CD  | GLU | 1984 | 83.811 | 106.731 | 45.307 | 0.00 | 0.00 |
| ATOM | 29700 | OE1 | GLU | 1984 | 83.026 | 107.140 | 44.456 | 0.00 | 0.00 |
| ATOM | 29701 | OE2 | GLU | 1984 | 84.889 | 106.173 | 45.069 | 0.00 | 0.00 |
| ATOM | 29702 | C   | GLU | 1984 | 81.266 | 107.650 | 48.912 | 0.00 | 0.00 |
| ATOM | 29703 | O   | GLU | 1984 | 80.112 | 107.790 | 48.609 | 0.00 | 0.00 |
| ATOM | 29704 | N   | MET | 1985 | 81.550 | 106.621 | 49.764 | 0.00 | 0.00 |
| ATOM | 29705 | H   | MET | 1985 | 82.549 | 106.559 | 49.900 | 0.00 | 0.00 |
| ATOM | 29706 | CA  | MET | 1985 | 80.596 | 105.574 | 50.261 | 0.00 | 0.00 |
| ATOM | 29707 | HA  | MET | 1985 | 79.572 | 105.830 | 49.989 | 0.00 | 0.00 |
| ATOM | 29708 | CB  | MET | 1985 | 80.853 | 104.196 | 49.677 | 0.00 | 0.00 |
| ATOM | 29709 | HB2 | MET | 1985 | 81.791 | 103.833 | 50.098 | 0.00 | 0.00 |
| ATOM | 29710 | HB3 | MET | 1985 | 80.102 | 103.580 | 50.173 | 0.00 | 0.00 |
| ATOM | 29711 | CG  | MET | 1985 | 80.861 | 104.032 | 48.148 | 0.00 | 0.00 |

|      |       |     |     |      |        |         |        |      |      |
|------|-------|-----|-----|------|--------|---------|--------|------|------|
| ATOM | 29712 | HG2 | MET | 1985 | 79.997 | 104.548 | 47.729 | 0.00 | 0.00 |
| ATOM | 29713 | HG3 | MET | 1985 | 81.754 | 104.490 | 47.723 | 0.00 | 0.00 |
| ATOM | 29714 | SD  | MET | 1985 | 80.916 | 102.222 | 47.673 | 0.00 | 0.00 |
| ATOM | 29715 | CE  | MET | 1985 | 79.907 | 102.218 | 46.164 | 0.00 | 0.00 |
| ATOM | 29716 | HE1 | MET | 1985 | 78.982 | 102.774 | 46.318 | 0.00 | 0.00 |
| ATOM | 29717 | HE2 | MET | 1985 | 80.449 | 102.786 | 45.408 | 0.00 | 0.00 |
| ATOM | 29718 | HE3 | MET | 1985 | 79.701 | 101.224 | 45.766 | 0.00 | 0.00 |
| ATOM | 29719 | C   | MET | 1985 | 80.565 | 105.549 | 51.767 | 0.00 | 0.00 |
| ATOM | 29720 | O   | MET | 1985 | 80.025 | 104.672 | 52.401 | 0.00 | 0.00 |
| ATOM | 29721 | N   | ASP | 1986 | 81.133 | 106.590 | 52.409 | 0.00 | 0.00 |
| ATOM | 29722 | H   | ASP | 1986 | 81.247 | 107.393 | 51.807 | 0.00 | 0.00 |
| ATOM | 29723 | CA  | ASP | 1986 | 80.983 | 106.902 | 53.814 | 0.00 | 0.00 |
| ATOM | 29724 | HA  | ASP | 1986 | 81.864 | 107.513 | 54.008 | 0.00 | 0.00 |
| ATOM | 29725 | CB  | ASP | 1986 | 79.677 | 107.748 | 54.016 | 0.00 | 0.00 |
| ATOM | 29726 | HB2 | ASP | 1986 | 79.644 | 108.512 | 53.239 | 0.00 | 0.00 |
| ATOM | 29727 | HB3 | ASP | 1986 | 78.785 | 107.134 | 53.888 | 0.00 | 0.00 |
| ATOM | 29728 | CG  | ASP | 1986 | 79.791 | 108.452 | 55.410 | 0.00 | 0.00 |
| ATOM | 29729 | OD1 | ASP | 1986 | 78.788 | 108.485 | 56.187 | 0.00 | 0.00 |
| ATOM | 29730 | OD2 | ASP | 1986 | 80.749 | 109.229 | 55.554 | 0.00 | 0.00 |
| ATOM | 29731 | C   | ASP | 1986 | 81.093 | 105.753 | 54.823 | 0.00 | 0.00 |
| ATOM | 29732 | O   | ASP | 1986 | 80.151 | 105.476 | 55.636 | 0.00 | 0.00 |
| ATOM | 29733 | N   | ILE | 1987 | 82.306 | 105.129 | 54.892 | 0.00 | 0.00 |
| ATOM | 29734 | H   | ILE | 1987 | 82.956 | 105.463 | 54.194 | 0.00 | 0.00 |
| ATOM | 29735 | CA  | ILE | 1987 | 82.750 | 104.004 | 55.787 | 0.00 | 0.00 |
| ATOM | 29736 | HA  | ILE | 1987 | 81.988 | 103.860 | 56.553 | 0.00 | 0.00 |
| ATOM | 29737 | CB  | ILE | 1987 | 82.896 | 102.747 | 55.016 | 0.00 | 0.00 |

|            |               |        |         |        |      |      |
|------------|---------------|--------|---------|--------|------|------|
| ATOM 29738 | HB ILE 1987   | 83.310 | 102.006 | 55.700 | 0.00 | 0.00 |
| ATOM 29739 | CG2 ILE 1987  | 81.566 | 102.238 | 54.586 | 0.00 | 0.00 |
| ATOM 29740 | 1HG2 ILE 1987 | 81.577 | 101.178 | 54.334 | 0.00 | 0.00 |
| ATOM 29741 | 2HG2 ILE 1987 | 80.916 | 102.357 | 55.453 | 0.00 | 0.00 |
| ATOM 29742 | 3HG2 ILE 1987 | 81.172 | 102.898 | 53.813 | 0.00 | 0.00 |
| ATOM 29743 | CG1 ILE 1987  | 83.876 | 102.810 | 53.784 | 0.00 | 0.00 |
| ATOM 29744 | 2HG1 ILE 1987 | 83.466 | 102.116 | 53.051 | 0.00 | 0.00 |
| ATOM 29745 | 3HG1 ILE 1987 | 83.946 | 103.818 | 53.374 | 0.00 | 0.00 |
| ATOM 29746 | CD1 ILE 1987  | 85.282 | 102.386 | 54.172 | 0.00 | 0.00 |
| ATOM 29747 | 1HD1 ILE 1987 | 85.173 | 101.520 | 54.825 | 0.00 | 0.00 |
| ATOM 29748 | 2HD1 ILE 1987 | 85.841 | 101.961 | 53.338 | 0.00 | 0.00 |
| ATOM 29749 | 3HD1 ILE 1987 | 85.912 | 103.215 | 54.493 | 0.00 | 0.00 |
| ATOM 29750 | C ILE 1987    | 84.031 | 104.300 | 56.503 | 0.00 | 0.00 |
| ATOM 29751 | O ILE 1987    | 84.716 | 105.301 | 56.236 | 0.00 | 0.00 |
| ATOM 29752 | N GLN 1988    | 84.477 | 103.461 | 57.507 | 0.00 | 0.00 |
| ATOM 29753 | H GLN 1988    | 84.054 | 102.557 | 57.661 | 0.00 | 0.00 |
| ATOM 29754 | CA GLN 1988   | 85.802 | 103.724 | 58.084 | 0.00 | 0.00 |
| ATOM 29755 | HA GLN 1988   | 86.051 | 104.782 | 57.995 | 0.00 | 0.00 |
| ATOM 29756 | CB GLN 1988   | 85.534 | 103.442 | 59.564 | 0.00 | 0.00 |
| ATOM 29757 | HB2 GLN 1988  | 84.768 | 104.142 | 59.896 | 0.00 | 0.00 |
| ATOM 29758 | HB3 GLN 1988  | 85.288 | 102.392 | 59.725 | 0.00 | 0.00 |
| ATOM 29759 | CG GLN 1988   | 86.826 | 103.724 | 60.380 | 0.00 | 0.00 |
| ATOM 29760 | HG2 GLN 1988  | 86.614 | 103.400 | 61.400 | 0.00 | 0.00 |
| ATOM 29761 | HG3 GLN 1988  | 87.600 | 103.071 | 59.977 | 0.00 | 0.00 |
| ATOM 29762 | CD GLN 1988   | 87.315 | 105.147 | 60.422 | 0.00 | 0.00 |
| ATOM 29763 | OE1 GLN 1988  | 87.960 | 105.733 | 59.544 | 0.00 | 0.00 |

|            |      |     |      |        |         |        |      |      |
|------------|------|-----|------|--------|---------|--------|------|------|
| ATOM 29764 | NE2  | GLN | 1988 | 86.835 | 105.834 | 61.446 | 0.00 | 0.00 |
| ATOM 29765 | 1HE2 | GLN | 1988 | 87.289 | 106.715 | 61.640 | 0.00 | 0.00 |
| ATOM 29766 | 2HE2 | GLN | 1988 | 86.135 | 105.470 | 62.076 | 0.00 | 0.00 |
| ATOM 29767 | C    | GLN | 1988 | 86.911 | 102.901 | 57.413 | 0.00 | 0.00 |
| ATOM 29768 | O    | GLN | 1988 | 86.651 | 101.758 | 56.979 | 0.00 | 0.00 |
| ATOM 29769 | N    | VAL | 1989 | 88.110 | 103.392 | 57.376 | 0.00 | 0.00 |
| ATOM 29770 | H    | VAL | 1989 | 88.346 | 104.067 | 58.089 | 0.00 | 0.00 |
| ATOM 29771 | CA   | VAL | 1989 | 89.278 | 102.552 | 57.040 | 0.00 | 0.00 |
| ATOM 29772 | HA   | VAL | 1989 | 88.925 | 101.611 | 56.618 | 0.00 | 0.00 |
| ATOM 29773 | CB   | VAL | 1989 | 90.213 | 103.225 | 55.992 | 0.00 | 0.00 |
| ATOM 29774 | HB   | VAL | 1989 | 90.444 | 104.186 | 56.453 | 0.00 | 0.00 |
| ATOM 29775 | CG1  | VAL | 1989 | 91.459 | 102.481 | 55.676 | 0.00 | 0.00 |
| ATOM 29776 | 1HG1 | VAL | 1989 | 92.171 | 102.374 | 56.494 | 0.00 | 0.00 |
| ATOM 29777 | 2HG1 | VAL | 1989 | 91.187 | 101.497 | 55.293 | 0.00 | 0.00 |
| ATOM 29778 | 3HG1 | VAL | 1989 | 91.978 | 103.071 | 54.921 | 0.00 | 0.00 |
| ATOM 29779 | CG2  | VAL | 1989 | 89.411 | 103.538 | 54.684 | 0.00 | 0.00 |
| ATOM 29780 | 1HG2 | VAL | 1989 | 88.797 | 102.647 | 54.546 | 0.00 | 0.00 |
| ATOM 29781 | 2HG2 | VAL | 1989 | 88.625 | 104.264 | 54.890 | 0.00 | 0.00 |
| ATOM 29782 | 3HG2 | VAL | 1989 | 90.099 | 103.818 | 53.887 | 0.00 | 0.00 |
| ATOM 29783 | C    | VAL | 1989 | 90.030 | 102.264 | 58.389 | 0.00 | 0.00 |
| ATOM 29784 | O    | VAL | 1989 | 90.097 | 103.165 | 59.287 | 0.00 | 0.00 |
| ATOM 29785 | N    | ALA | 1990 | 90.650 | 101.111 | 58.467 | 0.00 | 0.00 |
| ATOM 29786 | H    | ALA | 1990 | 90.502 | 100.535 | 57.651 | 0.00 | 0.00 |
| ATOM 29787 | CA   | ALA | 1990 | 91.343 | 100.567 | 59.645 | 0.00 | 0.00 |
| ATOM 29788 | HA   | ALA | 1990 | 91.474 | 101.431 | 60.296 | 0.00 | 0.00 |
| ATOM 29789 | CB   | ALA | 1990 | 90.329 | 99.555  | 60.299 | 0.00 | 0.00 |

|            |      |     |      |        |         |        |      |      |
|------------|------|-----|------|--------|---------|--------|------|------|
| ATOM 29790 | HB1  | ALA | 1990 | 89.308 | 99.926  | 60.204 | 0.00 | 0.00 |
| ATOM 29791 | HB2  | ALA | 1990 | 90.274 | 98.626  | 59.731 | 0.00 | 0.00 |
| ATOM 29792 | HB3  | ALA | 1990 | 90.540 | 99.305  | 61.338 | 0.00 | 0.00 |
| ATOM 29793 | C    | ALA | 1990 | 92.730 | 100.037 | 59.304 | 0.00 | 0.00 |
| ATOM 29794 | O    | ALA | 1990 | 93.009 | 99.622  | 58.165 | 0.00 | 0.00 |
| ATOM 29795 | N    | LEU | 1991 | 93.677 | 100.255 | 60.189 | 0.00 | 0.00 |
| ATOM 29796 | H    | LEU | 1991 | 93.356 | 100.866 | 60.926 | 0.00 | 0.00 |
| ATOM 29797 | CA   | LEU | 1991 | 95.143 | 100.236 | 59.975 | 0.00 | 0.00 |
| ATOM 29798 | HA   | LEU | 1991 | 95.311 | 100.024 | 58.919 | 0.00 | 0.00 |
| ATOM 29799 | CB   | LEU | 1991 | 95.768 | 101.635 | 60.213 | 0.00 | 0.00 |
| ATOM 29800 | HB2  | LEU | 1991 | 95.178 | 102.317 | 59.601 | 0.00 | 0.00 |
| ATOM 29801 | HB3  | LEU | 1991 | 95.706 | 101.778 | 61.292 | 0.00 | 0.00 |
| ATOM 29802 | CG   | LEU | 1991 | 97.255 | 101.767 | 59.827 | 0.00 | 0.00 |
| ATOM 29803 | HG   | LEU | 1991 | 97.954 | 101.158 | 60.400 | 0.00 | 0.00 |
| ATOM 29804 | CD1  | LEU | 1991 | 97.558 | 101.456 | 58.309 | 0.00 | 0.00 |
| ATOM 29805 | 1HD1 | LEU | 1991 | 96.654 | 101.911 | 57.904 | 0.00 | 0.00 |
| ATOM 29806 | 2HD1 | LEU | 1991 | 98.498 | 101.921 | 58.009 | 0.00 | 0.00 |
| ATOM 29807 | 3HD1 | LEU | 1991 | 97.592 | 100.377 | 58.161 | 0.00 | 0.00 |
| ATOM 29808 | CD2  | LEU | 1991 | 97.743 | 103.161 | 60.106 | 0.00 | 0.00 |
| ATOM 29809 | 1HD2 | LEU | 1991 | 97.748 | 103.409 | 61.167 | 0.00 | 0.00 |
| ATOM 29810 | 2HD2 | LEU | 1991 | 98.812 | 103.263 | 59.918 | 0.00 | 0.00 |
| ATOM 29811 | 3HD2 | LEU | 1991 | 97.214 | 103.821 | 59.419 | 0.00 | 0.00 |
| ATOM 29812 | C    | LEU | 1991 | 95.809 | 99.106  | 60.807 | 0.00 | 0.00 |
| ATOM 29813 | O    | LEU | 1991 | 95.971 | 99.318  | 62.002 | 0.00 | 0.00 |
| ATOM 29814 | N    | H11 | 1992 | 96.227 | 98.004  | 60.231 | 0.00 | 0.00 |
| ATOM 29815 | H    | H11 | 1992 | 95.889 | 97.855  | 59.291 | 0.00 | 0.00 |

|            |     |     |      |         |         |        |      |      |
|------------|-----|-----|------|---------|---------|--------|------|------|
| ATOM 29816 | CA  | H11 | 1992 | 97.462  | 97.348  | 60.719 | 0.00 | 0.00 |
| ATOM 29817 | HA  | H11 | 1992 | 97.798  | 97.791  | 61.657 | 0.00 | 0.00 |
| ATOM 29818 | CB  | H11 | 1992 | 97.223  | 95.842  | 61.004 | 0.00 | 0.00 |
| ATOM 29819 | HB2 | H11 | 1992 | 96.508  | 95.741  | 61.821 | 0.00 | 0.00 |
| ATOM 29820 | HB3 | H11 | 1992 | 96.760  | 95.294  | 60.183 | 0.00 | 0.00 |
| ATOM 29821 | CG  | H11 | 1992 | 98.363  | 94.984  | 61.420 | 0.00 | 0.00 |
| ATOM 29822 | ND1 | H11 | 1992 | 98.317  | 93.987  | 62.446 | 0.00 | 0.00 |
| ATOM 29823 | CE1 | H11 | 1992 | 99.551  | 93.367  | 62.390 | 0.00 | 0.00 |
| ATOM 29824 | HE1 | H11 | 1992 | 99.802  | 92.477  | 62.948 | 0.00 | 0.00 |
| ATOM 29825 | NE2 | H11 | 1992 | 100.312 | 93.883  | 61.445 | 0.00 | 0.00 |
| ATOM 29826 | HE2 | H11 | 1992 | 101.090 | 93.430  | 60.987 | 0.00 | 0.00 |
| ATOM 29827 | CD2 | H11 | 1992 | 99.635  | 94.940  | 60.880 | 0.00 | 0.00 |
| ATOM 29828 | HD2 | H11 | 1992 | 99.831  | 95.526  | 59.995 | 0.00 | 0.00 |
| ATOM 29829 | C   | H11 | 1992 | 98.529  | 97.602  | 59.671 | 0.00 | 0.00 |
| ATOM 29830 | O   | H11 | 1992 | 98.515  | 97.098  | 58.578 | 0.00 | 0.00 |
| ATOM 29831 | N   | SER | 1993 | 99.460  | 98.446  | 60.007 | 0.00 | 0.00 |
| ATOM 29832 | H   | SER | 1993 | 99.496  | 98.796  | 60.954 | 0.00 | 0.00 |
| ATOM 29833 | CA  | SER | 1993 | 100.540 | 98.849  | 59.057 | 0.00 | 0.00 |
| ATOM 29834 | HA  | SER | 1993 | 100.090 | 99.064  | 58.088 | 0.00 | 0.00 |
| ATOM 29835 | CB  | SER | 1993 | 100.948 | 100.257 | 59.528 | 0.00 | 0.00 |
| ATOM 29836 | HB2 | SER | 1993 | 101.742 | 100.623 | 58.877 | 0.00 | 0.00 |
| ATOM 29837 | HB3 | SER | 1993 | 100.195 | 101.044 | 59.504 | 0.00 | 0.00 |
| ATOM 29838 | OG  | SER | 1993 | 101.447 | 100.288 | 60.844 | 0.00 | 0.00 |
| ATOM 29839 | HG  | SER | 1993 | 100.685 | 100.277 | 61.426 | 0.00 | 0.00 |
| ATOM 29840 | C   | SER | 1993 | 101.733 | 97.876  | 58.961 | 0.00 | 0.00 |
| ATOM 29841 | O   | SER | 1993 | 101.886 | 96.963  | 59.744 | 0.00 | 0.00 |

|      |       |      |     |      |         |        |        |      |      |
|------|-------|------|-----|------|---------|--------|--------|------|------|
| ATOM | 29842 | N    | ASP | 1994 | 102.536 | 98.101 | 57.934 | 0.00 | 0.00 |
| ATOM | 29843 | H    | ASP | 1994 | 102.324 | 98.904 | 57.360 | 0.00 | 0.00 |
| ATOM | 29844 | CA   | ASP | 1994 | 103.673 | 97.236 | 57.600 | 0.00 | 0.00 |
| ATOM | 29845 | HA   | ASP | 1994 | 103.428 | 96.218 | 57.298 | 0.00 | 0.00 |
| ATOM | 29846 | CB   | ASP | 1994 | 104.321 | 97.855 | 56.334 | 0.00 | 0.00 |
| ATOM | 29847 | HB2  | ASP | 1994 | 103.817 | 97.419 | 55.471 | 0.00 | 0.00 |
| ATOM | 29848 | HB3  | ASP | 1994 | 104.135 | 98.927 | 56.406 | 0.00 | 0.00 |
| ATOM | 29849 | CG   | ASP | 1994 | 105.791 | 97.581 | 56.044 | 0.00 | 0.00 |
| ATOM | 29850 | OD1  | ASP | 1994 | 106.354 | 96.573 | 56.515 | 0.00 | 0.00 |
| ATOM | 29851 | OD2  | ASP | 1994 | 106.255 | 98.233 | 55.127 | 0.00 | 0.00 |
| ATOM | 29852 | C    | ASP | 1994 | 104.748 | 97.214 | 58.721 | 0.00 | 0.00 |
| ATOM | 29853 | O    | ASP | 1994 | 105.521 | 98.125 | 58.927 | 0.00 | 0.00 |
| ATOM | 29854 | N    | THR | 1995 | 104.800 | 96.120 | 59.500 | 0.00 | 0.00 |
| ATOM | 29855 | H    | THR | 1995 | 104.196 | 95.321 | 59.372 | 0.00 | 0.00 |
| ATOM | 29856 | CA   | THR | 1995 | 105.666 | 95.904 | 60.642 | 0.00 | 0.00 |
| ATOM | 29857 | HA   | THR | 1995 | 105.582 | 96.776 | 61.291 | 0.00 | 0.00 |
| ATOM | 29858 | CB   | THR | 1995 | 105.283 | 94.677 | 61.441 | 0.00 | 0.00 |
| ATOM | 29859 | HB   | THR | 1995 | 105.408 | 93.756 | 60.872 | 0.00 | 0.00 |
| ATOM | 29860 | CG2  | THR | 1995 | 105.909 | 94.625 | 62.850 | 0.00 | 0.00 |
| ATOM | 29861 | 1HG2 | THR | 1995 | 106.821 | 94.027 | 62.846 | 0.00 | 0.00 |
| ATOM | 29862 | 2HG2 | THR | 1995 | 106.153 | 95.606 | 63.256 | 0.00 | 0.00 |
| ATOM | 29863 | 3HG2 | THR | 1995 | 105.149 | 94.182 | 63.493 | 0.00 | 0.00 |
| ATOM | 29864 | OG1  | THR | 1995 | 103.912 | 94.737 | 61.683 | 0.00 | 0.00 |
| ATOM | 29865 | HG1  | THR | 1995 | 103.514 | 94.044 | 61.150 | 0.00 | 0.00 |
| ATOM | 29866 | C    | THR | 1995 | 107.179 | 95.832 | 60.239 | 0.00 | 0.00 |
| ATOM | 29867 | O    | THR | 1995 | 108.090 | 96.312 | 60.931 | 0.00 | 0.00 |



|            |      |     |      |         |         |        |      |      |
|------------|------|-----|------|---------|---------|--------|------|------|
| ATOM 29868 | N    | LEU | 1996 | 107.406 | 95.141  | 59.169 | 0.00 | 0.00 |
| ATOM 29869 | H    | LEU | 1996 | 106.546 | 94.915  | 58.690 | 0.00 | 0.00 |
| ATOM 29870 | CA   | LEU | 1996 | 108.699 | 94.912  | 58.540 | 0.00 | 0.00 |
| ATOM 29871 | HA   | LEU | 1996 | 109.426 | 94.741  | 59.334 | 0.00 | 0.00 |
| ATOM 29872 | CB   | LEU | 1996 | 108.715 | 93.660  | 57.659 | 0.00 | 0.00 |
| ATOM 29873 | HB2  | LEU | 1996 | 107.973 | 93.831  | 56.879 | 0.00 | 0.00 |
| ATOM 29874 | HB3  | LEU | 1996 | 109.660 | 93.581  | 57.120 | 0.00 | 0.00 |
| ATOM 29875 | CG   | LEU | 1996 | 108.389 | 92.290  | 58.380 | 0.00 | 0.00 |
| ATOM 29876 | HG   | LEU | 1996 | 107.320 | 92.326  | 58.590 | 0.00 | 0.00 |
| ATOM 29877 | CD1  | LEU | 1996 | 108.647 | 91.257  | 57.303 | 0.00 | 0.00 |
| ATOM 29878 | 1HD1 | LEU | 1996 | 108.304 | 90.335  | 57.772 | 0.00 | 0.00 |
| ATOM 29879 | 2HD1 | LEU | 1996 | 108.066 | 91.447  | 56.401 | 0.00 | 0.00 |
| ATOM 29880 | 3HD1 | LEU | 1996 | 109.725 | 91.197  | 57.151 | 0.00 | 0.00 |
| ATOM 29881 | CD2  | LEU | 1996 | 109.202 | 91.930  | 59.620 | 0.00 | 0.00 |
| ATOM 29882 | 1HD2 | LEU | 1996 | 108.891 | 92.549  | 60.461 | 0.00 | 0.00 |
| ATOM 29883 | 2HD2 | LEU | 1996 | 109.104 | 90.883  | 59.905 | 0.00 | 0.00 |
| ATOM 29884 | 3HD2 | LEU | 1996 | 110.247 | 91.993  | 59.317 | 0.00 | 0.00 |
| ATOM 29885 | C    | LEU | 1996 | 109.336 | 96.100  | 57.730 | 0.00 | 0.00 |
| ATOM 29886 | O    | LEU | 1996 | 110.500 | 96.100  | 57.374 | 0.00 | 0.00 |
| ATOM 29887 | N    | ASN | 1997 | 108.619 | 97.221  | 57.599 | 0.00 | 0.00 |
| ATOM 29888 | H    | ASN | 1997 | 107.749 | 97.196  | 58.111 | 0.00 | 0.00 |
| ATOM 29889 | CA   | ASN | 1997 | 109.079 | 98.442  | 56.927 | 0.00 | 0.00 |
| ATOM 29890 | HA   | ASN | 1997 | 108.194 | 99.069  | 56.822 | 0.00 | 0.00 |
| ATOM 29891 | CB   | ASN | 1997 | 110.047 | 99.286  | 57.739 | 0.00 | 0.00 |
| ATOM 29892 | HB2  | ASN | 1997 | 110.947 | 98.670  | 57.736 | 0.00 | 0.00 |
| ATOM 29893 | HB3  | ASN | 1997 | 110.416 | 100.179 | 57.234 | 0.00 | 0.00 |

|            |      |     |      |         |         |        |      |      |
|------------|------|-----|------|---------|---------|--------|------|------|
| ATOM 29894 | CG   | ASN | 1997 | 109.700 | 99.485  | 59.226 | 0.00 | 0.00 |
| ATOM 29895 | OD1  | ASN | 1997 | 108.544 | 99.770  | 59.541 | 0.00 | 0.00 |
| ATOM 29896 | ND2  | ASN | 1997 | 110.678 | 99.802  | 60.029 | 0.00 | 0.00 |
| ATOM 29897 | 1HD2 | ASN | 1997 | 110.414 | 100.017 | 60.980 | 0.00 | 0.00 |
| ATOM 29898 | 2HD2 | ASN | 1997 | 111.557 | 99.366  | 59.791 | 0.00 | 0.00 |
| ATOM 29899 | C    | ASN | 1997 | 109.548 | 98.145  | 55.543 | 0.00 | 0.00 |
| ATOM 29900 | O    | ASN | 1997 | 110.436 | 98.870  | 55.061 | 0.00 | 0.00 |
| ATOM 29901 | N    | GLU | 1998 | 108.902 | 97.173  | 54.838 | 0.00 | 0.00 |
| ATOM 29902 | H    | GLU | 1998 | 108.191 | 96.664  | 55.344 | 0.00 | 0.00 |
| ATOM 29903 | CA   | GLU | 1998 | 109.079 | 96.744  | 53.454 | 0.00 | 0.00 |
| ATOM 29904 | HA   | GLU | 1998 | 110.111 | 96.437  | 53.288 | 0.00 | 0.00 |
| ATOM 29905 | CB   | GLU | 1998 | 108.252 | 95.464  | 53.200 | 0.00 | 0.00 |
| ATOM 29906 | HB2  | GLU | 1998 | 108.590 | 94.641  | 53.830 | 0.00 | 0.00 |
| ATOM 29907 | HB3  | GLU | 1998 | 107.268 | 95.776  | 53.551 | 0.00 | 0.00 |
| ATOM 29908 | CG   | GLU | 1998 | 108.069 | 94.931  | 51.779 | 0.00 | 0.00 |
| ATOM 29909 | HG2  | GLU | 1998 | 107.397 | 95.625  | 51.274 | 0.00 | 0.00 |
| ATOM 29910 | HG3  | GLU | 1998 | 109.025 | 94.879  | 51.257 | 0.00 | 0.00 |
| ATOM 29911 | CD   | GLU | 1998 | 107.499 | 93.567  | 51.824 | 0.00 | 0.00 |
| ATOM 29912 | OE1  | GLU | 1998 | 108.303 | 92.656  | 51.966 | 0.00 | 0.00 |
| ATOM 29913 | OE2  | GLU | 1998 | 106.307 | 93.339  | 51.705 | 0.00 | 0.00 |
| ATOM 29914 | C    | GLU | 1998 | 108.789 | 97.903  | 52.491 | 0.00 | 0.00 |
| ATOM 29915 | O    | GLU | 1998 | 109.583 | 98.161  | 51.609 | 0.00 | 0.00 |
| ATOM 29916 | N    | SER | 1999 | 107.689 | 98.591  | 52.737 | 0.00 | 0.00 |
| ATOM 29917 | H    | SER | 1999 | 107.157 | 98.480  | 53.588 | 0.00 | 0.00 |
| ATOM 29918 | CA   | SER | 1999 | 107.058 | 99.576  | 51.861 | 0.00 | 0.00 |
| ATOM 29919 | HA   | SER | 1999 | 107.330 | 99.349  | 50.830 | 0.00 | 0.00 |

|      |       |     |     |      |         |         |        |      |      |
|------|-------|-----|-----|------|---------|---------|--------|------|------|
| ATOM | 29920 | CB  | SER | 1999 | 105.580 | 99.528  | 51.991 | 0.00 | 0.00 |
| ATOM | 29921 | HB2 | SER | 1999 | 105.146 | 100.310 | 51.368 | 0.00 | 0.00 |
| ATOM | 29922 | HB3 | SER | 1999 | 105.215 | 98.525  | 51.766 | 0.00 | 0.00 |
| ATOM | 29923 | OG  | SER | 1999 | 105.111 | 99.869  | 53.333 | 0.00 | 0.00 |
| ATOM | 29924 | HG  | SER | 1999 | 105.461 | 99.236  | 53.964 | 0.00 | 0.00 |
| ATOM | 29925 | C   | SER | 1999 | 107.516 | 101.017 | 52.091 | 0.00 | 0.00 |
| ATOM | 29926 | O   | SER | 1999 | 107.539 | 101.807 | 51.196 | 0.00 | 0.00 |
| ATOM | 29927 | N   | GLY | 2000 | 107.802 | 101.336 | 53.317 | 0.00 | 0.00 |
| ATOM | 29928 | H   | GLY | 2000 | 107.881 | 100.627 | 54.032 | 0.00 | 0.00 |
| ATOM | 29929 | CA  | GLY | 2000 | 108.021 | 102.642 | 53.867 | 0.00 | 0.00 |
| ATOM | 29930 | HA2 | GLY | 2000 | 108.928 | 103.093 | 53.462 | 0.00 | 0.00 |
| ATOM | 29931 | HA3 | GLY | 2000 | 107.189 | 103.300 | 53.618 | 0.00 | 0.00 |
| ATOM | 29932 | C   | GLY | 2000 | 108.116 | 102.566 | 55.415 | 0.00 | 0.00 |
| ATOM | 29933 | O   | GLY | 2000 | 108.023 | 101.464 | 55.958 | 0.00 | 0.00 |
| ATOM | 29934 | N   | PHE | 2001 | 108.301 | 103.706 | 56.032 | 0.00 | 0.00 |
| ATOM | 29935 | H   | PHE | 2001 | 108.441 | 104.530 | 55.465 | 0.00 | 0.00 |
| ATOM | 29936 | CA  | PHE | 2001 | 108.226 | 103.893 | 57.479 | 0.00 | 0.00 |
| ATOM | 29937 | HA  | PHE | 2001 | 108.193 | 102.913 | 57.954 | 0.00 | 0.00 |
| ATOM | 29938 | CB  | PHE | 2001 | 109.499 | 104.660 | 57.810 | 0.00 | 0.00 |
| ATOM | 29939 | HB2 | PHE | 2001 | 109.501 | 105.605 | 57.267 | 0.00 | 0.00 |
| ATOM | 29940 | HB3 | PHE | 2001 | 109.364 | 104.937 | 58.855 | 0.00 | 0.00 |
| ATOM | 29941 | CG  | PHE | 2001 | 110.869 | 104.011 | 57.688 | 0.00 | 0.00 |
| ATOM | 29942 | CD1 | PHE | 2001 | 111.918 | 104.840 | 57.179 | 0.00 | 0.00 |
| ATOM | 29943 | HD1 | PHE | 2001 | 111.816 | 105.873 | 56.878 | 0.00 | 0.00 |
| ATOM | 29944 | CE1 | PHE | 2001 | 113.195 | 104.339 | 57.187 | 0.00 | 0.00 |
| ATOM | 29945 | HE1 | PHE | 2001 | 114.003 | 104.845 | 56.680 | 0.00 | 0.00 |

|            |      |     |      |         |         |        |      |      |
|------------|------|-----|------|---------|---------|--------|------|------|
| ATOM 29946 | CZ   | PHE | 2001 | 113.479 | 103.013 | 57.557 | 0.00 | 0.00 |
| ATOM 29947 | HZ   | PHE | 2001 | 114.477 | 102.610 | 57.470 | 0.00 | 0.00 |
| ATOM 29948 | CE2  | PHE | 2001 | 112.463 | 102.205 | 58.064 | 0.00 | 0.00 |
| ATOM 29949 | HE2  | PHE | 2001 | 112.610 | 101.180 | 58.372 | 0.00 | 0.00 |
| ATOM 29950 | CD2  | PHE | 2001 | 111.185 | 102.741 | 58.145 | 0.00 | 0.00 |
| ATOM 29951 | HD2  | PHE | 2001 | 110.448 | 102.144 | 58.659 | 0.00 | 0.00 |
| ATOM 29952 | C    | PHE | 2001 | 106.888 | 104.599 | 57.839 | 0.00 | 0.00 |
| ATOM 29953 | O    | PHE | 2001 | 106.139 | 105.002 | 56.916 | 0.00 | 0.00 |
| ATOM 29954 | N    | VAL | 2002 | 106.549 | 104.724 | 59.136 | 0.00 | 0.00 |
| ATOM 29955 | H    | VAL | 2002 | 107.132 | 104.376 | 59.884 | 0.00 | 0.00 |
| ATOM 29956 | CA   | VAL | 2002 | 105.242 | 105.296 | 59.573 | 0.00 | 0.00 |
| ATOM 29957 | HA   | VAL | 2002 | 104.390 | 104.728 | 59.200 | 0.00 | 0.00 |
| ATOM 29958 | CB   | VAL | 2002 | 105.133 | 105.400 | 61.101 | 0.00 | 0.00 |
| ATOM 29959 | HB   | VAL | 2002 | 105.192 | 104.420 | 61.574 | 0.00 | 0.00 |
| ATOM 29960 | CG1  | VAL | 2002 | 106.195 | 106.221 | 61.780 | 0.00 | 0.00 |
| ATOM 29961 | 1HG1 | VAL | 2002 | 106.416 | 105.905 | 62.800 | 0.00 | 0.00 |
| ATOM 29962 | 2HG1 | VAL | 2002 | 107.156 | 105.966 | 61.335 | 0.00 | 0.00 |
| ATOM 29963 | 3HG1 | VAL | 2002 | 105.997 | 107.289 | 61.685 | 0.00 | 0.00 |
| ATOM 29964 | CG2  | VAL | 2002 | 103.809 | 106.066 | 61.546 | 0.00 | 0.00 |
| ATOM 29965 | 1HG2 | VAL | 2002 | 103.714 | 106.005 | 62.630 | 0.00 | 0.00 |
| ATOM 29966 | 2HG2 | VAL | 2002 | 103.821 | 107.124 | 61.286 | 0.00 | 0.00 |
| ATOM 29967 | 3HG2 | VAL | 2002 | 103.017 | 105.484 | 61.075 | 0.00 | 0.00 |
| ATOM 29968 | C    | VAL | 2002 | 105.100 | 106.722 | 58.993 | 0.00 | 0.00 |
| ATOM 29969 | O    | VAL | 2002 | 103.997 | 106.932 | 58.438 | 0.00 | 0.00 |
| ATOM 29970 | N    | GLU | 2003 | 106.087 | 107.614 | 59.007 | 0.00 | 0.00 |
| ATOM 29971 | H    | GLU | 2003 | 106.938 | 107.399 | 59.507 | 0.00 | 0.00 |

|      |       |     |     |      |         |         |        |      |      |
|------|-------|-----|-----|------|---------|---------|--------|------|------|
| ATOM | 29972 | CA  | GLU | 2003 | 105.828 | 108.904 | 58.389 | 0.00 | 0.00 |
| ATOM | 29973 | HA  | GLU | 2003 | 104.988 | 109.297 | 58.961 | 0.00 | 0.00 |
| ATOM | 29974 | CB  | GLU | 2003 | 106.972 | 109.970 | 58.554 | 0.00 | 0.00 |
| ATOM | 29975 | HB2 | GLU | 2003 | 106.770 | 110.842 | 57.932 | 0.00 | 0.00 |
| ATOM | 29976 | HB3 | GLU | 2003 | 106.923 | 110.271 | 59.600 | 0.00 | 0.00 |
| ATOM | 29977 | CG  | GLU | 2003 | 108.338 | 109.597 | 58.209 | 0.00 | 0.00 |
| ATOM | 29978 | HG2 | GLU | 2003 | 108.308 | 108.891 | 57.379 | 0.00 | 0.00 |
| ATOM | 29979 | HG3 | GLU | 2003 | 108.975 | 110.420 | 57.883 | 0.00 | 0.00 |
| ATOM | 29980 | CD  | GLU | 2003 | 109.105 | 109.042 | 59.426 | 0.00 | 0.00 |
| ATOM | 29981 | OE1 | GLU | 2003 | 110.281 | 109.461 | 59.579 | 0.00 | 0.00 |
| ATOM | 29982 | OE2 | GLU | 2003 | 108.605 | 108.156 | 60.142 | 0.00 | 0.00 |
| ATOM | 29983 | C   | GLU | 2003 | 105.322 | 108.881 | 56.941 | 0.00 | 0.00 |
| ATOM | 29984 | O   | GLU | 2003 | 104.492 | 109.724 | 56.657 | 0.00 | 0.00 |
| ATOM | 29985 | N   | ASP | 2004 | 105.687 | 107.910 | 56.116 | 0.00 | 0.00 |
| ATOM | 29986 | H   | ASP | 2004 | 106.180 | 107.104 | 56.475 | 0.00 | 0.00 |
| ATOM | 29987 | CA  | ASP | 2004 | 105.304 | 107.829 | 54.704 | 0.00 | 0.00 |
| ATOM | 29988 | HA  | ASP | 2004 | 105.211 | 108.832 | 54.289 | 0.00 | 0.00 |
| ATOM | 29989 | CB  | ASP | 2004 | 106.343 | 107.062 | 53.869 | 0.00 | 0.00 |
| ATOM | 29990 | HB2 | ASP | 2004 | 107.261 | 107.636 | 54.002 | 0.00 | 0.00 |
| ATOM | 29991 | HB3 | ASP | 2004 | 106.567 | 106.100 | 54.330 | 0.00 | 0.00 |
| ATOM | 29992 | CG  | ASP | 2004 | 106.015 | 106.896 | 52.430 | 0.00 | 0.00 |
| ATOM | 29993 | OD1 | ASP | 2004 | 105.303 | 105.936 | 52.136 | 0.00 | 0.00 |
| ATOM | 29994 | OD2 | ASP | 2004 | 106.603 | 107.576 | 51.535 | 0.00 | 0.00 |
| ATOM | 29995 | C   | ASP | 2004 | 103.914 | 107.243 | 54.613 | 0.00 | 0.00 |
| ATOM | 29996 | O   | ASP | 2004 | 103.206 | 107.572 | 53.735 | 0.00 | 0.00 |
| ATOM | 29997 | N   | THR | 2005 | 103.322 | 106.624 | 55.664 | 0.00 | 0.00 |

|            |      |     |      |         |         |        |      |      |
|------------|------|-----|------|---------|---------|--------|------|------|
| ATOM 29998 | H    | THR | 2005 | 103.867 | 106.500 | 56.505 | 0.00 | 0.00 |
| ATOM 29999 | CA   | THR | 2005 | 101.894 | 106.293 | 55.811 | 0.00 | 0.00 |
| ATOM 30000 | HA   | THR | 2005 | 101.471 | 105.957 | 54.864 | 0.00 | 0.00 |
| ATOM 30001 | CB   | THR | 2005 | 101.891 | 105.072 | 56.871 | 0.00 | 0.00 |
| ATOM 30002 | HB   | THR | 2005 | 102.277 | 105.392 | 57.839 | 0.00 | 0.00 |
| ATOM 30003 | CG2  | THR | 2005 | 100.555 | 104.362 | 57.111 | 0.00 | 0.00 |
| ATOM 30004 | 1HG2 | THR | 2005 | 99.676  | 104.966 | 57.336 | 0.00 | 0.00 |
| ATOM 30005 | 2HG2 | THR | 2005 | 100.118 | 103.786 | 56.295 | 0.00 | 0.00 |
| ATOM 30006 | 3HG2 | THR | 2005 | 100.573 | 103.655 | 57.941 | 0.00 | 0.00 |
| ATOM 30007 | OG1  | THR | 2005 | 102.759 | 104.048 | 56.431 | 0.00 | 0.00 |
| ATOM 30008 | HG1  | THR | 2005 | 103.527 | 104.470 | 56.038 | 0.00 | 0.00 |
| ATOM 30009 | C    | THR | 2005 | 101.073 | 107.435 | 56.328 | 0.00 | 0.00 |
| ATOM 30010 | O    | THR | 2005 | 99.907  | 107.462 | 55.919 | 0.00 | 0.00 |
| ATOM 30011 | N    | LEU | 2006 | 101.700 | 108.371 | 57.151 | 0.00 | 0.00 |
| ATOM 30012 | H    | LEU | 2006 | 102.647 | 108.242 | 57.478 | 0.00 | 0.00 |
| ATOM 30013 | CA   | LEU | 2006 | 100.890 | 109.528 | 57.525 | 0.00 | 0.00 |
| ATOM 30014 | HA   | LEU | 2006 | 99.877  | 109.234 | 57.801 | 0.00 | 0.00 |
| ATOM 30015 | CB   | LEU | 2006 | 101.485 | 110.205 | 58.814 | 0.00 | 0.00 |
| ATOM 30016 | HB2  | LEU | 2006 | 102.421 | 110.681 | 58.523 | 0.00 | 0.00 |
| ATOM 30017 | HB3  | LEU | 2006 | 100.804 | 111.005 | 59.104 | 0.00 | 0.00 |
| ATOM 30018 | CG   | LEU | 2006 | 101.780 | 109.357 | 60.092 | 0.00 | 0.00 |
| ATOM 30019 | HG   | LEU | 2006 | 102.376 | 108.470 | 59.877 | 0.00 | 0.00 |
| ATOM 30020 | CD1  | LEU | 2006 | 102.746 | 110.095 | 61.044 | 0.00 | 0.00 |
| ATOM 30021 | 1HD1 | LEU | 2006 | 103.743 | 110.134 | 60.605 | 0.00 | 0.00 |
| ATOM 30022 | 2HD1 | LEU | 2006 | 102.475 | 111.093 | 61.389 | 0.00 | 0.00 |
| ATOM 30023 | 3HD1 | LEU | 2006 | 102.868 | 109.434 | 61.903 | 0.00 | 0.00 |

|            |      |     |      |         |         |        |      |      |
|------------|------|-----|------|---------|---------|--------|------|------|
| ATOM 30024 | CD2  | LEU | 2006 | 100.465 | 108.969 | 60.785 | 0.00 | 0.00 |
| ATOM 30025 | 1HD2 | LEU | 2006 | 99.885  | 109.862 | 61.015 | 0.00 | 0.00 |
| ATOM 30026 | 2HD2 | LEU | 2006 | 99.962  | 108.239 | 60.151 | 0.00 | 0.00 |
| ATOM 30027 | 3HD2 | LEU | 2006 | 100.712 | 108.538 | 61.755 | 0.00 | 0.00 |
| ATOM 30028 | C    | LEU | 2006 | 100.777 | 110.538 | 56.393 | 0.00 | 0.00 |
| ATOM 30029 | O    | LEU | 2006 | 99.664  | 111.021 | 56.185 | 0.00 | 0.00 |
| ATOM 30030 | N    | ALA | 2007 | 101.815 | 110.696 | 55.543 | 0.00 | 0.00 |
| ATOM 30031 | H    | ALA | 2007 | 102.720 | 110.304 | 55.762 | 0.00 | 0.00 |
| ATOM 30032 | CA   | ALA | 2007 | 101.778 | 111.358 | 54.270 | 0.00 | 0.00 |
| ATOM 30033 | HA   | ALA | 2007 | 101.317 | 112.312 | 54.527 | 0.00 | 0.00 |
| ATOM 30034 | CB   | ALA | 2007 | 103.266 | 111.484 | 53.875 | 0.00 | 0.00 |
| ATOM 30035 | HB1  | ALA | 2007 | 103.843 | 110.568 | 54.000 | 0.00 | 0.00 |
| ATOM 30036 | HB2  | ALA | 2007 | 103.508 | 111.794 | 52.858 | 0.00 | 0.00 |
| ATOM 30037 | HB3  | ALA | 2007 | 103.817 | 112.075 | 54.606 | 0.00 | 0.00 |
| ATOM 30038 | C    | ALA | 2007 | 100.835 | 110.691 | 53.131 | 0.00 | 0.00 |
| ATOM 30039 | O    | ALA | 2007 | 100.022 | 111.407 | 52.677 | 0.00 | 0.00 |
| ATOM 30040 | N    | ALA | 2008 | 100.876 | 109.366 | 52.983 | 0.00 | 0.00 |
| ATOM 30041 | H    | ALA | 2008 | 101.550 | 108.906 | 53.578 | 0.00 | 0.00 |
| ATOM 30042 | CA   | ALA | 2008 | 99.805  | 108.555 | 52.325 | 0.00 | 0.00 |
| ATOM 30043 | HA   | ALA | 2008 | 99.886  | 108.848 | 51.278 | 0.00 | 0.00 |
| ATOM 30044 | CB   | ALA | 2008 | 100.010 | 107.044 | 52.406 | 0.00 | 0.00 |
| ATOM 30045 | HB1  | ALA | 2008 | 100.866 | 106.759 | 51.795 | 0.00 | 0.00 |
| ATOM 30046 | HB2  | ALA | 2008 | 100.026 | 106.690 | 53.437 | 0.00 | 0.00 |
| ATOM 30047 | HB3  | ALA | 2008 | 99.149  | 106.637 | 51.876 | 0.00 | 0.00 |
| ATOM 30048 | C    | ALA | 2008 | 98.369  | 108.860 | 52.848 | 0.00 | 0.00 |
| ATOM 30049 | O    | ALA | 2008 | 97.474  | 109.102 | 52.066 | 0.00 | 0.00 |

|            |      |     |      |        |         |        |      |      |
|------------|------|-----|------|--------|---------|--------|------|------|
| ATOM 30050 | N    | ILE | 2009 | 98.118 | 108.782 | 54.148 | 0.00 | 0.00 |
| ATOM 30051 | H    | ILE | 2009 | 98.869 | 108.439 | 54.730 | 0.00 | 0.00 |
| ATOM 30052 | CA   | ILE | 2009 | 96.820 | 109.035 | 54.715 | 0.00 | 0.00 |
| ATOM 30053 | HA   | ILE | 2009 | 96.128 | 108.329 | 54.254 | 0.00 | 0.00 |
| ATOM 30054 | CB   | ILE | 2009 | 96.864 | 108.658 | 56.236 | 0.00 | 0.00 |
| ATOM 30055 | HB   | ILE | 2009 | 97.704 | 109.202 | 56.667 | 0.00 | 0.00 |
| ATOM 30056 | CG2  | ILE | 2009 | 95.583 | 109.197 | 56.883 | 0.00 | 0.00 |
| ATOM 30057 | 1HG2 | ILE | 2009 | 94.765 | 108.737 | 56.328 | 0.00 | 0.00 |
| ATOM 30058 | 2HG2 | ILE | 2009 | 95.544 | 108.812 | 57.902 | 0.00 | 0.00 |
| ATOM 30059 | 3HG2 | ILE | 2009 | 95.511 | 110.273 | 57.041 | 0.00 | 0.00 |
| ATOM 30060 | CG1  | ILE | 2009 | 97.011 | 107.228 | 56.539 | 0.00 | 0.00 |
| ATOM 30061 | 2HG1 | ILE | 2009 | 96.149 | 106.603 | 56.307 | 0.00 | 0.00 |
| ATOM 30062 | 3HG1 | ILE | 2009 | 97.750 | 106.764 | 55.886 | 0.00 | 0.00 |
| ATOM 30063 | CD1  | ILE | 2009 | 97.541 | 106.924 | 57.991 | 0.00 | 0.00 |
| ATOM 30064 | 1HD1 | ILE | 2009 | 96.857 | 107.320 | 58.742 | 0.00 | 0.00 |
| ATOM 30065 | 2HD1 | ILE | 2009 | 97.746 | 105.859 | 58.095 | 0.00 | 0.00 |
| ATOM 30066 | 3HD1 | ILE | 2009 | 98.499 | 107.429 | 58.110 | 0.00 | 0.00 |
| ATOM 30067 | C    | ILE | 2009 | 96.397 | 110.462 | 54.437 | 0.00 | 0.00 |
| ATOM 30068 | O    | ILE | 2009 | 95.264 | 110.720 | 54.070 | 0.00 | 0.00 |
| ATOM 30069 | N    | GLY | 2010 | 97.341 | 111.420 | 54.419 | 0.00 | 0.00 |
| ATOM 30070 | H    | GLY | 2010 | 98.273 | 111.137 | 54.685 | 0.00 | 0.00 |
| ATOM 30071 | CA   | GLY | 2010 | 97.213 | 112.760 | 53.838 | 0.00 | 0.00 |
| ATOM 30072 | HA2  | GLY | 2010 | 98.154 | 113.298 | 53.948 | 0.00 | 0.00 |
| ATOM 30073 | HA3  | GLY | 2010 | 96.840 | 112.698 | 52.815 | 0.00 | 0.00 |
| ATOM 30074 | C    | GLY | 2010 | 96.229 | 113.581 | 54.579 | 0.00 | 0.00 |
| ATOM 30075 | O    | GLY | 2010 | 95.645 | 114.433 | 53.994 | 0.00 | 0.00 |



|            |      |     |      |        |         |        |      |      |
|------------|------|-----|------|--------|---------|--------|------|------|
| ATOM 30076 | N    | GLY | 2011 | 96.022 | 113.281 | 55.880 | 0.00 | 0.00 |
| ATOM 30077 | H    | GLY | 2011 | 96.634 | 112.562 | 56.238 | 0.00 | 0.00 |
| ATOM 30078 | CA   | GLY | 2011 | 95.259 | 113.903 | 56.880 | 0.00 | 0.00 |
| ATOM 30079 | HA2  | GLY | 2011 | 95.741 | 113.627 | 57.817 | 0.00 | 0.00 |
| ATOM 30080 | HA3  | GLY | 2011 | 95.276 | 114.980 | 56.711 | 0.00 | 0.00 |
| ATOM 30081 | C    | GLY | 2011 | 93.749 | 113.453 | 56.938 | 0.00 | 0.00 |
| ATOM 30082 | O    | GLY | 2011 | 92.965 | 114.120 | 57.649 | 0.00 | 0.00 |
| ATOM 30083 | N    | ARG | 2012 | 93.293 | 112.463 | 56.172 | 0.00 | 0.00 |
| ATOM 30084 | H    | ARG | 2012 | 93.965 | 112.066 | 55.531 | 0.00 | 0.00 |
| ATOM 30085 | CA   | ARG | 2012 | 91.944 | 111.860 | 56.029 | 0.00 | 0.00 |
| ATOM 30086 | HA   | ARG | 2012 | 91.220 | 112.673 | 55.978 | 0.00 | 0.00 |
| ATOM 30087 | CB   | ARG | 2012 | 91.797 | 111.150 | 54.661 | 0.00 | 0.00 |
| ATOM 30088 | HB2  | ARG | 2012 | 92.661 | 110.489 | 54.593 | 0.00 | 0.00 |
| ATOM 30089 | HB3  | ARG | 2012 | 90.910 | 110.518 | 54.697 | 0.00 | 0.00 |
| ATOM 30090 | CG   | ARG | 2012 | 91.913 | 112.126 | 53.535 | 0.00 | 0.00 |
| ATOM 30091 | HG2  | ARG | 2012 | 90.975 | 112.682 | 53.534 | 0.00 | 0.00 |
| ATOM 30092 | HG3  | ARG | 2012 | 92.780 | 112.773 | 53.667 | 0.00 | 0.00 |
| ATOM 30093 | CD   | ARG | 2012 | 92.121 | 111.455 | 52.162 | 0.00 | 0.00 |
| ATOM 30094 | HD2  | ARG | 2012 | 91.343 | 110.699 | 52.058 | 0.00 | 0.00 |
| ATOM 30095 | HD3  | ARG | 2012 | 91.880 | 112.256 | 51.463 | 0.00 | 0.00 |
| ATOM 30096 | NE   | ARG | 2012 | 93.392 | 110.775 | 51.884 | 0.00 | 0.00 |
| ATOM 30097 | HE   | ARG | 2012 | 94.064 | 110.685 | 52.632 | 0.00 | 0.00 |
| ATOM 30098 | CZ   | ARG | 2012 | 93.812 | 110.268 | 50.766 | 0.00 | 0.00 |
| ATOM 30099 | NH1  | ARG | 2012 | 92.862 | 110.170 | 49.879 | 0.00 | 0.00 |
| ATOM 30100 | 1HH1 | ARG | 2012 | 93.104 | 109.774 | 48.981 | 0.00 | 0.00 |
| ATOM 30101 | 2HH1 | ARG | 2012 | 91.941 | 110.525 | 50.092 | 0.00 | 0.00 |

|            |      |     |      |        |         |        |      |      |
|------------|------|-----|------|--------|---------|--------|------|------|
| ATOM 30102 | NH2  | ARG | 2012 | 95.010 | 109.792 | 50.527 | 0.00 | 0.00 |
| ATOM 30103 | 1HH2 | ARG | 2012 | 95.103 | 109.262 | 49.673 | 0.00 | 0.00 |
| ATOM 30104 | 2HH2 | ARG | 2012 | 95.669 | 109.704 | 51.287 | 0.00 | 0.00 |
| ATOM 30105 | C    | ARG | 2012 | 91.681 | 110.980 | 57.238 | 0.00 | 0.00 |
| ATOM 30106 | O    | ARG | 2012 | 92.559 | 110.677 | 58.032 | 0.00 | 0.00 |
| ATOM 30107 | N    | THR | 2013 | 90.465 | 110.661 | 57.541 | 0.00 | 0.00 |
| ATOM 30108 | H    | THR | 2013 | 89.686 | 110.976 | 56.980 | 0.00 | 0.00 |
| ATOM 30109 | CA   | THR | 2013 | 90.080 | 109.993 | 58.799 | 0.00 | 0.00 |
| ATOM 30110 | HA   | THR | 2013 | 90.580 | 110.523 | 59.609 | 0.00 | 0.00 |
| ATOM 30111 | CB   | THR | 2013 | 88.621 | 110.320 | 59.129 | 0.00 | 0.00 |
| ATOM 30112 | HB   | THR | 2013 | 88.022 | 109.913 | 58.315 | 0.00 | 0.00 |
| ATOM 30113 | CG2  | THR | 2013 | 88.110 | 109.796 | 60.433 | 0.00 | 0.00 |
| ATOM 30114 | 1HG2 | THR | 2013 | 88.632 | 110.148 | 61.323 | 0.00 | 0.00 |
| ATOM 30115 | 2HG2 | THR | 2013 | 87.071 | 110.122 | 60.490 | 0.00 | 0.00 |
| ATOM 30116 | 3HG2 | THR | 2013 | 88.075 | 108.708 | 60.479 | 0.00 | 0.00 |
| ATOM 30117 | OG1  | THR | 2013 | 88.434 | 111.725 | 59.160 | 0.00 | 0.00 |
| ATOM 30118 | HG1  | THR | 2013 | 87.484 | 111.798 | 59.043 | 0.00 | 0.00 |
| ATOM 30119 | C    | THR | 2013 | 90.466 | 108.468 | 58.737 | 0.00 | 0.00 |
| ATOM 30120 | O    | THR | 2013 | 90.178 | 107.733 | 57.807 | 0.00 | 0.00 |
| ATOM 30121 | N    | ILE | 2014 | 91.123 | 107.980 | 59.759 | 0.00 | 0.00 |
| ATOM 30122 | H    | ILE | 2014 | 91.523 | 108.579 | 60.467 | 0.00 | 0.00 |
| ATOM 30123 | CA   | ILE | 2014 | 91.539 | 106.591 | 59.913 | 0.00 | 0.00 |
| ATOM 30124 | HA   | ILE | 2014 | 90.702 | 105.999 | 59.541 | 0.00 | 0.00 |
| ATOM 30125 | CB   | ILE | 2014 | 92.734 | 106.310 | 59.067 | 0.00 | 0.00 |
| ATOM 30126 | HB   | ILE | 2014 | 92.562 | 106.786 | 58.102 | 0.00 | 0.00 |
| ATOM 30127 | CG2  | ILE | 2014 | 93.992 | 106.896 | 59.631 | 0.00 | 0.00 |

|            |      |     |      |        |         |        |      |      |
|------------|------|-----|------|--------|---------|--------|------|------|
| ATOM 30128 | 1HG2 | ILE | 2014 | 94.111 | 106.716 | 60.700 | 0.00 | 0.00 |
| ATOM 30129 | 2HG2 | ILE | 2014 | 94.866 | 106.527 | 59.095 | 0.00 | 0.00 |
| ATOM 30130 | 3HG2 | ILE | 2014 | 93.937 | 107.985 | 59.626 | 0.00 | 0.00 |
| ATOM 30131 | CG1  | ILE | 2014 | 92.851 | 104.831 | 58.773 | 0.00 | 0.00 |
| ATOM 30132 | 2HG1 | ILE | 2014 | 93.021 | 104.343 | 59.733 | 0.00 | 0.00 |
| ATOM 30133 | 3HG1 | ILE | 2014 | 91.967 | 104.475 | 58.244 | 0.00 | 0.00 |
| ATOM 30134 | CD1  | ILE | 2014 | 94.040 | 104.492 | 57.846 | 0.00 | 0.00 |
| ATOM 30135 | 1HD1 | ILE | 2014 | 93.969 | 105.115 | 56.955 | 0.00 | 0.00 |
| ATOM 30136 | 2HD1 | ILE | 2014 | 95.045 | 104.505 | 58.268 | 0.00 | 0.00 |
| ATOM 30137 | 3HD1 | ILE | 2014 | 93.871 | 103.477 | 57.486 | 0.00 | 0.00 |
| ATOM 30138 | C    | ILE | 2014 | 91.656 | 106.015 | 61.339 | 0.00 | 0.00 |
| ATOM 30139 | O    | ILE | 2014 | 92.063 | 106.647 | 62.317 | 0.00 | 0.00 |
| ATOM 30140 | N    | HID | 2015 | 91.177 | 104.789 | 61.493 | 0.00 | 0.00 |
| ATOM 30141 | H    | HID | 2015 | 90.734 | 104.269 | 60.749 | 0.00 | 0.00 |
| ATOM 30142 | CA   | HID | 2015 | 91.232 | 104.104 | 62.793 | 0.00 | 0.00 |
| ATOM 30143 | HA   | HID | 2015 | 91.261 | 104.869 | 63.569 | 0.00 | 0.00 |
| ATOM 30144 | CB   | HID | 2015 | 89.917 | 103.227 | 62.806 | 0.00 | 0.00 |
| ATOM 30145 | HB2  | HID | 2015 | 89.075 | 103.920 | 62.796 | 0.00 | 0.00 |
| ATOM 30146 | HB3  | HID | 2015 | 89.899 | 102.663 | 61.873 | 0.00 | 0.00 |
| ATOM 30147 | CG   | HID | 2015 | 89.834 | 102.241 | 64.024 | 0.00 | 0.00 |
| ATOM 30148 | ND1  | HID | 2015 | 90.406 | 102.394 | 65.302 | 0.00 | 0.00 |
| ATOM 30149 | HD1  | HID | 2015 | 91.071 | 103.063 | 65.664 | 0.00 | 0.00 |
| ATOM 30150 | CE1  | HID | 2015 | 90.109 | 101.303 | 65.993 | 0.00 | 0.00 |
| ATOM 30151 | HE1  | HID | 2015 | 90.539 | 101.105 | 66.964 | 0.00 | 0.00 |
| ATOM 30152 | NE2  | HID | 2015 | 89.135 | 100.590 | 65.458 | 0.00 | 0.00 |
| ATOM 30153 | CD2  | HID | 2015 | 88.953 | 101.163 | 64.161 | 0.00 | 0.00 |

|            |      |     |      |        |         |        |      |      |
|------------|------|-----|------|--------|---------|--------|------|------|
| ATOM 30154 | HD2  | HID | 2015 | 88.289 | 100.938 | 63.339 | 0.00 | 0.00 |
| ATOM 30155 | C    | HID | 2015 | 92.547 | 103.186 | 62.924 | 0.00 | 0.00 |
| ATOM 30156 | O    | HID | 2015 | 92.670 | 102.131 | 62.311 | 0.00 | 0.00 |
| ATOM 30157 | N    | THR | 2016 | 93.415 | 103.616 | 63.794 | 0.00 | 0.00 |
| ATOM 30158 | H    | THR | 2016 | 93.192 | 104.399 | 64.392 | 0.00 | 0.00 |
| ATOM 30159 | CA   | THR | 2016 | 94.605 | 102.776 | 64.083 | 0.00 | 0.00 |
| ATOM 30160 | HA   | THR | 2016 | 94.873 | 102.255 | 63.164 | 0.00 | 0.00 |
| ATOM 30161 | CB   | THR | 2016 | 95.909 | 103.449 | 64.344 | 0.00 | 0.00 |
| ATOM 30162 | HB   | THR | 2016 | 95.890 | 103.921 | 65.327 | 0.00 | 0.00 |
| ATOM 30163 | CG2  | THR | 2016 | 97.052 | 102.456 | 64.336 | 0.00 | 0.00 |
| ATOM 30164 | 1HG2 | THR | 2016 | 97.957 | 103.041 | 64.500 | 0.00 | 0.00 |
| ATOM 30165 | 2HG2 | THR | 2016 | 97.014 | 101.738 | 65.155 | 0.00 | 0.00 |
| ATOM 30166 | 3HG2 | THR | 2016 | 97.105 | 101.847 | 63.433 | 0.00 | 0.00 |
| ATOM 30167 | OG1  | THR | 2016 | 96.251 | 104.403 | 63.283 | 0.00 | 0.00 |
| ATOM 30168 | HG1  | THR | 2016 | 96.724 | 105.150 | 63.657 | 0.00 | 0.00 |
| ATOM 30169 | C    | THR | 2016 | 94.296 | 101.696 | 65.119 | 0.00 | 0.00 |
| ATOM 30170 | O    | THR | 2016 | 93.857 | 101.980 | 66.250 | 0.00 | 0.00 |
| ATOM 30171 | N    | PHE | 2017 | 94.467 | 100.416 | 64.672 | 0.00 | 0.00 |
| ATOM 30172 | H    | PHE | 2017 | 94.876 | 100.249 | 63.763 | 0.00 | 0.00 |
| ATOM 30173 | CA   | PHE | 2017 | 94.537 | 99.279  | 65.553 | 0.00 | 0.00 |
| ATOM 30174 | HA   | PHE | 2017 | 93.764 | 99.423  | 66.308 | 0.00 | 0.00 |
| ATOM 30175 | CB   | PHE | 2017 | 94.290 | 97.997  | 64.851 | 0.00 | 0.00 |
| ATOM 30176 | HB2  | PHE | 2017 | 94.964 | 97.929  | 63.998 | 0.00 | 0.00 |
| ATOM 30177 | HB3  | PHE | 2017 | 94.379 | 97.220  | 65.610 | 0.00 | 0.00 |
| ATOM 30178 | CG   | PHE | 2017 | 92.845 | 97.751  | 64.369 | 0.00 | 0.00 |
| ATOM 30179 | CD1  | PHE | 2017 | 91.710 | 98.006  | 65.134 | 0.00 | 0.00 |

|            |     |     |      |        |        |        |      |      |
|------------|-----|-----|------|--------|--------|--------|------|------|
| ATOM 30180 | HD1 | PHE | 2017 | 91.855 | 98.498 | 66.084 | 0.00 | 0.00 |
| ATOM 30181 | CE1 | PHE | 2017 | 90.401 | 97.676 | 64.652 | 0.00 | 0.00 |
| ATOM 30182 | HE1 | PHE | 2017 | 89.593 | 97.955 | 65.312 | 0.00 | 0.00 |
| ATOM 30183 | CZ  | PHE | 2017 | 90.277 | 97.013 | 63.423 | 0.00 | 0.00 |
| ATOM 30184 | HZ  | PHE | 2017 | 89.323 | 96.770 | 62.979 | 0.00 | 0.00 |
| ATOM 30185 | CE2 | PHE | 2017 | 91.456 | 96.801 | 62.640 | 0.00 | 0.00 |
| ATOM 30186 | HE2 | PHE | 2017 | 91.279 | 96.413 | 61.648 | 0.00 | 0.00 |
| ATOM 30187 | CD2 | PHE | 2017 | 92.726 | 97.100 | 63.155 | 0.00 | 0.00 |
| ATOM 30188 | HD2 | PHE | 2017 | 93.658 | 96.864 | 62.662 | 0.00 | 0.00 |
| ATOM 30189 | C   | PHE | 2017 | 95.828 | 99.268 | 66.313 | 0.00 | 0.00 |
| ATOM 30190 | O   | PHE | 2017 | 96.823 | 99.538 | 65.695 | 0.00 | 0.00 |
| ATOM 30191 | N   | H12 | 2018 | 95.698 | 98.793 | 67.513 | 0.00 | 0.00 |
| ATOM 30192 | H   | H12 | 2018 | 94.785 | 98.729 | 67.940 | 0.00 | 0.00 |
| ATOM 30193 | CA  | H12 | 2018 | 96.852 | 98.225 | 68.351 | 0.00 | 0.00 |
| ATOM 30194 | HA  | H12 | 2018 | 96.591 | 98.380 | 69.398 | 0.00 | 0.00 |
| ATOM 30195 | CB  | H12 | 2018 | 96.951 | 96.646 | 68.301 | 0.00 | 0.00 |
| ATOM 30196 | HB2 | H12 | 2018 | 97.917 | 96.390 | 68.736 | 0.00 | 0.00 |
| ATOM 30197 | HB3 | H12 | 2018 | 96.254 | 96.085 | 68.924 | 0.00 | 0.00 |
| ATOM 30198 | CG  | H12 | 2018 | 96.941 | 96.149 | 66.820 | 0.00 | 0.00 |
| ATOM 30199 | ND1 | H12 | 2018 | 97.805 | 96.643 | 65.938 | 0.00 | 0.00 |
| ATOM 30200 | HD1 | H12 | 2018 | 98.407 | 97.437 | 66.101 | 0.00 | 0.00 |
| ATOM 30201 | CE1 | H12 | 2018 | 97.696 | 95.892 | 64.858 | 0.00 | 0.00 |
| ATOM 30202 | HE1 | H12 | 2018 | 98.395 | 96.064 | 64.053 | 0.00 | 0.00 |
| ATOM 30203 | NE2 | H12 | 2018 | 96.877 | 94.883 | 65.016 | 0.00 | 0.00 |
| ATOM 30204 | CD2 | H12 | 2018 | 96.342 | 95.023 | 66.263 | 0.00 | 0.00 |
| ATOM 30205 | HD2 | H12 | 2018 | 95.705 | 94.417 | 66.891 | 0.00 | 0.00 |

|            |      |     |      |         |         |        |      |      |
|------------|------|-----|------|---------|---------|--------|------|------|
| ATOM 30206 | C    | H12 | 2018 | 98.201  | 98.979  | 68.246 | 0.00 | 0.00 |
| ATOM 30207 | O    | H12 | 2018 | 99.158  | 98.433  | 67.731 | 0.00 | 0.00 |
| ATOM 30208 | N    | THR | 2019 | 98.209  | 100.251 | 68.635 | 0.00 | 0.00 |
| ATOM 30209 | H    | THR | 2019 | 97.485  | 100.591 | 69.251 | 0.00 | 0.00 |
| ATOM 30210 | CA   | THR | 2019 | 99.114  | 101.276 | 68.085 | 0.00 | 0.00 |
| ATOM 30211 | HA   | THR | 2019 | 99.268  | 101.066 | 67.027 | 0.00 | 0.00 |
| ATOM 30212 | CB   | THR | 2019 | 98.499  | 102.717 | 68.182 | 0.00 | 0.00 |
| ATOM 30213 | HB   | THR | 2019 | 98.424  | 102.928 | 69.249 | 0.00 | 0.00 |
| ATOM 30214 | CG2  | THR | 2019 | 99.238  | 103.833 | 67.376 | 0.00 | 0.00 |
| ATOM 30215 | 1HG2 | THR | 2019 | 100.140 | 104.137 | 67.906 | 0.00 | 0.00 |
| ATOM 30216 | 2HG2 | THR | 2019 | 99.390  | 103.413 | 66.382 | 0.00 | 0.00 |
| ATOM 30217 | 3HG2 | THR | 2019 | 98.536  | 104.657 | 67.245 | 0.00 | 0.00 |
| ATOM 30218 | OG1  | THR | 2019 | 97.163  | 102.731 | 67.766 | 0.00 | 0.00 |
| ATOM 30219 | HG1  | THR | 2019 | 96.835  | 102.147 | 68.454 | 0.00 | 0.00 |
| ATOM 30220 | C    | THR | 2019 | 100.633 | 101.197 | 68.669 | 0.00 | 0.00 |
| ATOM 30221 | O    | THR | 2019 | 101.517 | 101.955 | 68.181 | 0.00 | 0.00 |
| ATOM 30222 | N    | GLU | 2020 | 100.984 | 100.389 | 69.680 | 0.00 | 0.00 |
| ATOM 30223 | H    | GLU | 2020 | 100.319 | 99.895  | 70.259 | 0.00 | 0.00 |
| ATOM 30224 | CA   | GLU | 2020 | 102.378 | 100.192 | 69.994 | 0.00 | 0.00 |
| ATOM 30225 | HA   | GLU | 2020 | 102.749 | 101.194 | 70.212 | 0.00 | 0.00 |
| ATOM 30226 | CB   | GLU | 2020 | 102.493 | 99.309  | 71.233 | 0.00 | 0.00 |
| ATOM 30227 | HB2  | GLU | 2020 | 101.799 | 99.662  | 71.996 | 0.00 | 0.00 |
| ATOM 30228 | HB3  | GLU | 2020 | 102.191 | 98.292  | 70.983 | 0.00 | 0.00 |
| ATOM 30229 | CG   | GLU | 2020 | 103.797 | 99.321  | 71.956 | 0.00 | 0.00 |
| ATOM 30230 | HG2  | GLU | 2020 | 103.926 | 100.319 | 72.375 | 0.00 | 0.00 |
| ATOM 30231 | HG3  | GLU | 2020 | 103.650 | 98.637  | 72.791 | 0.00 | 0.00 |

|            |     |     |      |         |         |        |      |      |
|------------|-----|-----|------|---------|---------|--------|------|------|
| ATOM 30232 | CD  | GLU | 2020 | 105.027 | 98.794  | 71.272 | 0.00 | 0.00 |
| ATOM 30233 | OE1 | GLU | 2020 | 104.954 | 97.829  | 70.472 | 0.00 | 0.00 |
| ATOM 30234 | OE2 | GLU | 2020 | 106.173 | 99.307  | 71.522 | 0.00 | 0.00 |
| ATOM 30235 | C   | GLU | 2020 | 103.206 | 99.625  | 68.873 | 0.00 | 0.00 |
| ATOM 30236 | O   | GLU | 2020 | 104.338 | 100.027 | 68.593 | 0.00 | 0.00 |
| ATOM 30237 | N   | GLY | 2021 | 102.704 | 98.604  | 68.080 | 0.00 | 0.00 |
| ATOM 30238 | H   | GLY | 2021 | 101.716 | 98.402  | 68.019 | 0.00 | 0.00 |
| ATOM 30239 | CA  | GLY | 2021 | 103.644 | 97.712  | 67.242 | 0.00 | 0.00 |
| ATOM 30240 | HA2 | GLY | 2021 | 103.413 | 97.707  | 66.177 | 0.00 | 0.00 |
| ATOM 30241 | HA3 | GLY | 2021 | 104.675 | 98.067  | 67.244 | 0.00 | 0.00 |
| ATOM 30242 | C   | GLY | 2021 | 103.813 | 96.247  | 67.714 | 0.00 | 0.00 |
| ATOM 30243 | O   | GLY | 2021 | 104.186 | 95.380  | 66.895 | 0.00 | 0.00 |
| ATOM 30244 | N   | ALA | 2022 | 103.481 | 95.969  | 69.000 | 0.00 | 0.00 |
| ATOM 30245 | H   | ALA | 2022 | 103.495 | 96.677  | 69.721 | 0.00 | 0.00 |
| ATOM 30246 | CA  | ALA | 2022 | 103.289 | 94.607  | 69.545 | 0.00 | 0.00 |
| ATOM 30247 | HA  | ALA | 2022 | 104.178 | 93.986  | 69.441 | 0.00 | 0.00 |
| ATOM 30248 | CB  | ALA | 2022 | 103.038 | 94.747  | 71.018 | 0.00 | 0.00 |
| ATOM 30249 | HB1 | ALA | 2022 | 103.891 | 94.300  | 71.529 | 0.00 | 0.00 |
| ATOM 30250 | HB2 | ALA | 2022 | 102.872 | 95.745  | 71.424 | 0.00 | 0.00 |
| ATOM 30251 | HB3 | ALA | 2022 | 102.149 | 94.196  | 71.325 | 0.00 | 0.00 |
| ATOM 30252 | C   | ALA | 2022 | 102.167 | 93.904  | 68.648 | 0.00 | 0.00 |
| ATOM 30253 | O   | ALA | 2022 | 102.394 | 92.795  | 68.096 | 0.00 | 0.00 |
| ATOM 30254 | N   | GLY | 2023 | 101.021 | 94.571  | 68.592 | 0.00 | 0.00 |
| ATOM 30255 | H   | GLY | 2023 | 100.958 | 95.436  | 69.110 | 0.00 | 0.00 |
| ATOM 30256 | CA  | GLY | 2023 | 99.929  | 94.179  | 67.716 | 0.00 | 0.00 |
| ATOM 30257 | HA2 | GLY | 2023 | 99.713  | 93.124  | 67.883 | 0.00 | 0.00 |

|            |     |     |      |         |         |        |      |      |
|------------|-----|-----|------|---------|---------|--------|------|------|
| ATOM 30258 | HA3 | GLY | 2023 | 98.994  | 94.715  | 67.876 | 0.00 | 0.00 |
| ATOM 30259 | C   | GLY | 2023 | 100.310 | 94.049  | 66.245 | 0.00 | 0.00 |
| ATOM 30260 | O   | GLY | 2023 | 99.567  | 93.396  | 65.474 | 0.00 | 0.00 |
| ATOM 30261 | N   | GLY | 2024 | 101.464 | 94.521  | 65.852 | 0.00 | 0.00 |
| ATOM 30262 | H   | GLY | 2024 | 102.042 | 94.918  | 66.579 | 0.00 | 0.00 |
| ATOM 30263 | CA  | GLY | 2024 | 101.998 | 94.827  | 64.516 | 0.00 | 0.00 |
| ATOM 30264 | HA2 | GLY | 2024 | 102.921 | 94.264  | 64.381 | 0.00 | 0.00 |
| ATOM 30265 | HA3 | GLY | 2024 | 101.348 | 94.314  | 63.807 | 0.00 | 0.00 |
| ATOM 30266 | C   | GLY | 2024 | 102.022 | 96.331  | 64.227 | 0.00 | 0.00 |
| ATOM 30267 | O   | GLY | 2024 | 101.489 | 97.158  | 64.938 | 0.00 | 0.00 |
| ATOM 30268 | N   | GLY | 2025 | 102.716 | 96.739  | 63.153 | 0.00 | 0.00 |
| ATOM 30269 | H   | GLY | 2025 | 103.207 | 96.057  | 62.593 | 0.00 | 0.00 |
| ATOM 30270 | CA  | GLY | 2025 | 102.815 | 98.132  | 62.736 | 0.00 | 0.00 |
| ATOM 30271 | HA2 | GLY | 2025 | 102.524 | 98.252  | 61.693 | 0.00 | 0.00 |
| ATOM 30272 | HA3 | GLY | 2025 | 102.145 | 98.739  | 63.345 | 0.00 | 0.00 |
| ATOM 30273 | C   | GLY | 2025 | 104.297 | 98.644  | 62.815 | 0.00 | 0.00 |
| ATOM 30274 | O   | GLY | 2025 | 105.162 | 98.012  | 63.529 | 0.00 | 0.00 |
| ATOM 30275 | N   | HIP | 2026 | 104.502 | 99.699  | 62.031 | 0.00 | 0.00 |
| ATOM 30276 | H   | HIP | 2026 | 103.750 | 100.148 | 61.528 | 0.00 | 0.00 |
| ATOM 30277 | CA  | HIP | 2026 | 105.851 | 100.143 | 61.639 | 0.00 | 0.00 |
| ATOM 30278 | HA  | HIP | 2026 | 106.253 | 99.355  | 61.003 | 0.00 | 0.00 |
| ATOM 30279 | CB  | HIP | 2026 | 105.804 | 101.474 | 60.908 | 0.00 | 0.00 |
| ATOM 30280 | HB2 | HIP | 2026 | 105.131 | 102.173 | 61.405 | 0.00 | 0.00 |
| ATOM 30281 | HB3 | HIP | 2026 | 106.801 | 101.915 | 60.932 | 0.00 | 0.00 |
| ATOM 30282 | CG  | HIP | 2026 | 105.422 | 101.460 | 59.455 | 0.00 | 0.00 |
| ATOM 30283 | ND1 | HIP | 2026 | 106.282 | 101.011 | 58.523 | 0.00 | 0.00 |



|            |     |     |      |         |         |        |      |      |
|------------|-----|-----|------|---------|---------|--------|------|------|
| ATOM 30284 | HD1 | HIP | 2026 | 107.106 | 100.513 | 58.830 | 0.00 | 0.00 |
| ATOM 30285 | CE1 | HIP | 2026 | 105.651 | 101.135 | 57.335 | 0.00 | 0.00 |
| ATOM 30286 | HE1 | HIP | 2026 | 105.973 | 100.754 | 56.376 | 0.00 | 0.00 |
| ATOM 30287 | NE2 | HIP | 2026 | 104.503 | 101.797 | 57.521 | 0.00 | 0.00 |
| ATOM 30288 | HE2 | HIP | 2026 | 103.809 | 101.831 | 56.788 | 0.00 | 0.00 |
| ATOM 30289 | CD2 | HIP | 2026 | 104.272 | 101.876 | 58.862 | 0.00 | 0.00 |
| ATOM 30290 | HD2 | HIP | 2026 | 103.417 | 102.358 | 59.313 | 0.00 | 0.00 |
| ATOM 30291 | C   | HIP | 2026 | 106.761 | 100.300 | 62.850 | 0.00 | 0.00 |
| ATOM 30292 | O   | HIP | 2026 | 106.556 | 101.212 | 63.612 | 0.00 | 0.00 |
| ATOM 30293 | N   | ALA | 2027 | 107.697 | 99.332  | 62.994 | 0.00 | 0.00 |
| ATOM 30294 | H   | ALA | 2027 | 107.997 | 98.719  | 62.250 | 0.00 | 0.00 |
| ATOM 30295 | CA  | ALA | 2027 | 108.597 | 99.294  | 64.193 | 0.00 | 0.00 |
| ATOM 30296 | HA  | ALA | 2027 | 108.083 | 99.567  | 65.114 | 0.00 | 0.00 |
| ATOM 30297 | CB  | ALA | 2027 | 109.226 | 97.845  | 64.411 | 0.00 | 0.00 |
| ATOM 30298 | HB1 | ALA | 2027 | 108.538 | 97.007  | 64.295 | 0.00 | 0.00 |
| ATOM 30299 | HB2 | ALA | 2027 | 110.022 | 97.695  | 63.681 | 0.00 | 0.00 |
| ATOM 30300 | HB3 | ALA | 2027 | 109.584 | 97.853  | 65.441 | 0.00 | 0.00 |
| ATOM 30301 | C   | ALA | 2027 | 109.687 | 100.281 | 63.863 | 0.00 | 0.00 |
| ATOM 30302 | O   | ALA | 2027 | 110.182 | 100.552 | 62.753 | 0.00 | 0.00 |
| ATOM 30303 | N   | PRO | 2028 | 110.115 | 100.958 | 64.925 | 0.00 | 0.00 |
| ATOM 30304 | CD  | PRO | 2028 | 111.313 | 101.857 | 64.833 | 0.00 | 0.00 |
| ATOM 30305 | HD2 | PRO | 2028 | 112.103 | 101.390 | 64.244 | 0.00 | 0.00 |
| ATOM 30306 | HD3 | PRO | 2028 | 111.036 | 102.830 | 64.426 | 0.00 | 0.00 |
| ATOM 30307 | CG  | PRO | 2028 | 111.746 | 102.030 | 66.234 | 0.00 | 0.00 |
| ATOM 30308 | HG2 | PRO | 2028 | 112.835 | 102.002 | 66.191 | 0.00 | 0.00 |
| ATOM 30309 | HG3 | PRO | 2028 | 111.409 | 103.009 | 66.577 | 0.00 | 0.00 |

|            |              |         |         |        |      |      |
|------------|--------------|---------|---------|--------|------|------|
| ATOM 30310 | CB PRO 2028  | 111.128 | 100.913 | 67.047 | 0.00 | 0.00 |
| ATOM 30311 | HB2 PRO 2028 | 111.757 | 100.025 | 66.982 | 0.00 | 0.00 |
| ATOM 30312 | HB3 PRO 2028 | 111.083 | 101.290 | 68.068 | 0.00 | 0.00 |
| ATOM 30313 | CA PRO 2028  | 109.755 | 100.780 | 66.370 | 0.00 | 0.00 |
| ATOM 30314 | HA PRO 2028  | 109.305 | 99.831  | 66.660 | 0.00 | 0.00 |
| ATOM 30315 | C PRO 2028   | 108.811 | 101.928 | 66.825 | 0.00 | 0.00 |
| ATOM 30316 | O PRO 2028   | 108.571 | 101.992 | 68.074 | 0.00 | 0.00 |
| ATOM 30317 | N ASP 2029   | 108.331 | 102.835 | 65.919 | 0.00 | 0.00 |
| ATOM 30318 | H ASP 2029   | 108.583 | 102.676 | 64.954 | 0.00 | 0.00 |
| ATOM 30319 | CA ASP 2029  | 107.804 | 104.148 | 66.255 | 0.00 | 0.00 |
| ATOM 30320 | HA ASP 2029  | 107.723 | 104.135 | 67.341 | 0.00 | 0.00 |
| ATOM 30321 | CB ASP 2029  | 108.833 | 105.223 | 65.880 | 0.00 | 0.00 |
| ATOM 30322 | HB2 ASP 2029 | 108.629 | 106.072 | 66.532 | 0.00 | 0.00 |
| ATOM 30323 | HB3 ASP 2029 | 109.836 | 104.814 | 66.002 | 0.00 | 0.00 |
| ATOM 30324 | CG ASP 2029  | 108.800 | 105.581 | 64.384 | 0.00 | 0.00 |
| ATOM 30325 | OD1 ASP 2029 | 109.099 | 104.642 | 63.635 | 0.00 | 0.00 |
| ATOM 30326 | OD2 ASP 2029 | 108.493 | 106.756 | 63.997 | 0.00 | 0.00 |
| ATOM 30327 | C ASP 2029   | 106.344 | 104.462 | 65.838 | 0.00 | 0.00 |
| ATOM 30328 | O ASP 2029   | 106.023 | 105.655 | 66.057 | 0.00 | 0.00 |
| ATOM 30329 | N ILE 2030   | 105.536 | 103.539 | 65.272 | 0.00 | 0.00 |
| ATOM 30330 | H ILE 2030   | 105.878 | 102.632 | 64.990 | 0.00 | 0.00 |
| ATOM 30331 | CA ILE 2030  | 104.129 | 103.704 | 64.955 | 0.00 | 0.00 |
| ATOM 30332 | HA ILE 2030  | 104.084 | 104.451 | 64.163 | 0.00 | 0.00 |
| ATOM 30333 | CB ILE 2030  | 103.498 | 102.364 | 64.502 | 0.00 | 0.00 |
| ATOM 30334 | HB ILE 2030  | 104.055 | 102.003 | 63.638 | 0.00 | 0.00 |
| ATOM 30335 | CG2 ILE 2030 | 103.624 | 101.243 | 65.571 | 0.00 | 0.00 |

|      |       |      |     |      |         |         |        |      |      |
|------|-------|------|-----|------|---------|---------|--------|------|------|
| ATOM | 30336 | 1HG2 | ILE | 2030 | 103.038 | 101.383 | 66.479 | 0.00 | 0.00 |
| ATOM | 30337 | 2HG2 | ILE | 2030 | 103.531 | 100.236 | 65.167 | 0.00 | 0.00 |
| ATOM | 30338 | 3HG2 | ILE | 2030 | 104.618 | 101.171 | 66.014 | 0.00 | 0.00 |
| ATOM | 30339 | CG1  | ILE | 2030 | 102.027 | 102.398 | 63.965 | 0.00 | 0.00 |
| ATOM | 30340 | 2HG1 | ILE | 2030 | 101.768 | 101.379 | 63.679 | 0.00 | 0.00 |
| ATOM | 30341 | 3HG1 | ILE | 2030 | 101.409 | 102.721 | 64.803 | 0.00 | 0.00 |
| ATOM | 30342 | CD1  | ILE | 2030 | 101.650 | 103.255 | 62.795 | 0.00 | 0.00 |
| ATOM | 30343 | 1HD1 | ILE | 2030 | 100.651 | 102.963 | 62.472 | 0.00 | 0.00 |
| ATOM | 30344 | 2HD1 | ILE | 2030 | 101.772 | 104.334 | 62.896 | 0.00 | 0.00 |
| ATOM | 30345 | 3HD1 | ILE | 2030 | 102.310 | 102.925 | 61.993 | 0.00 | 0.00 |
| ATOM | 30346 | C    | ILE | 2030 | 103.301 | 104.295 | 66.162 | 0.00 | 0.00 |
| ATOM | 30347 | O    | ILE | 2030 | 102.182 | 104.952 | 65.954 | 0.00 | 0.00 |
| ATOM | 30348 | N    | ILE | 2031 | 103.794 | 104.209 | 67.445 | 0.00 | 0.00 |
| ATOM | 30349 | H    | ILE | 2031 | 104.553 | 103.563 | 67.609 | 0.00 | 0.00 |
| ATOM | 30350 | CA   | ILE | 2031 | 103.014 | 104.758 | 68.588 | 0.00 | 0.00 |
| ATOM | 30351 | HA   | ILE | 2031 | 101.999 | 104.362 | 68.543 | 0.00 | 0.00 |
| ATOM | 30352 | CB   | ILE | 2031 | 103.720 | 104.345 | 69.869 | 0.00 | 0.00 |
| ATOM | 30353 | HB   | ILE | 2031 | 103.990 | 103.293 | 69.768 | 0.00 | 0.00 |
| ATOM | 30354 | CG2  | ILE | 2031 | 104.976 | 105.189 | 70.174 | 0.00 | 0.00 |
| ATOM | 30355 | 1HG2 | ILE | 2031 | 105.518 | 104.798 | 71.035 | 0.00 | 0.00 |
| ATOM | 30356 | 2HG2 | ILE | 2031 | 105.743 | 104.969 | 69.431 | 0.00 | 0.00 |
| ATOM | 30357 | 3HG2 | ILE | 2031 | 104.905 | 106.276 | 70.230 | 0.00 | 0.00 |
| ATOM | 30358 | CG1  | ILE | 2031 | 102.817 | 104.162 | 71.171 | 0.00 | 0.00 |
| ATOM | 30359 | 2HG1 | ILE | 2031 | 102.306 | 105.099 | 71.393 | 0.00 | 0.00 |
| ATOM | 30360 | 3HG1 | ILE | 2031 | 102.033 | 103.474 | 70.857 | 0.00 | 0.00 |
| ATOM | 30361 | CD1  | ILE | 2031 | 103.403 | 103.564 | 72.422 | 0.00 | 0.00 |

|            |      |     |      |         |         |        |      |      |
|------------|------|-----|------|---------|---------|--------|------|------|
| ATOM 30362 | 1HD1 | ILE | 2031 | 102.736 | 103.374 | 73.264 | 0.00 | 0.00 |
| ATOM 30363 | 2HD1 | ILE | 2031 | 103.914 | 102.625 | 72.209 | 0.00 | 0.00 |
| ATOM 30364 | 3HD1 | ILE | 2031 | 104.146 | 104.270 | 72.792 | 0.00 | 0.00 |
| ATOM 30365 | C    | ILE | 2031 | 102.843 | 106.288 | 68.508 | 0.00 | 0.00 |
| ATOM 30366 | O    | ILE | 2031 | 101.841 | 106.819 | 68.972 | 0.00 | 0.00 |
| ATOM 30367 | N    | THR | 2032 | 103.706 | 106.992 | 67.773 | 0.00 | 0.00 |
| ATOM 30368 | H    | THR | 2032 | 104.409 | 106.373 | 67.395 | 0.00 | 0.00 |
| ATOM 30369 | CA   | THR | 2032 | 103.606 | 108.487 | 67.501 | 0.00 | 0.00 |
| ATOM 30370 | HA   | THR | 2032 | 103.500 | 109.024 | 68.444 | 0.00 | 0.00 |
| ATOM 30371 | CB   | THR | 2032 | 104.939 | 108.973 | 66.848 | 0.00 | 0.00 |
| ATOM 30372 | HB   | THR | 2032 | 104.941 | 110.001 | 66.486 | 0.00 | 0.00 |
| ATOM 30373 | CG2  | THR | 2032 | 106.223 | 108.761 | 67.589 | 0.00 | 0.00 |
| ATOM 30374 | 1HG2 | THR | 2032 | 106.524 | 107.714 | 67.618 | 0.00 | 0.00 |
| ATOM 30375 | 2HG2 | THR | 2032 | 106.973 | 109.454 | 67.208 | 0.00 | 0.00 |
| ATOM 30376 | 3HG2 | THR | 2032 | 106.066 | 108.975 | 68.647 | 0.00 | 0.00 |
| ATOM 30377 | OG1  | THR | 2032 | 105.184 | 108.229 | 65.700 | 0.00 | 0.00 |
| ATOM 30378 | HG1  | THR | 2032 | 105.587 | 107.372 | 65.860 | 0.00 | 0.00 |
| ATOM 30379 | C    | THR | 2032 | 102.420 | 108.827 | 66.630 | 0.00 | 0.00 |
| ATOM 30380 | O    | THR | 2032 | 101.953 | 109.995 | 66.542 | 0.00 | 0.00 |
| ATOM 30381 | N    | ALA | 2033 | 101.699 | 107.839 | 66.093 | 0.00 | 0.00 |
| ATOM 30382 | H    | ALA | 2033 | 102.136 | 106.930 | 66.135 | 0.00 | 0.00 |
| ATOM 30383 | CA   | ALA | 2033 | 100.418 | 108.083 | 65.390 | 0.00 | 0.00 |
| ATOM 30384 | HA   | ALA | 2033 | 100.623 | 108.808 | 64.603 | 0.00 | 0.00 |
| ATOM 30385 | CB   | ALA | 2033 | 99.915  | 106.805 | 64.639 | 0.00 | 0.00 |
| ATOM 30386 | HB1  | ALA | 2033 | 99.000  | 107.135 | 64.147 | 0.00 | 0.00 |
| ATOM 30387 | HB2  | ALA | 2033 | 100.666 | 106.373 | 63.978 | 0.00 | 0.00 |

|            |              |         |         |        |      |      |
|------------|--------------|---------|---------|--------|------|------|
| ATOM 30388 | HB3 ALA 2033 | 99.640  | 106.007 | 65.329 | 0.00 | 0.00 |
| ATOM 30389 | C ALA 2033   | 99.290  | 108.672 | 66.350 | 0.00 | 0.00 |
| ATOM 30390 | O ALA 2033   | 98.357  | 109.323 | 65.942 | 0.00 | 0.00 |
| ATOM 30391 | N CYS 2034   | 99.385  | 108.352 | 67.660 | 0.00 | 0.00 |
| ATOM 30392 | H CYS 2034   | 100.098 | 107.703 | 67.962 | 0.00 | 0.00 |
| ATOM 30393 | CA CYS 2034  | 98.370  | 108.827 | 68.602 | 0.00 | 0.00 |
| ATOM 30394 | HA CYS 2034  | 97.419  | 108.490 | 68.190 | 0.00 | 0.00 |
| ATOM 30395 | CB CYS 2034  | 98.318  | 108.023 | 69.976 | 0.00 | 0.00 |
| ATOM 30396 | HB2 CYS 2034 | 97.398  | 108.307 | 70.487 | 0.00 | 0.00 |
| ATOM 30397 | HB3 CYS 2034 | 98.313  | 106.948 | 69.796 | 0.00 | 0.00 |
| ATOM 30398 | SG CYS 2034  | 99.731  | 108.458 | 70.960 | 0.00 | 0.00 |
| ATOM 30399 | HG CYS 2034  | 100.581 | 107.826 | 70.146 | 0.00 | 0.00 |
| ATOM 30400 | C CYS 2034   | 98.350  | 110.373 | 68.796 | 0.00 | 0.00 |
| ATOM 30401 | O CYS 2034   | 97.538  | 110.981 | 69.471 | 0.00 | 0.00 |
| ATOM 30402 | N ALA 2035   | 99.229  | 111.089 | 68.040 | 0.00 | 0.00 |
| ATOM 30403 | H ALA 2035   | 99.955  | 110.560 | 67.579 | 0.00 | 0.00 |
| ATOM 30404 | CA ALA 2035  | 99.449  | 112.512 | 68.180 | 0.00 | 0.00 |
| ATOM 30405 | HA ALA 2035  | 99.076  | 112.793 | 69.165 | 0.00 | 0.00 |
| ATOM 30406 | CB ALA 2035  | 100.967 | 112.677 | 68.273 | 0.00 | 0.00 |
| ATOM 30407 | HB1 ALA 2035 | 101.381 | 112.346 | 67.320 | 0.00 | 0.00 |
| ATOM 30408 | HB2 ALA 2035 | 101.165 | 113.731 | 68.465 | 0.00 | 0.00 |
| ATOM 30409 | HB3 ALA 2035 | 101.354 | 112.092 | 69.108 | 0.00 | 0.00 |
| ATOM 30410 | C ALA 2035   | 98.689  | 113.510 | 67.204 | 0.00 | 0.00 |
| ATOM 30411 | O ALA 2035   | 99.326  | 114.553 | 67.016 | 0.00 | 0.00 |
| ATOM 30412 | N HIE 2036   | 97.570  | 113.108 | 66.568 | 0.00 | 0.00 |
| ATOM 30413 | H HIE 2036   | 97.140  | 112.290 | 66.976 | 0.00 | 0.00 |

|            |     |     |      |         |         |        |      |      |
|------------|-----|-----|------|---------|---------|--------|------|------|
| ATOM 30414 | CA  | HIE | 2036 | 96.939  | 113.632 | 65.401 | 0.00 | 0.00 |
| ATOM 30415 | HA  | HIE | 2036 | 97.299  | 114.632 | 65.162 | 0.00 | 0.00 |
| ATOM 30416 | CB  | HIE | 2036 | 97.303  | 112.862 | 64.144 | 0.00 | 0.00 |
| ATOM 30417 | HB2 | HIE | 2036 | 96.981  | 111.839 | 64.340 | 0.00 | 0.00 |
| ATOM 30418 | HB3 | HIE | 2036 | 96.688  | 113.110 | 63.279 | 0.00 | 0.00 |
| ATOM 30419 | CG  | HIE | 2036 | 98.754  | 112.972 | 63.840 | 0.00 | 0.00 |
| ATOM 30420 | ND1 | HIE | 2036 | 99.420  | 114.153 | 63.623 | 0.00 | 0.00 |
| ATOM 30421 | CE1 | HIE | 2036 | 100.746 | 113.801 | 63.716 | 0.00 | 0.00 |
| ATOM 30422 | HE1 | HIE | 2036 | 101.545 | 114.521 | 63.617 | 0.00 | 0.00 |
| ATOM 30423 | NE2 | HIE | 2036 | 100.887 | 112.523 | 63.900 | 0.00 | 0.00 |
| ATOM 30424 | HE2 | HIE | 2036 | 101.766 | 112.066 | 64.096 | 0.00 | 0.00 |
| ATOM 30425 | CD2 | HIE | 2036 | 99.680  | 111.973 | 64.034 | 0.00 | 0.00 |
| ATOM 30426 | HD2 | HIE | 2036 | 99.449  | 110.972 | 64.367 | 0.00 | 0.00 |
| ATOM 30427 | C   | HIE | 2036 | 95.423  | 113.682 | 65.508 | 0.00 | 0.00 |
| ATOM 30428 | O   | HIE | 2036 | 94.926  | 112.763 | 66.118 | 0.00 | 0.00 |
| ATOM 30429 | N   | PRO | 2037 | 94.731  | 114.649 | 64.863 | 0.00 | 0.00 |
| ATOM 30430 | CD  | PRO | 2037 | 95.287  | 115.731 | 64.057 | 0.00 | 0.00 |
| ATOM 30431 | HD2 | PRO | 2037 | 95.854  | 116.491 | 64.594 | 0.00 | 0.00 |
| ATOM 30432 | HD3 | PRO | 2037 | 95.932  | 115.340 | 63.270 | 0.00 | 0.00 |
| ATOM 30433 | CG  | PRO | 2037 | 94.111  | 116.369 | 63.455 | 0.00 | 0.00 |
| ATOM 30434 | HG2 | PRO | 2037 | 94.300  | 117.440 | 63.382 | 0.00 | 0.00 |
| ATOM 30435 | HG3 | PRO | 2037 | 93.896  | 115.899 | 62.496 | 0.00 | 0.00 |
| ATOM 30436 | CB  | PRO | 2037 | 93.020  | 116.136 | 64.512 | 0.00 | 0.00 |
| ATOM 30437 | HB2 | PRO | 2037 | 93.261  | 116.827 | 65.319 | 0.00 | 0.00 |
| ATOM 30438 | HB3 | PRO | 2037 | 91.999  | 116.246 | 64.147 | 0.00 | 0.00 |
| ATOM 30439 | CA  | PRO | 2037 | 93.284  | 114.696 | 64.956 | 0.00 | 0.00 |

|            |               |        |         |        |      |      |
|------------|---------------|--------|---------|--------|------|------|
| ATOM 30440 | HA PRO 2037   | 93.061 | 114.626 | 66.020 | 0.00 | 0.00 |
| ATOM 30441 | C PRO 2037    | 92.502 | 113.707 | 64.081 | 0.00 | 0.00 |
| ATOM 30442 | O PRO 2037    | 91.371 | 113.399 | 64.397 | 0.00 | 0.00 |
| ATOM 30443 | N ASN 2038    | 93.143 | 113.301 | 62.941 | 0.00 | 0.00 |
| ATOM 30444 | H ASN 2038    | 94.115 | 113.467 | 62.724 | 0.00 | 0.00 |
| ATOM 30445 | CA ASN 2038   | 92.487 | 112.342 | 62.004 | 0.00 | 0.00 |
| ATOM 30446 | HA ASN 2038   | 91.413 | 112.511 | 61.931 | 0.00 | 0.00 |
| ATOM 30447 | CB ASN 2038   | 92.954 | 112.562 | 60.550 | 0.00 | 0.00 |
| ATOM 30448 | HB2 ASN 2038  | 92.569 | 111.722 | 59.972 | 0.00 | 0.00 |
| ATOM 30449 | HB3 ASN 2038  | 92.658 | 113.530 | 60.145 | 0.00 | 0.00 |
| ATOM 30450 | CG ASN 2038   | 94.420 | 112.350 | 60.491 | 0.00 | 0.00 |
| ATOM 30451 | OD1 ASN 2038  | 95.254 | 112.876 | 61.226 | 0.00 | 0.00 |
| ATOM 30452 | ND2 ASN 2038  | 94.874 | 111.441 | 59.707 | 0.00 | 0.00 |
| ATOM 30453 | 1HD2 ASN 2038 | 95.783 | 111.027 | 59.854 | 0.00 | 0.00 |
| ATOM 30454 | 2HD2 ASN 2038 | 94.272 | 110.985 | 59.036 | 0.00 | 0.00 |
| ATOM 30455 | C ASN 2038    | 92.562 | 110.871 | 62.376 | 0.00 | 0.00 |
| ATOM 30456 | O ASN 2038    | 92.014 | 109.930 | 61.817 | 0.00 | 0.00 |
| ATOM 30457 | N ILE 2039    | 93.373 | 110.602 | 63.364 | 0.00 | 0.00 |
| ATOM 30458 | H ILE 2039    | 93.918 | 111.303 | 63.845 | 0.00 | 0.00 |
| ATOM 30459 | CA ILE 2039   | 93.730 | 109.183 | 63.763 | 0.00 | 0.00 |
| ATOM 30460 | HA ILE 2039   | 93.420 | 108.549 | 62.932 | 0.00 | 0.00 |
| ATOM 30461 | CB ILE 2039   | 95.287 | 109.021 | 63.875 | 0.00 | 0.00 |
| ATOM 30462 | HB ILE 2039   | 95.647 | 109.618 | 64.713 | 0.00 | 0.00 |
| ATOM 30463 | CG2 ILE 2039  | 95.446 | 107.471 | 64.220 | 0.00 | 0.00 |
| ATOM 30464 | 1HG2 ILE 2039 | 96.470 | 107.153 | 64.416 | 0.00 | 0.00 |
| ATOM 30465 | 2HG2 ILE 2039 | 94.869 | 107.280 | 65.125 | 0.00 | 0.00 |

|            |      |     |      |        |         |        |      |      |
|------------|------|-----|------|--------|---------|--------|------|------|
| ATOM 30466 | 3HG2 | ILE | 2039 | 95.100 | 106.799 | 63.436 | 0.00 | 0.00 |
| ATOM 30467 | CG1  | ILE | 2039 | 95.926 | 109.433 | 62.515 | 0.00 | 0.00 |
| ATOM 30468 | 2HG1 | ILE | 2039 | 95.548 | 108.809 | 61.705 | 0.00 | 0.00 |
| ATOM 30469 | 3HG1 | ILE | 2039 | 95.547 | 110.433 | 62.306 | 0.00 | 0.00 |
| ATOM 30470 | CD1  | ILE | 2039 | 97.463 | 109.339 | 62.491 | 0.00 | 0.00 |
| ATOM 30471 | 1HD1 | ILE | 2039 | 97.804 | 108.342 | 62.769 | 0.00 | 0.00 |
| ATOM 30472 | 2HD1 | ILE | 2039 | 97.907 | 109.712 | 61.568 | 0.00 | 0.00 |
| ATOM 30473 | 3HD1 | ILE | 2039 | 97.750 | 110.004 | 63.305 | 0.00 | 0.00 |
| ATOM 30474 | C    | ILE | 2039 | 92.855 | 108.766 | 65.015 | 0.00 | 0.00 |
| ATOM 30475 | O    | ILE | 2039 | 93.004 | 109.497 | 66.004 | 0.00 | 0.00 |
| ATOM 30476 | N    | LEU | 2040 | 92.138 | 107.597 | 64.907 | 0.00 | 0.00 |
| ATOM 30477 | H    | LEU | 2040 | 92.098 | 107.100 | 64.029 | 0.00 | 0.00 |
| ATOM 30478 | CA   | LEU | 2040 | 91.428 | 107.017 | 66.033 | 0.00 | 0.00 |
| ATOM 30479 | HA   | LEU | 2040 | 91.461 | 107.759 | 66.831 | 0.00 | 0.00 |
| ATOM 30480 | CB   | LEU | 2040 | 90.022 | 106.566 | 65.637 | 0.00 | 0.00 |
| ATOM 30481 | HB2  | LEU | 2040 | 90.039 | 105.762 | 64.901 | 0.00 | 0.00 |
| ATOM 30482 | HB3  | LEU | 2040 | 89.473 | 106.138 | 66.476 | 0.00 | 0.00 |
| ATOM 30483 | CG   | LEU | 2040 | 88.989 | 107.653 | 65.074 | 0.00 | 0.00 |
| ATOM 30484 | HG   | LEU | 2040 | 88.024 | 107.183 | 65.262 | 0.00 | 0.00 |
| ATOM 30485 | CD1  | LEU | 2040 | 89.055 | 108.992 | 65.844 | 0.00 | 0.00 |
| ATOM 30486 | 1HD1 | LEU | 2040 | 88.226 | 109.657 | 65.603 | 0.00 | 0.00 |
| ATOM 30487 | 2HD1 | LEU | 2040 | 88.931 | 108.753 | 66.901 | 0.00 | 0.00 |
| ATOM 30488 | 3HD1 | LEU | 2040 | 90.001 | 109.518 | 65.719 | 0.00 | 0.00 |
| ATOM 30489 | CD2  | LEU | 2040 | 89.055 | 107.811 | 63.554 | 0.00 | 0.00 |
| ATOM 30490 | 1HD2 | LEU | 2040 | 89.992 | 108.353 | 63.425 | 0.00 | 0.00 |
| ATOM 30491 | 2HD2 | LEU | 2040 | 89.167 | 106.837 | 63.078 | 0.00 | 0.00 |



|            |      |     |      |        |         |        |      |      |
|------------|------|-----|------|--------|---------|--------|------|------|
| ATOM 30492 | 3HD2 | LEU | 2040 | 88.156 | 108.348 | 63.250 | 0.00 | 0.00 |
| ATOM 30493 | C    | LEU | 2040 | 92.247 | 105.829 | 66.663 | 0.00 | 0.00 |
| ATOM 30494 | O    | LEU | 2040 | 92.136 | 104.722 | 66.143 | 0.00 | 0.00 |
| ATOM 30495 | N    | PRO | 2041 | 93.036 | 106.049 | 67.737 | 0.00 | 0.00 |
| ATOM 30496 | CD   | PRO | 2041 | 93.290 | 107.279 | 68.463 | 0.00 | 0.00 |
| ATOM 30497 | HD2  | PRO | 2041 | 93.138 | 108.143 | 67.816 | 0.00 | 0.00 |
| ATOM 30498 | HD3  | PRO | 2041 | 92.687 | 107.129 | 69.359 | 0.00 | 0.00 |
| ATOM 30499 | CG   | PRO | 2041 | 94.796 | 107.163 | 68.897 | 0.00 | 0.00 |
| ATOM 30500 | HG2  | PRO | 2041 | 95.480 | 107.482 | 68.110 | 0.00 | 0.00 |
| ATOM 30501 | HG3  | PRO | 2041 | 95.027 | 107.820 | 69.735 | 0.00 | 0.00 |
| ATOM 30502 | CB   | PRO | 2041 | 95.013 | 105.674 | 69.173 | 0.00 | 0.00 |
| ATOM 30503 | HB2  | PRO | 2041 | 96.000 | 105.380 | 68.817 | 0.00 | 0.00 |
| ATOM 30504 | HB3  | PRO | 2041 | 94.825 | 105.622 | 70.246 | 0.00 | 0.00 |
| ATOM 30505 | CA   | PRO | 2041 | 93.874 | 104.957 | 68.340 | 0.00 | 0.00 |
| ATOM 30506 | HA   | PRO | 2041 | 94.381 | 104.399 | 67.553 | 0.00 | 0.00 |
| ATOM 30507 | C    | PRO | 2041 | 93.177 | 103.907 | 69.285 | 0.00 | 0.00 |
| ATOM 30508 | O    | PRO | 2041 | 92.732 | 104.244 | 70.324 | 0.00 | 0.00 |
| ATOM 30509 | N    | SER | 2042 | 93.441 | 102.600 | 68.984 | 0.00 | 0.00 |
| ATOM 30510 | H    | SER | 2042 | 93.665 | 102.295 | 68.048 | 0.00 | 0.00 |
| ATOM 30511 | CA   | SER | 2042 | 93.359 | 101.491 | 70.017 | 0.00 | 0.00 |
| ATOM 30512 | HA   | SER | 2042 | 92.951 | 101.868 | 70.955 | 0.00 | 0.00 |
| ATOM 30513 | CB   | SER | 2042 | 92.298 | 100.438 | 69.529 | 0.00 | 0.00 |
| ATOM 30514 | HB2  | SER | 2042 | 92.012 | 99.895  | 70.430 | 0.00 | 0.00 |
| ATOM 30515 | HB3  | SER | 2042 | 91.460 | 100.877 | 68.988 | 0.00 | 0.00 |
| ATOM 30516 | OG   | SER | 2042 | 92.893 | 99.450  | 68.635 | 0.00 | 0.00 |
| ATOM 30517 | HG   | SER | 2042 | 92.307 | 98.690  | 68.671 | 0.00 | 0.00 |

|            |      |          |        |         |        |      |      |
|------------|------|----------|--------|---------|--------|------|------|
| ATOM 30518 | C    | SER 2042 | 94.675 | 100.854 | 70.540 | 0.00 | 0.00 |
| ATOM 30519 | O    | SER 2042 | 95.713 | 100.921 | 69.914 | 0.00 | 0.00 |
| ATOM 30520 | N    | SER 2043 | 94.600 | 100.291 | 71.766 | 0.00 | 0.00 |
| ATOM 30521 | H    | SER 2043 | 93.732 | 100.053 | 72.225 | 0.00 | 0.00 |
| ATOM 30522 | CA   | SER 2043 | 95.702 | 99.533  | 72.378 | 0.00 | 0.00 |
| ATOM 30523 | HA   | SER 2043 | 96.669 | 100.006 | 72.203 | 0.00 | 0.00 |
| ATOM 30524 | CB   | SER 2043 | 95.645 | 99.439  | 73.918 | 0.00 | 0.00 |
| ATOM 30525 | HB2  | SER 2043 | 96.498 | 98.813  | 74.178 | 0.00 | 0.00 |
| ATOM 30526 | HB3  | SER 2043 | 95.726 | 100.409 | 74.409 | 0.00 | 0.00 |
| ATOM 30527 | OG   | SER 2043 | 94.413 | 98.878  | 74.332 | 0.00 | 0.00 |
| ATOM 30528 | HG   | SER 2043 | 94.540 | 97.934  | 74.210 | 0.00 | 0.00 |
| ATOM 30529 | C    | SER 2043 | 95.697 | 98.113  | 71.765 | 0.00 | 0.00 |
| ATOM 30530 | O    | SER 2043 | 94.663 | 97.519  | 71.585 | 0.00 | 0.00 |
| ATOM 30531 | N    | THR 2044 | 96.887 | 97.468  | 71.705 | 0.00 | 0.00 |
| ATOM 30532 | H    | THR 2044 | 97.677 | 97.968  | 72.089 | 0.00 | 0.00 |
| ATOM 30533 | CA   | THR 2044 | 97.002 | 96.002  | 71.805 | 0.00 | 0.00 |
| ATOM 30534 | HA   | THR 2044 | 96.307 | 95.605  | 71.066 | 0.00 | 0.00 |
| ATOM 30535 | CB   | THR 2044 | 98.464 | 95.574  | 71.608 | 0.00 | 0.00 |
| ATOM 30536 | HB   | THR 2044 | 98.776 | 95.607  | 72.652 | 0.00 | 0.00 |
| ATOM 30537 | CG2  | THR 2044 | 98.625 | 94.160  | 71.046 | 0.00 | 0.00 |
| ATOM 30538 | 1HG2 | THR 2044 | 97.983 | 93.522  | 71.654 | 0.00 | 0.00 |
| ATOM 30539 | 2HG2 | THR 2044 | 98.251 | 94.001  | 70.035 | 0.00 | 0.00 |
| ATOM 30540 | 3HG2 | THR 2044 | 99.639 | 93.787  | 71.188 | 0.00 | 0.00 |
| ATOM 30541 | OG1  | THR 2044 | 99.193 | 96.528  | 70.883 | 0.00 | 0.00 |
| ATOM 30542 | HG1  | THR 2044 | 99.342 | 97.301  | 71.433 | 0.00 | 0.00 |
| ATOM 30543 | C    | THR 2044 | 96.411 | 95.404  | 73.152 | 0.00 | 0.00 |

|            |      |     |      |        |        |        |      |      |
|------------|------|-----|------|--------|--------|--------|------|------|
| ATOM 30544 | O    | THR | 2044 | 96.076 | 96.232 | 74.032 | 0.00 | 0.00 |
| ATOM 30545 | N    | ASN | 2045 | 96.193 | 94.057 | 73.211 | 0.00 | 0.00 |
| ATOM 30546 | H    | ASN | 2045 | 96.457 | 93.456 | 72.444 | 0.00 | 0.00 |
| ATOM 30547 | CA   | ASN | 2045 | 95.357 | 93.298 | 74.212 | 0.00 | 0.00 |
| ATOM 30548 | HA   | ASN | 2045 | 94.901 | 94.072 | 74.829 | 0.00 | 0.00 |
| ATOM 30549 | CB   | ASN | 2045 | 94.257 | 92.546 | 73.435 | 0.00 | 0.00 |
| ATOM 30550 | HB2  | ASN | 2045 | 93.670 | 93.308 | 72.922 | 0.00 | 0.00 |
| ATOM 30551 | HB3  | ASN | 2045 | 94.620 | 92.079 | 72.519 | 0.00 | 0.00 |
| ATOM 30552 | CG   | ASN | 2045 | 93.352 | 91.633 | 74.258 | 0.00 | 0.00 |
| ATOM 30553 | OD1  | ASN | 2045 | 93.801 | 90.597 | 74.752 | 0.00 | 0.00 |
| ATOM 30554 | ND2  | ASN | 2045 | 92.087 | 91.852 | 74.243 | 0.00 | 0.00 |
| ATOM 30555 | 1HD2 | ASN | 2045 | 91.461 | 91.133 | 74.574 | 0.00 | 0.00 |
| ATOM 30556 | 2HD2 | ASN | 2045 | 91.724 | 92.660 | 73.759 | 0.00 | 0.00 |
| ATOM 30557 | C    | ASN | 2045 | 96.156 | 92.529 | 75.237 | 0.00 | 0.00 |
| ATOM 30558 | O    | ASN | 2045 | 96.097 | 92.873 | 76.397 | 0.00 | 0.00 |
| ATOM 30559 | N    | PRO | 2046 | 96.985 | 91.552 | 74.857 | 0.00 | 0.00 |
| ATOM 30560 | CD   | PRO | 2046 | 97.250 | 91.189 | 73.479 | 0.00 | 0.00 |
| ATOM 30561 | HD2  | PRO | 2046 | 96.396 | 90.708 | 73.002 | 0.00 | 0.00 |
| ATOM 30562 | HD3  | PRO | 2046 | 97.465 | 92.056 | 72.854 | 0.00 | 0.00 |
| ATOM 30563 | CG   | PRO | 2046 | 98.474 | 90.252 | 73.619 | 0.00 | 0.00 |
| ATOM 30564 | HG2  | PRO | 2046 | 98.521 | 89.415 | 72.922 | 0.00 | 0.00 |
| ATOM 30565 | HG3  | PRO | 2046 | 99.359 | 90.849 | 73.395 | 0.00 | 0.00 |
| ATOM 30566 | CB   | PRO | 2046 | 98.315 | 89.685 | 75.000 | 0.00 | 0.00 |
| ATOM 30567 | HB2  | PRO | 2046 | 97.607 | 88.856 | 74.997 | 0.00 | 0.00 |
| ATOM 30568 | HB3  | PRO | 2046 | 99.233 | 89.192 | 75.320 | 0.00 | 0.00 |
| ATOM 30569 | CA   | PRO | 2046 | 97.851 | 90.815 | 75.833 | 0.00 | 0.00 |

|            |      |     |      |         |        |        |      |      |
|------------|------|-----|------|---------|--------|--------|------|------|
| ATOM 30570 | HA   | PRO | 2046 | 97.226  | 90.370 | 76.606 | 0.00 | 0.00 |
| ATOM 30571 | C    | PRO | 2046 | 98.914  | 91.728 | 76.477 | 0.00 | 0.00 |
| ATOM 30572 | O    | PRO | 2046 | 99.460  | 91.349 | 77.529 | 0.00 | 0.00 |
| ATOM 30573 | N    | THR | 2047 | 99.048  | 92.971 | 76.024 | 0.00 | 0.00 |
| ATOM 30574 | H    | THR | 2047 | 98.563  | 93.248 | 75.183 | 0.00 | 0.00 |
| ATOM 30575 | CA   | THR | 2047 | 99.839  | 94.000 | 76.605 | 0.00 | 0.00 |
| ATOM 30576 | HA   | THR | 2047 | 100.802 | 93.531 | 76.808 | 0.00 | 0.00 |
| ATOM 30577 | CB   | THR | 2047 | 100.201 | 95.136 | 75.642 | 0.00 | 0.00 |
| ATOM 30578 | HB   | THR | 2047 | 100.800 | 95.886 | 76.158 | 0.00 | 0.00 |
| ATOM 30579 | CG2  | THR | 2047 | 100.915 | 94.618 | 74.416 | 0.00 | 0.00 |
| ATOM 30580 | 1HG2 | THR | 2047 | 101.824 | 94.081 | 74.690 | 0.00 | 0.00 |
| ATOM 30581 | 2HG2 | THR | 2047 | 100.183 | 94.001 | 73.894 | 0.00 | 0.00 |
| ATOM 30582 | 3HG2 | THR | 2047 | 101.108 | 95.485 | 73.784 | 0.00 | 0.00 |
| ATOM 30583 | OG1  | THR | 2047 | 98.935  | 95.606 | 75.126 | 0.00 | 0.00 |
| ATOM 30584 | HG1  | THR | 2047 | 99.094  | 96.421 | 74.644 | 0.00 | 0.00 |
| ATOM 30585 | C    | THR | 2047 | 99.272  | 94.565 | 77.896 | 0.00 | 0.00 |
| ATOM 30586 | O    | THR | 2047 | 99.917  | 95.443 | 78.559 | 0.00 | 0.00 |
| ATOM 30587 | N    | LEU | 2048 | 98.048  | 94.074 | 78.275 | 0.00 | 0.00 |
| ATOM 30588 | H    | LEU | 2048 | 97.642  | 93.303 | 77.763 | 0.00 | 0.00 |
| ATOM 30589 | CA   | LEU | 2048 | 97.383  | 94.751 | 79.377 | 0.00 | 0.00 |
| ATOM 30590 | HA   | LEU | 2048 | 98.009  | 95.573 | 79.724 | 0.00 | 0.00 |
| ATOM 30591 | CB   | LEU | 2048 | 96.084  | 95.452 | 78.806 | 0.00 | 0.00 |
| ATOM 30592 | HB2  | LEU | 2048 | 95.496  | 94.622 | 78.414 | 0.00 | 0.00 |
| ATOM 30593 | HB3  | LEU | 2048 | 95.434  | 95.835 | 79.593 | 0.00 | 0.00 |
| ATOM 30594 | CG   | LEU | 2048 | 96.220  | 96.413 | 77.632 | 0.00 | 0.00 |
| ATOM 30595 | HG   | LEU | 2048 | 96.735  | 95.844 | 76.858 | 0.00 | 0.00 |

|            |          |      |         |        |        |      |      |
|------------|----------|------|---------|--------|--------|------|------|
| ATOM 30596 | CD1 LEU  | 2048 | 94.825  | 96.798 | 77.214 | 0.00 | 0.00 |
| ATOM 30597 | 1HD1 LEU | 2048 | 94.239  | 97.234 | 78.024 | 0.00 | 0.00 |
| ATOM 30598 | 2HD1 LEU | 2048 | 94.902  | 97.506 | 76.388 | 0.00 | 0.00 |
| ATOM 30599 | 3HD1 LEU | 2048 | 94.294  | 95.937 | 76.808 | 0.00 | 0.00 |
| ATOM 30600 | CD2 LEU  | 2048 | 97.157  | 97.589 | 78.045 | 0.00 | 0.00 |
| ATOM 30601 | 1HD2 LEU | 2048 | 98.126  | 97.267 | 78.426 | 0.00 | 0.00 |
| ATOM 30602 | 2HD2 LEU | 2048 | 97.237  | 98.219 | 77.159 | 0.00 | 0.00 |
| ATOM 30603 | 3HD2 LEU | 2048 | 96.623  | 98.199 | 78.774 | 0.00 | 0.00 |
| ATOM 30604 | C LEU    | 2048 | 97.075  | 93.873 | 80.576 | 0.00 | 0.00 |
| ATOM 30605 | O LEU    | 2048 | 96.504  | 92.770 | 80.400 | 0.00 | 0.00 |
| ATOM 30606 | N PRO    | 2049 | 97.371  | 94.251 | 81.793 | 0.00 | 0.00 |
| ATOM 30607 | CD PRO   | 2049 | 96.841  | 93.634 | 82.977 | 0.00 | 0.00 |
| ATOM 30608 | HD2 PRO  | 2049 | 95.765  | 93.801 | 83.035 | 0.00 | 0.00 |
| ATOM 30609 | HD3 PRO  | 2049 | 97.076  | 92.574 | 83.075 | 0.00 | 0.00 |
| ATOM 30610 | CG PRO   | 2049 | 97.384  | 94.420 | 84.146 | 0.00 | 0.00 |
| ATOM 30611 | HG2 PRO  | 2049 | 96.625  | 94.648 | 84.893 | 0.00 | 0.00 |
| ATOM 30612 | HG3 PRO  | 2049 | 98.119  | 93.829 | 84.692 | 0.00 | 0.00 |
| ATOM 30613 | CB PRO   | 2049 | 97.999  | 95.654 | 83.573 | 0.00 | 0.00 |
| ATOM 30614 | HB2 PRO  | 2049 | 97.199  | 96.394 | 83.537 | 0.00 | 0.00 |
| ATOM 30615 | HB3 PRO  | 2049 | 98.814  | 95.935 | 84.240 | 0.00 | 0.00 |
| ATOM 30616 | CA PRO   | 2049 | 98.308  | 95.287 | 82.141 | 0.00 | 0.00 |
| ATOM 30617 | HA PRO   | 2049 | 98.190  | 96.218 | 81.586 | 0.00 | 0.00 |
| ATOM 30618 | C PRO    | 2049 | 99.752  | 94.843 | 81.978 | 0.00 | 0.00 |
| ATOM 30619 | O PRO    | 2049 | 99.999  | 93.663 | 81.625 | 0.00 | 0.00 |
| ATOM 30620 | N TYR    | 2050 | 100.714 | 95.665 | 82.264 | 0.00 | 0.00 |
| ATOM 30621 | H TYR    | 2050 | 100.468 | 96.636 | 82.394 | 0.00 | 0.00 |

|      |       |     |     |      |         |        |        |      |      |
|------|-------|-----|-----|------|---------|--------|--------|------|------|
| ATOM | 30622 | CA  | TYR | 2050 | 102.110 | 95.245 | 82.333 | 0.00 | 0.00 |
| ATOM | 30623 | HA  | TYR | 2050 | 102.507 | 94.687 | 81.485 | 0.00 | 0.00 |
| ATOM | 30624 | CB  | TYR | 2050 | 102.893 | 96.549 | 82.265 | 0.00 | 0.00 |
| ATOM | 30625 | HB2 | TYR | 2050 | 102.504 | 97.154 | 81.446 | 0.00 | 0.00 |
| ATOM | 30626 | HB3 | TYR | 2050 | 102.726 | 96.997 | 83.244 | 0.00 | 0.00 |
| ATOM | 30627 | CG  | TYR | 2050 | 104.419 | 96.612 | 81.995 | 0.00 | 0.00 |
| ATOM | 30628 | CD1 | TYR | 2050 | 104.993 | 95.917 | 80.865 | 0.00 | 0.00 |
| ATOM | 30629 | HD1 | TYR | 2050 | 104.401 | 95.322 | 80.184 | 0.00 | 0.00 |
| ATOM | 30630 | CE1 | TYR | 2050 | 106.376 | 95.963 | 80.733 | 0.00 | 0.00 |
| ATOM | 30631 | HE1 | TYR | 2050 | 106.814 | 95.358 | 79.953 | 0.00 | 0.00 |
| ATOM | 30632 | CZ  | TYR | 2050 | 107.208 | 96.741 | 81.605 | 0.00 | 0.00 |
| ATOM | 30633 | OH  | TYR | 2050 | 108.551 | 96.735 | 81.401 | 0.00 | 0.00 |
| ATOM | 30634 | HH  | TYR | 2050 | 109.022 | 97.402 | 81.907 | 0.00 | 0.00 |
| ATOM | 30635 | CE2 | TYR | 2050 | 106.629 | 97.453 | 82.580 | 0.00 | 0.00 |
| ATOM | 30636 | HE2 | TYR | 2050 | 107.288 | 98.023 | 83.219 | 0.00 | 0.00 |
| ATOM | 30637 | CD2 | TYR | 2050 | 105.237 | 97.410 | 82.812 | 0.00 | 0.00 |
| ATOM | 30638 | HD2 | TYR | 2050 | 104.800 | 98.023 | 83.586 | 0.00 | 0.00 |
| ATOM | 30639 | C   | TYR | 2050 | 102.399 | 94.449 | 83.620 | 0.00 | 0.00 |
| ATOM | 30640 | O   | TYR | 2050 | 102.271 | 94.974 | 84.680 | 0.00 | 0.00 |
| ATOM | 30641 | N   | THR | 2051 | 102.794 | 93.199 | 83.399 | 0.00 | 0.00 |
| ATOM | 30642 | H   | THR | 2051 | 102.829 | 92.885 | 82.440 | 0.00 | 0.00 |
| ATOM | 30643 | CA  | THR | 2051 | 102.989 | 92.214 | 84.483 | 0.00 | 0.00 |
| ATOM | 30644 | HA  | THR | 2051 | 103.383 | 92.640 | 85.406 | 0.00 | 0.00 |
| ATOM | 30645 | CB  | THR | 2051 | 101.727 | 91.362 | 84.741 | 0.00 | 0.00 |
| ATOM | 30646 | HB  | THR | 2051 | 101.947 | 90.972 | 85.734 | 0.00 | 0.00 |
| ATOM | 30647 | CG2 | THR | 2051 | 100.499 | 92.197 | 84.839 | 0.00 | 0.00 |

|      |       |      |     |      |         |        |        |      |      |
|------|-------|------|-----|------|---------|--------|--------|------|------|
| ATOM | 30648 | 1HG2 | THR | 2051 | 100.538 | 93.120 | 85.418 | 0.00 | 0.00 |
| ATOM | 30649 | 2HG2 | THR | 2051 | 100.292 | 92.456 | 83.800 | 0.00 | 0.00 |
| ATOM | 30650 | 3HG2 | THR | 2051 | 99.718  | 91.513 | 85.170 | 0.00 | 0.00 |
| ATOM | 30651 | OG1  | THR | 2051 | 101.425 | 90.327 | 83.799 | 0.00 | 0.00 |
| ATOM | 30652 | HG1  | THR | 2051 | 100.821 | 89.817 | 84.344 | 0.00 | 0.00 |
| ATOM | 30653 | C    | THR | 2051 | 104.099 | 91.186 | 84.087 | 0.00 | 0.00 |
| ATOM | 30654 | O    | THR | 2051 | 104.428 | 91.096 | 82.873 | 0.00 | 0.00 |
| ATOM | 30655 | N    | LEU | 2052 | 104.633 | 90.437 | 85.060 | 0.00 | 0.00 |
| ATOM | 30656 | H    | LEU | 2052 | 104.350 | 90.598 | 86.016 | 0.00 | 0.00 |
| ATOM | 30657 | CA   | LEU | 2052 | 105.706 | 89.466 | 84.860 | 0.00 | 0.00 |
| ATOM | 30658 | HA   | LEU | 2052 | 106.460 | 90.128 | 84.435 | 0.00 | 0.00 |
| ATOM | 30659 | CB   | LEU | 2052 | 106.089 | 88.794 | 86.144 | 0.00 | 0.00 |
| ATOM | 30660 | HB2  | LEU | 2052 | 107.048 | 88.355 | 85.869 | 0.00 | 0.00 |
| ATOM | 30661 | HB3  | LEU | 2052 | 106.309 | 89.555 | 86.893 | 0.00 | 0.00 |
| ATOM | 30662 | CG   | LEU | 2052 | 105.318 | 87.631 | 86.735 | 0.00 | 0.00 |
| ATOM | 30663 | HG   | LEU | 2052 | 105.115 | 86.934 | 85.922 | 0.00 | 0.00 |
| ATOM | 30664 | CD1  | LEU | 2052 | 106.032 | 86.802 | 87.788 | 0.00 | 0.00 |
| ATOM | 30665 | 1HD1 | LEU | 2052 | 106.922 | 86.305 | 87.401 | 0.00 | 0.00 |
| ATOM | 30666 | 2HD1 | LEU | 2052 | 106.314 | 87.353 | 88.686 | 0.00 | 0.00 |
| ATOM | 30667 | 3HD1 | LEU | 2052 | 105.359 | 86.098 | 88.278 | 0.00 | 0.00 |
| ATOM | 30668 | CD2  | LEU | 2052 | 103.914 | 88.054 | 87.252 | 0.00 | 0.00 |
| ATOM | 30669 | 1HD2 | LEU | 2052 | 104.083 | 88.595 | 88.184 | 0.00 | 0.00 |
| ATOM | 30670 | 2HD2 | LEU | 2052 | 103.328 | 88.699 | 86.597 | 0.00 | 0.00 |
| ATOM | 30671 | 3HD2 | LEU | 2052 | 103.359 | 87.122 | 87.356 | 0.00 | 0.00 |
| ATOM | 30672 | C    | LEU | 2052 | 105.337 | 88.390 | 83.788 | 0.00 | 0.00 |
| ATOM | 30673 | O    | LEU | 2052 | 106.225 | 87.774 | 83.237 | 0.00 | 0.00 |

|            |      |          |         |        |        |      |      |
|------------|------|----------|---------|--------|--------|------|------|
| ATOM 30674 | N    | ASN 2053 | 104.071 | 88.011 | 83.489 | 0.00 | 0.00 |
| ATOM 30675 | H    | ASN 2053 | 103.327 | 88.547 | 83.912 | 0.00 | 0.00 |
| ATOM 30676 | CA   | ASN 2053 | 103.656 | 87.024 | 82.487 | 0.00 | 0.00 |
| ATOM 30677 | HA   | ASN 2053 | 104.496 | 86.391 | 82.202 | 0.00 | 0.00 |
| ATOM 30678 | CB   | ASN 2053 | 102.576 | 86.154 | 83.131 | 0.00 | 0.00 |
| ATOM 30679 | HB2  | ASN 2053 | 101.842 | 86.892 | 83.452 | 0.00 | 0.00 |
| ATOM 30680 | HB3  | ASN 2053 | 102.198 | 85.404 | 82.436 | 0.00 | 0.00 |
| ATOM 30681 | CG   | ASN 2053 | 103.085 | 85.377 | 84.383 | 0.00 | 0.00 |
| ATOM 30682 | OD1  | ASN 2053 | 104.183 | 84.870 | 84.281 | 0.00 | 0.00 |
| ATOM 30683 | ND2  | ASN 2053 | 102.386 | 85.060 | 85.473 | 0.00 | 0.00 |
| ATOM 30684 | 1HD2 | ASN 2053 | 102.882 | 84.570 | 86.204 | 0.00 | 0.00 |
| ATOM 30685 | 2HD2 | ASN 2053 | 101.496 | 85.465 | 85.724 | 0.00 | 0.00 |
| ATOM 30686 | C    | ASN 2053 | 103.295 | 87.747 | 81.142 | 0.00 | 0.00 |
| ATOM 30687 | O    | ASN 2053 | 103.743 | 87.278 | 80.112 | 0.00 | 0.00 |
| ATOM 30688 | N    | THR 2054 | 102.759 | 88.991 | 81.180 | 0.00 | 0.00 |
| ATOM 30689 | H    | THR 2054 | 102.649 | 89.446 | 82.075 | 0.00 | 0.00 |
| ATOM 30690 | CA   | THR 2054 | 102.674 | 89.898 | 79.962 | 0.00 | 0.00 |
| ATOM 30691 | HA   | THR 2054 | 101.926 | 89.383 | 79.359 | 0.00 | 0.00 |
| ATOM 30692 | CB   | THR 2054 | 102.107 | 91.251 | 80.412 | 0.00 | 0.00 |
| ATOM 30693 | HB   | THR 2054 | 102.809 | 91.570 | 81.182 | 0.00 | 0.00 |
| ATOM 30694 | CG2  | THR 2054 | 102.368 | 92.313 | 79.323 | 0.00 | 0.00 |
| ATOM 30695 | 1HG2 | THR 2054 | 103.411 | 92.617 | 79.235 | 0.00 | 0.00 |
| ATOM 30696 | 2HG2 | THR 2054 | 102.136 | 91.868 | 78.356 | 0.00 | 0.00 |
| ATOM 30697 | 3HG2 | THR 2054 | 101.734 | 93.180 | 79.509 | 0.00 | 0.00 |
| ATOM 30698 | OG1  | THR 2054 | 100.741 | 91.168 | 80.736 | 0.00 | 0.00 |
| ATOM 30699 | HG1  | THR 2054 | 100.373 | 92.036 | 80.920 | 0.00 | 0.00 |



|      |       |      |     |      |         |        |        |      |      |
|------|-------|------|-----|------|---------|--------|--------|------|------|
| ATOM | 30700 | C    | THR | 2054 | 103.997 | 90.064 | 79.232 | 0.00 | 0.00 |
| ATOM | 30701 | O    | THR | 2054 | 103.997 | 90.028 | 78.018 | 0.00 | 0.00 |
| ATOM | 30702 | N    | ILE | 2055 | 105.089 | 90.204 | 79.956 | 0.00 | 0.00 |
| ATOM | 30703 | H    | ILE | 2055 | 105.064 | 90.447 | 80.936 | 0.00 | 0.00 |
| ATOM | 30704 | CA   | ILE | 2055 | 106.435 | 90.380 | 79.385 | 0.00 | 0.00 |
| ATOM | 30705 | HA   | ILE | 2055 | 106.195 | 91.016 | 78.533 | 0.00 | 0.00 |
| ATOM | 30706 | CB   | ILE | 2055 | 107.376 | 91.277 | 80.271 | 0.00 | 0.00 |
| ATOM | 30707 | HB   | ILE | 2055 | 108.174 | 91.576 | 79.591 | 0.00 | 0.00 |
| ATOM | 30708 | CG2  | ILE | 2055 | 106.674 | 92.564 | 80.735 | 0.00 | 0.00 |
| ATOM | 30709 | 1HG2 | ILE | 2055 | 107.399 | 93.272 | 81.135 | 0.00 | 0.00 |
| ATOM | 30710 | 2HG2 | ILE | 2055 | 106.447 | 93.071 | 79.797 | 0.00 | 0.00 |
| ATOM | 30711 | 3HG2 | ILE | 2055 | 105.804 | 92.390 | 81.367 | 0.00 | 0.00 |
| ATOM | 30712 | CG1  | ILE | 2055 | 107.908 | 90.600 | 81.518 | 0.00 | 0.00 |
| ATOM | 30713 | 2HG1 | ILE | 2055 | 107.103 | 90.164 | 82.110 | 0.00 | 0.00 |
| ATOM | 30714 | 3HG1 | ILE | 2055 | 108.611 | 89.858 | 81.141 | 0.00 | 0.00 |
| ATOM | 30715 | CD1  | ILE | 2055 | 108.642 | 91.471 | 82.548 | 0.00 | 0.00 |
| ATOM | 30716 | 1HD1 | ILE | 2055 | 109.284 | 90.808 | 83.128 | 0.00 | 0.00 |
| ATOM | 30717 | 2HD1 | ILE | 2055 | 109.333 | 92.121 | 82.010 | 0.00 | 0.00 |
| ATOM | 30718 | 3HD1 | ILE | 2055 | 107.988 | 91.981 | 83.256 | 0.00 | 0.00 |
| ATOM | 30719 | C    | ILE | 2055 | 107.170 | 89.065 | 78.834 | 0.00 | 0.00 |
| ATOM | 30720 | O    | ILE | 2055 | 108.243 | 89.202 | 78.249 | 0.00 | 0.00 |
| ATOM | 30721 | N    | ASP | 2056 | 106.513 | 87.897 | 78.922 | 0.00 | 0.00 |
| ATOM | 30722 | H    | ASP | 2056 | 105.689 | 87.790 | 79.497 | 0.00 | 0.00 |
| ATOM | 30723 | CA   | ASP | 2056 | 107.034 | 86.642 | 78.398 | 0.00 | 0.00 |
| ATOM | 30724 | HA   | ASP | 2056 | 107.908 | 86.845 | 77.779 | 0.00 | 0.00 |
| ATOM | 30725 | CB   | ASP | 2056 | 107.342 | 85.817 | 79.642 | 0.00 | 0.00 |

|      |       |     |     |      |         |        |        |      |      |
|------|-------|-----|-----|------|---------|--------|--------|------|------|
| ATOM | 30726 | HB2 | ASP | 2056 | 107.759 | 86.500 | 80.383 | 0.00 | 0.00 |
| ATOM | 30727 | HB3 | ASP | 2056 | 106.407 | 85.432 | 80.050 | 0.00 | 0.00 |
| ATOM | 30728 | CG  | ASP | 2056 | 108.333 | 84.633 | 79.382 | 0.00 | 0.00 |
| ATOM | 30729 | OD1 | ASP | 2056 | 107.846 | 83.521 | 79.044 | 0.00 | 0.00 |
| ATOM | 30730 | OD2 | ASP | 2056 | 109.505 | 84.801 | 79.690 | 0.00 | 0.00 |
| ATOM | 30731 | C   | ASP | 2056 | 106.023 | 85.962 | 77.440 | 0.00 | 0.00 |
| ATOM | 30732 | O   | ASP | 2056 | 106.408 | 85.166 | 76.628 | 0.00 | 0.00 |
| ATOM | 30733 | N   | GLU | 2057 | 104.677 | 86.171 | 77.465 | 0.00 | 0.00 |
| ATOM | 30734 | H   | GLU | 2057 | 104.303 | 86.720 | 78.226 | 0.00 | 0.00 |
| ATOM | 30735 | CA  | GLU | 2057 | 103.772 | 85.321 | 76.630 | 0.00 | 0.00 |
| ATOM | 30736 | HA  | GLU | 2057 | 104.156 | 84.301 | 76.642 | 0.00 | 0.00 |
| ATOM | 30737 | CB  | GLU | 2057 | 102.399 | 85.245 | 77.194 | 0.00 | 0.00 |
| ATOM | 30738 | HB2 | GLU | 2057 | 101.908 | 84.507 | 76.559 | 0.00 | 0.00 |
| ATOM | 30739 | HB3 | GLU | 2057 | 102.535 | 84.900 | 78.219 | 0.00 | 0.00 |
| ATOM | 30740 | CG  | GLU | 2057 | 101.663 | 86.562 | 77.130 | 0.00 | 0.00 |
| ATOM | 30741 | HG2 | GLU | 2057 | 101.986 | 87.185 | 77.964 | 0.00 | 0.00 |
| ATOM | 30742 | HG3 | GLU | 2057 | 101.972 | 87.192 | 76.296 | 0.00 | 0.00 |
| ATOM | 30743 | CD  | GLU | 2057 | 100.139 | 86.492 | 77.176 | 0.00 | 0.00 |
| ATOM | 30744 | OE1 | GLU | 2057 | 99.529  | 85.399 | 77.222 | 0.00 | 0.00 |
| ATOM | 30745 | OE2 | GLU | 2057 | 99.425  | 87.514 | 77.163 | 0.00 | 0.00 |
| ATOM | 30746 | C   | GLU | 2057 | 103.776 | 85.690 | 75.138 | 0.00 | 0.00 |
| ATOM | 30747 | O   | GLU | 2057 | 103.819 | 84.825 | 74.269 | 0.00 | 0.00 |
| ATOM | 30748 | N   | HID | 2058 | 104.160 | 86.923 | 74.809 | 0.00 | 0.00 |
| ATOM | 30749 | H   | HID | 2058 | 104.452 | 87.497 | 75.587 | 0.00 | 0.00 |
| ATOM | 30750 | CA  | HID | 2058 | 104.256 | 87.513 | 73.499 | 0.00 | 0.00 |
| ATOM | 30751 | HA  | HID | 2058 | 103.328 | 87.438 | 72.933 | 0.00 | 0.00 |

|      |       |      |     |      |         |        |        |      |      |
|------|-------|------|-----|------|---------|--------|--------|------|------|
| ATOM | 30752 | CB   | HID | 2058 | 104.674 | 89.010 | 73.661 | 0.00 | 0.00 |
| ATOM | 30753 | HB2  | HID | 2058 | 105.408 | 89.113 | 74.461 | 0.00 | 0.00 |
| ATOM | 30754 | HB3  | HID | 2058 | 105.056 | 89.460 | 72.744 | 0.00 | 0.00 |
| ATOM | 30755 | CG   | HID | 2058 | 103.437 | 89.862 | 74.043 | 0.00 | 0.00 |
| ATOM | 30756 | ND1  | HID | 2058 | 103.045 | 90.128 | 75.342 | 0.00 | 0.00 |
| ATOM | 30757 | HD1  | HID | 2058 | 103.485 | 89.820 | 76.197 | 0.00 | 0.00 |
| ATOM | 30758 | CE1  | HID | 2058 | 102.050 | 91.060 | 75.319 | 0.00 | 0.00 |
| ATOM | 30759 | HE1  | HID | 2058 | 101.577 | 91.496 | 76.186 | 0.00 | 0.00 |
| ATOM | 30760 | NE2  | HID | 2058 | 101.913 | 91.470 | 74.079 | 0.00 | 0.00 |
| ATOM | 30761 | CD2  | HID | 2058 | 102.698 | 90.649 | 73.247 | 0.00 | 0.00 |
| ATOM | 30762 | HD2  | HID | 2058 | 102.790 | 90.605 | 72.172 | 0.00 | 0.00 |
| ATOM | 30763 | C    | HID | 2058 | 105.292 | 86.760 | 72.553 | 0.00 | 0.00 |
| ATOM | 30764 | O    | HID | 2058 | 105.034 | 86.647 | 71.347 | 0.00 | 0.00 |
| ATOM | 30765 | N    | LEU | 2059 | 106.413 | 86.351 | 73.179 | 0.00 | 0.00 |
| ATOM | 30766 | H    | LEU | 2059 | 106.602 | 86.582 | 74.144 | 0.00 | 0.00 |
| ATOM | 30767 | CA   | LEU | 2059 | 107.494 | 85.714 | 72.396 | 0.00 | 0.00 |
| ATOM | 30768 | HA   | LEU | 2059 | 107.623 | 86.120 | 71.392 | 0.00 | 0.00 |
| ATOM | 30769 | CB   | LEU | 2059 | 108.777 | 85.942 | 73.177 | 0.00 | 0.00 |
| ATOM | 30770 | HB2  | LEU | 2059 | 108.853 | 85.331 | 74.076 | 0.00 | 0.00 |
| ATOM | 30771 | HB3  | LEU | 2059 | 109.570 | 85.569 | 72.528 | 0.00 | 0.00 |
| ATOM | 30772 | CG   | LEU | 2059 | 109.150 | 87.429 | 73.469 | 0.00 | 0.00 |
| ATOM | 30773 | HG   | LEU | 2059 | 108.472 | 87.738 | 74.265 | 0.00 | 0.00 |
| ATOM | 30774 | CD1  | LEU | 2059 | 110.520 | 87.473 | 74.015 | 0.00 | 0.00 |
| ATOM | 30775 | 1HD1 | LEU | 2059 | 110.598 | 86.853 | 74.908 | 0.00 | 0.00 |
| ATOM | 30776 | 2HD1 | LEU | 2059 | 111.160 | 87.072 | 73.229 | 0.00 | 0.00 |
| ATOM | 30777 | 3HD1 | LEU | 2059 | 110.804 | 88.481 | 74.317 | 0.00 | 0.00 |

|            |      |     |      |         |        |        |      |      |
|------------|------|-----|------|---------|--------|--------|------|------|
| ATOM 30778 | CD2  | LEU | 2059 | 109.079 | 88.473 | 72.374 | 0.00 | 0.00 |
| ATOM 30779 | 1HD2 | LEU | 2059 | 109.204 | 89.449 | 72.843 | 0.00 | 0.00 |
| ATOM 30780 | 2HD2 | LEU | 2059 | 109.844 | 88.276 | 71.624 | 0.00 | 0.00 |
| ATOM 30781 | 3HD2 | LEU | 2059 | 108.067 | 88.452 | 71.968 | 0.00 | 0.00 |
| ATOM 30782 | C    | LEU | 2059 | 107.181 | 84.248 | 71.962 | 0.00 | 0.00 |
| ATOM 30783 | O    | LEU | 2059 | 107.836 | 83.711 | 71.064 | 0.00 | 0.00 |
| ATOM 30784 | N    | ASP | 2060 | 106.142 | 83.696 | 72.586 | 0.00 | 0.00 |
| ATOM 30785 | H    | ASP | 2060 | 105.648 | 84.259 | 73.264 | 0.00 | 0.00 |
| ATOM 30786 | CA   | ASP | 2060 | 105.556 | 82.431 | 72.108 | 0.00 | 0.00 |
| ATOM 30787 | HA   | ASP | 2060 | 106.193 | 81.943 | 71.370 | 0.00 | 0.00 |
| ATOM 30788 | CB   | ASP | 2060 | 105.376 | 81.558 | 73.446 | 0.00 | 0.00 |
| ATOM 30789 | HB2  | ASP | 2060 | 104.893 | 82.169 | 74.207 | 0.00 | 0.00 |
| ATOM 30790 | HB3  | ASP | 2060 | 104.778 | 80.682 | 73.195 | 0.00 | 0.00 |
| ATOM 30791 | CG   | ASP | 2060 | 106.801 | 81.296 | 73.910 | 0.00 | 0.00 |
| ATOM 30792 | OD1  | ASP | 2060 | 107.584 | 80.745 | 73.103 | 0.00 | 0.00 |
| ATOM 30793 | OD2  | ASP | 2060 | 107.062 | 81.455 | 75.123 | 0.00 | 0.00 |
| ATOM 30794 | C    | ASP | 2060 | 104.169 | 82.616 | 71.302 | 0.00 | 0.00 |
| ATOM 30795 | O    | ASP | 2060 | 103.910 | 81.868 | 70.369 | 0.00 | 0.00 |
| ATOM 30796 | N    | MET | 2061 | 103.439 | 83.641 | 71.719 | 0.00 | 0.00 |
| ATOM 30797 | H    | MET | 2061 | 103.799 | 84.112 | 72.537 | 0.00 | 0.00 |
| ATOM 30798 | CA   | MET | 2061 | 102.162 | 83.914 | 71.181 | 0.00 | 0.00 |
| ATOM 30799 | HA   | MET | 2061 | 101.418 | 83.136 | 71.354 | 0.00 | 0.00 |
| ATOM 30800 | CB   | MET | 2061 | 101.557 | 85.128 | 71.657 | 0.00 | 0.00 |
| ATOM 30801 | HB2  | MET | 2061 | 101.536 | 85.123 | 72.747 | 0.00 | 0.00 |
| ATOM 30802 | HB3  | MET | 2061 | 102.175 | 85.962 | 71.326 | 0.00 | 0.00 |
| ATOM 30803 | CG   | MET | 2061 | 100.036 | 85.236 | 71.286 | 0.00 | 0.00 |

|            |      |     |      |         |        |        |      |      |
|------------|------|-----|------|---------|--------|--------|------|------|
| ATOM 30804 | HG2  | MET | 2061 | 99.892  | 85.347 | 70.211 | 0.00 | 0.00 |
| ATOM 30805 | HG3  | MET | 2061 | 99.651  | 84.252 | 71.551 | 0.00 | 0.00 |
| ATOM 30806 | SD   | MET | 2061 | 99.097  | 86.582 | 71.919 | 0.00 | 0.00 |
| ATOM 30807 | CE   | MET | 2061 | 99.305  | 86.229 | 73.675 | 0.00 | 0.00 |
| ATOM 30808 | HE1  | MET | 2061 | 98.640  | 86.827 | 74.298 | 0.00 | 0.00 |
| ATOM 30809 | HE2  | MET | 2061 | 99.020  | 85.209 | 73.932 | 0.00 | 0.00 |
| ATOM 30810 | HE3  | MET | 2061 | 100.282 | 86.467 | 74.097 | 0.00 | 0.00 |
| ATOM 30811 | C    | MET | 2061 | 102.177 | 84.054 | 69.632 | 0.00 | 0.00 |
| ATOM 30812 | O    | MET | 2061 | 101.368 | 83.390 | 69.015 | 0.00 | 0.00 |
| ATOM 30813 | N    | LEU | 2062 | 103.063 | 84.822 | 68.984 | 0.00 | 0.00 |
| ATOM 30814 | H    | LEU | 2062 | 103.749 | 85.280 | 69.566 | 0.00 | 0.00 |
| ATOM 30815 | CA   | LEU | 2062 | 103.175 | 84.842 | 67.547 | 0.00 | 0.00 |
| ATOM 30816 | HA   | LEU | 2062 | 102.191 | 84.901 | 67.083 | 0.00 | 0.00 |
| ATOM 30817 | CB   | LEU | 2062 | 104.113 | 85.989 | 67.036 | 0.00 | 0.00 |
| ATOM 30818 | HB2  | LEU | 2062 | 104.030 | 86.047 | 65.951 | 0.00 | 0.00 |
| ATOM 30819 | HB3  | LEU | 2062 | 105.118 | 85.648 | 67.283 | 0.00 | 0.00 |
| ATOM 30820 | CG   | LEU | 2062 | 103.986 | 87.384 | 67.615 | 0.00 | 0.00 |
| ATOM 30821 | HG   | LEU | 2062 | 104.238 | 87.285 | 68.671 | 0.00 | 0.00 |
| ATOM 30822 | CD1  | LEU | 2062 | 104.899 | 88.345 | 66.994 | 0.00 | 0.00 |
| ATOM 30823 | 1HD1 | LEU | 2062 | 105.865 | 87.844 | 66.939 | 0.00 | 0.00 |
| ATOM 30824 | 2HD1 | LEU | 2062 | 104.626 | 88.465 | 65.945 | 0.00 | 0.00 |
| ATOM 30825 | 3HD1 | LEU | 2062 | 104.962 | 89.316 | 67.485 | 0.00 | 0.00 |
| ATOM 30826 | CD2  | LEU | 2062 | 102.551 | 87.829 | 67.470 | 0.00 | 0.00 |
| ATOM 30827 | 1HD2 | LEU | 2062 | 102.502 | 88.878 | 67.764 | 0.00 | 0.00 |
| ATOM 30828 | 2HD2 | LEU | 2062 | 102.253 | 87.745 | 66.425 | 0.00 | 0.00 |
| ATOM 30829 | 3HD2 | LEU | 2062 | 101.893 | 87.319 | 68.173 | 0.00 | 0.00 |

|            |     |     |      |         |        |        |      |      |
|------------|-----|-----|------|---------|--------|--------|------|------|
| ATOM 30830 | C   | LEU | 2062 | 103.878 | 83.520 | 67.082 | 0.00 | 0.00 |
| ATOM 30831 | O   | LEU | 2062 | 103.546 | 83.081 | 65.938 | 0.00 | 0.00 |
| ATOM 30832 | N   | MET | 2063 | 104.847 | 82.925 | 67.897 | 0.00 | 0.00 |
| ATOM 30833 | H   | MET | 2063 | 104.891 | 83.234 | 68.857 | 0.00 | 0.00 |
| ATOM 30834 | CA  | MET | 2063 | 105.629 | 81.735 | 67.427 | 0.00 | 0.00 |
| ATOM 30835 | HA  | MET | 2063 | 106.308 | 82.104 | 66.658 | 0.00 | 0.00 |
| ATOM 30836 | CB  | MET | 2063 | 106.510 | 81.335 | 68.584 | 0.00 | 0.00 |
| ATOM 30837 | HB2 | MET | 2063 | 106.888 | 82.322 | 68.848 | 0.00 | 0.00 |
| ATOM 30838 | HB3 | MET | 2063 | 105.996 | 81.003 | 69.485 | 0.00 | 0.00 |
| ATOM 30839 | CG  | MET | 2063 | 107.815 | 80.459 | 68.365 | 0.00 | 0.00 |
| ATOM 30840 | HG2 | MET | 2063 | 108.407 | 80.782 | 67.509 | 0.00 | 0.00 |
| ATOM 30841 | HG3 | MET | 2063 | 108.506 | 80.471 | 69.208 | 0.00 | 0.00 |
| ATOM 30842 | SD  | MET | 2063 | 107.403 | 78.698 | 68.184 | 0.00 | 0.00 |
| ATOM 30843 | CE  | MET | 2063 | 108.811 | 78.065 | 67.192 | 0.00 | 0.00 |
| ATOM 30844 | HE1 | MET | 2063 | 108.574 | 77.097 | 66.751 | 0.00 | 0.00 |
| ATOM 30845 | HE2 | MET | 2063 | 108.993 | 78.721 | 66.340 | 0.00 | 0.00 |
| ATOM 30846 | HE3 | MET | 2063 | 109.686 | 78.051 | 67.843 | 0.00 | 0.00 |
| ATOM 30847 | C   | MET | 2063 | 104.767 | 80.600 | 66.903 | 0.00 | 0.00 |
| ATOM 30848 | O   | MET | 2063 | 105.173 | 79.926 | 65.915 | 0.00 | 0.00 |
| ATOM 30849 | N   | VAL | 2064 | 103.664 | 80.293 | 67.572 | 0.00 | 0.00 |
| ATOM 30850 | H   | VAL | 2064 | 103.540 | 80.842 | 68.411 | 0.00 | 0.00 |
| ATOM 30851 | CA  | VAL | 2064 | 102.770 | 79.224 | 67.341 | 0.00 | 0.00 |
| ATOM 30852 | HA  | VAL | 2064 | 103.390 | 78.408 | 66.971 | 0.00 | 0.00 |
| ATOM 30853 | CB  | VAL | 2064 | 102.152 | 78.583 | 68.673 | 0.00 | 0.00 |
| ATOM 30854 | HB  | VAL | 2064 | 101.560 | 77.745 | 68.306 | 0.00 | 0.00 |
| ATOM 30855 | CG1 | VAL | 2064 | 103.266 | 78.230 | 69.681 | 0.00 | 0.00 |

|            |      |     |      |         |        |        |      |      |
|------------|------|-----|------|---------|--------|--------|------|------|
| ATOM 30856 | 1HG1 | VAL | 2064 | 102.771 | 77.923 | 70.602 | 0.00 | 0.00 |
| ATOM 30857 | 2HG1 | VAL | 2064 | 103.956 | 77.427 | 69.425 | 0.00 | 0.00 |
| ATOM 30858 | 3HG1 | VAL | 2064 | 103.737 | 79.165 | 69.983 | 0.00 | 0.00 |
| ATOM 30859 | CG2  | VAL | 2064 | 101.244 | 79.463 | 69.532 | 0.00 | 0.00 |
| ATOM 30860 | 1HG2 | VAL | 2064 | 100.613 | 80.010 | 68.831 | 0.00 | 0.00 |
| ATOM 30861 | 2HG2 | VAL | 2064 | 100.534 | 78.874 | 70.114 | 0.00 | 0.00 |
| ATOM 30862 | 3HG2 | VAL | 2064 | 101.791 | 80.275 | 70.011 | 0.00 | 0.00 |
| ATOM 30863 | C    | VAL | 2064 | 101.827 | 79.500 | 66.154 | 0.00 | 0.00 |
| ATOM 30864 | O    | VAL | 2064 | 100.885 | 78.747 | 65.870 | 0.00 | 0.00 |
| ATOM 30865 | N    | CYS | 2065 | 101.928 | 80.621 | 65.413 | 0.00 | 0.00 |
| ATOM 30866 | H    | CYS | 2065 | 102.719 | 81.202 | 65.654 | 0.00 | 0.00 |
| ATOM 30867 | CA   | CYS | 2065 | 101.018 | 81.238 | 64.423 | 0.00 | 0.00 |
| ATOM 30868 | HA   | CYS | 2065 | 100.452 | 80.445 | 63.933 | 0.00 | 0.00 |
| ATOM 30869 | CB   | CYS | 2065 | 100.023 | 82.183 | 65.091 | 0.00 | 0.00 |
| ATOM 30870 | HB2  | CYS | 2065 | 100.633 | 82.930 | 65.598 | 0.00 | 0.00 |
| ATOM 30871 | HB3  | CYS | 2065 | 99.372  | 82.630 | 64.340 | 0.00 | 0.00 |
| ATOM 30872 | SG   | CYS | 2065 | 99.117  | 81.389 | 66.439 | 0.00 | 0.00 |
| ATOM 30873 | HG   | CYS | 2065 | 98.754  | 82.480 | 67.120 | 0.00 | 0.00 |
| ATOM 30874 | C    | CYS | 2065 | 101.820 | 81.849 | 63.318 | 0.00 | 0.00 |
| ATOM 30875 | O    | CYS | 2065 | 101.272 | 82.543 | 62.436 | 0.00 | 0.00 |
| ATOM 30876 | N    | HID | 2066 | 103.184 | 81.689 | 63.292 | 0.00 | 0.00 |
| ATOM 30877 | H    | HID | 2066 | 103.608 | 81.182 | 64.056 | 0.00 | 0.00 |
| ATOM 30878 | CA   | HID | 2066 | 104.118 | 82.073 | 62.248 | 0.00 | 0.00 |
| ATOM 30879 | HA   | HID | 2066 | 103.997 | 83.123 | 61.983 | 0.00 | 0.00 |
| ATOM 30880 | CB   | HID | 2066 | 105.554 | 81.990 | 62.919 | 0.00 | 0.00 |
| ATOM 30881 | HB2  | HID | 2066 | 105.484 | 82.485 | 63.888 | 0.00 | 0.00 |

|      |       |     |     |      |         |        |        |      |      |
|------|-------|-----|-----|------|---------|--------|--------|------|------|
| ATOM | 30882 | HB3 | HID | 2066 | 105.793 | 80.946 | 63.125 | 0.00 | 0.00 |
| ATOM | 30883 | CG  | HID | 2066 | 106.747 | 82.444 | 62.101 | 0.00 | 0.00 |
| ATOM | 30884 | ND1 | HID | 2066 | 106.913 | 83.716 | 61.729 | 0.00 | 0.00 |
| ATOM | 30885 | HD1 | HID | 2066 | 106.242 | 84.471 | 61.748 | 0.00 | 0.00 |
| ATOM | 30886 | CE1 | HID | 2066 | 108.092 | 83.861 | 61.083 | 0.00 | 0.00 |
| ATOM | 30887 | HE1 | HID | 2066 | 108.429 | 84.724 | 60.528 | 0.00 | 0.00 |
| ATOM | 30888 | NE2 | HID | 2066 | 108.846 | 82.795 | 61.357 | 0.00 | 0.00 |
| ATOM | 30889 | CD2 | HID | 2066 | 107.996 | 81.857 | 62.012 | 0.00 | 0.00 |
| ATOM | 30890 | HD2 | HID | 2066 | 108.371 | 80.908 | 62.366 | 0.00 | 0.00 |
| ATOM | 30891 | C   | HID | 2066 | 104.070 | 81.204 | 60.941 | 0.00 | 0.00 |
| ATOM | 30892 | O   | HID | 2066 | 104.415 | 81.787 | 59.915 | 0.00 | 0.00 |
| ATOM | 30893 | N   | HIE | 2067 | 103.545 | 80.030 | 60.985 | 0.00 | 0.00 |
| ATOM | 30894 | H   | HIE | 2067 | 103.256 | 79.632 | 61.868 | 0.00 | 0.00 |
| ATOM | 30895 | CA  | HIE | 2067 | 103.396 | 79.111 | 59.818 | 0.00 | 0.00 |
| ATOM | 30896 | HA  | HIE | 2067 | 103.213 | 78.168 | 60.334 | 0.00 | 0.00 |
| ATOM | 30897 | CB  | HIE | 2067 | 102.156 | 79.463 | 59.011 | 0.00 | 0.00 |
| ATOM | 30898 | HB2 | HIE | 2067 | 102.284 | 80.351 | 58.391 | 0.00 | 0.00 |
| ATOM | 30899 | HB3 | HIE | 2067 | 101.924 | 78.540 | 58.479 | 0.00 | 0.00 |
| ATOM | 30900 | CG  | HIE | 2067 | 100.966 | 79.635 | 59.890 | 0.00 | 0.00 |
| ATOM | 30901 | ND1 | HIE | 2067 | 100.175 | 78.530 | 60.306 | 0.00 | 0.00 |
| ATOM | 30902 | CE1 | HIE | 2067 | 99.130  | 79.134 | 60.824 | 0.00 | 0.00 |
| ATOM | 30903 | HE1 | HIE | 2067 | 98.311  | 78.553 | 61.222 | 0.00 | 0.00 |
| ATOM | 30904 | NE2 | HIE | 2067 | 99.165  | 80.467 | 60.745 | 0.00 | 0.00 |
| ATOM | 30905 | HE2 | HIE | 2067 | 98.351  | 81.057 | 60.838 | 0.00 | 0.00 |
| ATOM | 30906 | CD2 | HIE | 2067 | 100.369 | 80.792 | 60.153 | 0.00 | 0.00 |
| ATOM | 30907 | HD2 | HIE | 2067 | 100.706 | 81.771 | 59.847 | 0.00 | 0.00 |



|            |      |     |      |         |        |        |      |      |
|------------|------|-----|------|---------|--------|--------|------|------|
| ATOM 30908 | C    | HIE | 2067 | 104.688 | 78.827 | 58.973 | 0.00 | 0.00 |
| ATOM 30909 | O    | HIE | 2067 | 104.618 | 78.427 | 57.805 | 0.00 | 0.00 |
| ATOM 30910 | N    | LEU | 2068 | 105.799 | 79.063 | 59.646 | 0.00 | 0.00 |
| ATOM 30911 | H    | LEU | 2068 | 105.795 | 79.447 | 60.580 | 0.00 | 0.00 |
| ATOM 30912 | CA   | LEU | 2068 | 107.114 | 78.773 | 59.142 | 0.00 | 0.00 |
| ATOM 30913 | HA   | LEU | 2068 | 107.184 | 77.990 | 58.386 | 0.00 | 0.00 |
| ATOM 30914 | CB   | LEU | 2068 | 107.669 | 80.023 | 58.428 | 0.00 | 0.00 |
| ATOM 30915 | HB2  | LEU | 2068 | 106.988 | 80.152 | 57.587 | 0.00 | 0.00 |
| ATOM 30916 | HB3  | LEU | 2068 | 107.478 | 80.837 | 59.128 | 0.00 | 0.00 |
| ATOM 30917 | CG   | LEU | 2068 | 109.109 | 79.927 | 57.957 | 0.00 | 0.00 |
| ATOM 30918 | HG   | LEU | 2068 | 109.485 | 78.913 | 57.815 | 0.00 | 0.00 |
| ATOM 30919 | CD1  | LEU | 2068 | 109.235 | 80.577 | 56.546 | 0.00 | 0.00 |
| ATOM 30920 | 1HD1 | LEU | 2068 | 109.028 | 81.644 | 56.632 | 0.00 | 0.00 |
| ATOM 30921 | 2HD1 | LEU | 2068 | 110.214 | 80.525 | 56.069 | 0.00 | 0.00 |
| ATOM 30922 | 3HD1 | LEU | 2068 | 108.475 | 80.117 | 55.913 | 0.00 | 0.00 |
| ATOM 30923 | CD2  | LEU | 2068 | 110.216 | 80.591 | 58.783 | 0.00 | 0.00 |
| ATOM 30924 | 1HD2 | LEU | 2068 | 111.220 | 80.433 | 58.389 | 0.00 | 0.00 |
| ATOM 30925 | 2HD2 | LEU | 2068 | 110.019 | 81.662 | 58.845 | 0.00 | 0.00 |
| ATOM 30926 | 3HD2 | LEU | 2068 | 110.275 | 80.159 | 59.782 | 0.00 | 0.00 |
| ATOM 30927 | C    | LEU | 2068 | 108.005 | 78.392 | 60.365 | 0.00 | 0.00 |
| ATOM 30928 | O    | LEU | 2068 | 107.788 | 78.898 | 61.499 | 0.00 | 0.00 |
| ATOM 30929 | N    | ASP | 2069 | 108.883 | 77.413 | 60.140 | 0.00 | 0.00 |
| ATOM 30930 | H    | ASP | 2069 | 108.812 | 77.088 | 59.187 | 0.00 | 0.00 |
| ATOM 30931 | CA   | ASP | 2069 | 109.868 | 76.888 | 61.100 | 0.00 | 0.00 |
| ATOM 30932 | HA   | ASP | 2069 | 109.438 | 76.854 | 62.100 | 0.00 | 0.00 |
| ATOM 30933 | CB   | ASP | 2069 | 110.233 | 75.427 | 60.757 | 0.00 | 0.00 |

|            |              |         |        |        |      |      |
|------------|--------------|---------|--------|--------|------|------|
| ATOM 30934 | HB2 ASP 2069 | 110.885 | 75.342 | 59.887 | 0.00 | 0.00 |
| ATOM 30935 | HB3 ASP 2069 | 109.293 | 74.992 | 60.419 | 0.00 | 0.00 |
| ATOM 30936 | CG ASP 2069  | 110.796 | 74.648 | 61.948 | 0.00 | 0.00 |
| ATOM 30937 | OD1 ASP 2069 | 110.025 | 74.232 | 62.834 | 0.00 | 0.00 |
| ATOM 30938 | OD2 ASP 2069 | 112.002 | 74.350 | 62.012 | 0.00 | 0.00 |
| ATOM 30939 | C ASP 2069   | 111.148 | 77.782 | 61.215 | 0.00 | 0.00 |
| ATOM 30940 | O ASP 2069   | 111.713 | 78.088 | 60.159 | 0.00 | 0.00 |
| ATOM 30941 | N PRO 2070   | 111.560 | 78.229 | 62.424 | 0.00 | 0.00 |
| ATOM 30942 | CD PRO 2070  | 110.848 | 78.178 | 63.732 | 0.00 | 0.00 |
| ATOM 30943 | HD2 PRO 2070 | 109.815 | 78.479 | 63.559 | 0.00 | 0.00 |
| ATOM 30944 | HD3 PRO 2070 | 110.828 | 77.135 | 64.047 | 0.00 | 0.00 |
| ATOM 30945 | CG PRO 2070  | 111.453 | 79.164 | 64.693 | 0.00 | 0.00 |
| ATOM 30946 | HG2 PRO 2070 | 110.766 | 80.010 | 64.651 | 0.00 | 0.00 |
| ATOM 30947 | HG3 PRO 2070 | 111.416 | 78.713 | 65.684 | 0.00 | 0.00 |
| ATOM 30948 | CB PRO 2070  | 112.866 | 79.361 | 64.128 | 0.00 | 0.00 |
| ATOM 30949 | HB2 PRO 2070 | 113.082 | 80.428 | 64.181 | 0.00 | 0.00 |
| ATOM 30950 | HB3 PRO 2070 | 113.585 | 78.851 | 64.769 | 0.00 | 0.00 |
| ATOM 30951 | CA PRO 2070  | 112.886 | 78.838 | 62.637 | 0.00 | 0.00 |
| ATOM 30952 | HA PRO 2070  | 113.029 | 79.707 | 61.995 | 0.00 | 0.00 |
| ATOM 30953 | C PRO 2070   | 114.018 | 77.876 | 62.327 | 0.00 | 0.00 |
| ATOM 30954 | O PRO 2070   | 113.905 | 76.710 | 62.638 | 0.00 | 0.00 |
| ATOM 30955 | N ASP 2071   | 115.082 | 78.434 | 61.823 | 0.00 | 0.00 |
| ATOM 30956 | H ASP 2071   | 115.118 | 79.437 | 61.705 | 0.00 | 0.00 |
| ATOM 30957 | CA ASP 2071  | 116.262 | 77.762 | 61.451 | 0.00 | 0.00 |
| ATOM 30958 | HA ASP 2071  | 116.177 | 76.763 | 61.023 | 0.00 | 0.00 |
| ATOM 30959 | CB ASP 2071  | 116.941 | 78.678 | 60.434 | 0.00 | 0.00 |

|      |       |      |     |      |         |        |        |      |      |
|------|-------|------|-----|------|---------|--------|--------|------|------|
| ATOM | 30960 | HB2  | ASP | 2071 | 116.170 | 78.926 | 59.705 | 0.00 | 0.00 |
| ATOM | 30961 | HB3  | ASP | 2071 | 117.354 | 79.523 | 60.987 | 0.00 | 0.00 |
| ATOM | 30962 | CG   | ASP | 2071 | 117.926 | 77.987 | 59.534 | 0.00 | 0.00 |
| ATOM | 30963 | OD1  | ASP | 2071 | 119.091 | 78.313 | 59.731 | 0.00 | 0.00 |
| ATOM | 30964 | OD2  | ASP | 2071 | 117.625 | 77.214 | 58.631 | 0.00 | 0.00 |
| ATOM | 30965 | C    | ASP | 2071 | 117.232 | 77.439 | 62.621 | 0.00 | 0.00 |
| ATOM | 30966 | O    | ASP | 2071 | 117.837 | 76.374 | 62.569 | 0.00 | 0.00 |
| ATOM | 30967 | N    | ILE | 2072 | 117.312 | 78.243 | 63.654 | 0.00 | 0.00 |
| ATOM | 30968 | H    | ILE | 2072 | 116.721 | 79.063 | 63.644 | 0.00 | 0.00 |
| ATOM | 30969 | CA   | ILE | 2072 | 118.183 | 78.014 | 64.787 | 0.00 | 0.00 |
| ATOM | 30970 | HA   | ILE | 2072 | 118.599 | 77.019 | 64.944 | 0.00 | 0.00 |
| ATOM | 30971 | CB   | ILE | 2072 | 119.497 | 78.887 | 64.682 | 0.00 | 0.00 |
| ATOM | 30972 | HB   | ILE | 2072 | 120.169 | 78.613 | 65.496 | 0.00 | 0.00 |
| ATOM | 30973 | CG2  | ILE | 2072 | 120.220 | 78.605 | 63.307 | 0.00 | 0.00 |
| ATOM | 30974 | 1HG2 | ILE | 2072 | 121.271 | 78.840 | 63.474 | 0.00 | 0.00 |
| ATOM | 30975 | 2HG2 | ILE | 2072 | 120.360 | 77.559 | 63.032 | 0.00 | 0.00 |
| ATOM | 30976 | 3HG2 | ILE | 2072 | 119.724 | 79.183 | 62.527 | 0.00 | 0.00 |
| ATOM | 30977 | CG1  | ILE | 2072 | 119.226 | 80.426 | 64.914 | 0.00 | 0.00 |
| ATOM | 30978 | 2HG1 | ILE | 2072 | 118.202 | 80.723 | 64.689 | 0.00 | 0.00 |
| ATOM | 30979 | 3HG1 | ILE | 2072 | 119.380 | 80.622 | 65.976 | 0.00 | 0.00 |
| ATOM | 30980 | CD1  | ILE | 2072 | 120.077 | 81.456 | 64.215 | 0.00 | 0.00 |
| ATOM | 30981 | 1HD1 | ILE | 2072 | 120.061 | 81.231 | 63.148 | 0.00 | 0.00 |
| ATOM | 30982 | 2HD1 | ILE | 2072 | 119.670 | 82.445 | 64.425 | 0.00 | 0.00 |
| ATOM | 30983 | 3HD1 | ILE | 2072 | 121.123 | 81.436 | 64.523 | 0.00 | 0.00 |
| ATOM | 30984 | C    | ILE | 2072 | 117.535 | 78.278 | 66.190 | 0.00 | 0.00 |
| ATOM | 30985 | O    | ILE | 2072 | 116.492 | 78.987 | 66.197 | 0.00 | 0.00 |

|            |     |     |      |         |        |        |      |      |
|------------|-----|-----|------|---------|--------|--------|------|------|
| ATOM 30986 | N   | ALA | 2073 | 117.984 | 77.617 | 67.245 | 0.00 | 0.00 |
| ATOM 30987 | H   | ALA | 2073 | 118.745 | 76.958 | 67.174 | 0.00 | 0.00 |
| ATOM 30988 | CA  | ALA | 2073 | 117.294 | 77.587 | 68.591 | 0.00 | 0.00 |
| ATOM 30989 | HA  | ALA | 2073 | 116.230 | 77.655 | 68.366 | 0.00 | 0.00 |
| ATOM 30990 | CB  | ALA | 2073 | 117.428 | 76.256 | 69.224 | 0.00 | 0.00 |
| ATOM 30991 | HB1 | ALA | 2073 | 117.230 | 75.512 | 68.452 | 0.00 | 0.00 |
| ATOM 30992 | HB2 | ALA | 2073 | 118.463 | 76.199 | 69.562 | 0.00 | 0.00 |
| ATOM 30993 | HB3 | ALA | 2073 | 116.804 | 76.187 | 70.114 | 0.00 | 0.00 |
| ATOM 30994 | C   | ALA | 2073 | 117.580 | 78.834 | 69.387 | 0.00 | 0.00 |
| ATOM 30995 | O   | ALA | 2073 | 116.600 | 79.390 | 69.912 | 0.00 | 0.00 |
| ATOM 30996 | N   | GLU | 2074 | 118.755 | 79.416 | 69.368 | 0.00 | 0.00 |
| ATOM 30997 | H   | GLU | 2074 | 119.550 | 78.965 | 68.939 | 0.00 | 0.00 |
| ATOM 30998 | CA  | GLU | 2074 | 118.981 | 80.586 | 70.185 | 0.00 | 0.00 |
| ATOM 30999 | HA  | GLU | 2074 | 118.277 | 80.474 | 71.010 | 0.00 | 0.00 |
| ATOM 31000 | CB  | GLU | 2074 | 120.386 | 80.605 | 70.760 | 0.00 | 0.00 |
| ATOM 31001 | HB2 | GLU | 2074 | 121.150 | 80.493 | 69.991 | 0.00 | 0.00 |
| ATOM 31002 | HB3 | GLU | 2074 | 120.535 | 81.600 | 71.180 | 0.00 | 0.00 |
| ATOM 31003 | CG  | GLU | 2074 | 120.584 | 79.558 | 71.795 | 0.00 | 0.00 |
| ATOM 31004 | HG2 | GLU | 2074 | 119.699 | 79.567 | 72.431 | 0.00 | 0.00 |
| ATOM 31005 | HG3 | GLU | 2074 | 120.532 | 78.533 | 71.430 | 0.00 | 0.00 |
| ATOM 31006 | CD  | GLU | 2074 | 121.831 | 79.761 | 72.643 | 0.00 | 0.00 |
| ATOM 31007 | OE1 | GLU | 2074 | 121.786 | 80.107 | 73.830 | 0.00 | 0.00 |
| ATOM 31008 | OE2 | GLU | 2074 | 122.965 | 79.476 | 72.157 | 0.00 | 0.00 |
| ATOM 31009 | C   | GLU | 2074 | 118.607 | 81.966 | 69.566 | 0.00 | 0.00 |
| ATOM 31010 | O   | GLU | 2074 | 119.029 | 83.045 | 70.028 | 0.00 | 0.00 |
| ATOM 31011 | N   | ASP | 2075 | 117.789 | 81.963 | 68.512 | 0.00 | 0.00 |

|      |       |      |     |      |         |        |        |      |      |
|------|-------|------|-----|------|---------|--------|--------|------|------|
| ATOM | 31012 | H    | ASP | 2075 | 117.500 | 81.062 | 68.160 | 0.00 | 0.00 |
| ATOM | 31013 | CA   | ASP | 2075 | 117.106 | 83.096 | 67.932 | 0.00 | 0.00 |
| ATOM | 31014 | HA   | ASP | 2075 | 117.610 | 84.056 | 68.045 | 0.00 | 0.00 |
| ATOM | 31015 | CB   | ASP | 2075 | 117.165 | 82.906 | 66.416 | 0.00 | 0.00 |
| ATOM | 31016 | HB2  | ASP | 2075 | 118.188 | 82.836 | 66.047 | 0.00 | 0.00 |
| ATOM | 31017 | HB3  | ASP | 2075 | 116.656 | 81.985 | 66.132 | 0.00 | 0.00 |
| ATOM | 31018 | CG   | ASP | 2075 | 116.396 | 83.958 | 65.581 | 0.00 | 0.00 |
| ATOM | 31019 | OD1  | ASP | 2075 | 116.868 | 85.110 | 65.561 | 0.00 | 0.00 |
| ATOM | 31020 | OD2  | ASP | 2075 | 115.543 | 83.519 | 64.766 | 0.00 | 0.00 |
| ATOM | 31021 | C    | ASP | 2075 | 115.562 | 83.153 | 68.287 | 0.00 | 0.00 |
| ATOM | 31022 | O    | ASP | 2075 | 114.933 | 82.080 | 68.428 | 0.00 | 0.00 |
| ATOM | 31023 | N    | VAL | 2076 | 115.048 | 84.408 | 68.271 | 0.00 | 0.00 |
| ATOM | 31024 | H    | VAL | 2076 | 115.711 | 85.169 | 68.240 | 0.00 | 0.00 |
| ATOM | 31025 | CA   | VAL | 2076 | 113.593 | 84.719 | 68.168 | 0.00 | 0.00 |
| ATOM | 31026 | HA   | VAL | 2076 | 113.148 | 83.804 | 67.775 | 0.00 | 0.00 |
| ATOM | 31027 | CB   | VAL | 2076 | 112.882 | 85.053 | 69.530 | 0.00 | 0.00 |
| ATOM | 31028 | HB   | VAL | 2076 | 111.842 | 85.351 | 69.396 | 0.00 | 0.00 |
| ATOM | 31029 | CG1  | VAL | 2076 | 112.943 | 83.968 | 70.560 | 0.00 | 0.00 |
| ATOM | 31030 | 1HG1 | VAL | 2076 | 112.663 | 84.297 | 71.561 | 0.00 | 0.00 |
| ATOM | 31031 | 2HG1 | VAL | 2076 | 112.293 | 83.114 | 70.370 | 0.00 | 0.00 |
| ATOM | 31032 | 3HG1 | VAL | 2076 | 113.970 | 83.606 | 70.599 | 0.00 | 0.00 |
| ATOM | 31033 | CG2  | VAL | 2076 | 113.510 | 86.314 | 70.139 | 0.00 | 0.00 |
| ATOM | 31034 | 1HG2 | VAL | 2076 | 114.592 | 86.188 | 70.167 | 0.00 | 0.00 |
| ATOM | 31035 | 2HG2 | VAL | 2076 | 113.164 | 87.130 | 69.504 | 0.00 | 0.00 |
| ATOM | 31036 | 3HG2 | VAL | 2076 | 113.152 | 86.542 | 71.143 | 0.00 | 0.00 |
| ATOM | 31037 | C    | VAL | 2076 | 113.197 | 85.747 | 67.121 | 0.00 | 0.00 |

|            |     |     |      |         |        |        |      |      |
|------------|-----|-----|------|---------|--------|--------|------|------|
| ATOM 31038 | O   | VAL | 2076 | 112.447 | 86.696 | 67.340 | 0.00 | 0.00 |
| ATOM 31039 | N   | ALA | 2077 | 113.683 | 85.581 | 65.861 | 0.00 | 0.00 |
| ATOM 31040 | H   | ALA | 2077 | 114.255 | 84.783 | 65.622 | 0.00 | 0.00 |
| ATOM 31041 | CA  | ALA | 2077 | 113.290 | 86.514 | 64.760 | 0.00 | 0.00 |
| ATOM 31042 | HA  | ALA | 2077 | 113.728 | 87.473 | 65.036 | 0.00 | 0.00 |
| ATOM 31043 | CB  | ALA | 2077 | 114.088 | 86.008 | 63.568 | 0.00 | 0.00 |
| ATOM 31044 | HB1 | ALA | 2077 | 115.111 | 86.072 | 63.938 | 0.00 | 0.00 |
| ATOM 31045 | HB2 | ALA | 2077 | 113.926 | 84.996 | 63.197 | 0.00 | 0.00 |
| ATOM 31046 | HB3 | ALA | 2077 | 113.873 | 86.680 | 62.738 | 0.00 | 0.00 |
| ATOM 31047 | C   | ALA | 2077 | 111.797 | 86.793 | 64.552 | 0.00 | 0.00 |
| ATOM 31048 | O   | ALA | 2077 | 111.441 | 87.980 | 64.402 | 0.00 | 0.00 |
| ATOM 31049 | N   | PHE | 2078 | 110.989 | 85.775 | 64.521 | 0.00 | 0.00 |
| ATOM 31050 | H   | PHE | 2078 | 111.444 | 84.874 | 64.562 | 0.00 | 0.00 |
| ATOM 31051 | CA  | PHE | 2078 | 109.547 | 85.829 | 64.413 | 0.00 | 0.00 |
| ATOM 31052 | HA  | PHE | 2078 | 109.142 | 85.931 | 63.406 | 0.00 | 0.00 |
| ATOM 31053 | CB  | PHE | 2078 | 108.977 | 84.461 | 64.718 | 0.00 | 0.00 |
| ATOM 31054 | HB2 | PHE | 2078 | 107.889 | 84.428 | 64.774 | 0.00 | 0.00 |
| ATOM 31055 | HB3 | PHE | 2078 | 109.121 | 83.920 | 63.783 | 0.00 | 0.00 |
| ATOM 31056 | CG  | PHE | 2078 | 109.697 | 83.607 | 65.715 | 0.00 | 0.00 |
| ATOM 31057 | CD1 | PHE | 2078 | 109.359 | 83.680 | 67.061 | 0.00 | 0.00 |
| ATOM 31058 | HD1 | PHE | 2078 | 108.649 | 84.428 | 67.382 | 0.00 | 0.00 |
| ATOM 31059 | CE1 | PHE | 2078 | 110.126 | 82.971 | 67.974 | 0.00 | 0.00 |
| ATOM 31060 | HE1 | PHE | 2078 | 109.893 | 83.034 | 69.027 | 0.00 | 0.00 |
| ATOM 31061 | CZ  | PHE | 2078 | 111.200 | 82.130 | 67.567 | 0.00 | 0.00 |
| ATOM 31062 | HZ  | PHE | 2078 | 111.643 | 81.520 | 68.340 | 0.00 | 0.00 |
| ATOM 31063 | CE2 | PHE | 2078 | 111.602 | 82.096 | 66.205 | 0.00 | 0.00 |

|      |       |     |     |      |         |        |        |      |      |
|------|-------|-----|-----|------|---------|--------|--------|------|------|
| ATOM | 31064 | HE2 | PHE | 2078 | 112.399 | 81.434 | 65.900 | 0.00 | 0.00 |
| ATOM | 31065 | CD2 | PHE | 2078 | 110.775 | 82.832 | 65.267 | 0.00 | 0.00 |
| ATOM | 31066 | HD2 | PHE | 2078 | 111.199 | 82.874 | 64.275 | 0.00 | 0.00 |
| ATOM | 31067 | C   | PHE | 2078 | 108.939 | 86.918 | 65.358 | 0.00 | 0.00 |
| ATOM | 31068 | O   | PHE | 2078 | 108.149 | 87.718 | 64.964 | 0.00 | 0.00 |
| ATOM | 31069 | N   | ALA | 2079 | 109.404 | 87.002 | 66.636 | 0.00 | 0.00 |
| ATOM | 31070 | H   | ALA | 2079 | 110.197 | 86.410 | 66.841 | 0.00 | 0.00 |
| ATOM | 31071 | CA  | ALA | 2079 | 108.979 | 87.921 | 67.680 | 0.00 | 0.00 |
| ATOM | 31072 | HA  | ALA | 2079 | 107.918 | 88.091 | 67.496 | 0.00 | 0.00 |
| ATOM | 31073 | CB  | ALA | 2079 | 109.043 | 87.167 | 69.038 | 0.00 | 0.00 |
| ATOM | 31074 | HB1 | ALA | 2079 | 110.061 | 86.925 | 69.346 | 0.00 | 0.00 |
| ATOM | 31075 | HB2 | ALA | 2079 | 108.617 | 87.874 | 69.749 | 0.00 | 0.00 |
| ATOM | 31076 | HB3 | ALA | 2079 | 108.431 | 86.269 | 68.961 | 0.00 | 0.00 |
| ATOM | 31077 | C   | ALA | 2079 | 109.851 | 89.161 | 67.589 | 0.00 | 0.00 |
| ATOM | 31078 | O   | ALA | 2079 | 109.263 | 90.266 | 67.675 | 0.00 | 0.00 |
| ATOM | 31079 | N   | GLU | 2080 | 111.197 | 89.192 | 67.536 | 0.00 | 0.00 |
| ATOM | 31080 | H   | GLU | 2080 | 111.663 | 88.297 | 67.577 | 0.00 | 0.00 |
| ATOM | 31081 | CA  | GLU | 2080 | 112.098 | 90.394 | 67.504 | 0.00 | 0.00 |
| ATOM | 31082 | HA  | GLU | 2080 | 111.902 | 90.932 | 68.432 | 0.00 | 0.00 |
| ATOM | 31083 | CB  | GLU | 2080 | 113.557 | 89.873 | 67.685 | 0.00 | 0.00 |
| ATOM | 31084 | HB2 | GLU | 2080 | 113.603 | 89.435 | 68.682 | 0.00 | 0.00 |
| ATOM | 31085 | HB3 | GLU | 2080 | 113.870 | 89.193 | 66.893 | 0.00 | 0.00 |
| ATOM | 31086 | CG  | GLU | 2080 | 114.544 | 90.999 | 67.703 | 0.00 | 0.00 |
| ATOM | 31087 | HG2 | GLU | 2080 | 114.790 | 91.397 | 66.719 | 0.00 | 0.00 |
| ATOM | 31088 | HG3 | GLU | 2080 | 114.199 | 91.823 | 68.327 | 0.00 | 0.00 |
| ATOM | 31089 | CD  | GLU | 2080 | 115.829 | 90.550 | 68.304 | 0.00 | 0.00 |

|      |       |     |     |      |         |        |        |      |      |
|------|-------|-----|-----|------|---------|--------|--------|------|------|
| ATOM | 31090 | OE1 | GLU | 2080 | 116.724 | 90.185 | 67.510 | 0.00 | 0.00 |
| ATOM | 31091 | OE2 | GLU | 2080 | 116.063 | 90.680 | 69.520 | 0.00 | 0.00 |
| ATOM | 31092 | C   | GLU | 2080 | 111.870 | 91.292 | 66.335 | 0.00 | 0.00 |
| ATOM | 31093 | O   | GLU | 2080 | 112.357 | 92.389 | 66.313 | 0.00 | 0.00 |
| ATOM | 31094 | N   | SER | 2081 | 111.273 | 90.803 | 65.220 | 0.00 | 0.00 |
| ATOM | 31095 | H   | SER | 2081 | 111.086 | 89.817 | 65.109 | 0.00 | 0.00 |
| ATOM | 31096 | CA  | SER | 2081 | 110.840 | 91.633 | 64.099 | 0.00 | 0.00 |
| ATOM | 31097 | HA  | SER | 2081 | 111.694 | 92.306 | 64.029 | 0.00 | 0.00 |
| ATOM | 31098 | CB  | SER | 2081 | 110.829 | 90.751 | 62.831 | 0.00 | 0.00 |
| ATOM | 31099 | HB2 | SER | 2081 | 109.901 | 90.183 | 62.891 | 0.00 | 0.00 |
| ATOM | 31100 | HB3 | SER | 2081 | 110.642 | 91.401 | 61.976 | 0.00 | 0.00 |
| ATOM | 31101 | OG  | SER | 2081 | 111.891 | 89.839 | 62.576 | 0.00 | 0.00 |
| ATOM | 31102 | HG  | SER | 2081 | 111.617 | 89.070 | 63.081 | 0.00 | 0.00 |
| ATOM | 31103 | C   | SER | 2081 | 109.484 | 92.398 | 64.353 | 0.00 | 0.00 |
| ATOM | 31104 | O   | SER | 2081 | 108.969 | 92.892 | 63.374 | 0.00 | 0.00 |
| ATOM | 31105 | N   | ARG | 2082 | 108.865 | 92.411 | 65.550 | 0.00 | 0.00 |
| ATOM | 31106 | H   | ARG | 2082 | 109.405 | 91.898 | 66.232 | 0.00 | 0.00 |
| ATOM | 31107 | CA  | ARG | 2082 | 107.529 | 92.945 | 65.827 | 0.00 | 0.00 |
| ATOM | 31108 | HA  | ARG | 2082 | 107.363 | 93.858 | 65.255 | 0.00 | 0.00 |
| ATOM | 31109 | CB  | ARG | 2082 | 106.578 | 91.877 | 65.356 | 0.00 | 0.00 |
| ATOM | 31110 | HB2 | ARG | 2082 | 106.855 | 90.846 | 65.578 | 0.00 | 0.00 |
| ATOM | 31111 | HB3 | ARG | 2082 | 106.619 | 92.025 | 64.277 | 0.00 | 0.00 |
| ATOM | 31112 | CG  | ARG | 2082 | 105.104 | 92.011 | 65.822 | 0.00 | 0.00 |
| ATOM | 31113 | HG2 | ARG | 2082 | 105.083 | 91.660 | 66.854 | 0.00 | 0.00 |
| ATOM | 31114 | HG3 | ARG | 2082 | 104.903 | 93.082 | 65.827 | 0.00 | 0.00 |
| ATOM | 31115 | CD  | ARG | 2082 | 104.040 | 91.276 | 64.924 | 0.00 | 0.00 |



ATOM 31116 HD2 ARG 2082 103.876 91.842 64.007 0.00 0.00  
ATOM 31117 HD3 ARG 2082 104.431 90.286 64.691 0.00 0.00  
ATOM 31118 NE ARG 2082 102.774 91.158 65.638 0.00 0.00  
ATOM 31119 HE ARG 2082 102.677 91.533 66.571 0.00 0.00  
ATOM 31120 CZ ARG 2082 101.662 90.629 65.137 0.00 0.00  
ATOM 31121 NH1 ARG 2082 101.729 90.024 63.947 0.00 0.00  
ATOM 31122 1HH1 ARG 2082 100.898 89.607 63.553 0.00 0.00  
ATOM 31123 2HH1 ARG 2082 102.538 89.884 63.360 0.00 0.00  
ATOM 31124 NH2 ARG 2082 100.568 90.752 65.785 0.00 0.00  
ATOM 31125 1HH2 ARG 2082 99.696 90.366 65.452 0.00 0.00  
ATOM 31126 2HH2 ARG 2082 100.573 91.171 66.704 0.00 0.00  
ATOM 31127 C ARG 2082 107.358 93.268 67.304 0.00 0.00  
ATOM 31128 O ARG 2082 106.992 94.437 67.581 0.00 0.00  
ATOM 31129 N ILE 2083 107.643 92.407 68.300 0.00 0.00  
ATOM 31130 H ILE 2083 108.021 91.501 68.062 0.00 0.00  
ATOM 31131 CA ILE 2083 107.534 92.802 69.696 0.00 0.00  
ATOM 31132 HA ILE 2083 106.685 93.476 69.805 0.00 0.00  
ATOM 31133 CB ILE 2083 107.314 91.619 70.700 0.00 0.00  
ATOM 31134 HB ILE 2083 108.283 91.119 70.721 0.00 0.00  
ATOM 31135 CG2 ILE 2083 107.070 92.115 72.131 0.00 0.00  
ATOM 31136 1HG2 ILE 2083 106.409 91.455 72.692 0.00 0.00  
ATOM 31137 2HG2 ILE 2083 108.051 92.253 72.587 0.00 0.00  
ATOM 31138 3HG2 ILE 2083 106.623 93.105 72.038 0.00 0.00  
ATOM 31139 CG1 ILE 2083 106.289 90.651 70.212 0.00 0.00  
ATOM 31140 2HG1 ILE 2083 106.731 90.089 69.389 0.00 0.00  
ATOM 31141 3HG1 ILE 2083 106.096 89.829 70.901 0.00 0.00

|      |       |      |     |      |         |        |        |      |      |
|------|-------|------|-----|------|---------|--------|--------|------|------|
| ATOM | 31142 | CD1  | ILE | 2083 | 104.838 | 91.149 | 69.878 | 0.00 | 0.00 |
| ATOM | 31143 | 1HD1 | ILE | 2083 | 104.294 | 90.325 | 69.416 | 0.00 | 0.00 |
| ATOM | 31144 | 2HD1 | ILE | 2083 | 104.358 | 91.478 | 70.800 | 0.00 | 0.00 |
| ATOM | 31145 | 3HD1 | ILE | 2083 | 104.879 | 91.965 | 69.157 | 0.00 | 0.00 |
| ATOM | 31146 | C    | ILE | 2083 | 108.830 | 93.577 | 70.114 | 0.00 | 0.00 |
| ATOM | 31147 | O    | ILE | 2083 | 109.924 | 93.224 | 69.667 | 0.00 | 0.00 |
| ATOM | 31148 | N    | ARG | 2084 | 108.673 | 94.670 | 70.908 | 0.00 | 0.00 |
| ATOM | 31149 | H    | ARG | 2084 | 107.729 | 94.989 | 71.073 | 0.00 | 0.00 |
| ATOM | 31150 | CA   | ARG | 2084 | 109.702 | 95.323 | 71.798 | 0.00 | 0.00 |
| ATOM | 31151 | HA   | ARG | 2084 | 110.646 | 94.786 | 71.706 | 0.00 | 0.00 |
| ATOM | 31152 | CB   | ARG | 2084 | 109.970 | 96.796 | 71.346 | 0.00 | 0.00 |
| ATOM | 31153 | HB2  | ARG | 2084 | 109.000 | 97.285 | 71.256 | 0.00 | 0.00 |
| ATOM | 31154 | HB3  | ARG | 2084 | 110.521 | 97.240 | 72.175 | 0.00 | 0.00 |
| ATOM | 31155 | CG   | ARG | 2084 | 110.870 | 97.069 | 70.114 | 0.00 | 0.00 |
| ATOM | 31156 | HG2  | ARG | 2084 | 111.808 | 97.521 | 70.436 | 0.00 | 0.00 |
| ATOM | 31157 | HG3  | ARG | 2084 | 111.049 | 96.088 | 69.675 | 0.00 | 0.00 |
| ATOM | 31158 | CD   | ARG | 2084 | 110.337 | 97.922 | 69.034 | 0.00 | 0.00 |
| ATOM | 31159 | HD2  | ARG | 2084 | 110.006 | 98.899 | 69.388 | 0.00 | 0.00 |
| ATOM | 31160 | HD3  | ARG | 2084 | 111.128 | 98.036 | 68.293 | 0.00 | 0.00 |
| ATOM | 31161 | NE   | ARG | 2084 | 109.111 | 97.405 | 68.432 | 0.00 | 0.00 |
| ATOM | 31162 | HE   | ARG | 2084 | 109.248 | 96.510 | 67.985 | 0.00 | 0.00 |
| ATOM | 31163 | CZ   | ARG | 2084 | 107.902 | 97.847 | 68.680 | 0.00 | 0.00 |
| ATOM | 31164 | NH1  | ARG | 2084 | 107.680 | 98.949 | 69.270 | 0.00 | 0.00 |
| ATOM | 31165 | 1HH1 | ARG | 2084 | 106.812 | 99.060 | 69.774 | 0.00 | 0.00 |
| ATOM | 31166 | 2HH1 | ARG | 2084 | 108.477 | 99.505 | 69.544 | 0.00 | 0.00 |
| ATOM | 31167 | NH2  | ARG | 2084 | 106.793 | 97.155 | 68.394 | 0.00 | 0.00 |

ATOM 31168 1HH2 ARG 2084 105.967 97.451 68.893 0.00 0.00  
ATOM 31169 2HH2 ARG 2084 106.793 96.236 67.975 0.00 0.00  
ATOM 31170 C ARG 2084 109.248 95.286 73.288 0.00 0.00  
ATOM 31171 O ARG 2084 108.412 96.143 73.707 0.00 0.00  
ATOM 31172 N ARG 2085 109.839 94.335 74.099 0.00 0.00  
ATOM 31173 H ARG 2085 110.491 93.706 73.654 0.00 0.00  
ATOM 31174 CA ARG 2085 109.272 93.888 75.437 0.00 0.00  
ATOM 31175 HA ARG 2085 108.272 93.545 75.168 0.00 0.00  
ATOM 31176 CB ARG 2085 110.112 92.681 76.016 0.00 0.00  
ATOM 31177 HB2 ARG 2085 109.597 92.290 76.894 0.00 0.00  
ATOM 31178 HB3 ARG 2085 110.080 91.935 75.222 0.00 0.00  
ATOM 31179 CG ARG 2085 111.613 93.039 76.272 0.00 0.00  
ATOM 31180 HG2 ARG 2085 112.002 93.674 75.477 0.00 0.00  
ATOM 31181 HG3 ARG 2085 111.710 93.688 77.143 0.00 0.00  
ATOM 31182 CD ARG 2085 112.445 91.813 76.572 0.00 0.00  
ATOM 31183 HD2 ARG 2085 112.373 91.118 75.734 0.00 0.00  
ATOM 31184 HD3 ARG 2085 113.478 92.156 76.624 0.00 0.00  
ATOM 31185 NE ARG 2085 112.158 91.237 77.905 0.00 0.00  
ATOM 31186 HE ARG 2085 111.636 90.373 77.943 0.00 0.00  
ATOM 31187 CZ ARG 2085 112.806 91.538 79.048 0.00 0.00  
ATOM 31188 NH1 ARG 2085 113.860 92.339 79.142 0.00 0.00  
ATOM 31189 1HH1 ARG 2085 114.118 92.615 80.079 0.00 0.00  
ATOM 31190 2HH1 ARG 2085 114.030 93.016 78.413 0.00 0.00  
ATOM 31191 NH2 ARG 2085 112.499 90.848 80.086 0.00 0.00  
ATOM 31192 1HH2 ARG 2085 113.235 90.991 80.763 0.00 0.00  
ATOM 31193 2HH2 ARG 2085 111.875 90.062 79.973 0.00 0.00

|      |       |      |     |      |         |         |        |      |      |
|------|-------|------|-----|------|---------|---------|--------|------|------|
| ATOM | 31194 | C    | ARG | 2085 | 109.178 | 94.888  | 76.614 | 0.00 | 0.00 |
| ATOM | 31195 | O    | ARG | 2085 | 108.469 | 94.533  | 77.561 | 0.00 | 0.00 |
| ATOM | 31196 | N    | GLU | 2086 | 109.895 | 96.013  | 76.526 | 0.00 | 0.00 |
| ATOM | 31197 | H    | GLU | 2086 | 110.385 | 96.220  | 75.667 | 0.00 | 0.00 |
| ATOM | 31198 | CA   | GLU | 2086 | 109.731 | 97.073  | 77.506 | 0.00 | 0.00 |
| ATOM | 31199 | HA   | GLU | 2086 | 109.436 | 96.694  | 78.484 | 0.00 | 0.00 |
| ATOM | 31200 | CB   | GLU | 2086 | 111.156 | 97.700  | 77.569 | 0.00 | 0.00 |
| ATOM | 31201 | HB2  | GLU | 2086 | 111.532 | 97.856  | 76.558 | 0.00 | 0.00 |
| ATOM | 31202 | HB3  | GLU | 2086 | 111.033 | 98.715  | 77.946 | 0.00 | 0.00 |
| ATOM | 31203 | CG   | GLU | 2086 | 112.201 | 97.032  | 78.426 | 0.00 | 0.00 |
| ATOM | 31204 | HG2  | GLU | 2086 | 111.773 | 96.701  | 79.372 | 0.00 | 0.00 |
| ATOM | 31205 | HG3  | GLU | 2086 | 112.433 | 96.080  | 77.948 | 0.00 | 0.00 |
| ATOM | 31206 | CD   | GLU | 2086 | 113.539 | 97.711  | 78.673 | 0.00 | 0.00 |
| ATOM | 31207 | OE1  | GLU | 2086 | 114.497 | 97.391  | 77.918 | 0.00 | 0.00 |
| ATOM | 31208 | OE2  | GLU | 2086 | 113.638 | 98.565  | 79.643 | 0.00 | 0.00 |
| ATOM | 31209 | C    | GLU | 2086 | 108.803 | 98.238  | 77.035 | 0.00 | 0.00 |
| ATOM | 31210 | O    | GLU | 2086 | 108.252 | 98.950  | 77.878 | 0.00 | 0.00 |
| ATOM | 31211 | N    | THR | 2087 | 108.564 | 98.428  | 75.714 | 0.00 | 0.00 |
| ATOM | 31212 | H    | THR | 2087 | 109.011 | 97.842  | 75.023 | 0.00 | 0.00 |
| ATOM | 31213 | CA   | THR | 2087 | 107.680 | 99.529  | 75.139 | 0.00 | 0.00 |
| ATOM | 31214 | HA   | THR | 2087 | 107.593 | 100.354 | 75.847 | 0.00 | 0.00 |
| ATOM | 31215 | CB   | THR | 2087 | 108.242 | 100.082 | 73.850 | 0.00 | 0.00 |
| ATOM | 31216 | HB   | THR | 2087 | 107.582 | 100.878 | 73.507 | 0.00 | 0.00 |
| ATOM | 31217 | CG2  | THR | 2087 | 109.702 | 100.560 | 74.115 | 0.00 | 0.00 |
| ATOM | 31218 | 1HG2 | THR | 2087 | 110.455 | 99.778  | 74.012 | 0.00 | 0.00 |
| ATOM | 31219 | 2HG2 | THR | 2087 | 110.085 | 101.249 | 73.362 | 0.00 | 0.00 |

ATOM 31220 3HG2 THR 2087 109.794 101.026 75.096 0.00 0.00  
ATOM 31221 OG1 THR 2087 108.339 99.041 72.891 0.00 0.00  
ATOM 31222 HG1 THR 2087 107.498 99.025 72.429 0.00 0.00  
ATOM 31223 C THR 2087 106.188 99.093 75.022 0.00 0.00  
ATOM 31224 O THR 2087 105.301 99.966 74.987 0.00 0.00  
ATOM 31225 N ILE 2088 105.841 97.827 75.095 0.00 0.00  
ATOM 31226 H ILE 2088 106.510 97.079 74.987 0.00 0.00  
ATOM 31227 CA ILE 2088 104.490 97.379 75.449 0.00 0.00  
ATOM 31228 HA ILE 2088 103.843 97.701 74.633 0.00 0.00  
ATOM 31229 CB ILE 2088 104.344 95.826 75.460 0.00 0.00  
ATOM 31230 HB ILE 2088 103.325 95.668 75.814 0.00 0.00  
ATOM 31231 CG2 ILE 2088 104.527 95.137 74.115 0.00 0.00  
ATOM 31232 1HG2 ILE 2088 105.588 95.189 73.871 0.00 0.00  
ATOM 31233 2HG2 ILE 2088 104.115 94.128 74.109 0.00 0.00  
ATOM 31234 3HG2 ILE 2088 103.868 95.622 73.395 0.00 0.00  
ATOM 31235 CG1 ILE 2088 105.277 95.021 76.488 0.00 0.00  
ATOM 31236 2HG1 ILE 2088 106.317 95.104 76.171 0.00 0.00  
ATOM 31237 3HG1 ILE 2088 105.113 95.477 77.464 0.00 0.00  
ATOM 31238 CD1 ILE 2088 104.840 93.591 76.798 0.00 0.00  
ATOM 31239 1HD1 ILE 2088 104.935 92.905 75.956 0.00 0.00  
ATOM 31240 2HD1 ILE 2088 105.182 93.163 77.740 0.00 0.00  
ATOM 31241 3HD1 ILE 2088 103.754 93.668 76.853 0.00 0.00  
ATOM 31242 C ILE 2088 103.800 97.954 76.739 0.00 0.00  
ATOM 31243 O ILE 2088 102.590 97.965 76.867 0.00 0.00  
ATOM 31244 N ALA 2089 104.653 98.497 77.603 0.00 0.00  
ATOM 31245 H ALA 2089 105.633 98.295 77.461 0.00 0.00

|      |       |     |     |      |         |         |        |      |      |
|------|-------|-----|-----|------|---------|---------|--------|------|------|
| ATOM | 31246 | CA  | ALA | 2089 | 104.205 | 99.175  | 78.820 | 0.00 | 0.00 |
| ATOM | 31247 | HA  | ALA | 2089 | 103.453 | 98.603  | 79.362 | 0.00 | 0.00 |
| ATOM | 31248 | CB  | ALA | 2089 | 105.455 | 99.408  | 79.771 | 0.00 | 0.00 |
| ATOM | 31249 | HB1 | ALA | 2089 | 105.181 | 99.944  | 80.680 | 0.00 | 0.00 |
| ATOM | 31250 | HB2 | ALA | 2089 | 105.875 | 98.422  | 79.970 | 0.00 | 0.00 |
| ATOM | 31251 | HB3 | ALA | 2089 | 106.204 | 99.967  | 79.210 | 0.00 | 0.00 |
| ATOM | 31252 | C   | ALA | 2089 | 103.667 | 100.567 | 78.530 | 0.00 | 0.00 |
| ATOM | 31253 | O   | ALA | 2089 | 103.014 | 101.058 | 79.410 | 0.00 | 0.00 |
| ATOM | 31254 | N   | ALA | 2090 | 103.876 | 101.220 | 77.380 | 0.00 | 0.00 |
| ATOM | 31255 | H   | ALA | 2090 | 104.401 | 100.711 | 76.683 | 0.00 | 0.00 |
| ATOM | 31256 | CA  | ALA | 2090 | 103.358 | 102.524 | 77.066 | 0.00 | 0.00 |
| ATOM | 31257 | HA  | ALA | 2090 | 103.680 | 103.235 | 77.827 | 0.00 | 0.00 |
| ATOM | 31258 | CB  | ALA | 2090 | 104.046 | 102.935 | 75.790 | 0.00 | 0.00 |
| ATOM | 31259 | HB1 | ALA | 2090 | 103.660 | 102.364 | 74.946 | 0.00 | 0.00 |
| ATOM | 31260 | HB2 | ALA | 2090 | 103.988 | 104.003 | 75.580 | 0.00 | 0.00 |
| ATOM | 31261 | HB3 | ALA | 2090 | 105.083 | 102.599 | 75.796 | 0.00 | 0.00 |
| ATOM | 31262 | C   | ALA | 2090 | 101.809 | 102.484 | 76.892 | 0.00 | 0.00 |
| ATOM | 31263 | O   | ALA | 2090 | 101.180 | 103.407 | 77.298 | 0.00 | 0.00 |
| ATOM | 31264 | N   | GLU | 2091 | 101.283 | 101.464 | 76.236 | 0.00 | 0.00 |
| ATOM | 31265 | H   | GLU | 2091 | 101.905 | 100.811 | 75.782 | 0.00 | 0.00 |
| ATOM | 31266 | CA  | GLU | 2091 | 99.880  | 101.294 | 75.992 | 0.00 | 0.00 |
| ATOM | 31267 | HA  | GLU | 2091 | 99.525  | 102.057 | 75.298 | 0.00 | 0.00 |
| ATOM | 31268 | CB  | GLU | 2091 | 99.669  | 99.815  | 75.426 | 0.00 | 0.00 |
| ATOM | 31269 | HB2 | GLU | 2091 | 99.868  | 99.060  | 76.187 | 0.00 | 0.00 |
| ATOM | 31270 | HB3 | GLU | 2091 | 98.604  | 99.885  | 75.205 | 0.00 | 0.00 |
| ATOM | 31271 | CG  | GLU | 2091 | 100.520 | 99.667  | 74.156 | 0.00 | 0.00 |

|      |       |     |     |      |         |         |        |      |      |
|------|-------|-----|-----|------|---------|---------|--------|------|------|
| ATOM | 31272 | HG2 | GLU | 2091 | 100.610 | 100.658 | 73.712 | 0.00 | 0.00 |
| ATOM | 31273 | HG3 | GLU | 2091 | 101.544 | 99.376  | 74.391 | 0.00 | 0.00 |
| ATOM | 31274 | CD  | GLU | 2091 | 99.804  | 98.692  | 73.229 | 0.00 | 0.00 |
| ATOM | 31275 | OE1 | GLU | 2091 | 99.419  | 98.984  | 72.097 | 0.00 | 0.00 |
| ATOM | 31276 | OE2 | GLU | 2091 | 99.434  | 97.599  | 73.773 | 0.00 | 0.00 |
| ATOM | 31277 | C   | GLU | 2091 | 99.192  | 101.386 | 77.325 | 0.00 | 0.00 |
| ATOM | 31278 | O   | GLU | 2091 | 98.335  | 102.219 | 77.604 | 0.00 | 0.00 |
| ATOM | 31279 | N   | ASP | 2092 | 99.693  | 100.666 | 78.333 | 0.00 | 0.00 |
| ATOM | 31280 | H   | ASP | 2092 | 100.396 | 99.969  | 78.131 | 0.00 | 0.00 |
| ATOM | 31281 | CA  | ASP | 2092 | 99.151  | 100.517 | 79.687 | 0.00 | 0.00 |
| ATOM | 31282 | HA  | ASP | 2092 | 98.106  | 100.232 | 79.560 | 0.00 | 0.00 |
| ATOM | 31283 | CB  | ASP | 2092 | 99.861  | 99.286  | 80.264 | 0.00 | 0.00 |
| ATOM | 31284 | HB2 | ASP | 2092 | 99.419  | 98.386  | 79.835 | 0.00 | 0.00 |
| ATOM | 31285 | HB3 | ASP | 2092 | 100.867 | 99.314  | 79.846 | 0.00 | 0.00 |
| ATOM | 31286 | CG  | ASP | 2092 | 99.941  | 99.102  | 81.808 | 0.00 | 0.00 |
| ATOM | 31287 | OD1 | ASP | 2092 | 99.122  | 98.364  | 82.370 | 0.00 | 0.00 |
| ATOM | 31288 | OD2 | ASP | 2092 | 100.967 | 99.423  | 82.500 | 0.00 | 0.00 |
| ATOM | 31289 | C   | ASP | 2092 | 99.243  | 101.819 | 80.619 | 0.00 | 0.00 |
| ATOM | 31290 | O   | ASP | 2092 | 98.805  | 101.864 | 81.767 | 0.00 | 0.00 |
| ATOM | 31291 | N   | VAL | 2093 | 99.551  | 102.979 | 80.048 | 0.00 | 0.00 |
| ATOM | 31292 | H   | VAL | 2093 | 99.978  | 102.947 | 79.134 | 0.00 | 0.00 |
| ATOM | 31293 | CA  | VAL | 2093 | 99.502  | 104.310 | 80.707 | 0.00 | 0.00 |
| ATOM | 31294 | HA  | VAL | 2093 | 98.820  | 104.348 | 81.557 | 0.00 | 0.00 |
| ATOM | 31295 | CB  | VAL | 2093 | 100.920 | 104.641 | 81.288 | 0.00 | 0.00 |
| ATOM | 31296 | HB  | VAL | 2093 | 101.130 | 103.969 | 82.120 | 0.00 | 0.00 |
| ATOM | 31297 | CG1 | VAL | 2093 | 102.060 | 104.499 | 80.227 | 0.00 | 0.00 |

|            |      |     |      |         |         |        |      |      |
|------------|------|-----|------|---------|---------|--------|------|------|
| ATOM 31298 | 1HG1 | VAL | 2093 | 102.956 | 104.744 | 80.798 | 0.00 | 0.00 |
| ATOM 31299 | 2HG1 | VAL | 2093 | 102.066 | 103.500 | 79.791 | 0.00 | 0.00 |
| ATOM 31300 | 3HG1 | VAL | 2093 | 102.093 | 105.277 | 79.465 | 0.00 | 0.00 |
| ATOM 31301 | CG2  | VAL | 2093 | 101.014 | 105.999 | 81.877 | 0.00 | 0.00 |
| ATOM 31302 | 1HG2 | VAL | 2093 | 100.092 | 106.157 | 82.437 | 0.00 | 0.00 |
| ATOM 31303 | 2HG2 | VAL | 2093 | 101.827 | 106.075 | 82.598 | 0.00 | 0.00 |
| ATOM 31304 | 3HG2 | VAL | 2093 | 101.050 | 106.826 | 81.167 | 0.00 | 0.00 |
| ATOM 31305 | C    | VAL | 2093 | 99.009  | 105.389 | 79.773 | 0.00 | 0.00 |
| ATOM 31306 | O    | VAL | 2093 | 98.339  | 106.291 | 80.165 | 0.00 | 0.00 |
| ATOM 31307 | N    | LEU | 2094 | 99.220  | 105.197 | 78.452 | 0.00 | 0.00 |
| ATOM 31308 | H    | LEU | 2094 | 99.804  | 104.403 | 78.230 | 0.00 | 0.00 |
| ATOM 31309 | CA   | LEU | 2094 | 98.639  | 105.980 | 77.377 | 0.00 | 0.00 |
| ATOM 31310 | HA   | LEU | 2094 | 98.792  | 107.013 | 77.691 | 0.00 | 0.00 |
| ATOM 31311 | CB   | LEU | 2094 | 99.183  | 105.648 | 75.983 | 0.00 | 0.00 |
| ATOM 31312 | HB2  | LEU | 2094 | 99.320  | 104.567 | 75.961 | 0.00 | 0.00 |
| ATOM 31313 | HB3  | LEU | 2094 | 98.485  | 105.970 | 75.210 | 0.00 | 0.00 |
| ATOM 31314 | CG   | LEU | 2094 | 100.644 | 106.206 | 75.751 | 0.00 | 0.00 |
| ATOM 31315 | HG   | LEU | 2094 | 101.211 | 105.913 | 76.635 | 0.00 | 0.00 |
| ATOM 31316 | CD1  | LEU | 2094 | 101.350 | 105.651 | 74.458 | 0.00 | 0.00 |
| ATOM 31317 | 1HD1 | LEU | 2094 | 102.424 | 105.740 | 74.626 | 0.00 | 0.00 |
| ATOM 31318 | 2HD1 | LEU | 2094 | 100.989 | 104.625 | 74.395 | 0.00 | 0.00 |
| ATOM 31319 | 3HD1 | LEU | 2094 | 101.005 | 106.143 | 73.549 | 0.00 | 0.00 |
| ATOM 31320 | CD2  | LEU | 2094 | 100.711 | 107.705 | 75.729 | 0.00 | 0.00 |
| ATOM 31321 | 1HD2 | LEU | 2094 | 100.326 | 108.054 | 76.687 | 0.00 | 0.00 |
| ATOM 31322 | 2HD2 | LEU | 2094 | 101.752 | 108.008 | 75.616 | 0.00 | 0.00 |
| ATOM 31323 | 3HD2 | LEU | 2094 | 100.175 | 108.199 | 74.918 | 0.00 | 0.00 |



|      |       |     |     |      |        |         |        |      |      |
|------|-------|-----|-----|------|--------|---------|--------|------|------|
| ATOM | 31324 | C   | LEU | 2094 | 97.058 | 105.869 | 77.397 | 0.00 | 0.00 |
| ATOM | 31325 | O   | LEU | 2094 | 96.493 | 106.903 | 76.994 | 0.00 | 0.00 |
| ATOM | 31326 | N   | HIE | 2095 | 96.429 | 104.763 | 77.868 | 0.00 | 0.00 |
| ATOM | 31327 | H   | HIE | 2095 | 97.041 | 103.994 | 78.103 | 0.00 | 0.00 |
| ATOM | 31328 | CA  | HIE | 2095 | 94.974 | 104.682 | 78.252 | 0.00 | 0.00 |
| ATOM | 31329 | HA  | HIE | 2095 | 94.361 | 104.888 | 77.375 | 0.00 | 0.00 |
| ATOM | 31330 | CB  | HIE | 2095 | 94.756 | 103.264 | 78.772 | 0.00 | 0.00 |
| ATOM | 31331 | HB2 | HIE | 2095 | 95.685 | 102.974 | 79.263 | 0.00 | 0.00 |
| ATOM | 31332 | HB3 | HIE | 2095 | 93.992 | 103.356 | 79.544 | 0.00 | 0.00 |
| ATOM | 31333 | CG  | HIE | 2095 | 94.255 | 102.271 | 77.736 | 0.00 | 0.00 |
| ATOM | 31334 | ND1 | HIE | 2095 | 93.380 | 102.547 | 76.630 | 0.00 | 0.00 |
| ATOM | 31335 | CE1 | HIE | 2095 | 93.172 | 101.388 | 76.007 | 0.00 | 0.00 |
| ATOM | 31336 | HE1 | HIE | 2095 | 92.590 | 101.235 | 75.110 | 0.00 | 0.00 |
| ATOM | 31337 | NE2 | HIE | 2095 | 93.891 | 100.433 | 76.604 | 0.00 | 0.00 |
| ATOM | 31338 | HE2 | HIE | 2095 | 93.927 | 99.494  | 76.233 | 0.00 | 0.00 |
| ATOM | 31339 | CD2 | HIE | 2095 | 94.550 | 100.965 | 77.730 | 0.00 | 0.00 |
| ATOM | 31340 | HD2 | HIE | 2095 | 95.207 | 100.392 | 78.368 | 0.00 | 0.00 |
| ATOM | 31341 | C   | HIE | 2095 | 94.584 | 105.701 | 79.358 | 0.00 | 0.00 |
| ATOM | 31342 | O   | HIE | 2095 | 93.541 | 106.348 | 79.246 | 0.00 | 0.00 |
| ATOM | 31343 | N   | ASP | 2096 | 95.452 | 105.934 | 80.352 | 0.00 | 0.00 |
| ATOM | 31344 | H   | ASP | 2096 | 96.358 | 105.489 | 80.363 | 0.00 | 0.00 |
| ATOM | 31345 | CA  | ASP | 2096 | 95.190 | 106.887 | 81.392 | 0.00 | 0.00 |
| ATOM | 31346 | HA  | ASP | 2096 | 94.123 | 106.943 | 81.609 | 0.00 | 0.00 |
| ATOM | 31347 | CB  | ASP | 2096 | 96.047 | 106.387 | 82.620 | 0.00 | 0.00 |
| ATOM | 31348 | HB2 | ASP | 2096 | 97.098 | 106.654 | 82.722 | 0.00 | 0.00 |
| ATOM | 31349 | HB3 | ASP | 2096 | 96.030 | 105.307 | 82.475 | 0.00 | 0.00 |

|            |      |     |      |         |         |        |      |      |
|------------|------|-----|------|---------|---------|--------|------|------|
| ATOM 31350 | CG   | ASP | 2096 | 95.373  | 106.763 | 83.951 | 0.00 | 0.00 |
| ATOM 31351 | OD1  | ASP | 2096 | 94.441  | 106.111 | 84.331 | 0.00 | 0.00 |
| ATOM 31352 | OD2  | ASP | 2096 | 95.840  | 107.751 | 84.570 | 0.00 | 0.00 |
| ATOM 31353 | C    | ASP | 2096 | 95.442  | 108.326 | 81.021 | 0.00 | 0.00 |
| ATOM 31354 | O    | ASP | 2096 | 94.852  | 109.240 | 81.642 | 0.00 | 0.00 |
| ATOM 31355 | N    | LEU | 2097 | 96.325  | 108.555 | 80.101 | 0.00 | 0.00 |
| ATOM 31356 | H    | LEU | 2097 | 96.850  | 107.751 | 79.788 | 0.00 | 0.00 |
| ATOM 31357 | CA   | LEU | 2097 | 96.608  | 109.775 | 79.417 | 0.00 | 0.00 |
| ATOM 31358 | HA   | LEU | 2097 | 96.618  | 110.551 | 80.182 | 0.00 | 0.00 |
| ATOM 31359 | CB   | LEU | 2097 | 97.997  | 109.793 | 78.747 | 0.00 | 0.00 |
| ATOM 31360 | HB2  | LEU | 2097 | 98.251  | 108.734 | 78.700 | 0.00 | 0.00 |
| ATOM 31361 | HB3  | LEU | 2097 | 97.871  | 110.047 | 77.695 | 0.00 | 0.00 |
| ATOM 31362 | CG   | LEU | 2097 | 99.161  | 110.503 | 79.405 | 0.00 | 0.00 |
| ATOM 31363 | HG   | LEU | 2097 | 98.663  | 111.315 | 79.935 | 0.00 | 0.00 |
| ATOM 31364 | CD1  | LEU | 2097 | 99.662  | 109.577 | 80.520 | 0.00 | 0.00 |
| ATOM 31365 | 1HD1 | LEU | 2097 | 100.456 | 110.109 | 81.043 | 0.00 | 0.00 |
| ATOM 31366 | 2HD1 | LEU | 2097 | 98.871  | 109.479 | 81.263 | 0.00 | 0.00 |
| ATOM 31367 | 3HD1 | LEU | 2097 | 100.055 | 108.595 | 80.257 | 0.00 | 0.00 |
| ATOM 31368 | CD2  | LEU | 2097 | 100.312 | 110.879 | 78.543 | 0.00 | 0.00 |
| ATOM 31369 | 1HD2 | LEU | 2097 | 100.038 | 111.713 | 77.898 | 0.00 | 0.00 |
| ATOM 31370 | 2HD2 | LEU | 2097 | 101.064 | 111.336 | 79.187 | 0.00 | 0.00 |
| ATOM 31371 | 3HD2 | LEU | 2097 | 100.863 | 110.104 | 78.010 | 0.00 | 0.00 |
| ATOM 31372 | C    | LEU | 2097 | 95.413  | 110.176 | 78.465 | 0.00 | 0.00 |
| ATOM 31373 | O    | LEU | 2097 | 95.365  | 111.308 | 78.078 | 0.00 | 0.00 |
| ATOM 31374 | N    | GLY | 2098 | 94.409  | 109.306 | 78.264 | 0.00 | 0.00 |
| ATOM 31375 | H    | GLY | 2098 | 94.344  | 108.448 | 78.793 | 0.00 | 0.00 |

|            |     |     |      |        |         |        |      |      |
|------------|-----|-----|------|--------|---------|--------|------|------|
| ATOM 31376 | CA  | GLY | 2098 | 93.304 | 109.493 | 77.286 | 0.00 | 0.00 |
| ATOM 31377 | HA2 | GLY | 2098 | 92.585 | 108.683 | 77.410 | 0.00 | 0.00 |
| ATOM 31378 | HA3 | GLY | 2098 | 92.662 | 110.343 | 77.520 | 0.00 | 0.00 |
| ATOM 31379 | C   | GLY | 2098 | 93.906 | 109.666 | 75.849 | 0.00 | 0.00 |
| ATOM 31380 | O   | GLY | 2098 | 93.474 | 110.495 | 75.082 | 0.00 | 0.00 |
| ATOM 31381 | N   | ALA | 2099 | 94.918 | 108.870 | 75.536 | 0.00 | 0.00 |
| ATOM 31382 | H   | ALA | 2099 | 95.386 | 108.388 | 76.290 | 0.00 | 0.00 |
| ATOM 31383 | CA  | ALA | 2099 | 95.731 | 109.099 | 74.349 | 0.00 | 0.00 |
| ATOM 31384 | HA  | ALA | 2099 | 95.476 | 109.974 | 73.750 | 0.00 | 0.00 |
| ATOM 31385 | CB  | ALA | 2099 | 97.271 | 109.166 | 74.719 | 0.00 | 0.00 |
| ATOM 31386 | HB1 | ALA | 2099 | 97.530 | 108.304 | 75.335 | 0.00 | 0.00 |
| ATOM 31387 | HB2 | ALA | 2099 | 97.956 | 109.167 | 73.871 | 0.00 | 0.00 |
| ATOM 31388 | HB3 | ALA | 2099 | 97.347 | 110.073 | 75.318 | 0.00 | 0.00 |
| ATOM 31389 | C   | ALA | 2099 | 95.437 | 107.980 | 73.409 | 0.00 | 0.00 |
| ATOM 31390 | O   | ALA | 2099 | 95.341 | 108.173 | 72.192 | 0.00 | 0.00 |
| ATOM 31391 | N   | PHE | 2100 | 95.351 | 106.769 | 73.943 | 0.00 | 0.00 |
| ATOM 31392 | H   | PHE | 2100 | 95.854 | 106.671 | 74.814 | 0.00 | 0.00 |
| ATOM 31393 | CA  | PHE | 2100 | 94.677 | 105.544 | 73.424 | 0.00 | 0.00 |
| ATOM 31394 | HA  | PHE | 2100 | 94.702 | 105.605 | 72.336 | 0.00 | 0.00 |
| ATOM 31395 | CB  | PHE | 2100 | 95.509 | 104.325 | 73.756 | 0.00 | 0.00 |
| ATOM 31396 | HB2 | PHE | 2100 | 95.792 | 104.291 | 74.808 | 0.00 | 0.00 |
| ATOM 31397 | HB3 | PHE | 2100 | 94.918 | 103.423 | 73.602 | 0.00 | 0.00 |
| ATOM 31398 | CG  | PHE | 2100 | 96.873 | 104.031 | 73.080 | 0.00 | 0.00 |
| ATOM 31399 | CD1 | PHE | 2100 | 97.566 | 104.841 | 72.156 | 0.00 | 0.00 |
| ATOM 31400 | HD1 | PHE | 2100 | 97.273 | 105.858 | 71.940 | 0.00 | 0.00 |
| ATOM 31401 | CE1 | PHE | 2100 | 98.728 | 104.313 | 71.586 | 0.00 | 0.00 |

|      |       |     |     |      |        |         |        |      |      |
|------|-------|-----|-----|------|--------|---------|--------|------|------|
| ATOM | 31402 | HE1 | PHE | 2100 | 99.335 | 104.937 | 70.947 | 0.00 | 0.00 |
| ATOM | 31403 | CZ  | PHE | 2100 | 99.200 | 103.041 | 71.866 | 0.00 | 0.00 |
| ATOM | 31404 | HZ  | PHE | 2100 | 99.915 | 102.569 | 71.209 | 0.00 | 0.00 |
| ATOM | 31405 | CE2 | PHE | 2100 | 98.601 | 102.259 | 72.804 | 0.00 | 0.00 |
| ATOM | 31406 | HE2 | PHE | 2100 | 98.751 | 101.189 | 72.796 | 0.00 | 0.00 |
| ATOM | 31407 | CD2 | PHE | 2100 | 97.417 | 102.730 | 73.415 | 0.00 | 0.00 |
| ATOM | 31408 | HD2 | PHE | 2100 | 96.821 | 102.125 | 74.083 | 0.00 | 0.00 |
| ATOM | 31409 | C   | PHE | 2100 | 93.205 | 105.515 | 73.868 | 0.00 | 0.00 |
| ATOM | 31410 | O   | PHE | 2100 | 92.897 | 105.612 | 75.035 | 0.00 | 0.00 |
| ATOM | 31411 | N   | SER | 2101 | 92.342 | 105.452 | 72.838 | 0.00 | 0.00 |
| ATOM | 31412 | H   | SER | 2101 | 92.772 | 105.421 | 71.925 | 0.00 | 0.00 |
| ATOM | 31413 | CA  | SER | 2101 | 90.907 | 105.826 | 72.932 | 0.00 | 0.00 |
| ATOM | 31414 | HA  | SER | 2101 | 90.827 | 106.382 | 73.866 | 0.00 | 0.00 |
| ATOM | 31415 | CB  | SER | 2101 | 90.736 | 106.747 | 71.742 | 0.00 | 0.00 |
| ATOM | 31416 | HB2 | SER | 2101 | 90.890 | 106.212 | 70.805 | 0.00 | 0.00 |
| ATOM | 31417 | HB3 | SER | 2101 | 89.830 | 107.351 | 71.783 | 0.00 | 0.00 |
| ATOM | 31418 | OG  | SER | 2101 | 91.731 | 107.728 | 71.769 | 0.00 | 0.00 |
| ATOM | 31419 | HG  | SER | 2101 | 91.372 | 108.507 | 72.198 | 0.00 | 0.00 |
| ATOM | 31420 | C   | SER | 2101 | 89.984 | 104.673 | 72.855 | 0.00 | 0.00 |
| ATOM | 31421 | O   | SER | 2101 | 88.755 | 104.845 | 72.904 | 0.00 | 0.00 |
| ATOM | 31422 | N   | LEU | 2102 | 90.546 | 103.438 | 72.741 | 0.00 | 0.00 |
| ATOM | 31423 | H   | LEU | 2102 | 91.543 | 103.402 | 72.583 | 0.00 | 0.00 |
| ATOM | 31424 | CA  | LEU | 2102 | 89.712 | 102.278 | 72.194 | 0.00 | 0.00 |
| ATOM | 31425 | HA  | LEU | 2102 | 88.677 | 102.339 | 72.531 | 0.00 | 0.00 |
| ATOM | 31426 | CB  | LEU | 2102 | 89.766 | 102.296 | 70.678 | 0.00 | 0.00 |
| ATOM | 31427 | HB2 | LEU | 2102 | 90.833 | 102.305 | 70.456 | 0.00 | 0.00 |

|            |      |     |      |        |         |        |      |      |
|------------|------|-----|------|--------|---------|--------|------|------|
| ATOM 31428 | HB3  | LEU | 2102 | 89.380 | 101.323 | 70.374 | 0.00 | 0.00 |
| ATOM 31429 | CG   | LEU | 2102 | 89.037 | 103.465 | 69.928 | 0.00 | 0.00 |
| ATOM 31430 | HG   | LEU | 2102 | 89.237 | 104.448 | 70.353 | 0.00 | 0.00 |
| ATOM 31431 | CD1  | LEU | 2102 | 89.471 | 103.566 | 68.476 | 0.00 | 0.00 |
| ATOM 31432 | 1HD1 | LEU | 2102 | 89.158 | 104.524 | 68.062 | 0.00 | 0.00 |
| ATOM 31433 | 2HD1 | LEU | 2102 | 90.550 | 103.495 | 68.340 | 0.00 | 0.00 |
| ATOM 31434 | 3HD1 | LEU | 2102 | 89.078 | 102.669 | 67.997 | 0.00 | 0.00 |
| ATOM 31435 | CD2  | LEU | 2102 | 87.569 | 103.299 | 70.143 | 0.00 | 0.00 |
| ATOM 31436 | 1HD2 | LEU | 2102 | 87.476 | 103.446 | 71.219 | 0.00 | 0.00 |
| ATOM 31437 | 2HD2 | LEU | 2102 | 87.018 | 104.102 | 69.653 | 0.00 | 0.00 |
| ATOM 31438 | 3HD2 | LEU | 2102 | 87.116 | 102.353 | 69.846 | 0.00 | 0.00 |
| ATOM 31439 | C    | LEU | 2102 | 90.180 | 100.937 | 72.703 | 0.00 | 0.00 |
| ATOM 31440 | O    | LEU | 2102 | 91.394 | 100.678 | 72.788 | 0.00 | 0.00 |
| ATOM 31441 | N    | THR | 2103 | 89.279 | 99.998  | 73.002 | 0.00 | 0.00 |
| ATOM 31442 | H    | THR | 2103 | 88.297 | 100.221 | 72.918 | 0.00 | 0.00 |
| ATOM 31443 | CA   | THR | 2103 | 89.708 | 98.578  | 73.118 | 0.00 | 0.00 |
| ATOM 31444 | HA   | THR | 2103 | 90.574 | 98.555  | 73.779 | 0.00 | 0.00 |
| ATOM 31445 | CB   | THR | 2103 | 88.571 | 97.751  | 73.694 | 0.00 | 0.00 |
| ATOM 31446 | HB   | THR | 2103 | 88.875 | 96.747  | 73.398 | 0.00 | 0.00 |
| ATOM 31447 | CG2  | THR | 2103 | 88.503 | 97.836  | 75.220 | 0.00 | 0.00 |
| ATOM 31448 | 1HG2 | THR | 2103 | 89.464 | 97.456  | 75.565 | 0.00 | 0.00 |
| ATOM 31449 | 2HG2 | THR | 2103 | 88.487 | 98.889  | 75.500 | 0.00 | 0.00 |
| ATOM 31450 | 3HG2 | THR | 2103 | 87.631 | 97.292  | 75.584 | 0.00 | 0.00 |
| ATOM 31451 | OG1  | THR | 2103 | 87.275 | 98.017  | 73.109 | 0.00 | 0.00 |
| ATOM 31452 | HG1  | THR | 2103 | 87.015 | 97.219  | 72.644 | 0.00 | 0.00 |
| ATOM 31453 | C    | THR | 2103 | 90.089 | 97.966  | 71.697 | 0.00 | 0.00 |

|      |       |     |     |      |        |        |        |      |      |
|------|-------|-----|-----|------|--------|--------|--------|------|------|
| ATOM | 31454 | O   | THR | 2103 | 89.791 | 98.557 | 70.653 | 0.00 | 0.00 |
| ATOM | 31455 | N   | SER | 2104 | 90.813 | 96.860 | 71.637 | 0.00 | 0.00 |
| ATOM | 31456 | H   | SER | 2104 | 91.398 | 96.639 | 72.430 | 0.00 | 0.00 |
| ATOM | 31457 | CA  | SER | 2104 | 90.723 | 95.829 | 70.552 | 0.00 | 0.00 |
| ATOM | 31458 | HA  | SER | 2104 | 89.757 | 95.970 | 70.067 | 0.00 | 0.00 |
| ATOM | 31459 | CB  | SER | 2104 | 91.820 | 96.000 | 69.559 | 0.00 | 0.00 |
| ATOM | 31460 | HB2 | SER | 2104 | 92.742 | 96.178 | 70.113 | 0.00 | 0.00 |
| ATOM | 31461 | HB3 | SER | 2104 | 92.054 | 95.098 | 68.993 | 0.00 | 0.00 |
| ATOM | 31462 | OG  | SER | 2104 | 91.577 | 97.091 | 68.716 | 0.00 | 0.00 |
| ATOM | 31463 | HG  | SER | 2104 | 90.629 | 97.239 | 68.672 | 0.00 | 0.00 |
| ATOM | 31464 | C   | SER | 2104 | 90.812 | 94.475 | 71.307 | 0.00 | 0.00 |
| ATOM | 31465 | O   | SER | 2104 | 91.647 | 94.235 | 72.156 | 0.00 | 0.00 |
| ATOM | 31466 | N   | SER | 2105 | 89.989 | 93.478 | 70.860 | 0.00 | 0.00 |
| ATOM | 31467 | H   | SER | 2105 | 89.180 | 93.780 | 70.335 | 0.00 | 0.00 |
| ATOM | 31468 | CA  | SER | 2105 | 89.875 | 92.123 | 71.343 | 0.00 | 0.00 |
| ATOM | 31469 | HA  | SER | 2105 | 90.126 | 92.127 | 72.404 | 0.00 | 0.00 |
| ATOM | 31470 | CB  | SER | 2105 | 88.439 | 91.467 | 71.140 | 0.00 | 0.00 |
| ATOM | 31471 | HB2 | SER | 2105 | 88.587 | 90.427 | 71.431 | 0.00 | 0.00 |
| ATOM | 31472 | HB3 | SER | 2105 | 87.715 | 92.089 | 71.666 | 0.00 | 0.00 |
| ATOM | 31473 | OG  | SER | 2105 | 88.073 | 91.559 | 69.802 | 0.00 | 0.00 |
| ATOM | 31474 | HG  | SER | 2105 | 87.865 | 92.478 | 69.617 | 0.00 | 0.00 |
| ATOM | 31475 | C   | SER | 2105 | 90.964 | 91.232 | 70.780 | 0.00 | 0.00 |
| ATOM | 31476 | O   | SER | 2105 | 91.683 | 90.549 | 71.456 | 0.00 | 0.00 |
| ATOM | 31477 | N   | A21 | 2106 | 91.192 | 91.356 | 69.451 | 0.00 | 0.00 |
| ATOM | 31478 | H   | A21 | 2106 | 90.513 | 91.857 | 68.896 | 0.00 | 0.00 |
| ATOM | 31479 | CA  | A21 | 2106 | 92.123 | 90.570 | 68.674 | 0.00 | 0.00 |

|            |     |     |      |        |        |        |      |      |
|------------|-----|-----|------|--------|--------|--------|------|------|
| ATOM 31480 | HA  | A21 | 2106 | 91.912 | 90.726 | 67.616 | 0.00 | 0.00 |
| ATOM 31481 | CB  | A21 | 2106 | 93.532 | 91.070 | 68.987 | 0.00 | 0.00 |
| ATOM 31482 | HB2 | A21 | 2106 | 93.524 | 91.999 | 69.557 | 0.00 | 0.00 |
| ATOM 31483 | HB3 | A21 | 2106 | 94.060 | 90.469 | 69.728 | 0.00 | 0.00 |
| ATOM 31484 | CG  | A21 | 2106 | 94.329 | 91.307 | 67.650 | 0.00 | 0.00 |
| ATOM 31485 | OD1 | A21 | 2106 | 94.039 | 90.687 | 66.607 | 0.00 | 0.00 |
| ATOM 31486 | OD2 | A21 | 2106 | 95.271 | 92.132 | 67.737 | 0.00 | 0.00 |
| ATOM 31487 | C   | A21 | 2106 | 91.886 | 89.042 | 68.877 | 0.00 | 0.00 |
| ATOM 31488 | O   | A21 | 2106 | 92.741 | 88.202 | 68.781 | 0.00 | 0.00 |
| ATOM 31489 | N   | SER | 2107 | 90.652 | 88.606 | 69.097 | 0.00 | 0.00 |
| ATOM 31490 | H   | SER | 2107 | 89.869 | 89.229 | 68.966 | 0.00 | 0.00 |
| ATOM 31491 | CA  | SER | 2107 | 90.232 | 87.277 | 69.537 | 0.00 | 0.00 |
| ATOM 31492 | HA  | SER | 2107 | 90.576 | 87.118 | 70.559 | 0.00 | 0.00 |
| ATOM 31493 | CB  | SER | 2107 | 88.688 | 87.294 | 69.705 | 0.00 | 0.00 |
| ATOM 31494 | HB2 | SER | 2107 | 88.353 | 86.276 | 69.906 | 0.00 | 0.00 |
| ATOM 31495 | HB3 | SER | 2107 | 88.501 | 87.865 | 70.614 | 0.00 | 0.00 |
| ATOM 31496 | OG  | SER | 2107 | 87.933 | 87.809 | 68.597 | 0.00 | 0.00 |
| ATOM 31497 | HG  | SER | 2107 | 87.010 | 87.551 | 68.654 | 0.00 | 0.00 |
| ATOM 31498 | C   | SER | 2107 | 90.755 | 86.090 | 68.652 | 0.00 | 0.00 |
| ATOM 31499 | O   | SER | 2107 | 90.600 | 85.995 | 67.394 | 0.00 | 0.00 |
| ATOM 31500 | N   | GLN | 2108 | 91.373 | 85.136 | 69.379 | 0.00 | 0.00 |
| ATOM 31501 | H   | GLN | 2108 | 91.610 | 85.485 | 70.297 | 0.00 | 0.00 |
| ATOM 31502 | CA  | GLN | 2108 | 91.995 | 83.947 | 68.801 | 0.00 | 0.00 |
| ATOM 31503 | HA  | GLN | 2108 | 92.506 | 83.516 | 69.662 | 0.00 | 0.00 |
| ATOM 31504 | CB  | GLN | 2108 | 91.007 | 82.805 | 68.365 | 0.00 | 0.00 |
| ATOM 31505 | HB2 | GLN | 2108 | 90.242 | 83.376 | 67.839 | 0.00 | 0.00 |

|            |      |     |      |        |        |        |      |      |
|------------|------|-----|------|--------|--------|--------|------|------|
| ATOM 31506 | HB3  | GLN | 2108 | 91.509 | 82.086 | 67.717 | 0.00 | 0.00 |
| ATOM 31507 | CG   | GLN | 2108 | 90.264 | 82.124 | 69.553 | 0.00 | 0.00 |
| ATOM 31508 | HG2  | GLN | 2108 | 91.001 | 81.772 | 70.276 | 0.00 | 0.00 |
| ATOM 31509 | HG3  | GLN | 2108 | 89.688 | 82.894 | 70.067 | 0.00 | 0.00 |
| ATOM 31510 | CD   | GLN | 2108 | 89.228 | 81.040 | 69.215 | 0.00 | 0.00 |
| ATOM 31511 | OE1  | GLN | 2108 | 88.327 | 81.222 | 68.367 | 0.00 | 0.00 |
| ATOM 31512 | NE2  | GLN | 2108 | 89.246 | 79.851 | 69.834 | 0.00 | 0.00 |
| ATOM 31513 | 1HE2 | GLN | 2108 | 88.439 | 79.244 | 69.793 | 0.00 | 0.00 |
| ATOM 31514 | 2HE2 | GLN | 2108 | 89.857 | 79.621 | 70.605 | 0.00 | 0.00 |
| ATOM 31515 | C    | GLN | 2108 | 93.057 | 84.241 | 67.713 | 0.00 | 0.00 |
| ATOM 31516 | O    | GLN | 2108 | 93.508 | 83.312 | 67.047 | 0.00 | 0.00 |
| ATOM 31517 | N    | ALA | 2109 | 93.499 | 85.515 | 67.532 | 0.00 | 0.00 |
| ATOM 31518 | H    | ALA | 2109 | 93.014 | 86.223 | 68.064 | 0.00 | 0.00 |
| ATOM 31519 | CA   | ALA | 2109 | 94.390 | 86.010 | 66.511 | 0.00 | 0.00 |
| ATOM 31520 | HA   | ALA | 2109 | 94.703 | 85.229 | 65.819 | 0.00 | 0.00 |
| ATOM 31521 | CB   | ALA | 2109 | 93.572 | 86.977 | 65.643 | 0.00 | 0.00 |
| ATOM 31522 | HB1  | ALA | 2109 | 94.172 | 87.428 | 64.853 | 0.00 | 0.00 |
| ATOM 31523 | HB2  | ALA | 2109 | 92.701 | 86.484 | 65.209 | 0.00 | 0.00 |
| ATOM 31524 | HB3  | ALA | 2109 | 93.105 | 87.830 | 66.135 | 0.00 | 0.00 |
| ATOM 31525 | C    | ALA | 2109 | 95.718 | 86.593 | 67.165 | 0.00 | 0.00 |
| ATOM 31526 | O    | ALA | 2109 | 96.797 | 86.250 | 66.744 | 0.00 | 0.00 |
| ATOM 31527 | N    | MET | 2110 | 95.538 | 87.381 | 68.221 | 0.00 | 0.00 |
| ATOM 31528 | H    | MET | 2110 | 94.567 | 87.505 | 68.468 | 0.00 | 0.00 |
| ATOM 31529 | CA   | MET | 2110 | 96.639 | 87.869 | 69.062 | 0.00 | 0.00 |
| ATOM 31530 | HA   | MET | 2110 | 97.164 | 86.949 | 69.316 | 0.00 | 0.00 |
| ATOM 31531 | CB   | MET | 2110 | 97.594 | 88.752 | 68.213 | 0.00 | 0.00 |



ATOM 31532 HB2 MET 2110 97.905 88.309 67.267 0.00 0.00  
ATOM 31533 HB3 MET 2110 97.270 89.776 68.028 0.00 0.00  
ATOM 31534 CG MET 2110 98.949 88.995 68.874 0.00 0.00  
ATOM 31535 HG2 MET 2110 98.727 88.846 69.931 0.00 0.00  
ATOM 31536 HG3 MET 2110 99.627 88.177 68.630 0.00 0.00  
ATOM 31537 SD MET 2110 99.829 90.616 68.674 0.00 0.00  
ATOM 31538 CE MET 2110 100.562 90.812 70.354 0.00 0.00  
ATOM 31539 HE1 MET 2110 101.109 89.906 70.616 0.00 0.00  
ATOM 31540 HE2 MET 2110 101.124 91.744 70.416 0.00 0.00  
ATOM 31541 HE3 MET 2110 99.706 90.950 71.014 0.00 0.00  
ATOM 31542 C MET 2110 96.039 88.664 70.252 0.00 0.00  
ATOM 31543 O MET 2110 96.388 89.819 70.506 0.00 0.00  
TER 0 0  
ATOM 31544 N GLY 2111 95.062 88.098 70.881 0.00 0.00  
ATOM 31545 H GLY 2111 94.717 87.196 70.585 0.00 0.00  
ATOM 31546 CA GLY 2111 94.281 88.674 71.968 0.00 0.00  
ATOM 31547 HA2 GLY 2111 94.893 88.803 72.861 0.00 0.00  
ATOM 31548 HA3 GLY 2111 93.915 89.670 71.716 0.00 0.00  
ATOM 31549 C GLY 2111 92.995 87.860 72.331 0.00 0.00  
ATOM 31550 O GLY 2111 92.640 86.891 71.601 0.00 0.00  
ATOM 31551 N ARG 2112 92.350 88.262 73.453 0.00 0.00  
ATOM 31552 H ARG 2112 92.835 89.013 73.924 0.00 0.00  
ATOM 31553 CA ARG 2112 91.346 87.528 74.302 0.00 0.00  
ATOM 31554 HA ARG 2112 91.179 86.528 73.902 0.00 0.00  
ATOM 31555 CB ARG 2112 91.967 87.342 75.688 0.00 0.00  
ATOM 31556 HB2 ARG 2112 92.156 88.297 76.178 0.00 0.00

|      |       |      |     |      |        |        |        |      |      |
|------|-------|------|-----|------|--------|--------|--------|------|------|
| ATOM | 31557 | HB3  | ARG | 2112 | 91.338 | 86.694 | 76.299 | 0.00 | 0.00 |
| ATOM | 31558 | CG   | ARG | 2112 | 93.297 | 86.572 | 75.578 | 0.00 | 0.00 |
| ATOM | 31559 | HG2  | ARG | 2112 | 93.227 | 85.642 | 75.015 | 0.00 | 0.00 |
| ATOM | 31560 | HG3  | ARG | 2112 | 94.015 | 87.201 | 75.051 | 0.00 | 0.00 |
| ATOM | 31561 | CD   | ARG | 2112 | 93.930 | 86.293 | 76.972 | 0.00 | 0.00 |
| ATOM | 31562 | HD2  | ARG | 2112 | 94.275 | 87.266 | 77.324 | 0.00 | 0.00 |
| ATOM | 31563 | HD3  | ARG | 2112 | 93.214 | 85.957 | 77.721 | 0.00 | 0.00 |
| ATOM | 31564 | NE   | ARG | 2112 | 95.029 | 85.256 | 76.837 | 0.00 | 0.00 |
| ATOM | 31565 | HE   | ARG | 2112 | 94.761 | 84.282 | 76.820 | 0.00 | 0.00 |
| ATOM | 31566 | CZ   | ARG | 2112 | 96.316 | 85.531 | 76.758 | 0.00 | 0.00 |
| ATOM | 31567 | NH1  | ARG | 2112 | 96.725 | 86.695 | 77.154 | 0.00 | 0.00 |
| ATOM | 31568 | 1HH1 | ARG | 2112 | 97.714 | 86.892 | 77.199 | 0.00 | 0.00 |
| ATOM | 31569 | 2HH1 | ARG | 2112 | 96.033 | 87.232 | 77.658 | 0.00 | 0.00 |
| ATOM | 31570 | NH2  | ARG | 2112 | 97.168 | 84.607 | 76.323 | 0.00 | 0.00 |
| ATOM | 31571 | 1HH2 | ARG | 2112 | 98.141 | 84.847 | 76.440 | 0.00 | 0.00 |
| ATOM | 31572 | 2HH2 | ARG | 2112 | 96.803 | 83.738 | 75.960 | 0.00 | 0.00 |
| ATOM | 31573 | C    | ARG | 2112 | 89.978 | 88.184 | 74.504 | 0.00 | 0.00 |
| ATOM | 31574 | O    | ARG | 2112 | 89.830 | 89.043 | 75.326 | 0.00 | 0.00 |
| ATOM | 31575 | N    | VAL | 2113 | 89.014 | 87.625 | 73.768 | 0.00 | 0.00 |
| ATOM | 31576 | H    | VAL | 2113 | 89.254 | 86.890 | 73.117 | 0.00 | 0.00 |
| ATOM | 31577 | CA   | VAL | 2113 | 87.579 | 88.099 | 73.816 | 0.00 | 0.00 |
| ATOM | 31578 | HA   | VAL | 2113 | 87.788 | 89.096 | 73.430 | 0.00 | 0.00 |
| ATOM | 31579 | CB   | VAL | 2113 | 86.564 | 87.379 | 72.888 | 0.00 | 0.00 |
| ATOM | 31580 | HB   | VAL | 2113 | 86.960 | 87.429 | 71.874 | 0.00 | 0.00 |
| ATOM | 31581 | CG1  | VAL | 2113 | 86.431 | 85.816 | 73.249 | 0.00 | 0.00 |
| ATOM | 31582 | 1HG1 | VAL | 2113 | 86.029 | 85.297 | 72.379 | 0.00 | 0.00 |

|            |      |     |      |        |        |        |      |      |
|------------|------|-----|------|--------|--------|--------|------|------|
| ATOM 31583 | 2HG1 | VAL | 2113 | 87.429 | 85.495 | 73.548 | 0.00 | 0.00 |
| ATOM 31584 | 3HG1 | VAL | 2113 | 85.680 | 85.703 | 74.031 | 0.00 | 0.00 |
| ATOM 31585 | CG2  | VAL | 2113 | 85.144 | 88.028 | 72.877 | 0.00 | 0.00 |
| ATOM 31586 | 1HG2 | VAL | 2113 | 84.624 | 87.649 | 71.997 | 0.00 | 0.00 |
| ATOM 31587 | 2HG2 | VAL | 2113 | 84.669 | 87.822 | 73.837 | 0.00 | 0.00 |
| ATOM 31588 | 3HG2 | VAL | 2113 | 85.099 | 89.117 | 72.880 | 0.00 | 0.00 |
| ATOM 31589 | C    | VAL | 2113 | 87.033 | 88.374 | 75.171 | 0.00 | 0.00 |
| ATOM 31590 | O    | VAL | 2113 | 86.747 | 89.540 | 75.518 | 0.00 | 0.00 |
| ATOM 31591 | N    | GLY | 2114 | 86.882 | 87.336 | 76.027 | 0.00 | 0.00 |
| ATOM 31592 | H    | GLY | 2114 | 87.142 | 86.407 | 75.727 | 0.00 | 0.00 |
| ATOM 31593 | CA   | GLY | 2114 | 86.146 | 87.658 | 77.267 | 0.00 | 0.00 |
| ATOM 31594 | HA2  | GLY | 2114 | 85.121 | 87.980 | 77.080 | 0.00 | 0.00 |
| ATOM 31595 | HA3  | GLY | 2114 | 86.005 | 86.676 | 77.719 | 0.00 | 0.00 |
| ATOM 31596 | C    | GLY | 2114 | 86.810 | 88.513 | 78.386 | 0.00 | 0.00 |
| ATOM 31597 | O    | GLY | 2114 | 86.212 | 88.738 | 79.468 | 0.00 | 0.00 |
| ATOM 31598 | N    | GLU | 2115 | 88.092 | 88.841 | 78.240 | 0.00 | 0.00 |
| ATOM 31599 | H    | GLU | 2115 | 88.450 | 88.663 | 77.313 | 0.00 | 0.00 |
| ATOM 31600 | CA   | GLU | 2115 | 89.040 | 89.608 | 79.088 | 0.00 | 0.00 |
| ATOM 31601 | HA   | GLU | 2115 | 88.533 | 89.830 | 80.028 | 0.00 | 0.00 |
| ATOM 31602 | CB   | GLU | 2115 | 90.343 | 88.839 | 79.311 | 0.00 | 0.00 |
| ATOM 31603 | HB2  | GLU | 2115 | 90.653 | 88.614 | 78.290 | 0.00 | 0.00 |
| ATOM 31604 | HB3  | GLU | 2115 | 91.187 | 89.481 | 79.564 | 0.00 | 0.00 |
| ATOM 31605 | CG   | GLU | 2115 | 90.186 | 87.624 | 80.275 | 0.00 | 0.00 |
| ATOM 31606 | HG2  | GLU | 2115 | 89.890 | 87.979 | 81.263 | 0.00 | 0.00 |
| ATOM 31607 | HG3  | GLU | 2115 | 89.491 | 86.864 | 79.919 | 0.00 | 0.00 |
| ATOM 31608 | CD   | GLU | 2115 | 91.528 | 86.924 | 80.492 | 0.00 | 0.00 |

|      |       |      |     |      |        |        |        |      |      |
|------|-------|------|-----|------|--------|--------|--------|------|------|
| ATOM | 31609 | OE1  | GLU | 2115 | 91.409 | 85.825 | 81.071 | 0.00 | 0.00 |
| ATOM | 31610 | OE2  | GLU | 2115 | 92.670 | 87.372 | 80.060 | 0.00 | 0.00 |
| ATOM | 31611 | C    | GLU | 2115 | 89.316 | 91.006 | 78.518 | 0.00 | 0.00 |
| ATOM | 31612 | O    | GLU | 2115 | 89.808 | 91.877 | 79.216 | 0.00 | 0.00 |
| ATOM | 31613 | N    | VAL | 2116 | 88.840 | 91.374 | 77.228 | 0.00 | 0.00 |
| ATOM | 31614 | H    | VAL | 2116 | 88.160 | 90.832 | 76.715 | 0.00 | 0.00 |
| ATOM | 31615 | CA   | VAL | 2116 | 89.163 | 92.678 | 76.685 | 0.00 | 0.00 |
| ATOM | 31616 | HA   | VAL | 2116 | 90.245 | 92.678 | 76.560 | 0.00 | 0.00 |
| ATOM | 31617 | CB   | VAL | 2116 | 88.625 | 92.800 | 75.252 | 0.00 | 0.00 |
| ATOM | 31618 | HB   | VAL | 2116 | 89.113 | 91.984 | 74.719 | 0.00 | 0.00 |
| ATOM | 31619 | CG1  | VAL | 2116 | 87.075 | 92.742 | 75.124 | 0.00 | 0.00 |
| ATOM | 31620 | 1HG1 | VAL | 2116 | 86.508 | 91.978 | 75.656 | 0.00 | 0.00 |
| ATOM | 31621 | 2HG1 | VAL | 2116 | 86.824 | 93.704 | 75.571 | 0.00 | 0.00 |
| ATOM | 31622 | 3HG1 | VAL | 2116 | 86.717 | 92.782 | 74.095 | 0.00 | 0.00 |
| ATOM | 31623 | CG2  | VAL | 2116 | 89.115 | 94.044 | 74.506 | 0.00 | 0.00 |
| ATOM | 31624 | 1HG2 | VAL | 2116 | 88.935 | 93.812 | 73.457 | 0.00 | 0.00 |
| ATOM | 31625 | 2HG2 | VAL | 2116 | 88.683 | 94.986 | 74.843 | 0.00 | 0.00 |
| ATOM | 31626 | 3HG2 | VAL | 2116 | 90.187 | 94.069 | 74.701 | 0.00 | 0.00 |
| ATOM | 31627 | C    | VAL | 2116 | 88.868 | 93.929 | 77.507 | 0.00 | 0.00 |
| ATOM | 31628 | O    | VAL | 2116 | 89.672 | 94.837 | 77.496 | 0.00 | 0.00 |
| ATOM | 31629 | N    | ILE | 2117 | 87.784 | 93.910 | 78.248 | 0.00 | 0.00 |
| ATOM | 31630 | H    | ILE | 2117 | 87.213 | 93.079 | 78.185 | 0.00 | 0.00 |
| ATOM | 31631 | CA   | ILE | 2117 | 87.349 | 94.995 | 79.115 | 0.00 | 0.00 |
| ATOM | 31632 | HA   | ILE | 2117 | 87.864 | 95.881 | 78.742 | 0.00 | 0.00 |
| ATOM | 31633 | CB   | ILE | 2117 | 85.796 | 95.396 | 78.898 | 0.00 | 0.00 |
| ATOM | 31634 | HB   | ILE | 2117 | 85.580 | 96.182 | 79.621 | 0.00 | 0.00 |

|            |      |     |      |        |        |        |      |      |
|------------|------|-----|------|--------|--------|--------|------|------|
| ATOM 31635 | CG2  | ILE | 2117 | 85.418 | 95.785 | 77.533 | 0.00 | 0.00 |
| ATOM 31636 | 1HG2 | ILE | 2117 | 84.432 | 96.166 | 77.267 | 0.00 | 0.00 |
| ATOM 31637 | 2HG2 | ILE | 2117 | 86.104 | 96.517 | 77.106 | 0.00 | 0.00 |
| ATOM 31638 | 3HG2 | ILE | 2117 | 85.512 | 94.943 | 76.847 | 0.00 | 0.00 |
| ATOM 31639 | CG1  | ILE | 2117 | 84.816 | 94.220 | 79.278 | 0.00 | 0.00 |
| ATOM 31640 | 2HG1 | ILE | 2117 | 84.779 | 93.436 | 78.522 | 0.00 | 0.00 |
| ATOM 31641 | 3HG1 | ILE | 2117 | 85.114 | 93.687 | 80.181 | 0.00 | 0.00 |
| ATOM 31642 | CD1  | ILE | 2117 | 83.309 | 94.520 | 79.467 | 0.00 | 0.00 |
| ATOM 31643 | 1HD1 | ILE | 2117 | 83.281 | 95.599 | 79.619 | 0.00 | 0.00 |
| ATOM 31644 | 2HD1 | ILE | 2117 | 82.768 | 94.152 | 78.595 | 0.00 | 0.00 |
| ATOM 31645 | 3HD1 | ILE | 2117 | 82.903 | 94.076 | 80.376 | 0.00 | 0.00 |
| ATOM 31646 | C    | ILE | 2117 | 87.820 | 94.862 | 80.547 | 0.00 | 0.00 |
| ATOM 31647 | O    | ILE | 2117 | 88.111 | 95.846 | 81.133 | 0.00 | 0.00 |
| ATOM 31648 | N    | LEU | 2118 | 87.926 | 93.633 | 81.054 | 0.00 | 0.00 |
| ATOM 31649 | H    | LEU | 2118 | 87.847 | 92.847 | 80.425 | 0.00 | 0.00 |
| ATOM 31650 | CA   | LEU | 2118 | 88.516 | 93.257 | 82.342 | 0.00 | 0.00 |
| ATOM 31651 | HA   | LEU | 2118 | 87.886 | 93.711 | 83.108 | 0.00 | 0.00 |
| ATOM 31652 | CB   | LEU | 2118 | 88.410 | 91.708 | 82.497 | 0.00 | 0.00 |
| ATOM 31653 | HB2  | LEU | 2118 | 87.384 | 91.380 | 82.333 | 0.00 | 0.00 |
| ATOM 31654 | HB3  | LEU | 2118 | 89.106 | 91.195 | 81.834 | 0.00 | 0.00 |
| ATOM 31655 | CG   | LEU | 2118 | 88.756 | 91.398 | 84.004 | 0.00 | 0.00 |
| ATOM 31656 | HG   | LEU | 2118 | 89.731 | 91.648 | 84.420 | 0.00 | 0.00 |
| ATOM 31657 | CD1  | LEU | 2118 | 87.695 | 91.976 | 84.902 | 0.00 | 0.00 |
| ATOM 31658 | 1HD1 | LEU | 2118 | 86.739 | 91.979 | 84.378 | 0.00 | 0.00 |
| ATOM 31659 | 2HD1 | LEU | 2118 | 87.715 | 91.395 | 85.824 | 0.00 | 0.00 |
| ATOM 31660 | 3HD1 | LEU | 2118 | 87.911 | 93.010 | 85.170 | 0.00 | 0.00 |

|            |      |     |      |        |        |        |      |      |
|------------|------|-----|------|--------|--------|--------|------|------|
| ATOM 31661 | CD2  | LEU | 2118 | 88.629 | 89.891 | 84.363 | 0.00 | 0.00 |
| ATOM 31662 | 1HD2 | LEU | 2118 | 89.253 | 89.323 | 83.674 | 0.00 | 0.00 |
| ATOM 31663 | 2HD2 | LEU | 2118 | 89.092 | 89.676 | 85.327 | 0.00 | 0.00 |
| ATOM 31664 | 3HD2 | LEU | 2118 | 87.607 | 89.516 | 84.411 | 0.00 | 0.00 |
| ATOM 31665 | C    | LEU | 2118 | 89.944 | 93.704 | 82.437 | 0.00 | 0.00 |
| ATOM 31666 | O    | LEU | 2118 | 90.299 | 94.448 | 83.338 | 0.00 | 0.00 |
| ATOM 31667 | N    | ARG | 2119 | 90.803 | 93.385 | 81.422 | 0.00 | 0.00 |
| ATOM 31668 | H    | ARG | 2119 | 90.587 | 92.800 | 80.628 | 0.00 | 0.00 |
| ATOM 31669 | CA   | ARG | 2119 | 92.163 | 93.936 | 81.292 | 0.00 | 0.00 |
| ATOM 31670 | HA   | ARG | 2119 | 92.779 | 93.730 | 82.167 | 0.00 | 0.00 |
| ATOM 31671 | CB   | ARG | 2119 | 92.872 | 93.316 | 80.126 | 0.00 | 0.00 |
| ATOM 31672 | HB2  | ARG | 2119 | 92.398 | 93.415 | 79.149 | 0.00 | 0.00 |
| ATOM 31673 | HB3  | ARG | 2119 | 93.808 | 93.849 | 79.957 | 0.00 | 0.00 |
| ATOM 31674 | CG   | ARG | 2119 | 93.137 | 91.881 | 80.398 | 0.00 | 0.00 |
| ATOM 31675 | HG2  | ARG | 2119 | 93.707 | 91.813 | 81.325 | 0.00 | 0.00 |
| ATOM 31676 | HG3  | ARG | 2119 | 92.221 | 91.305 | 80.521 | 0.00 | 0.00 |
| ATOM 31677 | CD   | ARG | 2119 | 93.950 | 91.039 | 79.309 | 0.00 | 0.00 |
| ATOM 31678 | HD2  | ARG | 2119 | 93.227 | 90.953 | 78.498 | 0.00 | 0.00 |
| ATOM 31679 | HD3  | ARG | 2119 | 94.878 | 91.513 | 78.990 | 0.00 | 0.00 |
| ATOM 31680 | NE   | ARG | 2119 | 94.260 | 89.684 | 79.854 | 0.00 | 0.00 |
| ATOM 31681 | HE   | ARG | 2119 | 93.586 | 88.958 | 79.658 | 0.00 | 0.00 |
| ATOM 31682 | CZ   | ARG | 2119 | 95.116 | 89.425 | 80.838 | 0.00 | 0.00 |
| ATOM 31683 | NH1  | ARG | 2119 | 95.917 | 90.292 | 81.382 | 0.00 | 0.00 |
| ATOM 31684 | 1HH1 | ARG | 2119 | 96.211 | 90.173 | 82.341 | 0.00 | 0.00 |
| ATOM 31685 | 2HH1 | ARG | 2119 | 95.886 | 91.238 | 81.029 | 0.00 | 0.00 |
| ATOM 31686 | NH2  | ARG | 2119 | 95.159 | 88.254 | 81.338 | 0.00 | 0.00 |

ATOM 31687 1HH2 ARG 2119 95.974 87.974 81.864 0.00 0.00  
ATOM 31688 2HH2 ARG 2119 94.511 87.611 80.905 0.00 0.00  
ATOM 31689 C ARG 2119 92.257 95.474 81.339 0.00 0.00  
ATOM 31690 O ARG 2119 93.113 96.020 82.019 0.00 0.00  
ATOM 31691 N THR 2120 91.305 96.094 80.564 0.00 0.00  
ATOM 31692 H THR 2120 90.628 95.503 80.103 0.00 0.00  
ATOM 31693 CA THR 2120 91.108 97.571 80.447 0.00 0.00  
ATOM 31694 HA THR 2120 92.027 98.034 80.088 0.00 0.00  
ATOM 31695 CB THR 2120 90.004 97.919 79.417 0.00 0.00  
ATOM 31696 HB THR 2120 89.031 97.552 79.745 0.00 0.00  
ATOM 31697 CG2 THR 2120 89.852 99.407 79.299 0.00 0.00  
ATOM 31698 1HG2 THR 2120 89.458 99.801 80.236 0.00 0.00  
ATOM 31699 2HG2 THR 2120 90.807 99.843 79.007 0.00 0.00  
ATOM 31700 3HG2 THR 2120 89.046 99.590 78.588 0.00 0.00  
ATOM 31701 OG1 THR 2120 90.450 97.335 78.182 0.00 0.00  
ATOM 31702 HG1 THR 2120 89.953 96.537 77.986 0.00 0.00  
ATOM 31703 C THR 2120 90.932 98.214 81.818 0.00 0.00  
ATOM 31704 O THR 2120 91.569 99.271 82.127 0.00 0.00  
ATOM 31705 N TRP 2121 90.077 97.651 82.636 0.00 0.00  
ATOM 31706 H TRP 2121 89.607 96.828 82.288 0.00 0.00  
ATOM 31707 CA TRP 2121 89.855 98.116 84.045 0.00 0.00  
ATOM 31708 HA TRP 2121 89.765 99.195 83.924 0.00 0.00  
ATOM 31709 CB TRP 2121 88.551 97.593 84.681 0.00 0.00  
ATOM 31710 HB2 TRP 2121 88.413 96.516 84.580 0.00 0.00  
ATOM 31711 HB3 TRP 2121 88.622 97.823 85.744 0.00 0.00  
ATOM 31712 CG TRP 2121 87.322 98.287 84.136 0.00 0.00

|      |       |     |     |      |        |         |        |      |      |
|------|-------|-----|-----|------|--------|---------|--------|------|------|
| ATOM | 31713 | CD1 | TRP | 2121 | 86.420 | 97.823  | 83.167 | 0.00 | 0.00 |
| ATOM | 31714 | HD1 | TRP | 2121 | 86.377 | 96.826  | 82.754 | 0.00 | 0.00 |
| ATOM | 31715 | NE1 | TRP | 2121 | 85.520 | 98.801  | 82.893 | 0.00 | 0.00 |
| ATOM | 31716 | HE1 | TRP | 2121 | 84.868 | 98.619  | 82.143 | 0.00 | 0.00 |
| ATOM | 31717 | CE2 | TRP | 2121 | 85.836 | 99.923  | 83.537 | 0.00 | 0.00 |
| ATOM | 31718 | CZ2 | TRP | 2121 | 85.171 | 101.153 | 83.504 | 0.00 | 0.00 |
| ATOM | 31719 | HZ2 | TRP | 2121 | 84.313 | 101.235 | 82.852 | 0.00 | 0.00 |
| ATOM | 31720 | CH2 | TRP | 2121 | 85.604 | 102.224 | 84.289 | 0.00 | 0.00 |
| ATOM | 31721 | HH2 | TRP | 2121 | 85.099 | 103.170 | 84.166 | 0.00 | 0.00 |
| ATOM | 31722 | CZ3 | TRP | 2121 | 86.804 | 101.996 | 84.987 | 0.00 | 0.00 |
| ATOM | 31723 | HZ3 | TRP | 2121 | 87.178 | 102.868 | 85.504 | 0.00 | 0.00 |
| ATOM | 31724 | CE3 | TRP | 2121 | 87.478 | 100.761 | 84.973 | 0.00 | 0.00 |
| ATOM | 31725 | HE3 | TRP | 2121 | 88.360 | 100.586 | 85.572 | 0.00 | 0.00 |
| ATOM | 31726 | CD2 | TRP | 2121 | 86.993 | 99.685  | 84.274 | 0.00 | 0.00 |
| ATOM | 31727 | C   | TRP | 2121 | 90.969 | 97.755  | 85.043 | 0.00 | 0.00 |
| ATOM | 31728 | O   | TRP | 2121 | 91.404 | 98.551  | 85.864 | 0.00 | 0.00 |
| ATOM | 31729 | N   | GLN | 2122 | 91.596 | 96.561  | 84.913 | 0.00 | 0.00 |
| ATOM | 31730 | H   | GLN | 2122 | 91.315 | 95.825  | 84.281 | 0.00 | 0.00 |
| ATOM | 31731 | CA  | GLN | 2122 | 92.783 | 96.308  | 85.730 | 0.00 | 0.00 |
| ATOM | 31732 | HA  | GLN | 2122 | 92.507 | 96.260  | 86.784 | 0.00 | 0.00 |
| ATOM | 31733 | CB  | GLN | 2122 | 93.467 | 94.889  | 85.430 | 0.00 | 0.00 |
| ATOM | 31734 | HB2 | GLN | 2122 | 93.598 | 94.752  | 84.356 | 0.00 | 0.00 |
| ATOM | 31735 | HB3 | GLN | 2122 | 94.467 | 94.830  | 85.859 | 0.00 | 0.00 |
| ATOM | 31736 | CG  | GLN | 2122 | 92.541 | 93.750  | 85.938 | 0.00 | 0.00 |
| ATOM | 31737 | HG2 | GLN | 2122 | 92.605 | 93.626  | 87.019 | 0.00 | 0.00 |
| ATOM | 31738 | HG3 | GLN | 2122 | 91.497 | 93.952  | 85.699 | 0.00 | 0.00 |



|            |      |     |      |        |         |        |      |      |
|------------|------|-----|------|--------|---------|--------|------|------|
| ATOM 31739 | CD   | GLN | 2122 | 92.900 | 92.437  | 85.321 | 0.00 | 0.00 |
| ATOM 31740 | OE1  | GLN | 2122 | 92.991 | 92.361  | 84.085 | 0.00 | 0.00 |
| ATOM 31741 | NE2  | GLN | 2122 | 93.136 | 91.389  | 86.117 | 0.00 | 0.00 |
| ATOM 31742 | 1HE2 | GLN | 2122 | 93.419 | 90.499  | 85.733 | 0.00 | 0.00 |
| ATOM 31743 | 2HE2 | GLN | 2122 | 93.136 | 91.360  | 87.127 | 0.00 | 0.00 |
| ATOM 31744 | C    | GLN | 2122 | 93.903 | 97.368  | 85.387 | 0.00 | 0.00 |
| ATOM 31745 | O    | GLN | 2122 | 94.539 | 97.766  | 86.382 | 0.00 | 0.00 |
| ATOM 31746 | N    | VAL | 2123 | 94.126 | 97.815  | 84.139 | 0.00 | 0.00 |
| ATOM 31747 | H    | VAL | 2123 | 93.631 | 97.355  | 83.389 | 0.00 | 0.00 |
| ATOM 31748 | CA   | VAL | 2123 | 95.119 | 98.953  | 83.866 | 0.00 | 0.00 |
| ATOM 31749 | HA   | VAL | 2123 | 96.058 | 98.567  | 84.264 | 0.00 | 0.00 |
| ATOM 31750 | CB   | VAL | 2123 | 95.176 | 99.214  | 82.353 | 0.00 | 0.00 |
| ATOM 31751 | HB   | VAL | 2123 | 94.182 | 99.366  | 81.932 | 0.00 | 0.00 |
| ATOM 31752 | CG1  | VAL | 2123 | 95.908 | 100.465 | 81.878 | 0.00 | 0.00 |
| ATOM 31753 | 1HG1 | VAL | 2123 | 95.819 | 100.450 | 80.791 | 0.00 | 0.00 |
| ATOM 31754 | 2HG1 | VAL | 2123 | 95.575 | 101.416 | 82.292 | 0.00 | 0.00 |
| ATOM 31755 | 3HG1 | VAL | 2123 | 96.964 | 100.336 | 82.117 | 0.00 | 0.00 |
| ATOM 31756 | CG2  | VAL | 2123 | 95.774 | 98.063  | 81.588 | 0.00 | 0.00 |
| ATOM 31757 | 1HG2 | VAL | 2123 | 95.350 | 97.067  | 81.712 | 0.00 | 0.00 |
| ATOM 31758 | 2HG2 | VAL | 2123 | 95.629 | 98.203  | 80.517 | 0.00 | 0.00 |
| ATOM 31759 | 3HG2 | VAL | 2123 | 96.825 | 97.994  | 81.869 | 0.00 | 0.00 |
| ATOM 31760 | C    | VAL | 2123 | 94.655 | 100.216 | 84.654 | 0.00 | 0.00 |
| ATOM 31761 | O    | VAL | 2123 | 95.557 | 100.960 | 85.083 | 0.00 | 0.00 |
| ATOM 31762 | N    | ALA | 2124 | 93.372 | 100.469 | 84.844 | 0.00 | 0.00 |
| ATOM 31763 | H    | ALA | 2124 | 92.671 | 99.878  | 84.422 | 0.00 | 0.00 |
| ATOM 31764 | CA   | ALA | 2124 | 93.066 | 101.720 | 85.619 | 0.00 | 0.00 |

|      |       |     |     |      |        |         |        |      |      |
|------|-------|-----|-----|------|--------|---------|--------|------|------|
| ATOM | 31765 | HA  | ALA | 2124 | 93.545 | 102.589 | 85.167 | 0.00 | 0.00 |
| ATOM | 31766 | CB  | ALA | 2124 | 91.548 | 101.955 | 85.398 | 0.00 | 0.00 |
| ATOM | 31767 | HB1 | ALA | 2124 | 91.424 | 102.336 | 84.384 | 0.00 | 0.00 |
| ATOM | 31768 | HB2 | ALA | 2124 | 90.994 | 101.022 | 85.503 | 0.00 | 0.00 |
| ATOM | 31769 | HB3 | ALA | 2124 | 91.207 | 102.731 | 86.083 | 0.00 | 0.00 |
| ATOM | 31770 | C   | ALA | 2124 | 93.458 | 101.701 | 87.138 | 0.00 | 0.00 |
| ATOM | 31771 | O   | ALA | 2124 | 94.070 | 102.637 | 87.650 | 0.00 | 0.00 |
| ATOM | 31772 | N   | HIE | 2125 | 93.285 | 100.525 | 87.733 | 0.00 | 0.00 |
| ATOM | 31773 | H   | HIE | 2125 | 92.944 | 99.786  | 87.136 | 0.00 | 0.00 |
| ATOM | 31774 | CA  | HIE | 2125 | 93.650 | 100.285 | 89.065 | 0.00 | 0.00 |
| ATOM | 31775 | HA  | HIE | 2125 | 93.184 | 101.108 | 89.606 | 0.00 | 0.00 |
| ATOM | 31776 | CB  | HIE | 2125 | 93.143 | 98.864  | 89.501 | 0.00 | 0.00 |
| ATOM | 31777 | HB2 | HIE | 2125 | 92.075 | 98.812  | 89.713 | 0.00 | 0.00 |
| ATOM | 31778 | HB3 | HIE | 2125 | 93.349 | 98.151  | 88.703 | 0.00 | 0.00 |
| ATOM | 31779 | CG  | HIE | 2125 | 93.844 | 98.256  | 90.696 | 0.00 | 0.00 |
| ATOM | 31780 | ND1 | HIE | 2125 | 93.348 | 98.266  | 92.017 | 0.00 | 0.00 |
| ATOM | 31781 | CE1 | HIE | 2125 | 94.184 | 97.513  | 92.691 | 0.00 | 0.00 |
| ATOM | 31782 | HE1 | HIE | 2125 | 93.947 | 97.273  | 93.717 | 0.00 | 0.00 |
| ATOM | 31783 | NE2 | HIE | 2125 | 95.241 | 97.093  | 91.976 | 0.00 | 0.00 |
| ATOM | 31784 | HE2 | HIE | 2125 | 95.927 | 96.423  | 92.293 | 0.00 | 0.00 |
| ATOM | 31785 | CD2 | HIE | 2125 | 95.017 | 97.584  | 90.702 | 0.00 | 0.00 |
| ATOM | 31786 | HD2 | HIE | 2125 | 95.652 | 97.408  | 89.846 | 0.00 | 0.00 |
| ATOM | 31787 | C   | HIE | 2125 | 95.175 | 100.305 | 89.282 | 0.00 | 0.00 |
| ATOM | 31788 | O   | HIE | 2125 | 95.639 | 100.863 | 90.234 | 0.00 | 0.00 |
| ATOM | 31789 | N   | ARG | 2126 | 95.932 | 99.894  | 88.298 | 0.00 | 0.00 |
| ATOM | 31790 | H   | ARG | 2126 | 95.457 | 99.525  | 87.486 | 0.00 | 0.00 |

|      |       |      |     |      |         |         |        |      |      |
|------|-------|------|-----|------|---------|---------|--------|------|------|
| ATOM | 31791 | CA   | ARG | 2126 | 97.441  | 99.866  | 88.374 | 0.00 | 0.00 |
| ATOM | 31792 | HA   | ARG | 2126 | 97.650  | 99.363  | 89.317 | 0.00 | 0.00 |
| ATOM | 31793 | CB   | ARG | 2126 | 97.931  | 98.902  | 87.305 | 0.00 | 0.00 |
| ATOM | 31794 | HB2  | ARG | 2126 | 97.455  | 97.922  | 87.356 | 0.00 | 0.00 |
| ATOM | 31795 | HB3  | ARG | 2126 | 97.839  | 99.358  | 86.319 | 0.00 | 0.00 |
| ATOM | 31796 | CG   | ARG | 2126 | 99.420  | 98.592  | 87.569 | 0.00 | 0.00 |
| ATOM | 31797 | HG2  | ARG | 2126 | 100.051 | 99.466  | 87.731 | 0.00 | 0.00 |
| ATOM | 31798 | HG3  | ARG | 2126 | 99.461  | 97.918  | 88.425 | 0.00 | 0.00 |
| ATOM | 31799 | CD   | ARG | 2126 | 100.092 | 97.776  | 86.425 | 0.00 | 0.00 |
| ATOM | 31800 | HD2  | ARG | 2126 | 100.680 | 97.020  | 86.946 | 0.00 | 0.00 |
| ATOM | 31801 | HD3  | ARG | 2126 | 99.248  | 97.377  | 85.862 | 0.00 | 0.00 |
| ATOM | 31802 | NE   | ARG | 2126 | 100.884 | 98.639  | 85.494 | 0.00 | 0.00 |
| ATOM | 31803 | HE   | ARG | 2126 | 100.489 | 98.945  | 84.616 | 0.00 | 0.00 |
| ATOM | 31804 | CZ   | ARG | 2126 | 102.109 | 98.988  | 85.711 | 0.00 | 0.00 |
| ATOM | 31805 | NH1  | ARG | 2126 | 102.700 | 98.787  | 86.866 | 0.00 | 0.00 |
| ATOM | 31806 | 1HH1 | ARG | 2126 | 103.703 | 98.859  | 86.959 | 0.00 | 0.00 |
| ATOM | 31807 | 2HH1 | ARG | 2126 | 102.199 | 98.422  | 87.664 | 0.00 | 0.00 |
| ATOM | 31808 | NH2  | ARG | 2126 | 102.749 | 99.586  | 84.744 | 0.00 | 0.00 |
| ATOM | 31809 | 1HH2 | ARG | 2126 | 103.688 | 99.889  | 84.962 | 0.00 | 0.00 |
| ATOM | 31810 | 2HH2 | ARG | 2126 | 102.258 | 99.655  | 83.865 | 0.00 | 0.00 |
| ATOM | 31811 | C    | ARG | 2126 | 97.916  | 101.309 | 88.190 | 0.00 | 0.00 |
| ATOM | 31812 | O    | ARG | 2126 | 98.837  | 101.745 | 88.834 | 0.00 | 0.00 |
| ATOM | 31813 | N    | MET | 2127 | 97.189  | 102.126 | 87.472 | 0.00 | 0.00 |
| ATOM | 31814 | H    | MET | 2127 | 96.656  | 101.655 | 86.756 | 0.00 | 0.00 |
| ATOM | 31815 | CA   | MET | 2127 | 97.452  | 103.533 | 87.459 | 0.00 | 0.00 |
| ATOM | 31816 | HA   | MET | 2127 | 98.503  | 103.706 | 87.228 | 0.00 | 0.00 |

|            |              |         |         |        |      |      |
|------------|--------------|---------|---------|--------|------|------|
| ATOM 31817 | CB MET 2127  | 96.708  | 104.138 | 86.209 | 0.00 | 0.00 |
| ATOM 31818 | HB2 MET 2127 | 95.691  | 103.764 | 86.098 | 0.00 | 0.00 |
| ATOM 31819 | HB3 MET 2127 | 96.673  | 105.228 | 86.216 | 0.00 | 0.00 |
| ATOM 31820 | CG MET 2127  | 97.565  | 103.893 | 84.879 | 0.00 | 0.00 |
| ATOM 31821 | HG2 MET 2127 | 97.834  | 102.841 | 84.786 | 0.00 | 0.00 |
| ATOM 31822 | HG3 MET 2127 | 97.006  | 103.923 | 83.944 | 0.00 | 0.00 |
| ATOM 31823 | SD MET 2127  | 98.847  | 105.113 | 84.798 | 0.00 | 0.00 |
| ATOM 31824 | CE MET 2127  | 100.411 | 104.240 | 85.161 | 0.00 | 0.00 |
| ATOM 31825 | HE1 MET 2127 | 101.173 | 105.020 | 85.180 | 0.00 | 0.00 |
| ATOM 31826 | HE2 MET 2127 | 100.312 | 103.785 | 86.146 | 0.00 | 0.00 |
| ATOM 31827 | HE3 MET 2127 | 100.655 | 103.529 | 84.372 | 0.00 | 0.00 |
| ATOM 31828 | C MET 2127   | 97.131  | 104.313 | 88.747 | 0.00 | 0.00 |
| ATOM 31829 | O MET 2127   | 98.057  | 104.960 | 89.255 | 0.00 | 0.00 |
| ATOM 31830 | N LYS 2128   | 96.030  | 103.996 | 89.426 | 0.00 | 0.00 |
| ATOM 31831 | H LYS 2128   | 95.443  | 103.307 | 88.978 | 0.00 | 0.00 |
| ATOM 31832 | CA LYS 2128  | 95.827  | 104.477 | 90.808 | 0.00 | 0.00 |
| ATOM 31833 | HA LYS 2128  | 95.958  | 105.559 | 90.803 | 0.00 | 0.00 |
| ATOM 31834 | CB LYS 2128  | 94.395  | 104.196 | 91.244 | 0.00 | 0.00 |
| ATOM 31835 | HB2 LYS 2128 | 93.749  | 104.374 | 90.384 | 0.00 | 0.00 |
| ATOM 31836 | HB3 LYS 2128 | 94.340  | 103.182 | 91.638 | 0.00 | 0.00 |
| ATOM 31837 | CG LYS 2128  | 93.970  | 105.162 | 92.386 | 0.00 | 0.00 |
| ATOM 31838 | HG2 LYS 2128 | 94.834  | 105.381 | 93.014 | 0.00 | 0.00 |
| ATOM 31839 | HG3 LYS 2128 | 93.575  | 106.089 | 91.971 | 0.00 | 0.00 |
| ATOM 31840 | CD LYS 2128  | 92.850  | 104.625 | 93.328 | 0.00 | 0.00 |
| ATOM 31841 | HD2 LYS 2128 | 92.025  | 104.483 | 92.630 | 0.00 | 0.00 |
| ATOM 31842 | HD3 LYS 2128 | 93.075  | 103.652 | 93.764 | 0.00 | 0.00 |

|            |      |     |      |         |         |        |      |      |
|------------|------|-----|------|---------|---------|--------|------|------|
| ATOM 31843 | CE   | LYS | 2128 | 92.550  | 105.593 | 94.518 | 0.00 | 0.00 |
| ATOM 31844 | HE2  | LYS | 2128 | 93.300  | 105.433 | 95.293 | 0.00 | 0.00 |
| ATOM 31845 | HE3  | LYS | 2128 | 92.484  | 106.643 | 94.232 | 0.00 | 0.00 |
| ATOM 31846 | NZ   | LYS | 2128 | 91.191  | 105.255 | 94.956 | 0.00 | 0.00 |
| ATOM 31847 | HZ1  | LYS | 2128 | 90.467  | 105.532 | 94.309 | 0.00 | 0.00 |
| ATOM 31848 | HZ2  | LYS | 2128 | 91.044  | 104.269 | 95.117 | 0.00 | 0.00 |
| ATOM 31849 | HZ3  | LYS | 2128 | 90.951  | 105.671 | 95.844 | 0.00 | 0.00 |
| ATOM 31850 | C    | LYS | 2128 | 96.847  | 103.942 | 91.792 | 0.00 | 0.00 |
| ATOM 31851 | O    | LYS | 2128 | 97.058  | 104.678 | 92.761 | 0.00 | 0.00 |
| ATOM 31852 | N    | VAL | 2129 | 97.300  | 102.704 | 91.587 | 0.00 | 0.00 |
| ATOM 31853 | H    | VAL | 2129 | 96.822  | 102.078 | 90.956 | 0.00 | 0.00 |
| ATOM 31854 | CA   | VAL | 2129 | 98.437  | 102.133 | 92.444 | 0.00 | 0.00 |
| ATOM 31855 | HA   | VAL | 2129 | 98.216  | 102.295 | 93.498 | 0.00 | 0.00 |
| ATOM 31856 | CB   | VAL | 2129 | 98.488  | 100.591 | 92.281 | 0.00 | 0.00 |
| ATOM 31857 | HB   | VAL | 2129 | 98.555  | 100.314 | 91.229 | 0.00 | 0.00 |
| ATOM 31858 | CG1  | VAL | 2129 | 99.764  | 100.021 | 92.962 | 0.00 | 0.00 |
| ATOM 31859 | 1HG1 | VAL | 2129 | 99.784  | 100.306 | 94.014 | 0.00 | 0.00 |
| ATOM 31860 | 2HG1 | VAL | 2129 | 99.666  | 98.945  | 92.818 | 0.00 | 0.00 |
| ATOM 31861 | 3HG1 | VAL | 2129 | 100.707 | 100.310 | 92.496 | 0.00 | 0.00 |
| ATOM 31862 | CG2  | VAL | 2129 | 97.318  | 99.947  | 93.010 | 0.00 | 0.00 |
| ATOM 31863 | 1HG2 | VAL | 2129 | 96.428  | 100.538 | 92.796 | 0.00 | 0.00 |
| ATOM 31864 | 2HG2 | VAL | 2129 | 97.211  | 99.004  | 92.474 | 0.00 | 0.00 |
| ATOM 31865 | 3HG2 | VAL | 2129 | 97.429  | 99.789  | 94.083 | 0.00 | 0.00 |
| ATOM 31866 | C    | VAL | 2129 | 99.771  | 102.831 | 92.135 | 0.00 | 0.00 |
| ATOM 31867 | O    | VAL | 2129 | 100.510 | 103.088 | 93.087 | 0.00 | 0.00 |
| ATOM 31868 | N    | GLN | 2130 | 100.118 | 103.167 | 90.872 | 0.00 | 0.00 |

|            |      |          |         |         |        |      |      |
|------------|------|----------|---------|---------|--------|------|------|
| ATOM 31869 | H    | GLN 2130 | 99.443  | 102.926 | 90.161 | 0.00 | 0.00 |
| ATOM 31870 | CA   | GLN 2130 | 101.424 | 103.584 | 90.435 | 0.00 | 0.00 |
| ATOM 31871 | HA   | GLN 2130 | 102.152 | 103.356 | 91.214 | 0.00 | 0.00 |
| ATOM 31872 | CB   | GLN 2130 | 101.796 | 102.939 | 89.071 | 0.00 | 0.00 |
| ATOM 31873 | HB2  | GLN 2130 | 101.024 | 103.203 | 88.348 | 0.00 | 0.00 |
| ATOM 31874 | HB3  | GLN 2130 | 102.721 | 103.355 | 88.673 | 0.00 | 0.00 |
| ATOM 31875 | CG   | GLN 2130 | 101.910 | 101.385 | 89.130 | 0.00 | 0.00 |
| ATOM 31876 | HG2  | GLN 2130 | 101.004 | 101.010 | 89.606 | 0.00 | 0.00 |
| ATOM 31877 | HG3  | GLN 2130 | 102.036 | 101.030 | 88.107 | 0.00 | 0.00 |
| ATOM 31878 | CD   | GLN 2130 | 103.277 | 101.028 | 89.807 | 0.00 | 0.00 |
| ATOM 31879 | OE1  | GLN 2130 | 103.239 | 100.597 | 90.940 | 0.00 | 0.00 |
| ATOM 31880 | NE2  | GLN 2130 | 104.396 | 101.510 | 89.363 | 0.00 | 0.00 |
| ATOM 31881 | 1HE2 | GLN 2130 | 105.259 | 101.375 | 89.870 | 0.00 | 0.00 |
| ATOM 31882 | 2HE2 | GLN 2130 | 104.391 | 102.016 | 88.489 | 0.00 | 0.00 |
| ATOM 31883 | C    | GLN 2130 | 101.602 | 105.108 | 90.311 | 0.00 | 0.00 |
| ATOM 31884 | O    | GLN 2130 | 102.786 | 105.536 | 90.447 | 0.00 | 0.00 |
| ATOM 31885 | N    | ARG 2131 | 100.587 | 105.928 | 89.975 | 0.00 | 0.00 |
| ATOM 31886 | H    | ARG 2131 | 99.675  | 105.584 | 89.710 | 0.00 | 0.00 |
| ATOM 31887 | CA   | ARG 2131 | 100.723 | 107.420 | 89.981 | 0.00 | 0.00 |
| ATOM 31888 | HA   | ARG 2131 | 101.633 | 107.662 | 90.530 | 0.00 | 0.00 |
| ATOM 31889 | CB   | ARG 2131 | 101.129 | 107.940 | 88.521 | 0.00 | 0.00 |
| ATOM 31890 | HB2  | ARG 2131 | 101.358 | 108.997 | 88.662 | 0.00 | 0.00 |
| ATOM 31891 | HB3  | ARG 2131 | 102.066 | 107.528 | 88.147 | 0.00 | 0.00 |
| ATOM 31892 | CG   | ARG 2131 | 100.103 | 107.722 | 87.396 | 0.00 | 0.00 |
| ATOM 31893 | HG2  | ARG 2131 | 100.005 | 106.699 | 87.031 | 0.00 | 0.00 |
| ATOM 31894 | HG3  | ARG 2131 | 99.113  | 108.009 | 87.751 | 0.00 | 0.00 |

|      |       |      |     |      |         |         |        |      |      |
|------|-------|------|-----|------|---------|---------|--------|------|------|
| ATOM | 31895 | CD   | ARG | 2131 | 100.388 | 108.619 | 86.208 | 0.00 | 0.00 |
| ATOM | 31896 | HD2  | ARG | 2131 | 100.497 | 109.679 | 86.435 | 0.00 | 0.00 |
| ATOM | 31897 | HD3  | ARG | 2131 | 101.329 | 108.357 | 85.724 | 0.00 | 0.00 |
| ATOM | 31898 | NE   | ARG | 2131 | 99.275  | 108.471 | 85.216 | 0.00 | 0.00 |
| ATOM | 31899 | HE   | ARG | 2131 | 98.671  | 107.675 | 85.365 | 0.00 | 0.00 |
| ATOM | 31900 | CZ   | ARG | 2131 | 98.941  | 109.380 | 84.305 | 0.00 | 0.00 |
| ATOM | 31901 | NH1  | ARG | 2131 | 99.713  | 110.406 | 84.089 | 0.00 | 0.00 |
| ATOM | 31902 | 1HH1 | ARG | 2131 | 99.354  | 111.210 | 83.594 | 0.00 | 0.00 |
| ATOM | 31903 | 2HH1 | ARG | 2131 | 100.629 | 110.520 | 84.499 | 0.00 | 0.00 |
| ATOM | 31904 | NH2  | ARG | 2131 | 97.868  | 109.300 | 83.612 | 0.00 | 0.00 |
| ATOM | 31905 | 1HH2 | ARG | 2131 | 97.584  | 110.044 | 82.990 | 0.00 | 0.00 |
| ATOM | 31906 | 2HH2 | ARG | 2131 | 97.109  | 108.785 | 84.036 | 0.00 | 0.00 |
| ATOM | 31907 | C    | ARG | 2131 | 99.561  | 108.080 | 90.731 | 0.00 | 0.00 |
| ATOM | 31908 | O    | ARG | 2131 | 99.438  | 109.285 | 90.572 | 0.00 | 0.00 |
| ATOM | 31909 | N    | GLY | 2132 | 98.797  | 107.289 | 91.533 | 0.00 | 0.00 |
| ATOM | 31910 | H    | GLY | 2132 | 98.839  | 106.280 | 91.501 | 0.00 | 0.00 |
| ATOM | 31911 | CA   | GLY | 2132 | 97.887  | 107.830 | 92.526 | 0.00 | 0.00 |
| ATOM | 31912 | HA2  | GLY | 2132 | 97.484  | 107.078 | 93.204 | 0.00 | 0.00 |
| ATOM | 31913 | HA3  | GLY | 2132 | 98.473  | 108.582 | 93.056 | 0.00 | 0.00 |
| ATOM | 31914 | C    | GLY | 2132 | 96.633  | 108.487 | 91.930 | 0.00 | 0.00 |
| ATOM | 31915 | O    | GLY | 2132 | 96.213  | 107.964 | 90.885 | 0.00 | 0.00 |
| ATOM | 31916 | N    | ALA | 2133 | 95.965  | 109.394 | 92.567 | 0.00 | 0.00 |
| ATOM | 31917 | H    | ALA | 2133 | 96.283  | 109.782 | 93.443 | 0.00 | 0.00 |
| ATOM | 31918 | CA   | ALA | 2133 | 94.736  | 109.973 | 92.031 | 0.00 | 0.00 |
| ATOM | 31919 | HA   | ALA | 2133 | 94.060  | 109.200 | 91.666 | 0.00 | 0.00 |
| ATOM | 31920 | CB   | ALA | 2133 | 94.005  | 110.809 | 93.067 | 0.00 | 0.00 |

|      |       |      |     |      |        |         |        |      |      |
|------|-------|------|-----|------|--------|---------|--------|------|------|
| ATOM | 31921 | HB1  | ALA | 2133 | 93.615 | 110.112 | 93.810 | 0.00 | 0.00 |
| ATOM | 31922 | HB2  | ALA | 2133 | 94.616 | 111.630 | 93.440 | 0.00 | 0.00 |
| ATOM | 31923 | HB3  | ALA | 2133 | 93.140 | 111.248 | 92.571 | 0.00 | 0.00 |
| ATOM | 31924 | C    | ALA | 2133 | 95.039 | 110.730 | 90.805 | 0.00 | 0.00 |
| ATOM | 31925 | O    | ALA | 2133 | 96.004 | 111.355 | 90.681 | 0.00 | 0.00 |
| ATOM | 31926 | N    | LEU | 2134 | 94.132 | 110.788 | 89.801 | 0.00 | 0.00 |
| ATOM | 31927 | H    | LEU | 2134 | 93.243 | 110.324 | 89.922 | 0.00 | 0.00 |
| ATOM | 31928 | CA   | LEU | 2134 | 94.390 | 111.241 | 88.480 | 0.00 | 0.00 |
| ATOM | 31929 | HA   | LEU | 2134 | 95.349 | 110.825 | 88.170 | 0.00 | 0.00 |
| ATOM | 31930 | CB   | LEU | 2134 | 93.340 | 110.608 | 87.499 | 0.00 | 0.00 |
| ATOM | 31931 | HB2  | LEU | 2134 | 93.369 | 109.521 | 87.419 | 0.00 | 0.00 |
| ATOM | 31932 | HB3  | LEU | 2134 | 92.311 | 110.693 | 87.848 | 0.00 | 0.00 |
| ATOM | 31933 | CG   | LEU | 2134 | 93.386 | 111.260 | 86.071 | 0.00 | 0.00 |
| ATOM | 31934 | HG   | LEU | 2134 | 93.029 | 112.276 | 86.244 | 0.00 | 0.00 |
| ATOM | 31935 | CD1  | LEU | 2134 | 94.852 | 111.326 | 85.504 | 0.00 | 0.00 |
| ATOM | 31936 | 1HD1 | LEU | 2134 | 95.503 | 110.490 | 85.760 | 0.00 | 0.00 |
| ATOM | 31937 | 2HD1 | LEU | 2134 | 94.839 | 111.311 | 84.414 | 0.00 | 0.00 |
| ATOM | 31938 | 3HD1 | LEU | 2134 | 95.305 | 112.244 | 85.878 | 0.00 | 0.00 |
| ATOM | 31939 | CD2  | LEU | 2134 | 92.511 | 110.432 | 85.161 | 0.00 | 0.00 |
| ATOM | 31940 | 1HD2 | LEU | 2134 | 91.568 | 110.251 | 85.679 | 0.00 | 0.00 |
| ATOM | 31941 | 2HD2 | LEU | 2134 | 92.334 | 110.839 | 84.166 | 0.00 | 0.00 |
| ATOM | 31942 | 3HD2 | LEU | 2134 | 93.059 | 109.504 | 84.999 | 0.00 | 0.00 |
| ATOM | 31943 | C    | LEU | 2134 | 94.444 | 112.787 | 88.555 | 0.00 | 0.00 |
| ATOM | 31944 | O    | LEU | 2134 | 93.452 | 113.482 | 88.646 | 0.00 | 0.00 |
| ATOM | 31945 | N    | ALA | 2135 | 95.582 | 113.360 | 88.609 | 0.00 | 0.00 |
| ATOM | 31946 | H    | ALA | 2135 | 96.403 | 112.776 | 88.679 | 0.00 | 0.00 |



|      |       |     |     |      |        |         |        |      |      |
|------|-------|-----|-----|------|--------|---------|--------|------|------|
| ATOM | 31947 | CA  | ALA | 2135 | 95.834 | 114.671 | 89.084 | 0.00 | 0.00 |
| ATOM | 31948 | HA  | ALA | 2135 | 95.173 | 114.797 | 89.941 | 0.00 | 0.00 |
| ATOM | 31949 | CB  | ALA | 2135 | 97.325 | 114.848 | 89.344 | 0.00 | 0.00 |
| ATOM | 31950 | HB1 | ALA | 2135 | 97.723 | 114.630 | 88.353 | 0.00 | 0.00 |
| ATOM | 31951 | HB2 | ALA | 2135 | 97.488 | 115.875 | 89.672 | 0.00 | 0.00 |
| ATOM | 31952 | HB3 | ALA | 2135 | 97.696 | 114.021 | 89.950 | 0.00 | 0.00 |
| ATOM | 31953 | C   | ALA | 2135 | 95.324 | 115.834 | 88.124 | 0.00 | 0.00 |
| ATOM | 31954 | O   | ALA | 2135 | 95.402 | 117.006 | 88.566 | 0.00 | 0.00 |
| ATOM | 31955 | N   | GLU | 2136 | 94.659 | 115.561 | 86.997 | 0.00 | 0.00 |
| ATOM | 31956 | H   | GLU | 2136 | 94.744 | 114.601 | 86.694 | 0.00 | 0.00 |
| ATOM | 31957 | CA  | GLU | 2136 | 93.801 | 116.435 | 86.216 | 0.00 | 0.00 |
| ATOM | 31958 | HA  | GLU | 2136 | 94.281 | 117.362 | 85.905 | 0.00 | 0.00 |
| ATOM | 31959 | CB  | GLU | 2136 | 93.365 | 115.654 | 84.975 | 0.00 | 0.00 |
| ATOM | 31960 | HB2 | GLU | 2136 | 92.713 | 114.834 | 85.278 | 0.00 | 0.00 |
| ATOM | 31961 | HB3 | GLU | 2136 | 92.784 | 116.307 | 84.323 | 0.00 | 0.00 |
| ATOM | 31962 | CG  | GLU | 2136 | 94.480 | 115.048 | 84.053 | 0.00 | 0.00 |
| ATOM | 31963 | HG2 | GLU | 2136 | 95.090 | 115.874 | 83.688 | 0.00 | 0.00 |
| ATOM | 31964 | HG3 | GLU | 2136 | 95.036 | 114.359 | 84.688 | 0.00 | 0.00 |
| ATOM | 31965 | CD  | GLU | 2136 | 94.016 | 114.254 | 82.798 | 0.00 | 0.00 |
| ATOM | 31966 | OE1 | GLU | 2136 | 92.851 | 114.415 | 82.326 | 0.00 | 0.00 |
| ATOM | 31967 | OE2 | GLU | 2136 | 94.754 | 113.344 | 82.366 | 0.00 | 0.00 |
| ATOM | 31968 | C   | GLU | 2136 | 92.622 | 117.053 | 86.907 | 0.00 | 0.00 |
| ATOM | 31969 | O   | GLU | 2136 | 92.027 | 118.011 | 86.419 | 0.00 | 0.00 |
| ATOM | 31970 | N   | GLU | 2137 | 92.163 | 116.348 | 87.978 | 0.00 | 0.00 |
| ATOM | 31971 | H   | GLU | 2137 | 92.777 | 115.627 | 88.328 | 0.00 | 0.00 |
| ATOM | 31972 | CA  | GLU | 2137 | 90.912 | 116.582 | 88.710 | 0.00 | 0.00 |

|      |       |      |     |      |        |         |        |      |      |
|------|-------|------|-----|------|--------|---------|--------|------|------|
| ATOM | 31973 | HA   | GLU | 2137 | 90.606 | 117.616 | 88.549 | 0.00 | 0.00 |
| ATOM | 31974 | CB   | GLU | 2137 | 89.832 | 115.708 | 88.250 | 0.00 | 0.00 |
| ATOM | 31975 | HB2  | GLU | 2137 | 89.593 | 115.979 | 87.222 | 0.00 | 0.00 |
| ATOM | 31976 | HB3  | GLU | 2137 | 90.092 | 114.653 | 88.339 | 0.00 | 0.00 |
| ATOM | 31977 | CG   | GLU | 2137 | 88.620 | 115.825 | 89.195 | 0.00 | 0.00 |
| ATOM | 31978 | HG2  | GLU | 2137 | 87.955 | 115.056 | 88.802 | 0.00 | 0.00 |
| ATOM | 31979 | HG3  | GLU | 2137 | 88.922 | 115.441 | 90.170 | 0.00 | 0.00 |
| ATOM | 31980 | CD   | GLU | 2137 | 87.997 | 117.214 | 89.249 | 0.00 | 0.00 |
| ATOM | 31981 | OE1  | GLU | 2137 | 87.614 | 117.861 | 88.230 | 0.00 | 0.00 |
| ATOM | 31982 | OE2  | GLU | 2137 | 87.903 | 117.747 | 90.395 | 0.00 | 0.00 |
| ATOM | 31983 | C    | GLU | 2137 | 91.214 | 116.404 | 90.188 | 0.00 | 0.00 |
| ATOM | 31984 | O    | GLU | 2137 | 91.941 | 115.511 | 90.571 | 0.00 | 0.00 |
| ATOM | 31985 | N    | THR | 2138 | 90.727 | 117.324 | 91.080 | 0.00 | 0.00 |
| ATOM | 31986 | H    | THR | 2138 | 90.081 | 118.018 | 90.731 | 0.00 | 0.00 |
| ATOM | 31987 | CA   | THR | 2138 | 91.179 | 117.349 | 92.507 | 0.00 | 0.00 |
| ATOM | 31988 | HA   | THR | 2138 | 92.137 | 116.847 | 92.643 | 0.00 | 0.00 |
| ATOM | 31989 | CB   | THR | 2138 | 91.358 | 118.757 | 93.073 | 0.00 | 0.00 |
| ATOM | 31990 | HB   | THR | 2138 | 91.447 | 118.843 | 94.156 | 0.00 | 0.00 |
| ATOM | 31991 | CG2  | THR | 2138 | 92.566 | 119.486 | 92.478 | 0.00 | 0.00 |
| ATOM | 31992 | 1HG2 | THR | 2138 | 92.549 | 119.642 | 91.399 | 0.00 | 0.00 |
| ATOM | 31993 | 2HG2 | THR | 2138 | 92.726 | 120.379 | 93.083 | 0.00 | 0.00 |
| ATOM | 31994 | 3HG2 | THR | 2138 | 93.441 | 118.869 | 92.678 | 0.00 | 0.00 |
| ATOM | 31995 | OG1  | THR | 2138 | 90.131 | 119.453 | 92.675 | 0.00 | 0.00 |
| ATOM | 31996 | HG1  | THR | 2138 | 90.266 | 120.347 | 92.996 | 0.00 | 0.00 |
| ATOM | 31997 | C    | THR | 2138 | 90.247 | 116.552 | 93.447 | 0.00 | 0.00 |
| ATOM | 31998 | O    | THR | 2138 | 90.650 | 116.130 | 94.510 | 0.00 | 0.00 |

|            |     |          |        |         |        |      |      |
|------------|-----|----------|--------|---------|--------|------|------|
| ATOM 31999 | N   | GLY 2139 | 89.056 | 116.311 | 93.019 | 0.00 | 0.00 |
| ATOM 32000 | H   | GLY 2139 | 88.793 | 116.760 | 92.153 | 0.00 | 0.00 |
| ATOM 32001 | CA  | GLY 2139 | 88.063 | 115.502 | 93.711 | 0.00 | 0.00 |
| ATOM 32002 | HA2 | GLY 2139 | 87.616 | 116.051 | 94.539 | 0.00 | 0.00 |
| ATOM 32003 | HA3 | GLY 2139 | 87.302 | 115.197 | 92.993 | 0.00 | 0.00 |
| ATOM 32004 | C   | GLY 2139 | 88.591 | 114.213 | 94.205 | 0.00 | 0.00 |
| ATOM 32005 | O   | GLY 2139 | 89.135 | 113.374 | 93.451 | 0.00 | 0.00 |
| ATOM 32006 | N   | ASP 2140 | 88.383 | 113.889 | 95.446 | 0.00 | 0.00 |
| ATOM 32007 | H   | ASP 2140 | 87.958 | 114.593 | 96.033 | 0.00 | 0.00 |
| ATOM 32008 | CA  | ASP 2140 | 88.798 | 112.682 | 96.138 | 0.00 | 0.00 |
| ATOM 32009 | HA  | ASP 2140 | 89.805 | 112.355 | 95.879 | 0.00 | 0.00 |
| ATOM 32010 | CB  | ASP 2140 | 88.858 | 113.003 | 97.664 | 0.00 | 0.00 |
| ATOM 32011 | HB2 | ASP 2140 | 89.144 | 114.051 | 97.750 | 0.00 | 0.00 |
| ATOM 32012 | HB3 | ASP 2140 | 89.542 | 112.341 | 98.195 | 0.00 | 0.00 |
| ATOM 32013 | CG  | ASP 2140 | 87.434 | 113.046 | 98.300 | 0.00 | 0.00 |
| ATOM 32014 | OD1 | ASP 2140 | 86.691 | 113.984 | 97.989 | 0.00 | 0.00 |
| ATOM 32015 | OD2 | ASP 2140 | 87.205 | 112.113 | 99.091 | 0.00 | 0.00 |
| ATOM 32016 | C   | ASP 2140 | 87.903 | 111.452 | 95.883 | 0.00 | 0.00 |
| ATOM 32017 | O   | ASP 2140 | 87.619 | 110.627 | 96.760 | 0.00 | 0.00 |
| ATOM 32018 | N   | ASN 2141 | 87.526 | 111.264 | 94.580 | 0.00 | 0.00 |
| ATOM 32019 | H   | ASN 2141 | 87.903 | 111.866 | 93.862 | 0.00 | 0.00 |
| ATOM 32020 | CA  | ASN 2141 | 86.798 | 110.081 | 94.032 | 0.00 | 0.00 |
| ATOM 32021 | HA  | ASN 2141 | 86.756 | 109.268 | 94.757 | 0.00 | 0.00 |
| ATOM 32022 | CB  | ASN 2141 | 85.420 | 110.608 | 93.763 | 0.00 | 0.00 |
| ATOM 32023 | HB2 | ASN 2141 | 84.754 | 109.897 | 93.274 | 0.00 | 0.00 |
| ATOM 32024 | HB3 | ASN 2141 | 84.906 | 110.684 | 94.722 | 0.00 | 0.00 |

|            |      |          |        |         |        |      |      |
|------------|------|----------|--------|---------|--------|------|------|
| ATOM 32025 | CG   | ASN 2141 | 85.273 | 111.812 | 92.897 | 0.00 | 0.00 |
| ATOM 32026 | OD1  | ASN 2141 | 85.348 | 111.697 | 91.666 | 0.00 | 0.00 |
| ATOM 32027 | ND2  | ASN 2141 | 85.217 | 113.026 | 93.315 | 0.00 | 0.00 |
| ATOM 32028 | 1HD2 | ASN 2141 | 85.105 | 113.766 | 92.636 | 0.00 | 0.00 |
| ATOM 32029 | 2HD2 | ASN 2141 | 85.037 | 113.210 | 94.291 | 0.00 | 0.00 |
| ATOM 32030 | C    | ASN 2141 | 87.560 | 109.618 | 92.776 | 0.00 | 0.00 |
| ATOM 32031 | O    | ASN 2141 | 88.363 | 110.420 | 92.202 | 0.00 | 0.00 |
| ATOM 32032 | N    | ASP 2142 | 87.297 | 108.445 | 92.264 | 0.00 | 0.00 |
| ATOM 32033 | H    | ASP 2142 | 86.779 | 107.817 | 92.861 | 0.00 | 0.00 |
| ATOM 32034 | CA   | ASP 2142 | 87.954 | 108.003 | 91.032 | 0.00 | 0.00 |
| ATOM 32035 | HA   | ASP 2142 | 88.810 | 108.648 | 90.834 | 0.00 | 0.00 |
| ATOM 32036 | CB   | ASP 2142 | 88.487 | 106.609 | 91.131 | 0.00 | 0.00 |
| ATOM 32037 | HB2  | ASP 2142 | 87.629 | 105.943 | 91.217 | 0.00 | 0.00 |
| ATOM 32038 | HB3  | ASP 2142 | 89.019 | 106.307 | 90.228 | 0.00 | 0.00 |
| ATOM 32039 | CG   | ASP 2142 | 89.348 | 106.397 | 92.356 | 0.00 | 0.00 |
| ATOM 32040 | OD1  | ASP 2142 | 89.070 | 105.613 | 93.303 | 0.00 | 0.00 |
| ATOM 32041 | OD2  | ASP 2142 | 90.397 | 107.003 | 92.514 | 0.00 | 0.00 |
| ATOM 32042 | C    | ASP 2142 | 87.151 | 108.326 | 89.731 | 0.00 | 0.00 |
| ATOM 32043 | O    | ASP 2142 | 87.510 | 107.875 | 88.708 | 0.00 | 0.00 |
| ATOM 32044 | N    | ASN 2143 | 86.048 | 109.124 | 89.743 | 0.00 | 0.00 |
| ATOM 32045 | H    | ASN 2143 | 85.846 | 109.532 | 90.644 | 0.00 | 0.00 |
| ATOM 32046 | CA   | ASN 2143 | 84.967 | 109.229 | 88.692 | 0.00 | 0.00 |
| ATOM 32047 | HA   | ASN 2143 | 84.519 | 108.267 | 88.444 | 0.00 | 0.00 |
| ATOM 32048 | CB   | ASN 2143 | 83.856 | 110.128 | 89.232 | 0.00 | 0.00 |
| ATOM 32049 | HB2  | ASN 2143 | 84.376 | 111.045 | 89.509 | 0.00 | 0.00 |
| ATOM 32050 | HB3  | ASN 2143 | 83.206 | 110.319 | 88.378 | 0.00 | 0.00 |

|      |       |      |     |      |        |         |        |      |      |
|------|-------|------|-----|------|--------|---------|--------|------|------|
| ATOM | 32051 | CG   | ASN | 2143 | 83.097 | 109.594 | 90.428 | 0.00 | 0.00 |
| ATOM | 32052 | OD1  | ASN | 2143 | 83.401 | 108.596 | 91.100 | 0.00 | 0.00 |
| ATOM | 32053 | ND2  | ASN | 2143 | 81.984 | 110.245 | 90.662 | 0.00 | 0.00 |
| ATOM | 32054 | 1HD2 | ASN | 2143 | 81.449 | 109.862 | 91.429 | 0.00 | 0.00 |
| ATOM | 32055 | 2HD2 | ASN | 2143 | 81.741 | 111.074 | 90.138 | 0.00 | 0.00 |
| ATOM | 32056 | C    | ASN | 2143 | 85.536 | 109.784 | 87.428 | 0.00 | 0.00 |
| ATOM | 32057 | O    | ASN | 2143 | 85.181 | 109.328 | 86.333 | 0.00 | 0.00 |
| ATOM | 32058 | N    | PHE | 2144 | 86.493 | 110.723 | 87.457 | 0.00 | 0.00 |
| ATOM | 32059 | H    | PHE | 2144 | 87.039 | 110.875 | 88.293 | 0.00 | 0.00 |
| ATOM | 32060 | CA   | PHE | 2144 | 87.197 | 111.352 | 86.290 | 0.00 | 0.00 |
| ATOM | 32061 | HA   | PHE | 2144 | 86.567 | 111.534 | 85.420 | 0.00 | 0.00 |
| ATOM | 32062 | CB   | PHE | 2144 | 87.907 | 112.607 | 86.730 | 0.00 | 0.00 |
| ATOM | 32063 | HB2  | PHE | 2144 | 87.337 | 113.022 | 87.562 | 0.00 | 0.00 |
| ATOM | 32064 | HB3  | PHE | 2144 | 88.866 | 112.526 | 87.241 | 0.00 | 0.00 |
| ATOM | 32065 | CG   | PHE | 2144 | 88.025 | 113.645 | 85.576 | 0.00 | 0.00 |
| ATOM | 32066 | CD1  | PHE | 2144 | 87.079 | 114.705 | 85.496 | 0.00 | 0.00 |
| ATOM | 32067 | HD1  | PHE | 2144 | 86.238 | 114.627 | 86.168 | 0.00 | 0.00 |
| ATOM | 32068 | CE1  | PHE | 2144 | 87.255 | 115.800 | 84.664 | 0.00 | 0.00 |
| ATOM | 32069 | HE1  | PHE | 2144 | 86.527 | 116.598 | 84.676 | 0.00 | 0.00 |
| ATOM | 32070 | CZ   | PHE | 2144 | 88.408 | 115.991 | 83.905 | 0.00 | 0.00 |
| ATOM | 32071 | HZ   | PHE | 2144 | 88.584 | 116.879 | 83.316 | 0.00 | 0.00 |
| ATOM | 32072 | CE2  | PHE | 2144 | 89.328 | 114.891 | 83.948 | 0.00 | 0.00 |
| ATOM | 32073 | HE2  | PHE | 2144 | 90.266 | 114.984 | 83.422 | 0.00 | 0.00 |
| ATOM | 32074 | CD2  | PHE | 2144 | 89.156 | 113.729 | 84.756 | 0.00 | 0.00 |
| ATOM | 32075 | HD2  | PHE | 2144 | 89.907 | 112.952 | 84.755 | 0.00 | 0.00 |
| ATOM | 32076 | C    | PHE | 2144 | 88.259 | 110.414 | 85.592 | 0.00 | 0.00 |

|      |       |      |     |      |        |         |        |      |      |
|------|-------|------|-----|------|--------|---------|--------|------|------|
| ATOM | 32077 | O    | PHE | 2144 | 88.363 | 110.441 | 84.394 | 0.00 | 0.00 |
| ATOM | 32078 | N    | ARG | 2145 | 88.911 | 109.553 | 86.458 | 0.00 | 0.00 |
| ATOM | 32079 | H    | ARG | 2145 | 88.861 | 109.695 | 87.456 | 0.00 | 0.00 |
| ATOM | 32080 | CA   | ARG | 2145 | 89.487 | 108.350 | 85.836 | 0.00 | 0.00 |
| ATOM | 32081 | HA   | ARG | 2145 | 90.127 | 108.591 | 84.987 | 0.00 | 0.00 |
| ATOM | 32082 | CB   | ARG | 2145 | 90.437 | 107.735 | 86.928 | 0.00 | 0.00 |
| ATOM | 32083 | HB2  | ARG | 2145 | 91.238 | 108.383 | 87.284 | 0.00 | 0.00 |
| ATOM | 32084 | HB3  | ARG | 2145 | 89.916 | 107.417 | 87.831 | 0.00 | 0.00 |
| ATOM | 32085 | CG   | ARG | 2145 | 91.116 | 106.514 | 86.310 | 0.00 | 0.00 |
| ATOM | 32086 | HG2  | ARG | 2145 | 90.402 | 105.702 | 86.451 | 0.00 | 0.00 |
| ATOM | 32087 | HG3  | ARG | 2145 | 91.401 | 106.620 | 85.264 | 0.00 | 0.00 |
| ATOM | 32088 | CD   | ARG | 2145 | 92.404 | 106.161 | 87.103 | 0.00 | 0.00 |
| ATOM | 32089 | HD2  | ARG | 2145 | 92.140 | 106.212 | 88.159 | 0.00 | 0.00 |
| ATOM | 32090 | HD3  | ARG | 2145 | 92.715 | 105.157 | 86.816 | 0.00 | 0.00 |
| ATOM | 32091 | NE   | ARG | 2145 | 93.608 | 106.954 | 86.812 | 0.00 | 0.00 |
| ATOM | 32092 | HE   | ARG | 2145 | 93.939 | 106.825 | 85.866 | 0.00 | 0.00 |
| ATOM | 32093 | CZ   | ARG | 2145 | 94.567 | 107.315 | 87.620 | 0.00 | 0.00 |
| ATOM | 32094 | NH1  | ARG | 2145 | 94.385 | 107.401 | 88.909 | 0.00 | 0.00 |
| ATOM | 32095 | 1HH1 | ARG | 2145 | 95.111 | 107.609 | 89.579 | 0.00 | 0.00 |
| ATOM | 32096 | 2HH1 | ARG | 2145 | 93.559 | 106.945 | 89.272 | 0.00 | 0.00 |
| ATOM | 32097 | NH2  | ARG | 2145 | 95.666 | 107.862 | 87.190 | 0.00 | 0.00 |
| ATOM | 32098 | 1HH2 | ARG | 2145 | 96.273 | 108.322 | 87.854 | 0.00 | 0.00 |
| ATOM | 32099 | 2HH2 | ARG | 2145 | 95.645 | 108.092 | 86.207 | 0.00 | 0.00 |
| ATOM | 32100 | C    | ARG | 2145 | 88.460 | 107.357 | 85.240 | 0.00 | 0.00 |
| ATOM | 32101 | O    | ARG | 2145 | 88.487 | 107.174 | 84.000 | 0.00 | 0.00 |
| ATOM | 32102 | N    | VAL | 2146 | 87.527 | 106.790 | 86.031 | 0.00 | 0.00 |

|      |       |      |     |      |        |         |        |      |      |
|------|-------|------|-----|------|--------|---------|--------|------|------|
| ATOM | 32103 | H    | VAL | 2146 | 87.558 | 107.133 | 86.980 | 0.00 | 0.00 |
| ATOM | 32104 | CA   | VAL | 2146 | 86.512 | 105.864 | 85.519 | 0.00 | 0.00 |
| ATOM | 32105 | HA   | VAL | 2146 | 86.887 | 104.870 | 85.272 | 0.00 | 0.00 |
| ATOM | 32106 | CB   | VAL | 2146 | 85.428 | 105.665 | 86.627 | 0.00 | 0.00 |
| ATOM | 32107 | HB   | VAL | 2146 | 85.270 | 106.612 | 87.142 | 0.00 | 0.00 |
| ATOM | 32108 | CG1  | VAL | 2146 | 84.104 | 104.965 | 86.272 | 0.00 | 0.00 |
| ATOM | 32109 | 1HG1 | VAL | 2146 | 83.433 | 104.889 | 87.128 | 0.00 | 0.00 |
| ATOM | 32110 | 2HG1 | VAL | 2146 | 83.516 | 105.522 | 85.541 | 0.00 | 0.00 |
| ATOM | 32111 | 3HG1 | VAL | 2146 | 84.274 | 103.949 | 85.918 | 0.00 | 0.00 |
| ATOM | 32112 | CG2  | VAL | 2146 | 86.038 | 104.821 | 87.750 | 0.00 | 0.00 |
| ATOM | 32113 | 1HG2 | VAL | 2146 | 85.297 | 104.683 | 88.537 | 0.00 | 0.00 |
| ATOM | 32114 | 2HG2 | VAL | 2146 | 86.321 | 103.848 | 87.348 | 0.00 | 0.00 |
| ATOM | 32115 | 3HG2 | VAL | 2146 | 86.924 | 105.308 | 88.159 | 0.00 | 0.00 |
| ATOM | 32116 | C    | VAL | 2146 | 85.840 | 106.323 | 84.200 | 0.00 | 0.00 |
| ATOM | 32117 | O    | VAL | 2146 | 85.789 | 105.510 | 83.274 | 0.00 | 0.00 |
| ATOM | 32118 | N    | LYS | 2147 | 85.389 | 107.596 | 83.968 | 0.00 | 0.00 |
| ATOM | 32119 | H    | LYS | 2147 | 85.548 | 108.200 | 84.762 | 0.00 | 0.00 |
| ATOM | 32120 | CA   | LYS | 2147 | 84.885 | 108.170 | 82.701 | 0.00 | 0.00 |
| ATOM | 32121 | HA   | LYS | 2147 | 83.995 | 107.570 | 82.509 | 0.00 | 0.00 |
| ATOM | 32122 | CB   | LYS | 2147 | 84.470 | 109.616 | 82.852 | 0.00 | 0.00 |
| ATOM | 32123 | HB2  | LYS | 2147 | 85.190 | 110.114 | 83.501 | 0.00 | 0.00 |
| ATOM | 32124 | HB3  | LYS | 2147 | 84.456 | 110.049 | 81.852 | 0.00 | 0.00 |
| ATOM | 32125 | CG   | LYS | 2147 | 83.104 | 109.810 | 83.539 | 0.00 | 0.00 |
| ATOM | 32126 | HG2  | LYS | 2147 | 82.228 | 109.551 | 82.943 | 0.00 | 0.00 |
| ATOM | 32127 | HG3  | LYS | 2147 | 83.137 | 109.038 | 84.308 | 0.00 | 0.00 |
| ATOM | 32128 | CD   | LYS | 2147 | 82.963 | 111.137 | 84.176 | 0.00 | 0.00 |

|      |       |     |     |      |        |         |        |      |      |
|------|-------|-----|-----|------|--------|---------|--------|------|------|
| ATOM | 32129 | HD2 | LYS | 2147 | 83.833 | 111.311 | 84.811 | 0.00 | 0.00 |
| ATOM | 32130 | HD3 | LYS | 2147 | 82.660 | 111.849 | 83.409 | 0.00 | 0.00 |
| ATOM | 32131 | CE  | LYS | 2147 | 81.741 | 111.138 | 85.173 | 0.00 | 0.00 |
| ATOM | 32132 | HE2 | LYS | 2147 | 80.863 | 110.899 | 84.573 | 0.00 | 0.00 |
| ATOM | 32133 | HE3 | LYS | 2147 | 81.972 | 110.406 | 85.946 | 0.00 | 0.00 |
| ATOM | 32134 | NZ  | LYS | 2147 | 81.479 | 112.438 | 85.839 | 0.00 | 0.00 |
| ATOM | 32135 | HZ1 | LYS | 2147 | 81.175 | 113.126 | 85.165 | 0.00 | 0.00 |
| ATOM | 32136 | HZ2 | LYS | 2147 | 80.823 | 112.427 | 86.608 | 0.00 | 0.00 |
| ATOM | 32137 | HZ3 | LYS | 2147 | 82.303 | 112.767 | 86.321 | 0.00 | 0.00 |
| ATOM | 32138 | C   | LYS | 2147 | 85.685 | 107.934 | 81.454 | 0.00 | 0.00 |
| ATOM | 32139 | O   | LYS | 2147 | 85.222 | 107.845 | 80.303 | 0.00 | 0.00 |
| ATOM | 32140 | N   | ARG | 2148 | 87.020 | 107.656 | 81.657 | 0.00 | 0.00 |
| ATOM | 32141 | H   | ARG | 2148 | 87.349 | 107.724 | 82.609 | 0.00 | 0.00 |
| ATOM | 32142 | CA  | ARG | 2148 | 88.024 | 107.573 | 80.595 | 0.00 | 0.00 |
| ATOM | 32143 | HA  | ARG | 2148 | 87.577 | 108.047 | 79.721 | 0.00 | 0.00 |
| ATOM | 32144 | CB  | ARG | 2148 | 89.370 | 108.156 | 81.143 | 0.00 | 0.00 |
| ATOM | 32145 | HB2 | ARG | 2148 | 89.193 | 109.200 | 81.399 | 0.00 | 0.00 |
| ATOM | 32146 | HB3 | ARG | 2148 | 89.665 | 107.639 | 82.056 | 0.00 | 0.00 |
| ATOM | 32147 | CG  | ARG | 2148 | 90.553 | 108.075 | 80.158 | 0.00 | 0.00 |
| ATOM | 32148 | HG2 | ARG | 2148 | 90.986 | 107.076 | 80.200 | 0.00 | 0.00 |
| ATOM | 32149 | HG3 | ARG | 2148 | 90.266 | 108.208 | 79.115 | 0.00 | 0.00 |
| ATOM | 32150 | CD  | ARG | 2148 | 91.603 | 109.006 | 80.569 | 0.00 | 0.00 |
| ATOM | 32151 | HD2 | ARG | 2148 | 91.803 | 108.921 | 81.637 | 0.00 | 0.00 |
| ATOM | 32152 | HD3 | ARG | 2148 | 92.454 | 108.634 | 79.998 | 0.00 | 0.00 |
| ATOM | 32153 | NE  | ARG | 2148 | 91.325 | 110.443 | 80.266 | 0.00 | 0.00 |
| ATOM | 32154 | HE  | ARG | 2148 | 90.720 | 110.629 | 79.479 | 0.00 | 0.00 |



|      |       |      |     |      |        |         |        |      |      |
|------|-------|------|-----|------|--------|---------|--------|------|------|
| ATOM | 32155 | CZ   | ARG | 2148 | 91.953 | 111.521 | 80.802 | 0.00 | 0.00 |
| ATOM | 32156 | NH1  | ARG | 2148 | 93.029 | 111.430 | 81.505 | 0.00 | 0.00 |
| ATOM | 32157 | 1HH1 | ARG | 2148 | 93.555 | 112.256 | 81.755 | 0.00 | 0.00 |
| ATOM | 32158 | 2HH1 | ARG | 2148 | 93.668 | 110.673 | 81.306 | 0.00 | 0.00 |
| ATOM | 32159 | NH2  | ARG | 2148 | 91.530 | 112.750 | 80.662 | 0.00 | 0.00 |
| ATOM | 32160 | 1HH2 | ARG | 2148 | 92.122 | 113.417 | 81.136 | 0.00 | 0.00 |
| ATOM | 32161 | 2HH2 | ARG | 2148 | 90.724 | 113.074 | 80.147 | 0.00 | 0.00 |
| ATOM | 32162 | C    | ARG | 2148 | 88.121 | 106.118 | 80.079 | 0.00 | 0.00 |
| ATOM | 32163 | O    | ARG | 2148 | 88.431 | 105.957 | 78.878 | 0.00 | 0.00 |
| ATOM | 32164 | N    | TYR | 2149 | 87.713 | 105.170 | 80.985 | 0.00 | 0.00 |
| ATOM | 32165 | H    | TYR | 2149 | 87.513 | 105.521 | 81.911 | 0.00 | 0.00 |
| ATOM | 32166 | CA   | TYR | 2149 | 87.763 | 103.710 | 80.805 | 0.00 | 0.00 |
| ATOM | 32167 | HA   | TYR | 2149 | 88.515 | 103.618 | 80.021 | 0.00 | 0.00 |
| ATOM | 32168 | CB   | TYR | 2149 | 88.330 | 103.118 | 82.064 | 0.00 | 0.00 |
| ATOM | 32169 | HB2  | TYR | 2149 | 87.736 | 103.542 | 82.873 | 0.00 | 0.00 |
| ATOM | 32170 | HB3  | TYR | 2149 | 88.368 | 102.028 | 82.076 | 0.00 | 0.00 |
| ATOM | 32171 | CG   | TYR | 2149 | 89.829 | 103.460 | 82.127 | 0.00 | 0.00 |
| ATOM | 32172 | CD1  | TYR | 2149 | 90.366 | 104.605 | 82.596 | 0.00 | 0.00 |
| ATOM | 32173 | HD1  | TYR | 2149 | 89.630 | 105.346 | 82.870 | 0.00 | 0.00 |
| ATOM | 32174 | CE1  | TYR | 2149 | 91.717 | 104.846 | 82.710 | 0.00 | 0.00 |
| ATOM | 32175 | HE1  | TYR | 2149 | 92.108 | 105.752 | 83.147 | 0.00 | 0.00 |
| ATOM | 32176 | CZ   | TYR | 2149 | 92.626 | 103.855 | 82.332 | 0.00 | 0.00 |
| ATOM | 32177 | OH   | TYR | 2149 | 93.894 | 104.035 | 82.582 | 0.00 | 0.00 |
| ATOM | 32178 | HH   | TYR | 2149 | 93.978 | 104.658 | 83.307 | 0.00 | 0.00 |
| ATOM | 32179 | CE2  | TYR | 2149 | 92.162 | 102.703 | 81.708 | 0.00 | 0.00 |
| ATOM | 32180 | HE2  | TYR | 2149 | 92.767 | 101.927 | 81.262 | 0.00 | 0.00 |

|      |       |      |     |      |        |         |        |      |      |
|------|-------|------|-----|------|--------|---------|--------|------|------|
| ATOM | 32181 | CD2  | TYR | 2149 | 90.781 | 102.480 | 81.671 | 0.00 | 0.00 |
| ATOM | 32182 | HD2  | TYR | 2149 | 90.402 | 101.540 | 81.297 | 0.00 | 0.00 |
| ATOM | 32183 | C    | TYR | 2149 | 86.447 | 103.101 | 80.377 | 0.00 | 0.00 |
| ATOM | 32184 | O    | TYR | 2149 | 86.470 | 102.278 | 79.522 | 0.00 | 0.00 |
| ATOM | 32185 | N    | ILE | 2150 | 85.357 | 103.536 | 80.947 | 0.00 | 0.00 |
| ATOM | 32186 | H    | ILE | 2150 | 85.475 | 104.203 | 81.696 | 0.00 | 0.00 |
| ATOM | 32187 | CA   | ILE | 2150 | 84.043 | 103.307 | 80.374 | 0.00 | 0.00 |
| ATOM | 32188 | HA   | ILE | 2150 | 83.834 | 102.238 | 80.359 | 0.00 | 0.00 |
| ATOM | 32189 | CB   | ILE | 2150 | 82.925 | 103.882 | 81.302 | 0.00 | 0.00 |
| ATOM | 32190 | HB   | ILE | 2150 | 82.870 | 103.689 | 82.373 | 0.00 | 0.00 |
| ATOM | 32191 | CG2  | ILE | 2150 | 82.772 | 105.463 | 81.216 | 0.00 | 0.00 |
| ATOM | 32192 | 1HG2 | ILE | 2150 | 83.762 | 105.873 | 81.412 | 0.00 | 0.00 |
| ATOM | 32193 | 2HG2 | ILE | 2150 | 82.324 | 105.762 | 80.269 | 0.00 | 0.00 |
| ATOM | 32194 | 3HG2 | ILE | 2150 | 82.133 | 105.860 | 82.005 | 0.00 | 0.00 |
| ATOM | 32195 | CG1  | ILE | 2150 | 81.551 | 103.462 | 80.873 | 0.00 | 0.00 |
| ATOM | 32196 | 2HG1 | ILE | 2150 | 80.820 | 104.066 | 81.410 | 0.00 | 0.00 |
| ATOM | 32197 | 3HG1 | ILE | 2150 | 81.347 | 103.657 | 79.820 | 0.00 | 0.00 |
| ATOM | 32198 | CD1  | ILE | 2150 | 81.299 | 101.974 | 81.069 | 0.00 | 0.00 |
| ATOM | 32199 | 1HD1 | ILE | 2150 | 81.368 | 101.610 | 82.095 | 0.00 | 0.00 |
| ATOM | 32200 | 2HD1 | ILE | 2150 | 80.298 | 101.733 | 80.712 | 0.00 | 0.00 |
| ATOM | 32201 | 3HD1 | ILE | 2150 | 81.954 | 101.319 | 80.494 | 0.00 | 0.00 |
| ATOM | 32202 | C    | ILE | 2150 | 83.896 | 103.731 | 78.922 | 0.00 | 0.00 |
| ATOM | 32203 | O    | ILE | 2150 | 83.263 | 103.035 | 78.159 | 0.00 | 0.00 |
| ATOM | 32204 | N    | ALA | 2151 | 84.364 | 104.967 | 78.552 | 0.00 | 0.00 |
| ATOM | 32205 | H    | ALA | 2151 | 84.620 | 105.720 | 79.175 | 0.00 | 0.00 |
| ATOM | 32206 | CA   | ALA | 2151 | 84.158 | 105.353 | 77.112 | 0.00 | 0.00 |

|      |       |     |     |      |        |         |        |      |      |
|------|-------|-----|-----|------|--------|---------|--------|------|------|
| ATOM | 32207 | HA  | ALA | 2151 | 83.121 | 105.148 | 76.849 | 0.00 | 0.00 |
| ATOM | 32208 | CB  | ALA | 2151 | 84.450 | 106.861 | 76.907 | 0.00 | 0.00 |
| ATOM | 32209 | HB1 | ALA | 2151 | 84.529 | 107.115 | 75.850 | 0.00 | 0.00 |
| ATOM | 32210 | HB2 | ALA | 2151 | 83.740 | 107.449 | 77.489 | 0.00 | 0.00 |
| ATOM | 32211 | HB3 | ALA | 2151 | 85.423 | 107.148 | 77.304 | 0.00 | 0.00 |
| ATOM | 32212 | C   | ALA | 2151 | 84.827 | 104.451 | 76.037 | 0.00 | 0.00 |
| ATOM | 32213 | O   | ALA | 2151 | 84.422 | 104.365 | 74.900 | 0.00 | 0.00 |
| ATOM | 32214 | N   | LYS | 2152 | 85.933 | 103.763 | 76.438 | 0.00 | 0.00 |
| ATOM | 32215 | H   | LYS | 2152 | 86.194 | 103.958 | 77.394 | 0.00 | 0.00 |
| ATOM | 32216 | CA  | LYS | 2152 | 86.846 | 103.104 | 75.427 | 0.00 | 0.00 |
| ATOM | 32217 | HA  | LYS | 2152 | 87.240 | 103.831 | 74.717 | 0.00 | 0.00 |
| ATOM | 32218 | CB  | LYS | 2152 | 88.086 | 102.489 | 76.158 | 0.00 | 0.00 |
| ATOM | 32219 | HB2 | LYS | 2152 | 87.812 | 101.758 | 76.919 | 0.00 | 0.00 |
| ATOM | 32220 | HB3 | LYS | 2152 | 88.816 | 102.141 | 75.426 | 0.00 | 0.00 |
| ATOM | 32221 | CG  | LYS | 2152 | 88.876 | 103.585 | 76.857 | 0.00 | 0.00 |
| ATOM | 32222 | HG2 | LYS | 2152 | 88.930 | 104.479 | 76.235 | 0.00 | 0.00 |
| ATOM | 32223 | HG3 | LYS | 2152 | 88.369 | 103.821 | 77.793 | 0.00 | 0.00 |
| ATOM | 32224 | CD  | LYS | 2152 | 90.245 | 103.035 | 77.298 | 0.00 | 0.00 |
| ATOM | 32225 | HD2 | LYS | 2152 | 90.036 | 102.204 | 77.972 | 0.00 | 0.00 |
| ATOM | 32226 | HD3 | LYS | 2152 | 90.788 | 102.671 | 76.425 | 0.00 | 0.00 |
| ATOM | 32227 | CE  | LYS | 2152 | 91.010 | 104.030 | 78.182 | 0.00 | 0.00 |
| ATOM | 32228 | HE2 | LYS | 2152 | 90.285 | 104.331 | 78.939 | 0.00 | 0.00 |
| ATOM | 32229 | HE3 | LYS | 2152 | 91.812 | 103.591 | 78.775 | 0.00 | 0.00 |
| ATOM | 32230 | NZ  | LYS | 2152 | 91.582 | 105.227 | 77.522 | 0.00 | 0.00 |
| ATOM | 32231 | HZ1 | LYS | 2152 | 91.930 | 105.906 | 78.183 | 0.00 | 0.00 |
| ATOM | 32232 | HZ2 | LYS | 2152 | 92.282 | 104.930 | 76.857 | 0.00 | 0.00 |

|      |       |     |     |      |        |         |        |      |      |
|------|-------|-----|-----|------|--------|---------|--------|------|------|
| ATOM | 32233 | HZ3 | LYS | 2152 | 90.896 | 105.729 | 76.977 | 0.00 | 0.00 |
| ATOM | 32234 | C   | LYS | 2152 | 86.181 | 101.971 | 74.636 | 0.00 | 0.00 |
| ATOM | 32235 | O   | LYS | 2152 | 86.654 | 101.641 | 73.576 | 0.00 | 0.00 |
| ATOM | 32236 | N   | TYR | 2153 | 85.208 | 101.334 | 75.304 | 0.00 | 0.00 |
| ATOM | 32237 | H   | TYR | 2153 | 84.958 | 101.641 | 76.233 | 0.00 | 0.00 |
| ATOM | 32238 | CA  | TYR | 2153 | 84.542 | 100.057 | 74.867 | 0.00 | 0.00 |
| ATOM | 32239 | HA  | TYR | 2153 | 84.966 | 99.714  | 73.924 | 0.00 | 0.00 |
| ATOM | 32240 | CB  | TYR | 2153 | 84.982 | 98.955  | 75.793 | 0.00 | 0.00 |
| ATOM | 32241 | HB2 | TYR | 2153 | 84.486 | 98.038  | 75.474 | 0.00 | 0.00 |
| ATOM | 32242 | HB3 | TYR | 2153 | 86.065 | 98.956  | 75.672 | 0.00 | 0.00 |
| ATOM | 32243 | CG  | TYR | 2153 | 84.576 | 99.006  | 77.256 | 0.00 | 0.00 |
| ATOM | 32244 | CD1 | TYR | 2153 | 83.266 | 98.553  | 77.593 | 0.00 | 0.00 |
| ATOM | 32245 | HD1 | TYR | 2153 | 82.532 | 98.353  | 76.826 | 0.00 | 0.00 |
| ATOM | 32246 | CE1 | TYR | 2153 | 82.755 | 98.554  | 78.933 | 0.00 | 0.00 |
| ATOM | 32247 | HE1 | TYR | 2153 | 81.732 | 98.250  | 79.099 | 0.00 | 0.00 |
| ATOM | 32248 | CZ  | TYR | 2153 | 83.583 | 98.957  | 79.939 | 0.00 | 0.00 |
| ATOM | 32249 | OH  | TYR | 2153 | 83.066 | 98.909  | 81.182 | 0.00 | 0.00 |
| ATOM | 32250 | HH  | TYR | 2153 | 82.306 | 98.330  | 81.279 | 0.00 | 0.00 |
| ATOM | 32251 | CE2 | TYR | 2153 | 84.857 | 99.535  | 79.655 | 0.00 | 0.00 |
| ATOM | 32252 | HE2 | TYR | 2153 | 85.482 | 99.866  | 80.471 | 0.00 | 0.00 |
| ATOM | 32253 | CD2 | TYR | 2153 | 85.349 | 99.609  | 78.305 | 0.00 | 0.00 |
| ATOM | 32254 | HD2 | TYR | 2153 | 86.240 | 100.173 | 78.073 | 0.00 | 0.00 |
| ATOM | 32255 | C   | TYR | 2153 | 83.078 | 100.256 | 74.605 | 0.00 | 0.00 |
| ATOM | 32256 | O   | TYR | 2153 | 82.321 | 99.306  | 74.693 | 0.00 | 0.00 |
| ATOM | 32257 | N   | THR | 2154 | 82.590 | 101.508 | 74.444 | 0.00 | 0.00 |
| ATOM | 32258 | H   | THR | 2154 | 83.252 | 102.263 | 74.341 | 0.00 | 0.00 |

|      |       |      |     |      |        |         |        |      |      |
|------|-------|------|-----|------|--------|---------|--------|------|------|
| ATOM | 32259 | CA   | THR | 2154 | 81.167 | 101.808 | 74.427 | 0.00 | 0.00 |
| ATOM | 32260 | HA   | THR | 2154 | 80.618 | 100.923 | 74.105 | 0.00 | 0.00 |
| ATOM | 32261 | CB   | THR | 2154 | 80.689 | 102.105 | 75.874 | 0.00 | 0.00 |
| ATOM | 32262 | HB   | THR | 2154 | 79.616 | 102.206 | 75.713 | 0.00 | 0.00 |
| ATOM | 32263 | CG2  | THR | 2154 | 80.991 | 101.042 | 76.863 | 0.00 | 0.00 |
| ATOM | 32264 | 1HG2 | THR | 2154 | 80.461 | 100.153 | 76.523 | 0.00 | 0.00 |
| ATOM | 32265 | 2HG2 | THR | 2154 | 82.058 | 100.842 | 76.963 | 0.00 | 0.00 |
| ATOM | 32266 | 3HG2 | THR | 2154 | 80.498 | 101.244 | 77.814 | 0.00 | 0.00 |
| ATOM | 32267 | OG1  | THR | 2154 | 81.195 | 103.323 | 76.256 | 0.00 | 0.00 |
| ATOM | 32268 | HG1  | THR | 2154 | 81.712 | 103.276 | 77.063 | 0.00 | 0.00 |
| ATOM | 32269 | C    | THR | 2154 | 80.919 | 102.890 | 73.394 | 0.00 | 0.00 |
| ATOM | 32270 | O    | THR | 2154 | 80.665 | 102.530 | 72.271 | 0.00 | 0.00 |
| ATOM | 32271 | N    | ILE | 2155 | 80.975 | 104.205 | 73.749 | 0.00 | 0.00 |
| ATOM | 32272 | H    | ILE | 2155 | 80.924 | 104.354 | 74.746 | 0.00 | 0.00 |
| ATOM | 32273 | CA   | ILE | 2155 | 80.601 | 105.303 | 72.861 | 0.00 | 0.00 |
| ATOM | 32274 | HA   | ILE | 2155 | 79.718 | 104.943 | 72.332 | 0.00 | 0.00 |
| ATOM | 32275 | CB   | ILE | 2155 | 80.193 | 106.553 | 73.768 | 0.00 | 0.00 |
| ATOM | 32276 | HB   | ILE | 2155 | 79.288 | 106.312 | 74.326 | 0.00 | 0.00 |
| ATOM | 32277 | CG2  | ILE | 2155 | 81.300 | 106.975 | 74.748 | 0.00 | 0.00 |
| ATOM | 32278 | 1HG2 | ILE | 2155 | 81.474 | 106.322 | 75.604 | 0.00 | 0.00 |
| ATOM | 32279 | 2HG2 | ILE | 2155 | 82.257 | 107.159 | 74.260 | 0.00 | 0.00 |
| ATOM | 32280 | 3HG2 | ILE | 2155 | 80.997 | 107.939 | 75.158 | 0.00 | 0.00 |
| ATOM | 32281 | CG1  | ILE | 2155 | 79.835 | 107.713 | 72.801 | 0.00 | 0.00 |
| ATOM | 32282 | 2HG1 | ILE | 2155 | 79.538 | 108.540 | 73.446 | 0.00 | 0.00 |
| ATOM | 32283 | 3HG1 | ILE | 2155 | 80.667 | 108.175 | 72.269 | 0.00 | 0.00 |
| ATOM | 32284 | CD1  | ILE | 2155 | 78.662 | 107.521 | 71.902 | 0.00 | 0.00 |

|      |       |      |     |      |        |         |        |      |      |
|------|-------|------|-----|------|--------|---------|--------|------|------|
| ATOM | 32285 | 1HD1 | ILE | 2155 | 78.429 | 108.512 | 71.512 | 0.00 | 0.00 |
| ATOM | 32286 | 2HD1 | ILE | 2155 | 78.822 | 106.833 | 71.073 | 0.00 | 0.00 |
| ATOM | 32287 | 3HD1 | ILE | 2155 | 77.869 | 107.125 | 72.536 | 0.00 | 0.00 |
| ATOM | 32288 | C    | ILE | 2155 | 81.739 | 105.619 | 71.910 | 0.00 | 0.00 |
| ATOM | 32289 | O    | ILE | 2155 | 81.479 | 105.932 | 70.752 | 0.00 | 0.00 |
| ATOM | 32290 | N    | ASN | 2156 | 83.049 | 105.578 | 72.288 | 0.00 | 0.00 |
| ATOM | 32291 | H    | ASN | 2156 | 83.271 | 105.396 | 73.256 | 0.00 | 0.00 |
| ATOM | 32292 | CA   | ASN | 2156 | 84.143 | 105.812 | 71.376 | 0.00 | 0.00 |
| ATOM | 32293 | HA   | ASN | 2156 | 83.951 | 106.821 | 71.010 | 0.00 | 0.00 |
| ATOM | 32294 | CB   | ASN | 2156 | 85.494 | 105.807 | 72.142 | 0.00 | 0.00 |
| ATOM | 32295 | HB2  | ASN | 2156 | 85.664 | 104.963 | 72.810 | 0.00 | 0.00 |
| ATOM | 32296 | HB3  | ASN | 2156 | 86.267 | 105.953 | 71.388 | 0.00 | 0.00 |
| ATOM | 32297 | CG   | ASN | 2156 | 85.726 | 106.955 | 73.054 | 0.00 | 0.00 |
| ATOM | 32298 | OD1  | ASN | 2156 | 84.958 | 107.925 | 73.355 | 0.00 | 0.00 |
| ATOM | 32299 | ND2  | ASN | 2156 | 86.863 | 106.891 | 73.726 | 0.00 | 0.00 |
| ATOM | 32300 | 1HD2 | ASN | 2156 | 86.859 | 107.637 | 74.406 | 0.00 | 0.00 |
| ATOM | 32301 | 2HD2 | ASN | 2156 | 87.639 | 106.270 | 73.548 | 0.00 | 0.00 |
| ATOM | 32302 | C    | ASN | 2156 | 84.211 | 104.834 | 70.181 | 0.00 | 0.00 |
| ATOM | 32303 | O    | ASN | 2156 | 84.320 | 105.316 | 69.041 | 0.00 | 0.00 |
| ATOM | 32304 | N    | PRO | 2157 | 84.175 | 103.527 | 70.397 | 0.00 | 0.00 |
| ATOM | 32305 | CD   | PRO | 2157 | 84.132 | 102.804 | 71.643 | 0.00 | 0.00 |
| ATOM | 32306 | HD2  | PRO | 2157 | 83.378 | 103.142 | 72.354 | 0.00 | 0.00 |
| ATOM | 32307 | HD3  | PRO | 2157 | 85.149 | 102.913 | 72.021 | 0.00 | 0.00 |
| ATOM | 32308 | CG   | PRO | 2157 | 83.790 | 101.412 | 71.329 | 0.00 | 0.00 |
| ATOM | 32309 | HG2  | PRO | 2157 | 84.343 | 100.721 | 71.965 | 0.00 | 0.00 |
| ATOM | 32310 | HG3  | PRO | 2157 | 82.709 | 101.348 | 71.205 | 0.00 | 0.00 |

|            |              |        |         |        |      |      |
|------------|--------------|--------|---------|--------|------|------|
| ATOM 32311 | CB PRO 2157  | 84.406 | 101.263 | 69.934 | 0.00 | 0.00 |
| ATOM 32312 | HB2 PRO 2157 | 85.473 | 101.188 | 70.142 | 0.00 | 0.00 |
| ATOM 32313 | HB3 PRO 2157 | 84.044 | 100.453 | 69.301 | 0.00 | 0.00 |
| ATOM 32314 | CA PRO 2157  | 84.148 | 102.591 | 69.278 | 0.00 | 0.00 |
| ATOM 32315 | HA PRO 2157  | 85.019 | 102.718 | 68.635 | 0.00 | 0.00 |
| ATOM 32316 | C PRO 2157   | 82.877 | 102.623 | 68.435 | 0.00 | 0.00 |
| ATOM 32317 | O PRO 2157   | 82.890 | 102.355 | 67.206 | 0.00 | 0.00 |
| ATOM 32318 | N ALA 2158   | 81.774 | 103.071 | 69.070 | 0.00 | 0.00 |
| ATOM 32319 | H ALA 2158   | 81.820 | 103.471 | 69.997 | 0.00 | 0.00 |
| ATOM 32320 | CA ALA 2158  | 80.567 | 103.497 | 68.376 | 0.00 | 0.00 |
| ATOM 32321 | HA ALA 2158  | 80.190 | 102.654 | 67.798 | 0.00 | 0.00 |
| ATOM 32322 | CB ALA 2158  | 79.419 | 103.811 | 69.382 | 0.00 | 0.00 |
| ATOM 32323 | HB1 ALA 2158 | 79.577 | 104.630 | 70.083 | 0.00 | 0.00 |
| ATOM 32324 | HB2 ALA 2158 | 78.506 | 103.954 | 68.804 | 0.00 | 0.00 |
| ATOM 32325 | HB3 ALA 2158 | 79.362 | 102.949 | 70.047 | 0.00 | 0.00 |
| ATOM 32326 | C ALA 2158   | 80.823 | 104.700 | 67.414 | 0.00 | 0.00 |
| ATOM 32327 | O ALA 2158   | 80.387 | 104.633 | 66.270 | 0.00 | 0.00 |
| ATOM 32328 | N LEU 2159   | 81.399 | 105.759 | 67.885 | 0.00 | 0.00 |
| ATOM 32329 | H LEU 2159   | 81.715 | 105.846 | 68.841 | 0.00 | 0.00 |
| ATOM 32330 | CA LEU 2159  | 81.730 | 106.859 | 67.037 | 0.00 | 0.00 |
| ATOM 32331 | HA LEU 2159  | 80.793 | 107.080 | 66.525 | 0.00 | 0.00 |
| ATOM 32332 | CB LEU 2159  | 82.233 | 108.016 | 67.912 | 0.00 | 0.00 |
| ATOM 32333 | HB2 LEU 2159 | 83.107 | 107.673 | 68.465 | 0.00 | 0.00 |
| ATOM 32334 | HB3 LEU 2159 | 82.493 | 108.825 | 67.230 | 0.00 | 0.00 |
| ATOM 32335 | CG LEU 2159  | 81.297 | 108.682 | 68.904 | 0.00 | 0.00 |
| ATOM 32336 | HG LEU 2159  | 80.757 | 107.927 | 69.476 | 0.00 | 0.00 |

|      |       |      |     |      |        |         |        |      |      |
|------|-------|------|-----|------|--------|---------|--------|------|------|
| ATOM | 32337 | CD1  | LEU | 2159 | 82.067 | 109.402 | 70.049 | 0.00 | 0.00 |
| ATOM | 32338 | 1HD1 | LEU | 2159 | 81.378 | 109.858 | 70.760 | 0.00 | 0.00 |
| ATOM | 32339 | 2HD1 | LEU | 2159 | 82.773 | 108.823 | 70.644 | 0.00 | 0.00 |
| ATOM | 32340 | 3HD1 | LEU | 2159 | 82.618 | 110.210 | 69.569 | 0.00 | 0.00 |
| ATOM | 32341 | CD2  | LEU | 2159 | 80.329 | 109.652 | 68.289 | 0.00 | 0.00 |
| ATOM | 32342 | 1HD2 | LEU | 2159 | 80.876 | 110.568 | 68.065 | 0.00 | 0.00 |
| ATOM | 32343 | 2HD2 | LEU | 2159 | 79.969 | 109.235 | 67.348 | 0.00 | 0.00 |
| ATOM | 32344 | 3HD2 | LEU | 2159 | 79.493 | 109.995 | 68.898 | 0.00 | 0.00 |
| ATOM | 32345 | C    | LEU | 2159 | 82.737 | 106.456 | 65.957 | 0.00 | 0.00 |
| ATOM | 32346 | O    | LEU | 2159 | 82.664 | 106.970 | 64.837 | 0.00 | 0.00 |
| ATOM | 32347 | N    | THR | 2160 | 83.674 | 105.542 | 66.231 | 0.00 | 0.00 |
| ATOM | 32348 | H    | THR | 2160 | 83.688 | 105.059 | 67.118 | 0.00 | 0.00 |
| ATOM | 32349 | CA   | THR | 2160 | 84.722 | 105.192 | 65.321 | 0.00 | 0.00 |
| ATOM | 32350 | HA   | THR | 2160 | 85.080 | 106.130 | 64.897 | 0.00 | 0.00 |
| ATOM | 32351 | CB   | THR | 2160 | 85.777 | 104.422 | 66.065 | 0.00 | 0.00 |
| ATOM | 32352 | HB   | THR | 2160 | 85.366 | 103.504 | 66.485 | 0.00 | 0.00 |
| ATOM | 32353 | CG2  | THR | 2160 | 86.882 | 103.913 | 65.172 | 0.00 | 0.00 |
| ATOM | 32354 | 1HG2 | THR | 2160 | 86.712 | 103.288 | 64.295 | 0.00 | 0.00 |
| ATOM | 32355 | 2HG2 | THR | 2160 | 87.277 | 104.856 | 64.794 | 0.00 | 0.00 |
| ATOM | 32356 | 3HG2 | THR | 2160 | 87.608 | 103.403 | 65.806 | 0.00 | 0.00 |
| ATOM | 32357 | OG1  | THR | 2160 | 86.405 | 105.176 | 67.134 | 0.00 | 0.00 |
| ATOM | 32358 | HG1  | THR | 2160 | 85.712 | 105.391 | 67.762 | 0.00 | 0.00 |
| ATOM | 32359 | C    | THR | 2160 | 84.133 | 104.466 | 64.026 | 0.00 | 0.00 |
| ATOM | 32360 | O    | THR | 2160 | 84.686 | 104.647 | 62.949 | 0.00 | 0.00 |
| ATOM | 32361 | N    | HID | 2161 | 83.066 | 103.708 | 64.217 | 0.00 | 0.00 |
| ATOM | 32362 | H    | HID | 2161 | 82.624 | 103.702 | 65.125 | 0.00 | 0.00 |



|      |       |     |     |      |        |         |        |      |      |
|------|-------|-----|-----|------|--------|---------|--------|------|------|
| ATOM | 32363 | CA  | HID | 2161 | 82.474 | 102.900 | 63.139 | 0.00 | 0.00 |
| ATOM | 32364 | HA  | HID | 2161 | 83.145 | 102.786 | 62.287 | 0.00 | 0.00 |
| ATOM | 32365 | CB  | HID | 2161 | 82.360 | 101.480 | 63.687 | 0.00 | 0.00 |
| ATOM | 32366 | HB2 | HID | 2161 | 81.859 | 101.507 | 64.654 | 0.00 | 0.00 |
| ATOM | 32367 | HB3 | HID | 2161 | 81.694 | 100.927 | 63.026 | 0.00 | 0.00 |
| ATOM | 32368 | CG  | HID | 2161 | 83.708 | 100.824 | 63.879 | 0.00 | 0.00 |
| ATOM | 32369 | ND1 | HID | 2161 | 84.470 | 100.828 | 65.049 | 0.00 | 0.00 |
| ATOM | 32370 | HD1 | HID | 2161 | 84.184 | 101.197 | 65.945 | 0.00 | 0.00 |
| ATOM | 32371 | CE1 | HID | 2161 | 85.708 | 100.470 | 64.747 | 0.00 | 0.00 |
| ATOM | 32372 | HE1 | HID | 2161 | 86.564 | 100.752 | 65.342 | 0.00 | 0.00 |
| ATOM | 32373 | NE2 | HID | 2161 | 85.824 | 100.250 | 63.427 | 0.00 | 0.00 |
| ATOM | 32374 | CD2 | HID | 2161 | 84.487 | 100.363 | 62.908 | 0.00 | 0.00 |
| ATOM | 32375 | HD2 | HID | 2161 | 84.270 | 100.417 | 61.852 | 0.00 | 0.00 |
| ATOM | 32376 | C   | HID | 2161 | 81.094 | 103.368 | 62.702 | 0.00 | 0.00 |
| ATOM | 32377 | O   | HID | 2161 | 80.417 | 102.810 | 61.841 | 0.00 | 0.00 |
| ATOM | 32378 | N   | GLY | 2162 | 80.767 | 104.581 | 63.243 | 0.00 | 0.00 |
| ATOM | 32379 | H   | GLY | 2162 | 81.422 | 104.980 | 63.901 | 0.00 | 0.00 |
| ATOM | 32380 | CA  | GLY | 2162 | 79.550 | 105.363 | 62.776 | 0.00 | 0.00 |
| ATOM | 32381 | HA2 | GLY | 2162 | 79.615 | 106.315 | 63.303 | 0.00 | 0.00 |
| ATOM | 32382 | HA3 | GLY | 2162 | 79.538 | 105.390 | 61.687 | 0.00 | 0.00 |
| ATOM | 32383 | C   | GLY | 2162 | 78.190 | 104.831 | 63.345 | 0.00 | 0.00 |
| ATOM | 32384 | O   | GLY | 2162 | 77.169 | 105.017 | 62.765 | 0.00 | 0.00 |
| ATOM | 32385 | N   | ILE | 2163 | 78.167 | 104.030 | 64.409 | 0.00 | 0.00 |
| ATOM | 32386 | H   | ILE | 2163 | 79.061 | 103.966 | 64.875 | 0.00 | 0.00 |
| ATOM | 32387 | CA  | ILE | 2163 | 77.031 | 103.312 | 64.989 | 0.00 | 0.00 |
| ATOM | 32388 | HA  | ILE | 2163 | 76.186 | 103.389 | 64.304 | 0.00 | 0.00 |

|      |       |      |     |      |        |         |        |      |      |
|------|-------|------|-----|------|--------|---------|--------|------|------|
| ATOM | 32389 | CB   | ILE | 2163 | 77.363 | 101.810 | 65.113 | 0.00 | 0.00 |
| ATOM | 32390 | HB   | ILE | 2163 | 76.442 | 101.306 | 65.406 | 0.00 | 0.00 |
| ATOM | 32391 | CG2  | ILE | 2163 | 77.767 | 101.236 | 63.723 | 0.00 | 0.00 |
| ATOM | 32392 | 1HG2 | ILE | 2163 | 76.920 | 101.268 | 63.038 | 0.00 | 0.00 |
| ATOM | 32393 | 2HG2 | ILE | 2163 | 78.703 | 101.704 | 63.418 | 0.00 | 0.00 |
| ATOM | 32394 | 3HG2 | ILE | 2163 | 77.896 | 100.154 | 63.687 | 0.00 | 0.00 |
| ATOM | 32395 | CG1  | ILE | 2163 | 78.489 | 101.583 | 66.084 | 0.00 | 0.00 |
| ATOM | 32396 | 2HG1 | ILE | 2163 | 79.322 | 102.253 | 65.868 | 0.00 | 0.00 |
| ATOM | 32397 | 3HG1 | ILE | 2163 | 78.193 | 101.878 | 67.091 | 0.00 | 0.00 |
| ATOM | 32398 | CD1  | ILE | 2163 | 79.053 | 100.127 | 66.177 | 0.00 | 0.00 |
| ATOM | 32399 | 1HD1 | ILE | 2163 | 79.713 | 99.953  | 67.027 | 0.00 | 0.00 |
| ATOM | 32400 | 2HD1 | ILE | 2163 | 78.256 | 99.391  | 66.286 | 0.00 | 0.00 |
| ATOM | 32401 | 3HD1 | ILE | 2163 | 79.632 | 99.975  | 65.266 | 0.00 | 0.00 |
| ATOM | 32402 | C    | ILE | 2163 | 76.523 | 103.977 | 66.293 | 0.00 | 0.00 |
| ATOM | 32403 | O    | ILE | 2163 | 75.589 | 103.533 | 66.940 | 0.00 | 0.00 |
| ATOM | 32404 | N    | ALA | 2164 | 76.999 | 105.188 | 66.677 | 0.00 | 0.00 |
| ATOM | 32405 | H    | ALA | 2164 | 77.428 | 105.736 | 65.946 | 0.00 | 0.00 |
| ATOM | 32406 | CA   | ALA | 2164 | 76.697 | 105.906 | 67.974 | 0.00 | 0.00 |
| ATOM | 32407 | HA   | ALA | 2164 | 76.758 | 105.191 | 68.794 | 0.00 | 0.00 |
| ATOM | 32408 | CB   | ALA | 2164 | 77.768 | 107.056 | 67.972 | 0.00 | 0.00 |
| ATOM | 32409 | HB1  | ALA | 2164 | 77.598 | 107.682 | 68.848 | 0.00 | 0.00 |
| ATOM | 32410 | HB2  | ALA | 2164 | 78.752 | 106.588 | 67.928 | 0.00 | 0.00 |
| ATOM | 32411 | HB3  | ALA | 2164 | 77.715 | 107.664 | 67.069 | 0.00 | 0.00 |
| ATOM | 32412 | C    | ALA | 2164 | 75.264 | 106.639 | 68.085 | 0.00 | 0.00 |
| ATOM | 32413 | O    | ALA | 2164 | 74.916 | 107.232 | 69.072 | 0.00 | 0.00 |
| ATOM | 32414 | N    | HIE | 2165 | 74.456 | 106.553 | 67.020 | 0.00 | 0.00 |

|      |       |     |     |      |        |         |        |      |      |
|------|-------|-----|-----|------|--------|---------|--------|------|------|
| ATOM | 32415 | H   | HIE | 2165 | 74.825 | 106.107 | 66.192 | 0.00 | 0.00 |
| ATOM | 32416 | CA  | HIE | 2165 | 73.043 | 106.946 | 67.041 | 0.00 | 0.00 |
| ATOM | 32417 | HA  | HIE | 2165 | 72.870 | 107.744 | 67.764 | 0.00 | 0.00 |
| ATOM | 32418 | CB  | HIE | 2165 | 72.634 | 107.544 | 65.660 | 0.00 | 0.00 |
| ATOM | 32419 | HB2 | HIE | 2165 | 71.608 | 107.896 | 65.769 | 0.00 | 0.00 |
| ATOM | 32420 | HB3 | HIE | 2165 | 73.203 | 108.462 | 65.512 | 0.00 | 0.00 |
| ATOM | 32421 | CG  | HIE | 2165 | 72.820 | 106.674 | 64.465 | 0.00 | 0.00 |
| ATOM | 32422 | ND1 | HIE | 2165 | 74.091 | 106.384 | 63.871 | 0.00 | 0.00 |
| ATOM | 32423 | CE1 | HIE | 2165 | 73.796 | 105.442 | 62.938 | 0.00 | 0.00 |
| ATOM | 32424 | HE1 | HIE | 2165 | 74.496 | 104.904 | 62.315 | 0.00 | 0.00 |
| ATOM | 32425 | NE2 | HIE | 2165 | 72.460 | 105.153 | 62.884 | 0.00 | 0.00 |
| ATOM | 32426 | HE2 | HIE | 2165 | 72.046 | 104.495 | 62.239 | 0.00 | 0.00 |
| ATOM | 32427 | CD2 | HIE | 2165 | 71.817 | 105.905 | 63.875 | 0.00 | 0.00 |
| ATOM | 32428 | HD2 | HIE | 2165 | 70.769 | 105.883 | 64.133 | 0.00 | 0.00 |
| ATOM | 32429 | C   | HIE | 2165 | 72.119 | 105.822 | 67.614 | 0.00 | 0.00 |
| ATOM | 32430 | O   | HIE | 2165 | 71.037 | 106.141 | 68.170 | 0.00 | 0.00 |
| ATOM | 32431 | N   | GLU | 2166 | 72.500 | 104.554 | 67.543 | 0.00 | 0.00 |
| ATOM | 32432 | H   | GLU | 2166 | 73.295 | 104.313 | 66.969 | 0.00 | 0.00 |
| ATOM | 32433 | CA  | GLU | 2166 | 71.695 | 103.513 | 68.105 | 0.00 | 0.00 |
| ATOM | 32434 | HA  | GLU | 2166 | 70.708 | 103.921 | 68.323 | 0.00 | 0.00 |
| ATOM | 32435 | CB  | GLU | 2166 | 71.459 | 102.265 | 67.256 | 0.00 | 0.00 |
| ATOM | 32436 | HB2 | GLU | 2166 | 72.314 | 101.600 | 67.379 | 0.00 | 0.00 |
| ATOM | 32437 | HB3 | GLU | 2166 | 70.542 | 101.883 | 67.703 | 0.00 | 0.00 |
| ATOM | 32438 | CG  | GLU | 2166 | 71.390 | 102.508 | 65.730 | 0.00 | 0.00 |
| ATOM | 32439 | HG2 | GLU | 2166 | 72.190 | 103.209 | 65.491 | 0.00 | 0.00 |
| ATOM | 32440 | HG3 | GLU | 2166 | 71.577 | 101.562 | 65.222 | 0.00 | 0.00 |

|      |       |      |     |      |        |         |        |      |      |
|------|-------|------|-----|------|--------|---------|--------|------|------|
| ATOM | 32441 | CD   | GLU | 2166 | 70.069 | 103.183 | 65.264 | 0.00 | 0.00 |
| ATOM | 32442 | OE1  | GLU | 2166 | 69.638 | 102.926 | 64.106 | 0.00 | 0.00 |
| ATOM | 32443 | OE2  | GLU | 2166 | 69.327 | 103.845 | 66.053 | 0.00 | 0.00 |
| ATOM | 32444 | C    | GLU | 2166 | 72.211 | 103.075 | 69.423 | 0.00 | 0.00 |
| ATOM | 32445 | O    | GLU | 2166 | 71.428 | 102.712 | 70.266 | 0.00 | 0.00 |
| ATOM | 32446 | N    | VAL | 2167 | 73.549 | 103.156 | 69.668 | 0.00 | 0.00 |
| ATOM | 32447 | H    | VAL | 2167 | 74.151 | 103.349 | 68.880 | 0.00 | 0.00 |
| ATOM | 32448 | CA   | VAL | 2167 | 74.125 | 102.417 | 70.864 | 0.00 | 0.00 |
| ATOM | 32449 | HA   | VAL | 2167 | 73.342 | 102.381 | 71.622 | 0.00 | 0.00 |
| ATOM | 32450 | CB   | VAL | 2167 | 74.495 | 100.994 | 70.497 | 0.00 | 0.00 |
| ATOM | 32451 | HB   | VAL | 2167 | 75.115 | 100.561 | 71.282 | 0.00 | 0.00 |
| ATOM | 32452 | CG1  | VAL | 2167 | 73.257 | 100.030 | 70.399 | 0.00 | 0.00 |
| ATOM | 32453 | 1HG1 | VAL | 2167 | 72.897 | 100.015 | 71.428 | 0.00 | 0.00 |
| ATOM | 32454 | 2HG1 | VAL | 2167 | 72.412 | 100.377 | 69.804 | 0.00 | 0.00 |
| ATOM | 32455 | 3HG1 | VAL | 2167 | 73.511 | 98.995  | 70.171 | 0.00 | 0.00 |
| ATOM | 32456 | CG2  | VAL | 2167 | 75.306 | 100.885 | 69.230 | 0.00 | 0.00 |
| ATOM | 32457 | 1HG2 | VAL | 2167 | 75.703 | 99.870  | 69.250 | 0.00 | 0.00 |
| ATOM | 32458 | 2HG2 | VAL | 2167 | 74.668 | 101.014 | 68.356 | 0.00 | 0.00 |
| ATOM | 32459 | 3HG2 | VAL | 2167 | 76.080 | 101.648 | 69.322 | 0.00 | 0.00 |
| ATOM | 32460 | C    | VAL | 2167 | 75.317 | 103.235 | 71.405 | 0.00 | 0.00 |
| ATOM | 32461 | O    | VAL | 2167 | 75.716 | 104.327 | 70.875 | 0.00 | 0.00 |
| ATOM | 32462 | N    | GLY | 2168 | 75.937 | 102.672 | 72.447 | 0.00 | 0.00 |
| ATOM | 32463 | H    | GLY | 2168 | 75.483 | 101.830 | 72.771 | 0.00 | 0.00 |
| ATOM | 32464 | CA   | GLY | 2168 | 77.255 | 103.099 | 72.935 | 0.00 | 0.00 |
| ATOM | 32465 | HA2  | GLY | 2168 | 77.791 | 102.157 | 73.049 | 0.00 | 0.00 |
| ATOM | 32466 | HA3  | GLY | 2168 | 77.852 | 103.665 | 72.221 | 0.00 | 0.00 |

|      |       |      |     |      |        |         |        |      |      |
|------|-------|------|-----|------|--------|---------|--------|------|------|
| ATOM | 32467 | C    | GLY | 2168 | 77.163 | 103.751 | 74.293 | 0.00 | 0.00 |
| ATOM | 32468 | O    | GLY | 2168 | 78.213 | 103.966 | 74.966 | 0.00 | 0.00 |
| ATOM | 32469 | N    | SER | 2169 | 75.961 | 103.995 | 74.775 | 0.00 | 0.00 |
| ATOM | 32470 | H    | SER | 2169 | 75.157 | 103.838 | 74.184 | 0.00 | 0.00 |
| ATOM | 32471 | CA   | SER | 2169 | 75.665 | 104.660 | 76.114 | 0.00 | 0.00 |
| ATOM | 32472 | HA   | SER | 2169 | 76.238 | 104.207 | 76.923 | 0.00 | 0.00 |
| ATOM | 32473 | CB   | SER | 2169 | 76.105 | 106.180 | 75.976 | 0.00 | 0.00 |
| ATOM | 32474 | HB2  | SER | 2169 | 75.865 | 106.859 | 76.794 | 0.00 | 0.00 |
| ATOM | 32475 | HB3  | SER | 2169 | 77.177 | 106.258 | 75.795 | 0.00 | 0.00 |
| ATOM | 32476 | OG   | SER | 2169 | 75.331 | 106.615 | 74.885 | 0.00 | 0.00 |
| ATOM | 32477 | HG   | SER | 2169 | 75.505 | 107.554 | 74.983 | 0.00 | 0.00 |
| ATOM | 32478 | C    | SER | 2169 | 74.237 | 104.708 | 76.636 | 0.00 | 0.00 |
| ATOM | 32479 | O    | SER | 2169 | 73.226 | 104.428 | 75.979 | 0.00 | 0.00 |
| ATOM | 32480 | N    | ILE | 2170 | 74.121 | 105.016 | 77.935 | 0.00 | 0.00 |
| ATOM | 32481 | H    | ILE | 2170 | 74.927 | 105.272 | 78.487 | 0.00 | 0.00 |
| ATOM | 32482 | CA   | ILE | 2170 | 72.742 | 105.072 | 78.639 | 0.00 | 0.00 |
| ATOM | 32483 | HA   | ILE | 2170 | 72.079 | 104.428 | 78.061 | 0.00 | 0.00 |
| ATOM | 32484 | CB   | ILE | 2170 | 72.929 | 104.610 | 80.130 | 0.00 | 0.00 |
| ATOM | 32485 | HB   | ILE | 2170 | 73.598 | 105.176 | 80.779 | 0.00 | 0.00 |
| ATOM | 32486 | CG2  | ILE | 2170 | 71.522 | 104.429 | 80.775 | 0.00 | 0.00 |
| ATOM | 32487 | 1HG2 | ILE | 2170 | 70.928 | 105.338 | 80.681 | 0.00 | 0.00 |
| ATOM | 32488 | 2HG2 | ILE | 2170 | 71.029 | 103.537 | 80.389 | 0.00 | 0.00 |
| ATOM | 32489 | 3HG2 | ILE | 2170 | 71.543 | 104.244 | 81.849 | 0.00 | 0.00 |
| ATOM | 32490 | CG1  | ILE | 2170 | 73.465 | 103.118 | 80.052 | 0.00 | 0.00 |
| ATOM | 32491 | 2HG1 | ILE | 2170 | 72.792 | 102.429 | 79.542 | 0.00 | 0.00 |
| ATOM | 32492 | 3HG1 | ILE | 2170 | 74.424 | 103.133 | 79.535 | 0.00 | 0.00 |

|      |       |      |     |      |        |         |        |      |      |
|------|-------|------|-----|------|--------|---------|--------|------|------|
| ATOM | 32493 | CD1  | ILE | 2170 | 73.882 | 102.700 | 81.506 | 0.00 | 0.00 |
| ATOM | 32494 | 1HD1 | ILE | 2170 | 74.302 | 101.694 | 81.506 | 0.00 | 0.00 |
| ATOM | 32495 | 2HD1 | ILE | 2170 | 74.692 | 103.288 | 81.938 | 0.00 | 0.00 |
| ATOM | 32496 | 3HD1 | ILE | 2170 | 73.088 | 102.555 | 82.239 | 0.00 | 0.00 |
| ATOM | 32497 | C    | ILE | 2170 | 72.129 | 106.446 | 78.375 | 0.00 | 0.00 |
| ATOM | 32498 | O    | ILE | 2170 | 72.169 | 107.327 | 79.270 | 0.00 | 0.00 |
| ATOM | 32499 | N    | GLU | 2171 | 71.675 | 106.598 | 77.171 | 0.00 | 0.00 |
| ATOM | 32500 | H    | GLU | 2171 | 71.981 | 105.897 | 76.511 | 0.00 | 0.00 |
| ATOM | 32501 | CA   | GLU | 2171 | 71.085 | 107.829 | 76.582 | 0.00 | 0.00 |
| ATOM | 32502 | HA   | GLU | 2171 | 70.799 | 108.490 | 77.401 | 0.00 | 0.00 |
| ATOM | 32503 | CB   | GLU | 2171 | 72.178 | 108.533 | 75.693 | 0.00 | 0.00 |
| ATOM | 32504 | HB2  | GLU | 2171 | 72.602 | 107.867 | 74.941 | 0.00 | 0.00 |
| ATOM | 32505 | HB3  | GLU | 2171 | 71.622 | 109.313 | 75.172 | 0.00 | 0.00 |
| ATOM | 32506 | CG   | GLU | 2171 | 73.302 | 109.058 | 76.560 | 0.00 | 0.00 |
| ATOM | 32507 | HG2  | GLU | 2171 | 72.859 | 109.689 | 77.331 | 0.00 | 0.00 |
| ATOM | 32508 | HG3  | GLU | 2171 | 73.856 | 108.222 | 76.987 | 0.00 | 0.00 |
| ATOM | 32509 | CD   | GLU | 2171 | 74.369 | 109.775 | 75.761 | 0.00 | 0.00 |
| ATOM | 32510 | OE1  | GLU | 2171 | 74.070 | 110.940 | 75.382 | 0.00 | 0.00 |
| ATOM | 32511 | OE2  | GLU | 2171 | 75.497 | 109.204 | 75.373 | 0.00 | 0.00 |
| ATOM | 32512 | C    | GLU | 2171 | 69.743 | 107.619 | 75.926 | 0.00 | 0.00 |
| ATOM | 32513 | O    | GLU | 2171 | 69.506 | 106.628 | 75.329 | 0.00 | 0.00 |
| ATOM | 32514 | N    | VAL | 2172 | 68.762 | 108.530 | 76.086 | 0.00 | 0.00 |
| ATOM | 32515 | H    | VAL | 2172 | 68.984 | 109.396 | 76.555 | 0.00 | 0.00 |
| ATOM | 32516 | CA   | VAL | 2172 | 67.418 | 108.351 | 75.554 | 0.00 | 0.00 |
| ATOM | 32517 | HA   | VAL | 2172 | 67.167 | 107.320 | 75.801 | 0.00 | 0.00 |
| ATOM | 32518 | CB   | VAL | 2172 | 66.358 | 109.235 | 76.109 | 0.00 | 0.00 |

|      |       |      |     |      |        |         |        |      |      |
|------|-------|------|-----|------|--------|---------|--------|------|------|
| ATOM | 32519 | HB   | VAL | 2172 | 65.472 | 108.954 | 75.540 | 0.00 | 0.00 |
| ATOM | 32520 | CG1  | VAL | 2172 | 66.085 | 108.952 | 77.585 | 0.00 | 0.00 |
| ATOM | 32521 | 1HG1 | VAL | 2172 | 67.094 | 109.020 | 77.993 | 0.00 | 0.00 |
| ATOM | 32522 | 2HG1 | VAL | 2172 | 65.384 | 109.659 | 78.028 | 0.00 | 0.00 |
| ATOM | 32523 | 3HG1 | VAL | 2172 | 65.710 | 107.949 | 77.788 | 0.00 | 0.00 |
| ATOM | 32524 | CG2  | VAL | 2172 | 66.653 | 110.718 | 75.845 | 0.00 | 0.00 |
| ATOM | 32525 | 1HG2 | VAL | 2172 | 65.929 | 111.307 | 76.408 | 0.00 | 0.00 |
| ATOM | 32526 | 2HG2 | VAL | 2172 | 67.671 | 110.978 | 76.135 | 0.00 | 0.00 |
| ATOM | 32527 | 3HG2 | VAL | 2172 | 66.552 | 110.891 | 74.774 | 0.00 | 0.00 |
| ATOM | 32528 | C    | VAL | 2172 | 67.483 | 108.588 | 74.067 | 0.00 | 0.00 |
| ATOM | 32529 | O    | VAL | 2172 | 68.265 | 109.364 | 73.471 | 0.00 | 0.00 |
| ATOM | 32530 | N    | GLY | 2173 | 66.658 | 107.809 | 73.402 | 0.00 | 0.00 |
| ATOM | 32531 | H    | GLY | 2173 | 65.973 | 107.347 | 73.983 | 0.00 | 0.00 |
| ATOM | 32532 | CA   | GLY | 2173 | 66.640 | 107.577 | 71.922 | 0.00 | 0.00 |
| ATOM | 32533 | HA2  | GLY | 2173 | 65.588 | 107.531 | 71.639 | 0.00 | 0.00 |
| ATOM | 32534 | HA3  | GLY | 2173 | 66.988 | 108.507 | 71.473 | 0.00 | 0.00 |
| ATOM | 32535 | C    | GLY | 2173 | 67.491 | 106.389 | 71.459 | 0.00 | 0.00 |
| ATOM | 32536 | O    | GLY | 2173 | 67.234 | 105.893 | 70.331 | 0.00 | 0.00 |
| ATOM | 32537 | N    | LYS | 2174 | 68.303 | 105.783 | 72.323 | 0.00 | 0.00 |
| ATOM | 32538 | H    | LYS | 2174 | 68.489 | 106.212 | 73.218 | 0.00 | 0.00 |
| ATOM | 32539 | CA   | LYS | 2174 | 69.156 | 104.628 | 72.084 | 0.00 | 0.00 |
| ATOM | 32540 | HA   | LYS | 2174 | 69.514 | 104.573 | 71.056 | 0.00 | 0.00 |
| ATOM | 32541 | CB   | LYS | 2174 | 70.507 | 104.875 | 72.757 | 0.00 | 0.00 |
| ATOM | 32542 | HB2  | LYS | 2174 | 70.284 | 105.106 | 73.798 | 0.00 | 0.00 |
| ATOM | 32543 | HB3  | LYS | 2174 | 70.928 | 103.872 | 72.688 | 0.00 | 0.00 |
| ATOM | 32544 | CG   | LYS | 2174 | 71.382 | 105.978 | 72.150 | 0.00 | 0.00 |

|      |       |      |     |      |        |         |        |      |      |
|------|-------|------|-----|------|--------|---------|--------|------|------|
| ATOM | 32545 | HG2  | LYS | 2174 | 71.303 | 105.931 | 71.064 | 0.00 | 0.00 |
| ATOM | 32546 | HG3  | LYS | 2174 | 71.025 | 106.867 | 72.669 | 0.00 | 0.00 |
| ATOM | 32547 | CD   | LYS | 2174 | 72.793 | 105.871 | 72.519 | 0.00 | 0.00 |
| ATOM | 32548 | HD2  | LYS | 2174 | 72.892 | 105.974 | 73.599 | 0.00 | 0.00 |
| ATOM | 32549 | HD3  | LYS | 2174 | 73.092 | 104.878 | 72.185 | 0.00 | 0.00 |
| ATOM | 32550 | CE   | LYS | 2174 | 73.533 | 107.007 | 71.915 | 0.00 | 0.00 |
| ATOM | 32551 | HE2  | LYS | 2174 | 73.350 | 107.058 | 70.841 | 0.00 | 0.00 |
| ATOM | 32552 | HE3  | LYS | 2174 | 73.299 | 107.969 | 72.372 | 0.00 | 0.00 |
| ATOM | 32553 | NZ   | LYS | 2174 | 75.026 | 106.771 | 72.049 | 0.00 | 0.00 |
| ATOM | 32554 | HZ1  | LYS | 2174 | 75.241 | 106.011 | 71.419 | 0.00 | 0.00 |
| ATOM | 32555 | HZ2  | LYS | 2174 | 75.506 | 107.618 | 71.779 | 0.00 | 0.00 |
| ATOM | 32556 | HZ3  | LYS | 2174 | 75.236 | 106.571 | 73.016 | 0.00 | 0.00 |
| ATOM | 32557 | C    | LYS | 2174 | 68.546 | 103.283 | 72.311 | 0.00 | 0.00 |
| ATOM | 32558 | O    | LYS | 2174 | 67.536 | 103.156 | 73.042 | 0.00 | 0.00 |
| ATOM | 32559 | N    | LEU | 2175 | 69.228 | 102.238 | 71.793 | 0.00 | 0.00 |
| ATOM | 32560 | H    | LEU | 2175 | 70.004 | 102.210 | 71.147 | 0.00 | 0.00 |
| ATOM | 32561 | CA   | LEU | 2175 | 68.873 | 100.813 | 72.046 | 0.00 | 0.00 |
| ATOM | 32562 | HA   | LEU | 2175 | 67.853 | 100.697 | 71.681 | 0.00 | 0.00 |
| ATOM | 32563 | CB   | LEU | 2175 | 69.576 | 99.932  | 70.962 | 0.00 | 0.00 |
| ATOM | 32564 | HB2  | LEU | 2175 | 69.316 | 100.287 | 69.965 | 0.00 | 0.00 |
| ATOM | 32565 | HB3  | LEU | 2175 | 70.645 | 99.945  | 71.178 | 0.00 | 0.00 |
| ATOM | 32566 | CG   | LEU | 2175 | 69.004 | 98.489  | 70.996 | 0.00 | 0.00 |
| ATOM | 32567 | HG   | LEU | 2175 | 68.751 | 98.188  | 72.013 | 0.00 | 0.00 |
| ATOM | 32568 | CD1  | LEU | 2175 | 67.759 | 98.337  | 70.085 | 0.00 | 0.00 |
| ATOM | 32569 | 1HD1 | LEU | 2175 | 66.927 | 98.951  | 70.428 | 0.00 | 0.00 |
| ATOM | 32570 | 2HD1 | LEU | 2175 | 68.040 | 98.470  | 69.040 | 0.00 | 0.00 |



|      |       |      |     |      |        |         |        |      |      |
|------|-------|------|-----|------|--------|---------|--------|------|------|
| ATOM | 32571 | 3HD1 | LEU | 2175 | 67.334 | 97.340  | 70.202 | 0.00 | 0.00 |
| ATOM | 32572 | CD2  | LEU | 2175 | 70.090 | 97.689  | 70.321 | 0.00 | 0.00 |
| ATOM | 32573 | 1HD2 | LEU | 2175 | 69.701 | 96.696  | 70.099 | 0.00 | 0.00 |
| ATOM | 32574 | 2HD2 | LEU | 2175 | 70.505 | 98.135  | 69.417 | 0.00 | 0.00 |
| ATOM | 32575 | 3HD2 | LEU | 2175 | 70.873 | 97.482  | 71.050 | 0.00 | 0.00 |
| ATOM | 32576 | C    | LEU | 2175 | 69.111 | 100.366 | 73.542 | 0.00 | 0.00 |
| ATOM | 32577 | O    | LEU | 2175 | 70.165 | 100.766 | 74.081 | 0.00 | 0.00 |
| ATOM | 32578 | N    | ALA | 2176 | 68.109 | 99.717  | 74.163 | 0.00 | 0.00 |
| ATOM | 32579 | H    | ALA | 2176 | 67.269 | 99.519  | 73.639 | 0.00 | 0.00 |
| ATOM | 32580 | CA   | ALA | 2176 | 68.263 | 99.096  | 75.456 | 0.00 | 0.00 |
| ATOM | 32581 | HA   | ALA | 2176 | 68.840 | 99.730  | 76.129 | 0.00 | 0.00 |
| ATOM | 32582 | CB   | ALA | 2176 | 66.905 | 98.804  | 76.050 | 0.00 | 0.00 |
| ATOM | 32583 | HB1  | ALA | 2176 | 66.996 | 98.495  | 77.091 | 0.00 | 0.00 |
| ATOM | 32584 | HB2  | ALA | 2176 | 66.237 | 99.636  | 75.828 | 0.00 | 0.00 |
| ATOM | 32585 | HB3  | ALA | 2176 | 66.525 | 97.919  | 75.539 | 0.00 | 0.00 |
| ATOM | 32586 | C    | ALA | 2176 | 69.187 | 97.885  | 75.441 | 0.00 | 0.00 |
| ATOM | 32587 | O    | ALA | 2176 | 68.718 | 96.775  | 75.748 | 0.00 | 0.00 |
| ATOM | 32588 | N    | ASP | 2177 | 70.492 | 98.033  | 75.123 | 0.00 | 0.00 |
| ATOM | 32589 | H    | ASP | 2177 | 70.883 | 98.917  | 74.831 | 0.00 | 0.00 |
| ATOM | 32590 | CA   | ASP | 2177 | 71.562 | 97.025  | 75.430 | 0.00 | 0.00 |
| ATOM | 32591 | HA   | ASP | 2177 | 71.090 | 96.051  | 75.553 | 0.00 | 0.00 |
| ATOM | 32592 | CB   | ASP | 2177 | 72.590 | 96.763  | 74.403 | 0.00 | 0.00 |
| ATOM | 32593 | HB2  | ASP | 2177 | 72.925 | 97.692  | 73.942 | 0.00 | 0.00 |
| ATOM | 32594 | HB3  | ASP | 2177 | 73.446 | 96.231  | 74.818 | 0.00 | 0.00 |
| ATOM | 32595 | CG   | ASP | 2177 | 72.177 | 95.860  | 73.203 | 0.00 | 0.00 |
| ATOM | 32596 | OD1  | ASP | 2177 | 71.041 | 95.480  | 72.928 | 0.00 | 0.00 |

|      |       |      |     |      |        |         |        |      |      |
|------|-------|------|-----|------|--------|---------|--------|------|------|
| ATOM | 32597 | OD2  | ASP | 2177 | 73.146 | 95.499  | 72.515 | 0.00 | 0.00 |
| ATOM | 32598 | C    | ASP | 2177 | 72.262 | 97.321  | 76.752 | 0.00 | 0.00 |
| ATOM | 32599 | O    | ASP | 2177 | 72.965 | 98.346  | 76.823 | 0.00 | 0.00 |
| ATOM | 32600 | N    | LEU | 2178 | 72.113 | 96.492  | 77.765 | 0.00 | 0.00 |
| ATOM | 32601 | H    | LEU | 2178 | 71.700 | 95.580  | 77.631 | 0.00 | 0.00 |
| ATOM | 32602 | CA   | LEU | 2178 | 72.405 | 96.842  | 79.131 | 0.00 | 0.00 |
| ATOM | 32603 | HA   | LEU | 2178 | 73.198 | 97.587  | 79.206 | 0.00 | 0.00 |
| ATOM | 32604 | CB   | LEU | 2178 | 71.180 | 97.378  | 79.766 | 0.00 | 0.00 |
| ATOM | 32605 | HB2  | LEU | 2178 | 70.365 | 96.657  | 79.715 | 0.00 | 0.00 |
| ATOM | 32606 | HB3  | LEU | 2178 | 71.328 | 97.491  | 80.840 | 0.00 | 0.00 |
| ATOM | 32607 | CG   | LEU | 2178 | 70.559 | 98.785  | 79.378 | 0.00 | 0.00 |
| ATOM | 32608 | HG   | LEU | 2178 | 70.454 | 98.777  | 78.293 | 0.00 | 0.00 |
| ATOM | 32609 | CD1  | LEU | 2178 | 69.189 | 99.047  | 79.988 | 0.00 | 0.00 |
| ATOM | 32610 | 1HD1 | LEU | 2178 | 68.853 | 100.052 | 79.731 | 0.00 | 0.00 |
| ATOM | 32611 | 2HD1 | LEU | 2178 | 68.397 | 98.363  | 79.683 | 0.00 | 0.00 |
| ATOM | 32612 | 3HD1 | LEU | 2178 | 69.316 | 98.892  | 81.059 | 0.00 | 0.00 |
| ATOM | 32613 | CD2  | LEU | 2178 | 71.544 | 99.957  | 79.698 | 0.00 | 0.00 |
| ATOM | 32614 | 1HD2 | LEU | 2178 | 71.926 | 100.158 | 80.699 | 0.00 | 0.00 |
| ATOM | 32615 | 2HD2 | LEU | 2178 | 72.431 | 99.836  | 79.076 | 0.00 | 0.00 |
| ATOM | 32616 | 3HD2 | LEU | 2178 | 71.006 | 100.847 | 79.371 | 0.00 | 0.00 |
| ATOM | 32617 | C    | LEU | 2178 | 72.940 | 95.681  | 79.930 | 0.00 | 0.00 |
| ATOM | 32618 | O    | LEU | 2178 | 72.313 | 94.612  | 79.681 | 0.00 | 0.00 |
| ATOM | 32619 | N    | VAL | 2179 | 73.876 | 95.966  | 80.822 | 0.00 | 0.00 |
| ATOM | 32620 | H    | VAL | 2179 | 74.338 | 96.860  | 80.737 | 0.00 | 0.00 |
| ATOM | 32621 | CA   | VAL | 2179 | 74.616 | 94.899  | 81.649 | 0.00 | 0.00 |
| ATOM | 32622 | HA   | VAL | 2179 | 74.109 | 93.936  | 81.594 | 0.00 | 0.00 |

|            |               |        |        |        |      |      |
|------------|---------------|--------|--------|--------|------|------|
| ATOM 32623 | CB VAL 2179   | 76.016 | 94.506 | 81.151 | 0.00 | 0.00 |
| ATOM 32624 | HB VAL 2179   | 76.726 | 95.301 | 81.377 | 0.00 | 0.00 |
| ATOM 32625 | CG1 VAL 2179  | 76.527 | 93.326 | 82.002 | 0.00 | 0.00 |
| ATOM 32626 | 1HG1 VAL 2179 | 77.596 | 93.262 | 81.800 | 0.00 | 0.00 |
| ATOM 32627 | 2HG1 VAL 2179 | 76.453 | 93.512 | 83.073 | 0.00 | 0.00 |
| ATOM 32628 | 3HG1 VAL 2179 | 76.178 | 92.333 | 81.719 | 0.00 | 0.00 |
| ATOM 32629 | CG2 VAL 2179  | 75.955 | 94.327 | 79.633 | 0.00 | 0.00 |
| ATOM 32630 | 1HG2 VAL 2179 | 76.957 | 94.022 | 79.331 | 0.00 | 0.00 |
| ATOM 32631 | 2HG2 VAL 2179 | 75.137 | 93.655 | 79.373 | 0.00 | 0.00 |
| ATOM 32632 | 3HG2 VAL 2179 | 75.635 | 95.211 | 79.082 | 0.00 | 0.00 |
| ATOM 32633 | C VAL 2179    | 74.591 | 95.392 | 83.091 | 0.00 | 0.00 |
| ATOM 32634 | O VAL 2179    | 74.755 | 96.586 | 83.373 | 0.00 | 0.00 |
| ATOM 32635 | N VAL 2180    | 74.137 | 94.573 | 84.022 | 0.00 | 0.00 |
| ATOM 32636 | H VAL 2180    | 73.905 | 93.626 | 83.757 | 0.00 | 0.00 |
| ATOM 32637 | CA VAL 2180   | 74.102 | 94.843 | 85.480 | 0.00 | 0.00 |
| ATOM 32638 | HA VAL 2180   | 74.424 | 95.884 | 85.522 | 0.00 | 0.00 |
| ATOM 32639 | CB VAL 2180   | 72.688 | 94.588 | 86.059 | 0.00 | 0.00 |
| ATOM 32640 | HB VAL 2180   | 72.376 | 93.560 | 85.877 | 0.00 | 0.00 |
| ATOM 32641 | CG1 VAL 2180  | 72.734 | 94.750 | 87.629 | 0.00 | 0.00 |
| ATOM 32642 | 1HG1 VAL 2180 | 73.378 | 93.962 | 88.019 | 0.00 | 0.00 |
| ATOM 32643 | 2HG1 VAL 2180 | 73.057 | 95.754 | 87.904 | 0.00 | 0.00 |
| ATOM 32644 | 3HG1 VAL 2180 | 71.751 | 94.702 | 88.097 | 0.00 | 0.00 |
| ATOM 32645 | CG2 VAL 2180  | 71.693 | 95.651 | 85.500 | 0.00 | 0.00 |
| ATOM 32646 | 1HG2 VAL 2180 | 70.949 | 95.882 | 86.263 | 0.00 | 0.00 |
| ATOM 32647 | 2HG2 VAL 2180 | 72.324 | 96.533 | 85.398 | 0.00 | 0.00 |
| ATOM 32648 | 3HG2 VAL 2180 | 71.271 | 95.284 | 84.564 | 0.00 | 0.00 |

|      |       |     |     |      |        |        |        |      |      |
|------|-------|-----|-----|------|--------|--------|--------|------|------|
| ATOM | 32649 | C   | VAL | 2180 | 75.187 | 94.056 | 86.313 | 0.00 | 0.00 |
| ATOM | 32650 | O   | VAL | 2180 | 75.390 | 92.875 | 86.008 | 0.00 | 0.00 |
| ATOM | 32651 | N   | TRP | 2181 | 75.765 | 94.723 | 87.332 | 0.00 | 0.00 |
| ATOM | 32652 | H   | TRP | 2181 | 75.497 | 95.691 | 87.439 | 0.00 | 0.00 |
| ATOM | 32653 | CA  | TRP | 2181 | 76.845 | 94.192 | 88.200 | 0.00 | 0.00 |
| ATOM | 32654 | HA  | TRP | 2181 | 76.841 | 93.106 | 88.114 | 0.00 | 0.00 |
| ATOM | 32655 | CB  | TRP | 2181 | 78.241 | 94.865 | 87.737 | 0.00 | 0.00 |
| ATOM | 32656 | HB2 | TRP | 2181 | 78.347 | 95.833 | 88.227 | 0.00 | 0.00 |
| ATOM | 32657 | HB3 | TRP | 2181 | 79.035 | 94.282 | 88.205 | 0.00 | 0.00 |
| ATOM | 32658 | CG  | TRP | 2181 | 78.571 | 94.975 | 86.262 | 0.00 | 0.00 |
| ATOM | 32659 | CD1 | TRP | 2181 | 78.180 | 96.097 | 85.556 | 0.00 | 0.00 |
| ATOM | 32660 | HD1 | TRP | 2181 | 77.575 | 96.928 | 85.886 | 0.00 | 0.00 |
| ATOM | 32661 | NE1 | TRP | 2181 | 78.715 | 95.918 | 84.295 | 0.00 | 0.00 |
| ATOM | 32662 | HE1 | TRP | 2181 | 78.572 | 96.585 | 83.551 | 0.00 | 0.00 |
| ATOM | 32663 | CE2 | TRP | 2181 | 79.570 | 94.839 | 84.228 | 0.00 | 0.00 |
| ATOM | 32664 | CZ2 | TRP | 2181 | 80.400 | 94.260 | 83.219 | 0.00 | 0.00 |
| ATOM | 32665 | HZ2 | TRP | 2181 | 80.481 | 94.754 | 82.262 | 0.00 | 0.00 |
| ATOM | 32666 | CH2 | TRP | 2181 | 81.030 | 93.014 | 83.475 | 0.00 | 0.00 |
| ATOM | 32667 | HH2 | TRP | 2181 | 81.737 | 92.528 | 82.820 | 0.00 | 0.00 |
| ATOM | 32668 | CZ3 | TRP | 2181 | 80.871 | 92.436 | 84.741 | 0.00 | 0.00 |
| ATOM | 32669 | HZ3 | TRP | 2181 | 81.341 | 91.491 | 84.970 | 0.00 | 0.00 |
| ATOM | 32670 | CE3 | TRP | 2181 | 79.996 | 92.943 | 85.678 | 0.00 | 0.00 |
| ATOM | 32671 | HE3 | TRP | 2181 | 79.759 | 92.429 | 86.597 | 0.00 | 0.00 |
| ATOM | 32672 | CD2 | TRP | 2181 | 79.402 | 94.174 | 85.488 | 0.00 | 0.00 |
| ATOM | 32673 | C   | TRP | 2181 | 76.644 | 94.575 | 89.666 | 0.00 | 0.00 |
| ATOM | 32674 | O   | TRP | 2181 | 76.345 | 95.719 | 90.028 | 0.00 | 0.00 |

|      |       |     |     |      |        |        |        |      |      |
|------|-------|-----|-----|------|--------|--------|--------|------|------|
| ATOM | 32675 | N   | SER | 2182 | 76.849 | 93.628 | 90.543 | 0.00 | 0.00 |
| ATOM | 32676 | H   | SER | 2182 | 76.996 | 92.705 | 90.162 | 0.00 | 0.00 |
| ATOM | 32677 | CA  | SER | 2182 | 77.063 | 93.893 | 91.990 | 0.00 | 0.00 |
| ATOM | 32678 | HA  | SER | 2182 | 76.285 | 94.581 | 92.322 | 0.00 | 0.00 |
| ATOM | 32679 | CB  | SER | 2182 | 76.988 | 92.701 | 92.979 | 0.00 | 0.00 |
| ATOM | 32680 | HB2 | SER | 2182 | 78.026 | 92.382 | 93.069 | 0.00 | 0.00 |
| ATOM | 32681 | HB3 | SER | 2182 | 76.618 | 93.050 | 93.943 | 0.00 | 0.00 |
| ATOM | 32682 | OG  | SER | 2182 | 76.091 | 91.763 | 92.493 | 0.00 | 0.00 |
| ATOM | 32683 | HG  | SER | 2182 | 75.319 | 91.681 | 93.057 | 0.00 | 0.00 |
| ATOM | 32684 | C   | SER | 2182 | 78.443 | 94.548 | 92.201 | 0.00 | 0.00 |
| ATOM | 32685 | O   | SER | 2182 | 79.419 | 94.112 | 91.576 | 0.00 | 0.00 |
| ATOM | 32686 | N   | PRO | 2183 | 78.622 | 95.546 | 93.078 | 0.00 | 0.00 |
| ATOM | 32687 | CD  | PRO | 2183 | 77.523 | 96.240 | 93.768 | 0.00 | 0.00 |
| ATOM | 32688 | HD2 | PRO | 2183 | 77.123 | 95.507 | 94.468 | 0.00 | 0.00 |
| ATOM | 32689 | HD3 | PRO | 2183 | 76.827 | 96.654 | 93.038 | 0.00 | 0.00 |
| ATOM | 32690 | CG  | PRO | 2183 | 78.113 | 97.404 | 94.553 | 0.00 | 0.00 |
| ATOM | 32691 | HG2 | PRO | 2183 | 77.820 | 98.269 | 93.958 | 0.00 | 0.00 |
| ATOM | 32692 | HG3 | PRO | 2183 | 77.696 | 97.511 | 95.554 | 0.00 | 0.00 |
| ATOM | 32693 | CB  | PRO | 2183 | 79.583 | 96.977 | 94.581 | 0.00 | 0.00 |
| ATOM | 32694 | HB2 | PRO | 2183 | 80.275 | 97.818 | 94.627 | 0.00 | 0.00 |
| ATOM | 32695 | HB3 | PRO | 2183 | 79.716 | 96.243 | 95.377 | 0.00 | 0.00 |
| ATOM | 32696 | CA  | PRO | 2183 | 79.874 | 96.273 | 93.268 | 0.00 | 0.00 |
| ATOM | 32697 | HA  | PRO | 2183 | 80.004 | 96.900 | 92.386 | 0.00 | 0.00 |
| ATOM | 32698 | C   | PRO | 2183 | 81.101 | 95.301 | 93.467 | 0.00 | 0.00 |
| ATOM | 32699 | O   | PRO | 2183 | 82.143 | 95.620 | 92.961 | 0.00 | 0.00 |
| ATOM | 32700 | N   | ALA | 2184 | 80.946 | 94.122 | 94.158 | 0.00 | 0.00 |

|      |       |     |     |      |        |        |        |      |      |
|------|-------|-----|-----|------|--------|--------|--------|------|------|
| ATOM | 32701 | H   | ALA | 2184 | 80.007 | 93.988 | 94.505 | 0.00 | 0.00 |
| ATOM | 32702 | CA  | ALA | 2184 | 81.984 | 93.131 | 94.452 | 0.00 | 0.00 |
| ATOM | 32703 | HA  | ALA | 2184 | 82.885 | 93.558 | 94.893 | 0.00 | 0.00 |
| ATOM | 32704 | CB  | ALA | 2184 | 81.457 | 92.177 | 95.538 | 0.00 | 0.00 |
| ATOM | 32705 | HB1 | ALA | 2184 | 82.221 | 91.620 | 96.082 | 0.00 | 0.00 |
| ATOM | 32706 | HB2 | ALA | 2184 | 81.001 | 92.811 | 96.299 | 0.00 | 0.00 |
| ATOM | 32707 | HB3 | ALA | 2184 | 80.618 | 91.565 | 95.208 | 0.00 | 0.00 |
| ATOM | 32708 | C   | ALA | 2184 | 82.495 | 92.269 | 93.198 | 0.00 | 0.00 |
| ATOM | 32709 | O   | ALA | 2184 | 83.469 | 91.463 | 93.287 | 0.00 | 0.00 |
| ATOM | 32710 | N   | PHE | 2185 | 81.821 | 92.513 | 92.043 | 0.00 | 0.00 |
| ATOM | 32711 | H   | PHE | 2185 | 80.880 | 92.848 | 92.194 | 0.00 | 0.00 |
| ATOM | 32712 | CA  | PHE | 2185 | 81.997 | 91.744 | 90.757 | 0.00 | 0.00 |
| ATOM | 32713 | HA  | PHE | 2185 | 82.938 | 91.196 | 90.801 | 0.00 | 0.00 |
| ATOM | 32714 | CB  | PHE | 2185 | 80.836 | 90.661 | 90.643 | 0.00 | 0.00 |
| ATOM | 32715 | HB2 | PHE | 2185 | 79.917 | 91.234 | 90.516 | 0.00 | 0.00 |
| ATOM | 32716 | HB3 | PHE | 2185 | 80.960 | 90.040 | 89.756 | 0.00 | 0.00 |
| ATOM | 32717 | CG  | PHE | 2185 | 80.581 | 89.781 | 91.863 | 0.00 | 0.00 |
| ATOM | 32718 | CD1 | PHE | 2185 | 81.722 | 88.984 | 92.394 | 0.00 | 0.00 |
| ATOM | 32719 | HD1 | PHE | 2185 | 82.692 | 88.911 | 91.924 | 0.00 | 0.00 |
| ATOM | 32720 | CE1 | PHE | 2185 | 81.485 | 88.281 | 93.578 | 0.00 | 0.00 |
| ATOM | 32721 | HE1 | PHE | 2185 | 82.217 | 87.635 | 94.041 | 0.00 | 0.00 |
| ATOM | 32722 | CZ  | PHE | 2185 | 80.167 | 88.337 | 94.190 | 0.00 | 0.00 |
| ATOM | 32723 | HZ  | PHE | 2185 | 80.059 | 87.675 | 95.036 | 0.00 | 0.00 |
| ATOM | 32724 | CE2 | PHE | 2185 | 79.121 | 89.177 | 93.725 | 0.00 | 0.00 |
| ATOM | 32725 | HE2 | PHE | 2185 | 78.158 | 89.181 | 94.215 | 0.00 | 0.00 |
| ATOM | 32726 | CD2 | PHE | 2185 | 79.302 | 89.762 | 92.451 | 0.00 | 0.00 |

|      |       |     |     |      |        |        |        |      |      |
|------|-------|-----|-----|------|--------|--------|--------|------|------|
| ATOM | 32727 | HD2 | PHE | 2185 | 78.526 | 90.345 | 91.977 | 0.00 | 0.00 |
| ATOM | 32728 | C   | PHE | 2185 | 81.960 | 92.562 | 89.504 | 0.00 | 0.00 |
| ATOM | 32729 | O   | PHE | 2185 | 81.810 | 92.019 | 88.414 | 0.00 | 0.00 |
| ATOM | 32730 | N   | PHE | 2186 | 82.050 | 93.902 | 89.600 | 0.00 | 0.00 |
| ATOM | 32731 | H   | PHE | 2186 | 82.060 | 94.291 | 90.532 | 0.00 | 0.00 |
| ATOM | 32732 | CA  | PHE | 2186 | 82.048 | 94.816 | 88.544 | 0.00 | 0.00 |
| ATOM | 32733 | HA  | PHE | 2186 | 81.135 | 94.849 | 87.950 | 0.00 | 0.00 |
| ATOM | 32734 | CB  | PHE | 2186 | 82.238 | 96.329 | 88.938 | 0.00 | 0.00 |
| ATOM | 32735 | HB2 | PHE | 2186 | 81.410 | 96.691 | 89.548 | 0.00 | 0.00 |
| ATOM | 32736 | HB3 | PHE | 2186 | 83.128 | 96.519 | 89.537 | 0.00 | 0.00 |
| ATOM | 32737 | CG  | PHE | 2186 | 82.235 | 97.158 | 87.686 | 0.00 | 0.00 |
| ATOM | 32738 | CD1 | PHE | 2186 | 81.012 | 97.524 | 87.048 | 0.00 | 0.00 |
| ATOM | 32739 | HD1 | PHE | 2186 | 80.120 | 97.339 | 87.629 | 0.00 | 0.00 |
| ATOM | 32740 | CE1 | PHE | 2186 | 81.031 | 98.177 | 85.799 | 0.00 | 0.00 |
| ATOM | 32741 | HE1 | PHE | 2186 | 80.097 | 98.574 | 85.431 | 0.00 | 0.00 |
| ATOM | 32742 | CZ  | PHE | 2186 | 82.239 | 98.426 | 85.118 | 0.00 | 0.00 |
| ATOM | 32743 | HZ  | PHE | 2186 | 82.282 | 98.982 | 84.194 | 0.00 | 0.00 |
| ATOM | 32744 | CE2 | PHE | 2186 | 83.433 | 98.094 | 85.795 | 0.00 | 0.00 |
| ATOM | 32745 | HE2 | PHE | 2186 | 84.399 | 98.285 | 85.351 | 0.00 | 0.00 |
| ATOM | 32746 | CD2 | PHE | 2186 | 83.474 | 97.534 | 87.134 | 0.00 | 0.00 |
| ATOM | 32747 | HD2 | PHE | 2186 | 84.377 | 97.319 | 87.686 | 0.00 | 0.00 |
| ATOM | 32748 | C   | PHE | 2186 | 83.233 | 94.534 | 87.601 | 0.00 | 0.00 |
| ATOM | 32749 | O   | PHE | 2186 | 84.338 | 94.374 | 88.010 | 0.00 | 0.00 |
| ATOM | 32750 | N   | GLY | 2187 | 82.953 | 94.400 | 86.307 | 0.00 | 0.00 |
| ATOM | 32751 | H   | GLY | 2187 | 81.972 | 94.516 | 86.094 | 0.00 | 0.00 |
| ATOM | 32752 | CA  | GLY | 2187 | 83.817 | 94.012 | 85.229 | 0.00 | 0.00 |

|      |       |      |     |      |        |        |        |      |      |
|------|-------|------|-----|------|--------|--------|--------|------|------|
| ATOM | 32753 | HA2  | GLY | 2187 | 83.401 | 94.460 | 84.326 | 0.00 | 0.00 |
| ATOM | 32754 | HA3  | GLY | 2187 | 84.825 | 94.384 | 85.415 | 0.00 | 0.00 |
| ATOM | 32755 | C    | GLY | 2187 | 83.905 | 92.493 | 85.216 | 0.00 | 0.00 |
| ATOM | 32756 | O    | GLY | 2187 | 84.065 | 91.871 | 84.190 | 0.00 | 0.00 |
| ATOM | 32757 | N    | VAL | 2188 | 83.962 | 91.867 | 86.360 | 0.00 | 0.00 |
| ATOM | 32758 | H    | VAL | 2188 | 83.631 | 92.448 | 87.117 | 0.00 | 0.00 |
| ATOM | 32759 | CA   | VAL | 2188 | 84.311 | 90.408 | 86.623 | 0.00 | 0.00 |
| ATOM | 32760 | HA   | VAL | 2188 | 85.269 | 90.366 | 86.104 | 0.00 | 0.00 |
| ATOM | 32761 | CB   | VAL | 2188 | 84.670 | 90.093 | 88.020 | 0.00 | 0.00 |
| ATOM | 32762 | HB   | VAL | 2188 | 83.756 | 89.969 | 88.600 | 0.00 | 0.00 |
| ATOM | 32763 | CG1  | VAL | 2188 | 85.439 | 88.800 | 88.266 | 0.00 | 0.00 |
| ATOM | 32764 | 1HG1 | VAL | 2188 | 85.509 | 88.587 | 89.333 | 0.00 | 0.00 |
| ATOM | 32765 | 2HG1 | VAL | 2188 | 84.841 | 87.935 | 87.980 | 0.00 | 0.00 |
| ATOM | 32766 | 3HG1 | VAL | 2188 | 86.348 | 88.793 | 87.664 | 0.00 | 0.00 |
| ATOM | 32767 | CG2  | VAL | 2188 | 85.570 | 91.176 | 88.674 | 0.00 | 0.00 |
| ATOM | 32768 | 1HG2 | VAL | 2188 | 86.329 | 91.348 | 87.911 | 0.00 | 0.00 |
| ATOM | 32769 | 2HG2 | VAL | 2188 | 84.899 | 92.025 | 88.804 | 0.00 | 0.00 |
| ATOM | 32770 | 3HG2 | VAL | 2188 | 85.858 | 91.014 | 89.713 | 0.00 | 0.00 |
| ATOM | 32771 | C    | VAL | 2188 | 83.437 | 89.414 | 86.021 | 0.00 | 0.00 |
| ATOM | 32772 | O    | VAL | 2188 | 83.796 | 88.623 | 85.100 | 0.00 | 0.00 |
| ATOM | 32773 | N    | LYS | 2189 | 82.153 | 89.346 | 86.475 | 0.00 | 0.00 |
| ATOM | 32774 | H    | LYS | 2189 | 81.953 | 89.864 | 87.319 | 0.00 | 0.00 |
| ATOM | 32775 | CA   | LYS | 2189 | 81.015 | 88.545 | 85.959 | 0.00 | 0.00 |
| ATOM | 32776 | HA   | LYS | 2189 | 81.186 | 88.422 | 84.889 | 0.00 | 0.00 |
| ATOM | 32777 | CB   | LYS | 2189 | 81.104 | 87.160 | 86.602 | 0.00 | 0.00 |
| ATOM | 32778 | HB2  | LYS | 2189 | 81.141 | 87.422 | 87.659 | 0.00 | 0.00 |



|      |       |     |     |      |        |        |        |      |      |
|------|-------|-----|-----|------|--------|--------|--------|------|------|
| ATOM | 32779 | HB3 | LYS | 2189 | 80.169 | 86.620 | 86.450 | 0.00 | 0.00 |
| ATOM | 32780 | CG  | LYS | 2189 | 82.325 | 86.268 | 86.393 | 0.00 | 0.00 |
| ATOM | 32781 | HG2 | LYS | 2189 | 82.705 | 86.065 | 85.392 | 0.00 | 0.00 |
| ATOM | 32782 | HG3 | LYS | 2189 | 83.137 | 86.810 | 86.877 | 0.00 | 0.00 |
| ATOM | 32783 | CD  | LYS | 2189 | 82.161 | 84.882 | 87.100 | 0.00 | 0.00 |
| ATOM | 32784 | HD2 | LYS | 2189 | 81.540 | 85.112 | 87.965 | 0.00 | 0.00 |
| ATOM | 32785 | HD3 | LYS | 2189 | 81.581 | 84.237 | 86.441 | 0.00 | 0.00 |
| ATOM | 32786 | CE  | LYS | 2189 | 83.462 | 84.119 | 87.462 | 0.00 | 0.00 |
| ATOM | 32787 | HE2 | LYS | 2189 | 84.125 | 84.329 | 86.622 | 0.00 | 0.00 |
| ATOM | 32788 | HE3 | LYS | 2189 | 83.833 | 84.598 | 88.368 | 0.00 | 0.00 |
| ATOM | 32789 | NZ  | LYS | 2189 | 83.348 | 82.691 | 87.684 | 0.00 | 0.00 |
| ATOM | 32790 | HZ1 | LYS | 2189 | 83.196 | 82.281 | 86.774 | 0.00 | 0.00 |
| ATOM | 32791 | HZ2 | LYS | 2189 | 84.247 | 82.299 | 87.923 | 0.00 | 0.00 |
| ATOM | 32792 | HZ3 | LYS | 2189 | 82.608 | 82.369 | 88.292 | 0.00 | 0.00 |
| ATOM | 32793 | C   | LYS | 2189 | 79.677 | 89.245 | 86.203 | 0.00 | 0.00 |
| ATOM | 32794 | O   | LYS | 2189 | 79.496 | 89.595 | 87.366 | 0.00 | 0.00 |
| ATOM | 32795 | N   | PRO | 2190 | 78.889 | 89.631 | 85.165 | 0.00 | 0.00 |
| ATOM | 32796 | CD  | PRO | 2190 | 79.171 | 89.218 | 83.790 | 0.00 | 0.00 |
| ATOM | 32797 | HD2 | PRO | 2190 | 79.177 | 88.145 | 83.595 | 0.00 | 0.00 |
| ATOM | 32798 | HD3 | PRO | 2190 | 80.092 | 89.658 | 83.409 | 0.00 | 0.00 |
| ATOM | 32799 | CG  | PRO | 2190 | 77.970 | 89.814 | 83.003 | 0.00 | 0.00 |
| ATOM | 32800 | HG2 | PRO | 2190 | 78.292 | 90.225 | 82.046 | 0.00 | 0.00 |
| ATOM | 32801 | HG3 | PRO | 2190 | 77.205 | 89.065 | 82.798 | 0.00 | 0.00 |
| ATOM | 32802 | CB  | PRO | 2190 | 77.310 | 90.913 | 83.939 | 0.00 | 0.00 |
| ATOM | 32803 | HB2 | PRO | 2190 | 77.792 | 91.872 | 83.755 | 0.00 | 0.00 |
| ATOM | 32804 | HB3 | PRO | 2190 | 76.241 | 90.948 | 83.729 | 0.00 | 0.00 |

|            |      |     |      |        |        |        |      |      |
|------------|------|-----|------|--------|--------|--------|------|------|
| ATOM 32805 | CA   | PRO | 2190 | 77.652 | 90.475 | 85.369 | 0.00 | 0.00 |
| ATOM 32806 | HA   | PRO | 2190 | 77.786 | 91.363 | 85.987 | 0.00 | 0.00 |
| ATOM 32807 | C    | PRO | 2190 | 76.411 | 89.646 | 85.941 | 0.00 | 0.00 |
| ATOM 32808 | O    | PRO | 2190 | 76.255 | 88.447 | 85.579 | 0.00 | 0.00 |
| ATOM 32809 | N    | ALA | 2191 | 75.499 | 90.285 | 86.746 | 0.00 | 0.00 |
| ATOM 32810 | H    | ALA | 2191 | 75.538 | 91.278 | 86.929 | 0.00 | 0.00 |
| ATOM 32811 | CA   | ALA | 2191 | 74.280 | 89.630 | 87.274 | 0.00 | 0.00 |
| ATOM 32812 | HA   | ALA | 2191 | 74.629 | 88.682 | 87.682 | 0.00 | 0.00 |
| ATOM 32813 | CB   | ALA | 2191 | 73.610 | 90.558 | 88.323 | 0.00 | 0.00 |
| ATOM 32814 | HB1  | ALA | 2191 | 74.297 | 90.734 | 89.151 | 0.00 | 0.00 |
| ATOM 32815 | HB2  | ALA | 2191 | 73.361 | 91.567 | 87.997 | 0.00 | 0.00 |
| ATOM 32816 | HB3  | ALA | 2191 | 72.714 | 90.039 | 88.663 | 0.00 | 0.00 |
| ATOM 32817 | C    | ALA | 2191 | 73.305 | 89.298 | 86.177 | 0.00 | 0.00 |
| ATOM 32818 | O    | ALA | 2191 | 72.429 | 88.487 | 86.358 | 0.00 | 0.00 |
| ATOM 32819 | N    | THR | 2192 | 73.363 | 89.960 | 85.018 | 0.00 | 0.00 |
| ATOM 32820 | H    | THR | 2192 | 73.970 | 90.747 | 84.843 | 0.00 | 0.00 |
| ATOM 32821 | CA   | THR | 2192 | 72.478 | 89.733 | 83.845 | 0.00 | 0.00 |
| ATOM 32822 | HA   | THR | 2192 | 72.493 | 88.677 | 83.576 | 0.00 | 0.00 |
| ATOM 32823 | CB   | THR | 2192 | 71.018 | 90.216 | 84.137 | 0.00 | 0.00 |
| ATOM 32824 | HB   | THR | 2192 | 70.933 | 90.260 | 85.222 | 0.00 | 0.00 |
| ATOM 32825 | CG2  | THR | 2192 | 70.534 | 91.661 | 83.714 | 0.00 | 0.00 |
| ATOM 32826 | 1HG2 | THR | 2192 | 69.458 | 91.723 | 83.878 | 0.00 | 0.00 |
| ATOM 32827 | 2HG2 | THR | 2192 | 70.886 | 92.462 | 84.364 | 0.00 | 0.00 |
| ATOM 32828 | 3HG2 | THR | 2192 | 70.727 | 91.844 | 82.657 | 0.00 | 0.00 |
| ATOM 32829 | OG1  | THR | 2192 | 70.106 | 89.353 | 83.521 | 0.00 | 0.00 |
| ATOM 32830 | HG1  | THR | 2192 | 69.371 | 89.157 | 84.106 | 0.00 | 0.00 |

|            |      |     |      |        |        |        |      |      |
|------------|------|-----|------|--------|--------|--------|------|------|
| ATOM 32831 | C    | THR | 2192 | 73.031 | 90.526 | 82.621 | 0.00 | 0.00 |
| ATOM 32832 | O    | THR | 2192 | 73.814 | 91.477 | 82.843 | 0.00 | 0.00 |
| ATOM 32833 | N    | VAL | 2193 | 72.643 | 90.111 | 81.412 | 0.00 | 0.00 |
| ATOM 32834 | H    | VAL | 2193 | 71.968 | 89.360 | 81.426 | 0.00 | 0.00 |
| ATOM 32835 | CA   | VAL | 2193 | 72.749 | 90.879 | 80.172 | 0.00 | 0.00 |
| ATOM 32836 | HA   | VAL | 2193 | 73.150 | 91.856 | 80.442 | 0.00 | 0.00 |
| ATOM 32837 | CB   | VAL | 2193 | 73.802 | 90.206 | 79.312 | 0.00 | 0.00 |
| ATOM 32838 | HB   | VAL | 2193 | 73.581 | 89.148 | 79.170 | 0.00 | 0.00 |
| ATOM 32839 | CG1  | VAL | 2193 | 73.940 | 90.672 | 77.880 | 0.00 | 0.00 |
| ATOM 32840 | 1HG1 | VAL | 2193 | 74.677 | 90.034 | 77.391 | 0.00 | 0.00 |
| ATOM 32841 | 2HG1 | VAL | 2193 | 73.007 | 90.426 | 77.373 | 0.00 | 0.00 |
| ATOM 32842 | 3HG1 | VAL | 2193 | 74.237 | 91.715 | 77.766 | 0.00 | 0.00 |
| ATOM 32843 | CG2  | VAL | 2193 | 75.187 | 90.161 | 79.963 | 0.00 | 0.00 |
| ATOM 32844 | 1HG2 | VAL | 2193 | 75.927 | 89.473 | 79.553 | 0.00 | 0.00 |
| ATOM 32845 | 2HG2 | VAL | 2193 | 75.603 | 91.169 | 79.973 | 0.00 | 0.00 |
| ATOM 32846 | 3HG2 | VAL | 2193 | 75.124 | 89.914 | 81.022 | 0.00 | 0.00 |
| ATOM 32847 | C    | VAL | 2193 | 71.505 | 91.050 | 79.379 | 0.00 | 0.00 |
| ATOM 32848 | O    | VAL | 2193 | 70.779 | 90.087 | 79.190 | 0.00 | 0.00 |
| ATOM 32849 | N    | ILE | 2194 | 71.216 | 92.257 | 78.872 | 0.00 | 0.00 |
| ATOM 32850 | H    | ILE | 2194 | 71.878 | 93.013 | 78.971 | 0.00 | 0.00 |
| ATOM 32851 | CA   | ILE | 2194 | 70.047 | 92.586 | 78.049 | 0.00 | 0.00 |
| ATOM 32852 | HA   | ILE | 2194 | 69.389 | 91.739 | 77.854 | 0.00 | 0.00 |
| ATOM 32853 | CB   | ILE | 2194 | 69.222 | 93.639 | 78.767 | 0.00 | 0.00 |
| ATOM 32854 | HB   | ILE | 2194 | 69.690 | 94.624 | 78.746 | 0.00 | 0.00 |
| ATOM 32855 | CG2  | ILE | 2194 | 67.832 | 93.924 | 78.099 | 0.00 | 0.00 |
| ATOM 32856 | 1HG2 | ILE | 2194 | 67.818 | 93.552 | 77.075 | 0.00 | 0.00 |

|      |       |      |     |      |        |        |        |      |      |
|------|-------|------|-----|------|--------|--------|--------|------|------|
| ATOM | 32857 | 2HG2 | ILE | 2194 | 66.998 | 93.515 | 78.670 | 0.00 | 0.00 |
| ATOM | 32858 | 3HG2 | ILE | 2194 | 67.660 | 95.000 | 78.133 | 0.00 | 0.00 |
| ATOM | 32859 | CG1  | ILE | 2194 | 68.891 | 93.261 | 80.222 | 0.00 | 0.00 |
| ATOM | 32860 | 2HG1 | ILE | 2194 | 68.317 | 92.338 | 80.139 | 0.00 | 0.00 |
| ATOM | 32861 | 3HG1 | ILE | 2194 | 69.846 | 93.241 | 80.747 | 0.00 | 0.00 |
| ATOM | 32862 | CD1  | ILE | 2194 | 68.126 | 94.302 | 81.035 | 0.00 | 0.00 |
| ATOM | 32863 | 1HD1 | ILE | 2194 | 67.943 | 94.131 | 82.095 | 0.00 | 0.00 |
| ATOM | 32864 | 2HD1 | ILE | 2194 | 68.742 | 95.198 | 80.966 | 0.00 | 0.00 |
| ATOM | 32865 | 3HD1 | ILE | 2194 | 67.099 | 94.292 | 80.670 | 0.00 | 0.00 |
| ATOM | 32866 | C    | ILE | 2194 | 70.447 | 93.008 | 76.614 | 0.00 | 0.00 |
| ATOM | 32867 | O    | ILE | 2194 | 71.416 | 93.762 | 76.490 | 0.00 | 0.00 |
| ATOM | 32868 | N    | LYS | 2195 | 69.678 | 92.560 | 75.705 | 0.00 | 0.00 |
| ATOM | 32869 | H    | LYS | 2195 | 69.034 | 91.819 | 75.943 | 0.00 | 0.00 |
| ATOM | 32870 | CA   | LYS | 2195 | 69.730 | 92.880 | 74.310 | 0.00 | 0.00 |
| ATOM | 32871 | HA   | LYS | 2195 | 70.476 | 93.648 | 74.106 | 0.00 | 0.00 |
| ATOM | 32872 | CB   | LYS | 2195 | 69.990 | 91.638 | 73.429 | 0.00 | 0.00 |
| ATOM | 32873 | HB2  | LYS | 2195 | 69.270 | 90.843 | 73.624 | 0.00 | 0.00 |
| ATOM | 32874 | HB3  | LYS | 2195 | 69.808 | 91.793 | 72.366 | 0.00 | 0.00 |
| ATOM | 32875 | CG   | LYS | 2195 | 71.453 | 91.073 | 73.441 | 0.00 | 0.00 |
| ATOM | 32876 | HG2  | LYS | 2195 | 71.551 | 90.146 | 72.876 | 0.00 | 0.00 |
| ATOM | 32877 | HG3  | LYS | 2195 | 71.741 | 90.768 | 74.447 | 0.00 | 0.00 |
| ATOM | 32878 | CD   | LYS | 2195 | 72.456 | 92.030 | 72.908 | 0.00 | 0.00 |
| ATOM | 32879 | HD2  | LYS | 2195 | 72.581 | 92.930 | 73.511 | 0.00 | 0.00 |
| ATOM | 32880 | HD3  | LYS | 2195 | 73.416 | 91.554 | 73.109 | 0.00 | 0.00 |
| ATOM | 32881 | CE   | LYS | 2195 | 72.517 | 92.350 | 71.480 | 0.00 | 0.00 |
| ATOM | 32882 | HE2  | LYS | 2195 | 73.412 | 92.823 | 71.076 | 0.00 | 0.00 |

|            |     |     |      |        |        |        |      |      |
|------------|-----|-----|------|--------|--------|--------|------|------|
| ATOM 32883 | HE3 | LYS | 2195 | 72.188 | 91.430 | 70.998 | 0.00 | 0.00 |
| ATOM 32884 | NZ  | LYS | 2195 | 71.460 | 93.362 | 71.201 | 0.00 | 0.00 |
| ATOM 32885 | HZ1 | LYS | 2195 | 71.647 | 94.187 | 71.754 | 0.00 | 0.00 |
| ATOM 32886 | HZ2 | LYS | 2195 | 71.613 | 93.627 | 70.238 | 0.00 | 0.00 |
| ATOM 32887 | HZ3 | LYS | 2195 | 70.523 | 93.027 | 71.372 | 0.00 | 0.00 |
| ATOM 32888 | C   | LYS | 2195 | 68.384 | 93.514 | 73.860 | 0.00 | 0.00 |
| ATOM 32889 | O   | LYS | 2195 | 67.276 | 92.897 | 73.941 | 0.00 | 0.00 |
| ATOM 32890 | N   | GLY | 2196 | 68.428 | 94.770 | 73.431 | 0.00 | 0.00 |
| ATOM 32891 | H   | GLY | 2196 | 69.341 | 95.192 | 73.340 | 0.00 | 0.00 |
| ATOM 32892 | CA  | GLY | 2196 | 67.320 | 95.530 | 72.850 | 0.00 | 0.00 |
| ATOM 32893 | HA2 | GLY | 2196 | 67.475 | 96.609 | 72.832 | 0.00 | 0.00 |
| ATOM 32894 | HA3 | GLY | 2196 | 67.228 | 95.247 | 71.801 | 0.00 | 0.00 |
| ATOM 32895 | C   | GLY | 2196 | 65.991 | 95.363 | 73.669 | 0.00 | 0.00 |
| ATOM 32896 | O   | GLY | 2196 | 64.947 | 95.116 | 73.091 | 0.00 | 0.00 |
| ATOM 32897 | N   | GLY | 2197 | 66.147 | 95.226 | 74.994 | 0.00 | 0.00 |
| ATOM 32898 | H   | GLY | 2197 | 67.036 | 95.521 | 75.373 | 0.00 | 0.00 |
| ATOM 32899 | CA  | GLY | 2197 | 65.059 | 95.140 | 75.990 | 0.00 | 0.00 |
| ATOM 32900 | HA2 | GLY | 2197 | 65.419 | 95.604 | 76.909 | 0.00 | 0.00 |
| ATOM 32901 | HA3 | GLY | 2197 | 64.169 | 95.693 | 75.691 | 0.00 | 0.00 |
| ATOM 32902 | C   | GLY | 2197 | 64.570 | 93.707 | 76.342 | 0.00 | 0.00 |
| ATOM 32903 | O   | GLY | 2197 | 63.718 | 93.642 | 77.204 | 0.00 | 0.00 |
| ATOM 32904 | N   | MET | 2198 | 65.081 | 92.640 | 75.691 | 0.00 | 0.00 |
| ATOM 32905 | H   | MET | 2198 | 65.707 | 92.833 | 74.922 | 0.00 | 0.00 |
| ATOM 32906 | CA  | MET | 2198 | 64.818 | 91.291 | 76.084 | 0.00 | 0.00 |
| ATOM 32907 | HA  | MET | 2198 | 64.030 | 91.289 | 76.837 | 0.00 | 0.00 |
| ATOM 32908 | CB  | MET | 2198 | 64.312 | 90.445 | 74.957 | 0.00 | 0.00 |

|            |               |        |        |        |      |      |
|------------|---------------|--------|--------|--------|------|------|
| ATOM 32909 | HB2 MET 2198  | 63.673 | 91.115 | 74.383 | 0.00 | 0.00 |
| ATOM 32910 | HB3 MET 2198  | 65.123 | 90.127 | 74.301 | 0.00 | 0.00 |
| ATOM 32911 | CG MET 2198   | 63.555 | 89.219 | 75.460 | 0.00 | 0.00 |
| ATOM 32912 | HG2 MET 2198  | 64.237 | 88.440 | 75.799 | 0.00 | 0.00 |
| ATOM 32913 | HG3 MET 2198  | 62.942 | 89.669 | 76.240 | 0.00 | 0.00 |
| ATOM 32914 | SD MET 2198   | 62.421 | 88.407 | 74.242 | 0.00 | 0.00 |
| ATOM 32915 | CE MET 2198   | 61.183 | 87.798 | 75.429 | 0.00 | 0.00 |
| ATOM 32916 | HE1 MET 2198  | 60.419 | 88.557 | 75.596 | 0.00 | 0.00 |
| ATOM 32917 | HE2 MET 2198  | 60.763 | 86.883 | 75.013 | 0.00 | 0.00 |
| ATOM 32918 | HE3 MET 2198  | 61.684 | 87.630 | 76.382 | 0.00 | 0.00 |
| ATOM 32919 | C MET 2198    | 66.123 | 90.649 | 76.628 | 0.00 | 0.00 |
| ATOM 32920 | O MET 2198    | 67.118 | 90.621 | 75.986 | 0.00 | 0.00 |
| ATOM 32921 | N ILE 2199    | 65.982 | 90.175 | 77.864 | 0.00 | 0.00 |
| ATOM 32922 | H ILE 2199    | 65.074 | 90.381 | 78.257 | 0.00 | 0.00 |
| ATOM 32923 | CA ILE 2199   | 67.127 | 89.526 | 78.603 | 0.00 | 0.00 |
| ATOM 32924 | HA ILE 2199   | 67.987 | 90.194 | 78.648 | 0.00 | 0.00 |
| ATOM 32925 | CB ILE 2199   | 66.853 | 89.238 | 80.087 | 0.00 | 0.00 |
| ATOM 32926 | HB ILE 2199   | 66.285 | 88.308 | 80.076 | 0.00 | 0.00 |
| ATOM 32927 | CG2 ILE 2199  | 68.106 | 88.960 | 80.934 | 0.00 | 0.00 |
| ATOM 32928 | 1HG2 ILE 2199 | 68.871 | 88.626 | 80.233 | 0.00 | 0.00 |
| ATOM 32929 | 2HG2 ILE 2199 | 68.529 | 89.838 | 81.421 | 0.00 | 0.00 |
| ATOM 32930 | 3HG2 ILE 2199 | 67.906 | 88.252 | 81.738 | 0.00 | 0.00 |
| ATOM 32931 | CG1 ILE 2199  | 65.896 | 90.185 | 80.815 | 0.00 | 0.00 |
| ATOM 32932 | 2HG1 ILE 2199 | 66.355 | 91.154 | 81.010 | 0.00 | 0.00 |
| ATOM 32933 | 3HG1 ILE 2199 | 65.014 | 90.383 | 80.206 | 0.00 | 0.00 |
| ATOM 32934 | CD1 ILE 2199  | 65.510 | 89.671 | 82.253 | 0.00 | 0.00 |

|            |      |     |      |        |        |        |      |      |
|------------|------|-----|------|--------|--------|--------|------|------|
| ATOM 32935 | 1HD1 | ILE | 2199 | 65.050 | 88.685 | 82.189 | 0.00 | 0.00 |
| ATOM 32936 | 2HD1 | ILE | 2199 | 66.389 | 89.564 | 82.889 | 0.00 | 0.00 |
| ATOM 32937 | 3HD1 | ILE | 2199 | 64.823 | 90.388 | 82.702 | 0.00 | 0.00 |
| ATOM 32938 | C    | ILE | 2199 | 67.647 | 88.308 | 77.868 | 0.00 | 0.00 |
| ATOM 32939 | O    | ILE | 2199 | 66.878 | 87.474 | 77.425 | 0.00 | 0.00 |
| ATOM 32940 | N    | ALA | 2200 | 68.947 | 88.236 | 77.617 | 0.00 | 0.00 |
| ATOM 32941 | H    | ALA | 2200 | 69.486 | 89.010 | 77.978 | 0.00 | 0.00 |
| ATOM 32942 | CA   | ALA | 2200 | 69.602 | 87.448 | 76.548 | 0.00 | 0.00 |
| ATOM 32943 | HA   | ALA | 2200 | 68.882 | 87.031 | 75.844 | 0.00 | 0.00 |
| ATOM 32944 | CB   | ALA | 2200 | 70.425 | 88.385 | 75.605 | 0.00 | 0.00 |
| ATOM 32945 | HB1  | ALA | 2200 | 70.739 | 87.923 | 74.669 | 0.00 | 0.00 |
| ATOM 32946 | HB2  | ALA | 2200 | 69.821 | 89.270 | 75.406 | 0.00 | 0.00 |
| ATOM 32947 | HB3  | ALA | 2200 | 71.363 | 88.657 | 76.089 | 0.00 | 0.00 |
| ATOM 32948 | C    | ALA | 2200 | 70.420 | 86.238 | 77.017 | 0.00 | 0.00 |
| ATOM 32949 | O    | ALA | 2200 | 70.629 | 85.313 | 76.221 | 0.00 | 0.00 |
| ATOM 32950 | N    | ILE | 2201 | 70.990 | 86.323 | 78.256 | 0.00 | 0.00 |
| ATOM 32951 | H    | ILE | 2201 | 70.723 | 87.094 | 78.851 | 0.00 | 0.00 |
| ATOM 32952 | CA   | ILE | 2201 | 71.807 | 85.332 | 78.950 | 0.00 | 0.00 |
| ATOM 32953 | HA   | ILE | 2201 | 71.132 | 84.477 | 78.967 | 0.00 | 0.00 |
| ATOM 32954 | CB   | ILE | 2201 | 73.034 | 84.894 | 78.133 | 0.00 | 0.00 |
| ATOM 32955 | HB   | ILE | 2201 | 72.671 | 84.213 | 77.363 | 0.00 | 0.00 |
| ATOM 32956 | CG2  | ILE | 2201 | 73.710 | 86.095 | 77.324 | 0.00 | 0.00 |
| ATOM 32957 | 1HG2 | ILE | 2201 | 72.910 | 86.431 | 76.664 | 0.00 | 0.00 |
| ATOM 32958 | 2HG2 | ILE | 2201 | 74.125 | 86.823 | 78.020 | 0.00 | 0.00 |
| ATOM 32959 | 3HG2 | ILE | 2201 | 74.540 | 85.713 | 76.729 | 0.00 | 0.00 |
| ATOM 32960 | CG1  | ILE | 2201 | 74.077 | 84.261 | 79.059 | 0.00 | 0.00 |

|            |      |     |      |        |        |        |      |      |
|------------|------|-----|------|--------|--------|--------|------|------|
| ATOM 32961 | 2HG1 | ILE | 2201 | 74.583 | 85.027 | 79.648 | 0.00 | 0.00 |
| ATOM 32962 | 3HG1 | ILE | 2201 | 73.603 | 83.526 | 79.711 | 0.00 | 0.00 |
| ATOM 32963 | CD1  | ILE | 2201 | 75.020 | 83.403 | 78.178 | 0.00 | 0.00 |
| ATOM 32964 | 1HD1 | ILE | 2201 | 75.635 | 83.937 | 77.453 | 0.00 | 0.00 |
| ATOM 32965 | 2HD1 | ILE | 2201 | 75.814 | 83.018 | 78.819 | 0.00 | 0.00 |
| ATOM 32966 | 3HD1 | ILE | 2201 | 74.364 | 82.720 | 77.638 | 0.00 | 0.00 |
| ATOM 32967 | C    | ILE | 2201 | 71.945 | 85.834 | 80.445 | 0.00 | 0.00 |
| ATOM 32968 | O    | ILE | 2201 | 72.295 | 86.991 | 80.646 | 0.00 | 0.00 |
| ATOM 32969 | N    | ALA | 2202 | 71.880 | 84.934 | 81.402 | 0.00 | 0.00 |
| ATOM 32970 | H    | ALA | 2202 | 71.727 | 84.002 | 81.045 | 0.00 | 0.00 |
| ATOM 32971 | CA   | ALA | 2202 | 71.804 | 85.191 | 82.799 | 0.00 | 0.00 |
| ATOM 32972 | HA   | ALA | 2202 | 72.389 | 86.090 | 82.990 | 0.00 | 0.00 |
| ATOM 32973 | CB   | ALA | 2202 | 70.382 | 85.607 | 83.158 | 0.00 | 0.00 |
| ATOM 32974 | HB1  | ALA | 2202 | 70.458 | 85.927 | 84.198 | 0.00 | 0.00 |
| ATOM 32975 | HB2  | ALA | 2202 | 70.045 | 86.402 | 82.494 | 0.00 | 0.00 |
| ATOM 32976 | HB3  | ALA | 2202 | 69.784 | 84.697 | 83.120 | 0.00 | 0.00 |
| ATOM 32977 | C    | ALA | 2202 | 72.324 | 84.053 | 83.689 | 0.00 | 0.00 |
| ATOM 32978 | O    | ALA | 2202 | 72.169 | 82.869 | 83.319 | 0.00 | 0.00 |
| ATOM 32979 | N    | PRO | 2203 | 73.031 | 84.432 | 84.775 | 0.00 | 0.00 |
| ATOM 32980 | CD   | PRO | 2203 | 73.306 | 85.737 | 85.262 | 0.00 | 0.00 |
| ATOM 32981 | HD2  | PRO | 2203 | 72.329 | 86.173 | 85.471 | 0.00 | 0.00 |
| ATOM 32982 | HD3  | PRO | 2203 | 73.852 | 86.472 | 84.669 | 0.00 | 0.00 |
| ATOM 32983 | CG   | PRO | 2203 | 74.062 | 85.603 | 86.479 | 0.00 | 0.00 |
| ATOM 32984 | HG2  | PRO | 2203 | 74.970 | 86.202 | 86.542 | 0.00 | 0.00 |
| ATOM 32985 | HG3  | PRO | 2203 | 73.432 | 85.858 | 87.331 | 0.00 | 0.00 |
| ATOM 32986 | CB   | PRO | 2203 | 74.478 | 84.143 | 86.697 | 0.00 | 0.00 |



|            |         |      |        |        |        |      |      |
|------------|---------|------|--------|--------|--------|------|------|
| ATOM 32987 | HB2 PRO | 2203 | 75.495 | 84.151 | 86.307 | 0.00 | 0.00 |
| ATOM 32988 | HB3 PRO | 2203 | 74.420 | 83.721 | 87.701 | 0.00 | 0.00 |
| ATOM 32989 | CA PRO  | 2203 | 73.543 | 83.399 | 85.710 | 0.00 | 0.00 |
| ATOM 32990 | HA PRO  | 2203 | 74.047 | 82.572 | 85.211 | 0.00 | 0.00 |
| ATOM 32991 | C PRO   | 2203 | 72.332 | 82.803 | 86.352 | 0.00 | 0.00 |
| ATOM 32992 | O PRO   | 2203 | 71.578 | 83.455 | 87.061 | 0.00 | 0.00 |
| ATOM 32993 | N MET   | 2204 | 72.049 | 81.533 | 86.163 | 0.00 | 0.00 |
| ATOM 32994 | H MET   | 2204 | 72.719 | 80.984 | 85.644 | 0.00 | 0.00 |
| ATOM 32995 | CA MET  | 2204 | 70.758 | 80.956 | 86.607 | 0.00 | 0.00 |
| ATOM 32996 | HA MET  | 2204 | 70.248 | 81.554 | 87.362 | 0.00 | 0.00 |
| ATOM 32997 | CB MET  | 2204 | 69.862 | 81.034 | 85.376 | 0.00 | 0.00 |
| ATOM 32998 | HB2 MET | 2204 | 69.636 | 82.099 | 85.331 | 0.00 | 0.00 |
| ATOM 32999 | HB3 MET | 2204 | 70.409 | 80.703 | 84.493 | 0.00 | 0.00 |
| ATOM 33000 | CG MET  | 2204 | 68.500 | 80.292 | 85.563 | 0.00 | 0.00 |
| ATOM 33001 | HG2 MET | 2204 | 67.948 | 80.335 | 84.624 | 0.00 | 0.00 |
| ATOM 33002 | HG3 MET | 2204 | 68.601 | 79.267 | 85.920 | 0.00 | 0.00 |
| ATOM 33003 | SD MET  | 2204 | 67.481 | 81.191 | 86.724 | 0.00 | 0.00 |
| ATOM 33004 | CE MET  | 2204 | 66.241 | 79.841 | 86.774 | 0.00 | 0.00 |
| ATOM 33005 | HE1 MET | 2204 | 65.962 | 79.712 | 85.728 | 0.00 | 0.00 |
| ATOM 33006 | HE2 MET | 2204 | 66.637 | 78.887 | 87.121 | 0.00 | 0.00 |
| ATOM 33007 | HE3 MET | 2204 | 65.375 | 80.173 | 87.347 | 0.00 | 0.00 |
| ATOM 33008 | C MET   | 2204 | 70.827 | 79.482 | 87.015 | 0.00 | 0.00 |
| ATOM 33009 | O MET   | 2204 | 71.669 | 78.748 | 86.480 | 0.00 | 0.00 |
| ATOM 33010 | N GLY   | 2205 | 70.120 | 79.128 | 88.090 | 0.00 | 0.00 |
| ATOM 33011 | H GLY   | 2205 | 69.362 | 79.700 | 88.434 | 0.00 | 0.00 |
| ATOM 33012 | CA GLY  | 2205 | 70.253 | 77.803 | 88.721 | 0.00 | 0.00 |

|      |       |      |     |      |        |        |        |      |      |
|------|-------|------|-----|------|--------|--------|--------|------|------|
| ATOM | 33013 | HA2  | GLY | 2205 | 71.276 | 77.514 | 88.962 | 0.00 | 0.00 |
| ATOM | 33014 | HA3  | GLY | 2205 | 69.695 | 77.861 | 89.656 | 0.00 | 0.00 |
| ATOM | 33015 | C    | GLY | 2205 | 69.701 | 76.588 | 88.042 | 0.00 | 0.00 |
| ATOM | 33016 | O    | GLY | 2205 | 69.266 | 76.549 | 86.891 | 0.00 | 0.00 |
| ATOM | 33017 | N    | ASP | 2206 | 69.643 | 75.564 | 88.864 | 0.00 | 0.00 |
| ATOM | 33018 | H    | ASP | 2206 | 70.006 | 75.693 | 89.798 | 0.00 | 0.00 |
| ATOM | 33019 | CA   | ASP | 2206 | 69.188 | 74.241 | 88.504 | 0.00 | 0.00 |
| ATOM | 33020 | HA   | ASP | 2206 | 69.926 | 73.854 | 87.802 | 0.00 | 0.00 |
| ATOM | 33021 | CB   | ASP | 2206 | 69.049 | 73.424 | 89.805 | 0.00 | 0.00 |
| ATOM | 33022 | HB2  | ASP | 2206 | 70.030 | 73.226 | 90.236 | 0.00 | 0.00 |
| ATOM | 33023 | HB3  | ASP | 2206 | 68.509 | 74.052 | 90.512 | 0.00 | 0.00 |
| ATOM | 33024 | CG   | ASP | 2206 | 68.346 | 72.122 | 89.595 | 0.00 | 0.00 |
| ATOM | 33025 | OD1  | ASP | 2206 | 67.733 | 71.654 | 90.501 | 0.00 | 0.00 |
| ATOM | 33026 | OD2  | ASP | 2206 | 68.460 | 71.551 | 88.446 | 0.00 | 0.00 |
| ATOM | 33027 | C    | ASP | 2206 | 67.824 | 74.231 | 87.767 | 0.00 | 0.00 |
| ATOM | 33028 | O    | ASP | 2206 | 66.822 | 74.664 | 88.382 | 0.00 | 0.00 |
| ATOM | 33029 | N    | ILE | 2207 | 67.781 | 73.848 | 86.532 | 0.00 | 0.00 |
| ATOM | 33030 | H    | ILE | 2207 | 68.661 | 73.594 | 86.107 | 0.00 | 0.00 |
| ATOM | 33031 | CA   | ILE | 2207 | 66.530 | 73.650 | 85.791 | 0.00 | 0.00 |
| ATOM | 33032 | HA   | ILE | 2207 | 66.073 | 74.626 | 85.627 | 0.00 | 0.00 |
| ATOM | 33033 | CB   | ILE | 2207 | 66.912 | 72.990 | 84.401 | 0.00 | 0.00 |
| ATOM | 33034 | HB   | ILE | 2207 | 65.940 | 72.644 | 84.050 | 0.00 | 0.00 |
| ATOM | 33035 | CG2  | ILE | 2207 | 67.528 | 74.097 | 83.387 | 0.00 | 0.00 |
| ATOM | 33036 | 1HG2 | ILE | 2207 | 67.783 | 73.745 | 82.388 | 0.00 | 0.00 |
| ATOM | 33037 | 2HG2 | ILE | 2207 | 66.842 | 74.906 | 83.136 | 0.00 | 0.00 |
| ATOM | 33038 | 3HG2 | ILE | 2207 | 68.418 | 74.558 | 83.817 | 0.00 | 0.00 |

|      |       |      |     |      |        |        |        |      |      |
|------|-------|------|-----|------|--------|--------|--------|------|------|
| ATOM | 33039 | CG1  | ILE | 2207 | 67.655 | 71.605 | 84.523 | 0.00 | 0.00 |
| ATOM | 33040 | 2HG1 | ILE | 2207 | 67.411 | 71.080 | 85.447 | 0.00 | 0.00 |
| ATOM | 33041 | 3HG1 | ILE | 2207 | 67.321 | 70.881 | 83.780 | 0.00 | 0.00 |
| ATOM | 33042 | CD1  | ILE | 2207 | 69.161 | 71.679 | 84.433 | 0.00 | 0.00 |
| ATOM | 33043 | 1HD1 | ILE | 2207 | 69.513 | 70.650 | 84.508 | 0.00 | 0.00 |
| ATOM | 33044 | 2HD1 | ILE | 2207 | 69.438 | 72.186 | 83.509 | 0.00 | 0.00 |
| ATOM | 33045 | 3HD1 | ILE | 2207 | 69.553 | 72.250 | 85.275 | 0.00 | 0.00 |
| ATOM | 33046 | C    | ILE | 2207 | 65.434 | 72.734 | 86.448 | 0.00 | 0.00 |
| ATOM | 33047 | O    | ILE | 2207 | 64.237 | 72.984 | 86.215 | 0.00 | 0.00 |
| ATOM | 33048 | N    | ASN | 2208 | 65.728 | 71.816 | 87.383 | 0.00 | 0.00 |
| ATOM | 33049 | H    | ASN | 2208 | 66.683 | 71.722 | 87.697 | 0.00 | 0.00 |
| ATOM | 33050 | CA   | ASN | 2208 | 64.760 | 71.106 | 88.156 | 0.00 | 0.00 |
| ATOM | 33051 | HA   | ASN | 2208 | 63.990 | 70.700 | 87.501 | 0.00 | 0.00 |
| ATOM | 33052 | CB   | ASN | 2208 | 65.590 | 69.871 | 88.808 | 0.00 | 0.00 |
| ATOM | 33053 | HB2  | ASN | 2208 | 65.484 | 69.048 | 88.101 | 0.00 | 0.00 |
| ATOM | 33054 | HB3  | ASN | 2208 | 66.641 | 70.125 | 88.944 | 0.00 | 0.00 |
| ATOM | 33055 | CG   | ASN | 2208 | 65.050 | 69.390 | 90.163 | 0.00 | 0.00 |
| ATOM | 33056 | OD1  | ASN | 2208 | 64.198 | 68.467 | 90.232 | 0.00 | 0.00 |
| ATOM | 33057 | ND2  | ASN | 2208 | 65.398 | 69.968 | 91.256 | 0.00 | 0.00 |
| ATOM | 33058 | 1HD2 | ASN | 2208 | 65.130 | 69.497 | 92.108 | 0.00 | 0.00 |
| ATOM | 33059 | 2HD2 | ASN | 2208 | 65.997 | 70.780 | 91.207 | 0.00 | 0.00 |
| ATOM | 33060 | C    | ASN | 2208 | 64.136 | 71.992 | 89.128 | 0.00 | 0.00 |
| ATOM | 33061 | O    | ASN | 2208 | 62.947 | 71.838 | 89.473 | 0.00 | 0.00 |
| ATOM | 33062 | N    | ALA | 2209 | 64.861 | 72.893 | 89.754 | 0.00 | 0.00 |
| ATOM | 33063 | H    | ALA | 2209 | 65.746 | 73.247 | 89.420 | 0.00 | 0.00 |
| ATOM | 33064 | CA   | ALA | 2209 | 64.472 | 73.362 | 91.099 | 0.00 | 0.00 |

|      |       |      |     |      |        |        |        |      |      |
|------|-------|------|-----|------|--------|--------|--------|------|------|
| ATOM | 33065 | HA   | ALA | 2209 | 64.258 | 72.503 | 91.735 | 0.00 | 0.00 |
| ATOM | 33066 | CB   | ALA | 2209 | 65.703 | 74.055 | 91.823 | 0.00 | 0.00 |
| ATOM | 33067 | HB1  | ALA | 2209 | 66.167 | 74.738 | 91.111 | 0.00 | 0.00 |
| ATOM | 33068 | HB2  | ALA | 2209 | 65.465 | 74.522 | 92.778 | 0.00 | 0.00 |
| ATOM | 33069 | HB3  | ALA | 2209 | 66.502 | 73.322 | 91.931 | 0.00 | 0.00 |
| ATOM | 33070 | C    | ALA | 2209 | 63.203 | 74.296 | 91.172 | 0.00 | 0.00 |
| ATOM | 33071 | O    | ALA | 2209 | 62.710 | 74.770 | 90.114 | 0.00 | 0.00 |
| ATOM | 33072 | N    | SER | 2210 | 62.745 | 74.622 | 92.341 | 0.00 | 0.00 |
| ATOM | 33073 | H    | SER | 2210 | 63.153 | 74.089 | 93.096 | 0.00 | 0.00 |
| ATOM | 33074 | CA   | SER | 2210 | 61.449 | 75.250 | 92.645 | 0.00 | 0.00 |
| ATOM | 33075 | HA   | SER | 2210 | 60.671 | 74.954 | 91.942 | 0.00 | 0.00 |
| ATOM | 33076 | CB   | SER | 2210 | 60.955 | 74.904 | 94.050 | 0.00 | 0.00 |
| ATOM | 33077 | HB2  | SER | 2210 | 61.694 | 75.323 | 94.733 | 0.00 | 0.00 |
| ATOM | 33078 | HB3  | SER | 2210 | 59.985 | 75.349 | 94.273 | 0.00 | 0.00 |
| ATOM | 33079 | OG   | SER | 2210 | 60.899 | 73.502 | 94.277 | 0.00 | 0.00 |
| ATOM | 33080 | HG   | SER | 2210 | 61.794 | 73.295 | 94.553 | 0.00 | 0.00 |
| ATOM | 33081 | C    | SER | 2210 | 61.557 | 76.761 | 92.548 | 0.00 | 0.00 |
| ATOM | 33082 | O    | SER | 2210 | 60.589 | 77.449 | 92.672 | 0.00 | 0.00 |
| ATOM | 33083 | N    | ILE | 2211 | 62.821 | 77.308 | 92.513 | 0.00 | 0.00 |
| ATOM | 33084 | H    | ILE | 2211 | 63.557 | 76.653 | 92.290 | 0.00 | 0.00 |
| ATOM | 33085 | CA   | ILE | 2211 | 63.136 | 78.730 | 92.499 | 0.00 | 0.00 |
| ATOM | 33086 | HA   | ILE | 2211 | 62.346 | 79.342 | 92.064 | 0.00 | 0.00 |
| ATOM | 33087 | CB   | ILE | 2211 | 63.351 | 79.095 | 93.994 | 0.00 | 0.00 |
| ATOM | 33088 | HB   | ILE | 2211 | 63.957 | 80.001 | 94.015 | 0.00 | 0.00 |
| ATOM | 33089 | CG2  | ILE | 2211 | 62.084 | 79.422 | 94.770 | 0.00 | 0.00 |
| ATOM | 33090 | 1HG2 | ILE | 2211 | 61.333 | 78.632 | 94.728 | 0.00 | 0.00 |

|            |      |     |      |        |        |        |      |      |
|------------|------|-----|------|--------|--------|--------|------|------|
| ATOM 33091 | 2HG2 | ILE | 2211 | 62.326 | 79.782 | 95.770 | 0.00 | 0.00 |
| ATOM 33092 | 3HG2 | ILE | 2211 | 61.671 | 80.272 | 94.228 | 0.00 | 0.00 |
| ATOM 33093 | CG1  | ILE | 2211 | 64.120 | 78.049 | 94.800 | 0.00 | 0.00 |
| ATOM 33094 | 2HG1 | ILE | 2211 | 63.418 | 77.280 | 95.123 | 0.00 | 0.00 |
| ATOM 33095 | 3HG1 | ILE | 2211 | 64.912 | 77.660 | 94.160 | 0.00 | 0.00 |
| ATOM 33096 | CD1  | ILE | 2211 | 64.734 | 78.650 | 96.047 | 0.00 | 0.00 |
| ATOM 33097 | 1HD1 | ILE | 2211 | 63.928 | 78.988 | 96.698 | 0.00 | 0.00 |
| ATOM 33098 | 2HD1 | ILE | 2211 | 65.369 | 77.928 | 96.562 | 0.00 | 0.00 |
| ATOM 33099 | 3HD1 | ILE | 2211 | 65.282 | 79.571 | 95.852 | 0.00 | 0.00 |
| ATOM 33100 | C    | ILE | 2211 | 64.453 | 78.987 | 91.754 | 0.00 | 0.00 |
| ATOM 33101 | O    | ILE | 2211 | 65.282 | 78.110 | 91.665 | 0.00 | 0.00 |
| ATOM 33102 | N    | PRO | 2212 | 64.767 | 80.200 | 91.334 | 0.00 | 0.00 |
| ATOM 33103 | CD   | PRO | 2212 | 63.902 | 81.356 | 91.546 | 0.00 | 0.00 |
| ATOM 33104 | HD2  | PRO | 2212 | 62.860 | 81.096 | 91.730 | 0.00 | 0.00 |
| ATOM 33105 | HD3  | PRO | 2212 | 64.436 | 81.854 | 92.356 | 0.00 | 0.00 |
| ATOM 33106 | CG   | PRO | 2212 | 63.937 | 82.186 | 90.254 | 0.00 | 0.00 |
| ATOM 33107 | HG2  | PRO | 2212 | 63.238 | 81.702 | 89.572 | 0.00 | 0.00 |
| ATOM 33108 | HG3  | PRO | 2212 | 63.725 | 83.237 | 90.454 | 0.00 | 0.00 |
| ATOM 33109 | CB   | PRO | 2212 | 65.335 | 81.953 | 89.798 | 0.00 | 0.00 |
| ATOM 33110 | HB2  | PRO | 2212 | 65.374 | 81.982 | 88.709 | 0.00 | 0.00 |
| ATOM 33111 | HB3  | PRO | 2212 | 65.915 | 82.757 | 90.251 | 0.00 | 0.00 |
| ATOM 33112 | CA   | PRO | 2212 | 65.781 | 80.531 | 90.274 | 0.00 | 0.00 |
| ATOM 33113 | HA   | PRO | 2212 | 65.618 | 79.809 | 89.474 | 0.00 | 0.00 |
| ATOM 33114 | C    | PRO | 2212 | 67.185 | 80.565 | 90.726 | 0.00 | 0.00 |
| ATOM 33115 | O    | PRO | 2212 | 68.094 | 81.084 | 90.127 | 0.00 | 0.00 |
| ATOM 33116 | N    | THR | 2213 | 67.505 | 79.981 | 91.856 | 0.00 | 0.00 |

ATOM 33117 H THR 2213 66.799 79.452 92.348 0.00 0.00  
ATOM 33118 CA THR 2213 68.712 80.310 92.699 0.00 0.00  
ATOM 33119 HA THR 2213 69.453 80.791 92.061 0.00 0.00  
ATOM 33120 CB THR 2213 68.296 81.343 93.853 0.00 0.00  
ATOM 33121 HB THR 2213 69.107 81.295 94.580 0.00 0.00  
ATOM 33122 CG2 THR 2213 68.150 82.721 93.290 0.00 0.00  
ATOM 33123 1HG2 THR 2213 69.115 83.195 93.113 0.00 0.00  
ATOM 33124 2HG2 THR 2213 67.631 82.735 92.332 0.00 0.00  
ATOM 33125 3HG2 THR 2213 67.549 83.334 93.962 0.00 0.00  
ATOM 33126 OG1 THR 2213 67.165 80.909 94.548 0.00 0.00  
TER 0 0  
ATOM 33127 HG1 THR 2213 67.289 80.827 95.497 0.00 0.00  
ATOM 33128 C THR 2213 69.433 79.027 93.260 0.00 0.00  
ATOM 33129 O THR 2213 70.586 79.229 93.656 0.00 0.00  
ATOM 33130 N PRO 2214 68.886 77.790 93.404 0.00 0.00  
ATOM 33131 CD PRO 2214 67.447 77.471 93.675 0.00 0.00  
ATOM 33132 HD2 PRO 2214 67.100 77.147 92.694 0.00 0.00  
ATOM 33133 HD3 PRO 2214 66.882 78.337 94.020 0.00 0.00  
ATOM 33134 CG PRO 2214 67.293 76.325 94.566 0.00 0.00  
ATOM 33135 HG2 PRO 2214 67.275 76.715 95.583 0.00 0.00  
ATOM 33136 HG3 PRO 2214 66.356 75.829 94.313 0.00 0.00  
ATOM 33137 CB PRO 2214 68.533 75.522 94.113 0.00 0.00  
ATOM 33138 HB2 PRO 2214 68.745 74.779 94.882 0.00 0.00  
ATOM 33139 HB3 PRO 2214 68.375 74.951 93.199 0.00 0.00  
ATOM 33140 CA PRO 2214 69.558 76.567 93.853 0.00 0.00  
ATOM 33141 HA PRO 2214 70.006 76.723 94.834 0.00 0.00

|      |       |      |     |      |        |        |        |      |      |
|------|-------|------|-----|------|--------|--------|--------|------|------|
| ATOM | 33142 | C    | PRO | 2214 | 70.735 | 76.192 | 92.851 | 0.00 | 0.00 |
| ATOM | 33143 | O    | PRO | 2214 | 70.570 | 76.100 | 91.649 | 0.00 | 0.00 |
| ATOM | 33144 | N    | GLN | 2215 | 71.816 | 75.651 | 93.366 | 0.00 | 0.00 |
| ATOM | 33145 | H    | GLN | 2215 | 71.944 | 75.892 | 94.339 | 0.00 | 0.00 |
| ATOM | 33146 | CA   | GLN | 2215 | 72.943 | 75.252 | 92.547 | 0.00 | 0.00 |
| ATOM | 33147 | HA   | GLN | 2215 | 73.210 | 76.092 | 91.905 | 0.00 | 0.00 |
| ATOM | 33148 | CB   | GLN | 2215 | 74.214 | 74.857 | 93.410 | 0.00 | 0.00 |
| ATOM | 33149 | HB2  | GLN | 2215 | 74.014 | 74.071 | 94.137 | 0.00 | 0.00 |
| ATOM | 33150 | HB3  | GLN | 2215 | 74.948 | 74.320 | 92.810 | 0.00 | 0.00 |
| ATOM | 33151 | CG   | GLN | 2215 | 74.810 | 76.083 | 94.129 | 0.00 | 0.00 |
| ATOM | 33152 | HG2  | GLN | 2215 | 74.025 | 76.535 | 94.735 | 0.00 | 0.00 |
| ATOM | 33153 | HG3  | GLN | 2215 | 75.690 | 75.815 | 94.714 | 0.00 | 0.00 |
| ATOM | 33154 | CD   | GLN | 2215 | 75.203 | 77.162 | 93.115 | 0.00 | 0.00 |
| ATOM | 33155 | OE1  | GLN | 2215 | 75.810 | 76.848 | 92.069 | 0.00 | 0.00 |
| ATOM | 33156 | NE2  | GLN | 2215 | 74.994 | 78.432 | 93.325 | 0.00 | 0.00 |
| ATOM | 33157 | 1HE2 | GLN | 2215 | 75.363 | 79.175 | 92.749 | 0.00 | 0.00 |
| ATOM | 33158 | 2HE2 | GLN | 2215 | 74.294 | 78.730 | 93.989 | 0.00 | 0.00 |
| ATOM | 33159 | C    | GLN | 2215 | 72.616 | 73.979 | 91.656 | 0.00 | 0.00 |
| ATOM | 33160 | O    | GLN | 2215 | 71.918 | 73.034 | 92.052 | 0.00 | 0.00 |
| ATOM | 33161 | N    | PRO | 2216 | 73.188 | 73.797 | 90.457 | 0.00 | 0.00 |
| ATOM | 33162 | CD   | PRO | 2216 | 72.883 | 72.782 | 89.552 | 0.00 | 0.00 |
| ATOM | 33163 | HD2  | PRO | 2216 | 72.558 | 71.846 | 90.005 | 0.00 | 0.00 |
| ATOM | 33164 | HD3  | PRO | 2216 | 72.233 | 73.055 | 88.720 | 0.00 | 0.00 |
| ATOM | 33165 | CG   | PRO | 2216 | 74.260 | 72.457 | 89.085 | 0.00 | 0.00 |
| ATOM | 33166 | HG2  | PRO | 2216 | 74.734 | 71.914 | 89.903 | 0.00 | 0.00 |
| ATOM | 33167 | HG3  | PRO | 2216 | 74.147 | 71.874 | 88.171 | 0.00 | 0.00 |

|            |               |        |        |        |      |      |
|------------|---------------|--------|--------|--------|------|------|
| ATOM 33168 | CB PRO 2216   | 75.018 | 73.784 | 88.912 | 0.00 | 0.00 |
| ATOM 33169 | HB2 PRO 2216  | 76.059 | 73.637 | 89.198 | 0.00 | 0.00 |
| ATOM 33170 | HB3 PRO 2216  | 74.857 | 74.091 | 87.879 | 0.00 | 0.00 |
| ATOM 33171 | CA PRO 2216   | 74.277 | 74.634 | 89.917 | 0.00 | 0.00 |
| ATOM 33172 | HA PRO 2216   | 75.001 | 74.914 | 90.682 | 0.00 | 0.00 |
| ATOM 33173 | C PRO 2216    | 73.813 | 75.926 | 89.275 | 0.00 | 0.00 |
| ATOM 33174 | O PRO 2216    | 72.966 | 75.846 | 88.367 | 0.00 | 0.00 |
| ATOM 33175 | N VAL 2217    | 74.420 | 77.041 | 89.587 | 0.00 | 0.00 |
| ATOM 33176 | H VAL 2217    | 75.061 | 77.041 | 90.367 | 0.00 | 0.00 |
| ATOM 33177 | CA VAL 2217   | 74.321 | 78.312 | 88.925 | 0.00 | 0.00 |
| ATOM 33178 | HA VAL 2217   | 73.425 | 78.198 | 88.315 | 0.00 | 0.00 |
| ATOM 33179 | CB VAL 2217   | 74.131 | 79.485 | 89.987 | 0.00 | 0.00 |
| ATOM 33180 | HB VAL 2217   | 74.993 | 79.588 | 90.645 | 0.00 | 0.00 |
| ATOM 33181 | CG1 VAL 2217  | 73.863 | 80.737 | 89.150 | 0.00 | 0.00 |
| ATOM 33182 | 1HG1 VAL 2217 | 73.125 | 80.337 | 88.455 | 0.00 | 0.00 |
| ATOM 33183 | 2HG1 VAL 2217 | 73.617 | 81.695 | 89.607 | 0.00 | 0.00 |
| ATOM 33184 | 3HG1 VAL 2217 | 74.797 | 80.831 | 88.596 | 0.00 | 0.00 |
| ATOM 33185 | CG2 VAL 2217  | 72.970 | 79.408 | 91.017 | 0.00 | 0.00 |
| ATOM 33186 | 1HG2 VAL 2217 | 73.002 | 80.247 | 91.712 | 0.00 | 0.00 |
| ATOM 33187 | 2HG2 VAL 2217 | 71.951 | 79.338 | 90.637 | 0.00 | 0.00 |
| ATOM 33188 | 3HG2 VAL 2217 | 73.072 | 78.510 | 91.626 | 0.00 | 0.00 |
| ATOM 33189 | C VAL 2217    | 75.463 | 78.575 | 88.019 | 0.00 | 0.00 |
| ATOM 33190 | O VAL 2217    | 76.638 | 78.675 | 88.454 | 0.00 | 0.00 |
| ATOM 33191 | N HIE 2218    | 75.159 | 78.645 | 86.723 | 0.00 | 0.00 |
| ATOM 33192 | H HIE 2218    | 74.185 | 78.763 | 86.483 | 0.00 | 0.00 |
| ATOM 33193 | CA HIE 2218   | 76.051 | 79.085 | 85.612 | 0.00 | 0.00 |



|      |       |     |     |      |        |        |        |      |      |
|------|-------|-----|-----|------|--------|--------|--------|------|------|
| ATOM | 33194 | HA  | HIE | 2218 | 76.719 | 79.811 | 86.075 | 0.00 | 0.00 |
| ATOM | 33195 | CB  | HIE | 2218 | 76.790 | 77.846 | 84.981 | 0.00 | 0.00 |
| ATOM | 33196 | HB2 | HIE | 2218 | 77.334 | 78.172 | 84.094 | 0.00 | 0.00 |
| ATOM | 33197 | HB3 | HIE | 2218 | 77.481 | 77.496 | 85.749 | 0.00 | 0.00 |
| ATOM | 33198 | CG  | HIE | 2218 | 75.934 | 76.719 | 84.439 | 0.00 | 0.00 |
| ATOM | 33199 | ND1 | HIE | 2218 | 75.427 | 76.629 | 83.134 | 0.00 | 0.00 |
| ATOM | 33200 | CE1 | HIE | 2218 | 74.710 | 75.443 | 83.086 | 0.00 | 0.00 |
| ATOM | 33201 | HE1 | HIE | 2218 | 74.241 | 75.038 | 82.202 | 0.00 | 0.00 |
| ATOM | 33202 | NE2 | HIE | 2218 | 74.741 | 74.802 | 84.295 | 0.00 | 0.00 |
| ATOM | 33203 | HE2 | HIE | 2218 | 74.333 | 73.936 | 84.618 | 0.00 | 0.00 |
| ATOM | 33204 | CD2 | HIE | 2218 | 75.604 | 75.521 | 85.124 | 0.00 | 0.00 |
| ATOM | 33205 | HD2 | HIE | 2218 | 75.846 | 75.308 | 86.155 | 0.00 | 0.00 |
| ATOM | 33206 | C   | HIE | 2218 | 75.302 | 79.970 | 84.592 | 0.00 | 0.00 |
| ATOM | 33207 | O   | HIE | 2218 | 74.099 | 80.069 | 84.797 | 0.00 | 0.00 |
| ATOM | 33208 | N   | TYR | 2219 | 75.922 | 80.565 | 83.555 | 0.00 | 0.00 |
| ATOM | 33209 | H   | TYR | 2219 | 76.912 | 80.408 | 83.435 | 0.00 | 0.00 |
| ATOM | 33210 | CA  | TYR | 2219 | 75.231 | 81.399 | 82.591 | 0.00 | 0.00 |
| ATOM | 33211 | HA  | TYR | 2219 | 74.515 | 81.994 | 83.158 | 0.00 | 0.00 |
| ATOM | 33212 | CB  | TYR | 2219 | 76.260 | 82.261 | 81.964 | 0.00 | 0.00 |
| ATOM | 33213 | HB2 | TYR | 2219 | 77.095 | 81.697 | 81.546 | 0.00 | 0.00 |
| ATOM | 33214 | HB3 | TYR | 2219 | 75.627 | 82.704 | 81.195 | 0.00 | 0.00 |
| ATOM | 33215 | CG  | TYR | 2219 | 76.776 | 83.402 | 82.824 | 0.00 | 0.00 |
| ATOM | 33216 | CD1 | TYR | 2219 | 77.889 | 83.097 | 83.648 | 0.00 | 0.00 |
| ATOM | 33217 | HD1 | TYR | 2219 | 78.385 | 82.164 | 83.425 | 0.00 | 0.00 |
| ATOM | 33218 | CE1 | TYR | 2219 | 78.400 | 84.045 | 84.557 | 0.00 | 0.00 |
| ATOM | 33219 | HE1 | TYR | 2219 | 79.297 | 83.981 | 85.155 | 0.00 | 0.00 |

|      |       |     |     |      |        |        |        |      |      |
|------|-------|-----|-----|------|--------|--------|--------|------|------|
| ATOM | 33220 | CZ  | TYR | 2219 | 77.696 | 85.291 | 84.655 | 0.00 | 0.00 |
| ATOM | 33221 | OH  | TYR | 2219 | 78.077 | 86.271 | 85.586 | 0.00 | 0.00 |
| ATOM | 33222 | HH  | TYR | 2219 | 77.446 | 86.993 | 85.532 | 0.00 | 0.00 |
| ATOM | 33223 | CE2 | TYR | 2219 | 76.499 | 85.529 | 83.894 | 0.00 | 0.00 |
| ATOM | 33224 | HE2 | TYR | 2219 | 76.009 | 86.482 | 84.027 | 0.00 | 0.00 |
| ATOM | 33225 | CD2 | TYR | 2219 | 76.079 | 84.577 | 82.963 | 0.00 | 0.00 |
| ATOM | 33226 | HD2 | TYR | 2219 | 75.201 | 84.733 | 82.354 | 0.00 | 0.00 |
| ATOM | 33227 | C   | TYR | 2219 | 74.315 | 80.645 | 81.531 | 0.00 | 0.00 |
| ATOM | 33228 | O   | TYR | 2219 | 74.798 | 80.159 | 80.573 | 0.00 | 0.00 |
| ATOM | 33229 | N   | ARG | 2220 | 73.055 | 80.619 | 81.735 | 0.00 | 0.00 |
| ATOM | 33230 | H   | ARG | 2220 | 72.596 | 81.112 | 82.487 | 0.00 | 0.00 |
| ATOM | 33231 | CA  | ARG | 2220 | 72.113 | 80.010 | 80.733 | 0.00 | 0.00 |
| ATOM | 33232 | HA  | ARG | 2220 | 72.709 | 79.377 | 80.075 | 0.00 | 0.00 |
| ATOM | 33233 | CB  | ARG | 2220 | 71.061 | 79.191 | 81.518 | 0.00 | 0.00 |
| ATOM | 33234 | HB2 | ARG | 2220 | 70.376 | 79.870 | 82.025 | 0.00 | 0.00 |
| ATOM | 33235 | HB3 | ARG | 2220 | 70.490 | 78.557 | 80.839 | 0.00 | 0.00 |
| ATOM | 33236 | CG  | ARG | 2220 | 71.650 | 78.316 | 82.659 | 0.00 | 0.00 |
| ATOM | 33237 | HG2 | ARG | 2220 | 72.462 | 77.753 | 82.199 | 0.00 | 0.00 |
| ATOM | 33238 | HG3 | ARG | 2220 | 71.979 | 78.955 | 83.479 | 0.00 | 0.00 |
| ATOM | 33239 | CD  | ARG | 2220 | 70.630 | 77.418 | 83.432 | 0.00 | 0.00 |
| ATOM | 33240 | HD2 | ARG | 2220 | 70.328 | 76.602 | 82.774 | 0.00 | 0.00 |
| ATOM | 33241 | HD3 | ARG | 2220 | 69.716 | 77.926 | 83.740 | 0.00 | 0.00 |
| ATOM | 33242 | NE  | ARG | 2220 | 71.297 | 76.715 | 84.584 | 0.00 | 0.00 |
| ATOM | 33243 | HE  | ARG | 2220 | 71.761 | 77.328 | 85.240 | 0.00 | 0.00 |
| ATOM | 33244 | CZ  | ARG | 2220 | 71.482 | 75.438 | 84.850 | 0.00 | 0.00 |
| ATOM | 33245 | NH1 | ARG | 2220 | 71.884 | 75.024 | 85.988 | 0.00 | 0.00 |

|      |       |      |     |      |        |        |        |      |      |
|------|-------|------|-----|------|--------|--------|--------|------|------|
| ATOM | 33246 | 1HH1 | ARG | 2220 | 71.991 | 74.025 | 86.089 | 0.00 | 0.00 |
| ATOM | 33247 | 2HH1 | ARG | 2220 | 72.081 | 75.664 | 86.745 | 0.00 | 0.00 |
| ATOM | 33248 | NH2  | ARG | 2220 | 71.154 | 74.436 | 84.095 | 0.00 | 0.00 |
| ATOM | 33249 | 1HH2 | ARG | 2220 | 71.498 | 73.562 | 84.467 | 0.00 | 0.00 |
| ATOM | 33250 | 2HH2 | ARG | 2220 | 70.845 | 74.629 | 83.153 | 0.00 | 0.00 |
| ATOM | 33251 | C    | ARG | 2220 | 71.523 | 81.010 | 79.786 | 0.00 | 0.00 |
| ATOM | 33252 | O    | ARG | 2220 | 71.333 | 82.154 | 80.239 | 0.00 | 0.00 |
| ATOM | 33253 | N    | PRO | 2221 | 71.214 | 80.696 | 78.489 | 0.00 | 0.00 |
| ATOM | 33254 | CD   | PRO | 2221 | 71.613 | 79.495 | 77.779 | 0.00 | 0.00 |
| ATOM | 33255 | HD2  | PRO | 2221 | 71.498 | 78.532 | 78.277 | 0.00 | 0.00 |
| ATOM | 33256 | HD3  | PRO | 2221 | 72.660 | 79.602 | 77.495 | 0.00 | 0.00 |
| ATOM | 33257 | CG   | PRO | 2221 | 70.805 | 79.437 | 76.458 | 0.00 | 0.00 |
| ATOM | 33258 | HG2  | PRO | 2221 | 71.423 | 78.915 | 75.727 | 0.00 | 0.00 |
| ATOM | 33259 | HG3  | PRO | 2221 | 69.922 | 78.848 | 76.705 | 0.00 | 0.00 |
| ATOM | 33260 | CB   | PRO | 2221 | 70.536 | 80.924 | 76.142 | 0.00 | 0.00 |
| ATOM | 33261 | HB2  | PRO | 2221 | 71.434 | 81.263 | 75.625 | 0.00 | 0.00 |
| ATOM | 33262 | HB3  | PRO | 2221 | 69.603 | 80.958 | 75.579 | 0.00 | 0.00 |
| ATOM | 33263 | CA   | PRO | 2221 | 70.509 | 81.573 | 77.529 | 0.00 | 0.00 |
| ATOM | 33264 | HA   | PRO | 2221 | 71.082 | 82.499 | 77.483 | 0.00 | 0.00 |
| ATOM | 33265 | C    | PRO | 2221 | 69.128 | 81.806 | 77.991 | 0.00 | 0.00 |
| ATOM | 33266 | O    | PRO | 2221 | 68.515 | 80.997 | 78.596 | 0.00 | 0.00 |
| ATOM | 33267 | N    | MET | 2222 | 68.617 | 82.990 | 77.676 | 0.00 | 0.00 |
| ATOM | 33268 | H    | MET | 2222 | 69.164 | 83.574 | 77.059 | 0.00 | 0.00 |
| ATOM | 33269 | CA   | MET | 2222 | 67.373 | 83.638 | 78.057 | 0.00 | 0.00 |
| ATOM | 33270 | HA   | MET | 2222 | 66.736 | 82.858 | 78.475 | 0.00 | 0.00 |
| ATOM | 33271 | CB   | MET | 2222 | 67.597 | 84.794 | 79.050 | 0.00 | 0.00 |

|      |       |     |     |      |        |        |        |      |      |
|------|-------|-----|-----|------|--------|--------|--------|------|------|
| ATOM | 33272 | HB2 | MET | 2222 | 68.327 | 85.511 | 78.674 | 0.00 | 0.00 |
| ATOM | 33273 | HB3 | MET | 2222 | 66.665 | 85.312 | 79.278 | 0.00 | 0.00 |
| ATOM | 33274 | CG  | MET | 2222 | 68.054 | 84.123 | 80.351 | 0.00 | 0.00 |
| ATOM | 33275 | HG2 | MET | 2222 | 69.025 | 83.673 | 80.144 | 0.00 | 0.00 |
| ATOM | 33276 | HG3 | MET | 2222 | 68.313 | 84.854 | 81.117 | 0.00 | 0.00 |
| ATOM | 33277 | SD  | MET | 2222 | 66.950 | 82.923 | 81.201 | 0.00 | 0.00 |
| ATOM | 33278 | CE  | MET | 2222 | 68.215 | 81.863 | 81.880 | 0.00 | 0.00 |
| ATOM | 33279 | HE1 | MET | 2222 | 68.863 | 82.358 | 82.603 | 0.00 | 0.00 |
| ATOM | 33280 | HE2 | MET | 2222 | 67.637 | 81.044 | 82.310 | 0.00 | 0.00 |
| ATOM | 33281 | HE3 | MET | 2222 | 68.841 | 81.447 | 81.091 | 0.00 | 0.00 |
| ATOM | 33282 | C   | MET | 2222 | 66.715 | 84.117 | 76.774 | 0.00 | 0.00 |
| ATOM | 33283 | O   | MET | 2222 | 67.292 | 84.264 | 75.709 | 0.00 | 0.00 |
| ATOM | 33284 | N   | PHE | 2223 | 65.424 | 84.372 | 76.864 | 0.00 | 0.00 |
| ATOM | 33285 | H   | PHE | 2223 | 64.912 | 84.126 | 77.699 | 0.00 | 0.00 |
| ATOM | 33286 | CA  | PHE | 2223 | 64.526 | 84.534 | 75.723 | 0.00 | 0.00 |
| ATOM | 33287 | HA  | PHE | 2223 | 64.407 | 83.570 | 75.229 | 0.00 | 0.00 |
| ATOM | 33288 | CB  | PHE | 2223 | 63.176 | 84.923 | 76.205 | 0.00 | 0.00 |
| ATOM | 33289 | HB2 | PHE | 2223 | 63.225 | 85.825 | 76.815 | 0.00 | 0.00 |
| ATOM | 33290 | HB3 | PHE | 2223 | 62.437 | 85.119 | 75.428 | 0.00 | 0.00 |
| ATOM | 33291 | CG  | PHE | 2223 | 62.518 | 83.798 | 77.088 | 0.00 | 0.00 |
| ATOM | 33292 | CD1 | PHE | 2223 | 62.533 | 83.915 | 78.472 | 0.00 | 0.00 |
| ATOM | 33293 | HD1 | PHE | 2223 | 63.001 | 84.752 | 78.968 | 0.00 | 0.00 |
| ATOM | 33294 | CE1 | PHE | 2223 | 62.167 | 82.877 | 79.297 | 0.00 | 0.00 |
| ATOM | 33295 | HE1 | PHE | 2223 | 62.200 | 82.932 | 80.375 | 0.00 | 0.00 |
| ATOM | 33296 | CZ  | PHE | 2223 | 61.713 | 81.658 | 78.790 | 0.00 | 0.00 |
| ATOM | 33297 | HZ  | PHE | 2223 | 61.468 | 80.856 | 79.470 | 0.00 | 0.00 |

|      |       |     |     |      |        |        |        |      |      |
|------|-------|-----|-----|------|--------|--------|--------|------|------|
| ATOM | 33298 | CE2 | PHE | 2223 | 61.464 | 81.546 | 77.411 | 0.00 | 0.00 |
| ATOM | 33299 | HE2 | PHE | 2223 | 60.985 | 80.718 | 76.908 | 0.00 | 0.00 |
| ATOM | 33300 | CD2 | PHE | 2223 | 61.890 | 82.642 | 76.573 | 0.00 | 0.00 |
| ATOM | 33301 | HD2 | PHE | 2223 | 61.755 | 82.518 | 75.509 | 0.00 | 0.00 |
| ATOM | 33302 | C   | PHE | 2223 | 64.943 | 85.476 | 74.623 | 0.00 | 0.00 |
| ATOM | 33303 | O   | PHE | 2223 | 64.615 | 85.210 | 73.483 | 0.00 | 0.00 |
| ATOM | 33304 | N   | GLY | 2224 | 65.809 | 86.497 | 74.872 | 0.00 | 0.00 |
| ATOM | 33305 | H   | GLY | 2224 | 66.033 | 86.726 | 75.829 | 0.00 | 0.00 |
| ATOM | 33306 | CA  | GLY | 2224 | 66.506 | 87.258 | 73.762 | 0.00 | 0.00 |
| ATOM | 33307 | HA2 | GLY | 2224 | 65.813 | 87.689 | 73.039 | 0.00 | 0.00 |
| ATOM | 33308 | HA3 | GLY | 2224 | 66.899 | 88.219 | 74.096 | 0.00 | 0.00 |
| ATOM | 33309 | C   | GLY | 2224 | 67.512 | 86.576 | 72.846 | 0.00 | 0.00 |
| ATOM | 33310 | O   | GLY | 2224 | 67.976 | 87.182 | 71.867 | 0.00 | 0.00 |
| ATOM | 33311 | N   | ALA | 2225 | 67.895 | 85.361 | 73.156 | 0.00 | 0.00 |
| ATOM | 33312 | H   | ALA | 2225 | 67.426 | 84.897 | 73.921 | 0.00 | 0.00 |
| ATOM | 33313 | CA  | ALA | 2225 | 68.772 | 84.425 | 72.434 | 0.00 | 0.00 |
| ATOM | 33314 | HA  | ALA | 2225 | 69.270 | 84.976 | 71.636 | 0.00 | 0.00 |
| ATOM | 33315 | CB  | ALA | 2225 | 69.825 | 83.933 | 73.445 | 0.00 | 0.00 |
| ATOM | 33316 | HB1 | ALA | 2225 | 70.339 | 84.801 | 73.858 | 0.00 | 0.00 |
| ATOM | 33317 | HB2 | ALA | 2225 | 69.302 | 83.493 | 74.295 | 0.00 | 0.00 |
| ATOM | 33318 | HB3 | ALA | 2225 | 70.465 | 83.173 | 72.998 | 0.00 | 0.00 |
| ATOM | 33319 | C   | ALA | 2225 | 67.854 | 83.249 | 71.898 | 0.00 | 0.00 |
| ATOM | 33320 | O   | ALA | 2225 | 68.286 | 82.148 | 71.884 | 0.00 | 0.00 |
| ATOM | 33321 | N   | LEU | 2226 | 66.656 | 83.612 | 71.543 | 0.00 | 0.00 |
| ATOM | 33322 | H   | LEU | 2226 | 66.303 | 84.483 | 71.915 | 0.00 | 0.00 |
| ATOM | 33323 | CA  | LEU | 2226 | 65.715 | 82.527 | 71.113 | 0.00 | 0.00 |

|      |       |      |     |      |        |        |        |      |      |
|------|-------|------|-----|------|--------|--------|--------|------|------|
| ATOM | 33324 | HA   | LEU | 2226 | 66.305 | 81.675 | 70.773 | 0.00 | 0.00 |
| ATOM | 33325 | CB   | LEU | 2226 | 64.861 | 82.070 | 72.282 | 0.00 | 0.00 |
| ATOM | 33326 | HB2  | LEU | 2226 | 65.579 | 82.020 | 73.100 | 0.00 | 0.00 |
| ATOM | 33327 | HB3  | LEU | 2226 | 64.168 | 82.894 | 72.454 | 0.00 | 0.00 |
| ATOM | 33328 | CG   | LEU | 2226 | 64.108 | 80.771 | 72.120 | 0.00 | 0.00 |
| ATOM | 33329 | HG   | LEU | 2226 | 63.396 | 80.971 | 71.319 | 0.00 | 0.00 |
| ATOM | 33330 | CD1  | LEU | 2226 | 64.858 | 79.472 | 71.750 | 0.00 | 0.00 |
| ATOM | 33331 | 1HD1 | LEU | 2226 | 65.782 | 79.365 | 72.319 | 0.00 | 0.00 |
| ATOM | 33332 | 2HD1 | LEU | 2226 | 64.187 | 78.634 | 71.936 | 0.00 | 0.00 |
| ATOM | 33333 | 3HD1 | LEU | 2226 | 65.179 | 79.456 | 70.709 | 0.00 | 0.00 |
| ATOM | 33334 | CD2  | LEU | 2226 | 63.398 | 80.541 | 73.494 | 0.00 | 0.00 |
| ATOM | 33335 | 1HD2 | LEU | 2226 | 63.995 | 80.190 | 74.337 | 0.00 | 0.00 |
| ATOM | 33336 | 2HD2 | LEU | 2226 | 62.855 | 81.424 | 73.828 | 0.00 | 0.00 |
| ATOM | 33337 | 3HD2 | LEU | 2226 | 62.700 | 79.724 | 73.310 | 0.00 | 0.00 |
| ATOM | 33338 | C    | LEU | 2226 | 64.938 | 82.987 | 69.907 | 0.00 | 0.00 |
| ATOM | 33339 | O    | LEU | 2226 | 64.401 | 84.087 | 69.884 | 0.00 | 0.00 |
| ATOM | 33340 | N    | GLY | 2227 | 65.037 | 82.219 | 68.797 | 0.00 | 0.00 |
| ATOM | 33341 | H    | GLY | 2227 | 65.658 | 81.422 | 68.810 | 0.00 | 0.00 |
| ATOM | 33342 | CA   | GLY | 2227 | 64.192 | 82.352 | 67.658 | 0.00 | 0.00 |
| ATOM | 33343 | HA2  | GLY | 2227 | 64.632 | 81.712 | 66.893 | 0.00 | 0.00 |
| ATOM | 33344 | HA3  | GLY | 2227 | 63.200 | 81.935 | 67.828 | 0.00 | 0.00 |
| ATOM | 33345 | C    | GLY | 2227 | 64.051 | 83.807 | 67.020 | 0.00 | 0.00 |
| ATOM | 33346 | O    | GLY | 2227 | 64.982 | 84.537 | 66.651 | 0.00 | 0.00 |
| ATOM | 33347 | N    | SER | 2228 | 62.832 | 84.199 | 66.803 | 0.00 | 0.00 |
| ATOM | 33348 | H    | SER | 2228 | 62.038 | 83.666 | 67.128 | 0.00 | 0.00 |
| ATOM | 33349 | CA   | SER | 2228 | 62.464 | 85.570 | 66.362 | 0.00 | 0.00 |

|      |       |     |     |      |        |        |        |      |      |
|------|-------|-----|-----|------|--------|--------|--------|------|------|
| ATOM | 33350 | HA  | SER | 2228 | 63.241 | 85.866 | 65.657 | 0.00 | 0.00 |
| ATOM | 33351 | CB  | SER | 2228 | 61.088 | 85.592 | 65.692 | 0.00 | 0.00 |
| ATOM | 33352 | HB2 | SER | 2228 | 60.301 | 85.309 | 66.392 | 0.00 | 0.00 |
| ATOM | 33353 | HB3 | SER | 2228 | 60.872 | 86.594 | 65.322 | 0.00 | 0.00 |
| ATOM | 33354 | OG  | SER | 2228 | 61.079 | 84.688 | 64.620 | 0.00 | 0.00 |
| ATOM | 33355 | HG  | SER | 2228 | 60.350 | 84.971 | 64.064 | 0.00 | 0.00 |
| ATOM | 33356 | C   | SER | 2228 | 62.355 | 86.650 | 67.452 | 0.00 | 0.00 |
| ATOM | 33357 | O   | SER | 2228 | 62.355 | 87.810 | 67.139 | 0.00 | 0.00 |
| ATOM | 33358 | N   | ALA | 2229 | 62.407 | 86.217 | 68.761 | 0.00 | 0.00 |
| ATOM | 33359 | H   | ALA | 2229 | 62.517 | 85.215 | 68.819 | 0.00 | 0.00 |
| ATOM | 33360 | CA  | ALA | 2229 | 62.697 | 87.148 | 69.850 | 0.00 | 0.00 |
| ATOM | 33361 | HA  | ALA | 2229 | 62.053 | 88.022 | 69.751 | 0.00 | 0.00 |
| ATOM | 33362 | CB  | ALA | 2229 | 62.389 | 86.425 | 71.110 | 0.00 | 0.00 |
| ATOM | 33363 | HB1 | ALA | 2229 | 62.959 | 85.519 | 71.317 | 0.00 | 0.00 |
| ATOM | 33364 | HB2 | ALA | 2229 | 62.477 | 87.195 | 71.876 | 0.00 | 0.00 |
| ATOM | 33365 | HB3 | ALA | 2229 | 61.317 | 86.248 | 71.022 | 0.00 | 0.00 |
| ATOM | 33366 | C   | ALA | 2229 | 64.153 | 87.662 | 69.644 | 0.00 | 0.00 |
| ATOM | 33367 | O   | ALA | 2229 | 64.452 | 88.880 | 69.783 | 0.00 | 0.00 |
| ATOM | 33368 | N   | ARG | 2230 | 65.053 | 86.828 | 69.092 | 0.00 | 0.00 |
| ATOM | 33369 | H   | ARG | 2230 | 64.837 | 85.851 | 68.960 | 0.00 | 0.00 |
| ATOM | 33370 | CA  | ARG | 2230 | 66.487 | 87.162 | 68.895 | 0.00 | 0.00 |
| ATOM | 33371 | HA  | ARG | 2230 | 66.706 | 87.711 | 69.810 | 0.00 | 0.00 |
| ATOM | 33372 | CB  | ARG | 2230 | 67.408 | 85.939 | 68.931 | 0.00 | 0.00 |
| ATOM | 33373 | HB2 | ARG | 2230 | 67.445 | 85.652 | 69.982 | 0.00 | 0.00 |
| ATOM | 33374 | HB3 | ARG | 2230 | 67.060 | 85.069 | 68.374 | 0.00 | 0.00 |
| ATOM | 33375 | CG  | ARG | 2230 | 68.913 | 86.215 | 68.552 | 0.00 | 0.00 |

|      |       |      |     |      |        |        |        |      |      |
|------|-------|------|-----|------|--------|--------|--------|------|------|
| ATOM | 33376 | HG2  | ARG | 2230 | 69.271 | 86.920 | 69.302 | 0.00 | 0.00 |
| ATOM | 33377 | HG3  | ARG | 2230 | 69.046 | 86.631 | 67.553 | 0.00 | 0.00 |
| ATOM | 33378 | CD   | ARG | 2230 | 69.698 | 84.908 | 68.382 | 0.00 | 0.00 |
| ATOM | 33379 | HD2  | ARG | 2230 | 70.780 | 84.971 | 68.274 | 0.00 | 0.00 |
| ATOM | 33380 | HD3  | ARG | 2230 | 69.671 | 84.338 | 69.310 | 0.00 | 0.00 |
| ATOM | 33381 | NE   | ARG | 2230 | 69.400 | 84.281 | 67.102 | 0.00 | 0.00 |
| ATOM | 33382 | HE   | ARG | 2230 | 69.084 | 84.897 | 66.367 | 0.00 | 0.00 |
| ATOM | 33383 | CZ   | ARG | 2230 | 69.365 | 83.042 | 66.794 | 0.00 | 0.00 |
| ATOM | 33384 | NH1  | ARG | 2230 | 69.779 | 82.064 | 67.549 | 0.00 | 0.00 |
| ATOM | 33385 | 1HH1 | ARG | 2230 | 69.742 | 81.126 | 67.177 | 0.00 | 0.00 |
| ATOM | 33386 | 2HH1 | ARG | 2230 | 70.311 | 82.207 | 68.396 | 0.00 | 0.00 |
| ATOM | 33387 | NH2  | ARG | 2230 | 68.791 | 82.710 | 65.736 | 0.00 | 0.00 |
| ATOM | 33388 | 1HH2 | ARG | 2230 | 68.875 | 81.741 | 65.461 | 0.00 | 0.00 |
| ATOM | 33389 | 2HH2 | ARG | 2230 | 68.378 | 83.479 | 65.229 | 0.00 | 0.00 |
| ATOM | 33390 | C    | ARG | 2230 | 66.641 | 88.181 | 67.779 | 0.00 | 0.00 |
| ATOM | 33391 | O    | ARG | 2230 | 67.417 | 89.083 | 67.938 | 0.00 | 0.00 |
| ATOM | 33392 | N    | HIE | 2231 | 65.919 | 87.937 | 66.688 | 0.00 | 0.00 |
| ATOM | 33393 | H    | HIE | 2231 | 65.543 | 87.003 | 66.613 | 0.00 | 0.00 |
| ATOM | 33394 | CA   | HIE | 2231 | 65.739 | 88.916 | 65.576 | 0.00 | 0.00 |
| ATOM | 33395 | HA   | HIE | 2231 | 66.765 | 89.081 | 65.245 | 0.00 | 0.00 |
| ATOM | 33396 | CB   | HIE | 2231 | 64.811 | 88.384 | 64.523 | 0.00 | 0.00 |
| ATOM | 33397 | HB2  | HIE | 2231 | 63.996 | 87.931 | 65.088 | 0.00 | 0.00 |
| ATOM | 33398 | HB3  | HIE | 2231 | 64.375 | 89.171 | 63.908 | 0.00 | 0.00 |
| ATOM | 33399 | CG   | HIE | 2231 | 65.453 | 87.475 | 63.484 | 0.00 | 0.00 |
| ATOM | 33400 | ND1  | HIE | 2231 | 64.865 | 86.236 | 63.044 | 0.00 | 0.00 |
| ATOM | 33401 | CE1  | HIE | 2231 | 65.758 | 85.735 | 62.259 | 0.00 | 0.00 |



|      |       |     |     |      |        |        |        |      |      |
|------|-------|-----|-----|------|--------|--------|--------|------|------|
| ATOM | 33402 | HE1 | HIE | 2231 | 65.678 | 84.853 | 61.642 | 0.00 | 0.00 |
| ATOM | 33403 | NE2 | HIE | 2231 | 66.892 | 86.512 | 62.236 | 0.00 | 0.00 |
| ATOM | 33404 | HE2 | HIE | 2231 | 67.806 | 86.197 | 61.944 | 0.00 | 0.00 |
| ATOM | 33405 | CD2 | HIE | 2231 | 66.713 | 87.601 | 63.033 | 0.00 | 0.00 |
| ATOM | 33406 | HD2 | HIE | 2231 | 67.304 | 88.484 | 63.231 | 0.00 | 0.00 |
| ATOM | 33407 | C   | HIE | 2231 | 65.174 | 90.263 | 65.967 | 0.00 | 0.00 |
| ATOM | 33408 | O   | HIE | 2231 | 65.760 | 91.239 | 65.489 | 0.00 | 0.00 |
| ATOM | 33409 | N   | HIE | 2232 | 64.206 | 90.329 | 66.857 | 0.00 | 0.00 |
| ATOM | 33410 | H   | HIE | 2232 | 63.868 | 89.414 | 67.119 | 0.00 | 0.00 |
| ATOM | 33411 | CA  | HIE | 2232 | 63.516 | 91.527 | 67.353 | 0.00 | 0.00 |
| ATOM | 33412 | HA  | HIE | 2232 | 63.348 | 92.303 | 66.606 | 0.00 | 0.00 |
| ATOM | 33413 | CB  | HIE | 2232 | 62.079 | 91.204 | 67.813 | 0.00 | 0.00 |
| ATOM | 33414 | HB2 | HIE | 2232 | 61.710 | 90.412 | 67.162 | 0.00 | 0.00 |
| ATOM | 33415 | HB3 | HIE | 2232 | 62.023 | 90.996 | 68.882 | 0.00 | 0.00 |
| ATOM | 33416 | CG  | HIE | 2232 | 61.131 | 92.275 | 67.581 | 0.00 | 0.00 |
| ATOM | 33417 | ND1 | HIE | 2232 | 60.388 | 92.229 | 66.464 | 0.00 | 0.00 |
| ATOM | 33418 | CE1 | HIE | 2232 | 59.662 | 93.327 | 66.450 | 0.00 | 0.00 |
| ATOM | 33419 | HE1 | HIE | 2232 | 58.860 | 93.486 | 65.745 | 0.00 | 0.00 |
| ATOM | 33420 | NE2 | HIE | 2232 | 59.900 | 94.015 | 67.566 | 0.00 | 0.00 |
| ATOM | 33421 | HE2 | HIE | 2232 | 59.363 | 94.825 | 67.841 | 0.00 | 0.00 |
| ATOM | 33422 | CD2 | HIE | 2232 | 60.879 | 93.376 | 68.301 | 0.00 | 0.00 |
| ATOM | 33423 | HD2 | HIE | 2232 | 61.247 | 93.686 | 69.268 | 0.00 | 0.00 |
| ATOM | 33424 | C   | HIE | 2232 | 64.305 | 92.272 | 68.389 | 0.00 | 0.00 |
| ATOM | 33425 | O   | HIE | 2232 | 64.087 | 93.446 | 68.610 | 0.00 | 0.00 |
| ATOM | 33426 | N   | CYS | 2233 | 65.453 | 91.827 | 68.807 | 0.00 | 0.00 |
| ATOM | 33427 | H   | CYS | 2233 | 65.683 | 90.857 | 68.643 | 0.00 | 0.00 |

|      |       |     |     |      |        |        |        |      |      |
|------|-------|-----|-----|------|--------|--------|--------|------|------|
| ATOM | 33428 | CA  | CYS | 2233 | 66.307 | 92.383 | 69.887 | 0.00 | 0.00 |
| ATOM | 33429 | HA  | CYS | 2233 | 65.933 | 93.384 | 70.101 | 0.00 | 0.00 |
| ATOM | 33430 | CB  | CYS | 2233 | 66.091 | 91.653 | 71.125 | 0.00 | 0.00 |
| ATOM | 33431 | HB2 | CYS | 2233 | 66.093 | 90.566 | 71.047 | 0.00 | 0.00 |
| ATOM | 33432 | HB3 | CYS | 2233 | 66.869 | 91.991 | 71.809 | 0.00 | 0.00 |
| ATOM | 33433 | SG  | CYS | 2233 | 64.384 | 92.004 | 71.694 | 0.00 | 0.00 |
| ATOM | 33434 | HG  | CYS | 2233 | 64.725 | 92.895 | 72.630 | 0.00 | 0.00 |
| ATOM | 33435 | C   | CYS | 2233 | 67.829 | 92.585 | 69.559 | 0.00 | 0.00 |
| ATOM | 33436 | O   | CYS | 2233 | 68.557 | 93.088 | 70.425 | 0.00 | 0.00 |
| ATOM | 33437 | N   | ARG | 2234 | 68.204 | 92.211 | 68.328 | 0.00 | 0.00 |
| ATOM | 33438 | H   | ARG | 2234 | 67.602 | 91.603 | 67.791 | 0.00 | 0.00 |
| ATOM | 33439 | CA  | ARG | 2234 | 69.545 | 92.641 | 67.768 | 0.00 | 0.00 |
| ATOM | 33440 | HA  | ARG | 2234 | 70.218 | 92.970 | 68.560 | 0.00 | 0.00 |
| ATOM | 33441 | CB  | ARG | 2234 | 70.175 | 91.327 | 67.231 | 0.00 | 0.00 |
| ATOM | 33442 | HB2 | ARG | 2234 | 71.256 | 91.450 | 67.161 | 0.00 | 0.00 |
| ATOM | 33443 | HB3 | ARG | 2234 | 69.970 | 90.573 | 67.992 | 0.00 | 0.00 |
| ATOM | 33444 | CG  | ARG | 2234 | 69.805 | 90.756 | 65.811 | 0.00 | 0.00 |
| ATOM | 33445 | HG2 | ARG | 2234 | 68.730 | 90.622 | 65.686 | 0.00 | 0.00 |
| ATOM | 33446 | HG3 | ARG | 2234 | 70.212 | 91.451 | 65.077 | 0.00 | 0.00 |
| ATOM | 33447 | CD  | ARG | 2234 | 70.340 | 89.369 | 65.591 | 0.00 | 0.00 |
| ATOM | 33448 | HD2 | ARG | 2234 | 70.031 | 88.716 | 66.408 | 0.00 | 0.00 |
| ATOM | 33449 | HD3 | ARG | 2234 | 69.848 | 88.929 | 64.724 | 0.00 | 0.00 |
| ATOM | 33450 | NE  | ARG | 2234 | 71.755 | 89.458 | 65.487 | 0.00 | 0.00 |
| ATOM | 33451 | HE  | ARG | 2234 | 72.262 | 88.970 | 66.211 | 0.00 | 0.00 |
| ATOM | 33452 | CZ  | ARG | 2234 | 72.404 | 89.988 | 64.479 | 0.00 | 0.00 |
| ATOM | 33453 | NH1 | ARG | 2234 | 71.885 | 90.304 | 63.364 | 0.00 | 0.00 |

|      |       |      |     |      |        |        |        |      |      |
|------|-------|------|-----|------|--------|--------|--------|------|------|
| ATOM | 33454 | 1HH1 | ARG | 2234 | 72.439 | 90.853 | 62.722 | 0.00 | 0.00 |
| ATOM | 33455 | 2HH1 | ARG | 2234 | 70.882 | 90.298 | 63.246 | 0.00 | 0.00 |
| ATOM | 33456 | NH2  | ARG | 2234 | 73.685 | 90.101 | 64.598 | 0.00 | 0.00 |
| ATOM | 33457 | 1HH2 | ARG | 2234 | 74.241 | 90.428 | 63.821 | 0.00 | 0.00 |
| ATOM | 33458 | 2HH2 | ARG | 2234 | 74.105 | 90.010 | 65.512 | 0.00 | 0.00 |
| ATOM | 33459 | C    | ARG | 2234 | 69.540 | 93.640 | 66.629 | 0.00 | 0.00 |
| ATOM | 33460 | O    | ARG | 2234 | 68.554 | 93.705 | 65.878 | 0.00 | 0.00 |
| ATOM | 33461 | N    | LEU | 2235 | 70.649 | 94.338 | 66.452 | 0.00 | 0.00 |
| ATOM | 33462 | H    | LEU | 2235 | 71.460 | 94.192 | 67.036 | 0.00 | 0.00 |
| ATOM | 33463 | CA   | LEU | 2235 | 70.906 | 95.273 | 65.348 | 0.00 | 0.00 |
| ATOM | 33464 | HA   | LEU | 2235 | 70.041 | 95.401 | 64.697 | 0.00 | 0.00 |
| ATOM | 33465 | CB   | LEU | 2235 | 71.347 | 96.661 | 65.806 | 0.00 | 0.00 |
| ATOM | 33466 | HB2  | LEU | 2235 | 72.111 | 96.627 | 66.583 | 0.00 | 0.00 |
| ATOM | 33467 | HB3  | LEU | 2235 | 71.788 | 97.118 | 64.920 | 0.00 | 0.00 |
| ATOM | 33468 | CG   | LEU | 2235 | 70.242 | 97.576 | 66.338 | 0.00 | 0.00 |
| ATOM | 33469 | HG   | LEU | 2235 | 69.766 | 97.269 | 67.270 | 0.00 | 0.00 |
| ATOM | 33470 | CD1  | LEU | 2235 | 70.972 | 98.881 | 66.601 | 0.00 | 0.00 |
| ATOM | 33471 | 1HD1 | LEU | 2235 | 71.684 | 98.744 | 67.414 | 0.00 | 0.00 |
| ATOM | 33472 | 2HD1 | LEU | 2235 | 71.330 | 99.348 | 65.683 | 0.00 | 0.00 |
| ATOM | 33473 | 3HD1 | LEU | 2235 | 70.250 | 99.602 | 66.982 | 0.00 | 0.00 |
| ATOM | 33474 | CD2  | LEU | 2235 | 69.180 | 97.887 | 65.244 | 0.00 | 0.00 |
| ATOM | 33475 | 1HD2 | LEU | 2235 | 68.532 | 98.686 | 65.605 | 0.00 | 0.00 |
| ATOM | 33476 | 2HD2 | LEU | 2235 | 69.624 | 98.162 | 64.287 | 0.00 | 0.00 |
| ATOM | 33477 | 3HD2 | LEU | 2235 | 68.523 | 97.019 | 65.200 | 0.00 | 0.00 |
| ATOM | 33478 | C    | LEU | 2235 | 71.905 | 94.720 | 64.302 | 0.00 | 0.00 |
| ATOM | 33479 | O    | LEU | 2235 | 72.894 | 94.160 | 64.766 | 0.00 | 0.00 |

|      |       |      |     |      |        |        |        |      |      |
|------|-------|------|-----|------|--------|--------|--------|------|------|
| ATOM | 33480 | N    | THR | 2236 | 71.589 | 94.753 | 62.984 | 0.00 | 0.00 |
| ATOM | 33481 | H    | THR | 2236 | 70.703 | 95.166 | 62.727 | 0.00 | 0.00 |
| ATOM | 33482 | CA   | THR | 2236 | 72.672 | 94.511 | 61.966 | 0.00 | 0.00 |
| ATOM | 33483 | HA   | THR | 2236 | 73.573 | 94.072 | 62.395 | 0.00 | 0.00 |
| ATOM | 33484 | CB   | THR | 2236 | 72.124 | 93.682 | 60.883 | 0.00 | 0.00 |
| ATOM | 33485 | HB   | THR | 2236 | 71.281 | 94.258 | 60.501 | 0.00 | 0.00 |
| ATOM | 33486 | CG2  | THR | 2236 | 73.098 | 93.316 | 59.757 | 0.00 | 0.00 |
| ATOM | 33487 | 1HG2 | THR | 2236 | 72.521 | 92.799 | 58.990 | 0.00 | 0.00 |
| ATOM | 33488 | 2HG2 | THR | 2236 | 73.586 | 94.131 | 59.223 | 0.00 | 0.00 |
| ATOM | 33489 | 3HG2 | THR | 2236 | 73.990 | 92.779 | 60.080 | 0.00 | 0.00 |
| ATOM | 33490 | OG1  | THR | 2236 | 71.571 | 92.493 | 61.423 | 0.00 | 0.00 |
| ATOM | 33491 | HG1  | THR | 2236 | 71.051 | 92.081 | 60.728 | 0.00 | 0.00 |
| ATOM | 33492 | C    | THR | 2236 | 73.133 | 95.843 | 61.329 | 0.00 | 0.00 |
| ATOM | 33493 | O    | THR | 2236 | 72.266 | 96.568 | 60.847 | 0.00 | 0.00 |
| ATOM | 33494 | N    | PHE | 2237 | 74.443 | 96.194 | 61.569 | 0.00 | 0.00 |
| ATOM | 33495 | H    | PHE | 2237 | 75.096 | 95.470 | 61.834 | 0.00 | 0.00 |
| ATOM | 33496 | CA   | PHE | 2237 | 75.017 | 97.472 | 61.048 | 0.00 | 0.00 |
| ATOM | 33497 | HA   | PHE | 2237 | 74.185 | 98.160 | 61.205 | 0.00 | 0.00 |
| ATOM | 33498 | CB   | PHE | 2237 | 76.195 | 97.967 | 61.874 | 0.00 | 0.00 |
| ATOM | 33499 | HB2  | PHE | 2237 | 77.023 | 97.275 | 61.722 | 0.00 | 0.00 |
| ATOM | 33500 | HB3  | PHE | 2237 | 76.496 | 98.971 | 61.576 | 0.00 | 0.00 |
| ATOM | 33501 | CG   | PHE | 2237 | 75.800 | 98.231 | 63.360 | 0.00 | 0.00 |
| ATOM | 33502 | CD1  | PHE | 2237 | 76.488 | 97.634 | 64.403 | 0.00 | 0.00 |
| ATOM | 33503 | HD1  | PHE | 2237 | 77.268 | 96.900 | 64.267 | 0.00 | 0.00 |
| ATOM | 33504 | CE1  | PHE | 2237 | 76.028 | 97.830 | 65.735 | 0.00 | 0.00 |
| ATOM | 33505 | HE1  | PHE | 2237 | 76.476 | 97.224 | 66.509 | 0.00 | 0.00 |

|      |       |      |     |      |        |        |        |      |      |
|------|-------|------|-----|------|--------|--------|--------|------|------|
| ATOM | 33506 | CZ   | PHE | 2237 | 74.927 | 98.642 | 65.973 | 0.00 | 0.00 |
| ATOM | 33507 | HZ   | PHE | 2237 | 74.568 | 98.693 | 66.990 | 0.00 | 0.00 |
| ATOM | 33508 | CE2  | PHE | 2237 | 74.258 | 99.309 | 64.918 | 0.00 | 0.00 |
| ATOM | 33509 | HE2  | PHE | 2237 | 73.405 | 99.958 | 65.048 | 0.00 | 0.00 |
| ATOM | 33510 | CD2  | PHE | 2237 | 74.694 | 99.072 | 63.588 | 0.00 | 0.00 |
| ATOM | 33511 | HD2  | PHE | 2237 | 74.200 | 99.518 | 62.737 | 0.00 | 0.00 |
| ATOM | 33512 | C    | PHE | 2237 | 75.334 | 97.331 | 59.533 | 0.00 | 0.00 |
| ATOM | 33513 | O    | PHE | 2237 | 75.920 | 96.299 | 59.109 | 0.00 | 0.00 |
| ATOM | 33514 | N    | LEU | 2238 | 75.011 | 98.344 | 58.793 | 0.00 | 0.00 |
| ATOM | 33515 | H    | LEU | 2238 | 74.546 | 99.121 | 59.241 | 0.00 | 0.00 |
| ATOM | 33516 | CA   | LEU | 2238 | 74.974 | 98.253 | 57.338 | 0.00 | 0.00 |
| ATOM | 33517 | HA   | LEU | 2238 | 75.539 | 97.381 | 57.006 | 0.00 | 0.00 |
| ATOM | 33518 | CB   | LEU | 2238 | 73.462 | 98.177 | 57.000 | 0.00 | 0.00 |
| ATOM | 33519 | HB2  | LEU | 2238 | 72.914 | 98.785 | 57.720 | 0.00 | 0.00 |
| ATOM | 33520 | HB3  | LEU | 2238 | 73.378 | 98.575 | 55.988 | 0.00 | 0.00 |
| ATOM | 33521 | CG   | LEU | 2238 | 72.825 | 96.770 | 56.971 | 0.00 | 0.00 |
| ATOM | 33522 | HG   | LEU | 2238 | 72.627 | 96.504 | 58.009 | 0.00 | 0.00 |
| ATOM | 33523 | CD1  | LEU | 2238 | 71.463 | 96.892 | 56.264 | 0.00 | 0.00 |
| ATOM | 33524 | 1HD1 | LEU | 2238 | 71.424 | 97.514 | 55.370 | 0.00 | 0.00 |
| ATOM | 33525 | 2HD1 | LEU | 2238 | 71.078 | 95.926 | 55.938 | 0.00 | 0.00 |
| ATOM | 33526 | 3HD1 | LEU | 2238 | 70.707 | 97.344 | 56.907 | 0.00 | 0.00 |
| ATOM | 33527 | CD2  | LEU | 2238 | 73.732 | 95.617 | 56.352 | 0.00 | 0.00 |
| ATOM | 33528 | 1HD2 | LEU | 2238 | 74.637 | 95.382 | 56.912 | 0.00 | 0.00 |
| ATOM | 33529 | 2HD2 | LEU | 2238 | 73.134 | 94.724 | 56.532 | 0.00 | 0.00 |
| ATOM | 33530 | 3HD2 | LEU | 2238 | 74.056 | 95.796 | 55.327 | 0.00 | 0.00 |
| ATOM | 33531 | C    | LEU | 2238 | 75.603 | 99.569 | 56.781 | 0.00 | 0.00 |

|      |       |      |     |      |        |         |        |      |      |
|------|-------|------|-----|------|--------|---------|--------|------|------|
| ATOM | 33532 | O    | LEU | 2238 | 75.460 | 100.635 | 57.361 | 0.00 | 0.00 |
| ATOM | 33533 | N    | SER | 2239 | 76.271 | 99.552  | 55.611 | 0.00 | 0.00 |
| ATOM | 33534 | H    | SER | 2239 | 76.270 | 98.682  | 55.098 | 0.00 | 0.00 |
| ATOM | 33535 | CA   | SER | 2239 | 76.781 | 100.680 | 54.856 | 0.00 | 0.00 |
| ATOM | 33536 | HA   | SER | 2239 | 77.132 | 101.508 | 55.472 | 0.00 | 0.00 |
| ATOM | 33537 | CB   | SER | 2239 | 78.001 | 100.334 | 54.000 | 0.00 | 0.00 |
| ATOM | 33538 | HB2  | SER | 2239 | 78.626 | 101.177 | 53.708 | 0.00 | 0.00 |
| ATOM | 33539 | HB3  | SER | 2239 | 78.626 | 99.660  | 54.585 | 0.00 | 0.00 |
| ATOM | 33540 | OG   | SER | 2239 | 77.623 | 99.677  | 52.939 | 0.00 | 0.00 |
| ATOM | 33541 | HG   | SER | 2239 | 78.178 | 99.071  | 52.443 | 0.00 | 0.00 |
| ATOM | 33542 | C    | SER | 2239 | 75.726 | 101.329 | 53.998 | 0.00 | 0.00 |
| ATOM | 33543 | O    | SER | 2239 | 74.746 | 100.703 | 53.624 | 0.00 | 0.00 |
| ATOM | 33544 | N    | GLN | 2240 | 75.851 | 102.665 | 53.674 | 0.00 | 0.00 |
| ATOM | 33545 | H    | GLN | 2240 | 76.688 | 103.063 | 54.075 | 0.00 | 0.00 |
| ATOM | 33546 | CA   | GLN | 2240 | 74.933 | 103.551 | 52.885 | 0.00 | 0.00 |
| ATOM | 33547 | HA   | GLN | 2240 | 73.923 | 103.447 | 53.281 | 0.00 | 0.00 |
| ATOM | 33548 | CB   | GLN | 2240 | 75.375 | 105.024 | 52.869 | 0.00 | 0.00 |
| ATOM | 33549 | HB2  | GLN | 2240 | 76.447 | 105.119 | 52.695 | 0.00 | 0.00 |
| ATOM | 33550 | HB3  | GLN | 2240 | 74.841 | 105.561 | 52.084 | 0.00 | 0.00 |
| ATOM | 33551 | CG   | GLN | 2240 | 75.092 | 105.594 | 54.268 | 0.00 | 0.00 |
| ATOM | 33552 | HG2  | GLN | 2240 | 74.024 | 105.727 | 54.439 | 0.00 | 0.00 |
| ATOM | 33553 | HG3  | GLN | 2240 | 75.502 | 104.906 | 55.008 | 0.00 | 0.00 |
| ATOM | 33554 | CD   | GLN | 2240 | 75.825 | 106.932 | 54.544 | 0.00 | 0.00 |
| ATOM | 33555 | OE1  | GLN | 2240 | 76.015 | 107.688 | 53.563 | 0.00 | 0.00 |
| ATOM | 33556 | NE2  | GLN | 2240 | 76.309 | 107.259 | 55.654 | 0.00 | 0.00 |
| ATOM | 33557 | 1HE2 | GLN | 2240 | 77.180 | 107.768 | 55.703 | 0.00 | 0.00 |

|      |       |      |     |      |        |         |        |      |      |
|------|-------|------|-----|------|--------|---------|--------|------|------|
| ATOM | 33558 | 2HE2 | GLN | 2240 | 76.074 | 106.663 | 56.435 | 0.00 | 0.00 |
| ATOM | 33559 | C    | GLN | 2240 | 74.790 | 103.014 | 51.421 | 0.00 | 0.00 |
| ATOM | 33560 | O    | GLN | 2240 | 73.648 | 102.990 | 50.935 | 0.00 | 0.00 |
| ATOM | 33561 | N    | ALA | 2241 | 75.910 | 102.616 | 50.849 | 0.00 | 0.00 |
| ATOM | 33562 | H    | ALA | 2241 | 76.770 | 102.754 | 51.360 | 0.00 | 0.00 |
| ATOM | 33563 | CA   | ALA | 2241 | 76.035 | 101.935 | 49.533 | 0.00 | 0.00 |
| ATOM | 33564 | HA   | ALA | 2241 | 75.315 | 102.431 | 48.882 | 0.00 | 0.00 |
| ATOM | 33565 | CB   | ALA | 2241 | 77.384 | 101.870 | 48.879 | 0.00 | 0.00 |
| ATOM | 33566 | HB1  | ALA | 2241 | 77.363 | 101.288 | 47.958 | 0.00 | 0.00 |
| ATOM | 33567 | HB2  | ALA | 2241 | 77.671 | 102.864 | 48.537 | 0.00 | 0.00 |
| ATOM | 33568 | HB3  | ALA | 2241 | 78.066 | 101.558 | 49.670 | 0.00 | 0.00 |
| ATOM | 33569 | C    | ALA | 2241 | 75.320 | 100.550 | 49.497 | 0.00 | 0.00 |
| ATOM | 33570 | O    | ALA | 2241 | 74.576 | 100.286 | 48.554 | 0.00 | 0.00 |
| ATOM | 33571 | N    | ALA | 2242 | 75.435 | 99.770  | 50.534 | 0.00 | 0.00 |
| ATOM | 33572 | H    | ALA | 2242 | 75.857 | 100.129 | 51.379 | 0.00 | 0.00 |
| ATOM | 33573 | CA   | ALA | 2242 | 74.687 | 98.471  | 50.683 | 0.00 | 0.00 |
| ATOM | 33574 | HA   | ALA | 2242 | 74.729 | 97.820  | 49.809 | 0.00 | 0.00 |
| ATOM | 33575 | CB   | ALA | 2242 | 75.328 | 97.631  | 51.860 | 0.00 | 0.00 |
| ATOM | 33576 | HB1  | ALA | 2242 | 76.120 | 97.013  | 51.435 | 0.00 | 0.00 |
| ATOM | 33577 | HB2  | ALA | 2242 | 75.672 | 98.388  | 52.565 | 0.00 | 0.00 |
| ATOM | 33578 | HB3  | ALA | 2242 | 74.488 | 97.099  | 52.307 | 0.00 | 0.00 |
| ATOM | 33579 | C    | ALA | 2242 | 73.247 | 98.631  | 50.998 | 0.00 | 0.00 |
| ATOM | 33580 | O    | ALA | 2242 | 72.411 | 97.868  | 50.434 | 0.00 | 0.00 |
| ATOM | 33581 | N    | ALA | 2243 | 72.789 | 99.668  | 51.745 | 0.00 | 0.00 |
| ATOM | 33582 | H    | ALA | 2243 | 73.481 | 100.196 | 52.256 | 0.00 | 0.00 |
| ATOM | 33583 | CA   | ALA | 2243 | 71.333 | 99.991  | 51.836 | 0.00 | 0.00 |

|      |       |     |     |      |        |         |        |      |      |
|------|-------|-----|-----|------|--------|---------|--------|------|------|
| ATOM | 33584 | HA  | ALA | 2243 | 70.928 | 99.016  | 52.108 | 0.00 | 0.00 |
| ATOM | 33585 | CB  | ALA | 2243 | 71.093 | 101.035 | 52.951 | 0.00 | 0.00 |
| ATOM | 33586 | HB1 | ALA | 2243 | 71.573 | 100.747 | 53.886 | 0.00 | 0.00 |
| ATOM | 33587 | HB2 | ALA | 2243 | 71.568 | 101.974 | 52.667 | 0.00 | 0.00 |
| ATOM | 33588 | HB3 | ALA | 2243 | 70.027 | 101.150 | 53.150 | 0.00 | 0.00 |
| ATOM | 33589 | C   | ALA | 2243 | 70.720 | 100.507 | 50.543 | 0.00 | 0.00 |
| ATOM | 33590 | O   | ALA | 2243 | 69.641 | 100.079 | 50.178 | 0.00 | 0.00 |
| ATOM | 33591 | N   | ALA | 2244 | 71.468 | 101.331 | 49.844 | 0.00 | 0.00 |
| ATOM | 33592 | H   | ALA | 2244 | 72.270 | 101.780 | 50.262 | 0.00 | 0.00 |
| ATOM | 33593 | CA  | ALA | 2244 | 71.157 | 101.906 | 48.570 | 0.00 | 0.00 |
| ATOM | 33594 | HA  | ALA | 2244 | 70.290 | 102.527 | 48.795 | 0.00 | 0.00 |
| ATOM | 33595 | CB  | ALA | 2244 | 72.268 | 102.834 | 48.005 | 0.00 | 0.00 |
| ATOM | 33596 | HB1 | ALA | 2244 | 73.227 | 102.316 | 47.966 | 0.00 | 0.00 |
| ATOM | 33597 | HB2 | ALA | 2244 | 71.934 | 103.257 | 47.058 | 0.00 | 0.00 |
| ATOM | 33598 | HB3 | ALA | 2244 | 72.426 | 103.682 | 48.671 | 0.00 | 0.00 |
| ATOM | 33599 | C   | ALA | 2244 | 70.817 | 100.858 | 47.550 | 0.00 | 0.00 |
| ATOM | 33600 | O   | ALA | 2244 | 69.808 | 100.961 | 46.917 | 0.00 | 0.00 |
| ATOM | 33601 | N   | ASN | 2245 | 71.679 | 99.827  | 47.417 | 0.00 | 0.00 |
| ATOM | 33602 | H   | ASN | 2245 | 72.516 | 99.905  | 47.976 | 0.00 | 0.00 |
| ATOM | 33603 | CA  | ASN | 2245 | 71.470 | 98.627  | 46.520 | 0.00 | 0.00 |
| ATOM | 33604 | HA  | ASN | 2245 | 71.171 | 99.015  | 45.546 | 0.00 | 0.00 |
| ATOM | 33605 | CB  | ASN | 2245 | 72.849 | 97.905  | 46.413 | 0.00 | 0.00 |
| ATOM | 33606 | HB2 | ASN | 2245 | 73.599 | 98.571  | 45.987 | 0.00 | 0.00 |
| ATOM | 33607 | HB3 | ASN | 2245 | 73.163 | 97.599  | 47.410 | 0.00 | 0.00 |
| ATOM | 33608 | CG  | ASN | 2245 | 72.707 | 96.555  | 45.592 | 0.00 | 0.00 |
| ATOM | 33609 | OD1 | ASN | 2245 | 72.623 | 95.510  | 46.183 | 0.00 | 0.00 |



|      |       |      |     |      |        |        |        |      |      |
|------|-------|------|-----|------|--------|--------|--------|------|------|
| ATOM | 33610 | ND2  | ASN | 2245 | 72.517 | 96.648 | 44.308 | 0.00 | 0.00 |
| ATOM | 33611 | 1HD2 | ASN | 2245 | 72.559 | 95.787 | 43.781 | 0.00 | 0.00 |
| ATOM | 33612 | 2HD2 | ASN | 2245 | 72.417 | 97.565 | 43.899 | 0.00 | 0.00 |
| ATOM | 33613 | C    | ASN | 2245 | 70.386 | 97.661 | 47.085 | 0.00 | 0.00 |
| ATOM | 33614 | O    | ASN | 2245 | 69.523 | 97.066 | 46.396 | 0.00 | 0.00 |
| ATOM | 33615 | N    | GLY | 2246 | 70.310 | 97.604 | 48.426 | 0.00 | 0.00 |
| ATOM | 33616 | H    | GLY | 2246 | 70.845 | 98.265 | 48.971 | 0.00 | 0.00 |
| ATOM | 33617 | CA   | GLY | 2246 | 69.111 | 97.117 | 49.101 | 0.00 | 0.00 |
| ATOM | 33618 | HA2  | GLY | 2246 | 68.946 | 97.614 | 50.057 | 0.00 | 0.00 |
| ATOM | 33619 | HA3  | GLY | 2246 | 68.248 | 97.093 | 48.435 | 0.00 | 0.00 |
| ATOM | 33620 | C    | GLY | 2246 | 69.339 | 95.668 | 49.540 | 0.00 | 0.00 |
| ATOM | 33621 | O    | GLY | 2246 | 68.490 | 94.841 | 49.330 | 0.00 | 0.00 |
| ATOM | 33622 | N    | VAL | 2247 | 70.482 | 95.371 | 50.179 | 0.00 | 0.00 |
| ATOM | 33623 | H    | VAL | 2247 | 71.216 | 96.062 | 50.254 | 0.00 | 0.00 |
| ATOM | 33624 | CA   | VAL | 2247 | 70.984 | 94.015 | 50.491 | 0.00 | 0.00 |
| ATOM | 33625 | HA   | VAL | 2247 | 70.896 | 93.434 | 49.573 | 0.00 | 0.00 |
| ATOM | 33626 | CB   | VAL | 2247 | 72.461 | 94.049 | 51.130 | 0.00 | 0.00 |
| ATOM | 33627 | HB   | VAL | 2247 | 72.607 | 92.975 | 51.247 | 0.00 | 0.00 |
| ATOM | 33628 | CG1  | VAL | 2247 | 73.536 | 94.528 | 50.207 | 0.00 | 0.00 |
| ATOM | 33629 | 1HG1 | VAL | 2247 | 73.322 | 95.560 | 49.928 | 0.00 | 0.00 |
| ATOM | 33630 | 2HG1 | VAL | 2247 | 74.573 | 94.500 | 50.543 | 0.00 | 0.00 |
| ATOM | 33631 | 3HG1 | VAL | 2247 | 73.625 | 93.881 | 49.335 | 0.00 | 0.00 |
| ATOM | 33632 | CG2  | VAL | 2247 | 72.690 | 94.758 | 52.489 | 0.00 | 0.00 |
| ATOM | 33633 | 1HG2 | VAL | 2247 | 72.484 | 95.828 | 52.521 | 0.00 | 0.00 |
| ATOM | 33634 | 2HG2 | VAL | 2247 | 71.986 | 94.310 | 53.190 | 0.00 | 0.00 |
| ATOM | 33635 | 3HG2 | VAL | 2247 | 73.721 | 94.715 | 52.841 | 0.00 | 0.00 |

|      |       |     |     |      |        |        |        |      |      |
|------|-------|-----|-----|------|--------|--------|--------|------|------|
| ATOM | 33636 | C   | VAL | 2247 | 70.125 | 93.204 | 51.500 | 0.00 | 0.00 |
| ATOM | 33637 | O   | VAL | 2247 | 70.023 | 92.052 | 51.474 | 0.00 | 0.00 |
| ATOM | 33638 | N   | ALA | 2248 | 69.466 | 93.913 | 52.498 | 0.00 | 0.00 |
| ATOM | 33639 | H   | ALA | 2248 | 69.725 | 94.879 | 52.636 | 0.00 | 0.00 |
| ATOM | 33640 | CA  | ALA | 2248 | 68.680 | 93.297 | 53.575 | 0.00 | 0.00 |
| ATOM | 33641 | HA  | ALA | 2248 | 69.216 | 92.466 | 54.033 | 0.00 | 0.00 |
| ATOM | 33642 | CB  | ALA | 2248 | 68.447 | 94.364 | 54.579 | 0.00 | 0.00 |
| ATOM | 33643 | HB1 | ALA | 2248 | 67.710 | 95.099 | 54.256 | 0.00 | 0.00 |
| ATOM | 33644 | HB2 | ALA | 2248 | 67.945 | 93.989 | 55.472 | 0.00 | 0.00 |
| ATOM | 33645 | HB3 | ALA | 2248 | 69.393 | 94.788 | 54.913 | 0.00 | 0.00 |
| ATOM | 33646 | C   | ALA | 2248 | 67.381 | 92.721 | 52.931 | 0.00 | 0.00 |
| ATOM | 33647 | O   | ALA | 2248 | 66.941 | 91.706 | 53.418 | 0.00 | 0.00 |
| ATOM | 33648 | N   | GLU | 2249 | 66.854 | 93.257 | 51.858 | 0.00 | 0.00 |
| ATOM | 33649 | H   | GLU | 2249 | 67.334 | 94.081 | 51.527 | 0.00 | 0.00 |
| ATOM | 33650 | CA  | GLU | 2249 | 65.775 | 92.624 | 51.046 | 0.00 | 0.00 |
| ATOM | 33651 | HA  | GLU | 2249 | 65.013 | 92.286 | 51.749 | 0.00 | 0.00 |
| ATOM | 33652 | CB  | GLU | 2249 | 65.026 | 93.632 | 50.118 | 0.00 | 0.00 |
| ATOM | 33653 | HB2 | GLU | 2249 | 64.679 | 94.496 | 50.685 | 0.00 | 0.00 |
| ATOM | 33654 | HB3 | GLU | 2249 | 65.717 | 93.970 | 49.346 | 0.00 | 0.00 |
| ATOM | 33655 | CG  | GLU | 2249 | 63.839 | 93.041 | 49.311 | 0.00 | 0.00 |
| ATOM | 33656 | HG2 | GLU | 2249 | 64.079 | 92.037 | 48.961 | 0.00 | 0.00 |
| ATOM | 33657 | HG3 | GLU | 2249 | 62.919 | 92.992 | 49.893 | 0.00 | 0.00 |
| ATOM | 33658 | CD  | GLU | 2249 | 63.561 | 93.885 | 48.053 | 0.00 | 0.00 |
| ATOM | 33659 | OE1 | GLU | 2249 | 63.713 | 95.128 | 48.132 | 0.00 | 0.00 |
| ATOM | 33660 | OE2 | GLU | 2249 | 63.197 | 93.377 | 46.996 | 0.00 | 0.00 |
| ATOM | 33661 | C   | GLU | 2249 | 66.166 | 91.416 | 50.129 | 0.00 | 0.00 |

|      |       |      |     |      |        |        |        |      |      |
|------|-------|------|-----|------|--------|--------|--------|------|------|
| ATOM | 33662 | O    | GLU | 2249 | 65.548 | 90.392 | 50.029 | 0.00 | 0.00 |
| ATOM | 33663 | N    | ARG | 2250 | 67.339 | 91.508 | 49.507 | 0.00 | 0.00 |
| ATOM | 33664 | H    | ARG | 2250 | 67.866 | 92.344 | 49.717 | 0.00 | 0.00 |
| ATOM | 33665 | CA   | ARG | 2250 | 67.904 | 90.559 | 48.589 | 0.00 | 0.00 |
| ATOM | 33666 | HA   | ARG | 2250 | 67.145 | 90.458 | 47.812 | 0.00 | 0.00 |
| ATOM | 33667 | CB   | ARG | 2250 | 69.170 | 90.963 | 47.877 | 0.00 | 0.00 |
| ATOM | 33668 | HB2  | ARG | 2250 | 69.010 | 91.812 | 47.212 | 0.00 | 0.00 |
| ATOM | 33669 | HB3  | ARG | 2250 | 69.822 | 91.398 | 48.634 | 0.00 | 0.00 |
| ATOM | 33670 | CG   | ARG | 2250 | 69.831 | 89.766 | 47.214 | 0.00 | 0.00 |
| ATOM | 33671 | HG2  | ARG | 2250 | 70.388 | 89.209 | 47.967 | 0.00 | 0.00 |
| ATOM | 33672 | HG3  | ARG | 2250 | 69.142 | 89.075 | 46.728 | 0.00 | 0.00 |
| ATOM | 33673 | CD   | ARG | 2250 | 70.809 | 90.145 | 46.043 | 0.00 | 0.00 |
| ATOM | 33674 | HD2  | ARG | 2250 | 71.120 | 89.243 | 45.516 | 0.00 | 0.00 |
| ATOM | 33675 | HD3  | ARG | 2250 | 70.216 | 90.762 | 45.369 | 0.00 | 0.00 |
| ATOM | 33676 | NE   | ARG | 2250 | 72.062 | 90.873 | 46.368 | 0.00 | 0.00 |
| ATOM | 33677 | HE   | ARG | 2250 | 72.899 | 90.393 | 46.666 | 0.00 | 0.00 |
| ATOM | 33678 | CZ   | ARG | 2250 | 72.298 | 92.195 | 46.305 | 0.00 | 0.00 |
| ATOM | 33679 | NH1  | ARG | 2250 | 73.481 | 92.750 | 46.580 | 0.00 | 0.00 |
| ATOM | 33680 | 1HH1 | ARG | 2250 | 73.633 | 93.748 | 46.530 | 0.00 | 0.00 |
| ATOM | 33681 | 2HH1 | ARG | 2250 | 74.276 | 92.132 | 46.500 | 0.00 | 0.00 |
| ATOM | 33682 | NH2  | ARG | 2250 | 71.361 | 92.987 | 45.987 | 0.00 | 0.00 |
| ATOM | 33683 | 1HH2 | ARG | 2250 | 71.717 | 93.932 | 45.977 | 0.00 | 0.00 |
| ATOM | 33684 | 2HH2 | ARG | 2250 | 70.550 | 92.780 | 45.423 | 0.00 | 0.00 |
| ATOM | 33685 | C    | ARG | 2250 | 68.052 | 89.193 | 49.305 | 0.00 | 0.00 |
| ATOM | 33686 | O    | ARG | 2250 | 67.759 | 88.095 | 48.775 | 0.00 | 0.00 |
| ATOM | 33687 | N    | LEU | 2251 | 68.632 | 89.286 | 50.466 | 0.00 | 0.00 |

|            |      |     |      |        |        |        |      |      |
|------------|------|-----|------|--------|--------|--------|------|------|
| ATOM 33688 | H    | LEU | 2251 | 68.947 | 90.175 | 50.827 | 0.00 | 0.00 |
| ATOM 33689 | CA   | LEU | 2251 | 68.914 | 88.175 | 51.286 | 0.00 | 0.00 |
| ATOM 33690 | HA   | LEU | 2251 | 68.924 | 87.339 | 50.586 | 0.00 | 0.00 |
| ATOM 33691 | CB   | LEU | 2251 | 70.288 | 88.344 | 51.937 | 0.00 | 0.00 |
| ATOM 33692 | HB2  | LEU | 2251 | 70.159 | 89.200 | 52.600 | 0.00 | 0.00 |
| ATOM 33693 | HB3  | LEU | 2251 | 70.502 | 87.516 | 52.614 | 0.00 | 0.00 |
| ATOM 33694 | CG   | LEU | 2251 | 71.483 | 88.587 | 50.946 | 0.00 | 0.00 |
| ATOM 33695 | HG   | LEU | 2251 | 71.151 | 89.310 | 50.200 | 0.00 | 0.00 |
| ATOM 33696 | CD1  | LEU | 2251 | 72.706 | 89.203 | 51.601 | 0.00 | 0.00 |
| ATOM 33697 | 1HD1 | LEU | 2251 | 73.492 | 89.451 | 50.887 | 0.00 | 0.00 |
| ATOM 33698 | 2HD1 | LEU | 2251 | 72.514 | 90.181 | 52.041 | 0.00 | 0.00 |
| ATOM 33699 | 3HD1 | LEU | 2251 | 73.028 | 88.559 | 52.419 | 0.00 | 0.00 |
| ATOM 33700 | CD2  | LEU | 2251 | 71.933 | 87.328 | 50.172 | 0.00 | 0.00 |
| ATOM 33701 | 1HD2 | LEU | 2251 | 72.691 | 87.704 | 49.484 | 0.00 | 0.00 |
| ATOM 33702 | 2HD2 | LEU | 2251 | 72.482 | 86.652 | 50.827 | 0.00 | 0.00 |
| ATOM 33703 | 3HD2 | LEU | 2251 | 71.098 | 86.760 | 49.762 | 0.00 | 0.00 |
| ATOM 33704 | C    | LEU | 2251 | 67.754 | 87.880 | 52.268 | 0.00 | 0.00 |
| ATOM 33705 | O    | LEU | 2251 | 67.809 | 86.888 | 52.932 | 0.00 | 0.00 |
| ATOM 33706 | N    | ASN | 2252 | 66.685 | 88.662 | 52.242 | 0.00 | 0.00 |
| ATOM 33707 | H    | ASN | 2252 | 66.687 | 89.485 | 51.656 | 0.00 | 0.00 |
| ATOM 33708 | CA   | ASN | 2252 | 65.620 | 88.491 | 53.215 | 0.00 | 0.00 |
| ATOM 33709 | HA   | ASN | 2252 | 65.012 | 89.396 | 53.234 | 0.00 | 0.00 |
| ATOM 33710 | CB   | ASN | 2252 | 64.750 | 87.314 | 52.716 | 0.00 | 0.00 |
| ATOM 33711 | HB2  | ASN | 2252 | 65.268 | 86.355 | 52.721 | 0.00 | 0.00 |
| ATOM 33712 | HB3  | ASN | 2252 | 64.433 | 87.580 | 51.707 | 0.00 | 0.00 |
| ATOM 33713 | CG   | ASN | 2252 | 63.454 | 87.069 | 53.410 | 0.00 | 0.00 |

|            |               |        |        |        |      |      |
|------------|---------------|--------|--------|--------|------|------|
| ATOM 33714 | OD1 ASN 2252  | 63.295 | 86.121 | 54.141 | 0.00 | 0.00 |
| ATOM 33715 | ND2 ASN 2252  | 62.483 | 87.870 | 53.168 | 0.00 | 0.00 |
| ATOM 33716 | 1HD2 ASN 2252 | 61.642 | 87.614 | 53.666 | 0.00 | 0.00 |
| ATOM 33717 | 2HD2 ASN 2252 | 62.602 | 88.797 | 52.784 | 0.00 | 0.00 |
| ATOM 33718 | C ASN 2252    | 66.094 | 88.383 | 54.698 | 0.00 | 0.00 |
| ATOM 33719 | O ASN 2252    | 65.475 | 87.625 | 55.448 | 0.00 | 0.00 |
| ATOM 33720 | N LEU 2253    | 67.047 | 89.173 | 55.086 | 0.00 | 0.00 |
| ATOM 33721 | H LEU 2253    | 67.385 | 89.892 | 54.462 | 0.00 | 0.00 |
| ATOM 33722 | CA LEU 2253   | 67.463 | 89.167 | 56.435 | 0.00 | 0.00 |
| ATOM 33723 | HA LEU 2253   | 67.796 | 88.171 | 56.728 | 0.00 | 0.00 |
| ATOM 33724 | CB LEU 2253   | 68.775 | 89.941 | 56.624 | 0.00 | 0.00 |
| ATOM 33725 | HB2 LEU 2253  | 68.555 | 90.965 | 56.320 | 0.00 | 0.00 |
| ATOM 33726 | HB3 LEU 2253  | 69.113 | 89.906 | 57.660 | 0.00 | 0.00 |
| ATOM 33727 | CG LEU 2253   | 69.848 | 89.534 | 55.623 | 0.00 | 0.00 |
| ATOM 33728 | HG LEU 2253   | 69.533 | 89.888 | 54.641 | 0.00 | 0.00 |
| ATOM 33729 | CD1 LEU 2253  | 71.170 | 90.279 | 55.938 | 0.00 | 0.00 |
| ATOM 33730 | 1HD1 LEU 2253 | 71.872 | 89.880 | 55.207 | 0.00 | 0.00 |
| ATOM 33731 | 2HD1 LEU 2253 | 71.112 | 91.368 | 55.919 | 0.00 | 0.00 |
| ATOM 33732 | 3HD1 LEU 2253 | 71.567 | 90.089 | 56.935 | 0.00 | 0.00 |
| ATOM 33733 | CD2 LEU 2253  | 70.202 | 88.030 | 55.719 | 0.00 | 0.00 |
| ATOM 33734 | 1HD2 LEU 2253 | 69.395 | 87.432 | 55.294 | 0.00 | 0.00 |
| ATOM 33735 | 2HD2 LEU 2253 | 71.054 | 87.883 | 55.055 | 0.00 | 0.00 |
| ATOM 33736 | 3HD2 LEU 2253 | 70.521 | 87.697 | 56.706 | 0.00 | 0.00 |
| ATOM 33737 | C LEU 2253    | 66.373 | 89.757 | 57.395 | 0.00 | 0.00 |
| ATOM 33738 | O LEU 2253    | 65.567 | 90.574 | 56.946 | 0.00 | 0.00 |
| ATOM 33739 | N ARG 2254    | 66.312 | 89.232 | 58.660 | 0.00 | 0.00 |

|      |       |      |     |      |        |        |        |      |      |
|------|-------|------|-----|------|--------|--------|--------|------|------|
| ATOM | 33740 | H    | ARG | 2254 | 67.015 | 88.569 | 58.954 | 0.00 | 0.00 |
| ATOM | 33741 | CA   | ARG | 2254 | 65.161 | 89.393 | 59.581 | 0.00 | 0.00 |
| ATOM | 33742 | HA   | ARG | 2254 | 64.451 | 90.007 | 59.028 | 0.00 | 0.00 |
| ATOM | 33743 | CB   | ARG | 2254 | 64.660 | 87.998 | 59.913 | 0.00 | 0.00 |
| ATOM | 33744 | HB2  | ARG | 2254 | 65.505 | 87.433 | 60.307 | 0.00 | 0.00 |
| ATOM | 33745 | HB3  | ARG | 2254 | 63.791 | 88.004 | 60.571 | 0.00 | 0.00 |
| ATOM | 33746 | CG   | ARG | 2254 | 64.306 | 87.119 | 58.721 | 0.00 | 0.00 |
| ATOM | 33747 | HG2  | ARG | 2254 | 63.659 | 87.715 | 58.078 | 0.00 | 0.00 |
| ATOM | 33748 | HG3  | ARG | 2254 | 65.223 | 86.899 | 58.173 | 0.00 | 0.00 |
| ATOM | 33749 | CD   | ARG | 2254 | 63.770 | 85.749 | 59.114 | 0.00 | 0.00 |
| ATOM | 33750 | HD2  | ARG | 2254 | 63.620 | 85.201 | 58.185 | 0.00 | 0.00 |
| ATOM | 33751 | HD3  | ARG | 2254 | 64.583 | 85.375 | 59.737 | 0.00 | 0.00 |
| ATOM | 33752 | NE   | ARG | 2254 | 62.591 | 85.693 | 59.971 | 0.00 | 0.00 |
| ATOM | 33753 | HE   | ARG | 2254 | 62.111 | 86.572 | 60.107 | 0.00 | 0.00 |
| ATOM | 33754 | CZ   | ARG | 2254 | 62.012 | 84.579 | 60.436 | 0.00 | 0.00 |
| ATOM | 33755 | NH1  | ARG | 2254 | 62.448 | 83.322 | 60.219 | 0.00 | 0.00 |
| ATOM | 33756 | 1HH1 | ARG | 2254 | 61.923 | 82.547 | 60.599 | 0.00 | 0.00 |
| ATOM | 33757 | 2HH1 | ARG | 2254 | 63.115 | 83.178 | 59.474 | 0.00 | 0.00 |
| ATOM | 33758 | NH2  | ARG | 2254 | 61.032 | 84.732 | 61.280 | 0.00 | 0.00 |
| ATOM | 33759 | 1HH2 | ARG | 2254 | 60.623 | 83.906 | 61.692 | 0.00 | 0.00 |
| ATOM | 33760 | 2HH2 | ARG | 2254 | 60.837 | 85.700 | 61.495 | 0.00 | 0.00 |
| ATOM | 33761 | C    | ARG | 2254 | 65.444 | 90.125 | 60.879 | 0.00 | 0.00 |
| ATOM | 33762 | O    | ARG | 2254 | 64.535 | 90.534 | 61.554 | 0.00 | 0.00 |
| ATOM | 33763 | N    | SER | 2255 | 66.734 | 90.412 | 61.153 | 0.00 | 0.00 |
| ATOM | 33764 | H    | SER | 2255 | 67.480 | 90.142 | 60.528 | 0.00 | 0.00 |
| ATOM | 33765 | CA   | SER | 2255 | 67.068 | 91.288 | 62.281 | 0.00 | 0.00 |

|      |       |      |     |      |        |        |        |      |      |
|------|-------|------|-----|------|--------|--------|--------|------|------|
| ATOM | 33766 | HA   | SER | 2255 | 66.763 | 90.807 | 63.210 | 0.00 | 0.00 |
| ATOM | 33767 | CB   | SER | 2255 | 68.596 | 91.330 | 62.303 | 0.00 | 0.00 |
| ATOM | 33768 | HB2  | SER | 2255 | 68.882 | 91.885 | 61.409 | 0.00 | 0.00 |
| ATOM | 33769 | HB3  | SER | 2255 | 68.858 | 91.823 | 63.240 | 0.00 | 0.00 |
| ATOM | 33770 | OG   | SER | 2255 | 69.164 | 90.019 | 62.425 | 0.00 | 0.00 |
| ATOM | 33771 | HG   | SER | 2255 | 69.117 | 89.507 | 61.614 | 0.00 | 0.00 |
| ATOM | 33772 | C    | SER | 2255 | 66.602 | 92.721 | 62.138 | 0.00 | 0.00 |
| ATOM | 33773 | O    | SER | 2255 | 66.332 | 93.169 | 61.005 | 0.00 | 0.00 |
| ATOM | 33774 | N    | ALA | 2256 | 66.540 | 93.542 | 63.172 | 0.00 | 0.00 |
| ATOM | 33775 | H    | ALA | 2256 | 66.664 | 93.097 | 64.071 | 0.00 | 0.00 |
| ATOM | 33776 | CA   | ALA | 2256 | 66.376 | 94.995 | 62.988 | 0.00 | 0.00 |
| ATOM | 33777 | HA   | ALA | 2256 | 65.564 | 95.050 | 62.263 | 0.00 | 0.00 |
| ATOM | 33778 | CB   | ALA | 2256 | 65.931 | 95.571 | 64.365 | 0.00 | 0.00 |
| ATOM | 33779 | HB1  | ALA | 2256 | 65.895 | 96.657 | 64.453 | 0.00 | 0.00 |
| ATOM | 33780 | HB2  | ALA | 2256 | 64.873 | 95.377 | 64.538 | 0.00 | 0.00 |
| ATOM | 33781 | HB3  | ALA | 2256 | 66.585 | 95.213 | 65.160 | 0.00 | 0.00 |
| ATOM | 33782 | C    | ALA | 2256 | 67.654 | 95.651 | 62.333 | 0.00 | 0.00 |
| ATOM | 33783 | O    | ALA | 2256 | 68.792 | 95.418 | 62.750 | 0.00 | 0.00 |
| ATOM | 33784 | N    | ILE | 2257 | 67.391 | 96.589 | 61.399 | 0.00 | 0.00 |
| ATOM | 33785 | H    | ILE | 2257 | 66.458 | 96.637 | 61.016 | 0.00 | 0.00 |
| ATOM | 33786 | CA   | ILE | 2257 | 68.482 | 97.257 | 60.721 | 0.00 | 0.00 |
| ATOM | 33787 | HA   | ILE | 2257 | 69.380 | 96.675 | 60.929 | 0.00 | 0.00 |
| ATOM | 33788 | CB   | ILE | 2257 | 68.376 | 97.227 | 59.169 | 0.00 | 0.00 |
| ATOM | 33789 | HB   | ILE | 2257 | 69.302 | 97.671 | 58.804 | 0.00 | 0.00 |
| ATOM | 33790 | CG2  | ILE | 2257 | 68.474 | 95.791 | 58.792 | 0.00 | 0.00 |
| ATOM | 33791 | 1HG2 | ILE | 2257 | 69.346 | 95.327 | 59.251 | 0.00 | 0.00 |

|      |       |      |     |      |        |         |        |      |      |
|------|-------|------|-----|------|--------|---------|--------|------|------|
| ATOM | 33792 | 2HG2 | ILE | 2257 | 67.622 | 95.205  | 59.136 | 0.00 | 0.00 |
| ATOM | 33793 | 3HG2 | ILE | 2257 | 68.629 | 95.662  | 57.721 | 0.00 | 0.00 |
| ATOM | 33794 | CG1  | ILE | 2257 | 67.155 | 97.837  | 58.519 | 0.00 | 0.00 |
| ATOM | 33795 | 2HG1 | ILE | 2257 | 67.171 | 97.575  | 57.461 | 0.00 | 0.00 |
| ATOM | 33796 | 3HG1 | ILE | 2257 | 66.222 | 97.388  | 58.858 | 0.00 | 0.00 |
| ATOM | 33797 | CD1  | ILE | 2257 | 66.982 | 99.321  | 58.844 | 0.00 | 0.00 |
| ATOM | 33798 | 1HD1 | ILE | 2257 | 66.607 | 99.440  | 59.861 | 0.00 | 0.00 |
| ATOM | 33799 | 2HD1 | ILE | 2257 | 68.021 | 99.647  | 58.799 | 0.00 | 0.00 |
| ATOM | 33800 | 3HD1 | ILE | 2257 | 66.169 | 99.754  | 58.262 | 0.00 | 0.00 |
| ATOM | 33801 | C    | ILE | 2257 | 68.901 | 98.682  | 61.314 | 0.00 | 0.00 |
| ATOM | 33802 | O    | ILE | 2257 | 68.126 | 99.370  | 62.008 | 0.00 | 0.00 |
| ATOM | 33803 | N    | ALA | 2258 | 70.156 | 99.053  | 61.078 | 0.00 | 0.00 |
| ATOM | 33804 | H    | ALA | 2258 | 70.732 | 98.465  | 60.492 | 0.00 | 0.00 |
| ATOM | 33805 | CA   | ALA | 2258 | 70.732 | 100.374 | 61.371 | 0.00 | 0.00 |
| ATOM | 33806 | HA   | ALA | 2258 | 69.935 | 101.087 | 61.160 | 0.00 | 0.00 |
| ATOM | 33807 | CB   | ALA | 2258 | 71.247 | 100.411 | 62.810 | 0.00 | 0.00 |
| ATOM | 33808 | HB1  | ALA | 2258 | 70.336 | 100.379 | 63.406 | 0.00 | 0.00 |
| ATOM | 33809 | HB2  | ALA | 2258 | 71.876 | 99.564  | 63.087 | 0.00 | 0.00 |
| ATOM | 33810 | HB3  | ALA | 2258 | 71.848 | 101.303 | 62.986 | 0.00 | 0.00 |
| ATOM | 33811 | C    | ALA | 2258 | 71.776 | 100.715 | 60.269 | 0.00 | 0.00 |
| ATOM | 33812 | O    | ALA | 2258 | 72.736 | 99.958  | 60.140 | 0.00 | 0.00 |
| ATOM | 33813 | N    | VAL | 2259 | 71.829 | 101.877 | 59.605 | 0.00 | 0.00 |
| ATOM | 33814 | H    | VAL | 2259 | 71.091 | 102.531 | 59.824 | 0.00 | 0.00 |
| ATOM | 33815 | CA   | VAL | 2259 | 72.837 | 102.412 | 58.721 | 0.00 | 0.00 |
| ATOM | 33816 | HA   | VAL | 2259 | 73.352 | 101.480 | 58.488 | 0.00 | 0.00 |
| ATOM | 33817 | CB   | VAL | 2259 | 72.231 | 102.903 | 57.368 | 0.00 | 0.00 |



|            |      |          |        |         |        |      |      |
|------------|------|----------|--------|---------|--------|------|------|
| ATOM 33818 | HB   | VAL 2259 | 71.481 | 103.675 | 57.540 | 0.00 | 0.00 |
| ATOM 33819 | CG1  | VAL 2259 | 73.201 | 103.578 | 56.388 | 0.00 | 0.00 |
| ATOM 33820 | 1HG1 | VAL 2259 | 73.557 | 104.507 | 56.833 | 0.00 | 0.00 |
| ATOM 33821 | 2HG1 | VAL 2259 | 74.110 | 103.000 | 56.224 | 0.00 | 0.00 |
| ATOM 33822 | 3HG1 | VAL 2259 | 72.712 | 103.735 | 55.427 | 0.00 | 0.00 |
| ATOM 33823 | CG2  | VAL 2259 | 71.488 | 101.727 | 56.685 | 0.00 | 0.00 |
| ATOM 33824 | 1HG2 | VAL 2259 | 72.277 | 101.059 | 56.341 | 0.00 | 0.00 |
| ATOM 33825 | 2HG2 | VAL 2259 | 70.793 | 101.277 | 57.394 | 0.00 | 0.00 |
| ATOM 33826 | 3HG2 | VAL 2259 | 71.010 | 102.050 | 55.760 | 0.00 | 0.00 |
| ATOM 33827 | C    | VAL 2259 | 73.808 | 103.367 | 59.417 | 0.00 | 0.00 |
| ATOM 33828 | O    | VAL 2259 | 73.385 | 104.257 | 60.126 | 0.00 | 0.00 |
| ATOM 33829 | N    | VAL 2260 | 75.117 | 103.269 | 59.123 | 0.00 | 0.00 |
| ATOM 33830 | H    | VAL 2260 | 75.259 | 102.598 | 58.381 | 0.00 | 0.00 |
| ATOM 33831 | CA   | VAL 2260 | 76.305 | 104.035 | 59.547 | 0.00 | 0.00 |
| ATOM 33832 | HA   | VAL 2260 | 76.197 | 104.204 | 60.618 | 0.00 | 0.00 |
| ATOM 33833 | CB   | VAL 2260 | 77.666 | 103.363 | 59.301 | 0.00 | 0.00 |
| ATOM 33834 | HB   | VAL 2260 | 78.478 | 103.896 | 59.796 | 0.00 | 0.00 |
| ATOM 33835 | CG1  | VAL 2260 | 77.633 | 102.025 | 60.034 | 0.00 | 0.00 |
| ATOM 33836 | 1HG1 | VAL 2260 | 77.348 | 102.201 | 61.071 | 0.00 | 0.00 |
| ATOM 33837 | 2HG1 | VAL 2260 | 76.855 | 101.414 | 59.575 | 0.00 | 0.00 |
| ATOM 33838 | 3HG1 | VAL 2260 | 78.573 | 101.475 | 60.010 | 0.00 | 0.00 |
| ATOM 33839 | CG2  | VAL 2260 | 78.162 | 103.107 | 57.892 | 0.00 | 0.00 |
| ATOM 33840 | 1HG2 | VAL 2260 | 78.089 | 103.992 | 57.259 | 0.00 | 0.00 |
| ATOM 33841 | 2HG2 | VAL 2260 | 79.205 | 102.836 | 58.058 | 0.00 | 0.00 |
| ATOM 33842 | 3HG2 | VAL 2260 | 77.618 | 102.249 | 57.498 | 0.00 | 0.00 |
| ATOM 33843 | C    | VAL 2260 | 76.374 | 105.466 | 59.066 | 0.00 | 0.00 |

|      |       |     |     |      |        |         |        |      |      |
|------|-------|-----|-----|------|--------|---------|--------|------|------|
| ATOM | 33844 | O   | VAL | 2260 | 76.005 | 105.724 | 57.914 | 0.00 | 0.00 |
| ATOM | 33845 | N   | LYS | 2261 | 76.731 | 106.378 | 59.959 | 0.00 | 0.00 |
| ATOM | 33846 | H   | LYS | 2261 | 77.068 | 105.965 | 60.817 | 0.00 | 0.00 |
| ATOM | 33847 | CA  | LYS | 2261 | 76.746 | 107.858 | 59.771 | 0.00 | 0.00 |
| ATOM | 33848 | HA  | LYS | 2261 | 76.798 | 108.123 | 58.715 | 0.00 | 0.00 |
| ATOM | 33849 | CB  | LYS | 2261 | 75.436 | 108.508 | 60.254 | 0.00 | 0.00 |
| ATOM | 33850 | HB2 | LYS | 2261 | 75.343 | 108.374 | 61.332 | 0.00 | 0.00 |
| ATOM | 33851 | HB3 | LYS | 2261 | 75.508 | 109.594 | 60.195 | 0.00 | 0.00 |
| ATOM | 33852 | CG  | LYS | 2261 | 74.163 | 108.161 | 59.486 | 0.00 | 0.00 |
| ATOM | 33853 | HG2 | LYS | 2261 | 74.297 | 108.499 | 58.459 | 0.00 | 0.00 |
| ATOM | 33854 | HG3 | LYS | 2261 | 74.049 | 107.077 | 59.492 | 0.00 | 0.00 |
| ATOM | 33855 | CD  | LYS | 2261 | 72.876 | 108.767 | 60.171 | 0.00 | 0.00 |
| ATOM | 33856 | HD2 | LYS | 2261 | 72.800 | 108.433 | 61.206 | 0.00 | 0.00 |
| ATOM | 33857 | HD3 | LYS | 2261 | 72.876 | 109.854 | 60.251 | 0.00 | 0.00 |
| ATOM | 33858 | CE  | LYS | 2261 | 71.615 | 108.236 | 59.444 | 0.00 | 0.00 |
| ATOM | 33859 | HE2 | LYS | 2261 | 71.534 | 108.569 | 58.409 | 0.00 | 0.00 |
| ATOM | 33860 | HE3 | LYS | 2261 | 71.930 | 107.210 | 59.251 | 0.00 | 0.00 |
| ATOM | 33861 | NZ  | LYS | 2261 | 70.392 | 108.324 | 60.211 | 0.00 | 0.00 |
| ATOM | 33862 | HZ1 | LYS | 2261 | 69.518 | 108.432 | 59.715 | 0.00 | 0.00 |
| ATOM | 33863 | HZ2 | LYS | 2261 | 70.292 | 107.619 | 60.927 | 0.00 | 0.00 |
| ATOM | 33864 | HZ3 | LYS | 2261 | 70.352 | 109.239 | 60.639 | 0.00 | 0.00 |
| ATOM | 33865 | C   | LYS | 2261 | 77.904 | 108.274 | 60.621 | 0.00 | 0.00 |
| ATOM | 33866 | O   | LYS | 2261 | 78.128 | 107.778 | 61.694 | 0.00 | 0.00 |
| ATOM | 33867 | N   | GLY | 2262 | 78.691 | 109.146 | 60.046 | 0.00 | 0.00 |
| ATOM | 33868 | H   | GLY | 2262 | 78.464 | 109.449 | 59.110 | 0.00 | 0.00 |
| ATOM | 33869 | CA  | GLY | 2262 | 79.722 | 109.861 | 60.710 | 0.00 | 0.00 |

|      |       |     |     |      |        |         |        |      |      |
|------|-------|-----|-----|------|--------|---------|--------|------|------|
| ATOM | 33870 | HA2 | GLY | 2262 | 79.769 | 110.903 | 60.394 | 0.00 | 0.00 |
| ATOM | 33871 | HA3 | GLY | 2262 | 79.555 | 110.001 | 61.778 | 0.00 | 0.00 |
| ATOM | 33872 | C   | GLY | 2262 | 81.094 | 109.234 | 60.469 | 0.00 | 0.00 |
| ATOM | 33873 | O   | GLY | 2262 | 82.065 | 109.737 | 61.042 | 0.00 | 0.00 |
| ATOM | 33874 | N   | CYS | 2263 | 81.263 | 108.236 | 59.613 | 0.00 | 0.00 |
| ATOM | 33875 | H   | CYS | 2263 | 80.408 | 107.896 | 59.195 | 0.00 | 0.00 |
| ATOM | 33876 | CA  | CYS | 2263 | 82.545 | 107.512 | 59.591 | 0.00 | 0.00 |
| ATOM | 33877 | HA  | CYS | 2263 | 82.847 | 107.205 | 60.592 | 0.00 | 0.00 |
| ATOM | 33878 | CB  | CYS | 2263 | 82.435 | 106.331 | 58.683 | 0.00 | 0.00 |
| ATOM | 33879 | HB2 | CYS | 2263 | 81.982 | 106.585 | 57.725 | 0.00 | 0.00 |
| ATOM | 33880 | HB3 | CYS | 2263 | 83.461 | 105.965 | 58.637 | 0.00 | 0.00 |
| ATOM | 33881 | SG  | CYS | 2263 | 81.590 | 104.998 | 59.580 | 0.00 | 0.00 |
| ATOM | 33882 | HG  | CYS | 2263 | 80.456 | 105.463 | 59.049 | 0.00 | 0.00 |
| ATOM | 33883 | C   | CYS | 2263 | 83.677 | 108.363 | 58.953 | 0.00 | 0.00 |
| ATOM | 33884 | O   | CYS | 2263 | 84.797 | 107.939 | 59.088 | 0.00 | 0.00 |
| ATOM | 33885 | N   | ARG | 2264 | 83.430 | 109.525 | 58.275 | 0.00 | 0.00 |
| ATOM | 33886 | H   | ARG | 2264 | 82.455 | 109.778 | 58.206 | 0.00 | 0.00 |
| ATOM | 33887 | CA  | ARG | 2264 | 84.460 | 110.345 | 57.637 | 0.00 | 0.00 |
| ATOM | 33888 | HA  | ARG | 2264 | 85.419 | 109.831 | 57.699 | 0.00 | 0.00 |
| ATOM | 33889 | CB  | ARG | 2264 | 84.090 | 110.832 | 56.251 | 0.00 | 0.00 |
| ATOM | 33890 | HB2 | ARG | 2264 | 83.077 | 111.231 | 56.299 | 0.00 | 0.00 |
| ATOM | 33891 | HB3 | ARG | 2264 | 84.892 | 111.537 | 56.032 | 0.00 | 0.00 |
| ATOM | 33892 | CG  | ARG | 2264 | 84.195 | 109.802 | 55.141 | 0.00 | 0.00 |
| ATOM | 33893 | HG2 | ARG | 2264 | 83.529 | 109.025 | 55.516 | 0.00 | 0.00 |
| ATOM | 33894 | HG3 | ARG | 2264 | 83.905 | 110.260 | 54.196 | 0.00 | 0.00 |
| ATOM | 33895 | CD  | ARG | 2264 | 85.550 | 109.273 | 55.005 | 0.00 | 0.00 |

|      |       |      |     |      |        |         |        |      |      |
|------|-------|------|-----|------|--------|---------|--------|------|------|
| ATOM | 33896 | HD2  | ARG | 2264 | 85.834 | 108.965 | 53.999 | 0.00 | 0.00 |
| ATOM | 33897 | HD3  | ARG | 2264 | 86.250 | 110.076 | 55.236 | 0.00 | 0.00 |
| ATOM | 33898 | NE   | ARG | 2264 | 85.845 | 108.166 | 55.858 | 0.00 | 0.00 |
| ATOM | 33899 | HE   | ARG | 2264 | 85.149 | 107.500 | 56.163 | 0.00 | 0.00 |
| ATOM | 33900 | CZ   | ARG | 2264 | 87.029 | 107.777 | 56.207 | 0.00 | 0.00 |
| ATOM | 33901 | NH1  | ARG | 2264 | 88.125 | 108.206 | 55.647 | 0.00 | 0.00 |
| ATOM | 33902 | 1HH1 | ARG | 2264 | 89.022 | 107.999 | 56.063 | 0.00 | 0.00 |
| ATOM | 33903 | 2HH1 | ARG | 2264 | 87.977 | 108.778 | 54.828 | 0.00 | 0.00 |
| ATOM | 33904 | NH2  | ARG | 2264 | 87.133 | 107.056 | 57.247 | 0.00 | 0.00 |
| ATOM | 33905 | 1HH2 | ARG | 2264 | 88.056 | 106.789 | 57.559 | 0.00 | 0.00 |
| ATOM | 33906 | 2HH2 | ARG | 2264 | 86.329 | 107.025 | 57.858 | 0.00 | 0.00 |
| ATOM | 33907 | C    | ARG | 2264 | 84.649 | 111.566 | 58.587 | 0.00 | 0.00 |
| ATOM | 33908 | O    | ARG | 2264 | 85.785 | 111.981 | 58.797 | 0.00 | 0.00 |
| ATOM | 33909 | N    | THR | 2265 | 83.604 | 112.077 | 59.251 | 0.00 | 0.00 |
| ATOM | 33910 | H    | THR | 2265 | 82.714 | 111.598 | 59.232 | 0.00 | 0.00 |
| ATOM | 33911 | CA   | THR | 2265 | 83.617 | 113.300 | 60.181 | 0.00 | 0.00 |
| ATOM | 33912 | HA   | THR | 2265 | 84.253 | 114.004 | 59.644 | 0.00 | 0.00 |
| ATOM | 33913 | CB   | THR | 2265 | 82.197 | 113.779 | 60.317 | 0.00 | 0.00 |
| ATOM | 33914 | HB   | THR | 2265 | 82.260 | 114.650 | 60.969 | 0.00 | 0.00 |
| ATOM | 33915 | CG2  | THR | 2265 | 81.398 | 114.214 | 59.101 | 0.00 | 0.00 |
| ATOM | 33916 | 1HG2 | THR | 2265 | 82.019 | 114.927 | 58.559 | 0.00 | 0.00 |
| ATOM | 33917 | 2HG2 | THR | 2265 | 81.294 | 113.394 | 58.391 | 0.00 | 0.00 |
| ATOM | 33918 | 3HG2 | THR | 2265 | 80.421 | 114.615 | 59.370 | 0.00 | 0.00 |
| ATOM | 33919 | OG1  | THR | 2265 | 81.313 | 112.853 | 60.990 | 0.00 | 0.00 |
| ATOM | 33920 | HG1  | THR | 2265 | 80.843 | 113.323 | 61.684 | 0.00 | 0.00 |
| ATOM | 33921 | C    | THR | 2265 | 84.193 | 113.135 | 61.551 | 0.00 | 0.00 |

|      |       |      |     |      |        |         |        |      |      |
|------|-------|------|-----|------|--------|---------|--------|------|------|
| ATOM | 33922 | O    | THR | 2265 | 84.656 | 114.108 | 62.178 | 0.00 | 0.00 |
| ATOM | 33923 | N    | VAL | 2266 | 84.205 | 111.933 | 62.052 | 0.00 | 0.00 |
| ATOM | 33924 | H    | VAL | 2266 | 83.762 | 111.226 | 61.482 | 0.00 | 0.00 |
| ATOM | 33925 | CA   | VAL | 2266 | 84.859 | 111.462 | 63.309 | 0.00 | 0.00 |
| ATOM | 33926 | HA   | VAL | 2266 | 84.375 | 111.938 | 64.162 | 0.00 | 0.00 |
| ATOM | 33927 | CB   | VAL | 2266 | 84.585 | 109.925 | 63.525 | 0.00 | 0.00 |
| ATOM | 33928 | HB   | VAL | 2266 | 83.511 | 109.850 | 63.694 | 0.00 | 0.00 |
| ATOM | 33929 | CG1  | VAL | 2266 | 84.968 | 109.115 | 62.317 | 0.00 | 0.00 |
| ATOM | 33930 | 1HG1 | VAL | 2266 | 86.044 | 109.189 | 62.158 | 0.00 | 0.00 |
| ATOM | 33931 | 2HG1 | VAL | 2266 | 84.619 | 108.101 | 62.512 | 0.00 | 0.00 |
| ATOM | 33932 | 3HG1 | VAL | 2266 | 84.537 | 109.425 | 61.365 | 0.00 | 0.00 |
| ATOM | 33933 | CG2  | VAL | 2266 | 85.249 | 109.299 | 64.696 | 0.00 | 0.00 |
| ATOM | 33934 | 1HG2 | VAL | 2266 | 86.328 | 109.210 | 64.563 | 0.00 | 0.00 |
| ATOM | 33935 | 2HG2 | VAL | 2266 | 84.951 | 109.917 | 65.543 | 0.00 | 0.00 |
| ATOM | 33936 | 3HG2 | VAL | 2266 | 84.848 | 108.310 | 64.917 | 0.00 | 0.00 |
| ATOM | 33937 | C    | VAL | 2266 | 86.306 | 111.964 | 63.404 | 0.00 | 0.00 |
| ATOM | 33938 | O    | VAL | 2266 | 87.106 | 111.713 | 62.476 | 0.00 | 0.00 |
| ATOM | 33939 | N    | GLN | 2267 | 86.725 | 112.523 | 64.504 | 0.00 | 0.00 |
| ATOM | 33940 | H    | GLN | 2267 | 85.973 | 112.714 | 65.151 | 0.00 | 0.00 |
| ATOM | 33941 | CA   | GLN | 2267 | 88.084 | 112.975 | 64.769 | 0.00 | 0.00 |
| ATOM | 33942 | HA   | GLN | 2267 | 88.846 | 112.506 | 64.145 | 0.00 | 0.00 |
| ATOM | 33943 | CB   | GLN | 2267 | 88.250 | 114.499 | 64.732 | 0.00 | 0.00 |
| ATOM | 33944 | HB2  | GLN | 2267 | 87.521 | 114.819 | 65.476 | 0.00 | 0.00 |
| ATOM | 33945 | HB3  | GLN | 2267 | 89.266 | 114.792 | 64.997 | 0.00 | 0.00 |
| ATOM | 33946 | CG   | GLN | 2267 | 87.974 | 115.167 | 63.375 | 0.00 | 0.00 |
| ATOM | 33947 | HG2  | GLN | 2267 | 86.970 | 115.012 | 62.981 | 0.00 | 0.00 |

|      |       |      |     |      |        |         |        |      |      |
|------|-------|------|-----|------|--------|---------|--------|------|------|
| ATOM | 33948 | HG3  | GLN | 2267 | 88.013 | 116.246 | 63.525 | 0.00 | 0.00 |
| ATOM | 33949 | CD   | GLN | 2267 | 88.960 | 114.813 | 62.258 | 0.00 | 0.00 |
| ATOM | 33950 | OE1  | GLN | 2267 | 90.016 | 115.325 | 62.081 | 0.00 | 0.00 |
| ATOM | 33951 | NE2  | GLN | 2267 | 88.752 | 113.744 | 61.520 | 0.00 | 0.00 |
| ATOM | 33952 | 1HE2 | GLN | 2267 | 89.502 | 113.657 | 60.850 | 0.00 | 0.00 |
| ATOM | 33953 | 2HE2 | GLN | 2267 | 87.888 | 113.240 | 61.660 | 0.00 | 0.00 |
| ATOM | 33954 | C    | GLN | 2267 | 88.519 | 112.478 | 66.082 | 0.00 | 0.00 |
| ATOM | 33955 | O    | GLN | 2267 | 87.607 | 112.125 | 66.850 | 0.00 | 0.00 |
| ATOM | 33956 | N    | LYS | 2268 | 89.750 | 112.646 | 66.470 | 0.00 | 0.00 |
| ATOM | 33957 | H    | LYS | 2268 | 90.380 | 113.035 | 65.783 | 0.00 | 0.00 |
| ATOM | 33958 | CA   | LYS | 2268 | 90.319 | 112.537 | 67.807 | 0.00 | 0.00 |
| ATOM | 33959 | HA   | LYS | 2268 | 90.125 | 111.481 | 67.999 | 0.00 | 0.00 |
| ATOM | 33960 | CB   | LYS | 2268 | 91.799 | 112.859 | 67.916 | 0.00 | 0.00 |
| ATOM | 33961 | HB2  | LYS | 2268 | 92.405 | 112.255 | 67.241 | 0.00 | 0.00 |
| ATOM | 33962 | HB3  | LYS | 2268 | 92.007 | 113.857 | 67.530 | 0.00 | 0.00 |
| ATOM | 33963 | CG   | LYS | 2268 | 92.528 | 112.621 | 69.267 | 0.00 | 0.00 |
| ATOM | 33964 | HG2  | LYS | 2268 | 93.604 | 112.779 | 69.202 | 0.00 | 0.00 |
| ATOM | 33965 | HG3  | LYS | 2268 | 92.151 | 113.355 | 69.980 | 0.00 | 0.00 |
| ATOM | 33966 | CD   | LYS | 2268 | 92.318 | 111.158 | 69.734 | 0.00 | 0.00 |
| ATOM | 33967 | HD2  | LYS | 2268 | 91.369 | 111.137 | 70.269 | 0.00 | 0.00 |
| ATOM | 33968 | HD3  | LYS | 2268 | 92.366 | 110.473 | 68.888 | 0.00 | 0.00 |
| ATOM | 33969 | CE   | LYS | 2268 | 93.291 | 110.770 | 70.851 | 0.00 | 0.00 |
| ATOM | 33970 | HE2  | LYS | 2268 | 92.994 | 111.495 | 71.609 | 0.00 | 0.00 |
| ATOM | 33971 | HE3  | LYS | 2268 | 93.118 | 109.769 | 71.245 | 0.00 | 0.00 |
| ATOM | 33972 | NZ   | LYS | 2268 | 94.722 | 110.938 | 70.380 | 0.00 | 0.00 |
| ATOM | 33973 | HZ1  | LYS | 2268 | 95.354 | 110.240 | 70.747 | 0.00 | 0.00 |

|      |       |     |     |      |        |         |        |      |      |
|------|-------|-----|-----|------|--------|---------|--------|------|------|
| ATOM | 33974 | HZ2 | LYS | 2268 | 94.827 | 110.860 | 69.379 | 0.00 | 0.00 |
| ATOM | 33975 | HZ3 | LYS | 2268 | 95.059 | 111.811 | 70.760 | 0.00 | 0.00 |
| ATOM | 33976 | C   | LYS | 2268 | 89.458 | 113.284 | 68.819 | 0.00 | 0.00 |
| ATOM | 33977 | O   | LYS | 2268 | 89.315 | 112.898 | 69.997 | 0.00 | 0.00 |
| ATOM | 33978 | N   | ALA | 2269 | 88.819 | 114.412 | 68.471 | 0.00 | 0.00 |
| ATOM | 33979 | H   | ALA | 2269 | 89.005 | 114.782 | 67.550 | 0.00 | 0.00 |
| ATOM | 33980 | CA  | ALA | 2269 | 87.992 | 115.237 | 69.354 | 0.00 | 0.00 |
| ATOM | 33981 | HA  | ALA | 2269 | 88.494 | 115.171 | 70.319 | 0.00 | 0.00 |
| ATOM | 33982 | CB  | ALA | 2269 | 87.755 | 116.615 | 68.867 | 0.00 | 0.00 |
| ATOM | 33983 | HB1 | ALA | 2269 | 87.090 | 117.146 | 69.548 | 0.00 | 0.00 |
| ATOM | 33984 | HB2 | ALA | 2269 | 88.715 | 117.109 | 68.716 | 0.00 | 0.00 |
| ATOM | 33985 | HB3 | ALA | 2269 | 87.255 | 116.507 | 67.905 | 0.00 | 0.00 |
| ATOM | 33986 | C   | ALA | 2269 | 86.685 | 114.505 | 69.771 | 0.00 | 0.00 |
| ATOM | 33987 | O   | ALA | 2269 | 86.219 | 114.585 | 70.903 | 0.00 | 0.00 |
| ATOM | 33988 | N   | ASP | 2270 | 86.128 | 113.673 | 68.882 | 0.00 | 0.00 |
| ATOM | 33989 | H   | ASP | 2270 | 86.627 | 113.511 | 68.019 | 0.00 | 0.00 |
| ATOM | 33990 | CA  | ASP | 2270 | 84.950 | 112.870 | 69.098 | 0.00 | 0.00 |
| ATOM | 33991 | HA  | ASP | 2270 | 84.217 | 113.589 | 69.464 | 0.00 | 0.00 |
| ATOM | 33992 | CB  | ASP | 2270 | 84.522 | 112.160 | 67.806 | 0.00 | 0.00 |
| ATOM | 33993 | HB2 | ASP | 2270 | 85.364 | 111.558 | 67.465 | 0.00 | 0.00 |
| ATOM | 33994 | HB3 | ASP | 2270 | 83.679 | 111.483 | 67.947 | 0.00 | 0.00 |
| ATOM | 33995 | CG  | ASP | 2270 | 84.008 | 113.099 | 66.663 | 0.00 | 0.00 |
| ATOM | 33996 | OD1 | ASP | 2270 | 82.825 | 113.044 | 66.397 | 0.00 | 0.00 |
| ATOM | 33997 | OD2 | ASP | 2270 | 84.827 | 113.767 | 65.987 | 0.00 | 0.00 |
| ATOM | 33998 | C   | ASP | 2270 | 85.128 | 111.892 | 70.249 | 0.00 | 0.00 |
| ATOM | 33999 | O   | ASP | 2270 | 84.127 | 111.548 | 70.838 | 0.00 | 0.00 |

|            |      |     |      |        |         |        |      |      |
|------------|------|-----|------|--------|---------|--------|------|------|
| ATOM 34000 | N    | MET | 2271 | 86.374 | 111.501 | 70.470 | 0.00 | 0.00 |
| ATOM 34001 | H    | MET | 2271 | 87.134 | 111.843 | 69.899 | 0.00 | 0.00 |
| ATOM 34002 | CA   | MET | 2271 | 86.647 | 110.600 | 71.511 | 0.00 | 0.00 |
| ATOM 34003 | HA   | MET | 2271 | 85.850 | 109.856 | 71.496 | 0.00 | 0.00 |
| ATOM 34004 | CB   | MET | 2271 | 88.026 | 109.853 | 71.285 | 0.00 | 0.00 |
| ATOM 34005 | HB2  | MET | 2271 | 88.869 | 110.526 | 71.445 | 0.00 | 0.00 |
| ATOM 34006 | HB3  | MET | 2271 | 88.171 | 109.001 | 71.950 | 0.00 | 0.00 |
| ATOM 34007 | CG   | MET | 2271 | 88.249 | 109.289 | 69.887 | 0.00 | 0.00 |
| ATOM 34008 | HG2  | MET | 2271 | 88.253 | 110.027 | 69.084 | 0.00 | 0.00 |
| ATOM 34009 | HG3  | MET | 2271 | 89.212 | 108.793 | 70.006 | 0.00 | 0.00 |
| ATOM 34010 | SD   | MET | 2271 | 87.168 | 107.975 | 69.326 | 0.00 | 0.00 |
| ATOM 34011 | CE   | MET | 2271 | 86.193 | 108.945 | 68.130 | 0.00 | 0.00 |
| ATOM 34012 | HE1  | MET | 2271 | 86.219 | 109.989 | 68.443 | 0.00 | 0.00 |
| ATOM 34013 | HE2  | MET | 2271 | 86.608 | 108.901 | 67.123 | 0.00 | 0.00 |
| ATOM 34014 | HE3  | MET | 2271 | 85.149 | 108.634 | 68.151 | 0.00 | 0.00 |
| ATOM 34015 | C    | MET | 2271 | 86.540 | 111.177 | 72.927 | 0.00 | 0.00 |
| ATOM 34016 | O    | MET | 2271 | 87.515 | 111.673 | 73.415 | 0.00 | 0.00 |
| ATOM 34017 | N    | VAL | 2272 | 85.455 | 111.021 | 73.716 | 0.00 | 0.00 |
| ATOM 34018 | H    | VAL | 2272 | 84.686 | 110.583 | 73.230 | 0.00 | 0.00 |
| ATOM 34019 | CA   | VAL | 2272 | 85.303 | 111.610 | 75.019 | 0.00 | 0.00 |
| ATOM 34020 | HA   | VAL | 2272 | 85.391 | 112.687 | 74.879 | 0.00 | 0.00 |
| ATOM 34021 | CB   | VAL | 2272 | 83.850 | 111.504 | 75.551 | 0.00 | 0.00 |
| ATOM 34022 | HB   | VAL | 2272 | 83.958 | 111.745 | 76.608 | 0.00 | 0.00 |
| ATOM 34023 | CG1  | VAL | 2272 | 82.784 | 112.429 | 74.867 | 0.00 | 0.00 |
| ATOM 34024 | 1HG1 | VAL | 2272 | 83.296 | 113.390 | 74.813 | 0.00 | 0.00 |
| ATOM 34025 | 2HG1 | VAL | 2272 | 82.511 | 112.052 | 73.881 | 0.00 | 0.00 |



|      |       |      |     |      |        |         |        |      |      |
|------|-------|------|-----|------|--------|---------|--------|------|------|
| ATOM | 34026 | 3HG1 | VAL | 2272 | 81.881 | 112.485 | 75.475 | 0.00 | 0.00 |
| ATOM | 34027 | CG2  | VAL | 2272 | 83.317 | 110.099 | 75.545 | 0.00 | 0.00 |
| ATOM | 34028 | 1HG2 | VAL | 2272 | 82.366 | 109.982 | 76.065 | 0.00 | 0.00 |
| ATOM | 34029 | 2HG2 | VAL | 2272 | 83.254 | 109.620 | 74.568 | 0.00 | 0.00 |
| ATOM | 34030 | 3HG2 | VAL | 2272 | 83.981 | 109.464 | 76.132 | 0.00 | 0.00 |
| ATOM | 34031 | C    | VAL | 2272 | 86.319 | 111.190 | 76.078 | 0.00 | 0.00 |
| ATOM | 34032 | O    | VAL | 2272 | 86.578 | 110.001 | 76.206 | 0.00 | 0.00 |
| ATOM | 34033 | N    | HIE | 2273 | 86.849 | 112.193 | 76.810 | 0.00 | 0.00 |
| ATOM | 34034 | H    | HIE | 2273 | 86.498 | 113.132 | 76.686 | 0.00 | 0.00 |
| ATOM | 34035 | CA   | HIE | 2273 | 87.953 | 112.049 | 77.697 | 0.00 | 0.00 |
| ATOM | 34036 | HA   | HIE | 2273 | 88.262 | 113.075 | 77.895 | 0.00 | 0.00 |
| ATOM | 34037 | CB   | HIE | 2273 | 87.547 | 111.557 | 79.071 | 0.00 | 0.00 |
| ATOM | 34038 | HB2  | HIE | 2273 | 87.589 | 110.469 | 79.037 | 0.00 | 0.00 |
| ATOM | 34039 | HB3  | HIE | 2273 | 88.228 | 111.825 | 79.878 | 0.00 | 0.00 |
| ATOM | 34040 | CG   | HIE | 2273 | 86.143 | 112.005 | 79.502 | 0.00 | 0.00 |
| ATOM | 34041 | ND1  | HIE | 2273 | 85.769 | 113.176 | 80.248 | 0.00 | 0.00 |
| ATOM | 34042 | CE1  | HIE | 2273 | 84.454 | 113.144 | 80.432 | 0.00 | 0.00 |
| ATOM | 34043 | HE1  | HIE | 2273 | 83.896 | 113.853 | 81.026 | 0.00 | 0.00 |
| ATOM | 34044 | NE2  | HIE | 2273 | 83.945 | 111.950 | 80.050 | 0.00 | 0.00 |
| ATOM | 34045 | HE2  | HIE | 2273 | 83.033 | 111.557 | 80.233 | 0.00 | 0.00 |
| ATOM | 34046 | CD2  | HIE | 2273 | 84.982 | 111.231 | 79.436 | 0.00 | 0.00 |
| ATOM | 34047 | HD2  | HIE | 2273 | 84.834 | 110.211 | 79.113 | 0.00 | 0.00 |
| ATOM | 34048 | C    | HIE | 2273 | 89.215 | 111.369 | 77.161 | 0.00 | 0.00 |
| ATOM | 34049 | O    | HIE | 2273 | 90.126 | 111.040 | 77.848 | 0.00 | 0.00 |
| ATOM | 34050 | N    | ASN | 2274 | 89.256 | 111.205 | 75.833 | 0.00 | 0.00 |
| ATOM | 34051 | H    | ASN | 2274 | 88.539 | 111.696 | 75.318 | 0.00 | 0.00 |

|            |      |          |        |         |        |      |      |
|------------|------|----------|--------|---------|--------|------|------|
| ATOM 34052 | CA   | ASN 2274 | 90.224 | 110.368 | 75.083 | 0.00 | 0.00 |
| ATOM 34053 | HA   | ASN 2274 | 91.057 | 110.127 | 75.744 | 0.00 | 0.00 |
| ATOM 34054 | CB   | ASN 2274 | 89.512 | 109.052 | 74.803 | 0.00 | 0.00 |
| ATOM 34055 | HB2  | ASN 2274 | 88.489 | 109.100 | 74.431 | 0.00 | 0.00 |
| ATOM 34056 | HB3  | ASN 2274 | 90.085 | 108.587 | 74.000 | 0.00 | 0.00 |
| ATOM 34057 | CG   | ASN 2274 | 89.553 | 108.181 | 75.992 | 0.00 | 0.00 |
| ATOM 34058 | OD1  | ASN 2274 | 90.521 | 107.497 | 76.309 | 0.00 | 0.00 |
| ATOM 34059 | ND2  | ASN 2274 | 88.508 | 108.029 | 76.743 | 0.00 | 0.00 |
| ATOM 34060 | 1HD2 | ASN 2274 | 88.500 | 107.365 | 77.504 | 0.00 | 0.00 |
| ATOM 34061 | 2HD2 | ASN 2274 | 87.696 | 108.615 | 76.613 | 0.00 | 0.00 |
| ATOM 34062 | C    | ASN 2274 | 90.863 | 111.113 | 73.878 | 0.00 | 0.00 |
| ATOM 34063 | O    | ASN 2274 | 91.152 | 110.449 | 72.888 | 0.00 | 0.00 |
| ATOM 34064 | N    | SER 2275 | 90.938 | 112.406 | 73.892 | 0.00 | 0.00 |
| ATOM 34065 | H    | SER 2275 | 90.757 | 112.829 | 74.791 | 0.00 | 0.00 |
| ATOM 34066 | CA   | SER 2275 | 91.339 | 113.287 | 72.773 | 0.00 | 0.00 |
| ATOM 34067 | HA   | SER 2275 | 91.281 | 112.581 | 71.945 | 0.00 | 0.00 |
| ATOM 34068 | CB   | SER 2275 | 90.321 | 114.434 | 72.546 | 0.00 | 0.00 |
| ATOM 34069 | HB2  | SER 2275 | 90.440 | 115.081 | 73.415 | 0.00 | 0.00 |
| ATOM 34070 | HB3  | SER 2275 | 90.753 | 114.960 | 71.694 | 0.00 | 0.00 |
| ATOM 34071 | OG   | SER 2275 | 88.979 | 113.952 | 72.522 | 0.00 | 0.00 |
| ATOM 34072 | HG   | SER 2275 | 88.964 | 113.207 | 71.917 | 0.00 | 0.00 |
| ATOM 34073 | C    | SER 2275 | 92.741 | 113.892 | 72.726 | 0.00 | 0.00 |
| ATOM 34074 | O    | SER 2275 | 93.126 | 114.644 | 71.888 | 0.00 | 0.00 |
| ATOM 34075 | N    | LEU 2276 | 93.567 | 113.477 | 73.717 | 0.00 | 0.00 |
| ATOM 34076 | H    | LEU 2276 | 93.302 | 112.659 | 74.247 | 0.00 | 0.00 |
| ATOM 34077 | CA   | LEU 2276 | 94.954 | 114.015 | 73.877 | 0.00 | 0.00 |

|            |      |     |      |        |         |        |      |      |
|------------|------|-----|------|--------|---------|--------|------|------|
| ATOM 34078 | HA   | LEU | 2276 | 95.025 | 115.100 | 73.798 | 0.00 | 0.00 |
| ATOM 34079 | CB   | LEU | 2276 | 95.536 | 113.536 | 75.202 | 0.00 | 0.00 |
| ATOM 34080 | HB2  | LEU | 2276 | 94.851 | 113.849 | 75.989 | 0.00 | 0.00 |
| ATOM 34081 | HB3  | LEU | 2276 | 95.543 | 112.448 | 75.139 | 0.00 | 0.00 |
| ATOM 34082 | CG   | LEU | 2276 | 96.987 | 114.143 | 75.480 | 0.00 | 0.00 |
| ATOM 34083 | HG   | LEU | 2276 | 97.714 | 114.003 | 74.679 | 0.00 | 0.00 |
| ATOM 34084 | CD1  | LEU | 2276 | 96.886 | 115.656 | 75.736 | 0.00 | 0.00 |
| ATOM 34085 | 1HD1 | LEU | 2276 | 96.268 | 115.897 | 76.601 | 0.00 | 0.00 |
| ATOM 34086 | 2HD1 | LEU | 2276 | 97.880 | 116.087 | 75.860 | 0.00 | 0.00 |
| ATOM 34087 | 3HD1 | LEU | 2276 | 96.437 | 116.164 | 74.882 | 0.00 | 0.00 |
| ATOM 34088 | CD2  | LEU | 2276 | 97.528 | 113.354 | 76.669 | 0.00 | 0.00 |
| ATOM 34089 | 1HD2 | LEU | 2276 | 98.571 | 113.628 | 76.822 | 0.00 | 0.00 |
| ATOM 34090 | 2HD2 | LEU | 2276 | 97.021 | 113.661 | 77.584 | 0.00 | 0.00 |
| ATOM 34091 | 3HD2 | LEU | 2276 | 97.462 | 112.276 | 76.526 | 0.00 | 0.00 |
| ATOM 34092 | C    | LEU | 2276 | 95.838 | 113.607 | 72.662 | 0.00 | 0.00 |
| ATOM 34093 | O    | LEU | 2276 | 96.026 | 112.476 | 72.294 | 0.00 | 0.00 |
| ATOM 34094 | N    | GLN | 2277 | 96.488 | 114.663 | 72.056 | 0.00 | 0.00 |
| ATOM 34095 | H    | GLN | 2277 | 96.383 | 115.580 | 72.466 | 0.00 | 0.00 |
| ATOM 34096 | CA   | GLN | 2277 | 97.480 | 114.675 | 70.944 | 0.00 | 0.00 |
| ATOM 34097 | HA   | GLN | 2277 | 97.390 | 113.670 | 70.532 | 0.00 | 0.00 |
| ATOM 34098 | CB   | GLN | 2277 | 97.074 | 115.730 | 69.870 | 0.00 | 0.00 |
| ATOM 34099 | HB2  | GLN | 2277 | 97.469 | 116.736 | 70.009 | 0.00 | 0.00 |
| ATOM 34100 | HB3  | GLN | 2277 | 97.669 | 115.457 | 68.999 | 0.00 | 0.00 |
| ATOM 34101 | CG   | GLN | 2277 | 95.621 | 115.678 | 69.347 | 0.00 | 0.00 |
| ATOM 34102 | HG2  | GLN | 2277 | 95.445 | 114.604 | 69.282 | 0.00 | 0.00 |
| ATOM 34103 | HG3  | GLN | 2277 | 94.957 | 116.074 | 70.115 | 0.00 | 0.00 |

|      |       |      |     |      |         |         |        |      |      |
|------|-------|------|-----|------|---------|---------|--------|------|------|
| ATOM | 34104 | CD   | GLN | 2277 | 95.414  | 116.395 | 68.067 | 0.00 | 0.00 |
| ATOM | 34105 | OE1  | GLN | 2277 | 96.193  | 116.929 | 67.396 | 0.00 | 0.00 |
| ATOM | 34106 | NE2  | GLN | 2277 | 94.141  | 116.442 | 67.694 | 0.00 | 0.00 |
| ATOM | 34107 | 1HE2 | GLN | 2277 | 93.966  | 117.125 | 66.970 | 0.00 | 0.00 |
| ATOM | 34108 | 2HE2 | GLN | 2277 | 93.364  | 116.085 | 68.231 | 0.00 | 0.00 |
| ATOM | 34109 | C    | GLN | 2277 | 98.988  | 114.780 | 71.454 | 0.00 | 0.00 |
| ATOM | 34110 | O    | GLN | 2277 | 99.607  | 115.854 | 71.254 | 0.00 | 0.00 |
| ATOM | 34111 | N    | PRO | 2278 | 99.548  | 113.763 | 72.169 | 0.00 | 0.00 |
| ATOM | 34112 | CD   | PRO | 2278 | 99.025  | 112.387 | 72.344 | 0.00 | 0.00 |
| ATOM | 34113 | HD2  | PRO | 2278 | 98.182  | 112.525 | 73.022 | 0.00 | 0.00 |
| ATOM | 34114 | HD3  | PRO | 2278 | 98.579  | 111.973 | 71.440 | 0.00 | 0.00 |
| ATOM | 34115 | CG   | PRO | 2278 | 100.194 | 111.636 | 72.975 | 0.00 | 0.00 |
| ATOM | 34116 | HG2  | PRO | 2278 | 99.831  | 110.825 | 73.607 | 0.00 | 0.00 |
| ATOM | 34117 | HG3  | PRO | 2278 | 100.852 | 111.260 | 72.191 | 0.00 | 0.00 |
| ATOM | 34118 | CB   | PRO | 2278 | 100.914 | 112.718 | 73.783 | 0.00 | 0.00 |
| ATOM | 34119 | HB2  | PRO | 2278 | 100.380 | 112.935 | 74.708 | 0.00 | 0.00 |
| ATOM | 34120 | HB3  | PRO | 2278 | 101.965 | 112.528 | 73.997 | 0.00 | 0.00 |
| ATOM | 34121 | CA   | PRO | 2278 | 100.809 | 113.934 | 72.913 | 0.00 | 0.00 |
| ATOM | 34122 | HA   | PRO | 2278 | 100.696 | 114.817 | 73.543 | 0.00 | 0.00 |
| ATOM | 34123 | C    | PRO | 2278 | 102.080 | 114.232 | 72.087 | 0.00 | 0.00 |
| ATOM | 34124 | O    | PRO | 2278 | 102.245 | 113.760 | 70.954 | 0.00 | 0.00 |
| ATOM | 34125 | N    | ASN | 2279 | 103.004 | 114.835 | 72.793 | 0.00 | 0.00 |
| ATOM | 34126 | H    | ASN | 2279 | 102.742 | 115.114 | 73.728 | 0.00 | 0.00 |
| ATOM | 34127 | CA   | ASN | 2279 | 104.408 | 115.150 | 72.305 | 0.00 | 0.00 |
| ATOM | 34128 | HA   | ASN | 2279 | 104.400 | 115.363 | 71.236 | 0.00 | 0.00 |
| ATOM | 34129 | CB   | ASN | 2279 | 104.984 | 116.396 | 72.929 | 0.00 | 0.00 |

|      |       |          |      |         |         |        |      |      |
|------|-------|----------|------|---------|---------|--------|------|------|
| ATOM | 34130 | HB2 ASN  | 2279 | 104.307 | 117.153 | 72.532 | 0.00 | 0.00 |
| ATOM | 34131 | HB3 ASN  | 2279 | 104.950 | 116.329 | 74.017 | 0.00 | 0.00 |
| ATOM | 34132 | CG ASN   | 2279 | 106.444 | 116.793 | 72.642 | 0.00 | 0.00 |
| ATOM | 34133 | OD1 ASN  | 2279 | 107.123 | 116.193 | 71.858 | 0.00 | 0.00 |
| ATOM | 34134 | ND2 ASN  | 2279 | 106.825 | 117.970 | 73.149 | 0.00 | 0.00 |
| ATOM | 34135 | 1HD2 ASN | 2279 | 107.724 | 118.369 | 72.919 | 0.00 | 0.00 |
| ATOM | 34136 | 2HD2 ASN | 2279 | 106.127 | 118.497 | 73.654 | 0.00 | 0.00 |
| ATOM | 34137 | C ASN    | 2279 | 105.259 | 113.944 | 72.627 | 0.00 | 0.00 |
| ATOM | 34138 | O ASN    | 2279 | 106.089 | 113.915 | 73.513 | 0.00 | 0.00 |
| ATOM | 34139 | N ILE    | 2280 | 104.831 | 112.867 | 71.927 | 0.00 | 0.00 |
| ATOM | 34140 | H ILE    | 2280 | 104.064 | 112.893 | 71.272 | 0.00 | 0.00 |
| ATOM | 34141 | CA ILE   | 2280 | 105.309 | 111.506 | 72.207 | 0.00 | 0.00 |
| ATOM | 34142 | HA ILE   | 2280 | 105.772 | 111.483 | 73.193 | 0.00 | 0.00 |
| ATOM | 34143 | CB ILE   | 2280 | 104.112 | 110.511 | 72.272 | 0.00 | 0.00 |
| ATOM | 34144 | HB ILE   | 2280 | 103.524 | 110.974 | 73.065 | 0.00 | 0.00 |
| ATOM | 34145 | CG2 ILE  | 2280 | 103.399 | 110.446 | 70.895 | 0.00 | 0.00 |
| ATOM | 34146 | 1HG2 ILE | 2280 | 102.982 | 111.398 | 70.567 | 0.00 | 0.00 |
| ATOM | 34147 | 2HG2 ILE | 2280 | 104.113 | 109.928 | 70.255 | 0.00 | 0.00 |
| ATOM | 34148 | 3HG2 ILE | 2280 | 102.622 | 109.681 | 70.902 | 0.00 | 0.00 |
| ATOM | 34149 | CG1 ILE  | 2280 | 104.457 | 109.110 | 72.708 | 0.00 | 0.00 |
| ATOM | 34150 | 2HG1 ILE | 2280 | 105.072 | 108.700 | 71.907 | 0.00 | 0.00 |
| ATOM | 34151 | 3HG1 ILE | 2280 | 105.074 | 109.144 | 73.606 | 0.00 | 0.00 |
| ATOM | 34152 | CD1 ILE  | 2280 | 103.247 | 108.309 | 73.115 | 0.00 | 0.00 |
| ATOM | 34153 | 1HD1 ILE | 2280 | 102.814 | 108.873 | 73.941 | 0.00 | 0.00 |
| ATOM | 34154 | 2HD1 ILE | 2280 | 102.583 | 108.063 | 72.287 | 0.00 | 0.00 |
| ATOM | 34155 | 3HD1 ILE | 2280 | 103.569 | 107.333 | 73.481 | 0.00 | 0.00 |

ATOM 34156 C ILE 2280 106.399 111.011 71.198 0.00 0.00  
ATOM 34157 O ILE 2280 106.355 111.178 69.992 0.00 0.00  
ATOM 34158 N THR 2281 107.365 110.289 71.740 0.00 0.00  
ATOM 34159 H THR 2281 107.293 110.305 72.747 0.00 0.00  
ATOM 34160 CA THR 2281 108.537 109.790 71.041 0.00 0.00  
ATOM 34161 HA THR 2281 108.241 109.590 70.011 0.00 0.00  
ATOM 34162 CB THR 2281 109.715 110.730 71.089 0.00 0.00  
ATOM 34163 HB THR 2281 110.526 110.379 70.451 0.00 0.00  
ATOM 34164 CG2 THR 2281 109.358 112.059 70.472 0.00 0.00  
ATOM 34165 1HG2 THR 2281 108.738 112.574 71.206 0.00 0.00  
ATOM 34166 2HG2 THR 2281 110.223 112.692 70.276 0.00 0.00  
ATOM 34167 3HG2 THR 2281 108.770 111.799 69.592 0.00 0.00  
ATOM 34168 OG1 THR 2281 110.207 110.901 72.387 0.00 0.00  
ATOM 34169 HG1 THR 2281 110.871 111.577 72.232 0.00 0.00  
ATOM 34170 C THR 2281 109.057 108.500 71.601 0.00 0.00  
ATOM 34171 O THR 2281 109.000 108.238 72.783 0.00 0.00  
ATOM 34172 N VAL 2282 109.792 107.796 70.740 0.00 0.00  
ATOM 34173 H VAL 2282 109.768 107.989 69.749 0.00 0.00  
ATOM 34174 CA VAL 2282 110.609 106.660 71.089 0.00 0.00  
ATOM 34175 HA VAL 2282 110.718 106.629 72.173 0.00 0.00  
ATOM 34176 CB VAL 2282 109.915 105.311 70.872 0.00 0.00  
ATOM 34177 HB VAL 2282 108.982 105.270 71.433 0.00 0.00  
ATOM 34178 CG1 VAL 2282 109.582 105.043 69.432 0.00 0.00  
ATOM 34179 1HG1 VAL 2282 109.216 105.895 68.859 0.00 0.00  
ATOM 34180 2HG1 VAL 2282 110.509 104.744 68.942 0.00 0.00  
ATOM 34181 3HG1 VAL 2282 108.898 104.201 69.320 0.00 0.00

|      |       |      |     |      |         |         |        |      |      |
|------|-------|------|-----|------|---------|---------|--------|------|------|
| ATOM | 34182 | CG2  | VAL | 2282 | 110.769 | 104.149 | 71.433 | 0.00 | 0.00 |
| ATOM | 34183 | 1HG2 | VAL | 2282 | 110.159 | 103.255 | 71.567 | 0.00 | 0.00 |
| ATOM | 34184 | 2HG2 | VAL | 2282 | 111.519 | 103.795 | 70.727 | 0.00 | 0.00 |
| ATOM | 34185 | 3HG2 | VAL | 2282 | 111.243 | 104.391 | 72.384 | 0.00 | 0.00 |
| ATOM | 34186 | C    | VAL | 2282 | 111.933 | 106.716 | 70.428 | 0.00 | 0.00 |
| ATOM | 34187 | O    | VAL | 2282 | 112.017 | 106.847 | 69.220 | 0.00 | 0.00 |
| ATOM | 34188 | N    | ASP | 2283 | 113.019 | 106.464 | 71.168 | 0.00 | 0.00 |
| ATOM | 34189 | H    | ASP | 2283 | 112.934 | 106.238 | 72.149 | 0.00 | 0.00 |
| ATOM | 34190 | CA   | ASP | 2283 | 114.347 | 106.176 | 70.573 | 0.00 | 0.00 |
| ATOM | 34191 | HA   | ASP | 2283 | 114.509 | 106.820 | 69.708 | 0.00 | 0.00 |
| ATOM | 34192 | CB   | ASP | 2283 | 115.501 | 106.662 | 71.549 | 0.00 | 0.00 |
| ATOM | 34193 | HB2  | ASP | 2283 | 115.187 | 107.692 | 71.720 | 0.00 | 0.00 |
| ATOM | 34194 | HB3  | ASP | 2283 | 115.463 | 106.131 | 72.501 | 0.00 | 0.00 |
| ATOM | 34195 | CG   | ASP | 2283 | 116.908 | 106.412 | 71.038 | 0.00 | 0.00 |
| ATOM | 34196 | OD1  | ASP | 2283 | 117.395 | 107.291 | 70.333 | 0.00 | 0.00 |
| ATOM | 34197 | OD2  | ASP | 2283 | 117.604 | 105.397 | 71.367 | 0.00 | 0.00 |
| ATOM | 34198 | C    | ASP | 2283 | 114.445 | 104.757 | 70.018 | 0.00 | 0.00 |
| ATOM | 34199 | O    | ASP | 2283 | 114.188 | 103.825 | 70.771 | 0.00 | 0.00 |
| ATOM | 34200 | N    | ALA | 2284 | 114.762 | 104.614 | 68.692 | 0.00 | 0.00 |
| ATOM | 34201 | H    | ALA | 2284 | 114.942 | 105.440 | 68.140 | 0.00 | 0.00 |
| ATOM | 34202 | CA   | ALA | 2284 | 114.923 | 103.356 | 67.959 | 0.00 | 0.00 |
| ATOM | 34203 | HA   | ALA | 2284 | 114.008 | 102.805 | 68.177 | 0.00 | 0.00 |
| ATOM | 34204 | CB   | ALA | 2284 | 115.095 | 103.524 | 66.419 | 0.00 | 0.00 |
| ATOM | 34205 | HB1  | ALA | 2284 | 115.110 | 102.558 | 65.914 | 0.00 | 0.00 |
| ATOM | 34206 | HB2  | ALA | 2284 | 114.242 | 104.092 | 66.047 | 0.00 | 0.00 |
| ATOM | 34207 | HB3  | ALA | 2284 | 116.062 | 104.026 | 66.384 | 0.00 | 0.00 |

|      |       |      |     |      |         |         |        |      |      |
|------|-------|------|-----|------|---------|---------|--------|------|------|
| ATOM | 34208 | C    | ALA | 2284 | 116.195 | 102.491 | 68.402 | 0.00 | 0.00 |
| ATOM | 34209 | O    | ALA | 2284 | 116.245 | 101.331 | 68.061 | 0.00 | 0.00 |
| ATOM | 34210 | N    | GLN | 2285 | 117.092 | 102.959 | 69.211 | 0.00 | 0.00 |
| ATOM | 34211 | H    | GLN | 2285 | 117.045 | 103.946 | 69.417 | 0.00 | 0.00 |
| ATOM | 34212 | CA   | GLN | 2285 | 118.244 | 102.217 | 69.774 | 0.00 | 0.00 |
| ATOM | 34213 | HA   | GLN | 2285 | 118.458 | 101.316 | 69.199 | 0.00 | 0.00 |
| ATOM | 34214 | CB   | GLN | 2285 | 119.427 | 103.099 | 69.599 | 0.00 | 0.00 |
| ATOM | 34215 | HB2  | GLN | 2285 | 119.232 | 104.130 | 69.893 | 0.00 | 0.00 |
| ATOM | 34216 | HB3  | GLN | 2285 | 120.155 | 102.653 | 70.276 | 0.00 | 0.00 |
| ATOM | 34217 | CG   | GLN | 2285 | 120.021 | 103.070 | 68.195 | 0.00 | 0.00 |
| ATOM | 34218 | HG2  | GLN | 2285 | 121.065 | 103.383 | 68.195 | 0.00 | 0.00 |
| ATOM | 34219 | HG3  | GLN | 2285 | 120.019 | 102.065 | 67.773 | 0.00 | 0.00 |
| ATOM | 34220 | CD   | GLN | 2285 | 119.278 | 103.888 | 67.187 | 0.00 | 0.00 |
| ATOM | 34221 | OE1  | GLN | 2285 | 118.487 | 103.389 | 66.387 | 0.00 | 0.00 |
| ATOM | 34222 | NE2  | GLN | 2285 | 119.338 | 105.182 | 67.352 | 0.00 | 0.00 |
| ATOM | 34223 | 1HE2 | GLN | 2285 | 118.593 | 105.638 | 66.846 | 0.00 | 0.00 |
| ATOM | 34224 | 2HE2 | GLN | 2285 | 119.870 | 105.572 | 68.116 | 0.00 | 0.00 |
| ATOM | 34225 | C    | GLN | 2285 | 118.095 | 101.648 | 71.210 | 0.00 | 0.00 |
| ATOM | 34226 | O    | GLN | 2285 | 118.327 | 100.455 | 71.487 | 0.00 | 0.00 |
| ATOM | 34227 | N    | THR | 2286 | 117.638 | 102.542 | 72.040 | 0.00 | 0.00 |
| ATOM | 34228 | H    | THR | 2286 | 117.611 | 103.500 | 71.720 | 0.00 | 0.00 |
| ATOM | 34229 | CA   | THR | 2286 | 117.415 | 102.331 | 73.446 | 0.00 | 0.00 |
| ATOM | 34230 | HA   | THR | 2286 | 118.218 | 101.691 | 73.811 | 0.00 | 0.00 |
| ATOM | 34231 | CB   | THR | 2286 | 117.613 | 103.616 | 74.265 | 0.00 | 0.00 |
| ATOM | 34232 | HB   | THR | 2286 | 117.372 | 103.376 | 75.301 | 0.00 | 0.00 |
| ATOM | 34233 | CG2  | THR | 2286 | 119.062 | 104.113 | 74.222 | 0.00 | 0.00 |



|      |       |      |     |      |         |         |        |      |      |
|------|-------|------|-----|------|---------|---------|--------|------|------|
| ATOM | 34234 | 1HG2 | THR | 2286 | 119.035 | 105.047 | 74.784 | 0.00 | 0.00 |
| ATOM | 34235 | 2HG2 | THR | 2286 | 119.801 | 103.518 | 74.758 | 0.00 | 0.00 |
| ATOM | 34236 | 3HG2 | THR | 2286 | 119.438 | 104.263 | 73.210 | 0.00 | 0.00 |
| ATOM | 34237 | OG1  | THR | 2286 | 116.837 | 104.641 | 73.782 | 0.00 | 0.00 |
| ATOM | 34238 | HG1  | THR | 2286 | 117.145 | 104.892 | 72.908 | 0.00 | 0.00 |
| ATOM | 34239 | C    | THR | 2286 | 115.999 | 101.778 | 73.726 | 0.00 | 0.00 |
| ATOM | 34240 | O    | THR | 2286 | 115.864 | 101.082 | 74.752 | 0.00 | 0.00 |
| ATOM | 34241 | N    | TYR | 2287 | 115.002 | 101.926 | 72.874 | 0.00 | 0.00 |
| ATOM | 34242 | H    | TYR | 2287 | 115.101 | 102.551 | 72.087 | 0.00 | 0.00 |
| ATOM | 34243 | CA   | TYR | 2287 | 113.590 | 101.630 | 73.237 | 0.00 | 0.00 |
| ATOM | 34244 | HA   | TYR | 2287 | 112.862 | 102.124 | 72.594 | 0.00 | 0.00 |
| ATOM | 34245 | CB   | TYR | 2287 | 113.261 | 100.139 | 73.138 | 0.00 | 0.00 |
| ATOM | 34246 | HB2  | TYR | 2287 | 113.744 | 99.676  | 73.999 | 0.00 | 0.00 |
| ATOM | 34247 | HB3  | TYR | 2287 | 112.189 | 99.943  | 73.131 | 0.00 | 0.00 |
| ATOM | 34248 | CG   | TYR | 2287 | 113.747 | 99.505  | 71.890 | 0.00 | 0.00 |
| ATOM | 34249 | CD1  | TYR | 2287 | 113.306 | 100.009 | 70.661 | 0.00 | 0.00 |
| ATOM | 34250 | HD1  | TYR | 2287 | 112.553 | 100.775 | 70.553 | 0.00 | 0.00 |
| ATOM | 34251 | CE1  | TYR | 2287 | 113.794 | 99.364  | 69.499 | 0.00 | 0.00 |
| ATOM | 34252 | HE1  | TYR | 2287 | 113.546 | 99.820  | 68.552 | 0.00 | 0.00 |
| ATOM | 34253 | CZ   | TYR | 2287 | 114.503 | 98.179  | 69.546 | 0.00 | 0.00 |
| ATOM | 34254 | OH   | TYR | 2287 | 114.827 | 97.412  | 68.459 | 0.00 | 0.00 |
| ATOM | 34255 | HH   | TYR | 2287 | 114.229 | 97.622  | 67.739 | 0.00 | 0.00 |
| ATOM | 34256 | CE2  | TYR | 2287 | 115.000 | 97.720  | 70.759 | 0.00 | 0.00 |
| ATOM | 34257 | HE2  | TYR | 2287 | 115.619 | 96.835  | 70.780 | 0.00 | 0.00 |
| ATOM | 34258 | CD2  | TYR | 2287 | 114.639 | 98.423  | 71.949 | 0.00 | 0.00 |
| ATOM | 34259 | HD2  | TYR | 2287 | 115.067 | 98.185  | 72.912 | 0.00 | 0.00 |

|      |       |      |     |      |         |         |        |      |      |
|------|-------|------|-----|------|---------|---------|--------|------|------|
| ATOM | 34260 | C    | TYR | 2287 | 113.178 | 102.328 | 74.520 | 0.00 | 0.00 |
| ATOM | 34261 | O    | TYR | 2287 | 112.710 | 101.742 | 75.502 | 0.00 | 0.00 |
| ATOM | 34262 | N    | GLU | 2288 | 113.341 | 103.660 | 74.529 | 0.00 | 0.00 |
| ATOM | 34263 | H    | GLU | 2288 | 113.873 | 104.075 | 73.777 | 0.00 | 0.00 |
| ATOM | 34264 | CA   | GLU | 2288 | 112.881 | 104.458 | 75.555 | 0.00 | 0.00 |
| ATOM | 34265 | HA   | GLU | 2288 | 112.513 | 103.866 | 76.393 | 0.00 | 0.00 |
| ATOM | 34266 | CB   | GLU | 2288 | 114.117 | 105.228 | 76.204 | 0.00 | 0.00 |
| ATOM | 34267 | HB2  | GLU | 2288 | 114.746 | 104.414 | 76.565 | 0.00 | 0.00 |
| ATOM | 34268 | HB3  | GLU | 2288 | 114.526 | 105.946 | 75.493 | 0.00 | 0.00 |
| ATOM | 34269 | CG   | GLU | 2288 | 113.755 | 105.932 | 77.505 | 0.00 | 0.00 |
| ATOM | 34270 | HG2  | GLU | 2288 | 113.064 | 106.770 | 77.419 | 0.00 | 0.00 |
| ATOM | 34271 | HG3  | GLU | 2288 | 113.195 | 105.270 | 78.166 | 0.00 | 0.00 |
| ATOM | 34272 | CD   | GLU | 2288 | 114.964 | 106.562 | 78.226 | 0.00 | 0.00 |
| ATOM | 34273 | OE1  | GLU | 2288 | 115.332 | 106.200 | 79.408 | 0.00 | 0.00 |
| ATOM | 34274 | OE2  | GLU | 2288 | 115.525 | 107.502 | 77.606 | 0.00 | 0.00 |
| ATOM | 34275 | C    | GLU | 2288 | 111.833 | 105.427 | 75.108 | 0.00 | 0.00 |
| ATOM | 34276 | O    | GLU | 2288 | 112.019 | 106.127 | 74.077 | 0.00 | 0.00 |
| ATOM | 34277 | N    | VAL | 2289 | 110.668 | 105.388 | 75.756 | 0.00 | 0.00 |
| ATOM | 34278 | H    | VAL | 2289 | 110.573 | 104.903 | 76.637 | 0.00 | 0.00 |
| ATOM | 34279 | CA   | VAL | 2289 | 109.495 | 106.107 | 75.292 | 0.00 | 0.00 |
| ATOM | 34280 | HA   | VAL | 2289 | 109.456 | 106.368 | 74.234 | 0.00 | 0.00 |
| ATOM | 34281 | CB   | VAL | 2289 | 108.313 | 105.195 | 75.575 | 0.00 | 0.00 |
| ATOM | 34282 | HB   | VAL | 2289 | 108.253 | 105.040 | 76.652 | 0.00 | 0.00 |
| ATOM | 34283 | CG1  | VAL | 2289 | 107.002 | 105.918 | 75.344 | 0.00 | 0.00 |
| ATOM | 34284 | 1HG1 | VAL | 2289 | 106.205 | 105.233 | 75.635 | 0.00 | 0.00 |
| ATOM | 34285 | 2HG1 | VAL | 2289 | 106.860 | 106.828 | 75.927 | 0.00 | 0.00 |

ATOM 34286 3HG1 VAL 2289 106.897 106.105 74.276 0.00 0.00  
ATOM 34287 CG2 VAL 2289 108.451 103.886 74.801 0.00 0.00  
ATOM 34288 1HG2 VAL 2289 109.343 103.323 75.078 0.00 0.00  
ATOM 34289 2HG2 VAL 2289 107.593 103.238 74.981 0.00 0.00  
ATOM 34290 3HG2 VAL 2289 108.558 104.052 73.729 0.00 0.00  
ATOM 34291 C VAL 2289 109.381 107.382 76.169 0.00 0.00  
ATOM 34292 O VAL 2289 109.525 107.231 77.422 0.00 0.00  
ATOM 34293 N ARG 2290 109.175 108.576 75.565 0.00 0.00  
ATOM 34294 H ARG 2290 109.009 108.516 74.570 0.00 0.00  
ATOM 34295 CA ARG 2290 108.973 109.823 76.370 0.00 0.00  
ATOM 34296 HA ARG 2290 108.759 109.611 77.418 0.00 0.00  
ATOM 34297 CB ARG 2290 110.341 110.601 76.333 0.00 0.00  
ATOM 34298 HB2 ARG 2290 110.690 110.604 75.301 0.00 0.00  
ATOM 34299 HB3 ARG 2290 110.166 111.606 76.717 0.00 0.00  
ATOM 34300 CG ARG 2290 111.397 109.986 77.261 0.00 0.00  
ATOM 34301 HG2 ARG 2290 111.135 110.050 78.317 0.00 0.00  
ATOM 34302 HG3 ARG 2290 111.471 108.902 77.169 0.00 0.00  
ATOM 34303 CD ARG 2290 112.806 110.589 76.955 0.00 0.00  
ATOM 34304 HD2 ARG 2290 113.120 110.426 75.925 0.00 0.00  
ATOM 34305 HD3 ARG 2290 112.866 111.642 77.228 0.00 0.00  
ATOM 34306 NE ARG 2290 113.779 109.965 77.909 0.00 0.00  
ATOM 34307 HE ARG 2290 114.302 109.151 77.618 0.00 0.00  
ATOM 34308 CZ ARG 2290 113.939 110.246 79.236 0.00 0.00  
ATOM 34309 NH1 ARG 2290 113.418 111.203 79.913 0.00 0.00  
ATOM 34310 1HH1 ARG 2290 113.484 111.391 80.903 0.00 0.00  
ATOM 34311 2HH1 ARG 2290 112.827 111.777 79.329 0.00 0.00

ATOM 34312 NH2 ARG 2290 114.641 109.382 79.894 0.00 0.00  
ATOM 34313 1HH2 ARG 2290 114.688 109.430 80.902 0.00 0.00  
ATOM 34314 2HH2 ARG 2290 115.072 108.557 79.500 0.00 0.00  
ATOM 34315 C ARG 2290 107.861 110.702 75.829 0.00 0.00  
ATOM 34316 O ARG 2290 107.347 110.592 74.702 0.00 0.00  
ATOM 34317 N VAL 2291 107.318 111.548 76.711 0.00 0.00  
ATOM 34318 H VAL 2291 107.806 111.597 77.594 0.00 0.00  
ATOM 34319 CA VAL 2291 106.279 112.503 76.394 0.00 0.00  
ATOM 34320 HA VAL 2291 106.195 112.574 75.309 0.00 0.00  
ATOM 34321 CB VAL 2291 104.877 111.995 76.946 0.00 0.00  
ATOM 34322 HB VAL 2291 105.103 111.661 77.959 0.00 0.00  
ATOM 34323 CG1 VAL 2291 103.691 112.982 77.014 0.00 0.00  
ATOM 34324 1HG1 VAL 2291 102.845 112.474 77.476 0.00 0.00  
ATOM 34325 2HG1 VAL 2291 103.919 113.877 77.592 0.00 0.00  
ATOM 34326 3HG1 VAL 2291 103.431 113.119 75.964 0.00 0.00  
ATOM 34327 CG2 VAL 2291 104.443 110.715 76.184 0.00 0.00  
ATOM 34328 1HG2 VAL 2291 104.580 110.816 75.107 0.00 0.00  
ATOM 34329 2HG2 VAL 2291 105.165 109.917 76.356 0.00 0.00  
ATOM 34330 3HG2 VAL 2291 103.470 110.396 76.560 0.00 0.00  
ATOM 34331 C VAL 2291 106.608 113.914 77.004 0.00 0.00  
ATOM 34332 O VAL 2291 106.583 114.121 78.208 0.00 0.00  
ATOM 34333 N ASP 2292 106.910 114.794 76.071 0.00 0.00  
ATOM 34334 H ASP 2292 106.980 114.499 75.107 0.00 0.00  
ATOM 34335 CA ASP 2292 107.513 116.091 76.376 0.00 0.00  
ATOM 34336 HA ASP 2292 107.445 116.574 75.401 0.00 0.00  
ATOM 34337 CB ASP 2292 106.532 117.001 77.185 0.00 0.00

|      |       |     |     |      |         |         |        |      |      |
|------|-------|-----|-----|------|---------|---------|--------|------|------|
| ATOM | 34338 | HB2 | ASP | 2292 | 105.512 | 117.001 | 76.801 | 0.00 | 0.00 |
| ATOM | 34339 | HB3 | ASP | 2292 | 106.437 | 116.671 | 78.219 | 0.00 | 0.00 |
| ATOM | 34340 | CG  | ASP | 2292 | 106.991 | 118.414 | 77.173 | 0.00 | 0.00 |
| ATOM | 34341 | OD1 | ASP | 2292 | 106.898 | 119.045 | 78.289 | 0.00 | 0.00 |
| ATOM | 34342 | OD2 | ASP | 2292 | 107.338 | 119.055 | 76.119 | 0.00 | 0.00 |
| ATOM | 34343 | C   | ASP | 2292 | 108.999 | 115.975 | 76.860 | 0.00 | 0.00 |
| ATOM | 34344 | O   | ASP | 2292 | 109.521 | 116.846 | 77.552 | 0.00 | 0.00 |
| ATOM | 34345 | N   | GLY | 2293 | 109.670 | 114.889 | 76.436 | 0.00 | 0.00 |
| ATOM | 34346 | H   | GLY | 2293 | 109.220 | 114.312 | 75.740 | 0.00 | 0.00 |
| ATOM | 34347 | CA  | GLY | 2293 | 110.945 | 114.540 | 77.033 | 0.00 | 0.00 |
| ATOM | 34348 | HA2 | GLY | 2293 | 111.465 | 113.835 | 76.385 | 0.00 | 0.00 |
| ATOM | 34349 | HA3 | GLY | 2293 | 111.553 | 115.441 | 77.121 | 0.00 | 0.00 |
| ATOM | 34350 | C   | GLY | 2293 | 110.925 | 113.748 | 78.336 | 0.00 | 0.00 |
| ATOM | 34351 | O   | GLY | 2293 | 111.920 | 113.238 | 78.814 | 0.00 | 0.00 |
| ATOM | 34352 | N   | GLU | 2294 | 109.762 | 113.659 | 78.964 | 0.00 | 0.00 |
| ATOM | 34353 | H   | GLU | 2294 | 108.987 | 114.026 | 78.431 | 0.00 | 0.00 |
| ATOM | 34354 | CA  | GLU | 2294 | 109.567 | 112.976 | 80.264 | 0.00 | 0.00 |
| ATOM | 34355 | HA  | GLU | 2294 | 110.498 | 112.992 | 80.829 | 0.00 | 0.00 |
| ATOM | 34356 | CB  | GLU | 2294 | 108.411 | 113.597 | 81.056 | 0.00 | 0.00 |
| ATOM | 34357 | HB2 | GLU | 2294 | 107.443 | 113.494 | 80.565 | 0.00 | 0.00 |
| ATOM | 34358 | HB3 | GLU | 2294 | 108.289 | 113.102 | 82.020 | 0.00 | 0.00 |
| ATOM | 34359 | CG  | GLU | 2294 | 108.601 | 115.120 | 81.263 | 0.00 | 0.00 |
| ATOM | 34360 | HG2 | GLU | 2294 | 109.583 | 115.173 | 81.732 | 0.00 | 0.00 |
| ATOM | 34361 | HG3 | GLU | 2294 | 108.571 | 115.663 | 80.318 | 0.00 | 0.00 |
| ATOM | 34362 | CD  | GLU | 2294 | 107.528 | 115.713 | 82.247 | 0.00 | 0.00 |
| ATOM | 34363 | OE1 | GLU | 2294 | 108.046 | 116.263 | 83.238 | 0.00 | 0.00 |

ATOM 34364 OE2 GLU 2294 106.337 115.555 82.174 0.00 0.00  
ATOM 34365 C GLU 2294 109.190 111.534 80.084 0.00 0.00  
ATOM 34366 O GLU 2294 108.656 111.156 79.012 0.00 0.00  
ATOM 34367 N LEU 2295 109.266 110.711 81.134 0.00 0.00  
ATOM 34368 H LEU 2295 109.774 111.068 81.930 0.00 0.00  
ATOM 34369 CA LEU 2295 108.788 109.299 81.207 0.00 0.00  
ATOM 34370 HA LEU 2295 108.688 108.933 80.185 0.00 0.00  
ATOM 34371 CB LEU 2295 109.743 108.438 81.980 0.00 0.00  
ATOM 34372 HB2 LEU 2295 109.781 108.799 83.008 0.00 0.00  
ATOM 34373 HB3 LEU 2295 109.318 107.436 82.038 0.00 0.00  
ATOM 34374 CG LEU 2295 111.244 108.365 81.436 0.00 0.00  
ATOM 34375 HG LEU 2295 111.567 109.367 81.153 0.00 0.00  
ATOM 34376 CD1 LEU 2295 112.164 107.743 82.470 0.00 0.00  
ATOM 34377 1HD1 LEU 2295 111.942 108.265 83.401 0.00 0.00  
ATOM 34378 2HD1 LEU 2295 111.908 106.702 82.670 0.00 0.00  
ATOM 34379 3HD1 LEU 2295 113.163 107.973 82.101 0.00 0.00  
ATOM 34380 CD2 LEU 2295 111.279 107.455 80.217 0.00 0.00  
ATOM 34381 1HD2 LEU 2295 112.302 107.332 79.861 0.00 0.00  
ATOM 34382 2HD2 LEU 2295 110.842 106.520 80.569 0.00 0.00  
ATOM 34383 3HD2 LEU 2295 110.670 107.861 79.409 0.00 0.00  
ATOM 34384 C LEU 2295 107.399 109.358 81.760 0.00 0.00  
ATOM 34385 O LEU 2295 107.063 110.159 82.659 0.00 0.00  
ATOM 34386 N ILE 2296 106.590 108.374 81.389 0.00 0.00  
ATOM 34387 H ILE 2296 106.953 107.715 80.715 0.00 0.00  
ATOM 34388 CA ILE 2296 105.341 108.010 82.001 0.00 0.00  
ATOM 34389 HA ILE 2296 105.331 108.587 82.925 0.00 0.00

ATOM 34390 CB ILE 2296 104.149 108.506 81.048 0.00 0.00  
ATOM 34391 HB ILE 2296 103.264 108.158 81.582 0.00 0.00  
ATOM 34392 CG2 ILE 2296 104.083 110.086 80.798 0.00 0.00  
ATOM 34393 1HG2 ILE 2296 103.157 110.329 80.276 0.00 0.00  
ATOM 34394 2HG2 ILE 2296 104.149 110.662 81.720 0.00 0.00  
ATOM 34395 3HG2 ILE 2296 104.905 110.314 80.120 0.00 0.00  
ATOM 34396 CG1 ILE 2296 104.244 107.755 79.663 0.00 0.00  
ATOM 34397 2HG1 ILE 2296 105.164 108.036 79.151 0.00 0.00  
ATOM 34398 3HG1 ILE 2296 104.325 106.672 79.754 0.00 0.00  
ATOM 34399 CD1 ILE 2296 103.110 108.000 78.635 0.00 0.00  
ATOM 34400 1HD1 ILE 2296 103.203 107.225 77.875 0.00 0.00  
ATOM 34401 2HD1 ILE 2296 102.097 107.932 79.033 0.00 0.00  
ATOM 34402 3HD1 ILE 2296 103.201 108.961 78.129 0.00 0.00  
ATOM 34403 C ILE 2296 105.282 106.537 82.381 0.00 0.00  
ATOM 34404 O ILE 2296 104.341 106.180 83.137 0.00 0.00  
ATOM 34405 N THR 2297 106.022 105.596 81.746 0.00 0.00  
ATOM 34406 H THR 2297 106.692 105.866 81.041 0.00 0.00  
ATOM 34407 CA THR 2297 105.976 104.199 82.090 0.00 0.00  
ATOM 34408 HA THR 2297 104.925 103.918 82.162 0.00 0.00  
ATOM 34409 CB THR 2297 106.560 103.215 81.005 0.00 0.00  
ATOM 34410 HB THR 2297 106.474 102.219 81.441 0.00 0.00  
ATOM 34411 CG2 THR 2297 105.878 103.268 79.669 0.00 0.00  
ATOM 34412 1HG2 THR 2297 105.923 104.261 79.222 0.00 0.00  
ATOM 34413 2HG2 THR 2297 106.152 102.507 78.938 0.00 0.00  
ATOM 34414 3HG2 THR 2297 104.798 103.192 79.789 0.00 0.00  
ATOM 34415 OG1 THR 2297 107.949 103.452 80.725 0.00 0.00

|      |       |     |     |      |         |         |        |      |      |
|------|-------|-----|-----|------|---------|---------|--------|------|------|
| ATOM | 34416 | HG1 | THR | 2297 | 108.319 | 102.681 | 80.288 | 0.00 | 0.00 |
| ATOM | 34417 | C   | THR | 2297 | 106.552 | 103.868 | 83.440 | 0.00 | 0.00 |
| ATOM | 34418 | O   | THR | 2297 | 107.355 | 104.673 | 83.907 | 0.00 | 0.00 |
| ATOM | 34419 | N   | SER | 2298 | 106.147 | 102.735 | 84.007 | 0.00 | 0.00 |
| ATOM | 34420 | H   | SER | 2298 | 105.679 | 102.010 | 83.482 | 0.00 | 0.00 |
| ATOM | 34421 | CA  | SER | 2298 | 106.552 | 102.258 | 85.372 | 0.00 | 0.00 |
| ATOM | 34422 | HA  | SER | 2298 | 107.615 | 102.492 | 85.440 | 0.00 | 0.00 |
| ATOM | 34423 | CB  | SER | 2298 | 105.771 | 102.906 | 86.488 | 0.00 | 0.00 |
| ATOM | 34424 | HB2 | SER | 2298 | 106.236 | 102.713 | 87.455 | 0.00 | 0.00 |
| ATOM | 34425 | HB3 | SER | 2298 | 105.772 | 103.982 | 86.314 | 0.00 | 0.00 |
| ATOM | 34426 | OG  | SER | 2298 | 104.445 | 102.448 | 86.620 | 0.00 | 0.00 |
| ATOM | 34427 | HG  | SER | 2298 | 103.893 | 102.917 | 85.990 | 0.00 | 0.00 |
| ATOM | 34428 | C   | SER | 2298 | 106.431 | 100.695 | 85.551 | 0.00 | 0.00 |
| ATOM | 34429 | O   | SER | 2298 | 105.647 | 100.041 | 84.877 | 0.00 | 0.00 |
| ATOM | 34430 | N   | GLU | 2299 | 107.282 | 100.231 | 86.354 | 0.00 | 0.00 |
| ATOM | 34431 | H   | GLU | 2299 | 107.841 | 100.947 | 86.796 | 0.00 | 0.00 |
| ATOM | 34432 | CA  | GLU | 2299 | 107.441 | 98.921  | 86.943 | 0.00 | 0.00 |
| ATOM | 34433 | HA  | GLU | 2299 | 108.373 | 98.487  | 86.581 | 0.00 | 0.00 |
| ATOM | 34434 | CB  | GLU | 2299 | 107.586 | 99.094  | 88.499 | 0.00 | 0.00 |
| ATOM | 34435 | HB2 | GLU | 2299 | 108.253 | 99.934  | 88.691 | 0.00 | 0.00 |
| ATOM | 34436 | HB3 | GLU | 2299 | 106.606 | 99.376  | 88.883 | 0.00 | 0.00 |
| ATOM | 34437 | CG  | GLU | 2299 | 108.075 | 97.891  | 89.286 | 0.00 | 0.00 |
| ATOM | 34438 | HG2 | GLU | 2299 | 107.451 | 97.027  | 89.056 | 0.00 | 0.00 |
| ATOM | 34439 | HG3 | GLU | 2299 | 109.035 | 97.682  | 88.816 | 0.00 | 0.00 |
| ATOM | 34440 | CD  | GLU | 2299 | 108.191 | 98.132  | 90.731 | 0.00 | 0.00 |
| ATOM | 34441 | OE1 | GLU | 2299 | 109.277 | 98.054  | 91.342 | 0.00 | 0.00 |



|      |       |     |     |      |         |        |        |      |      |
|------|-------|-----|-----|------|---------|--------|--------|------|------|
| ATOM | 34442 | OE2 | GLU | 2299 | 107.147 | 98.545 | 91.313 | 0.00 | 0.00 |
| ATOM | 34443 | C   | GLU | 2299 | 106.363 | 97.909 | 86.705 | 0.00 | 0.00 |
| ATOM | 34444 | O   | GLU | 2299 | 105.270 | 98.153 | 87.160 | 0.00 | 0.00 |
| ATOM | 34445 | N   | PRO | 2300 | 106.722 | 96.633 | 86.211 | 0.00 | 0.00 |
| ATOM | 34446 | CD  | PRO | 2300 | 108.011 | 96.157 | 85.823 | 0.00 | 0.00 |
| ATOM | 34447 | HD2 | PRO | 2300 | 108.600 | 96.803 | 85.172 | 0.00 | 0.00 |
| ATOM | 34448 | HD3 | PRO | 2300 | 108.493 | 96.230 | 86.797 | 0.00 | 0.00 |
| ATOM | 34449 | CG  | PRO | 2300 | 107.812 | 94.733 | 85.278 | 0.00 | 0.00 |
| ATOM | 34450 | HG2 | PRO | 2300 | 108.465 | 94.582 | 84.418 | 0.00 | 0.00 |
| ATOM | 34451 | HG3 | PRO | 2300 | 108.105 | 94.030 | 86.057 | 0.00 | 0.00 |
| ATOM | 34452 | CB  | PRO | 2300 | 106.331 | 94.708 | 84.906 | 0.00 | 0.00 |
| ATOM | 34453 | HB2 | PRO | 2300 | 106.267 | 94.934 | 83.842 | 0.00 | 0.00 |
| ATOM | 34454 | HB3 | PRO | 2300 | 106.081 | 93.650 | 84.991 | 0.00 | 0.00 |
| ATOM | 34455 | CA  | PRO | 2300 | 105.685 | 95.693 | 85.957 | 0.00 | 0.00 |
| ATOM | 34456 | HA  | PRO | 2300 | 104.844 | 96.178 | 85.461 | 0.00 | 0.00 |
| ATOM | 34457 | C   | PRO | 2300 | 105.239 | 94.855 | 87.133 | 0.00 | 0.00 |
| ATOM | 34458 | O   | PRO | 2300 | 105.968 | 94.620 | 88.071 | 0.00 | 0.00 |
| ATOM | 34459 | N   | ALA | 2301 | 103.989 | 94.536 | 87.159 | 0.00 | 0.00 |
| ATOM | 34460 | H   | ALA | 2301 | 103.474 | 94.745 | 86.315 | 0.00 | 0.00 |
| ATOM | 34461 | CA  | ALA | 2301 | 103.278 | 93.959 | 88.339 | 0.00 | 0.00 |
| ATOM | 34462 | HA  | ALA | 2301 | 103.638 | 94.463 | 89.236 | 0.00 | 0.00 |
| ATOM | 34463 | CB  | ALA | 2301 | 101.783 | 94.282 | 88.254 | 0.00 | 0.00 |
| ATOM | 34464 | HB1 | ALA | 2301 | 101.464 | 94.298 | 89.296 | 0.00 | 0.00 |
| ATOM | 34465 | HB2 | ALA | 2301 | 101.541 | 95.246 | 87.807 | 0.00 | 0.00 |
| ATOM | 34466 | HB3 | ALA | 2301 | 101.231 | 93.555 | 87.658 | 0.00 | 0.00 |
| ATOM | 34467 | C   | ALA | 2301 | 103.431 | 92.445 | 88.564 | 0.00 | 0.00 |

|      |       |      |     |      |         |        |        |      |      |
|------|-------|------|-----|------|---------|--------|--------|------|------|
| ATOM | 34468 | O    | ALA | 2301 | 103.525 | 91.703 | 87.573 | 0.00 | 0.00 |
| ATOM | 34469 | N    | ASP | 2302 | 103.346 | 92.033 | 89.821 | 0.00 | 0.00 |
| ATOM | 34470 | H    | ASP | 2302 | 103.463 | 92.761 | 90.511 | 0.00 | 0.00 |
| ATOM | 34471 | CA   | ASP | 2302 | 103.687 | 90.663 | 90.253 | 0.00 | 0.00 |
| ATOM | 34472 | HA   | ASP | 2302 | 104.107 | 90.078 | 89.435 | 0.00 | 0.00 |
| ATOM | 34473 | CB   | ASP | 2302 | 104.771 | 90.703 | 91.327 | 0.00 | 0.00 |
| ATOM | 34474 | HB2  | ASP | 2302 | 105.660 | 91.249 | 91.013 | 0.00 | 0.00 |
| ATOM | 34475 | HB3  | ASP | 2302 | 104.387 | 91.309 | 92.148 | 0.00 | 0.00 |
| ATOM | 34476 | CG   | ASP | 2302 | 105.292 | 89.361 | 91.804 | 0.00 | 0.00 |
| ATOM | 34477 | OD1  | ASP | 2302 | 105.736 | 88.617 | 90.932 | 0.00 | 0.00 |
| ATOM | 34478 | OD2  | ASP | 2302 | 105.158 | 89.050 | 93.028 | 0.00 | 0.00 |
| ATOM | 34479 | C    | ASP | 2302 | 102.411 | 89.808 | 90.530 | 0.00 | 0.00 |
| ATOM | 34480 | O    | ASP | 2302 | 102.287 | 88.717 | 90.056 | 0.00 | 0.00 |
| ATOM | 34481 | N    | VAL | 2303 | 101.454 | 90.489 | 91.120 | 0.00 | 0.00 |
| ATOM | 34482 | H    | VAL | 2303 | 101.696 | 91.361 | 91.568 | 0.00 | 0.00 |
| ATOM | 34483 | CA   | VAL | 2303 | 100.071 | 89.929 | 91.527 | 0.00 | 0.00 |
| ATOM | 34484 | HA   | VAL | 2303 | 99.602  | 89.233 | 90.831 | 0.00 | 0.00 |
| ATOM | 34485 | CB   | VAL | 2303 | 100.068 | 89.399 | 92.977 | 0.00 | 0.00 |
| ATOM | 34486 | HB   | VAL | 2303 | 99.073  | 88.975 | 93.108 | 0.00 | 0.00 |
| ATOM | 34487 | CG1  | VAL | 2303 | 101.145 | 88.362 | 93.278 | 0.00 | 0.00 |
| ATOM | 34488 | 1HG1 | VAL | 2303 | 100.948 | 88.023 | 94.295 | 0.00 | 0.00 |
| ATOM | 34489 | 2HG1 | VAL | 2303 | 101.184 | 87.553 | 92.547 | 0.00 | 0.00 |
| ATOM | 34490 | 3HG1 | VAL | 2303 | 102.124 | 88.841 | 93.277 | 0.00 | 0.00 |
| ATOM | 34491 | CG2  | VAL | 2303 | 100.395 | 90.557 | 93.959 | 0.00 | 0.00 |
| ATOM | 34492 | 1HG2 | VAL | 2303 | 99.686  | 91.381 | 93.881 | 0.00 | 0.00 |
| ATOM | 34493 | 2HG2 | VAL | 2303 | 100.401 | 90.160 | 94.974 | 0.00 | 0.00 |

|            |      |     |      |         |        |        |      |      |
|------------|------|-----|------|---------|--------|--------|------|------|
| ATOM 34494 | 3HG2 | VAL | 2303 | 101.345 | 91.077 | 93.838 | 0.00 | 0.00 |
| ATOM 34495 | C    | VAL | 2303 | 99.129  | 91.195 | 91.317 | 0.00 | 0.00 |
| ATOM 34496 | O    | VAL | 2303 | 99.609  | 92.318 | 91.528 | 0.00 | 0.00 |
| ATOM 34497 | N    | LEU | 2304 | 97.841  | 90.966 | 90.945 | 0.00 | 0.00 |
| ATOM 34498 | H    | LEU | 2304 | 97.574  | 90.049 | 90.616 | 0.00 | 0.00 |
| ATOM 34499 | CA   | LEU | 2304 | 96.767  | 91.981 | 90.690 | 0.00 | 0.00 |
| ATOM 34500 | HA   | LEU | 2304 | 96.954  | 92.801 | 91.383 | 0.00 | 0.00 |
| ATOM 34501 | CB   | LEU | 2304 | 96.853  | 92.331 | 89.195 | 0.00 | 0.00 |
| ATOM 34502 | HB2  | LEU | 2304 | 96.824  | 91.410 | 88.612 | 0.00 | 0.00 |
| ATOM 34503 | HB3  | LEU | 2304 | 95.973  | 92.910 | 88.918 | 0.00 | 0.00 |
| ATOM 34504 | CG   | LEU | 2304 | 98.077  | 93.252 | 88.744 | 0.00 | 0.00 |
| ATOM 34505 | HG   | LEU | 2304 | 99.040  | 92.841 | 89.046 | 0.00 | 0.00 |
| ATOM 34506 | CD1  | LEU | 2304 | 98.100  | 93.492 | 87.189 | 0.00 | 0.00 |
| ATOM 34507 | 1HD1 | LEU | 2304 | 98.981  | 94.112 | 87.021 | 0.00 | 0.00 |
| ATOM 34508 | 2HD1 | LEU | 2304 | 98.273  | 92.532 | 86.702 | 0.00 | 0.00 |
| ATOM 34509 | 3HD1 | LEU | 2304 | 97.215  | 94.060 | 86.903 | 0.00 | 0.00 |
| ATOM 34510 | CD2  | LEU | 2304 | 97.989  | 94.506 | 89.392 | 0.00 | 0.00 |
| ATOM 34511 | 1HD2 | LEU | 2304 | 97.140  | 95.100 | 89.052 | 0.00 | 0.00 |
| ATOM 34512 | 2HD2 | LEU | 2304 | 97.883  | 94.544 | 90.476 | 0.00 | 0.00 |
| ATOM 34513 | 3HD2 | LEU | 2304 | 98.931  | 94.969 | 89.099 | 0.00 | 0.00 |
| ATOM 34514 | C    | LEU | 2304 | 95.330  | 91.450 | 90.919 | 0.00 | 0.00 |
| ATOM 34515 | O    | LEU | 2304 | 95.013  | 90.237 | 90.887 | 0.00 | 0.00 |
| ATOM 34516 | N    | PRO | 2305 | 94.407  | 92.375 | 91.160 | 0.00 | 0.00 |
| ATOM 34517 | CD   | PRO | 2305 | 94.645  | 93.826 | 91.487 | 0.00 | 0.00 |
| ATOM 34518 | HD2  | PRO | 2305 | 95.134  | 94.329 | 90.653 | 0.00 | 0.00 |
| ATOM 34519 | HD3  | PRO | 2305 | 95.084  | 93.941 | 92.479 | 0.00 | 0.00 |

|            |              |        |        |        |      |      |
|------------|--------------|--------|--------|--------|------|------|
| ATOM 34520 | CG PRO 2305  | 93.209 | 94.496 | 91.520 | 0.00 | 0.00 |
| ATOM 34521 | HG2 PRO 2305 | 93.227 | 95.289 | 92.267 | 0.00 | 0.00 |
| ATOM 34522 | HG3 PRO 2305 | 92.913 | 94.728 | 90.497 | 0.00 | 0.00 |
| ATOM 34523 | CB PRO 2305  | 92.373 | 93.311 | 92.060 | 0.00 | 0.00 |
| ATOM 34524 | HB2 PRO 2305 | 92.666 | 93.224 | 93.106 | 0.00 | 0.00 |
| ATOM 34525 | HB3 PRO 2305 | 91.303 | 93.490 | 91.949 | 0.00 | 0.00 |
| ATOM 34526 | CA PRO 2305  | 92.951 | 92.062 | 91.298 | 0.00 | 0.00 |
| ATOM 34527 | HA PRO 2305  | 92.826 | 91.241 | 92.003 | 0.00 | 0.00 |
| ATOM 34528 | C PRO 2305   | 92.240 | 91.749 | 90.021 | 0.00 | 0.00 |
| ATOM 34529 | O PRO 2305   | 92.801 | 91.668 | 88.917 | 0.00 | 0.00 |
| ATOM 34530 | N MET 2306   | 90.996 | 91.398 | 90.322 | 0.00 | 0.00 |
| ATOM 34531 | H MET 2306   | 90.643 | 91.458 | 91.266 | 0.00 | 0.00 |
| ATOM 34532 | CA MET 2306  | 89.995 | 91.030 | 89.327 | 0.00 | 0.00 |
| ATOM 34533 | HA MET 2306  | 89.024 | 90.876 | 89.797 | 0.00 | 0.00 |
| ATOM 34534 | CB MET 2306  | 89.775 | 92.166 | 88.326 | 0.00 | 0.00 |
| ATOM 34535 | HB2 MET 2306 | 90.553 | 92.192 | 87.562 | 0.00 | 0.00 |
| ATOM 34536 | HB3 MET 2306 | 88.828 | 91.927 | 87.842 | 0.00 | 0.00 |
| ATOM 34537 | CG MET 2306  | 89.553 | 93.572 | 88.959 | 0.00 | 0.00 |
| ATOM 34538 | HG2 MET 2306 | 88.696 | 93.406 | 89.610 | 0.00 | 0.00 |
| ATOM 34539 | HG3 MET 2306 | 90.439 | 93.775 | 89.562 | 0.00 | 0.00 |
| ATOM 34540 | SD MET 2306  | 89.300 | 95.043 | 87.887 | 0.00 | 0.00 |
| ATOM 34541 | CE MET 2306  | 87.468 | 95.043 | 87.873 | 0.00 | 0.00 |
| ATOM 34542 | HE1 MET 2306 | 86.985 | 94.100 | 87.615 | 0.00 | 0.00 |
| ATOM 34543 | HE2 MET 2306 | 87.015 | 95.166 | 88.857 | 0.00 | 0.00 |
| ATOM 34544 | HE3 MET 2306 | 87.100 | 95.779 | 87.159 | 0.00 | 0.00 |
| ATOM 34545 | C MET 2306   | 90.217 | 89.605 | 88.638 | 0.00 | 0.00 |

|            |      |     |      |        |        |        |      |      |
|------------|------|-----|------|--------|--------|--------|------|------|
| ATOM 34546 | O    | MET | 2306 | 89.634 | 89.323 | 87.562 | 0.00 | 0.00 |
| ATOM 34547 | N    | ALA | 2307 | 91.150 | 88.755 | 89.146 | 0.00 | 0.00 |
| ATOM 34548 | H    | ALA | 2307 | 91.646 | 89.147 | 89.934 | 0.00 | 0.00 |
| ATOM 34549 | CA   | ALA | 2307 | 91.633 | 87.449 | 88.630 | 0.00 | 0.00 |
| ATOM 34550 | HA   | ALA | 2307 | 91.020 | 87.350 | 87.734 | 0.00 | 0.00 |
| ATOM 34551 | CB   | ALA | 2307 | 93.068 | 87.616 | 88.062 | 0.00 | 0.00 |
| ATOM 34552 | HB1  | ALA | 2307 | 93.551 | 86.720 | 87.671 | 0.00 | 0.00 |
| ATOM 34553 | HB2  | ALA | 2307 | 93.167 | 88.268 | 87.194 | 0.00 | 0.00 |
| ATOM 34554 | HB3  | ALA | 2307 | 93.667 | 87.977 | 88.898 | 0.00 | 0.00 |
| ATOM 34555 | C    | ALA | 2307 | 91.261 | 86.170 | 89.385 | 0.00 | 0.00 |
| ATOM 34556 | O    | ALA | 2307 | 90.085 | 85.685 | 89.451 | 0.00 | 0.00 |
| ATOM 34557 | N    | GLN | 2308 | 92.258 | 85.524 | 90.037 | 0.00 | 0.00 |
| ATOM 34558 | H    | GLN | 2308 | 93.136 | 86.022 | 90.012 | 0.00 | 0.00 |
| ATOM 34559 | CA   | GLN | 2308 | 92.205 | 84.155 | 90.580 | 0.00 | 0.00 |
| ATOM 34560 | HA   | GLN | 2308 | 92.082 | 83.479 | 89.734 | 0.00 | 0.00 |
| ATOM 34561 | CB   | GLN | 2308 | 93.588 | 83.799 | 91.154 | 0.00 | 0.00 |
| ATOM 34562 | HB2  | GLN | 2308 | 94.017 | 84.605 | 91.749 | 0.00 | 0.00 |
| ATOM 34563 | HB3  | GLN | 2308 | 93.568 | 82.911 | 91.787 | 0.00 | 0.00 |
| ATOM 34564 | CG   | GLN | 2308 | 94.555 | 83.525 | 89.928 | 0.00 | 0.00 |
| ATOM 34565 | HG2  | GLN | 2308 | 94.091 | 82.788 | 89.272 | 0.00 | 0.00 |
| ATOM 34566 | HG3  | GLN | 2308 | 94.732 | 84.398 | 89.300 | 0.00 | 0.00 |
| ATOM 34567 | CD   | GLN | 2308 | 95.878 | 82.975 | 90.381 | 0.00 | 0.00 |
| ATOM 34568 | OE1  | GLN | 2308 | 96.296 | 82.901 | 91.545 | 0.00 | 0.00 |
| ATOM 34569 | NE2  | GLN | 2308 | 96.625 | 82.370 | 89.467 | 0.00 | 0.00 |
| ATOM 34570 | 1HE2 | GLN | 2308 | 97.416 | 81.819 | 89.767 | 0.00 | 0.00 |
| ATOM 34571 | 2HE2 | GLN | 2308 | 96.414 | 82.397 | 88.479 | 0.00 | 0.00 |

|      |       |      |     |      |        |        |        |      |      |
|------|-------|------|-----|------|--------|--------|--------|------|------|
| ATOM | 34572 | C    | GLN | 2308 | 91.141 | 83.953 | 91.642 | 0.00 | 0.00 |
| ATOM | 34573 | O    | GLN | 2308 | 90.605 | 82.820 | 91.831 | 0.00 | 0.00 |
| ATOM | 34574 | N    | ARG | 2309 | 90.796 | 85.036 | 92.351 | 0.00 | 0.00 |
| ATOM | 34575 | H    | ARG | 2309 | 91.323 | 85.887 | 92.213 | 0.00 | 0.00 |
| ATOM | 34576 | CA   | ARG | 2309 | 89.679 | 85.041 | 93.283 | 0.00 | 0.00 |
| ATOM | 34577 | HA   | ARG | 2309 | 89.986 | 84.250 | 93.967 | 0.00 | 0.00 |
| ATOM | 34578 | CB   | ARG | 2309 | 89.793 | 86.483 | 93.849 | 0.00 | 0.00 |
| ATOM | 34579 | HB2  | ARG | 2309 | 90.833 | 86.802 | 93.916 | 0.00 | 0.00 |
| ATOM | 34580 | HB3  | ARG | 2309 | 89.137 | 87.207 | 93.365 | 0.00 | 0.00 |
| ATOM | 34581 | CG   | ARG | 2309 | 89.394 | 86.583 | 95.320 | 0.00 | 0.00 |
| ATOM | 34582 | HG2  | ARG | 2309 | 88.465 | 86.041 | 95.500 | 0.00 | 0.00 |
| ATOM | 34583 | HG3  | ARG | 2309 | 90.138 | 86.007 | 95.871 | 0.00 | 0.00 |
| ATOM | 34584 | CD   | ARG | 2309 | 89.280 | 88.065 | 95.982 | 0.00 | 0.00 |
| ATOM | 34585 | HD2  | ARG | 2309 | 88.528 | 88.624 | 95.425 | 0.00 | 0.00 |
| ATOM | 34586 | HD3  | ARG | 2309 | 88.975 | 87.966 | 97.024 | 0.00 | 0.00 |
| ATOM | 34587 | NE   | ARG | 2309 | 90.620 | 88.724 | 95.862 | 0.00 | 0.00 |
| ATOM | 34588 | HE   | ARG | 2309 | 90.626 | 89.265 | 95.009 | 0.00 | 0.00 |
| ATOM | 34589 | CZ   | ARG | 2309 | 91.759 | 88.441 | 96.410 | 0.00 | 0.00 |
| ATOM | 34590 | NH1  | ARG | 2309 | 91.765 | 87.717 | 97.488 | 0.00 | 0.00 |
| ATOM | 34591 | 1HH1 | ARG | 2309 | 92.608 | 87.466 | 97.984 | 0.00 | 0.00 |
| ATOM | 34592 | 2HH1 | ARG | 2309 | 90.837 | 87.452 | 97.784 | 0.00 | 0.00 |
| ATOM | 34593 | NH2  | ARG | 2309 | 92.838 | 88.831 | 95.823 | 0.00 | 0.00 |
| ATOM | 34594 | 1HH2 | ARG | 2309 | 93.740 | 88.597 | 96.211 | 0.00 | 0.00 |
| ATOM | 34595 | 2HH2 | ARG | 2309 | 92.736 | 89.497 | 95.071 | 0.00 | 0.00 |
| ATOM | 34596 | C    | ARG | 2309 | 88.297 | 84.643 | 92.699 | 0.00 | 0.00 |
| ATOM | 34597 | O    | ARG | 2309 | 87.437 | 84.256 | 93.470 | 0.00 | 0.00 |

|            |     |          |        |        |        |      |      |
|------------|-----|----------|--------|--------|--------|------|------|
| ATOM 34598 | N   | TYR 2310 | 88.089 | 84.732 | 91.377 | 0.00 | 0.00 |
| ATOM 34599 | H   | TYR 2310 | 88.800 | 84.997 | 90.710 | 0.00 | 0.00 |
| ATOM 34600 | CA  | TYR 2310 | 86.802 | 84.687 | 90.707 | 0.00 | 0.00 |
| ATOM 34601 | HA  | TYR 2310 | 86.002 | 84.549 | 91.434 | 0.00 | 0.00 |
| ATOM 34602 | CB  | TYR 2310 | 86.492 | 86.082 | 90.038 | 0.00 | 0.00 |
| ATOM 34603 | HB2 | TYR 2310 | 87.168 | 86.224 | 89.194 | 0.00 | 0.00 |
| ATOM 34604 | HB3 | TYR 2310 | 85.483 | 86.018 | 89.631 | 0.00 | 0.00 |
| ATOM 34605 | CG  | TYR 2310 | 86.641 | 87.152 | 91.039 | 0.00 | 0.00 |
| ATOM 34606 | CD1 | TYR 2310 | 87.838 | 87.818 | 90.953 | 0.00 | 0.00 |
| ATOM 34607 | HD1 | TYR 2310 | 88.691 | 87.440 | 90.409 | 0.00 | 0.00 |
| ATOM 34608 | CE1 | TYR 2310 | 88.021 | 89.031 | 91.629 | 0.00 | 0.00 |
| ATOM 34609 | HE1 | TYR 2310 | 89.000 | 89.477 | 91.527 | 0.00 | 0.00 |
| ATOM 34610 | CZ  | TYR 2310 | 86.905 | 89.557 | 92.330 | 0.00 | 0.00 |
| ATOM 34611 | OH  | TYR 2310 | 87.042 | 90.758 | 92.955 | 0.00 | 0.00 |
| ATOM 34612 | HH  | TYR 2310 | 87.837 | 91.223 | 92.687 | 0.00 | 0.00 |
| ATOM 34613 | CE2 | TYR 2310 | 85.700 | 88.903 | 92.496 | 0.00 | 0.00 |
| ATOM 34614 | HE2 | TYR 2310 | 84.832 | 89.348 | 92.959 | 0.00 | 0.00 |
| ATOM 34615 | CD2 | TYR 2310 | 85.552 | 87.662 | 91.787 | 0.00 | 0.00 |
| ATOM 34616 | HD2 | TYR 2310 | 84.642 | 87.092 | 91.898 | 0.00 | 0.00 |
| ATOM 34617 | C   | TYR 2310 | 86.727 | 83.509 | 89.766 | 0.00 | 0.00 |
| ATOM 34618 | O   | TYR 2310 | 85.586 | 83.071 | 89.550 | 0.00 | 0.00 |
| ATOM 34619 | N   | PHE 2311 | 87.814 | 83.002 | 89.148 | 0.00 | 0.00 |
| ATOM 34620 | H   | PHE 2311 | 88.712 | 83.398 | 89.383 | 0.00 | 0.00 |
| ATOM 34621 | CA  | PHE 2311 | 87.768 | 81.996 | 88.039 | 0.00 | 0.00 |
| ATOM 34622 | HA  | PHE 2311 | 86.716 | 81.889 | 87.774 | 0.00 | 0.00 |
| ATOM 34623 | CB  | PHE 2311 | 88.493 | 82.433 | 86.761 | 0.00 | 0.00 |

|      |       |      |     |      |        |        |        |      |      |
|------|-------|------|-----|------|--------|--------|--------|------|------|
| ATOM | 34624 | HB2  | PHE | 2311 | 89.566 | 82.421 | 86.955 | 0.00 | 0.00 |
| ATOM | 34625 | HB3  | PHE | 2311 | 88.417 | 81.672 | 85.984 | 0.00 | 0.00 |
| ATOM | 34626 | CG   | PHE | 2311 | 88.044 | 83.759 | 86.204 | 0.00 | 0.00 |
| ATOM | 34627 | CD1  | PHE | 2311 | 88.779 | 84.923 | 86.411 | 0.00 | 0.00 |
| ATOM | 34628 | HD1  | PHE | 2311 | 89.773 | 84.818 | 86.819 | 0.00 | 0.00 |
| ATOM | 34629 | CE1  | PHE | 2311 | 88.209 | 86.218 | 86.103 | 0.00 | 0.00 |
| ATOM | 34630 | HE1  | PHE | 2311 | 88.823 | 87.096 | 86.238 | 0.00 | 0.00 |
| ATOM | 34631 | CZ   | PHE | 2311 | 86.935 | 86.340 | 85.607 | 0.00 | 0.00 |
| ATOM | 34632 | HZ   | PHE | 2311 | 86.440 | 87.279 | 85.408 | 0.00 | 0.00 |
| ATOM | 34633 | CE2  | PHE | 2311 | 86.181 | 85.202 | 85.325 | 0.00 | 0.00 |
| ATOM | 34634 | HE2  | PHE | 2311 | 85.222 | 85.203 | 84.828 | 0.00 | 0.00 |
| ATOM | 34635 | CD2  | PHE | 2311 | 86.748 | 83.948 | 85.693 | 0.00 | 0.00 |
| ATOM | 34636 | HD2  | PHE | 2311 | 86.111 | 83.076 | 85.701 | 0.00 | 0.00 |
| ATOM | 34637 | C    | PHE | 2311 | 88.337 | 80.647 | 88.555 | 0.00 | 0.00 |
| ATOM | 34638 | O    | PHE | 2311 | 89.443 | 80.559 | 89.094 | 0.00 | 0.00 |
| ATOM | 34639 | N    | LEU | 2312 | 87.566 | 79.571 | 88.272 | 0.00 | 0.00 |
| ATOM | 34640 | H    | LEU | 2312 | 86.668 | 79.666 | 87.820 | 0.00 | 0.00 |
| ATOM | 34641 | CA   | LEU | 2312 | 88.030 | 78.156 | 88.422 | 0.00 | 0.00 |
| ATOM | 34642 | HA   | LEU | 2312 | 88.436 | 78.097 | 89.432 | 0.00 | 0.00 |
| ATOM | 34643 | CB   | LEU | 2312 | 86.743 | 77.324 | 88.356 | 0.00 | 0.00 |
| ATOM | 34644 | HB2  | LEU | 2312 | 85.939 | 77.778 | 88.936 | 0.00 | 0.00 |
| ATOM | 34645 | HB3  | LEU | 2312 | 86.527 | 77.436 | 87.293 | 0.00 | 0.00 |
| ATOM | 34646 | CG   | LEU | 2312 | 86.975 | 75.827 | 88.633 | 0.00 | 0.00 |
| ATOM | 34647 | HG   | LEU | 2312 | 87.902 | 75.481 | 88.175 | 0.00 | 0.00 |
| ATOM | 34648 | CD1  | LEU | 2312 | 87.101 | 75.751 | 90.162 | 0.00 | 0.00 |
| ATOM | 34649 | 1HD1 | LEU | 2312 | 86.311 | 76.360 | 90.601 | 0.00 | 0.00 |



|            |          |      |        |        |        |      |      |
|------------|----------|------|--------|--------|--------|------|------|
| ATOM 34650 | 2HD1 LEU | 2312 | 86.999 | 74.725 | 90.518 | 0.00 | 0.00 |
| ATOM 34651 | 3HD1 LEU | 2312 | 88.106 | 76.040 | 90.467 | 0.00 | 0.00 |
| ATOM 34652 | CD2 LEU  | 2312 | 85.758 | 74.964 | 88.355 | 0.00 | 0.00 |
| ATOM 34653 | 1HD2 LEU | 2312 | 85.883 | 73.903 | 88.572 | 0.00 | 0.00 |
| ATOM 34654 | 2HD2 LEU | 2312 | 84.989 | 75.195 | 89.093 | 0.00 | 0.00 |
| ATOM 34655 | 3HD2 LEU | 2312 | 85.410 | 75.231 | 87.357 | 0.00 | 0.00 |
| ATOM 34656 | C LEU    | 2312 | 89.089 | 77.707 | 87.375 | 0.00 | 0.00 |
| ATOM 34657 | O LEU    | 2312 | 89.925 | 76.921 | 87.617 | 0.00 | 0.00 |
| ATOM 34658 | N PHC    | 2313 | 89.092 | 78.272 | 86.143 | 0.00 | 0.00 |
| ATOM 34659 | H PHC    | 2313 | 88.440 | 79.043 | 86.140 | 0.00 | 0.00 |
| ATOM 34660 | CA PHC   | 2313 | 90.206 | 78.189 | 85.219 | 0.00 | 0.00 |
| ATOM 34661 | HA PHC   | 2313 | 91.131 | 77.885 | 85.708 | 0.00 | 0.00 |
| ATOM 34662 | CB PHC   | 2313 | 90.003 | 77.137 | 84.175 | 0.00 | 0.00 |
| ATOM 34663 | HB2 PHC  | 2313 | 89.220 | 77.244 | 83.425 | 0.00 | 0.00 |
| ATOM 34664 | HB3 PHC  | 2313 | 90.811 | 77.324 | 83.468 | 0.00 | 0.00 |
| ATOM 34665 | CG PHC   | 2313 | 90.143 | 75.696 | 84.688 | 0.00 | 0.00 |
| ATOM 34666 | CD1 PHC  | 2313 | 89.044 | 75.027 | 85.251 | 0.00 | 0.00 |
| ATOM 34667 | HD1 PHC  | 2313 | 88.053 | 75.434 | 85.387 | 0.00 | 0.00 |
| ATOM 34668 | CE1 PHC  | 2313 | 89.291 | 73.718 | 85.754 | 0.00 | 0.00 |
| ATOM 34669 | HE1 PHC  | 2313 | 88.515 | 73.152 | 86.248 | 0.00 | 0.00 |
| ATOM 34670 | CZ PHC   | 2313 | 90.572 | 73.155 | 85.773 | 0.00 | 0.00 |
| ATOM 34671 | HZ PHC   | 2313 | 90.771 | 72.173 | 86.176 | 0.00 | 0.00 |
| ATOM 34672 | CE2 PHC  | 2313 | 91.630 | 73.828 | 85.068 | 0.00 | 0.00 |
| ATOM 34673 | HE2 PHC  | 2313 | 92.637 | 73.457 | 84.948 | 0.00 | 0.00 |
| ATOM 34674 | CD2 PHC  | 2313 | 91.338 | 75.042 | 84.507 | 0.00 | 0.00 |
| ATOM 34675 | HD2 PHC  | 2313 | 92.154 | 75.534 | 83.999 | 0.00 | 0.00 |

ATOM 34676 C PHC 2313 90.498 79.519 84.503 0.00 0.00  
ATOM 34677 O PHC 2313 89.607 80.169 84.019 0.00 0.00  
ATOM 34678 OXT PHC 2313 91.675 79.918 84.317 0.00 0.00  
ATOM 34679 O ONB 2314 95.850 92.134 65.031 0.00 0.00  
ATOM 34680 H1 ONB 2314 95.588 92.552 65.855 0.00 0.00  
ATOM 34681 H1 ON1 2315 97.089 91.460 64.243 0.00 0.00  
ATOM 34682 O ON1 2315 96.818 91.804 63.330 0.00 0.00  
ATOM 34683 H2 ON1 2315 95.822 91.952 63.236 0.00 0.00  
ATOM 34684 H1 ON2 2316 95.693 90.376 65.434 0.00 0.00  
ATOM 34685 O ON2 2316 95.353 89.930 64.592 0.00 0.00  
ATOM 34686 H2 ON2 2316 95.737 90.299 63.731 0.00 0.00  
TER

## References

- (1) Jacobson, M. P.; Friesner, R. A.; Xiang, Z.; Honig, B. *J. Mol. Biol.* **2002**, *320*, 597.
- (2) Jacobson, M. P.; Pincus, D. L.; Rapp, C. S.; Day, T. J. F.; Honig, B.; Shaw, D. E.; Friesner, R. A. *Proteins: Struct. Funct. Bioinform.* **2004**, *55*, 351.
- (3) ; 2.2 ed.; Schrödinger, LLC: New York, NY, 2010.
- (4) Hornak, V.; Abel, R.; Okur, A.; Strockbine, B.; Roitberg, A.; Simmerling, C. *Proteins: Structure, Function & Bioinformatics* **2006**, *65*, 712.
- (5) Peters, M. B.; Yang, Y.; Wang, B.; Füsti-Molnár, L.; Weaver, M. N.; Merz, K. M., Jr. *J. Chem. Theor. Comput.* **2010**, *6*, 2935.
- (6) Frisch, M. J.; Trucks, G. W.; Schlegel, H. B.; Scuseria, G. E.; Robb, M. A.; Cheeseman, J. R.; Montgomery, J. A., Jr.; Vreven, T.; Kudin, K. N.; Burant, J. C.; Millam, J. M.; Iyengar, S. S.; Tomasi, J.; Barone, V.; Mennucci, B.; Cossi, M.; Scalmani, G.; Rega, N.; Petersson, G. A.; Nakatsuji, H.; Hada, M.; Ehara, M.; Toyota, K.; Fukuda, R.; Hasegawa, J.; Ishida, M.; Nakajima, T.; Honda, Y.; Kitao, O.; Nakai, H.; Klene, M.; Li, X.; Knox, J. E.; Hratchian, H. P.; Cross, J. B.; Bakken, V.; Adamo, C.; Jaramillo, J.; Gomperts, R.; Stratmann, R. E.; Yazyev, O.; Austin, A. J.; Cammi, R.; Pomelli, C.; Ochterski, J. W.; Ayala, P. Y.; Morokuma, K.; Voth, G. A.; Salvador, P.; Dannenberg, J. J.; Zakrzewski, V. G.; Dapprich, S.; Daniels, A. D.; Strain, M. C.; Farkas, O.; Malick, D. K.; Rabuck, A. D.; Raghavachari, K.; Foresman, J. B.; Ortiz, J. V.; Cui, Q.; Baboul, A. G.; Clifford, S.; Cioslowski, J.; Stefanov, B. B.; Liu, G.; Liashenko, A.; Piskorz, P.; Komaromi, I.; Martin, R. L.; Fox, D. J.; Keith, T.; Al-Laham, M. A.; Peng, C. Y.; Nanayakkara, A.; Challacombe, M.; Gill, P. M. W.; Johnson, B.; Chen, W.; Wong, M. W.; Gonzalez, C.; Pople, J. A.; Revision E.01 ed.; Gaussian, Inc.: Wallingford, CT, United States, 2004.
- (7) Becke, A. D. *Phys. Rev. A: At. Mol. Opt. Phys.* **1988**, *38*, 3098.
- (8) Lee, C.; Yang, W.; Parr, R. G. *Phys. Rev. B: Condens. Matter* **1988**, *37*, 785.
- (9) Miehlich, B.; Savin, A.; Stoll, H.; Preuss, H. *Chem. Phys. Lett.* **1989**, *157*, 200.
- (10) Becke, A. D. *J. Chem. Phys.* **1993**, *98*, 5648.
- (11) Hay, P. J.; Dunning, T. H., Jr. In *Modern Theoretical Chemistry*; Schaefer, H. F., III, Ed.; Plenum: New York, 1976; Vol. 3, p 1.
- (12) Hay, P. J.; Wadt, W. R. *J. Chem. Phys.* **1985**, *82*, 270.
- (13) Wadt, W. R.; Hay, P. J. *J. Chem. Phys.* **1985**, *82*, 284.
- (14) Hay, P. J.; Wadt, W. R. *J. Chem. Phys.* **1985**, *82*, 299.
- (15) Ditchfield, R.; Hehre, W. J.; Pople, J. A. *J. Chem. Phys.* **1971**, *54*, 724.
- (16) Hehre, W. J.; Ditchfield, R.; Pople, J. A. *J. Chem. Phys.* **1972**, *56*, 2257.
- (17) Hariharan, P. C.; Pople, J. A. *Theor. Chem. Acc.* **1973**, *28*, 213.
- (18) Hariharan, P. C.; Pople, J. A. *Mol. Phys.* **1974**, *27*, 209.
- (19) Gordon, M. S. *Chem. Phys. Lett.* **1980**, *76*, 163.
- (20) Francl, M. M.; Pietro, W. J.; Hehre, W. J.; Binkley, J. S.; Gordon, M. S.; DeFrees, D. J.; Pople, J. A. *J. Chem. Phys.* **1982**, *77*, 3654.
- (21) Blaudeau, J.-P.; McGrath, M. P.; Curtiss, L. A.; Radom, L. *J. Chem. Phys.* **1997**, *107*, 5016.
- (22) Rassolov, V. A.; Pople, J. A.; Ratner, M. A.; Windus, T. L. *J. Chem. Phys.* **1998**, *109*, 1223.

- (23) Binning, R. C., Jr.; Curtiss, L. A. *J. Comput. Chem.* **1990**, *11*, 1206.
- (24) Rassolov, V. A.; Ratner, M. A.; Pople, J. A.; Redfern, P. C.; Curtiss, L. A. *J. Comput. Chem.* **2001**, *22*, 976.
- (25) Jorgensen, W. L.; Chandrasekhar, J.; Madura, J. D.; Impey, R. W.; Klein, M. L. *J. Chem. Phys.* **1983**, *79*, 926.
- (26) Case, D. A.; Darden, T. A.; Cheatham, T. E., III; Simmerling, C. L.; Wang, J.; Duke, R. E.; Luo, R.; Walker, R. C.; Zhang, W.; Merz, K. M., Jr.; Roberts, B. P.; Wang, B.; Hayik, S.; Roitberg, A. E.; Seabra, G. M.; Kolossváry, I.; Wong, K. F.; Paesani, F.; J., V.; Liu, J.; Wu, X.; Brozell, S. R.; Steinbrecher, T.; Gohlke, H.; Cai, Q.; Ye, X.; Wang, J.; Hsieh, M.-J.; Cui, G.; Roe, D. R.; Mathews, D. H.; Seetin, M. G.; Sagui, C.; Babin, V.; Luchko, T.; Gusarov, S.; Kovalenko, A.; Kollman, P. A.; University of California: San Francisco, 2011.
- (27) Darden, T.; York, D.; Pedersen, L. *J. Chem. Phys.* **1993**, *98*, 10089.
- (28) Essmann, U.; Perera, L.; Berkowitz, M. L.; Darden, T.; Lee, H.; Pedersen, L. G. *J. Chem. Phys.* **1995**, *103*, 8577.
- (29) Crowley, M. F.; Darden, T. A.; Cheatham, T. E., III; Deerfield, D. W., II. *J. Supercomput.* **1997**, *11*, 255.
- (30) Sindhikara, D. J.; Kim, S.; Voter, A. F.; Roitberg, A. E. *J. Chem. Theory Comput.* **2009**, *5*, 1624.
